# Supplementary material for: Metabolic and proteomic signatures of type 2 diabetes subtypes in an Arab population
Source: PubMed Central journal article supplement (PMC9675829; doi:10.1038/s41467-022-34754-z), 2022-11-19

M20675 : 1,5-anhydroglucitol (1,5-AG)

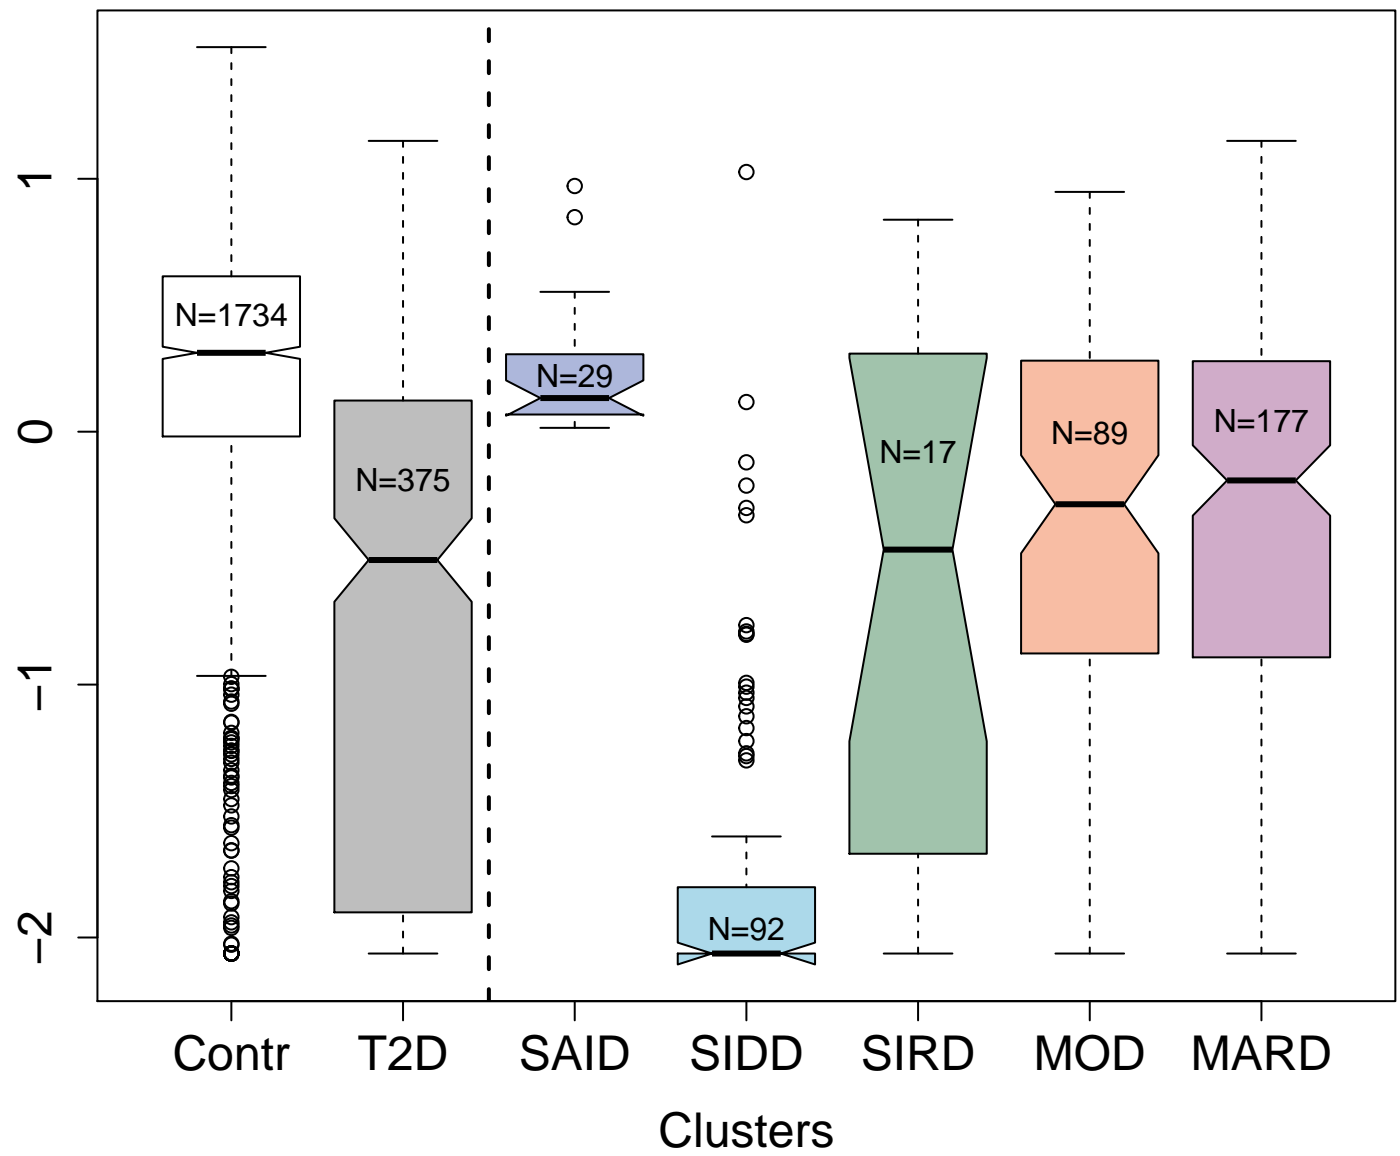

M48153 : mannose

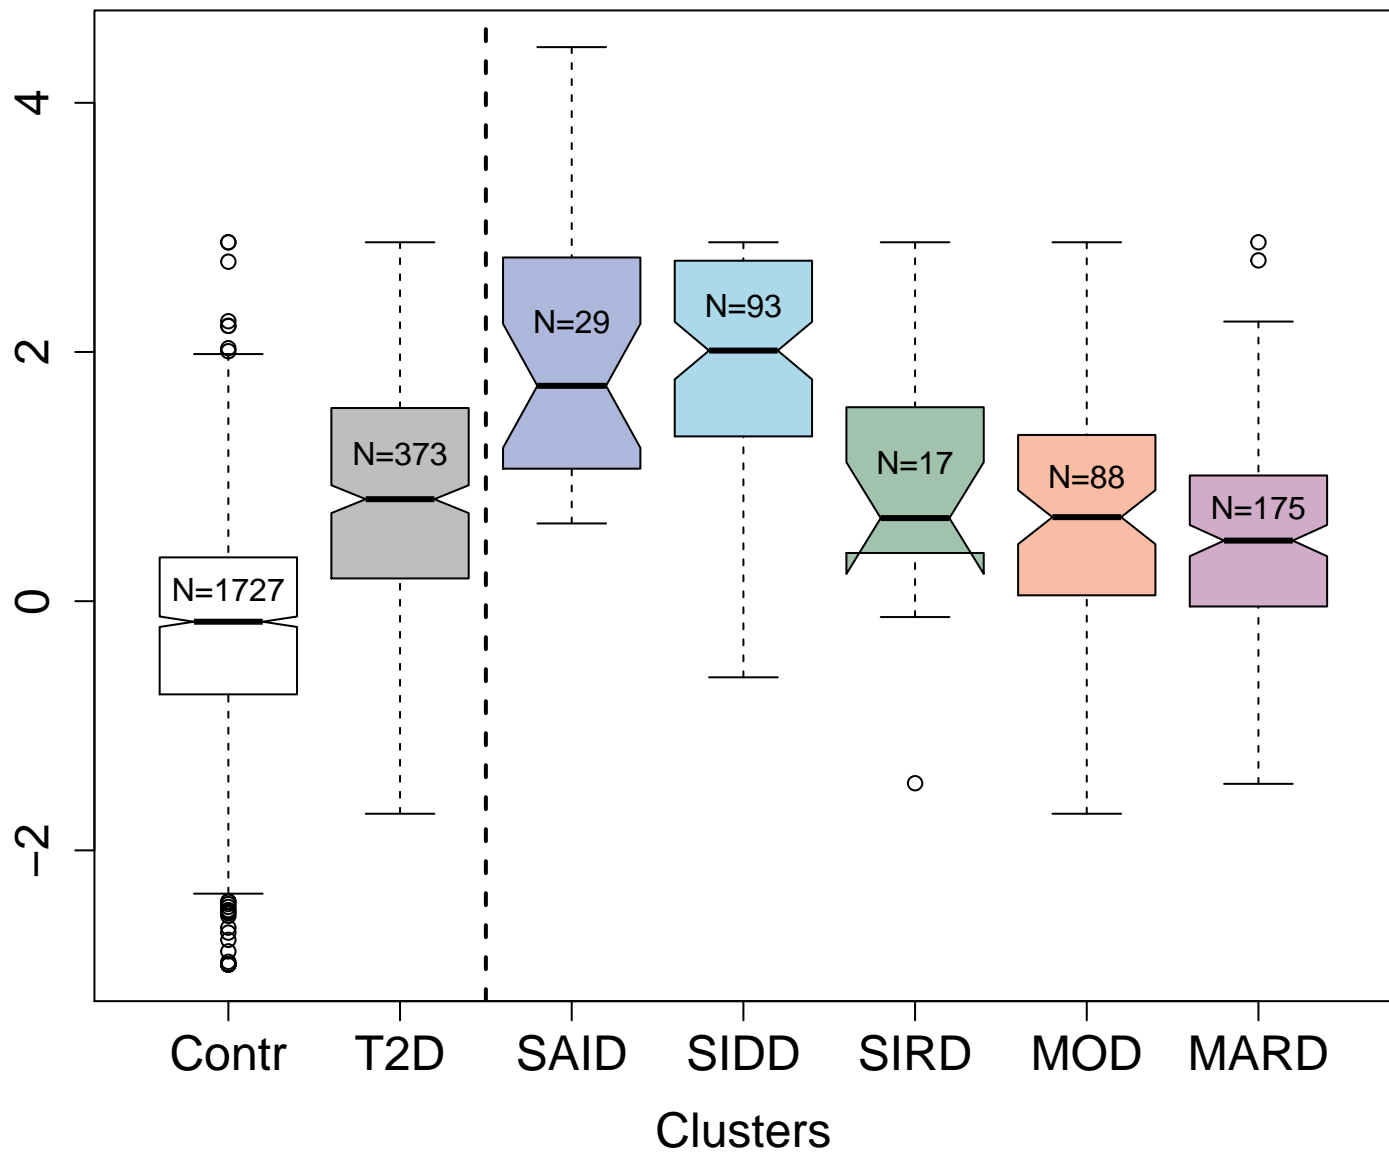

M48152 : glucose

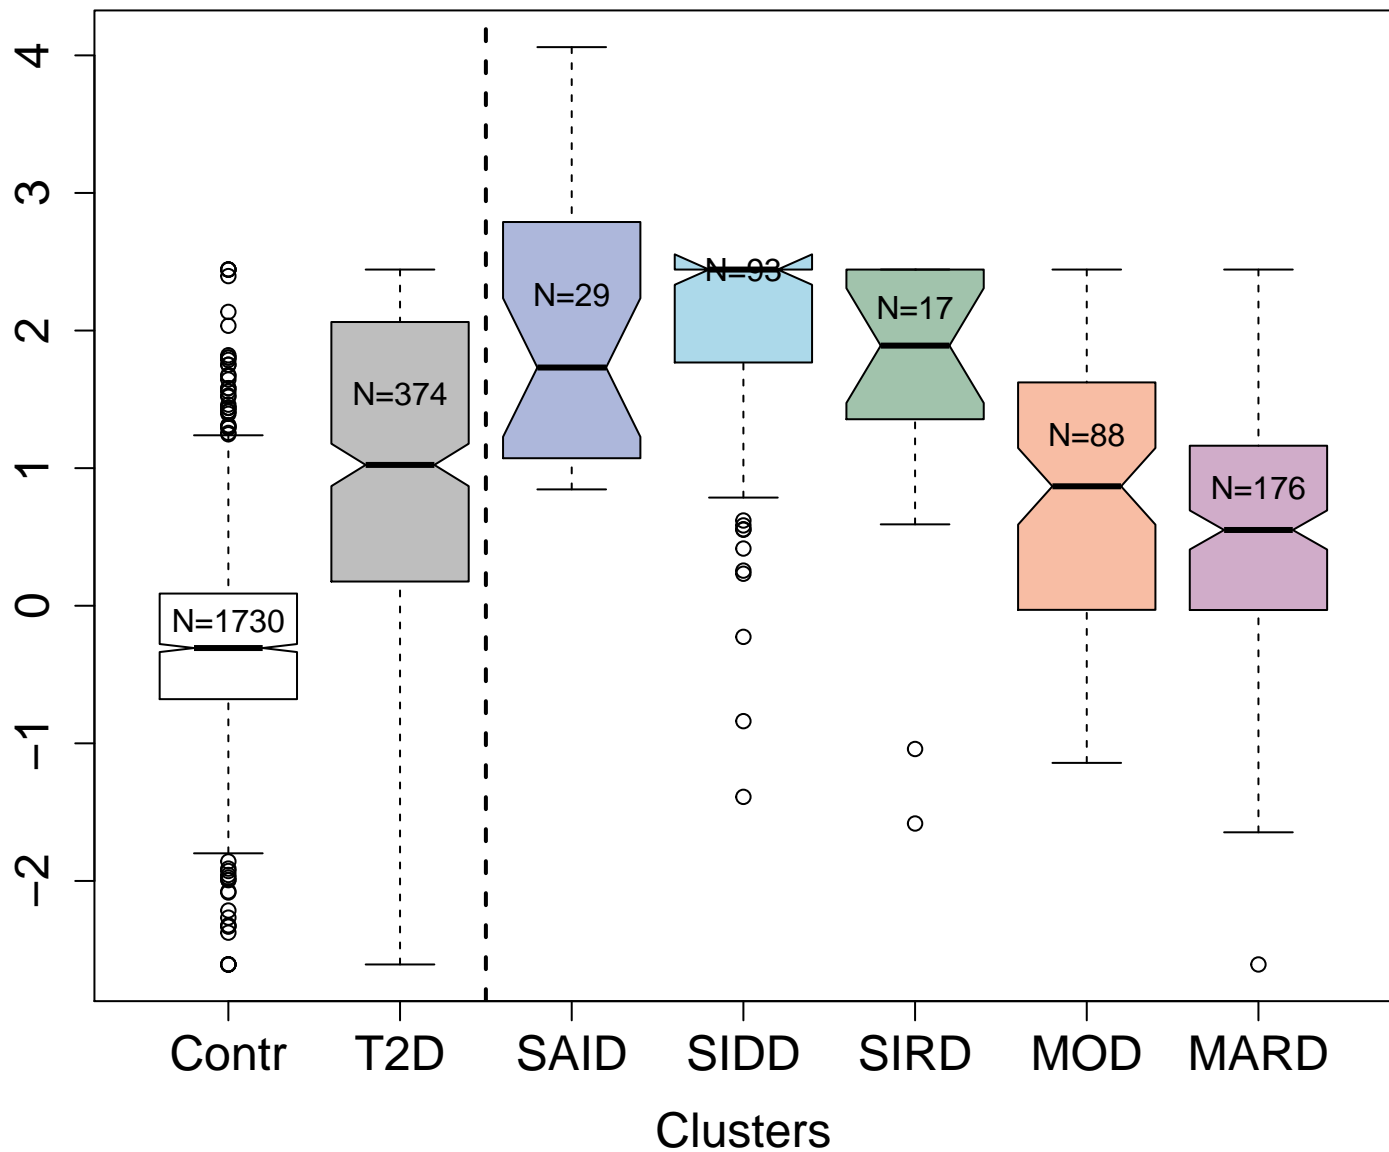

M48195 : fructose

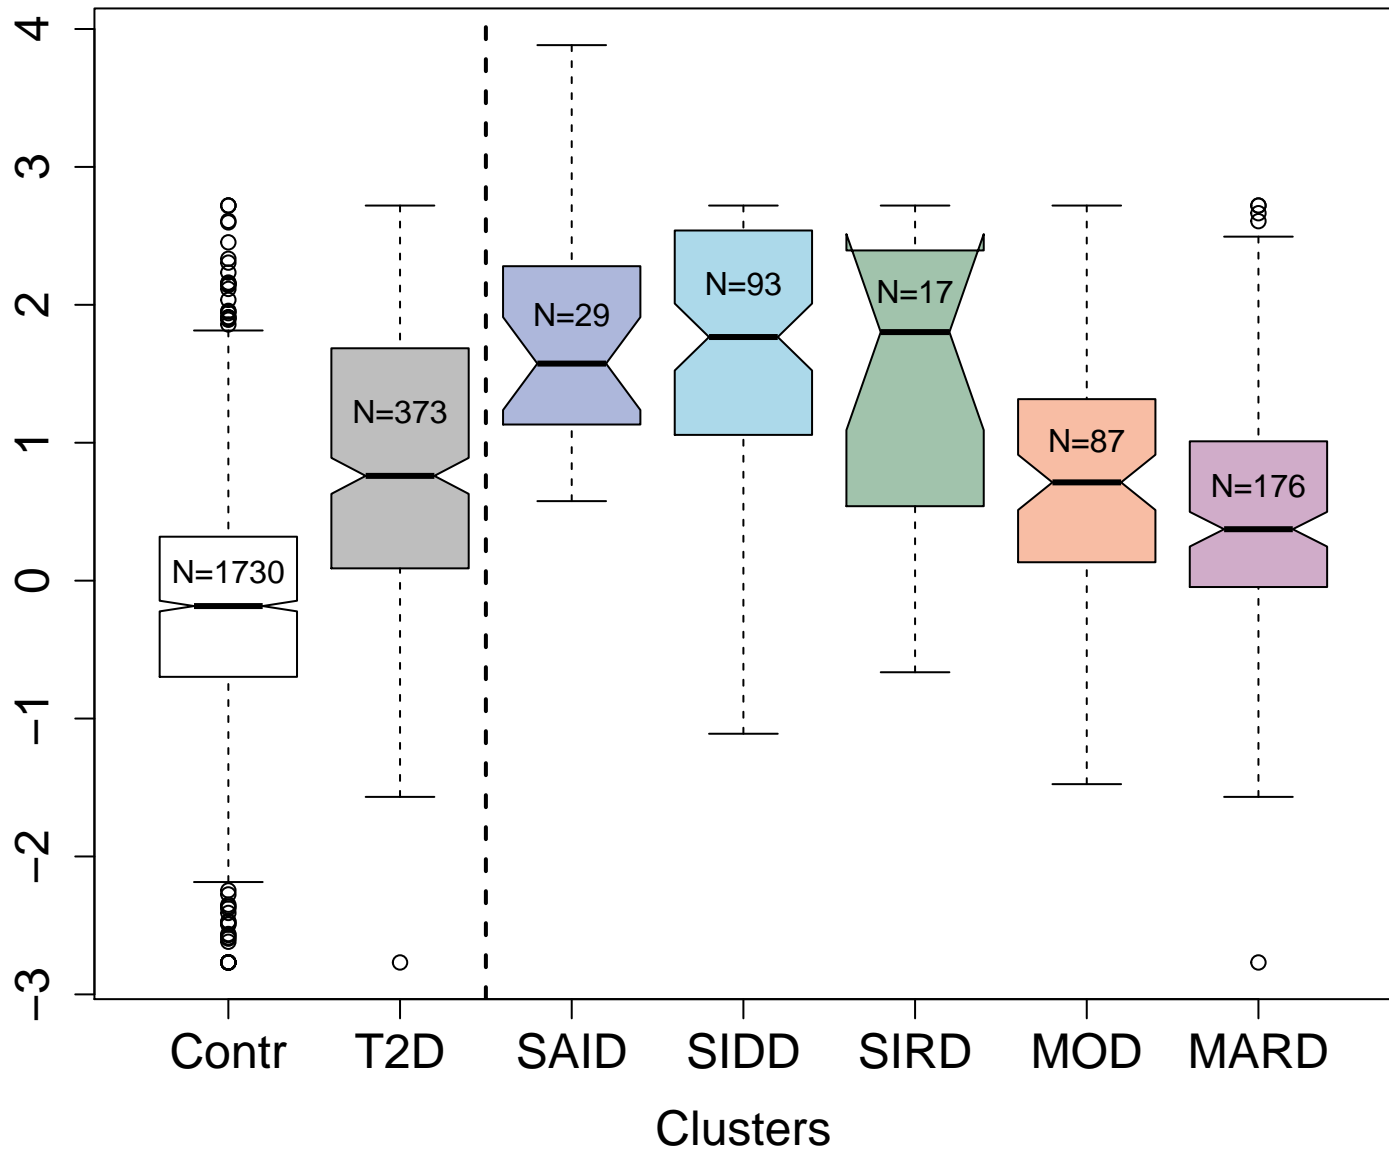

M62864 : mannonate\*

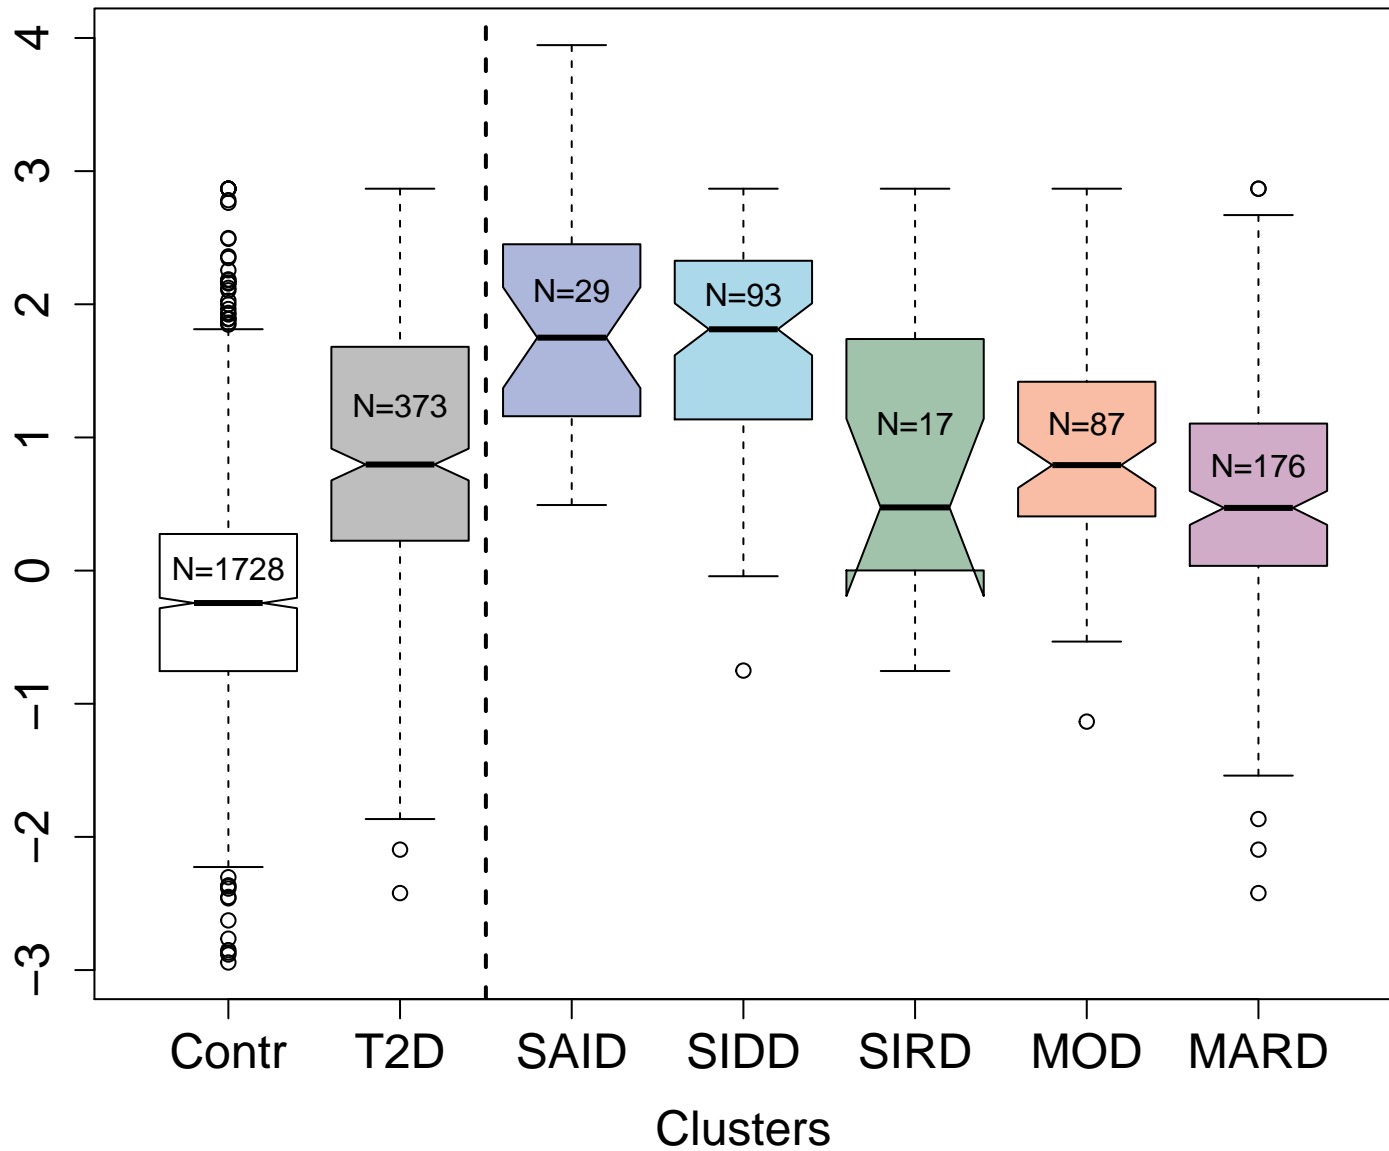

M52530 : X - 24334

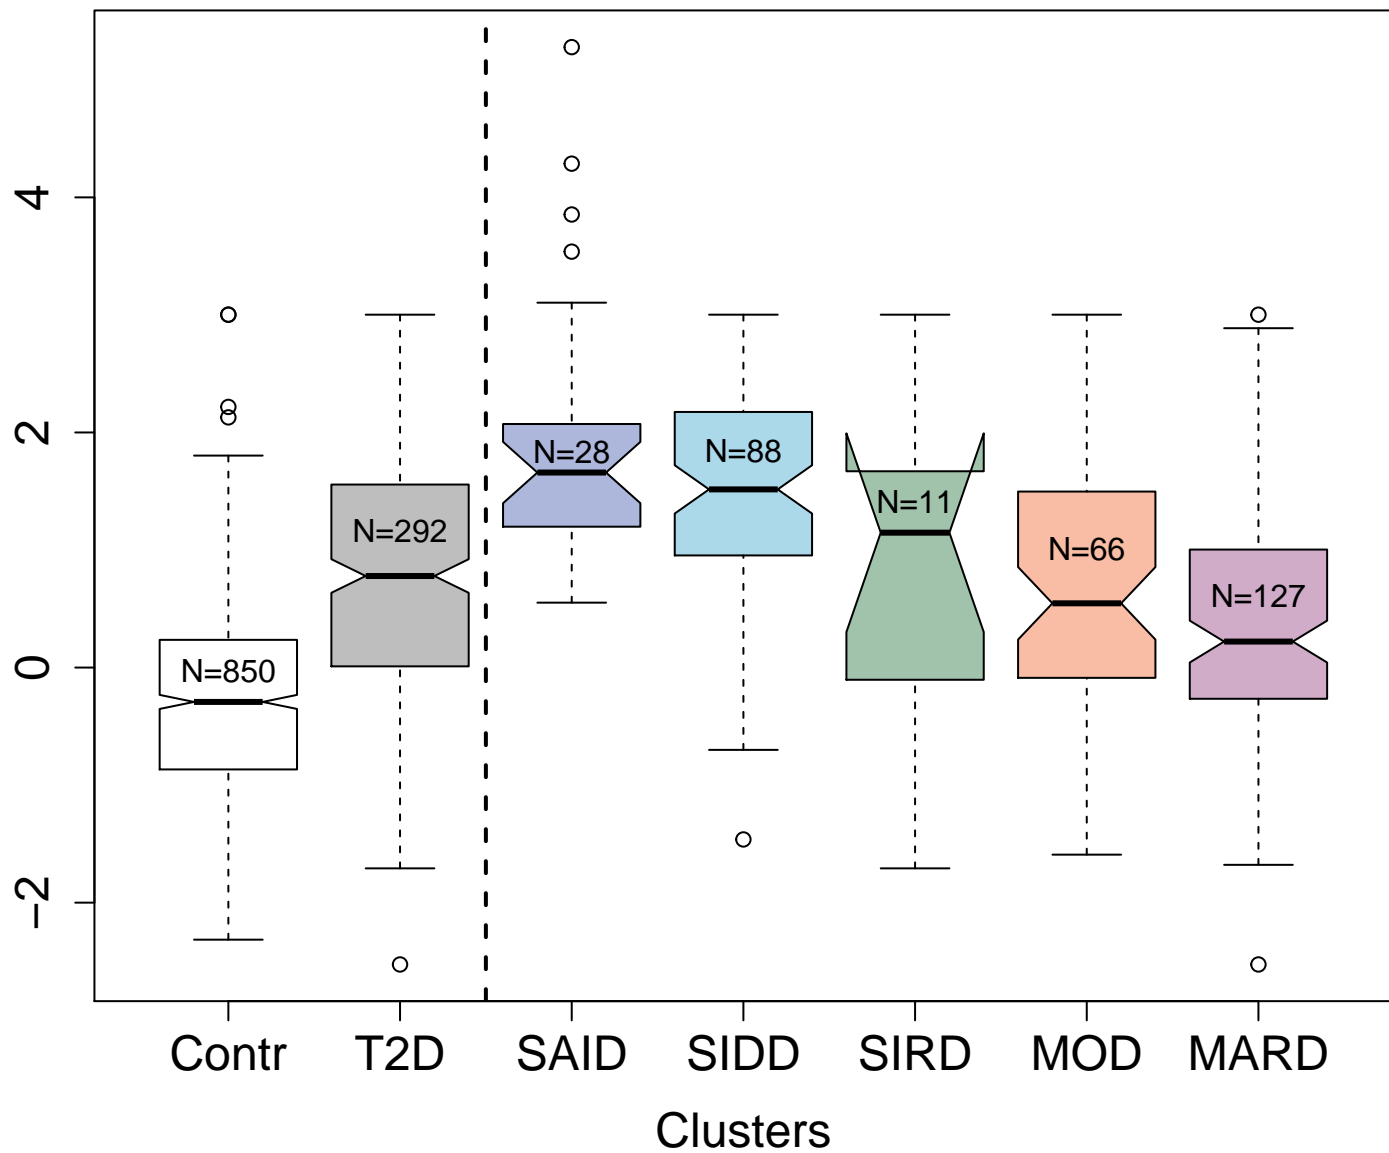

M52281 : 2-hydroxybutyrate/2-hydroxyisobutyrate

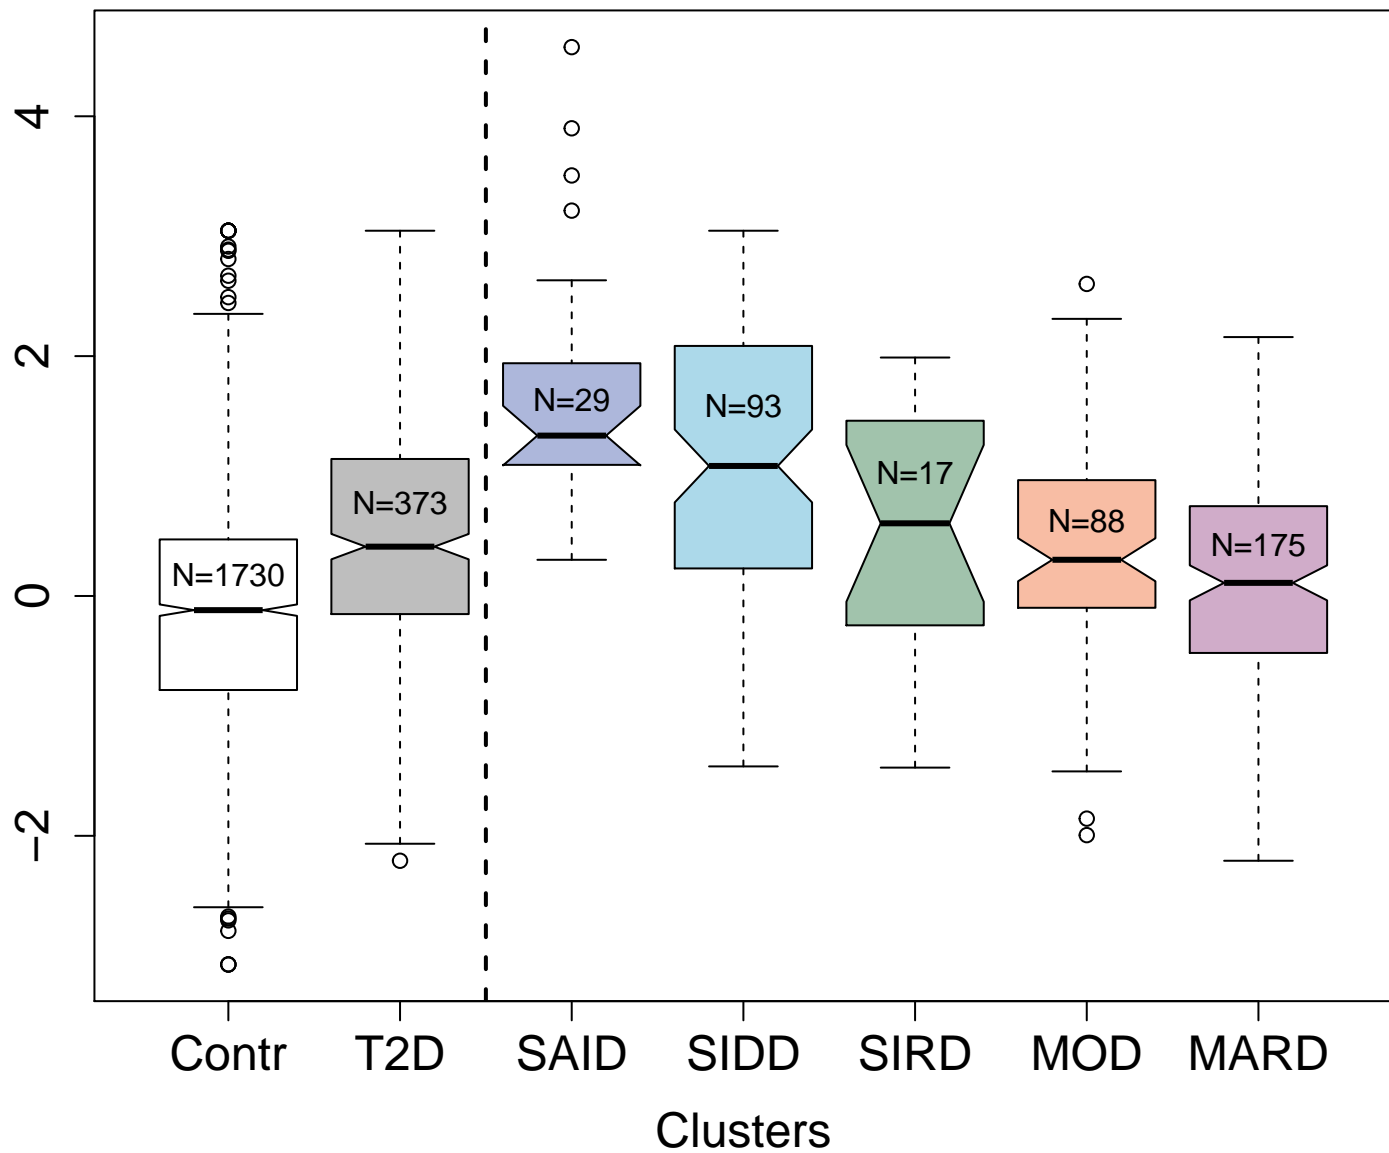

M587 : gluconate

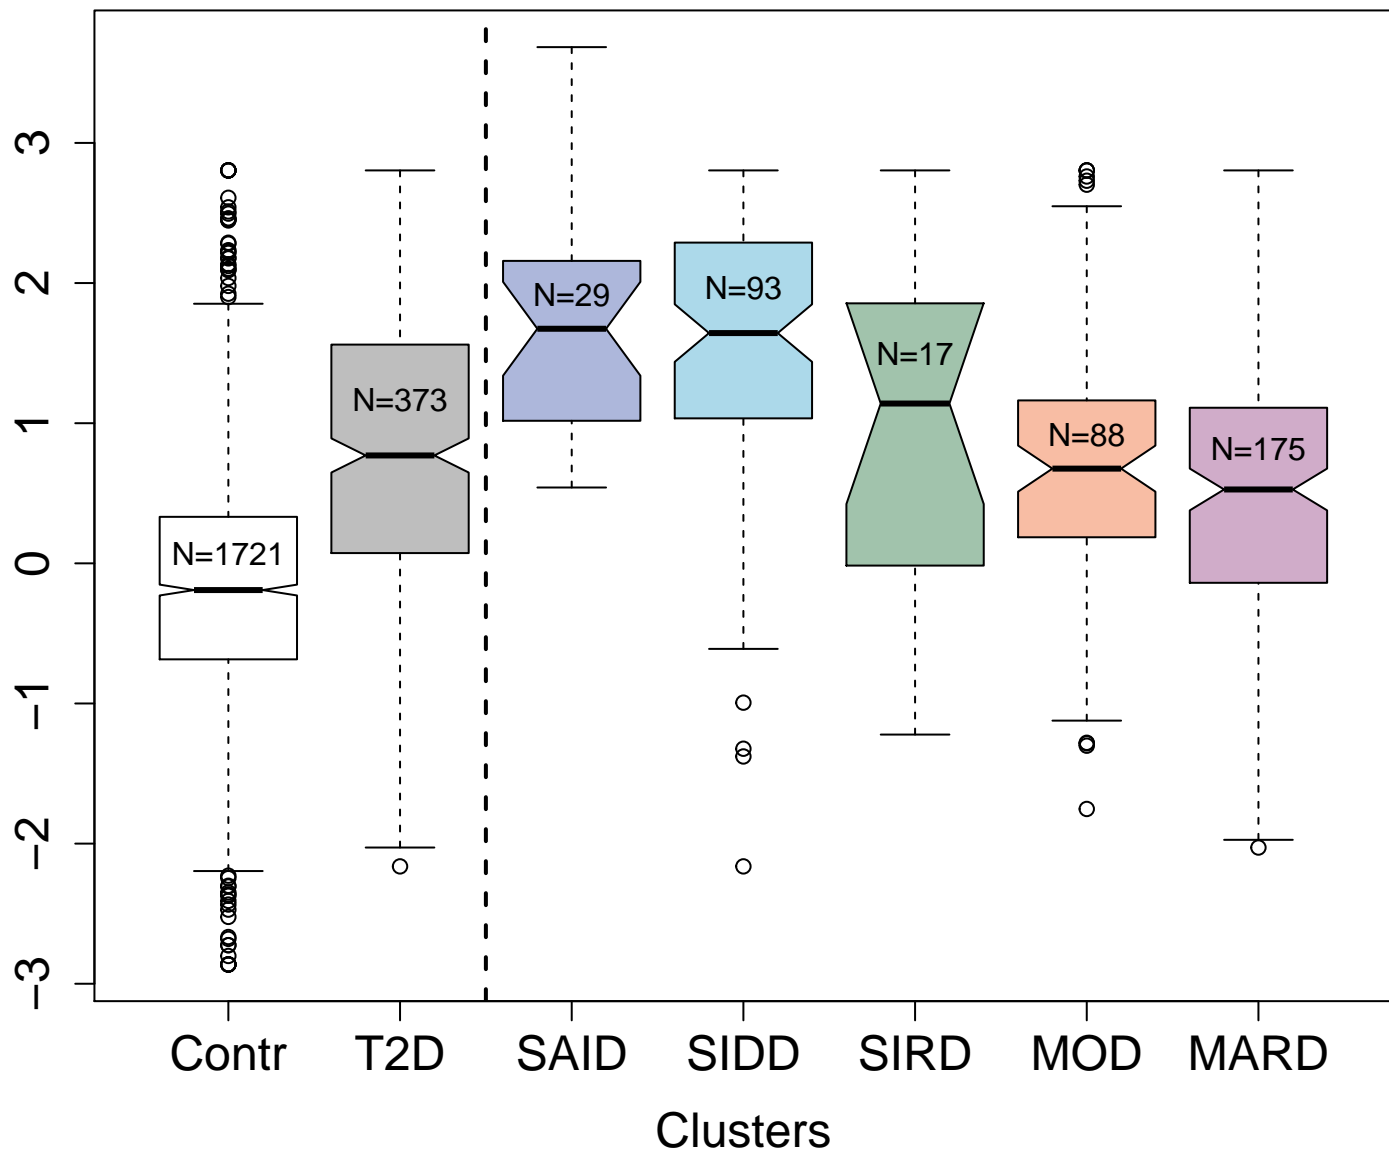



M46225 : pyroglutamine\*

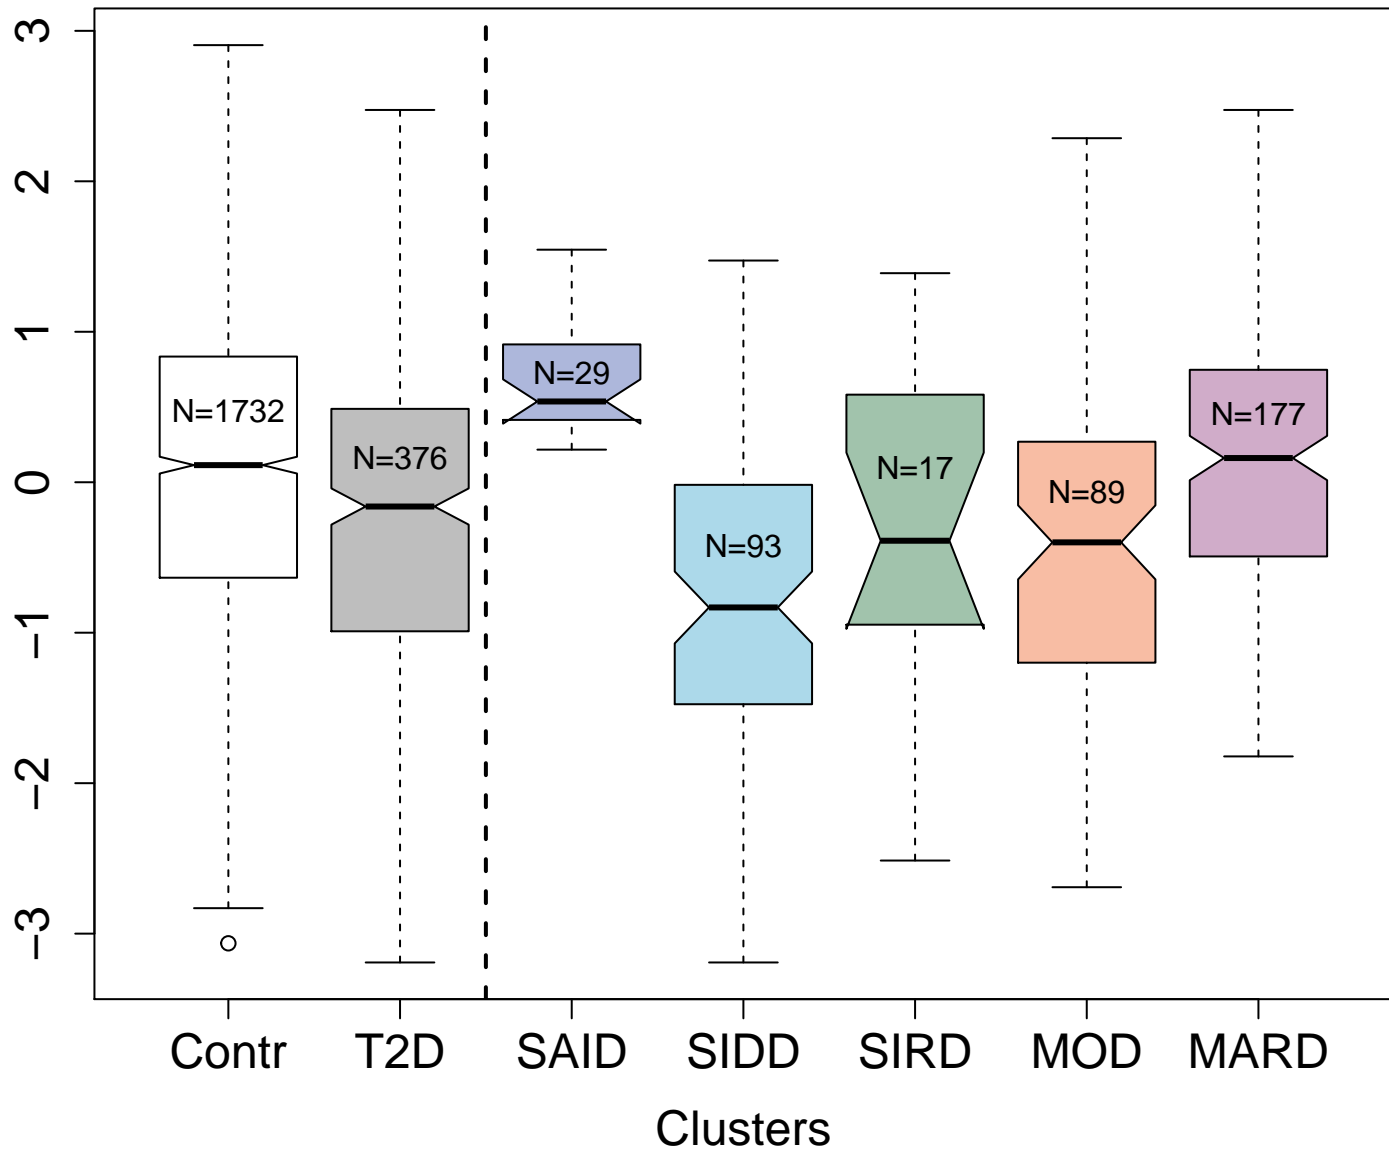

M34396 : choline phosphate

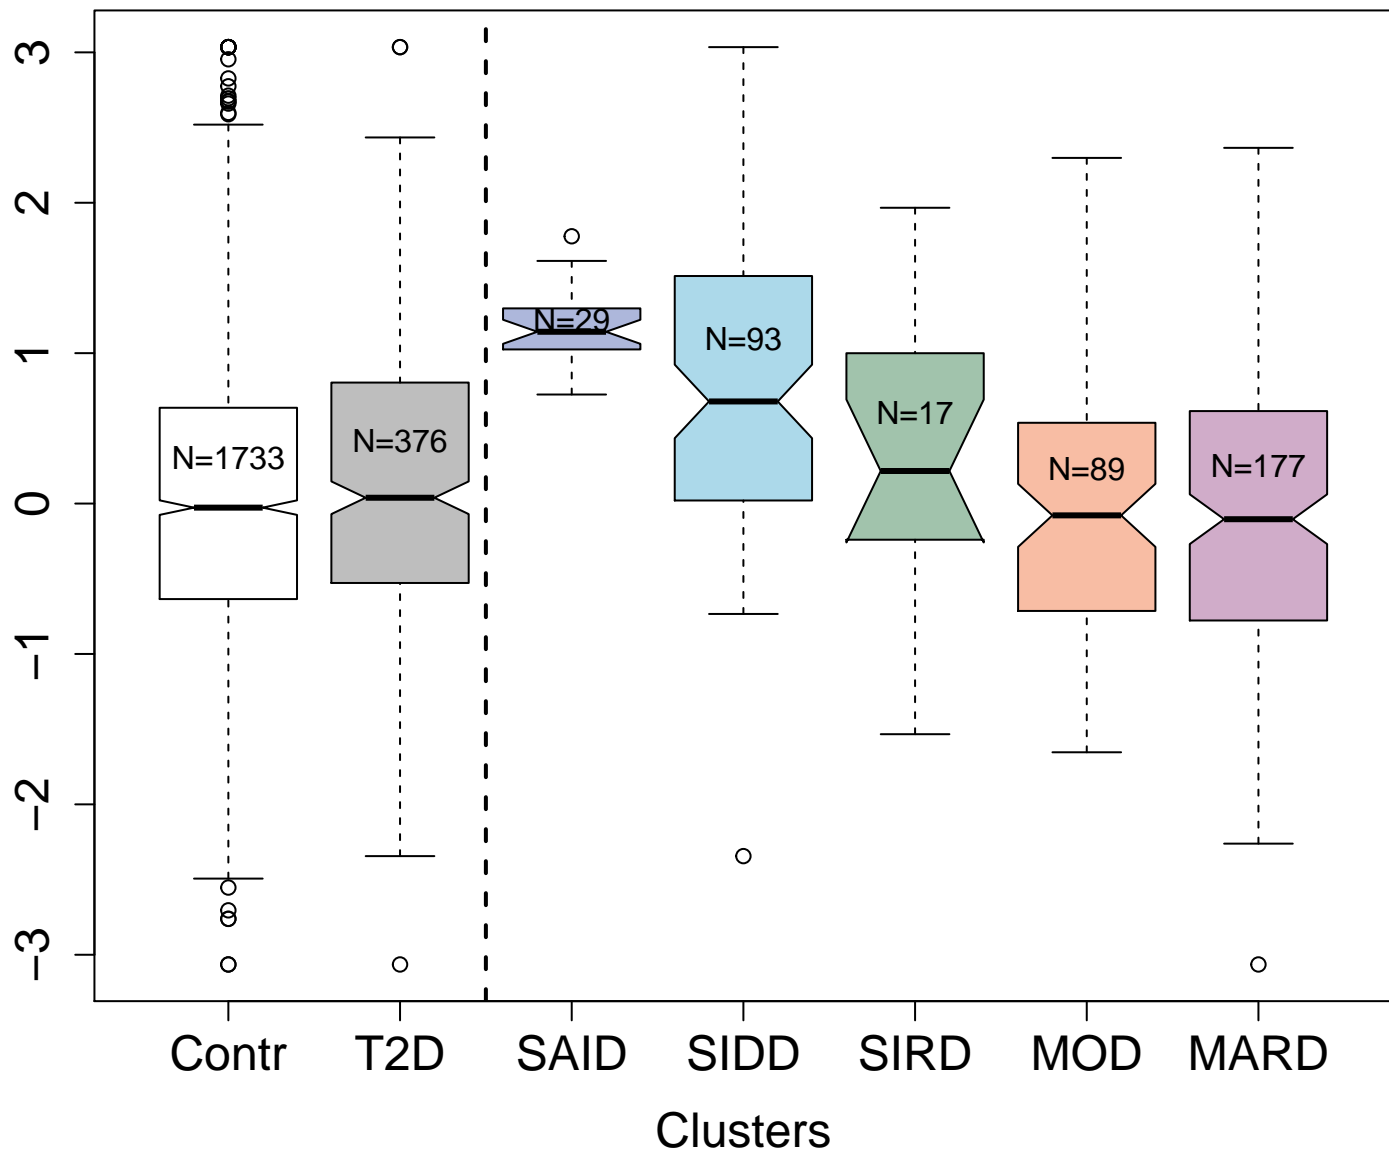

M62503 : 6-bromotryptophan

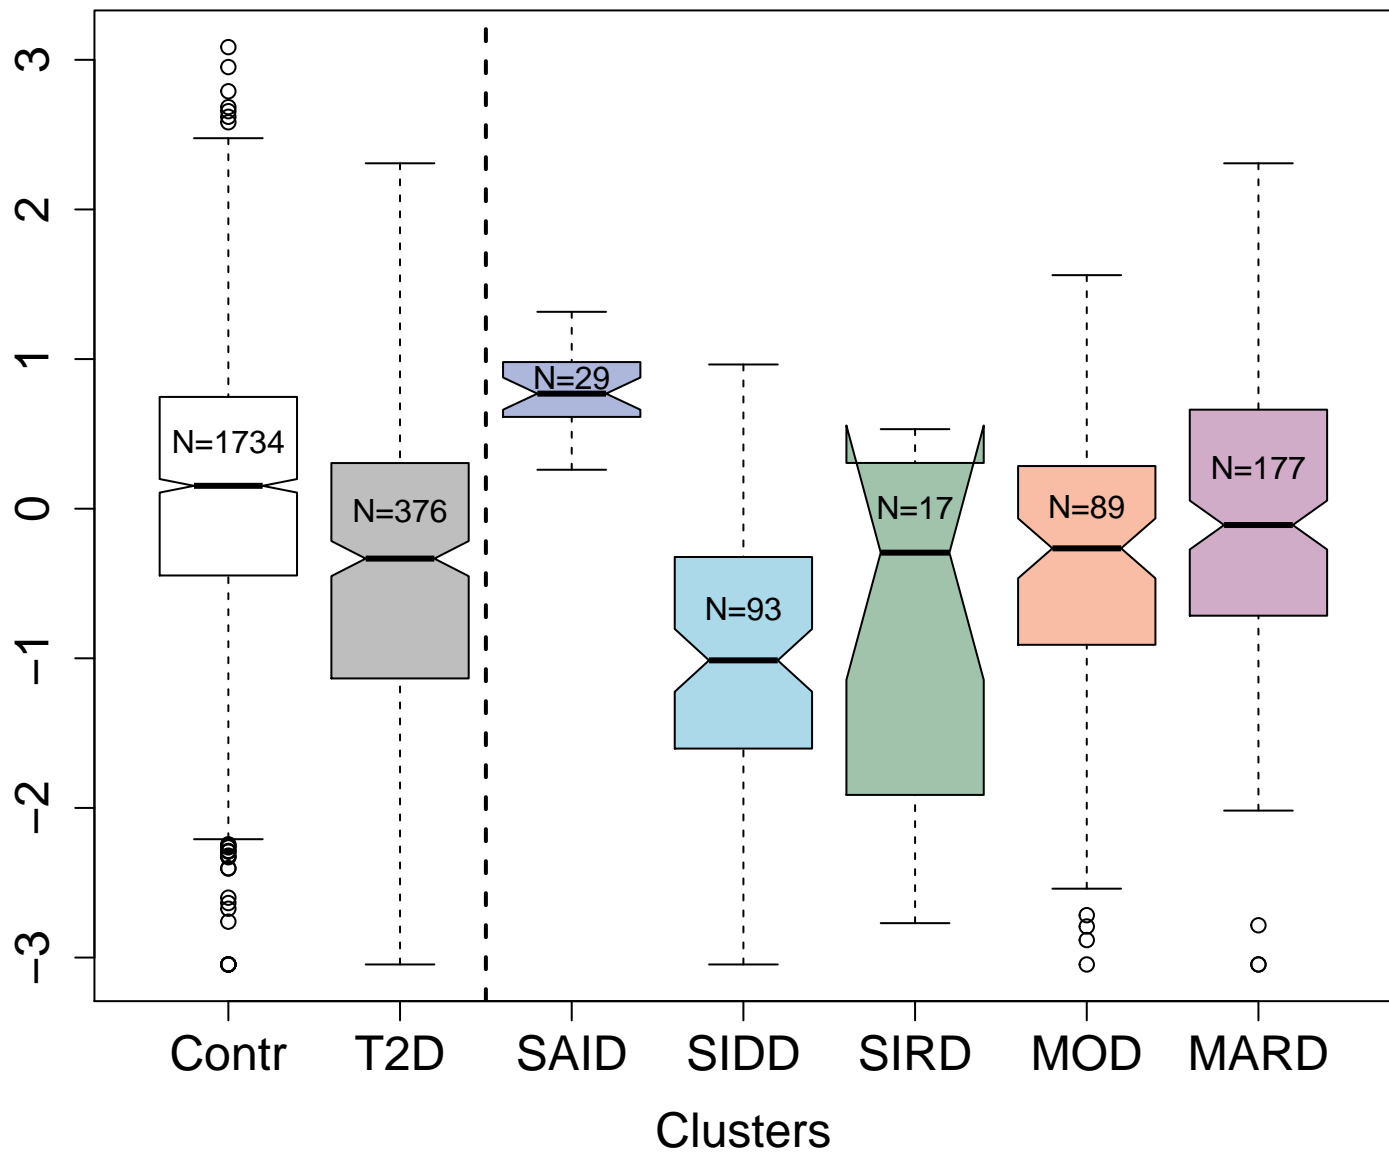

M63899 : X - 25948

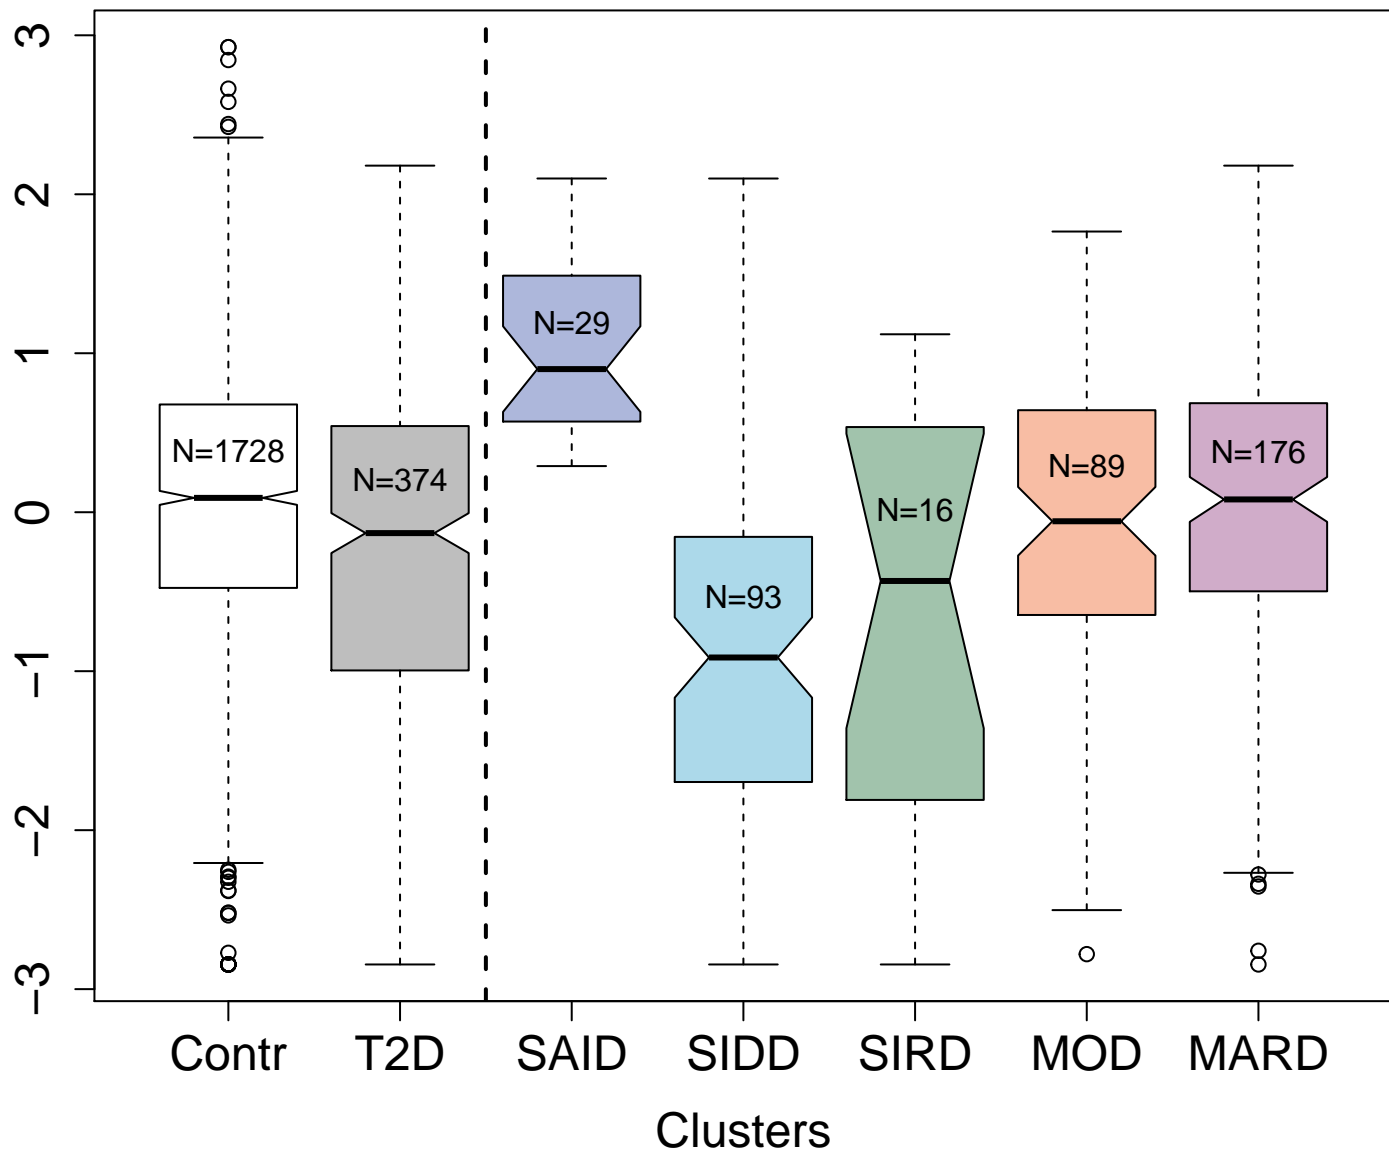

M53031 : methylsuccinoylcarnitine

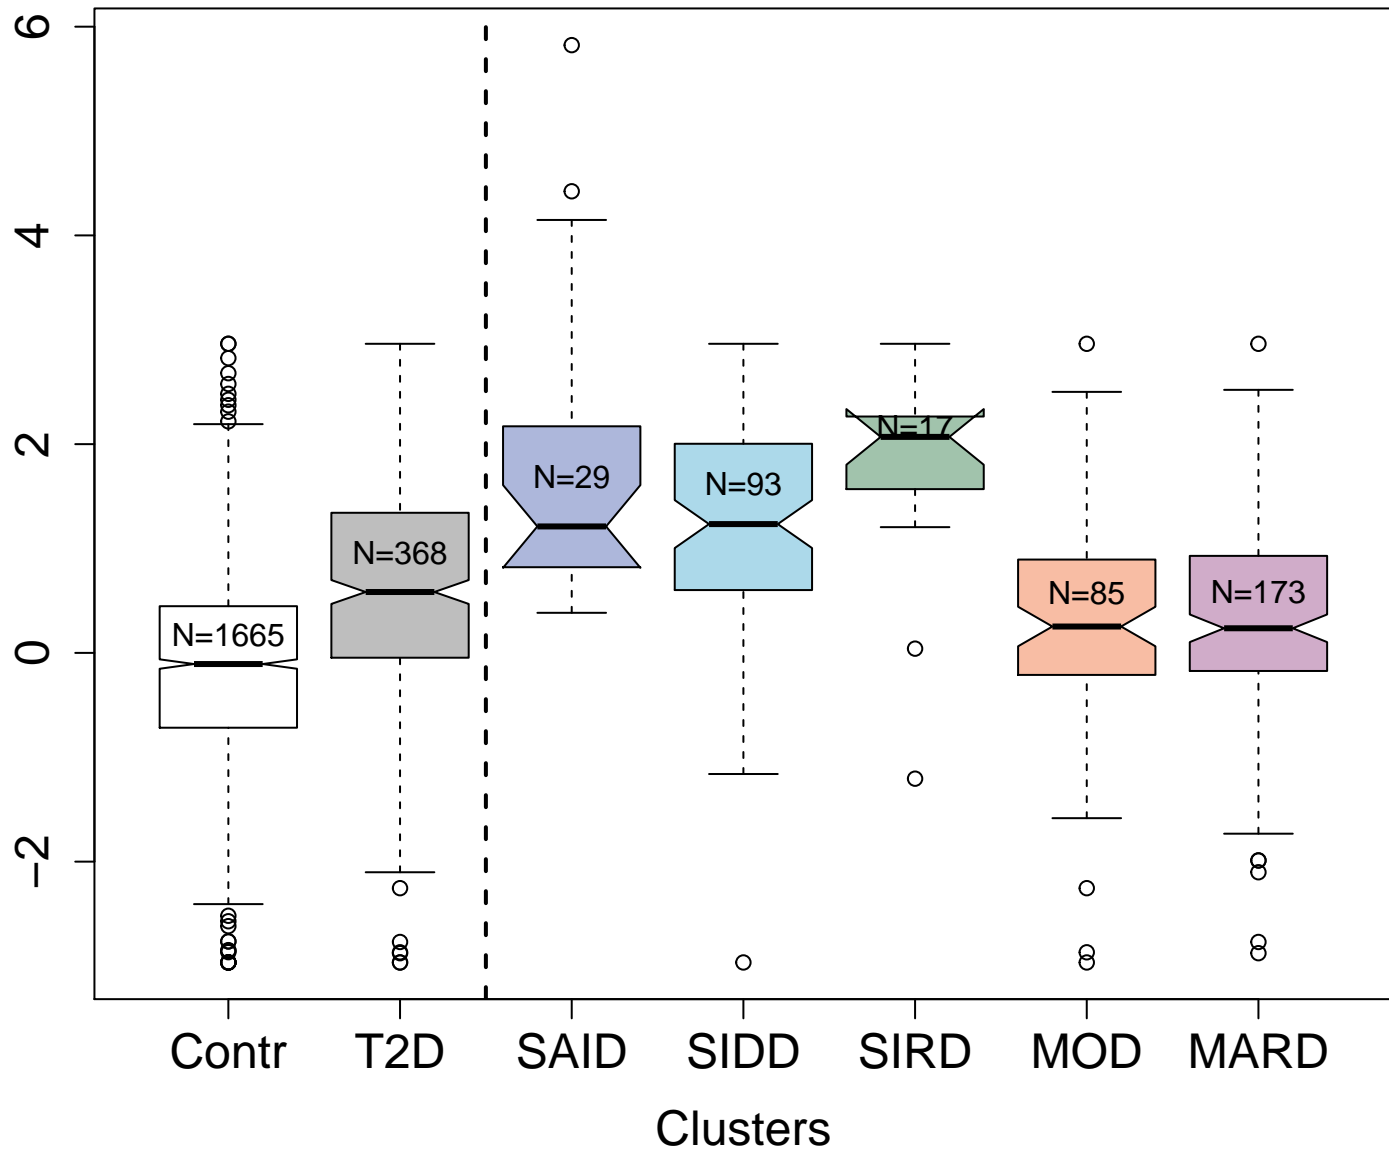

M46144 : methyl glucopyranoside (alpha + beta)

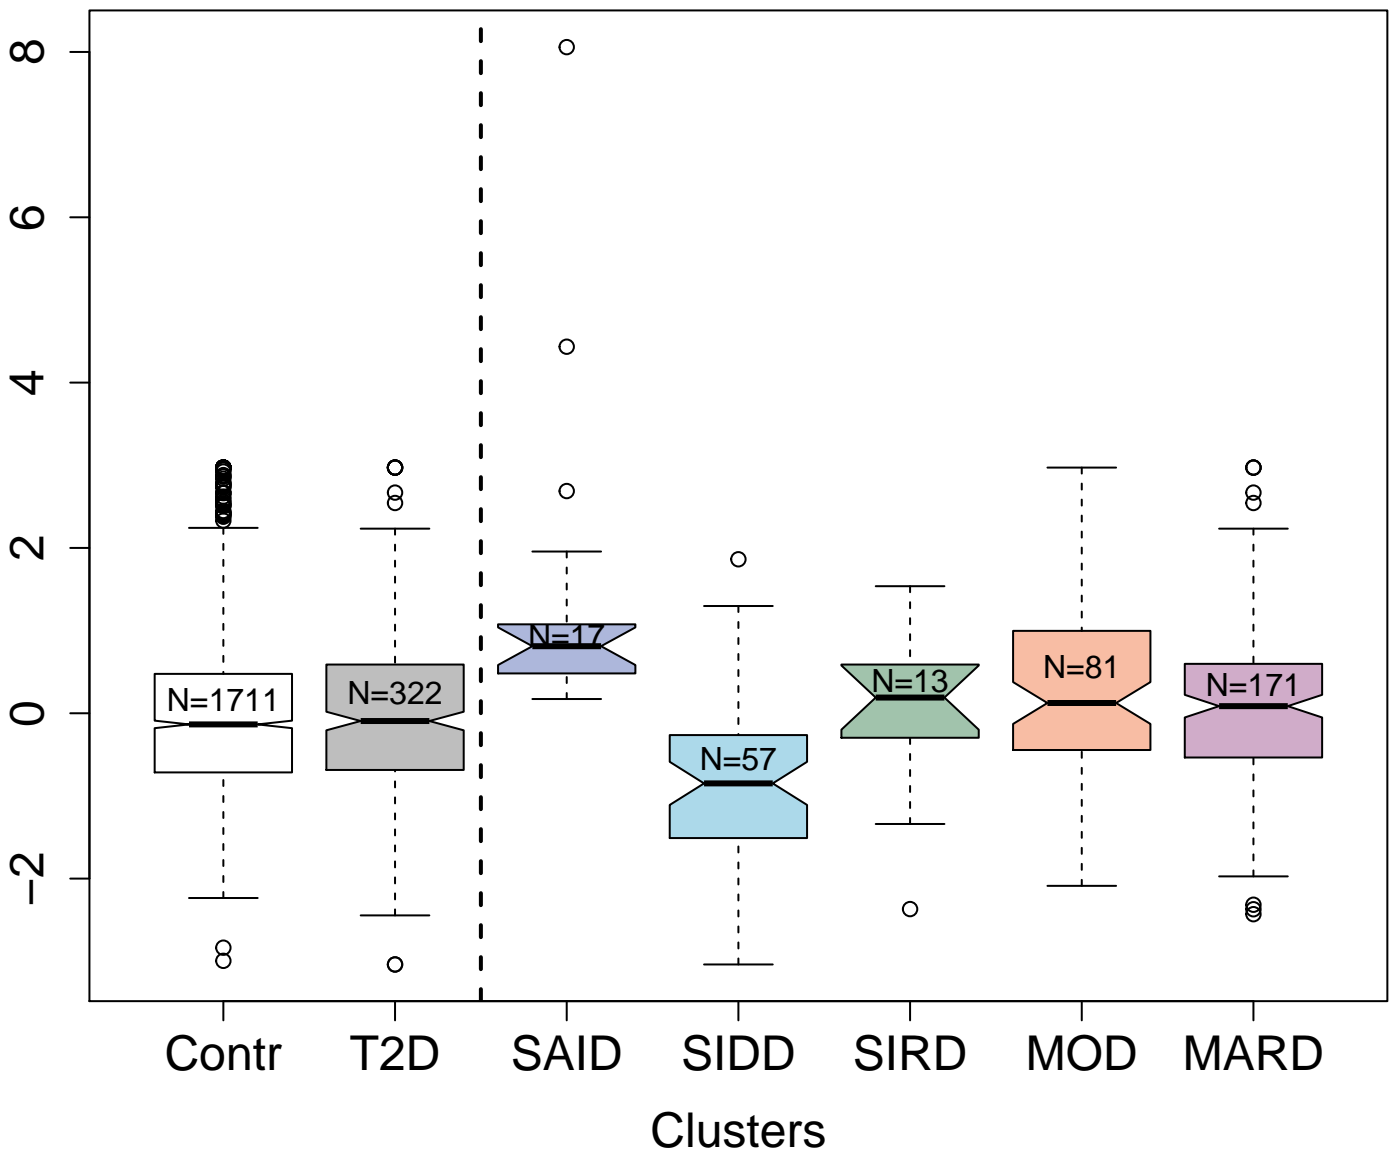

M12017 : 3-methoxytyrosine

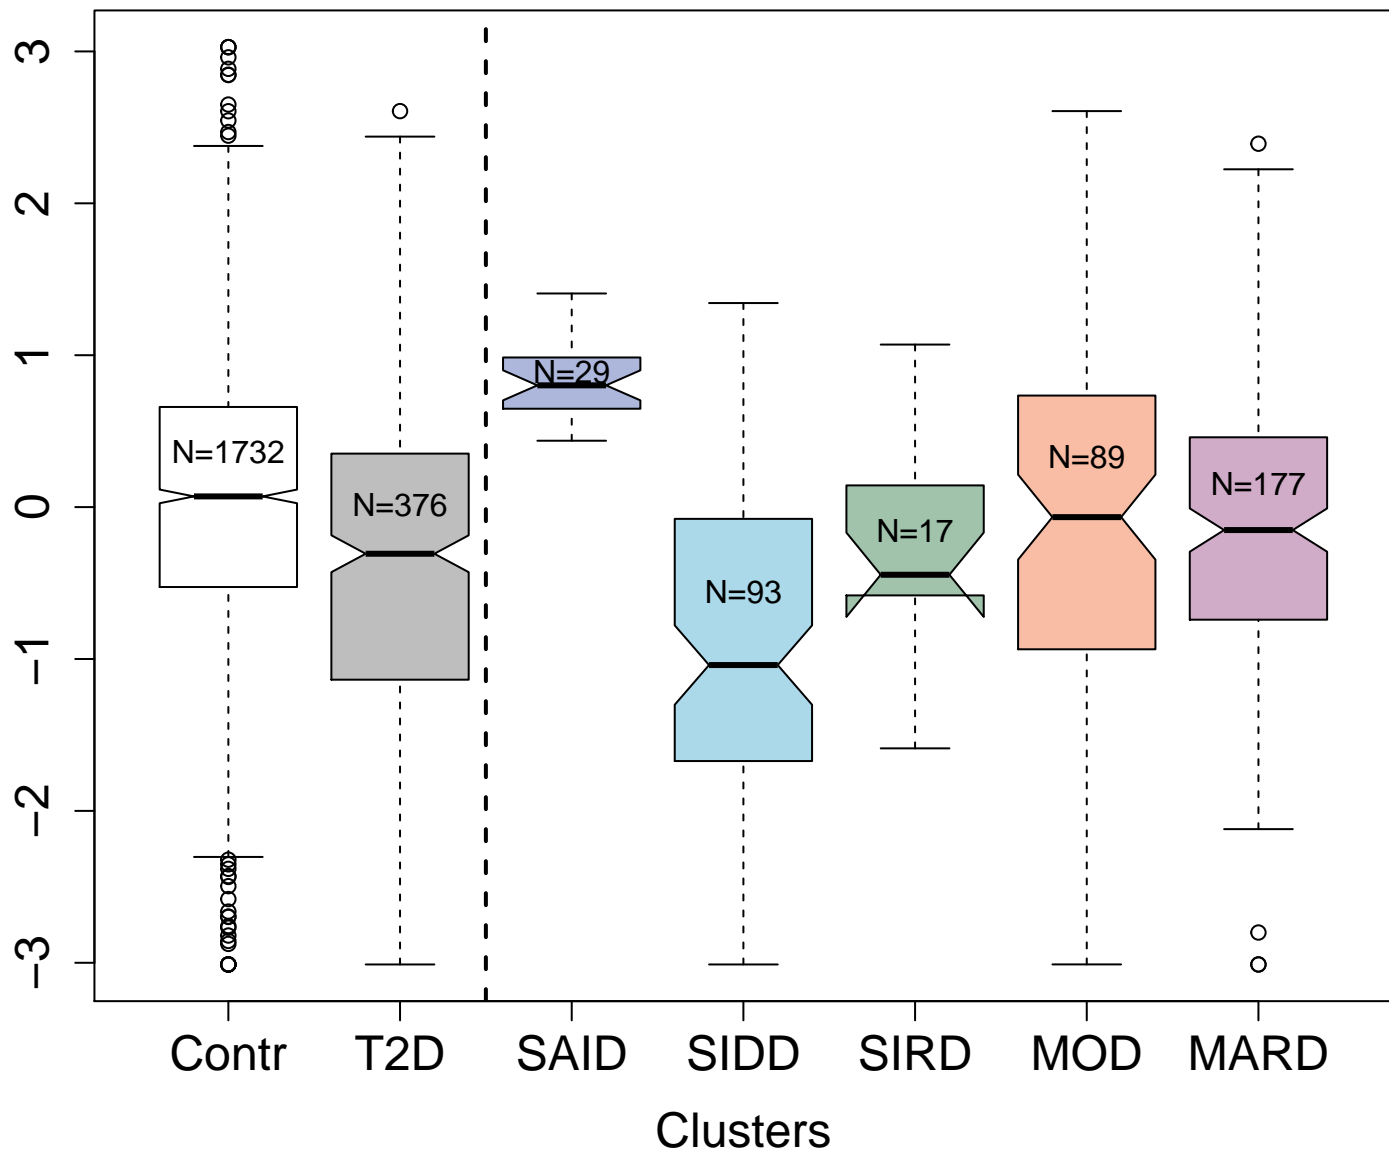

M43847 : glycerol 3-phosphate

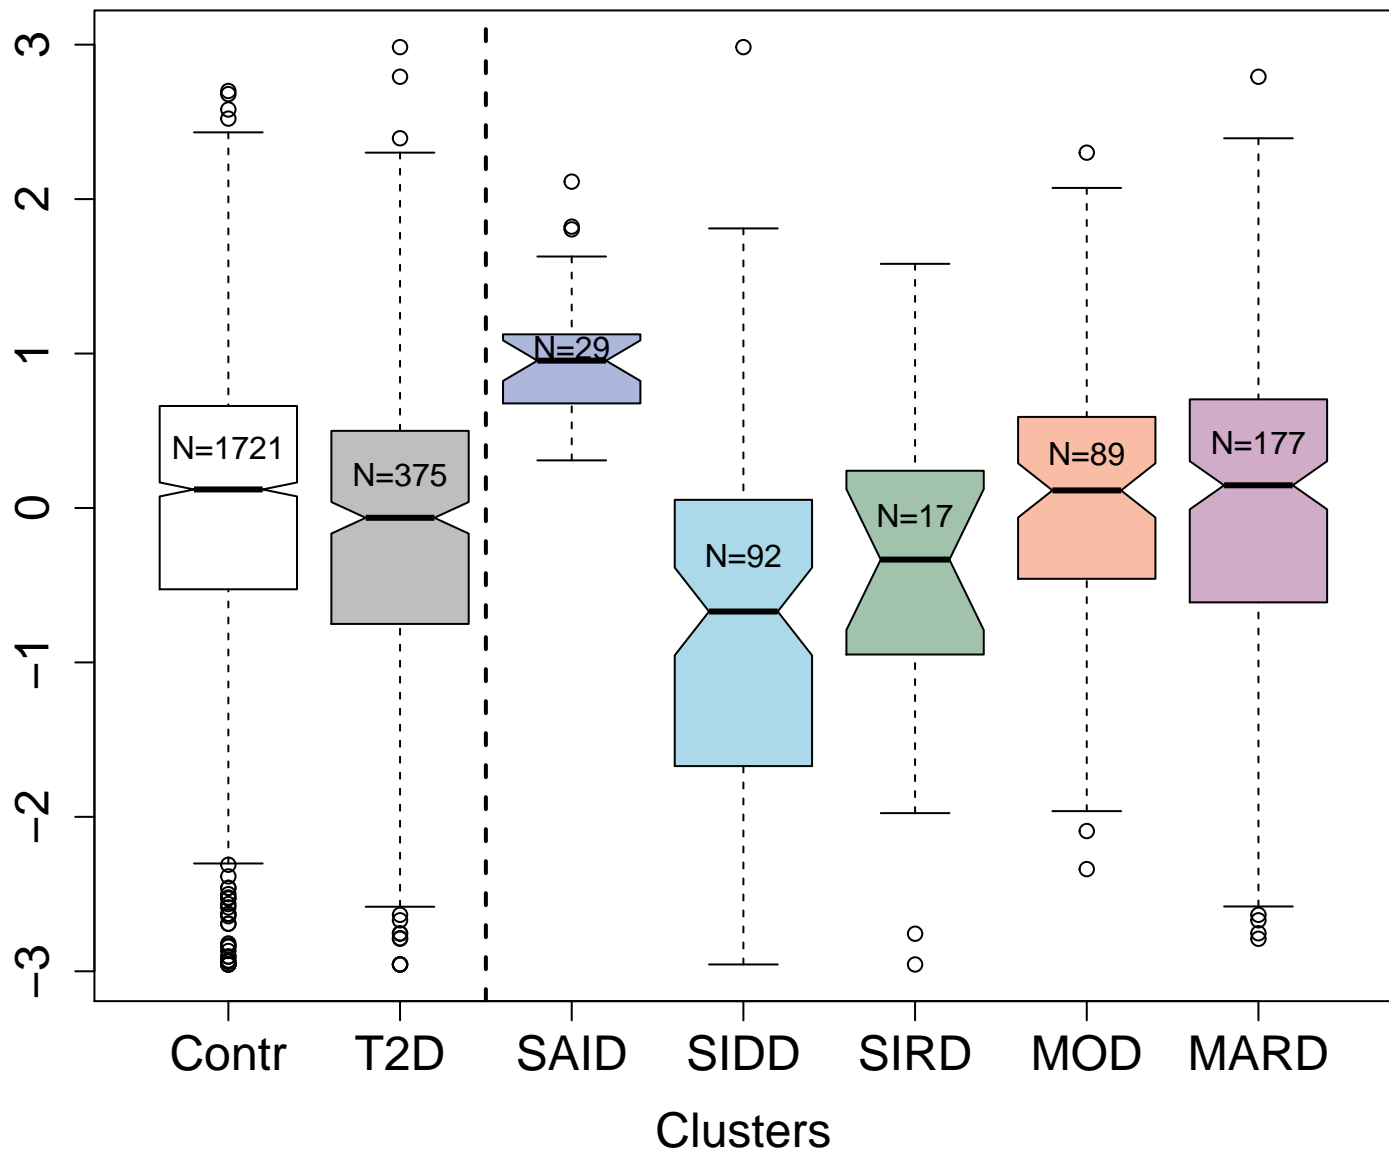



M49592 : X - 11315

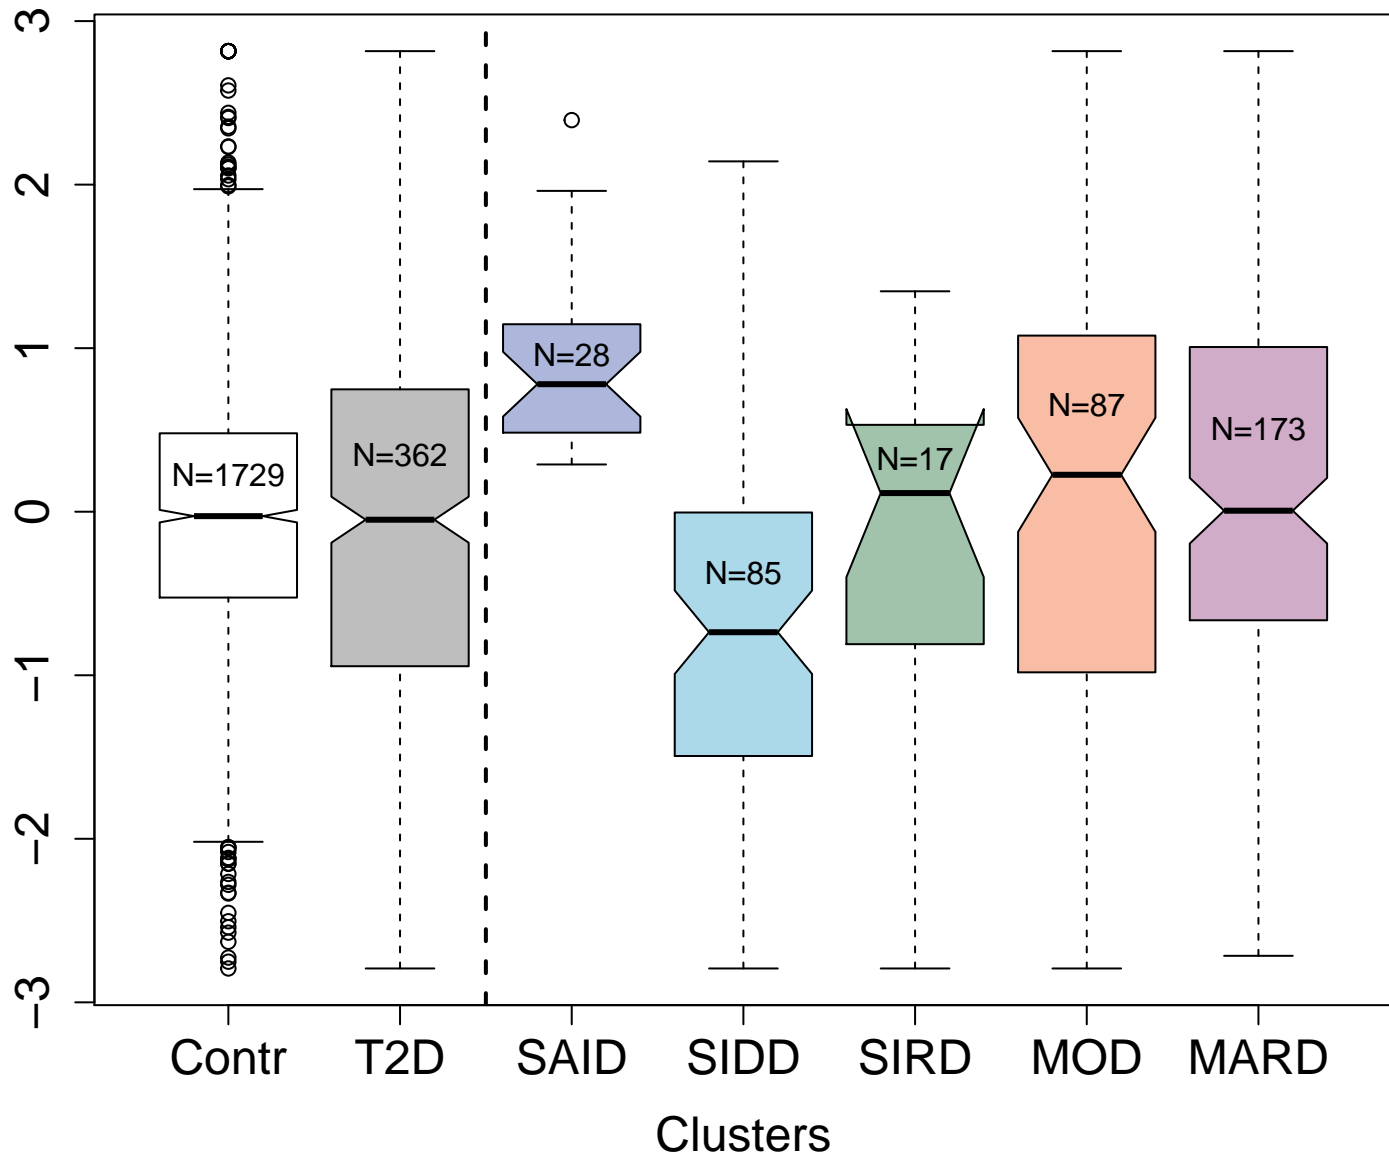

M46227 : fructosyllysine

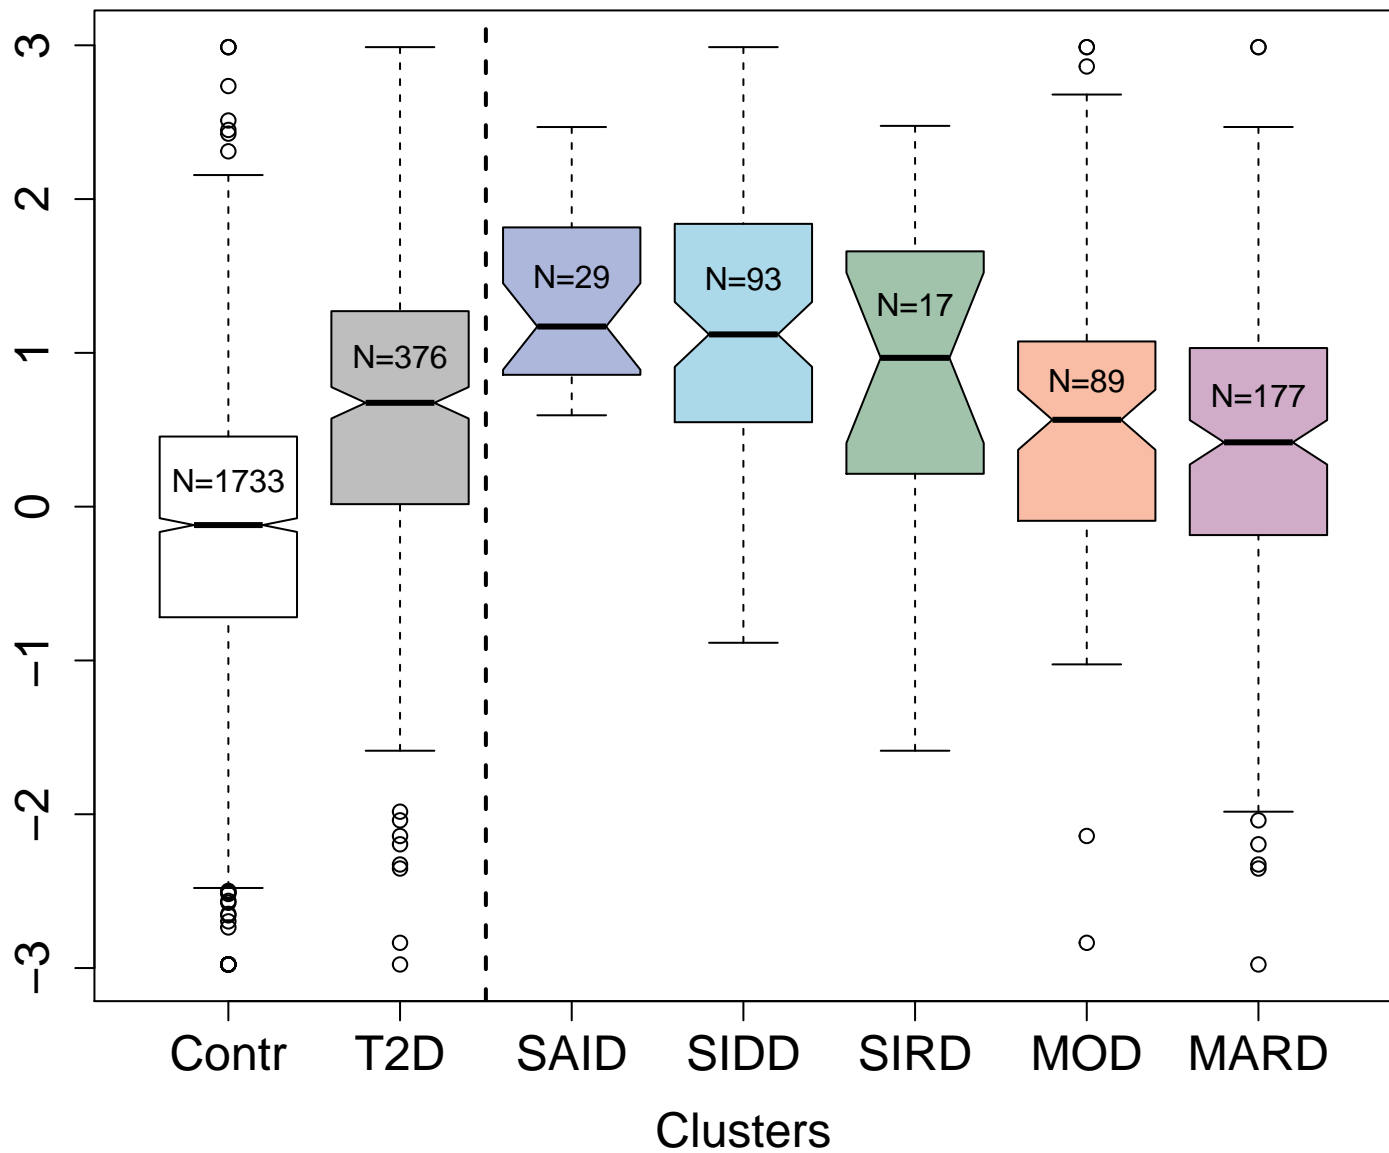

M33364 : gamma-glutamylthreonine

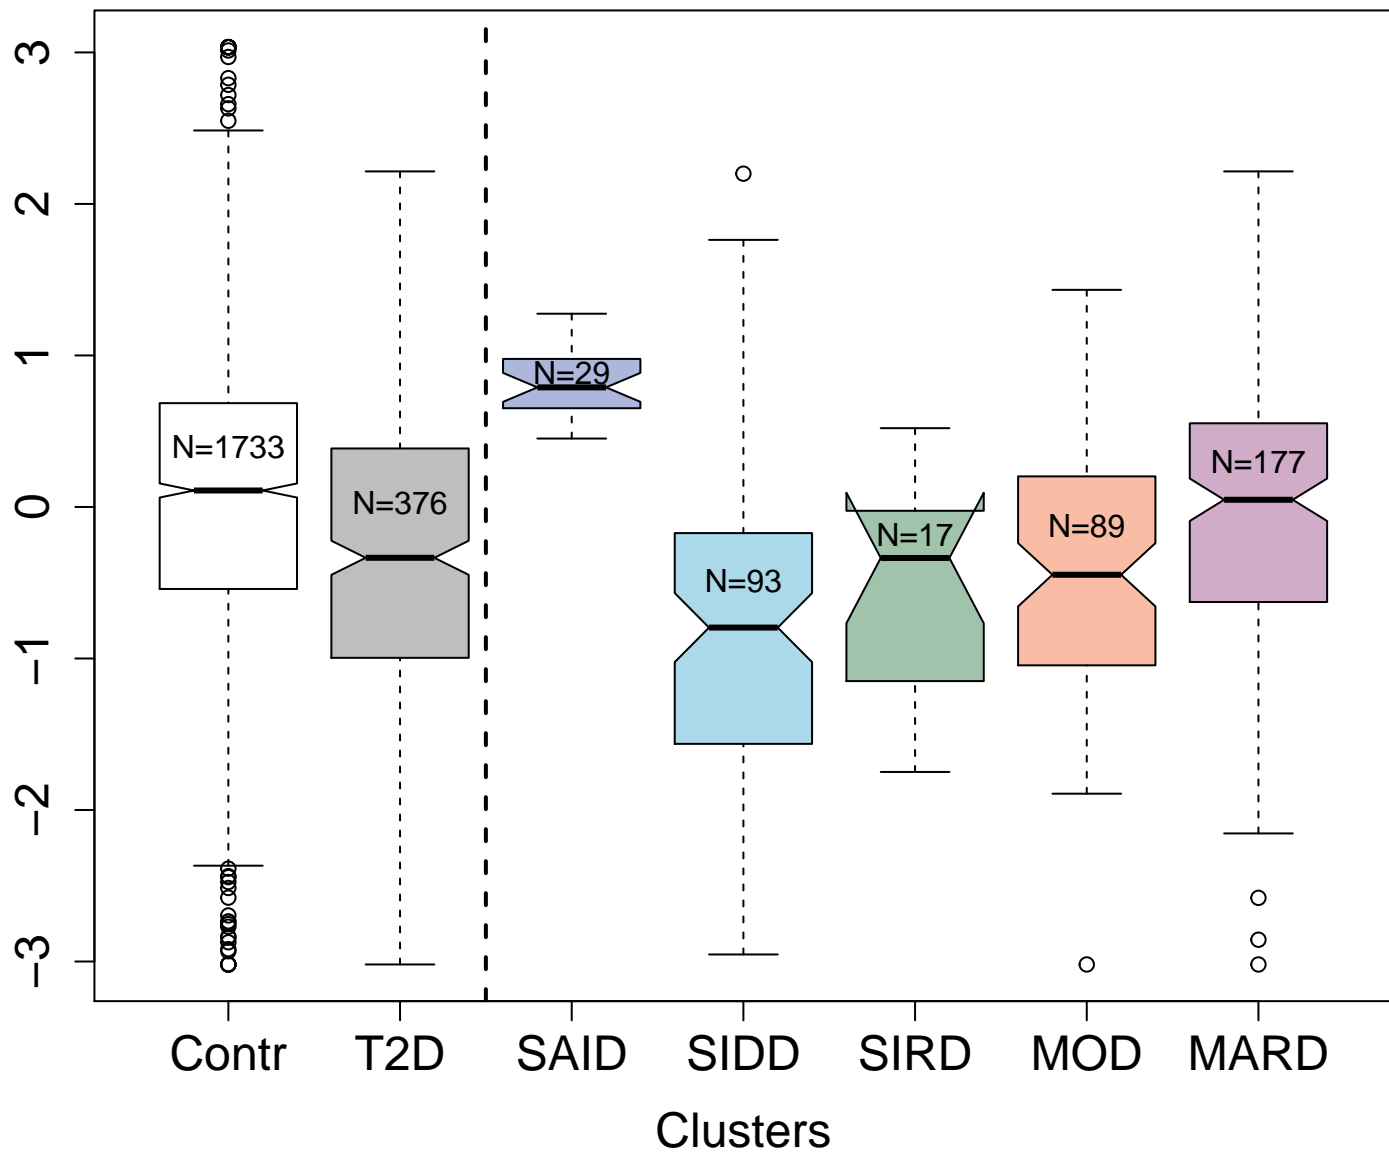

M63634 : X - 25828

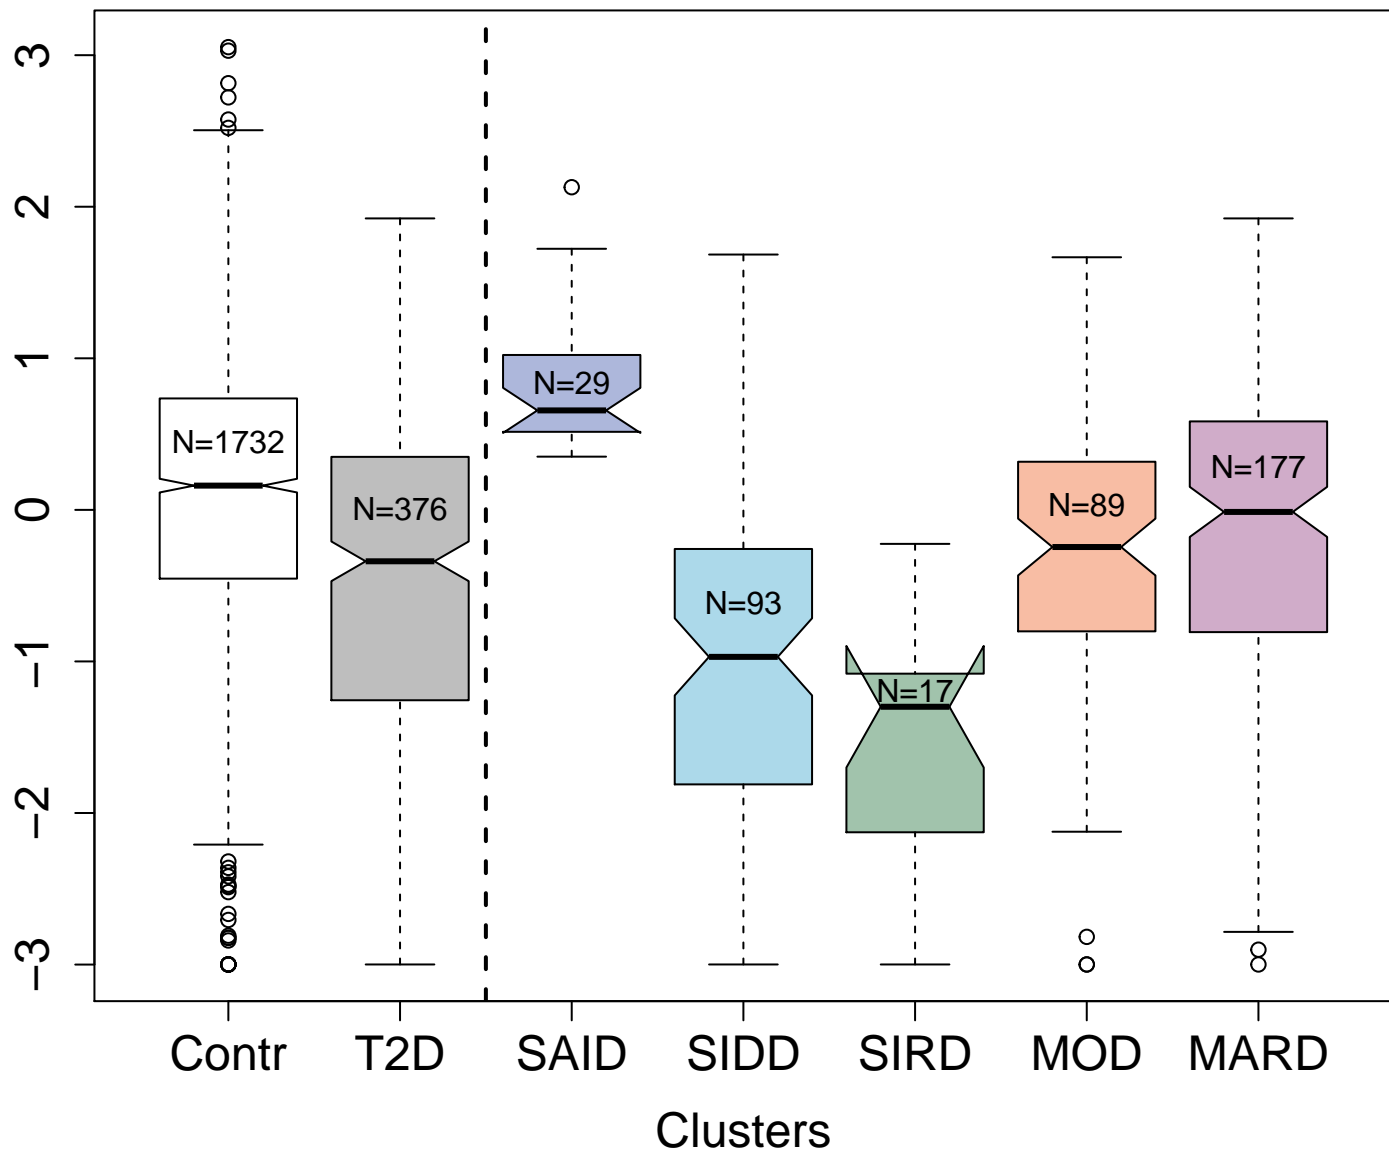

M53 : glutamine

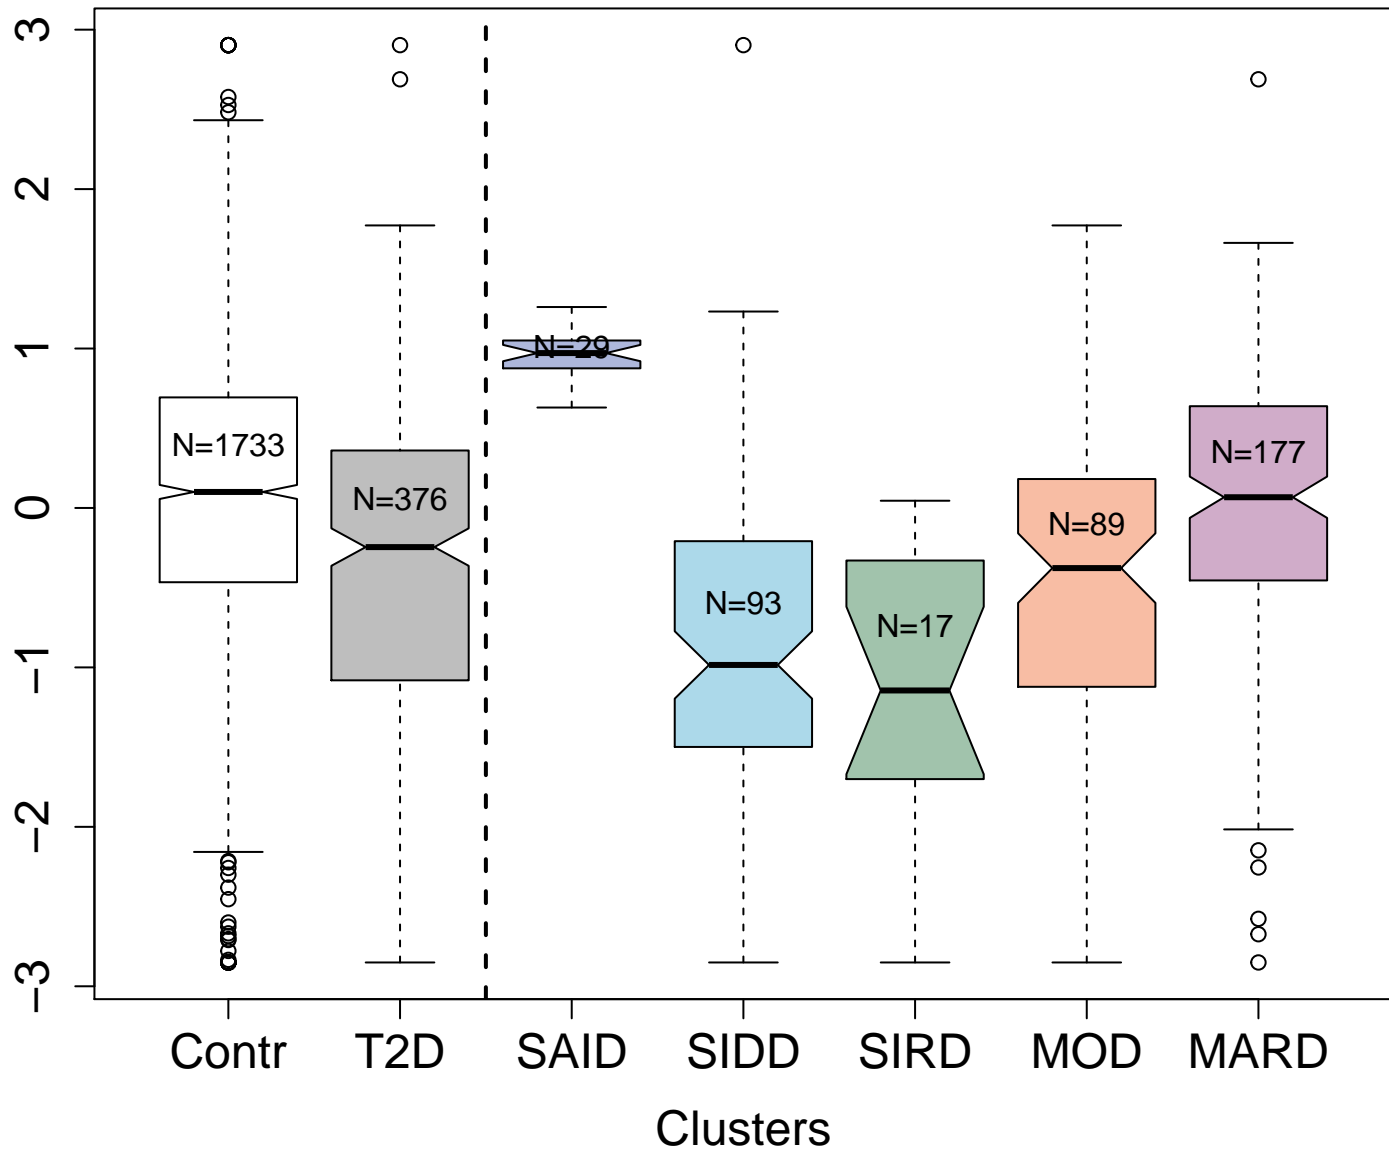

M4968 : alpha-ketobutyrate

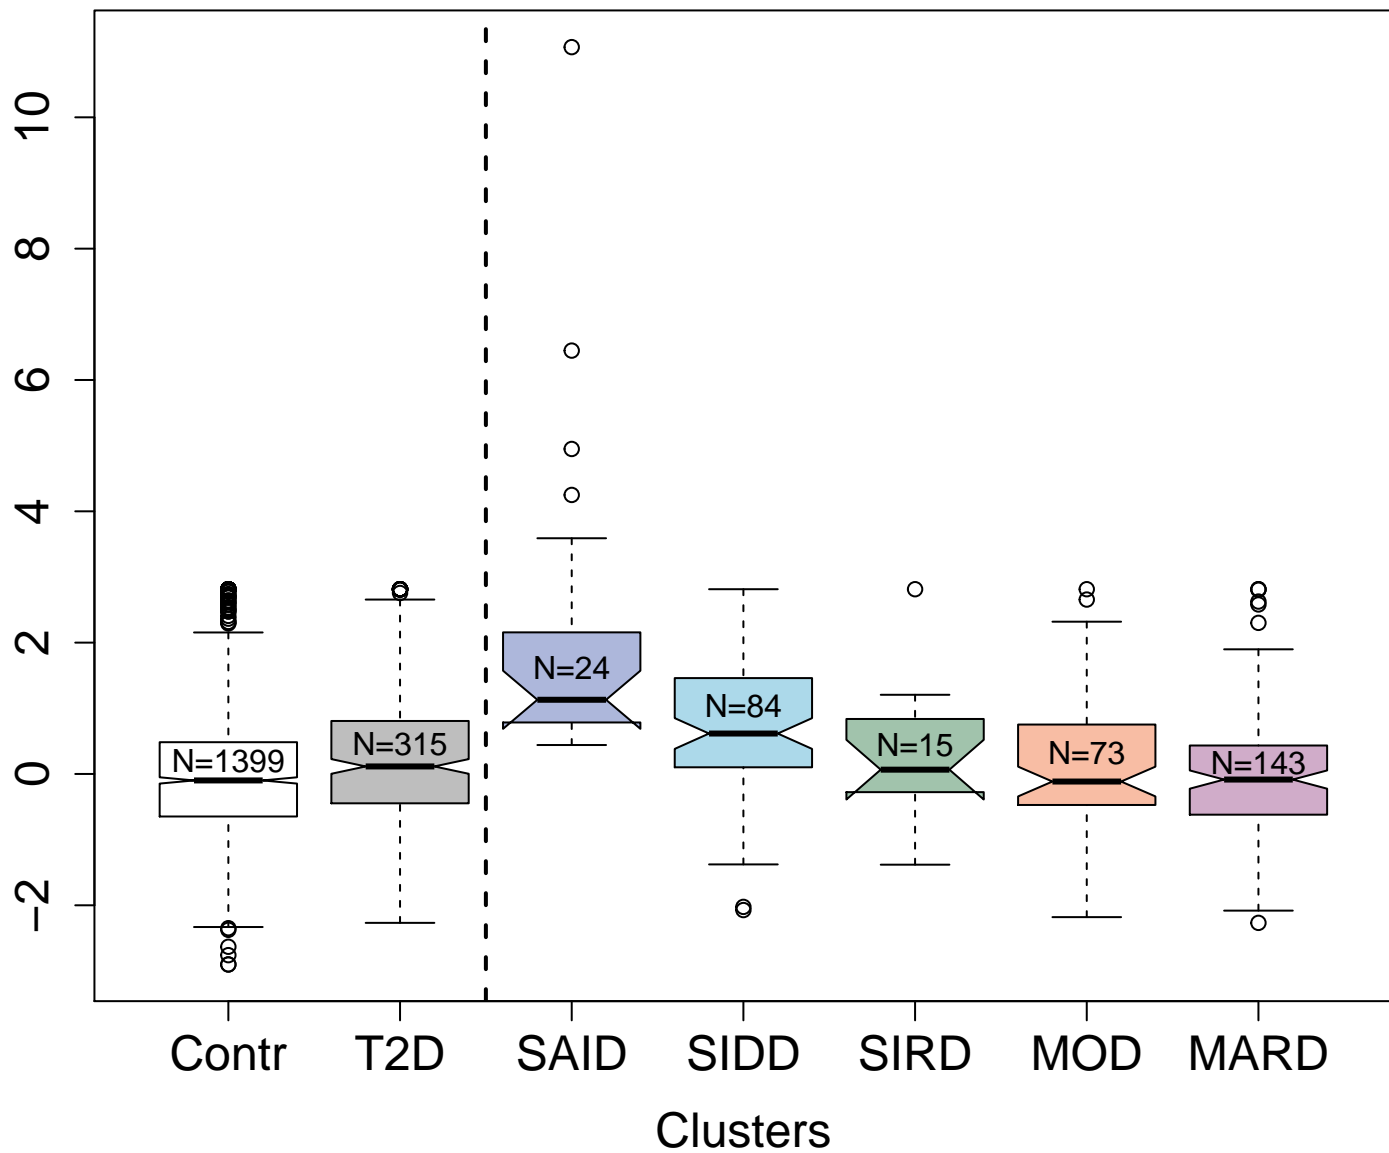

M44526 : 3-methyl-2-oxobutyrate

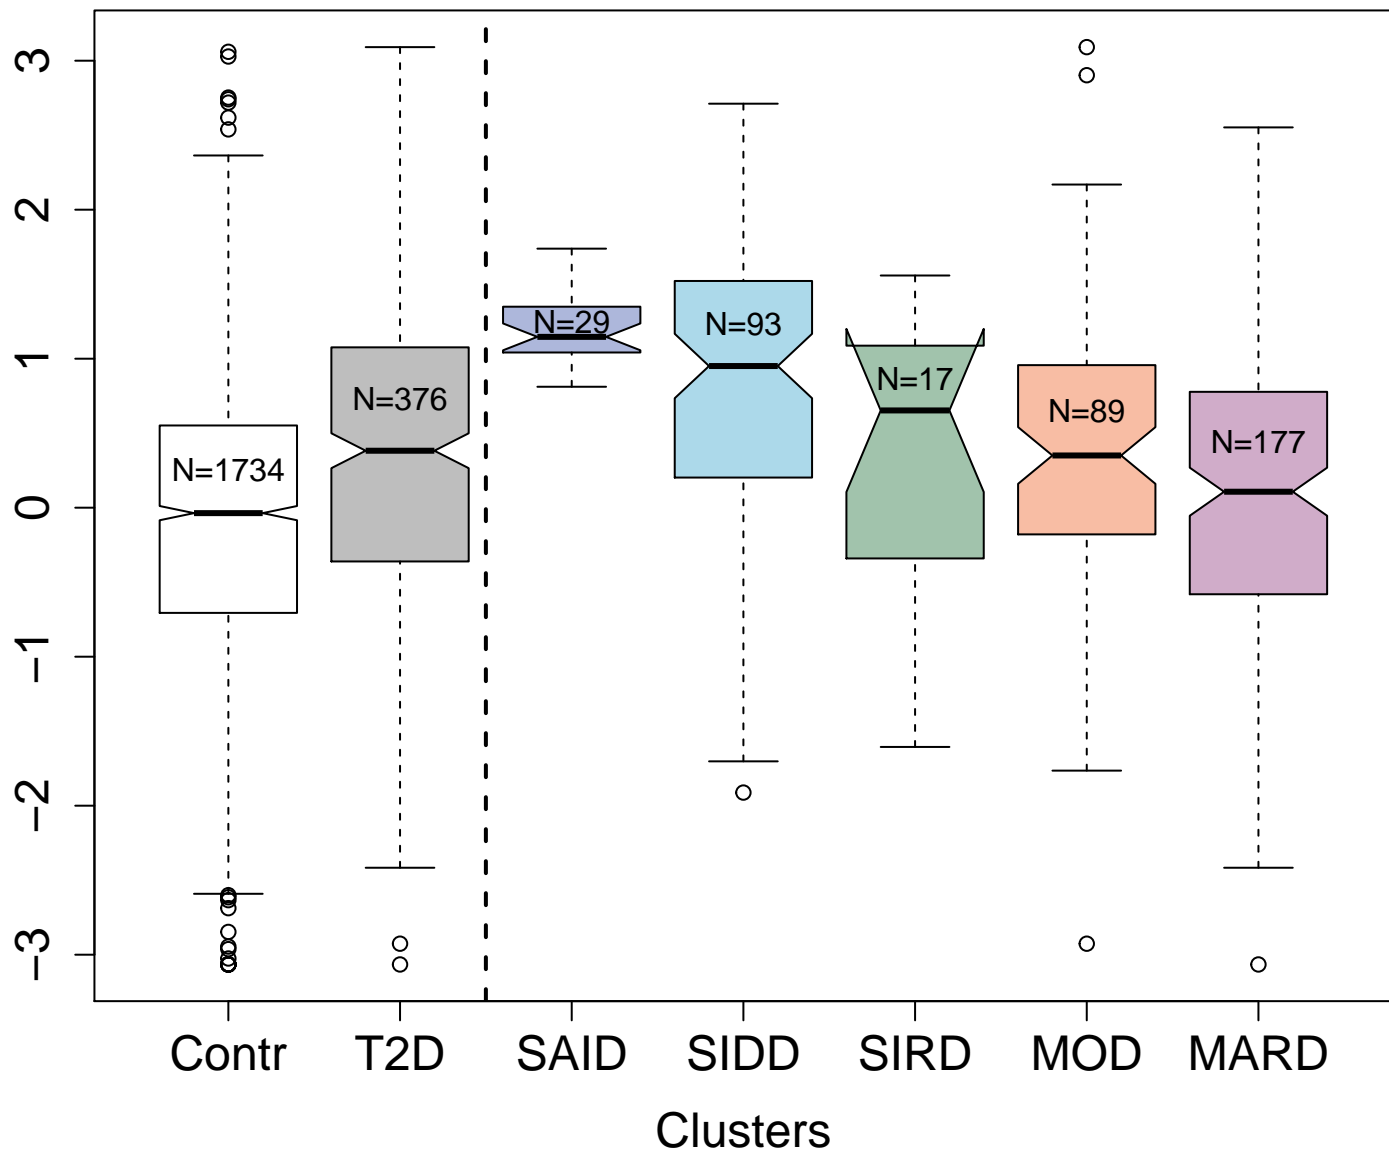

M33422 : gamma-glutamylphenylalanine

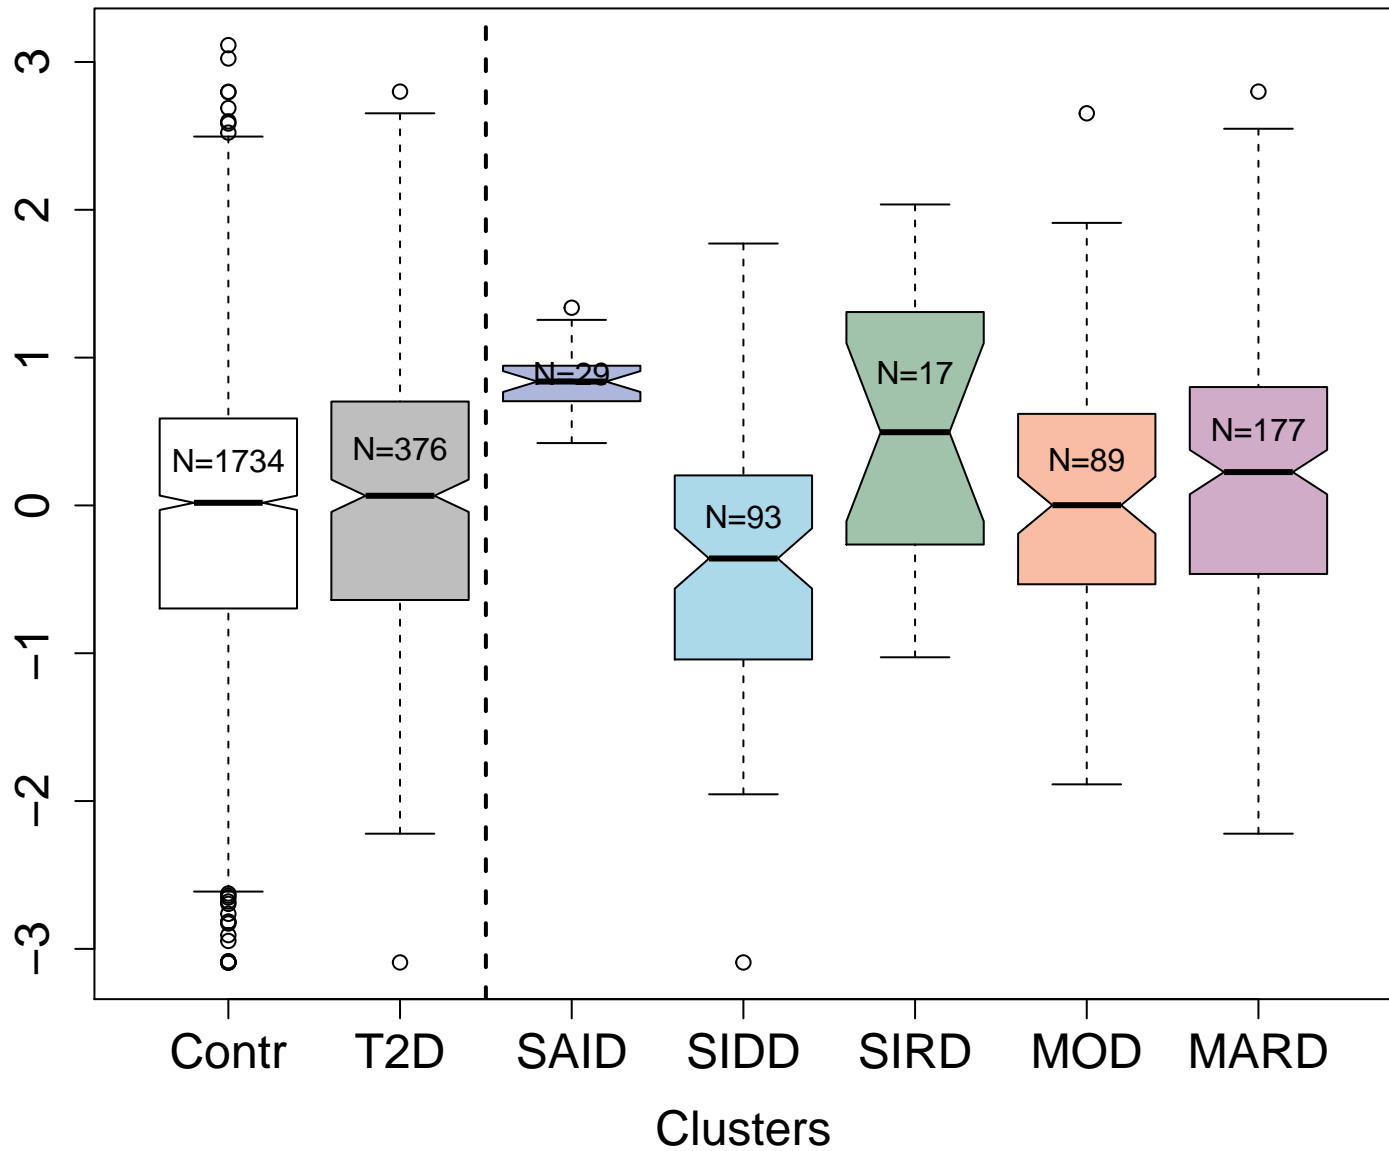



M42370 : S-1-pyrroline-5-carboxylate

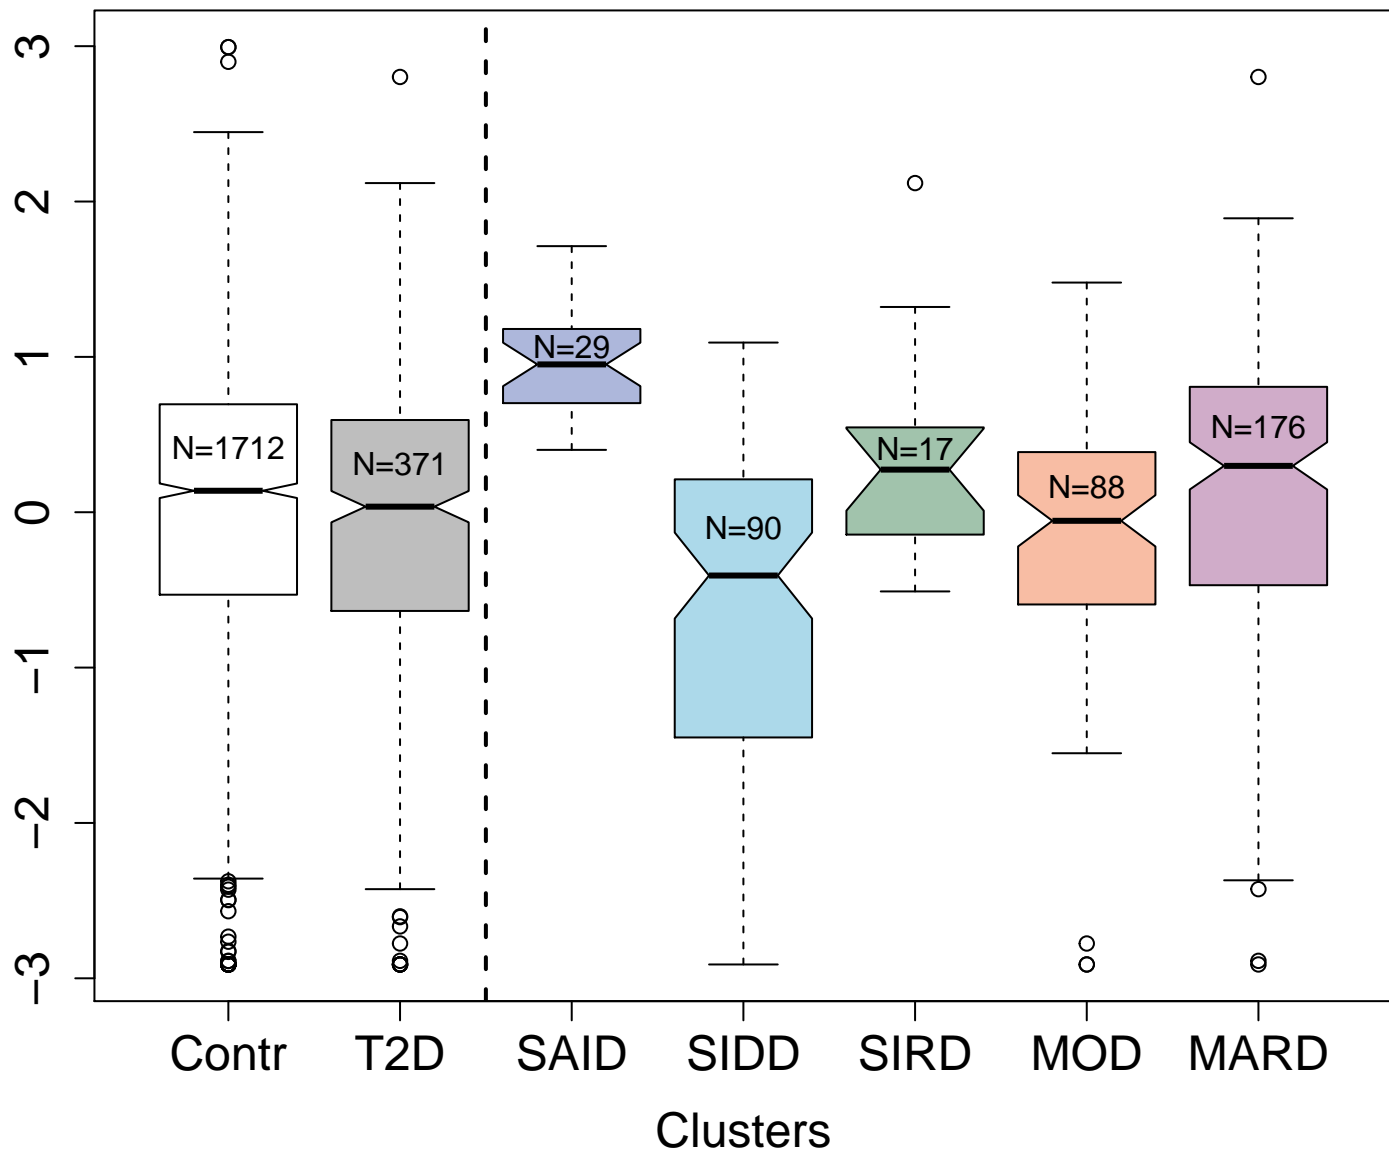

M2734 : gamma-glutamyltyrosine

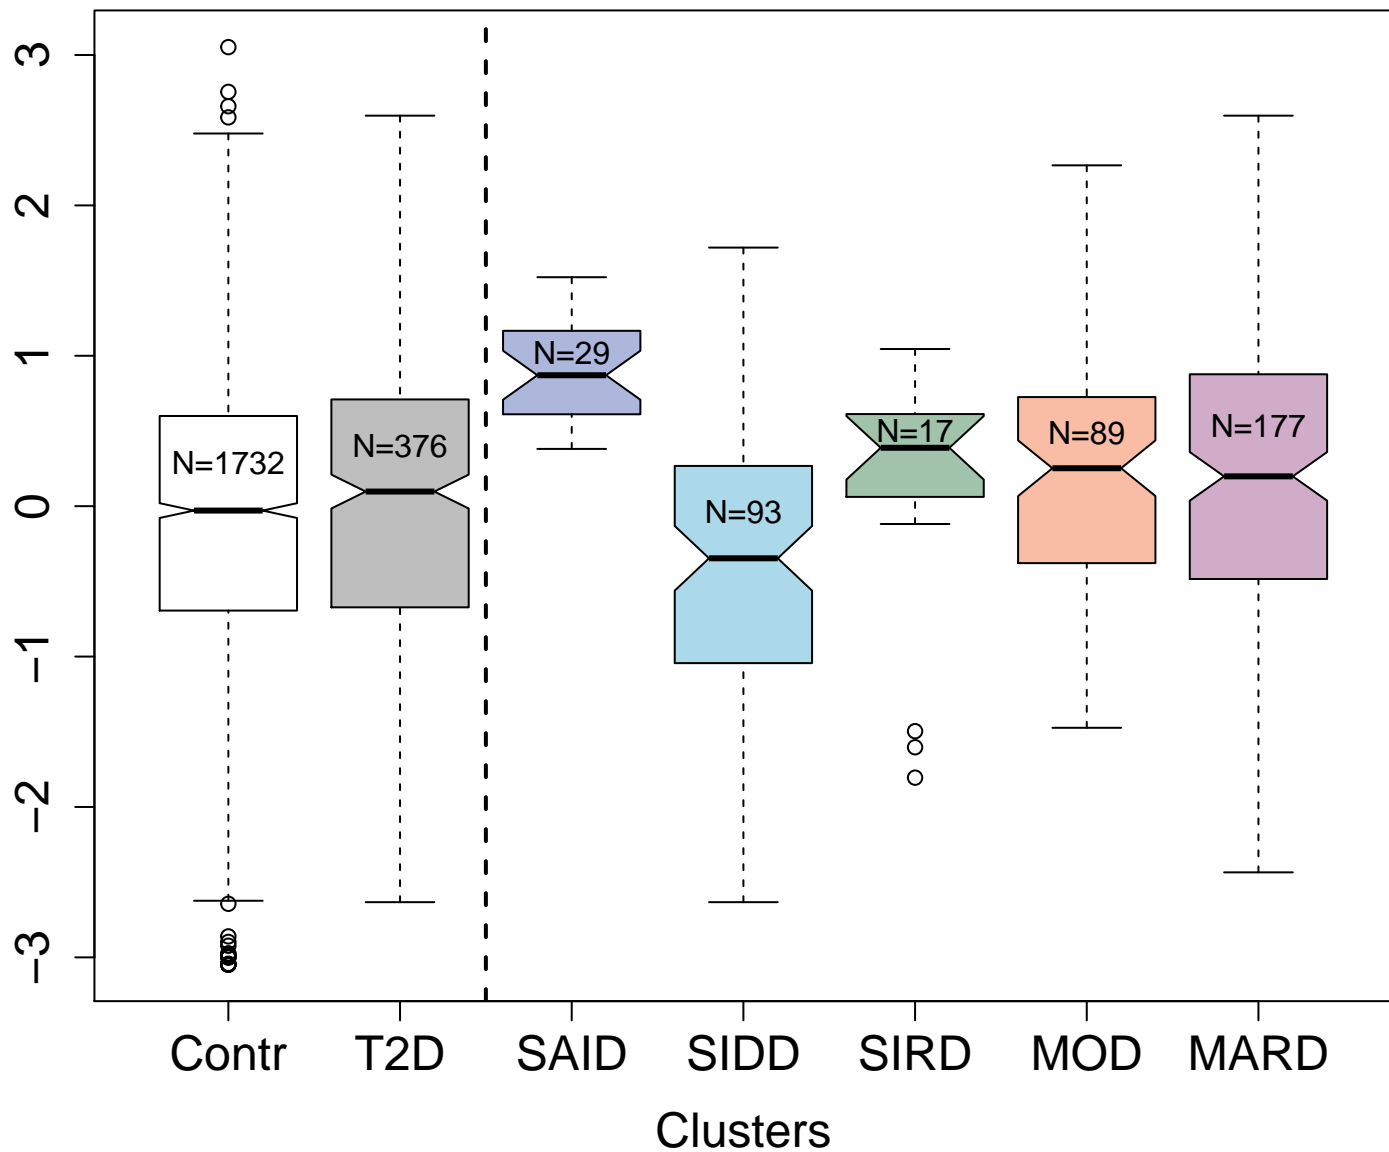

M33442 : pseudouridine

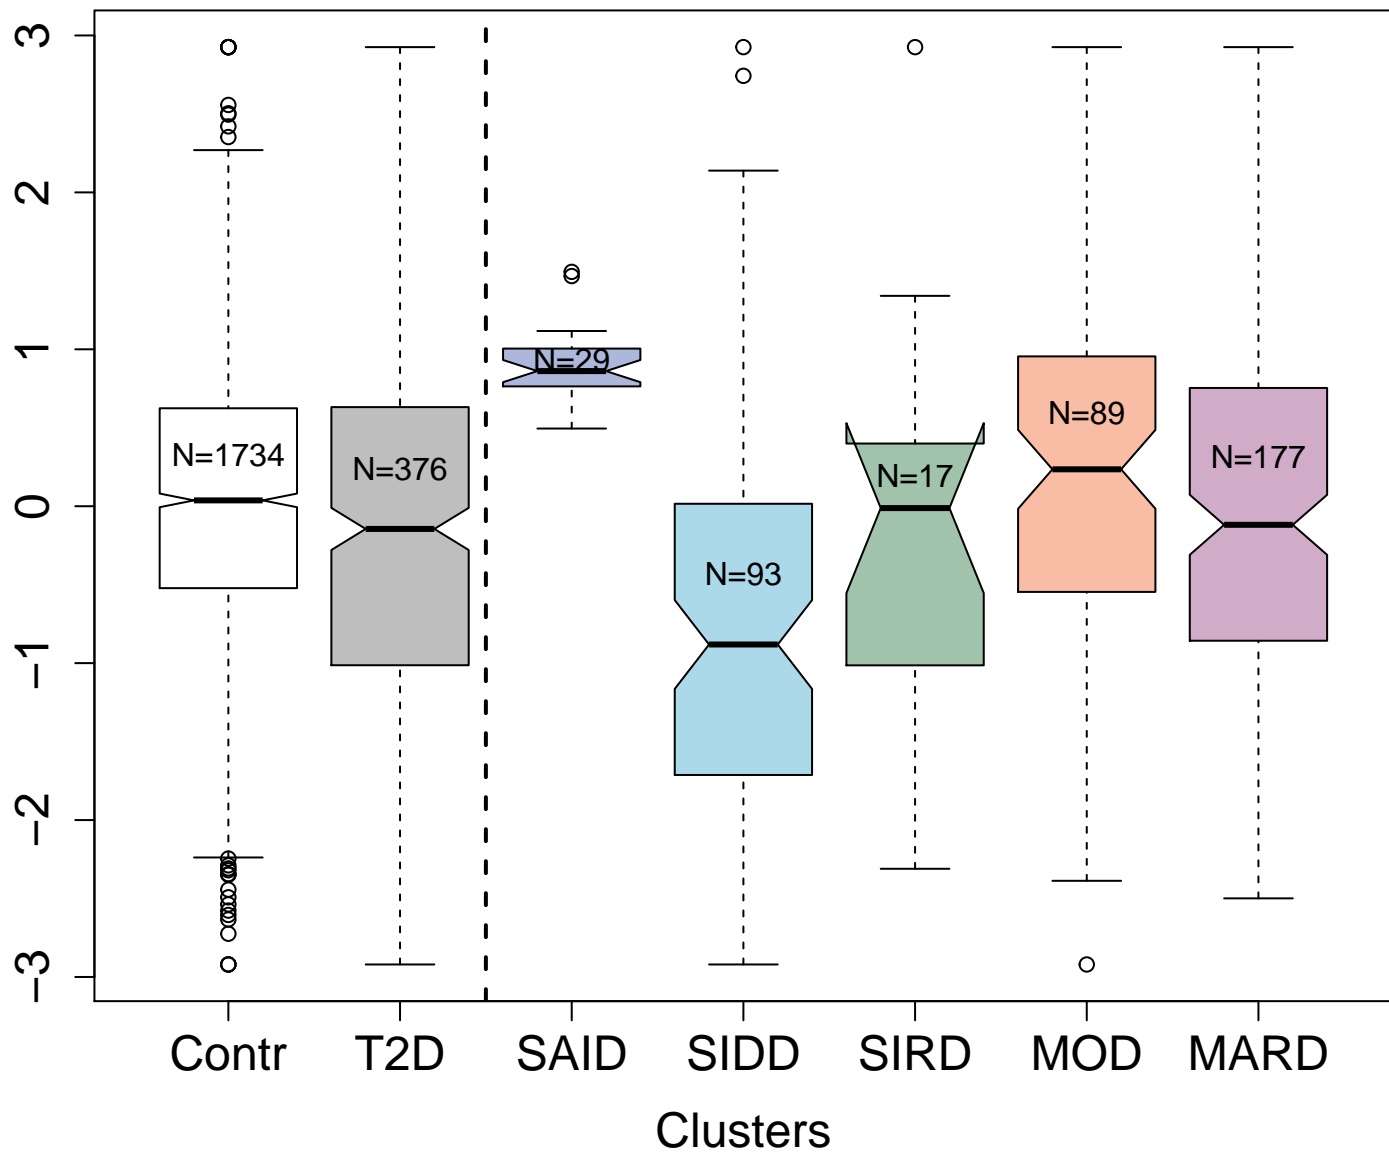

M2730 : gamma-glutamylglutamine

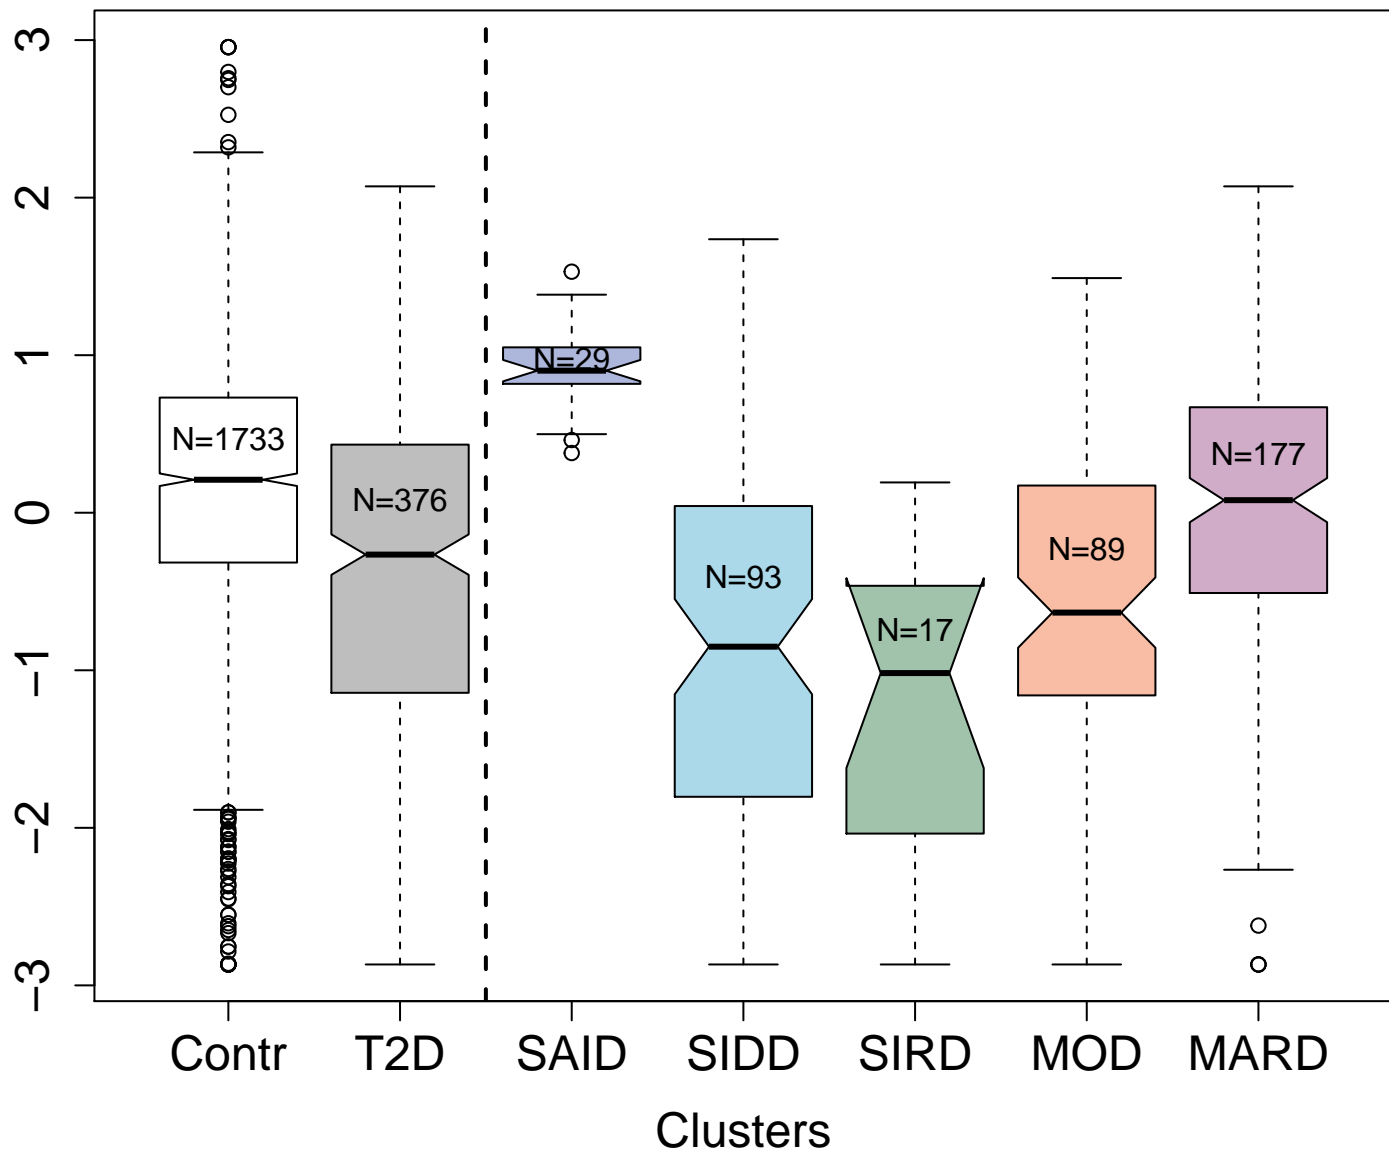

M57463 : inoleoylcholine\*

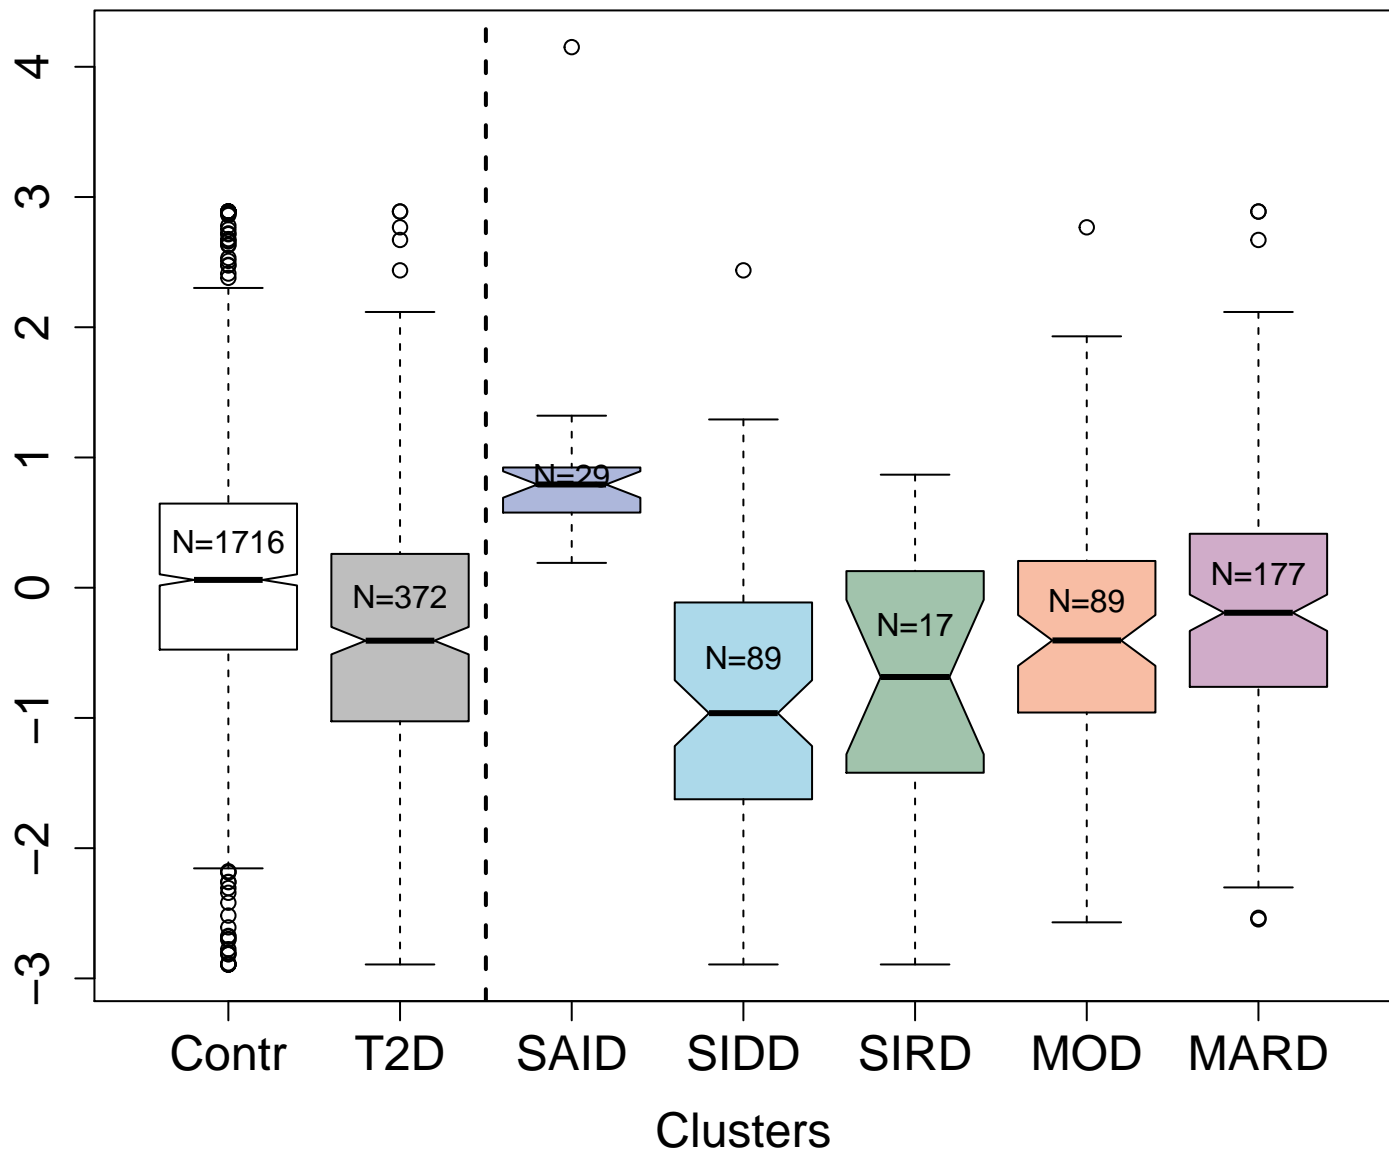

M22116 : 4-methyl-2-oxopentanoate

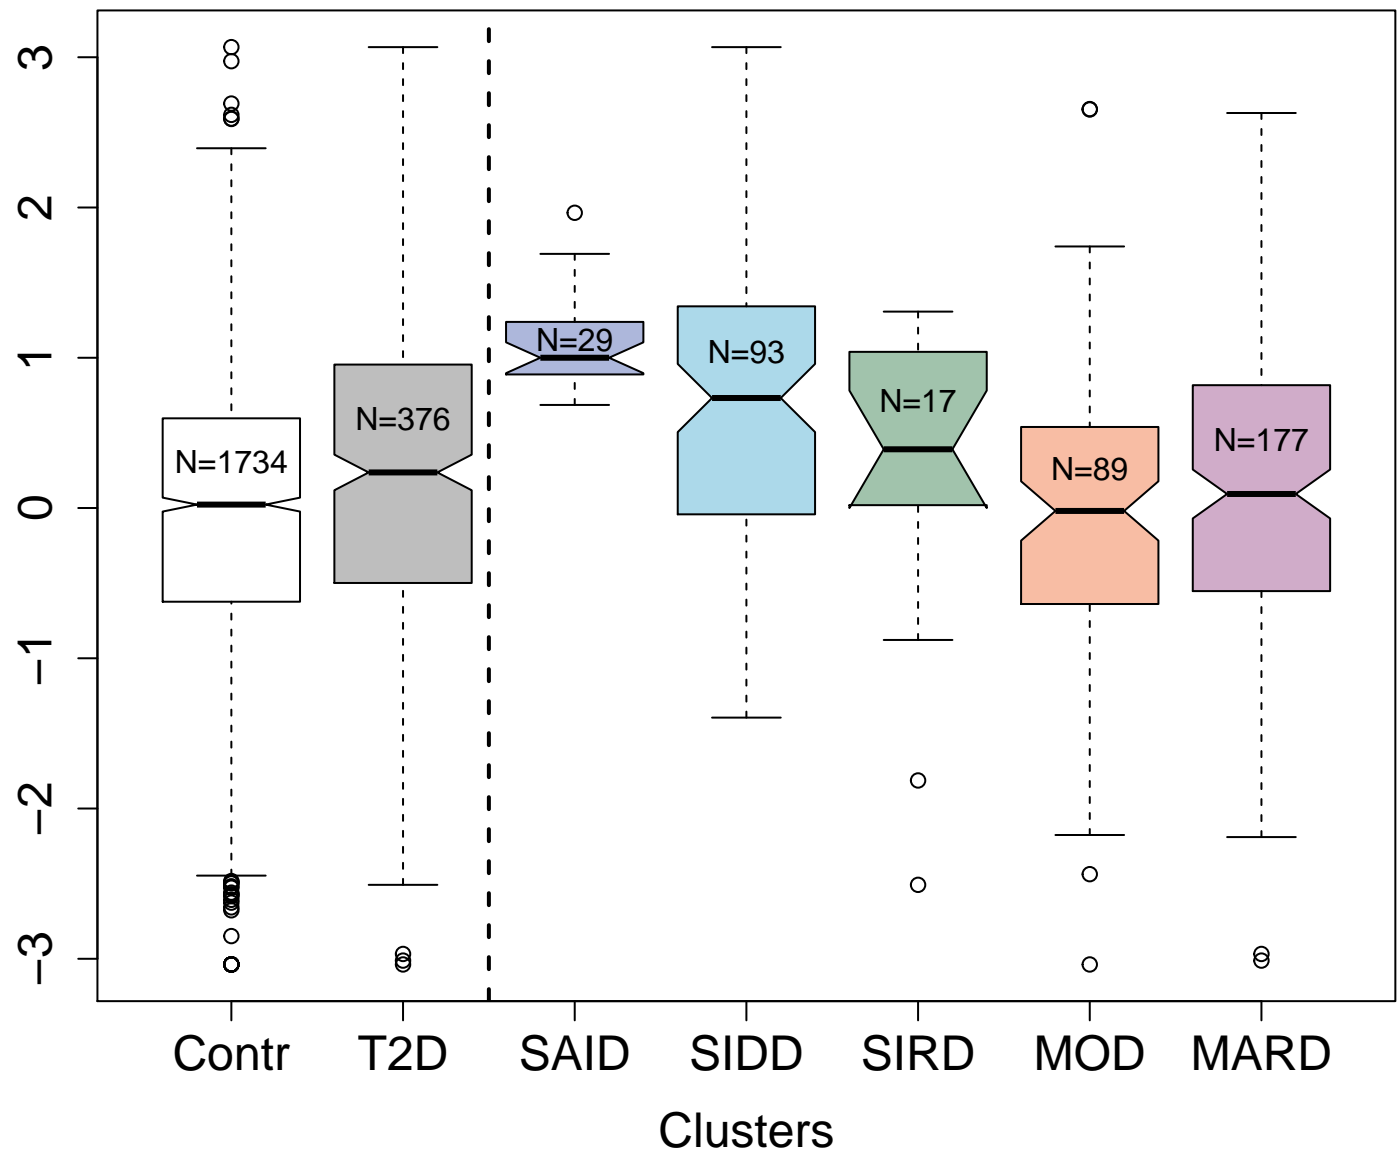

M42582 : pyruvate

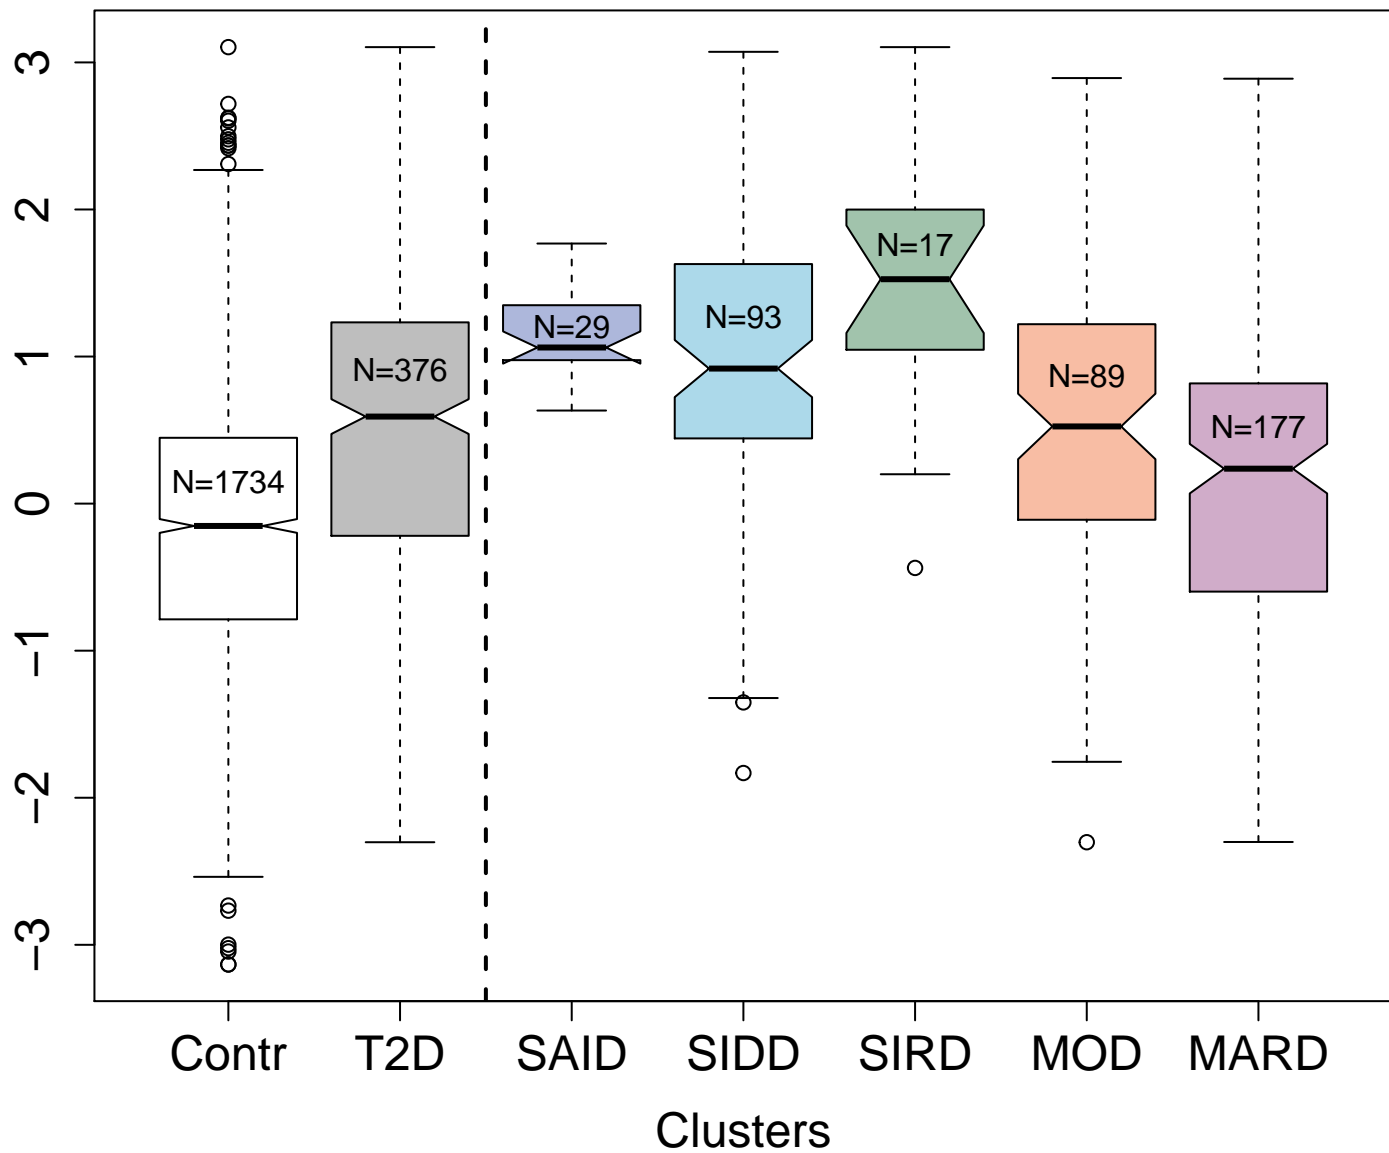

M1549 : 3-hydroxyisobutyrate

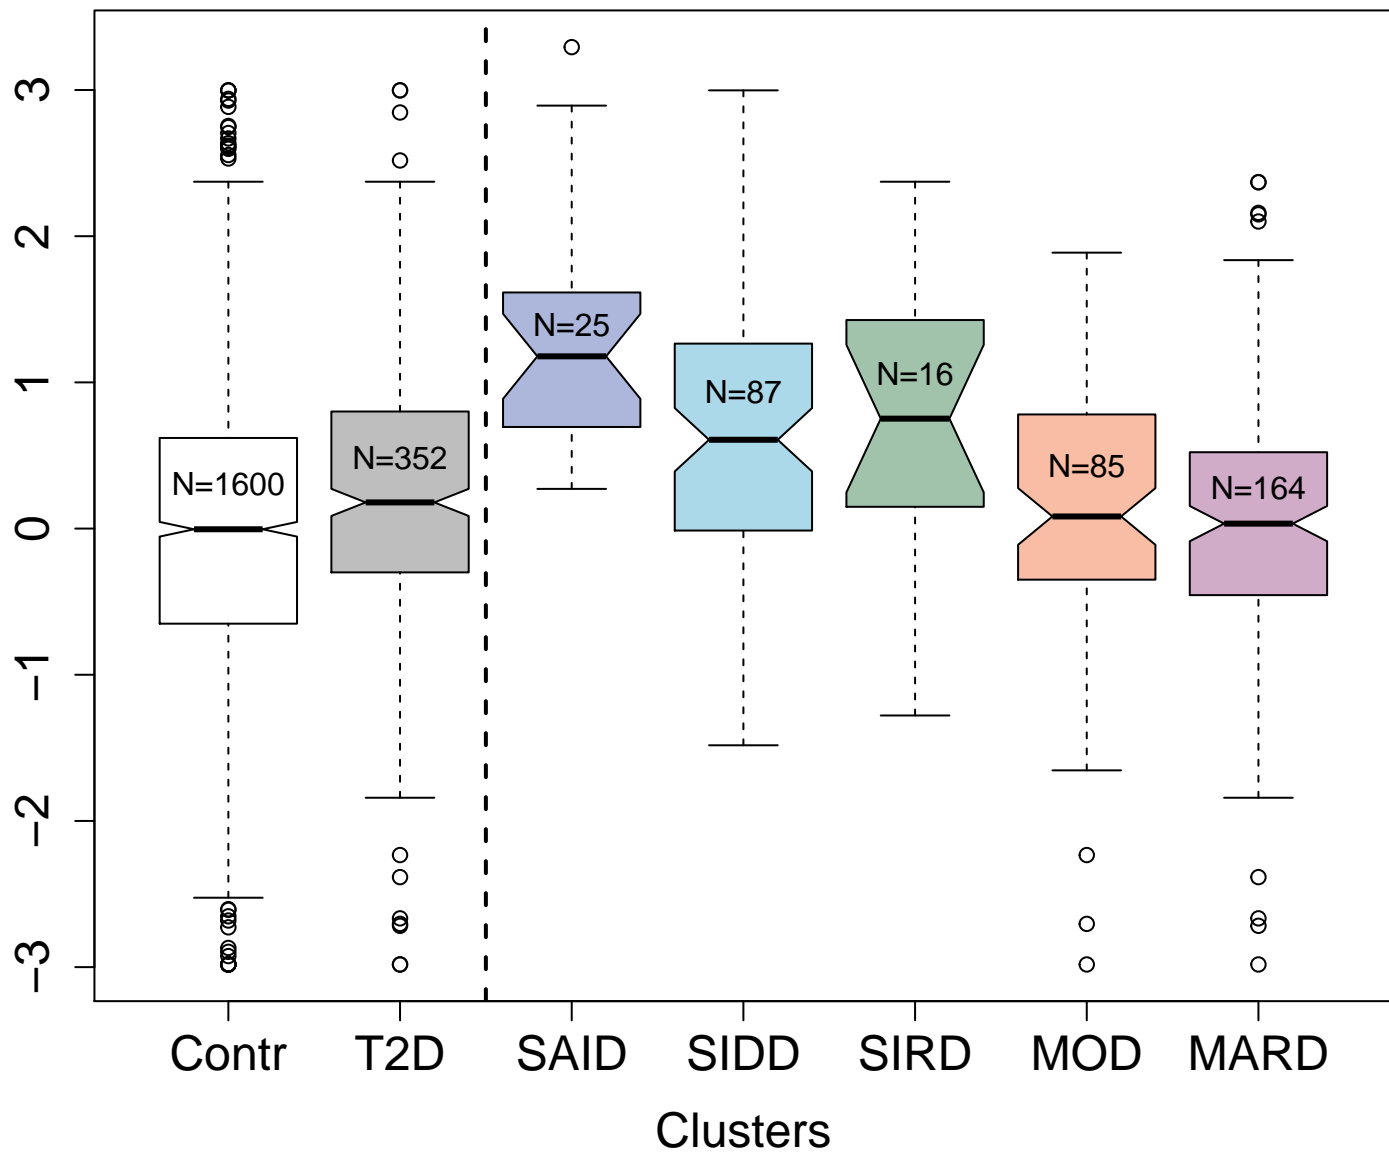



M1604 : urate

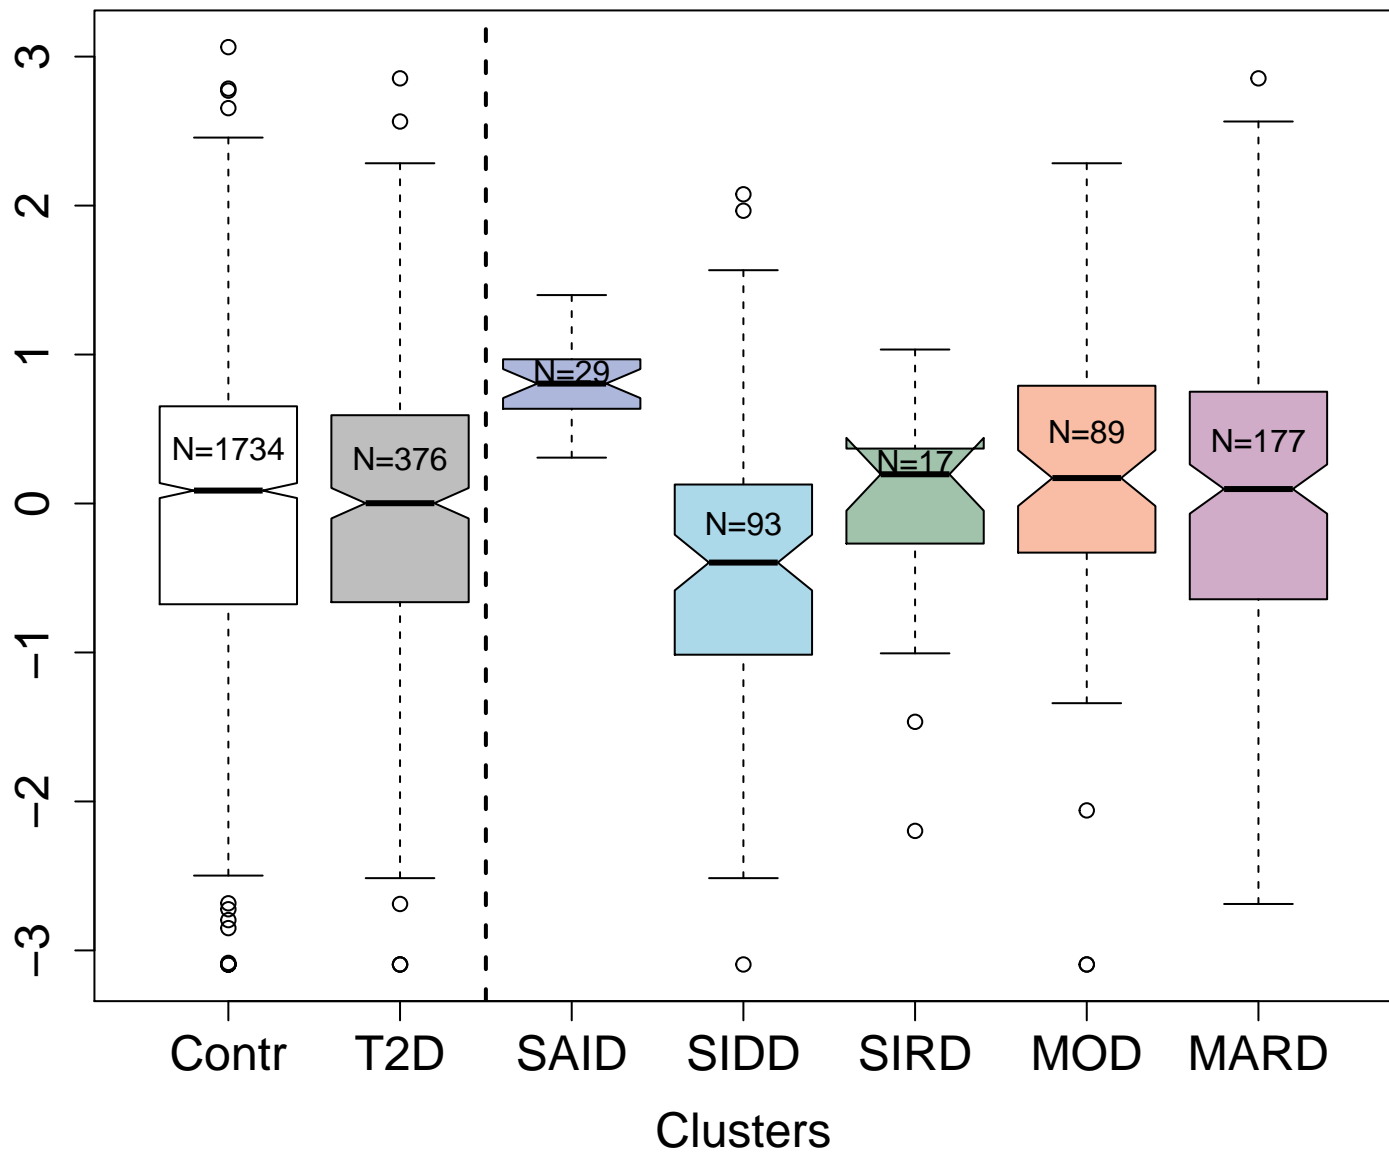

M62947 : N,N,N-trimethyl-L-alanylproline betaine (TMAP)

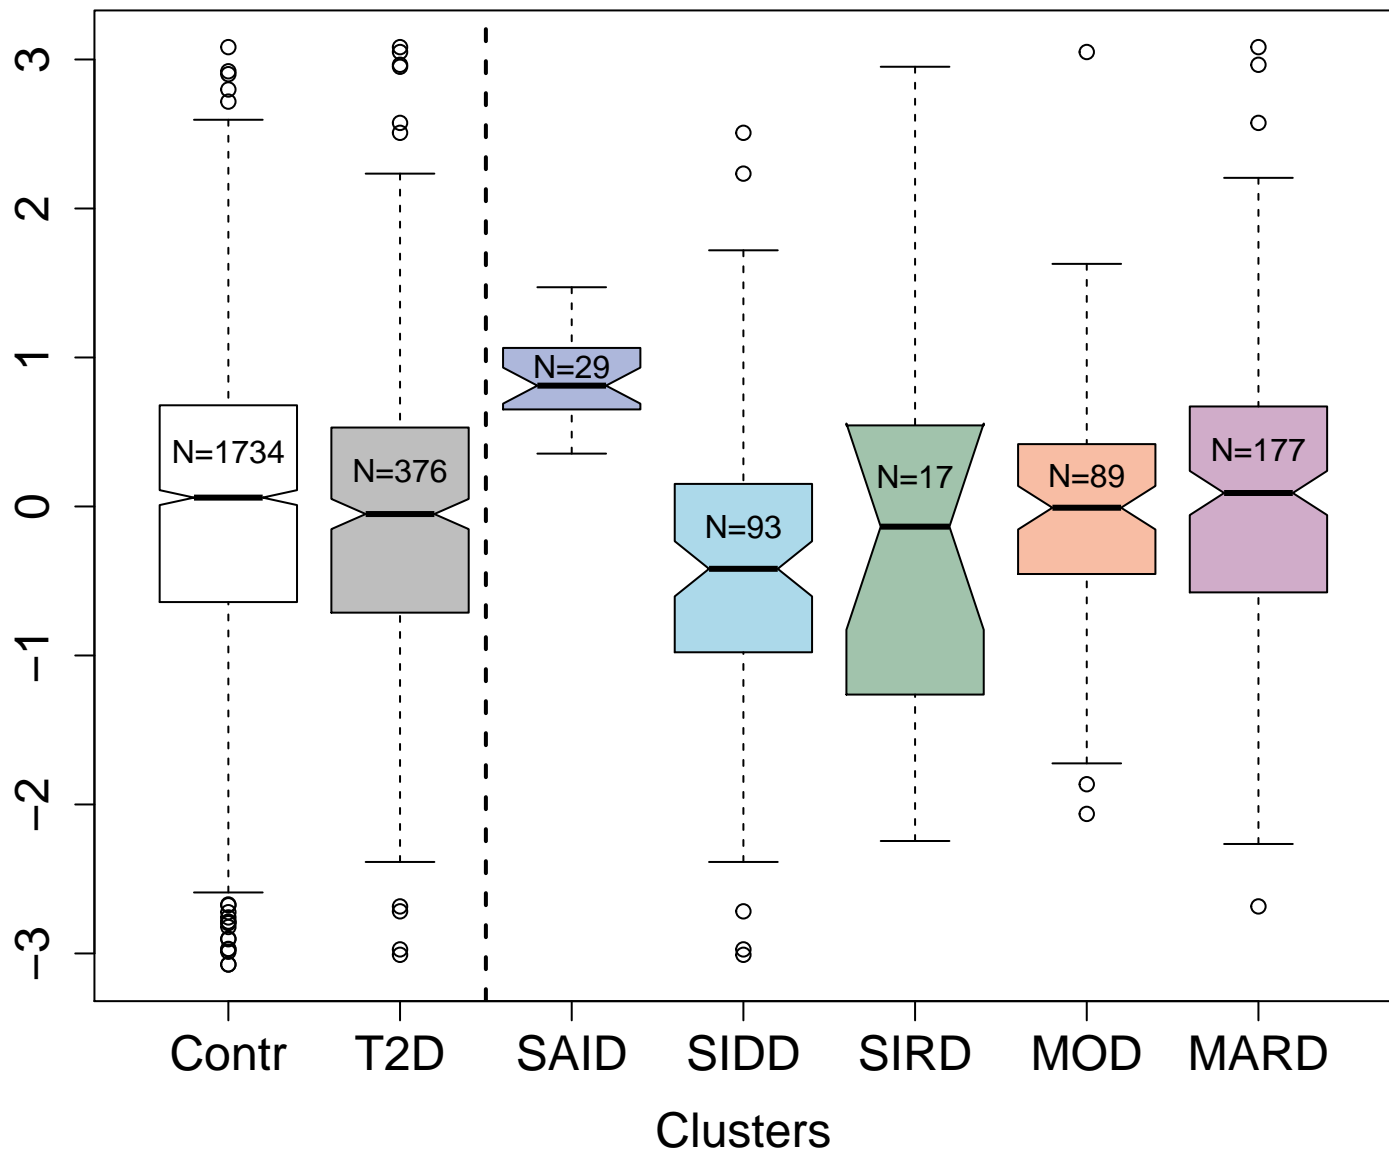

M62636 : X - 25343

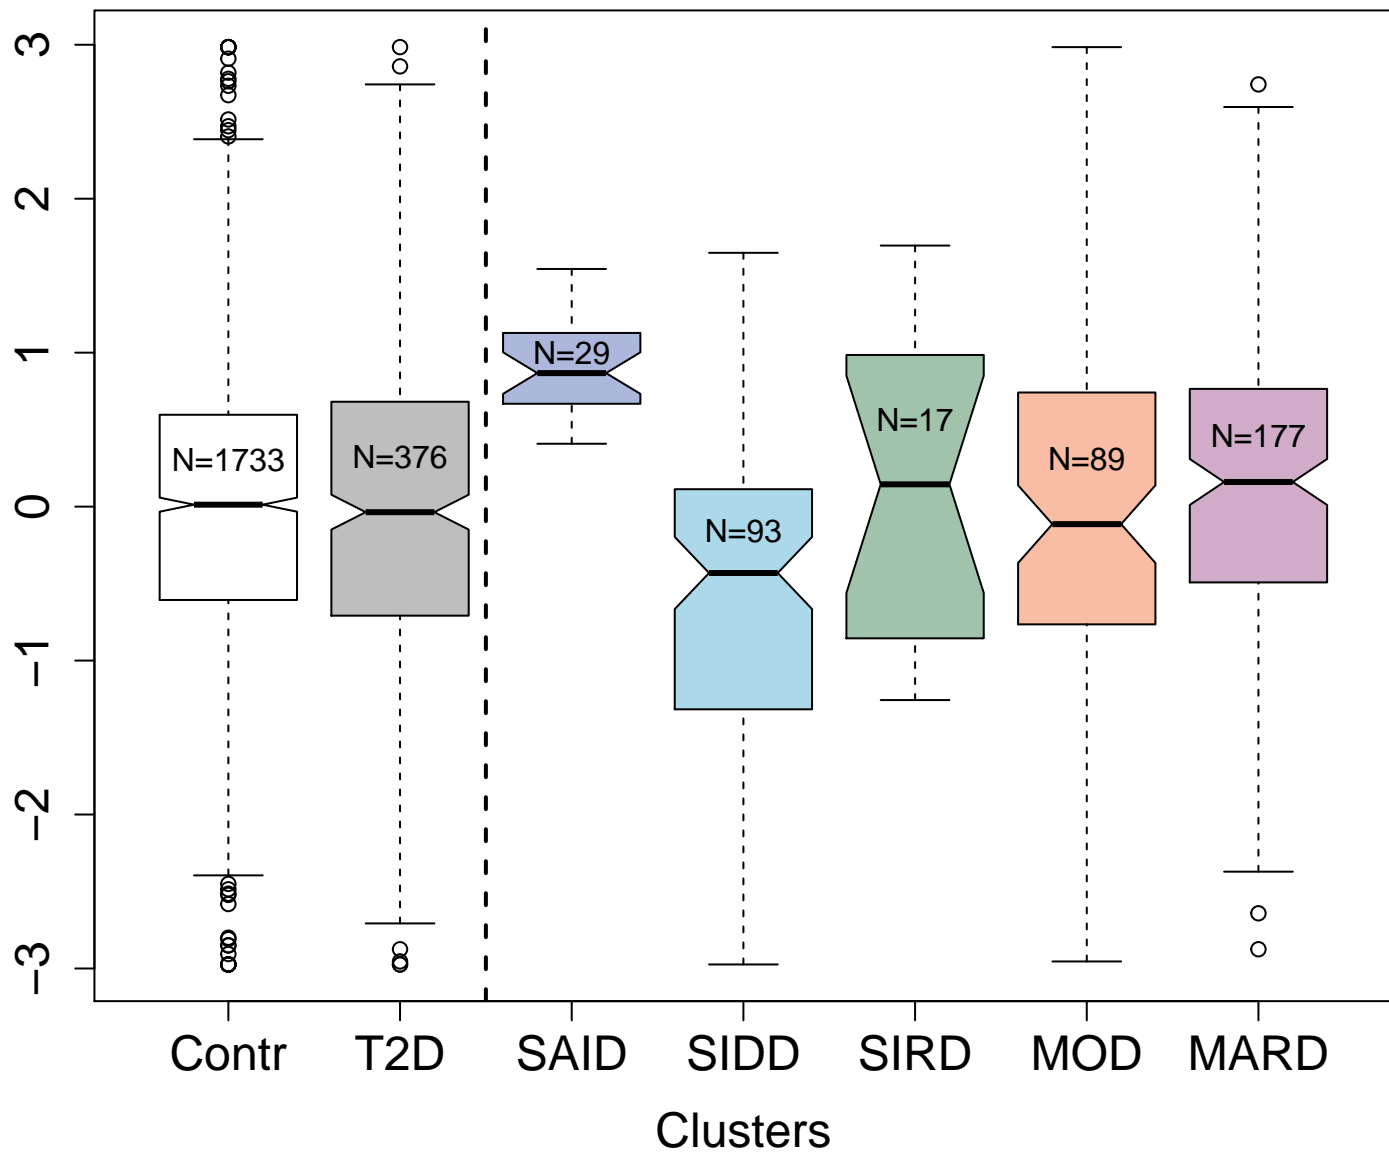

M35127 : pro-hydroxy-pro

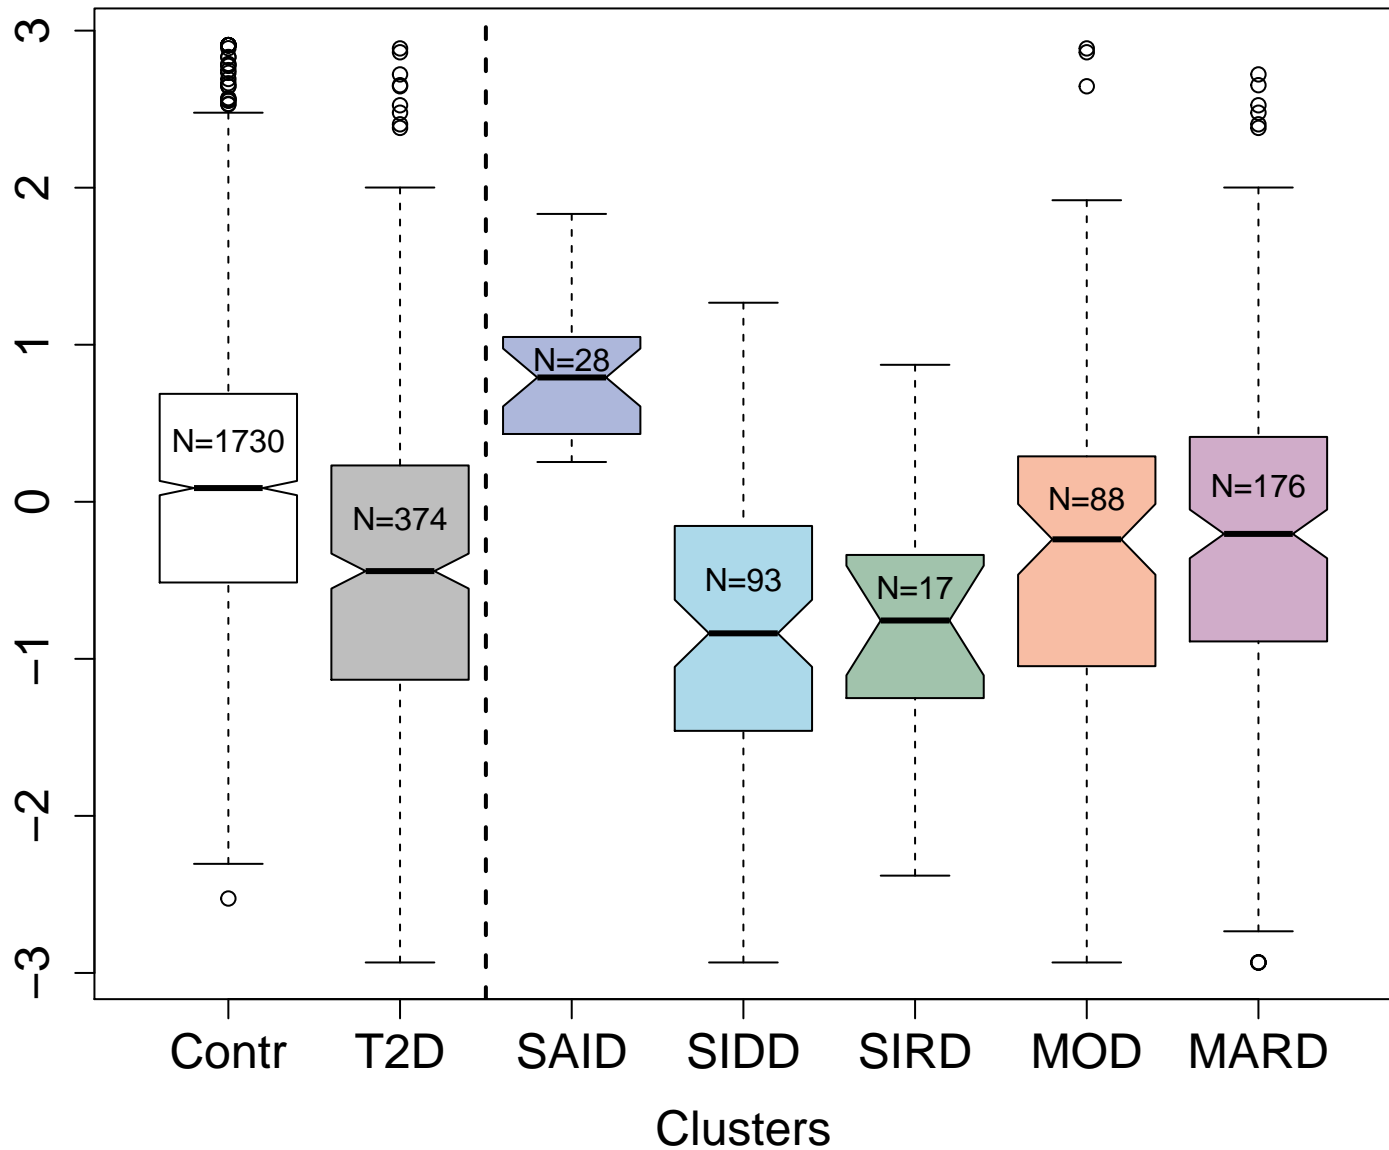

M52944 : palmitoylcholine

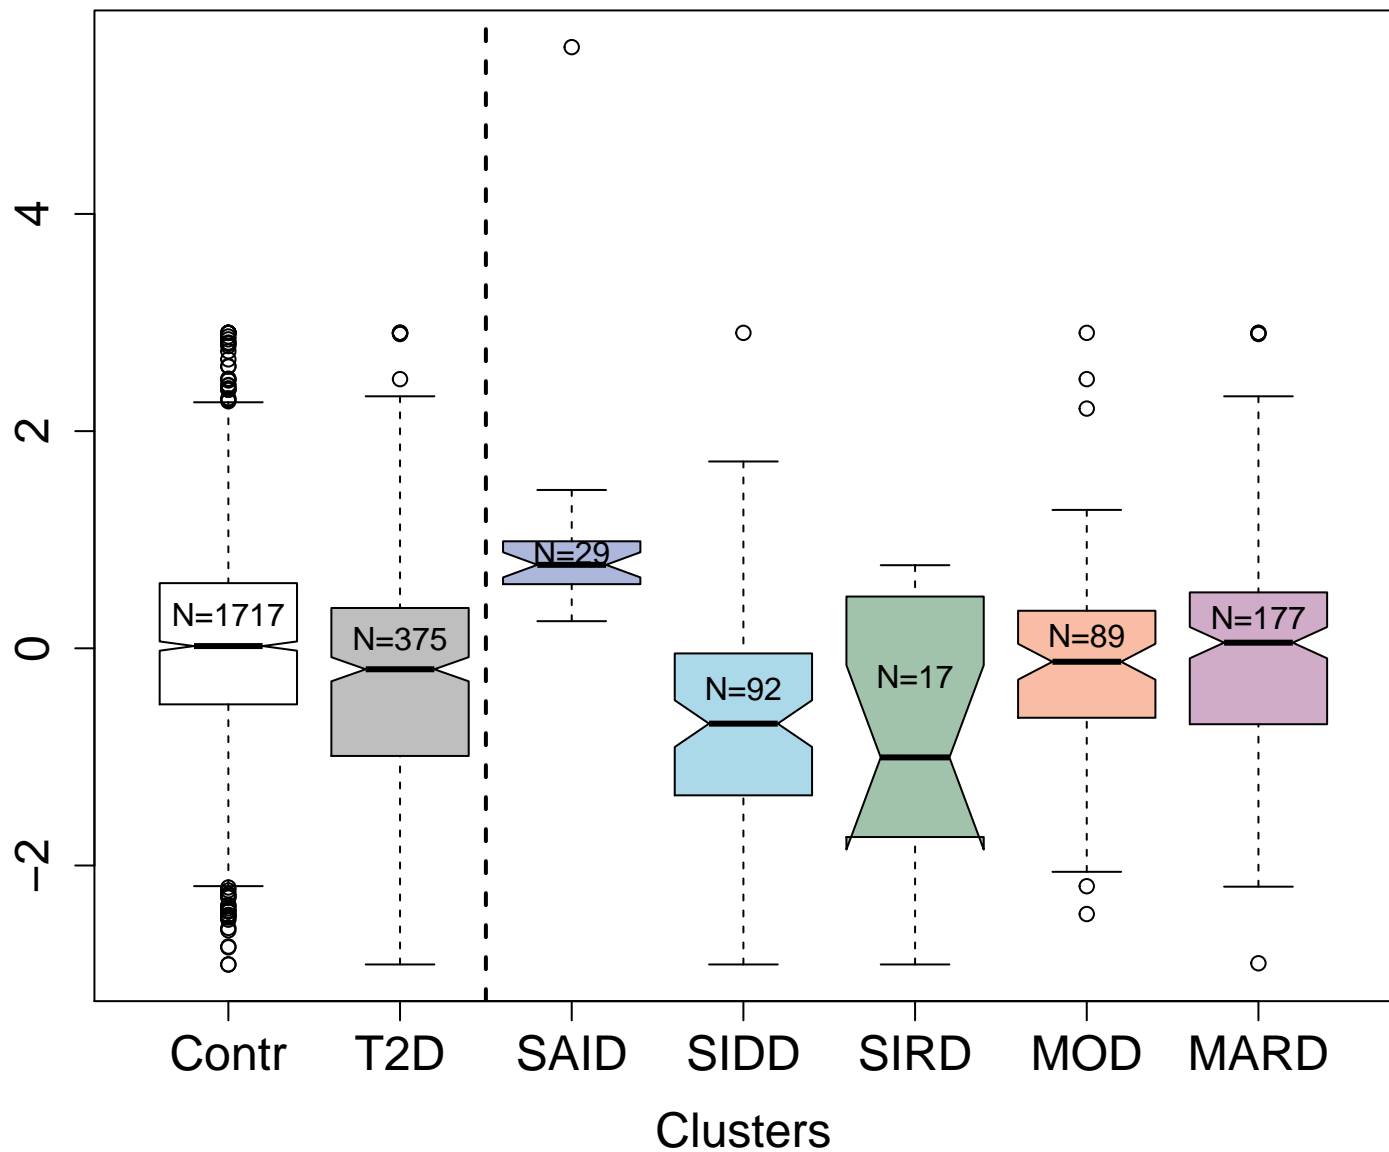

M42374 : 2-aminobutyrate

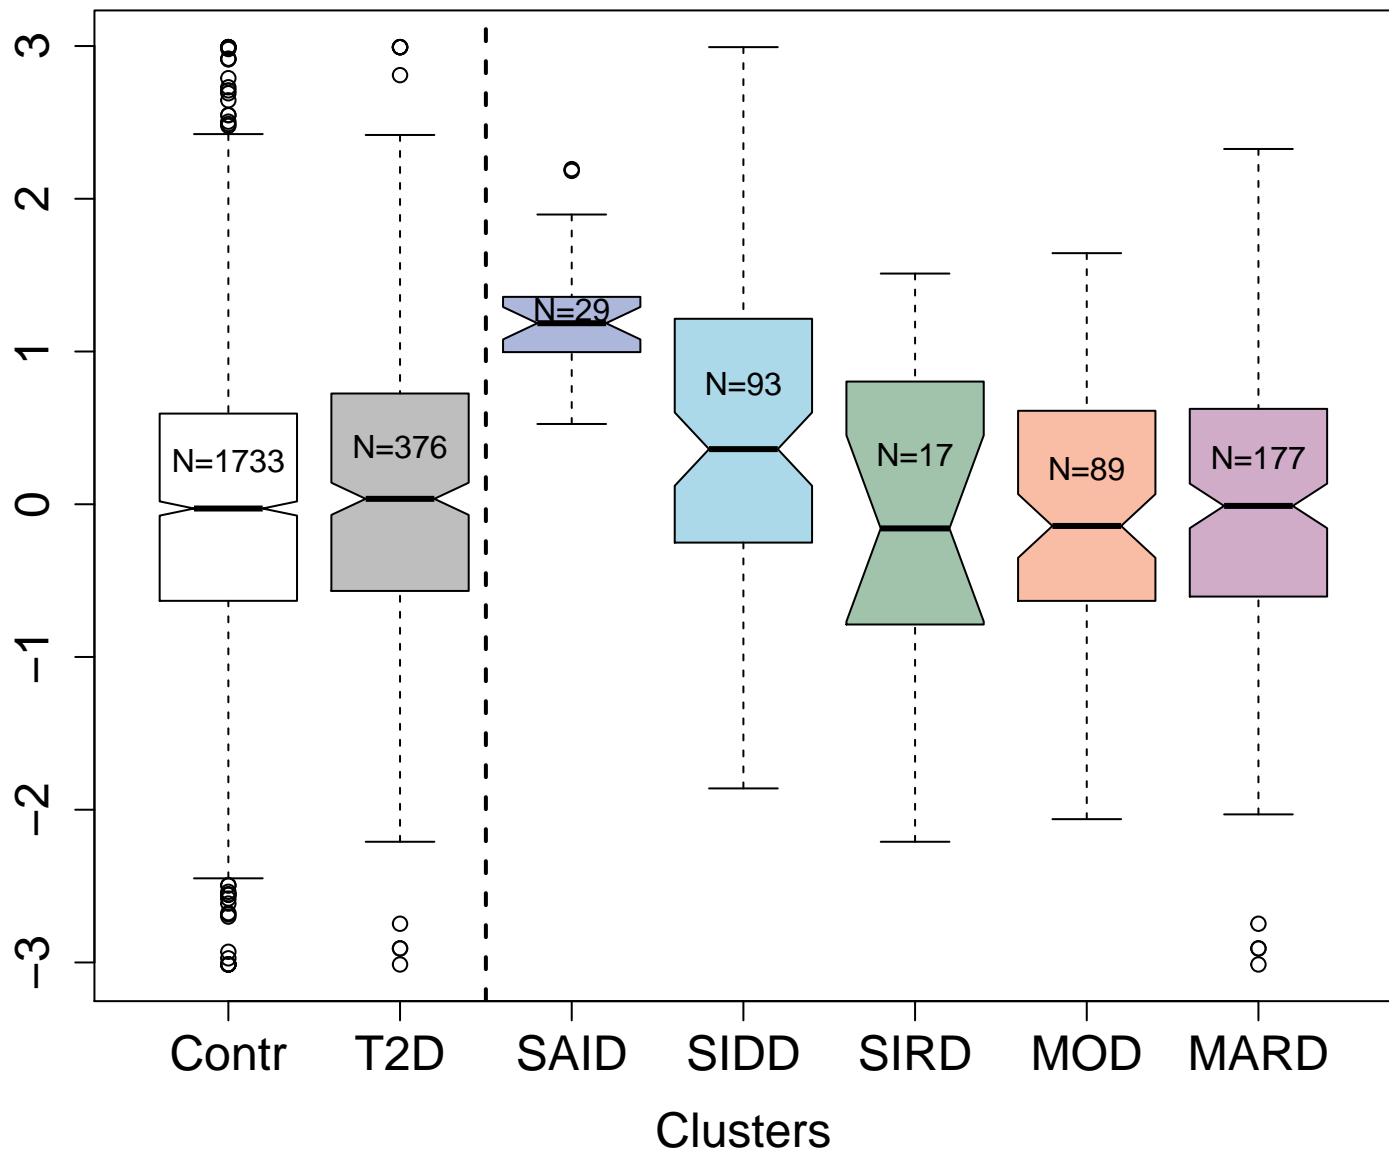

M15676 : 3-methyl-2-oxovalerate

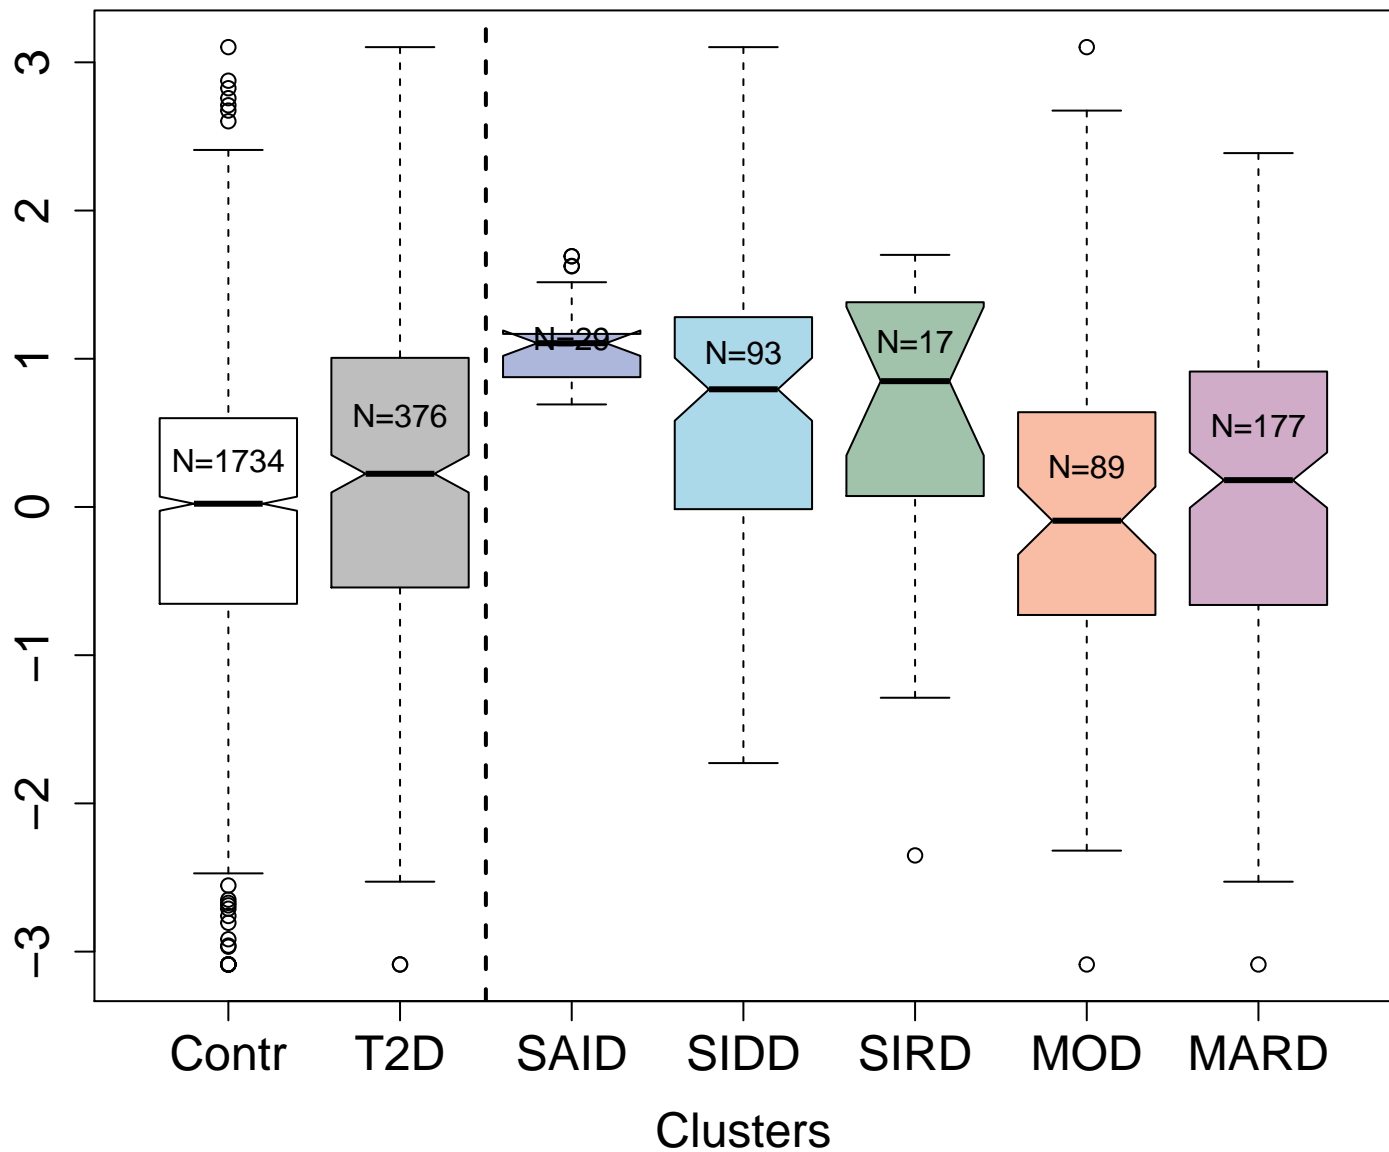

M33949 : gamma-glutamylglycine

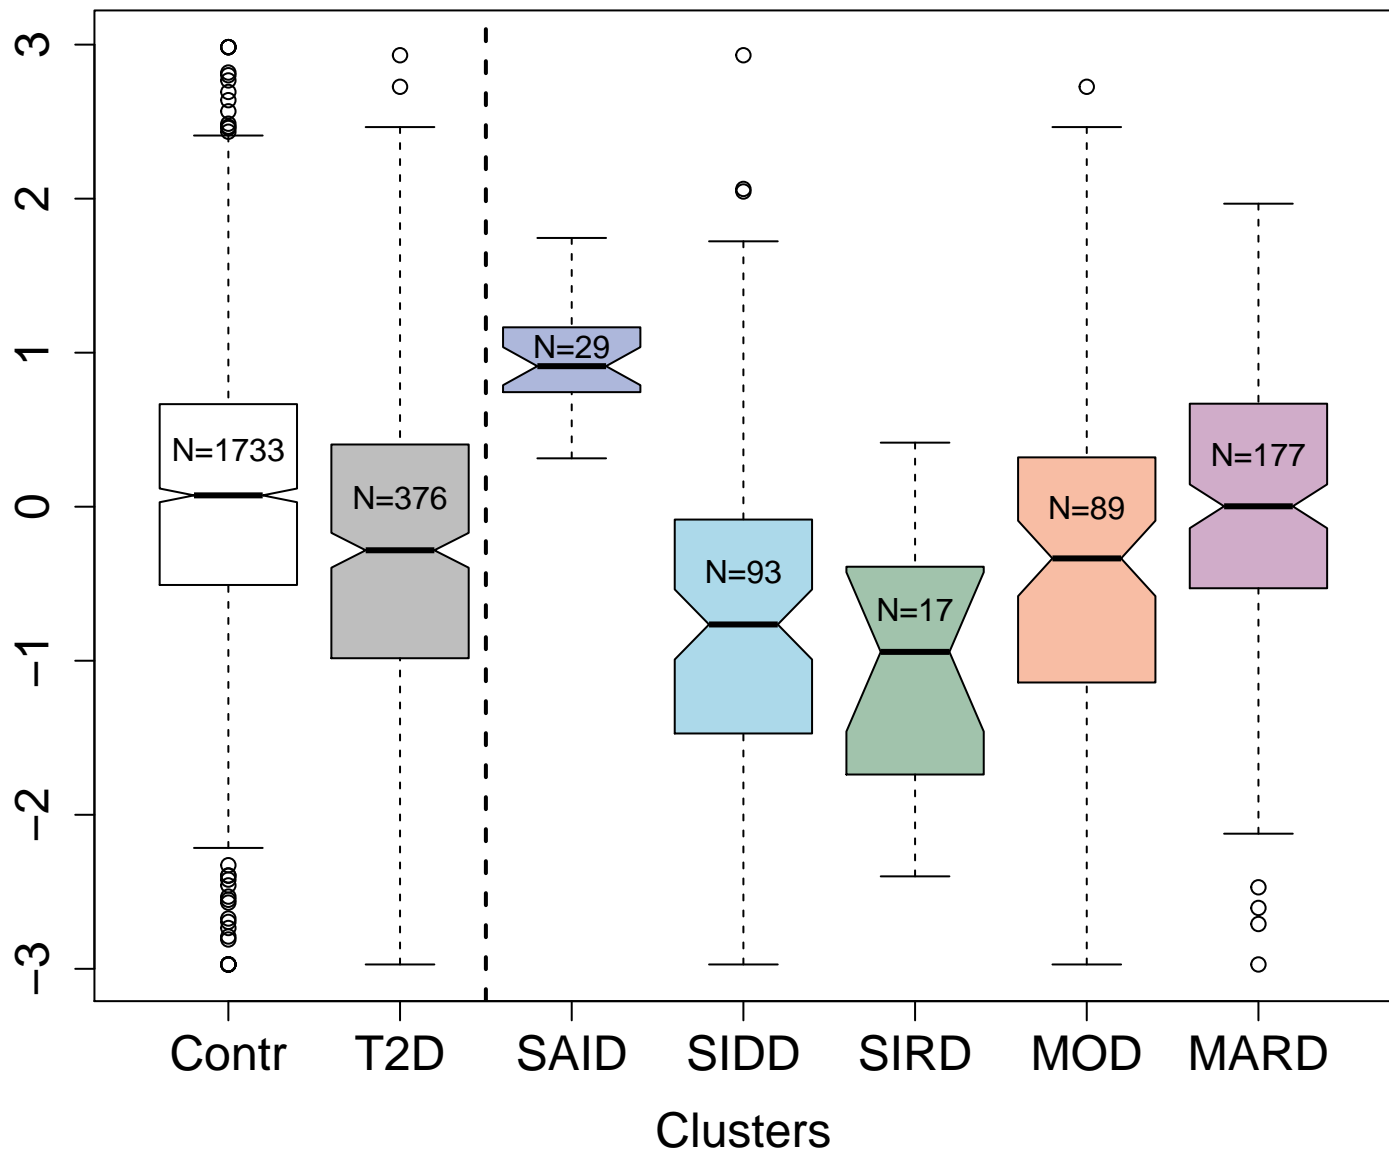



M542 : 3-hydroxybutyrate (BHBA)

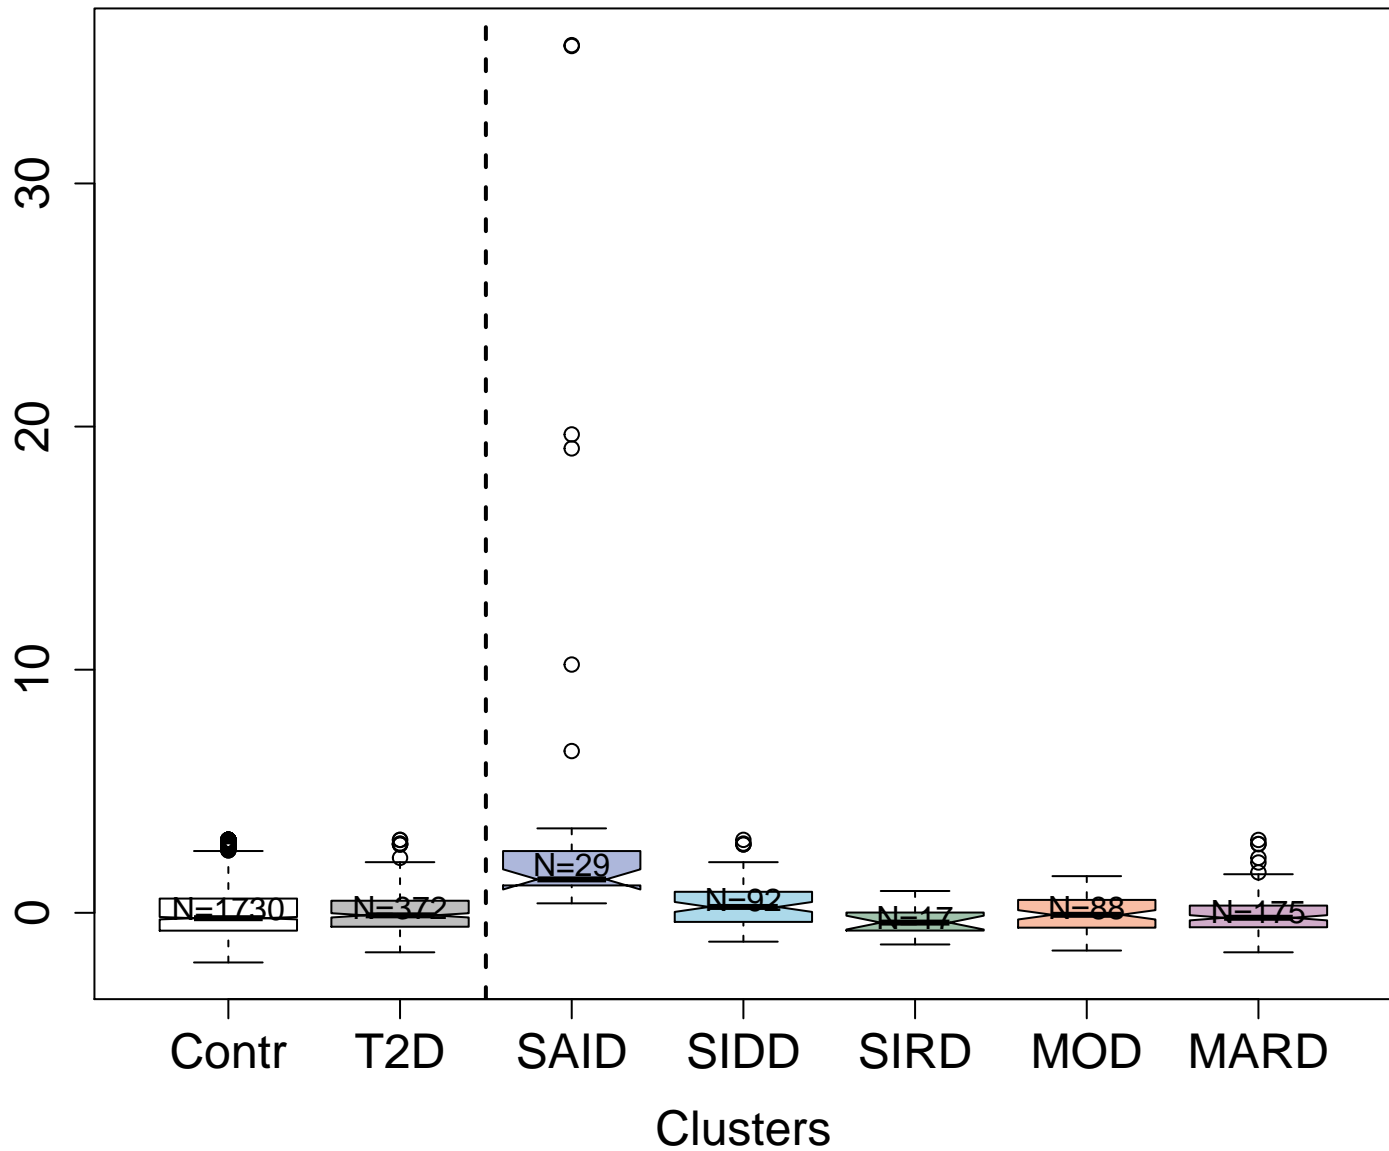

M57479 : sphingomyelin (d18:2/24:2)\*

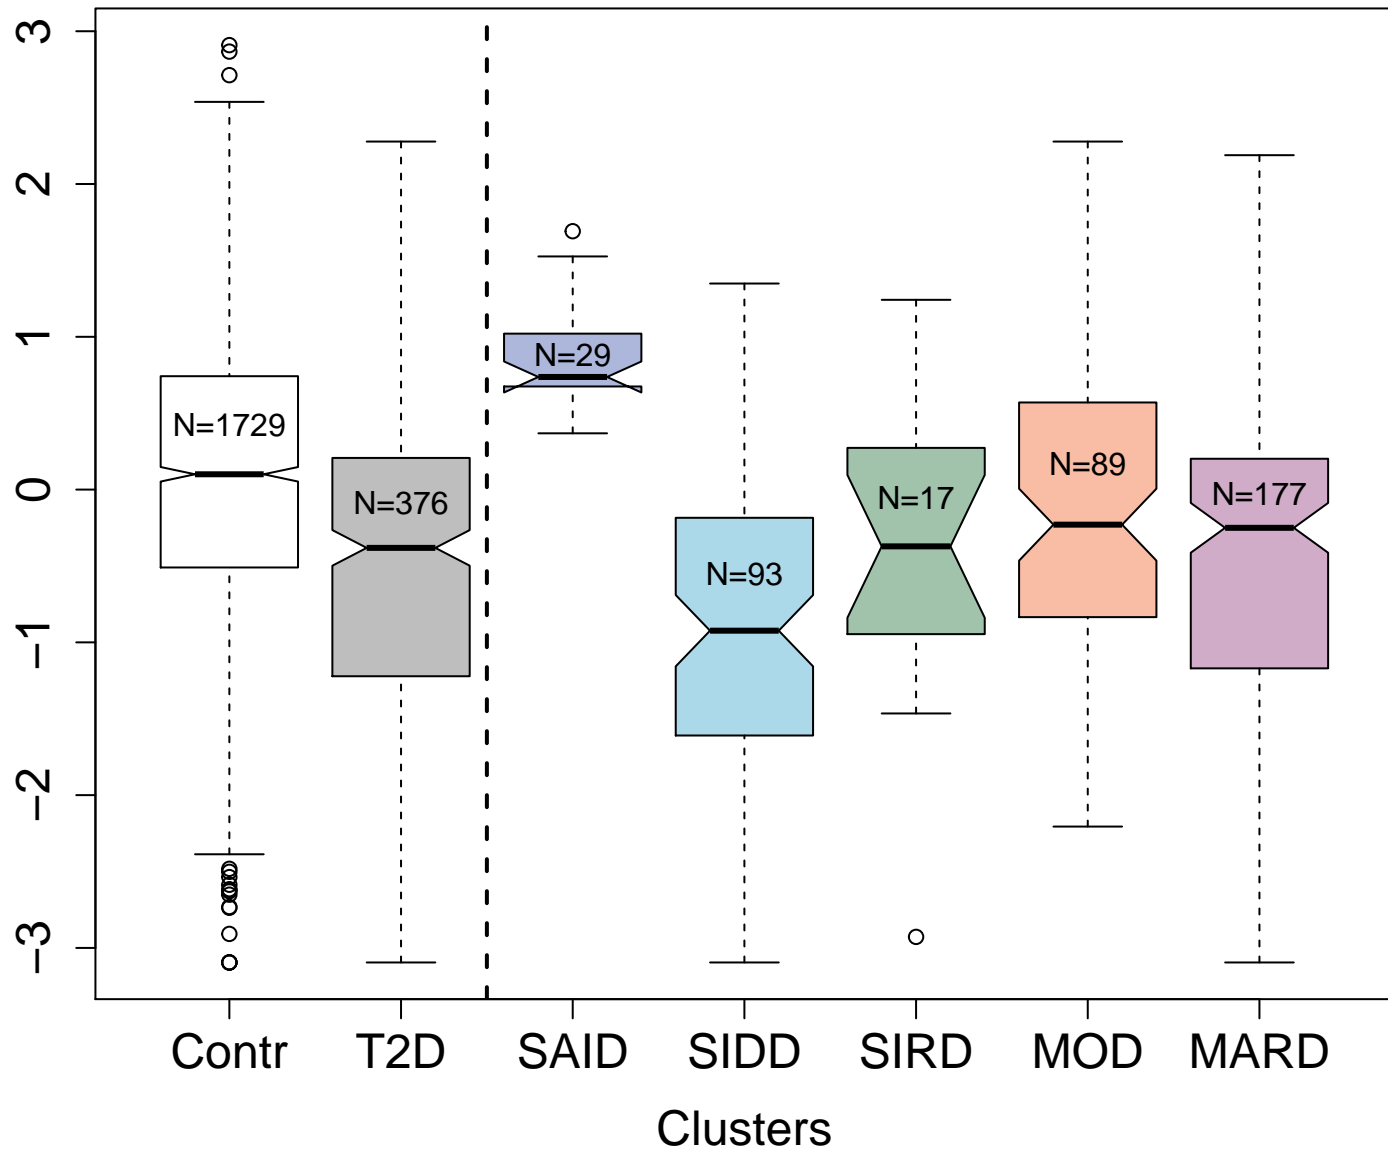

M52483 : X - 24295

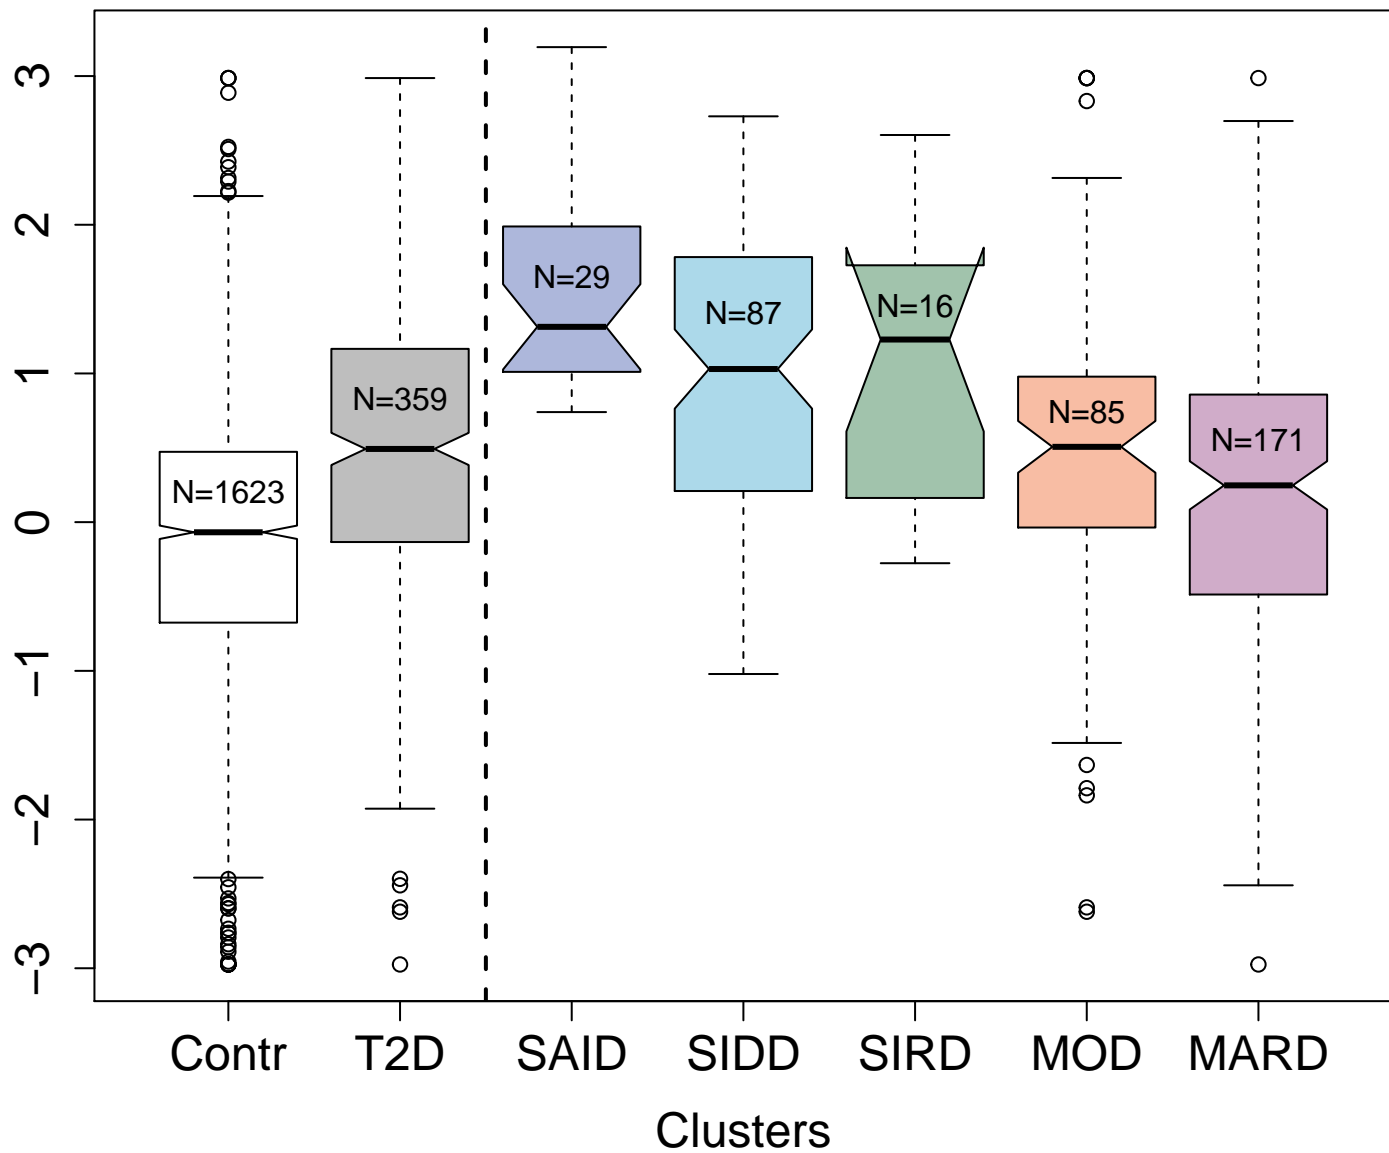

M53261 : arachidonoylcholine

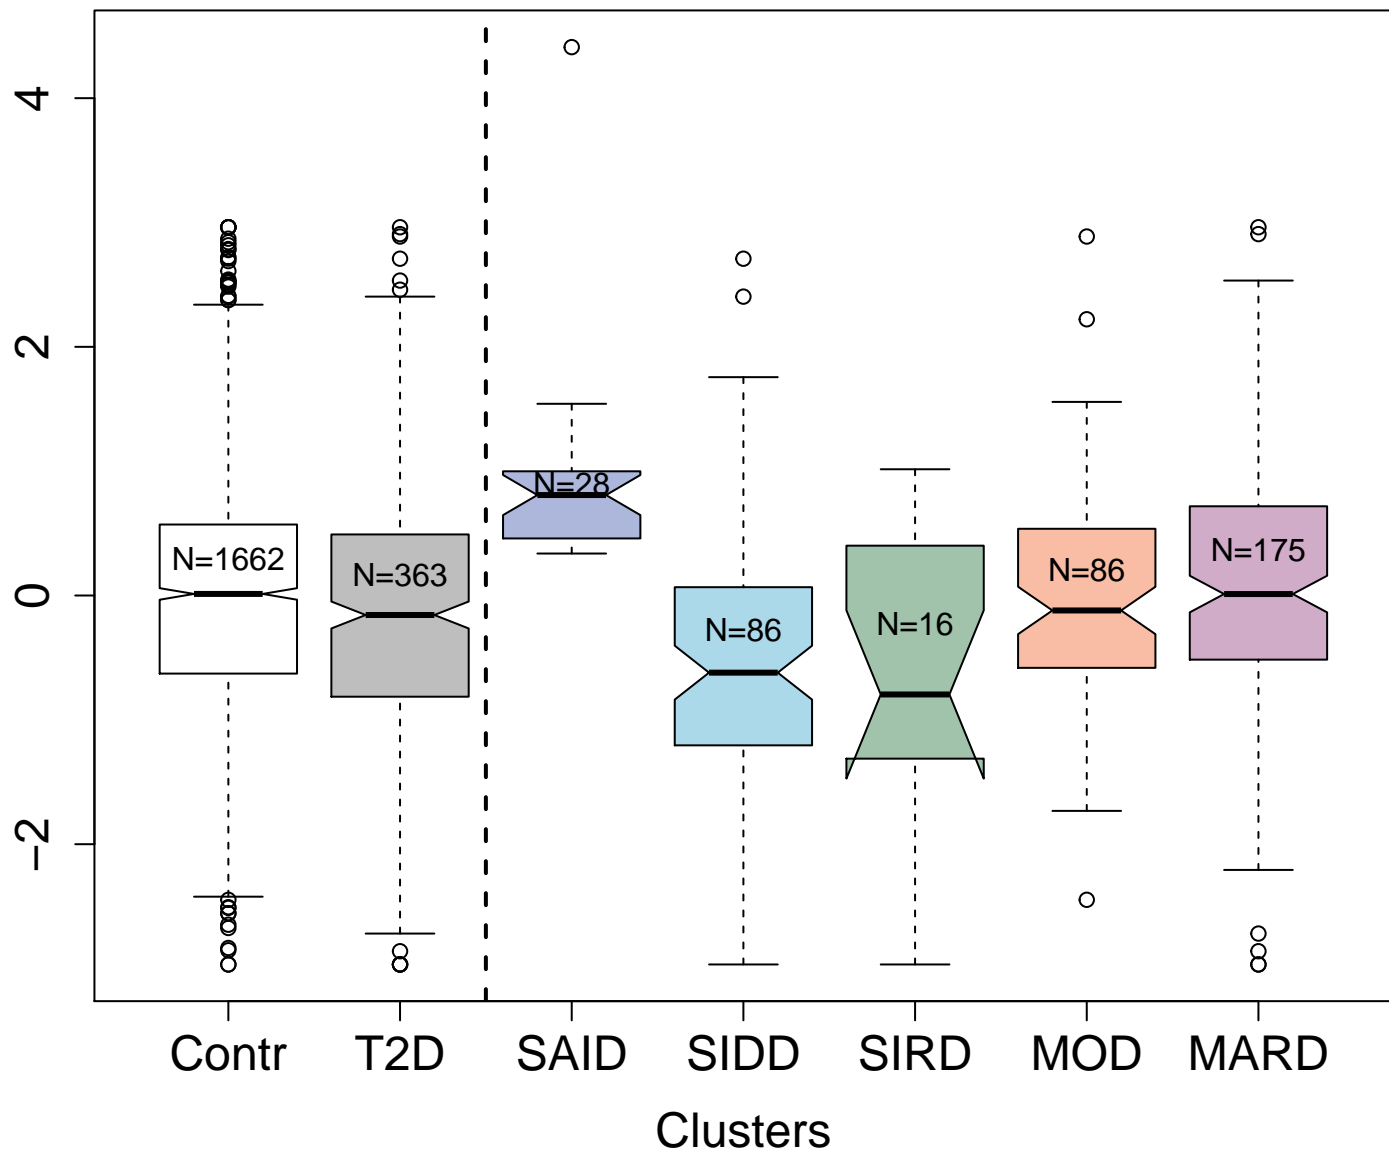

M48491 : sphingomyelin (d18:1/20:1, d18:2/20:0)\*

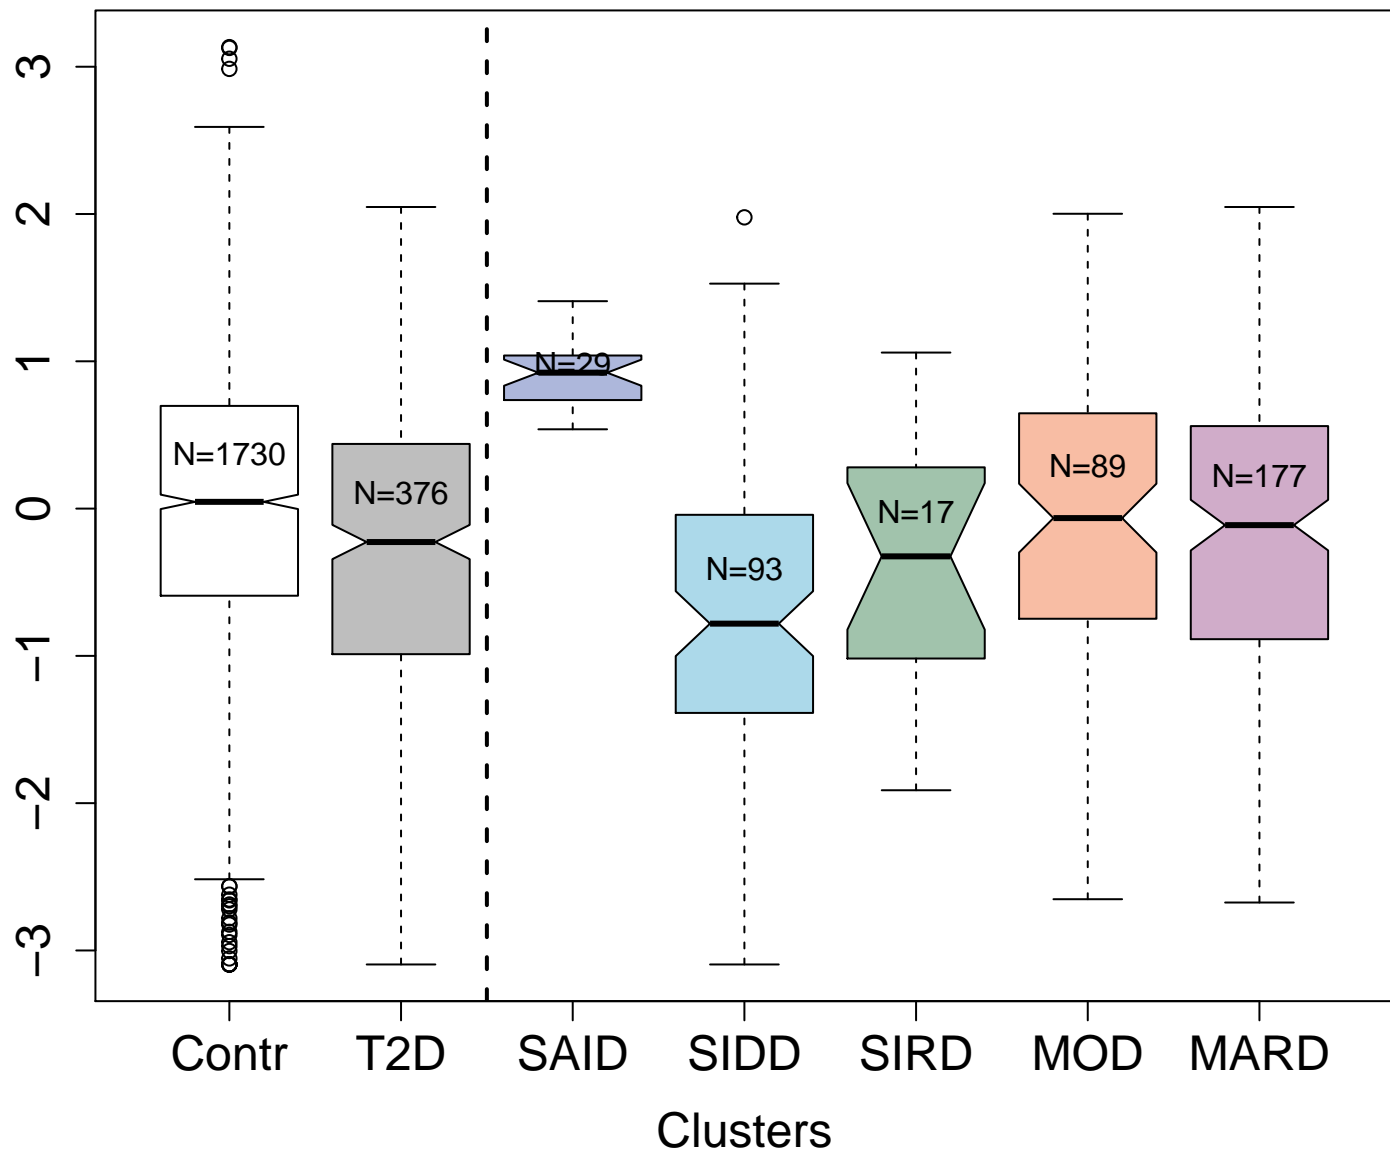

M5086 : dimethylglycine

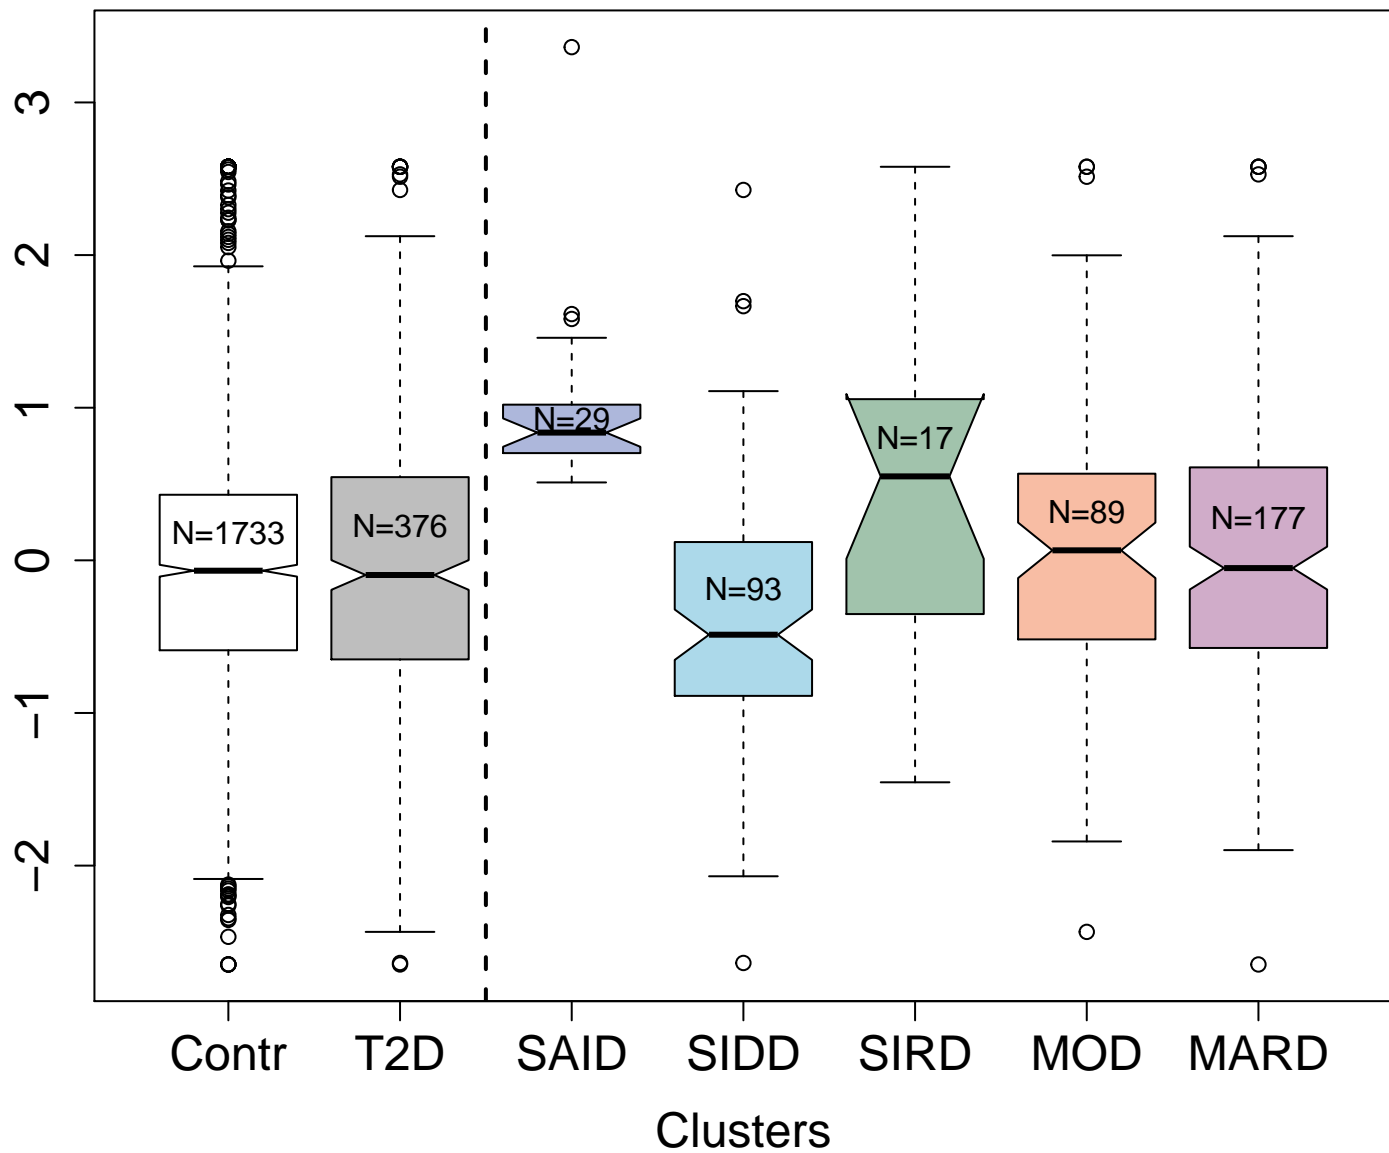

M1769 : cortisone

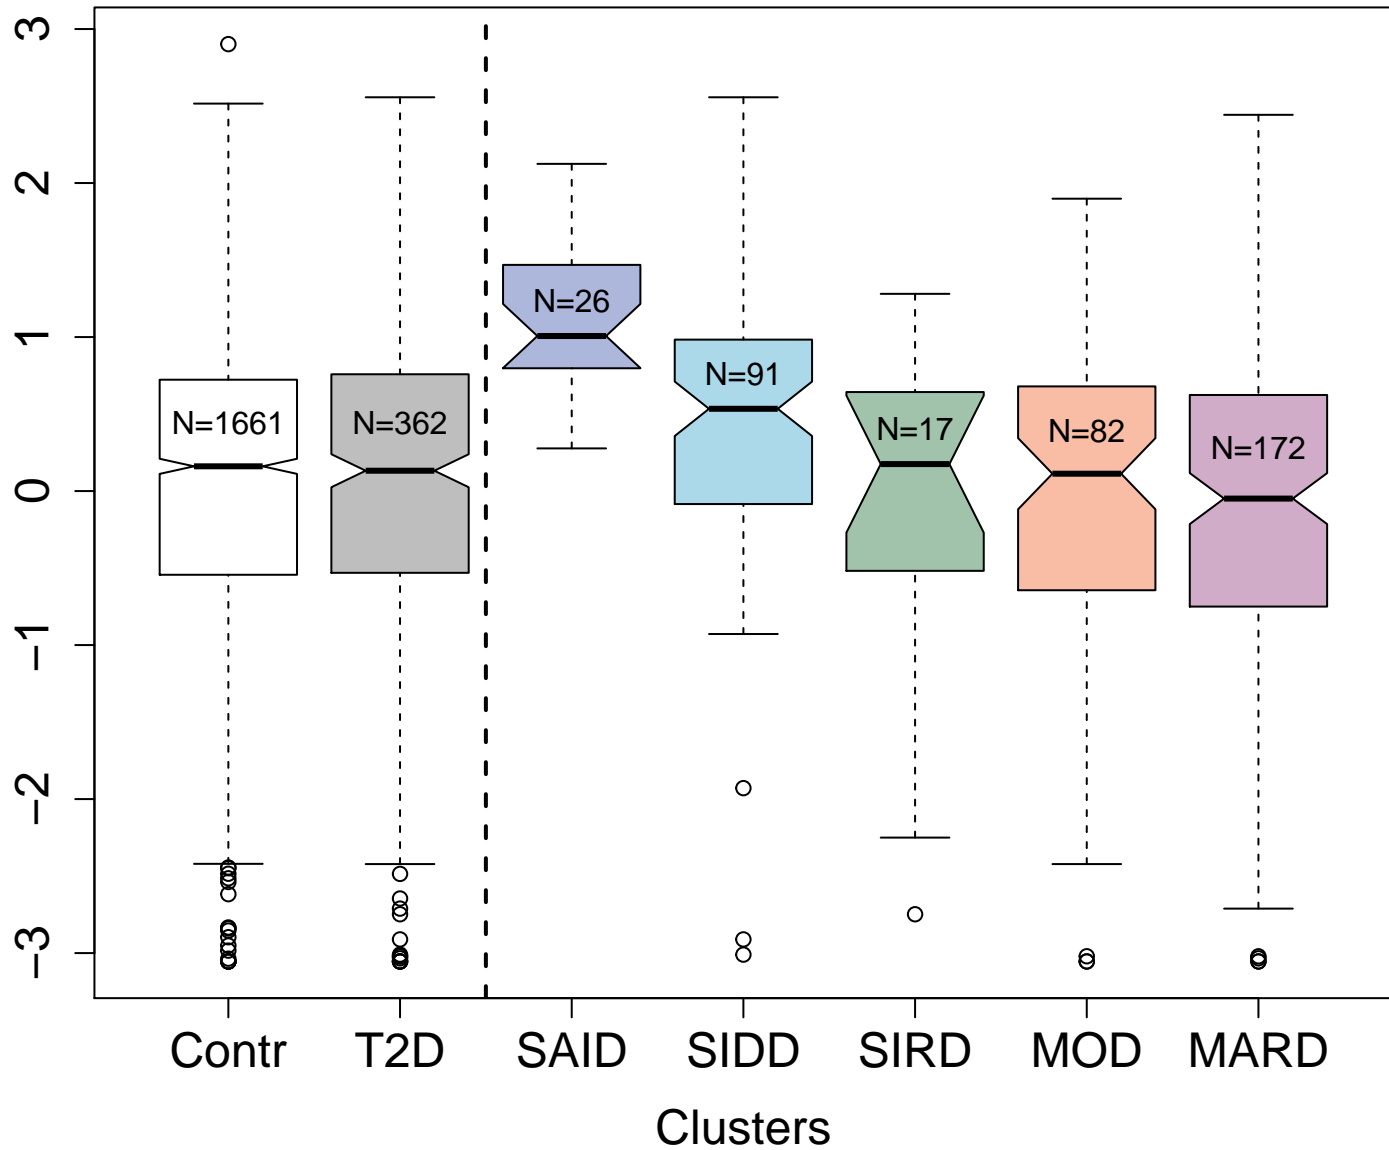

M1712 : cortisol

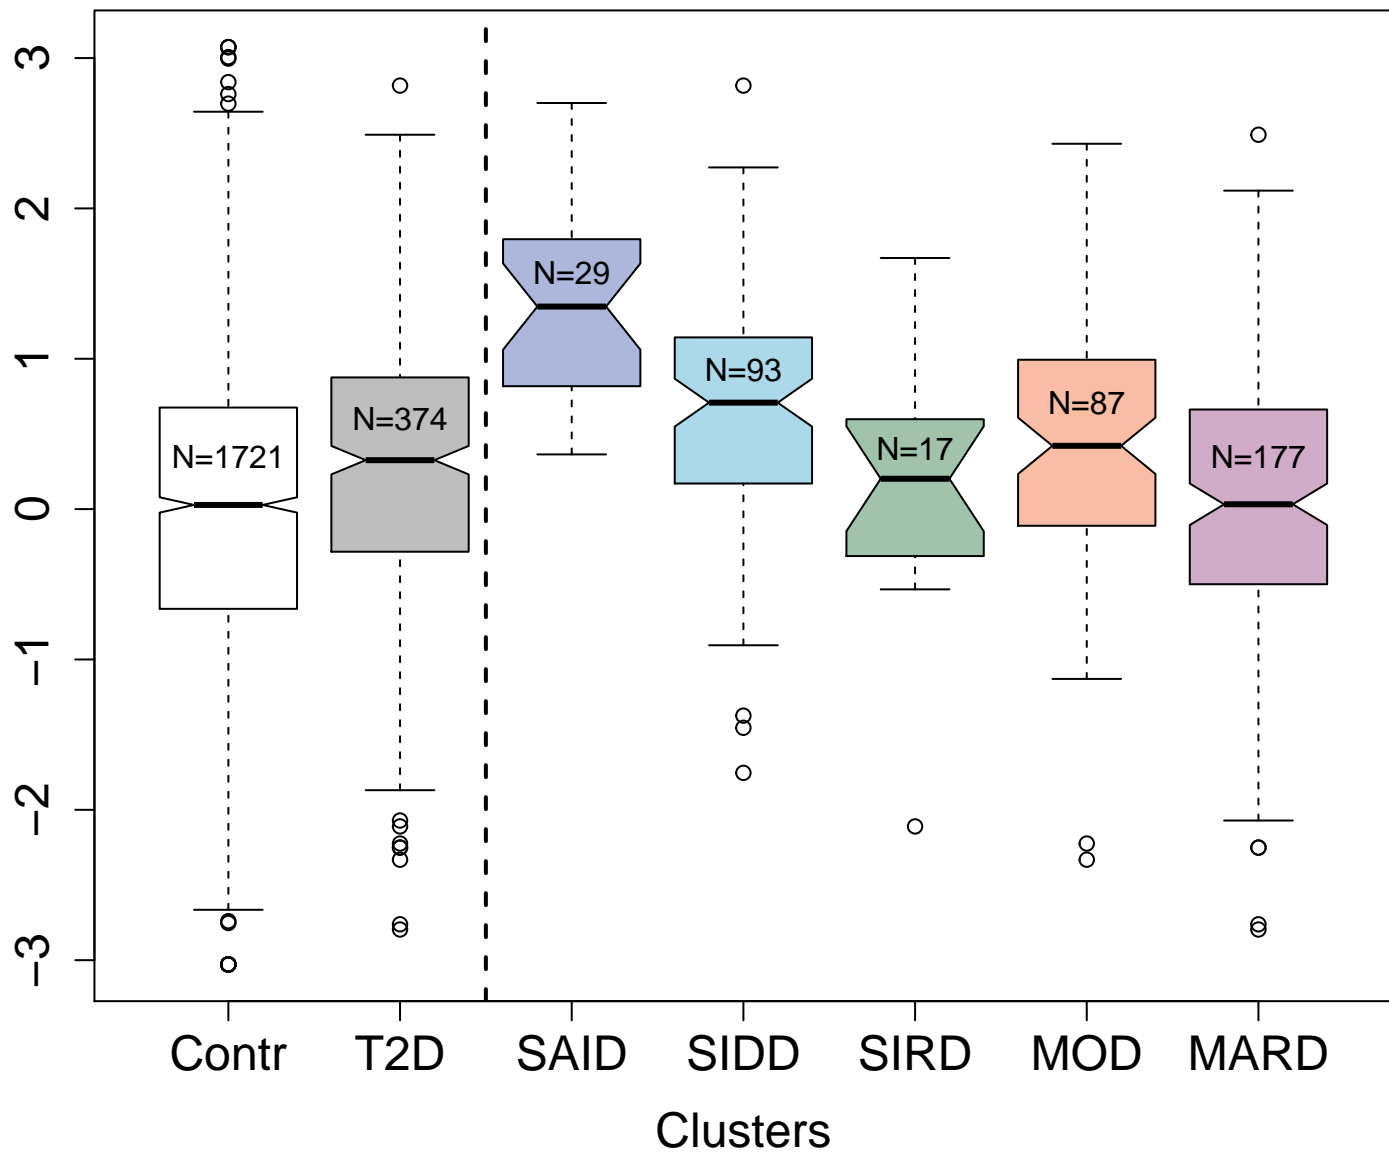



M15990 : glycerophosphorylcholine (GPC)

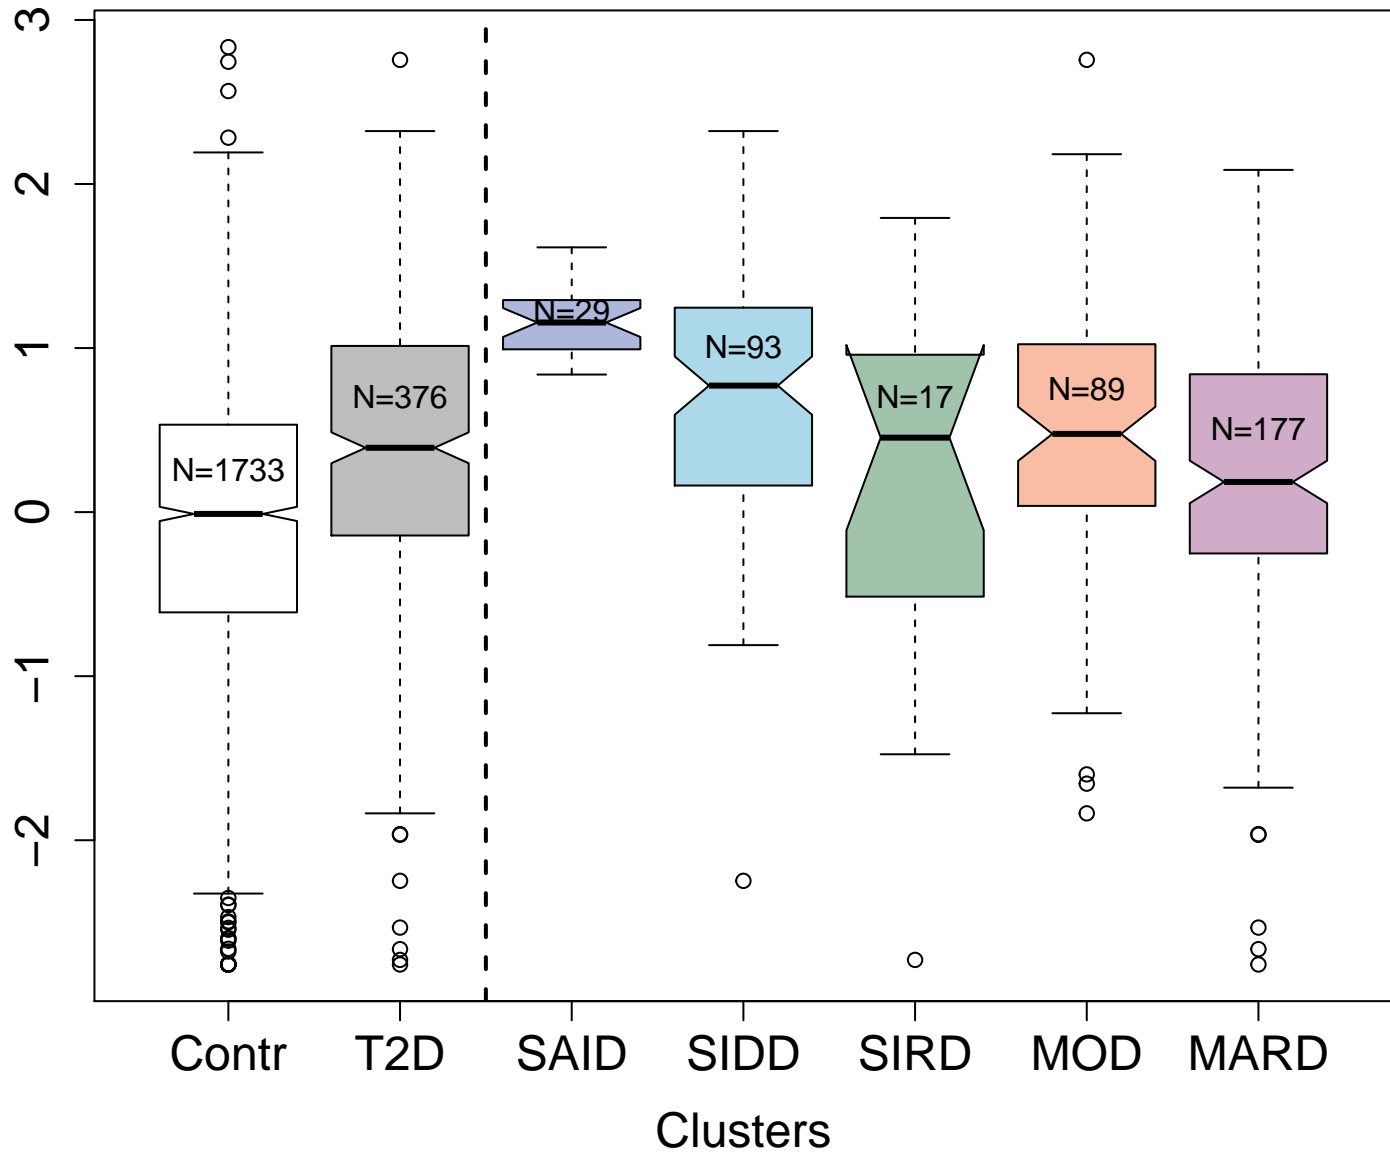

M62963 : X - 25519

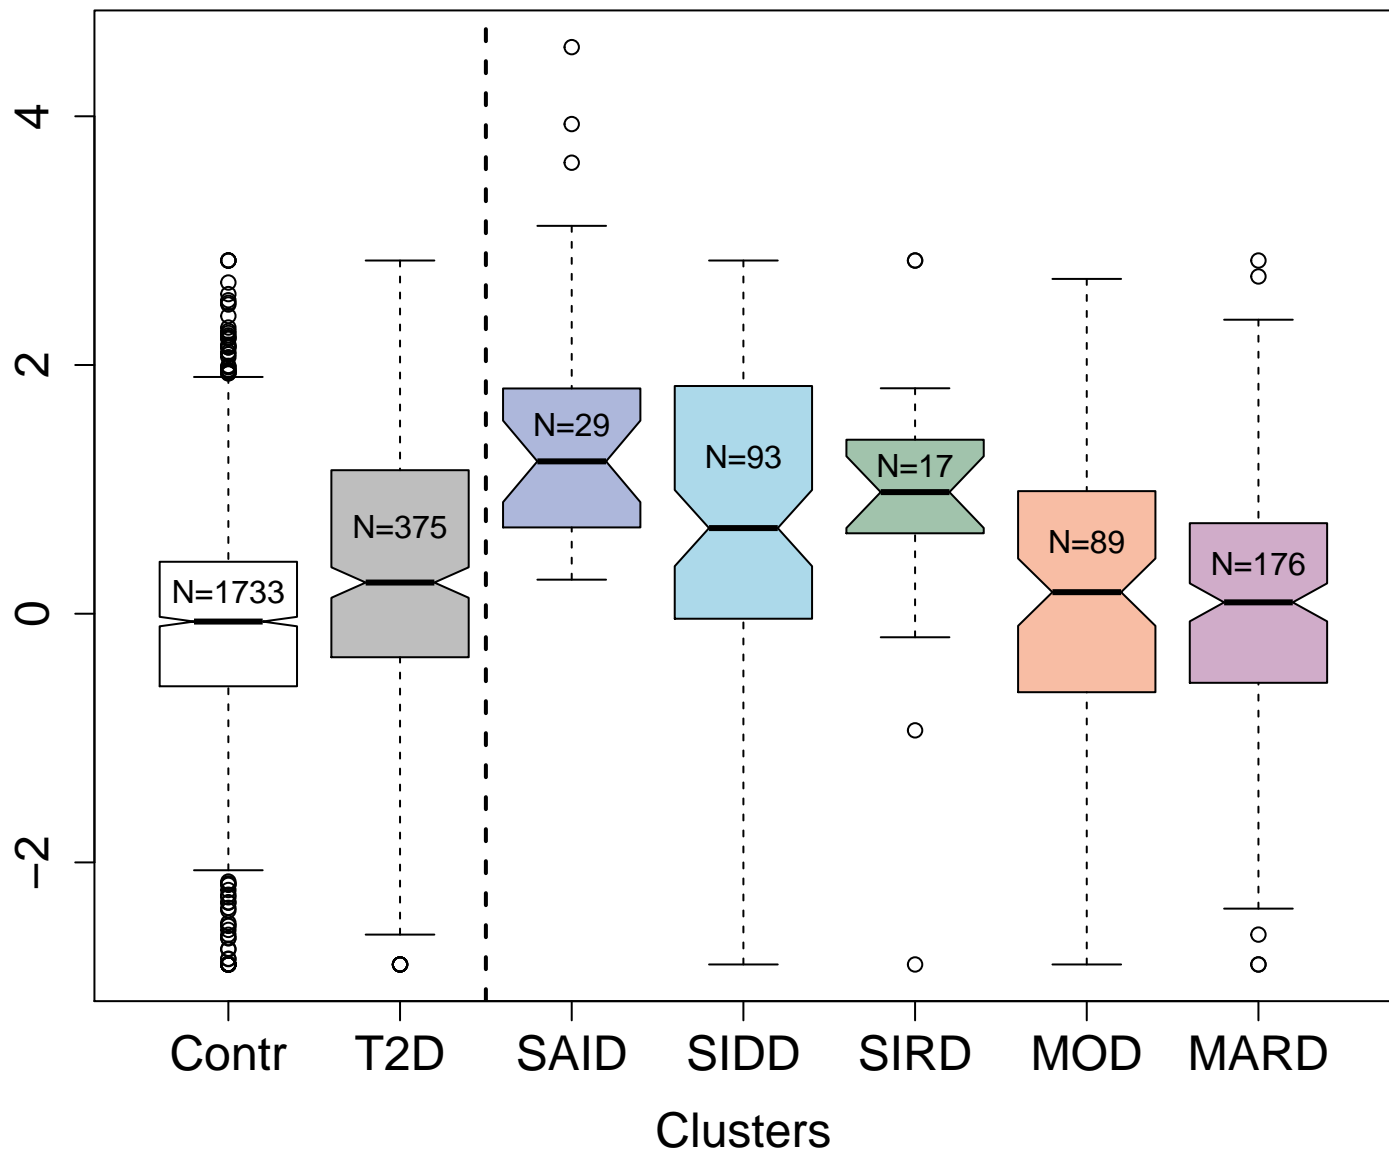

M35678 : hexadecanedioate (C16-DC)

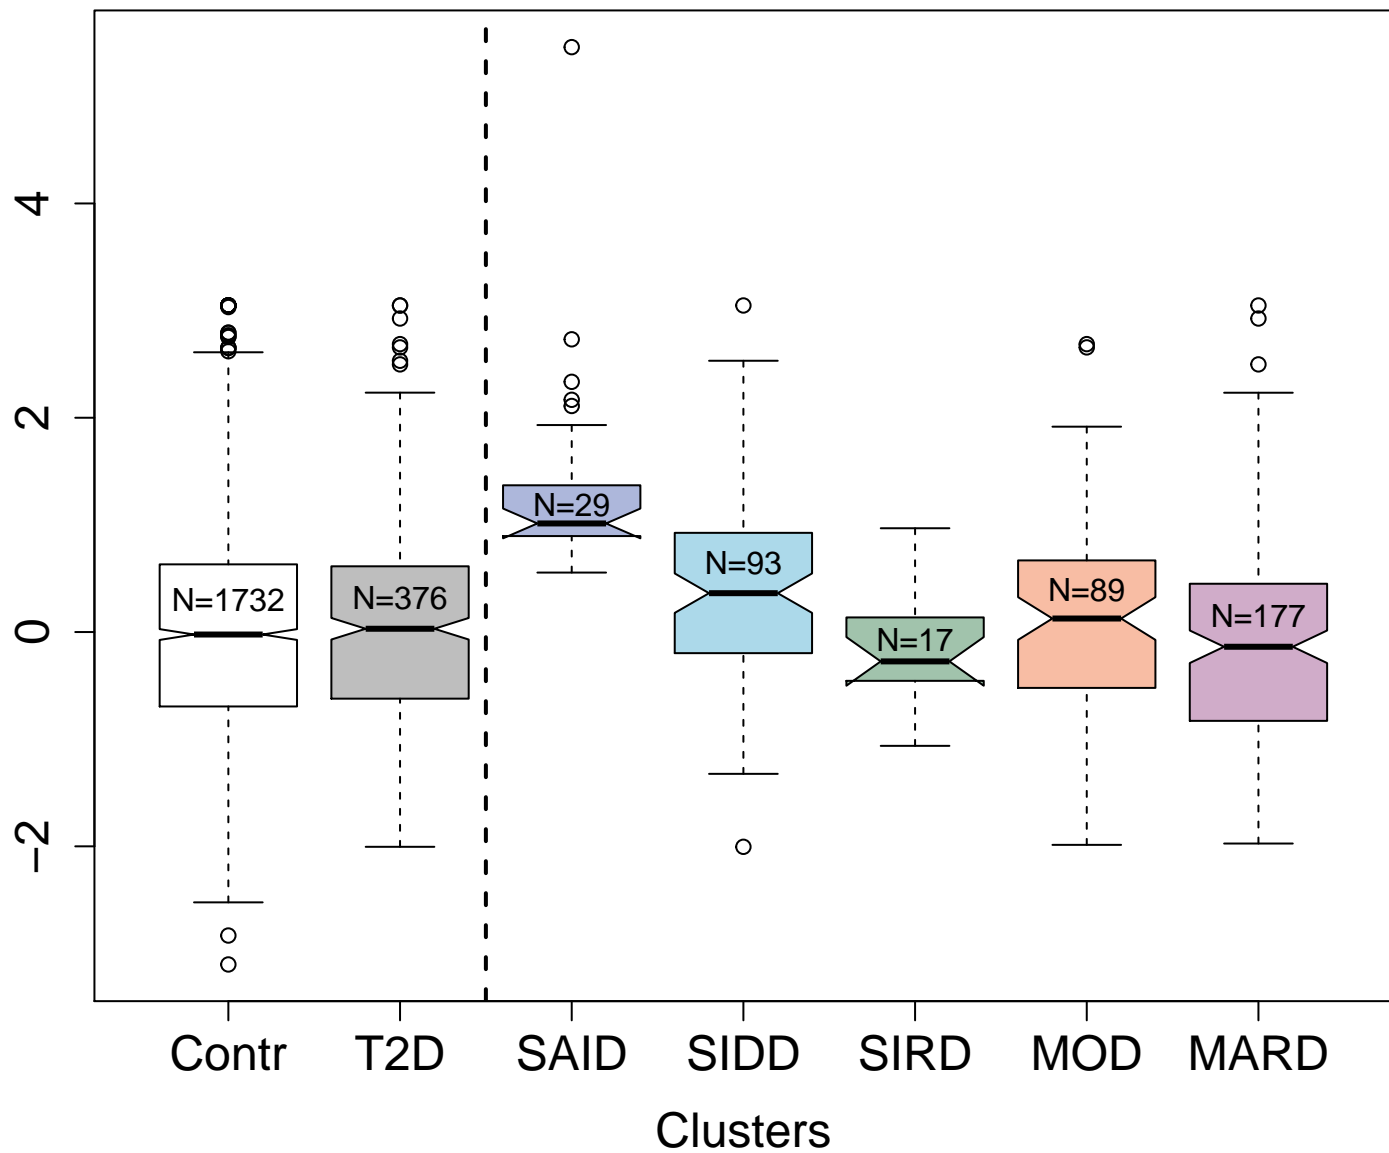

M63688 : deoxychoic acid 12-sulfate\*

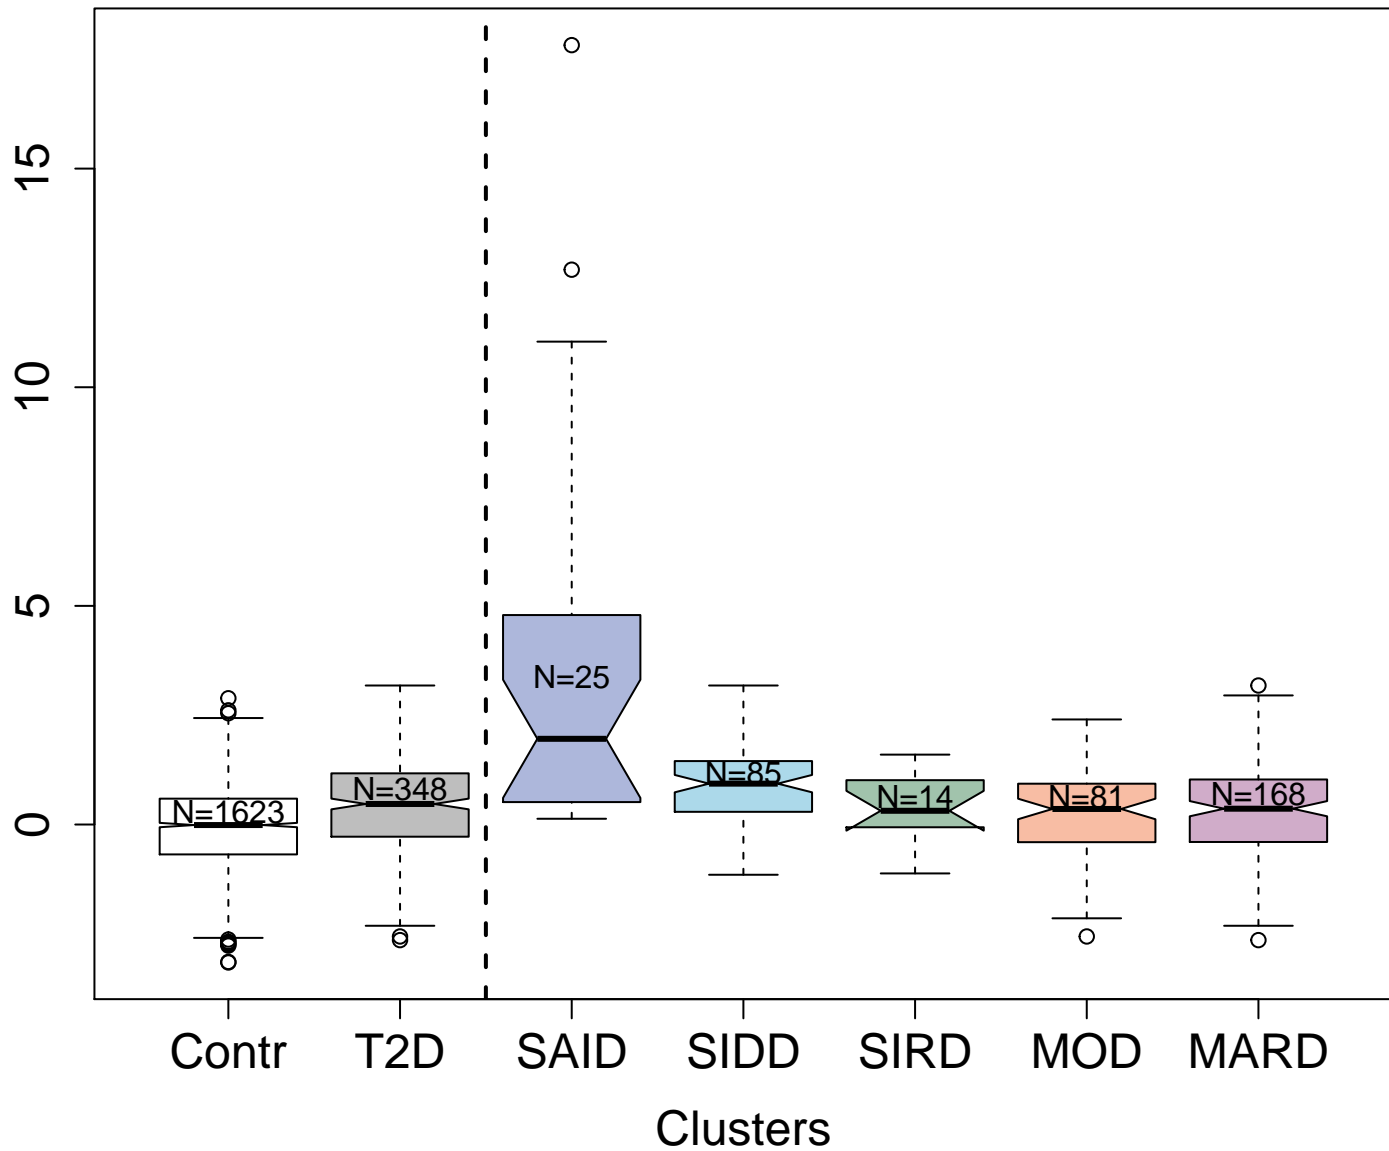

M47154 : sphingomyelin (d18:2/14:0, d18:1/14:1)\*

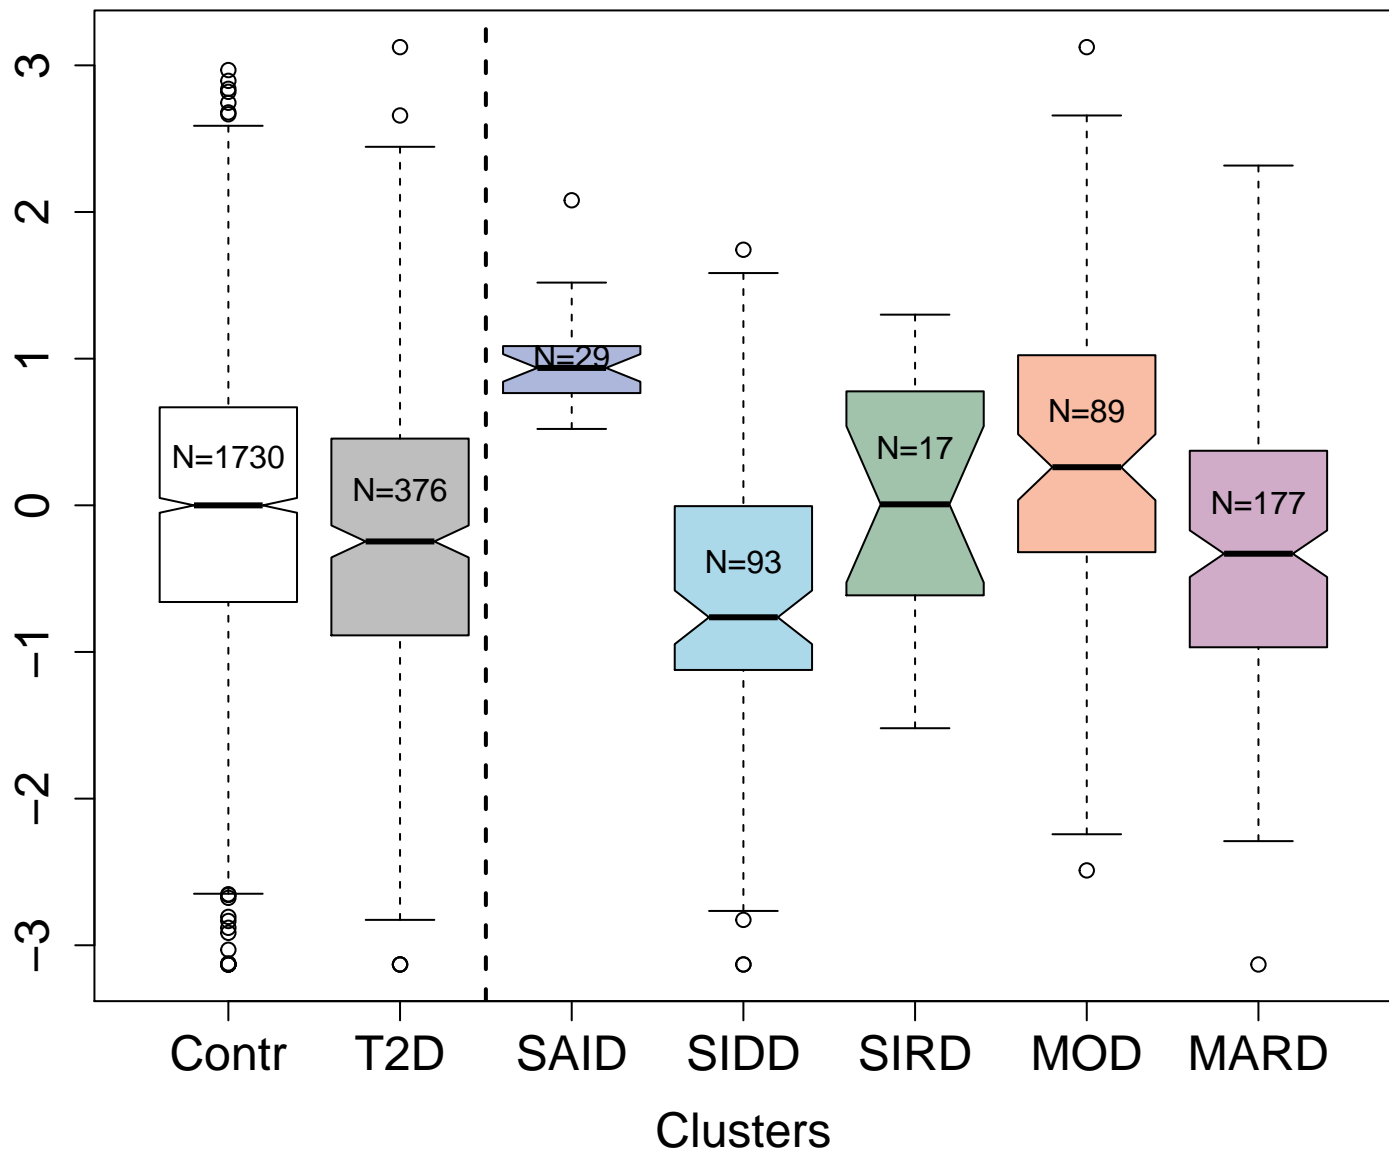

M48076 : X - 22771

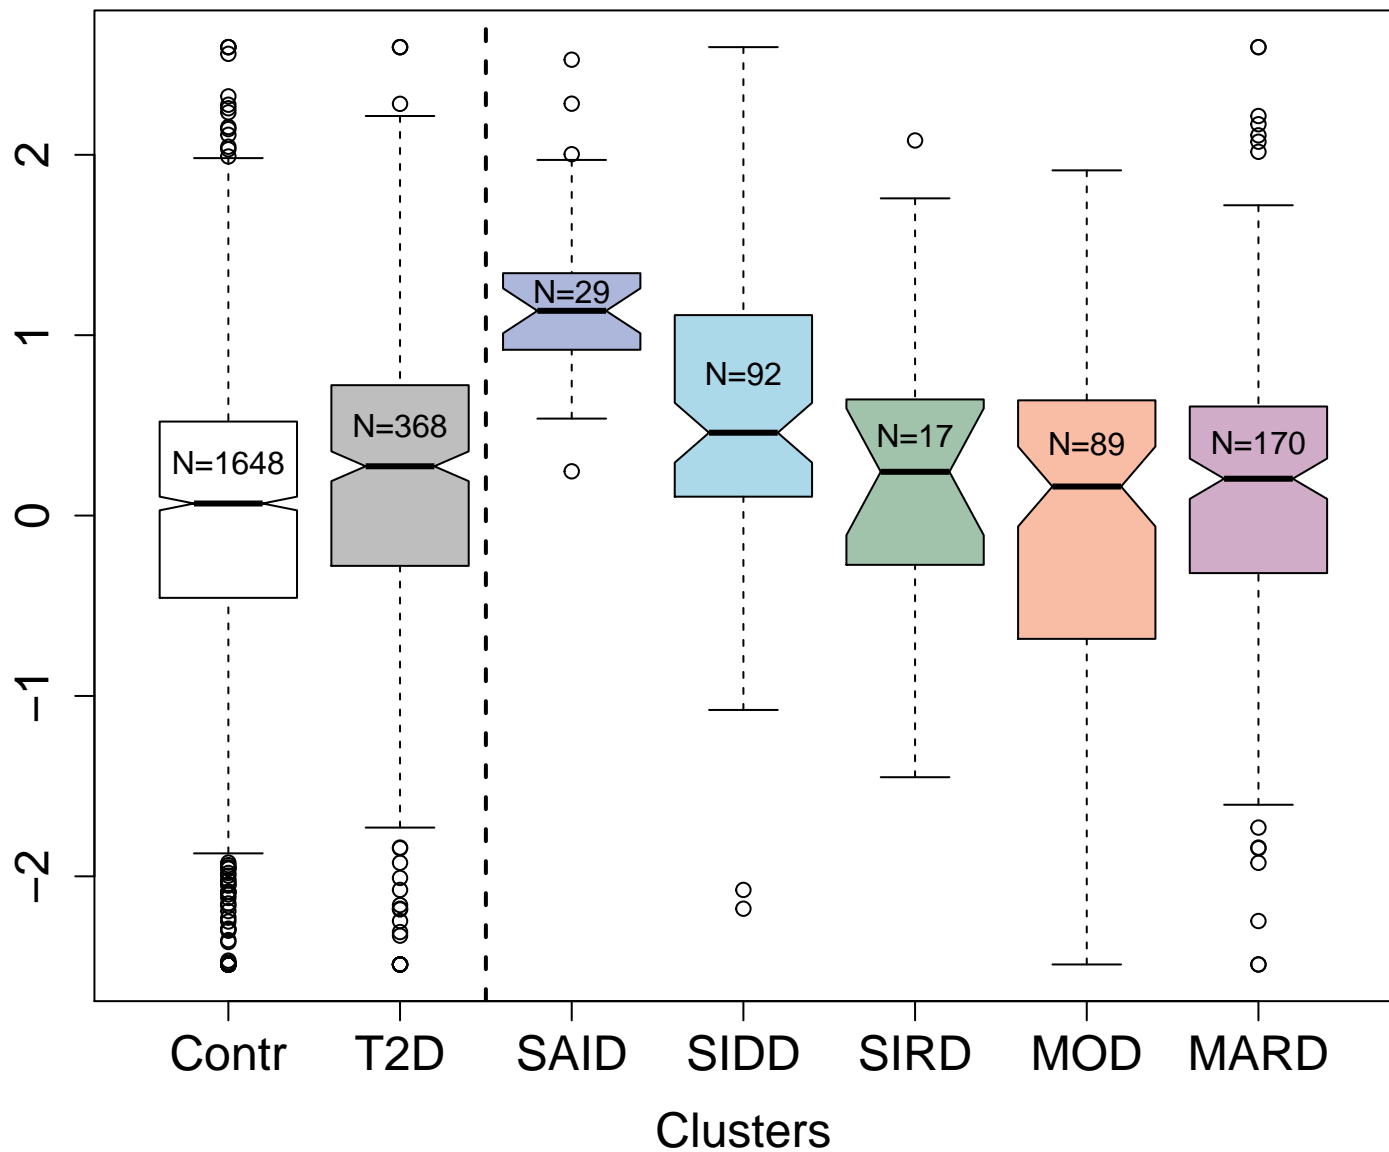

M18245 : gamma-glutamylhistidine

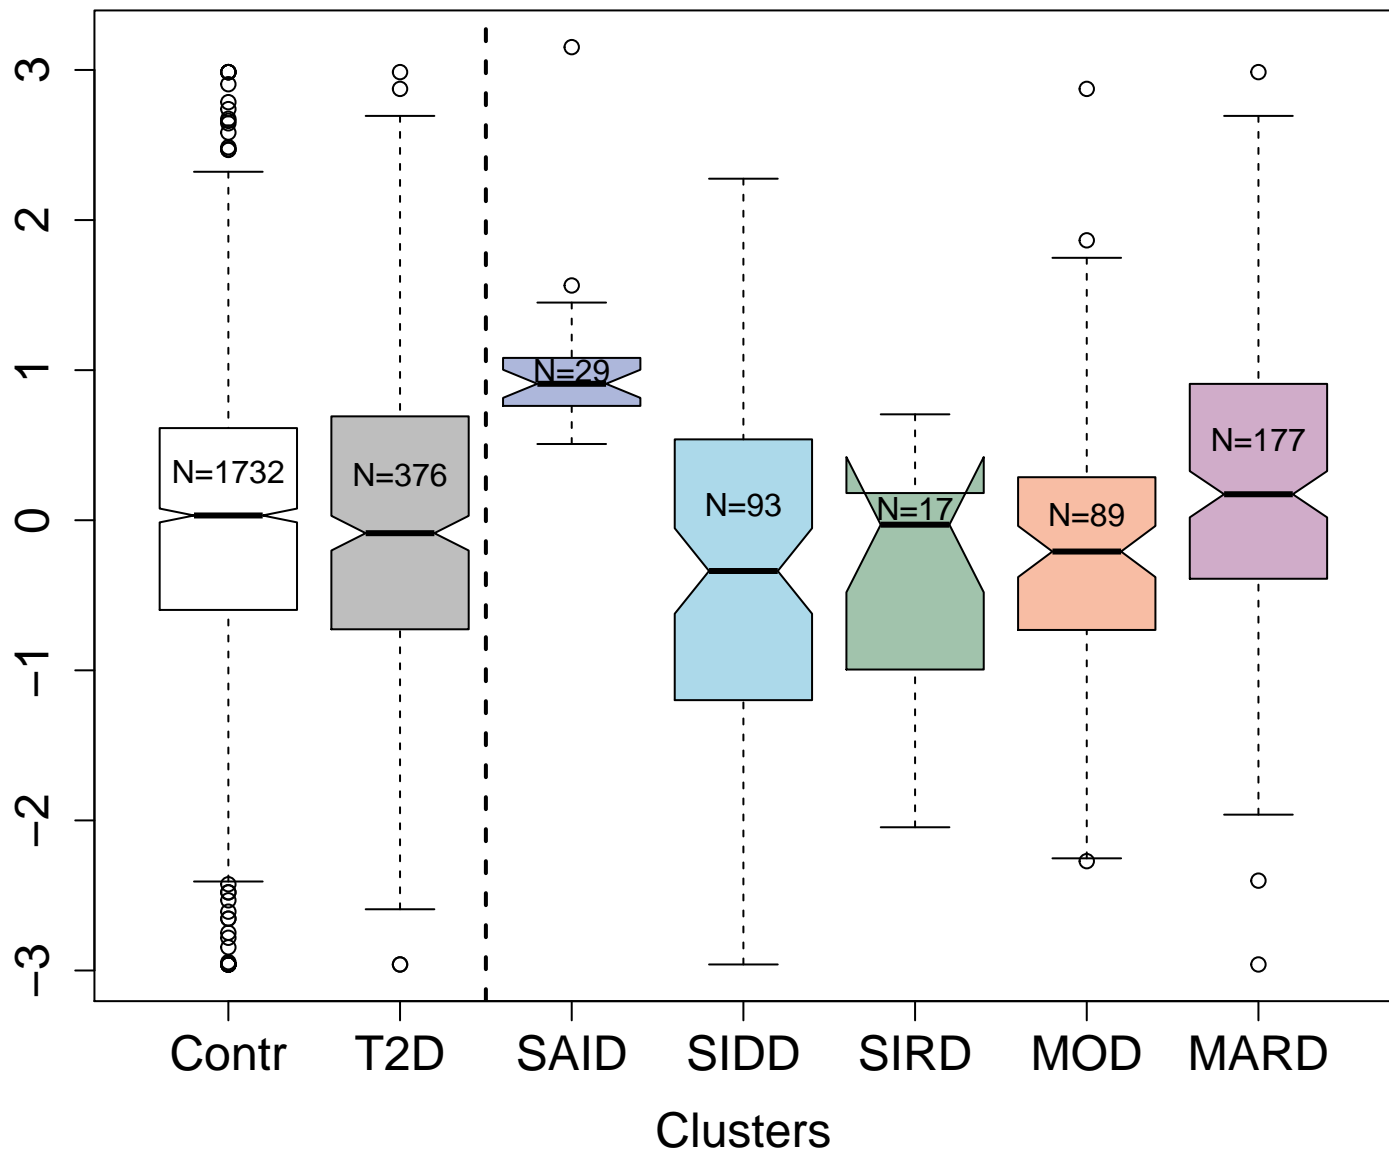

M46620 : X - 12462

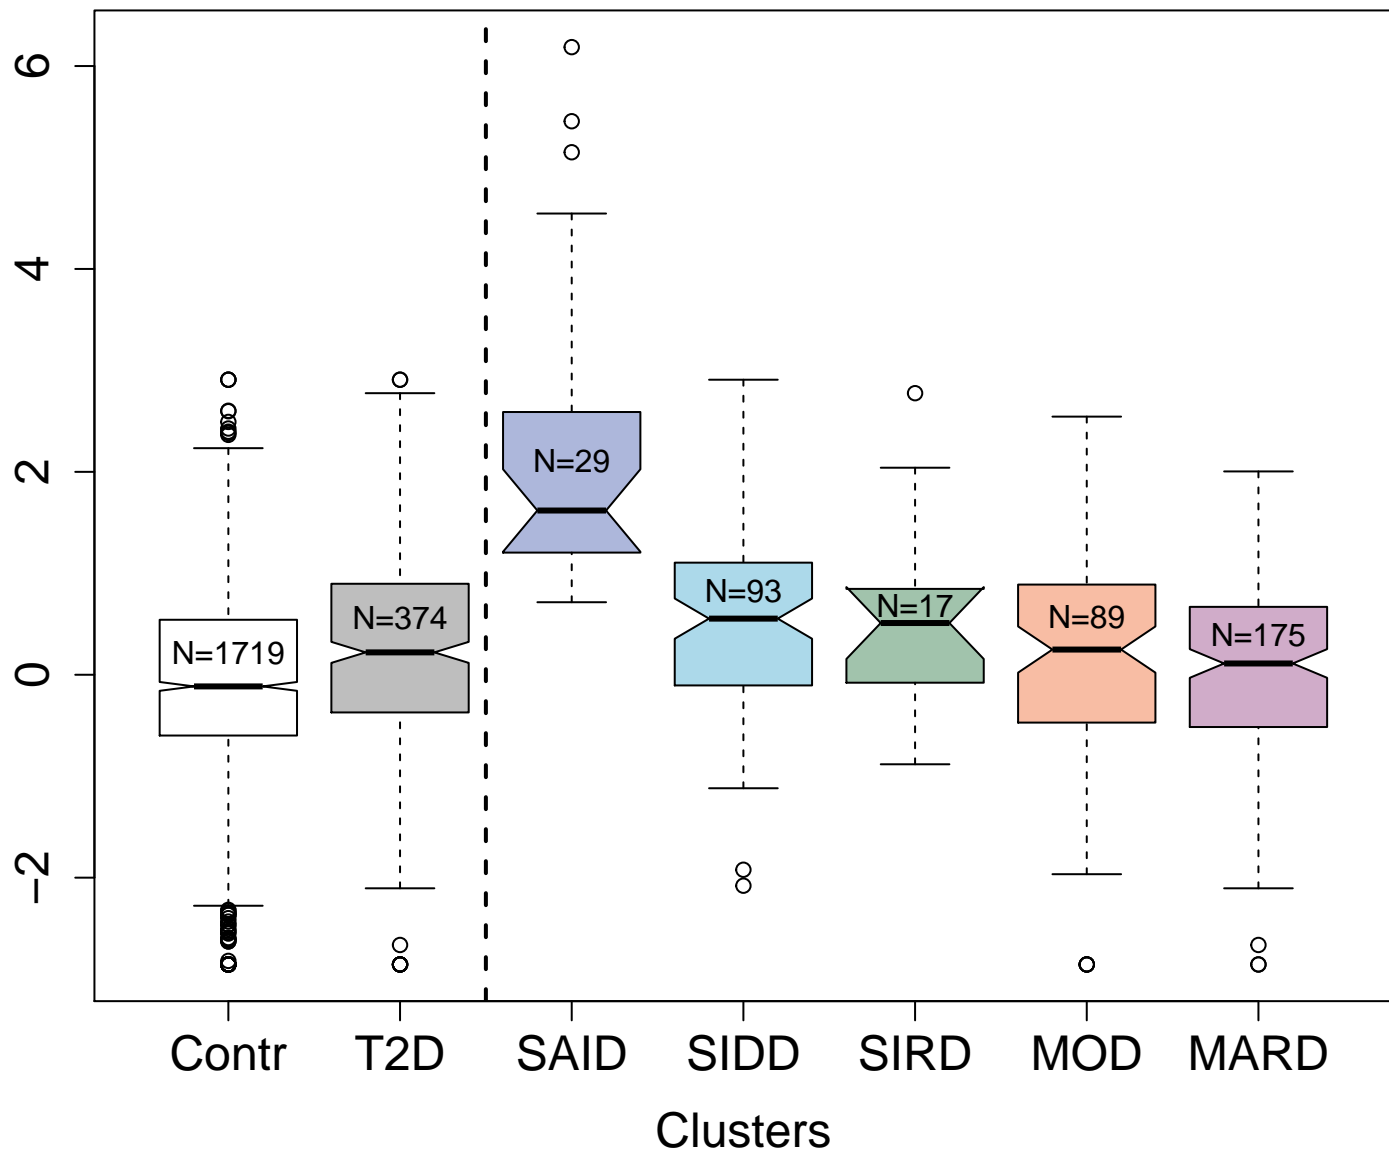



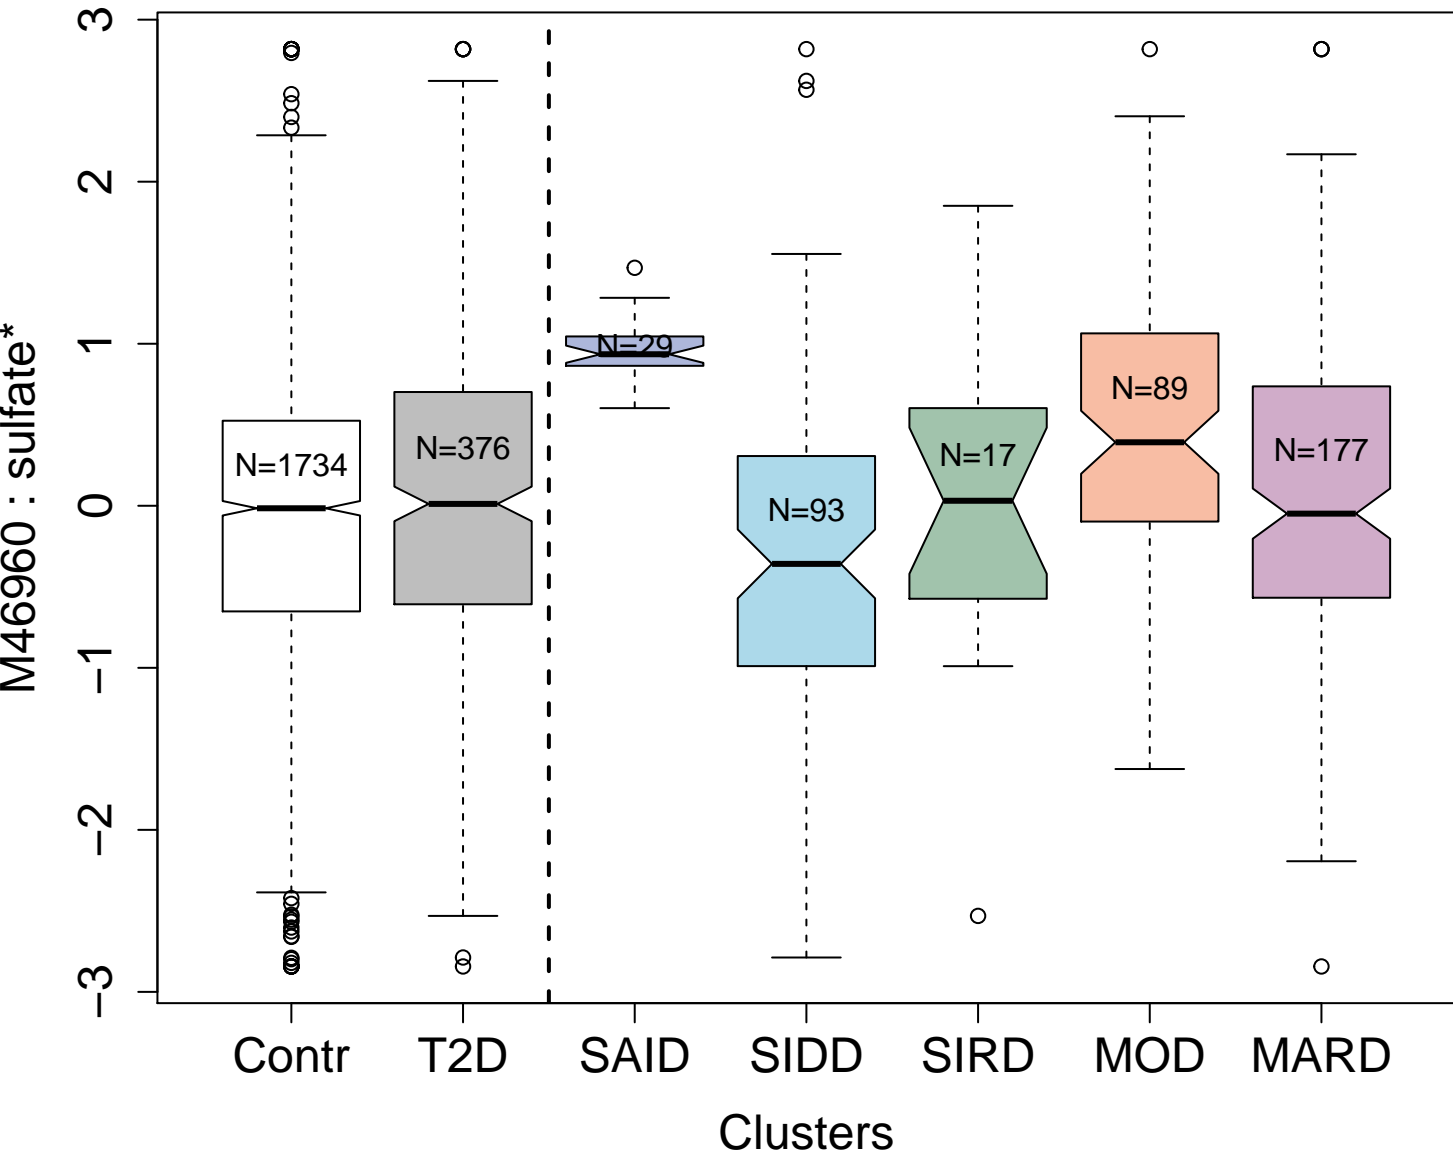

M37097 : tryptophan betaine

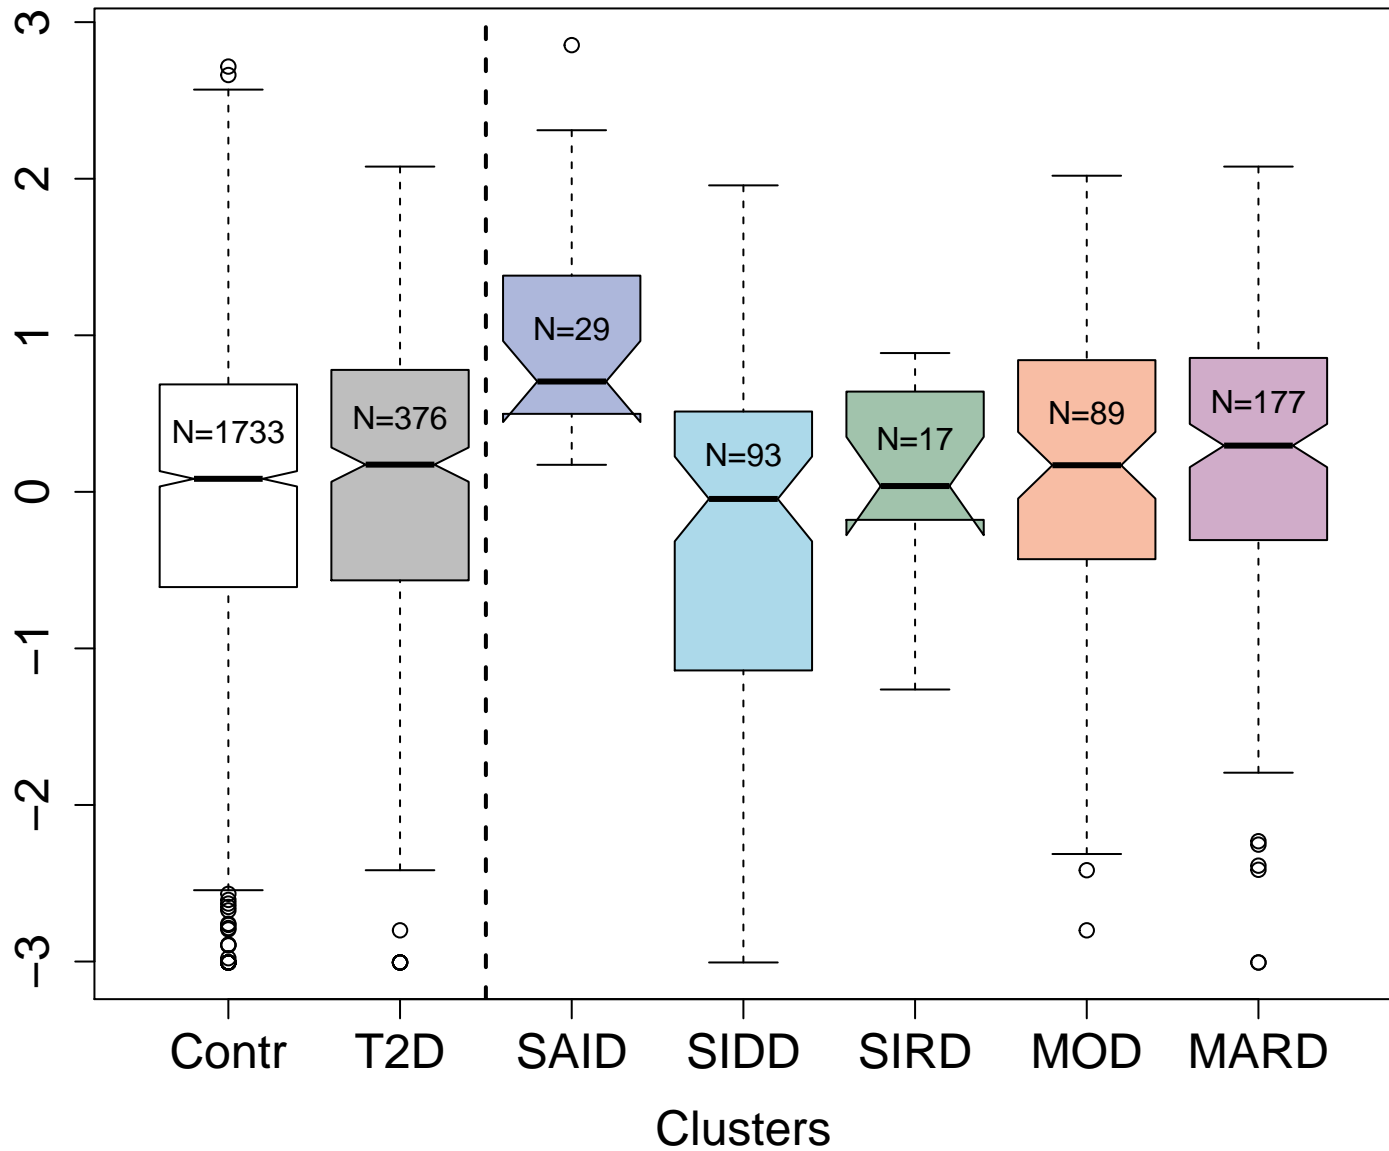

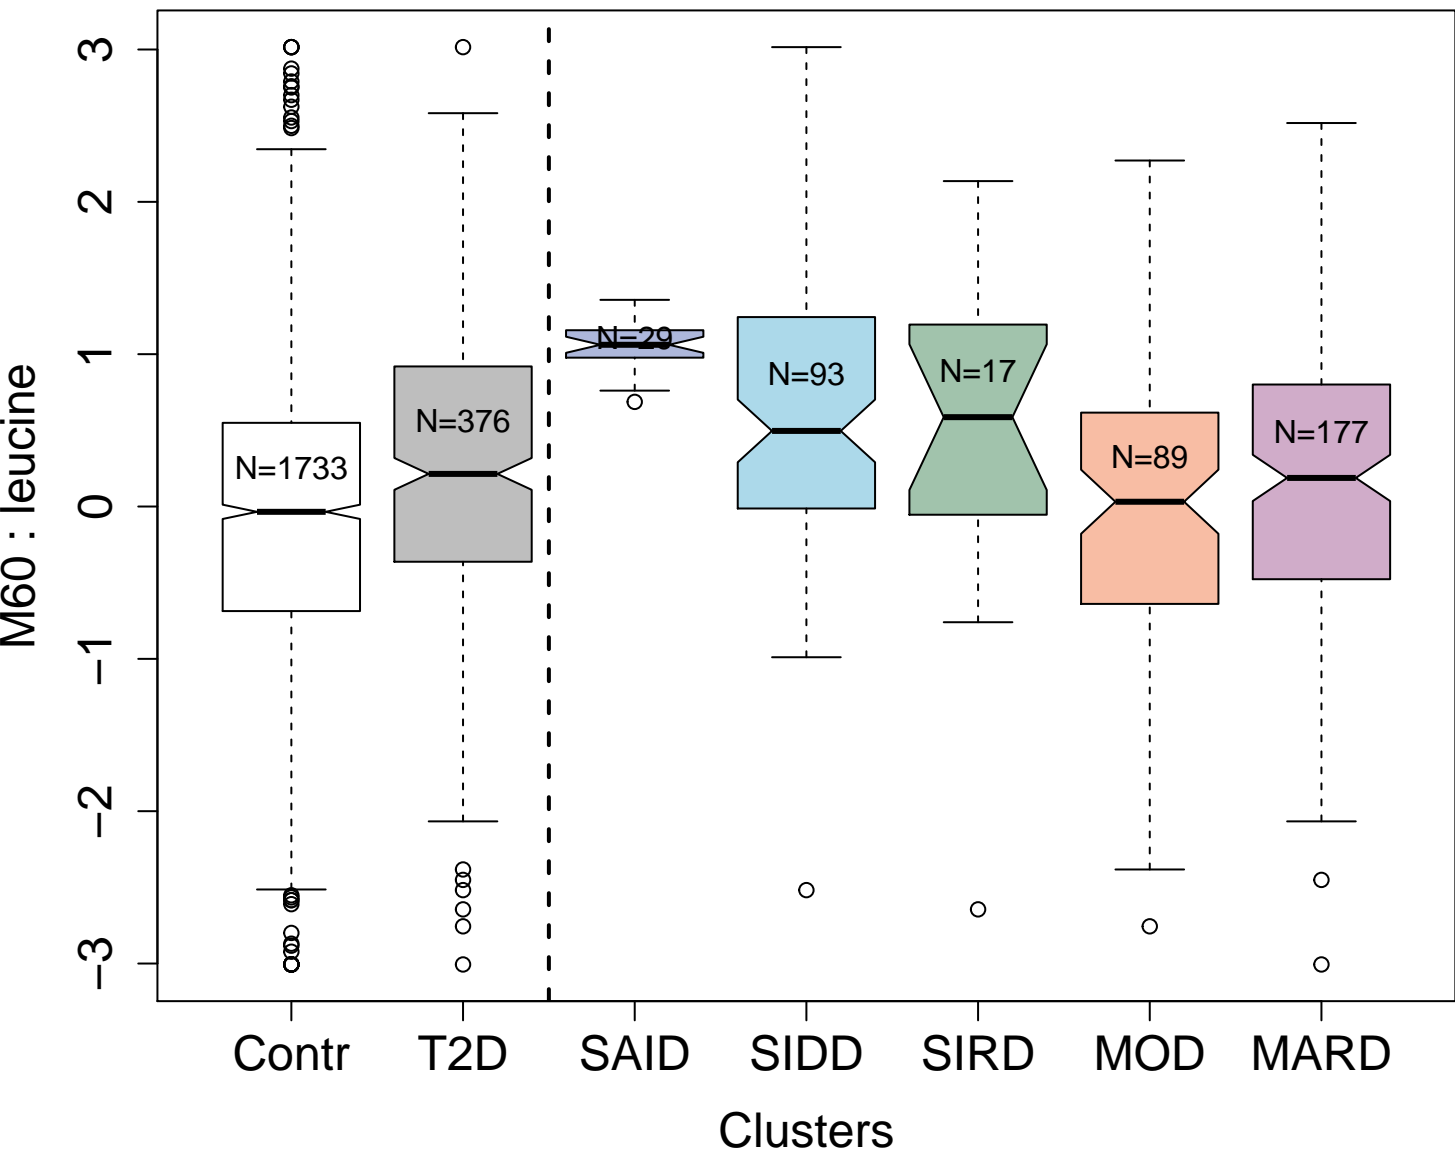

M44872 : gamma-glutamylmethionine

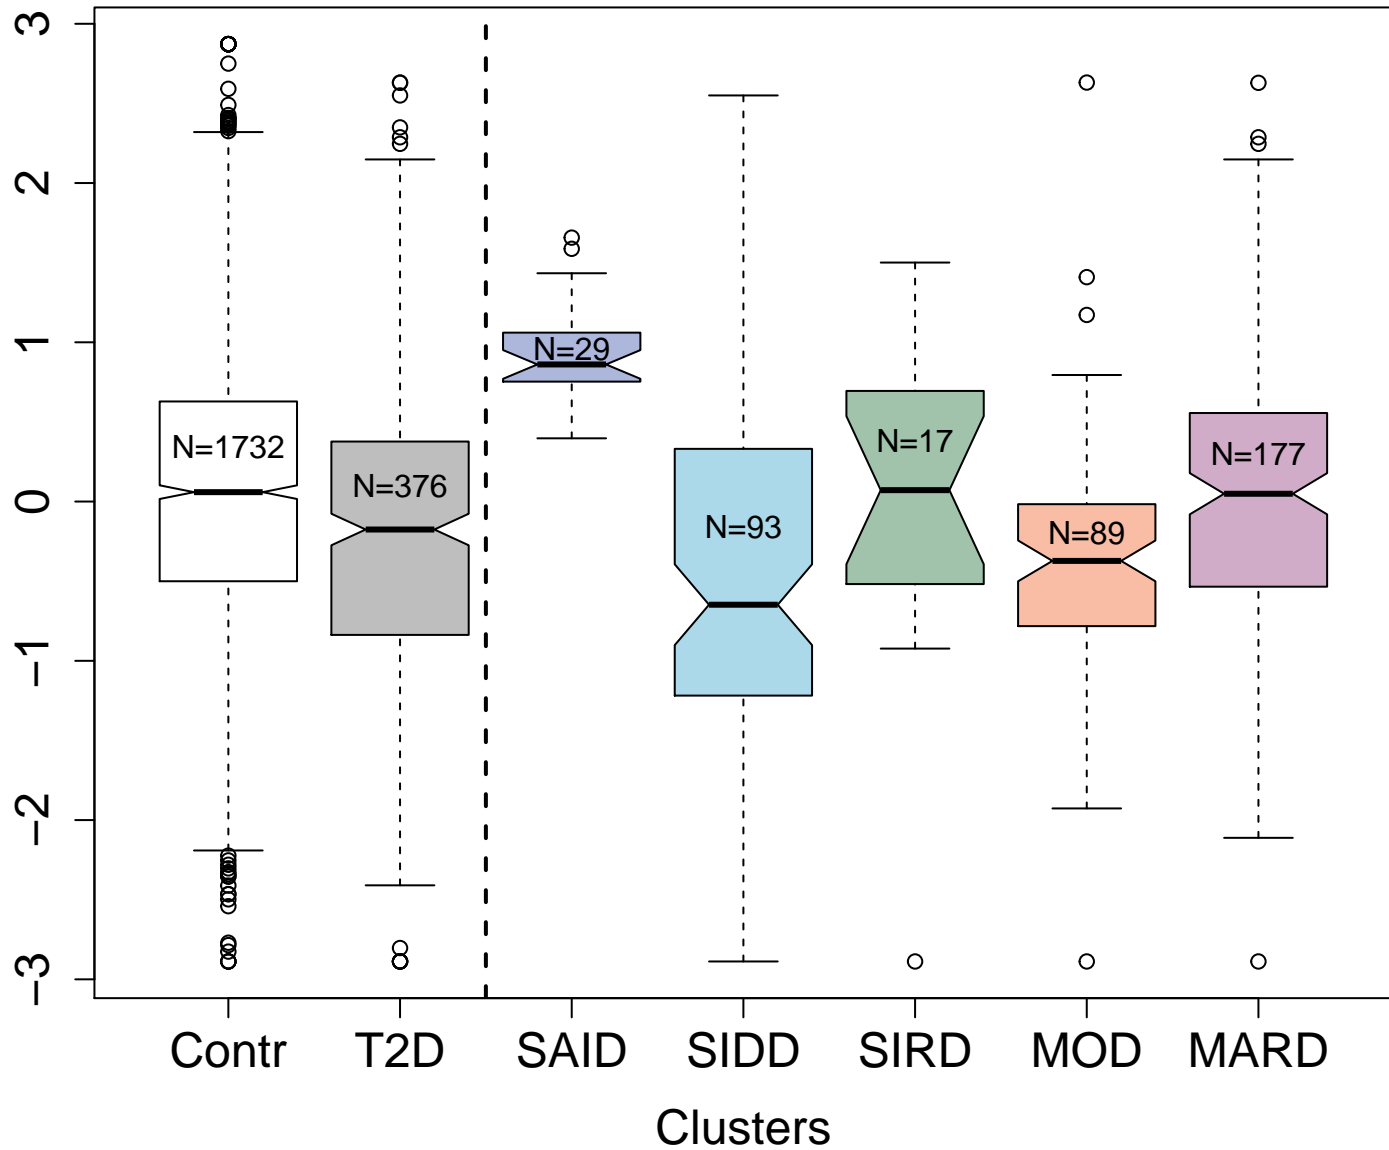

M47437 : X - 12680

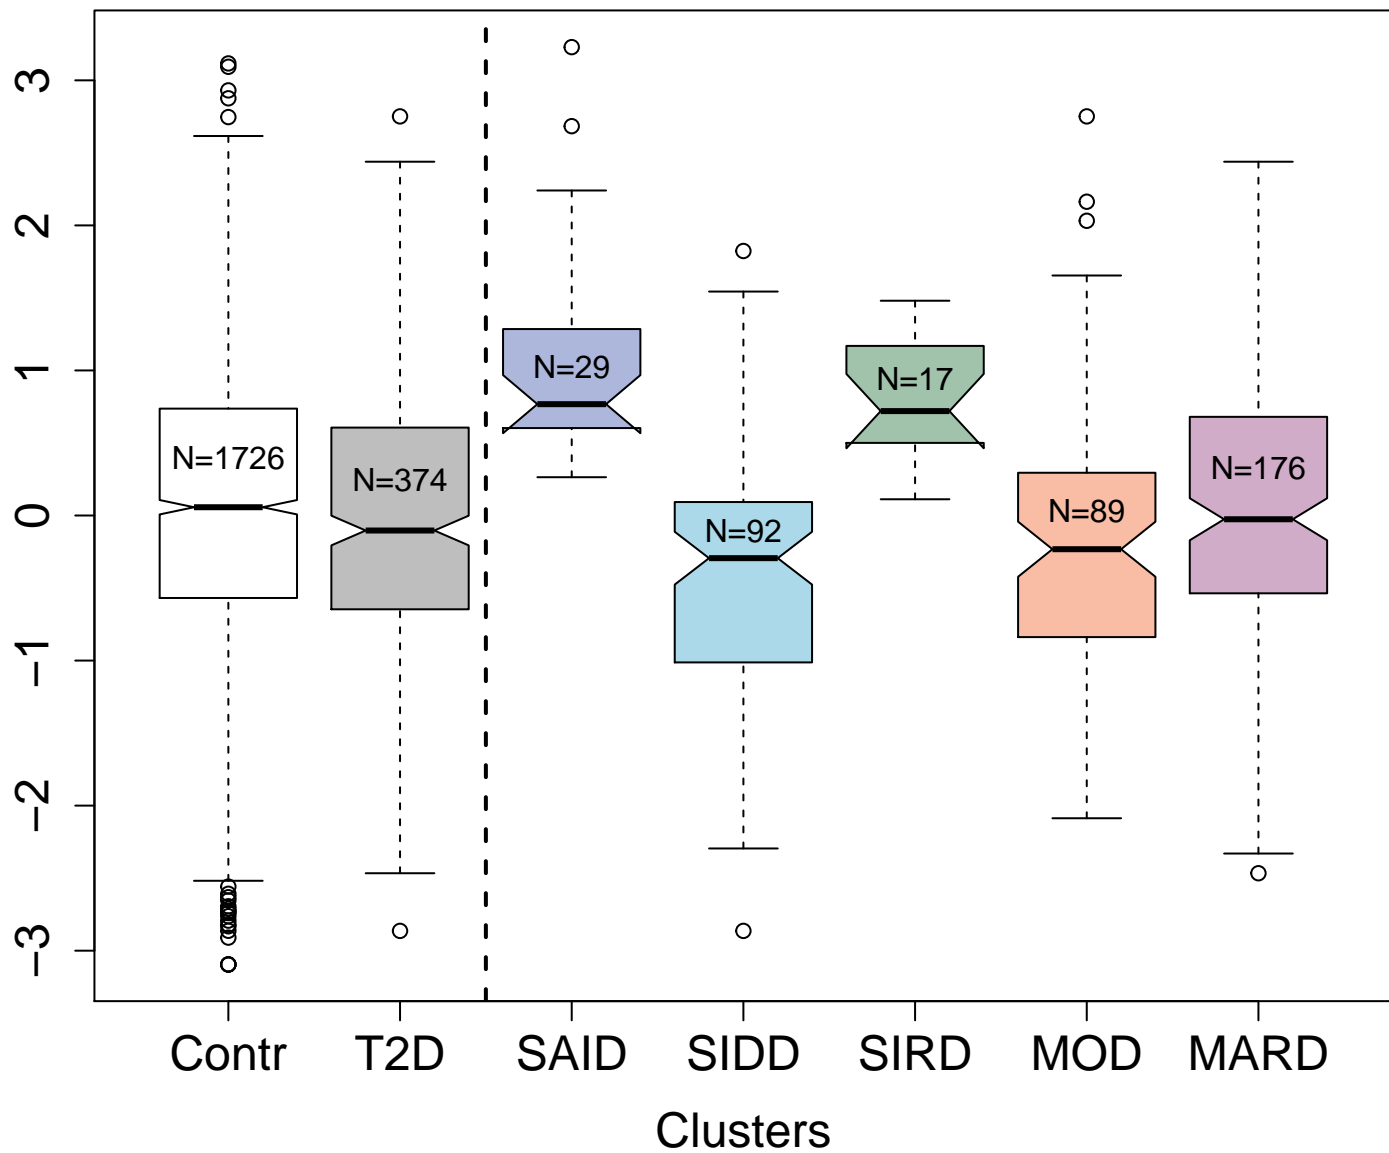

M46356 : X - 21312

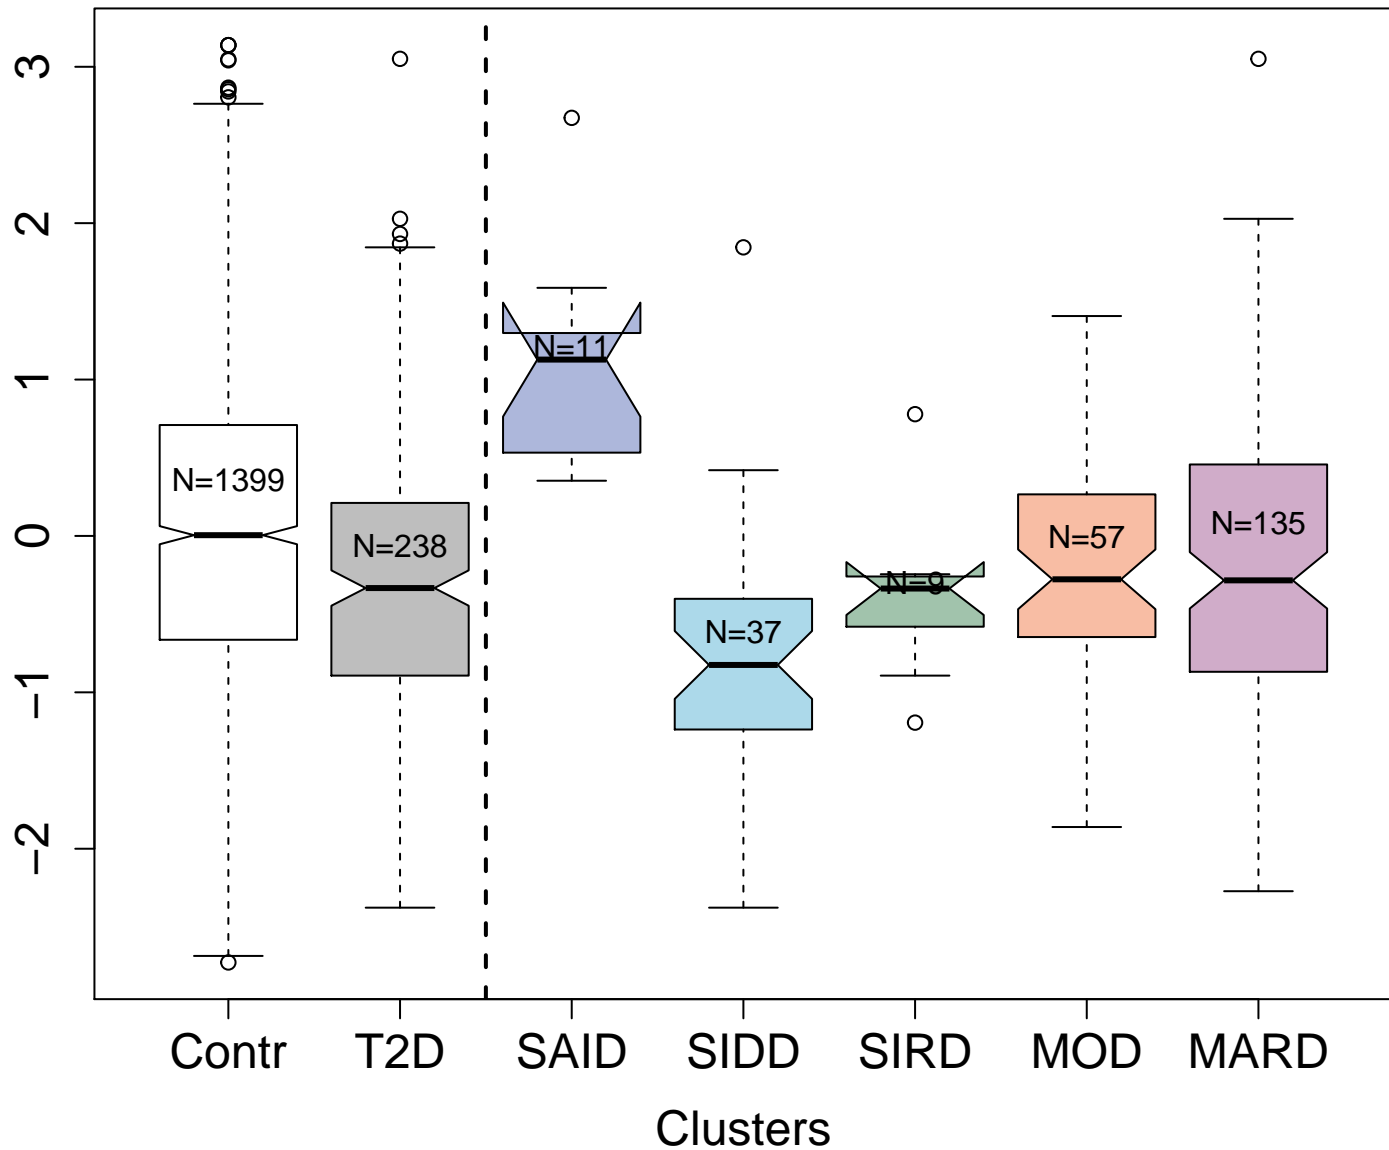

M1284 : threonine

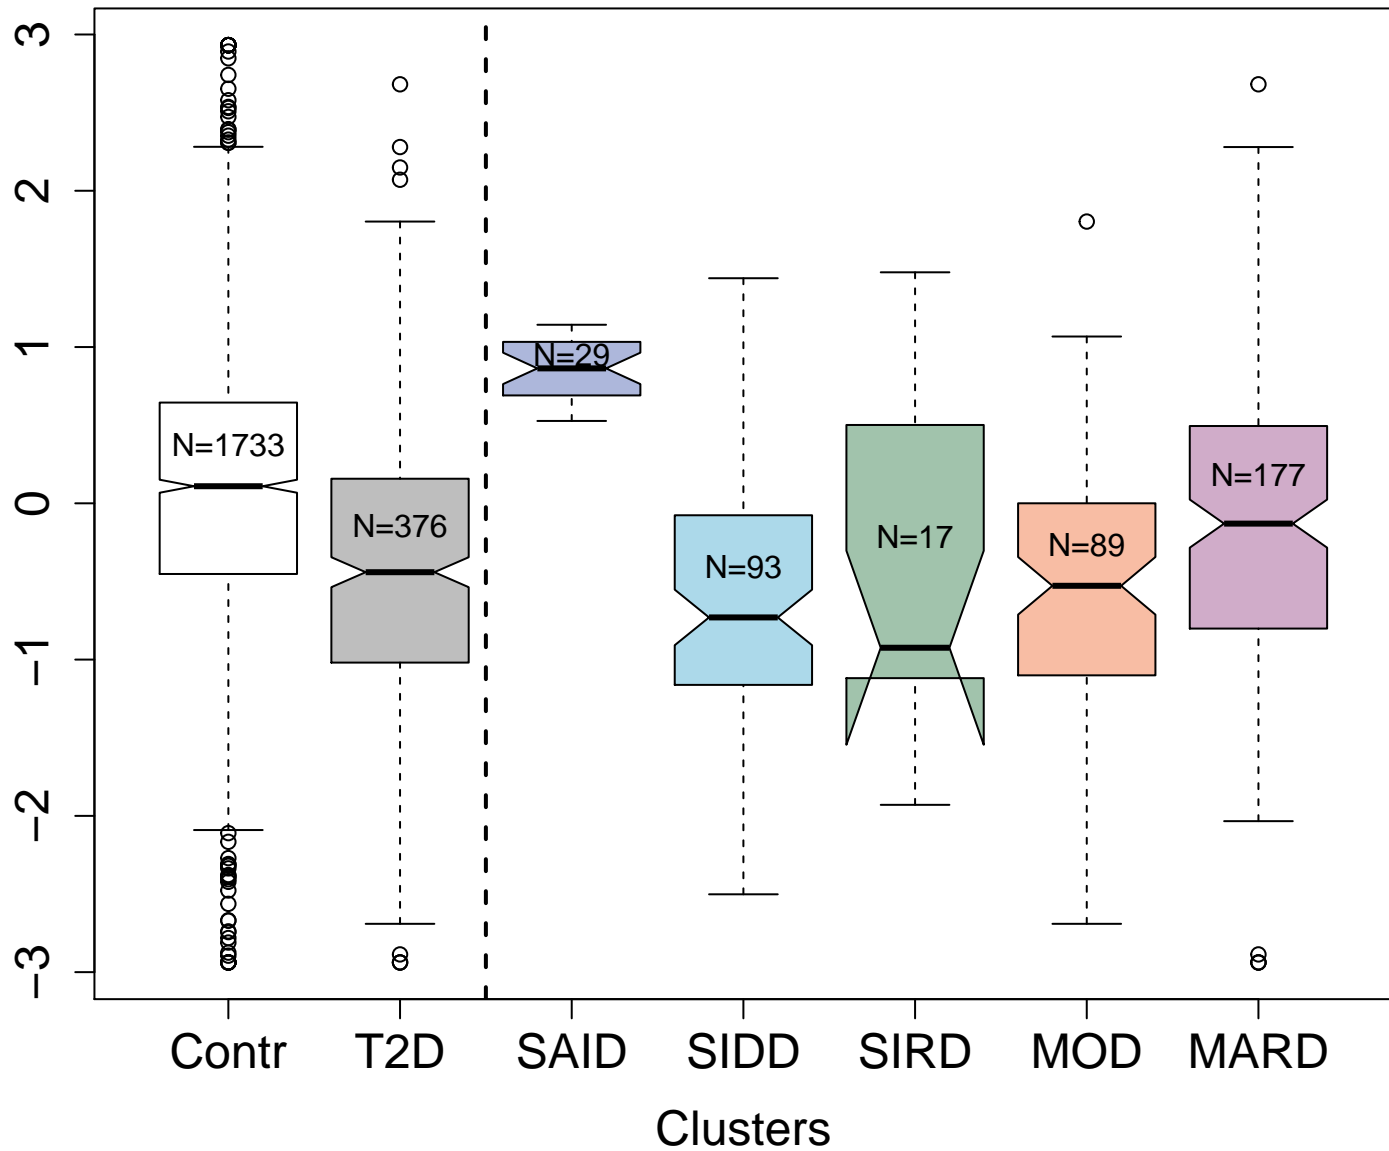

M43424 : dimethyl sulfone

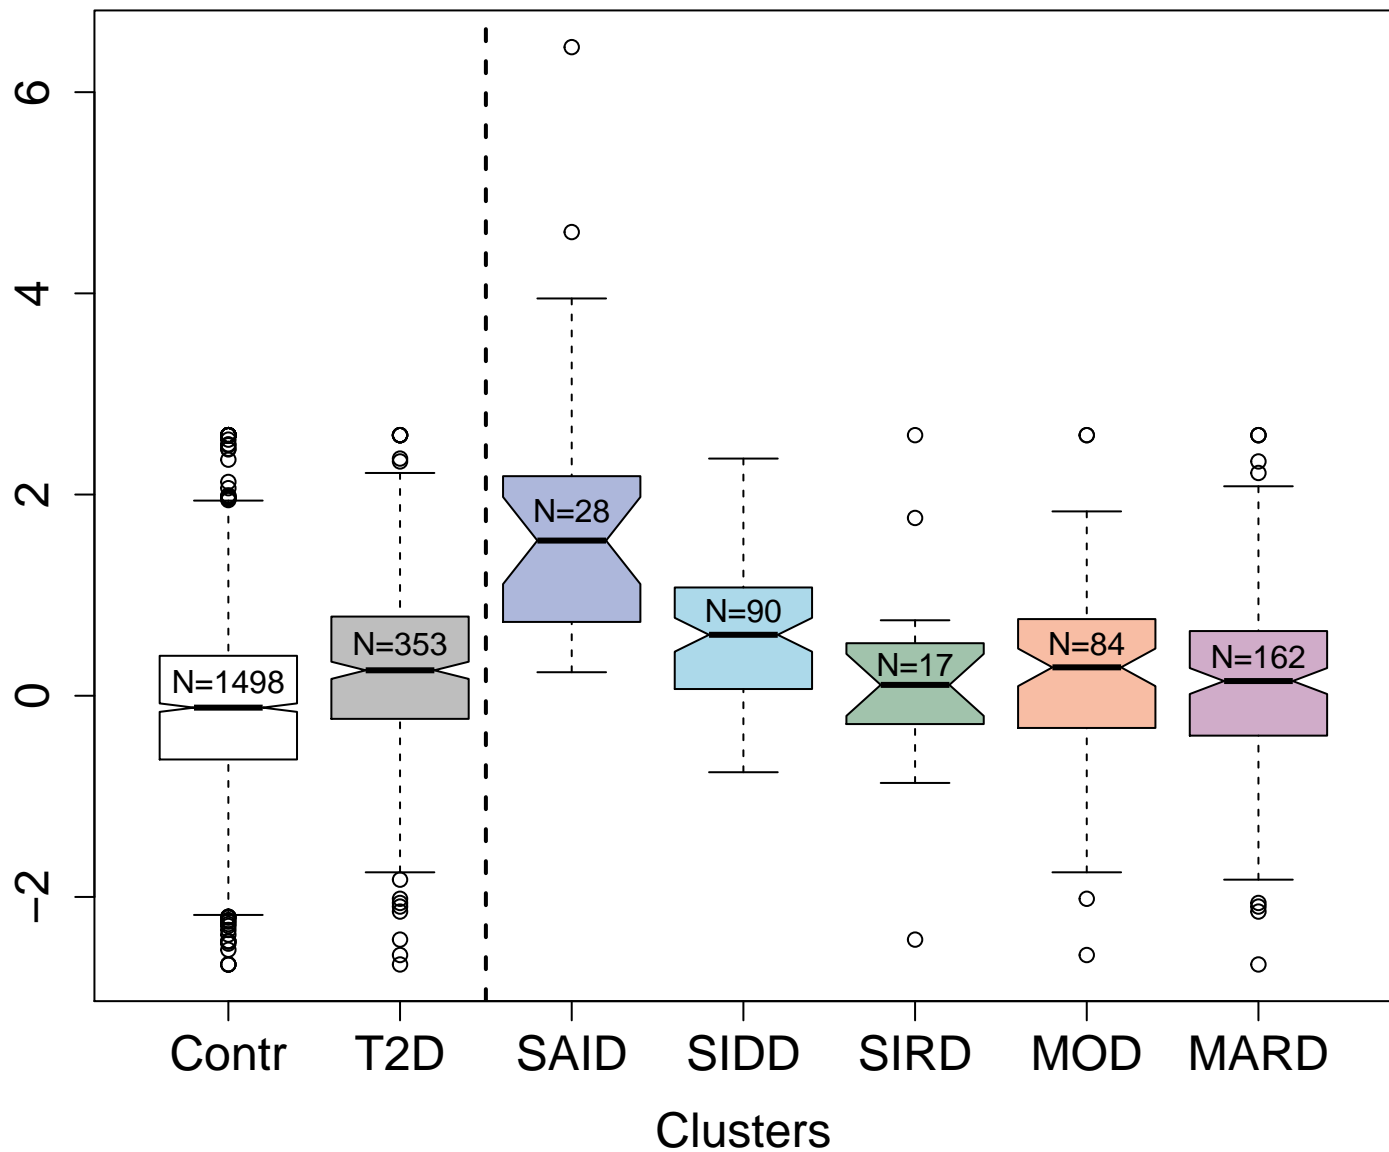



M47510 : X - 12027

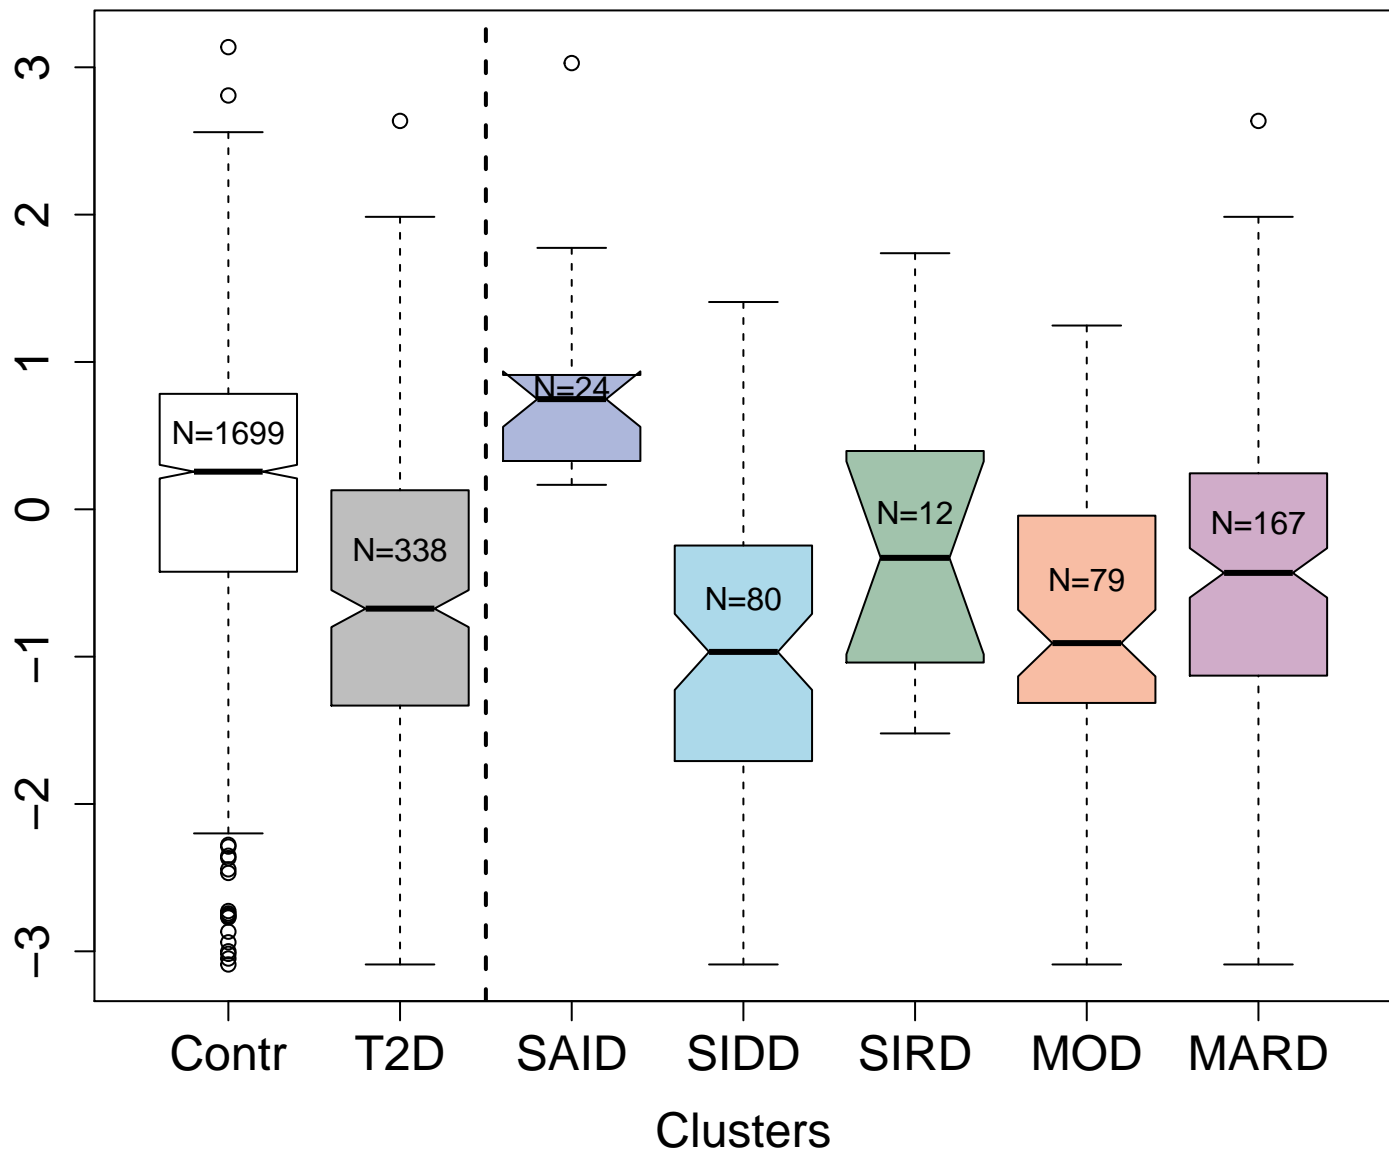

M62924 : 3-(3-amino-3-carboxopropyl)uridine\*

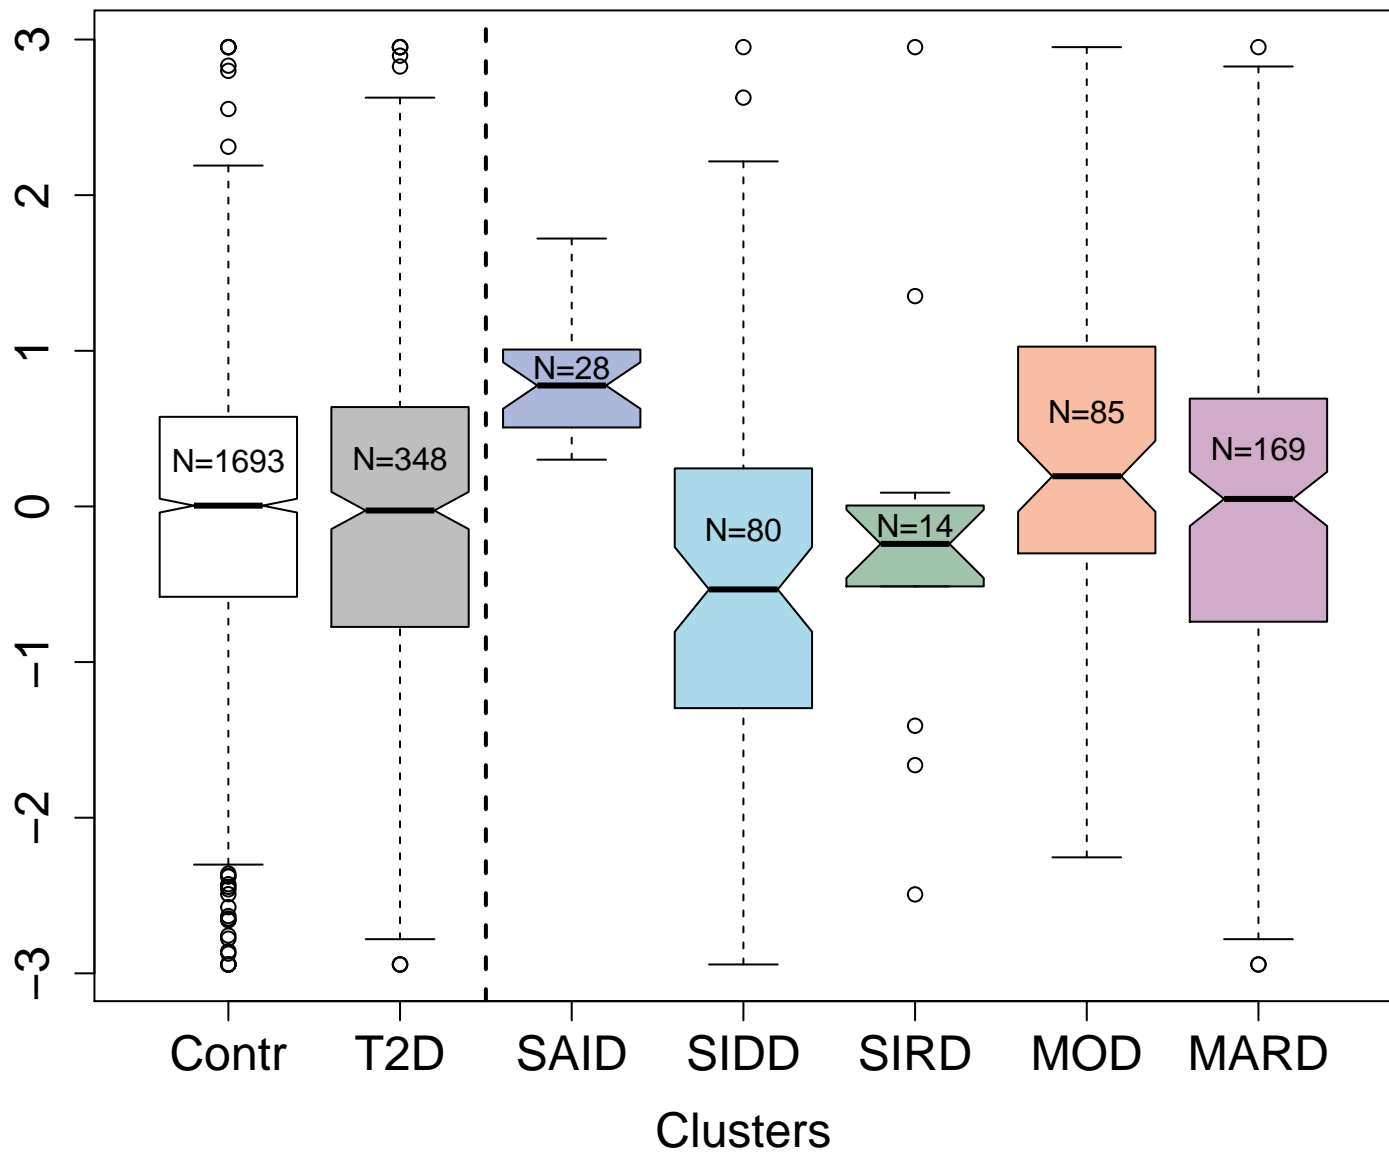

M53260 : oleoylcholine

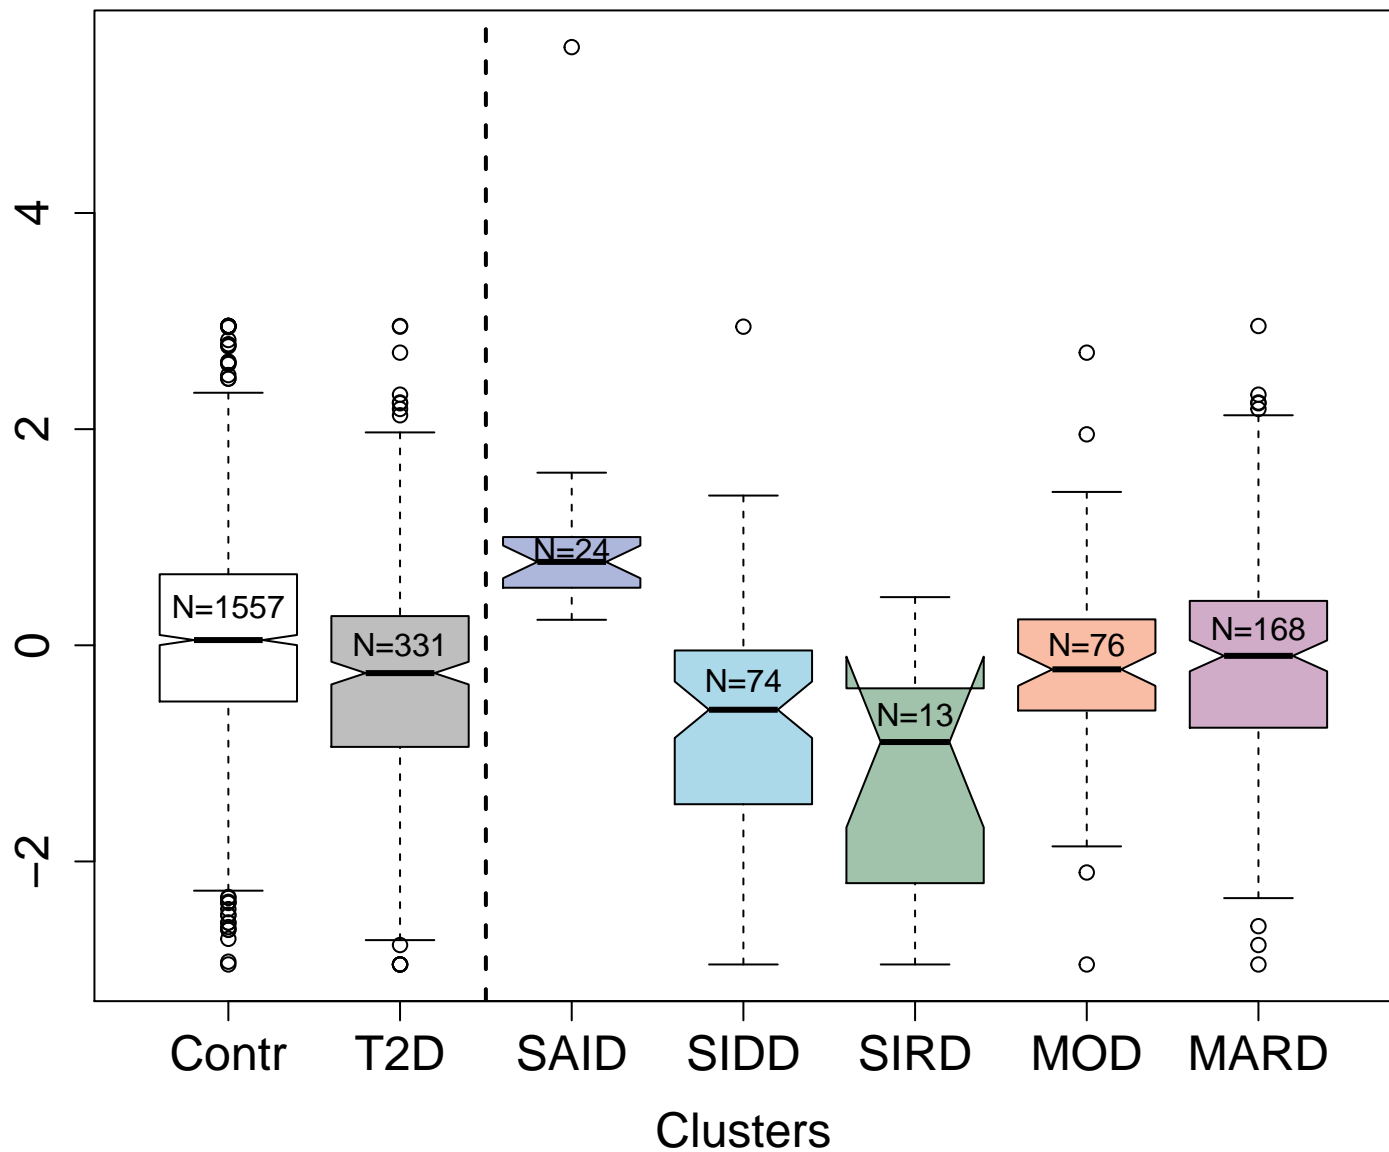

M1302 : methionine

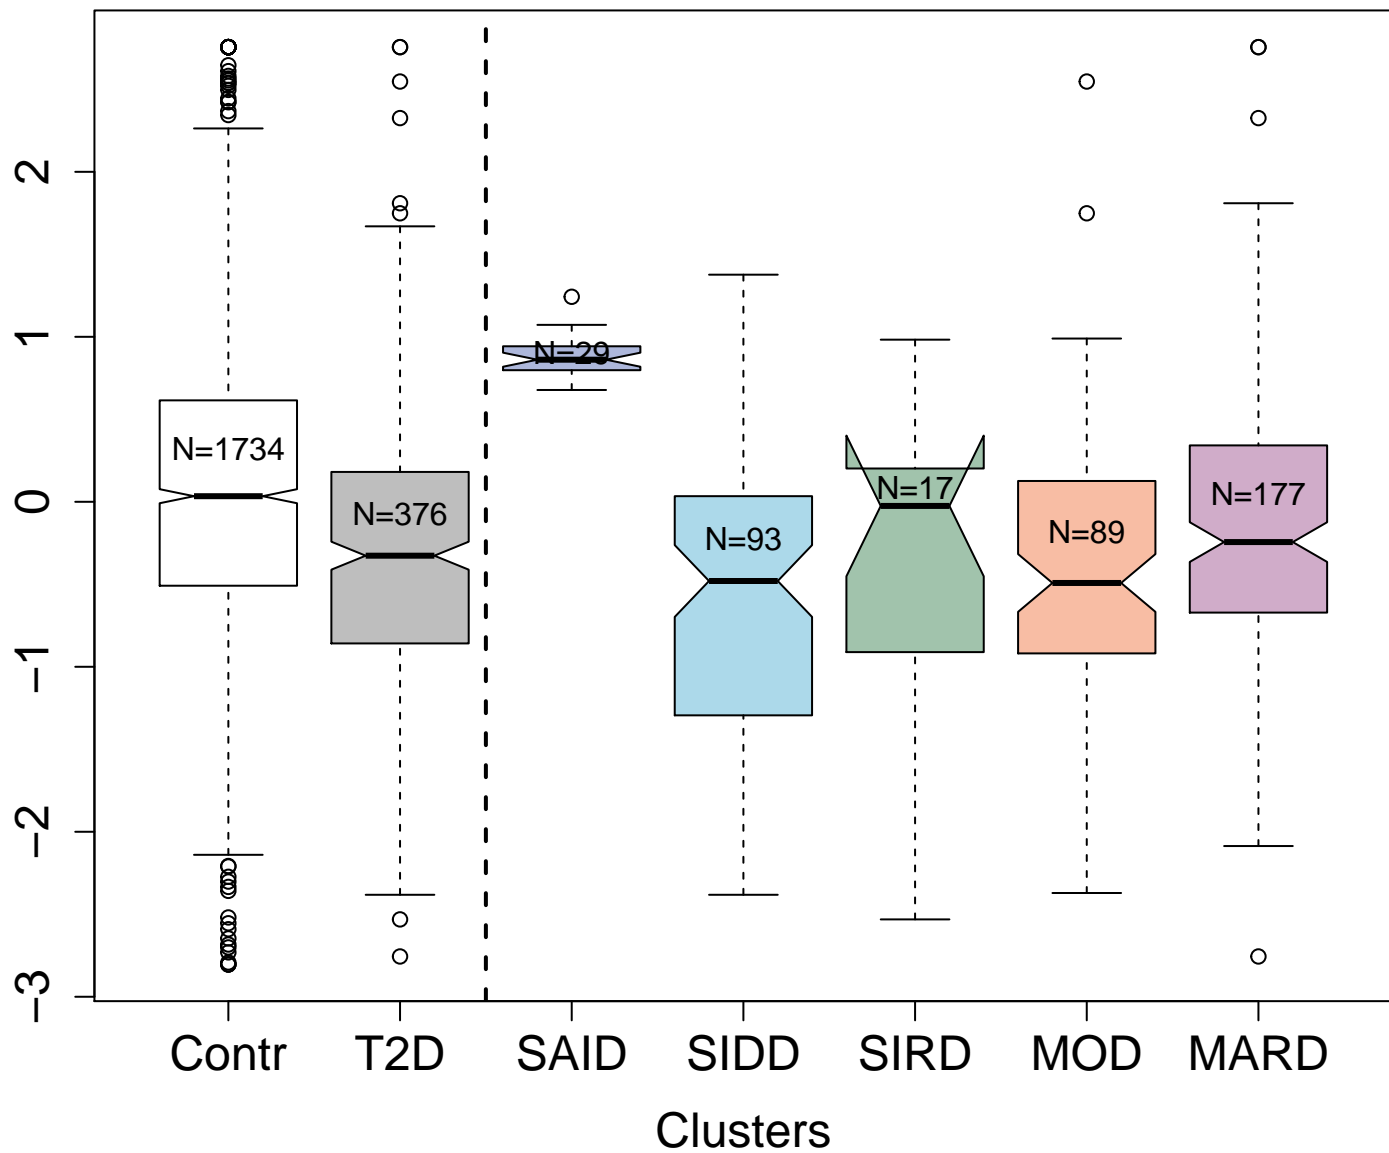

M35157 : N6-carbamoylthreonyladenosine

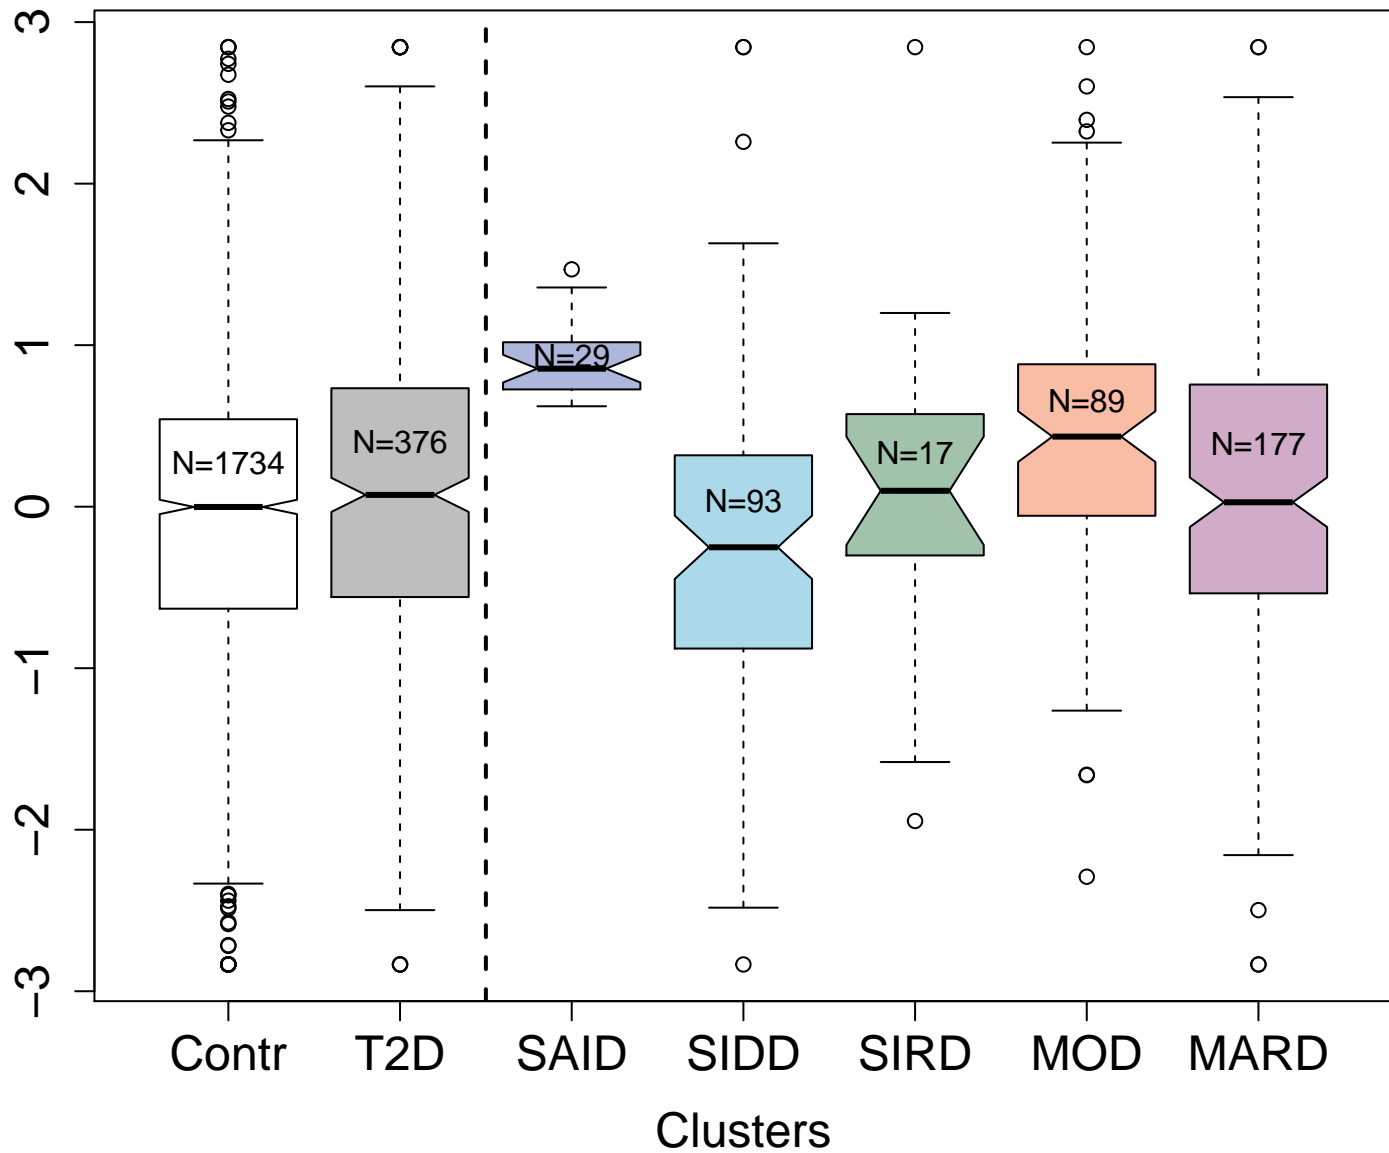

M61833 : 5,6-dihydrouridine

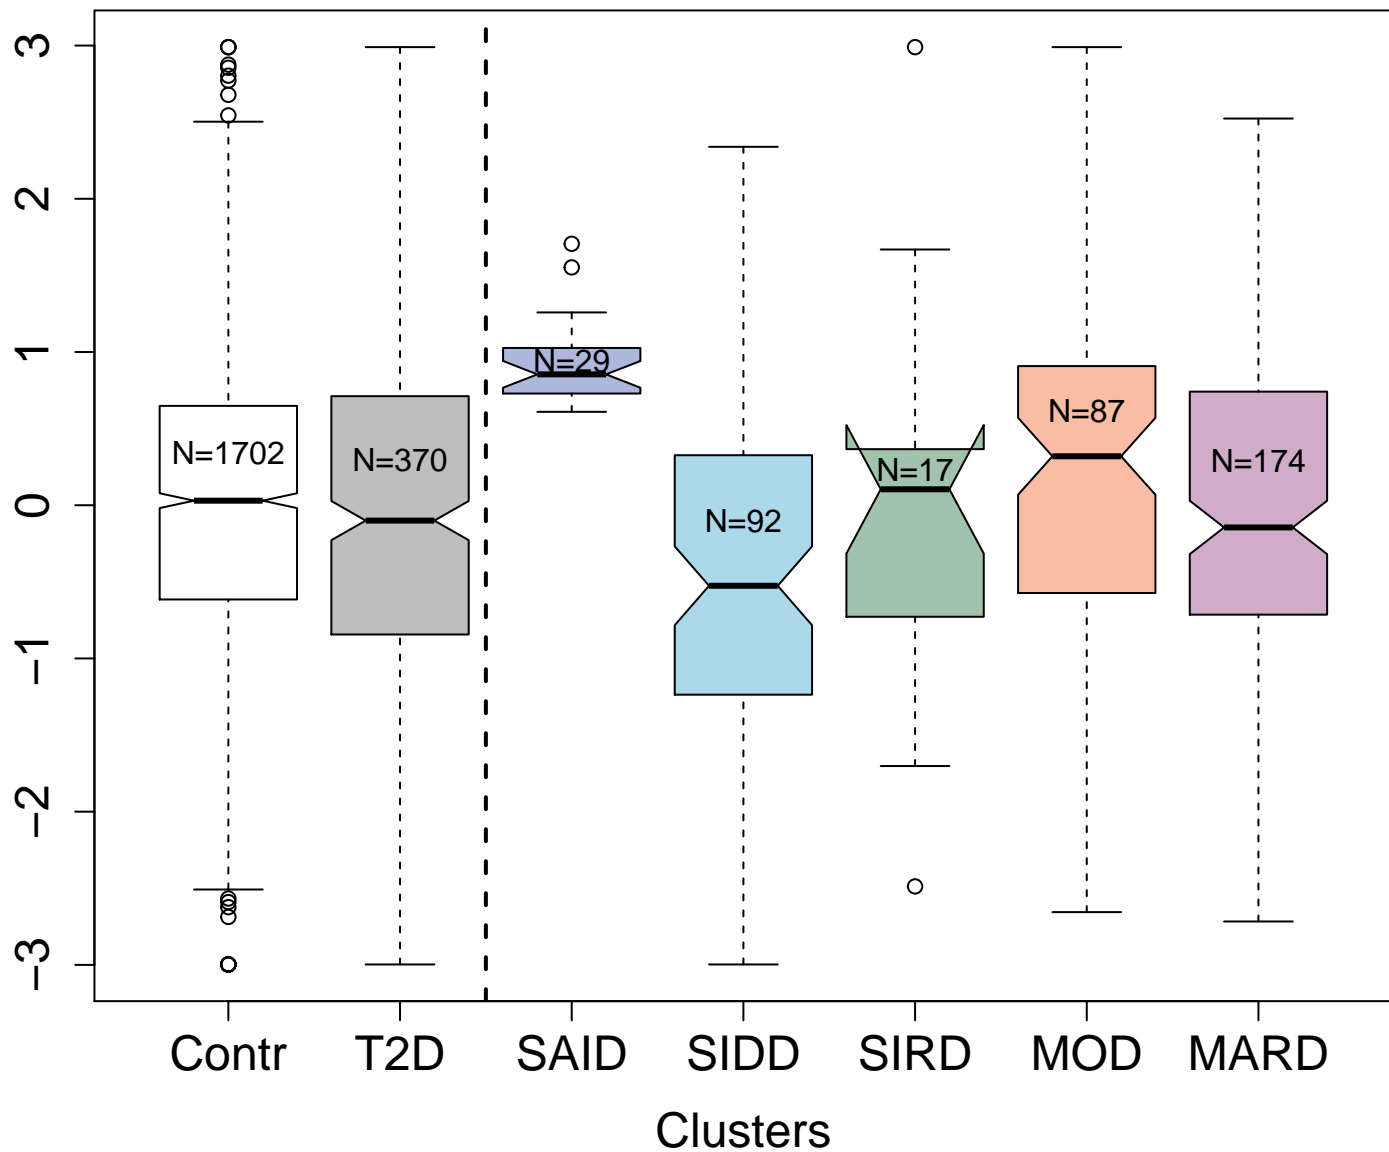

M33140 : X - 11795

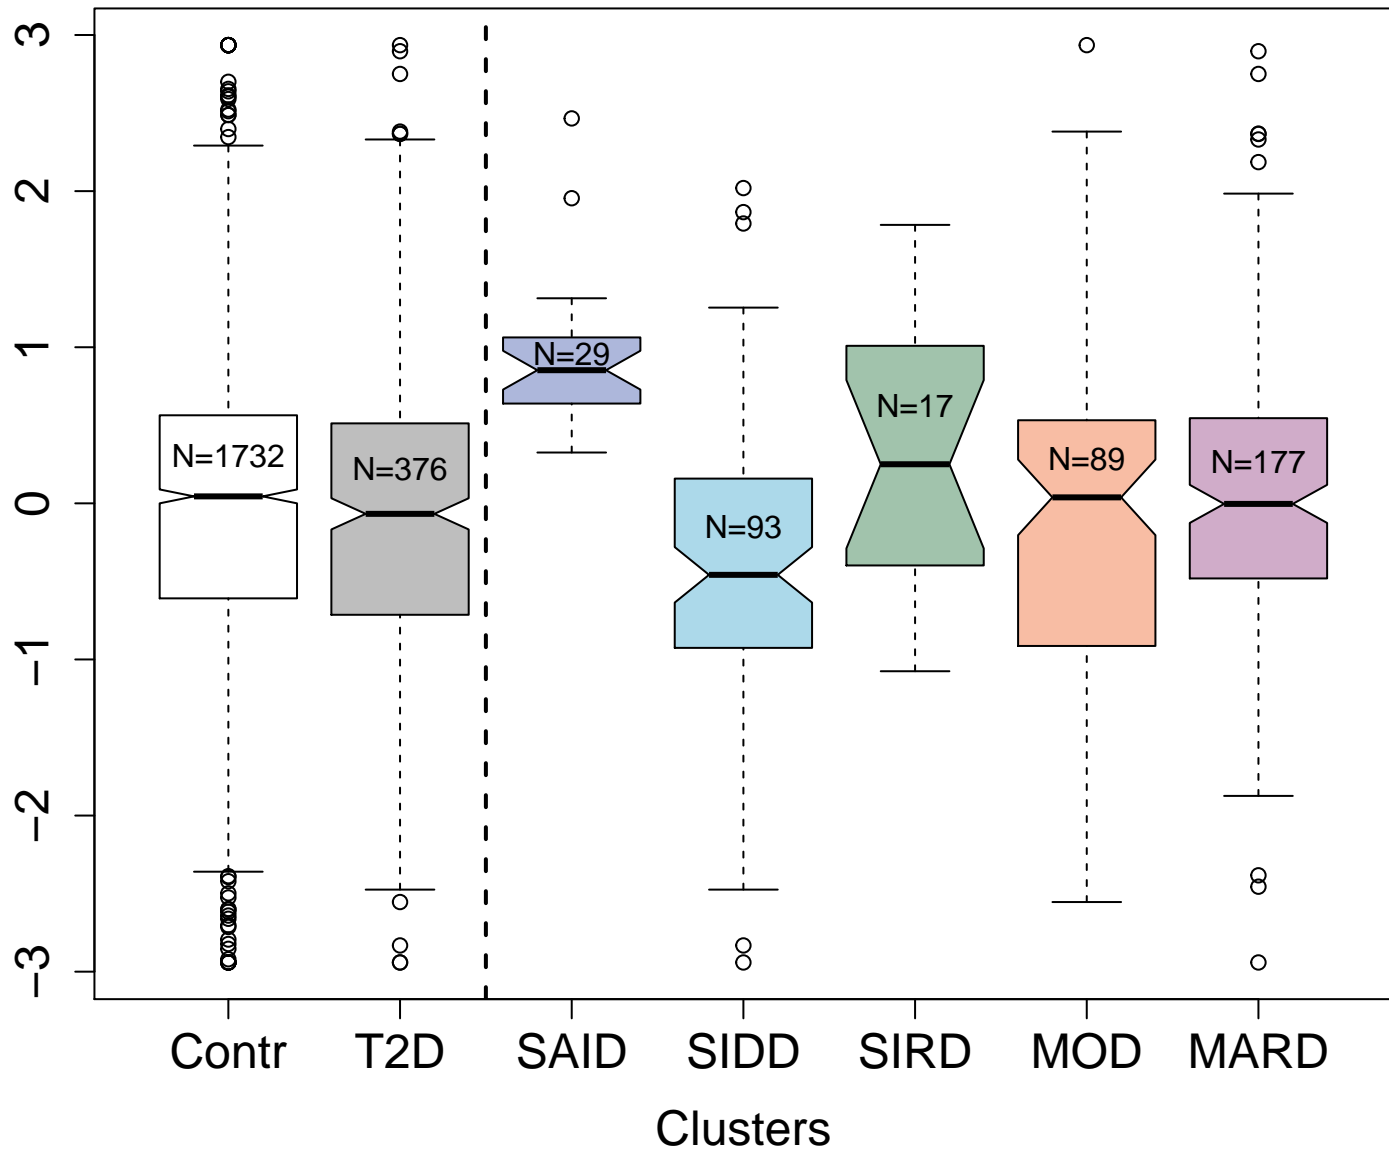

M15506 : choline

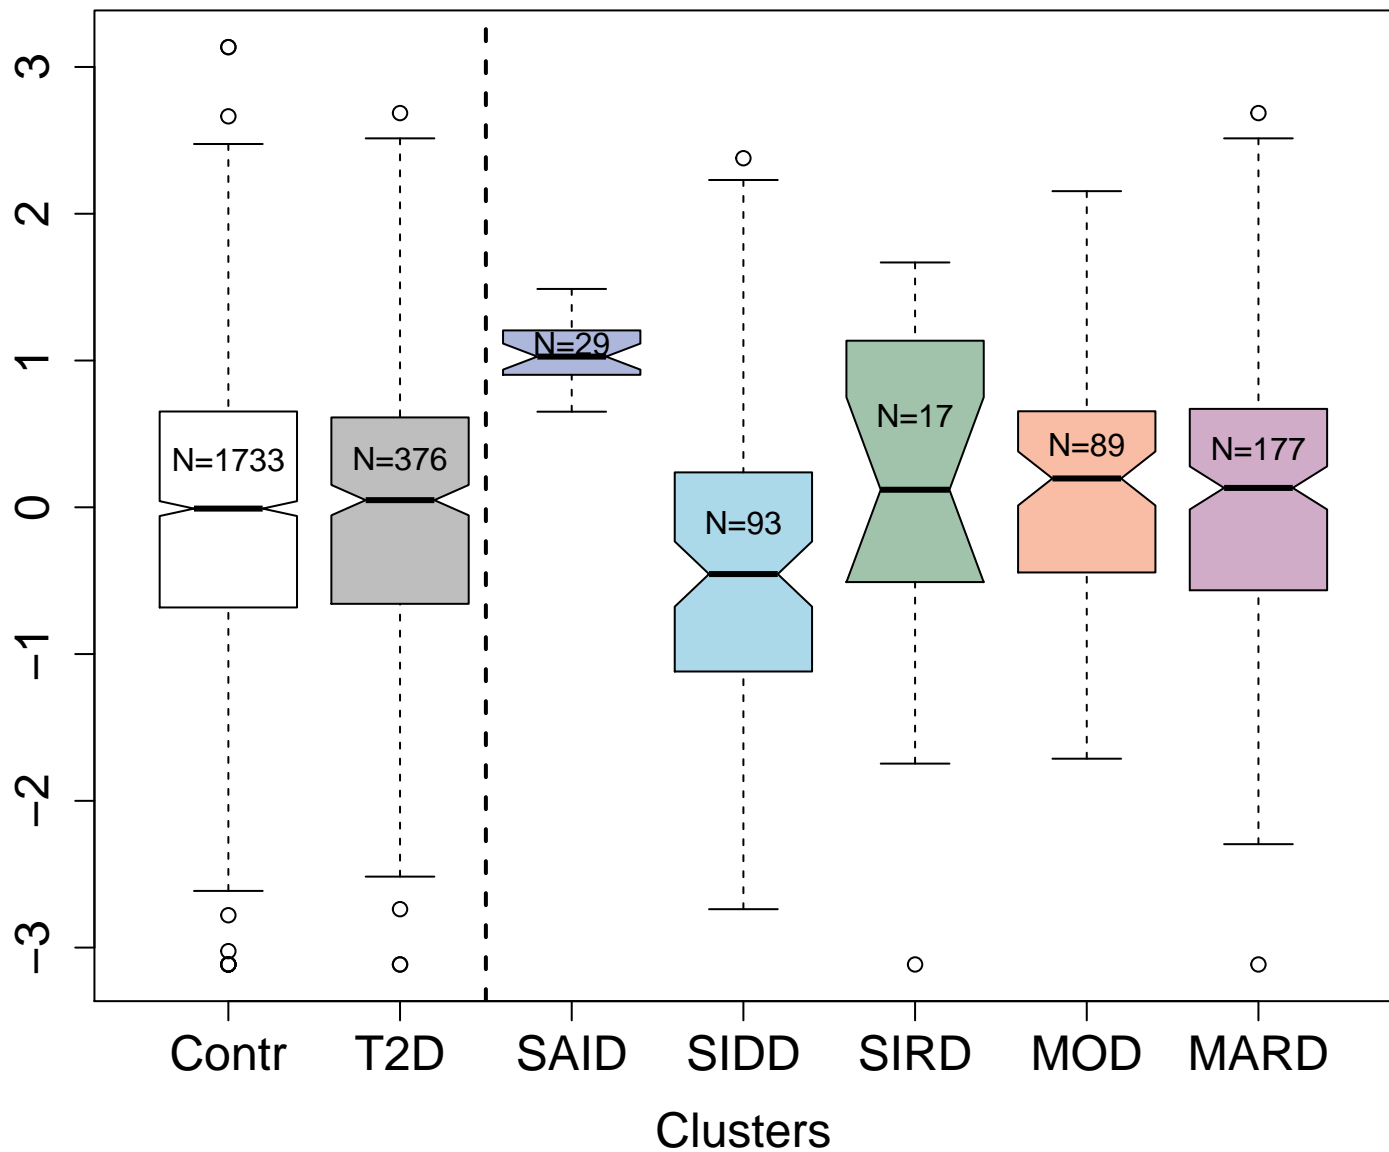



M36754 : octadecanedioate (C18-DC)

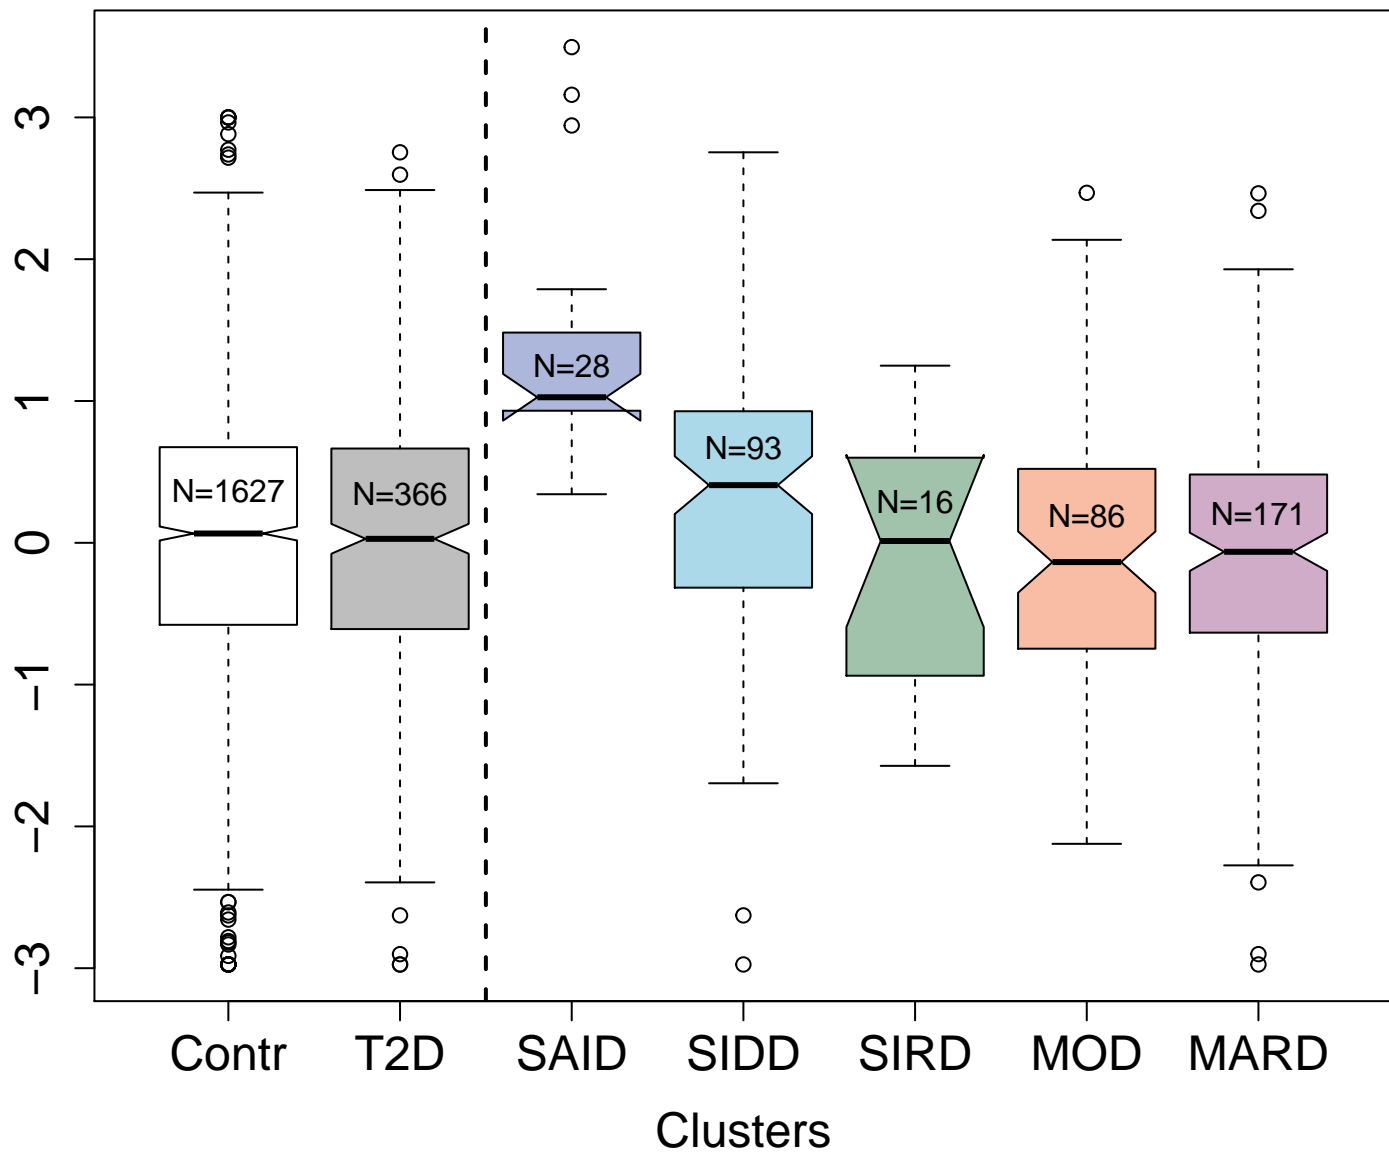

M64131 : ethyl beta-glucopyranoside

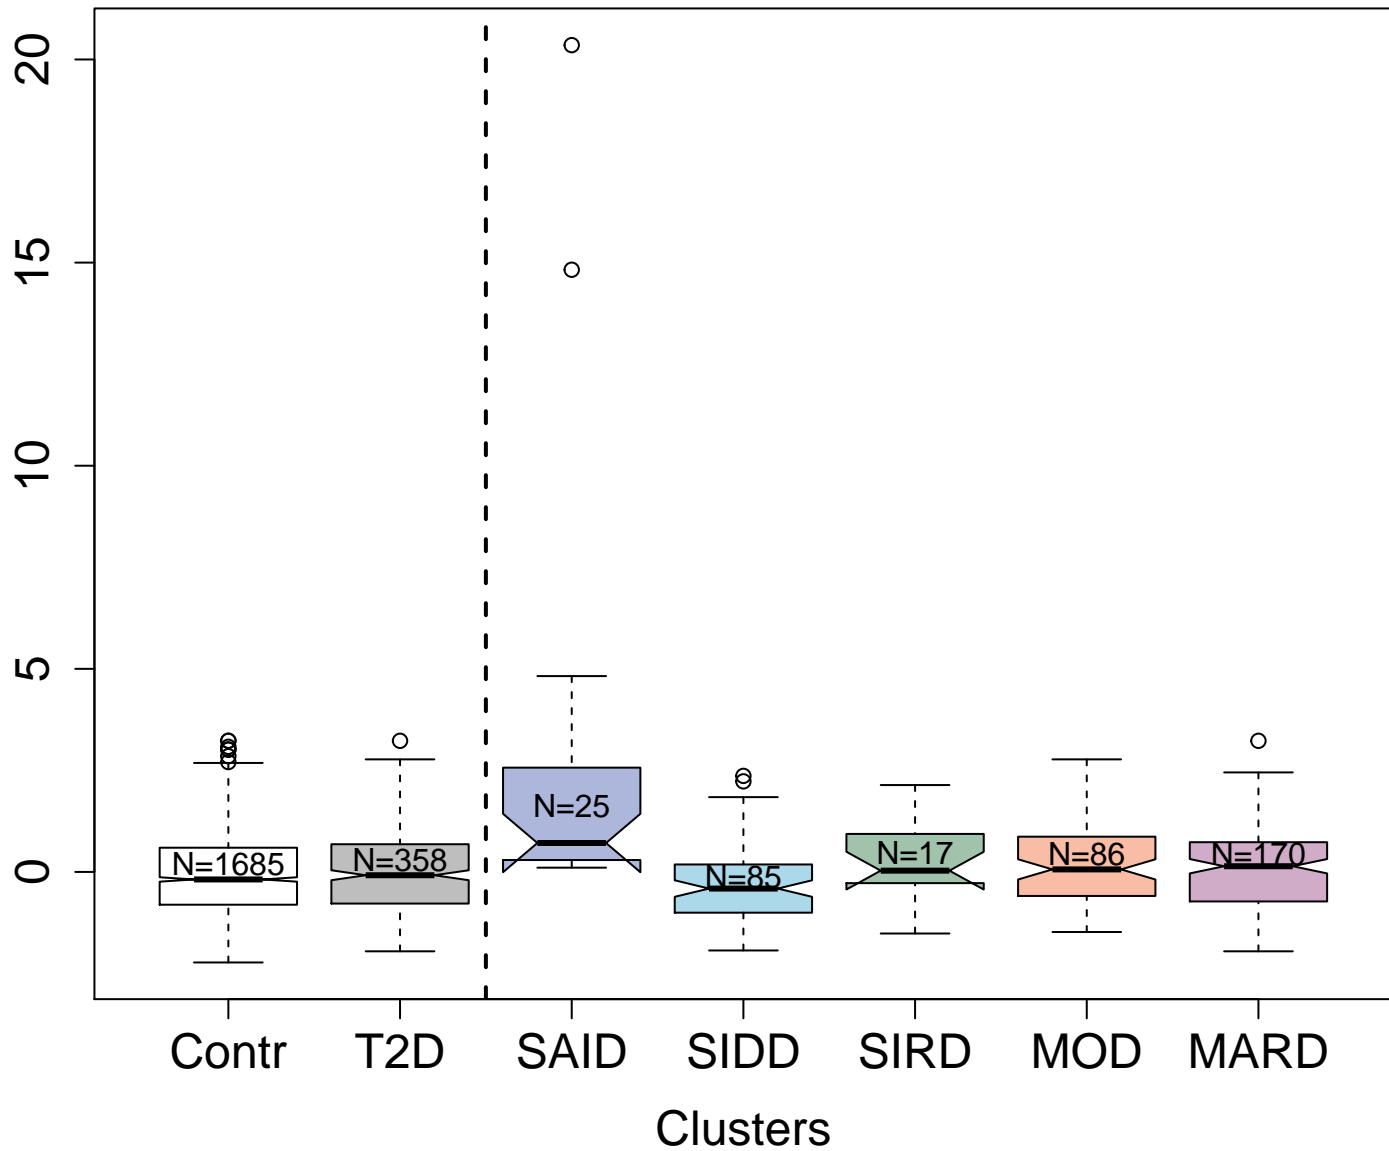

M15586 : maltose

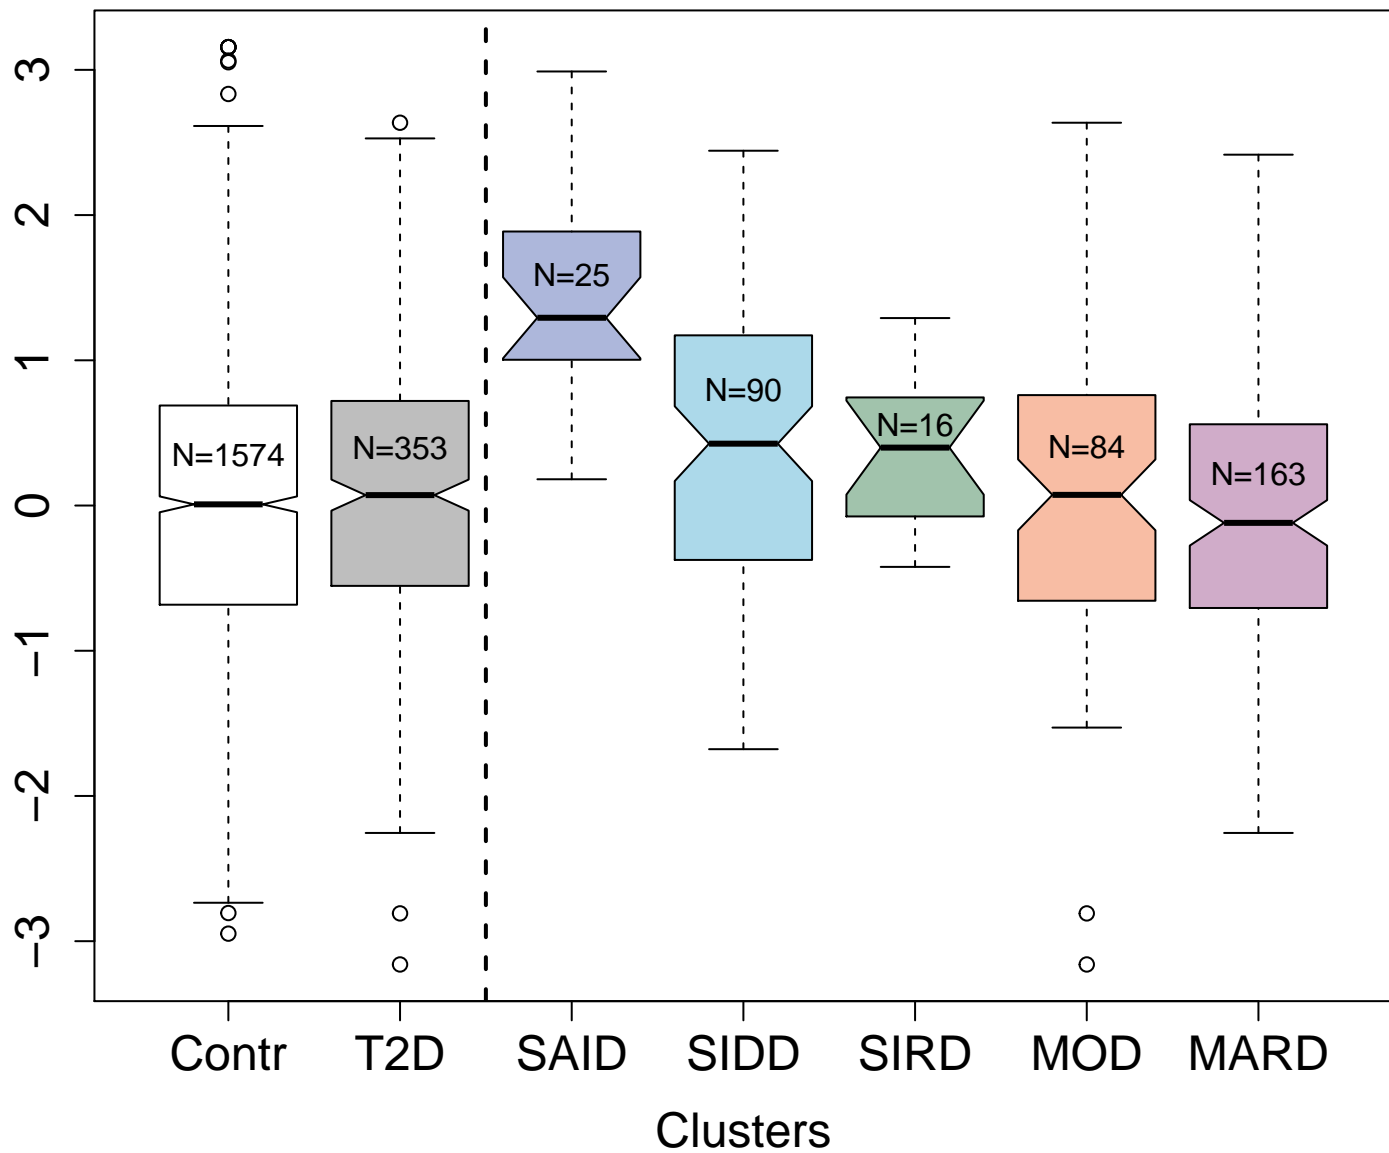

M57481 : sphingomyelin (d18:1/20:2, d18:2/20:1, d16:1/22:2)

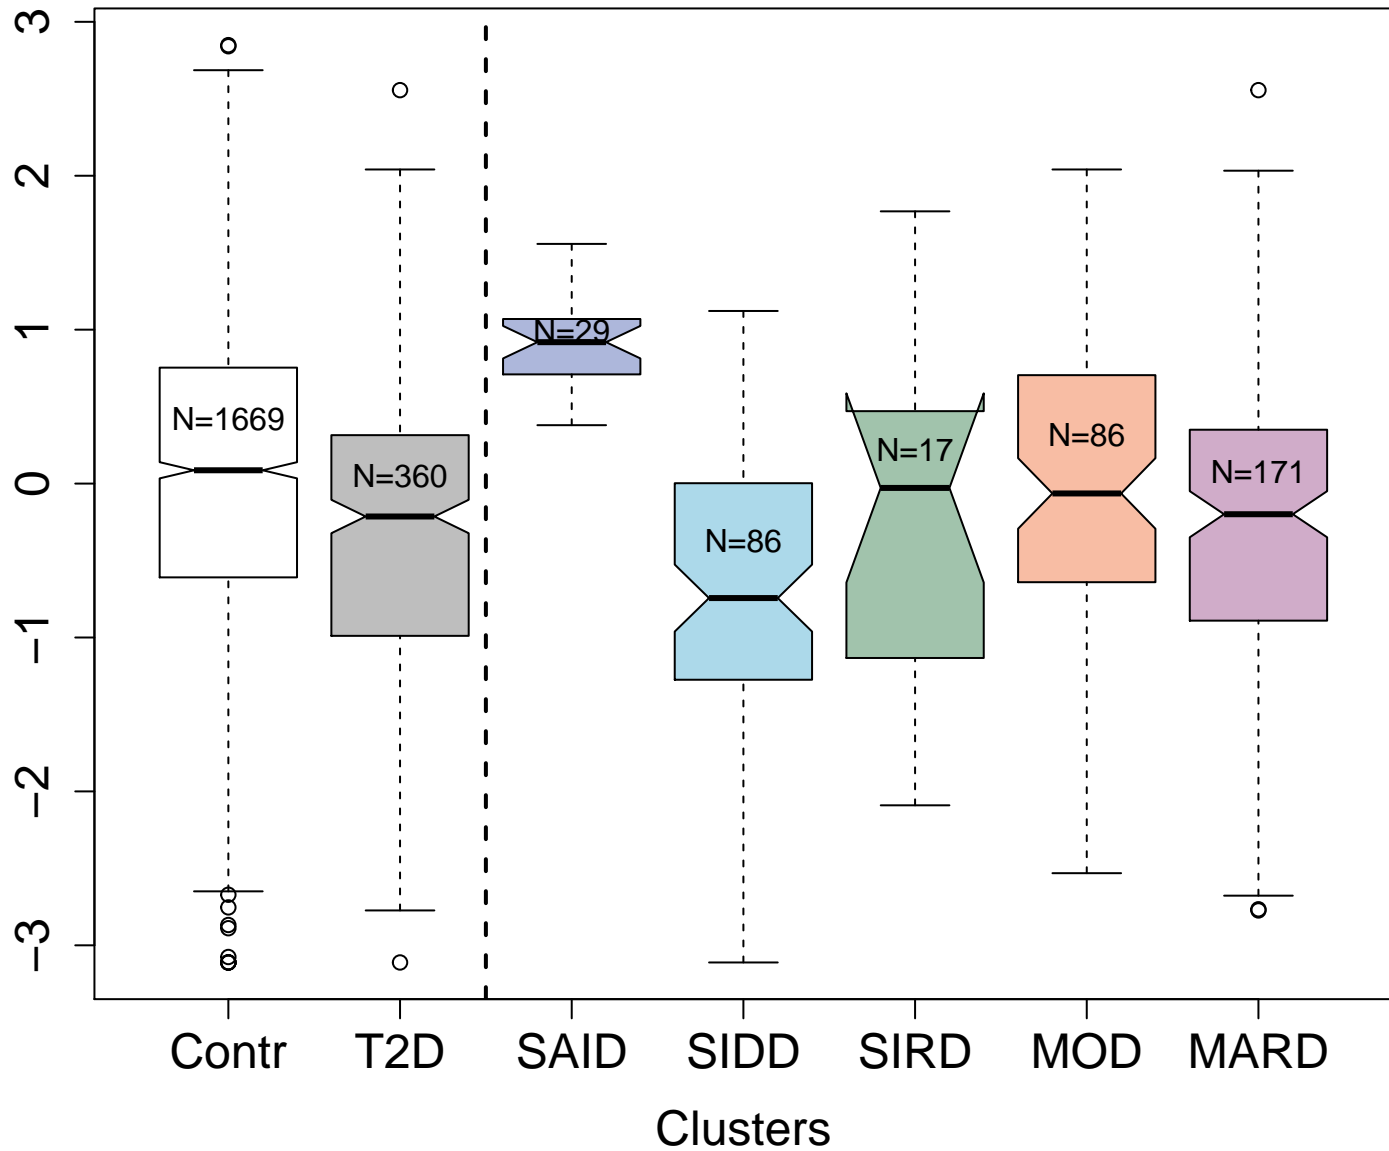

M34409 : stearoylcarnitine (C18)

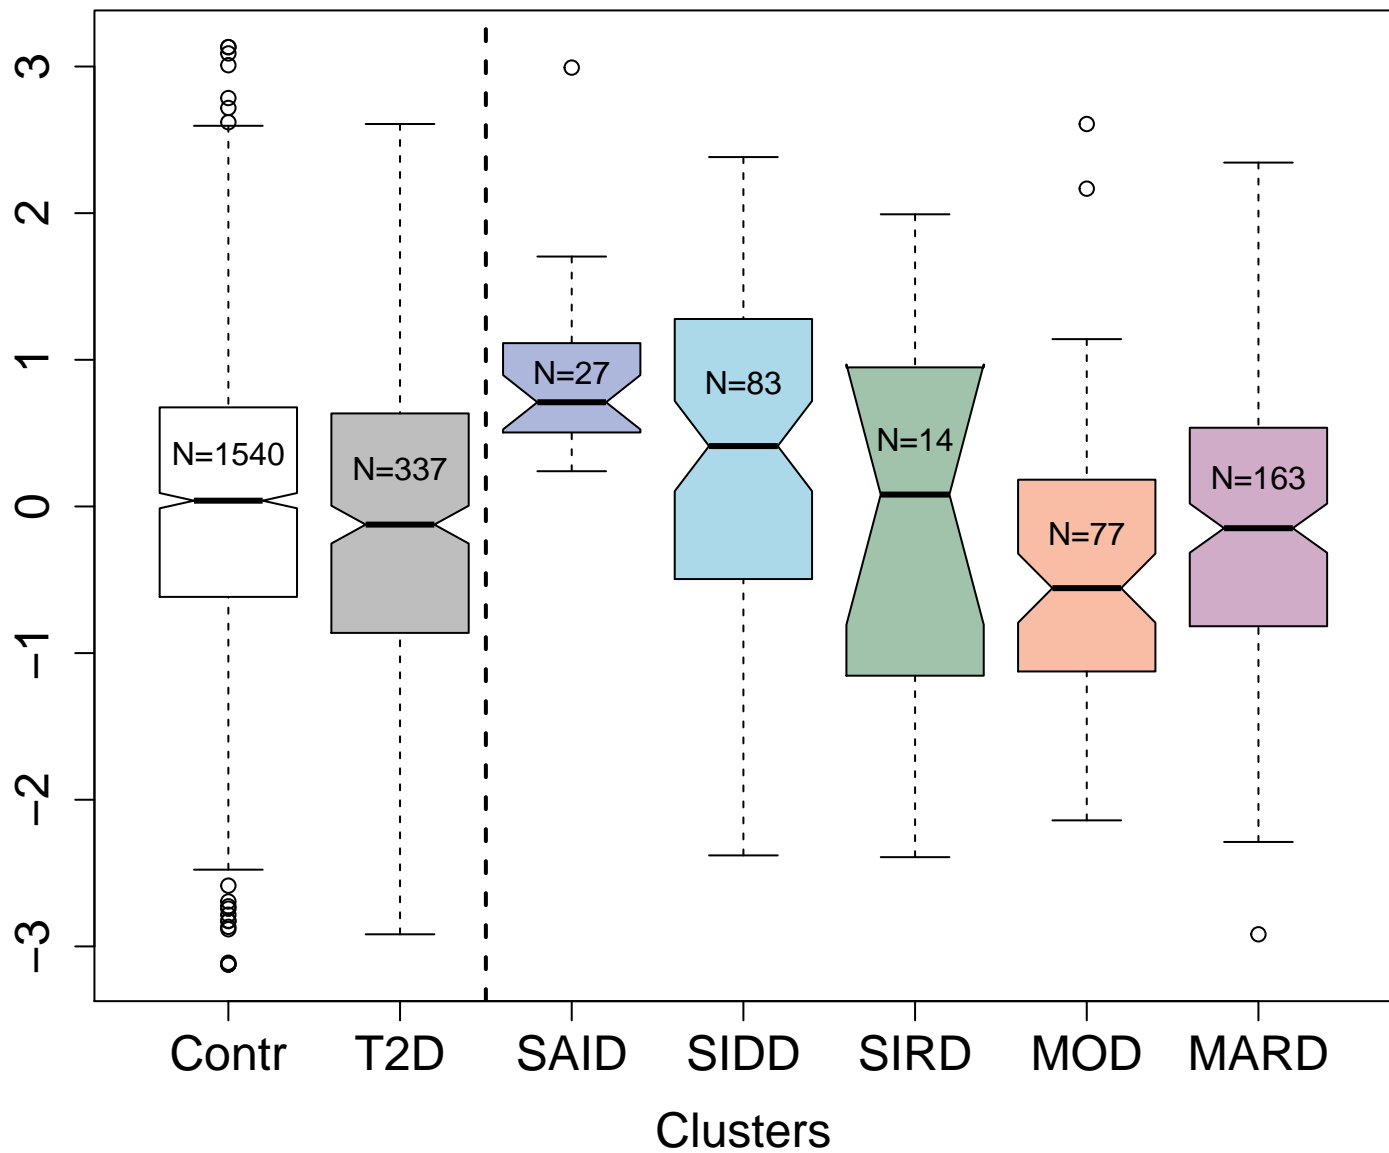

M49637 : X - 23739

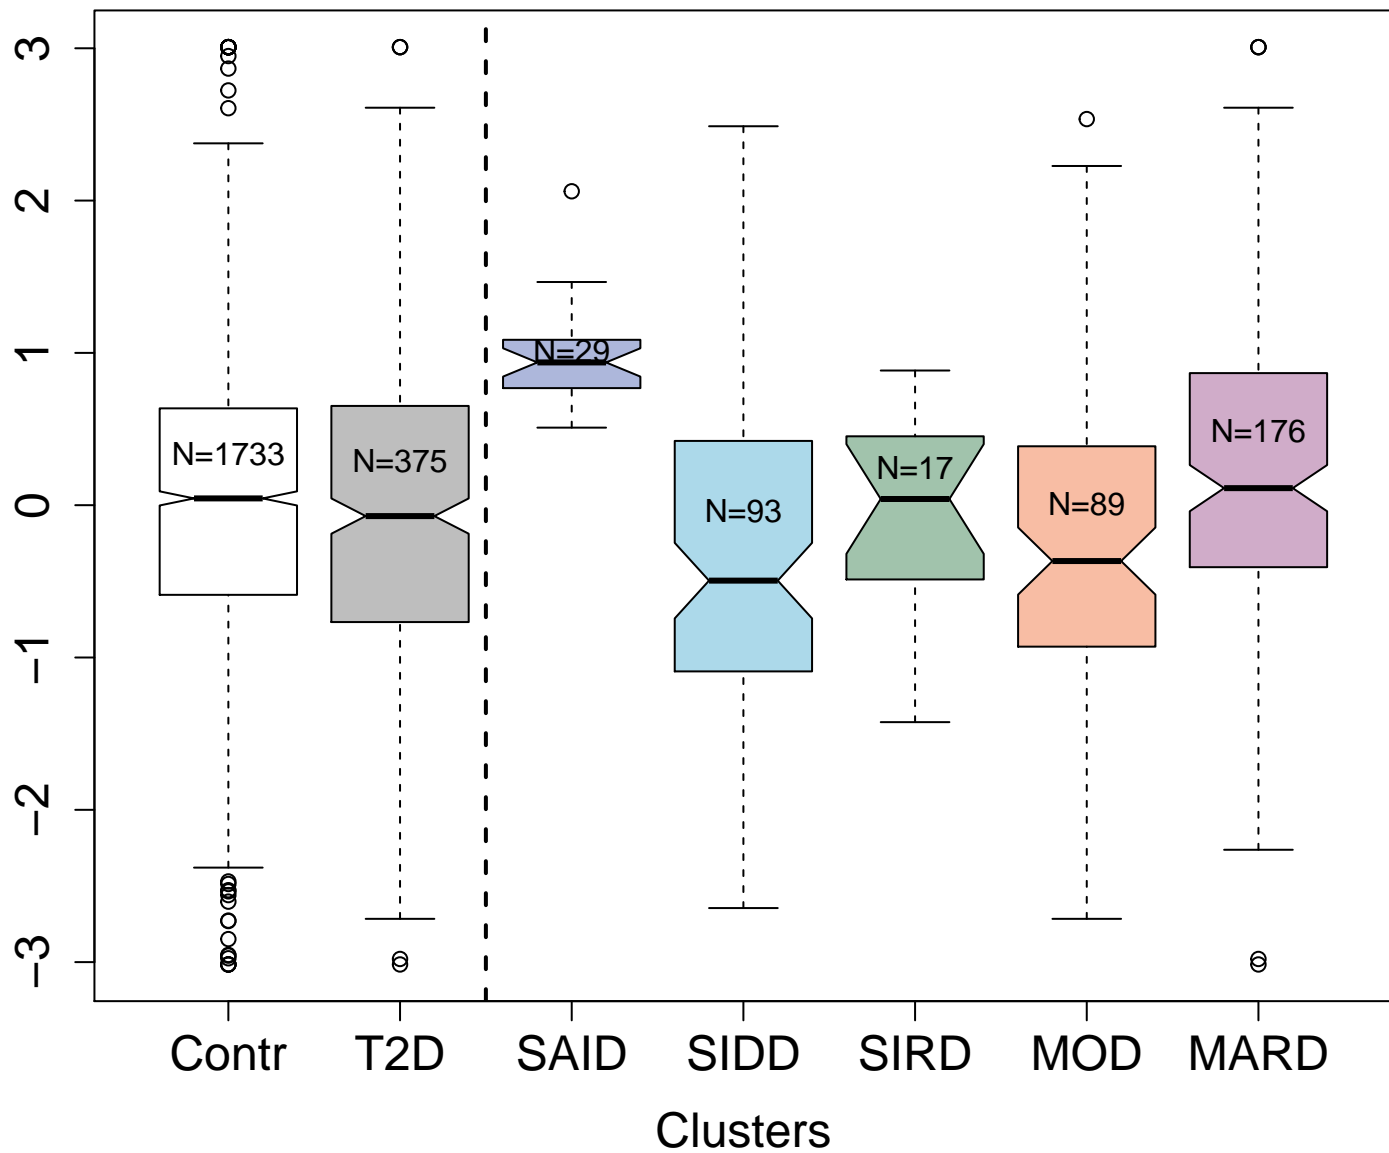

M513 : creatinine

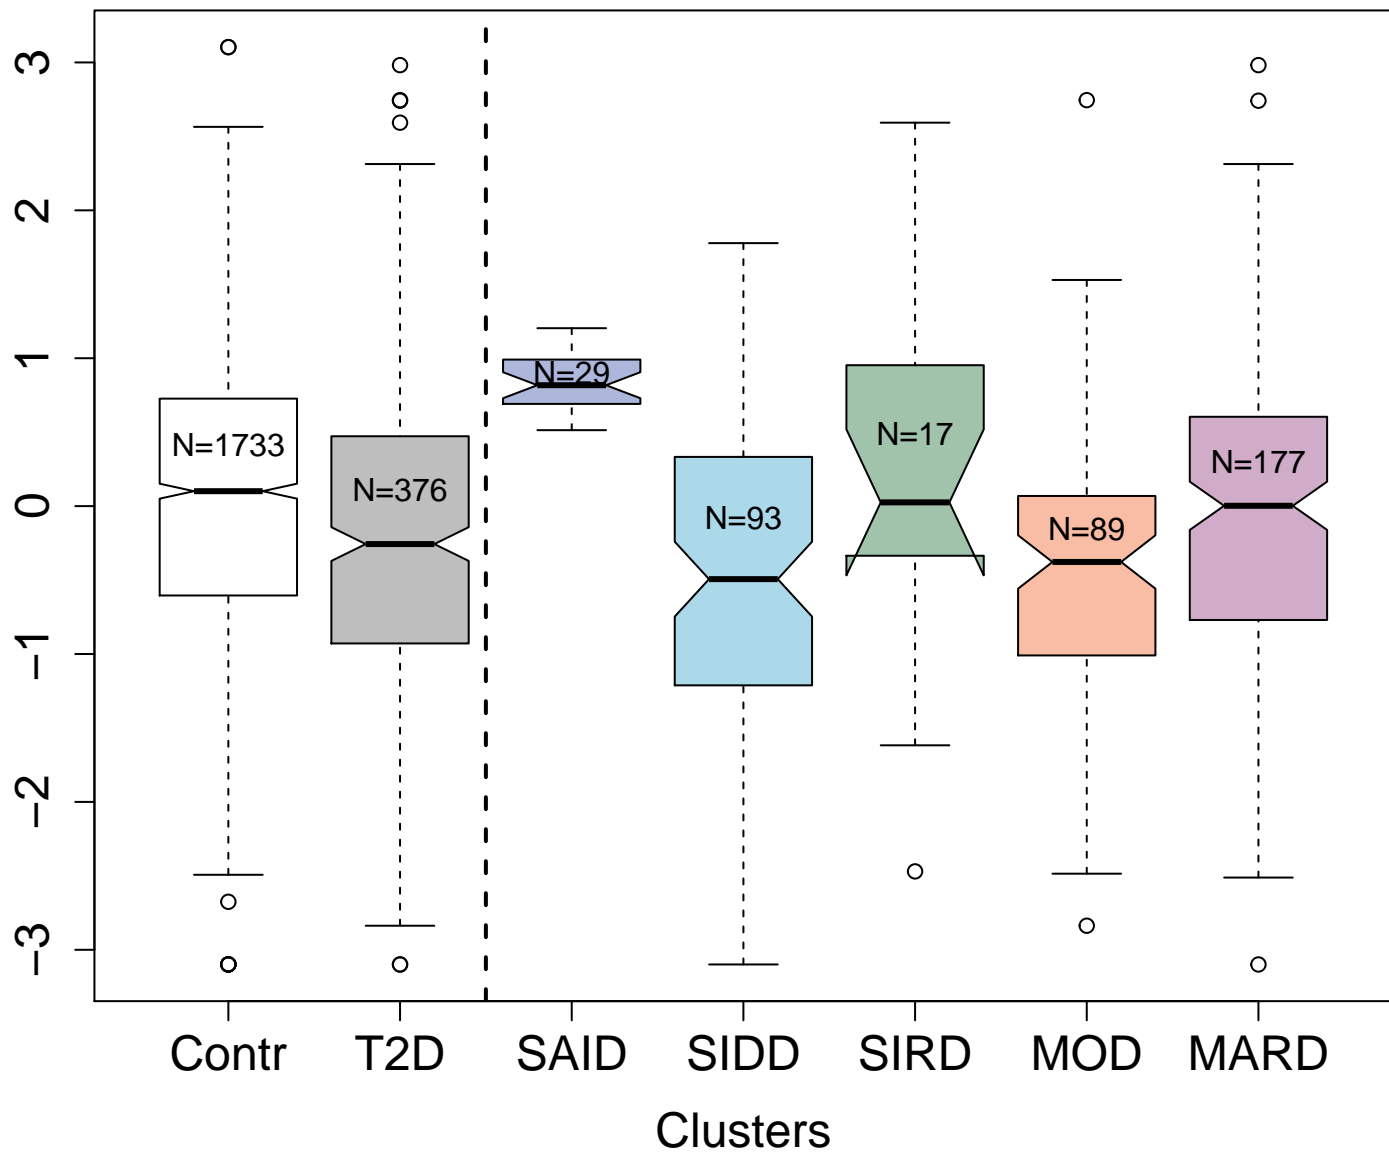

M1899 : quinolate

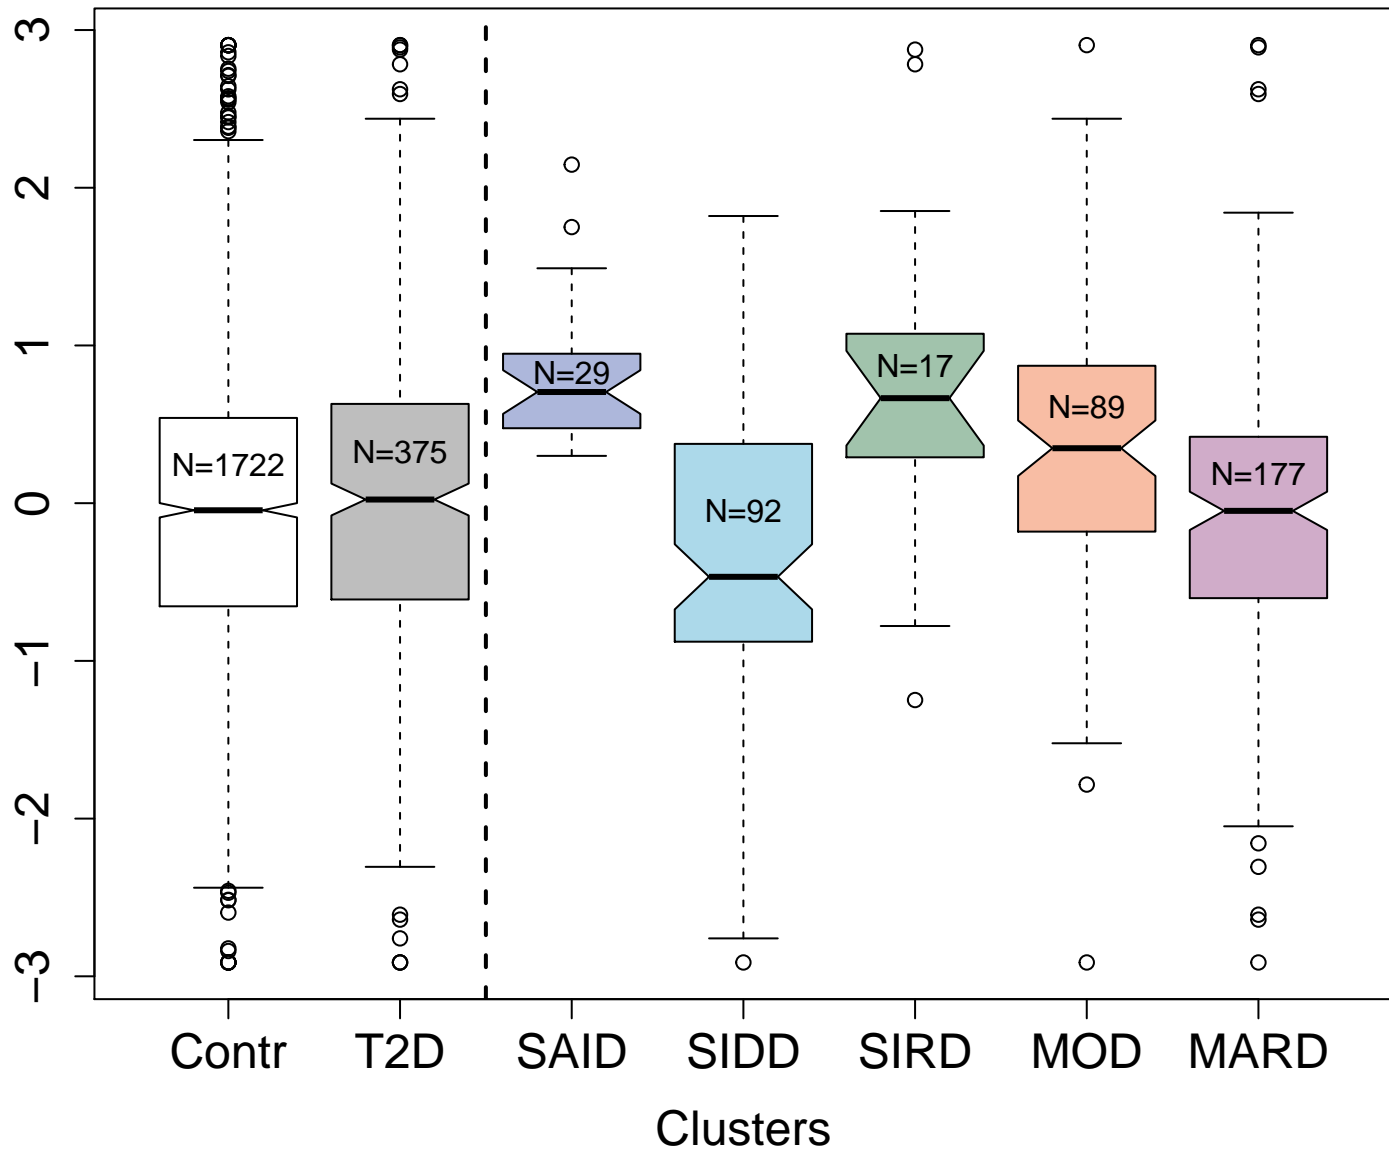



M52437 : sphingomyelin (d18:2/24:1, d18:1/24:2)\*

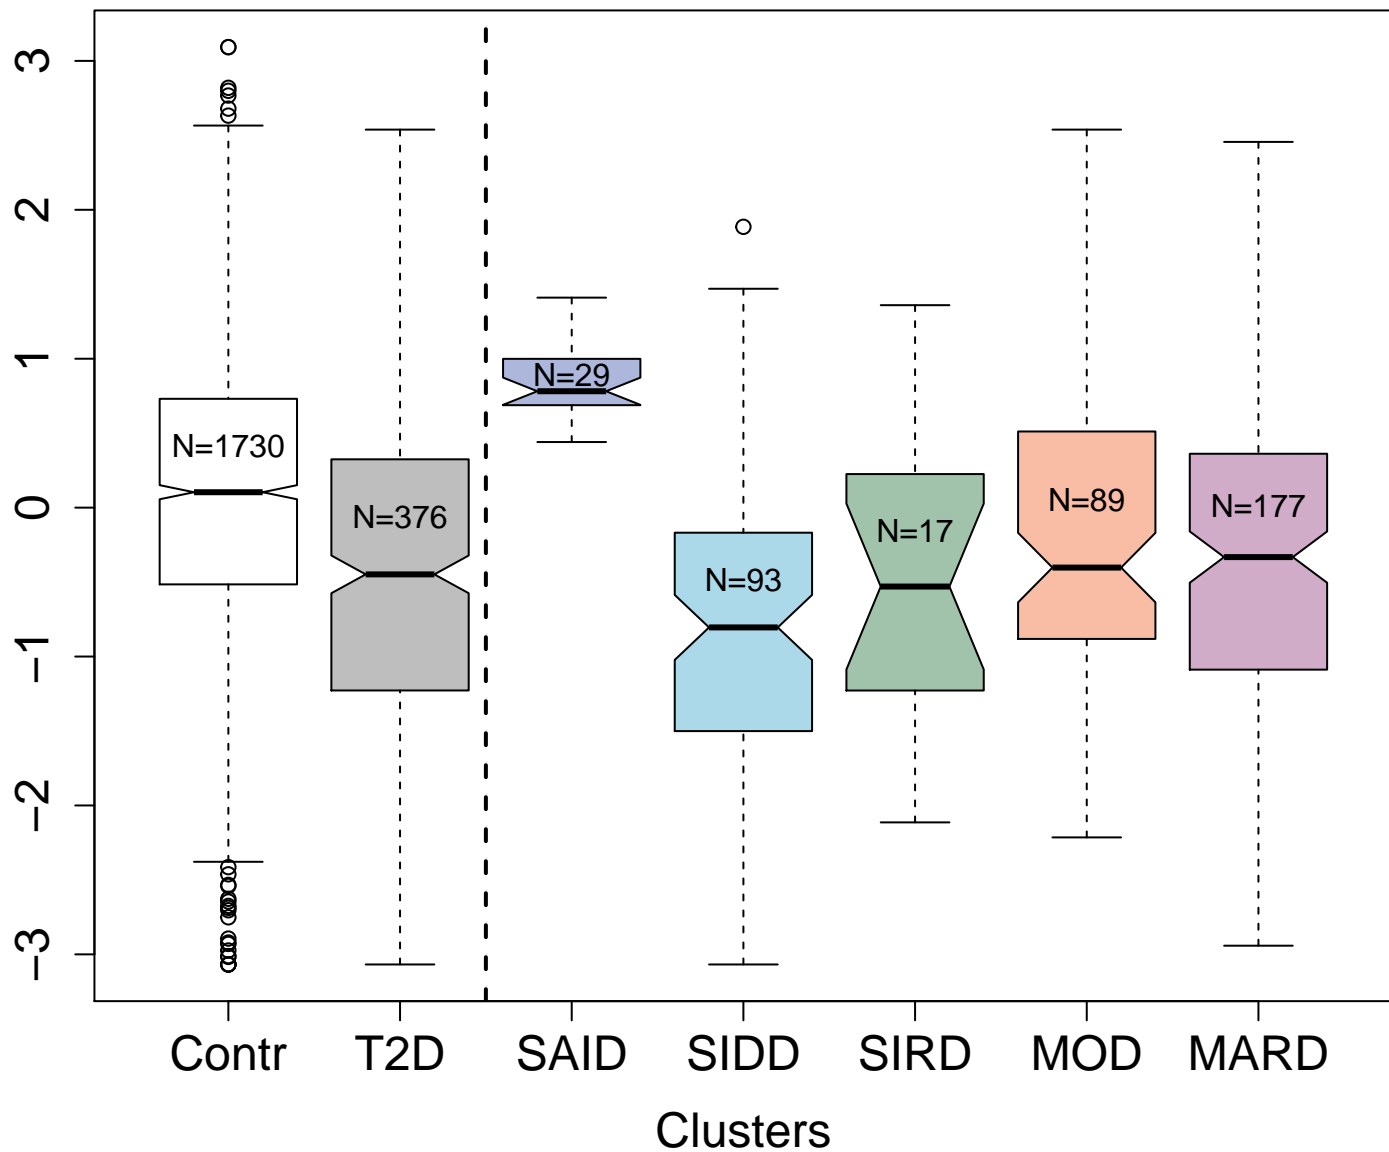

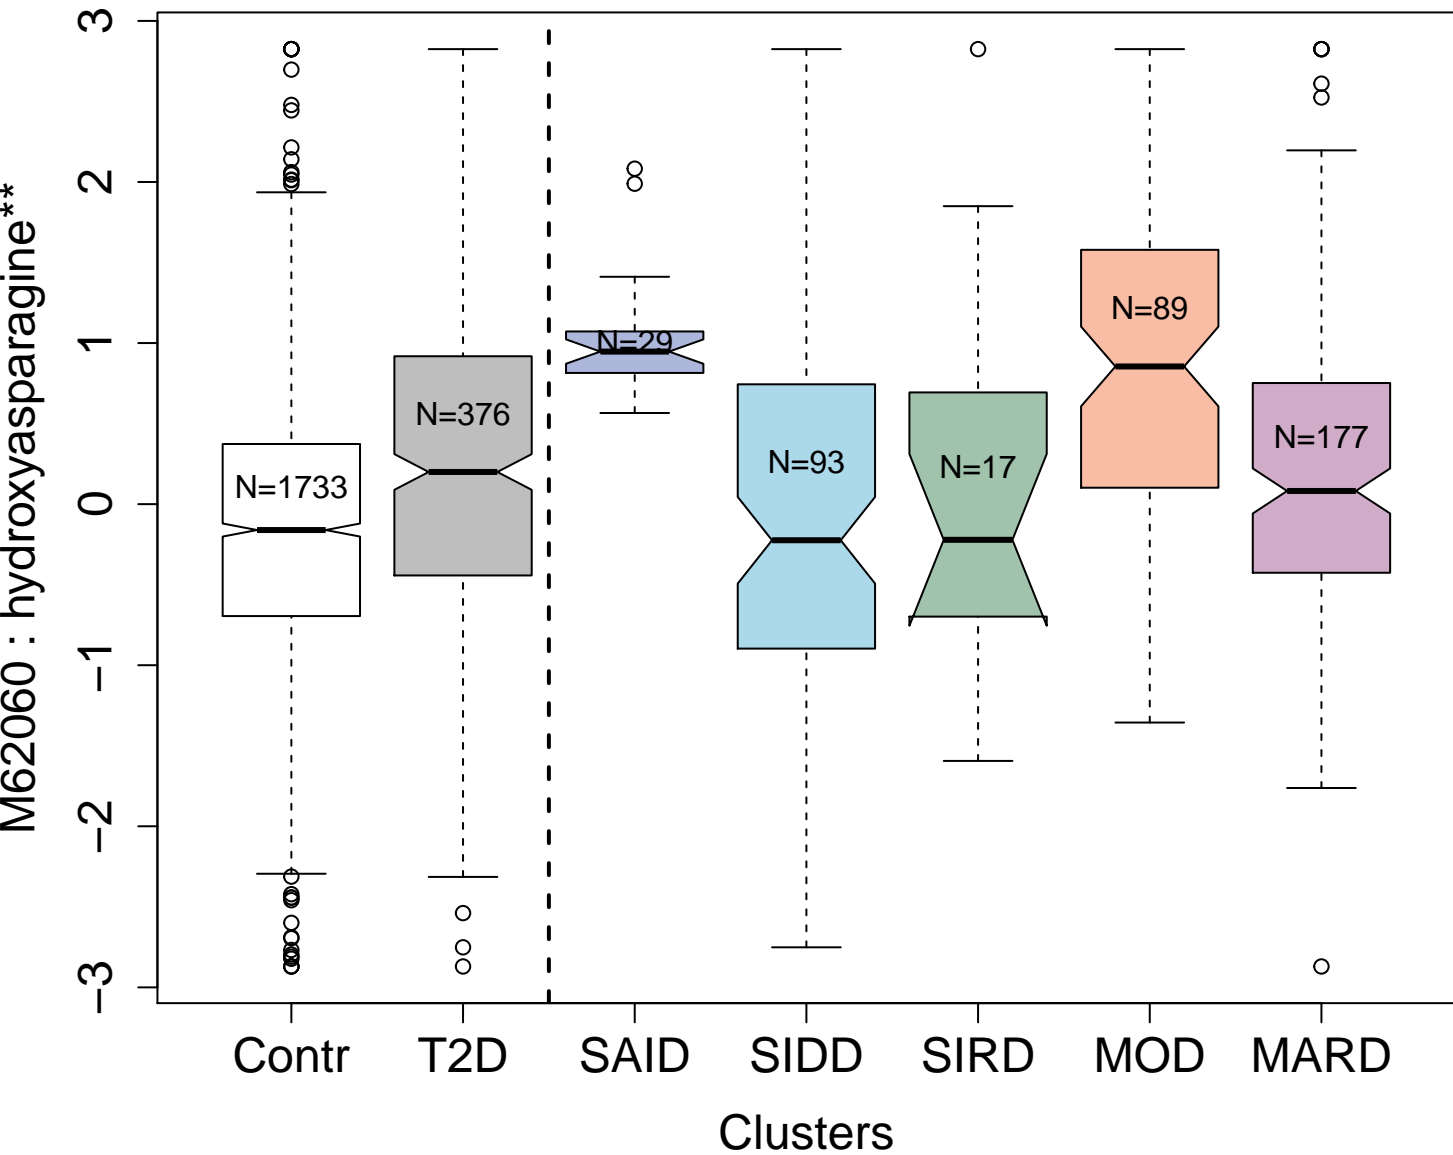

M46590 : X - 07765

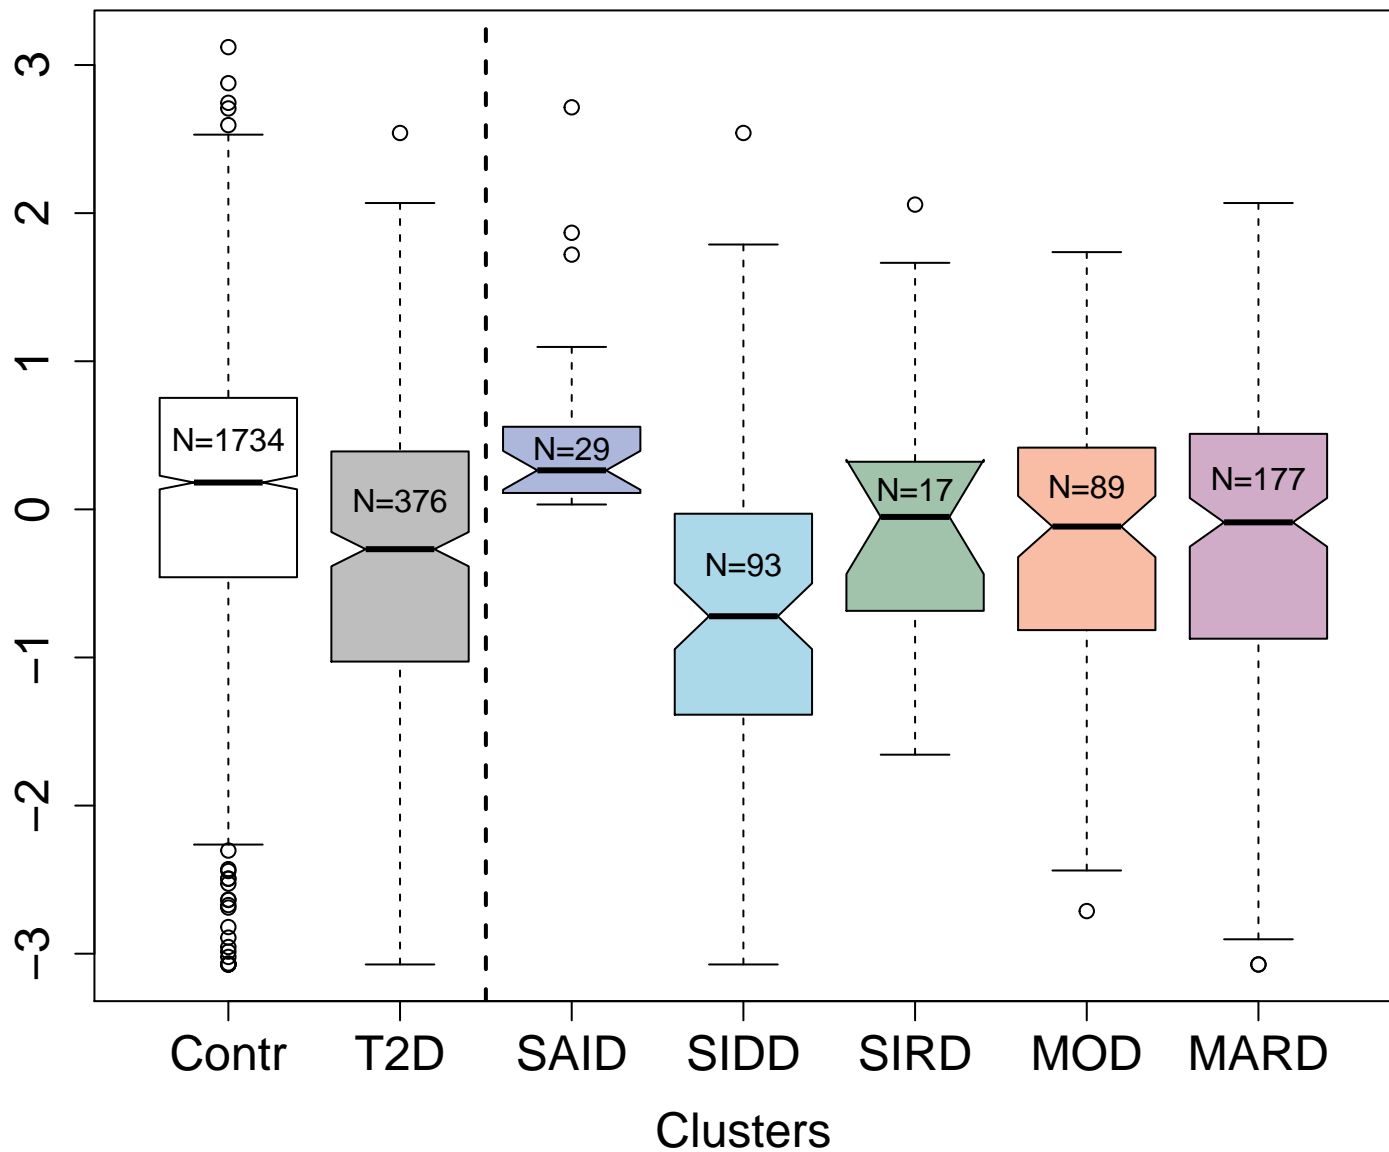

M57699 : cortolone glucuronide (1)

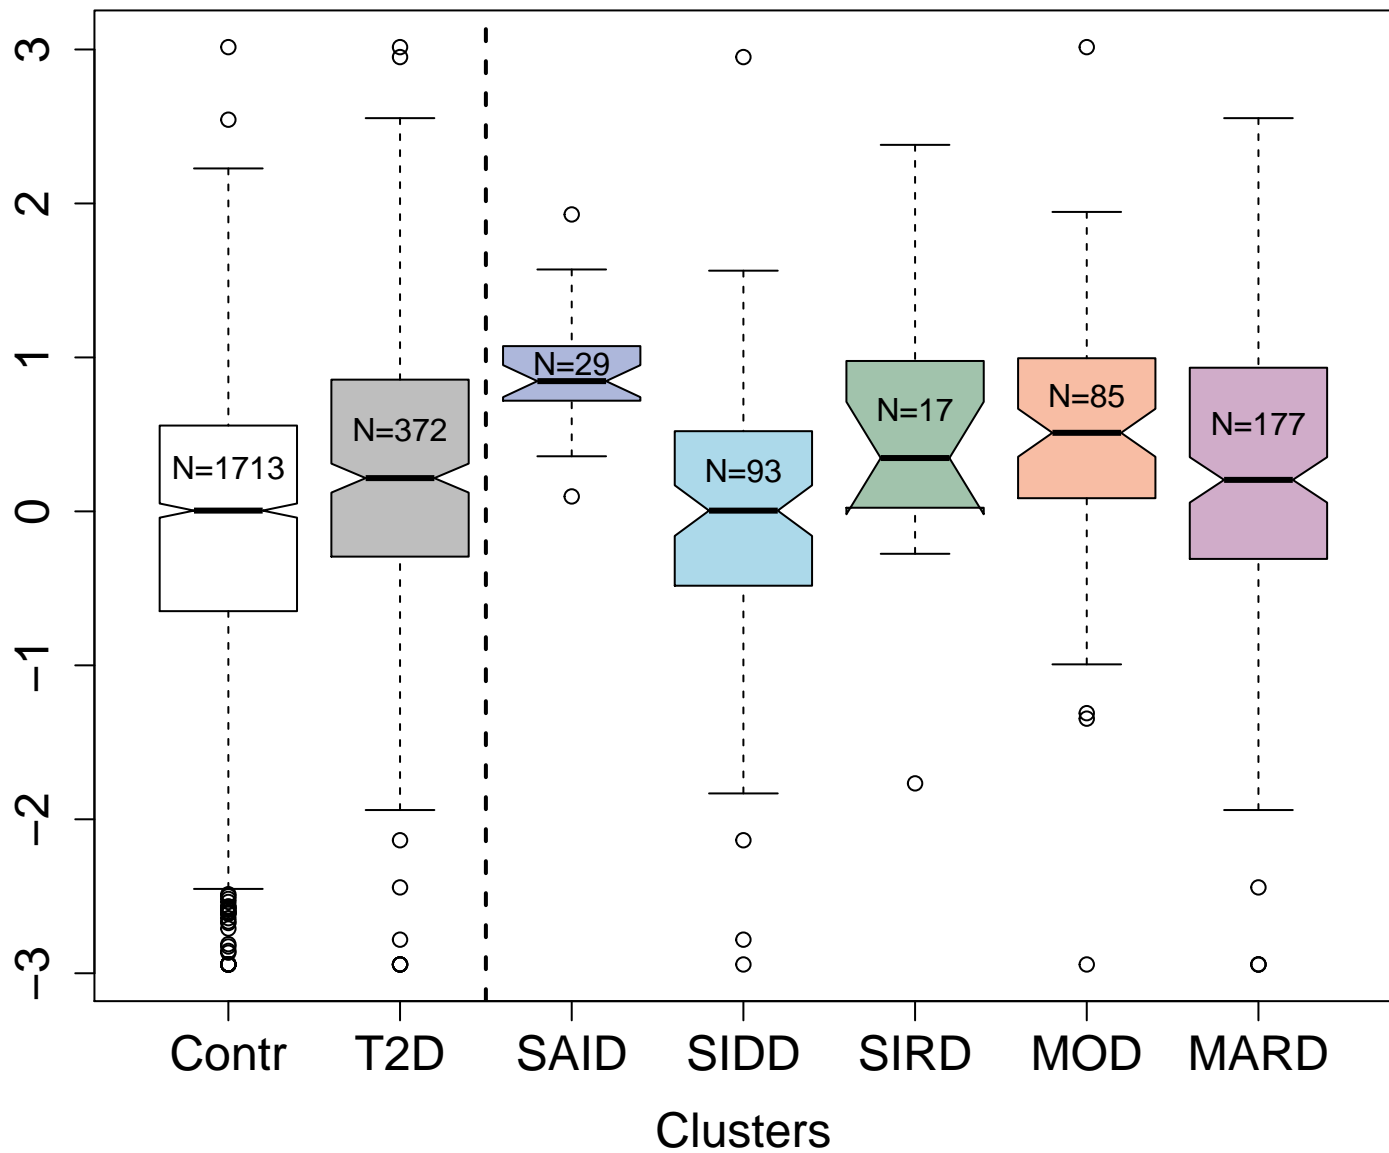

M45413 : O-sulfo-L-tyrosine

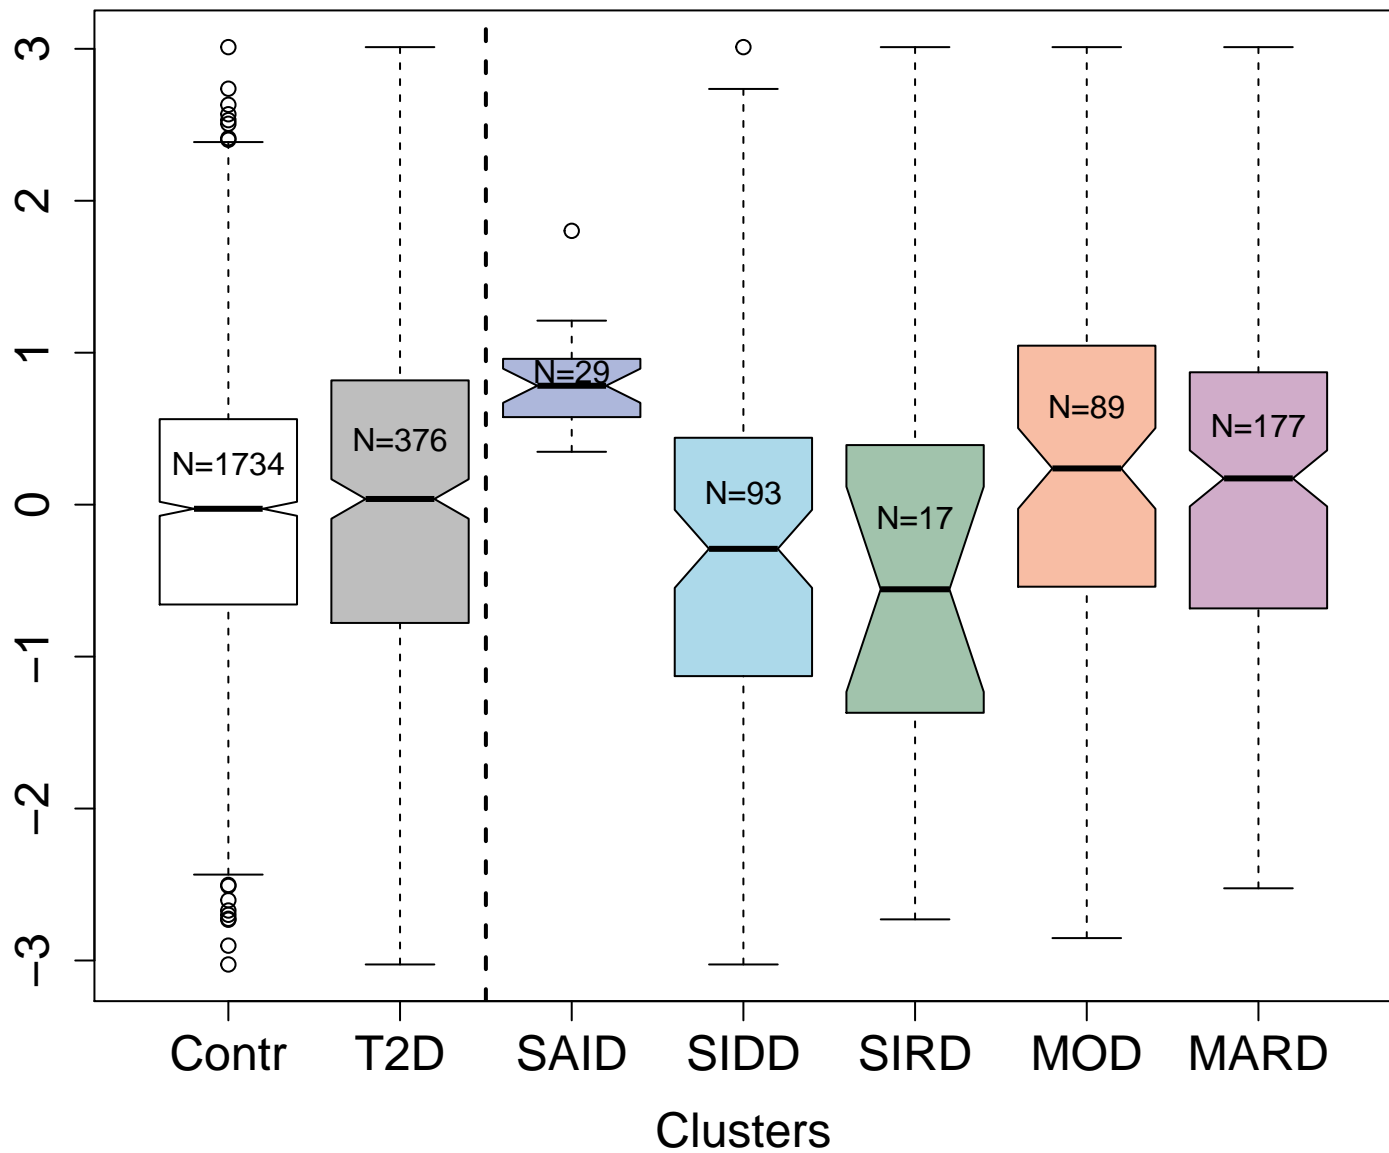

M1107 : allantoin

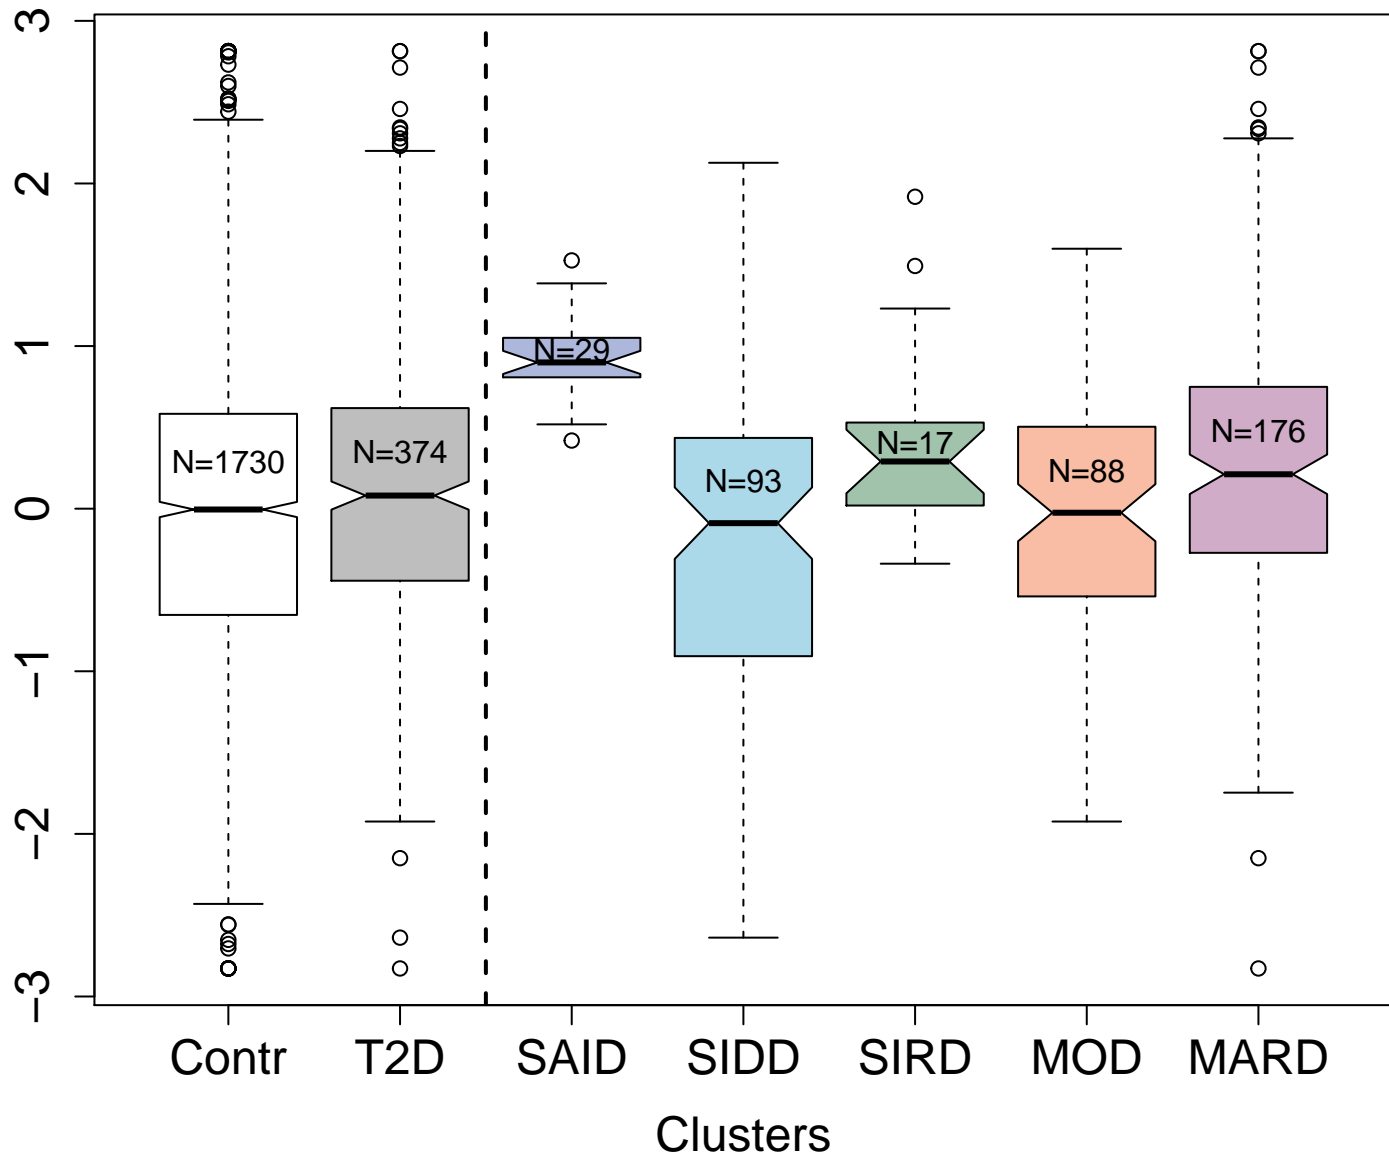

M527 : lactate

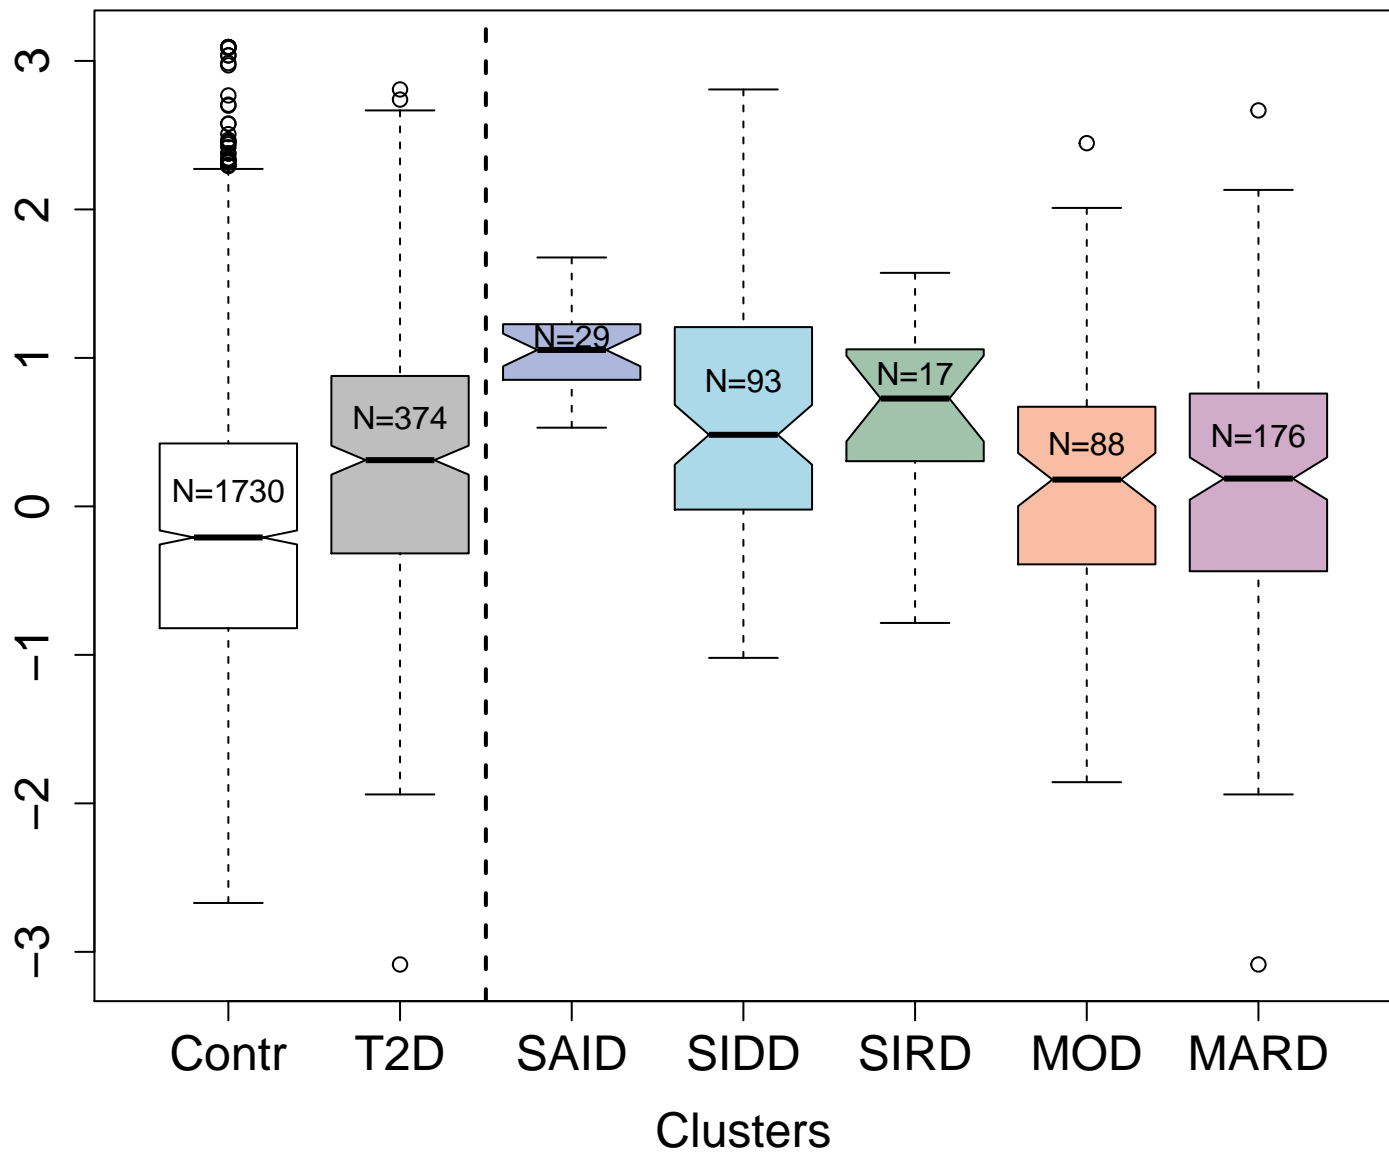

M485 : spermidine

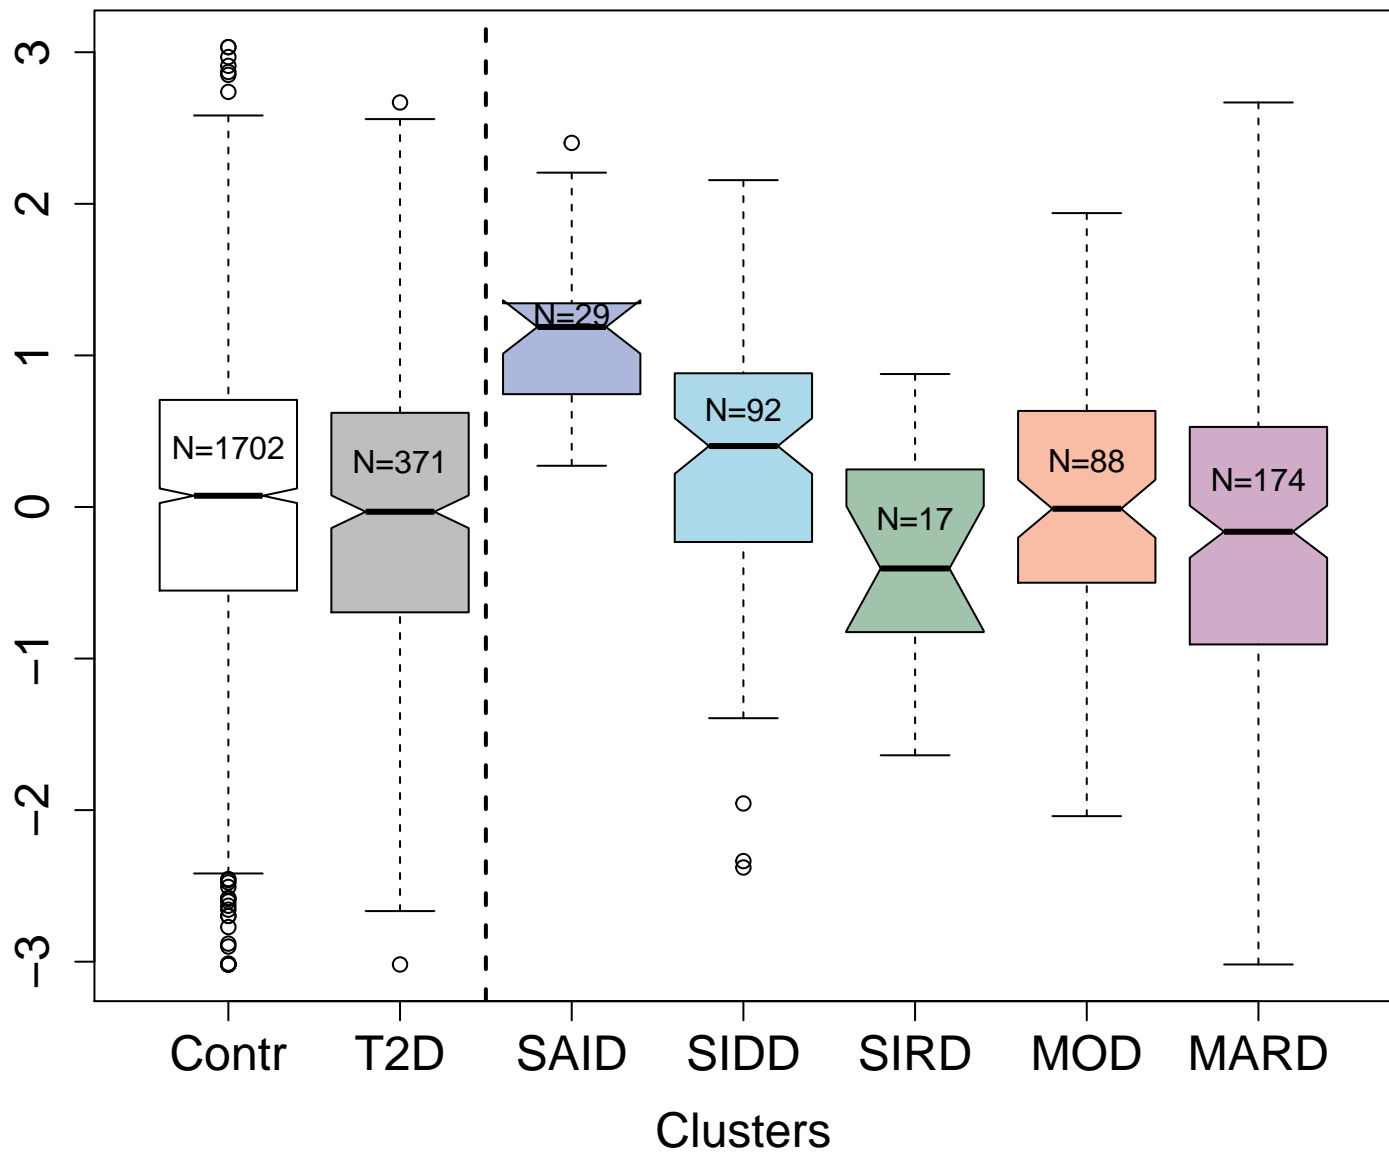



M64330 : Gliclazide

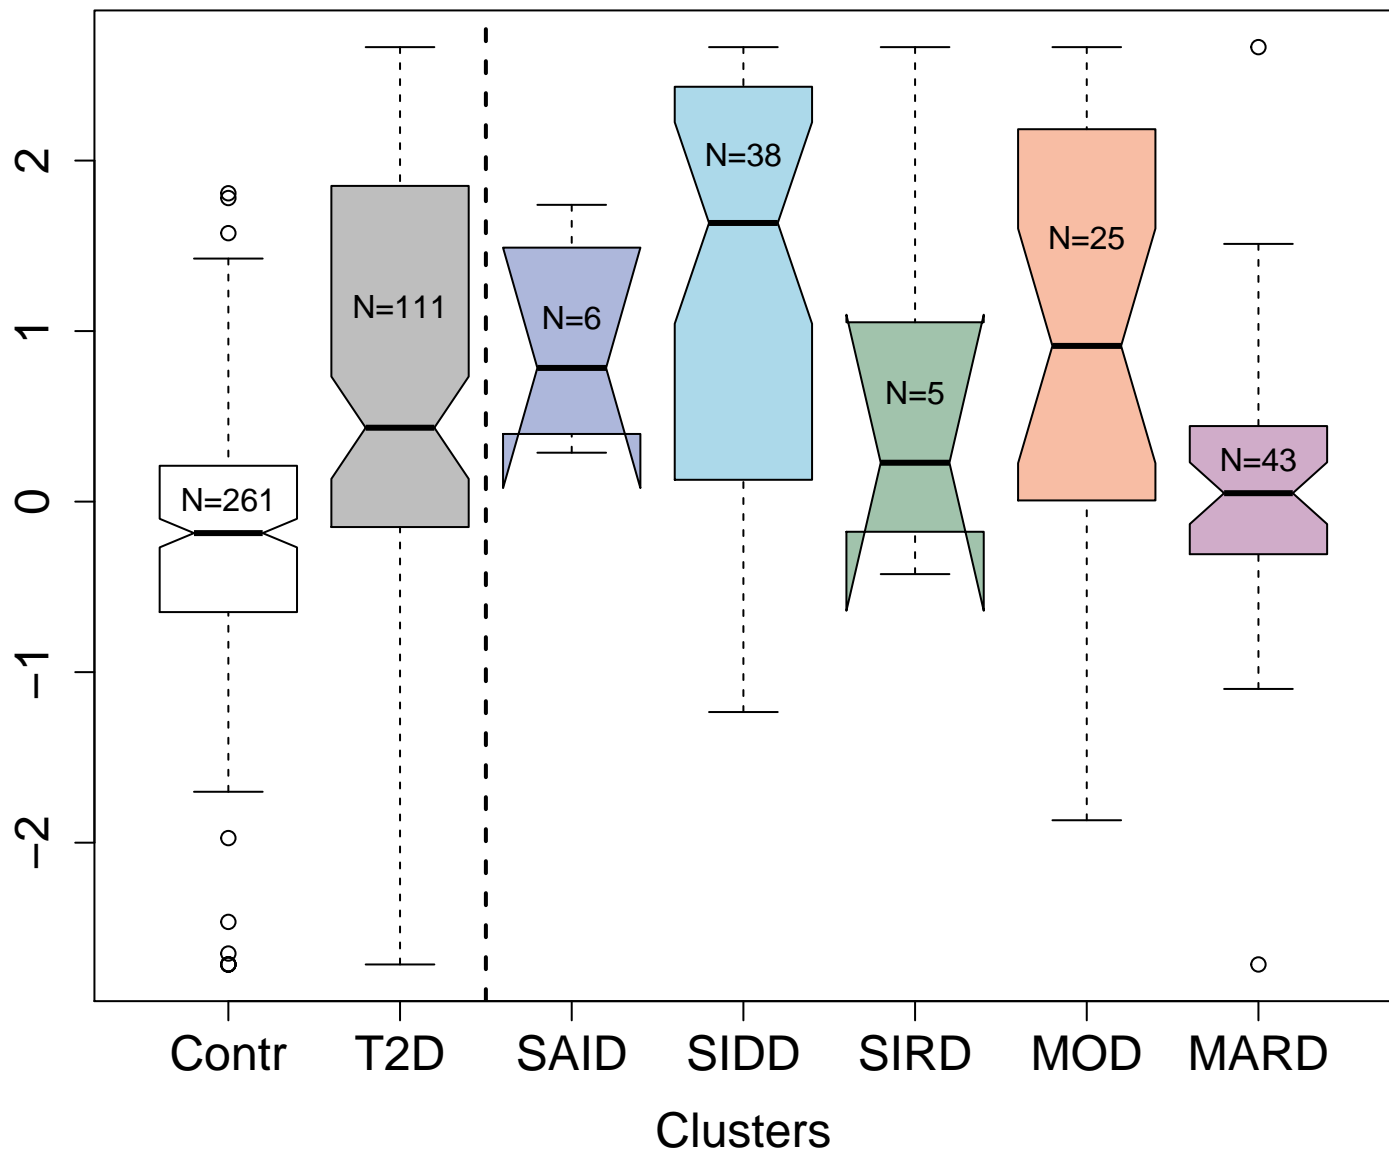

M62716 : X - 25419

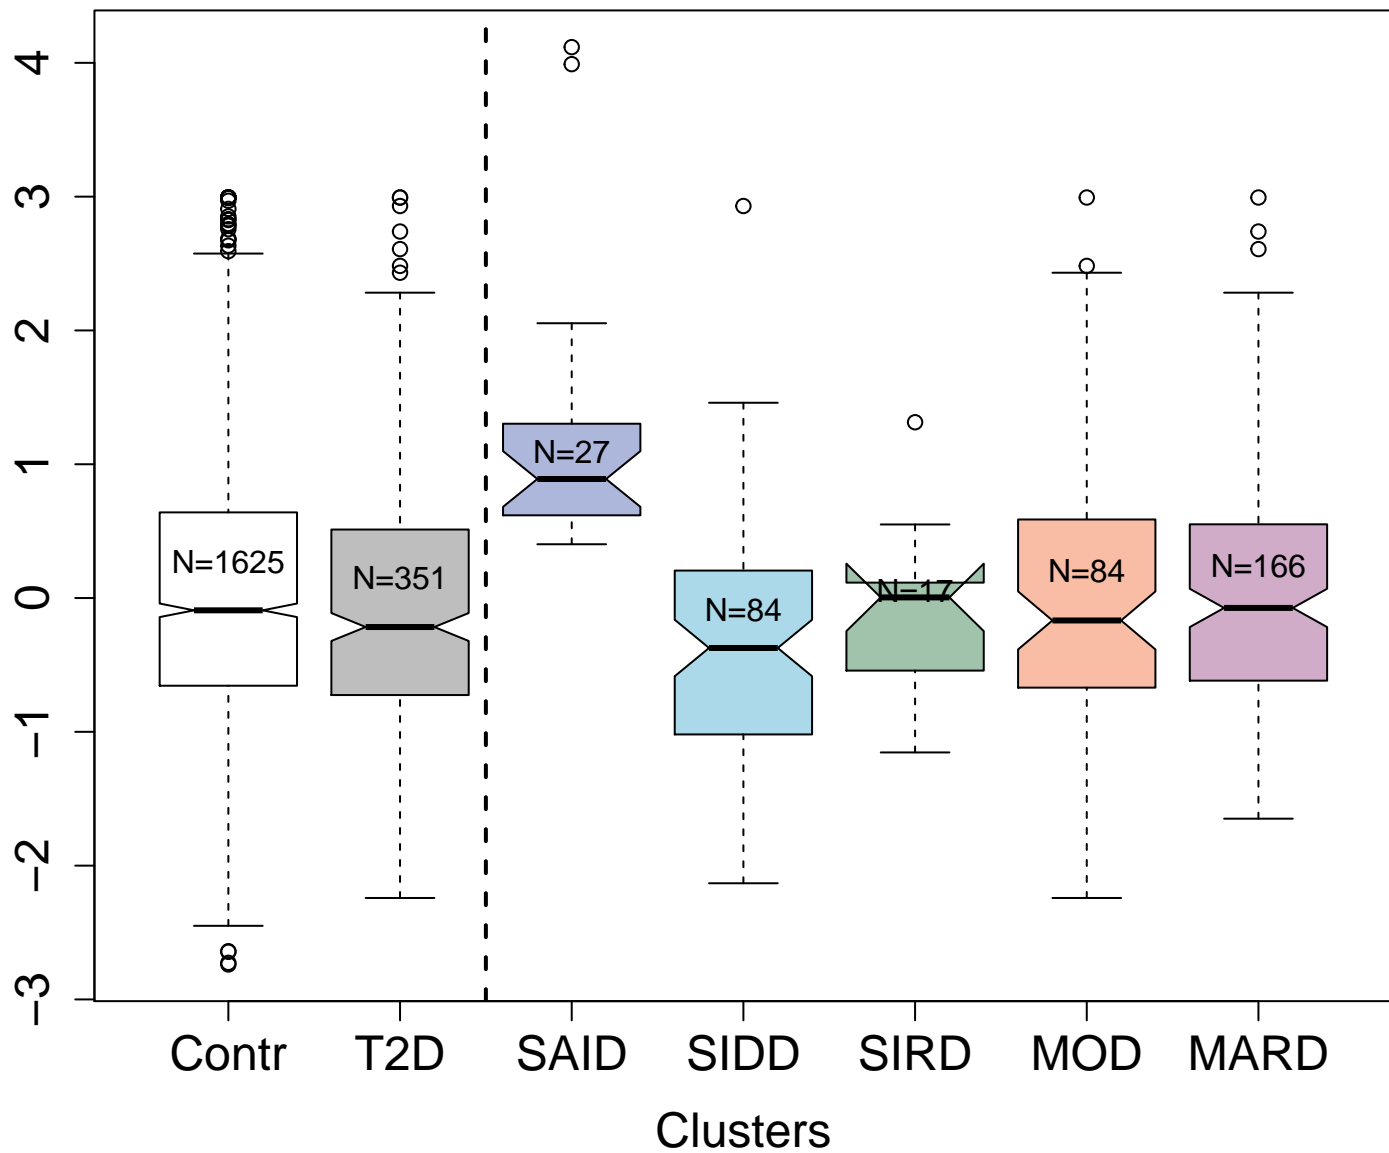

M59 : histidine

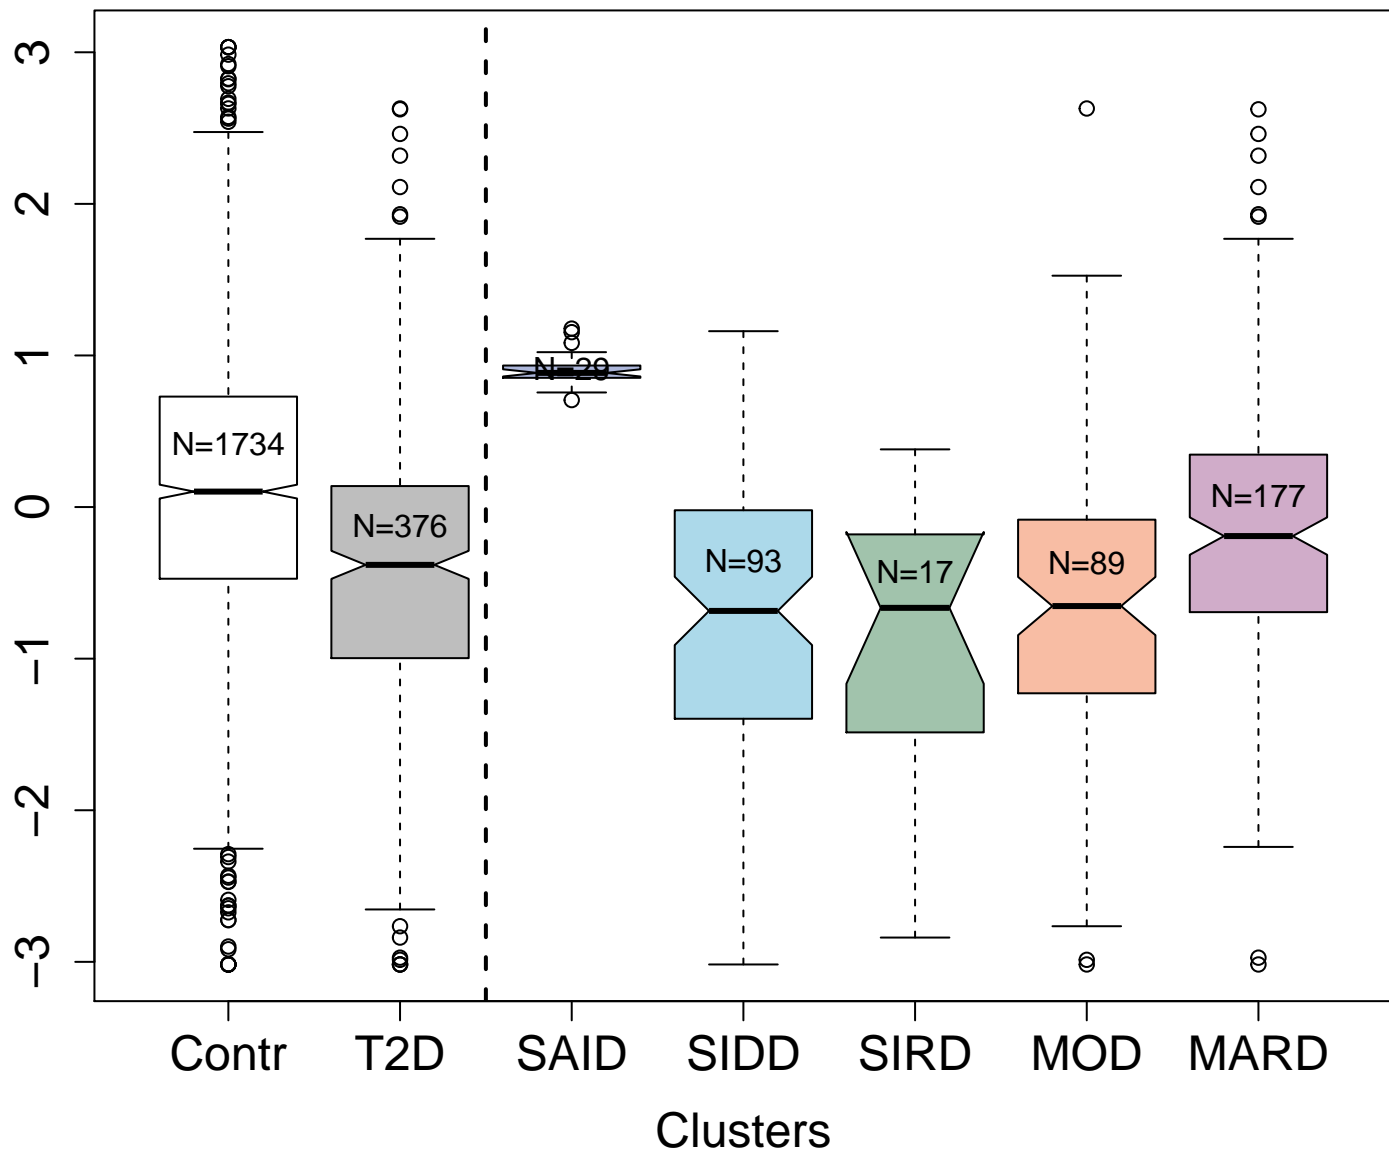

M37431 : N-methylproline

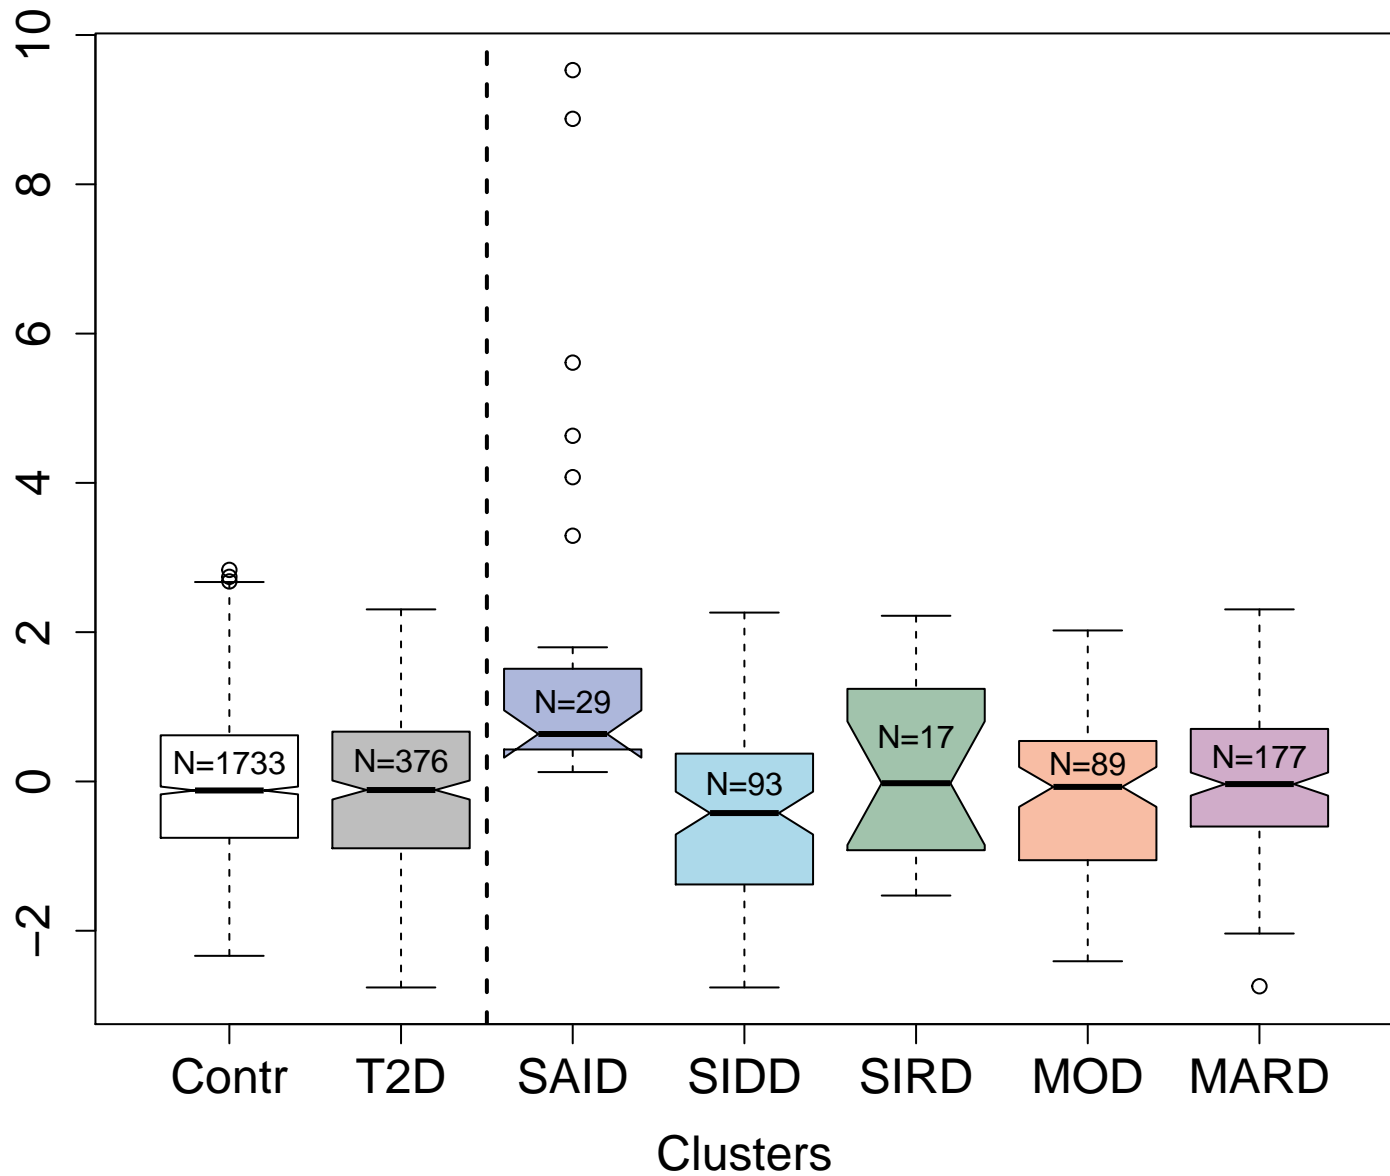

M1125 : isoleucine

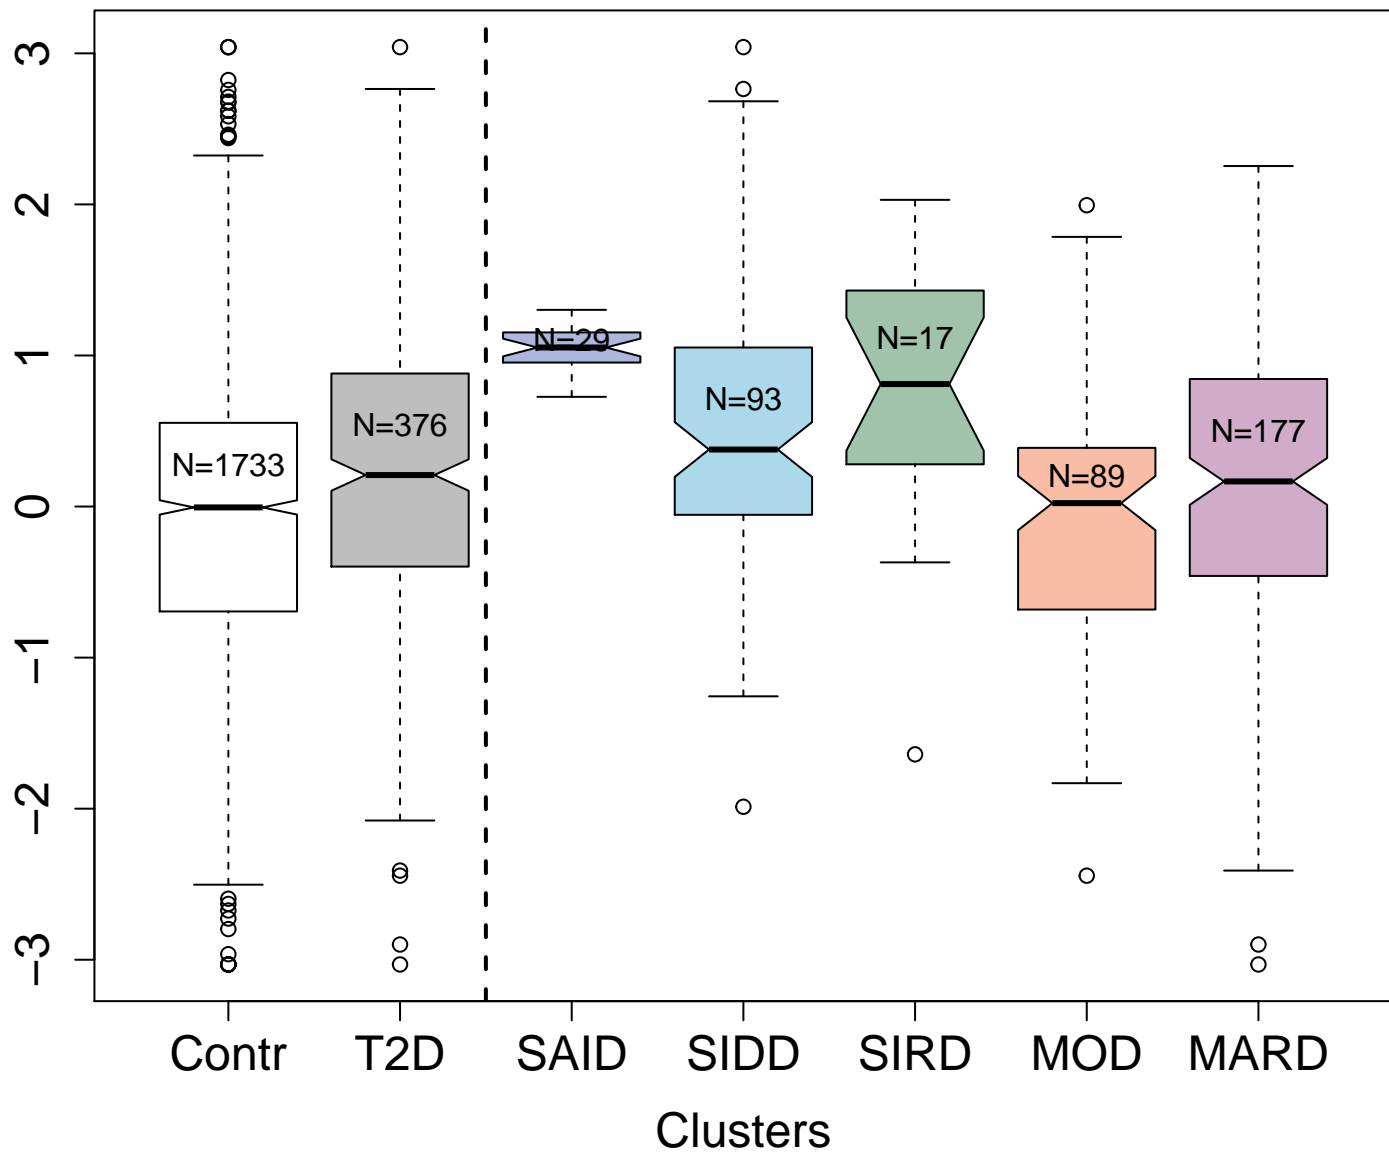

M46601: X - 11470

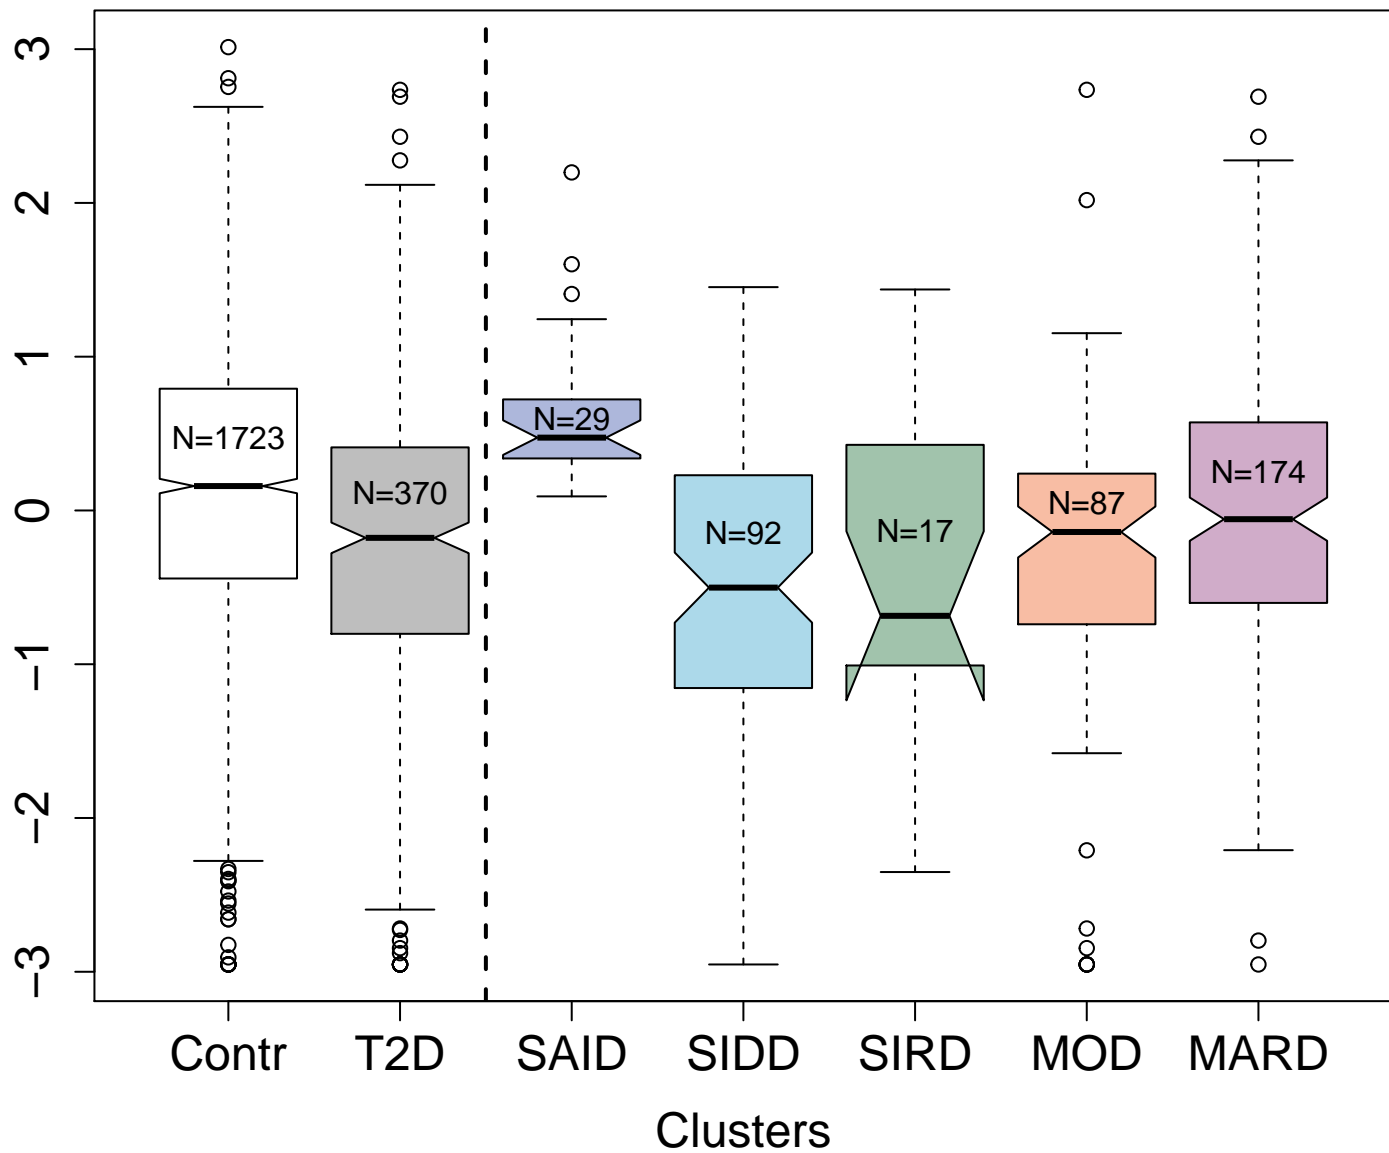

M46364 : X - 12847

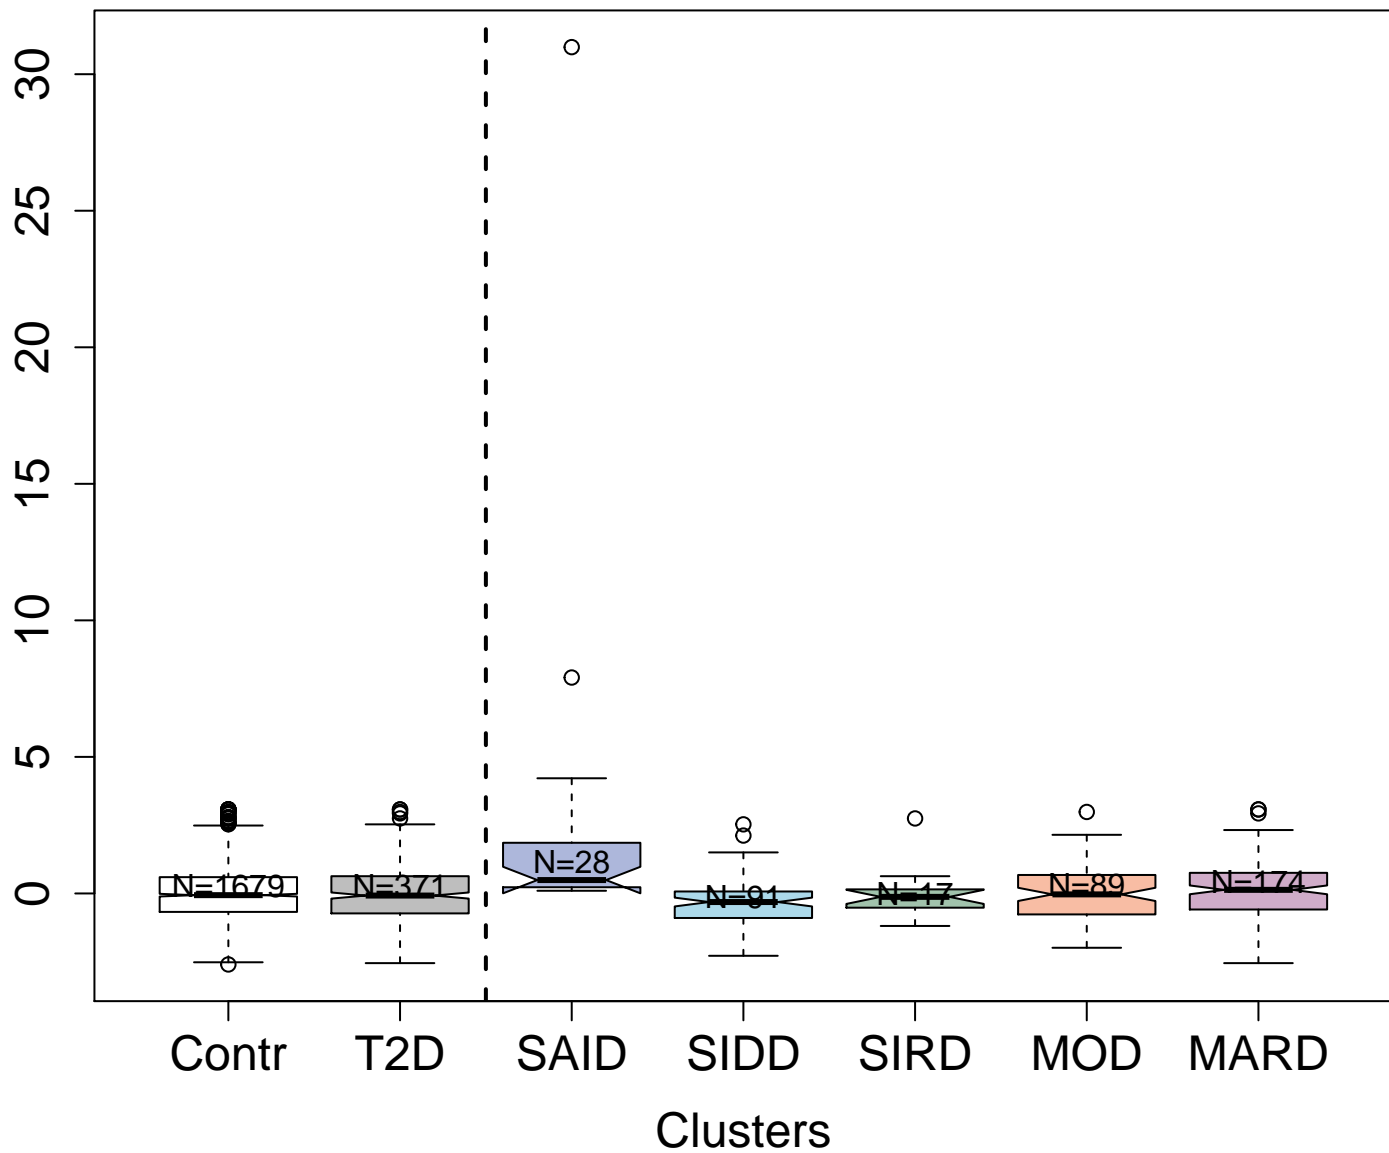

M1365 : myristate (14:0)

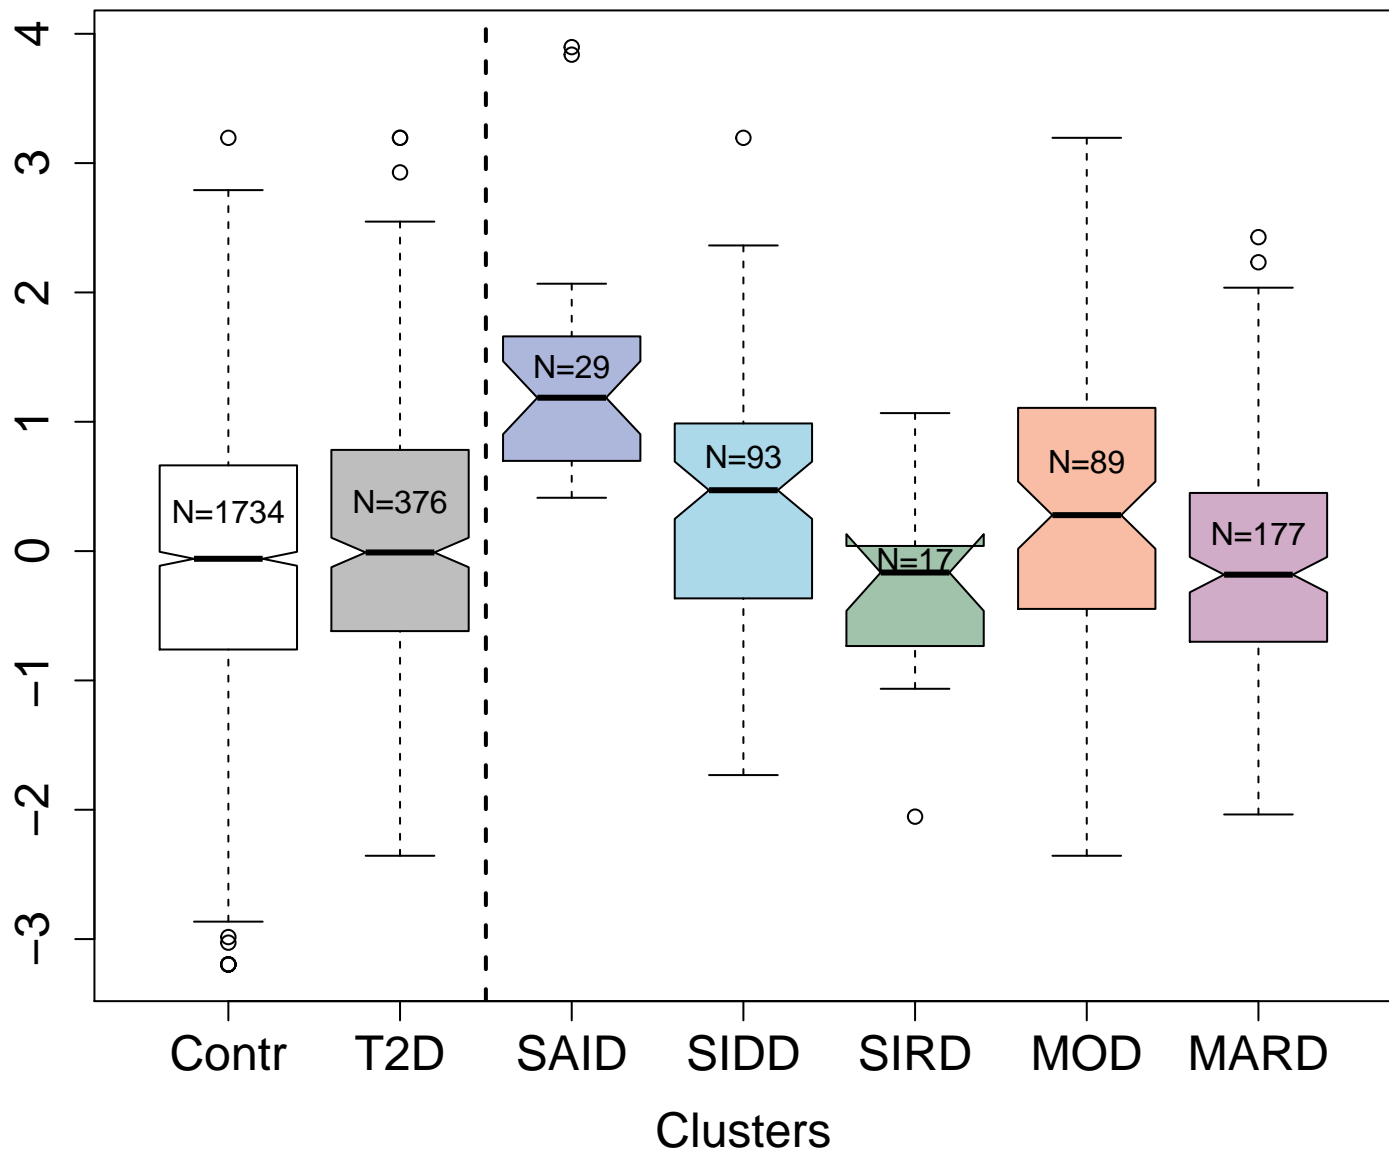



M62863 : 3-formylindole

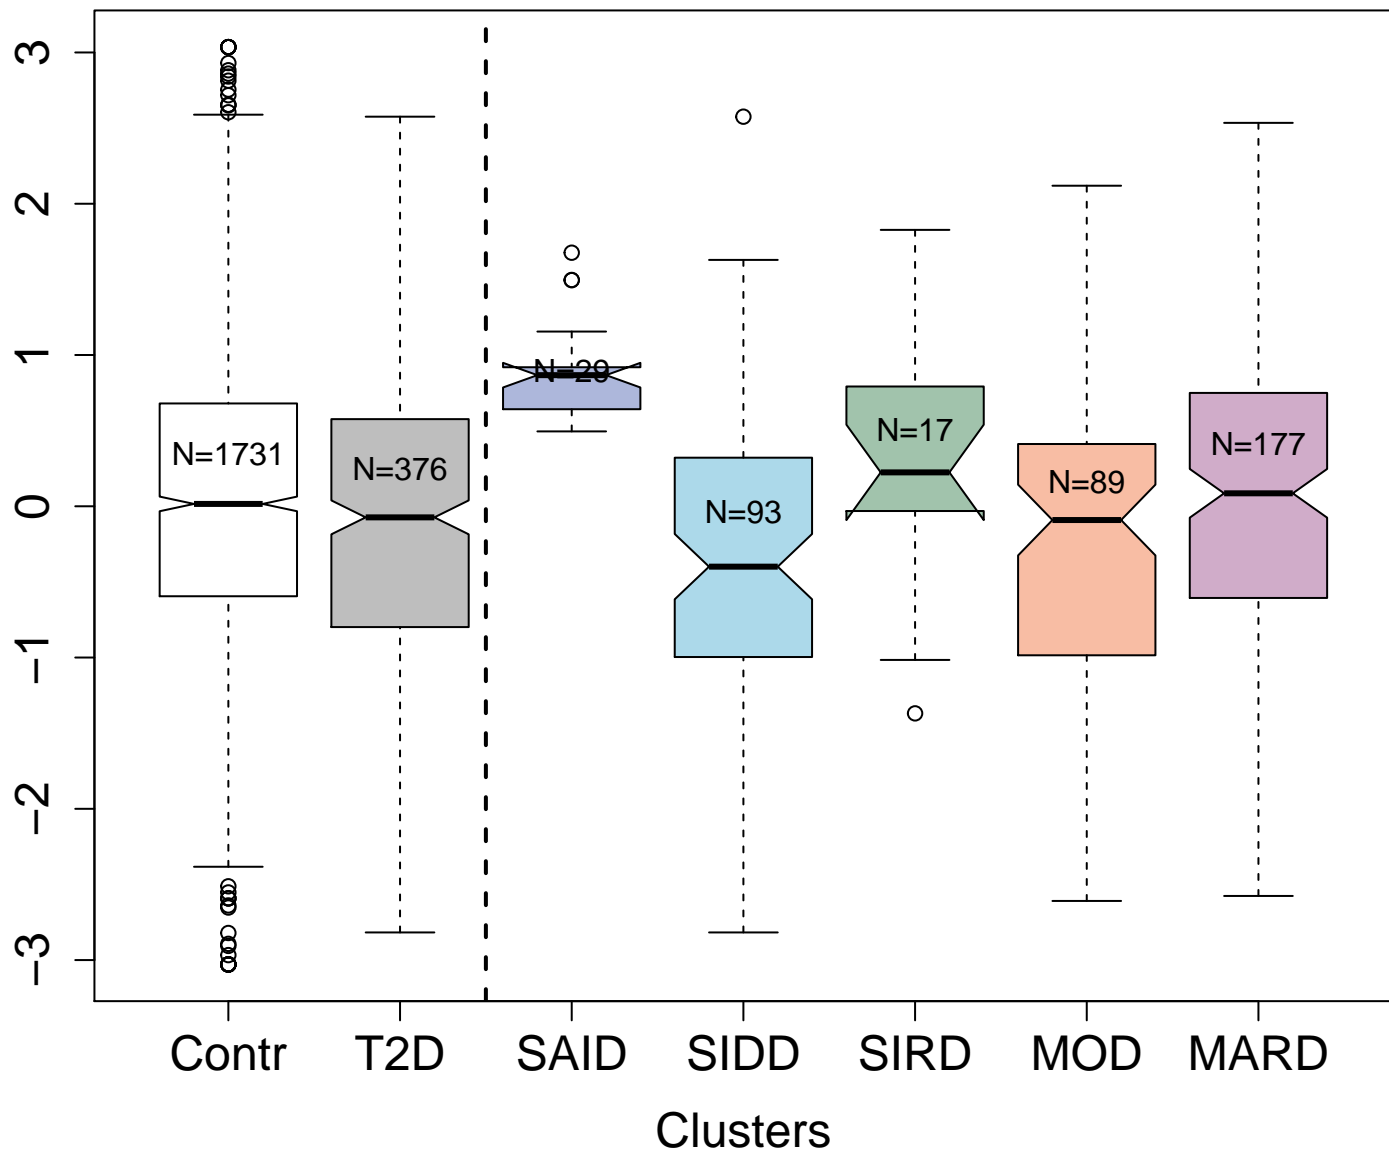

M39592 : S-methylcysteine

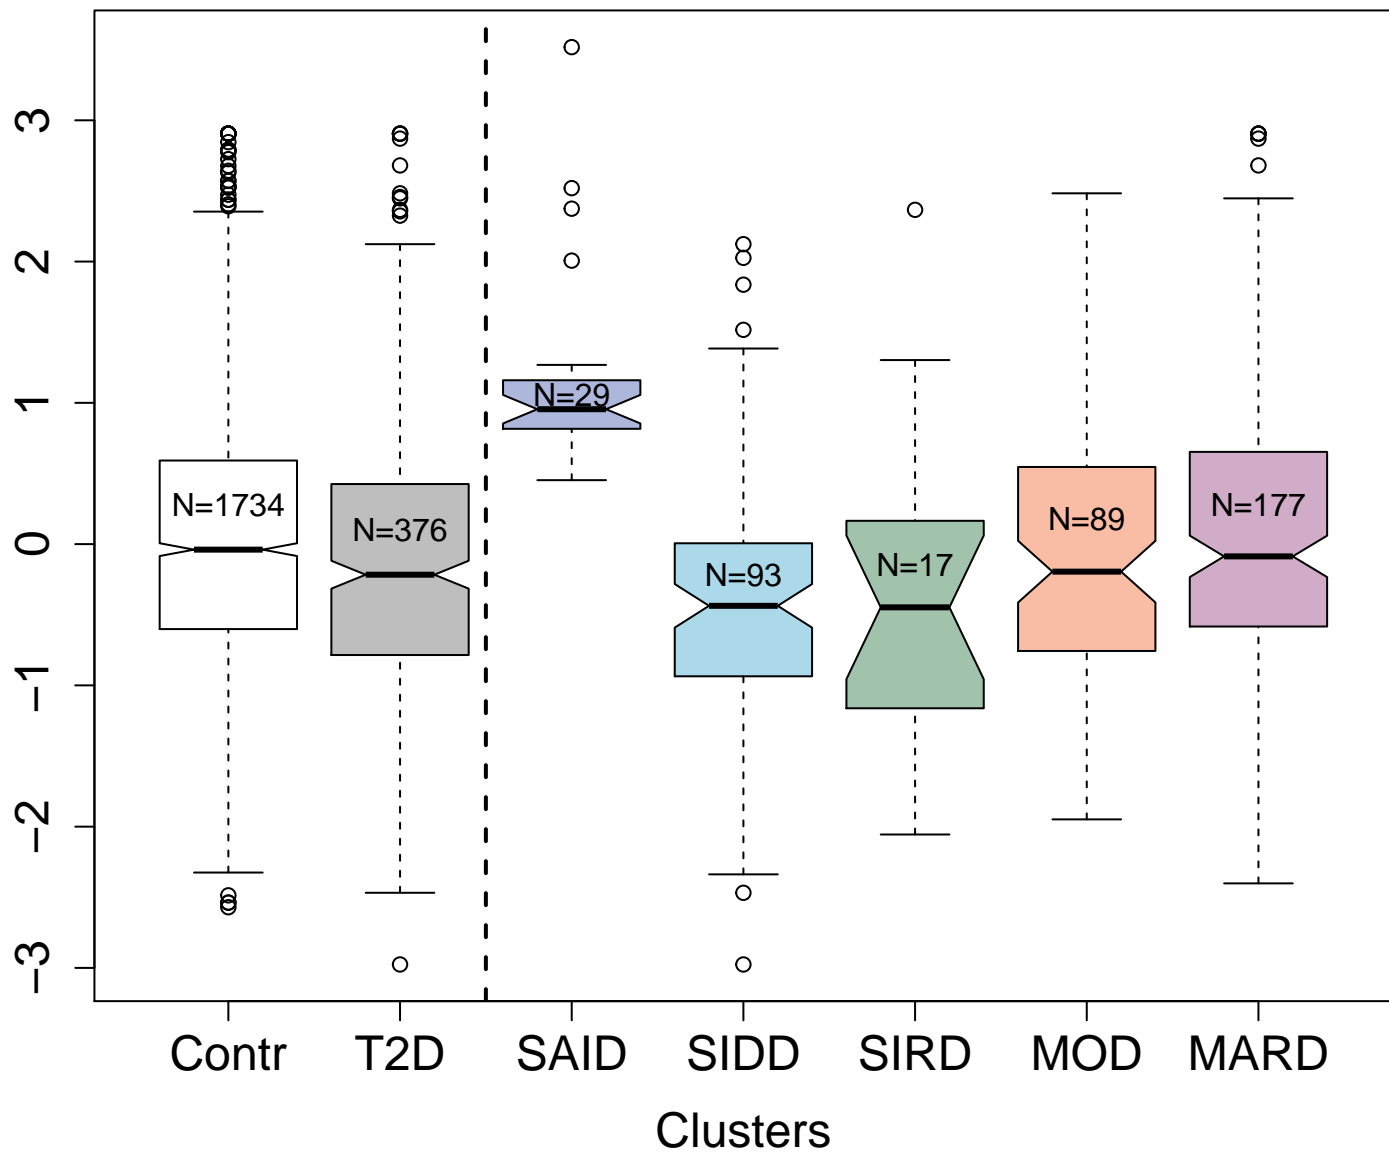

3683 : branched-chain, straight-chain, or cyclopropyl 12:1 fatty

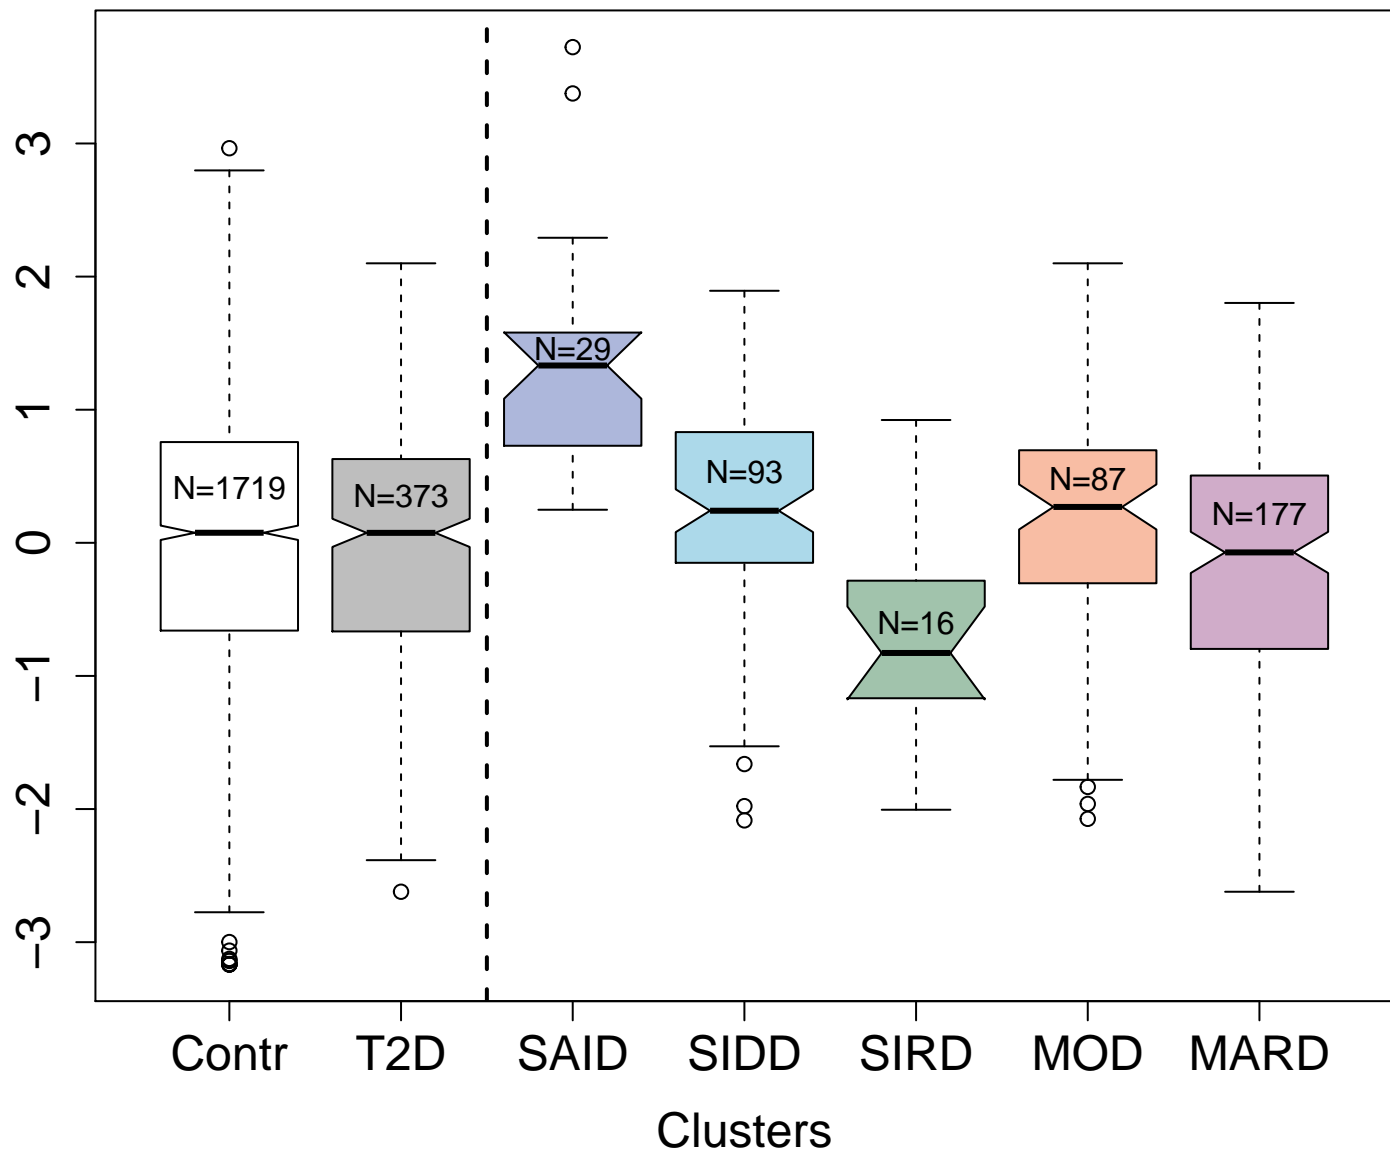

M1600 : phosphoethanolamine

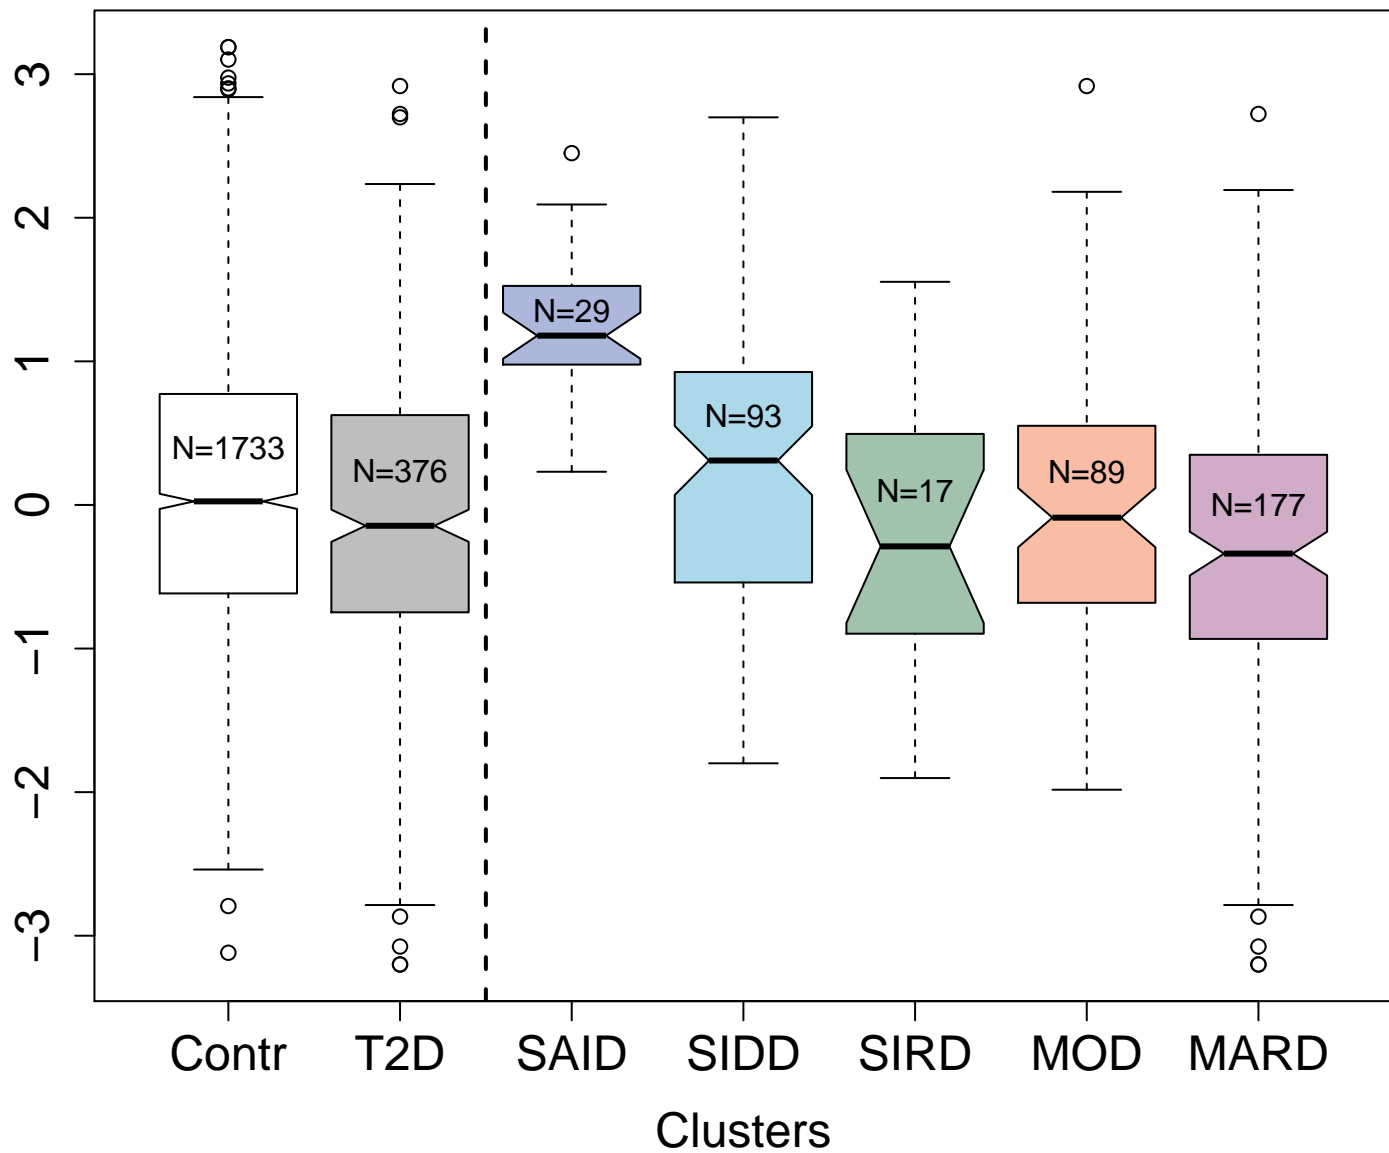

M1585 : N-acetylalanine

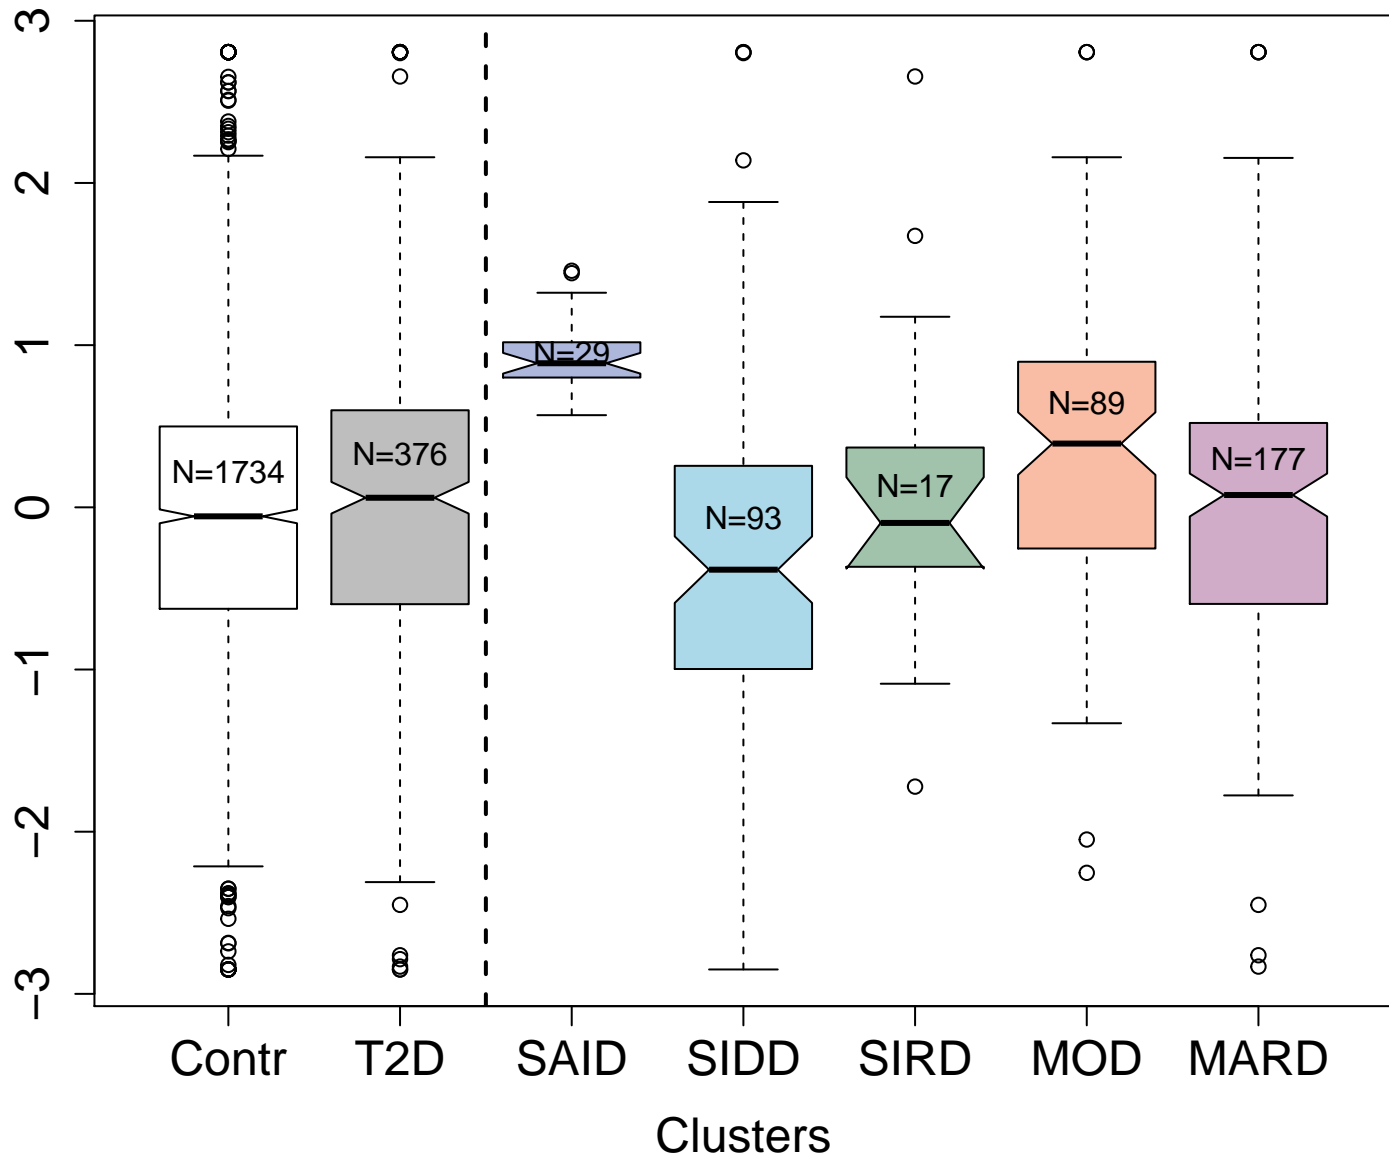

M46512 : X - 21467

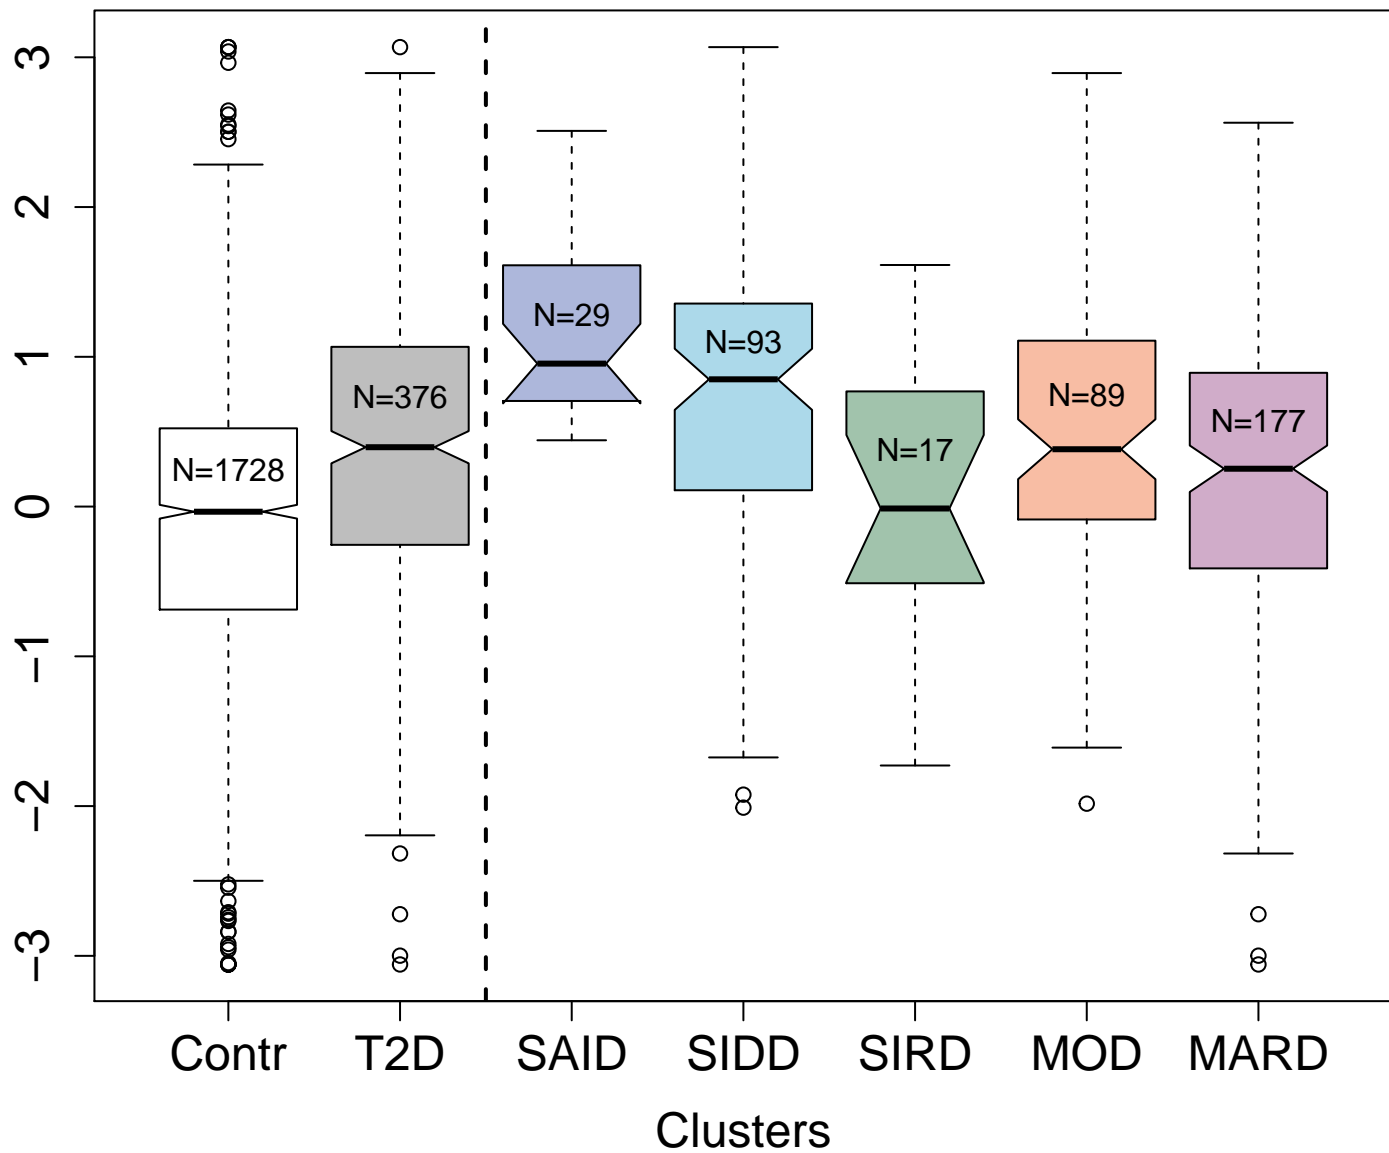

M1494 : 5-oxoproline

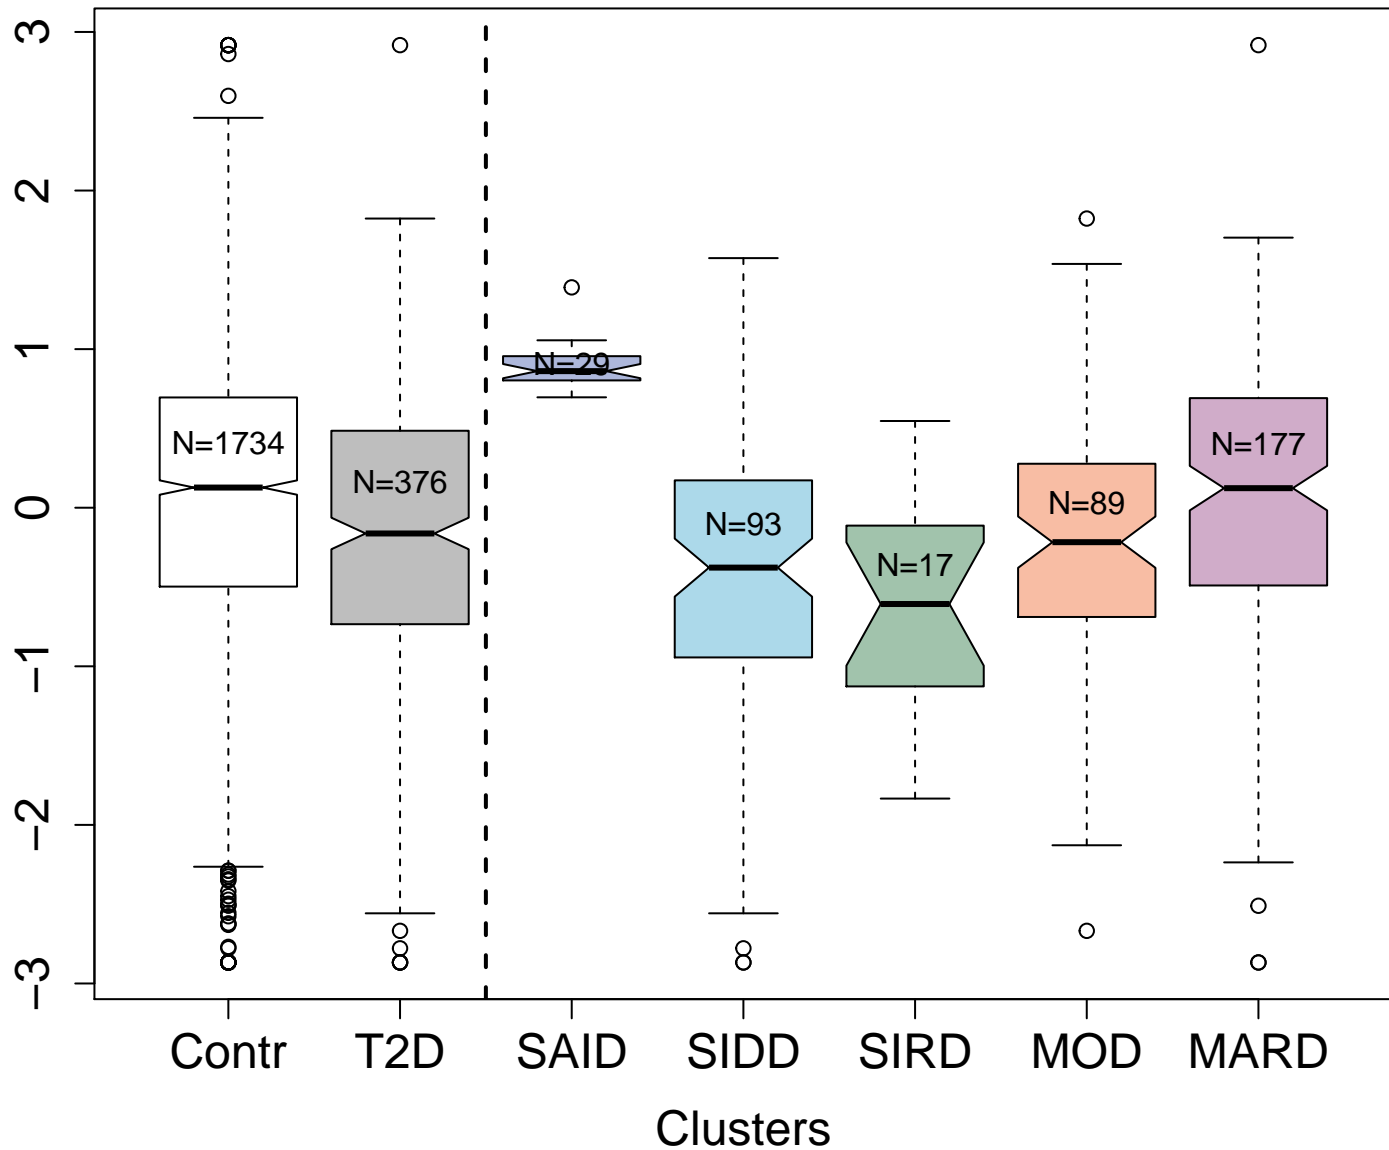

M36808 : dimethylarginine (SDMA + ADMA)

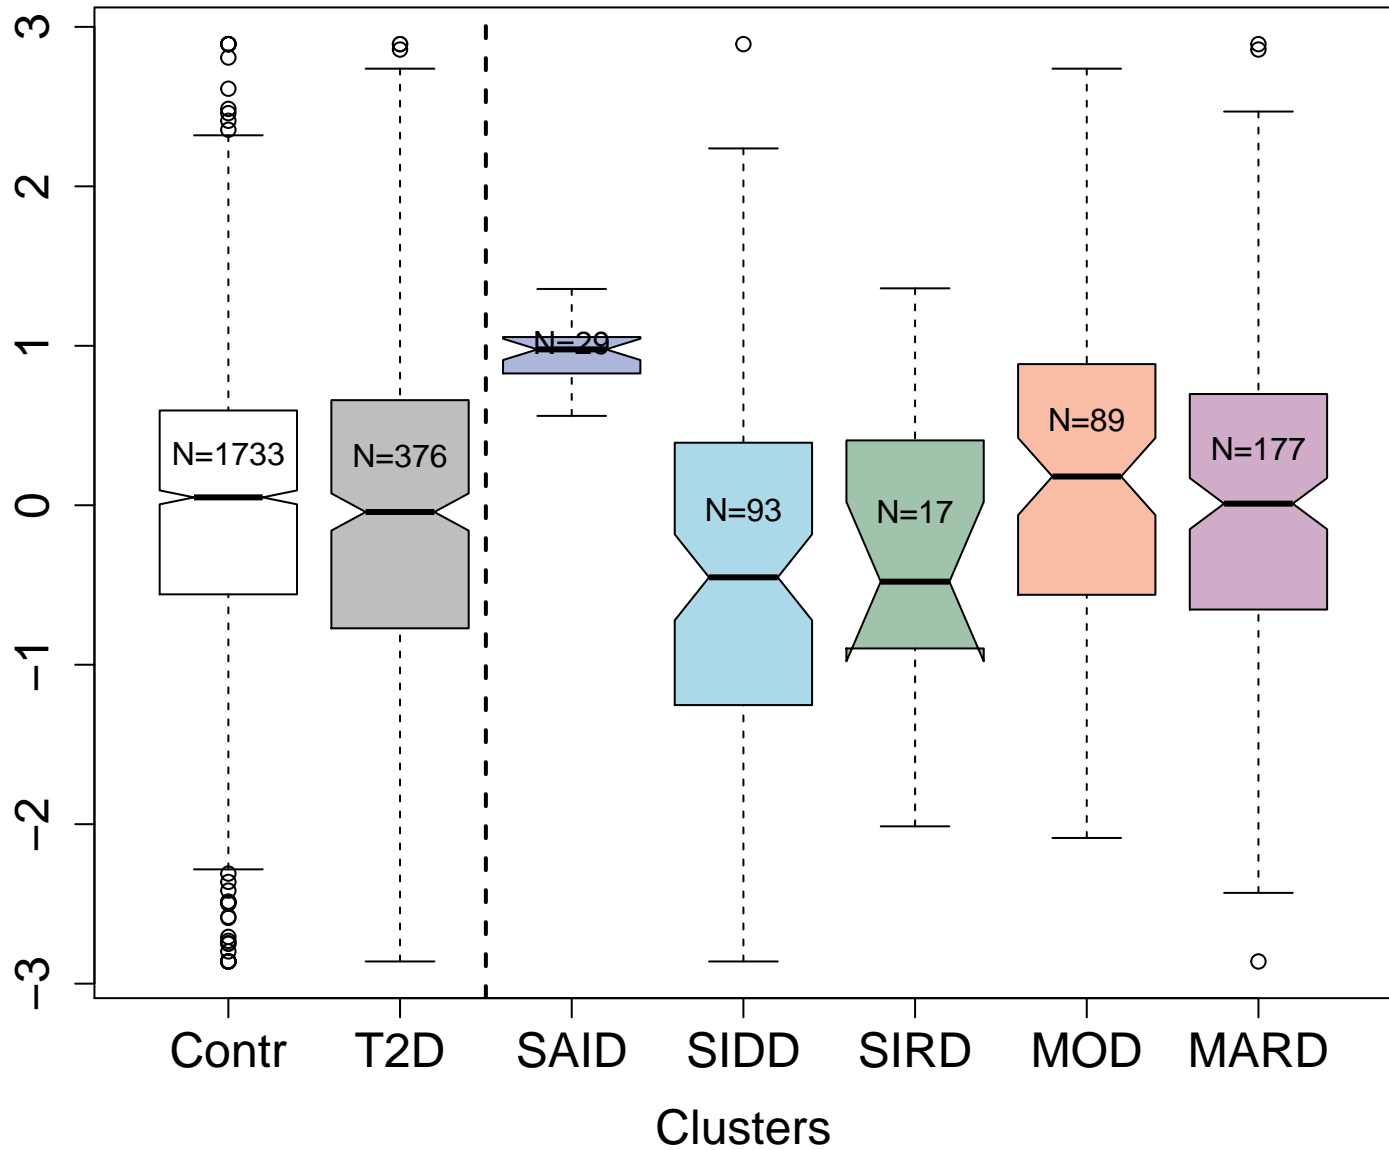



M36747 : deoxycarnitine

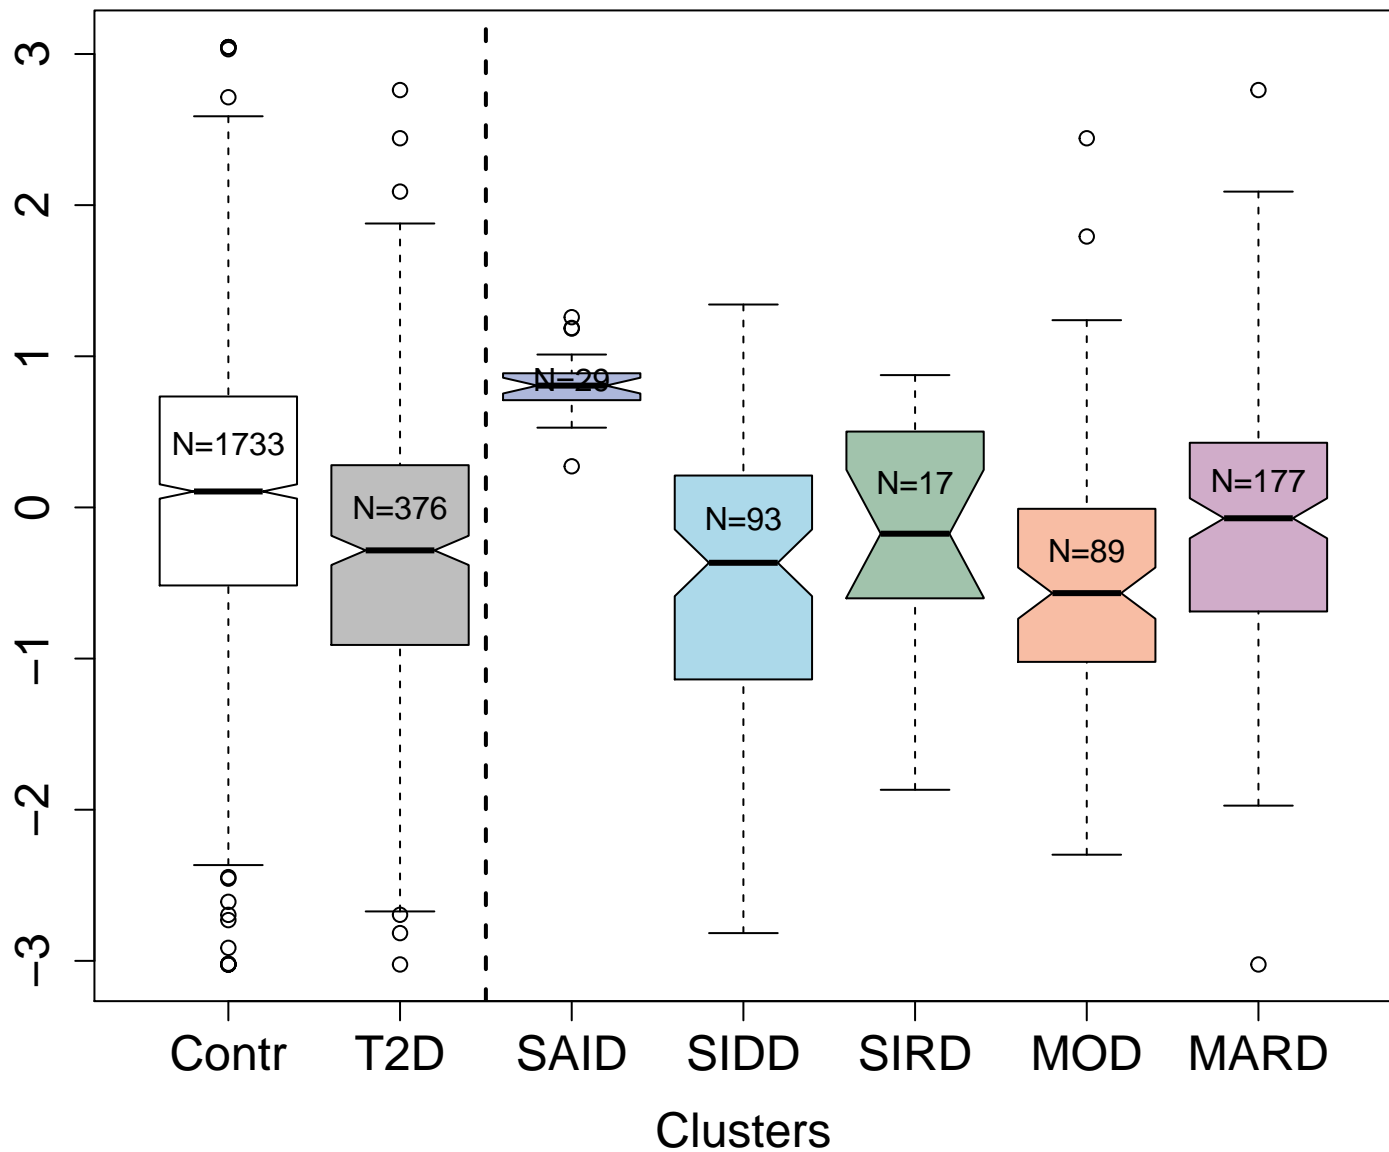

M52954 : sitagliptin

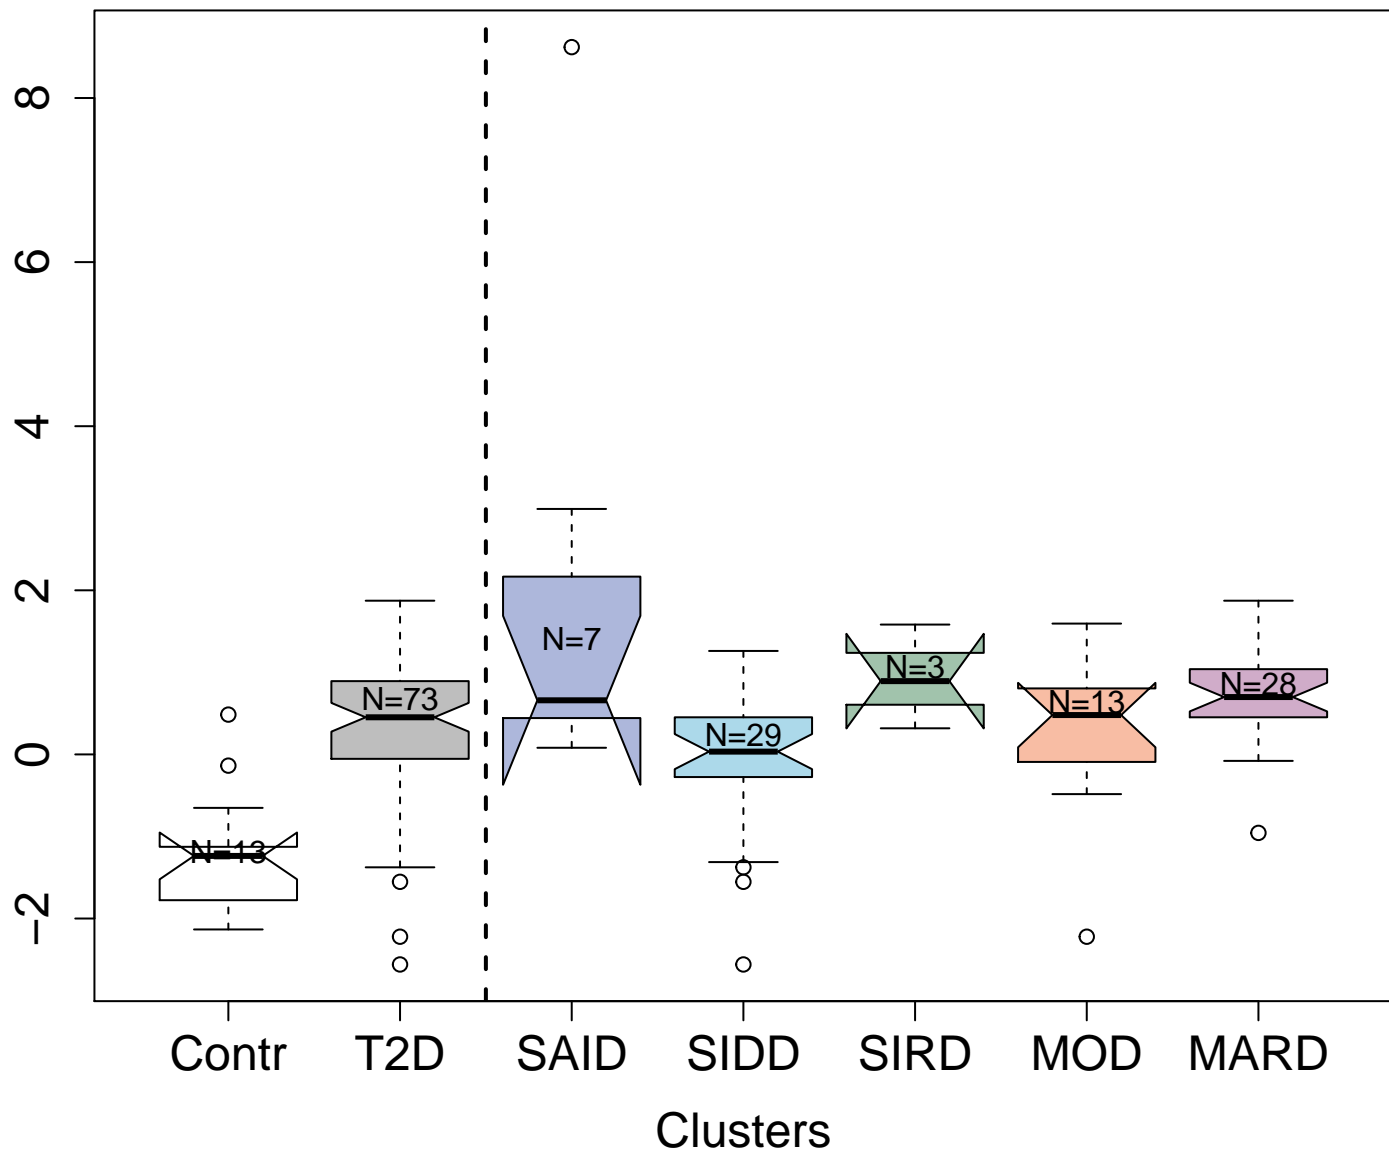

M47642 : X - 12101

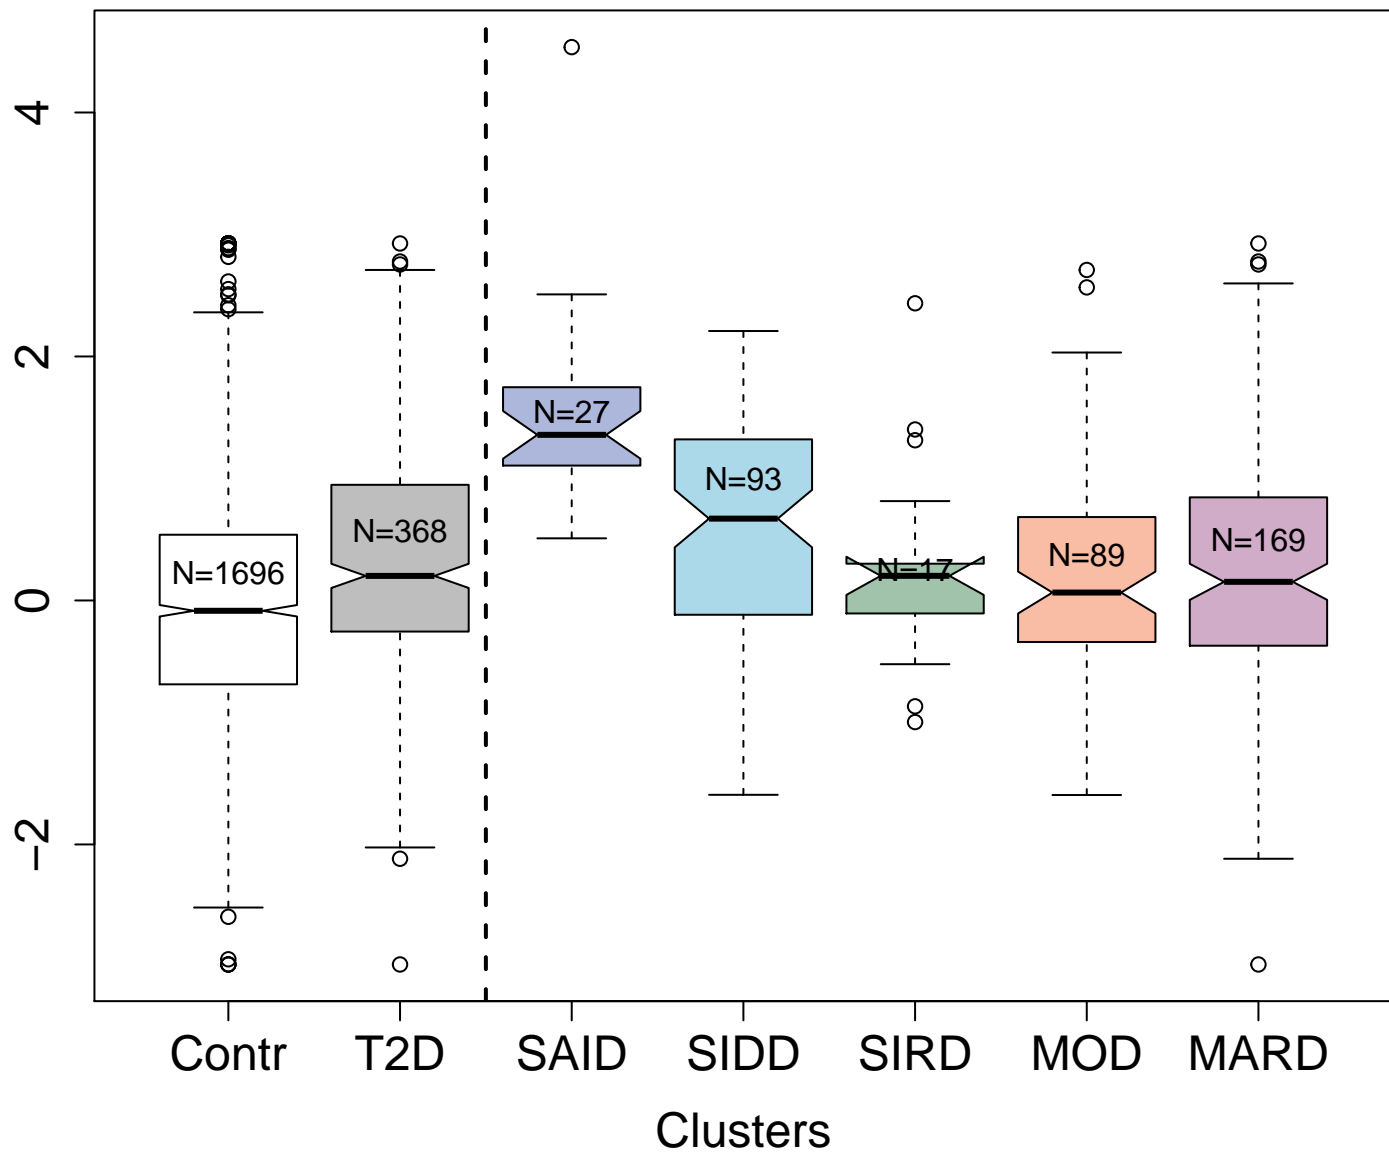

M33935 : piperine

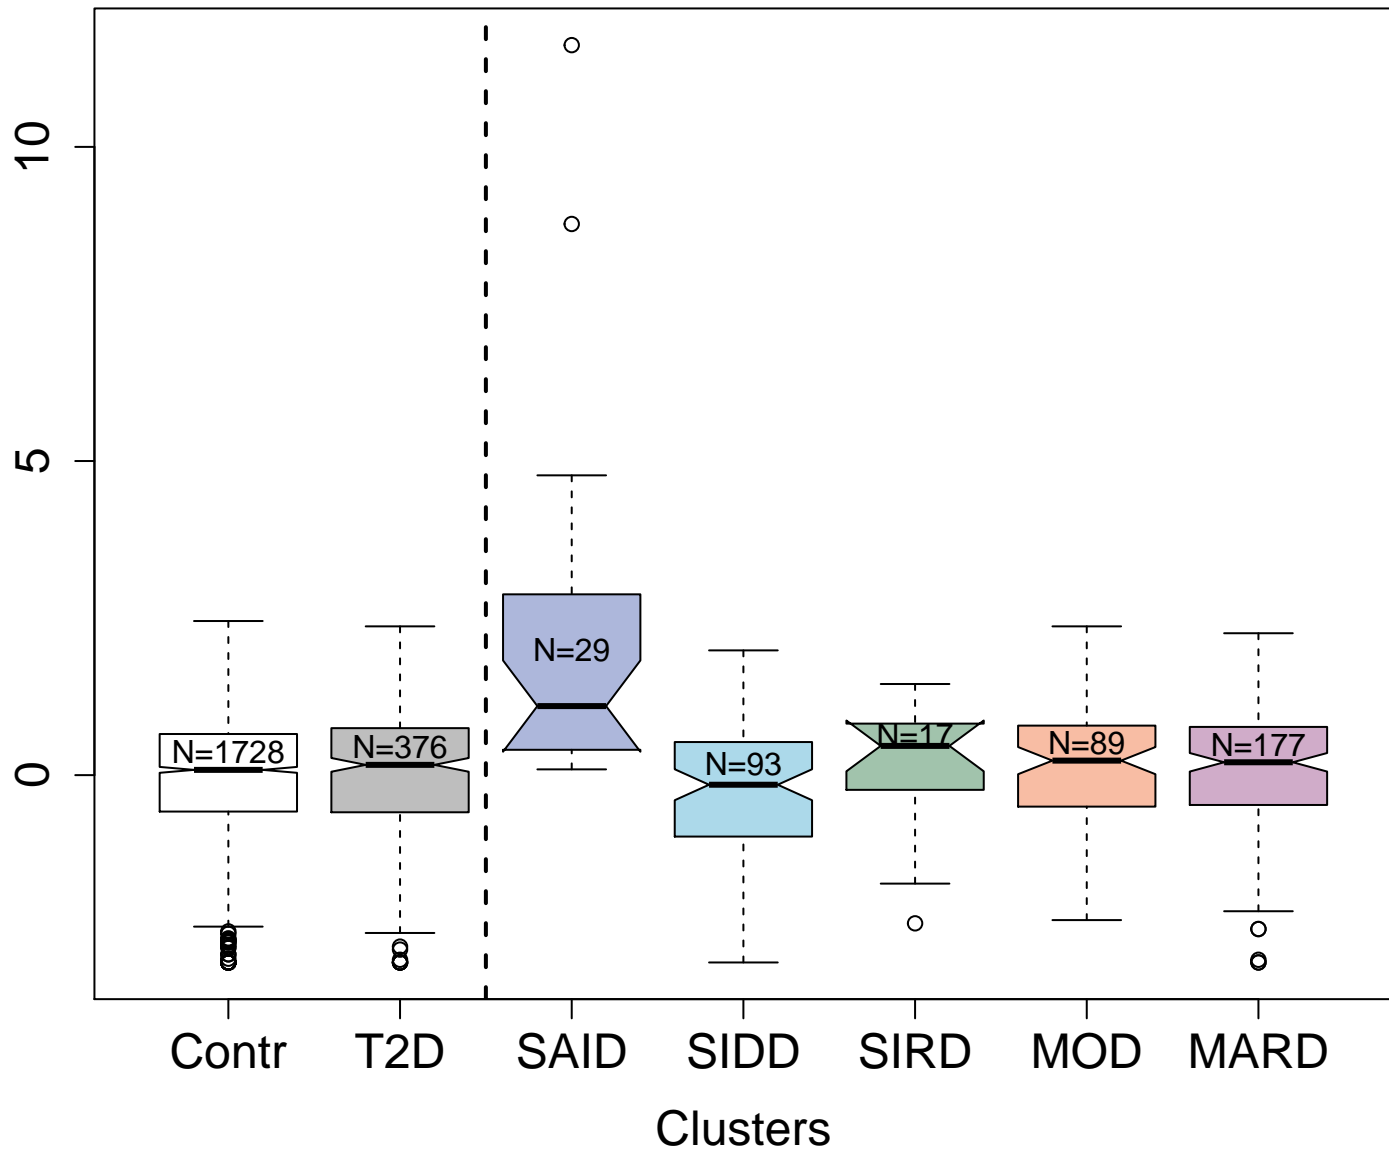

M46632 : X - 14056

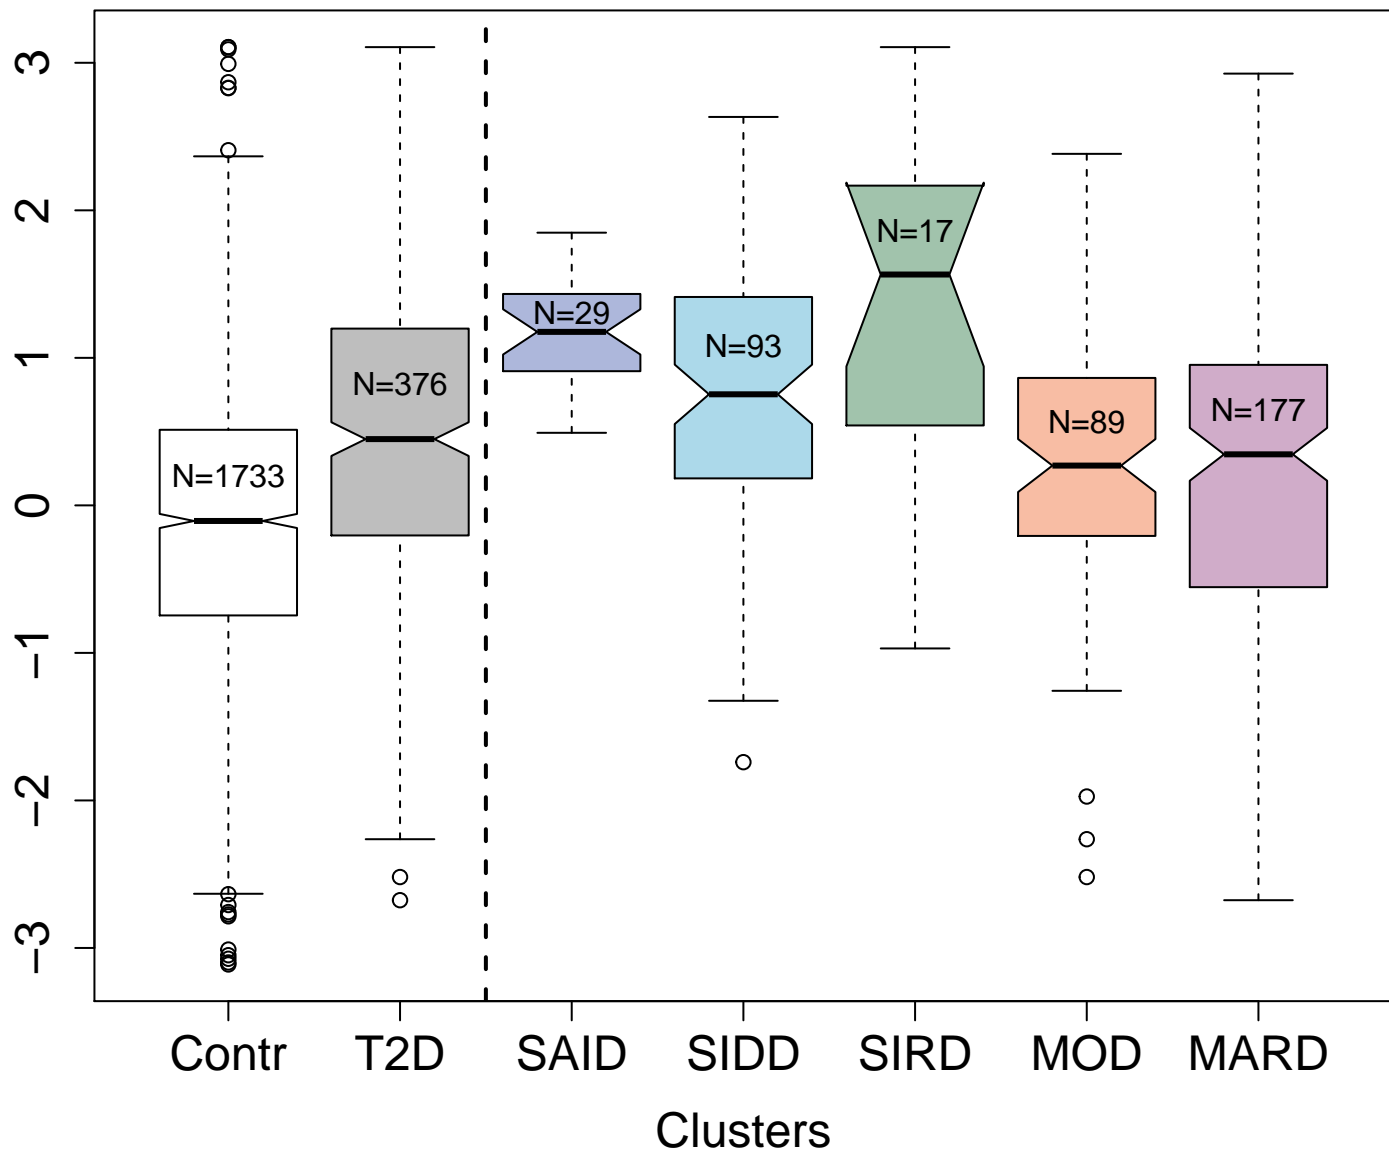

M1649 : valine

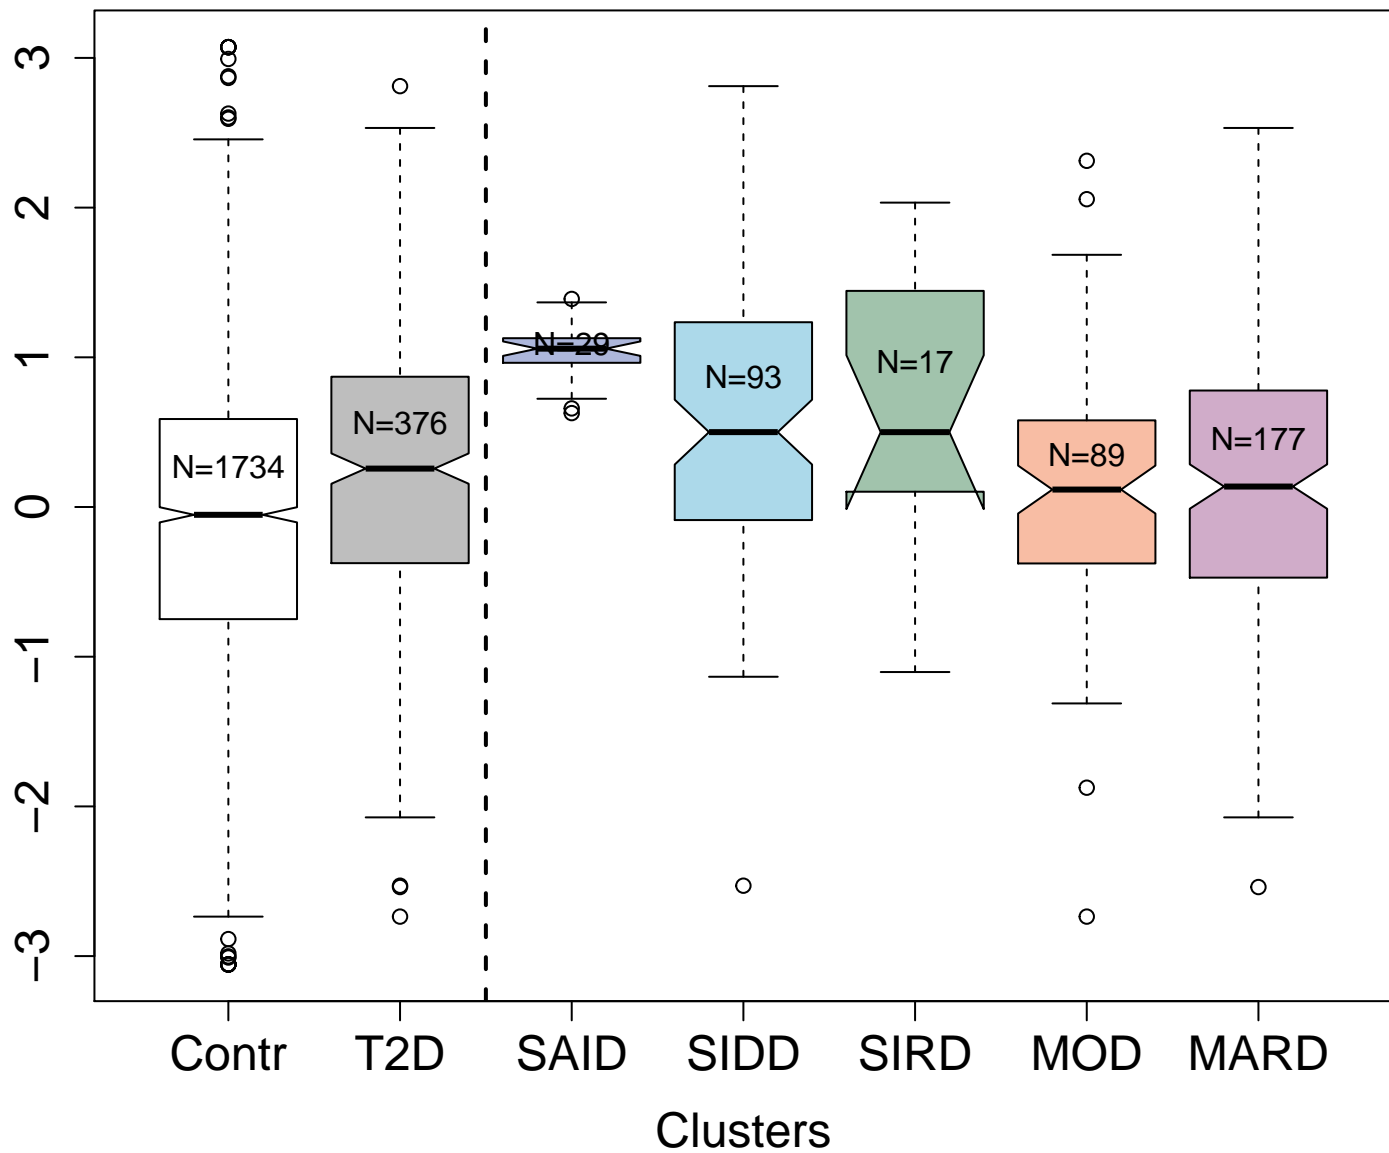

M58 : glycine

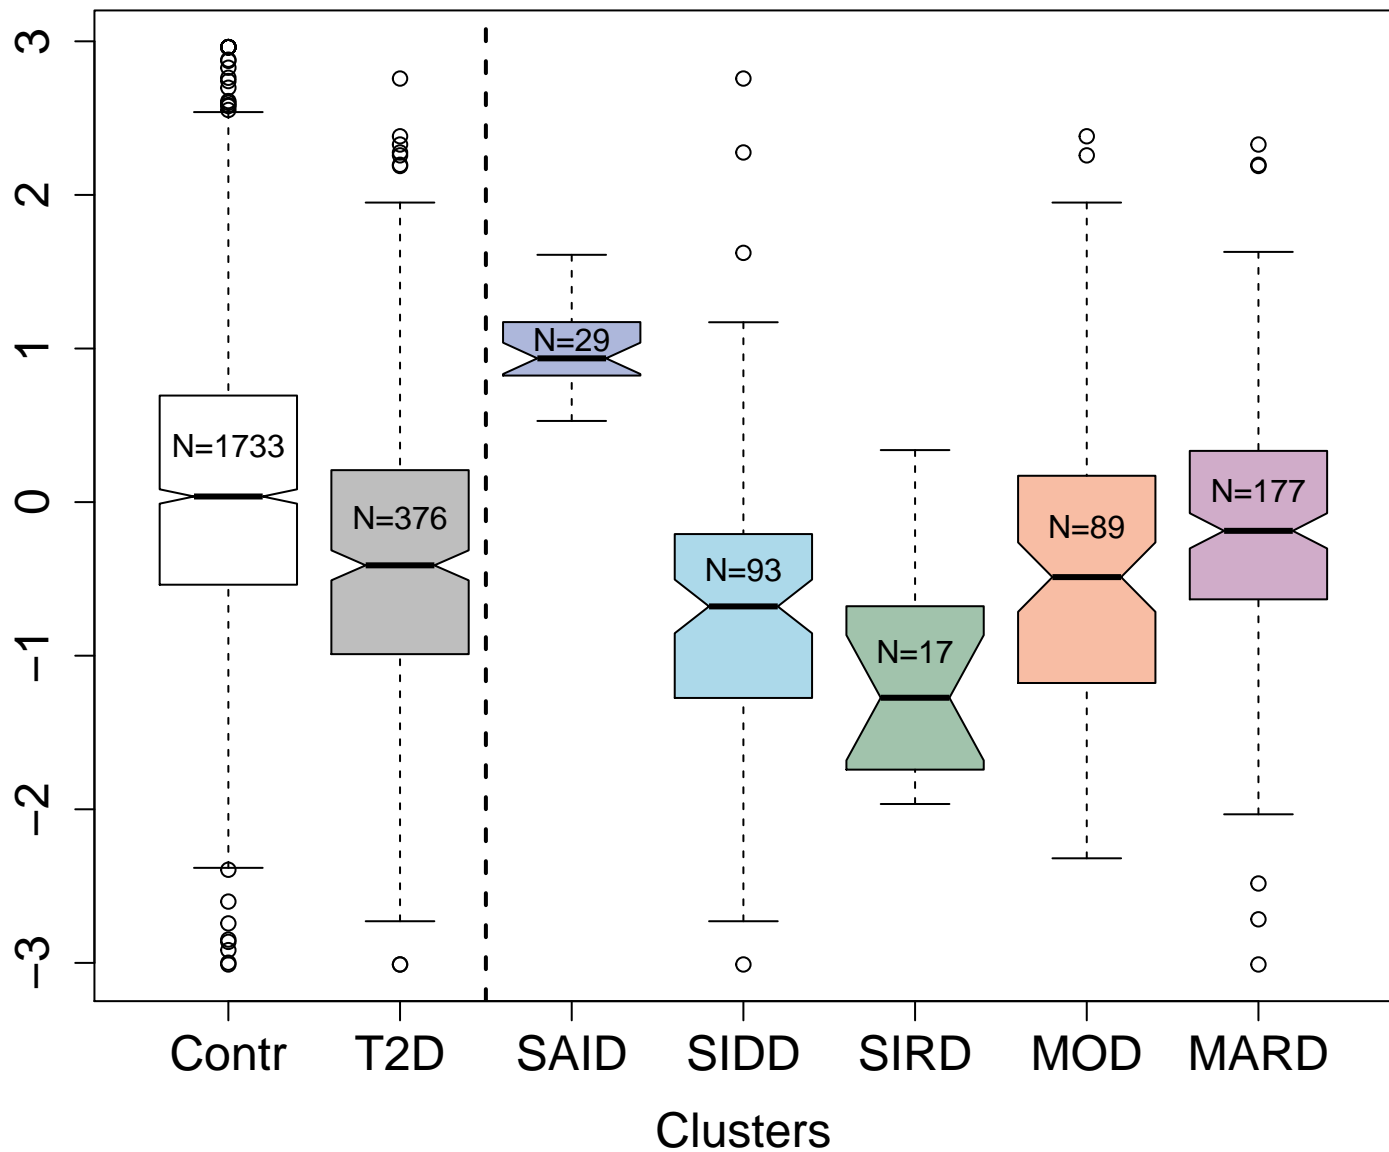

M22132 : alpha-hydroxyisocaproate

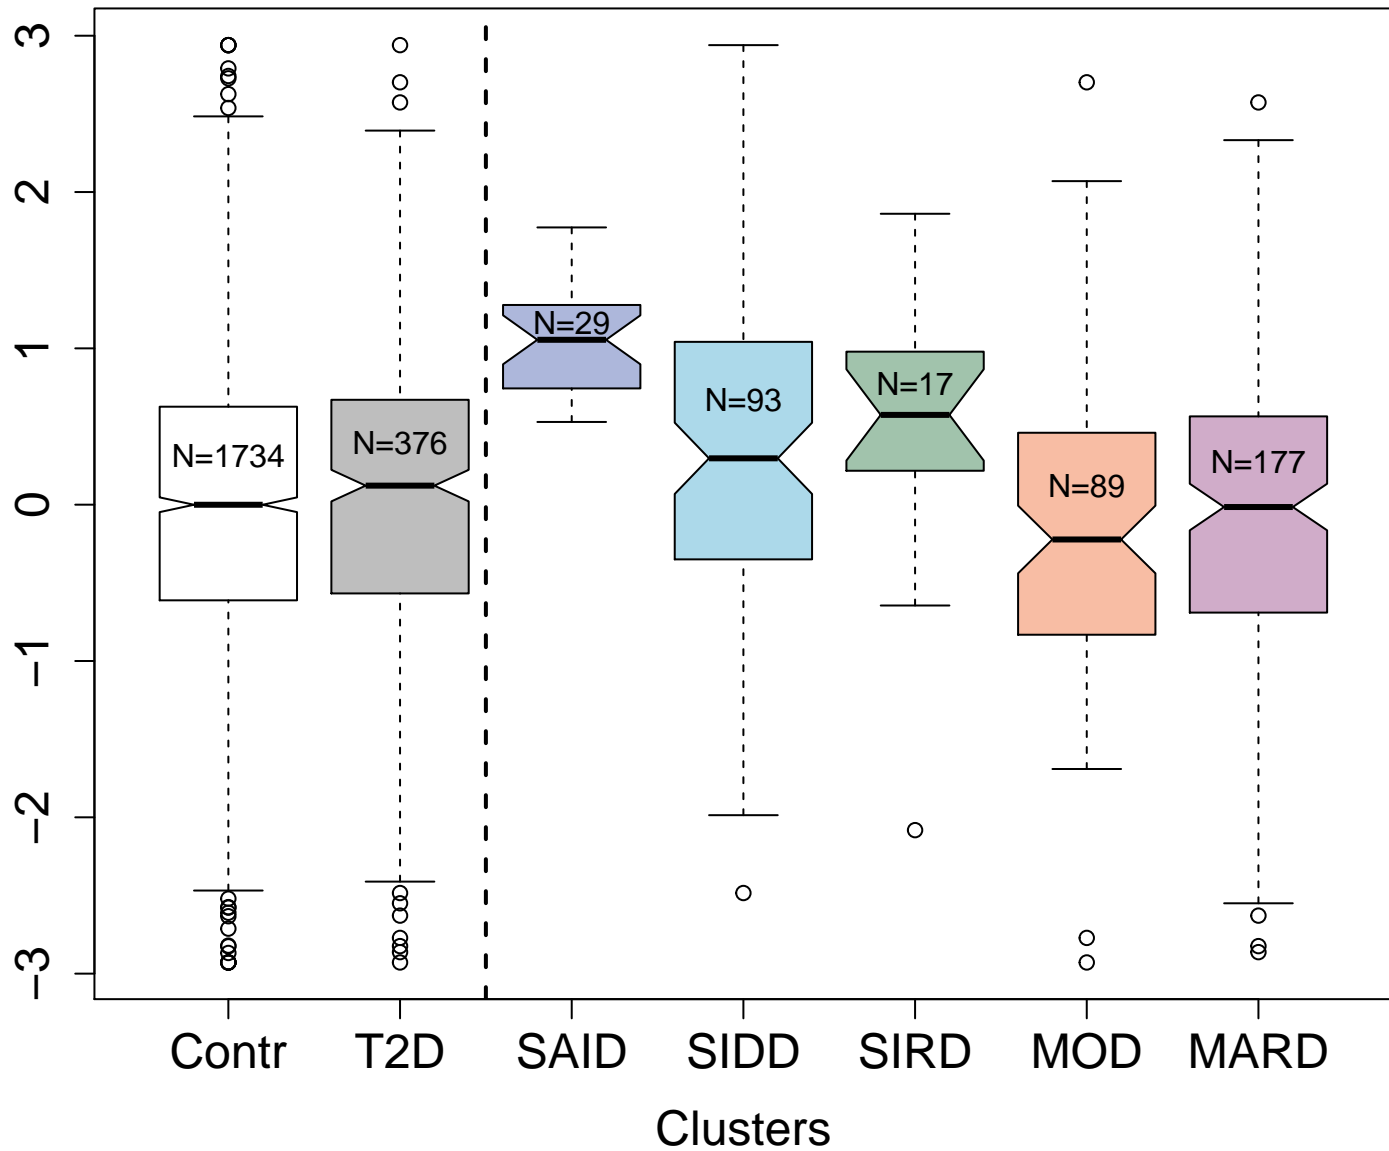



M63151 : N,N-dimethylalanine

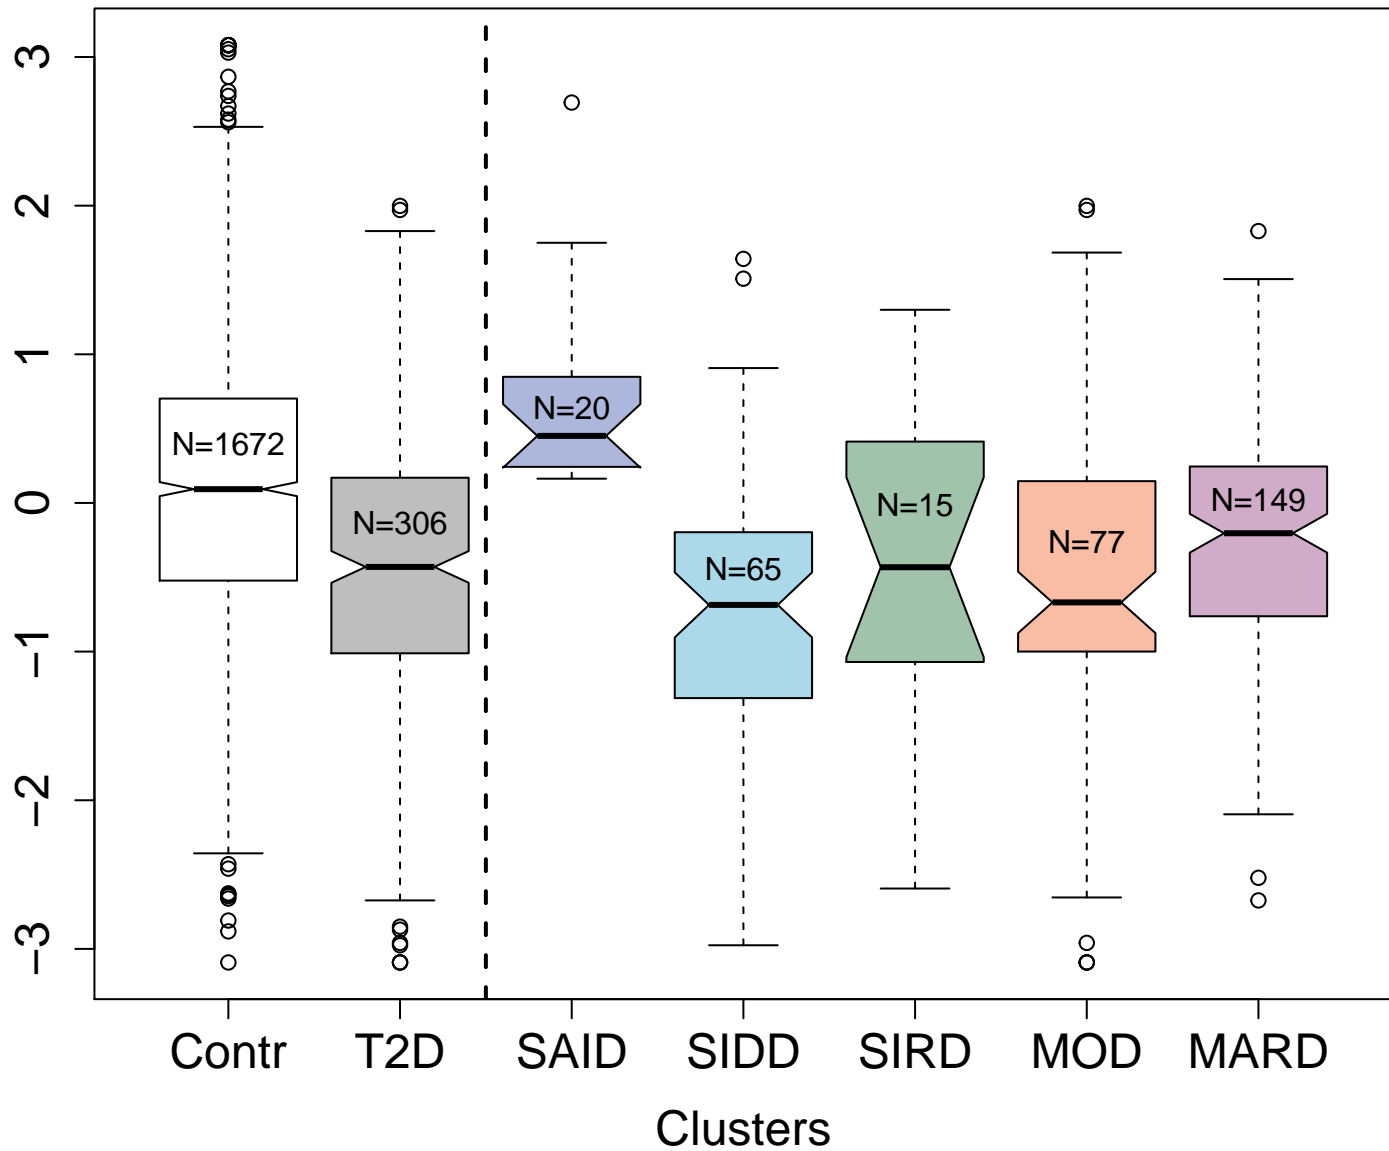

M1638 : arginine

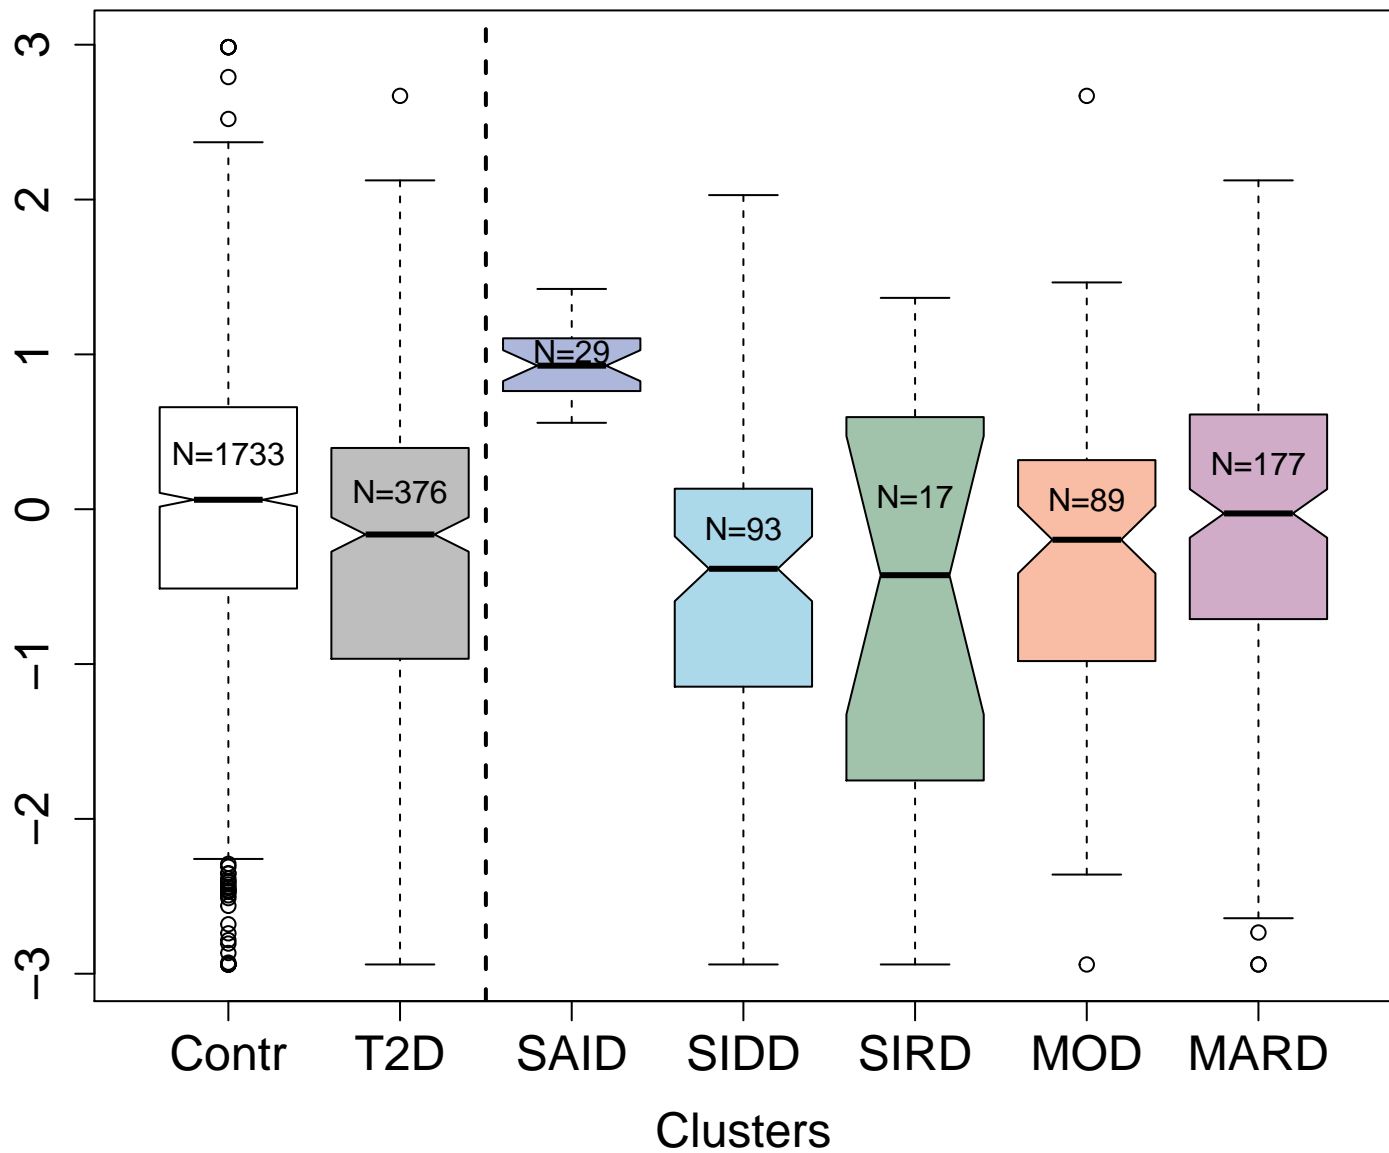

M37455 : glycerophosphoethanolamine

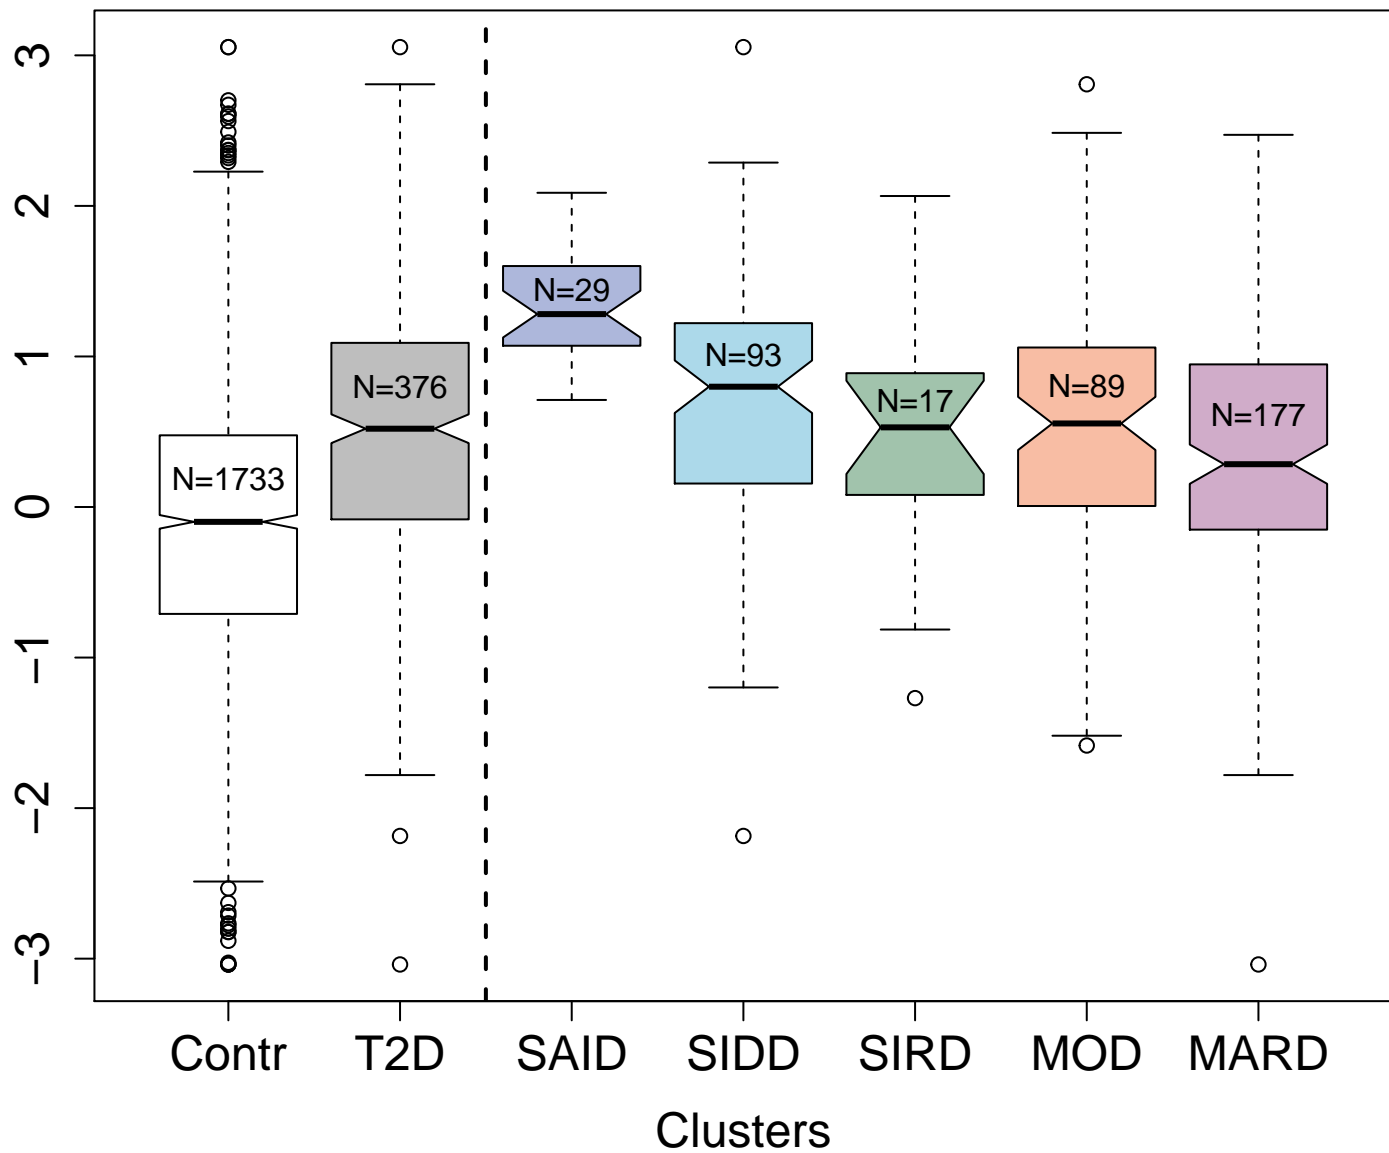

M18494 : taurochenodeoxycholate

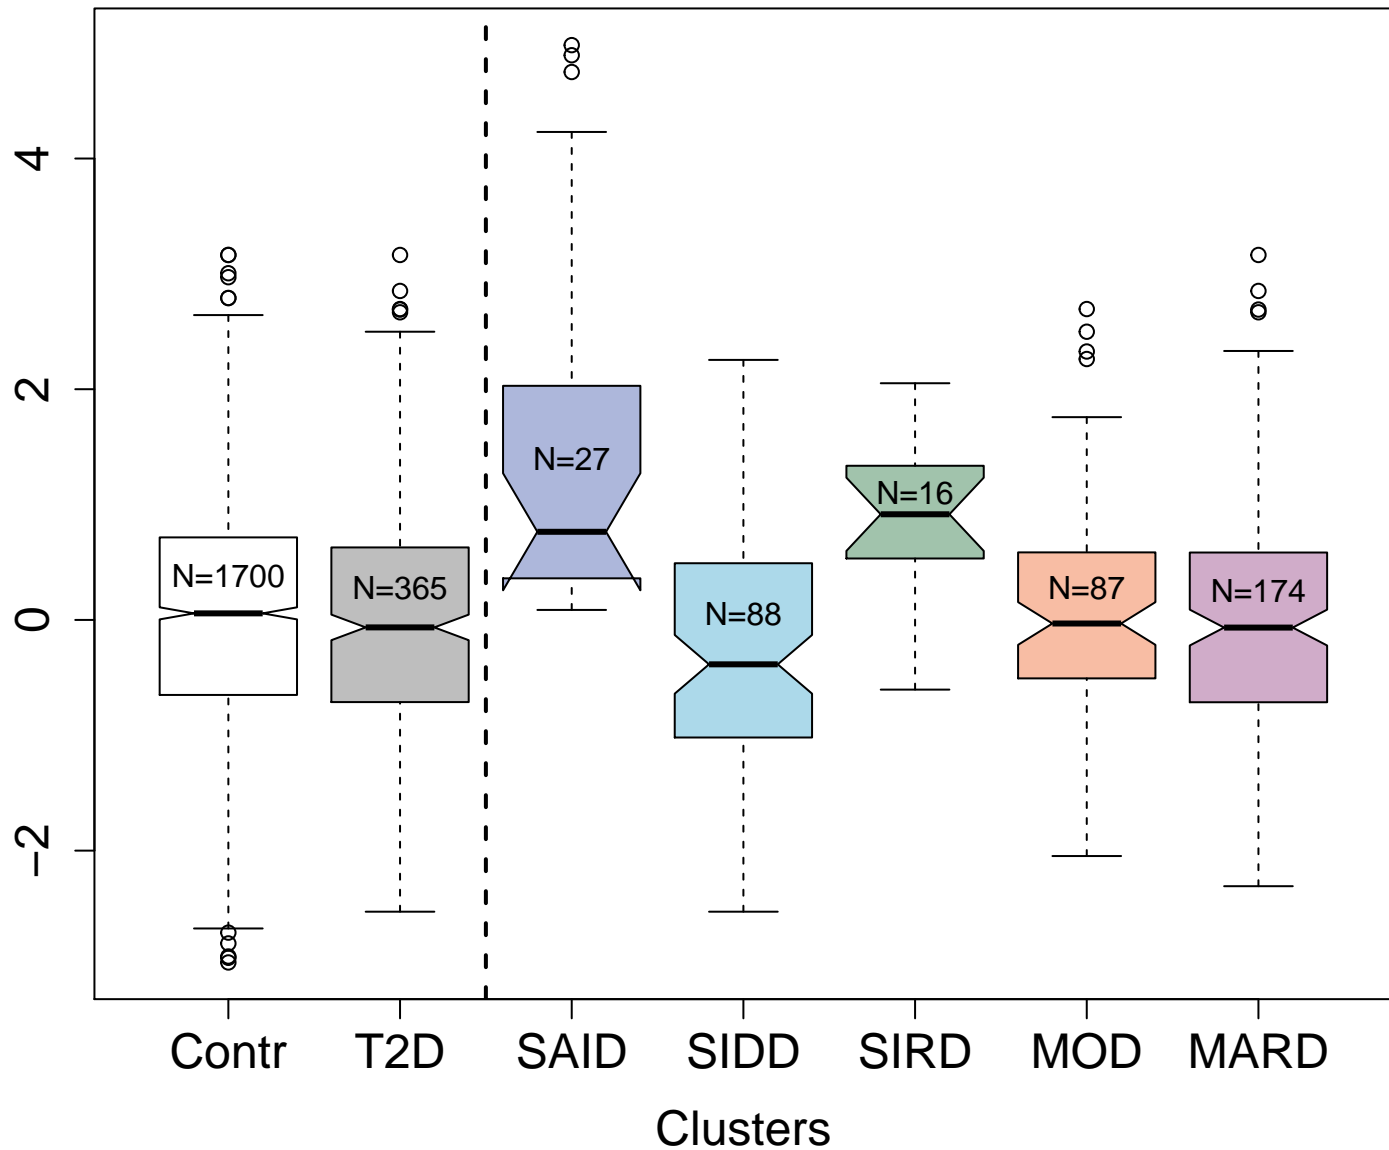

M57477 : sphingomyelin (d18:1/22:2, d18:2/22:1, d16:1/24:2)

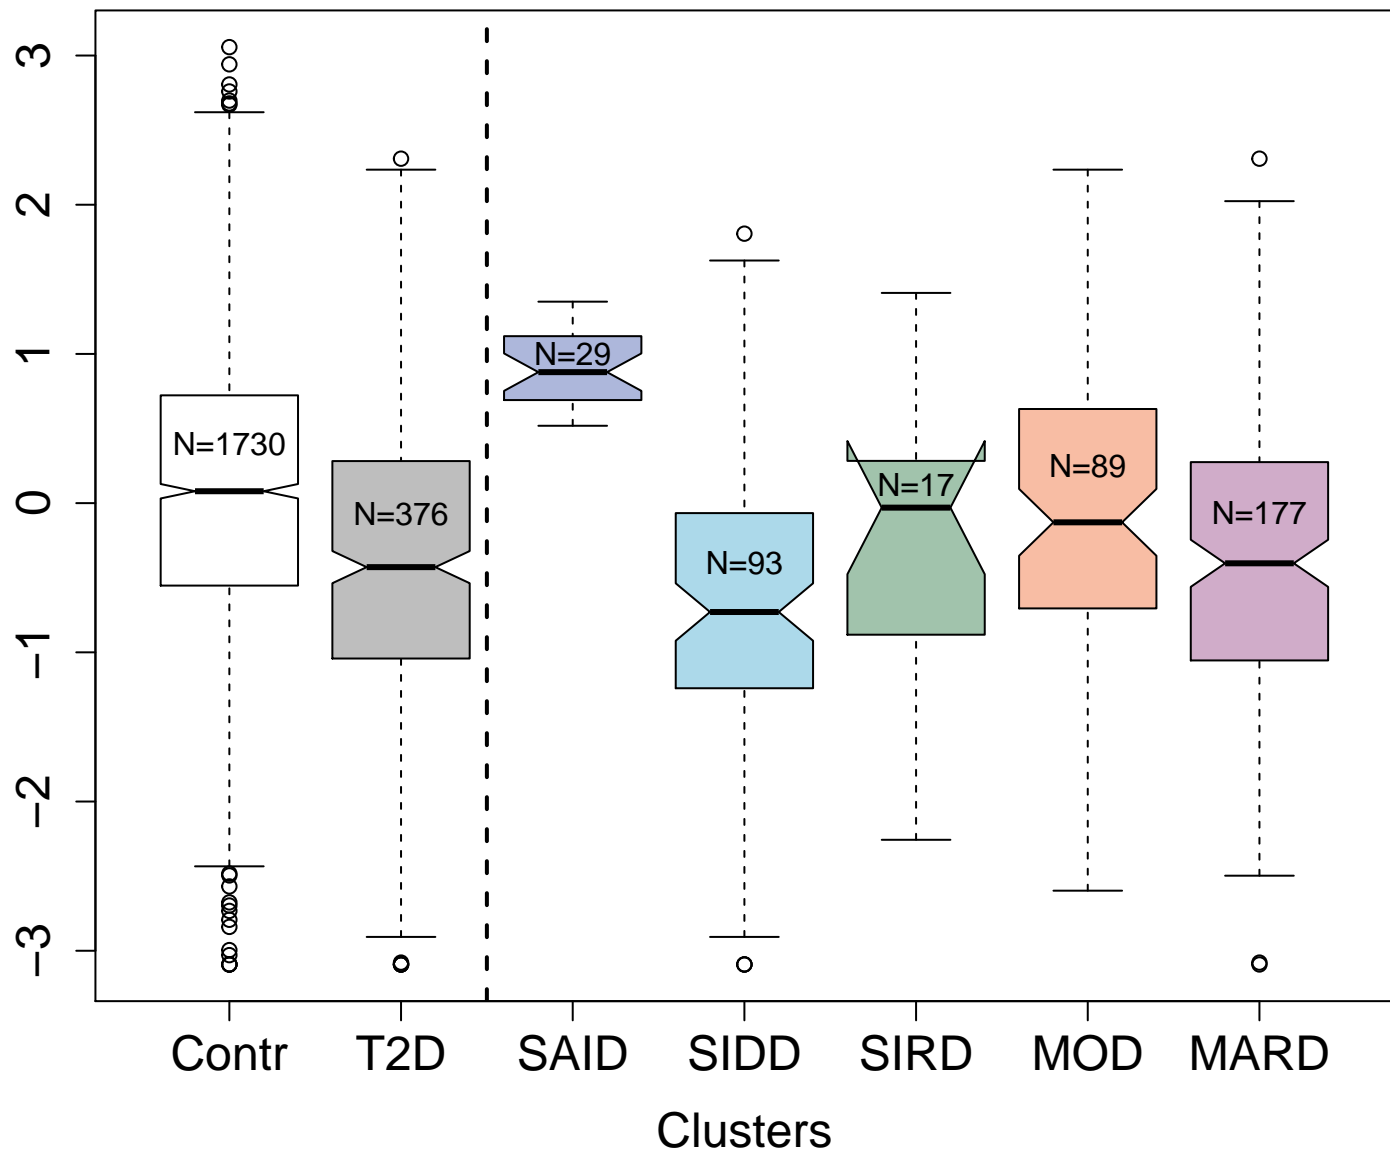

M63109 : 2R,3R-dihydroxybutyrate

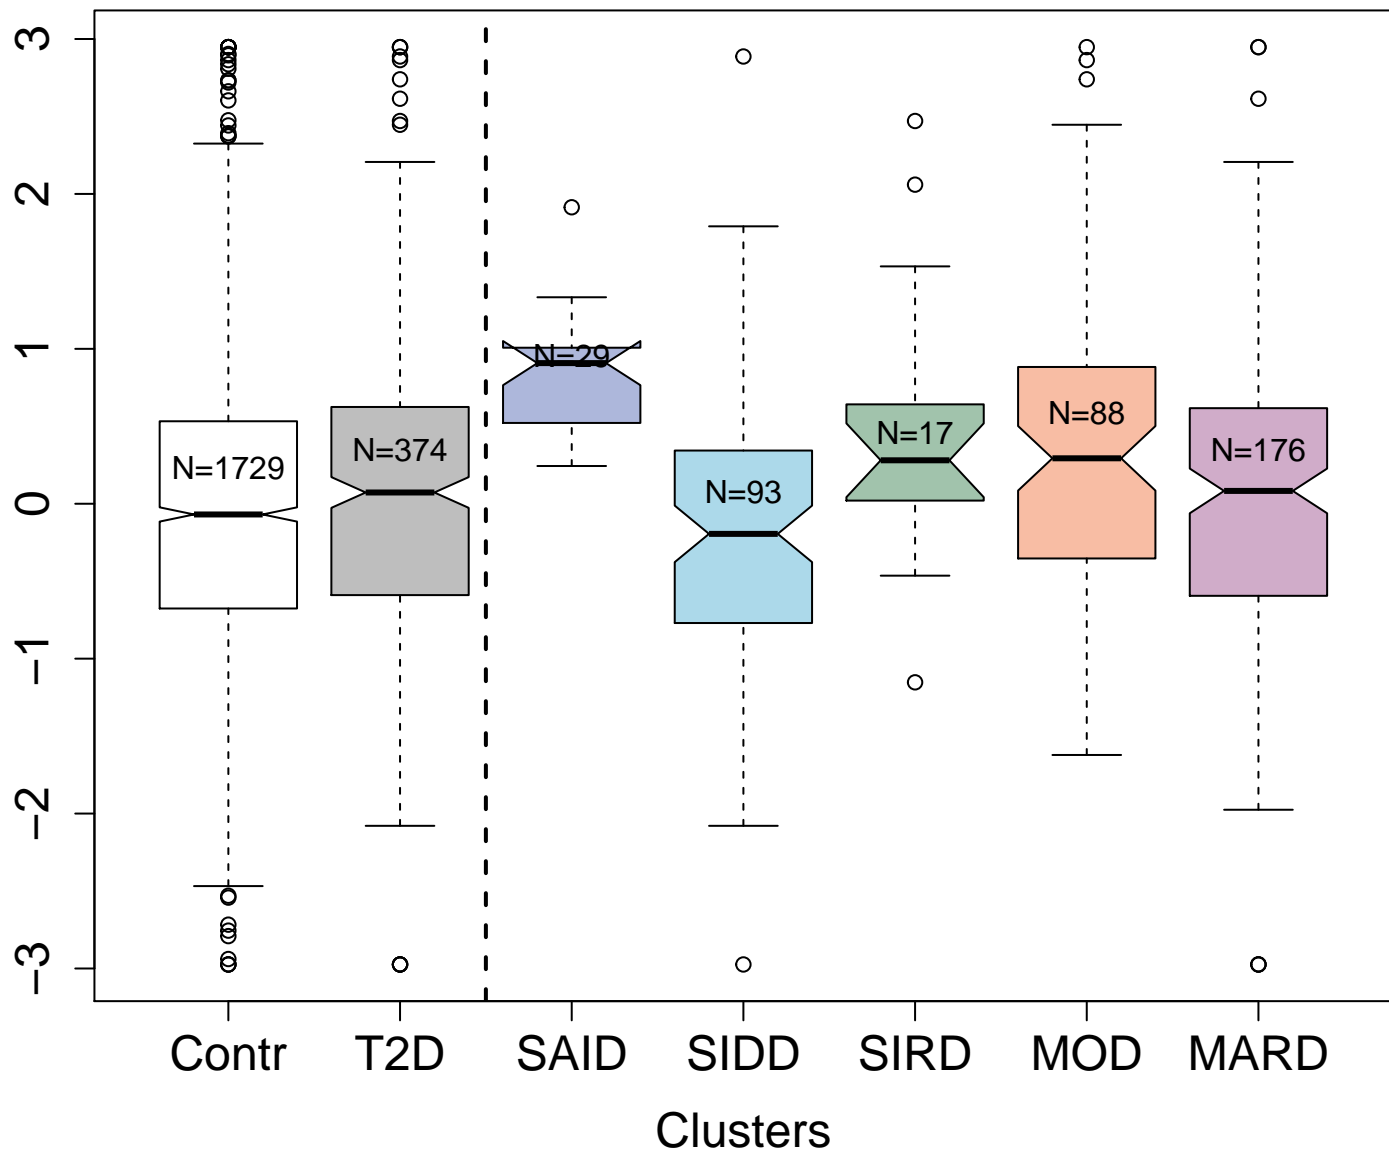

M62919 : tridecenedioate (C13:1-DC)\*

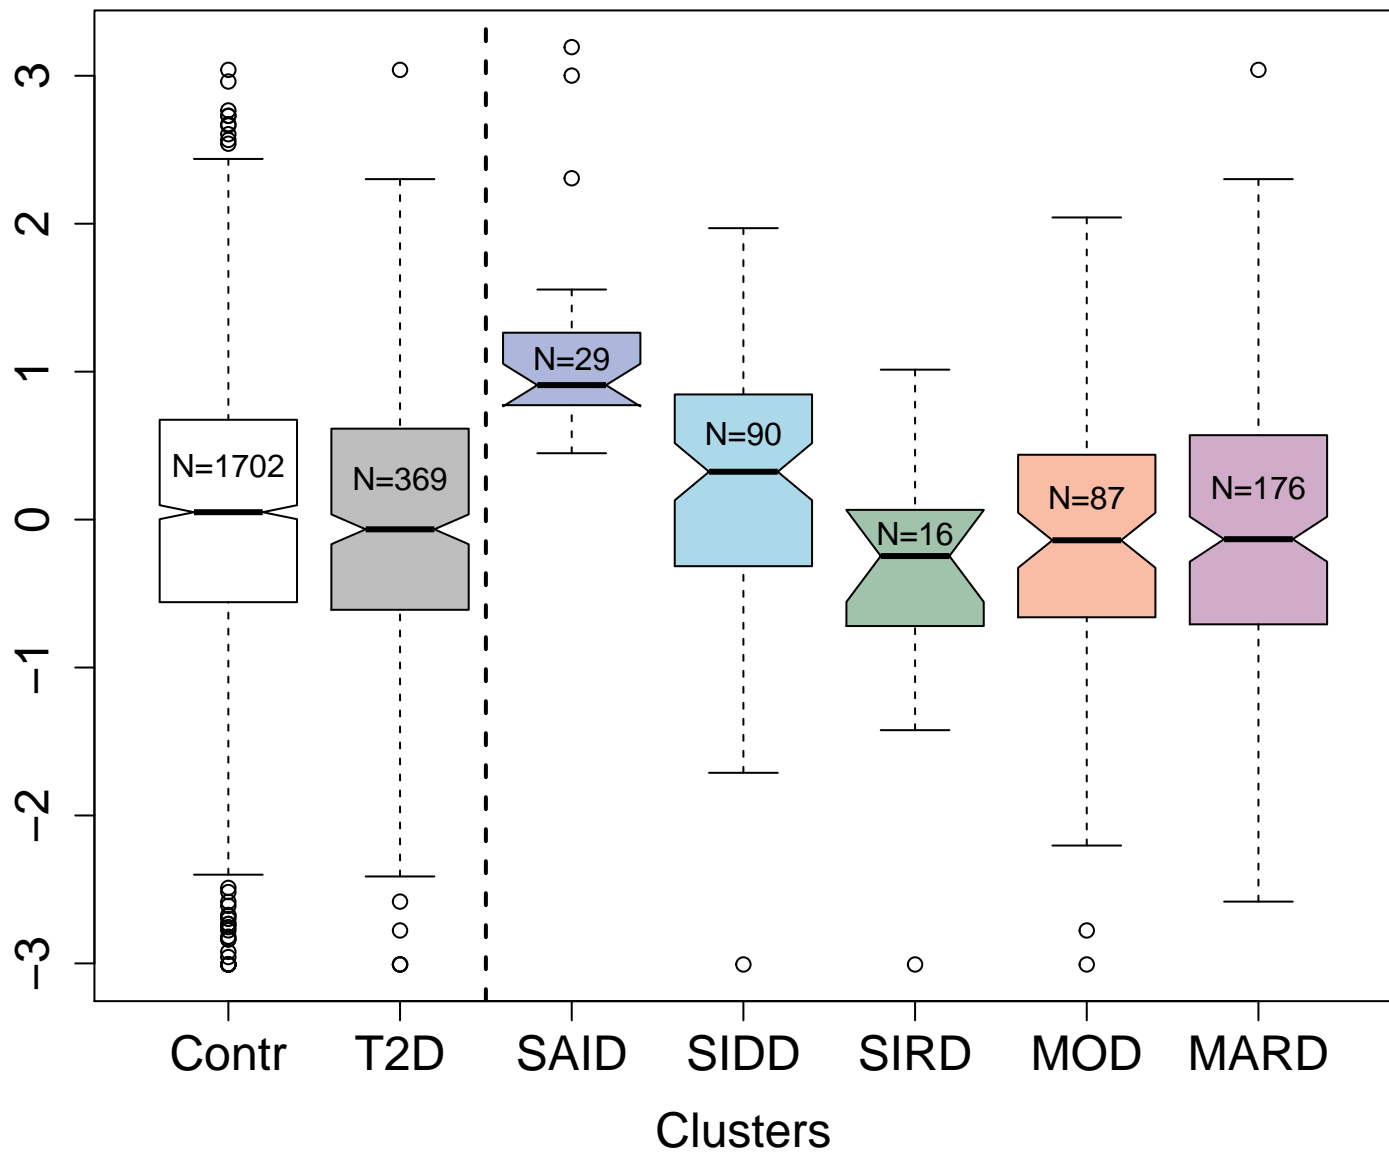

M47804 : X - 16580

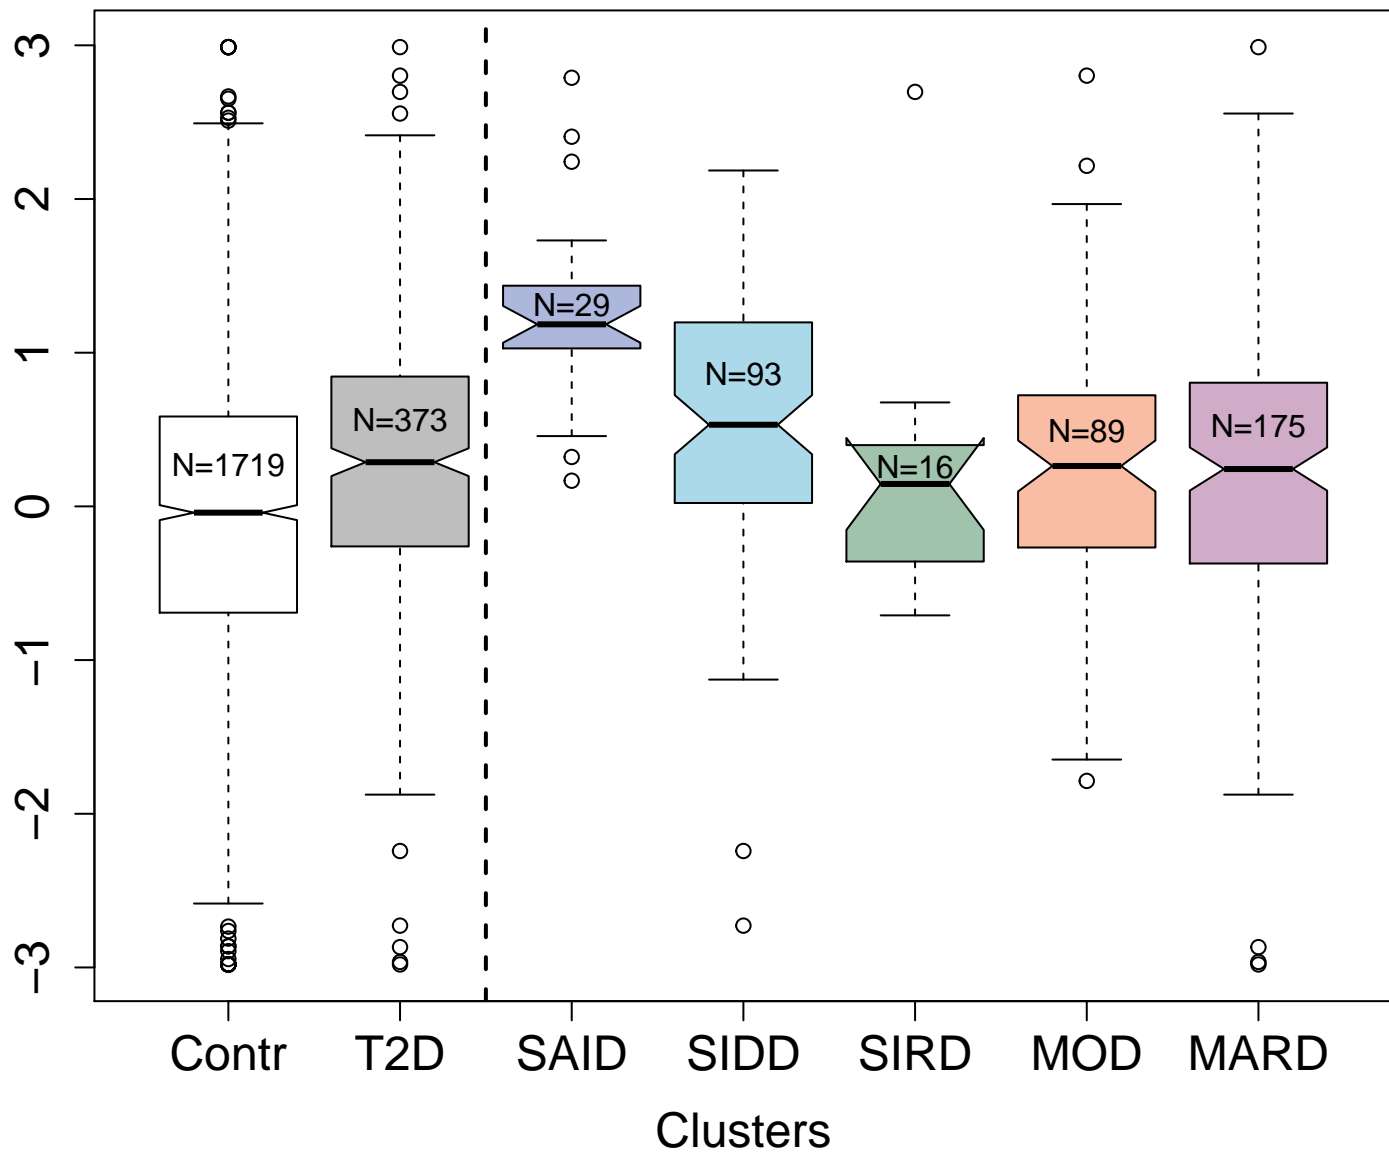



M1303 : malate

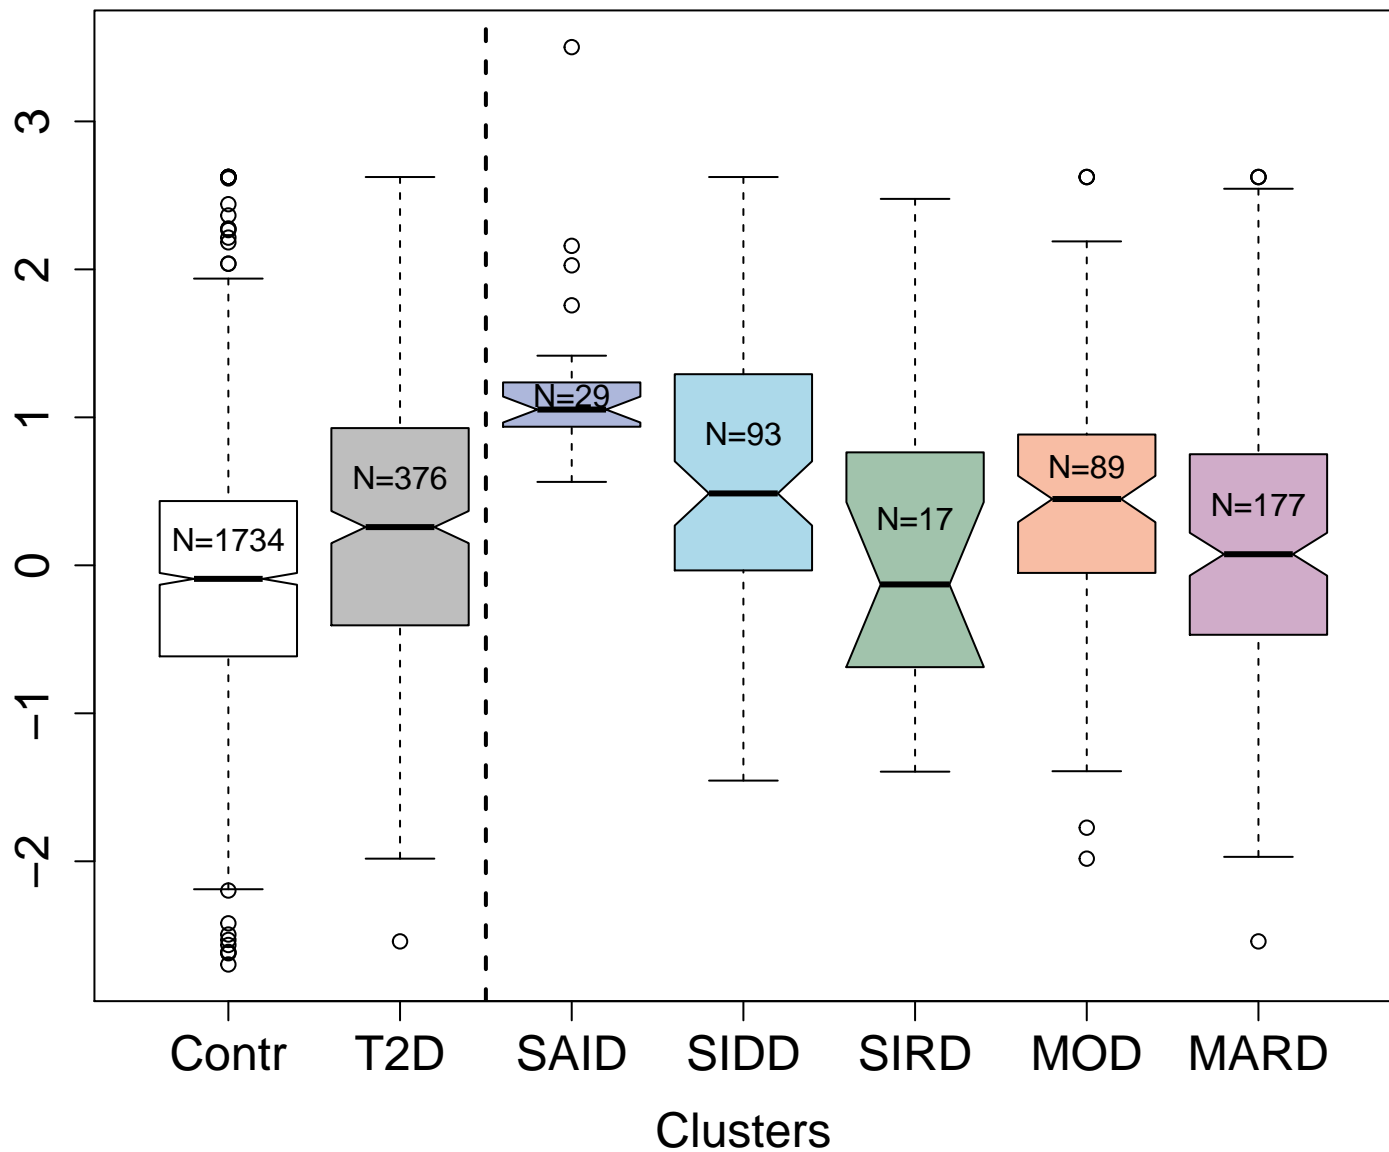

M36098 : 4-vinylphenol sulfate

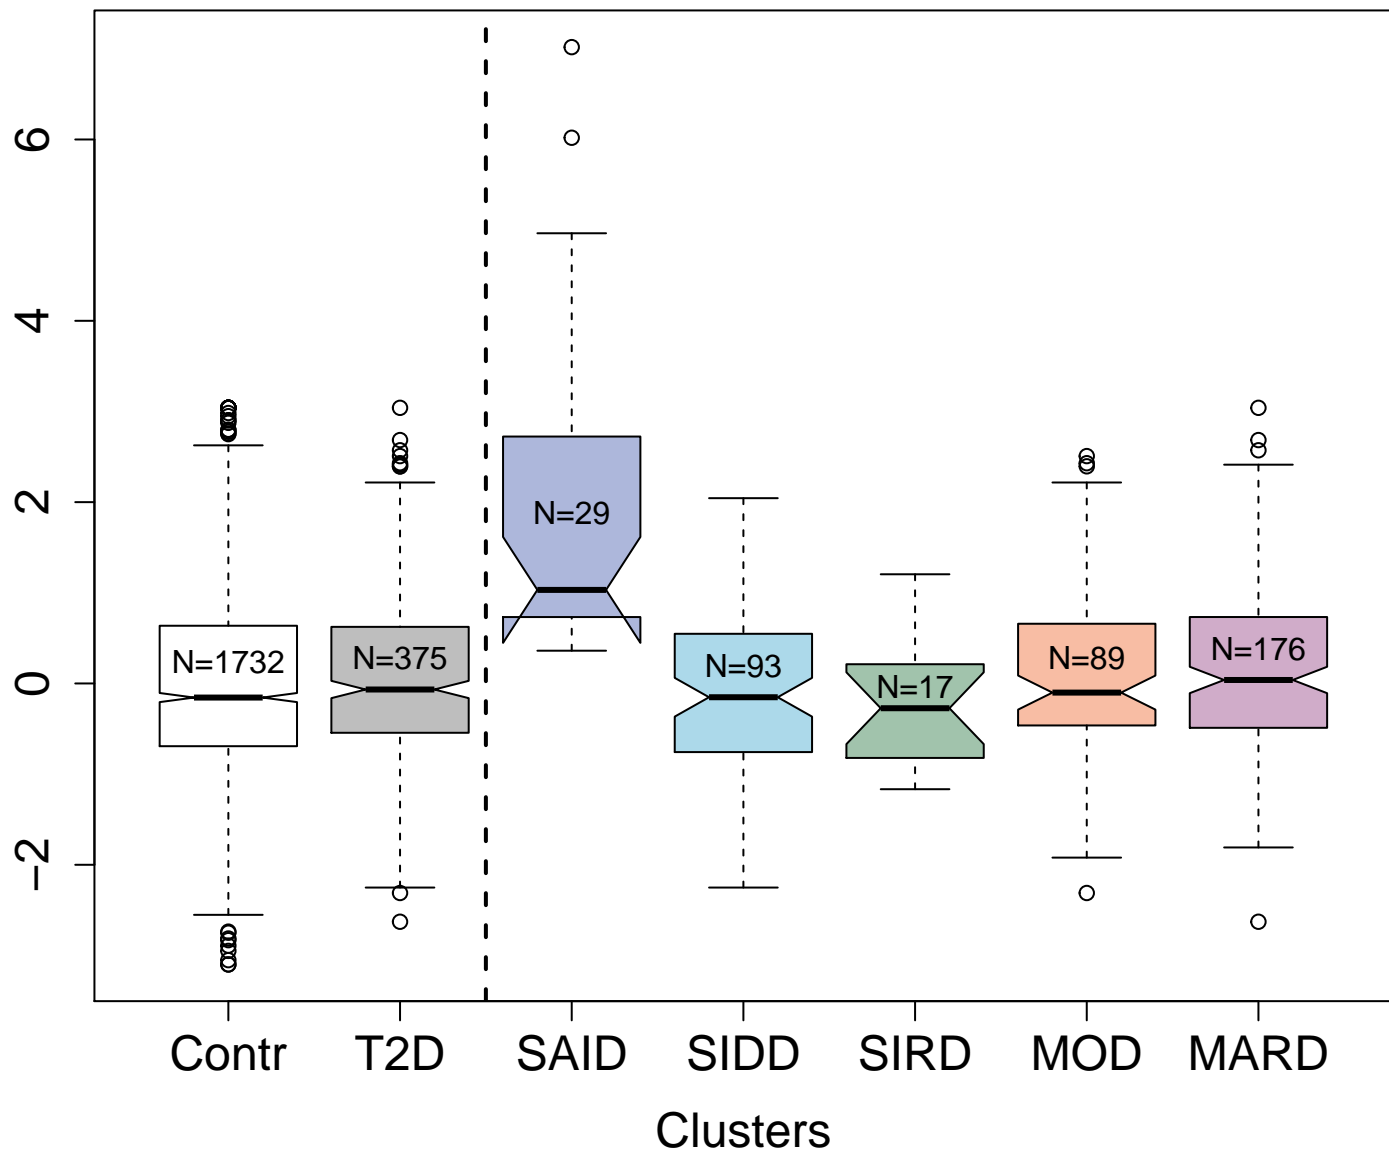

M62664 : X - 25371

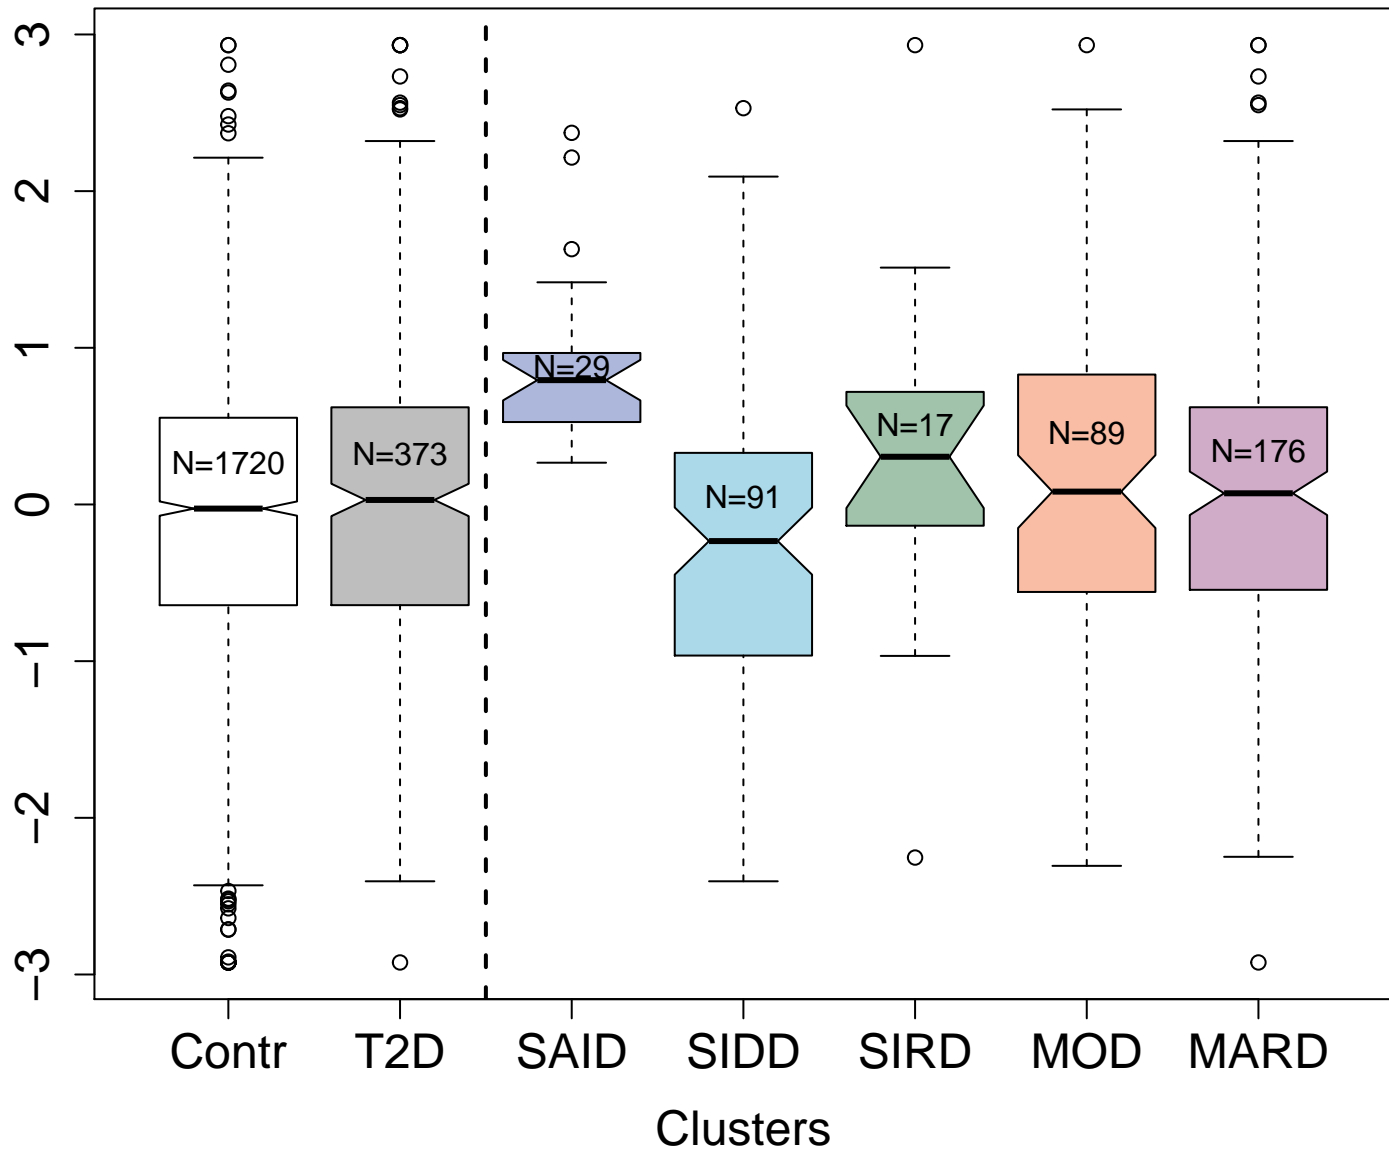

M1645 : laurate (12:0)

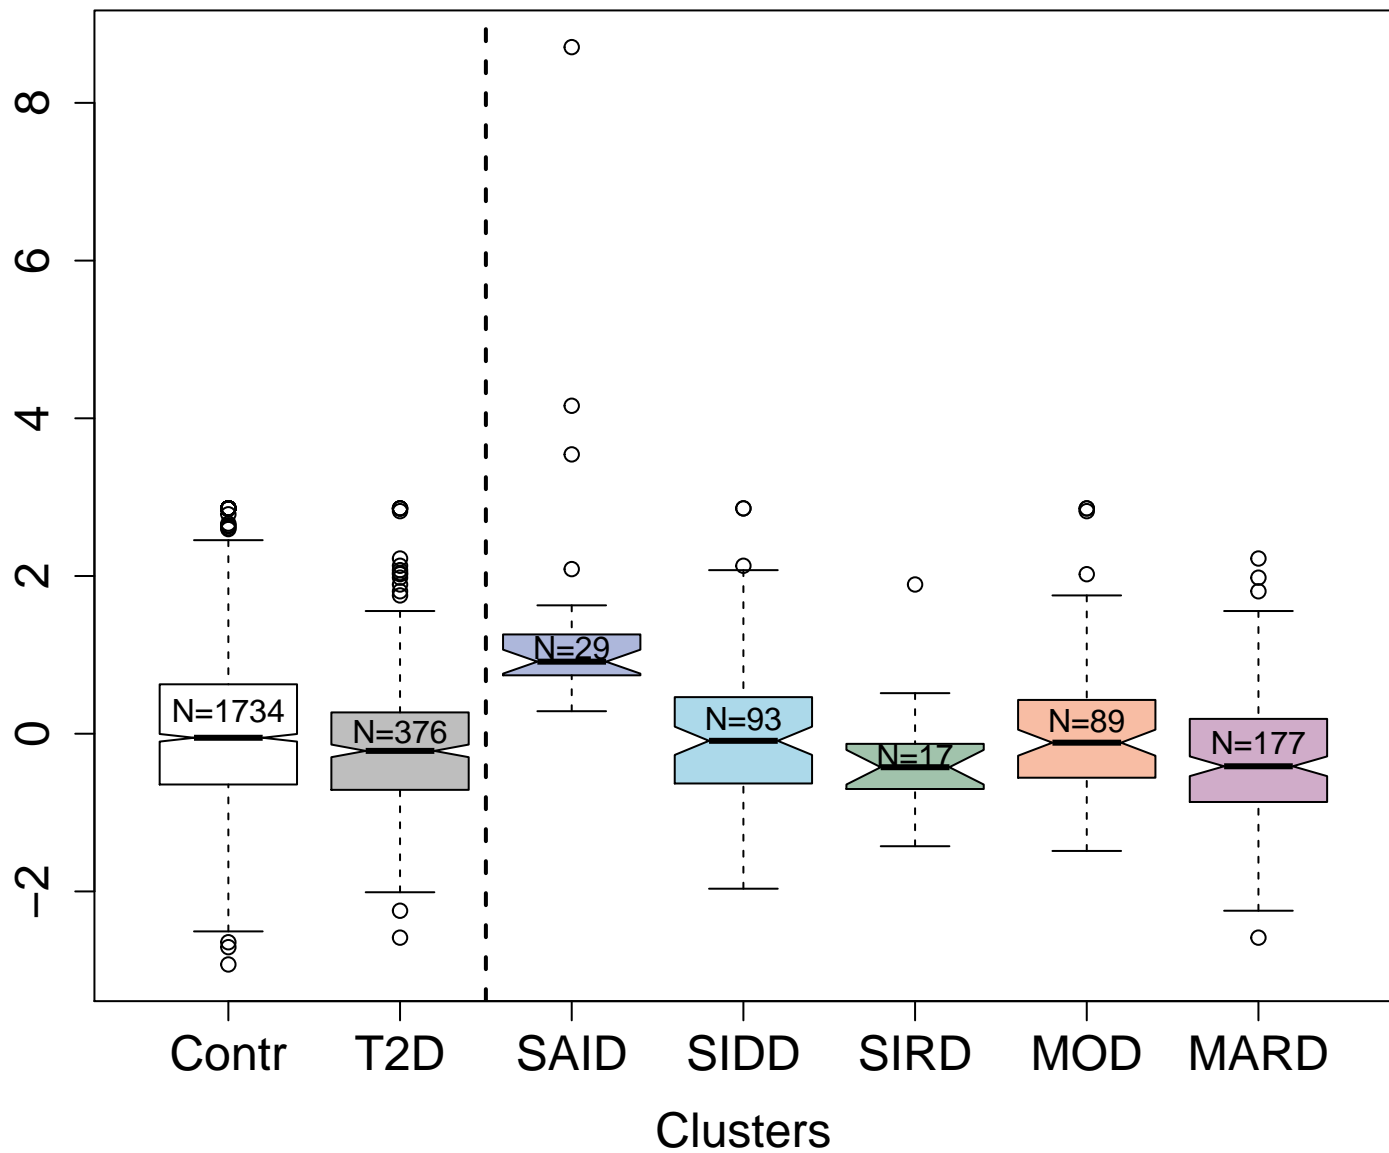

M15705 : cystathionine

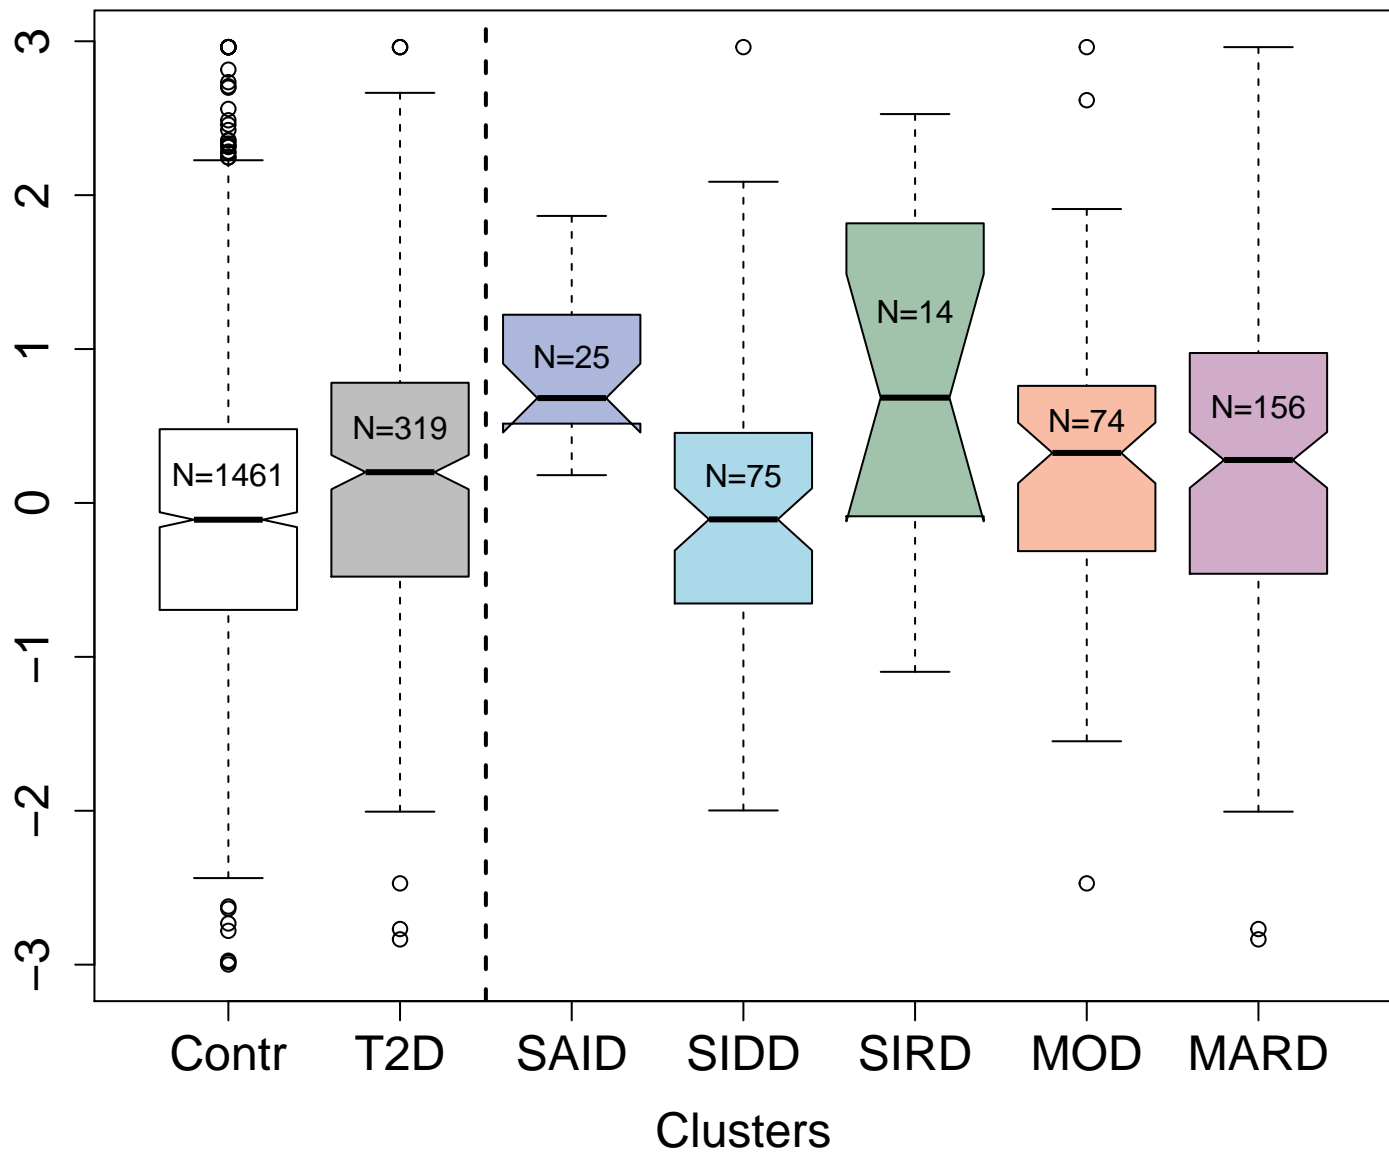

M1414 : 3-phosphoglycerate

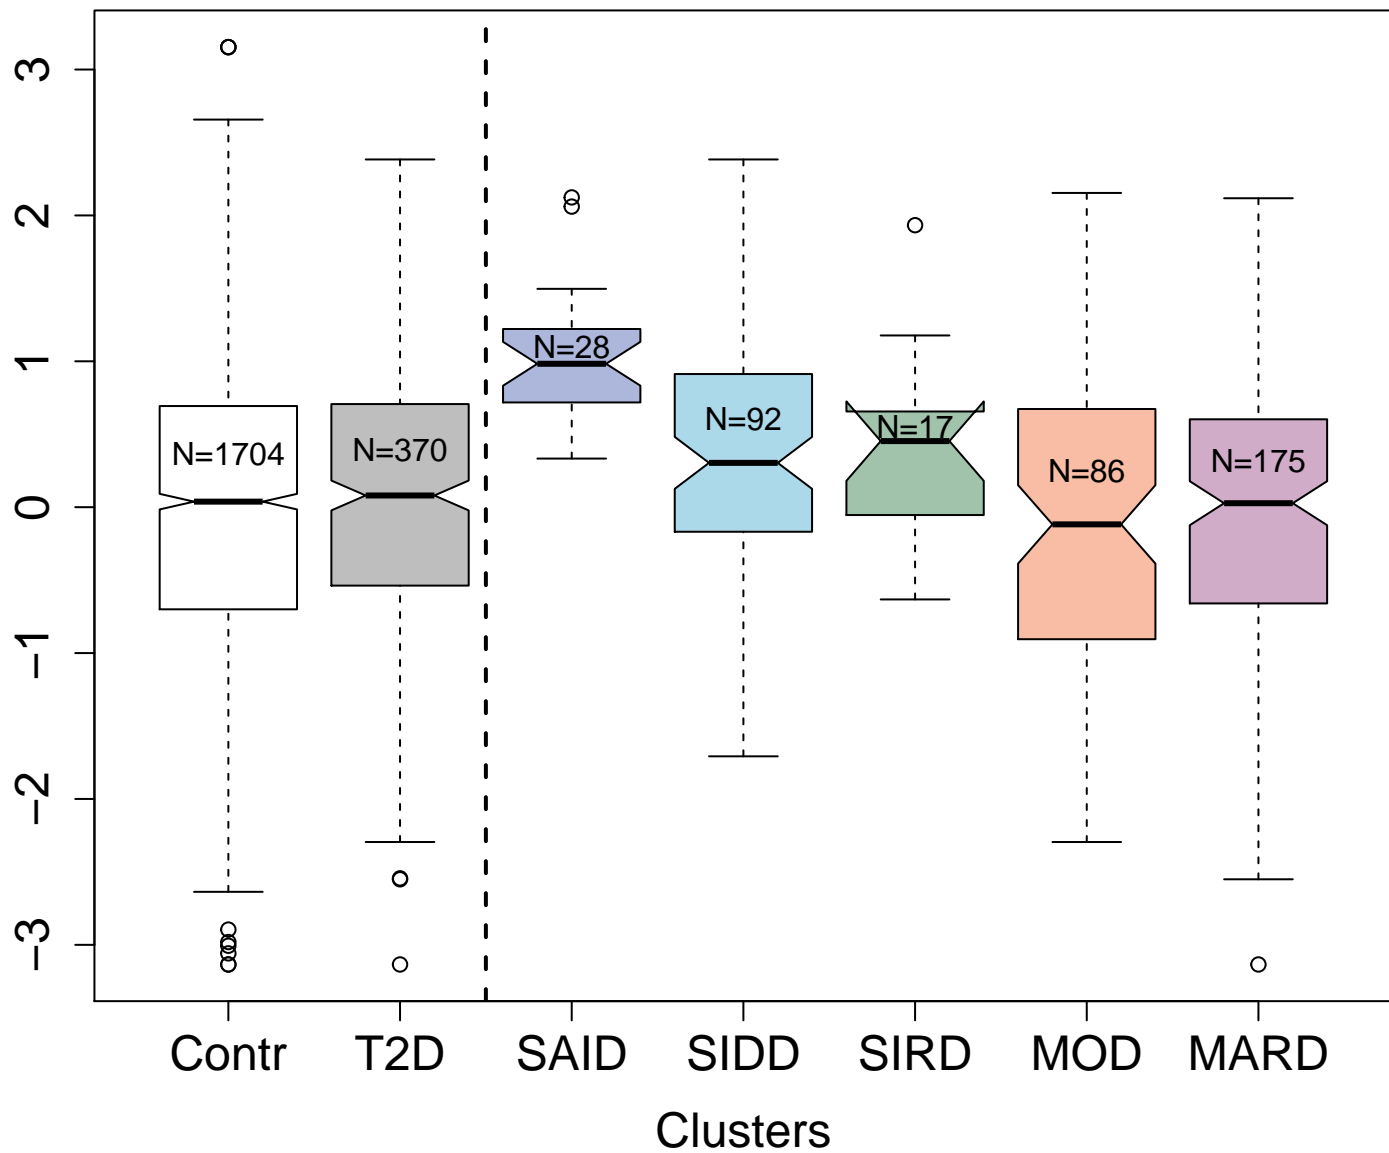

M22036 : 2-hydroxyoctanoate

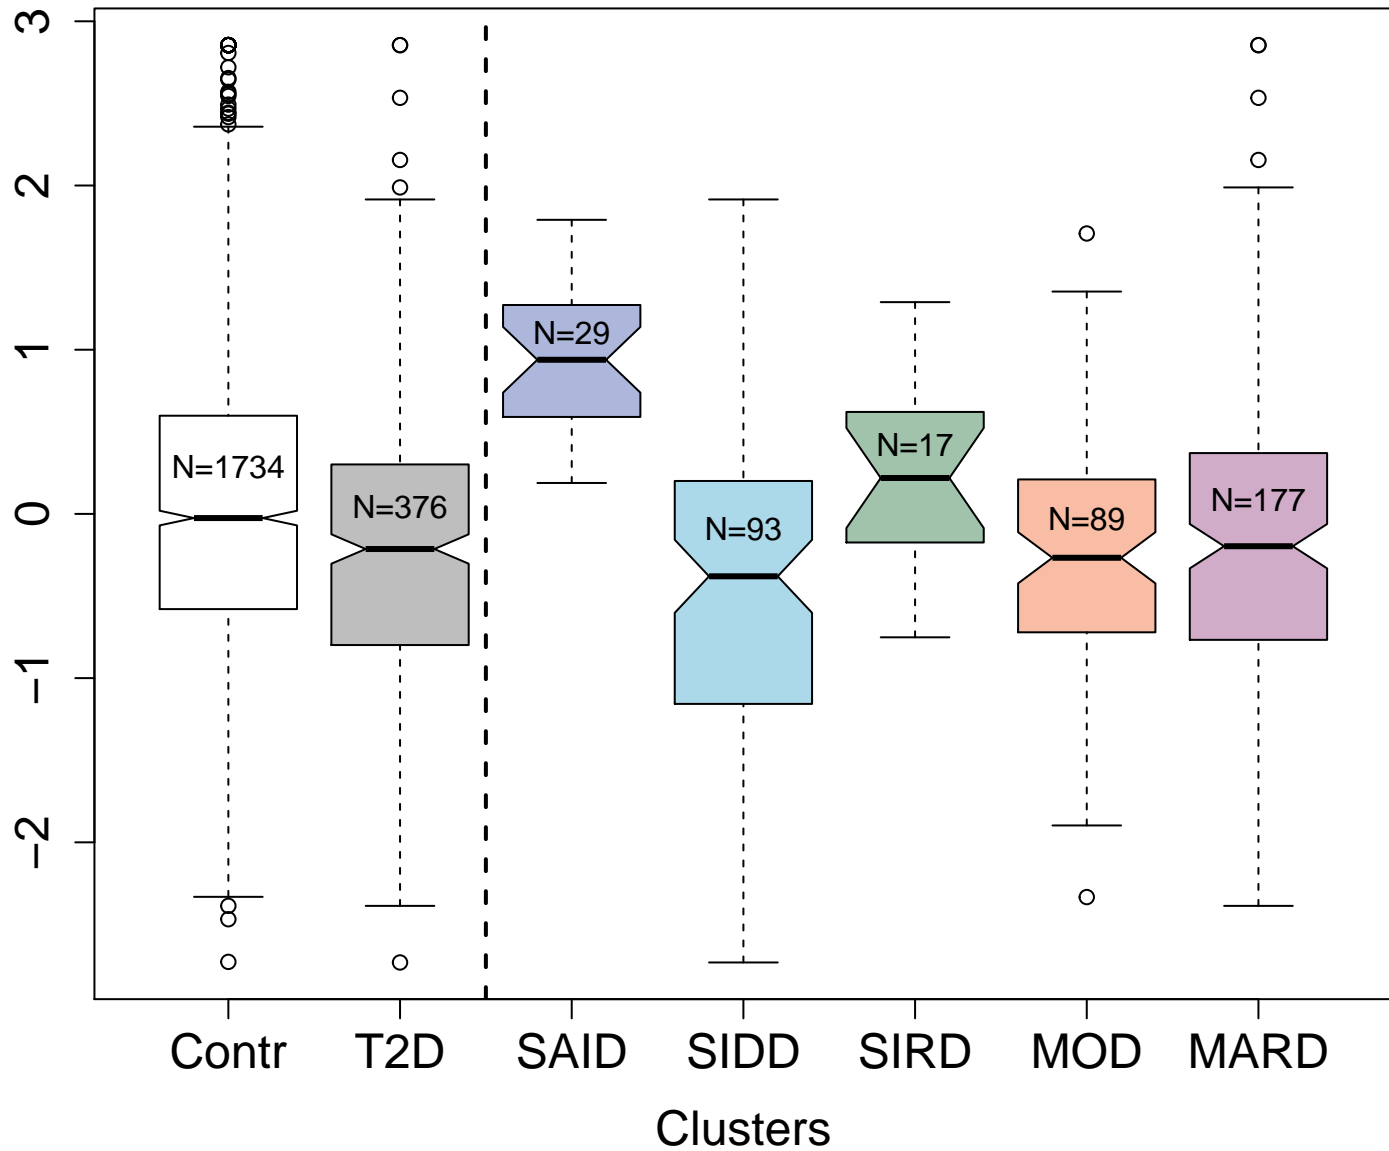

M52524 : X - 24328

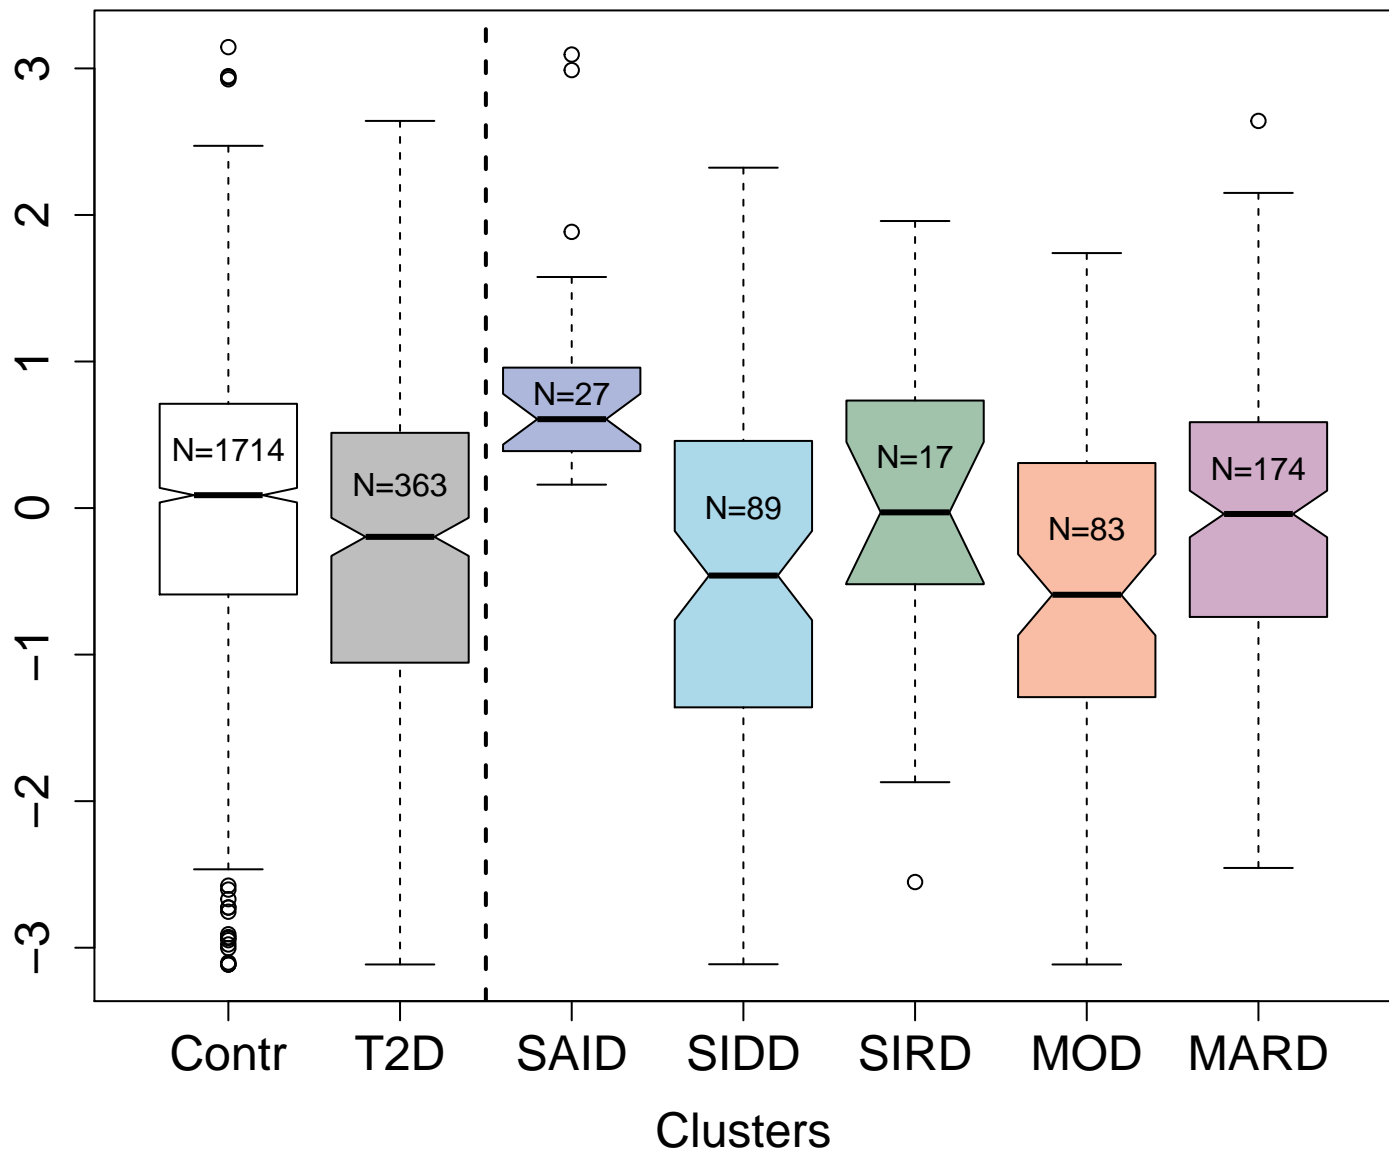



M35137 : N2,N2-dimethylguanosine

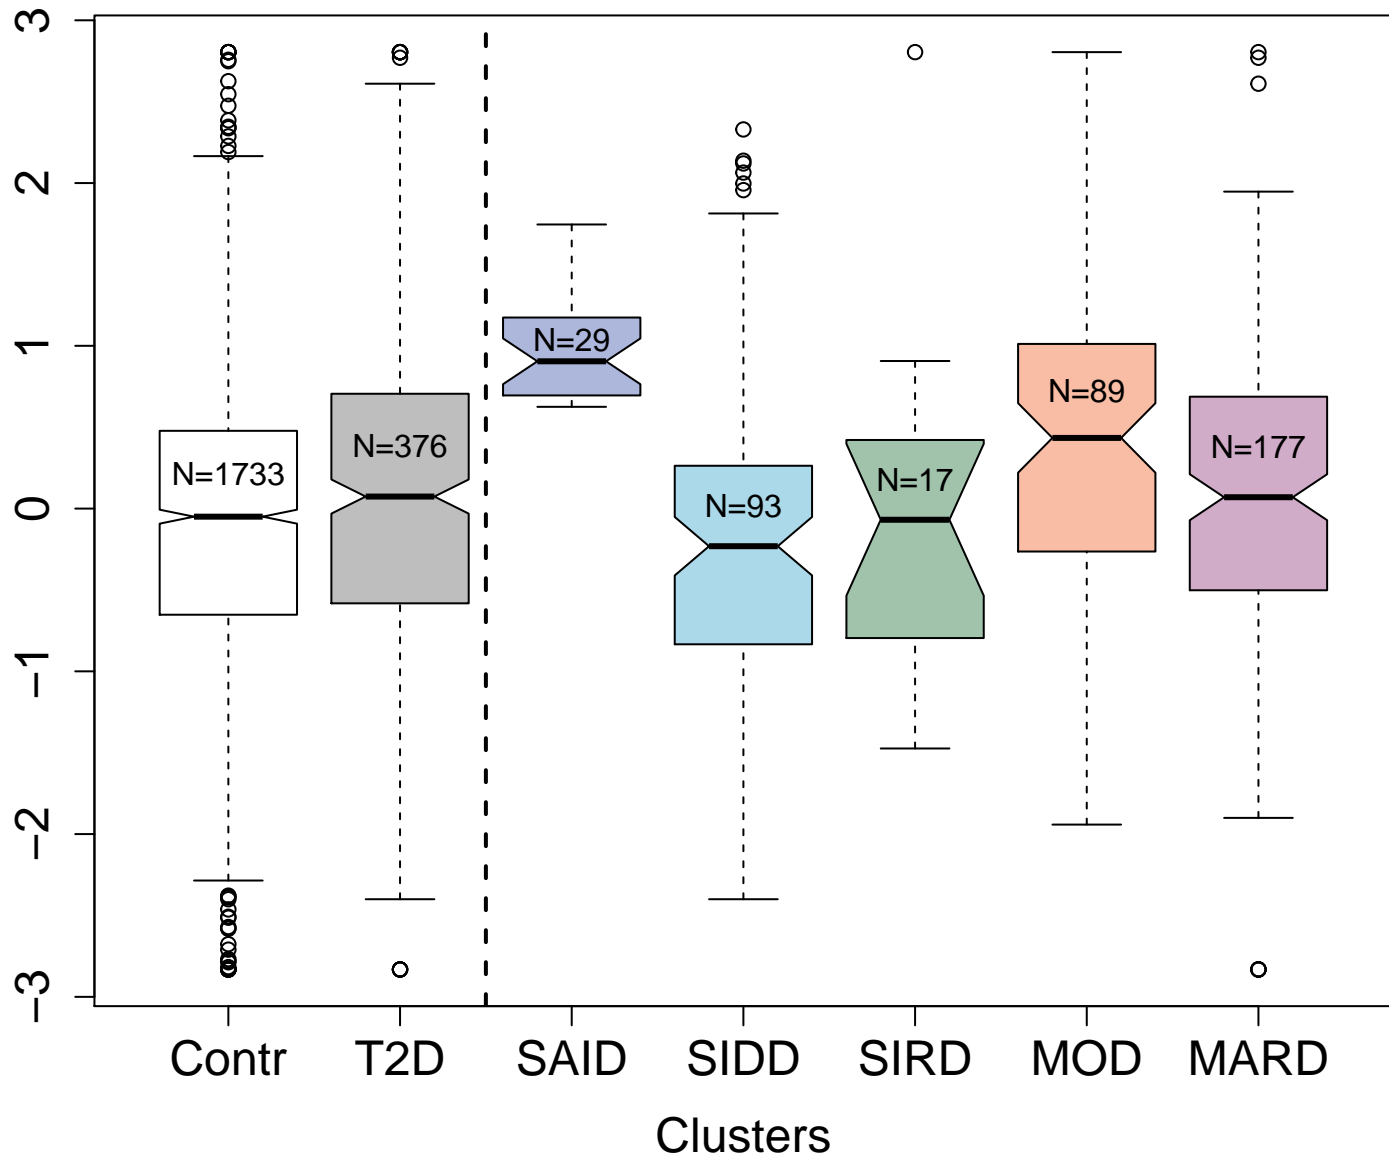

M57482 : sphingomyelin (d18:2/23:1)\*

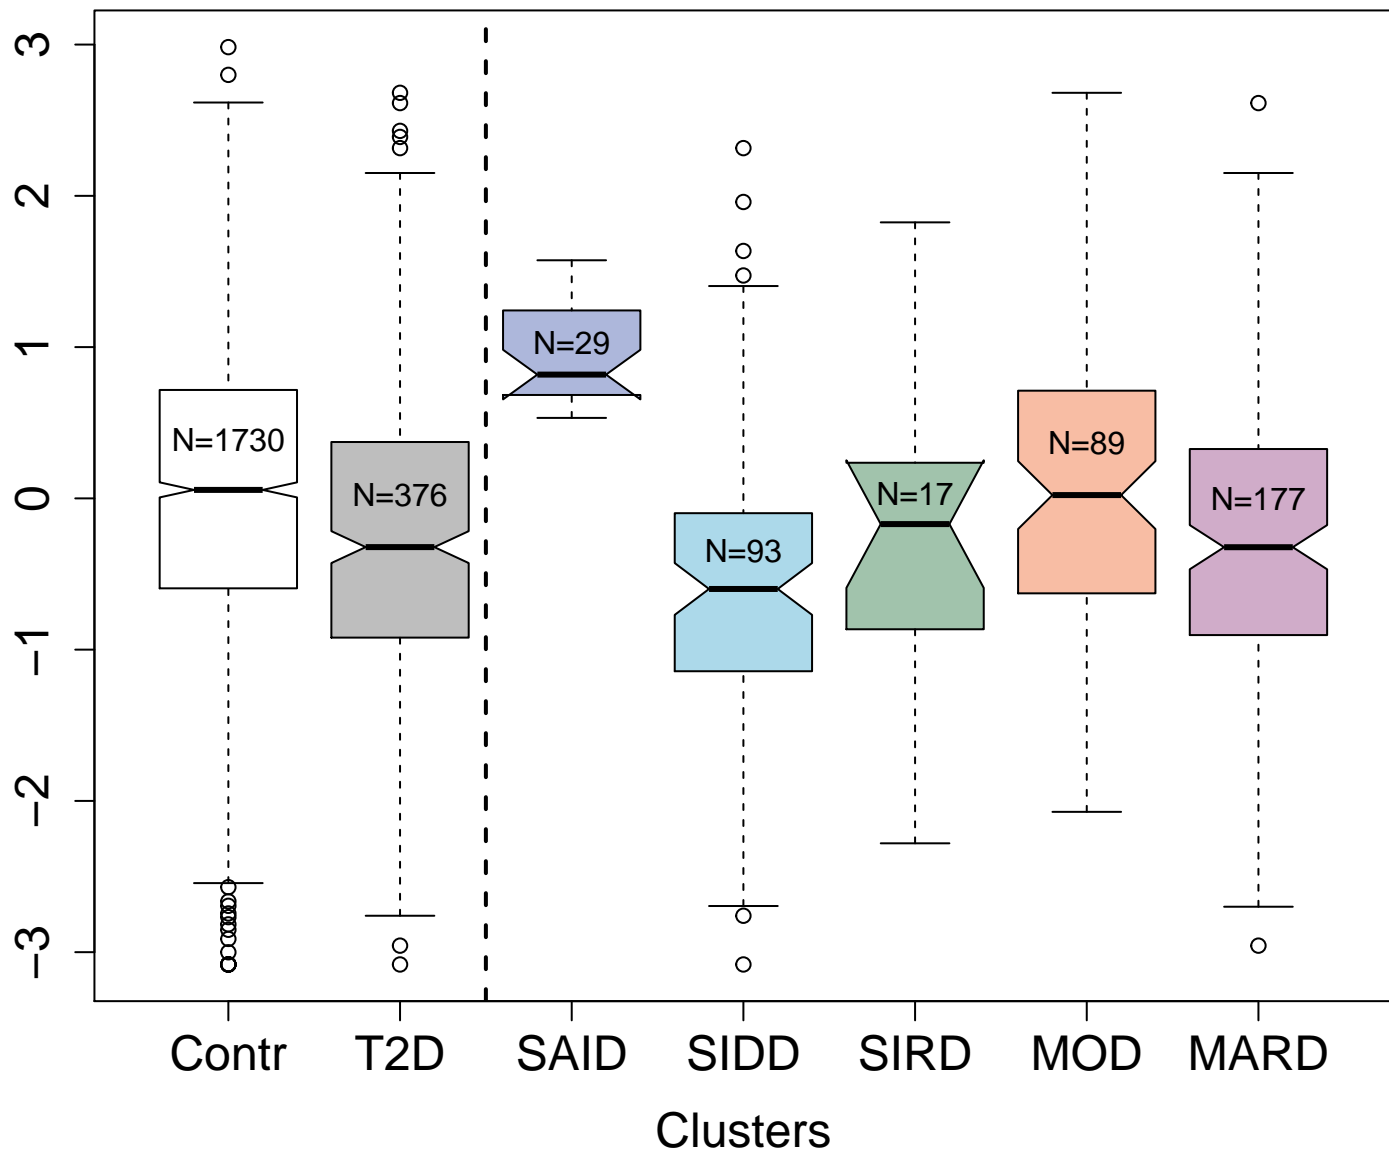

M32342 : adenosine 5'-monophosphate (AMP)

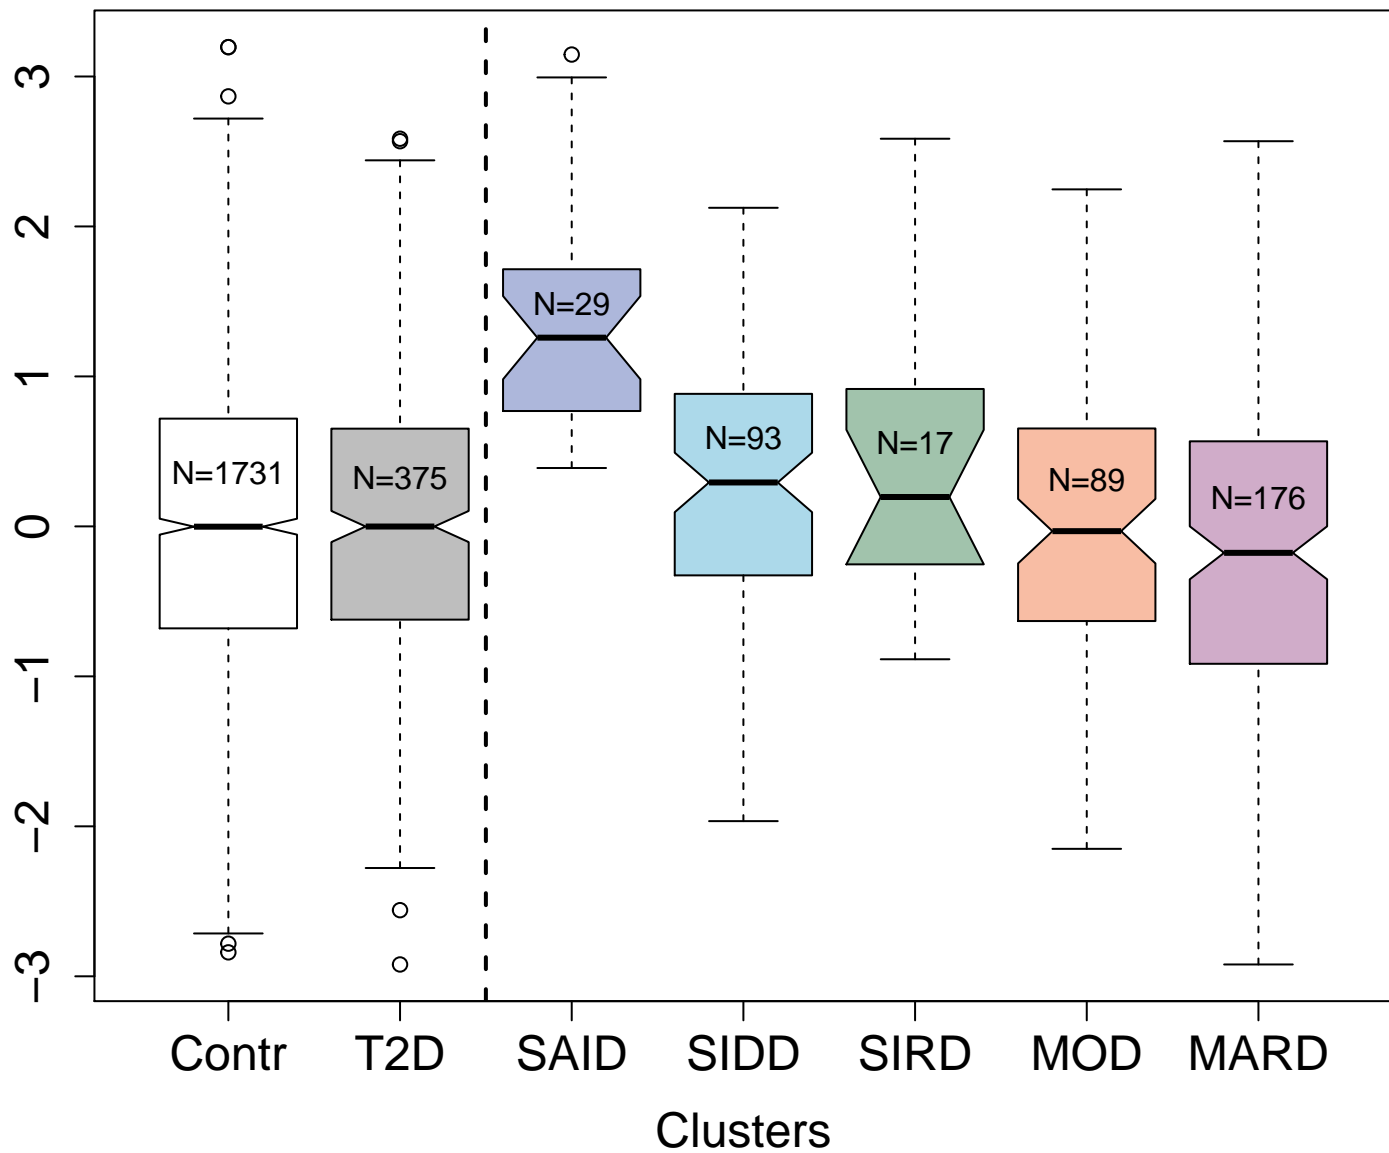

M22053 : 3-hydroxydecanoate

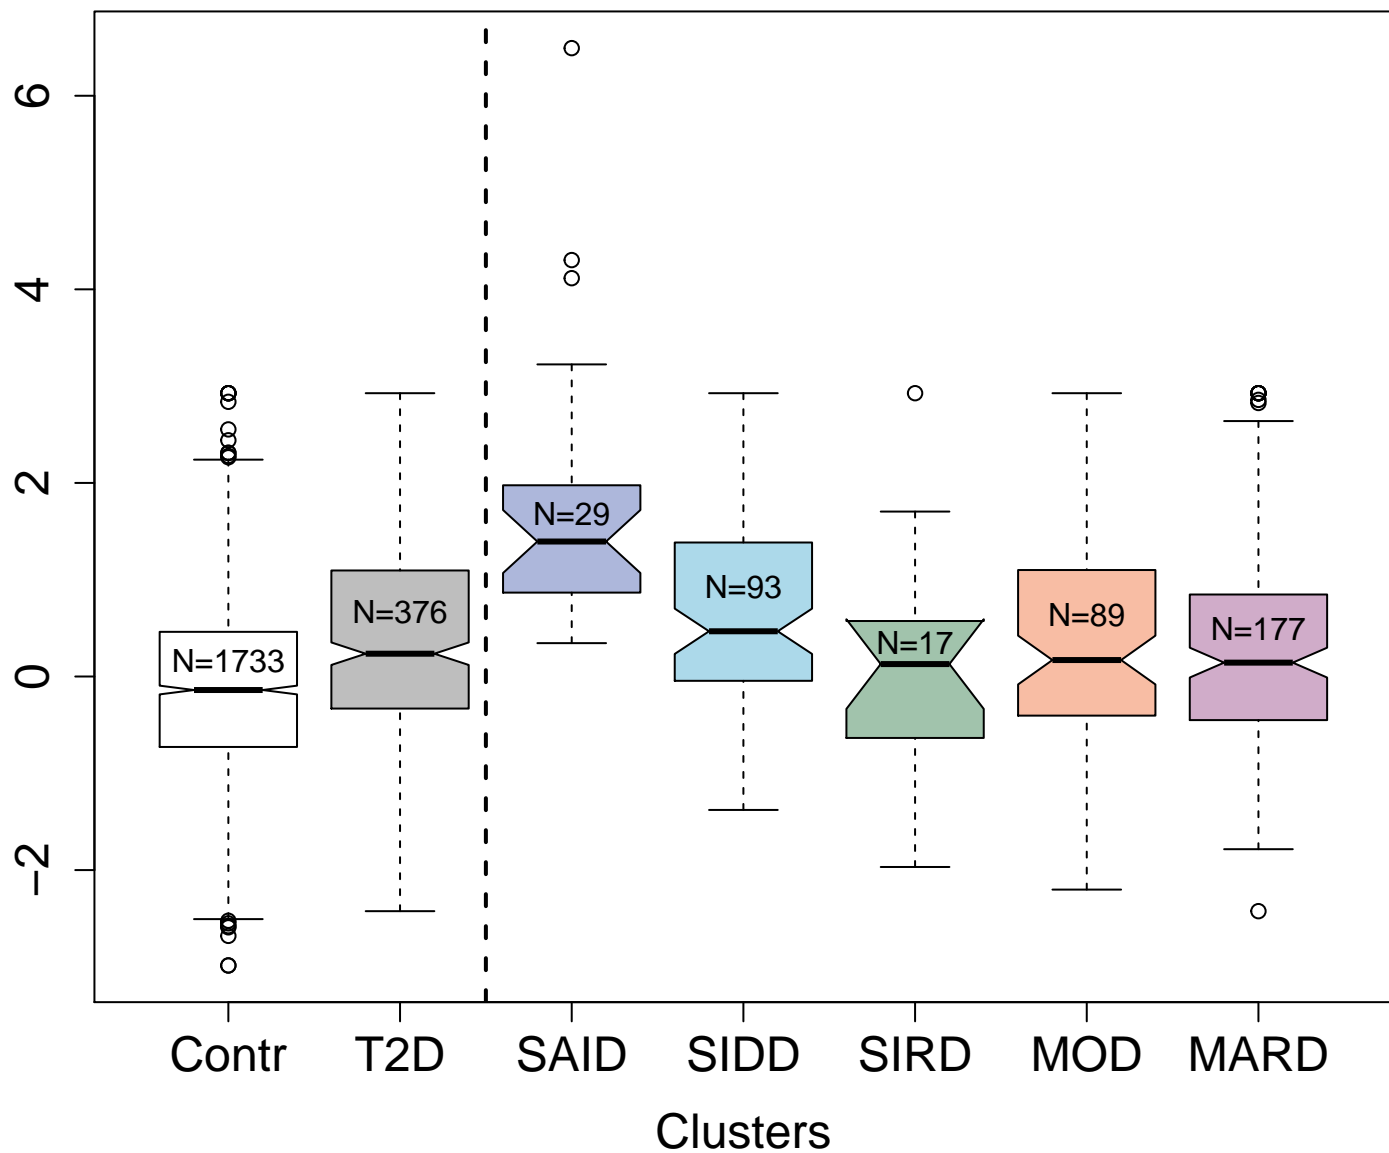

M514 : cytidine

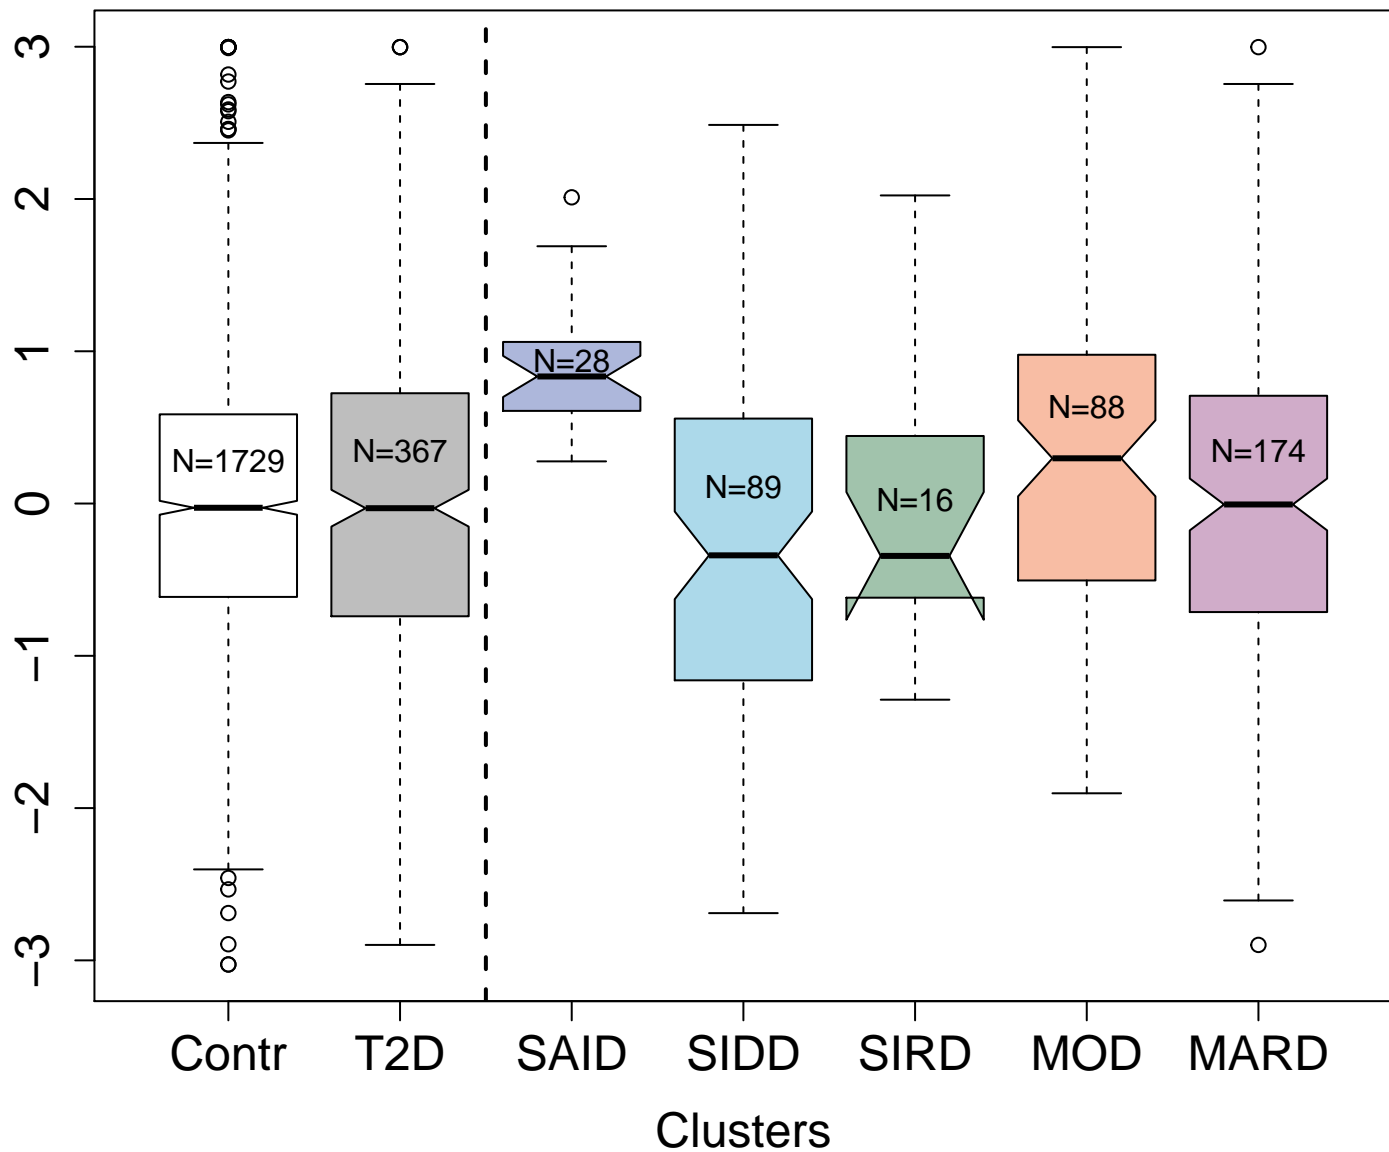

M40499 : 4-hydroxyglutamate

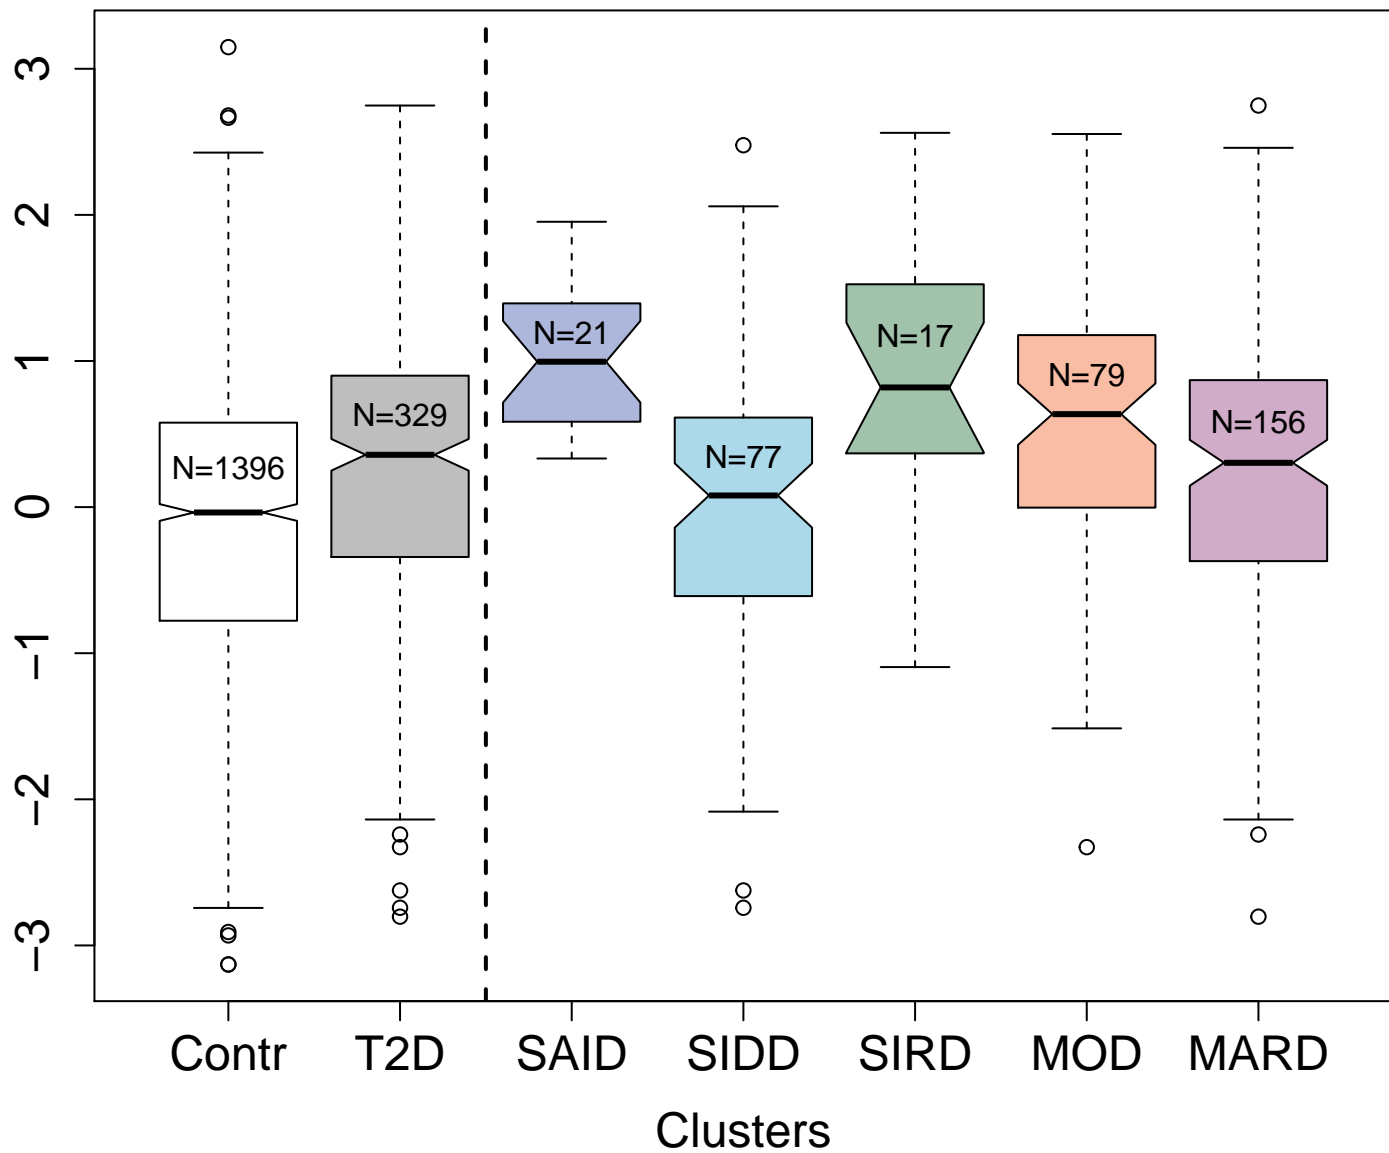

M36713 : N6-carboxymethyllysine

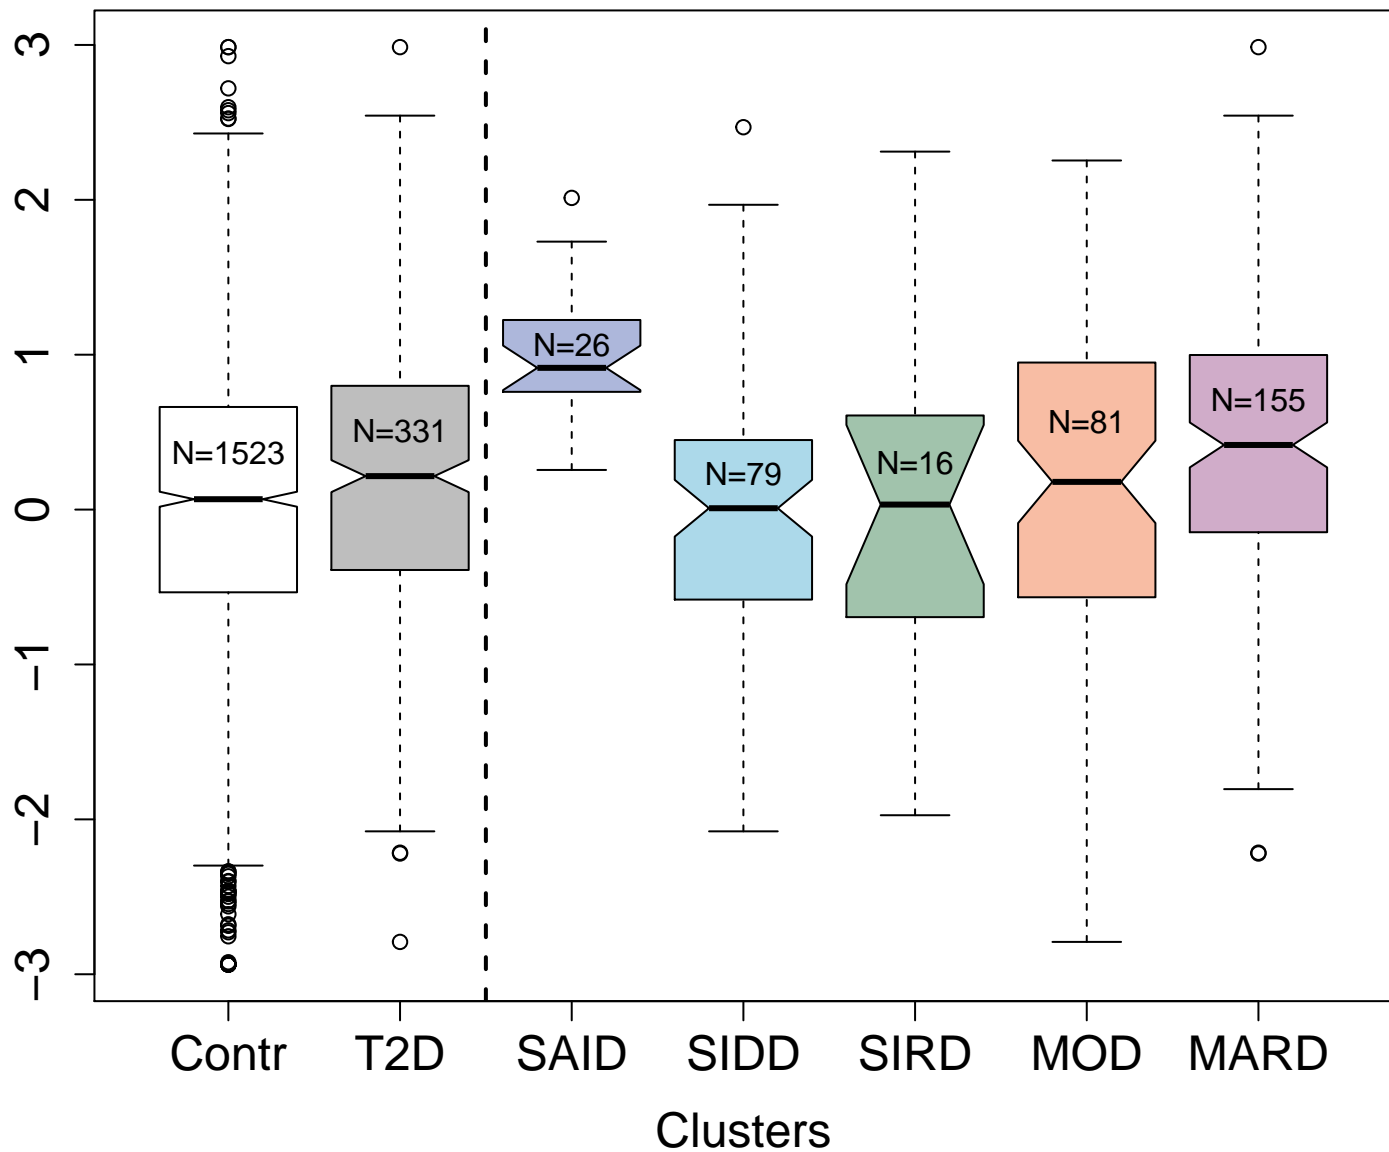

M52614 : 1-(1-enyl-stearoyl)-2-oleoyl-GPE (P-18:0/18:1)

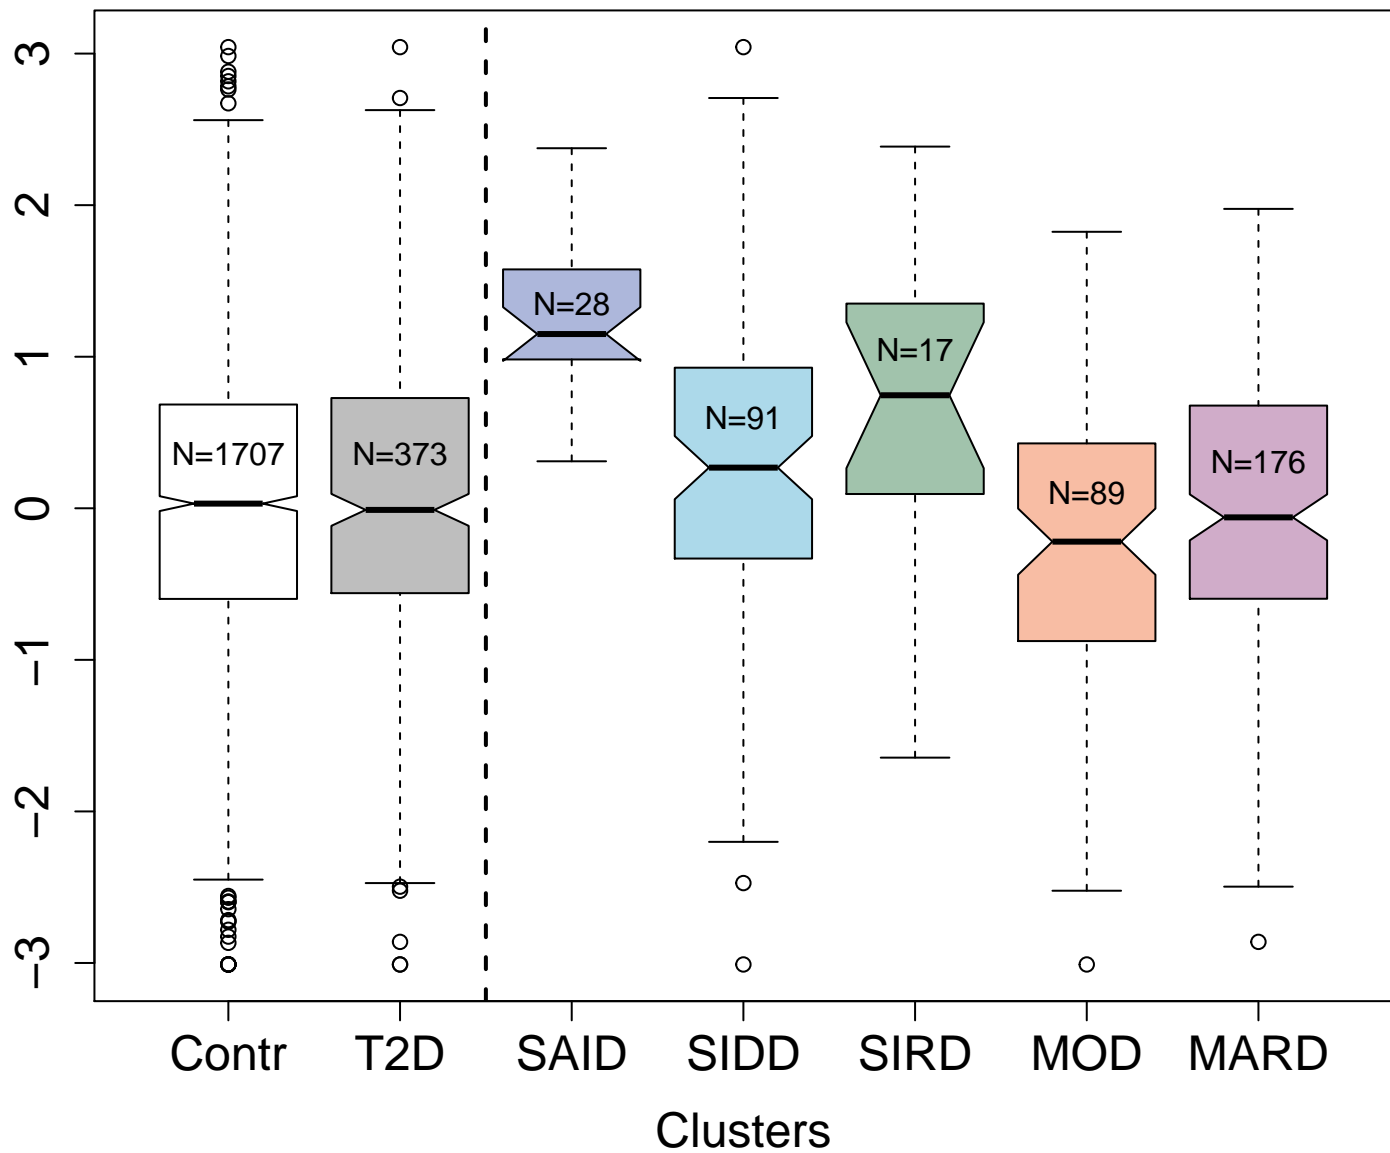



M41494 : alliin

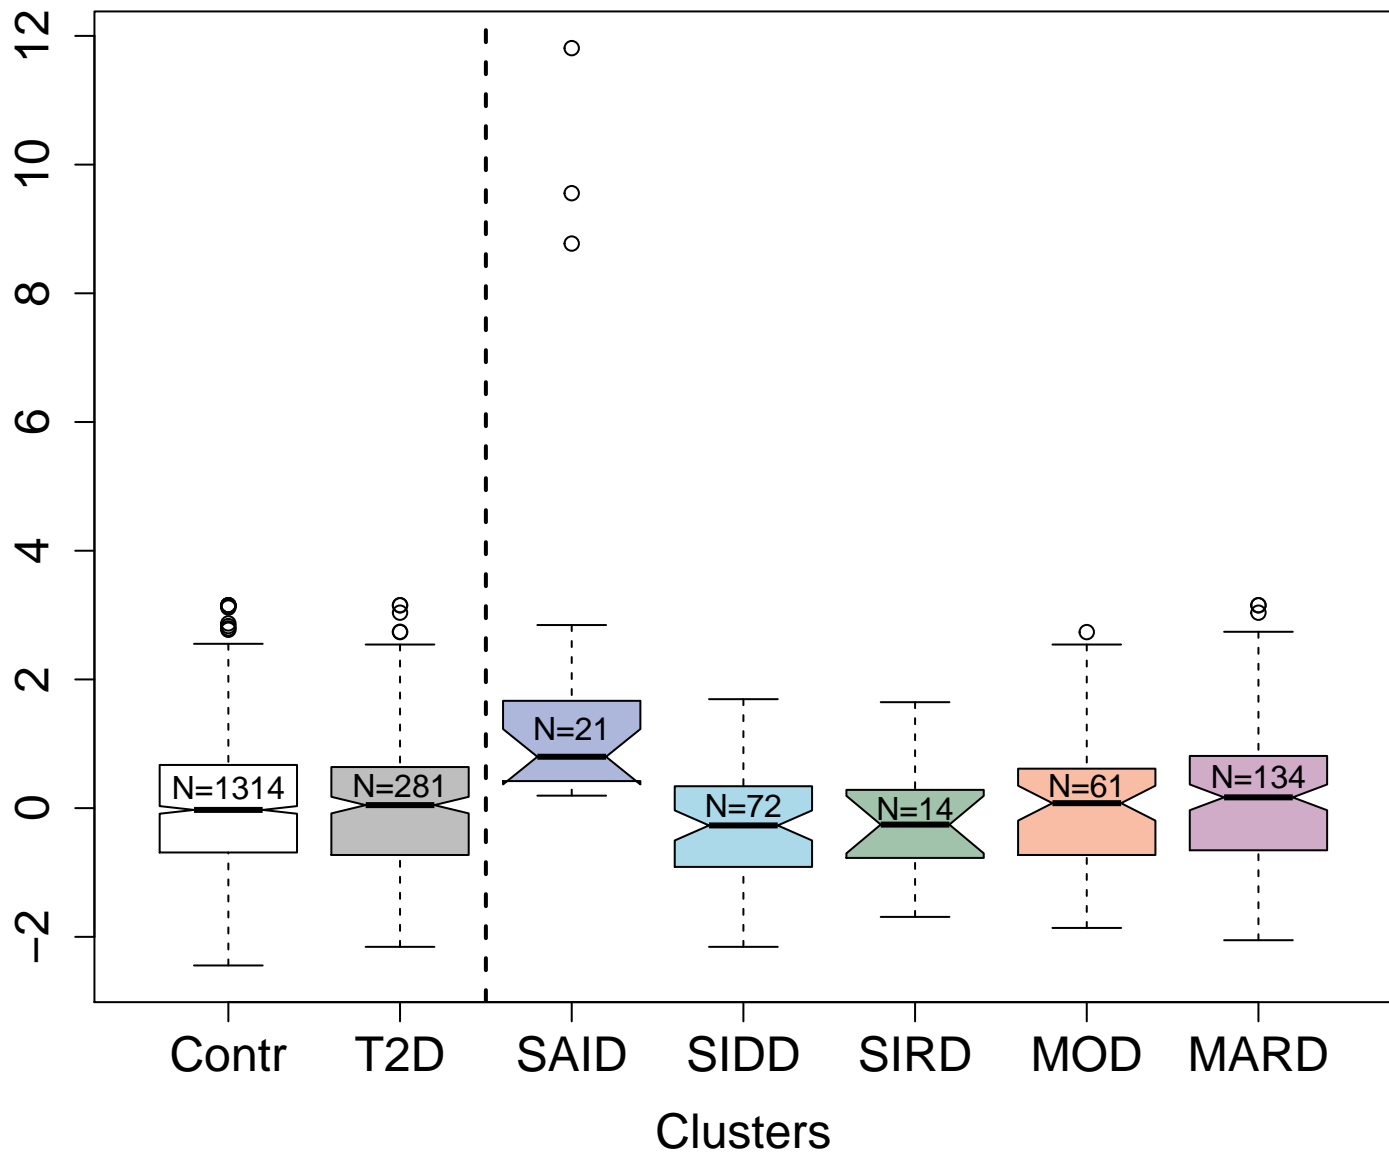

M52909 : X - 24588

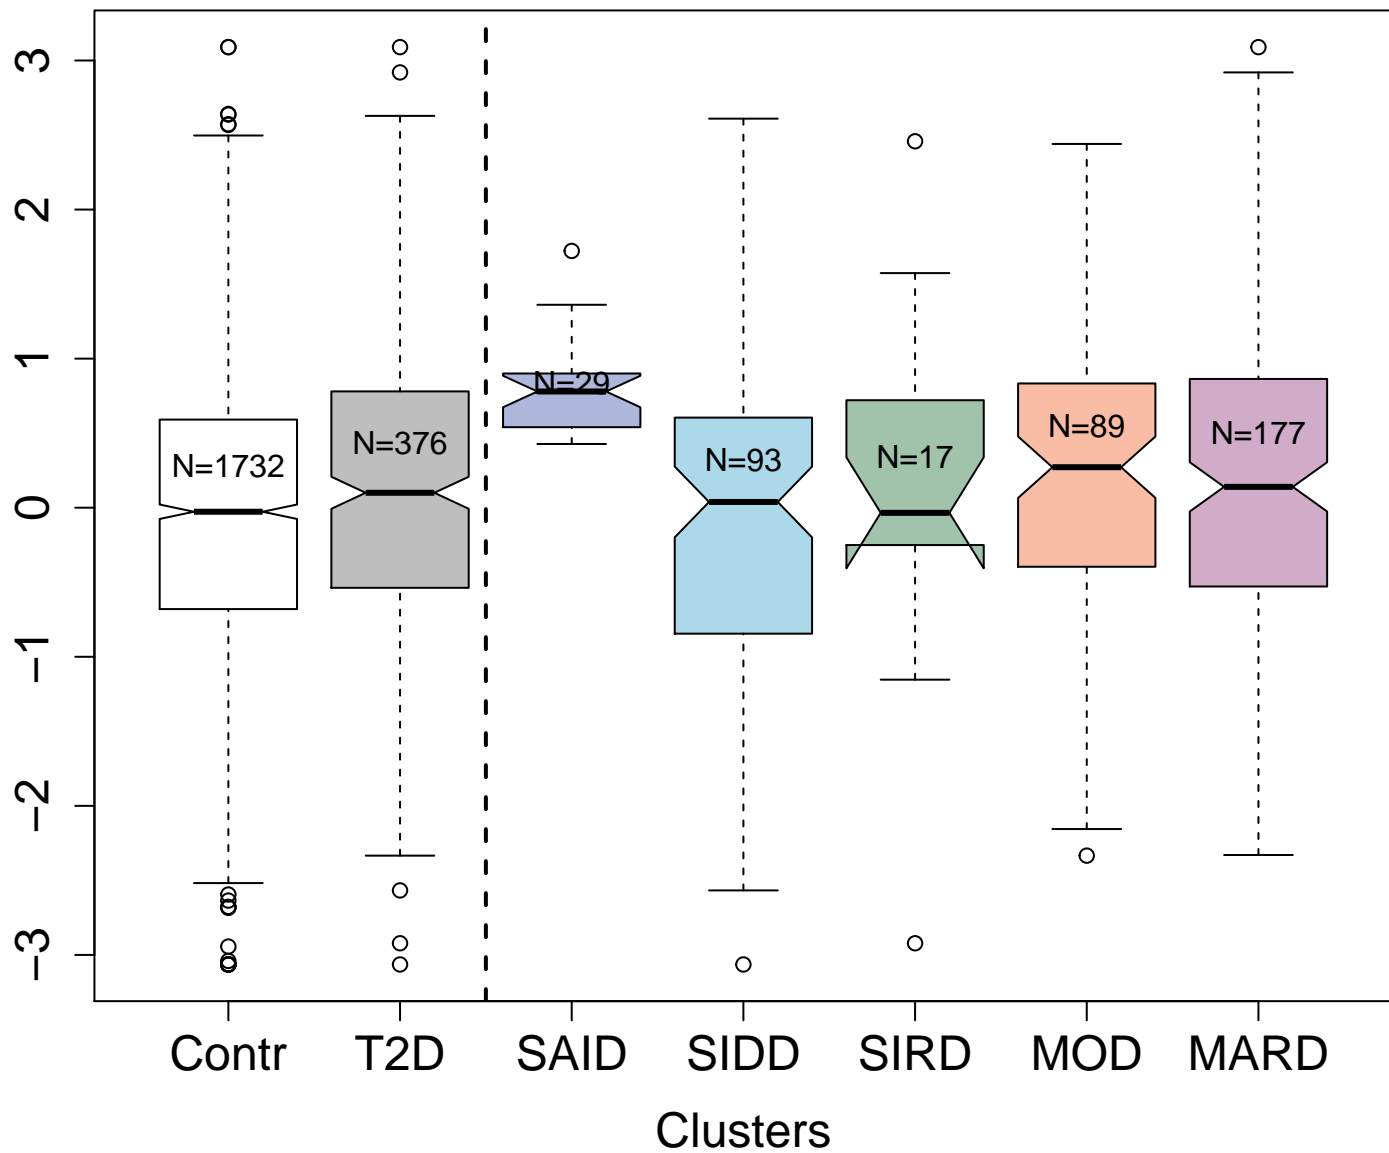

M32415 : docosadienoate (22:2n6)

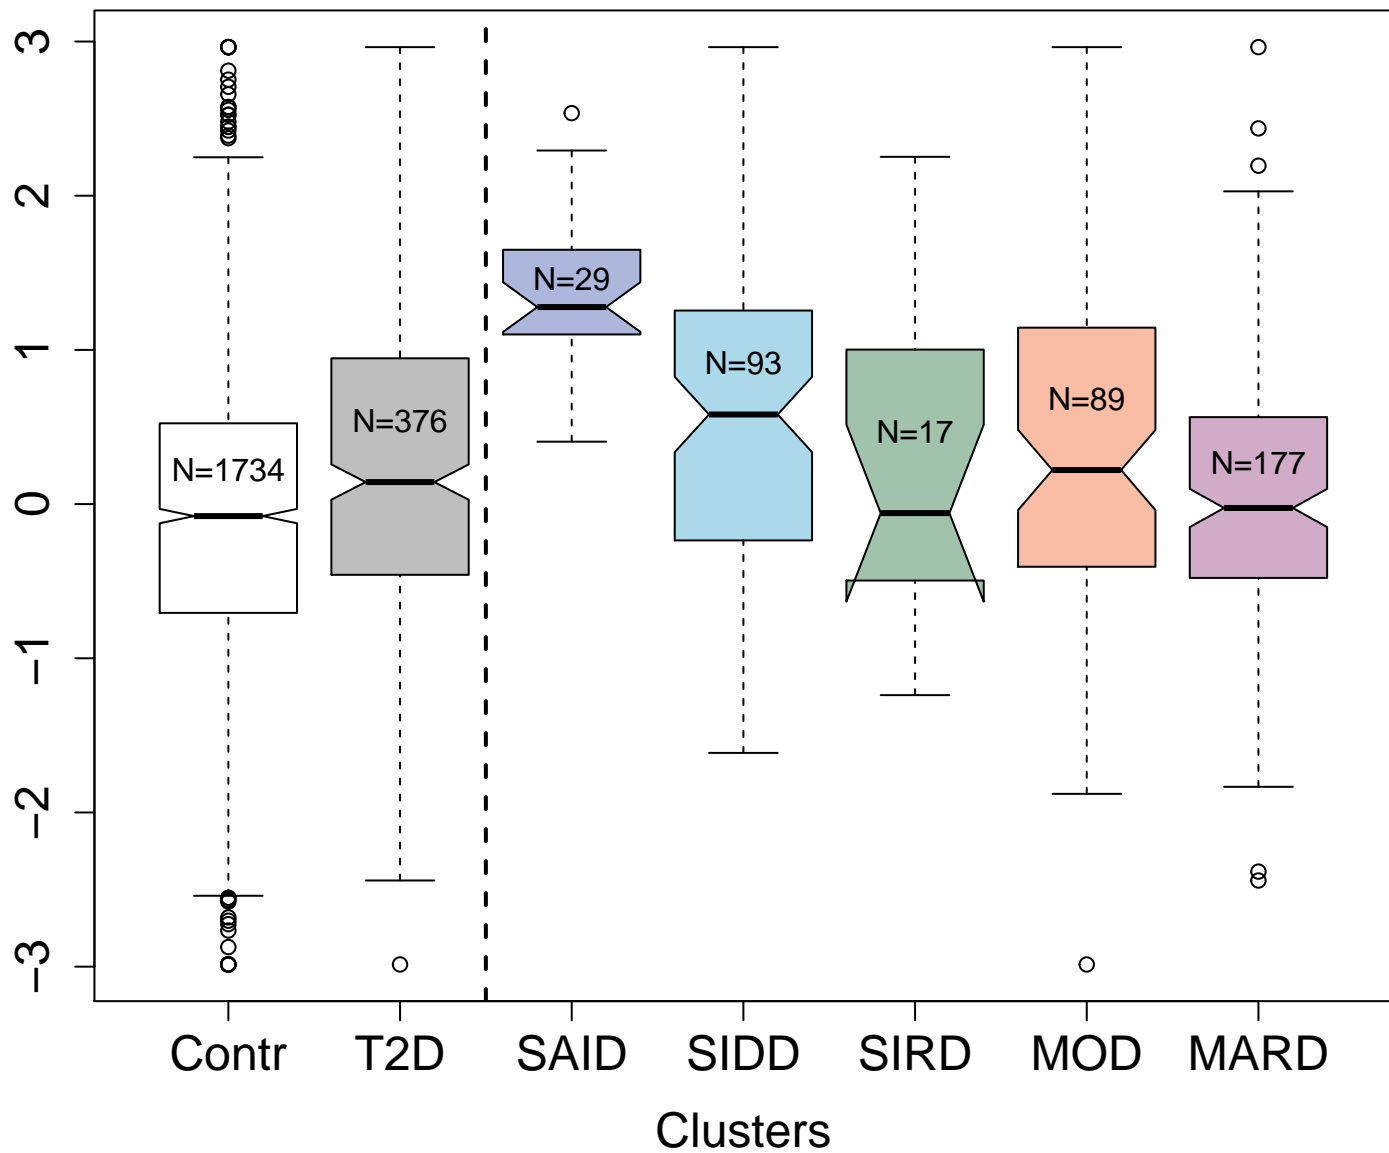

M3147 : xanthine

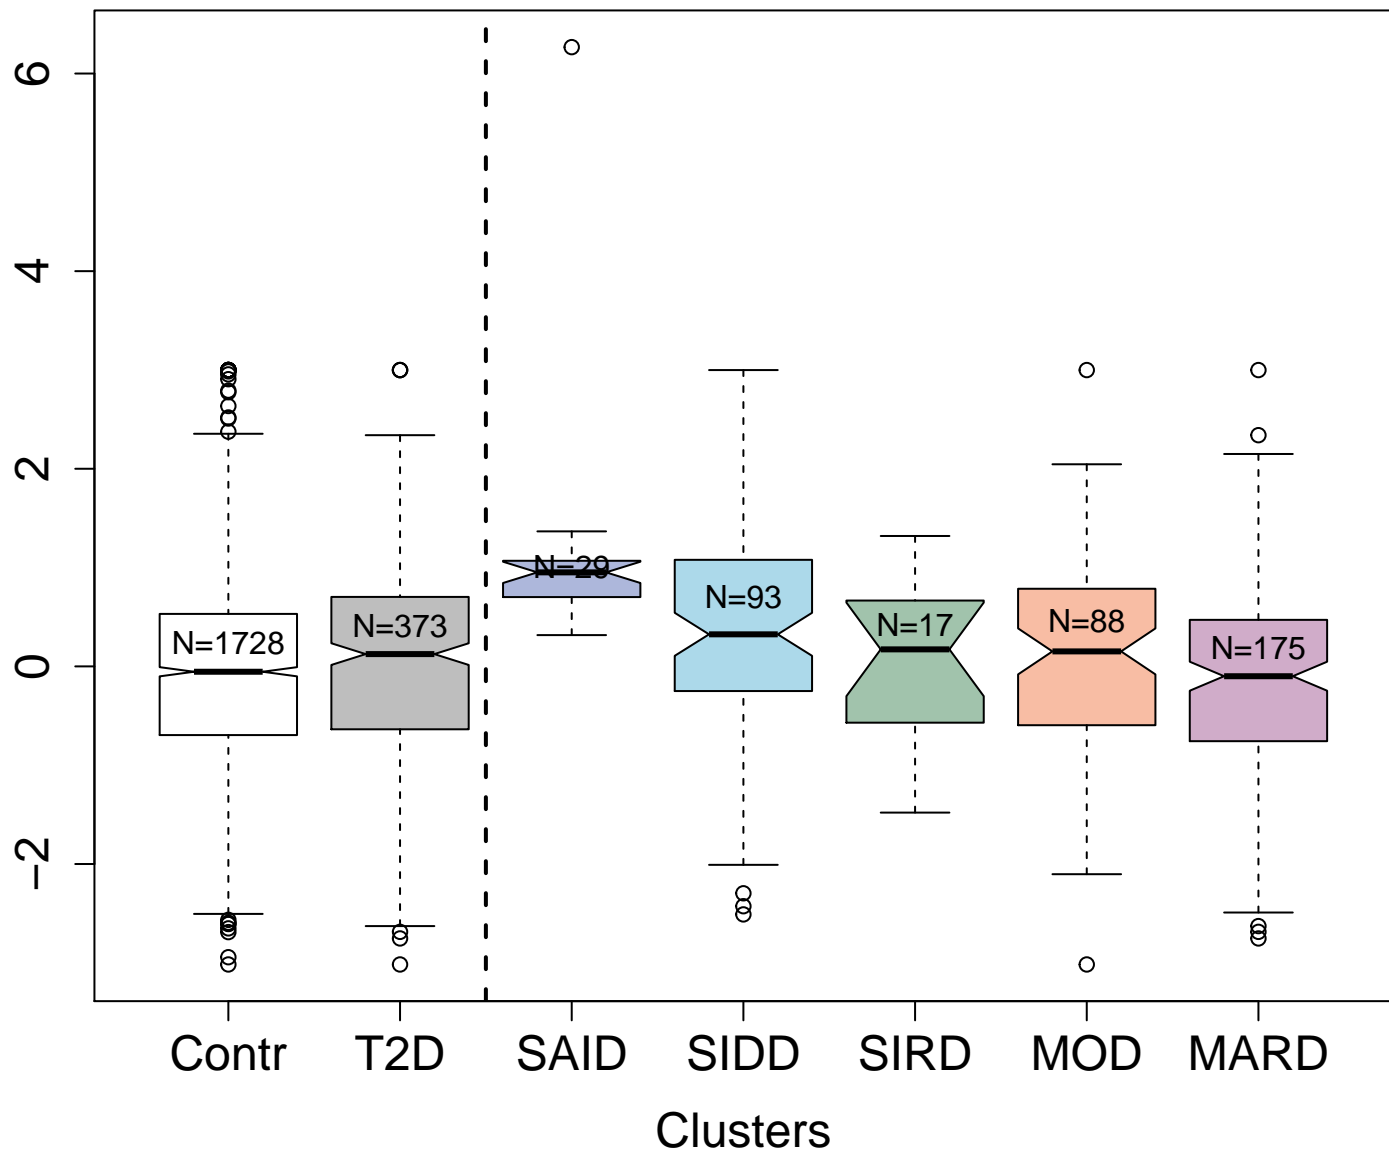

M1498 : N6,N6,N6-trimethyllysine

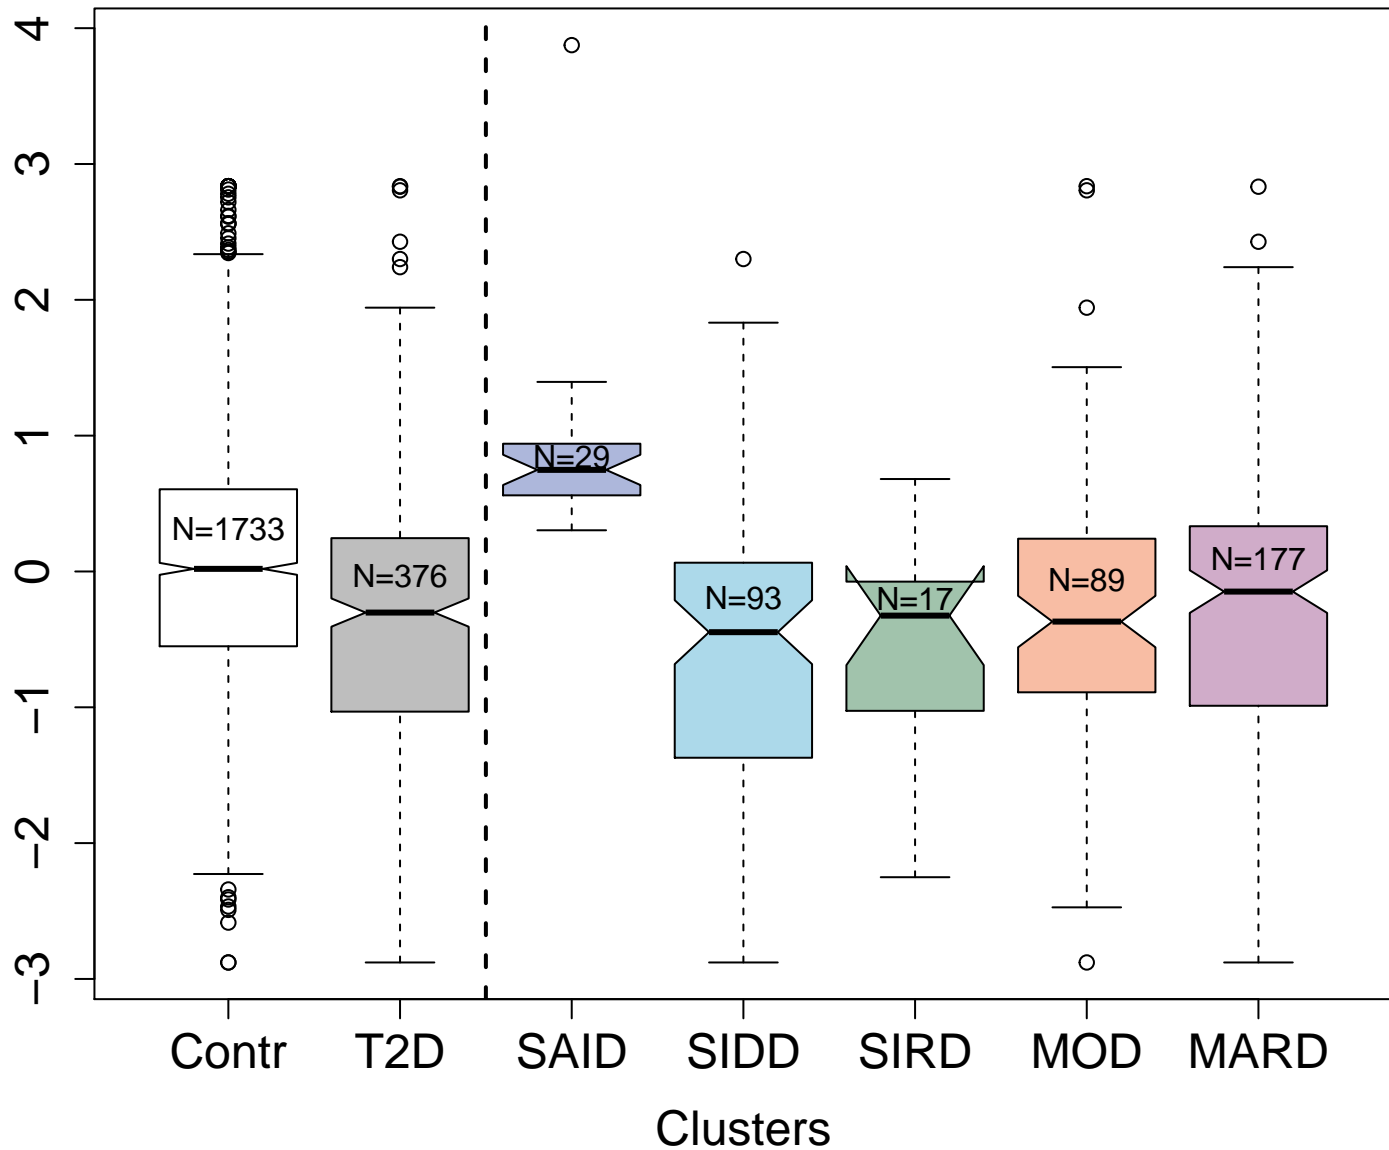

M52474 : 1-(1-enyl-palmitoyl)-GPC (P-16:0)\*

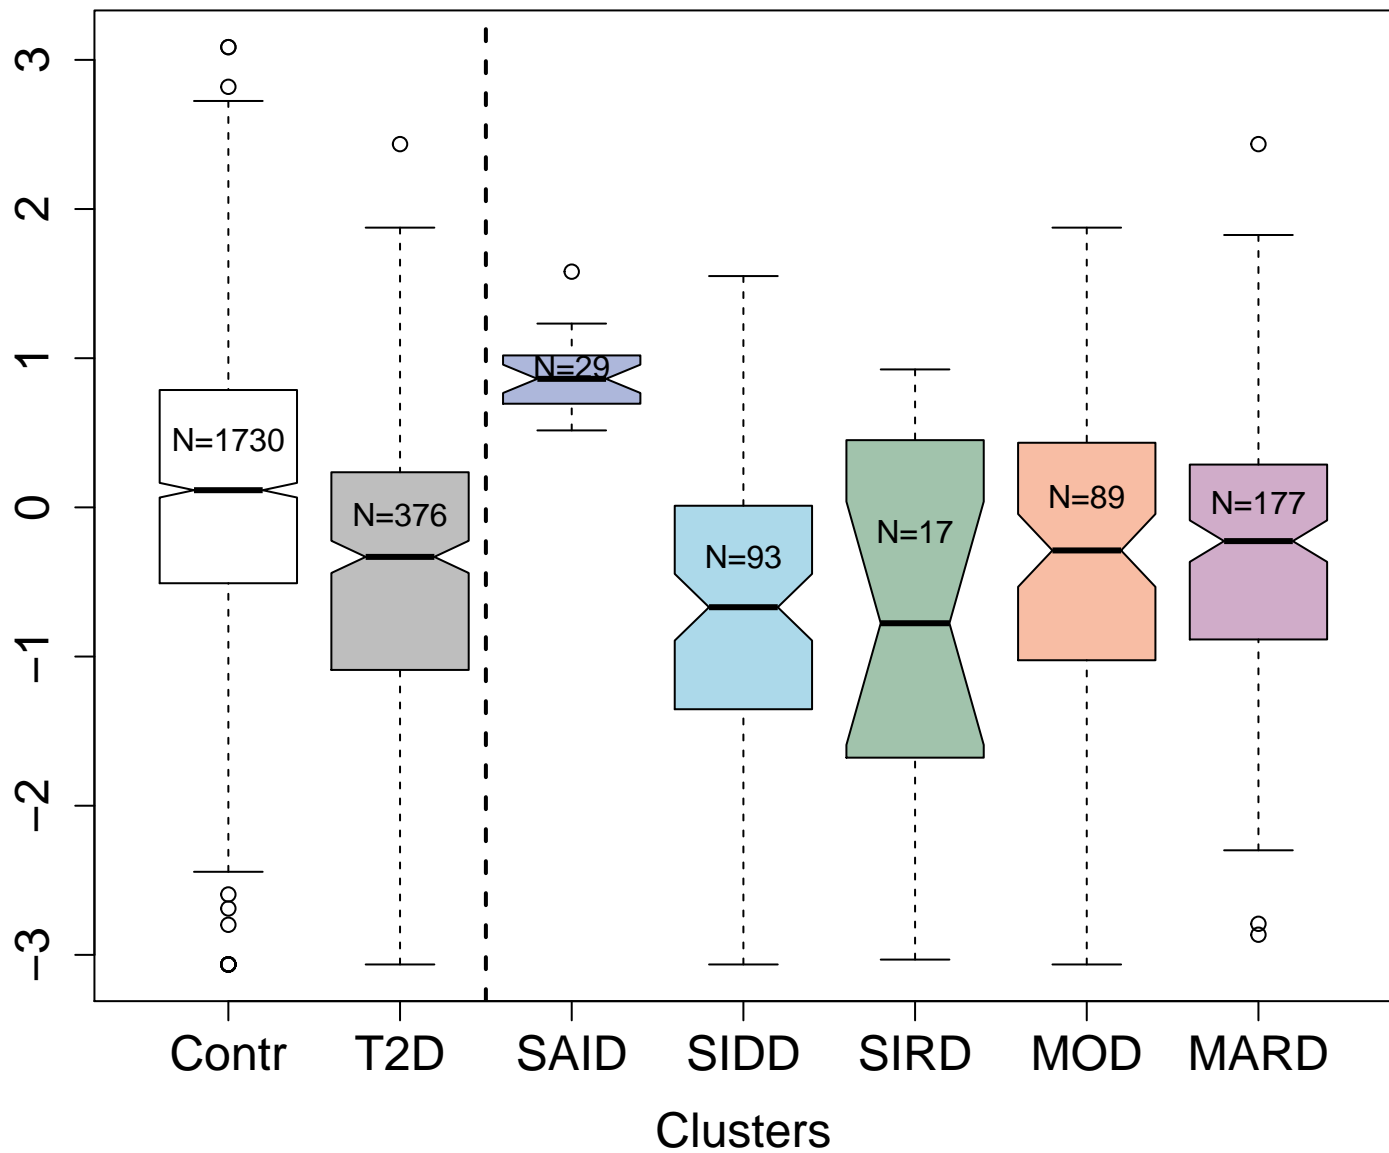

M1552 : erucate (22:1n9)

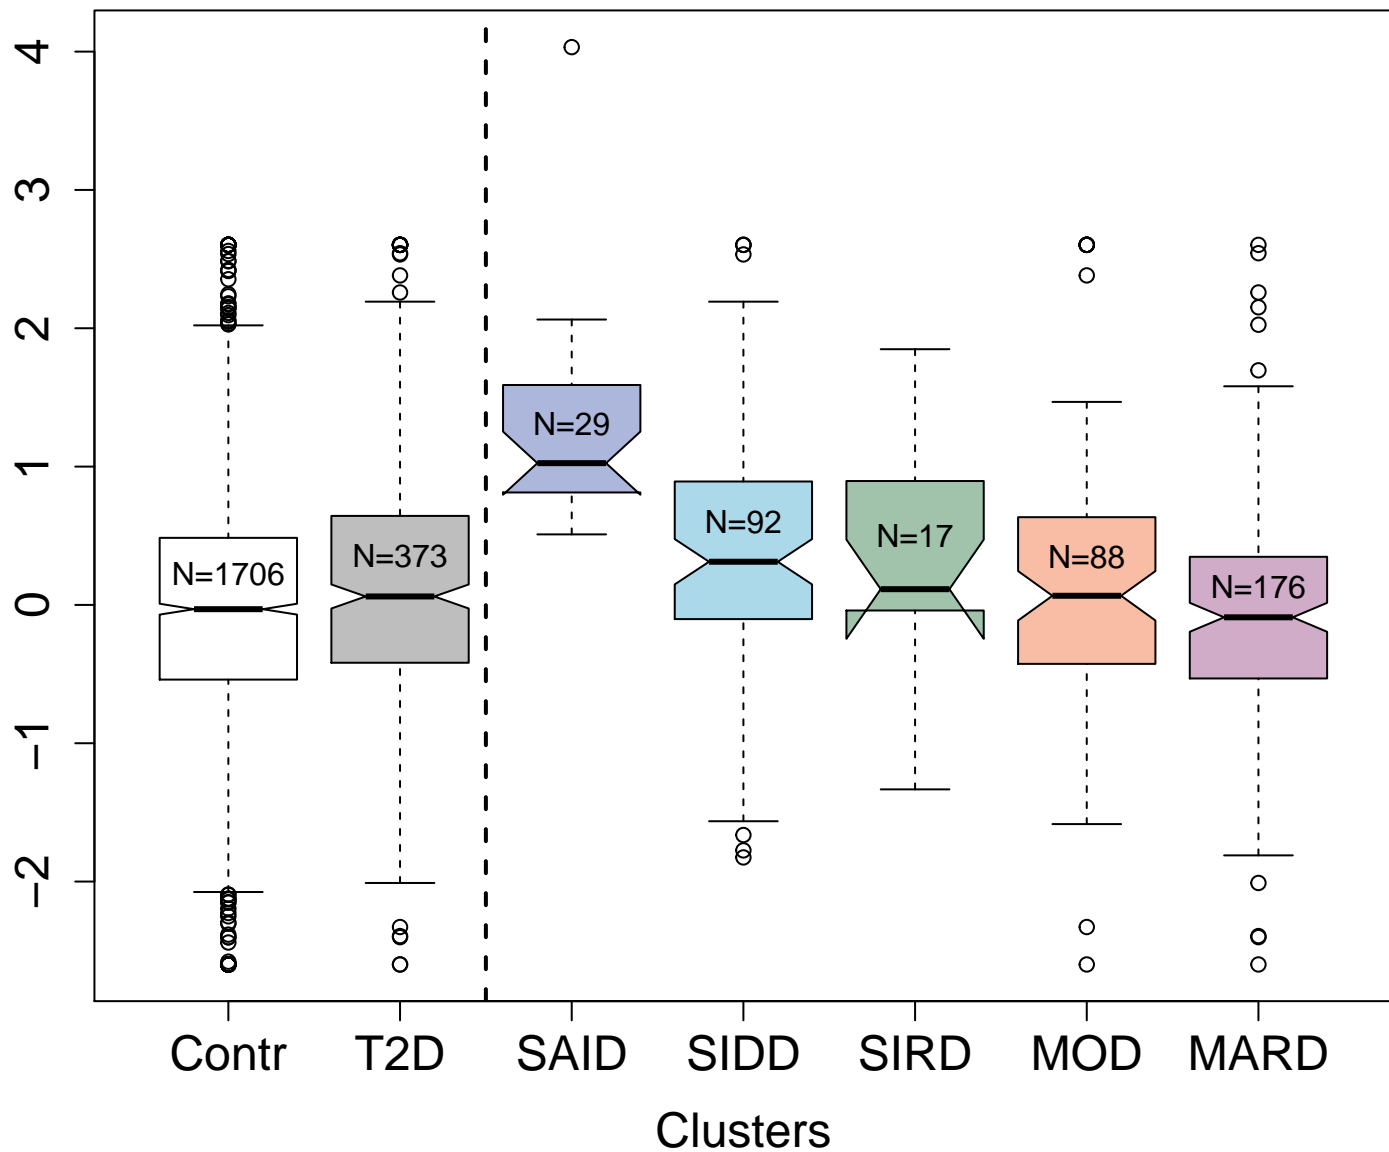

M37529 : sphingomyelin (d18:1/18:1, d18:2/18:0)

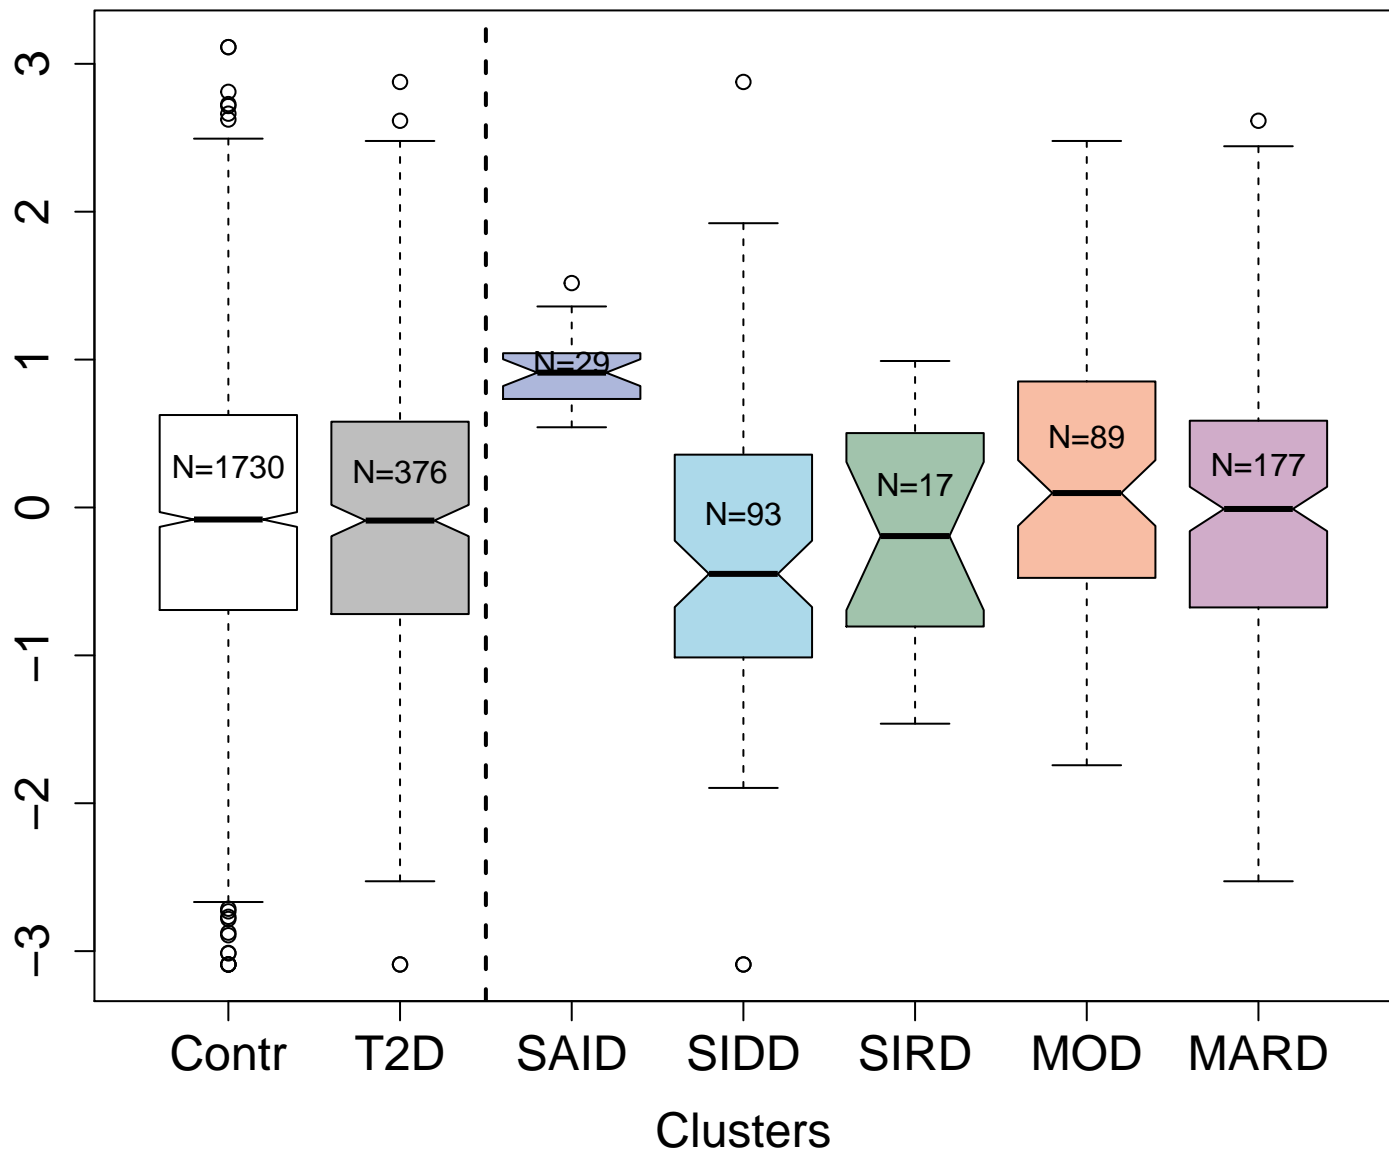



M48114 : 1-methylguanidine

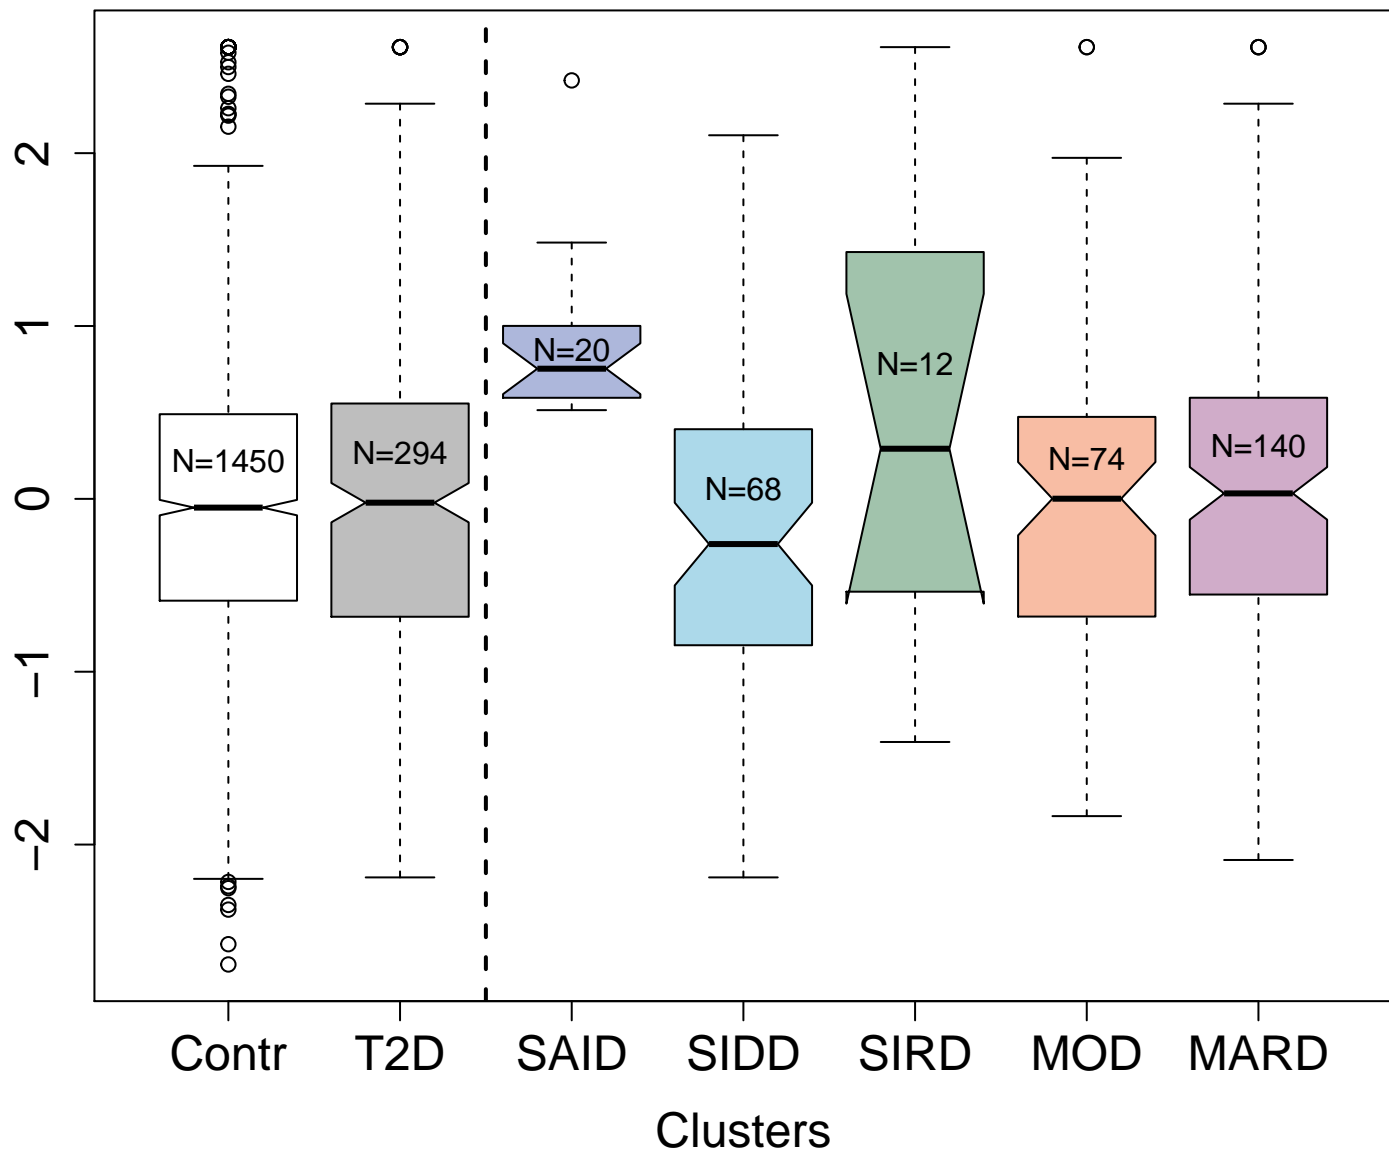

M61868 : 1-ribosyl-imidazoleacetate\*

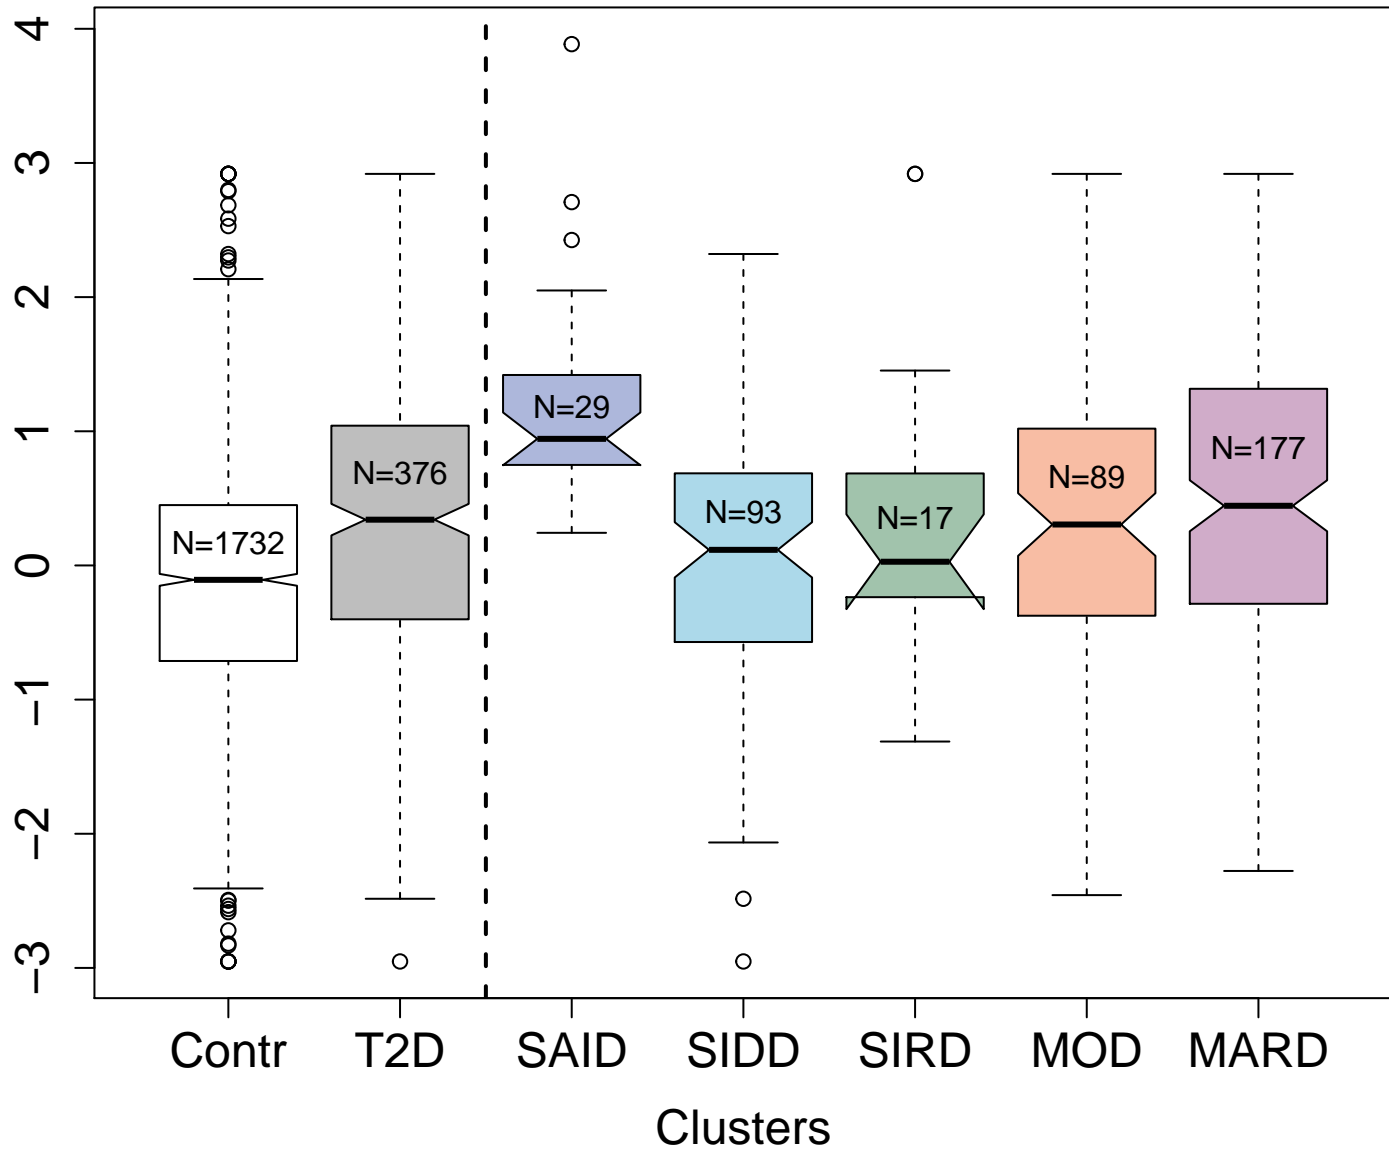

M1361 : pentadecanoate (15:0)

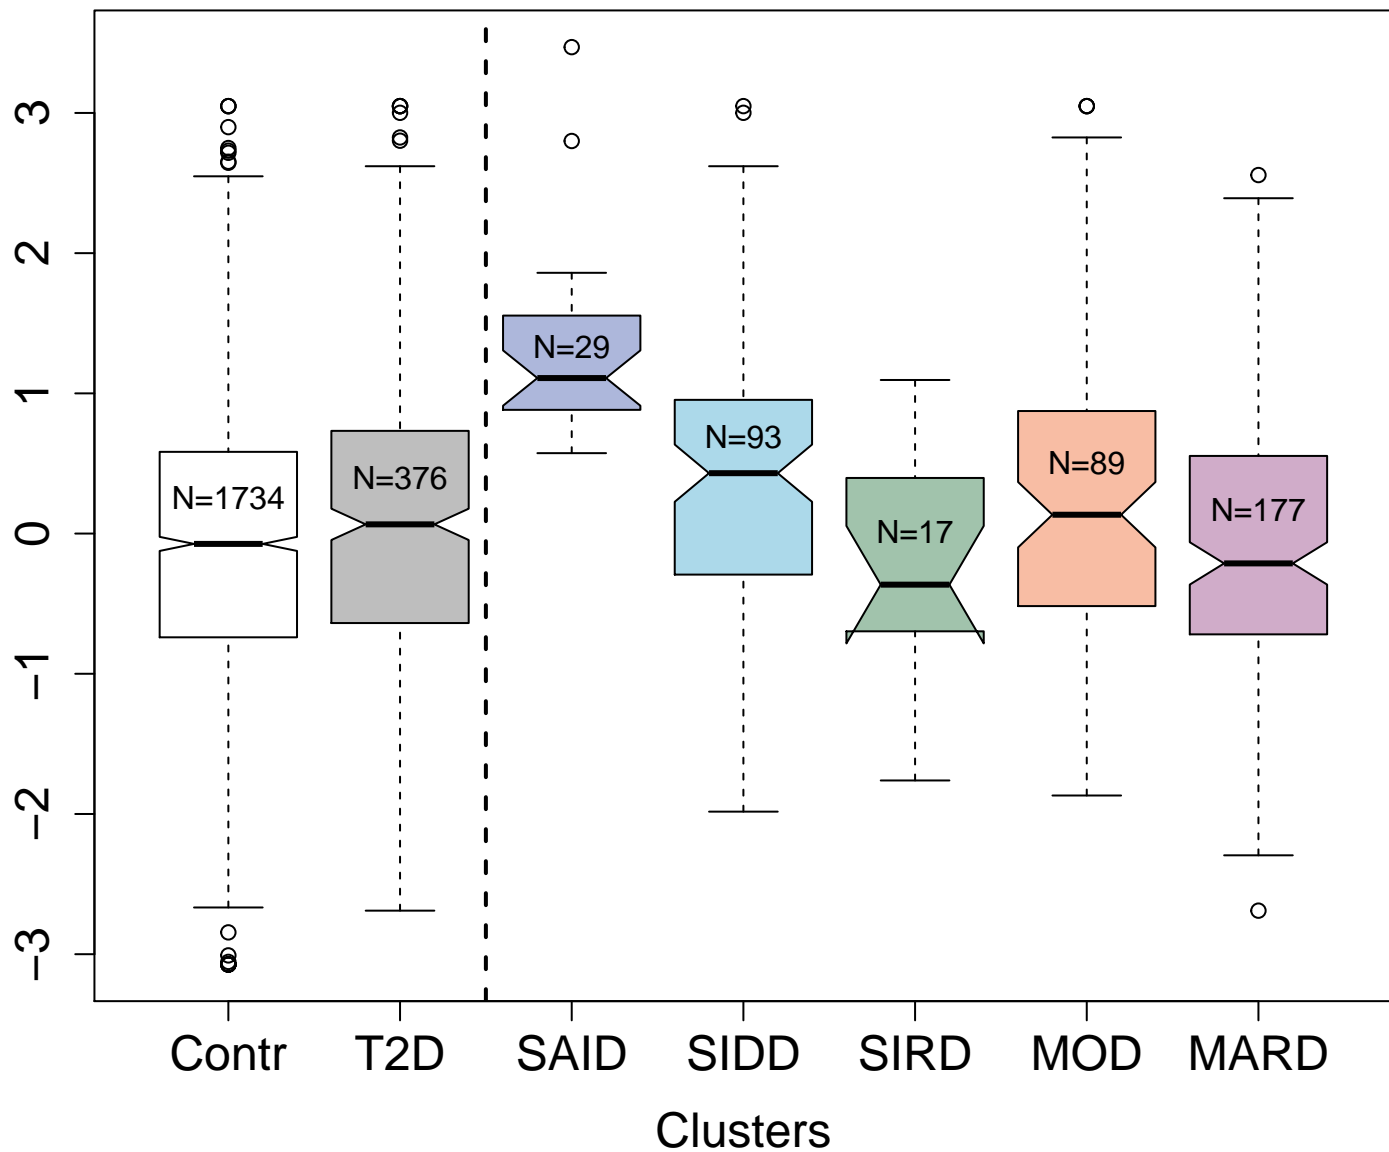

M33942 : N-acetylasparagine

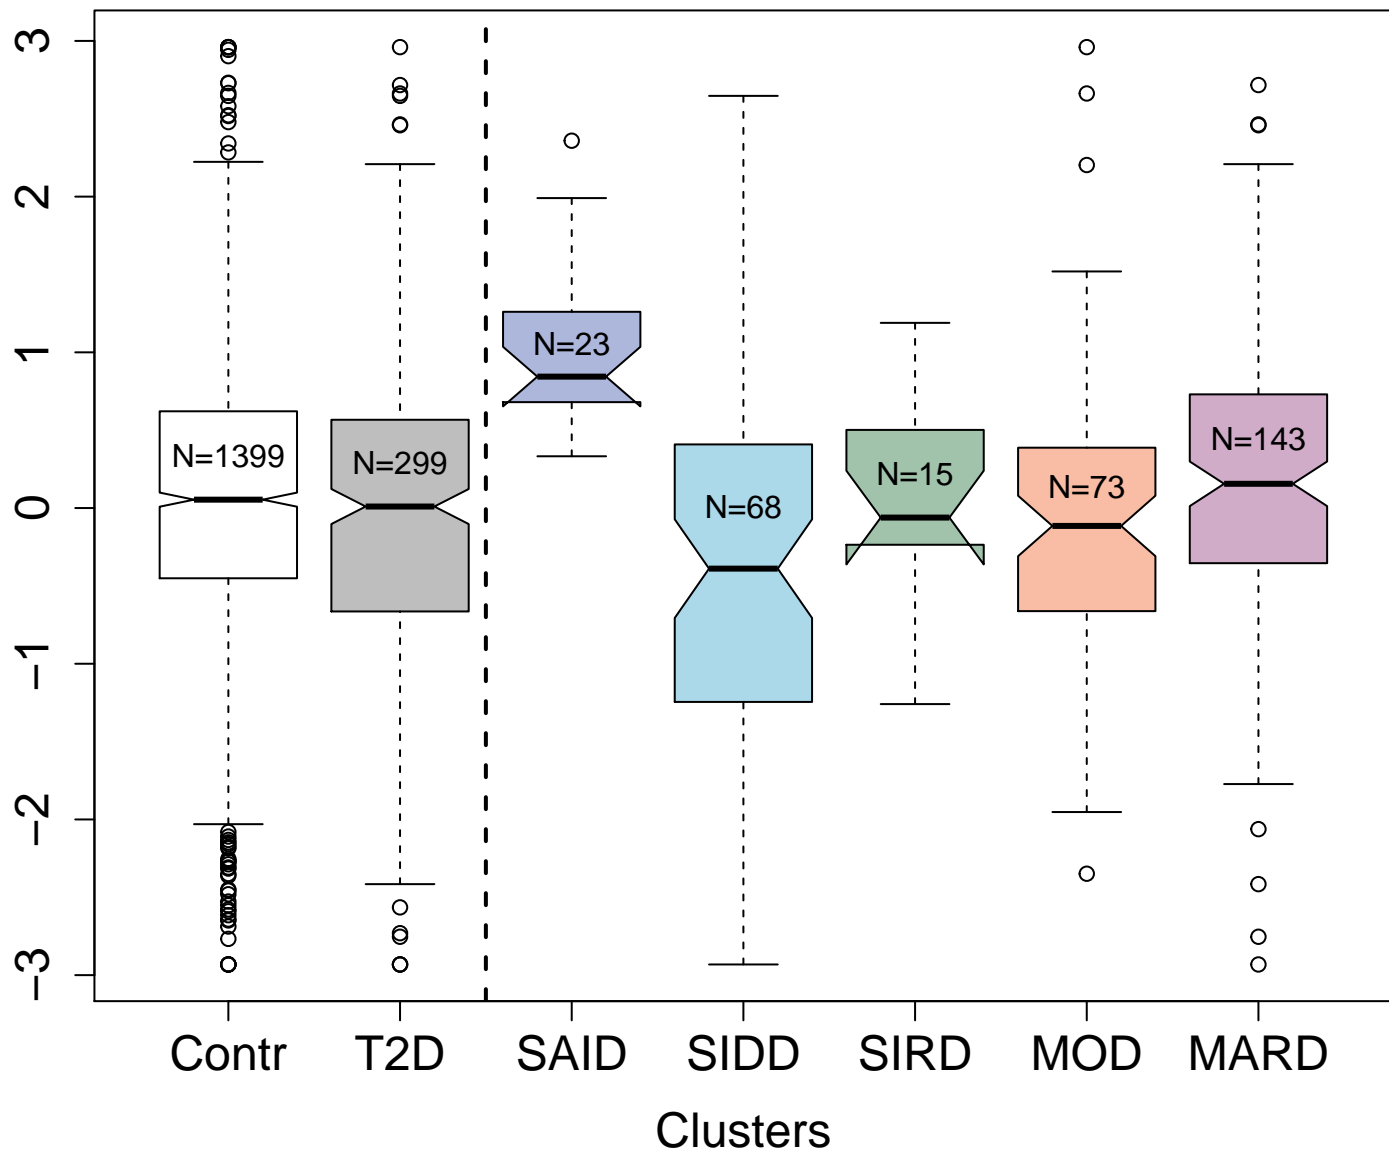

M46710 : X - 17690

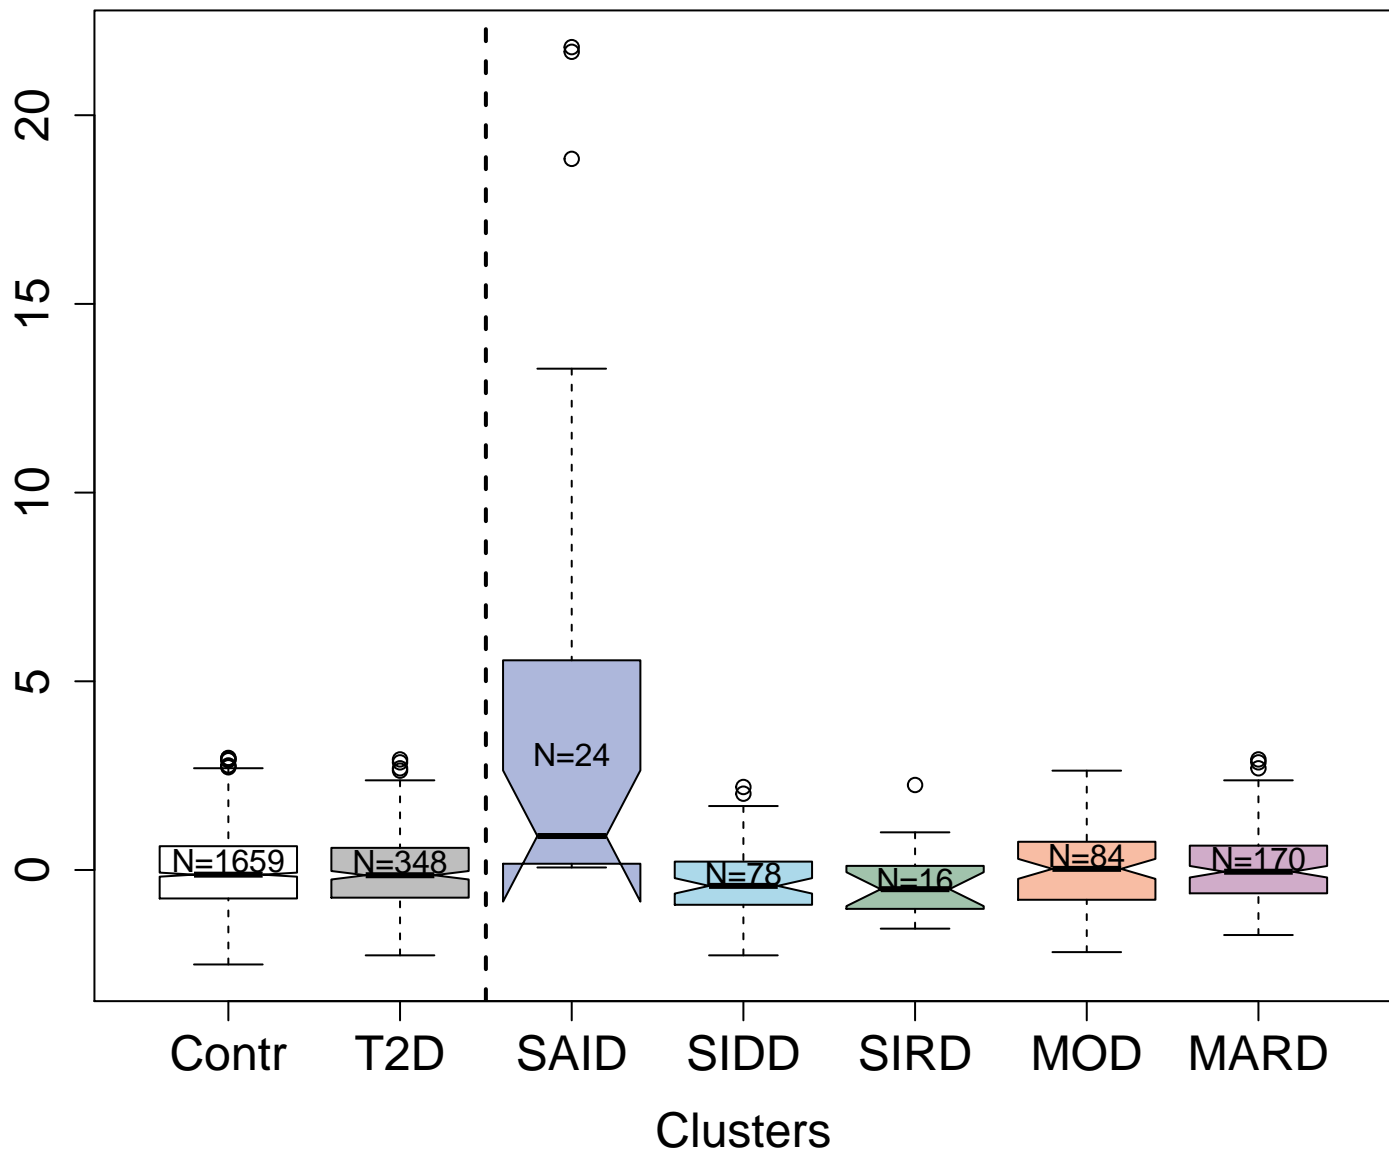

M33950 : N-acetylphenylalanine

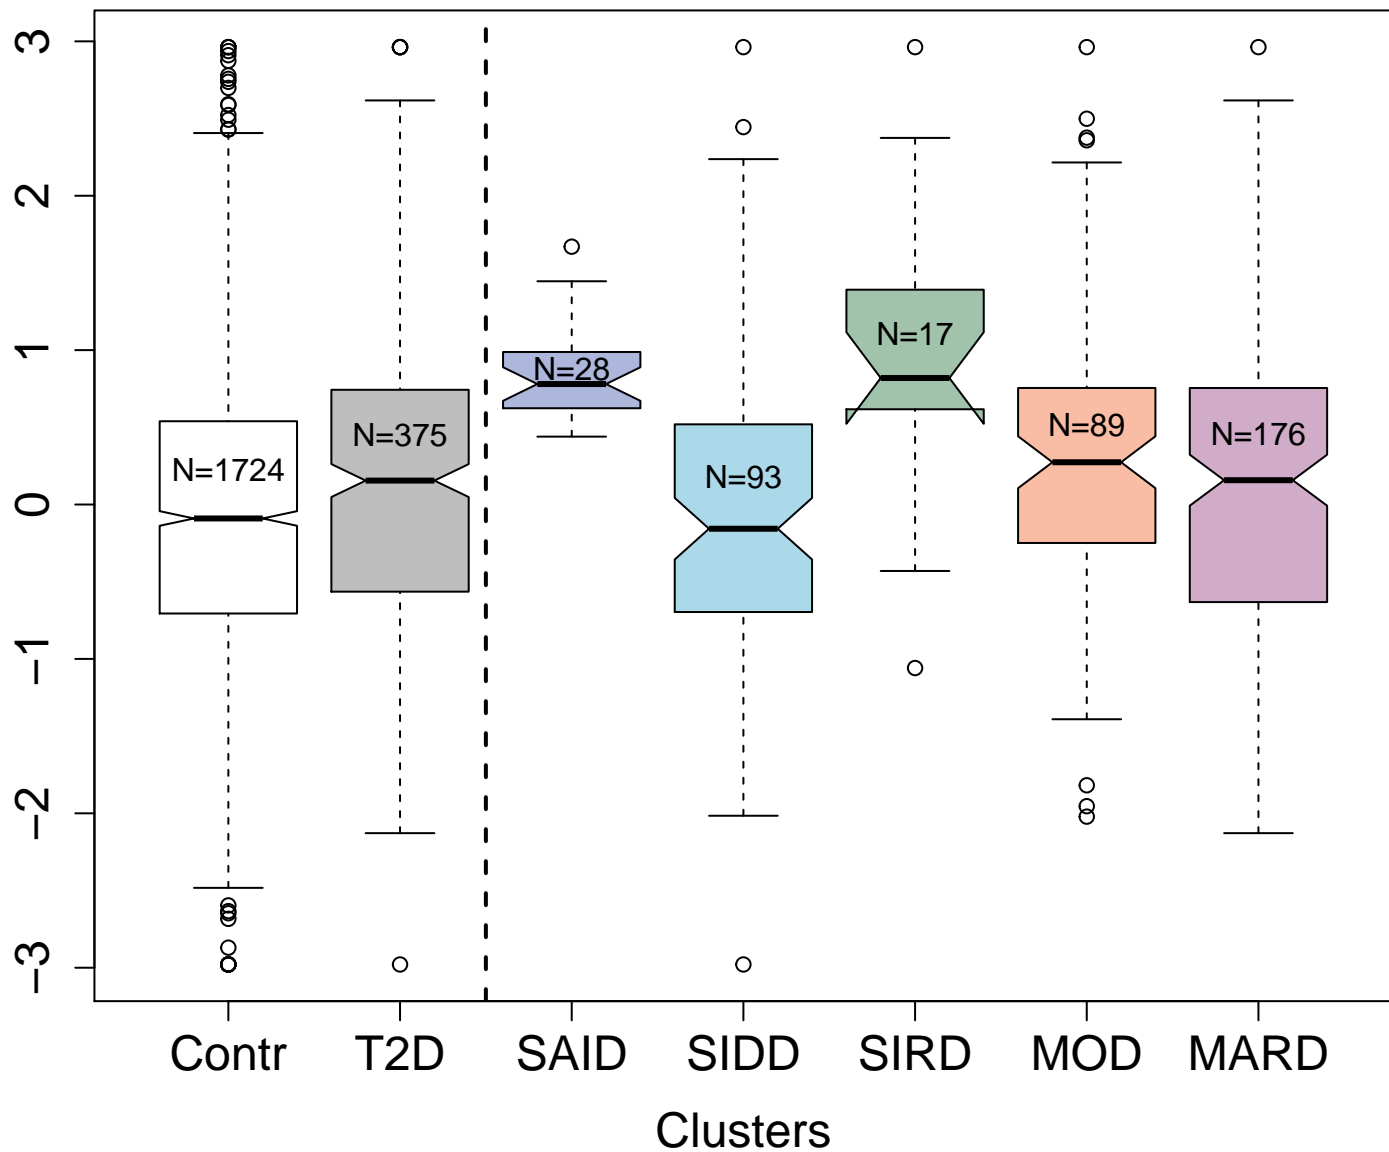

M63436 : (2 or 3)-decenoate (10:1n7 or n8)

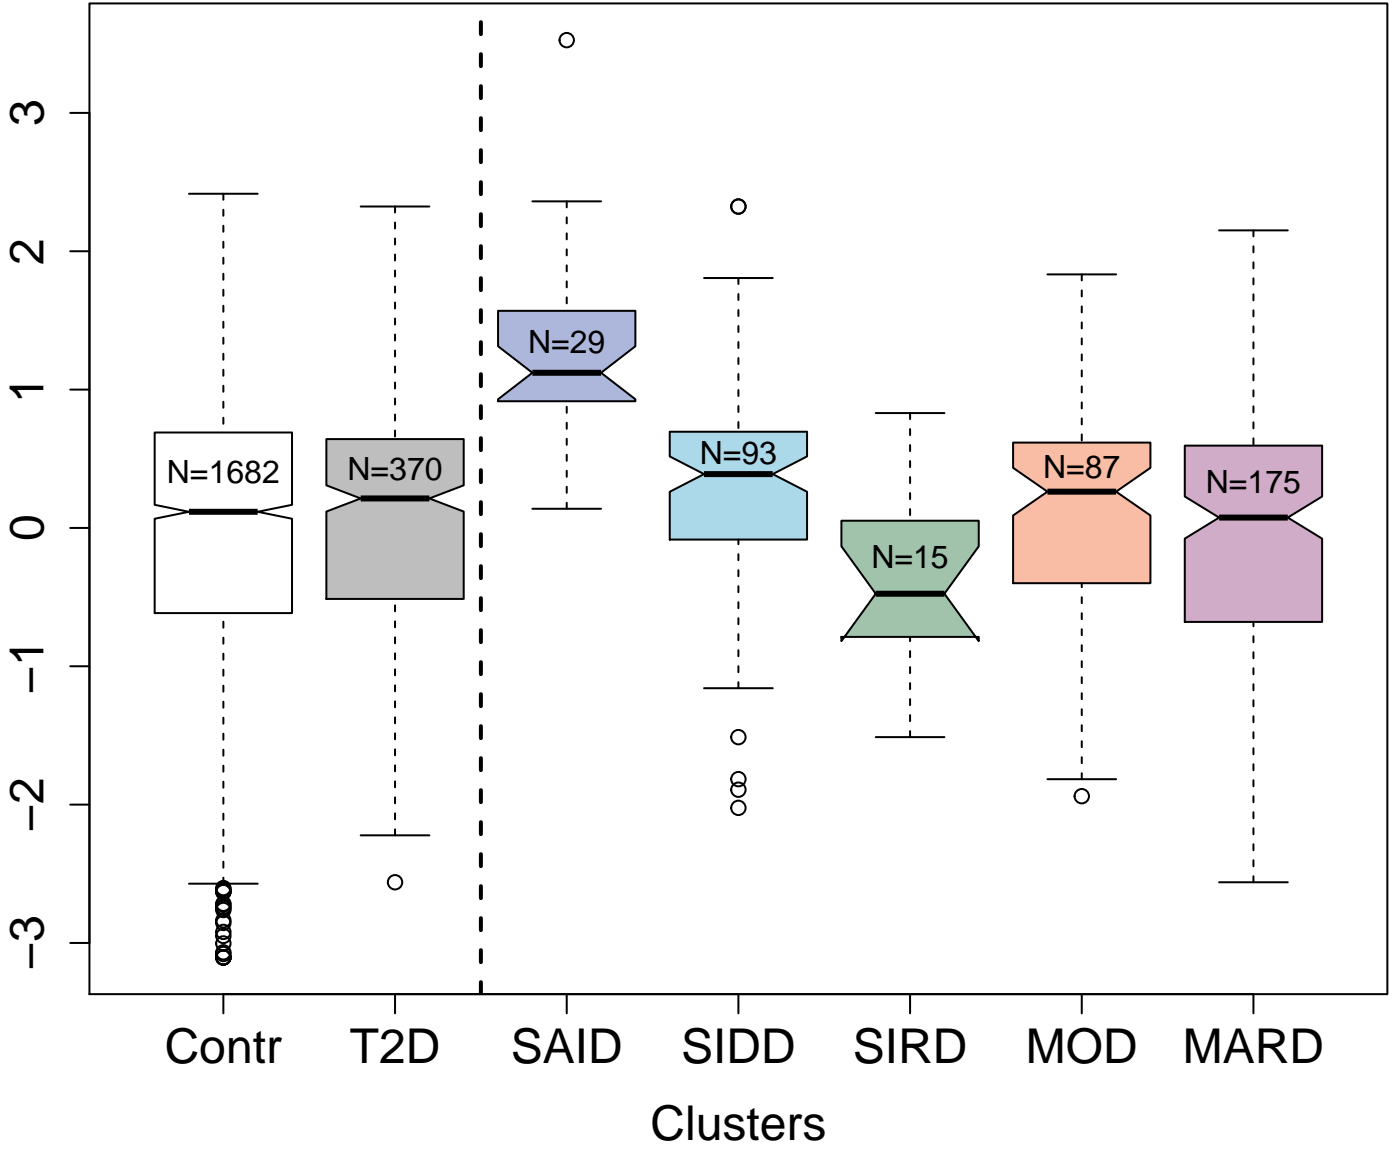

M61861 : octadecenedioate (C18:1-DC)

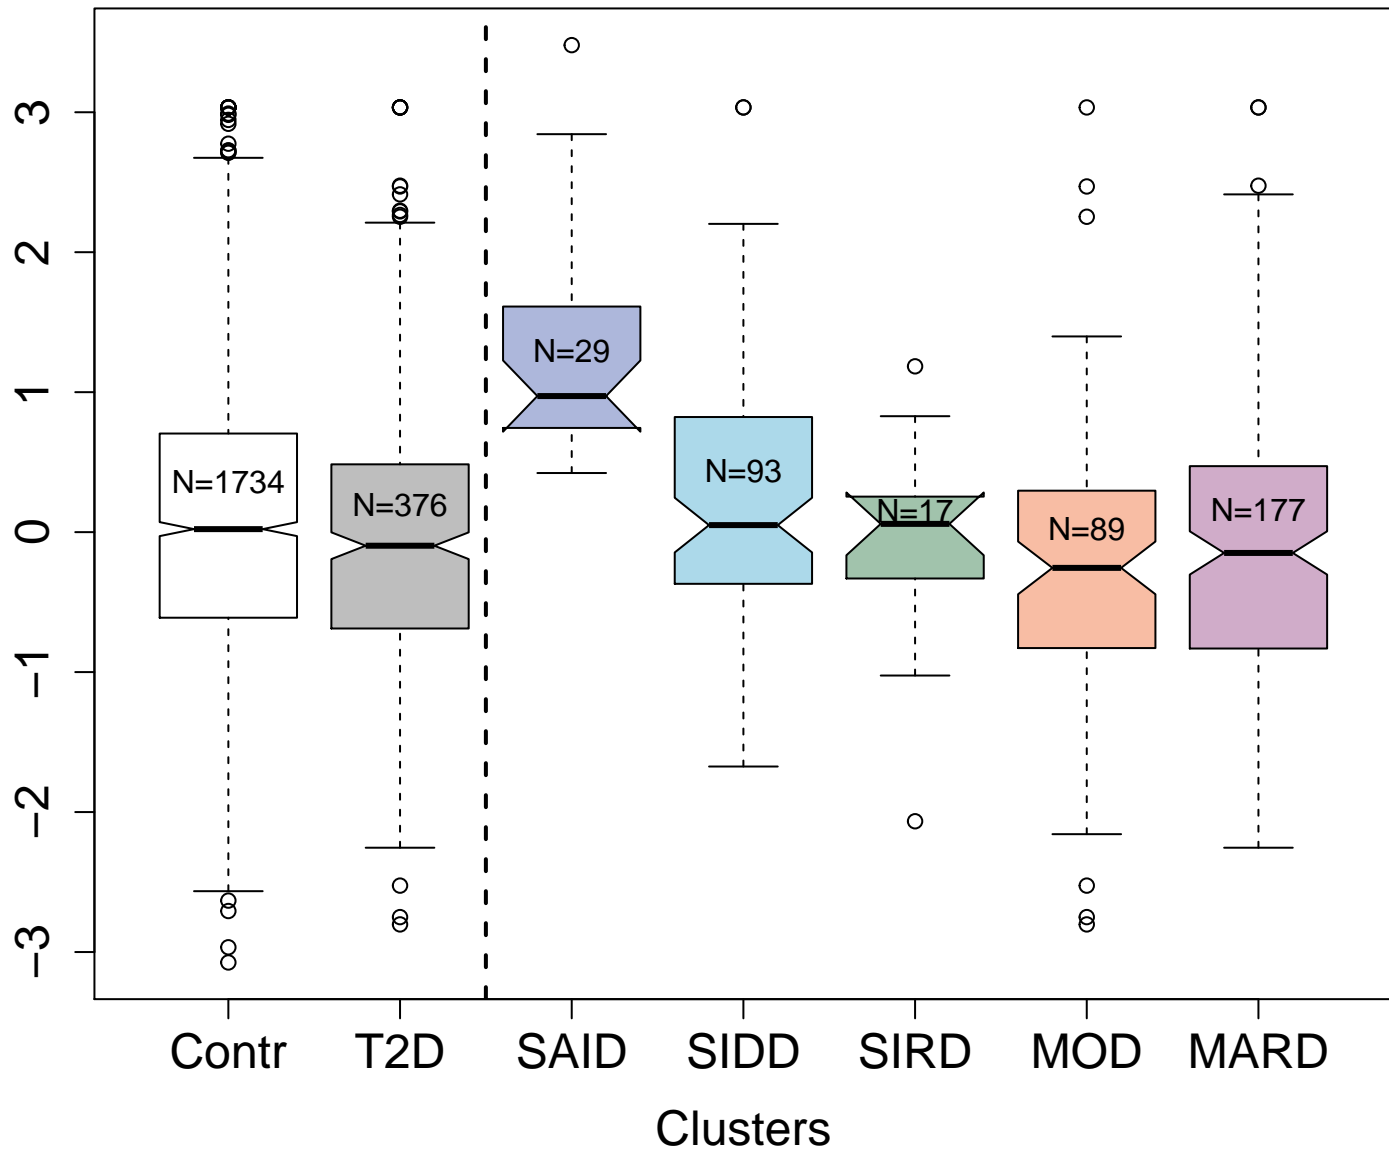



M46539 : N-acetylglucosamine/N-acetylgalactosamine

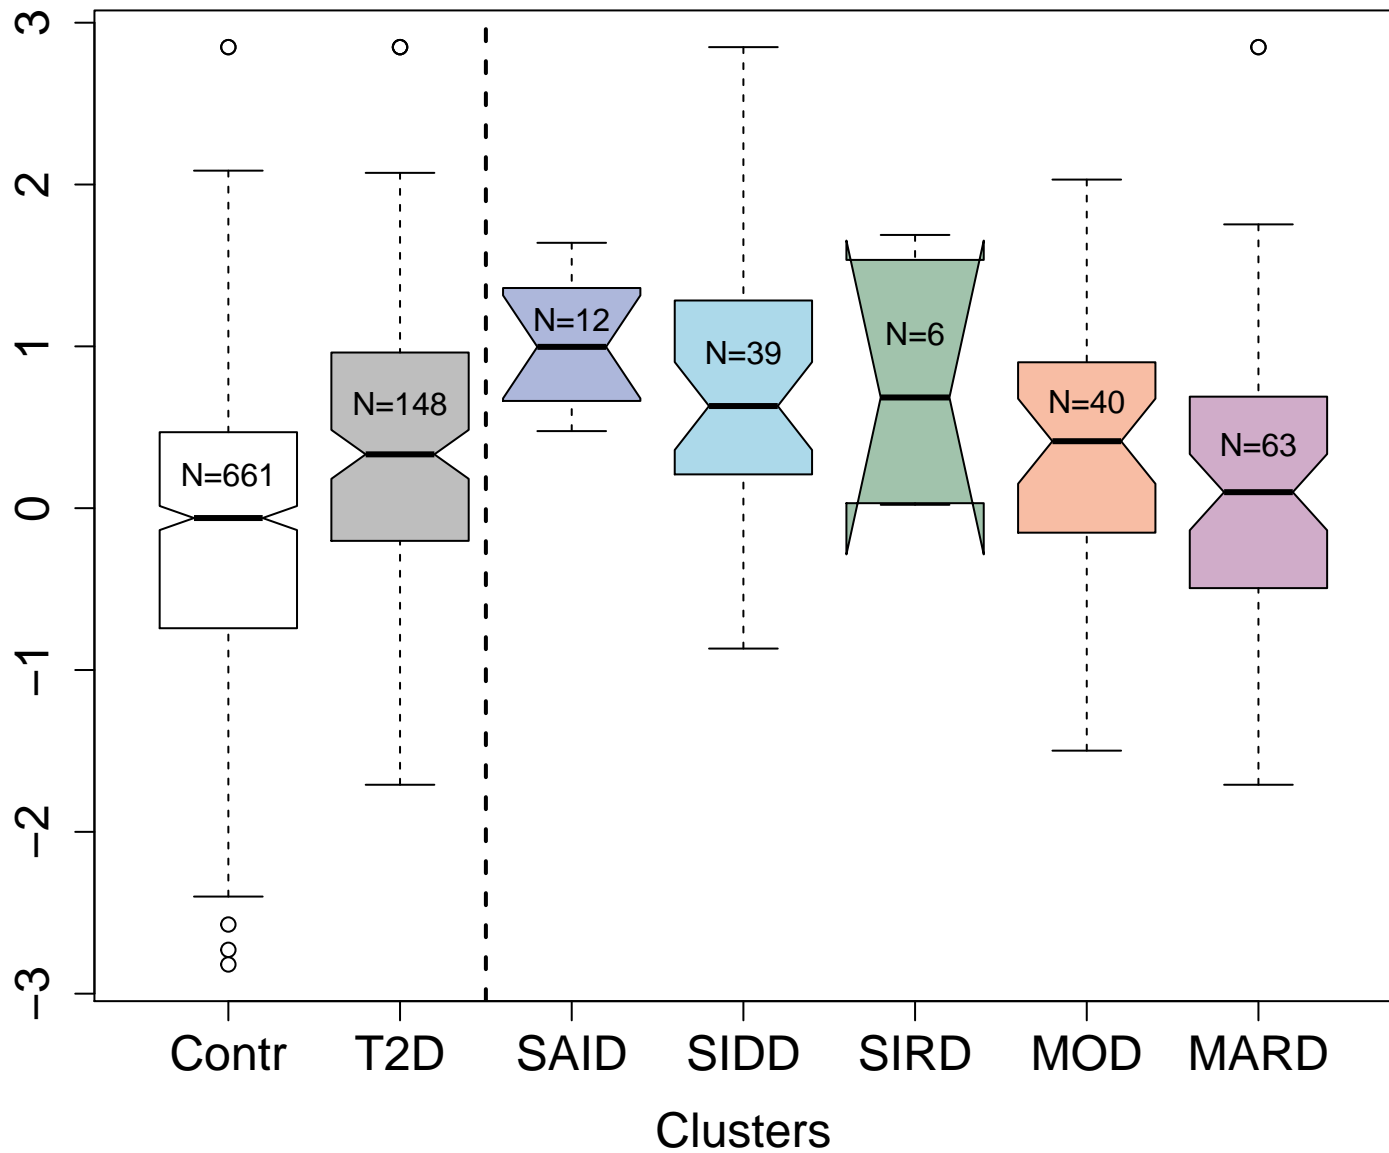

M62276 : dodecadienoate (12:2)\*

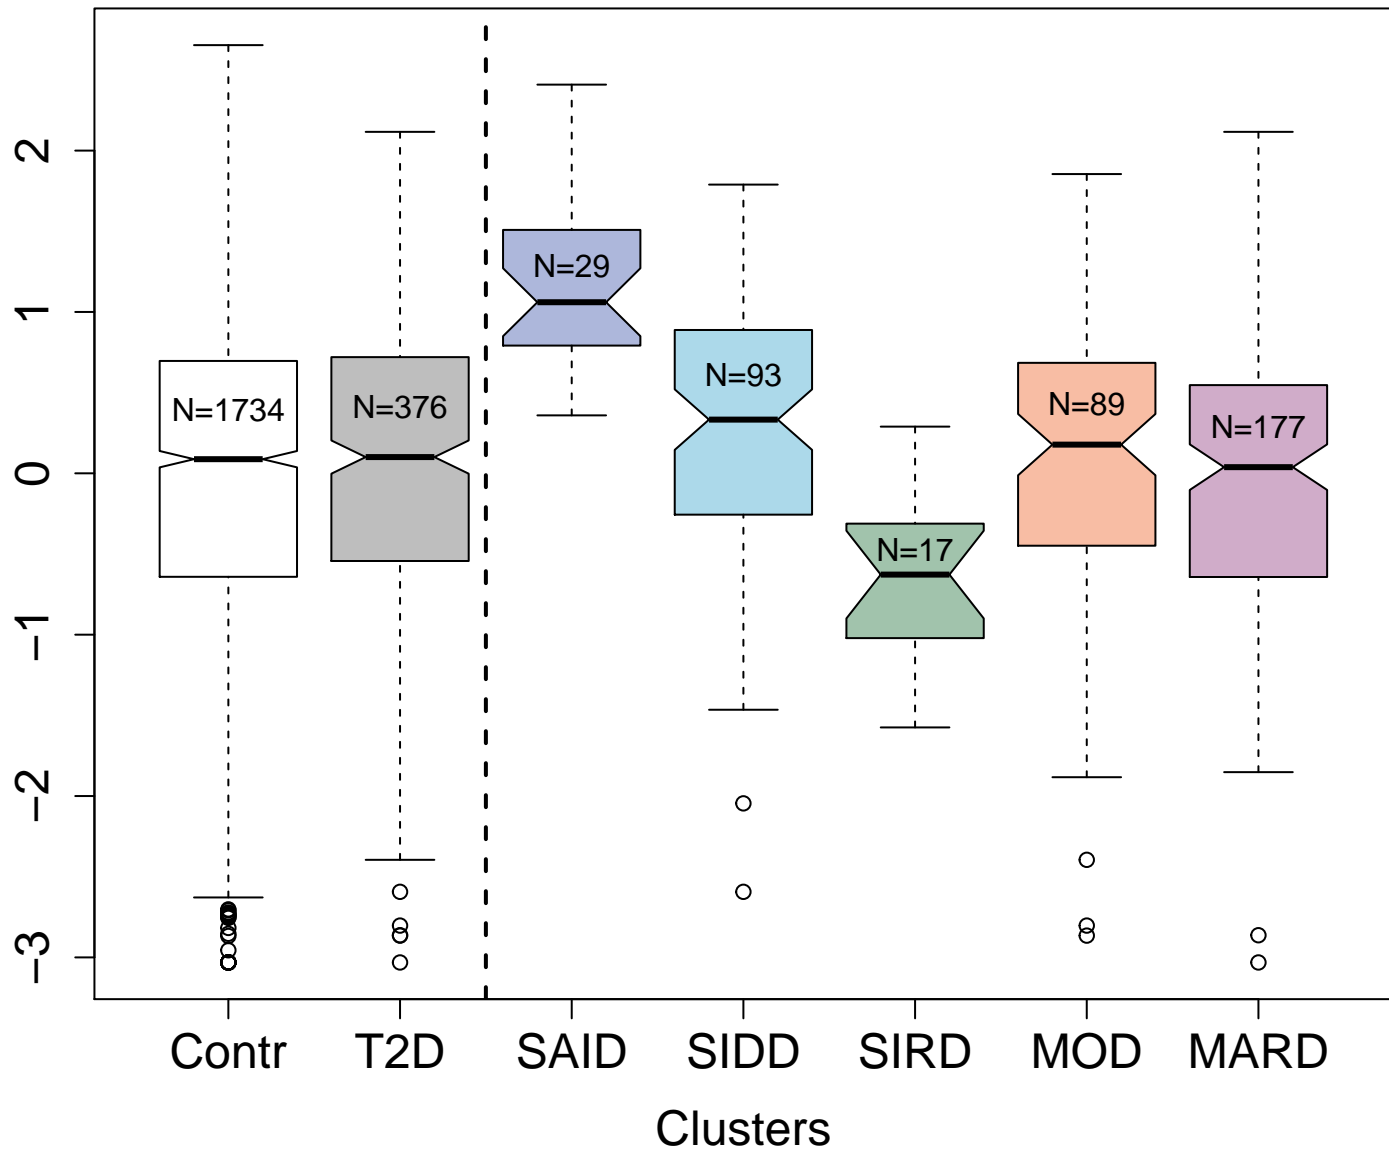

M48782 : C-glycosyltryptophan

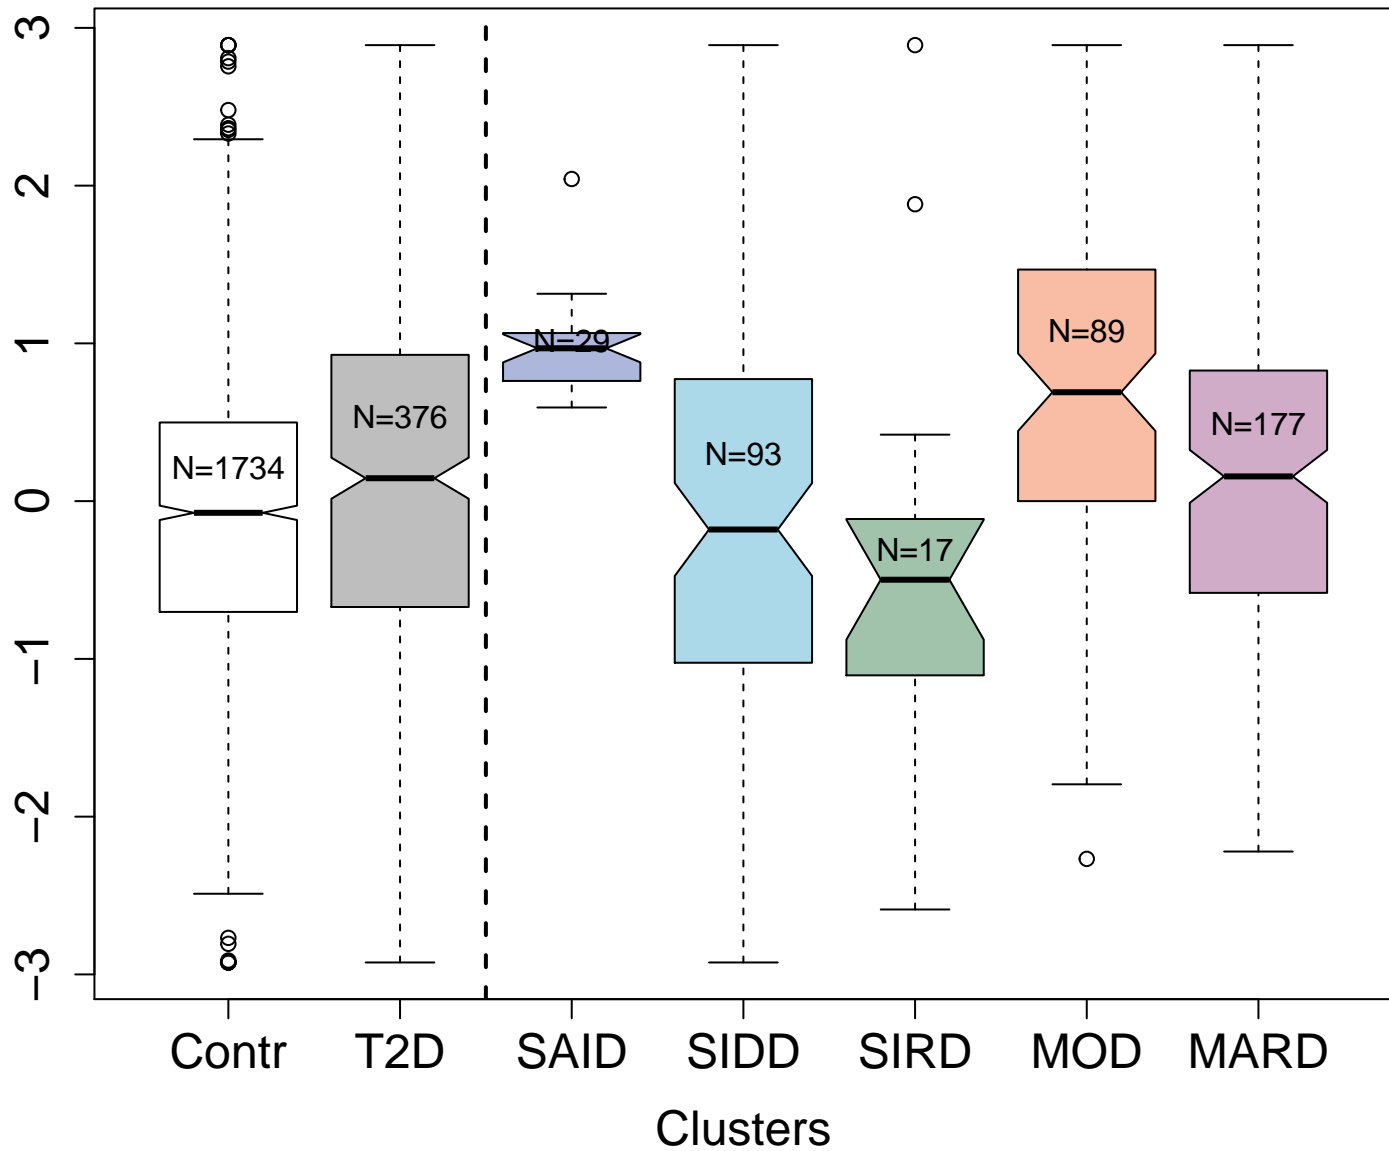

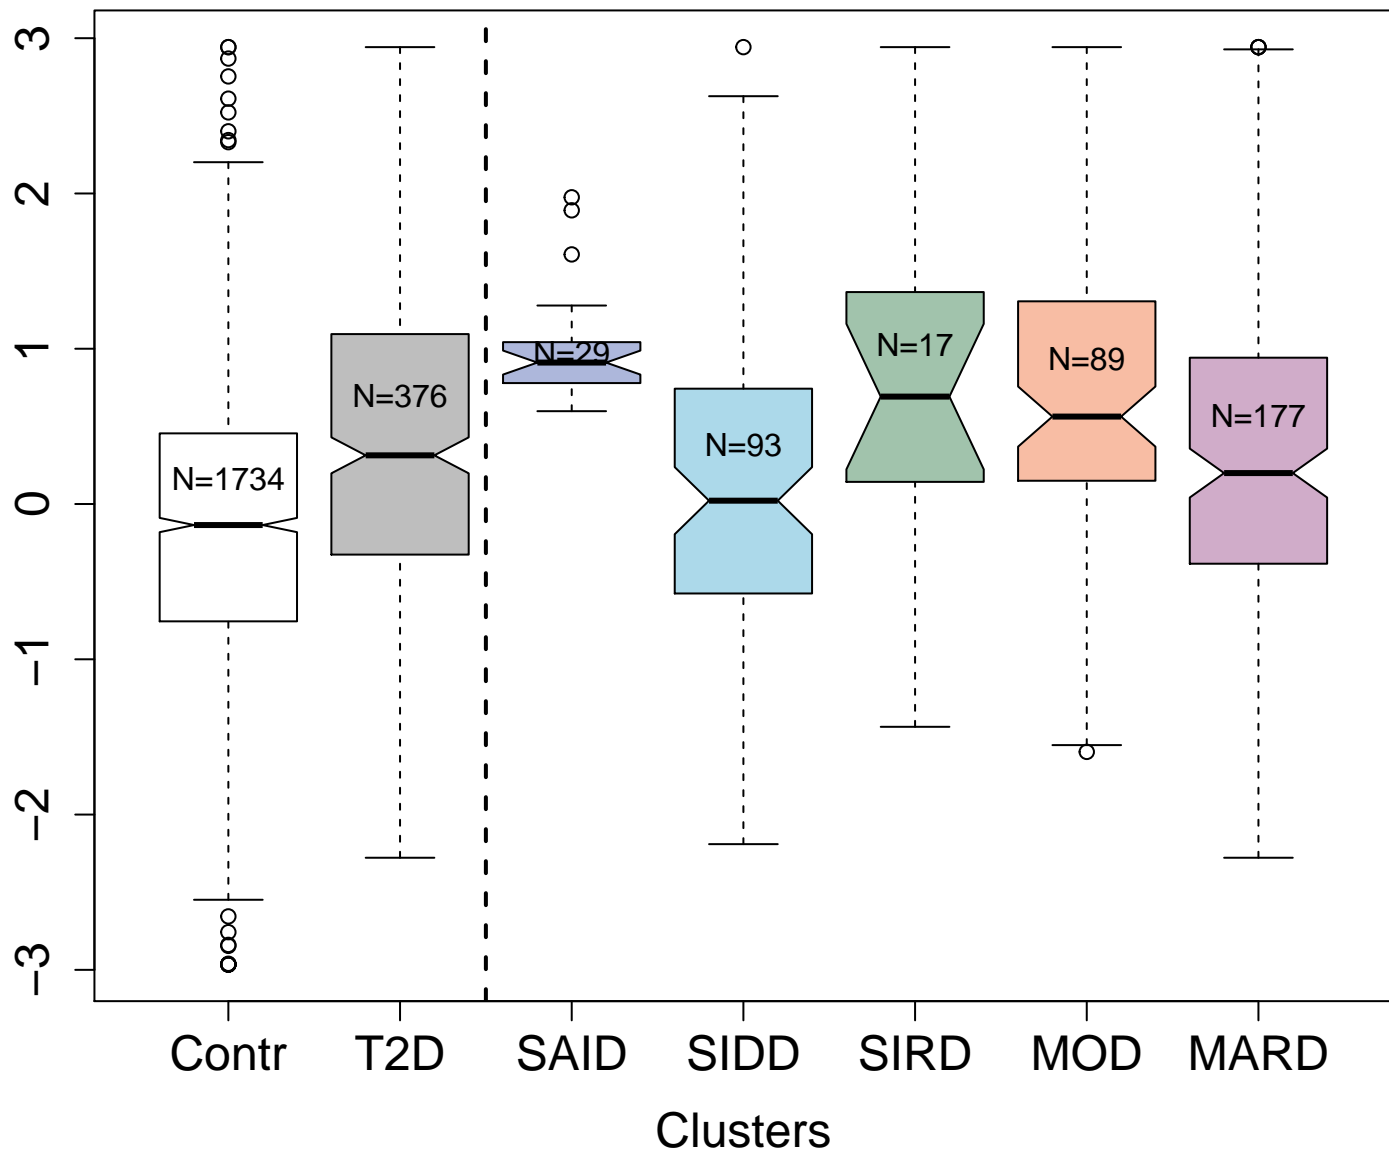

M37443 : cysteine sulfinic acid

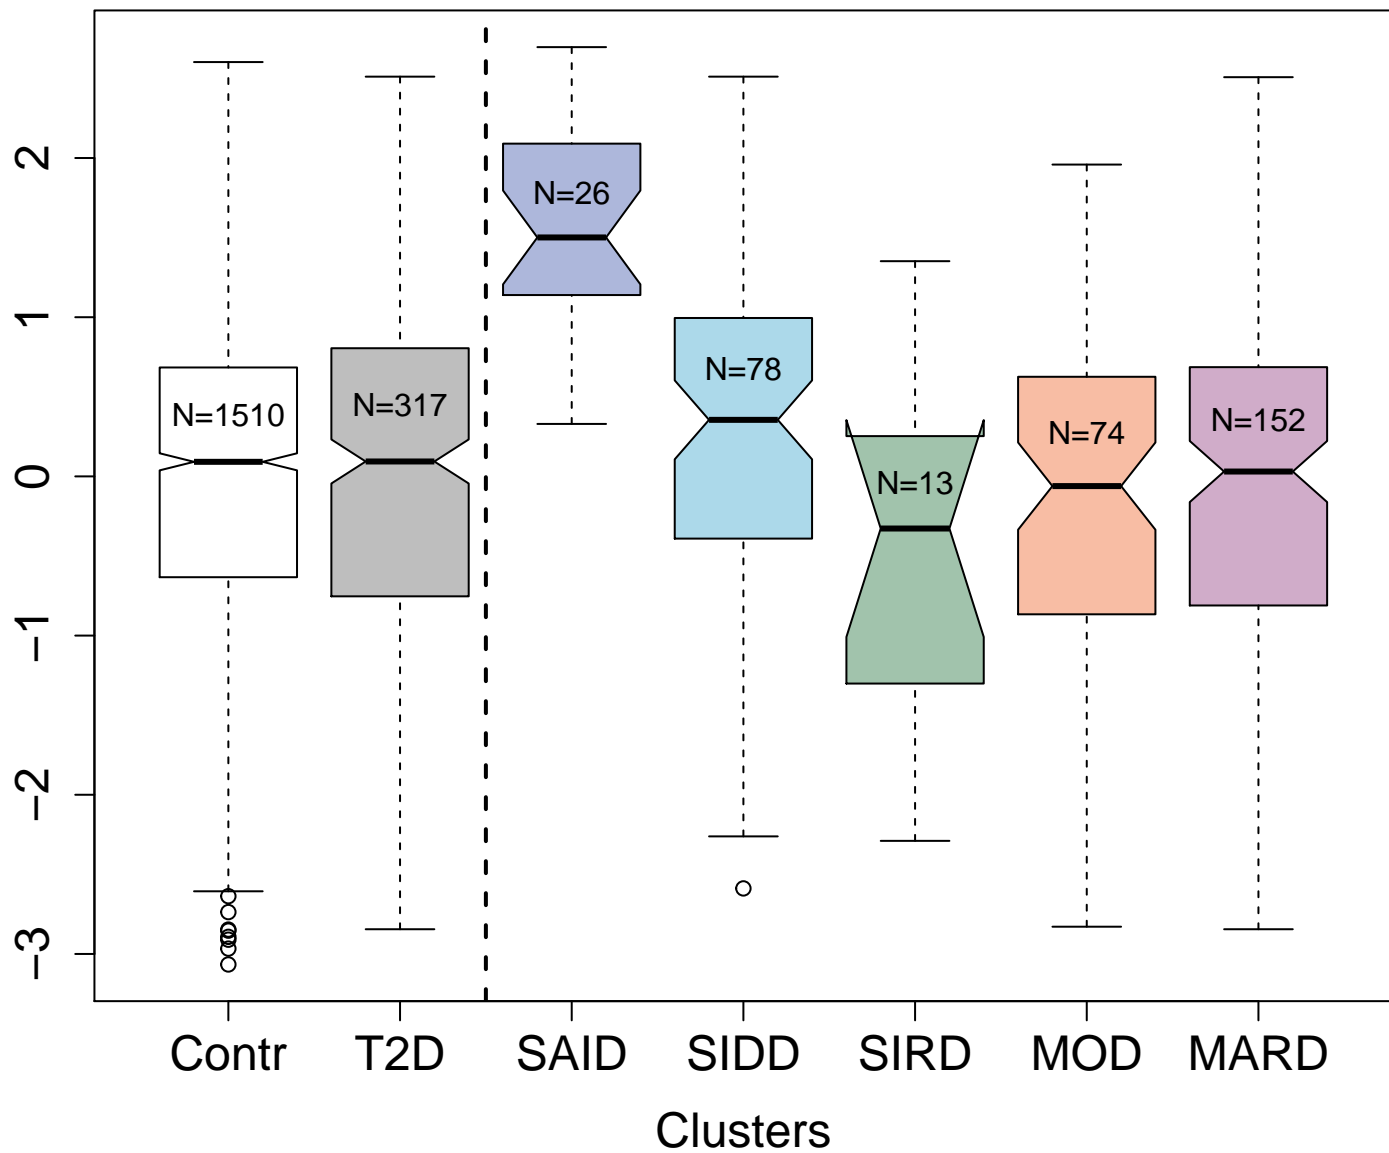

M554 : adenine

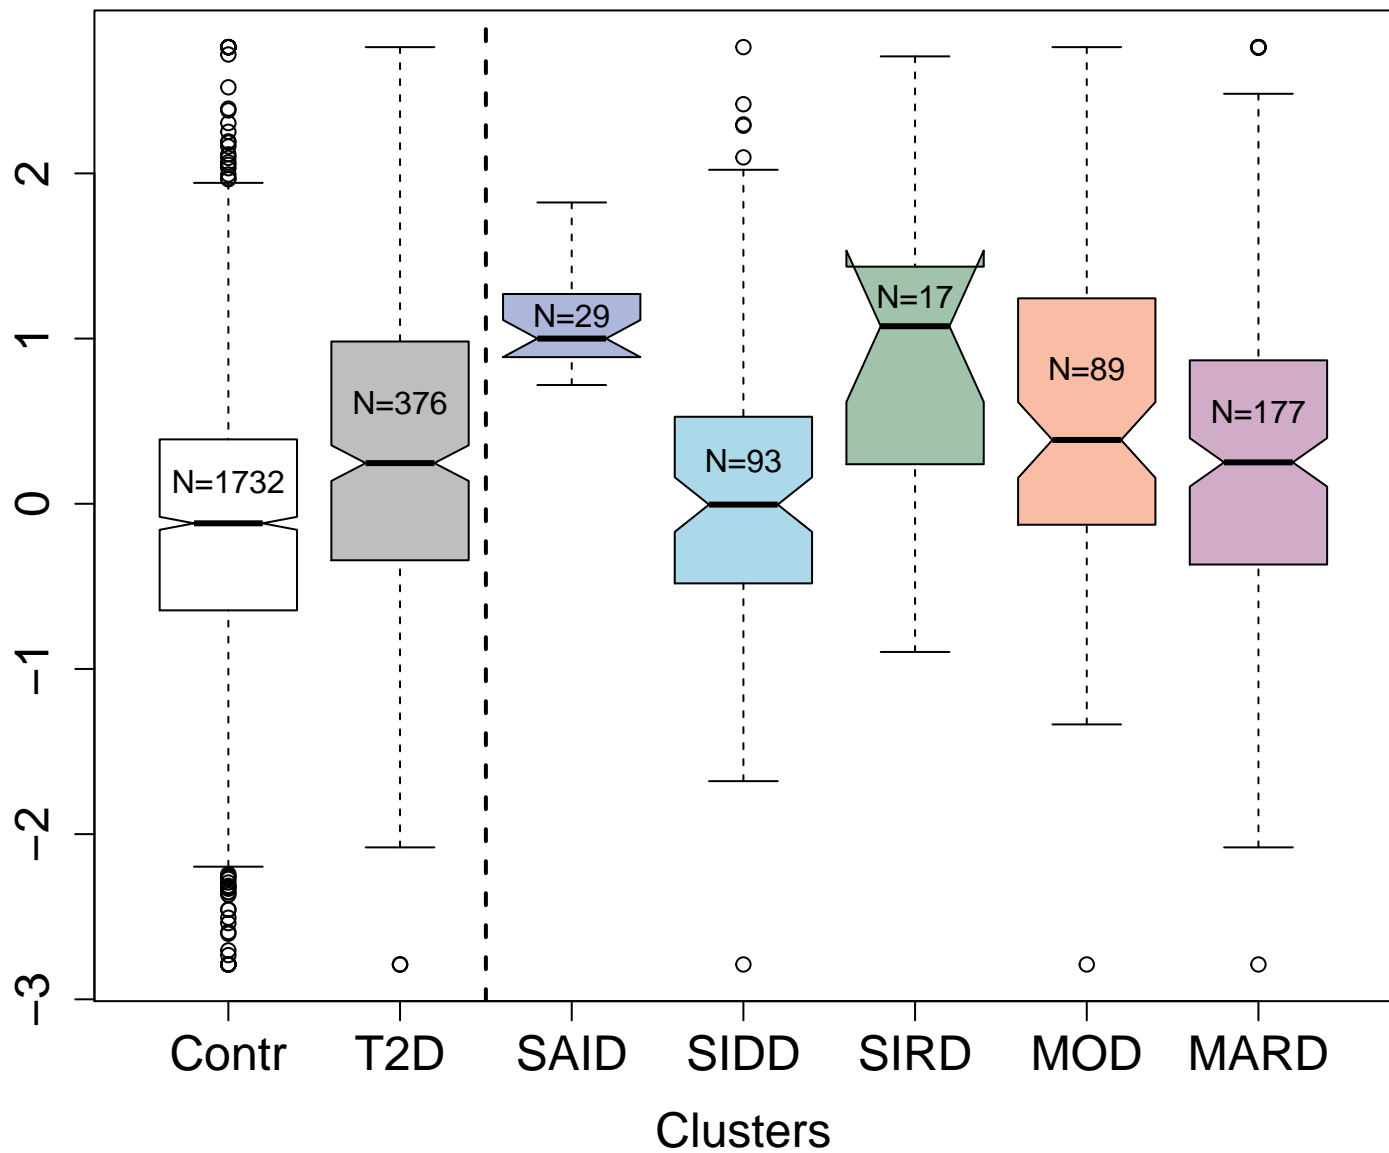

M43582 : 5-(galactosylhydroxy)-L-lysine

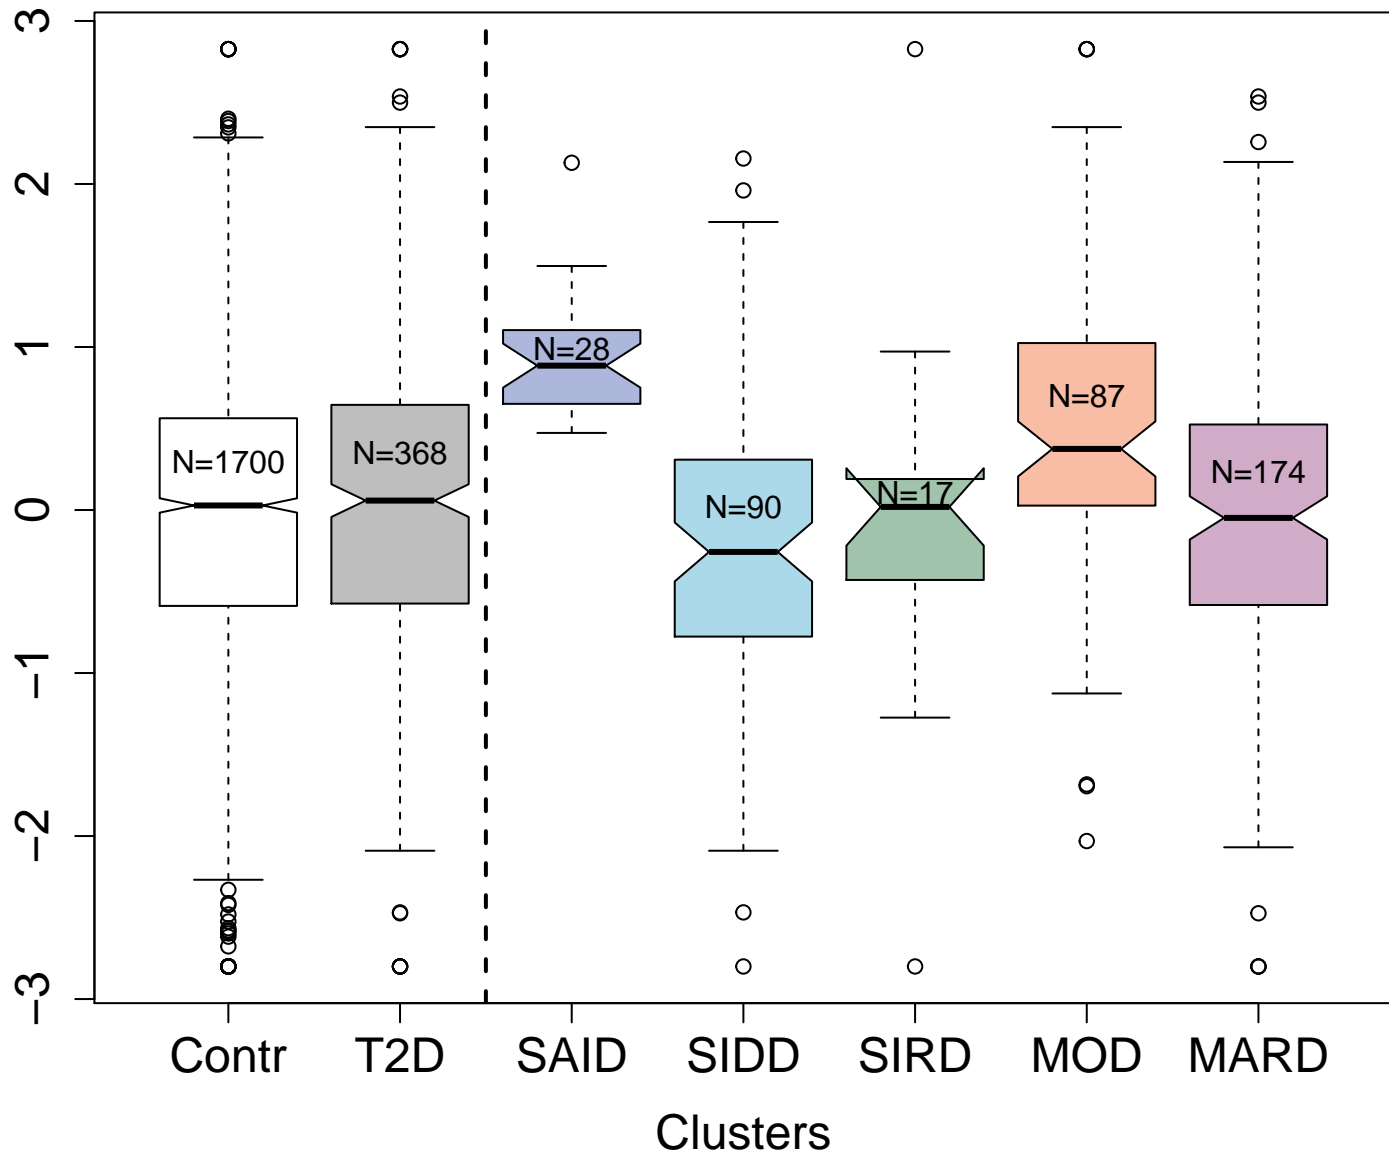

M35132 : 3-methylcytidine

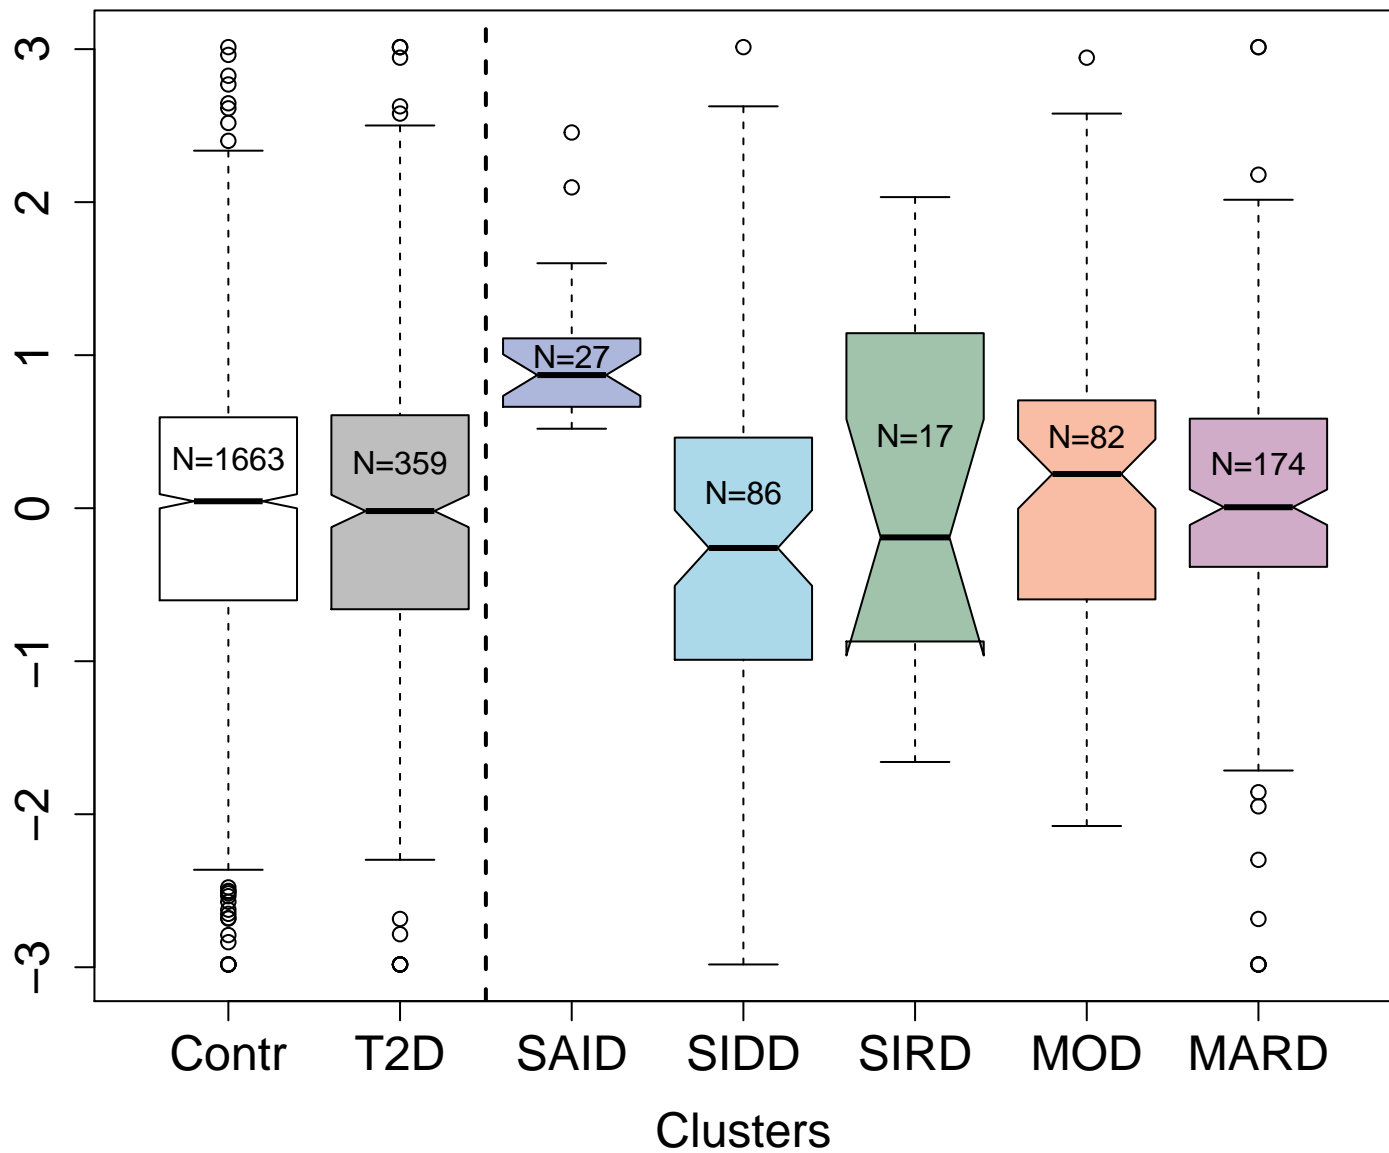



M57687 : N,N,N-trimethyl-5-aminovalerate

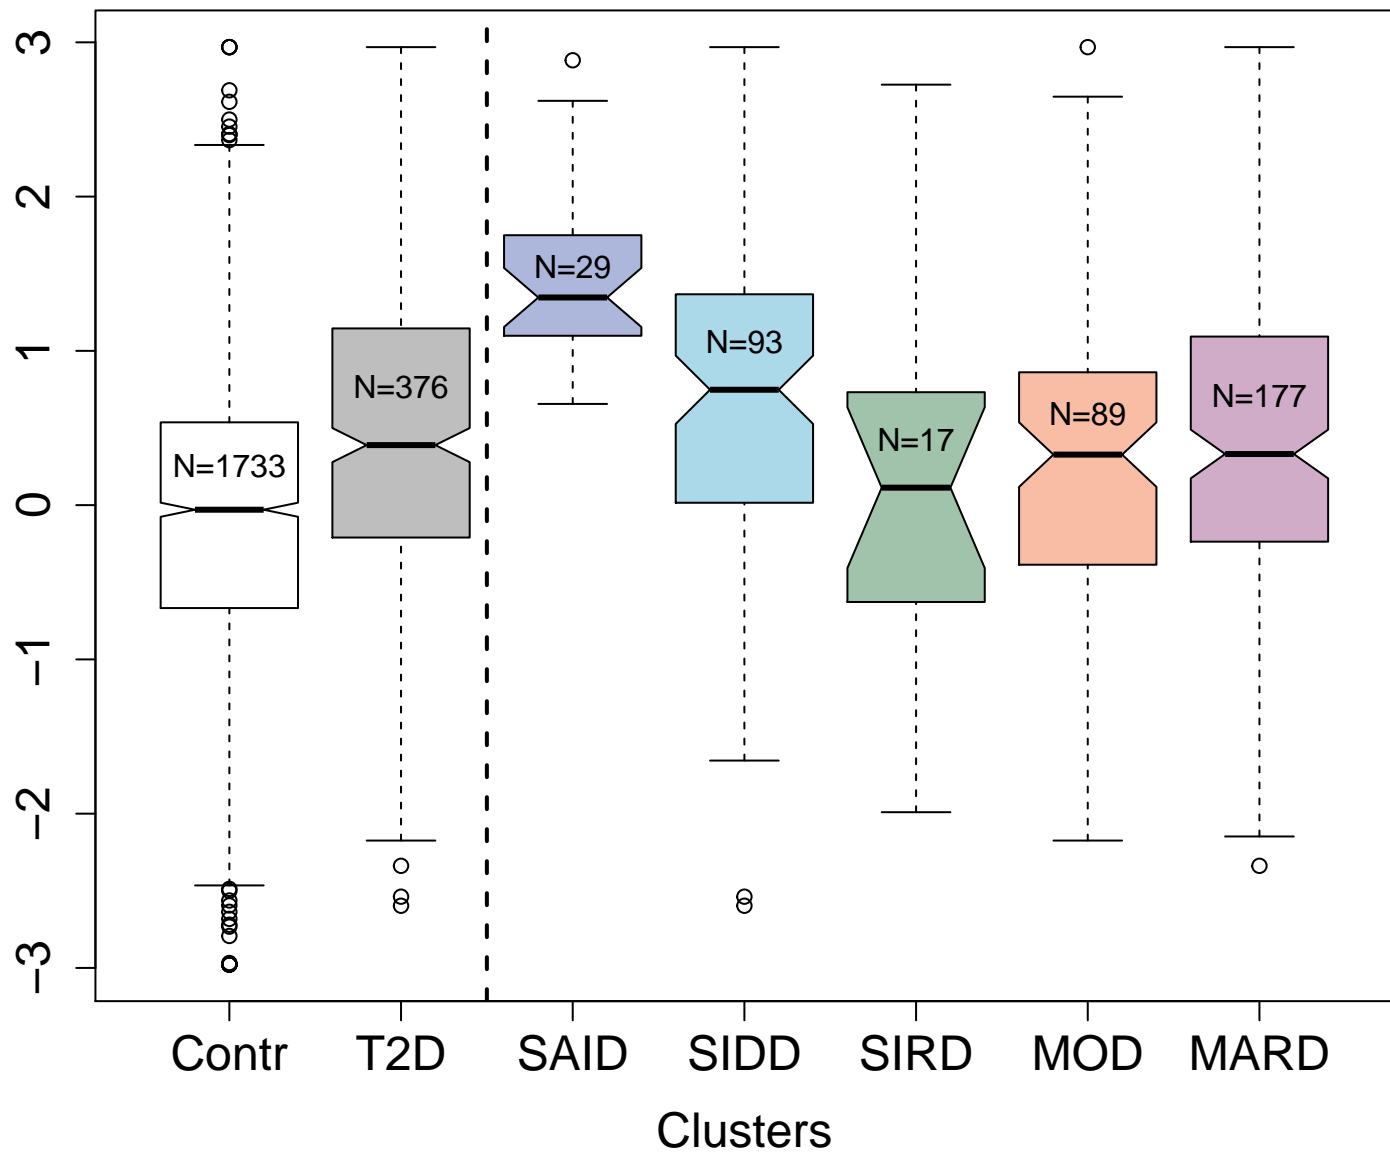

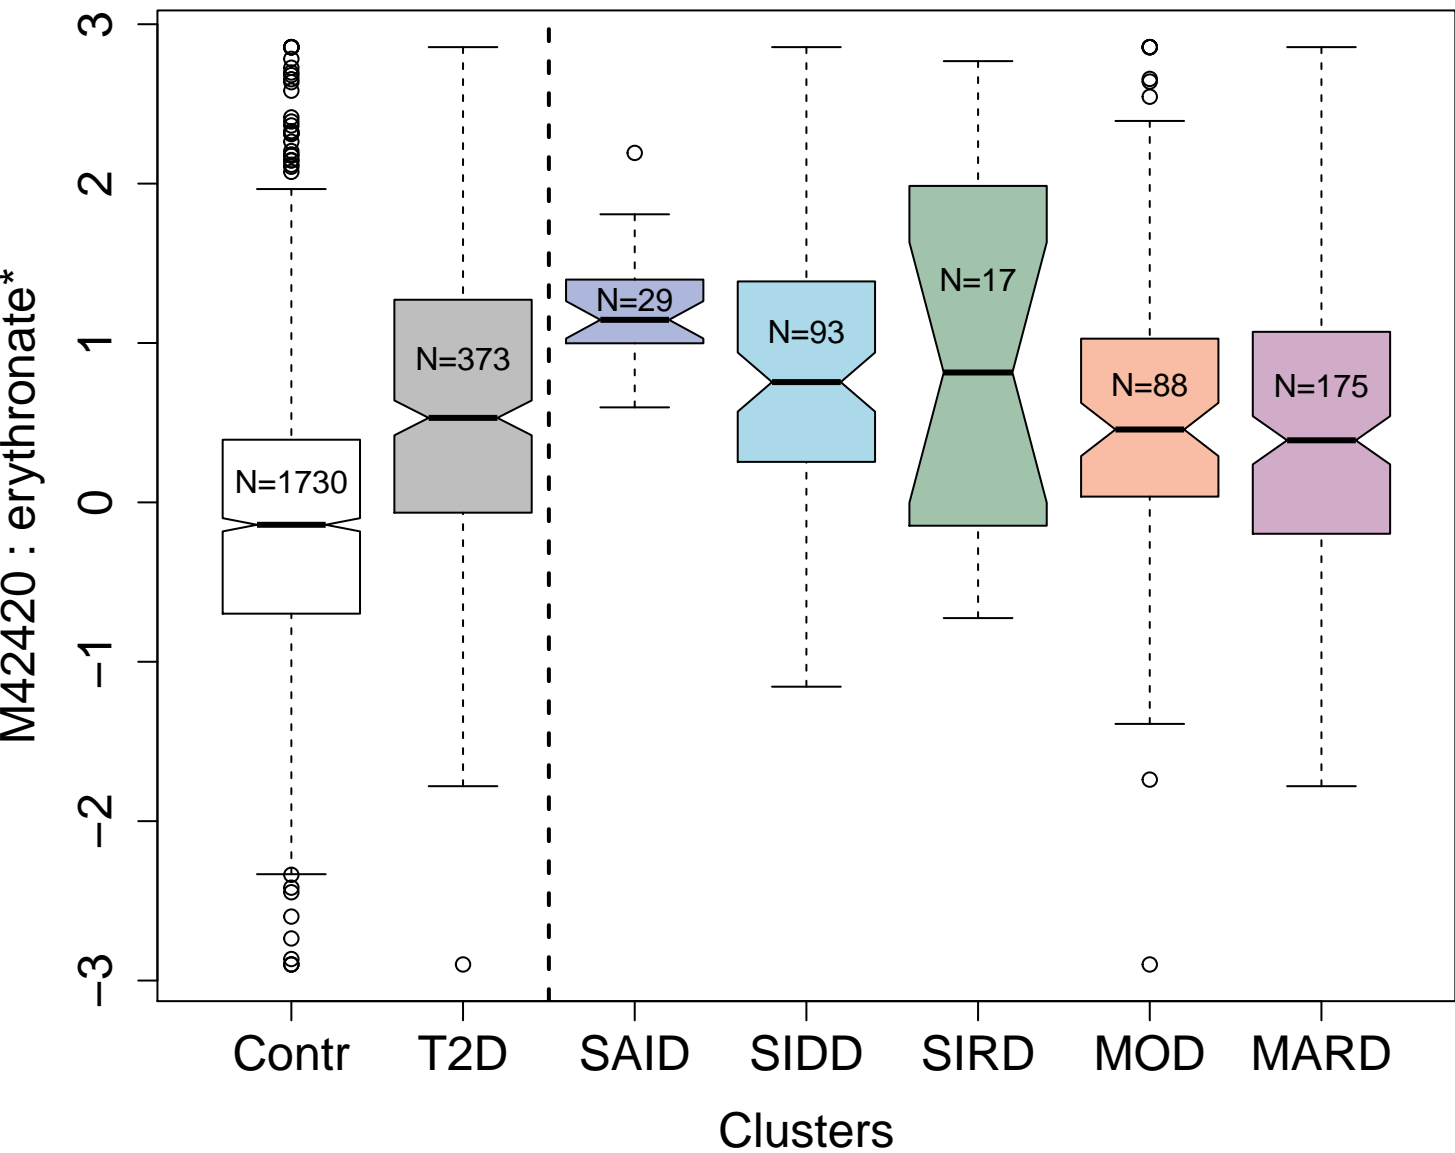

M46398 : X - 21353

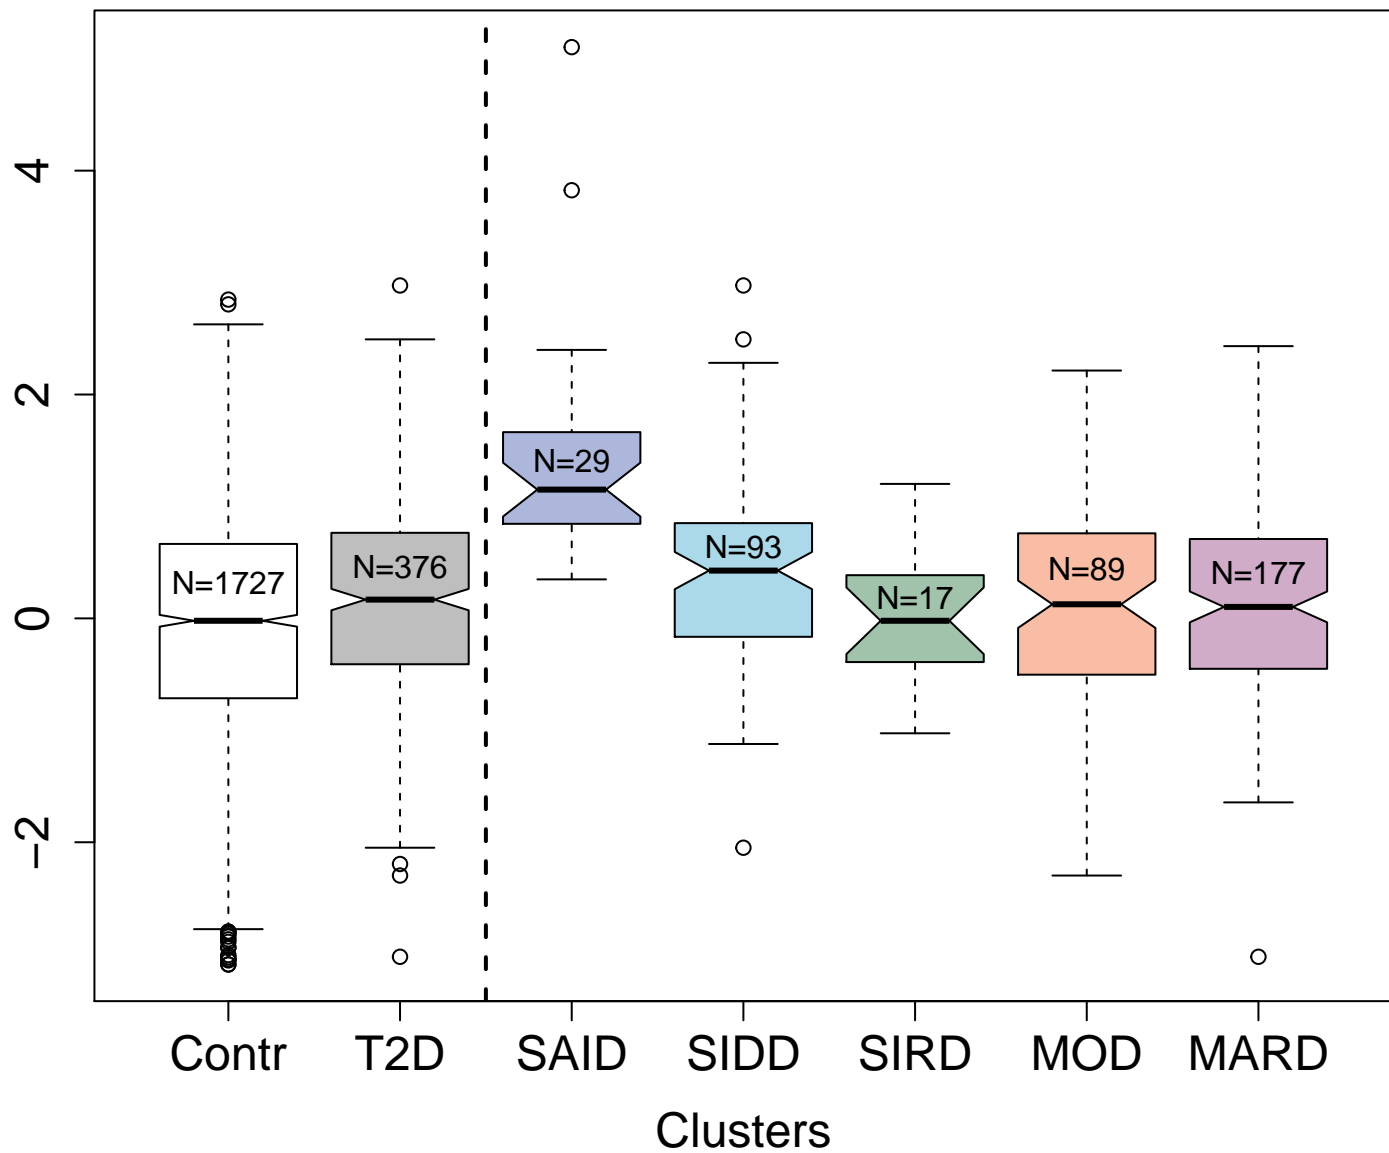

M44656 : isovalerate (i5:0)

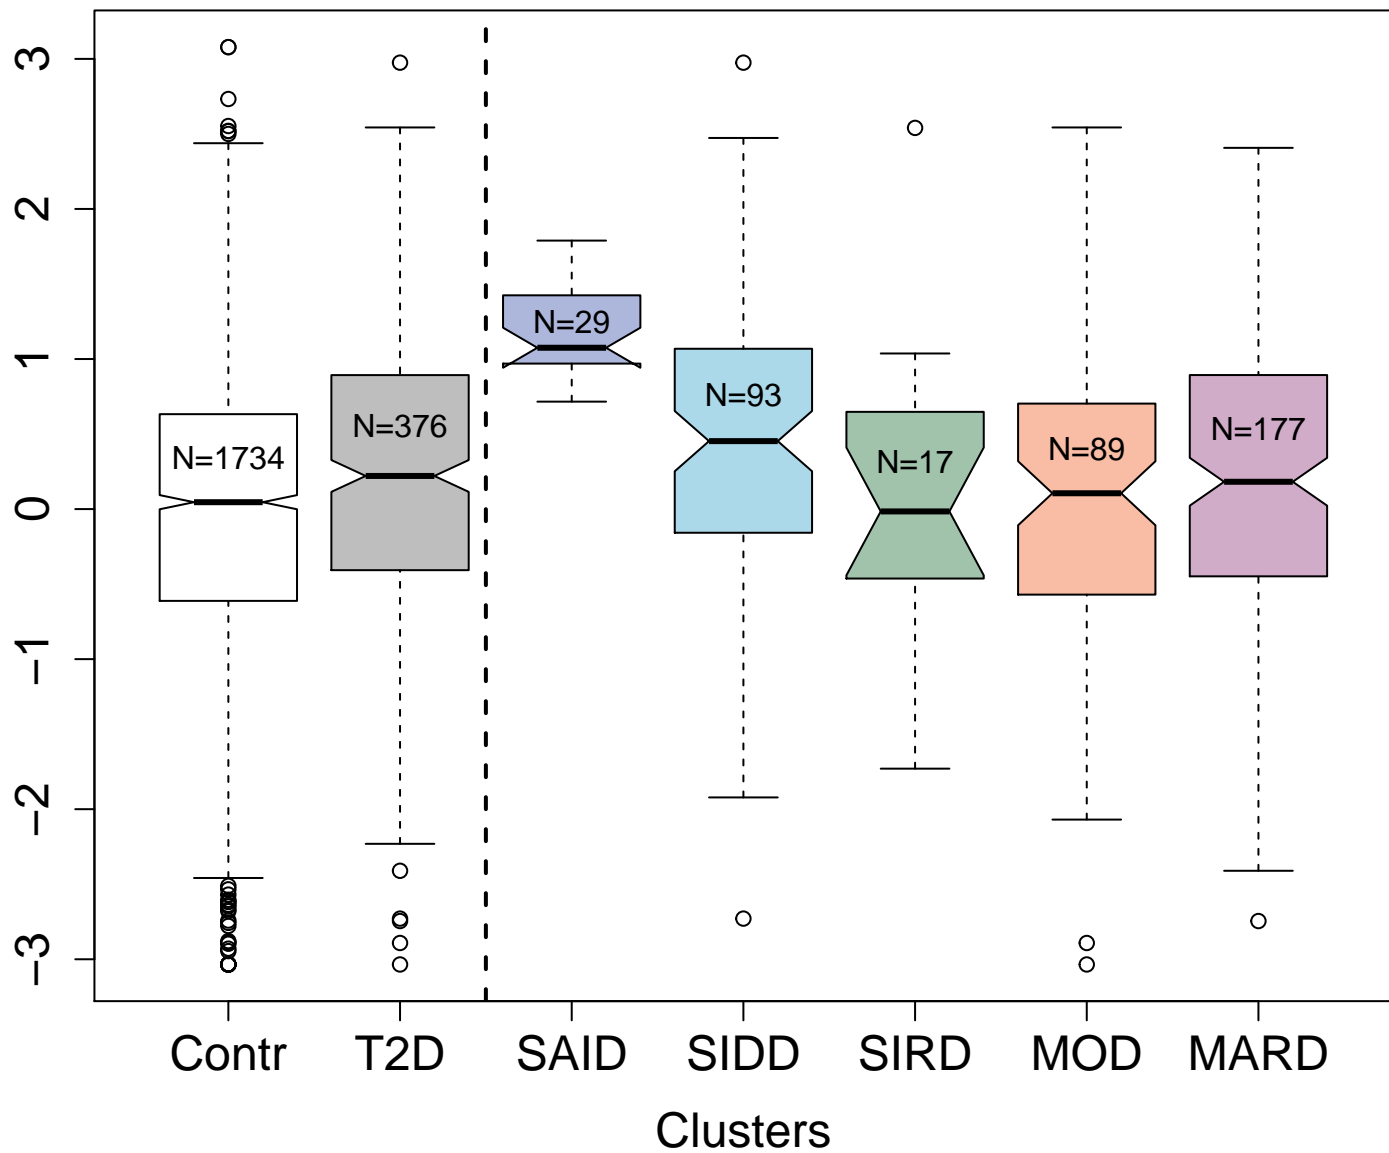

M17747 : sphingosine

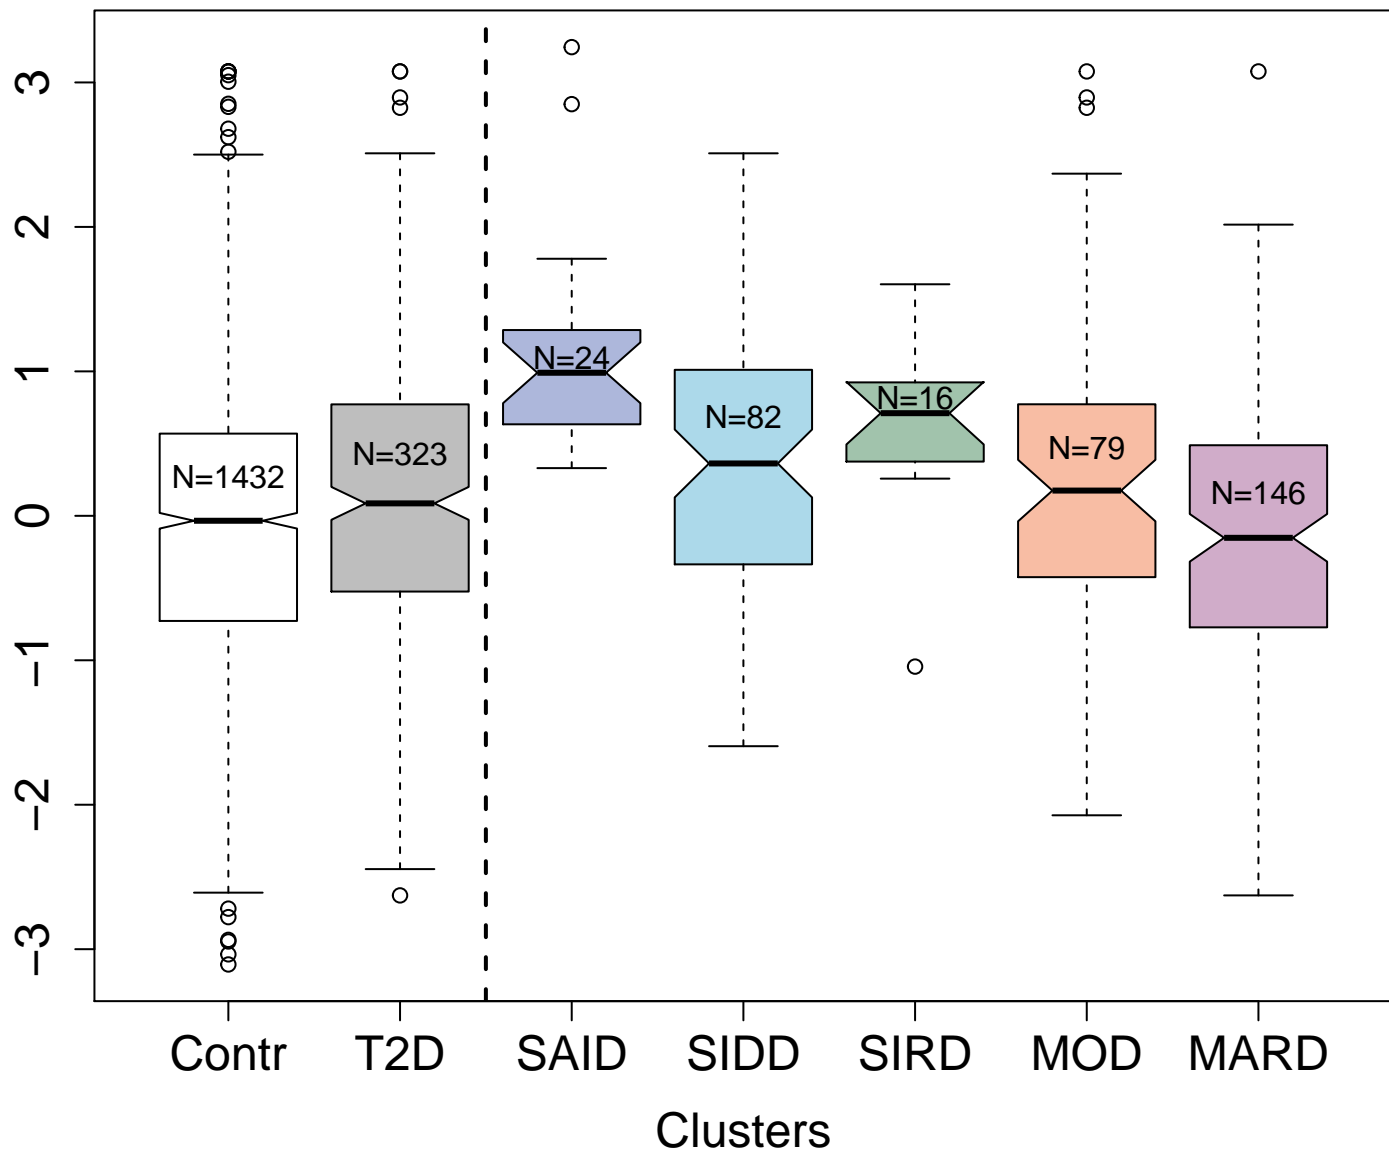

M30460 : 1-methylhistidine

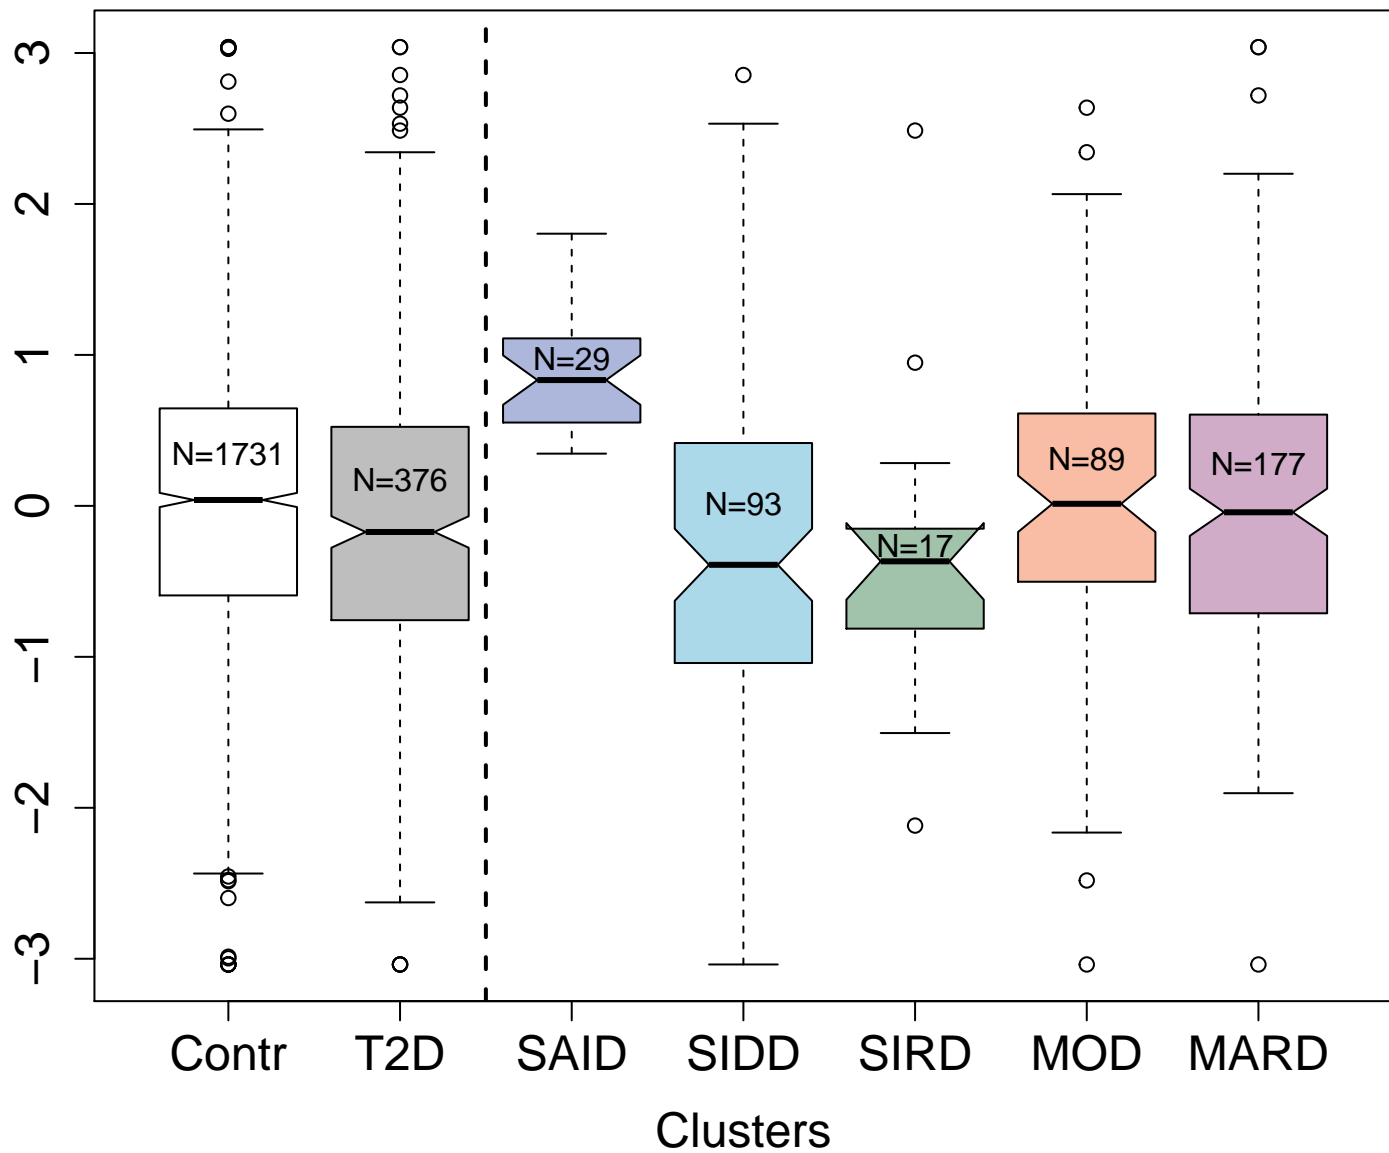

M35114 : 7-methylguanine

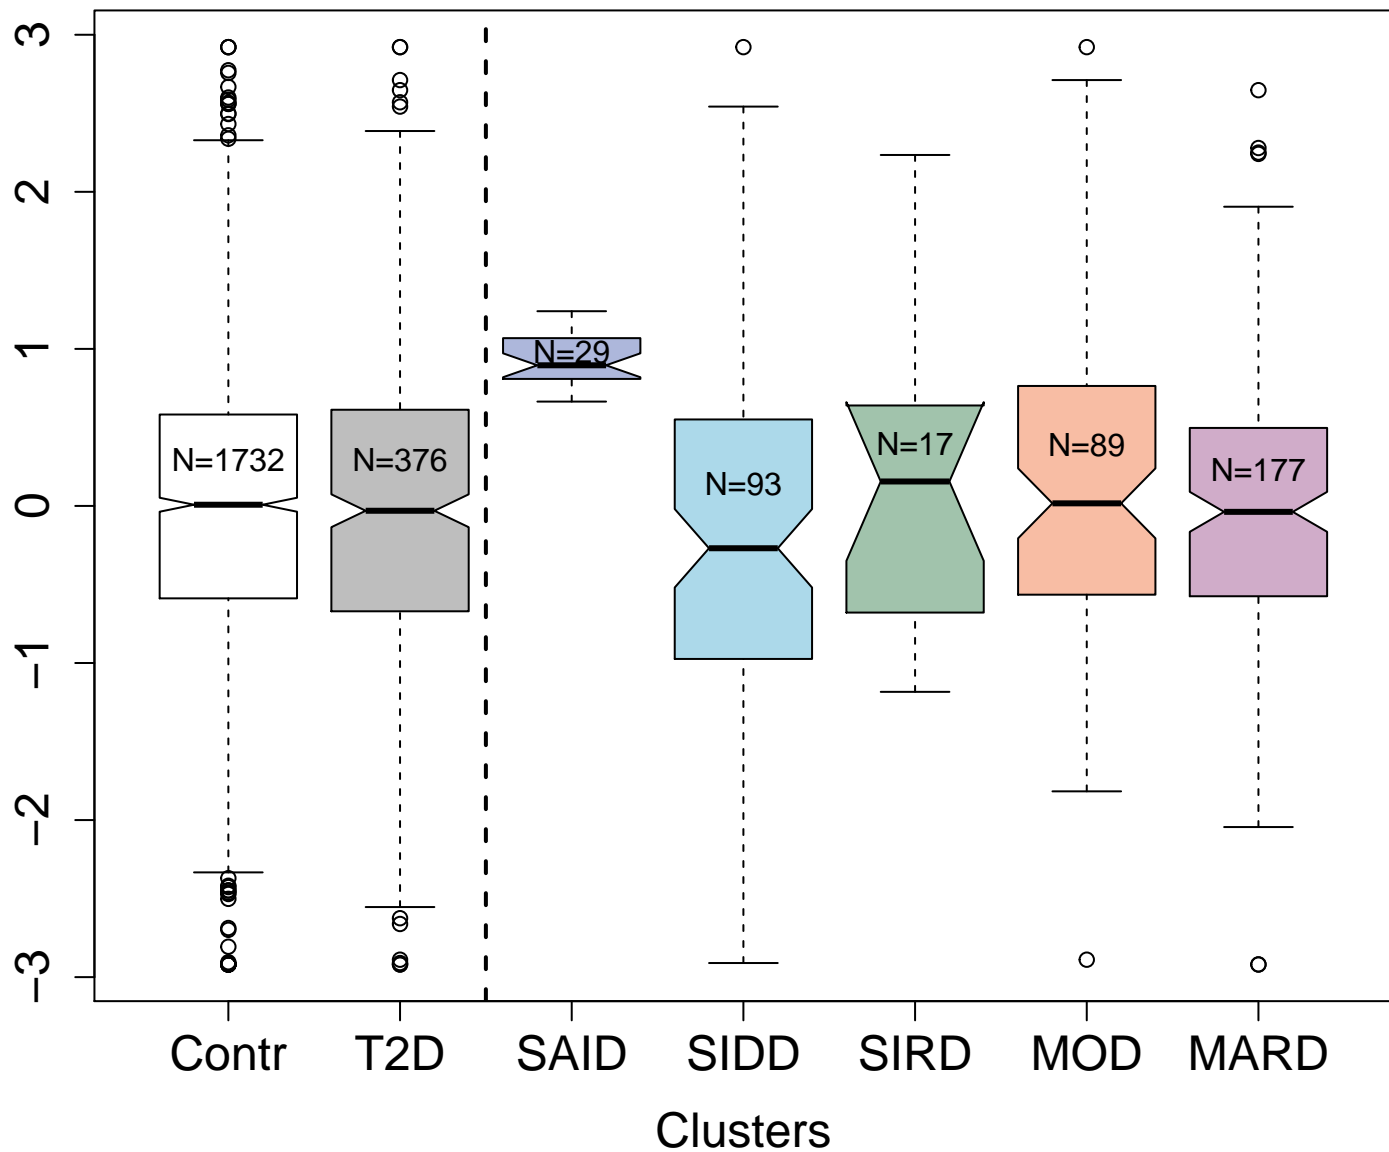

M61887 : glucuronide of C10H18O2 (7)\*

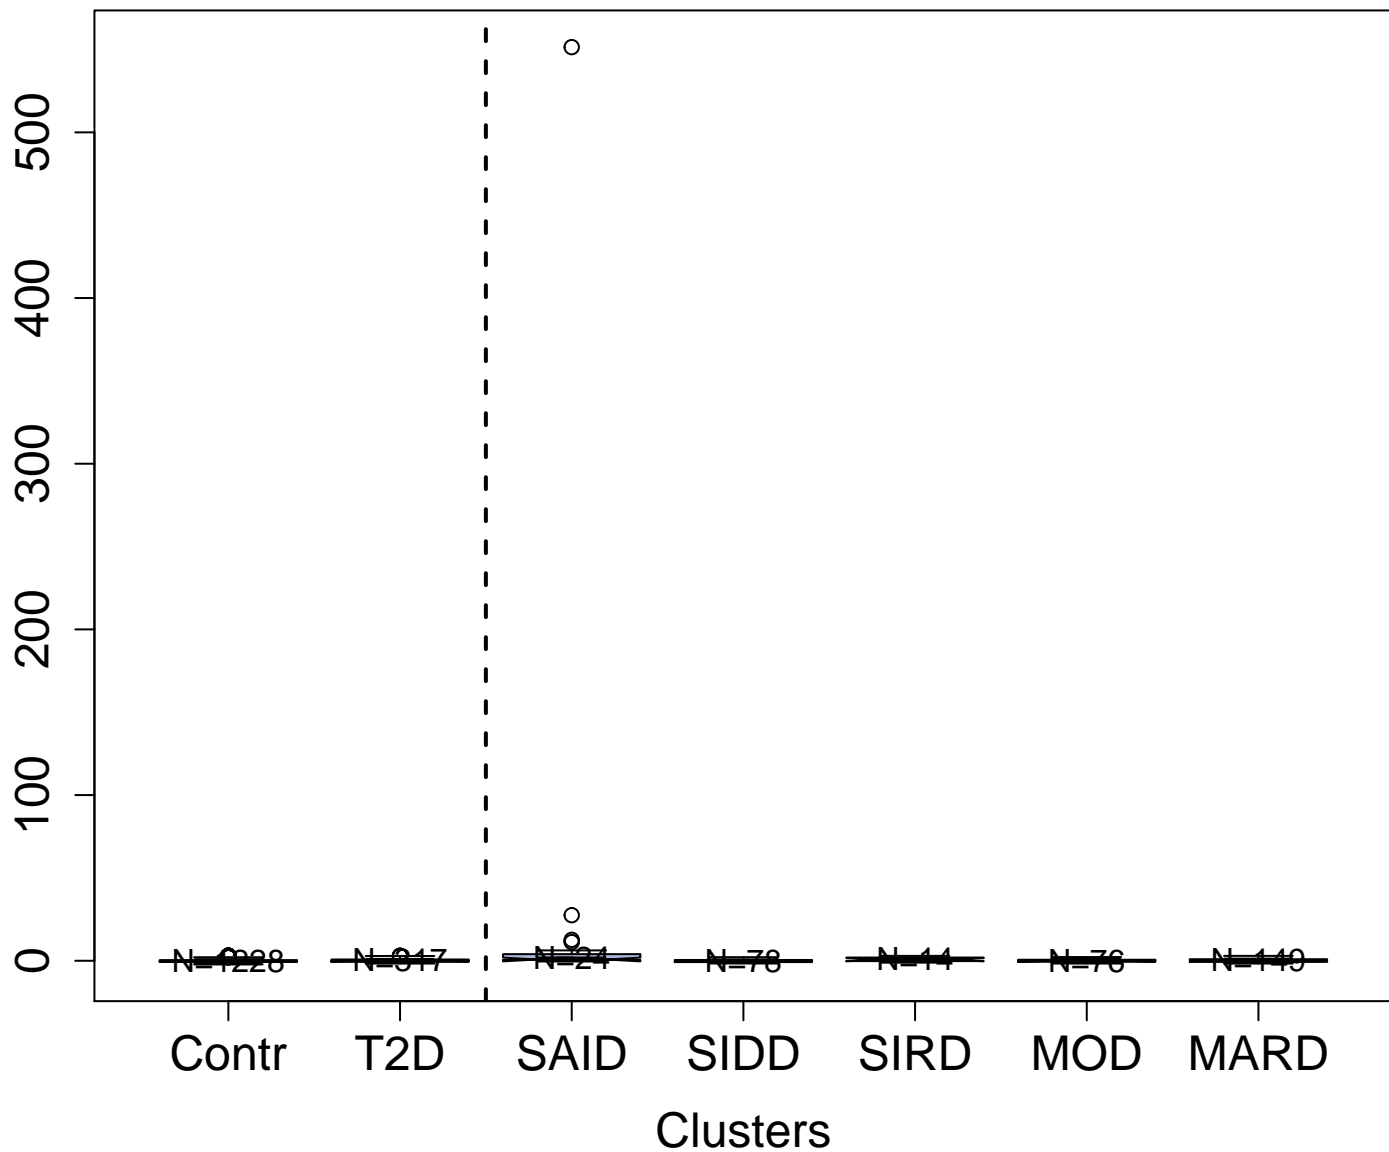



M48047 : X - 18886

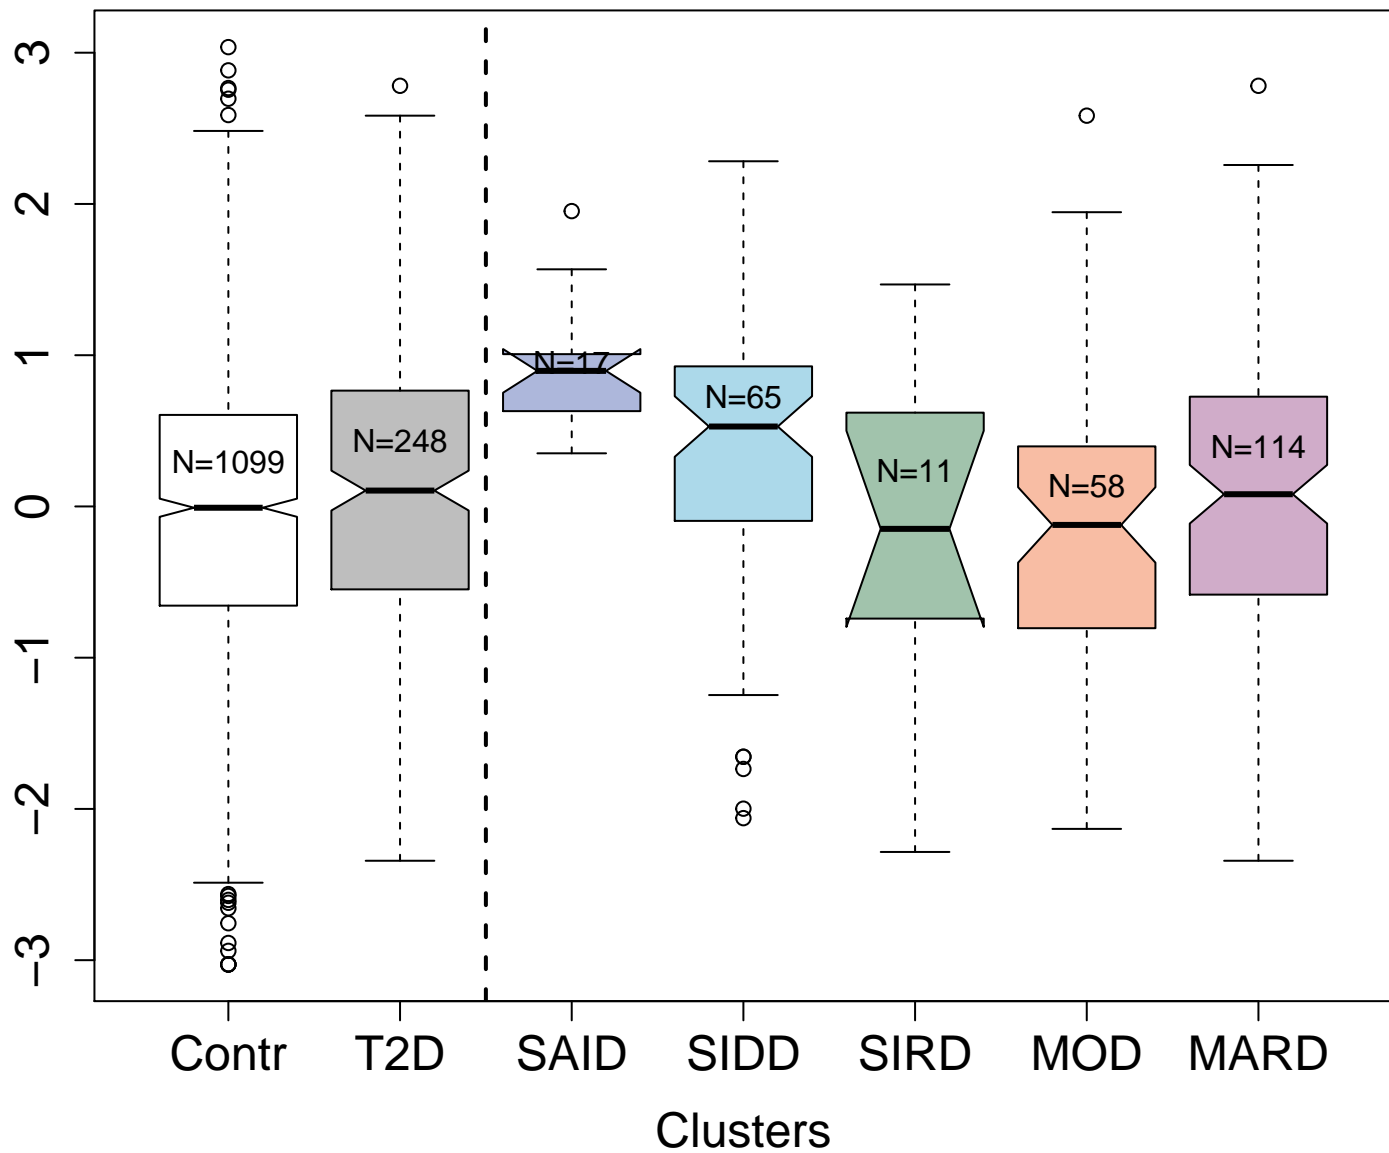

M53263 : docosahexaenoylcholine

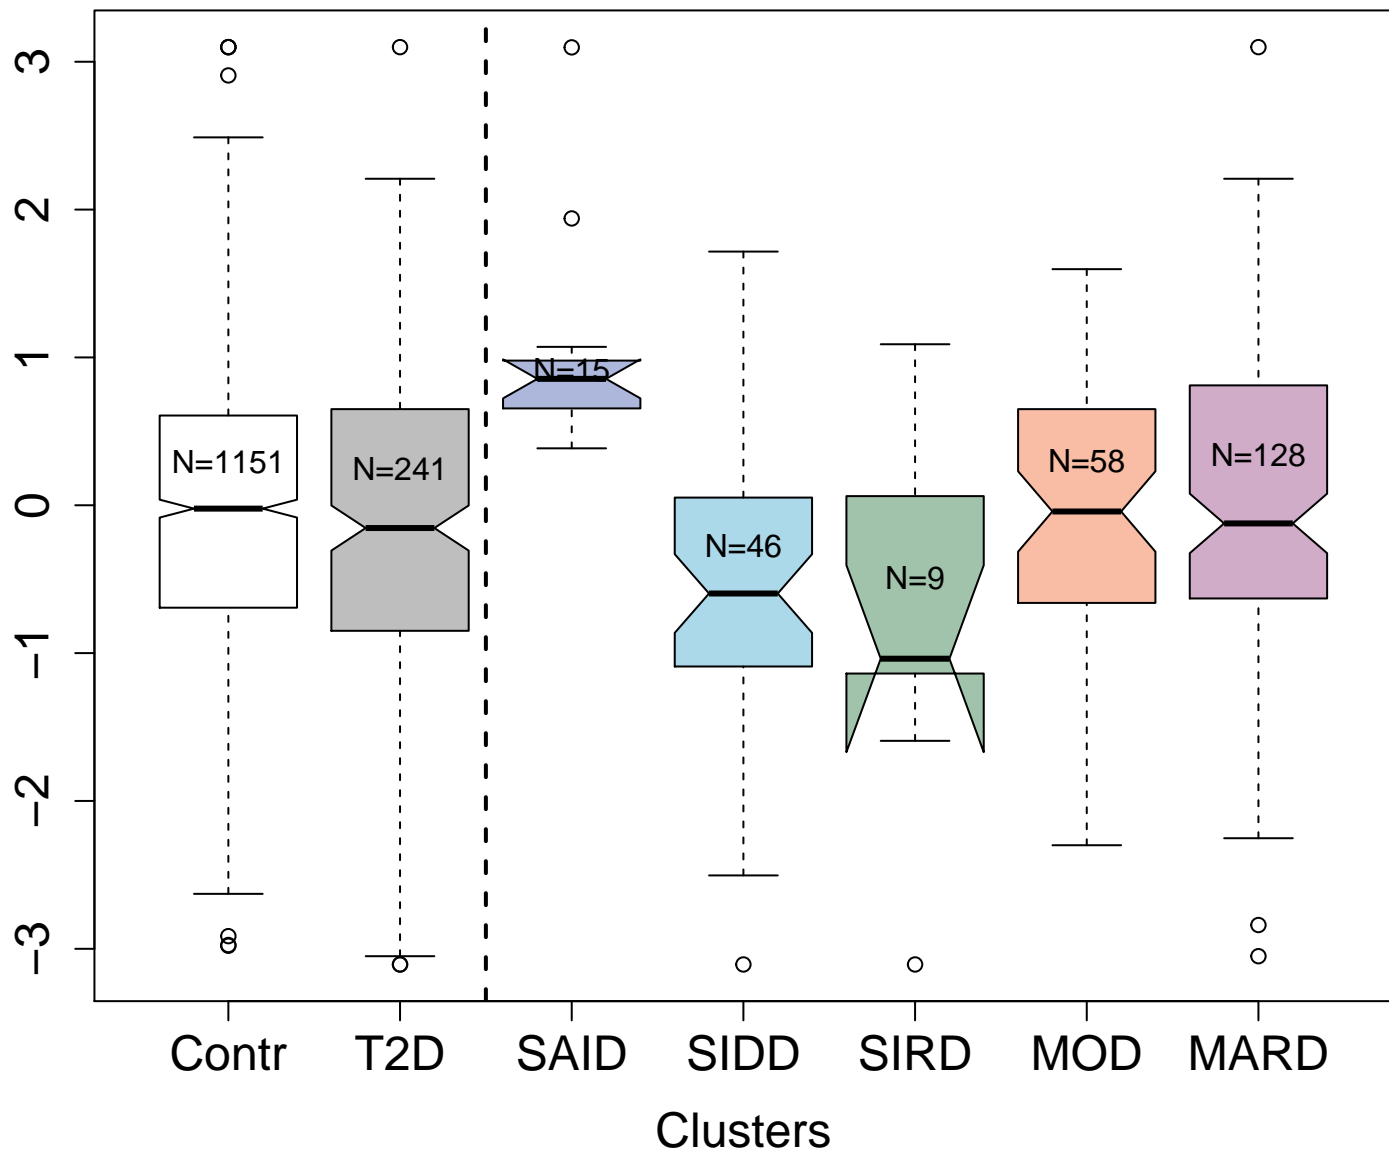

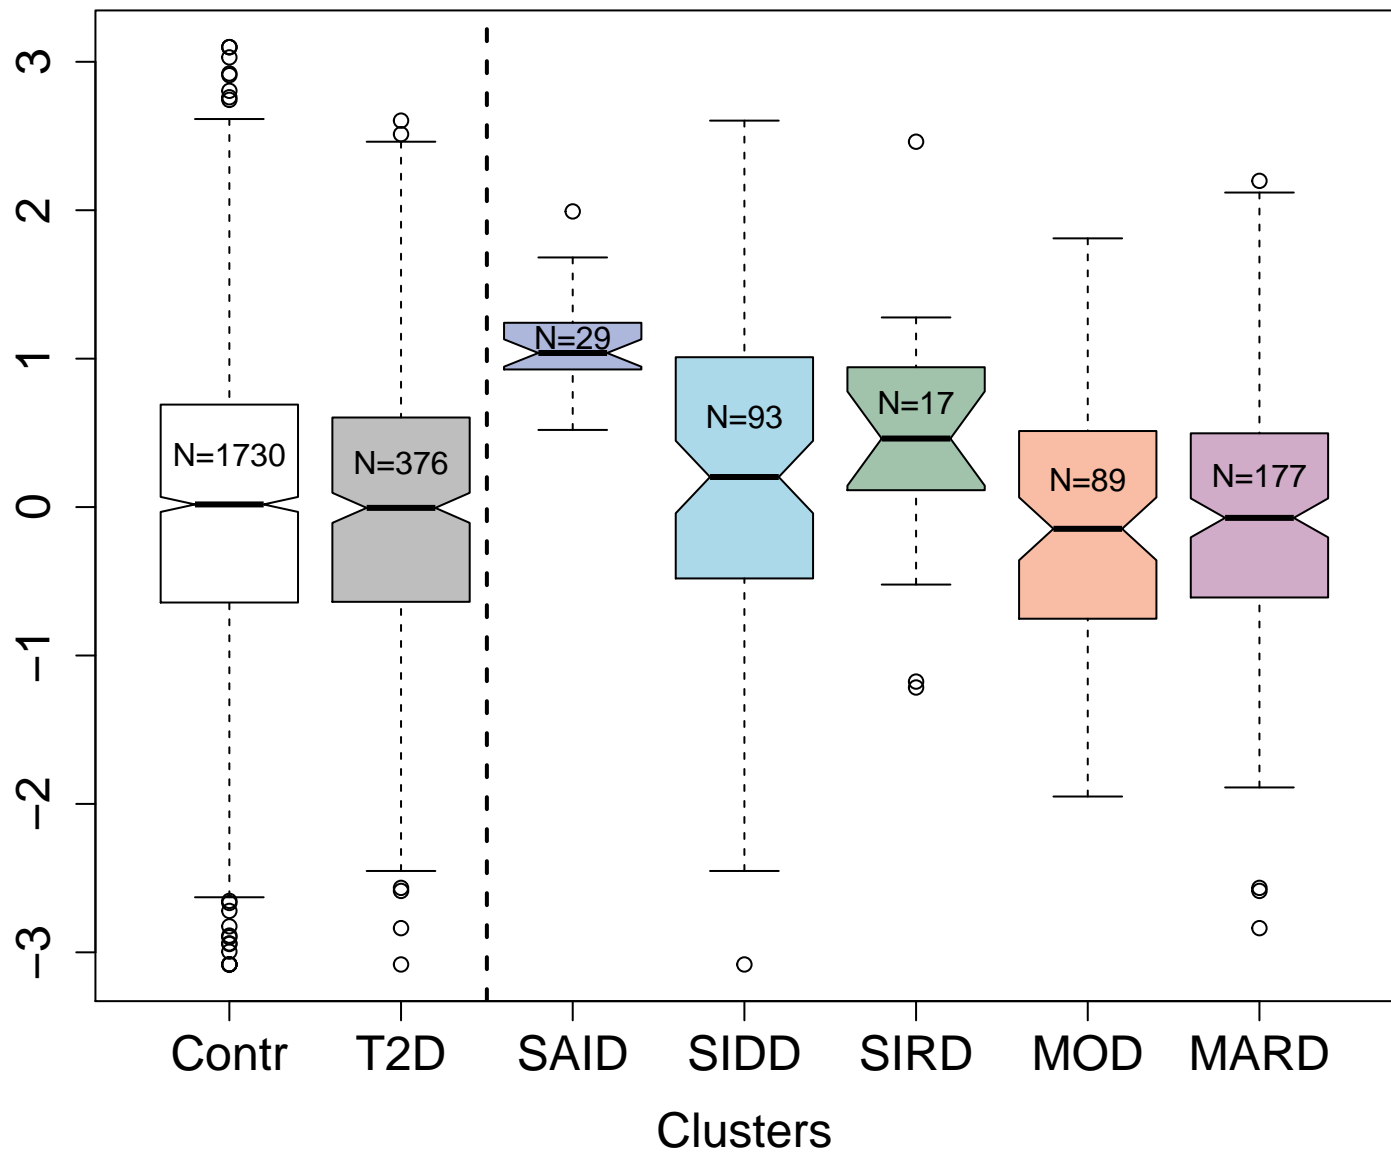

M46685 : X - 16964

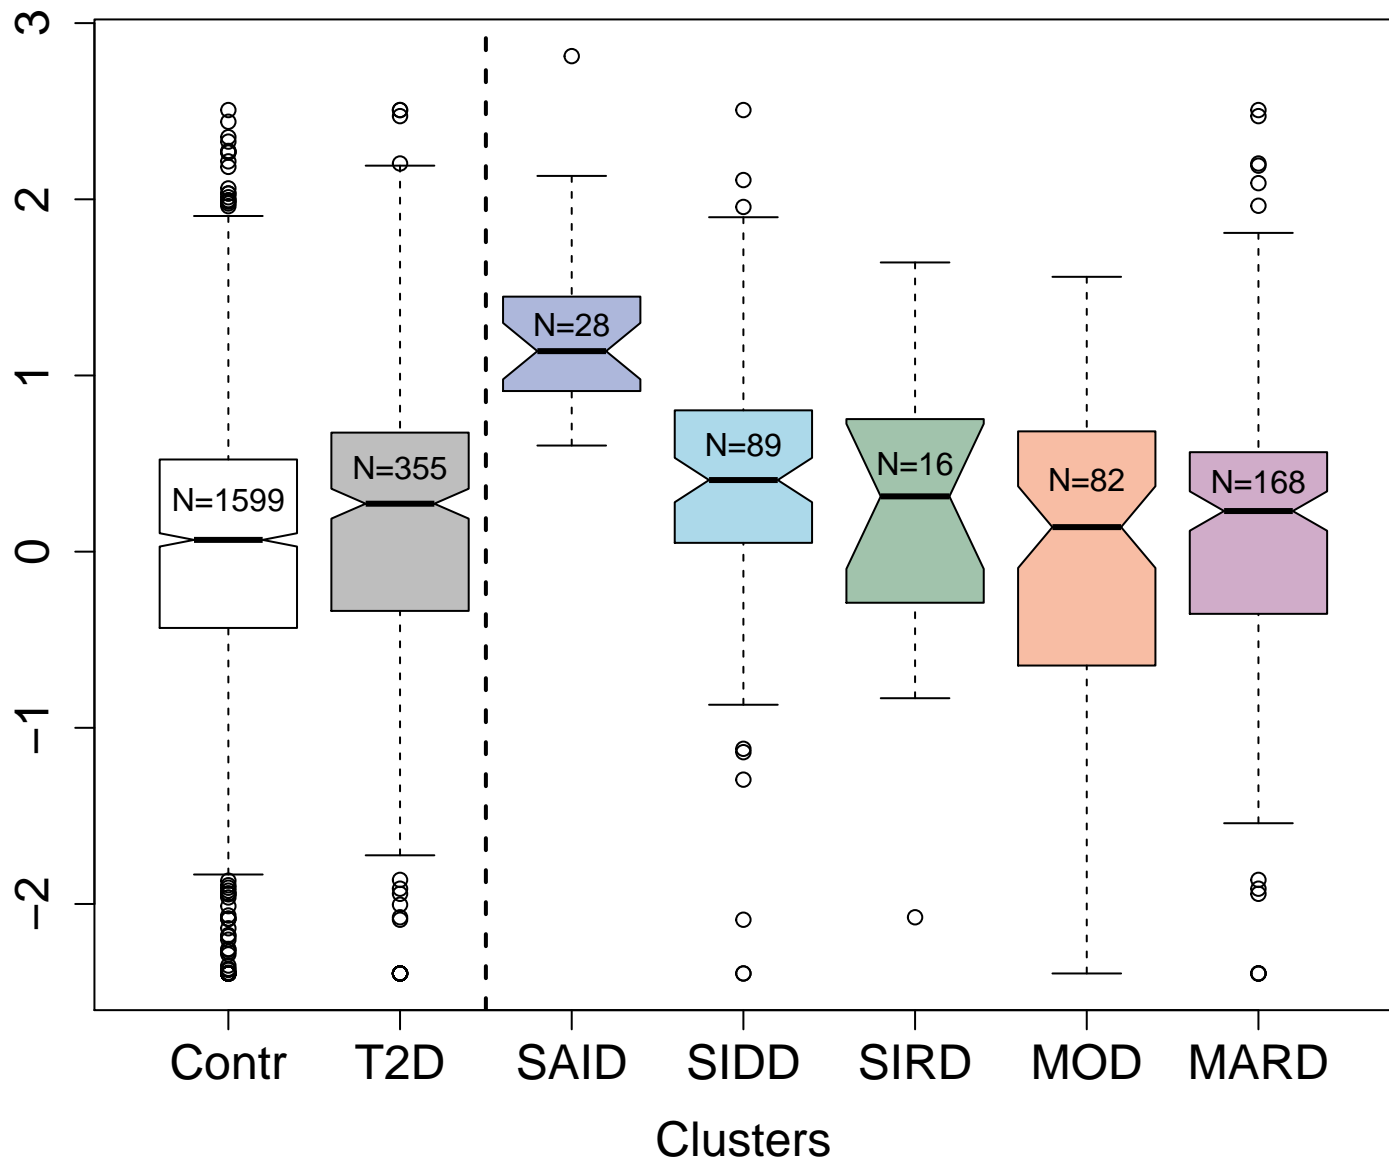

M35669 : tetradecanedioate (C14-DC)

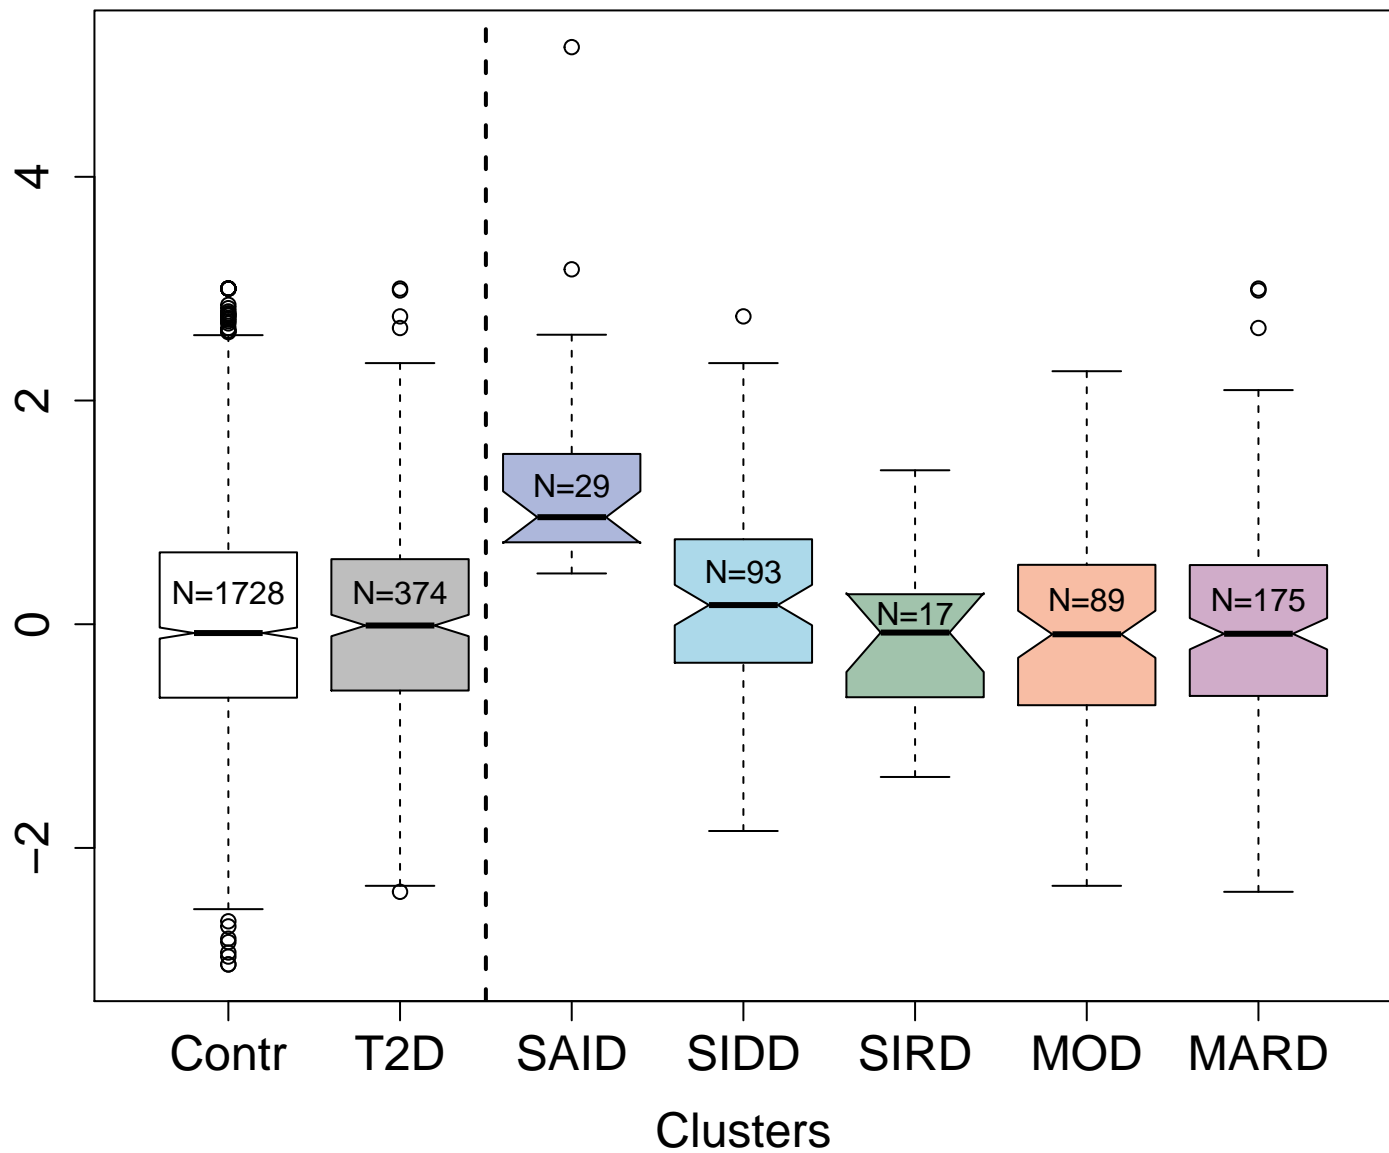

M33587 : eicosenoate (20:1)

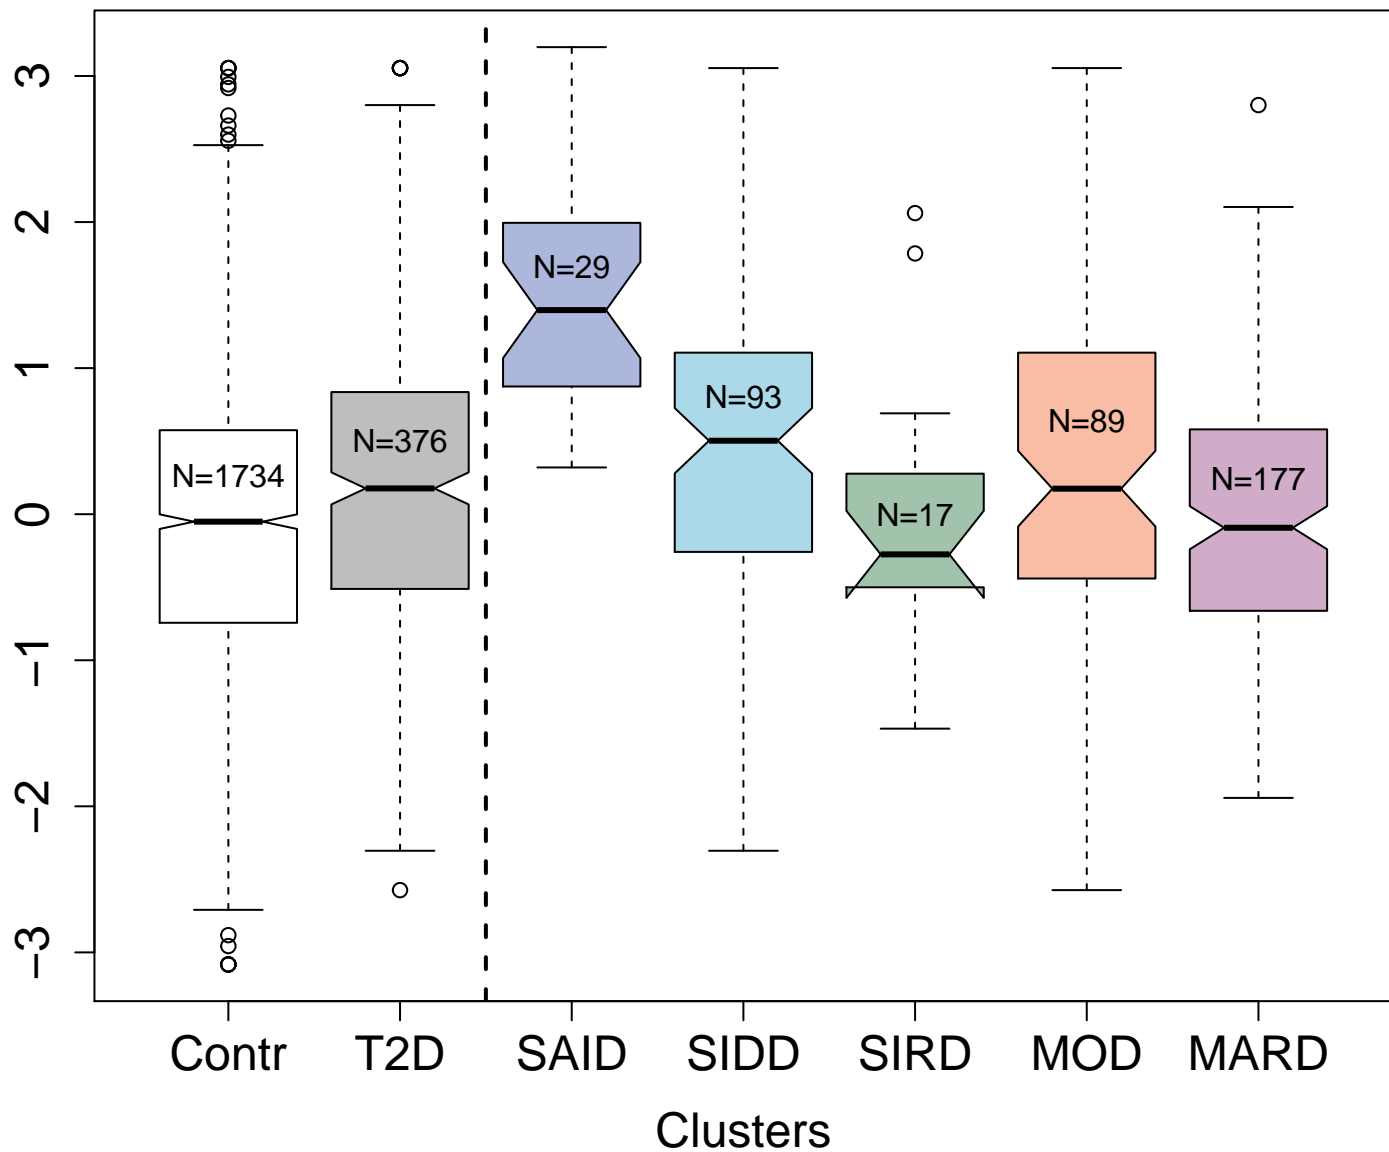

M1444 : pipecolate

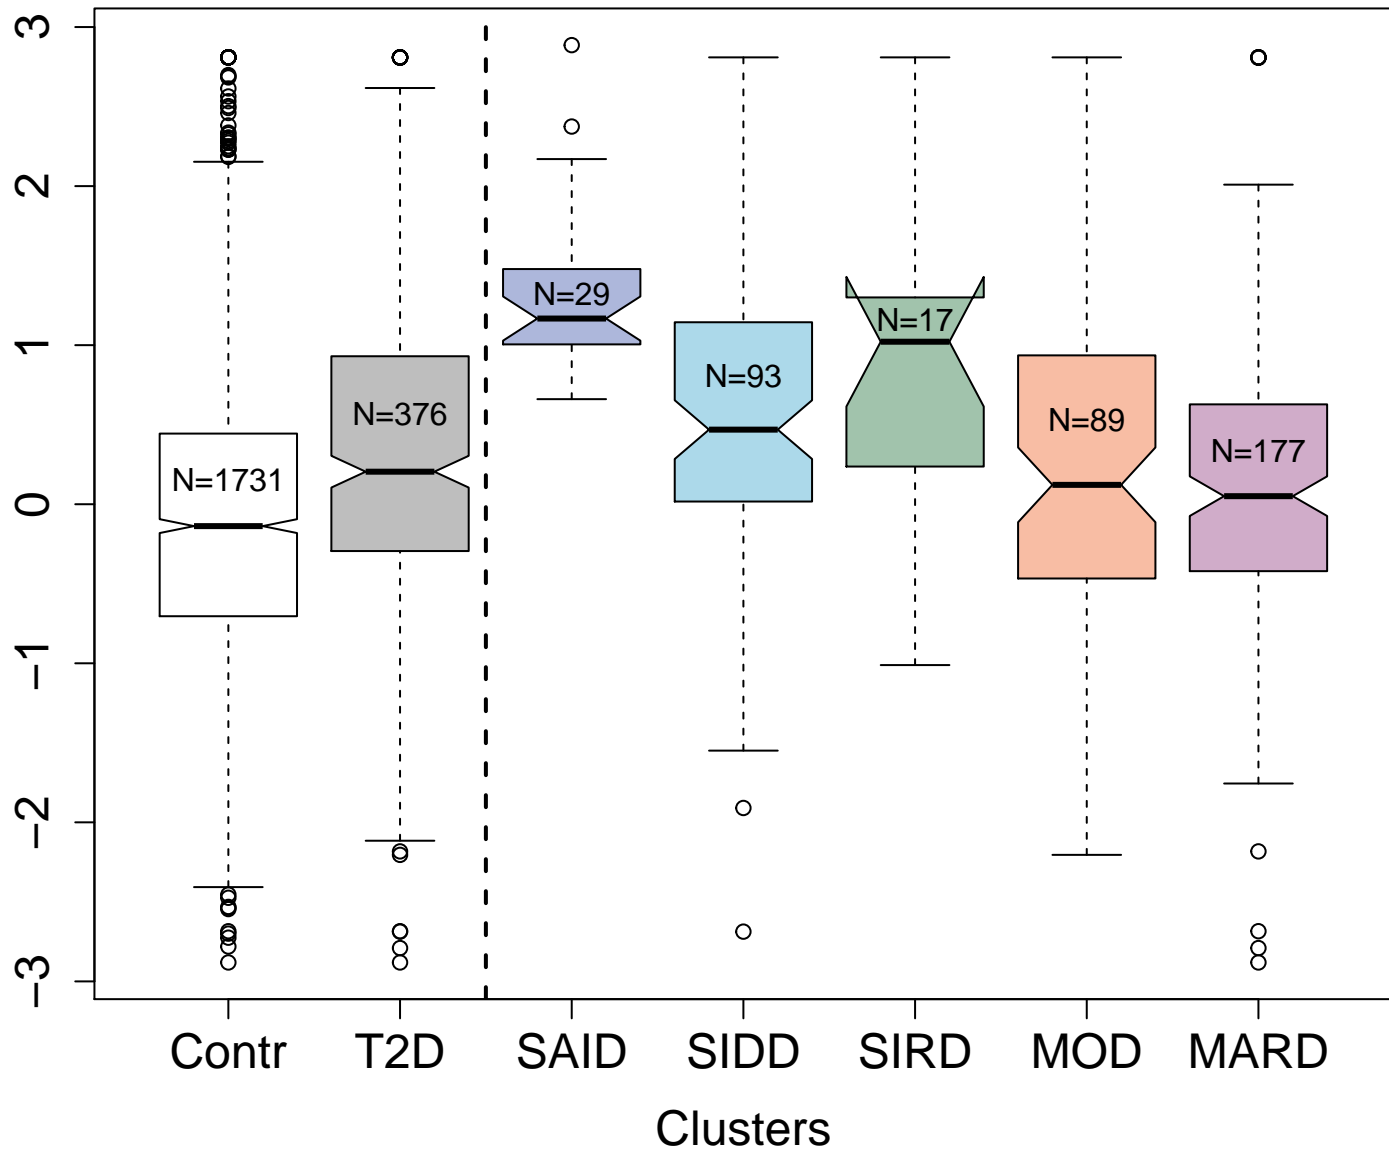

M57474 : sphingomyelin (d18:2/18:1)\*

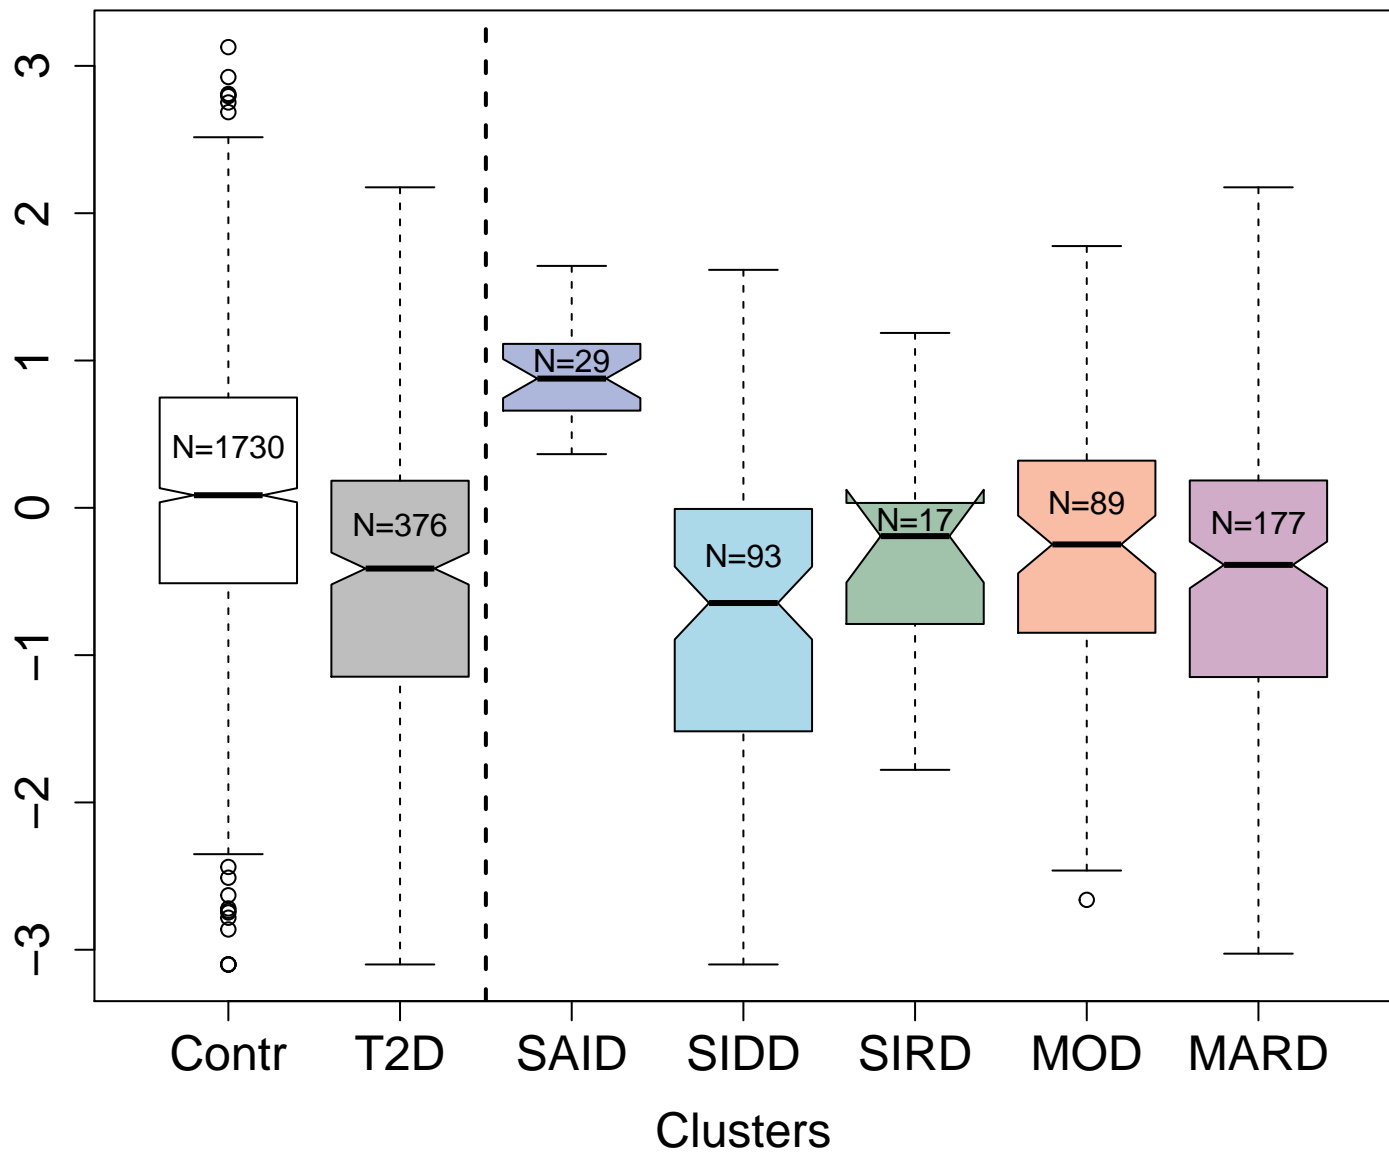



M46261 : X - 19438

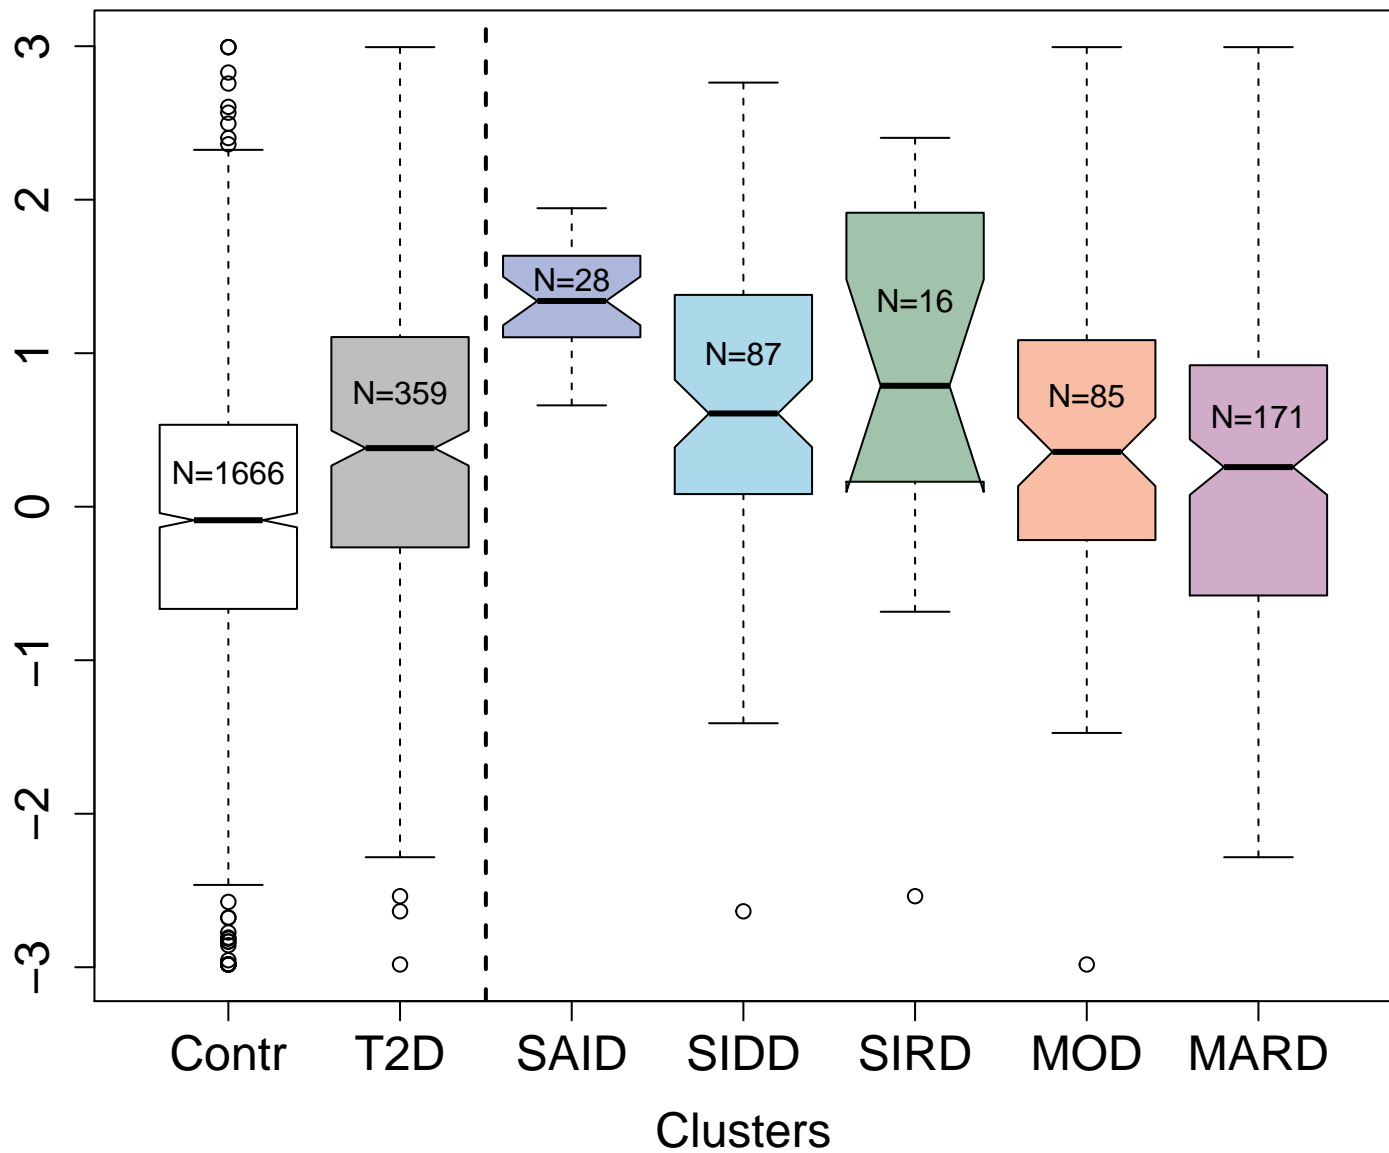

M33939 : N-acetylthreonine

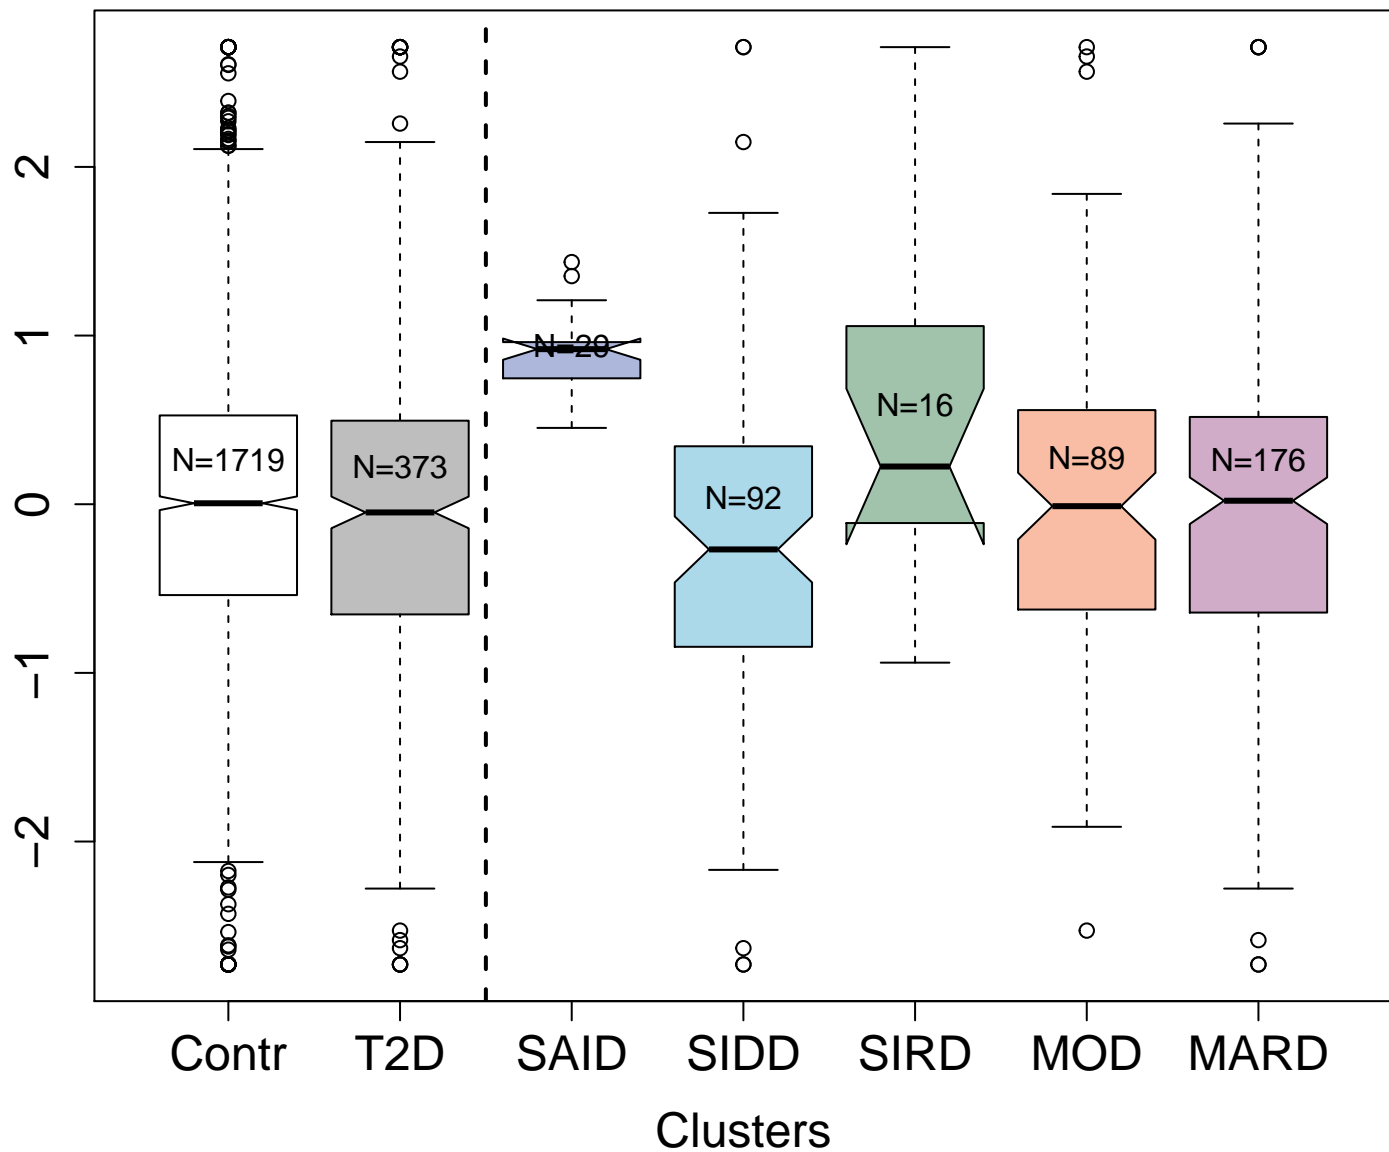

M36752 : N6-acetyllysine

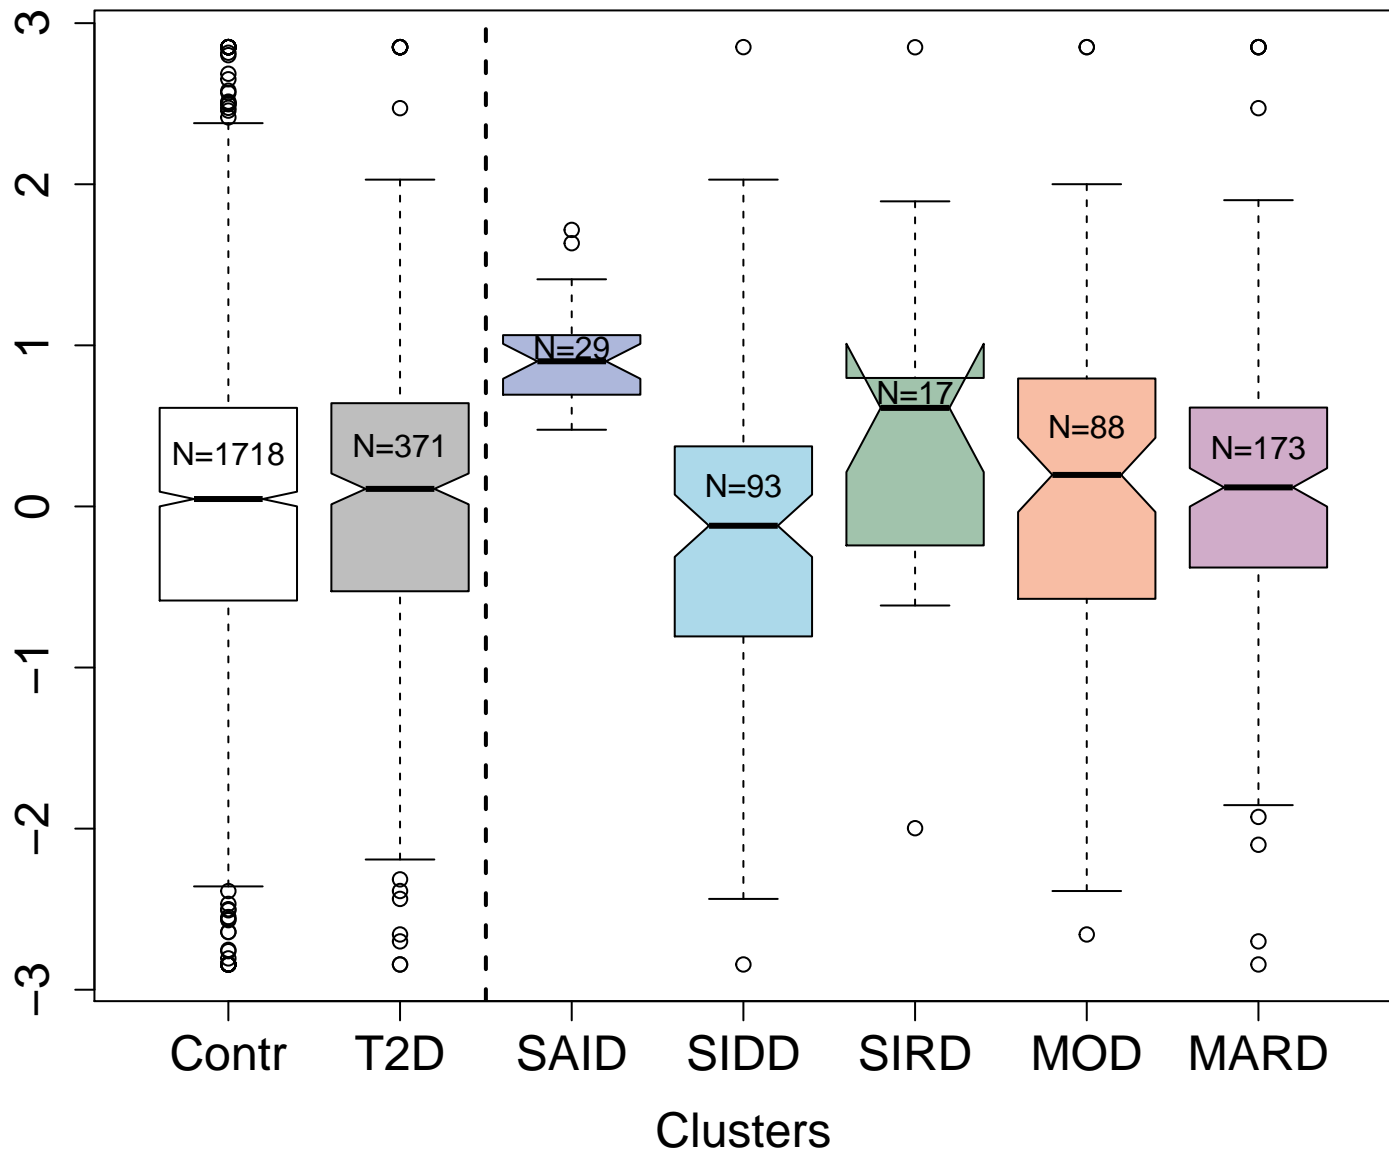

M57480 : sphingomyelin (d18:2/21:0, d16:2/23:0)\*

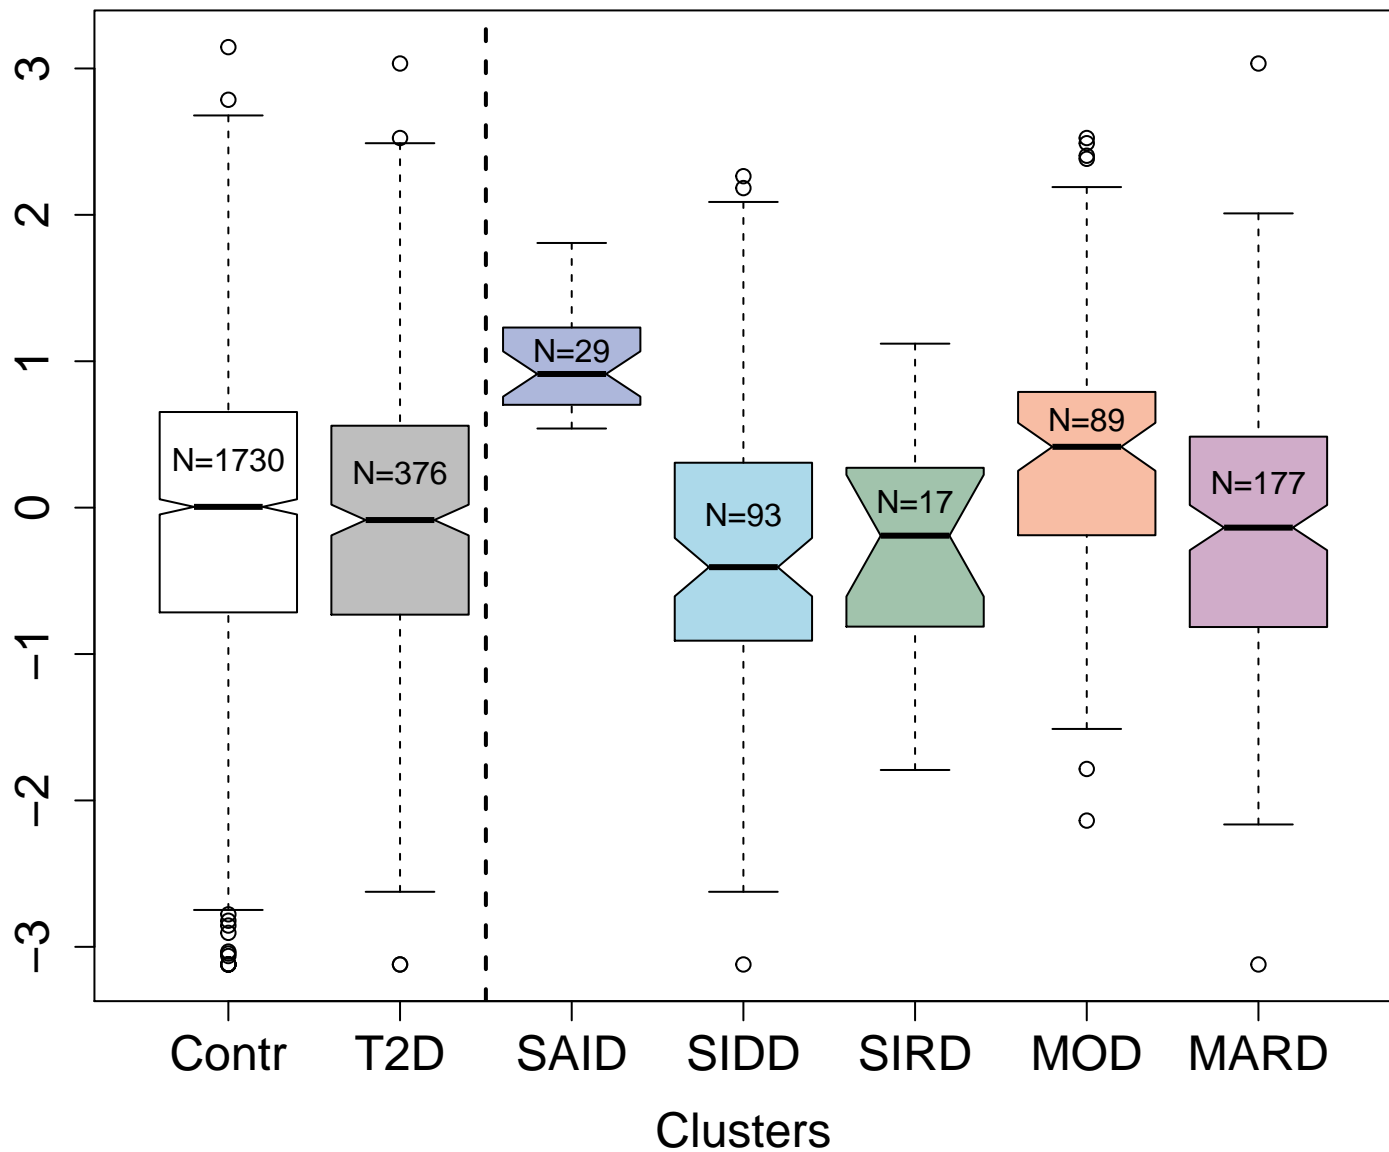

M54907 : hexanoylglutamine

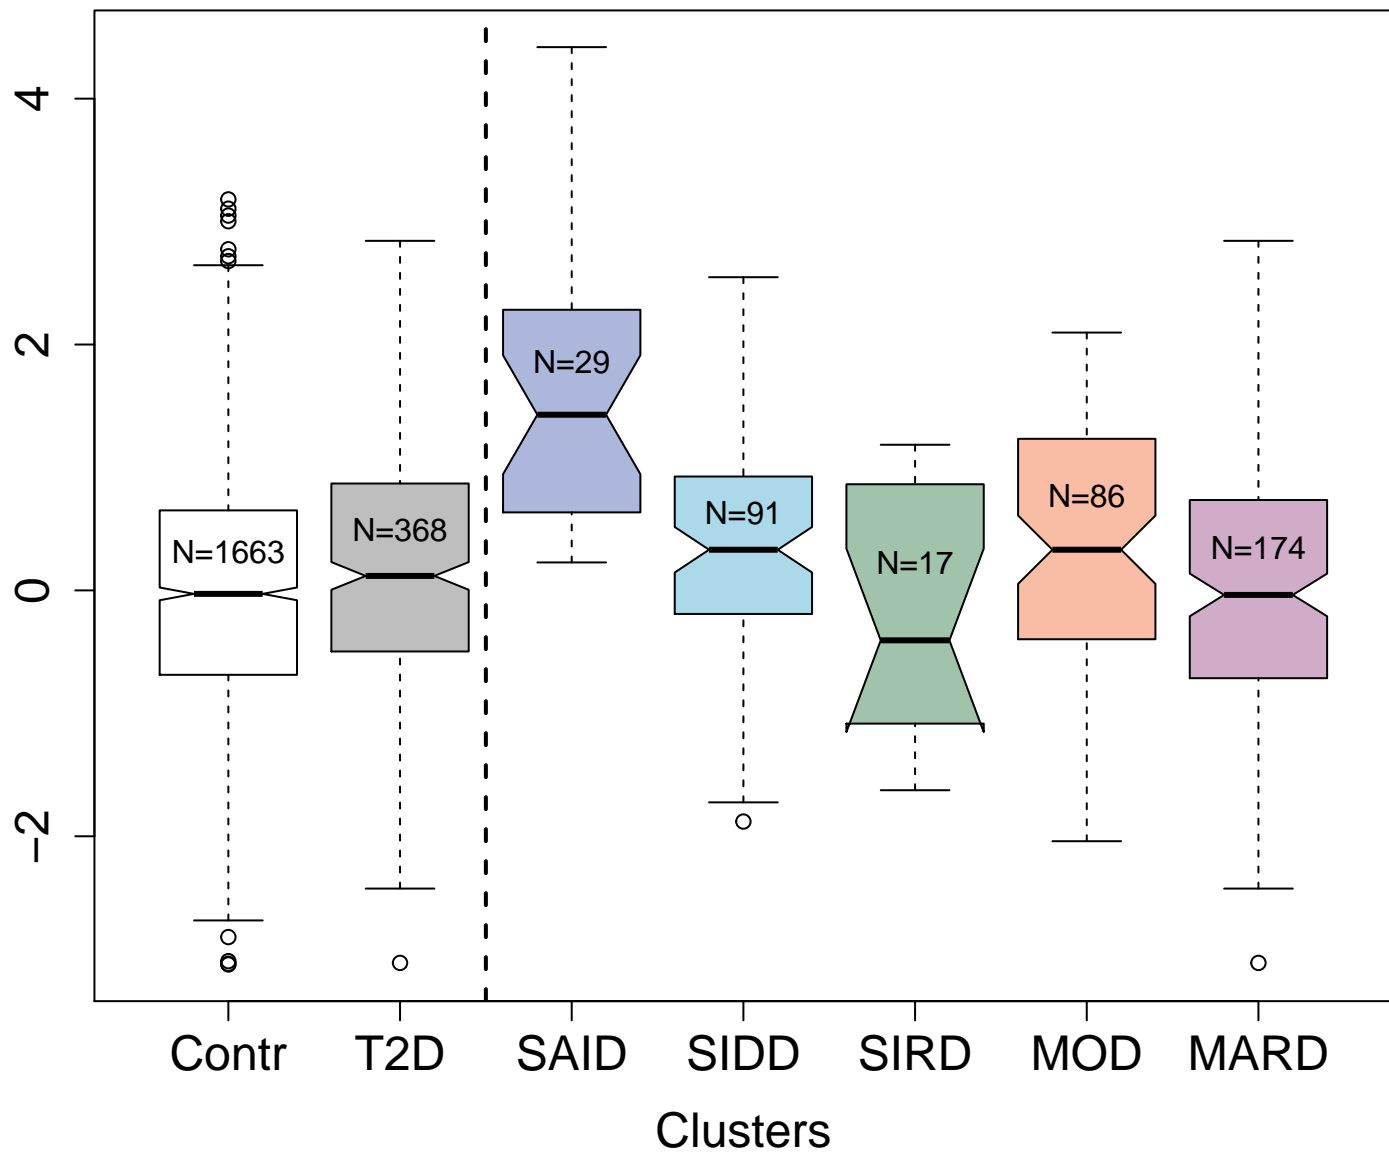

M48762 : 1,2,3-benzenetriol sulfate (2)

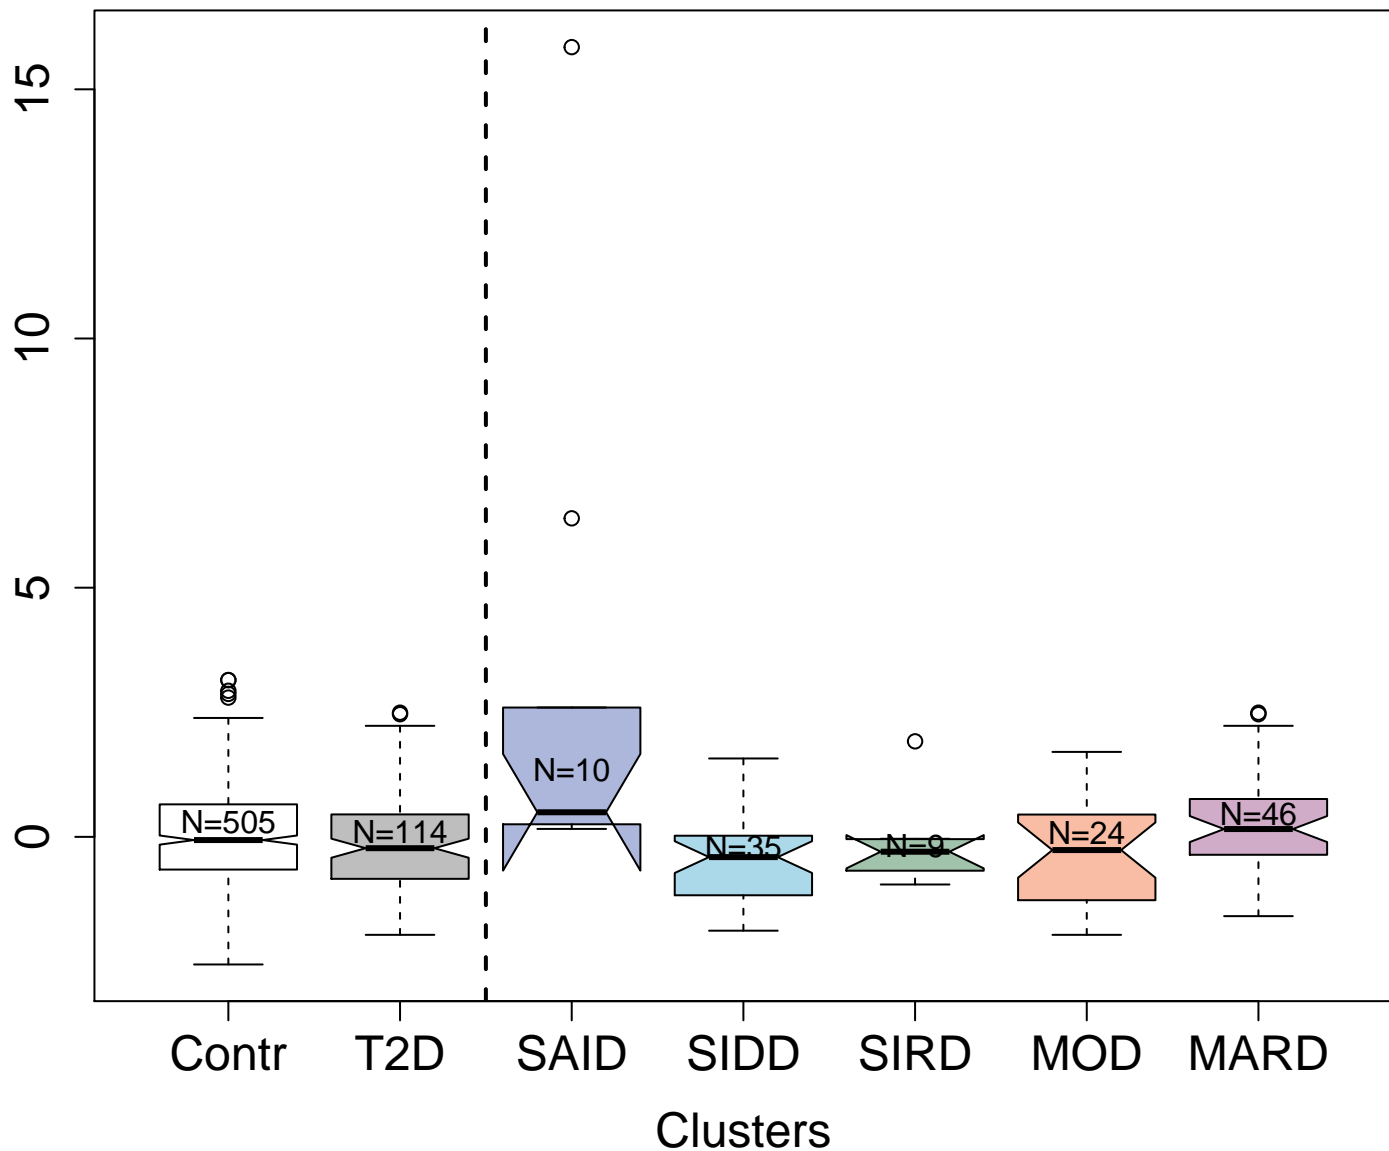

M36099 : 4-ethylphenylsulfate

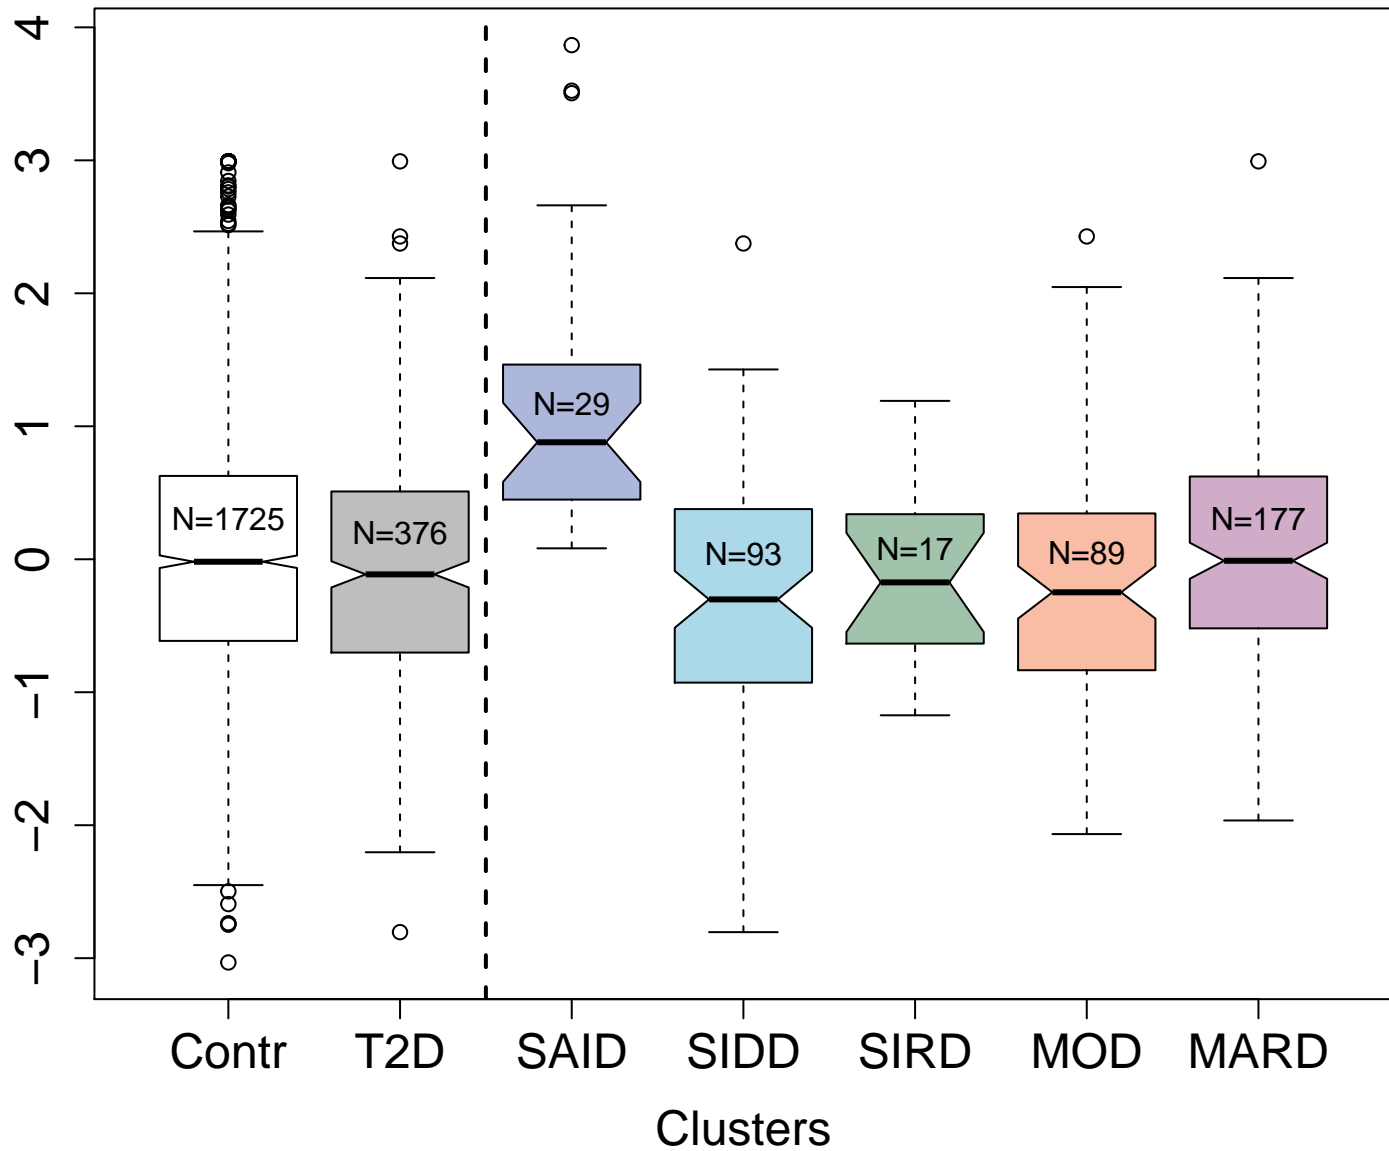

M62959 : hydroxy-N6,N6,N6-trimethyllysine\*

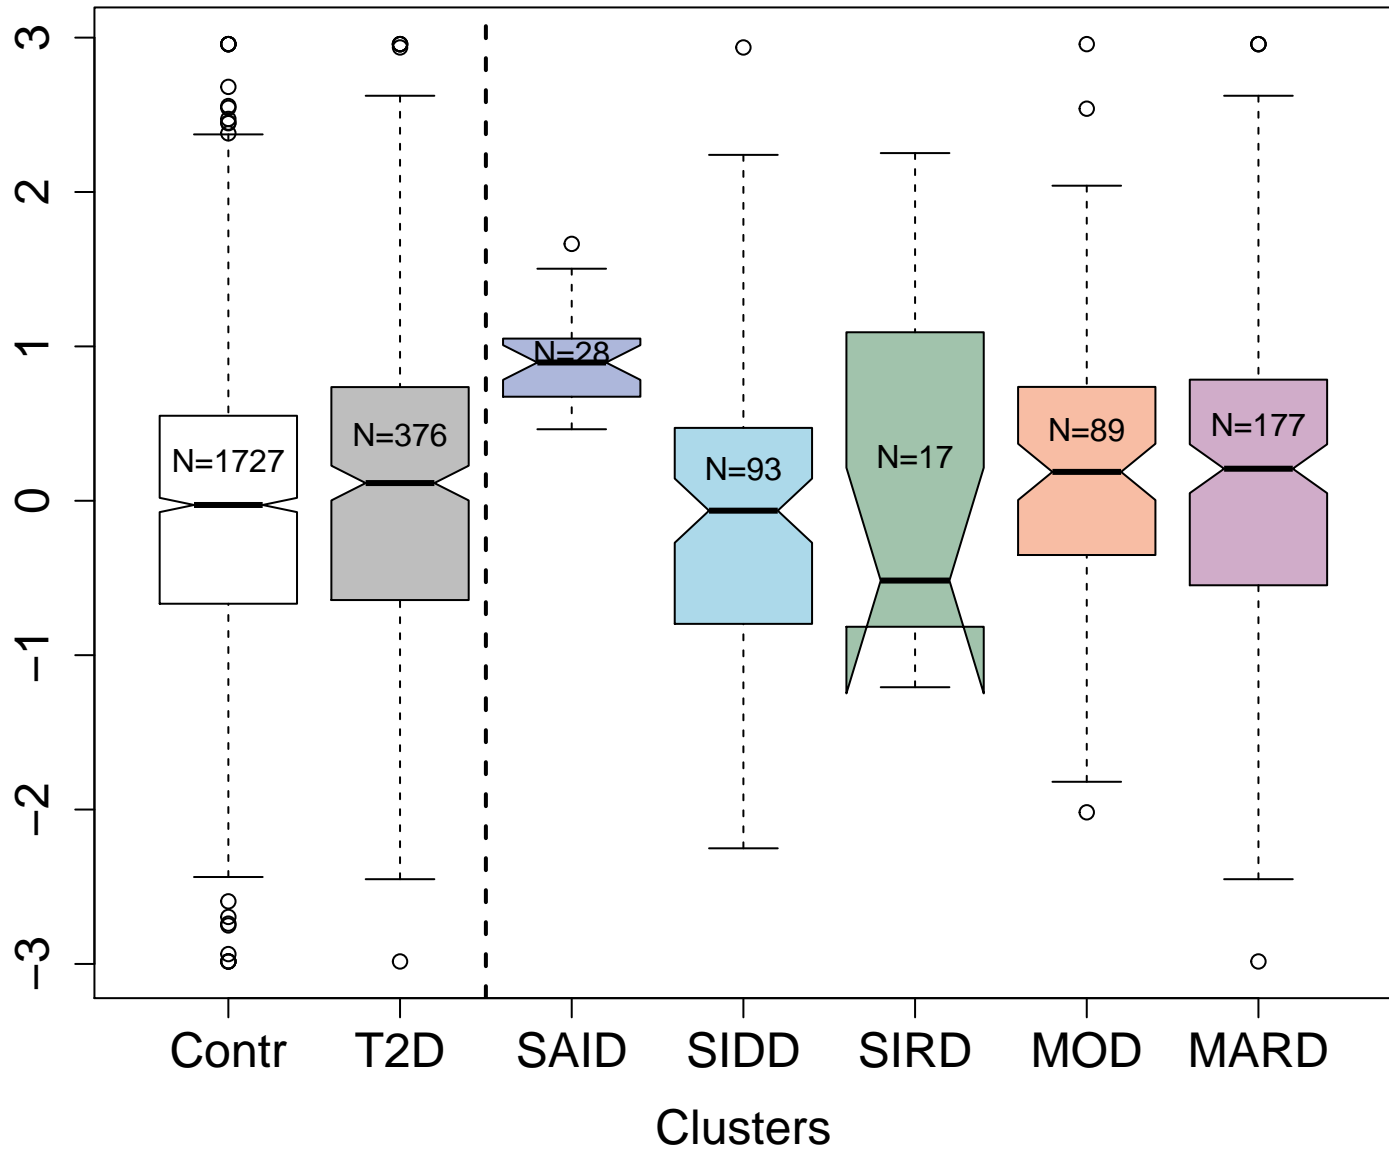



M36746 : 2-hydroxy-3-methylvalerate

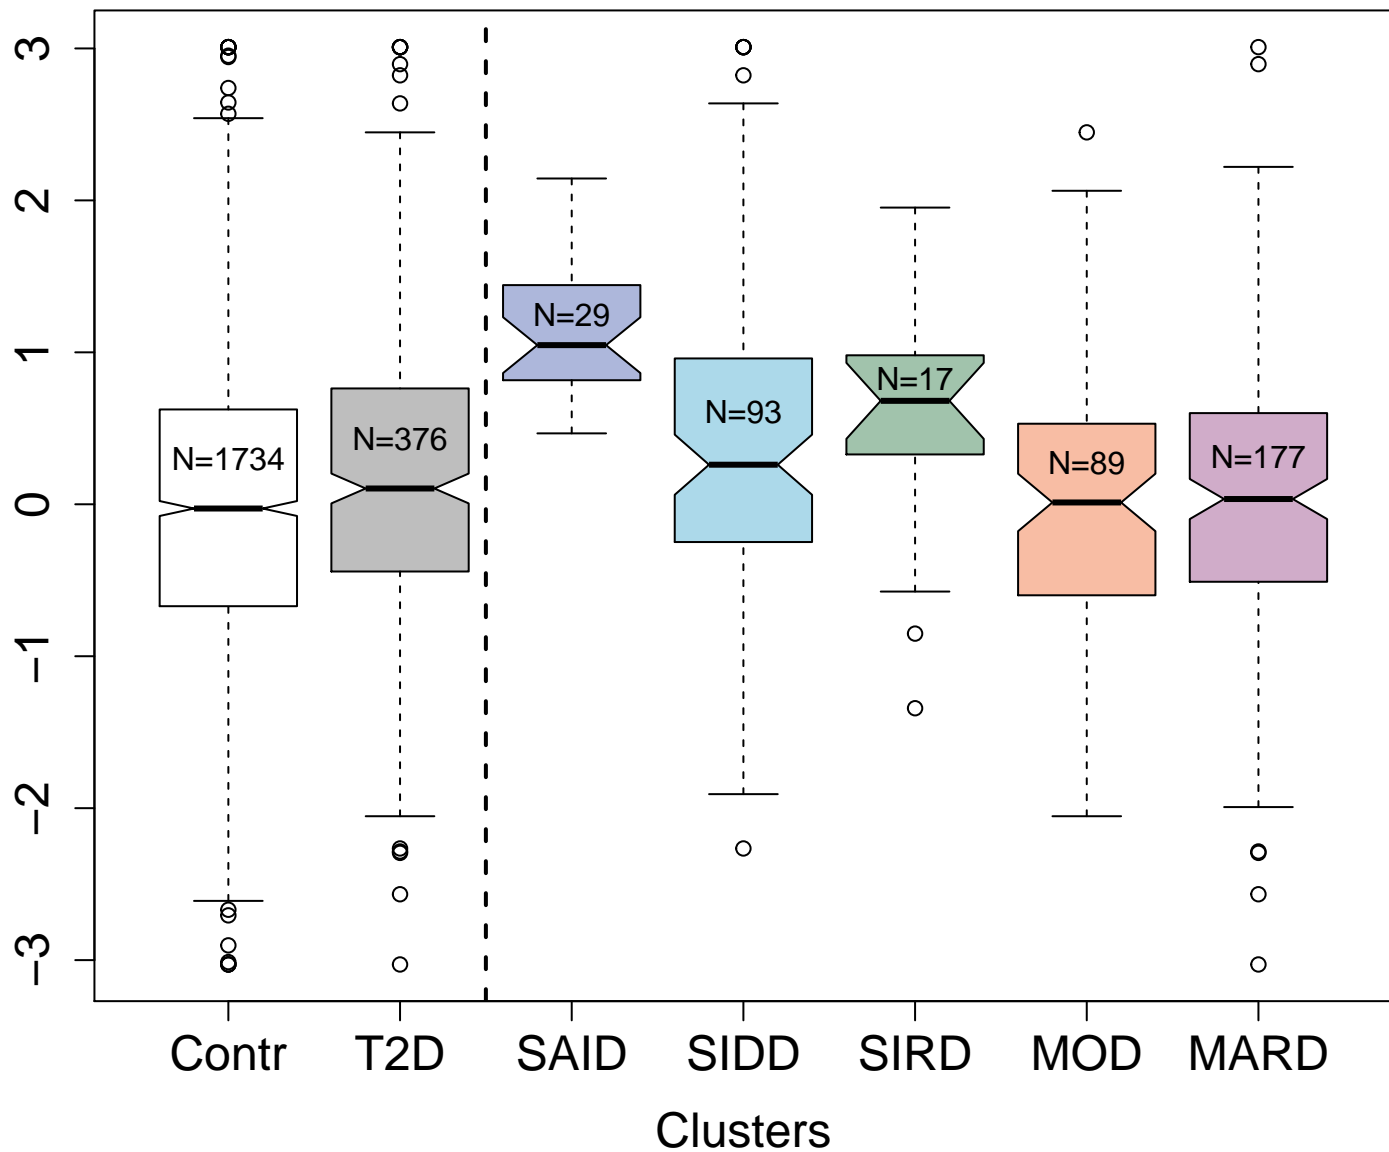

M32388 : dodecanedioate (C12-DC)

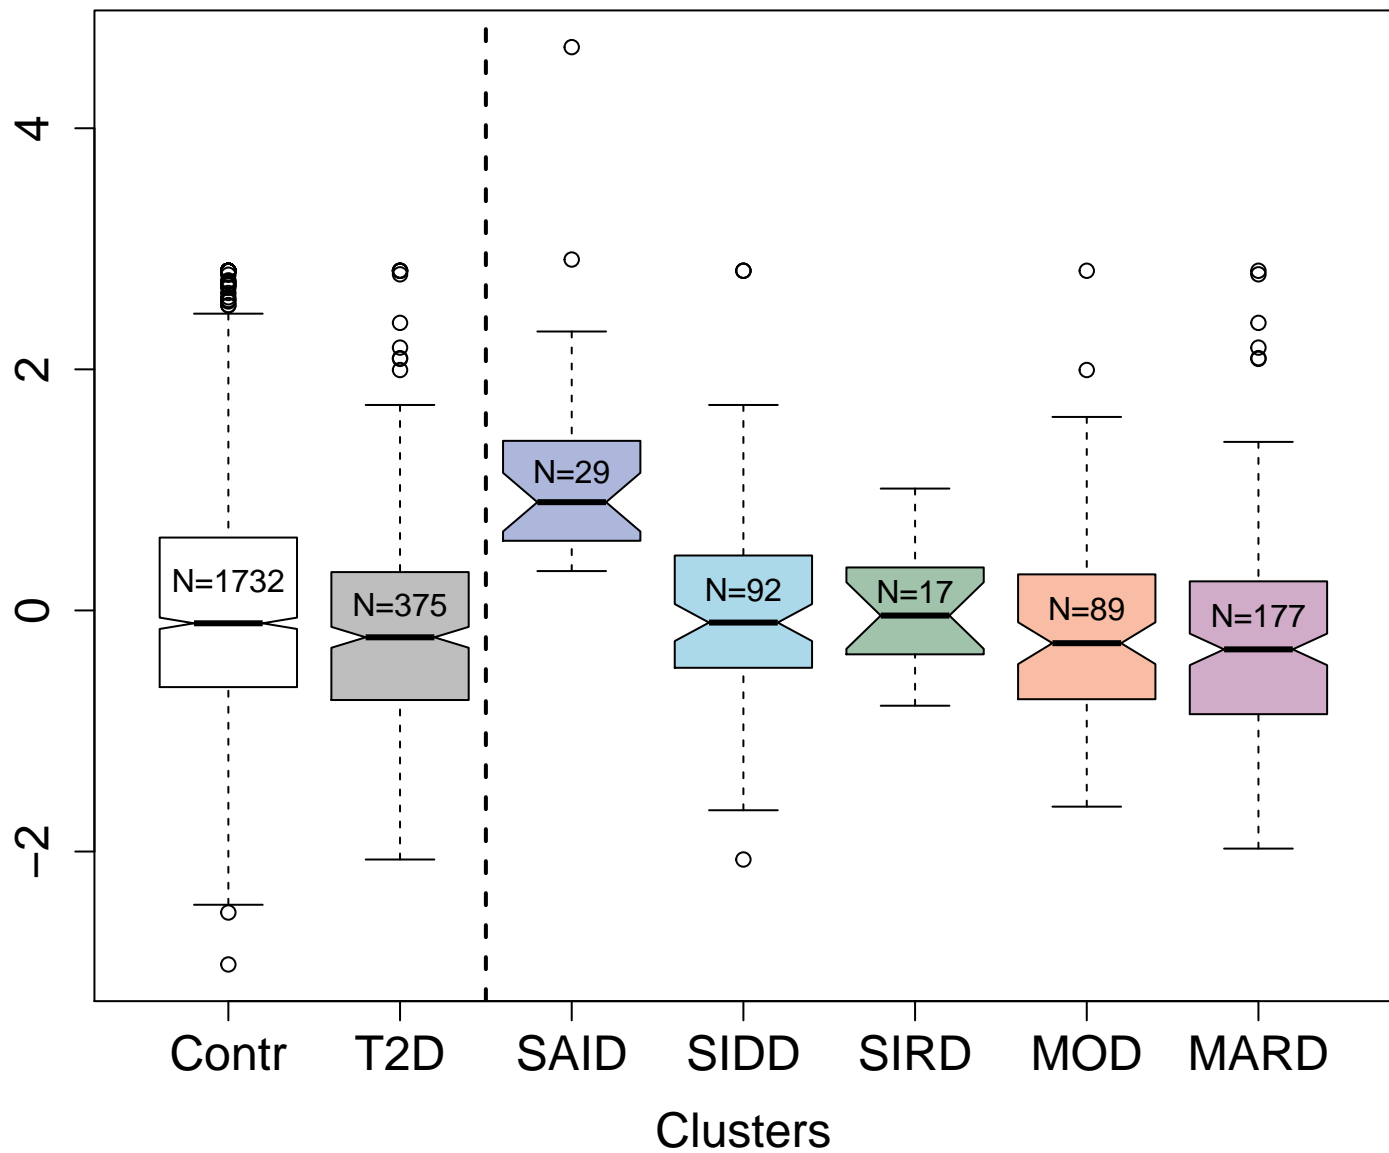

M62717 : X - 25420

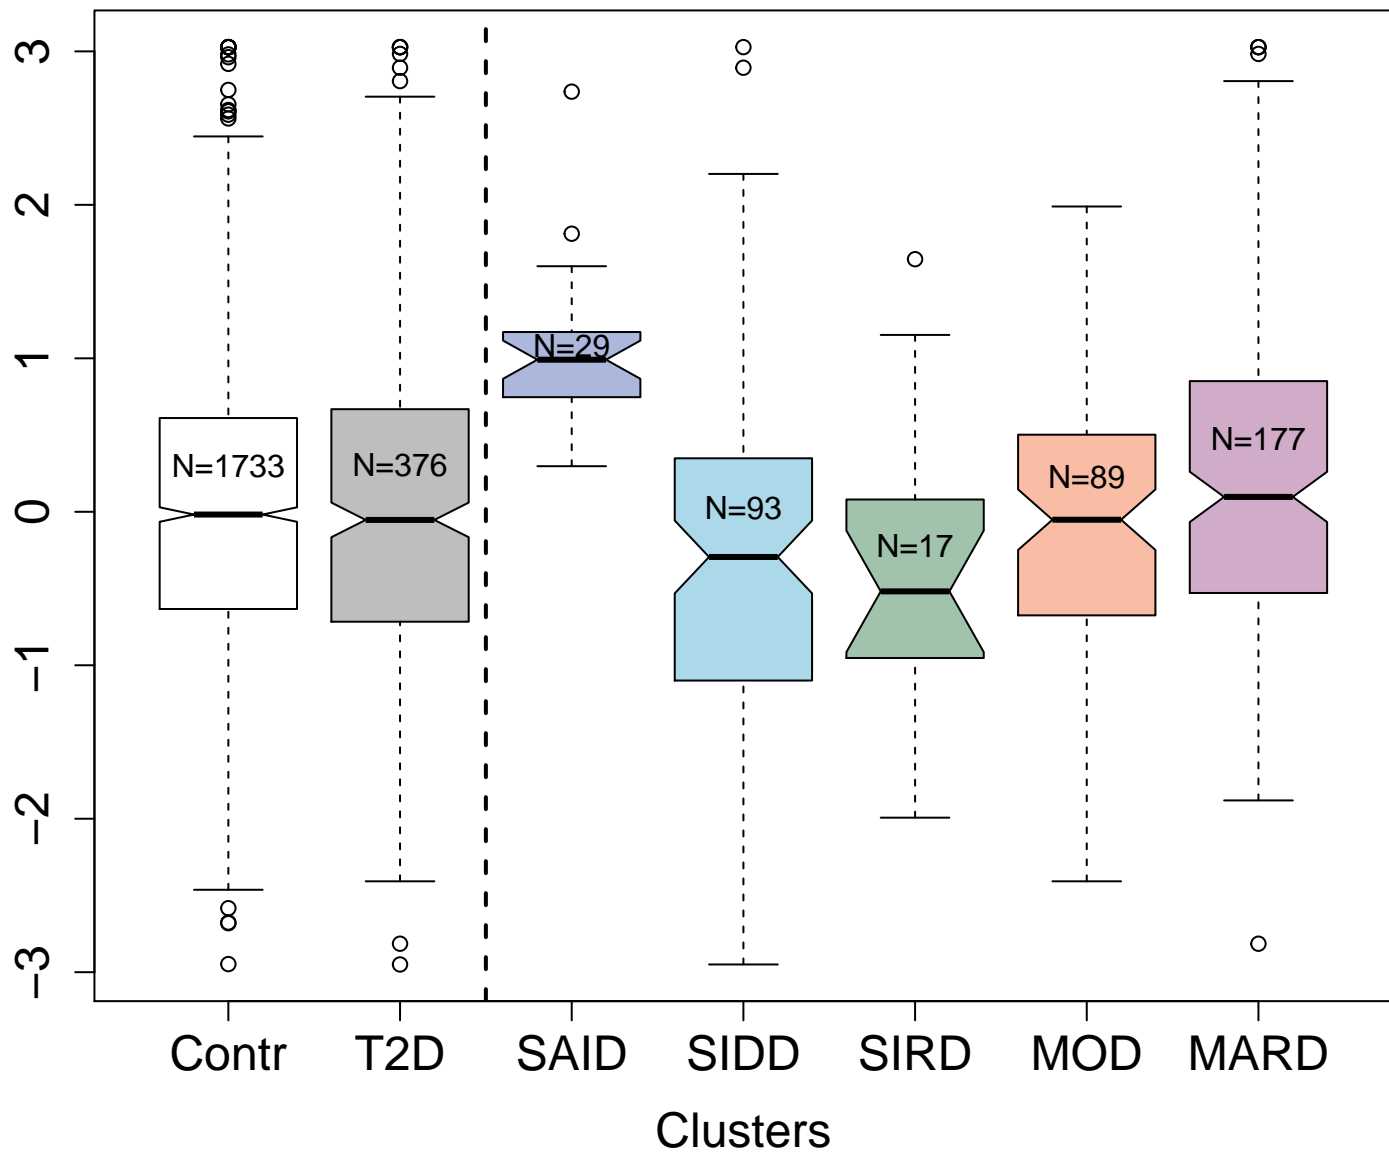

M52460 : 1-palmitoyl-2-linoleoyl-GPC (16:0/18:2)

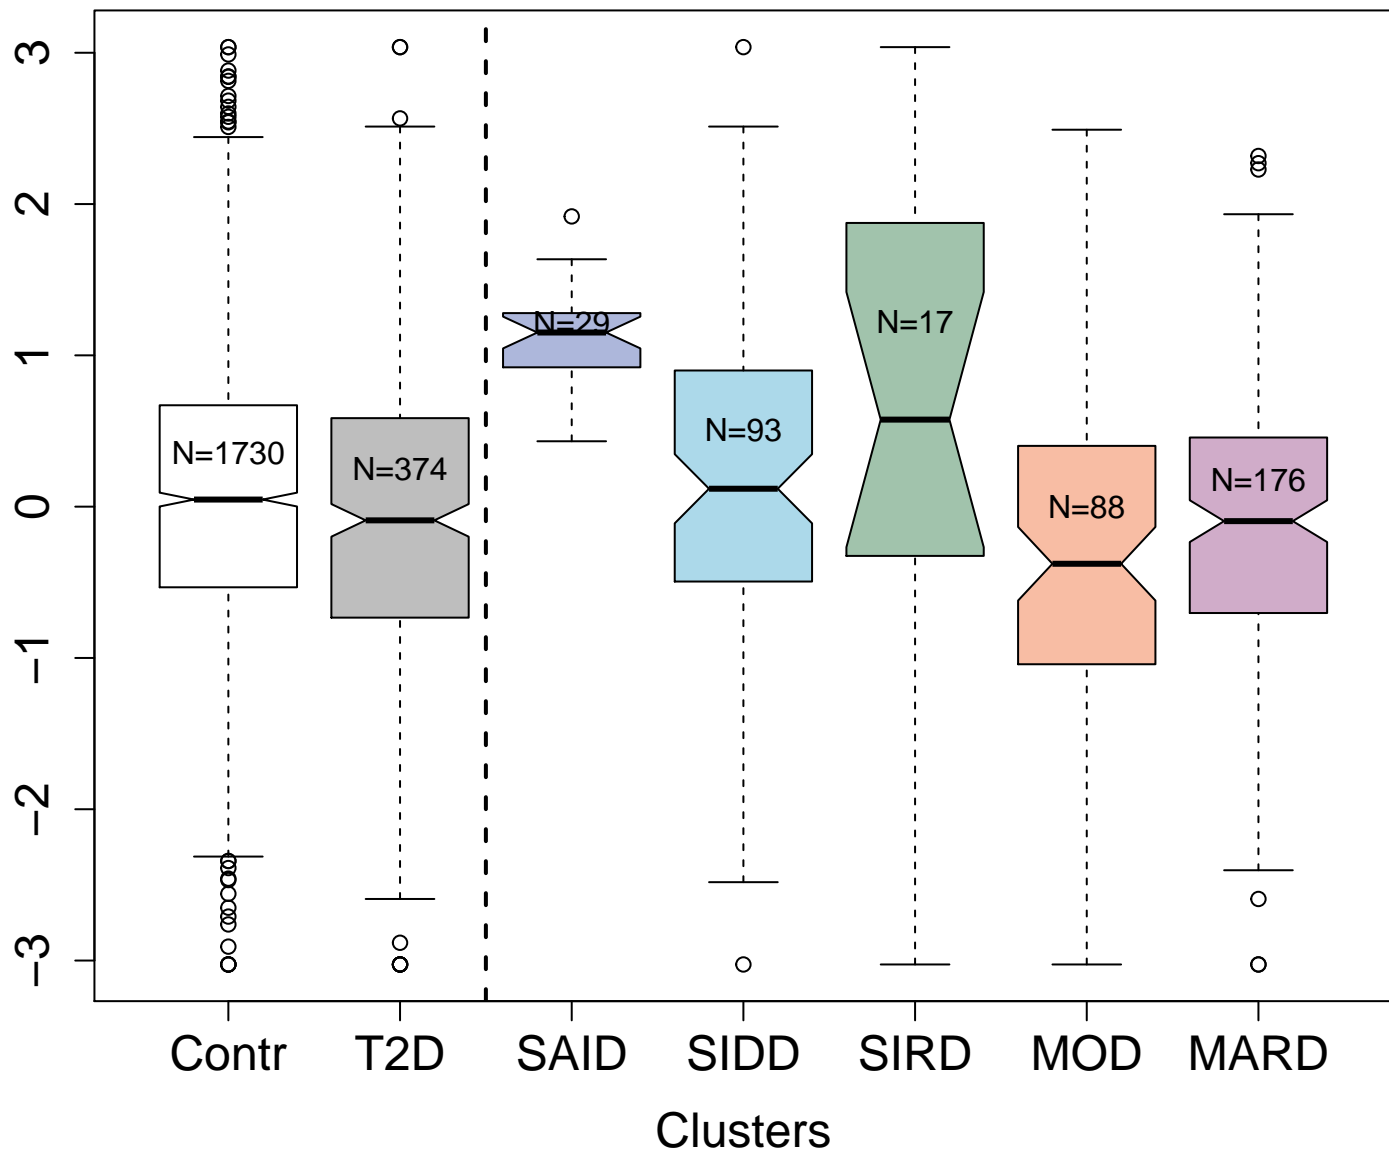

M48351 : N1-methylinosine

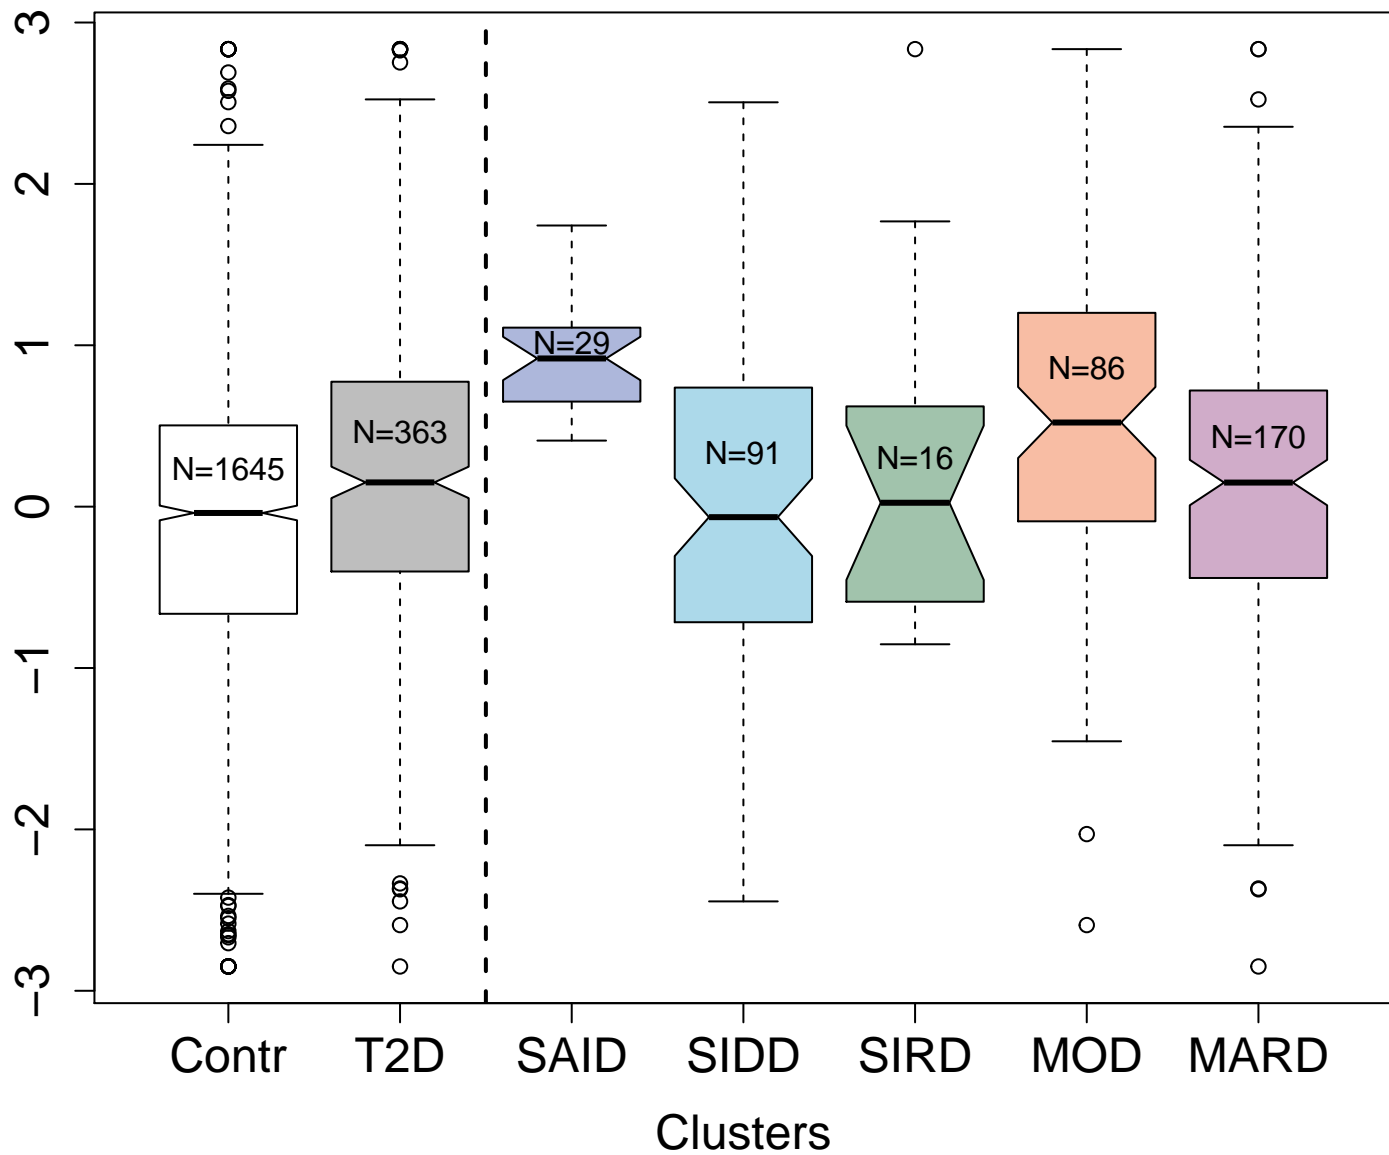

M48434 : N-acetylcitrulline

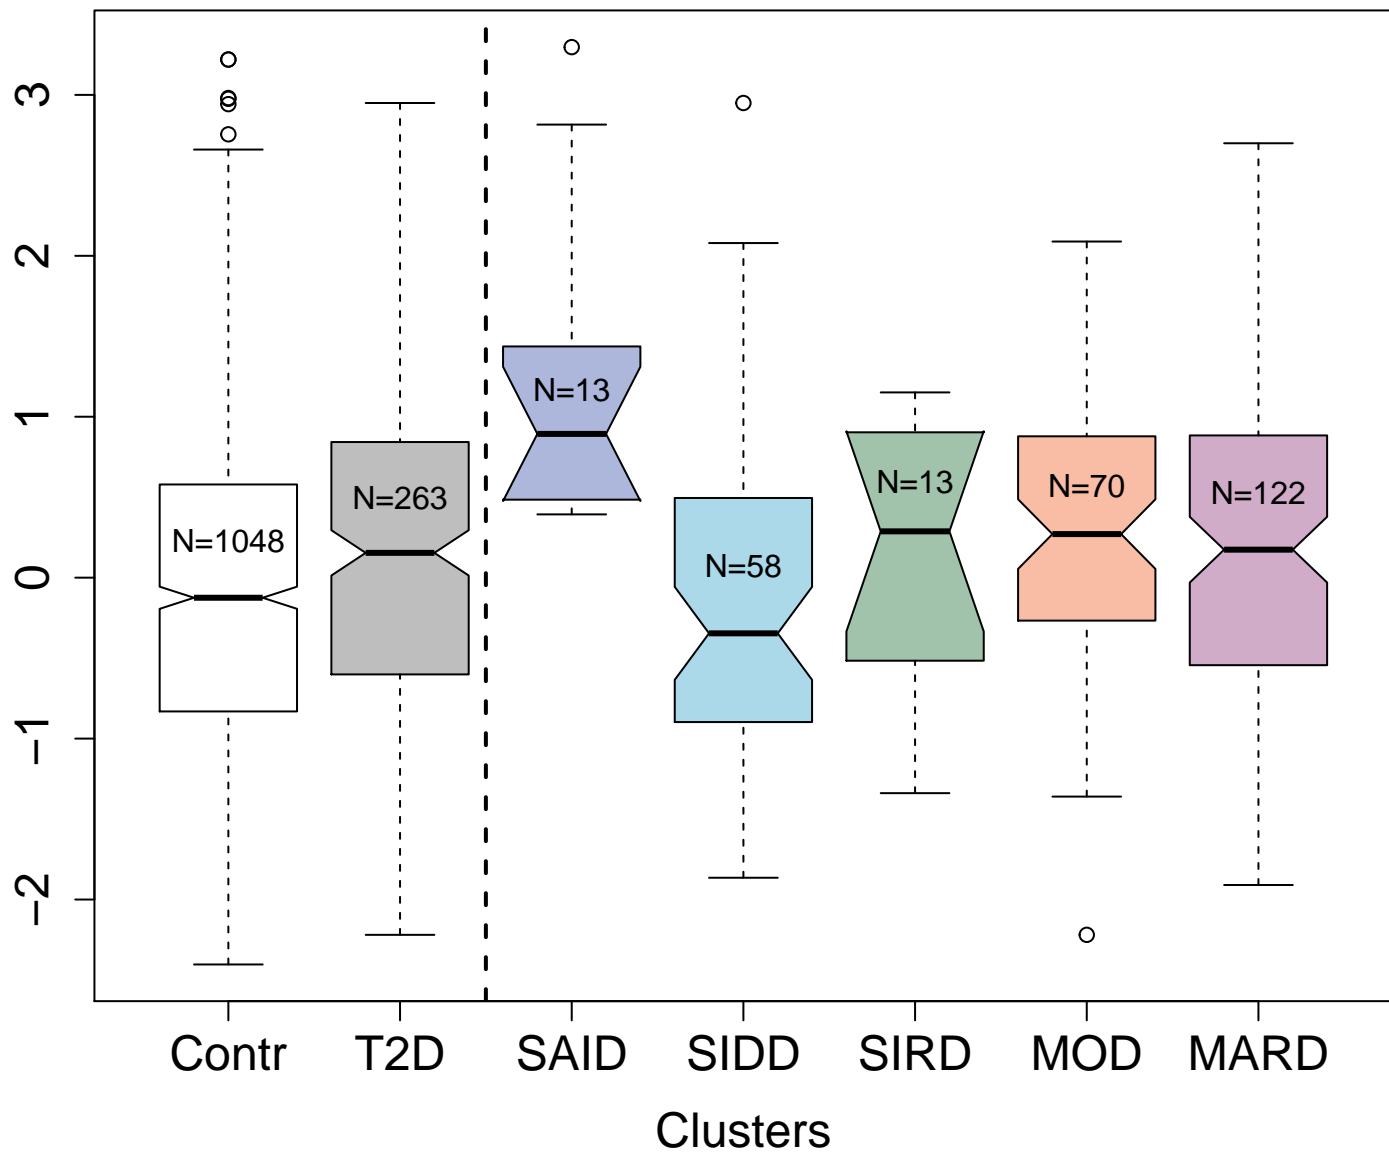

M46658 : X - 15220

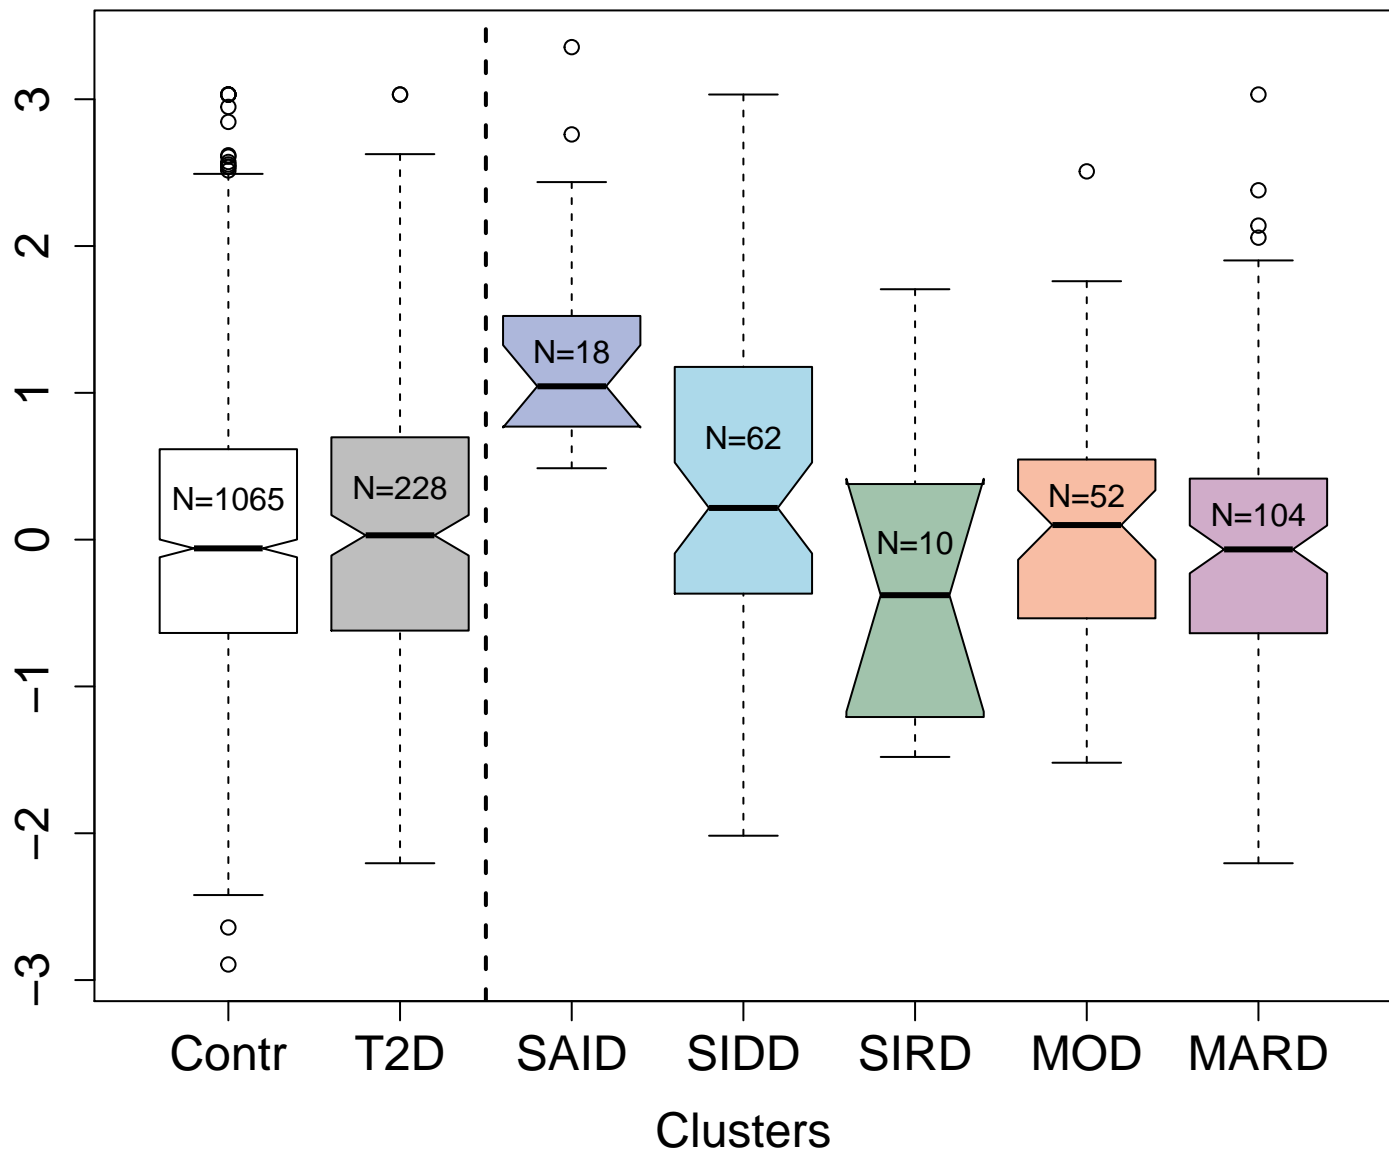

M34534 : laurylcarnitine (C12)

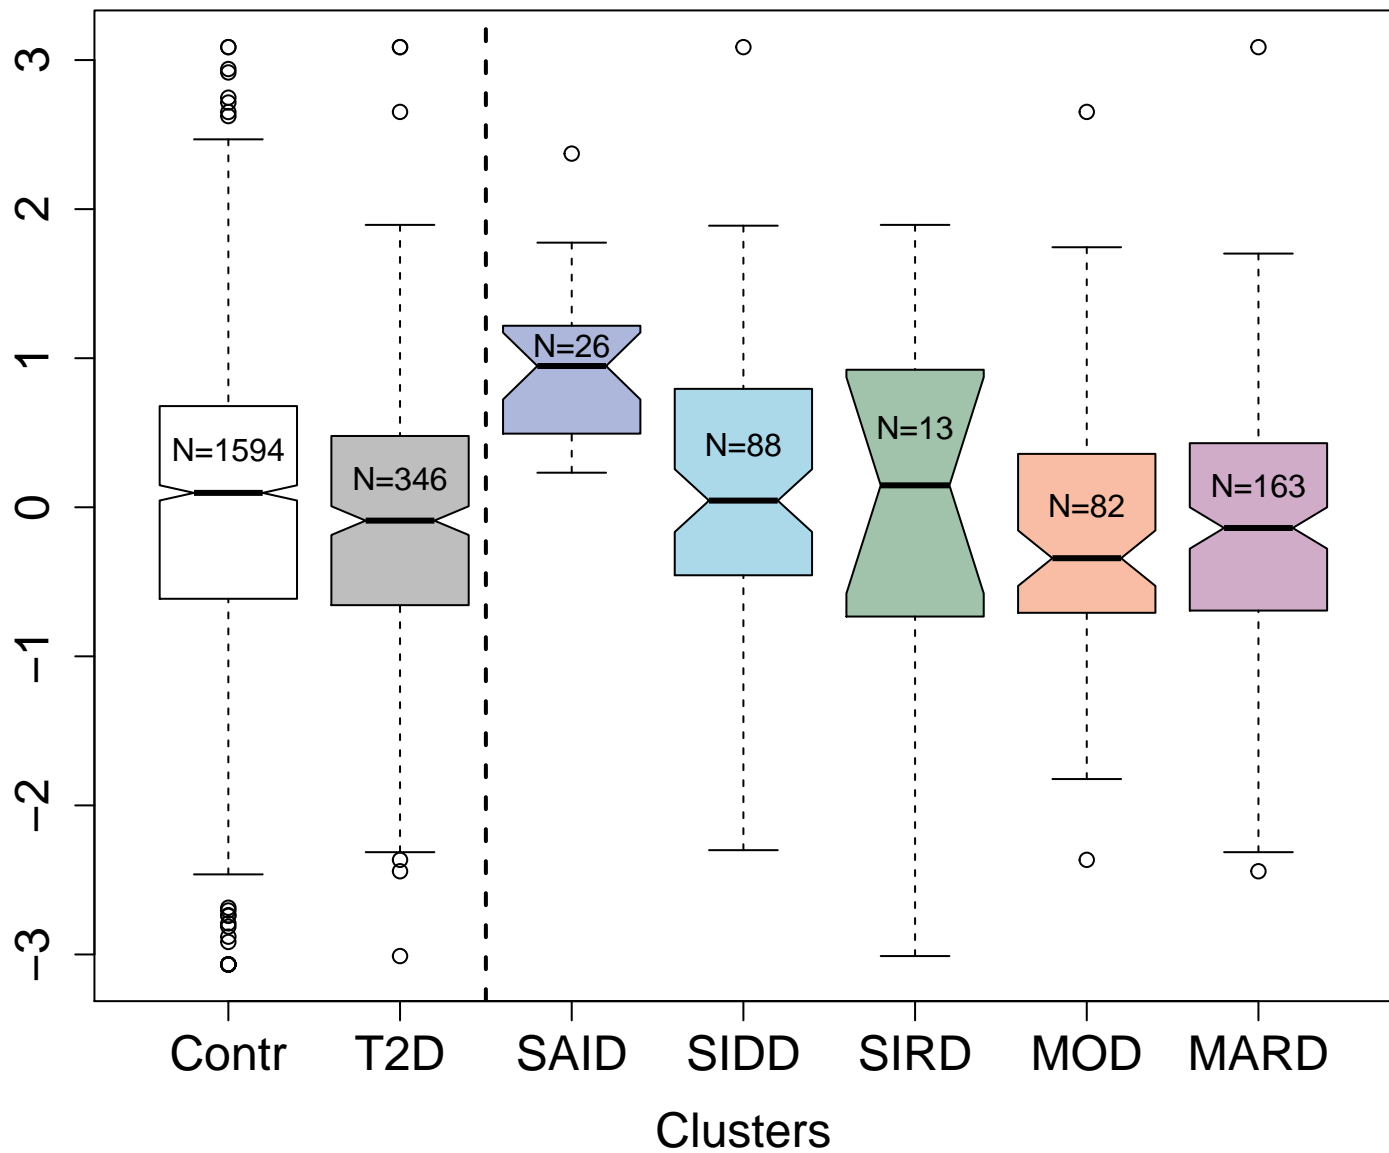



M33941 : decanoylcarnitine (C10)

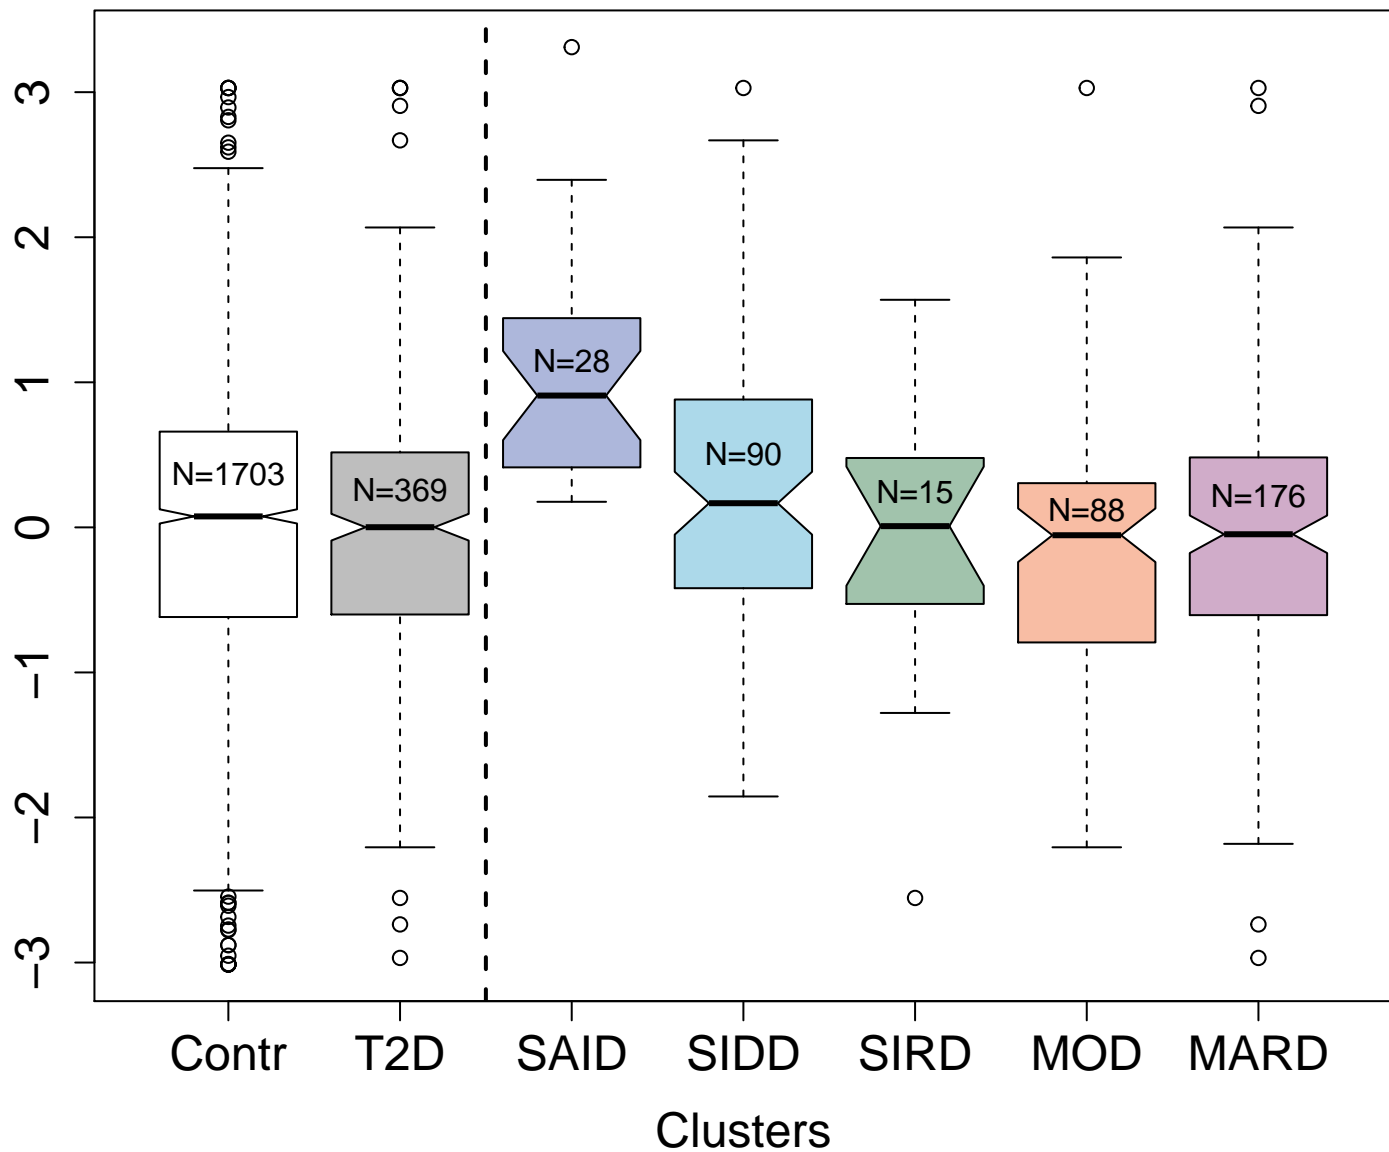

M52477 : 1-(1-enyl-palmitoyl)-2-oleoyl-GPE (P-16:0/18:1)

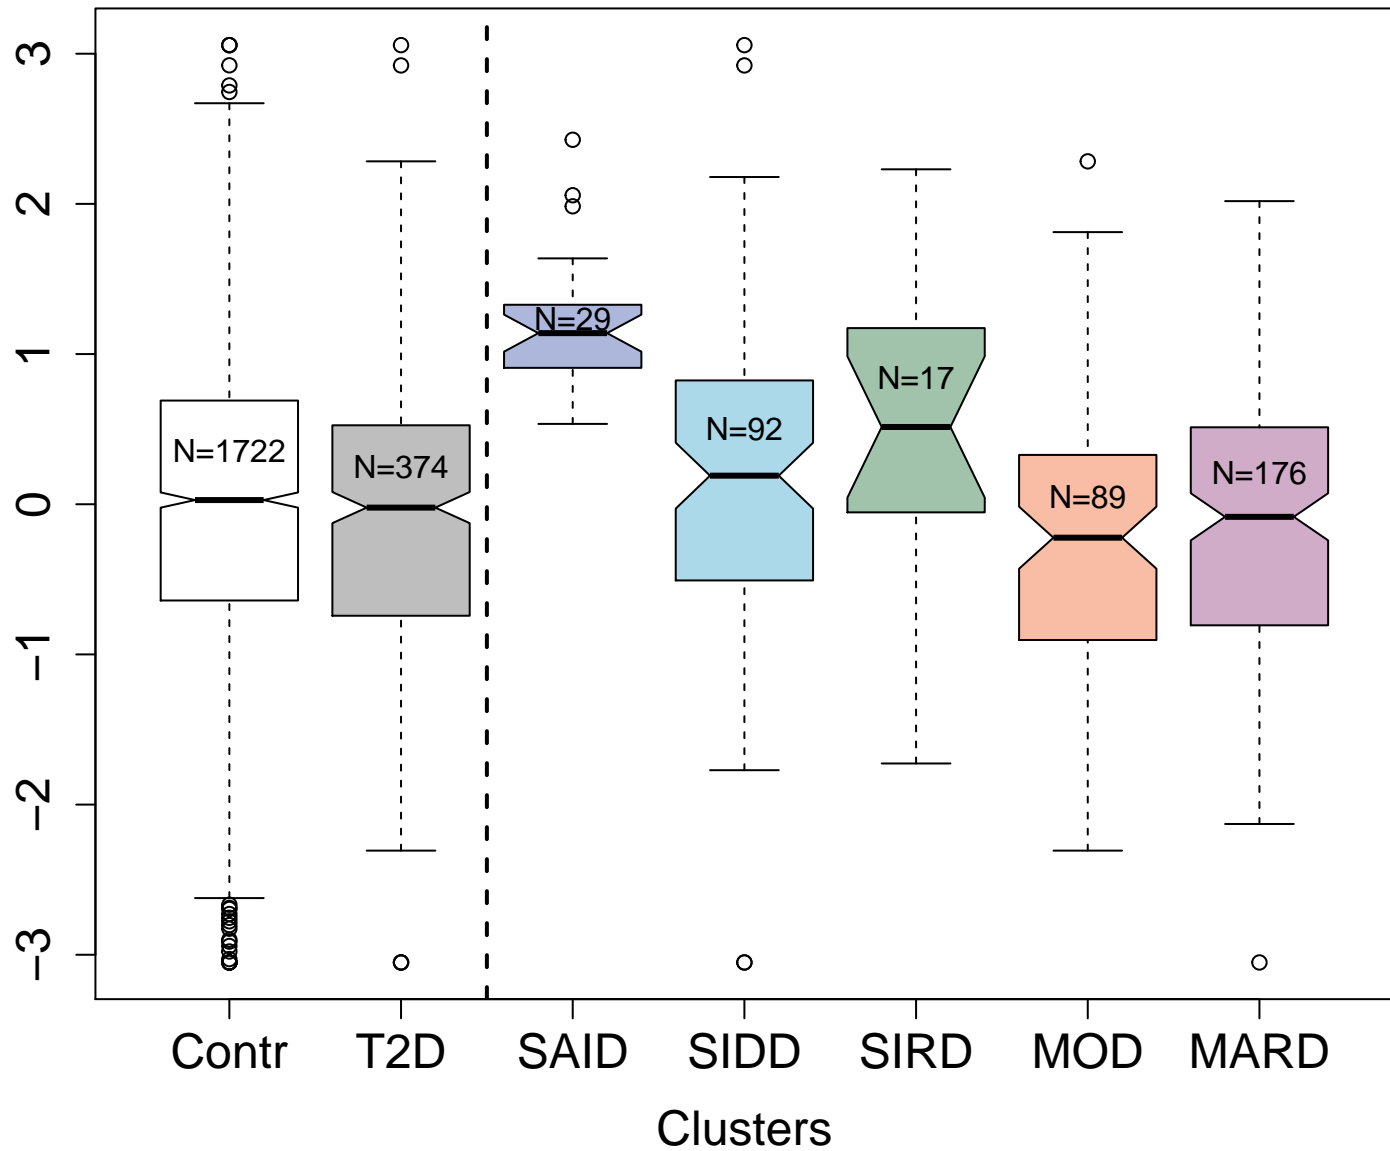

M47800 : X - 15666

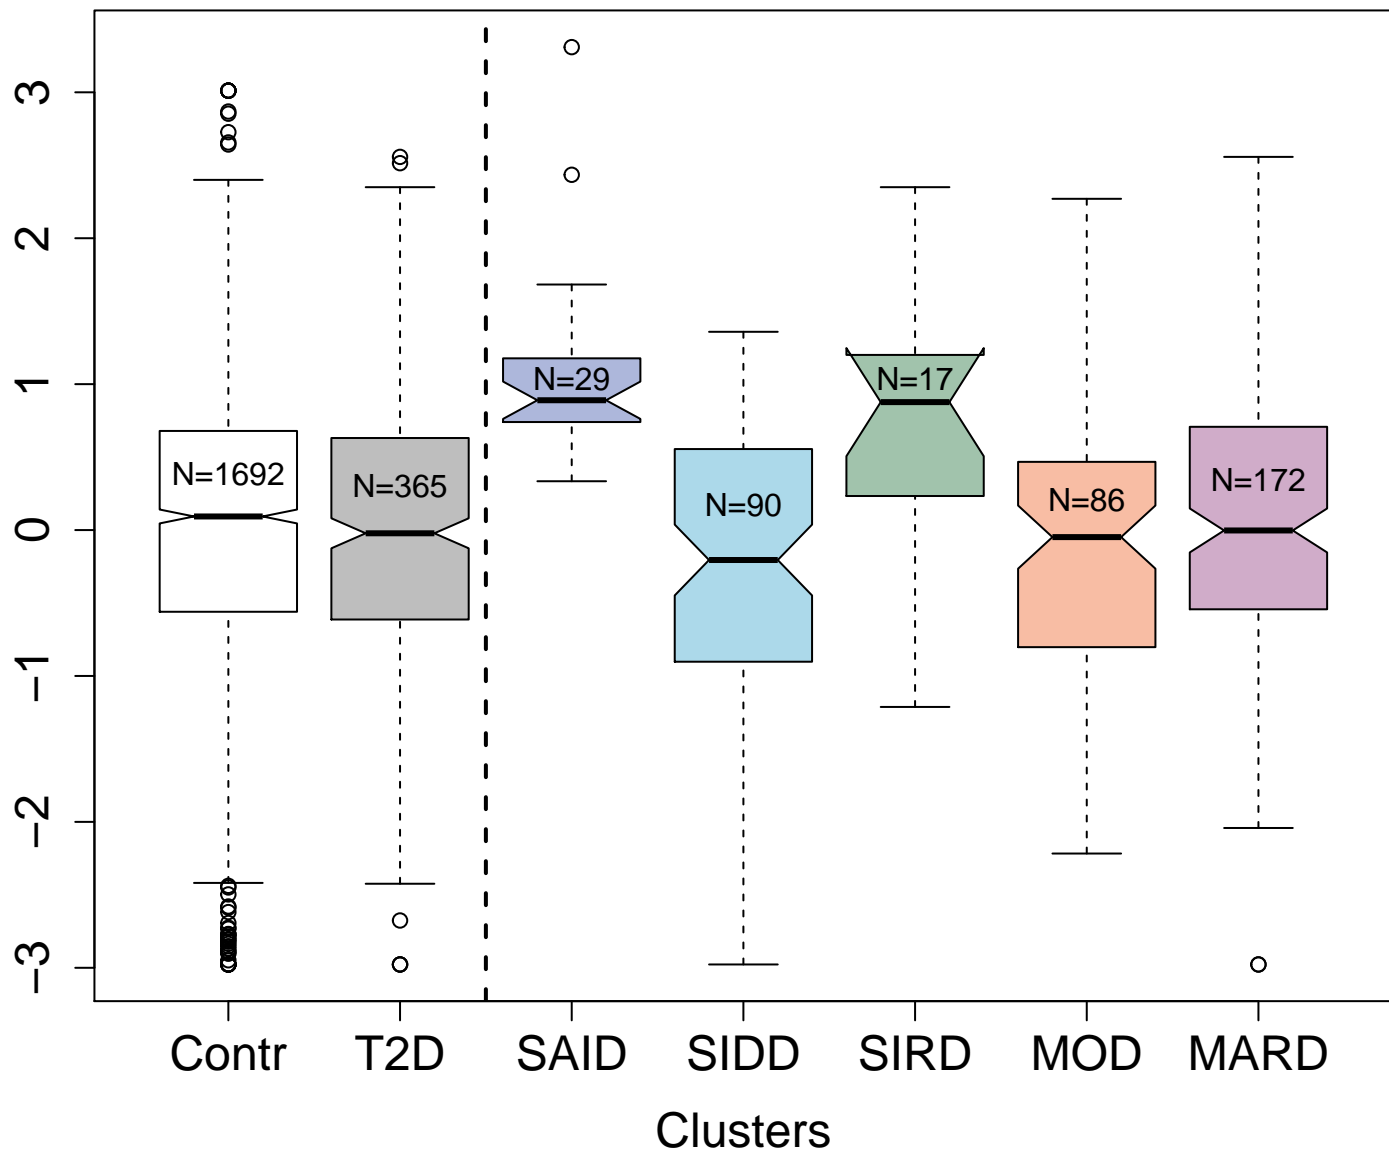

M32405 : indolepropionate

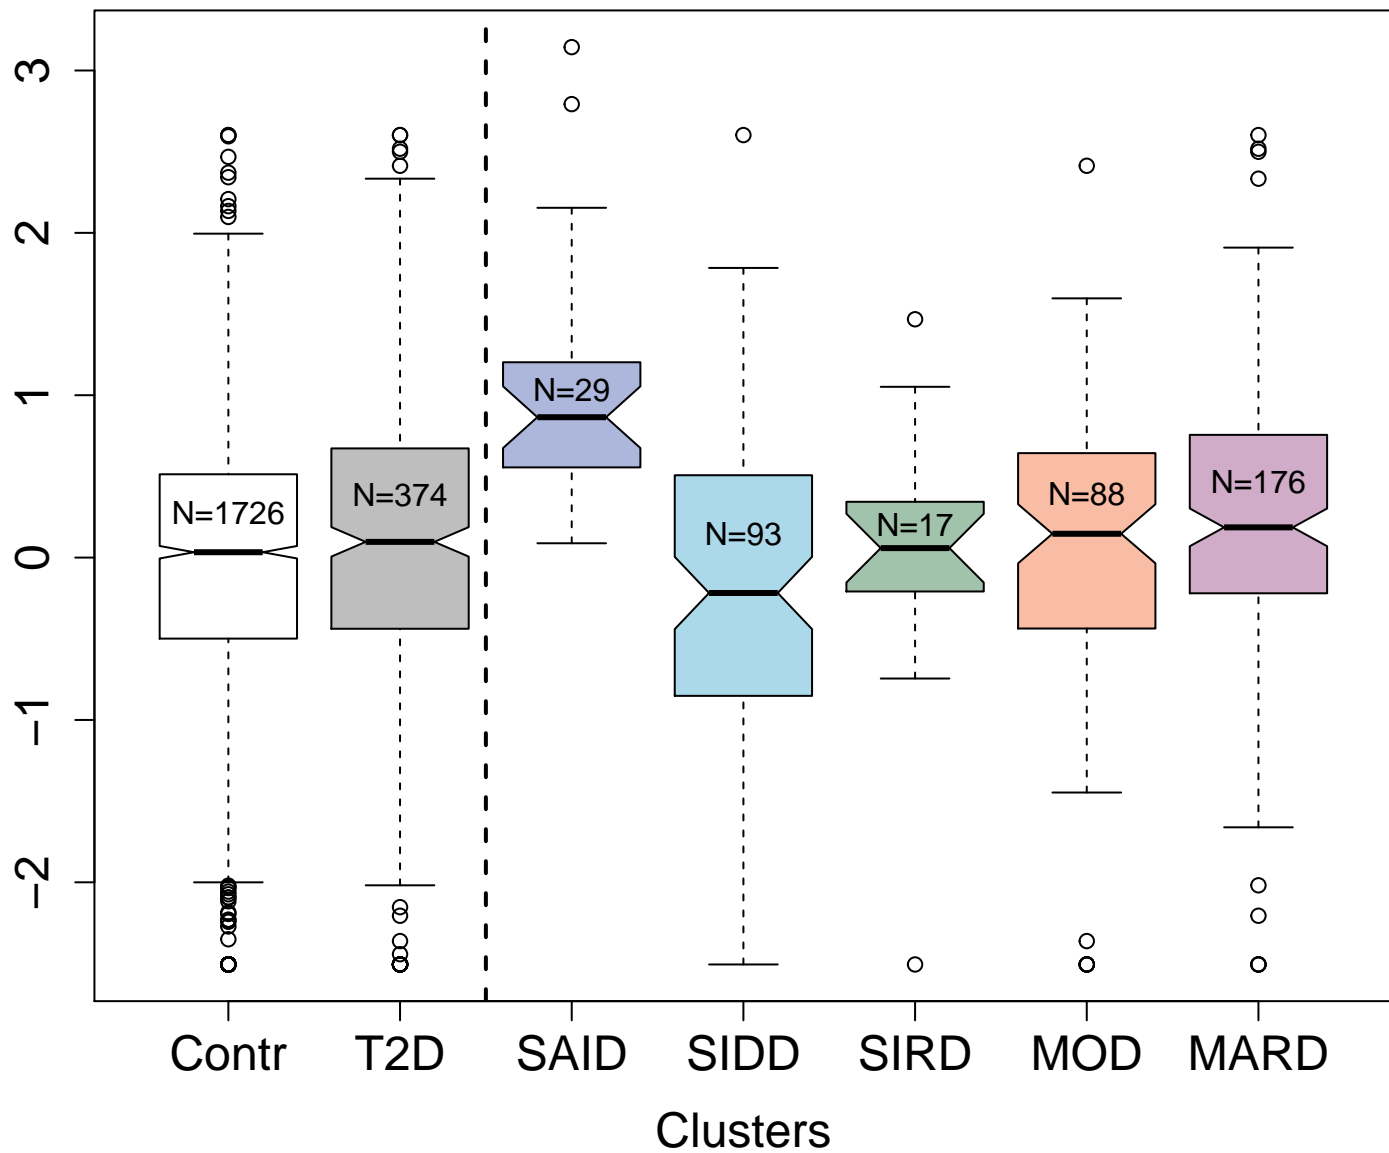

M33934 : gamma-glutamyl-epsilon-lysine

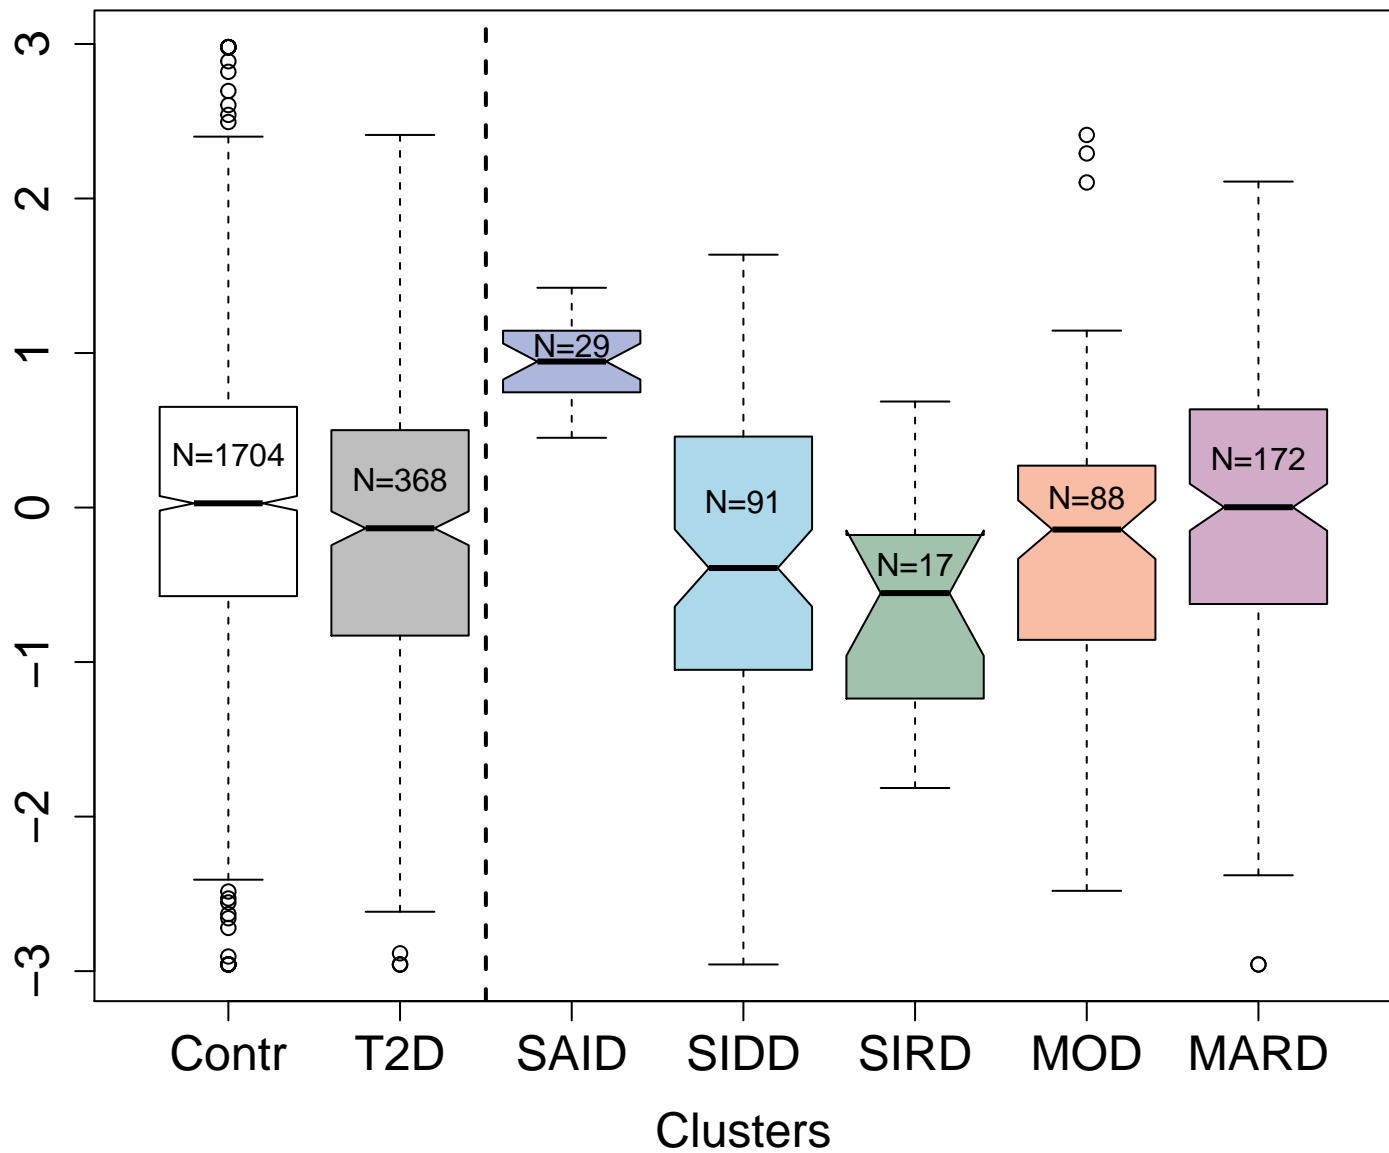

M52655 : X - 24425

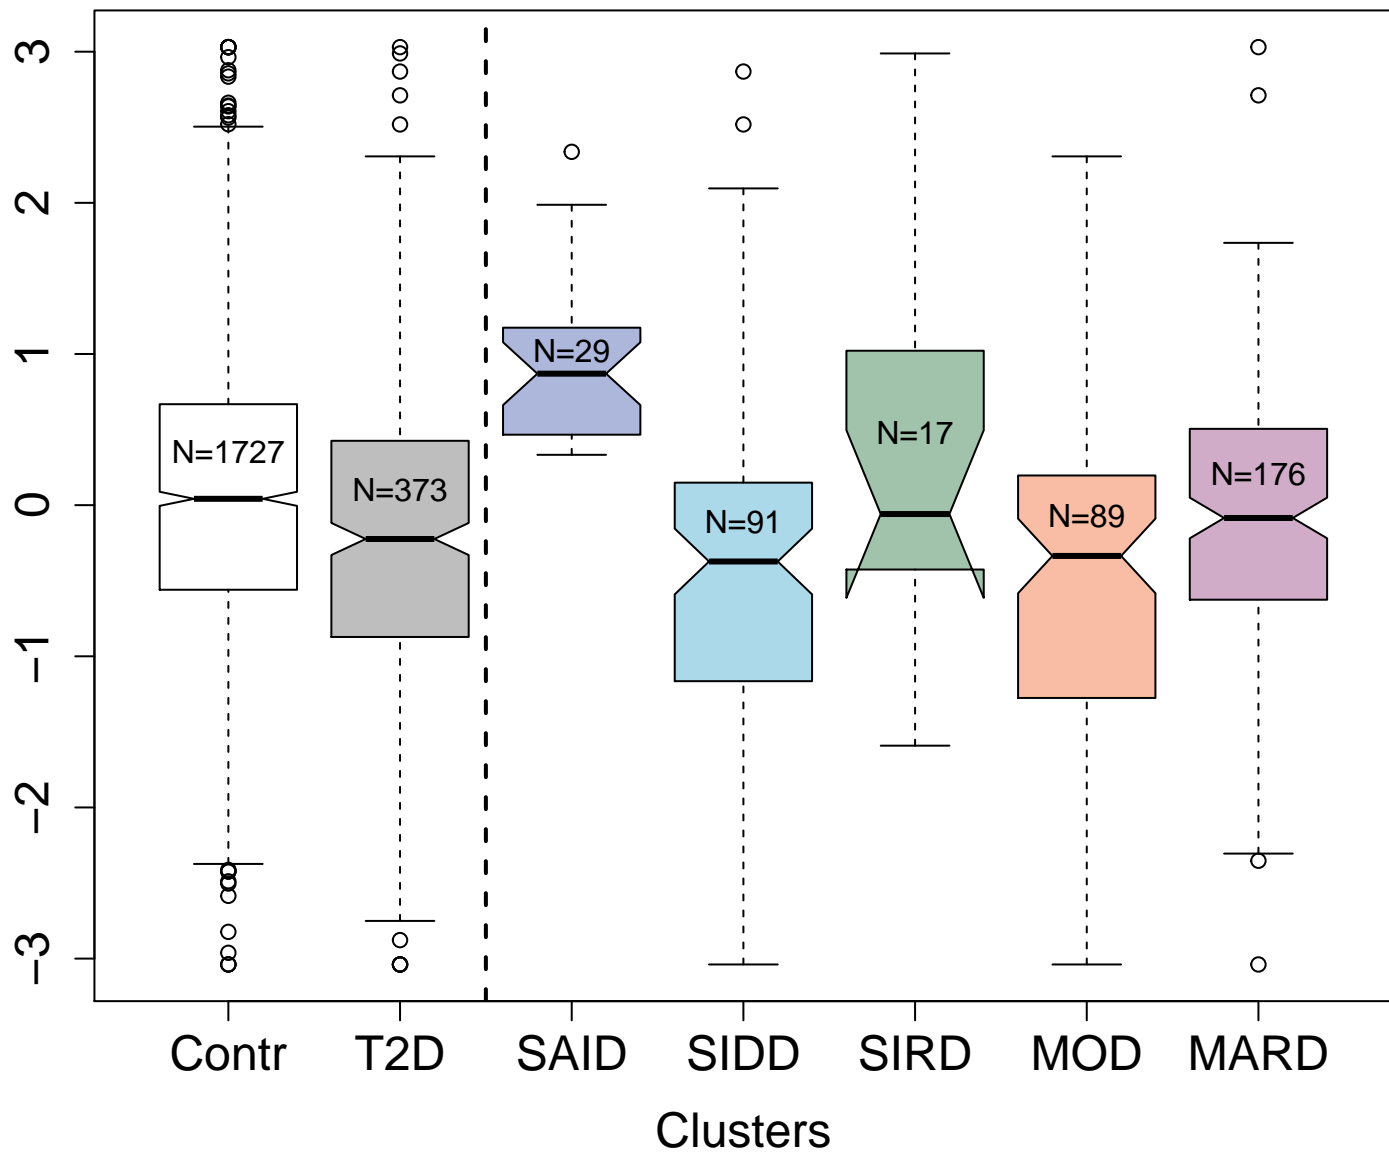

M20693 : tartronate (hydroxymalonate)

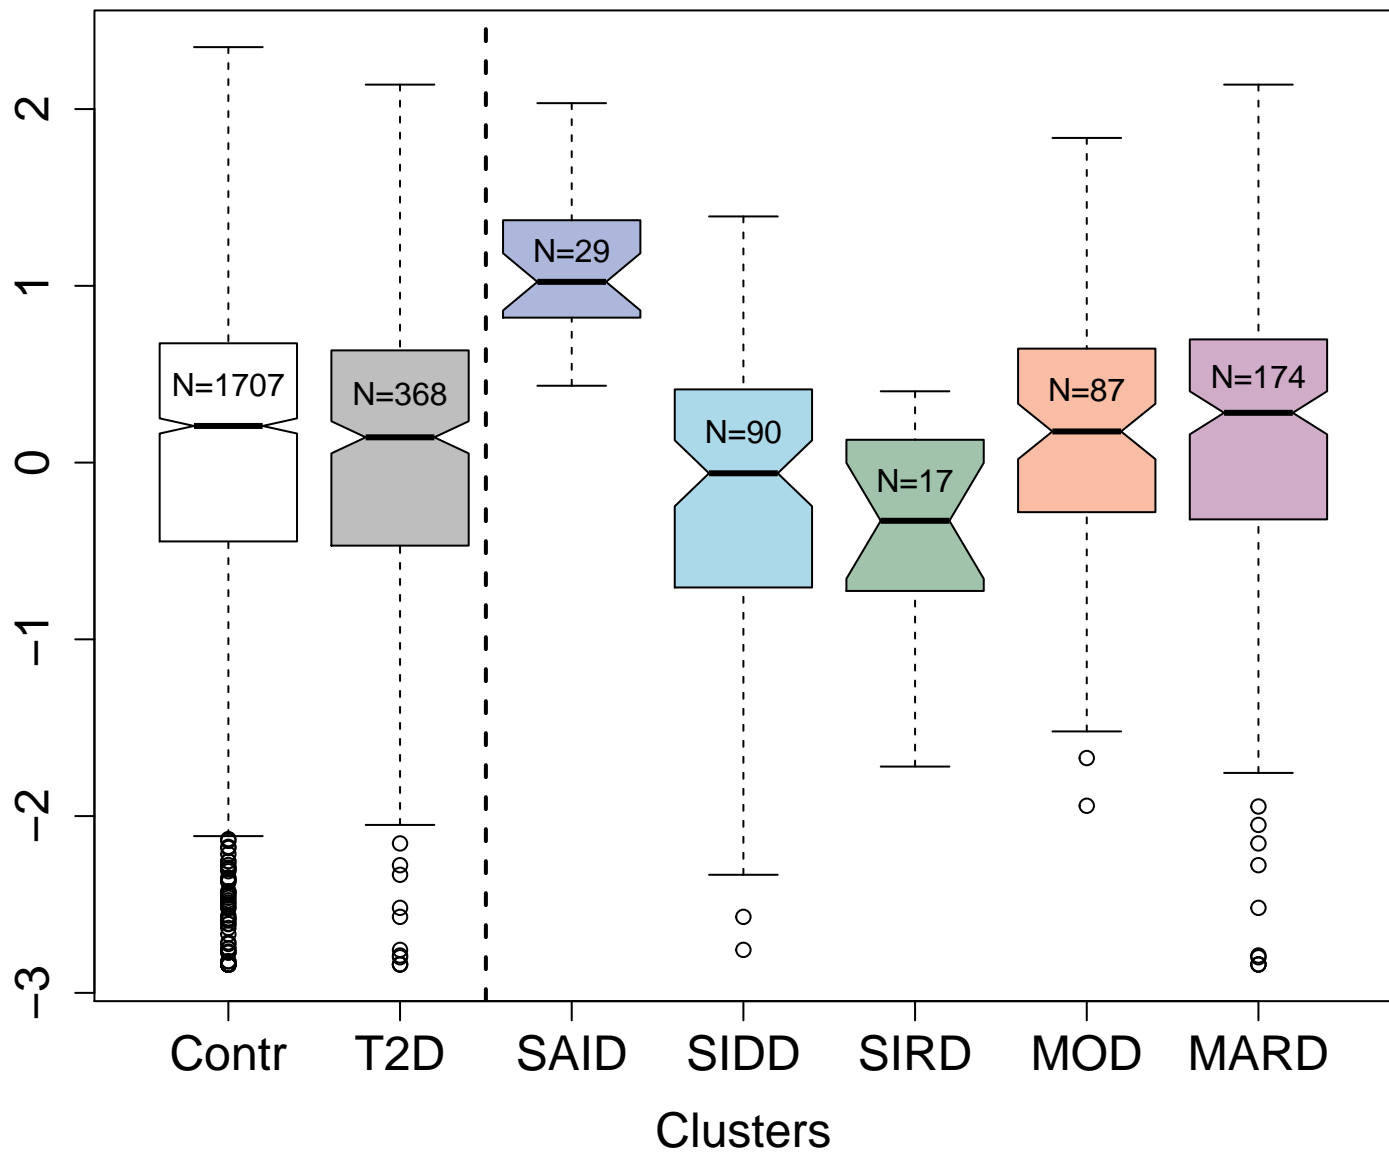

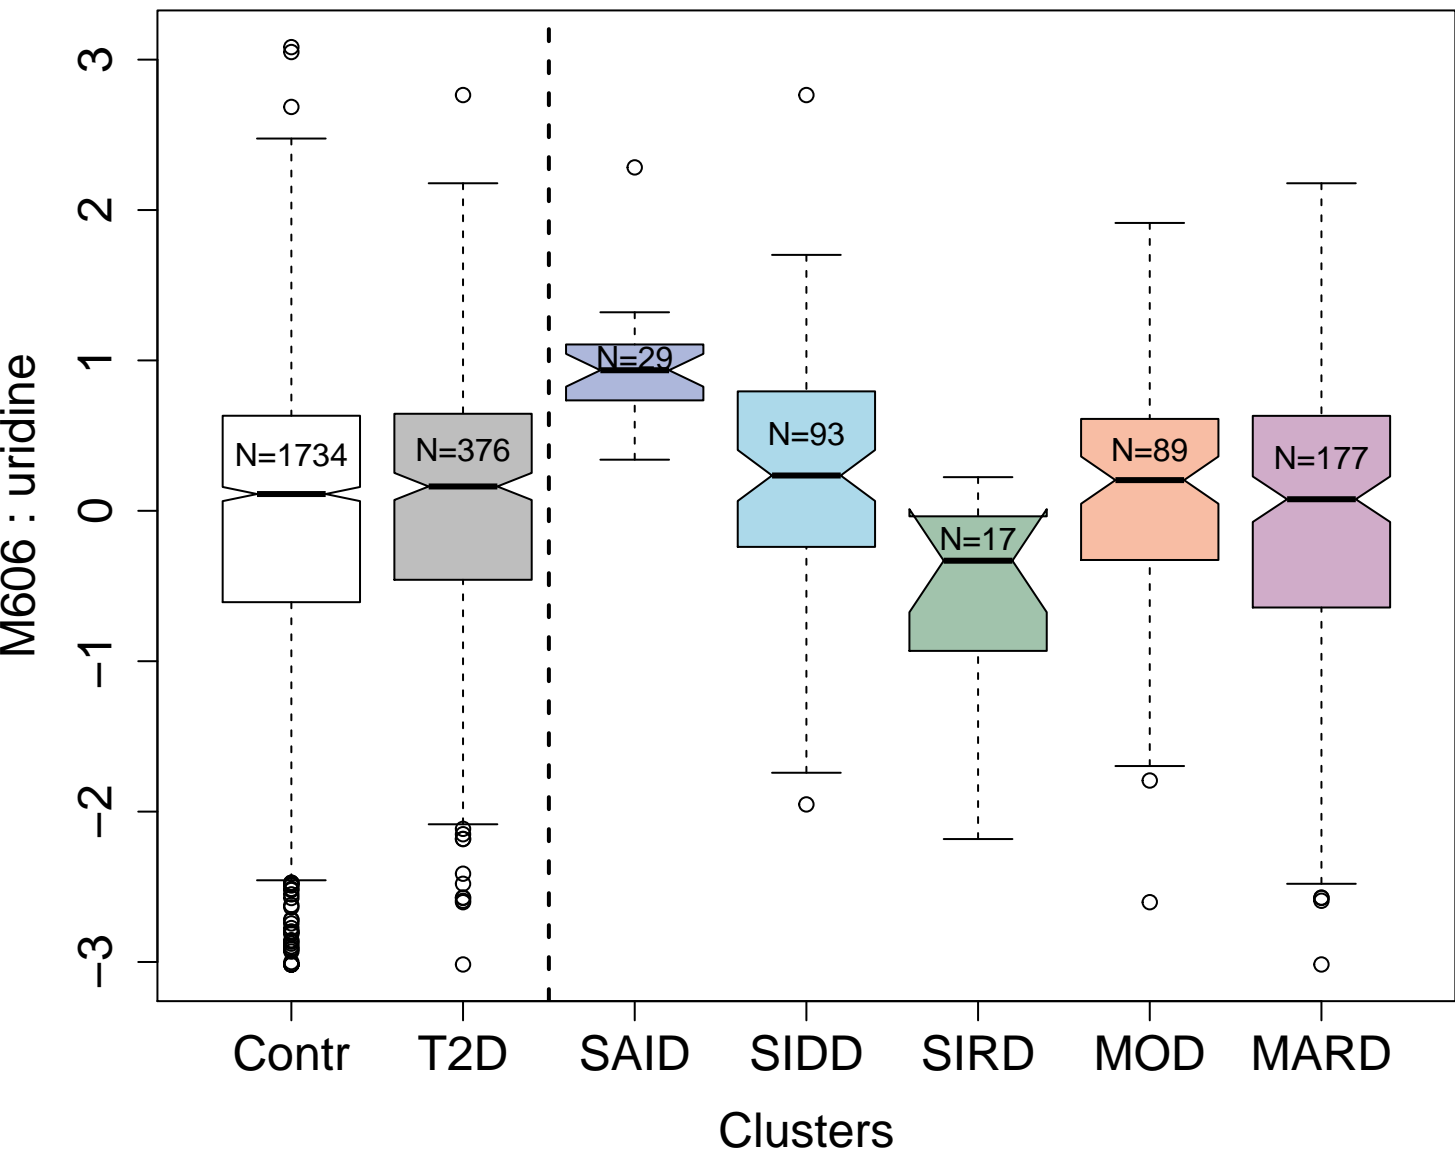



M62104 : gamma-glutamylcitrulline\*

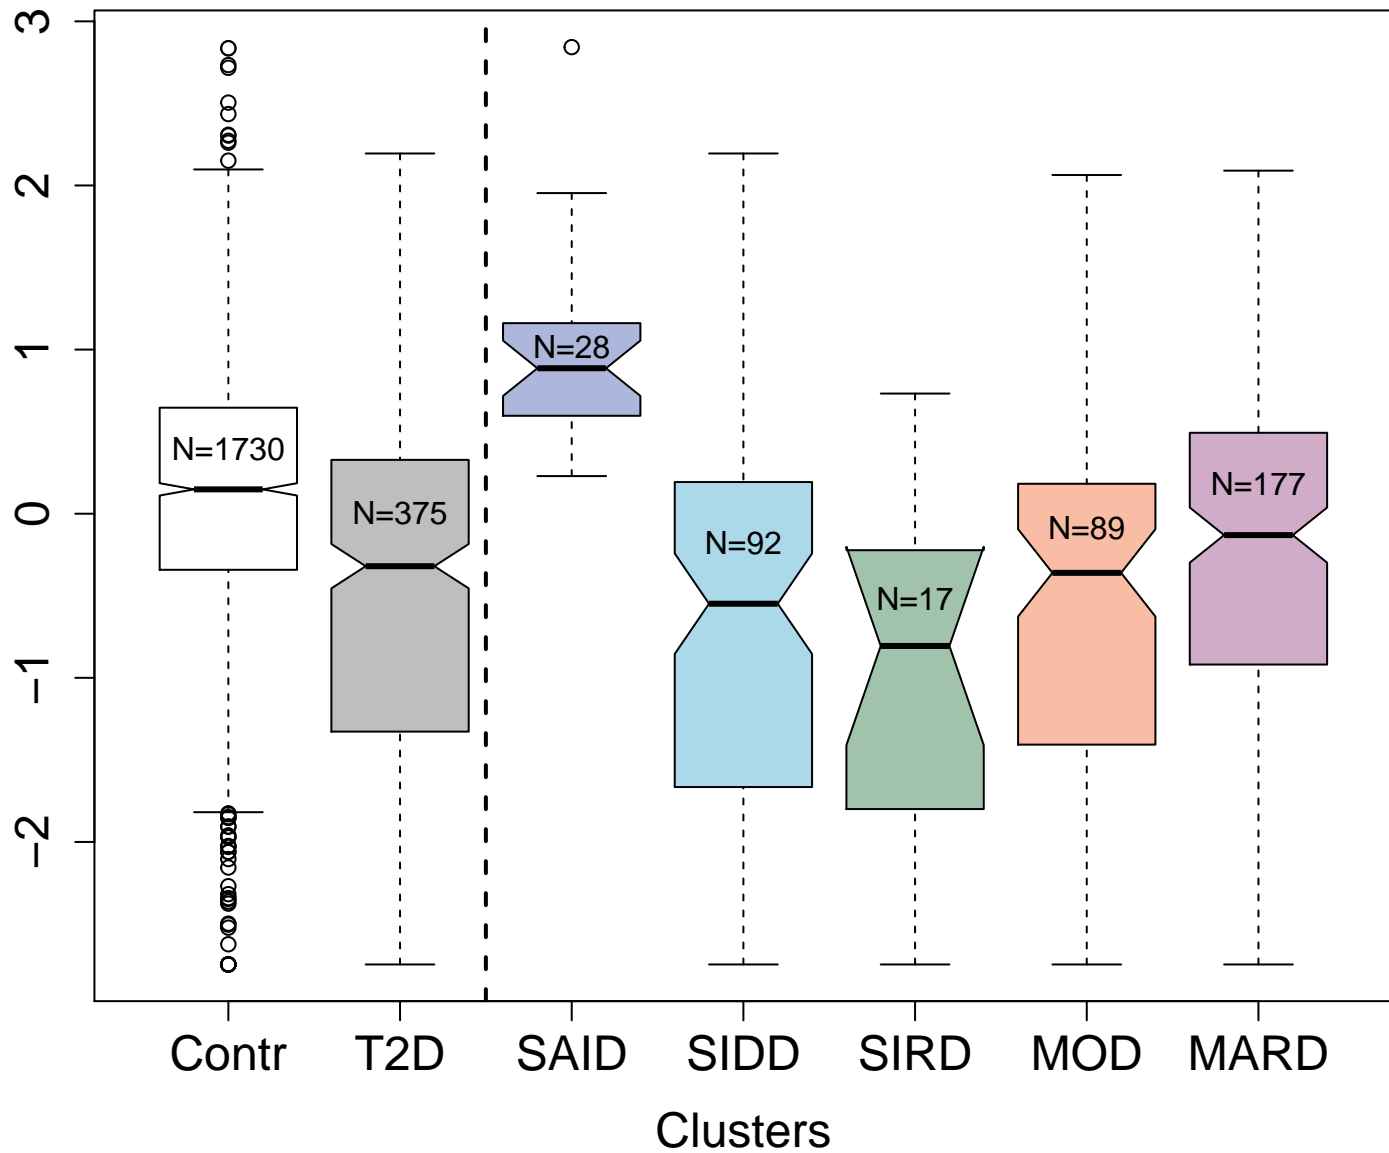

M19258 : 1-myristoyl-2-palmitoyl-GPC (14:0/16:0)

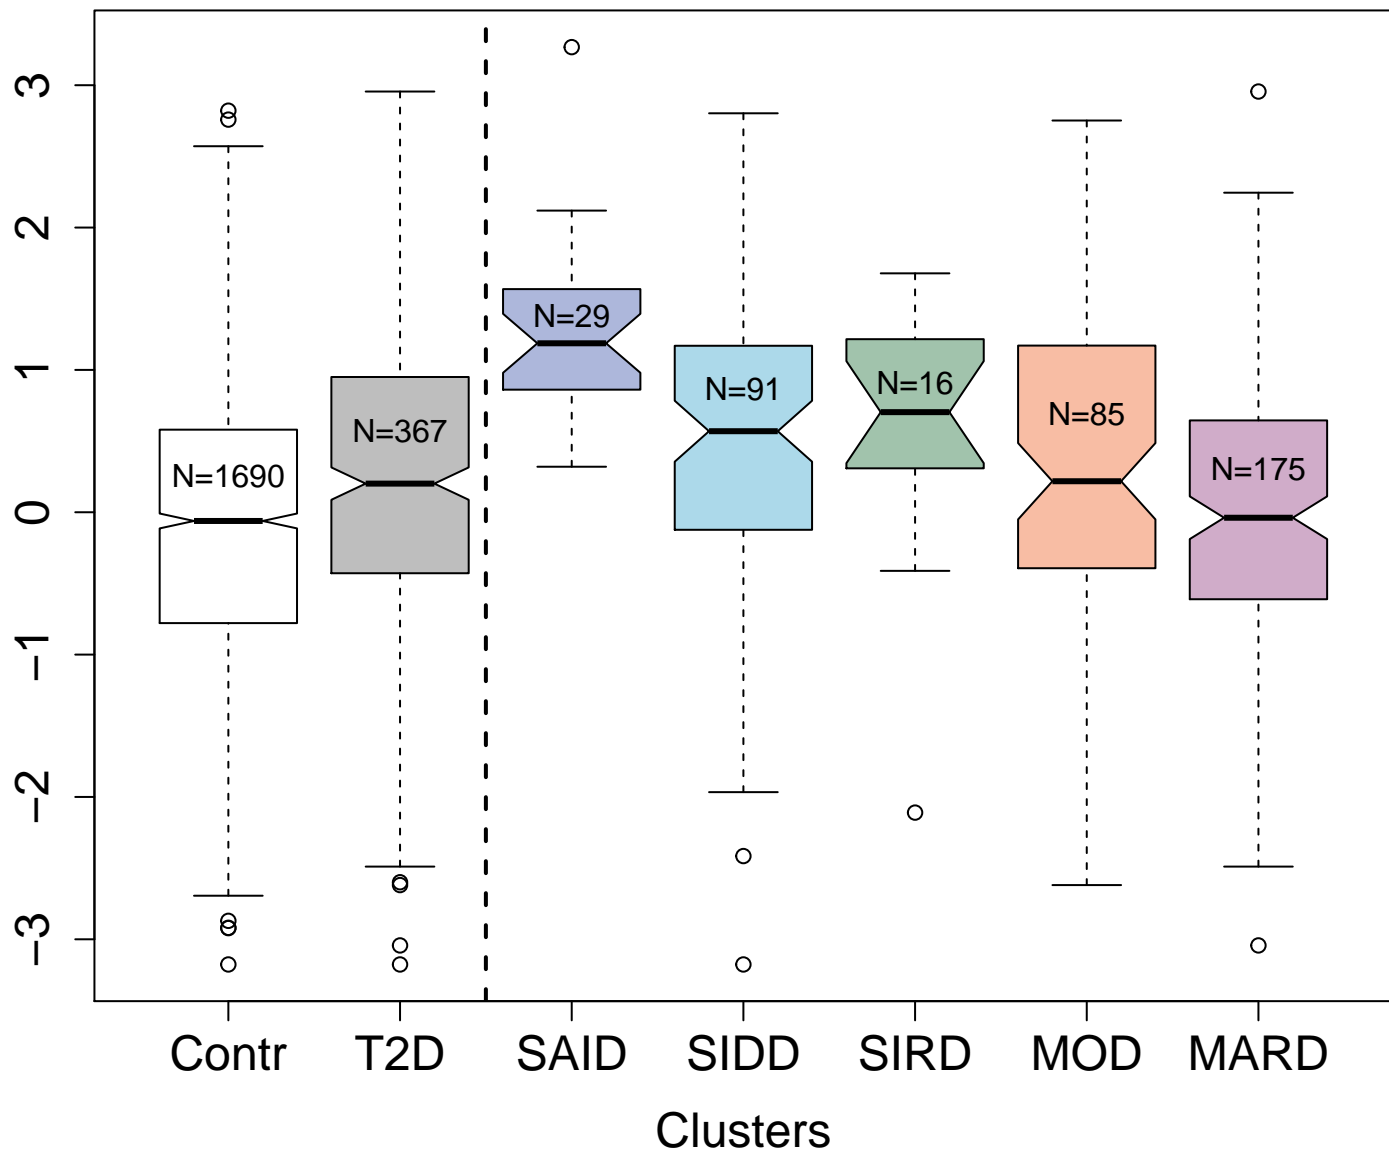

M32306 : trans-4-hydroxyproline

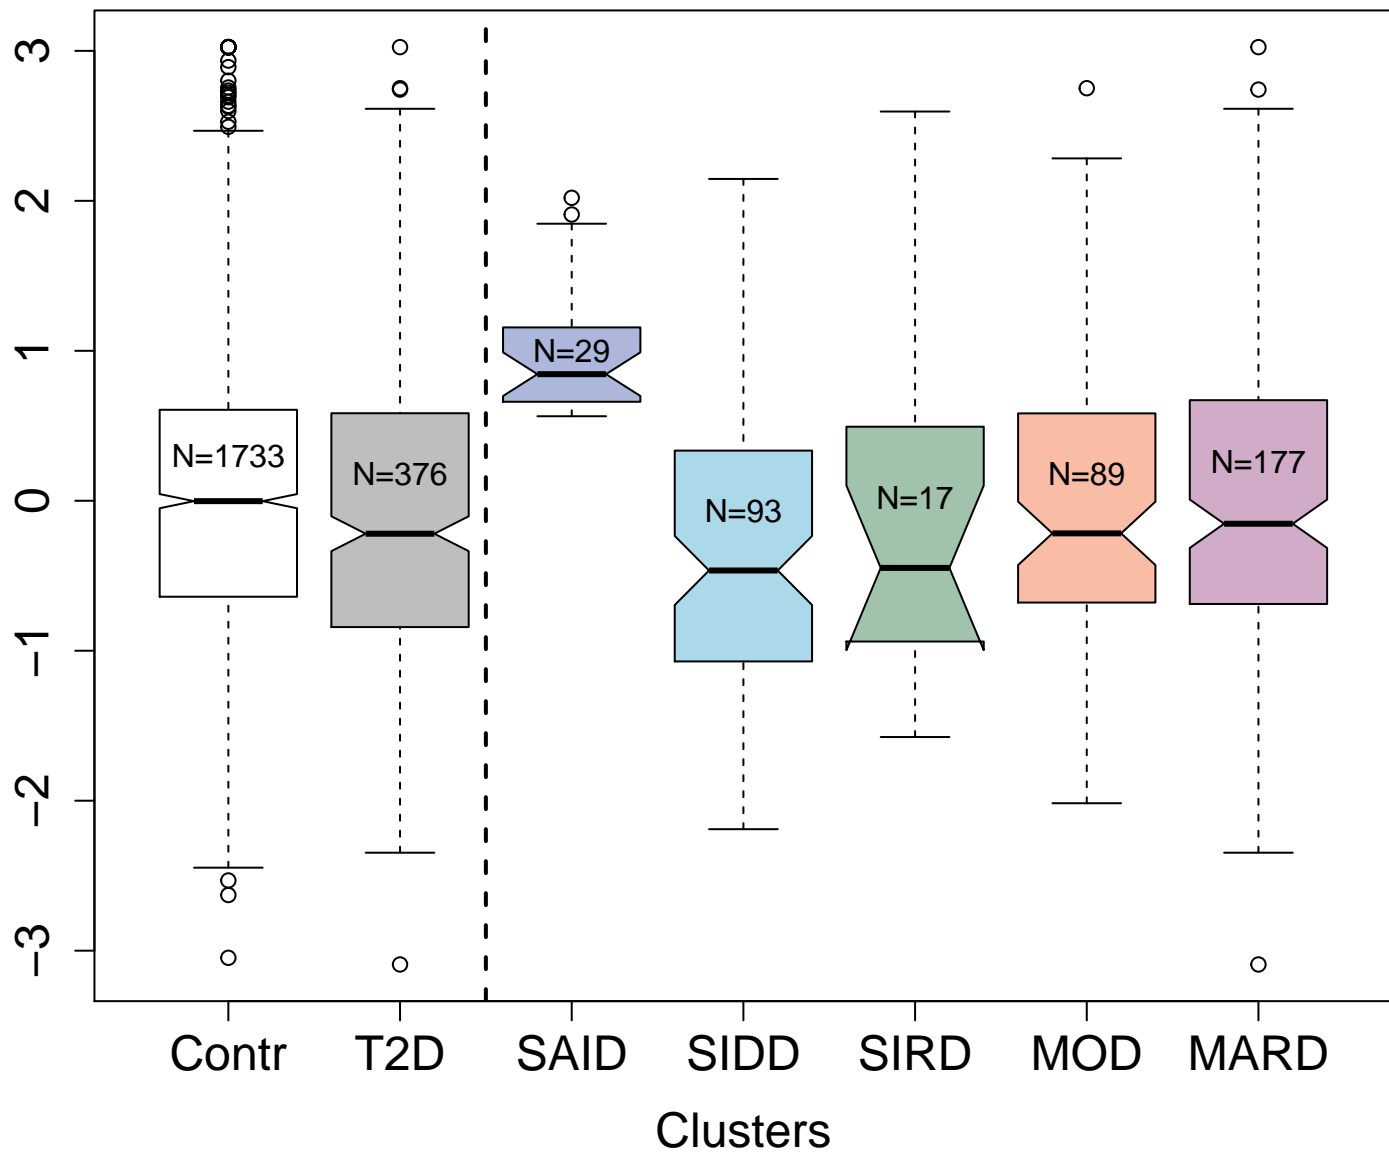

M63264 : pentose acid\*

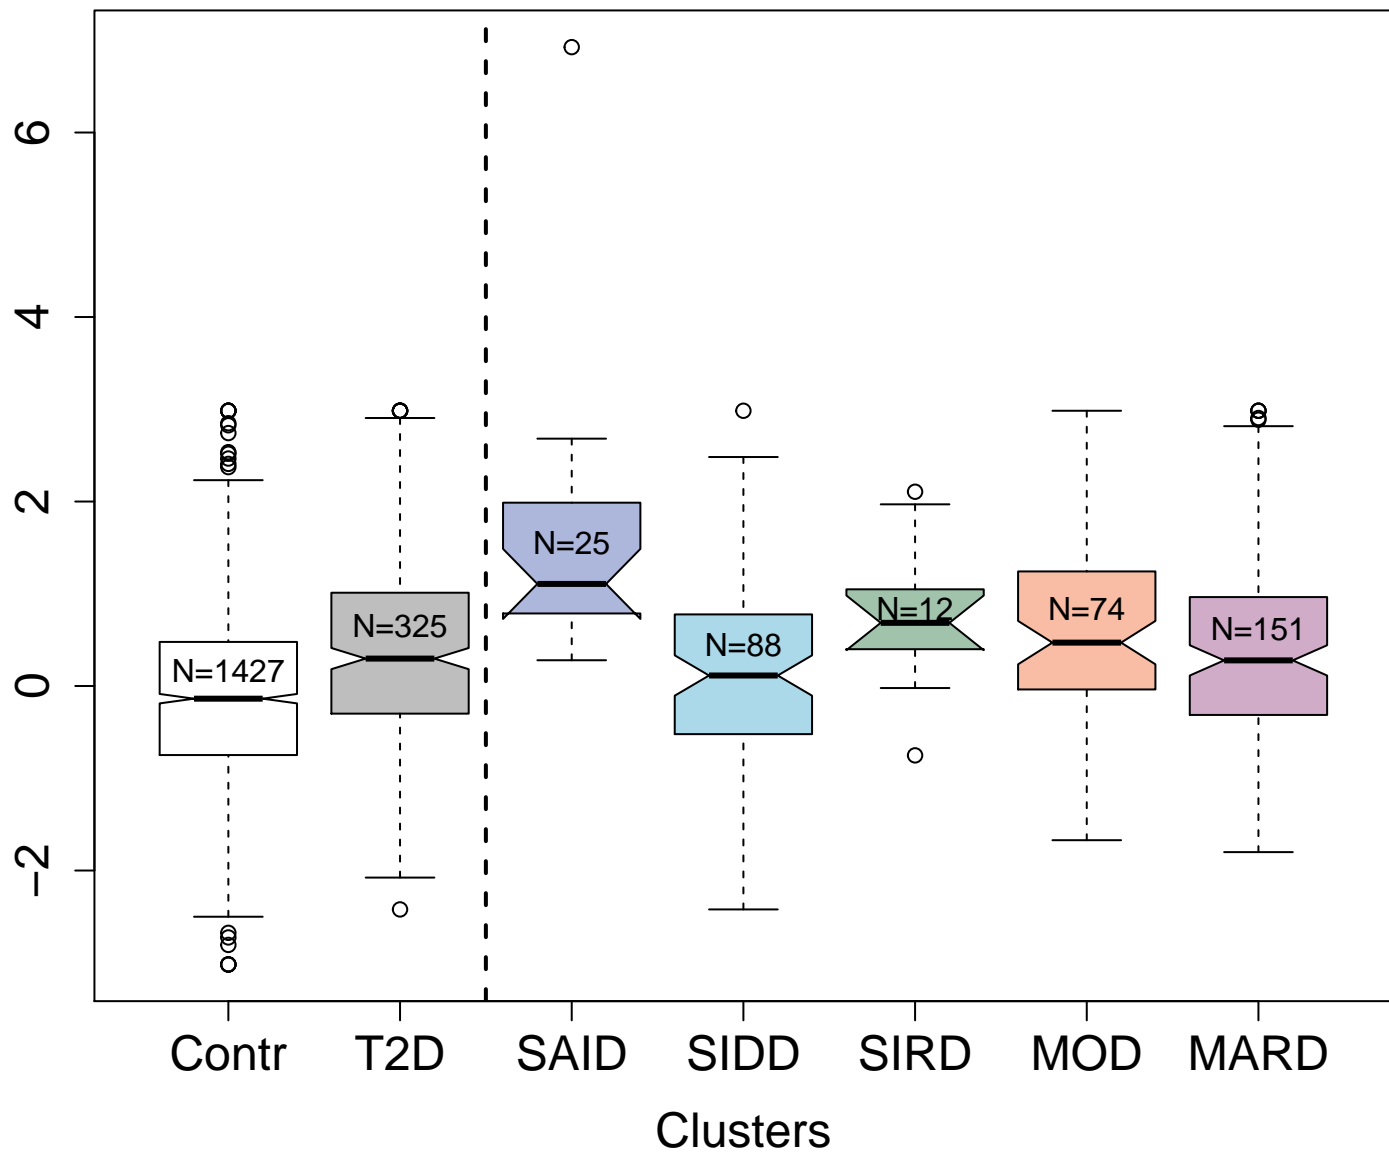

M33009 : homostachydrine\*

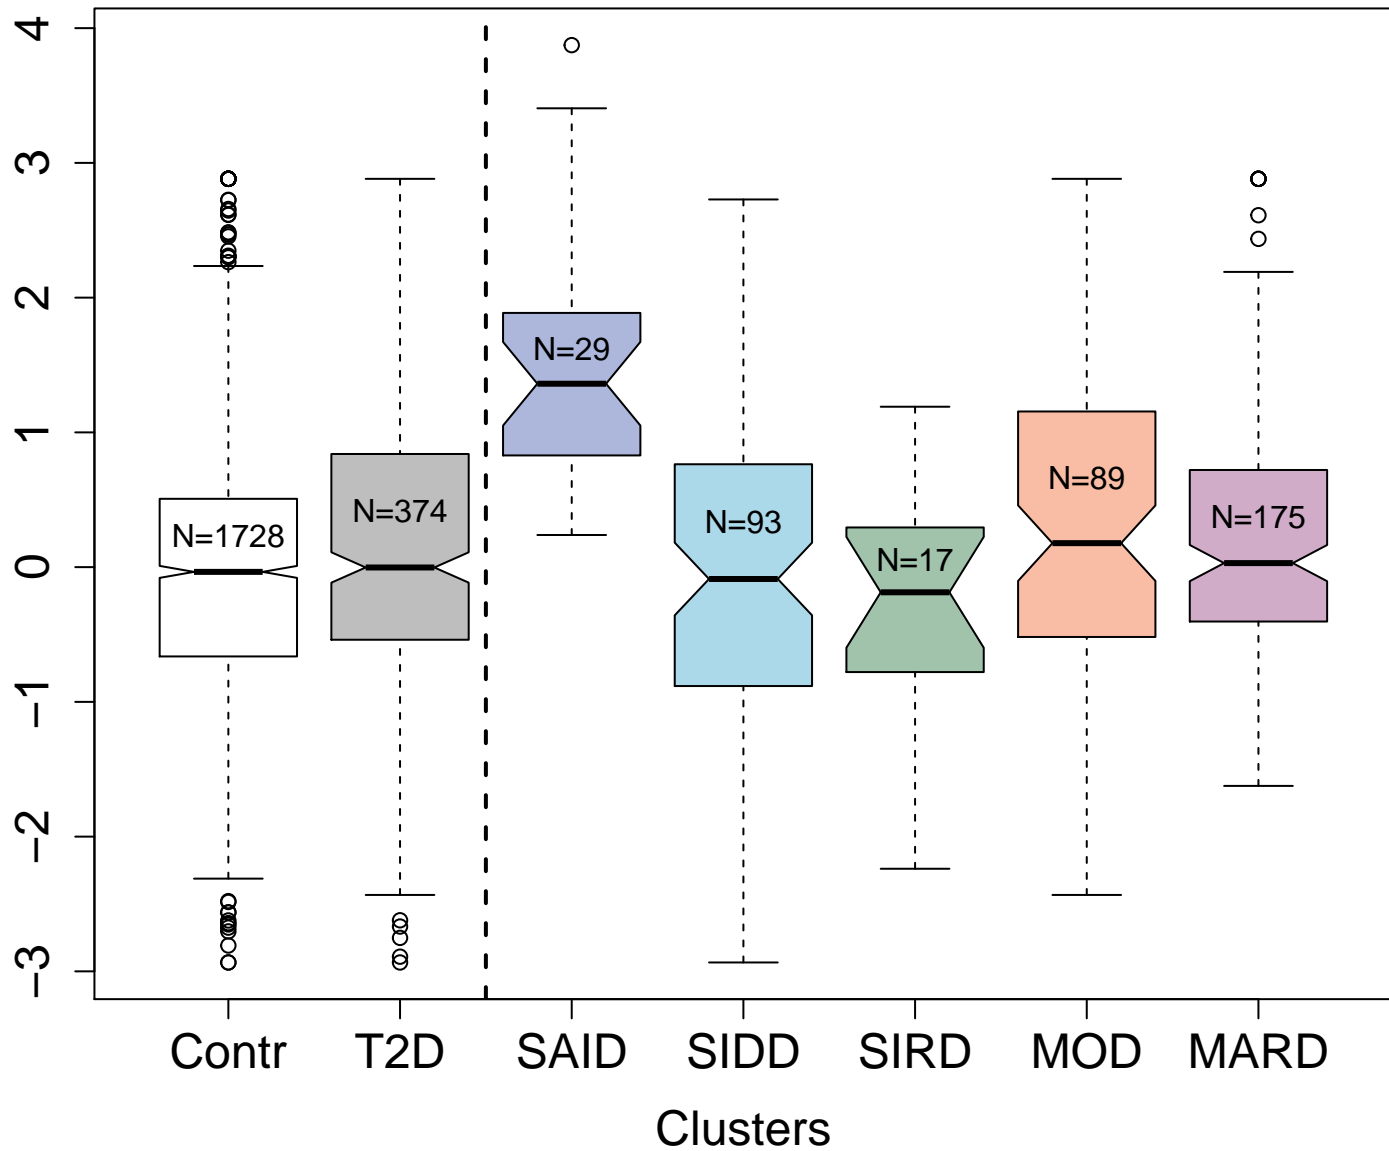

M53230 : 3-hydroxyhexanoate

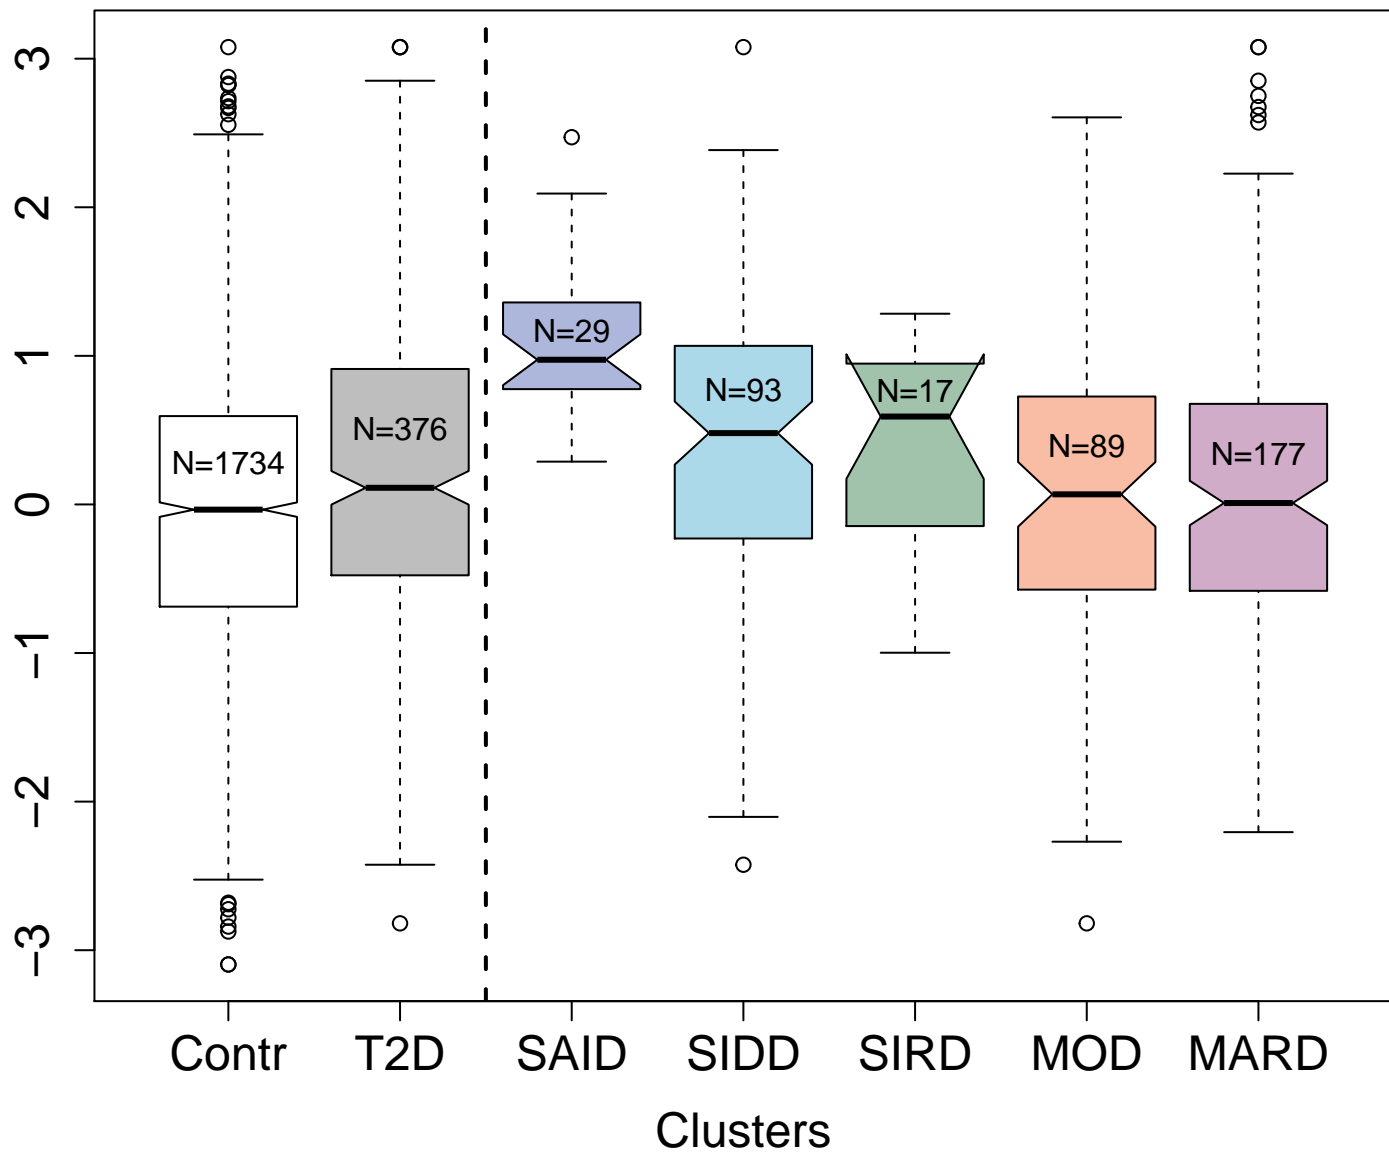

M52461 : 1-palmitoyl-2-oleoyl-GPC (16:0/18:1)

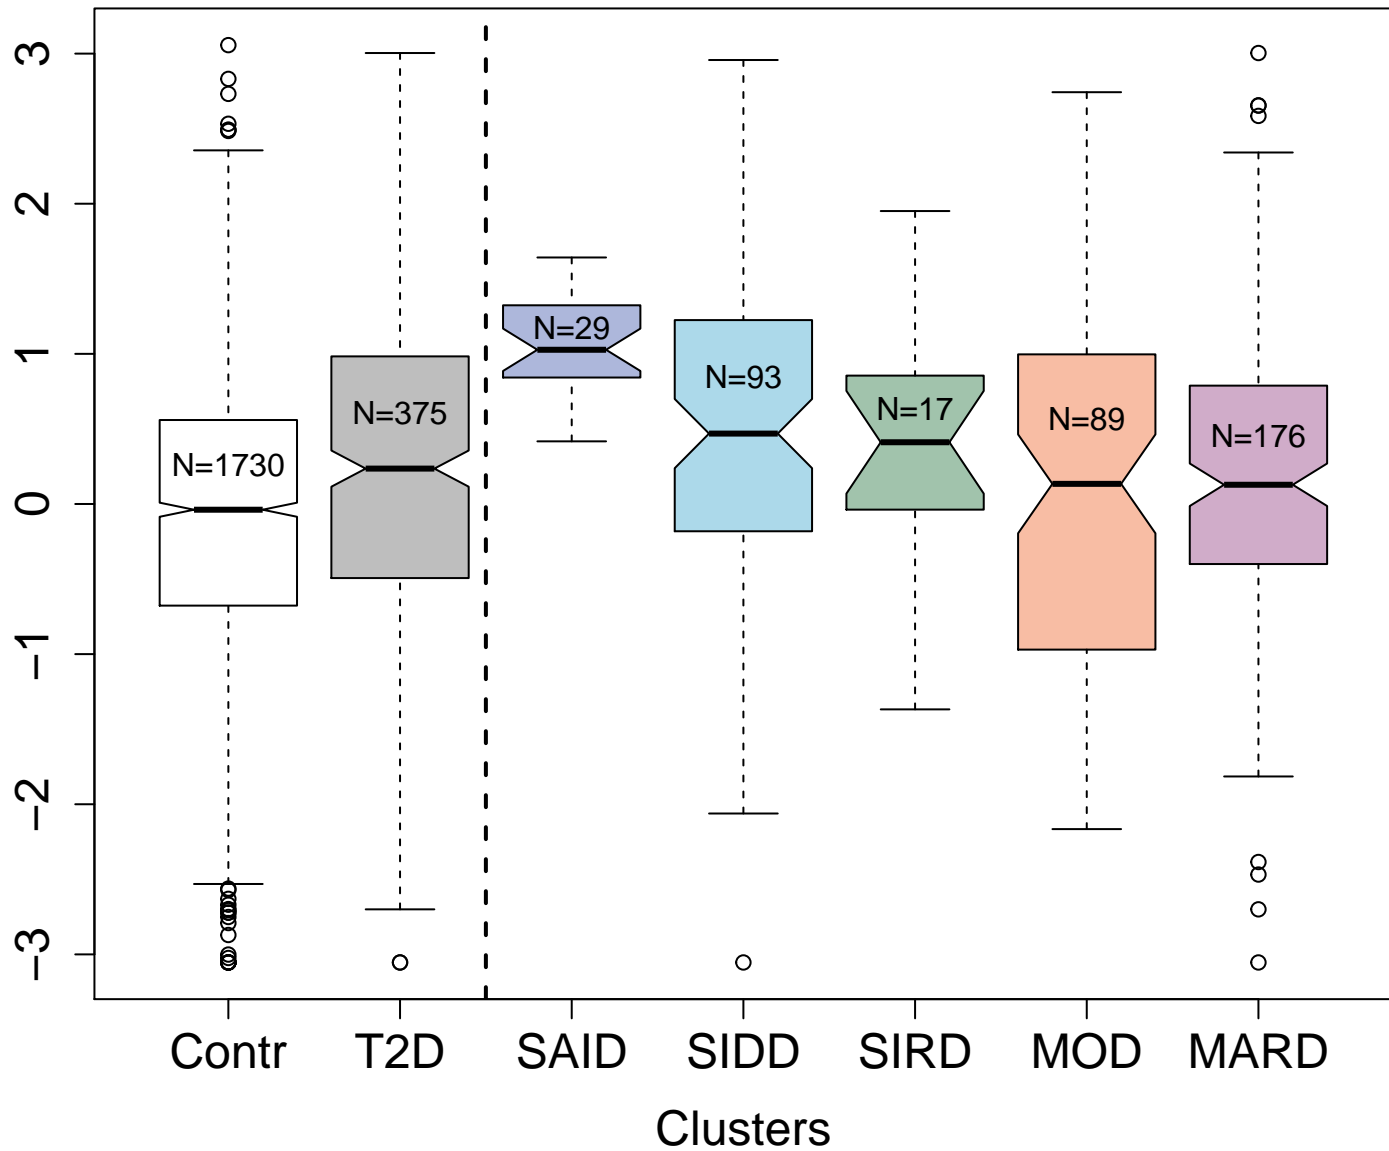

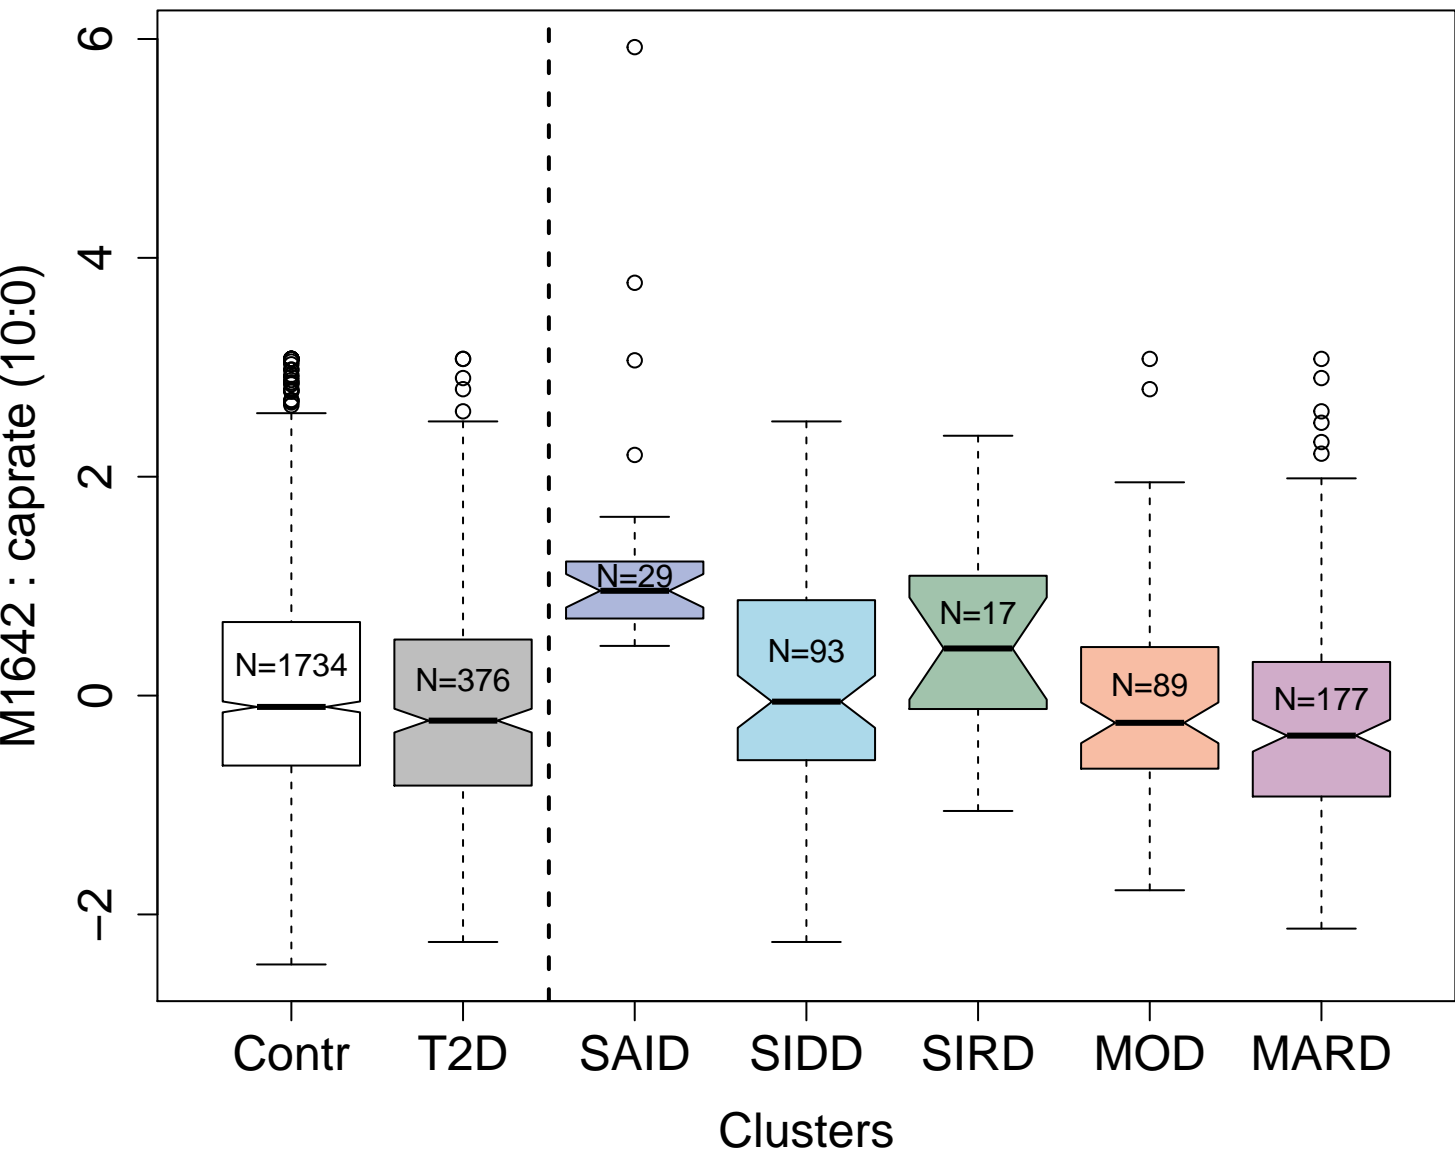



M48130 : N6-succinyladenosine

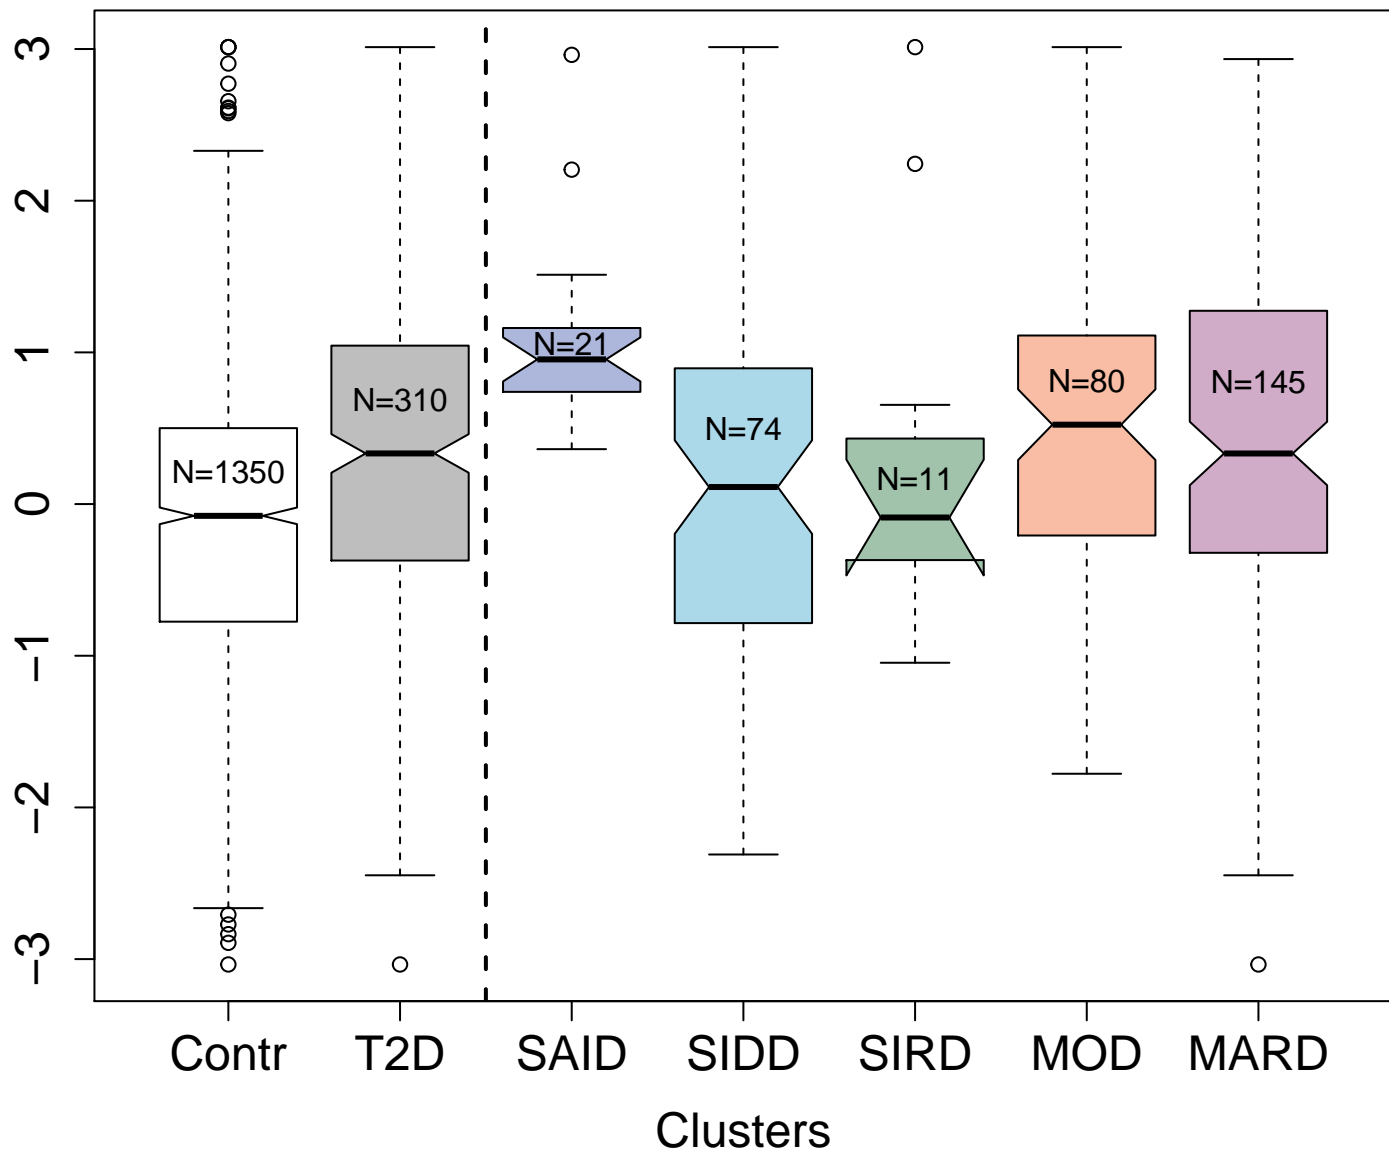

M62064 : 3-hydroxybutyrylglucose\*\*

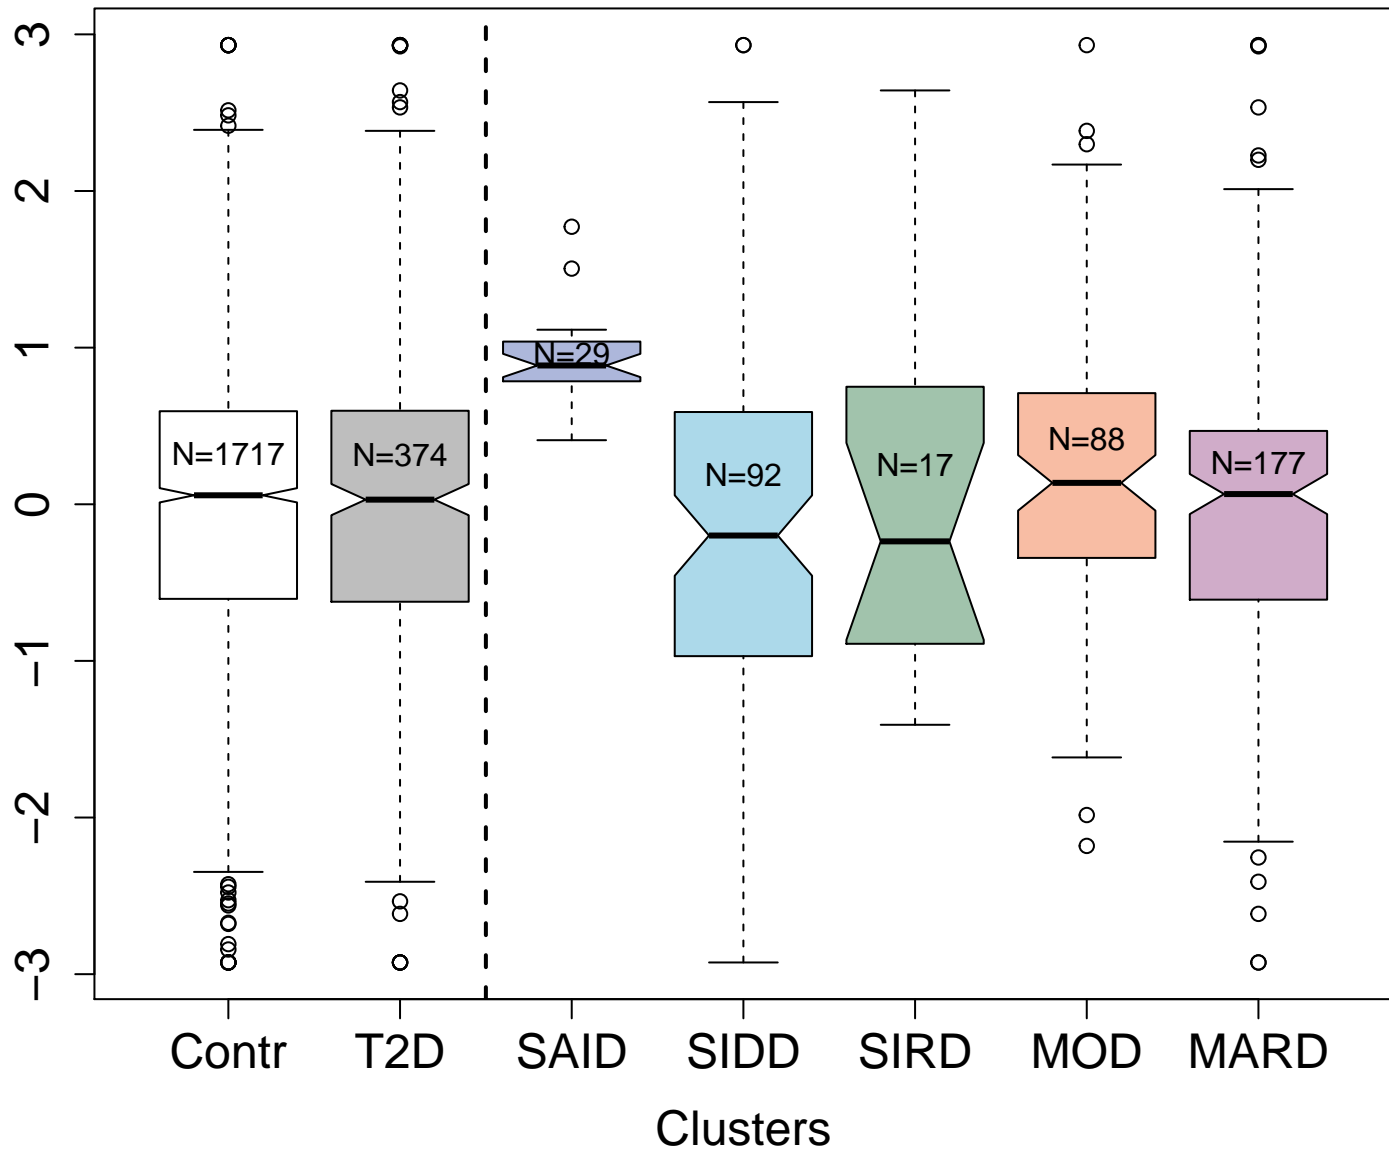

M42459 : sphingomyelin (d18:2/16:0, d18:1/16:1)\*

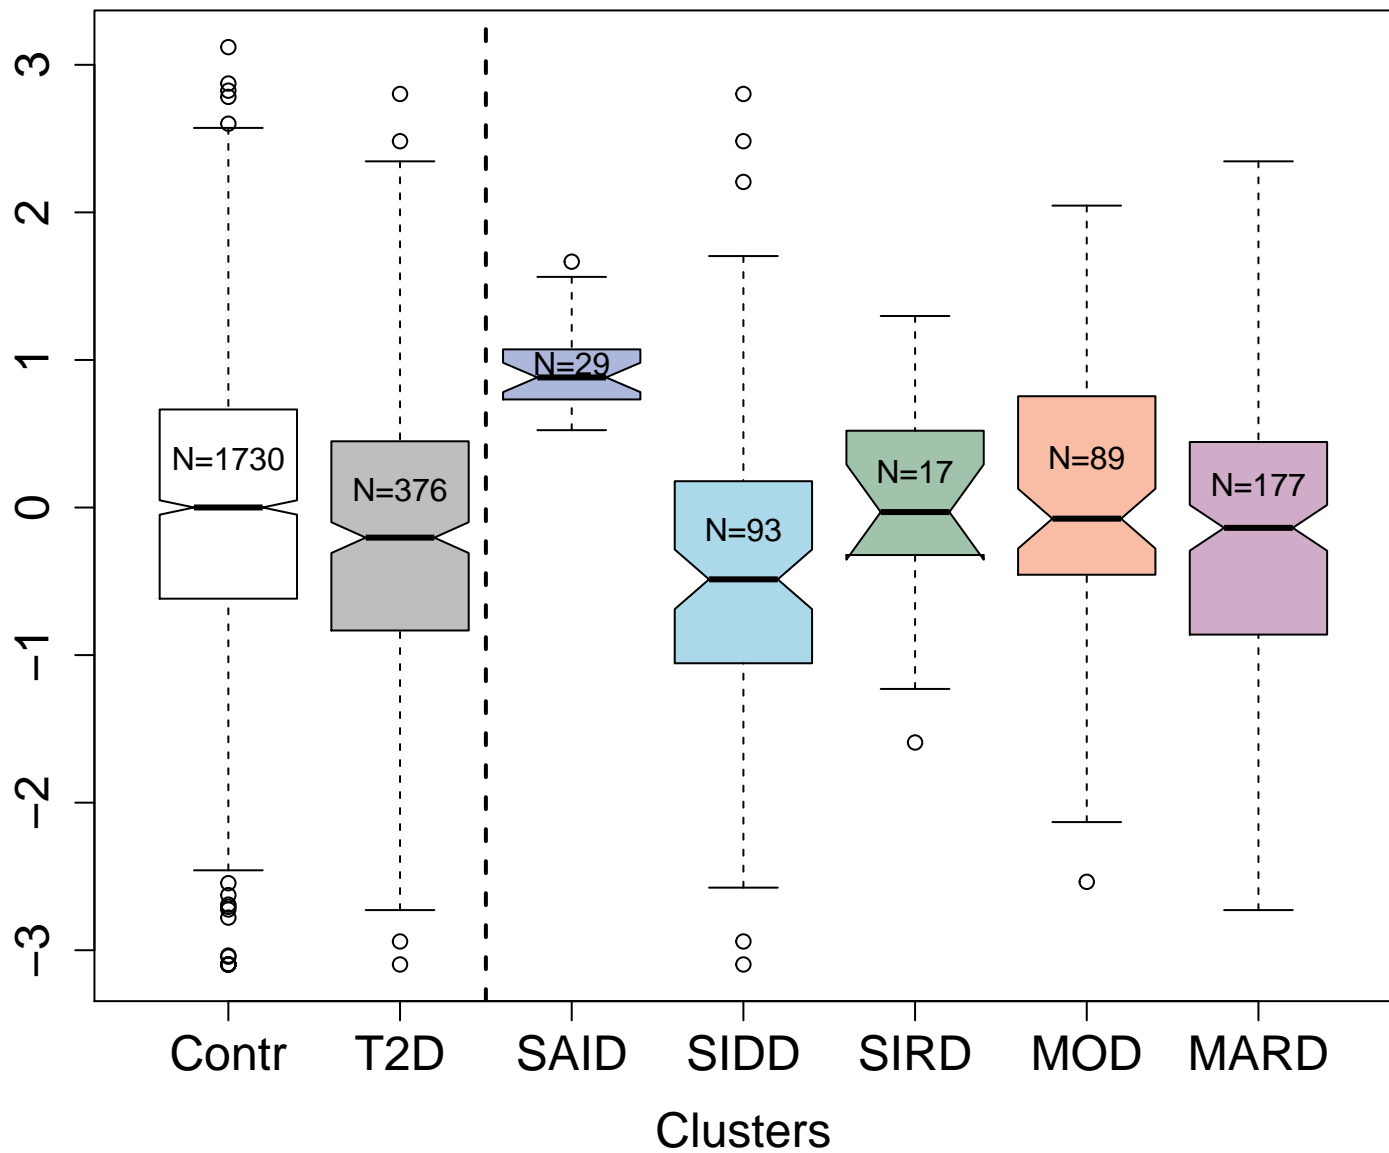

M53262 : diholmo-inolenoyl-chole

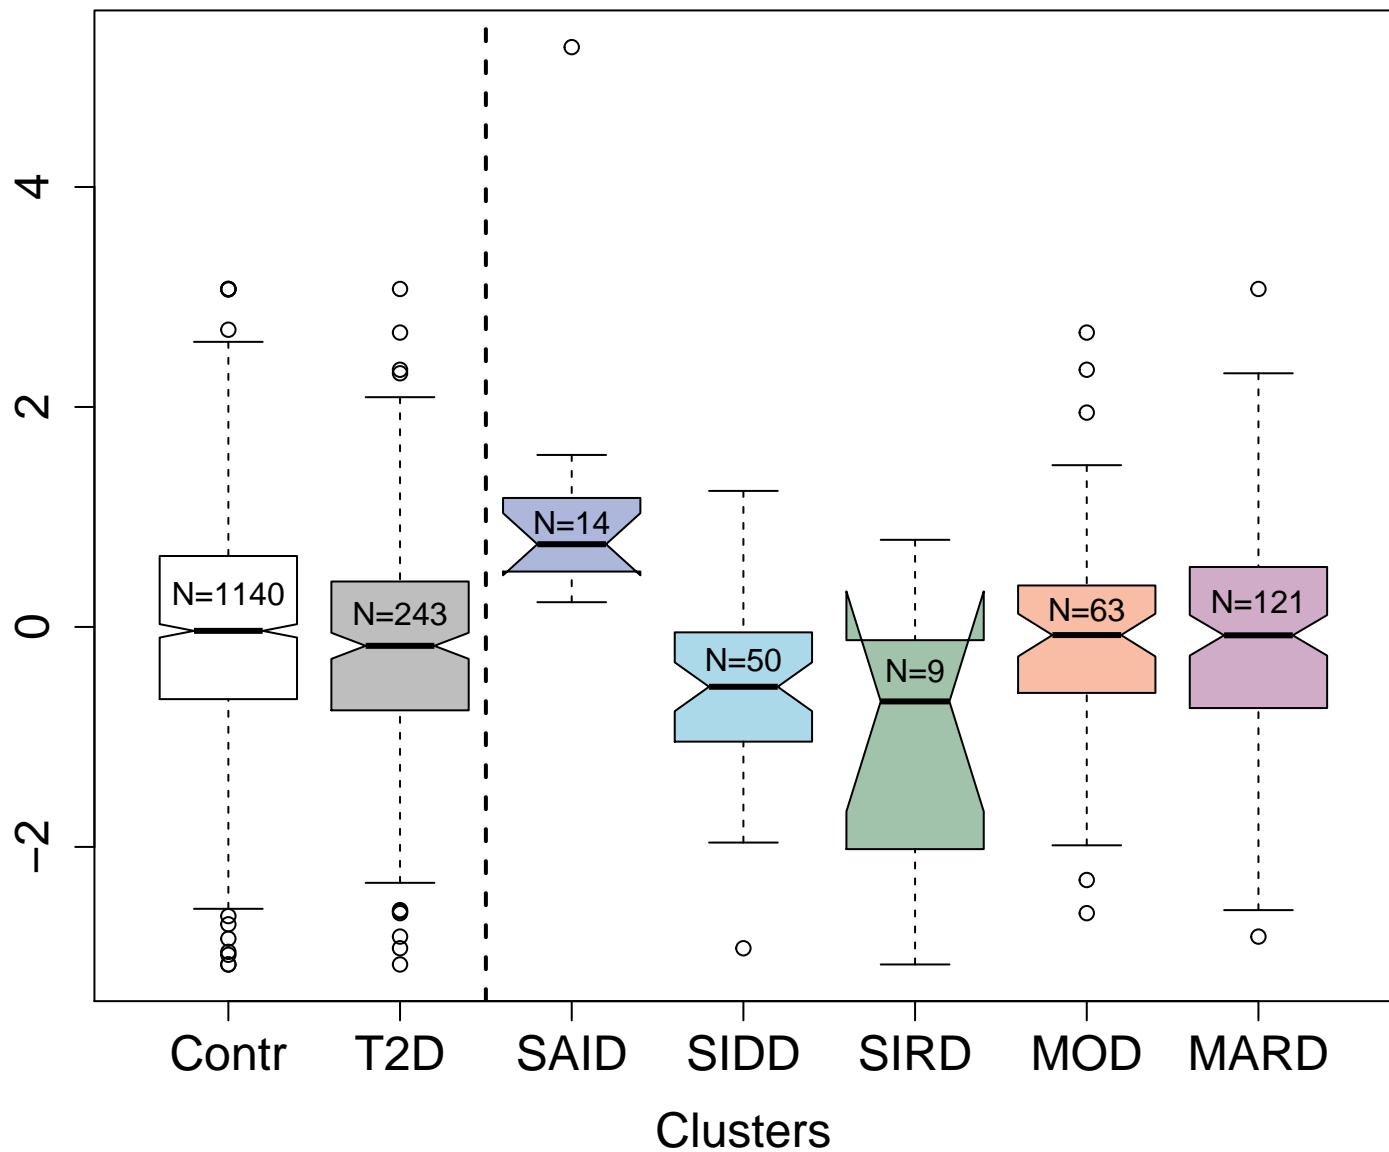

M46905 : X - 21736

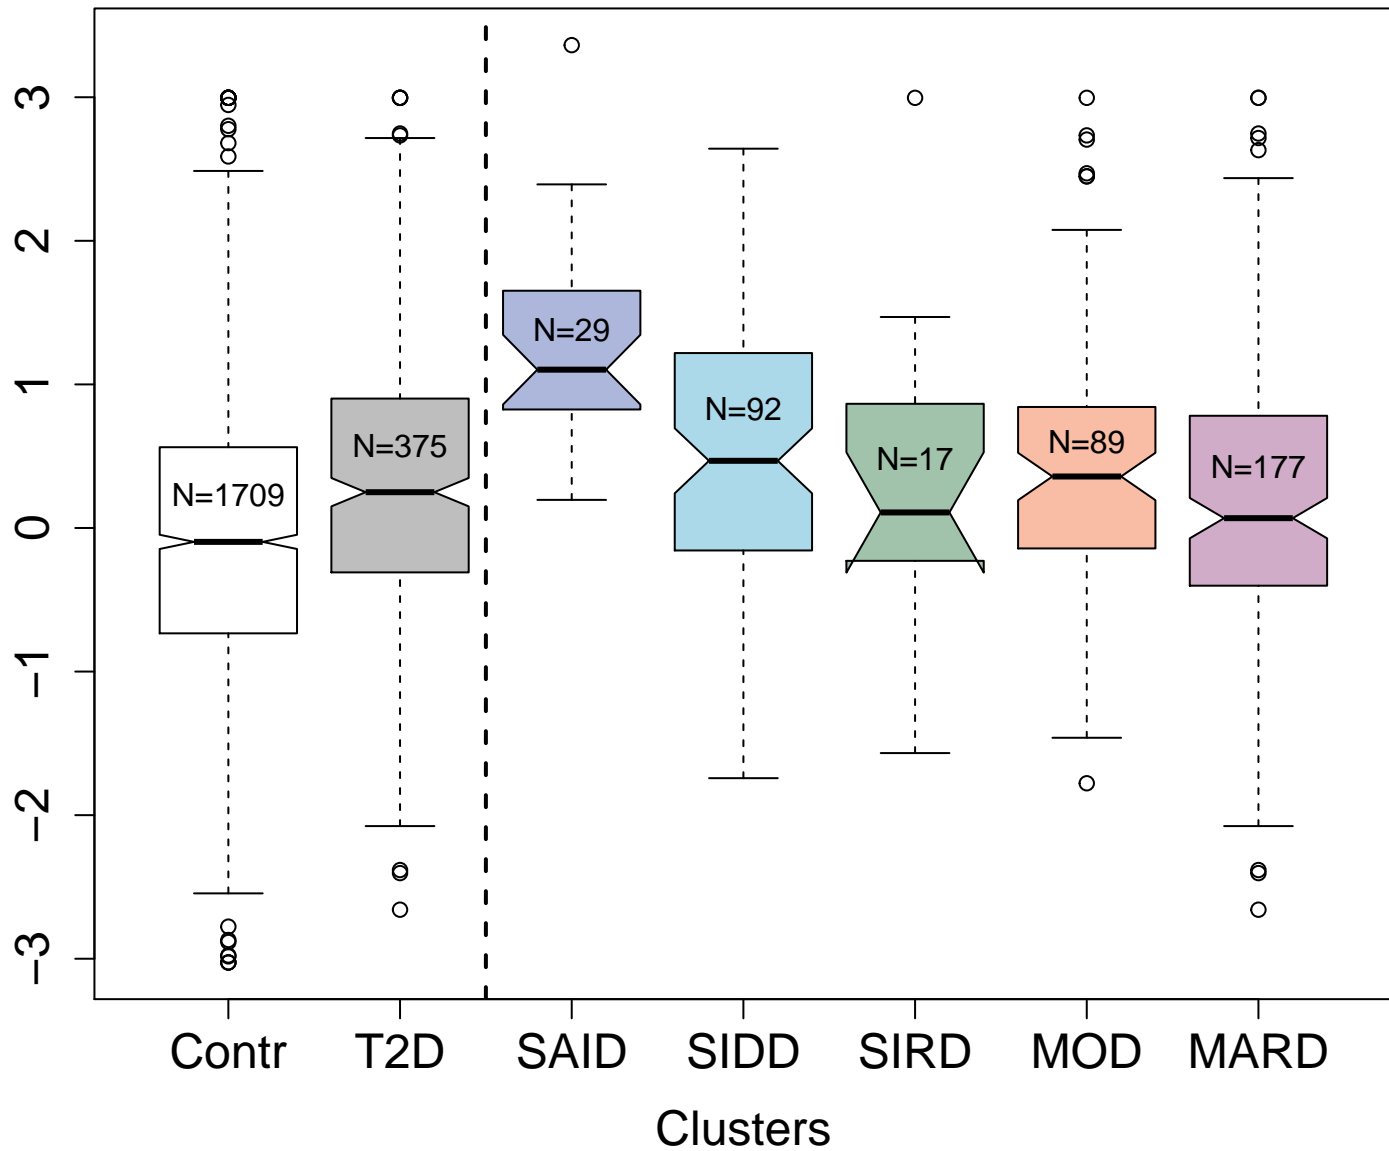

M62068 : N-methylhydroxyproline\*\*

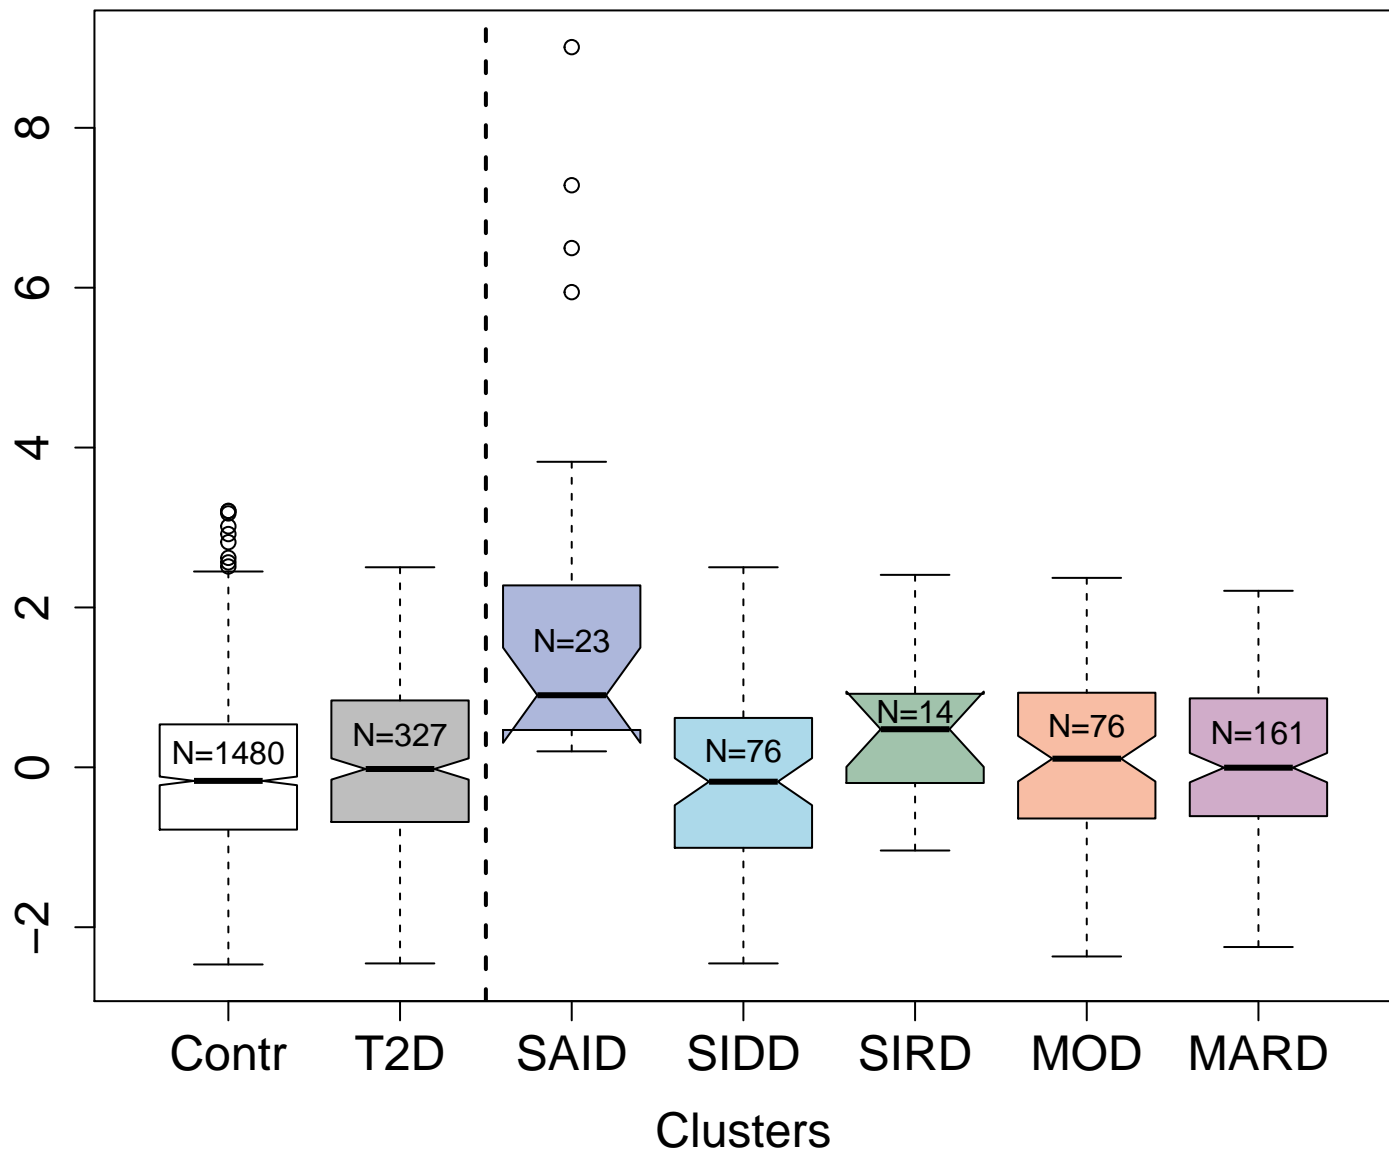

M33936 : octanoylcarnitine (C8)

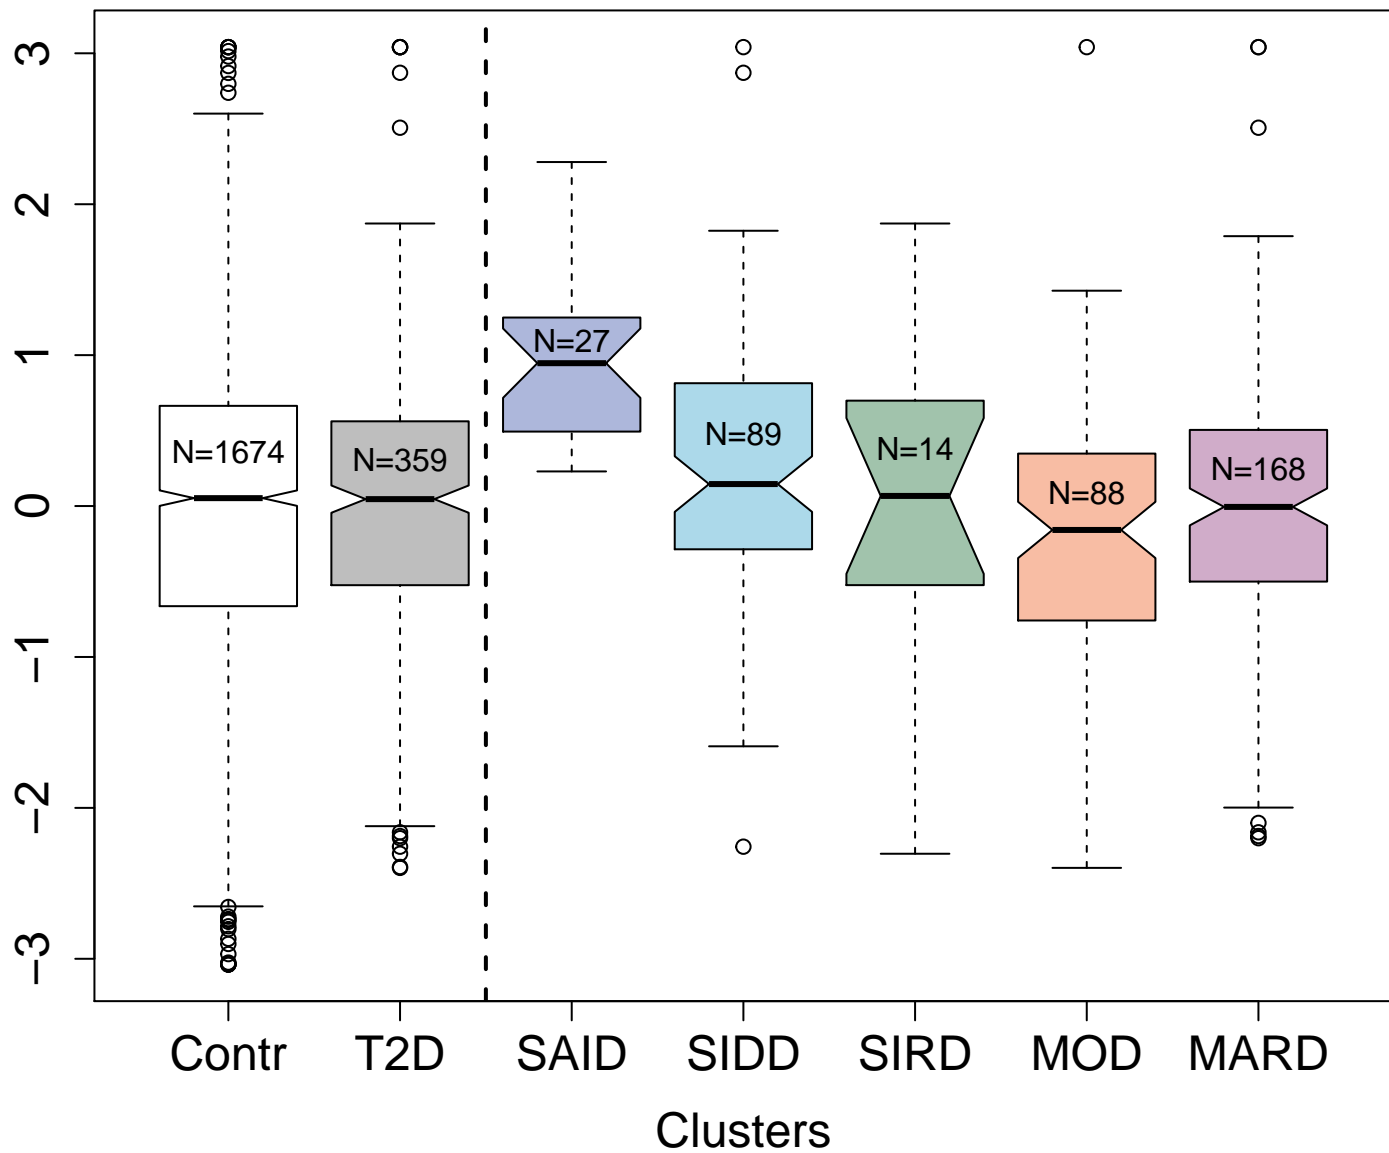

M46957 : gulonate\*

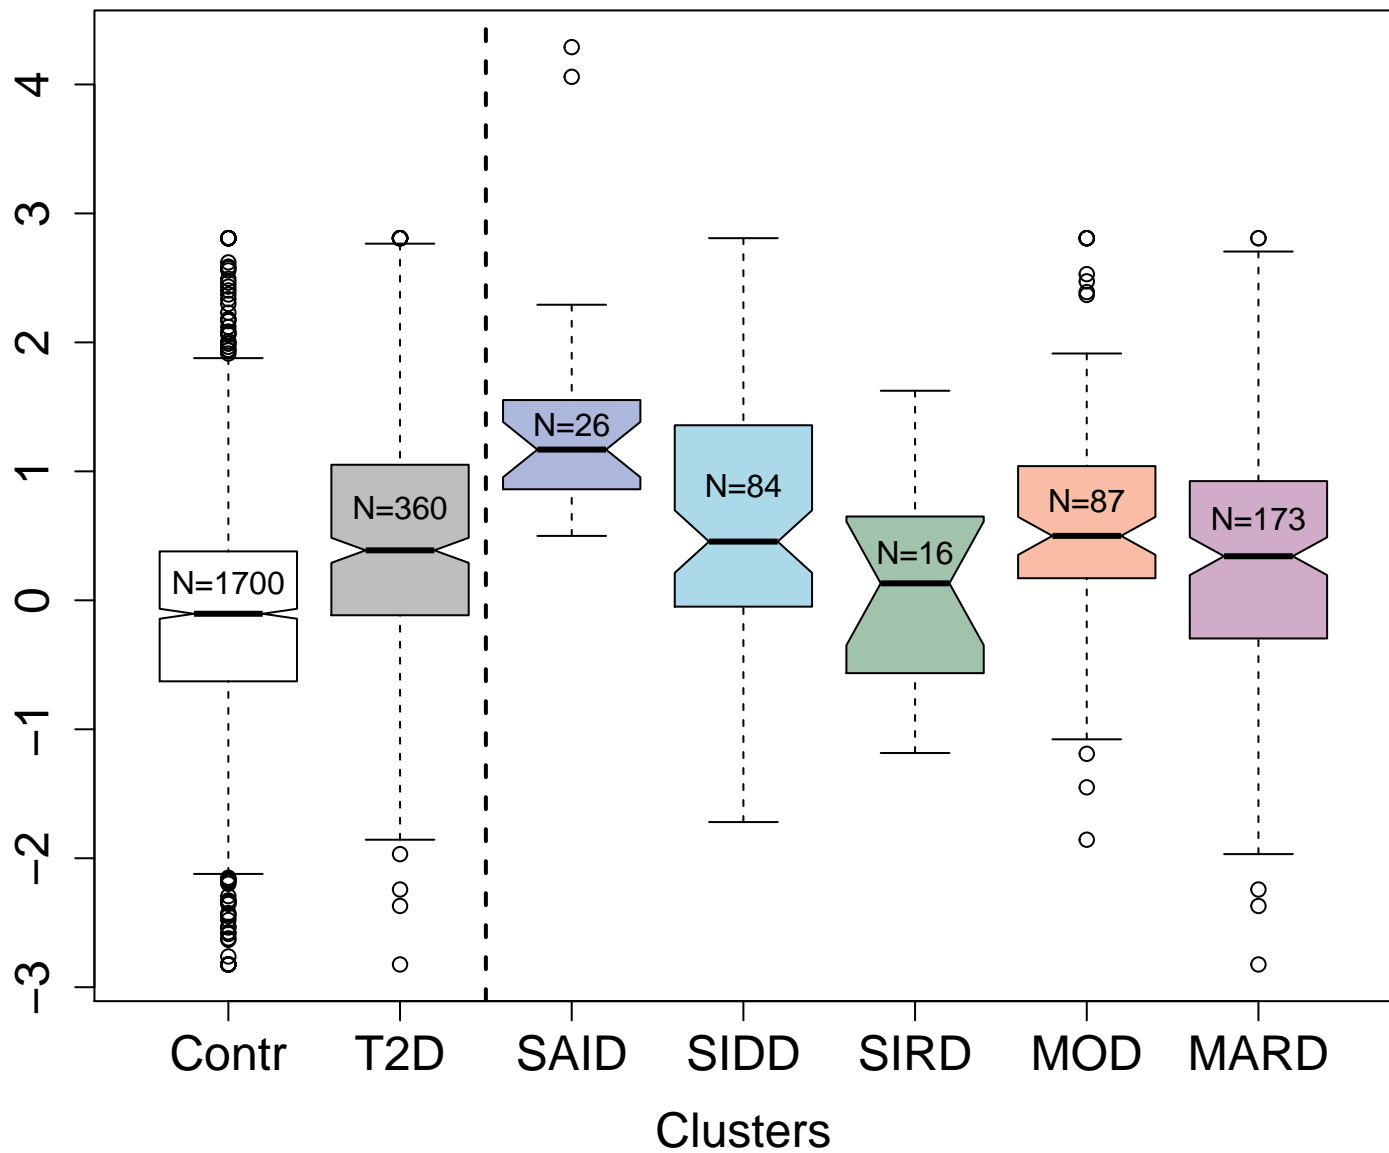



M46909 : X - 21740

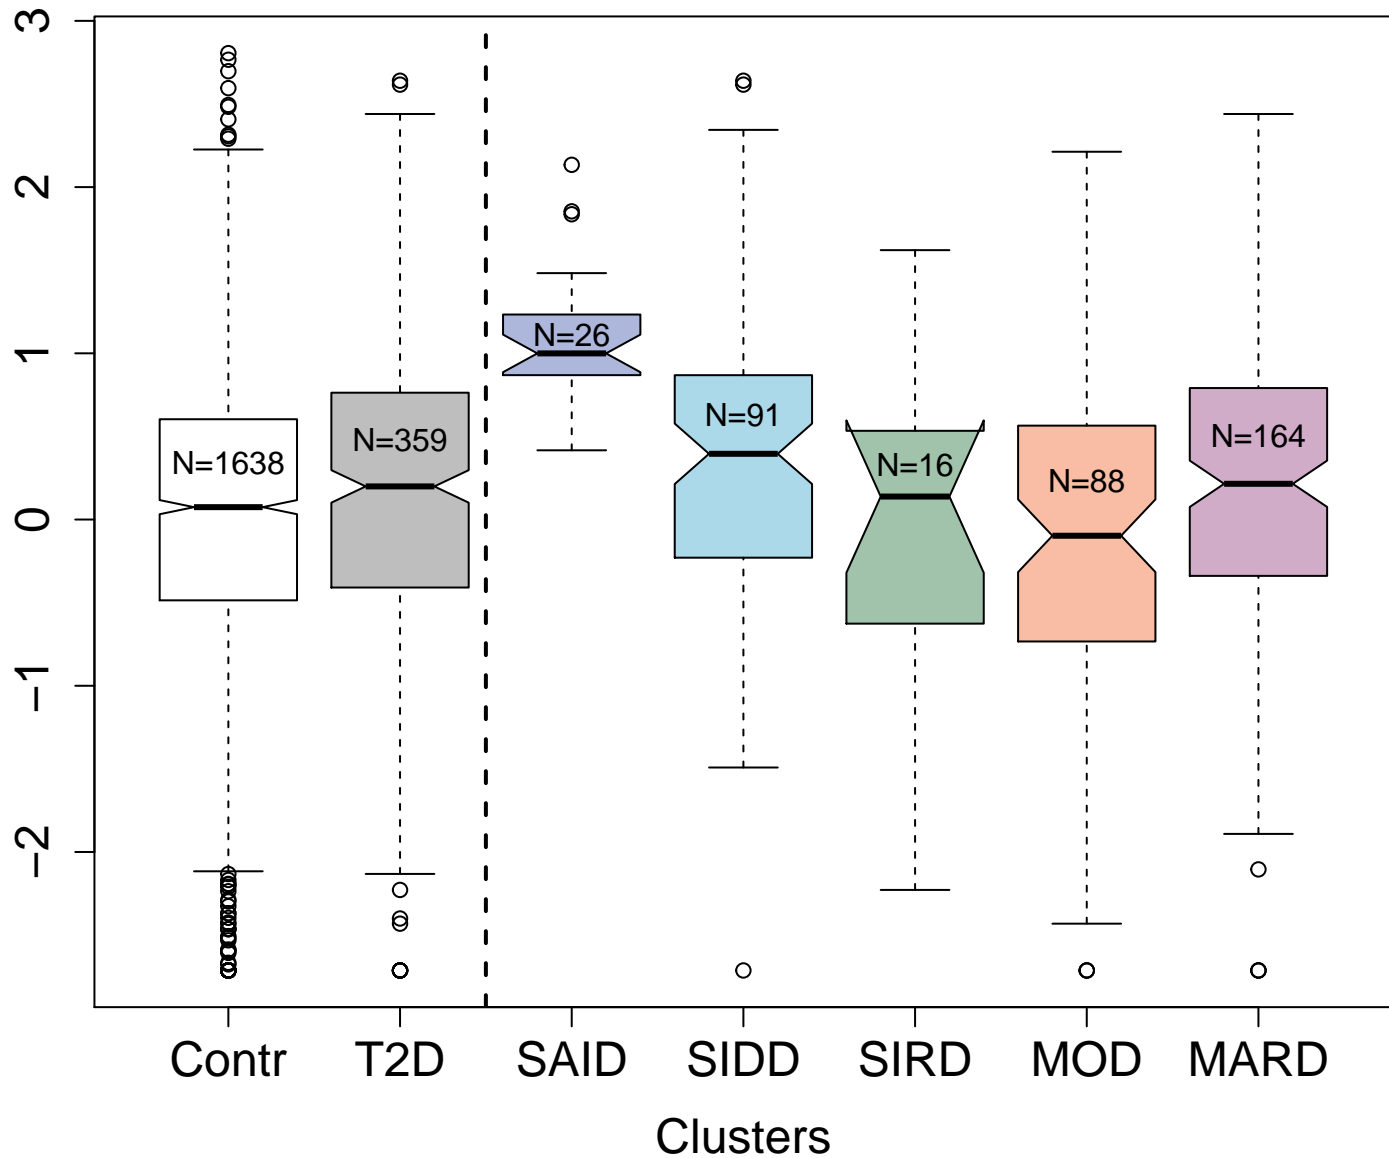

M47006 : X - 21829

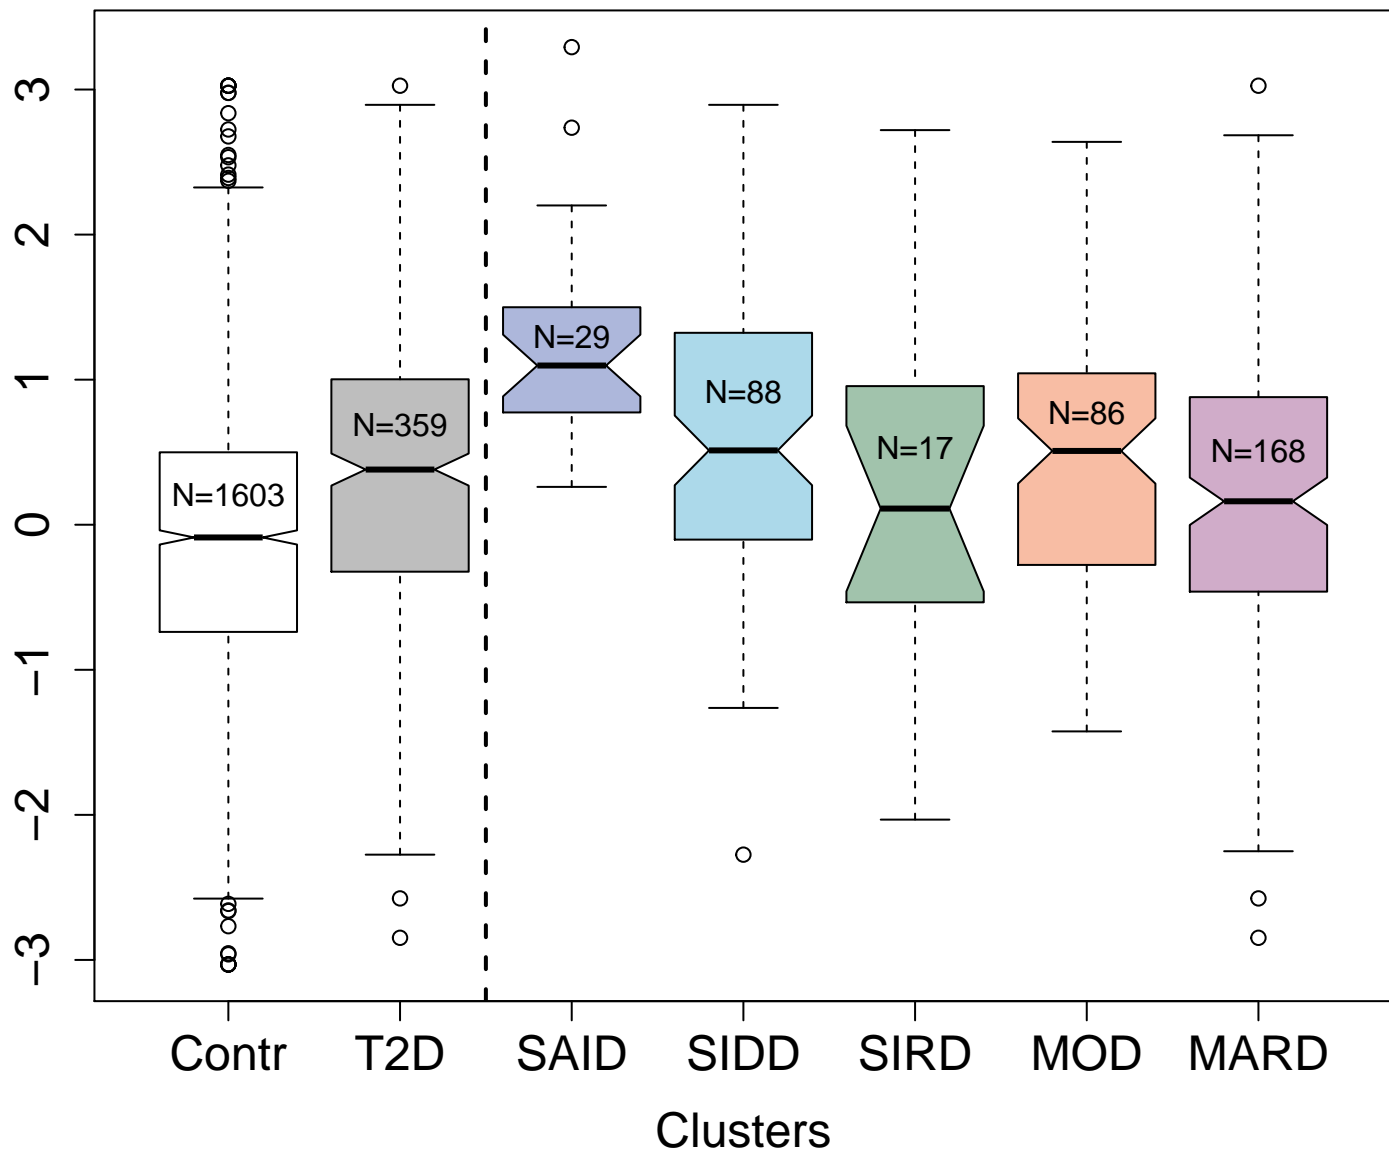

M49515 : X - 23639

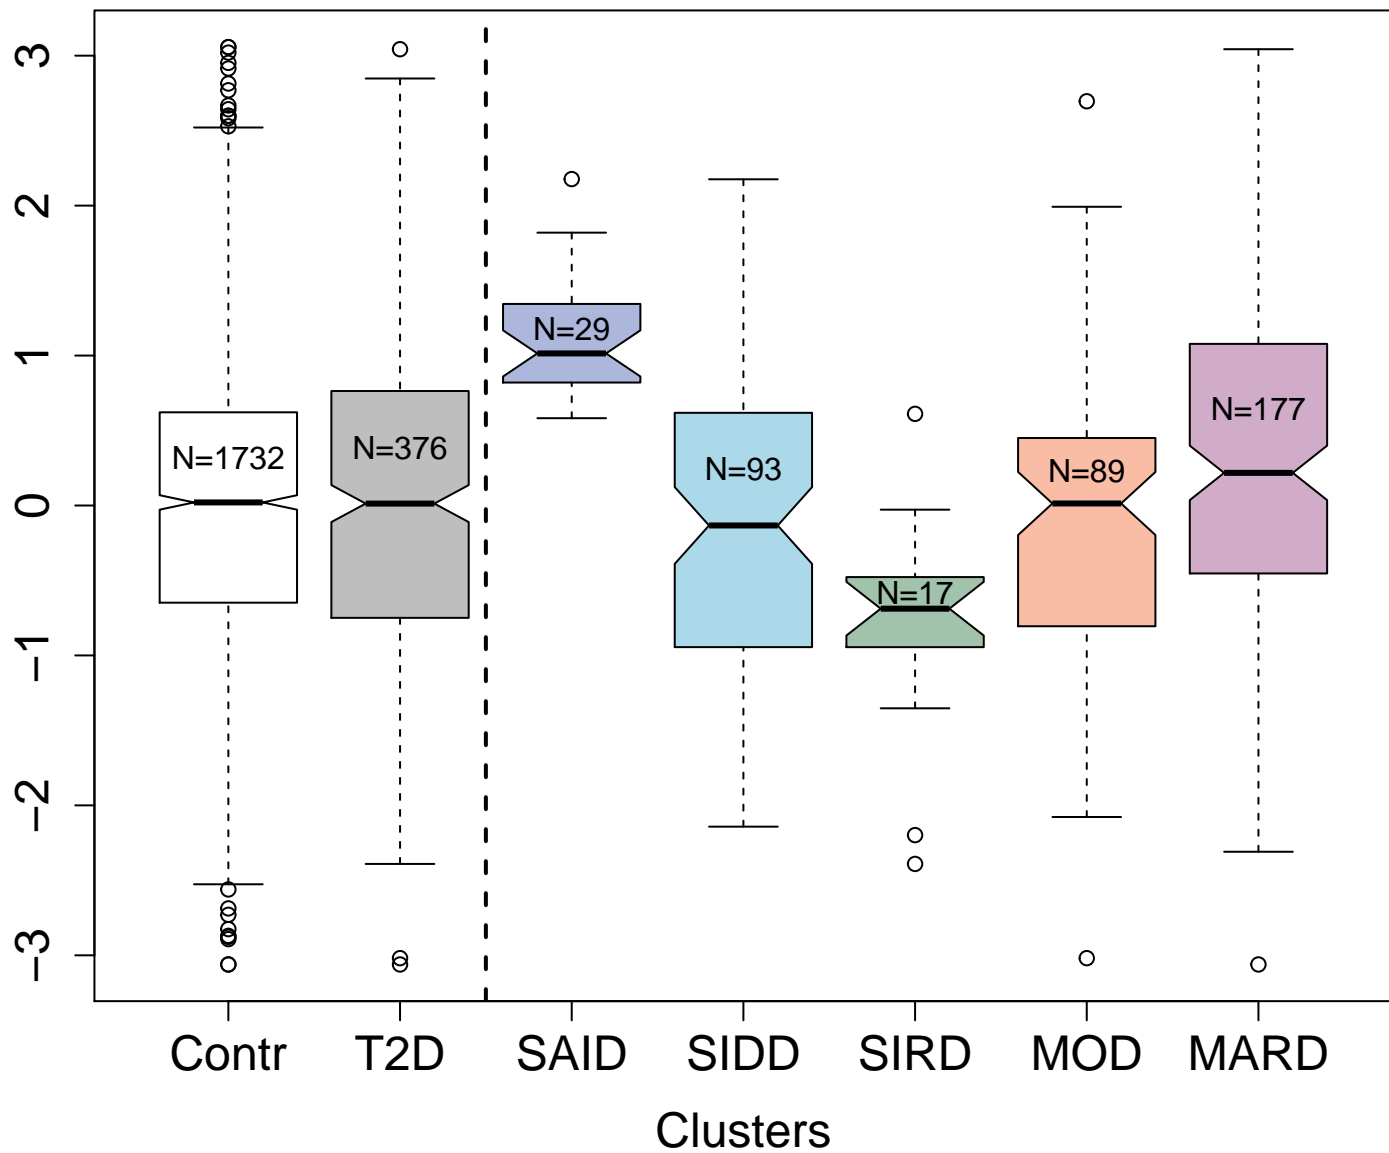

M52464 : 1-palmitoyl-2-arachidonoyl-GPE (16:0/20:4)\*

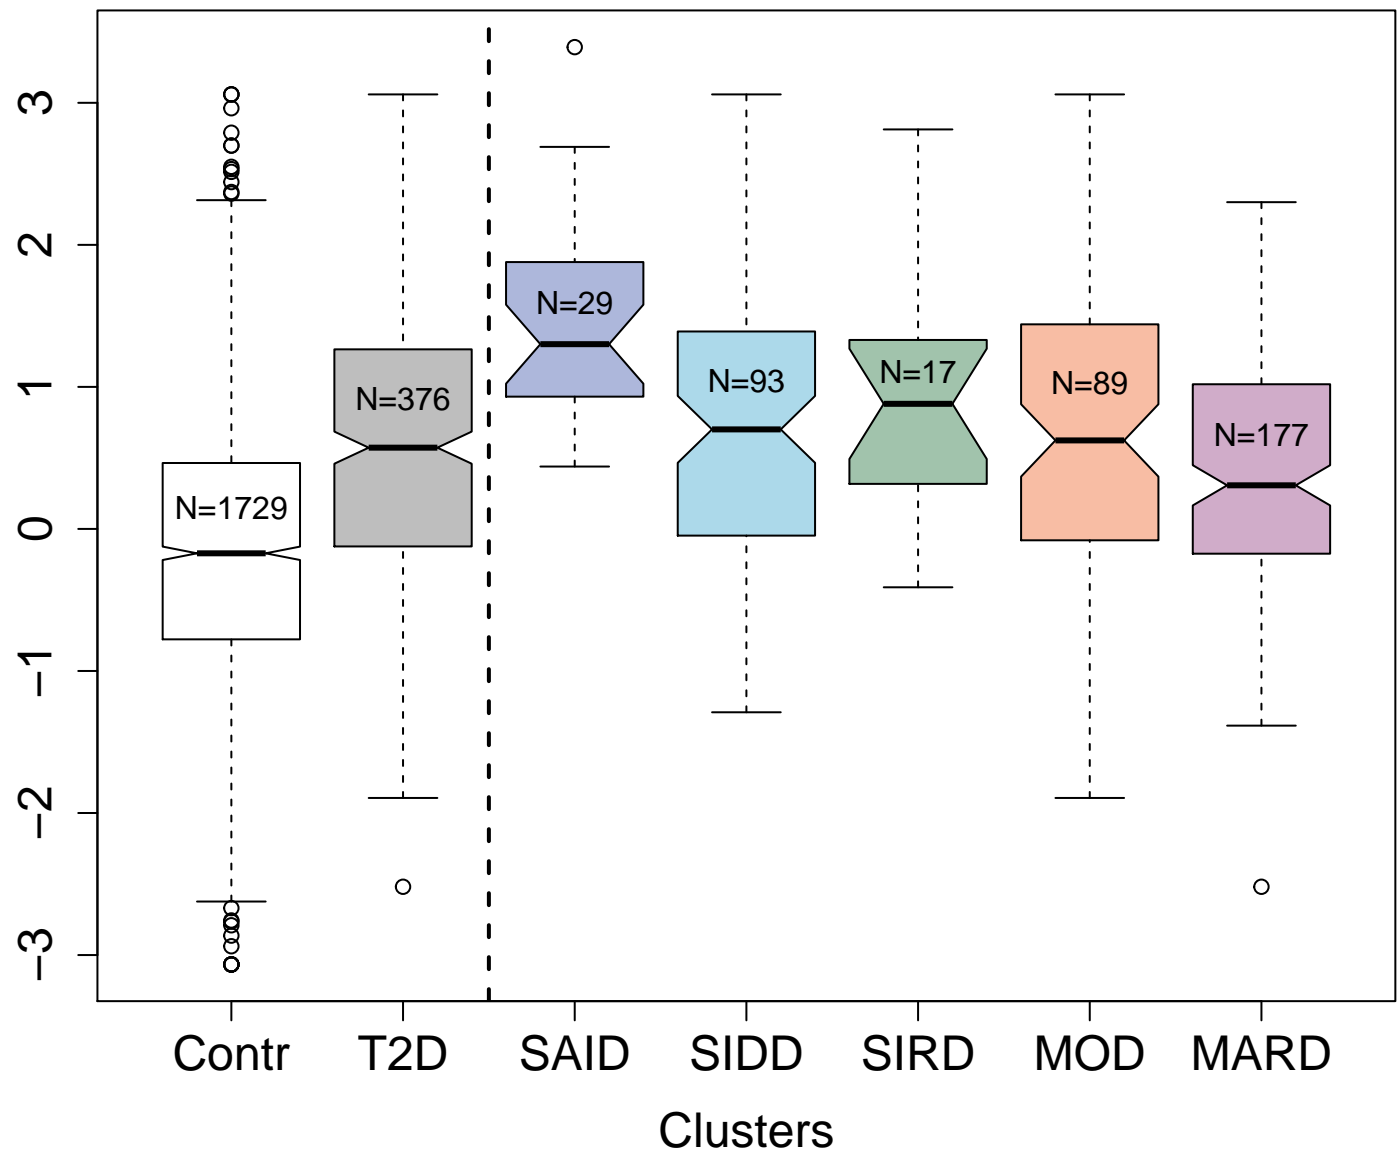

M1121 : margarate (17:0)

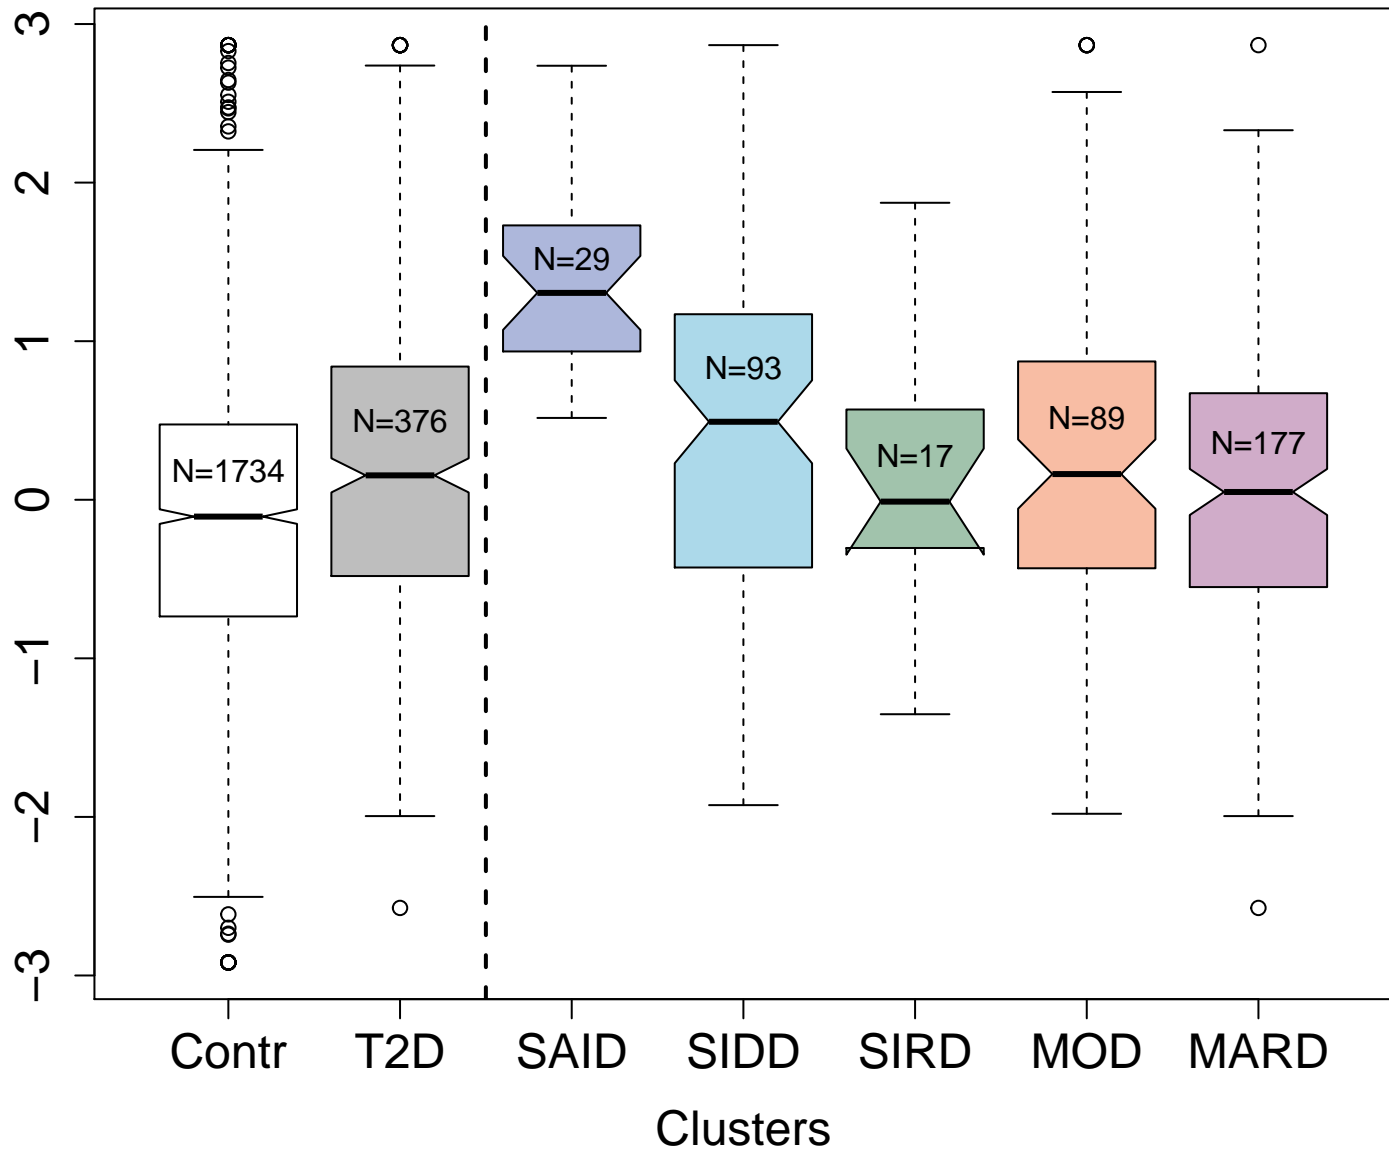

M61846 : androsterone glucuronide

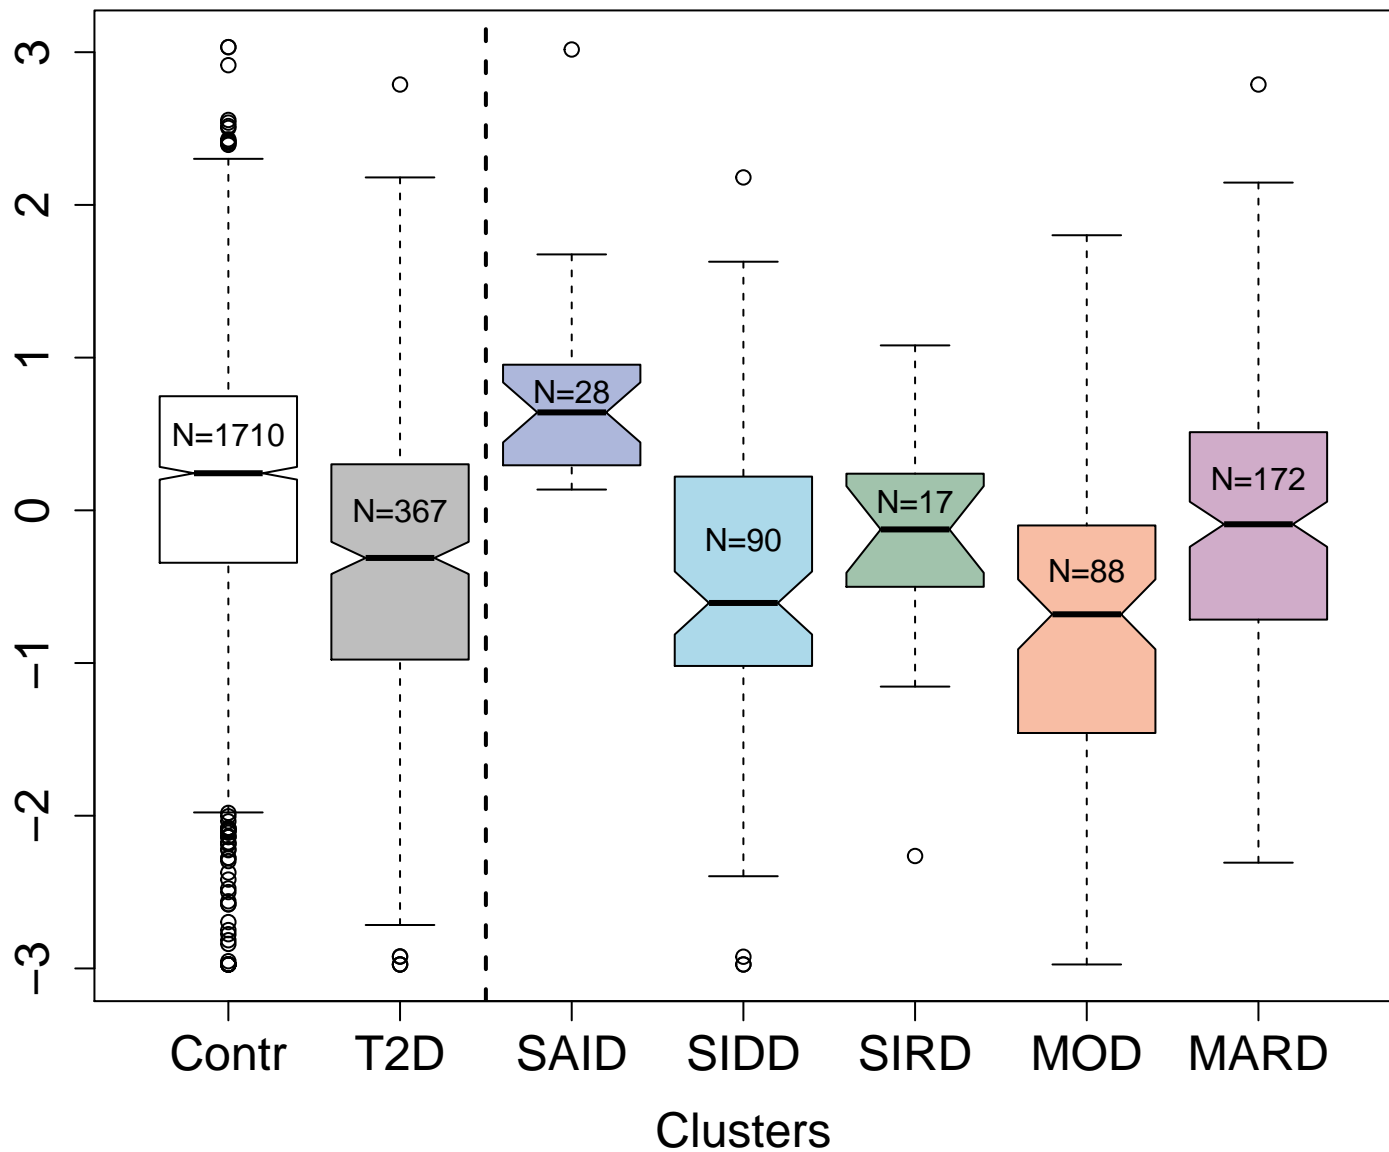

M1567 : vanillylmandelate (VMA)

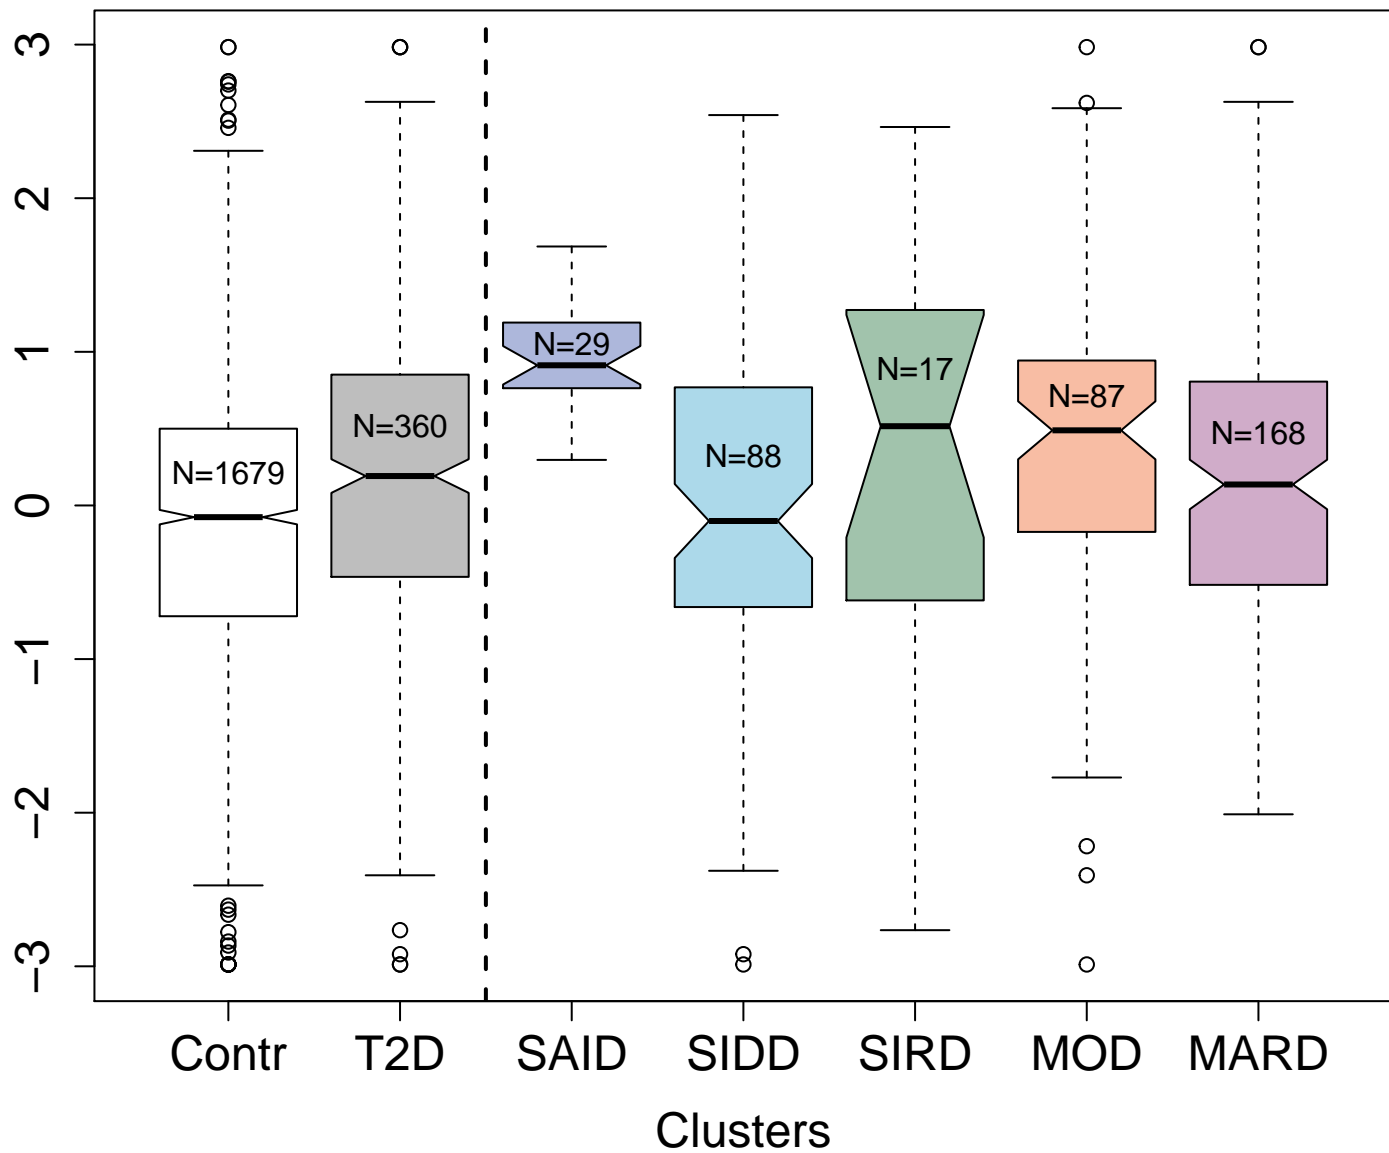

M46461 : X - 16124

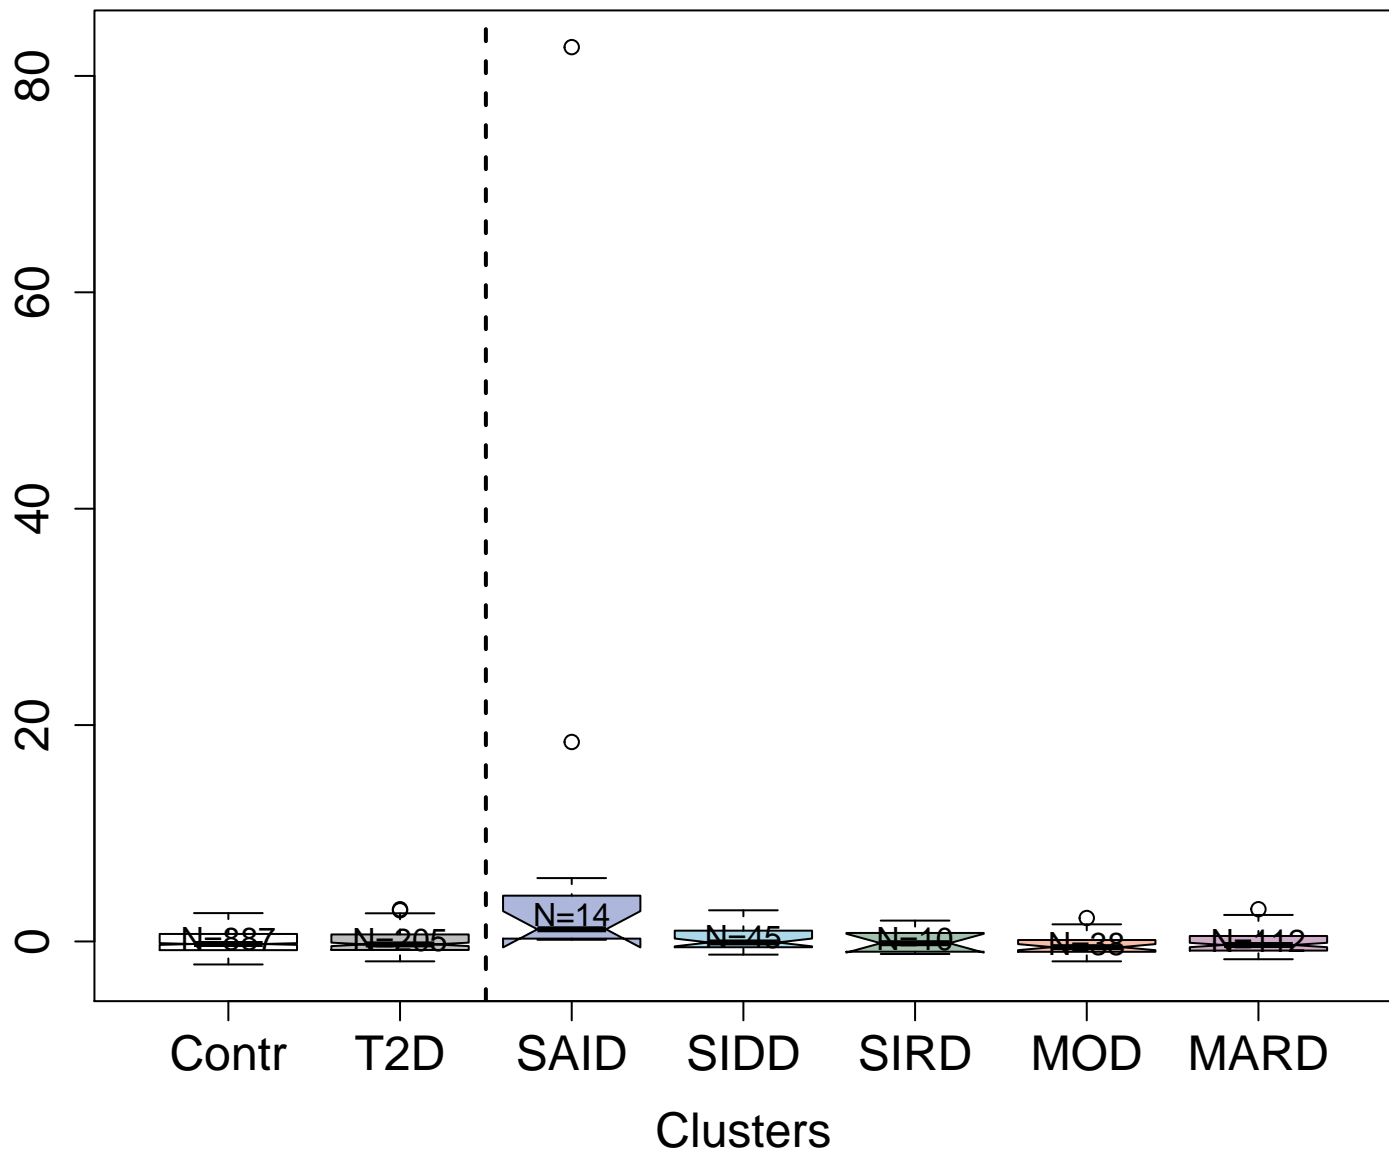



M46997 : X - 12822

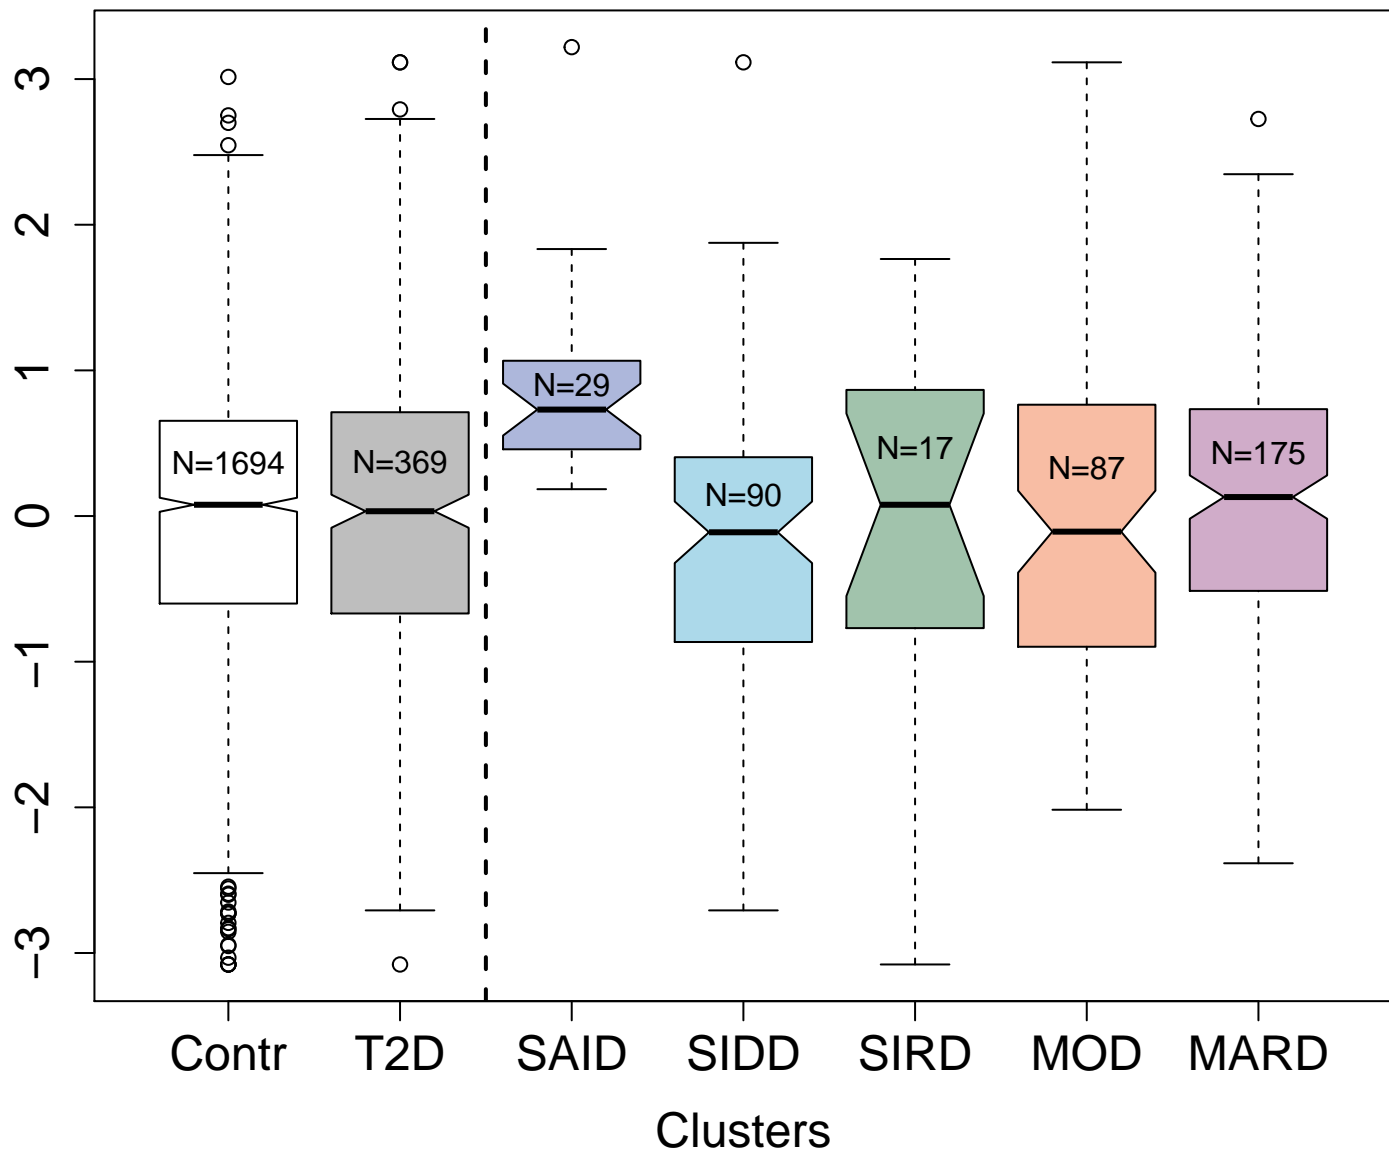

M15685 : 5-hydroxylysine

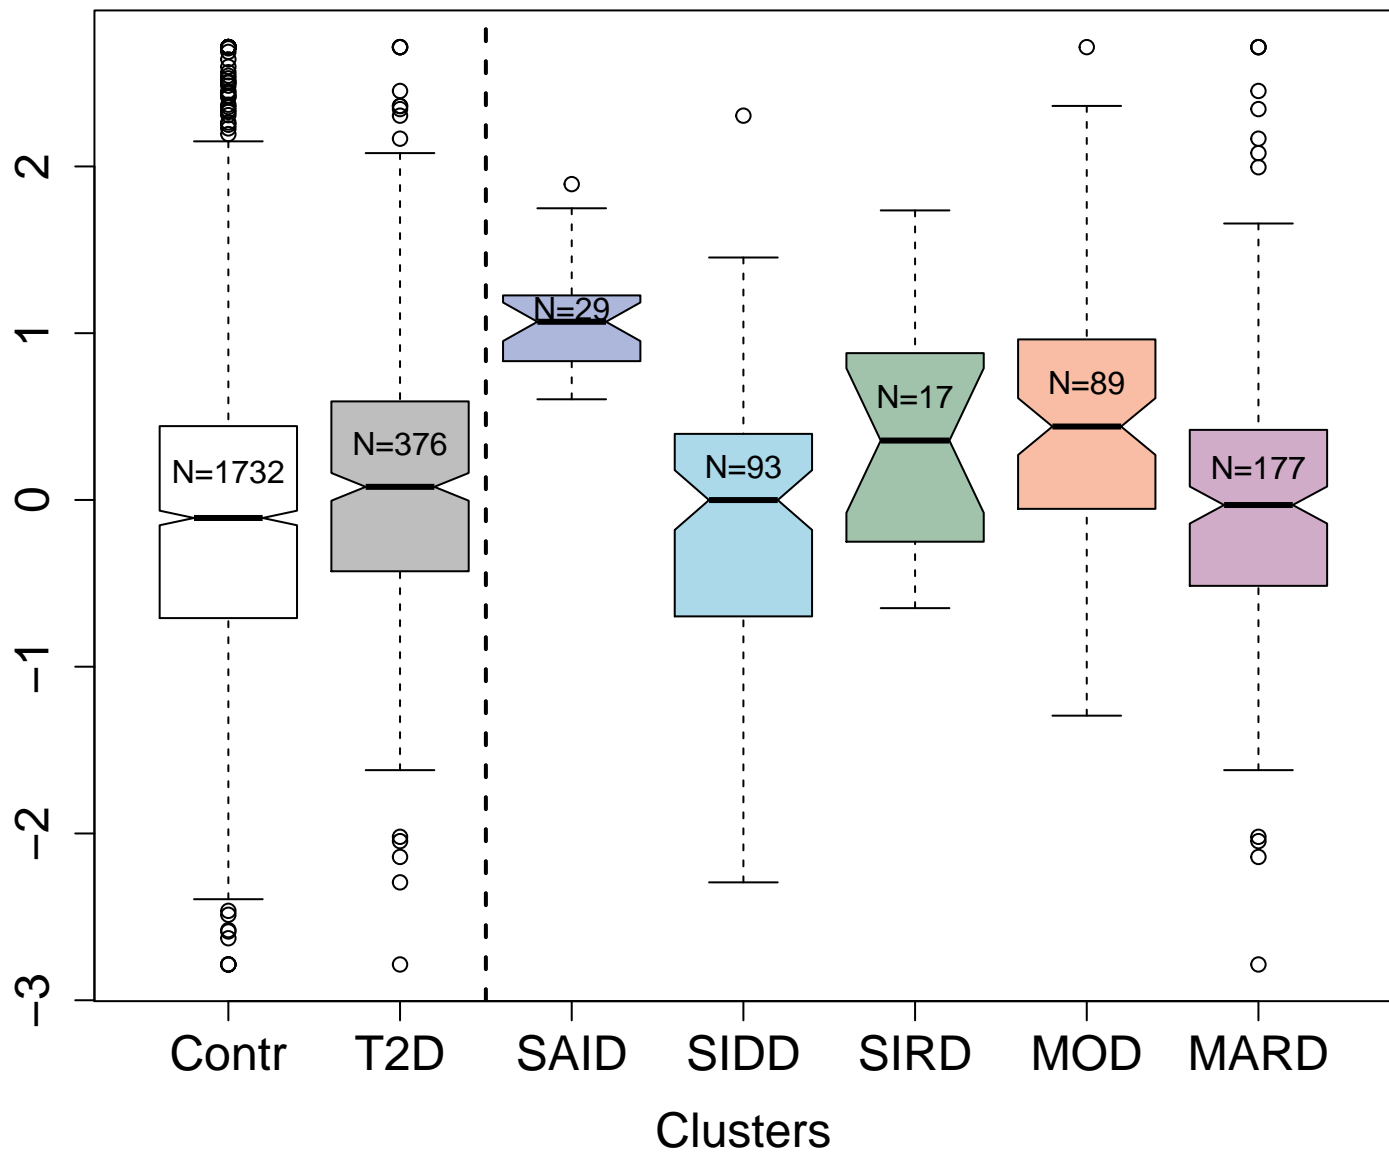

M55072 : 2-oxoarginine\*

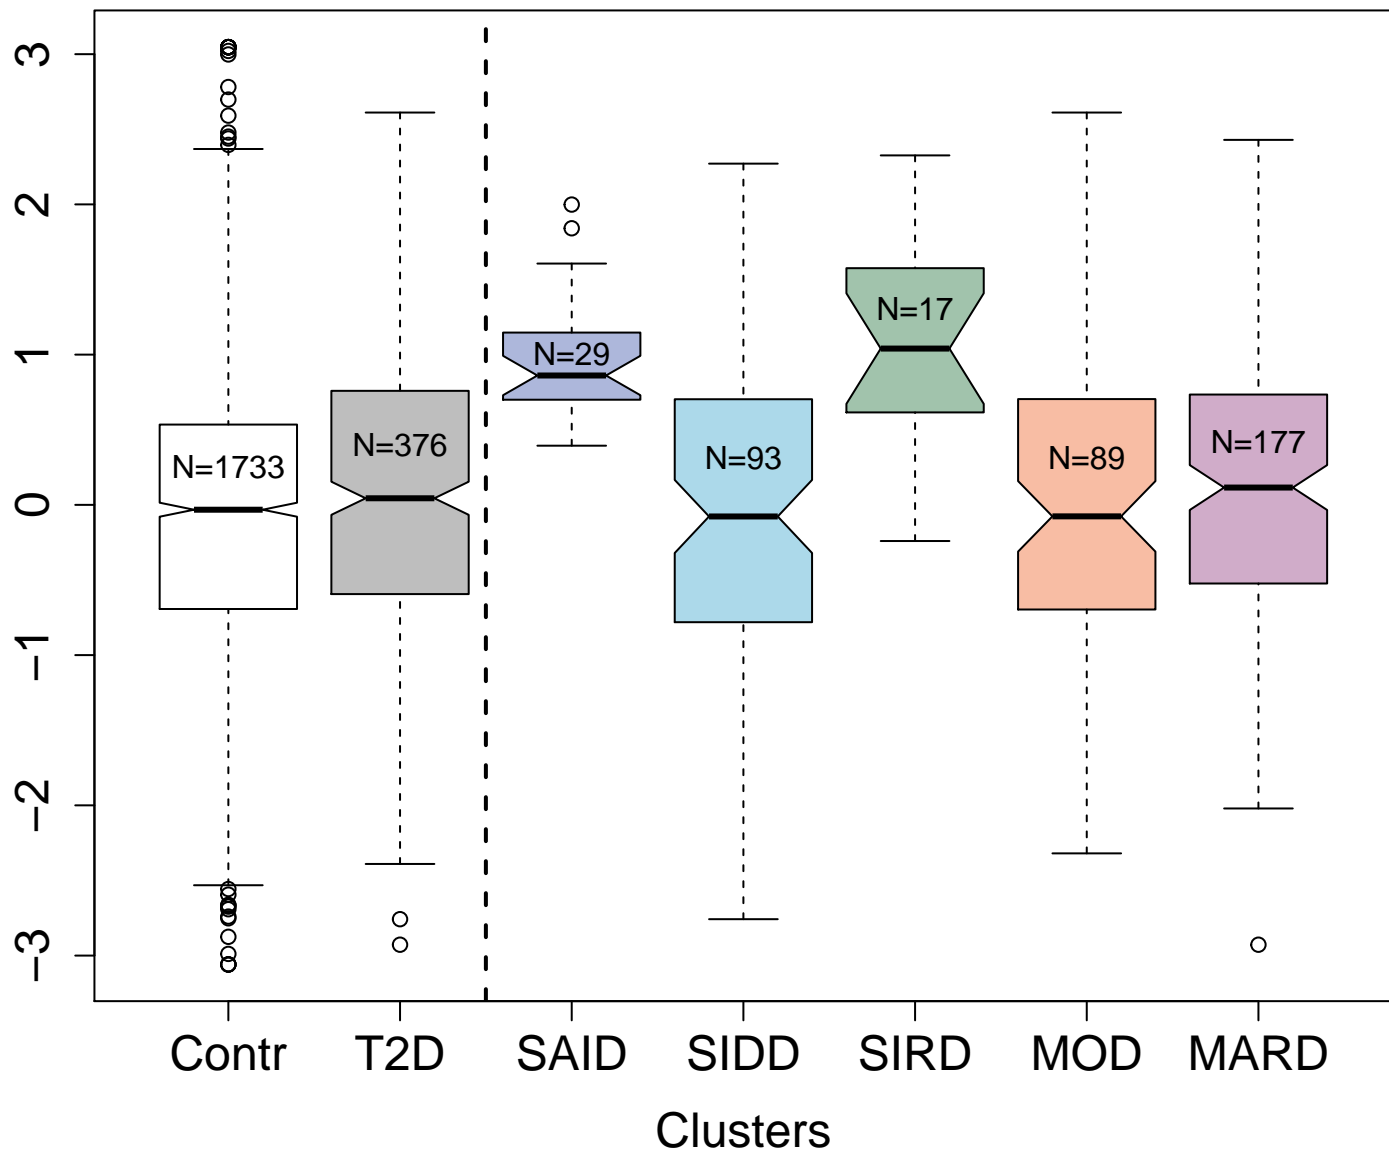

M36095 : thymol sulfate

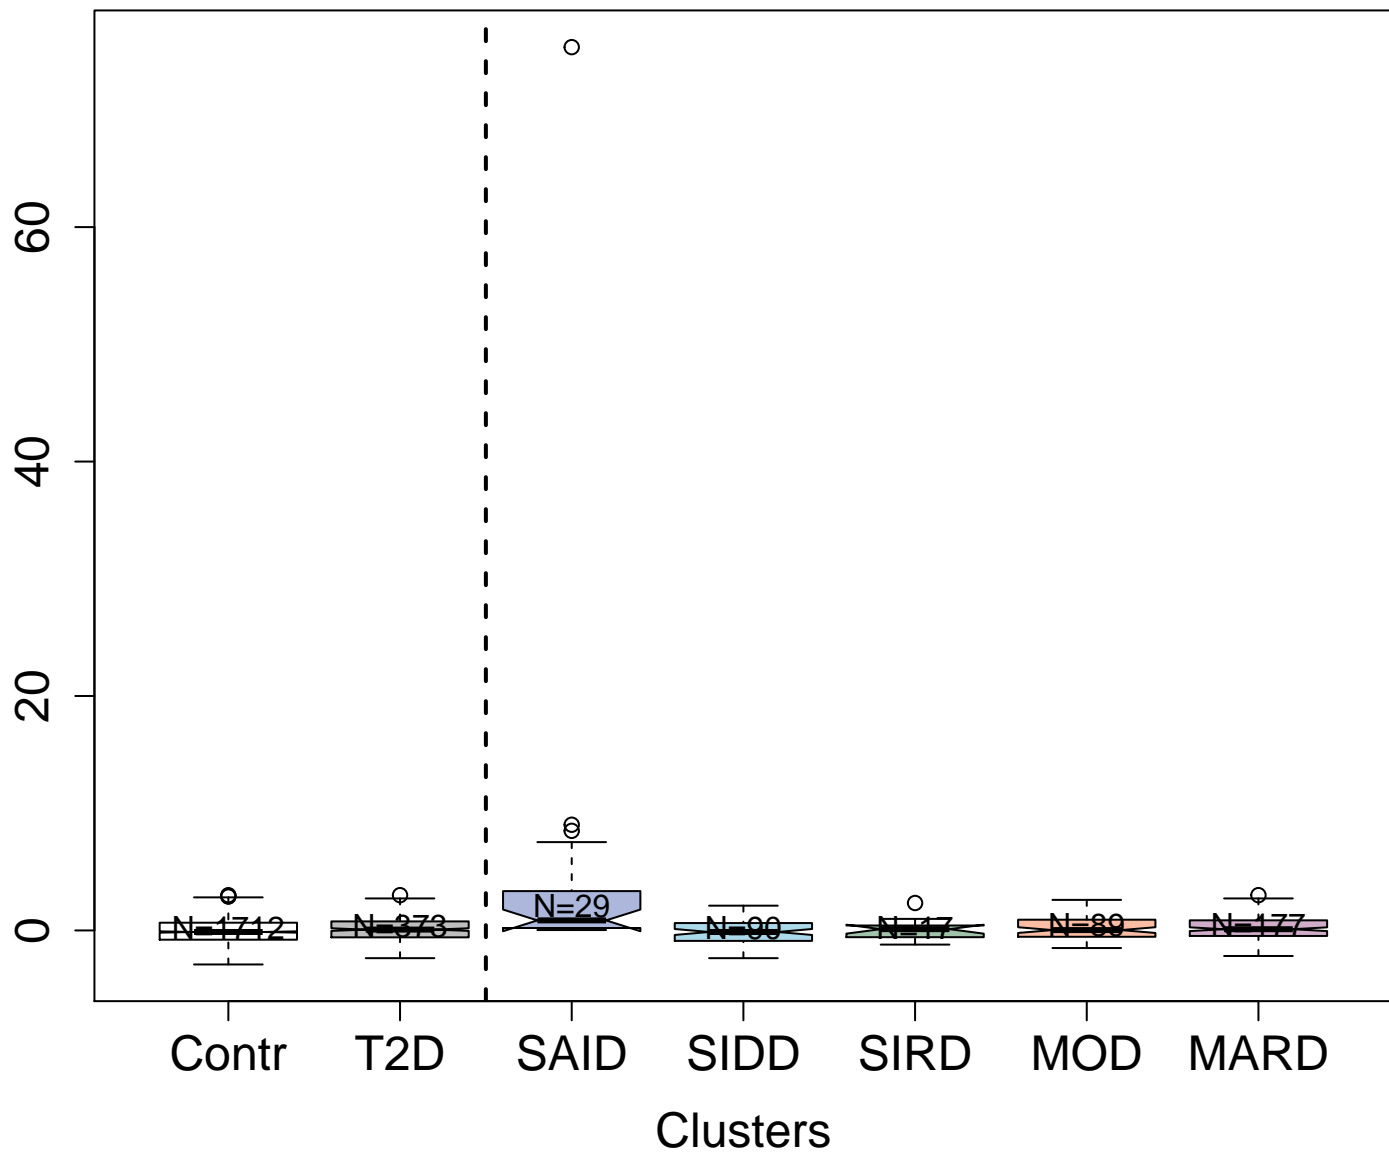

M20694 : oxalate (ethanedioate)

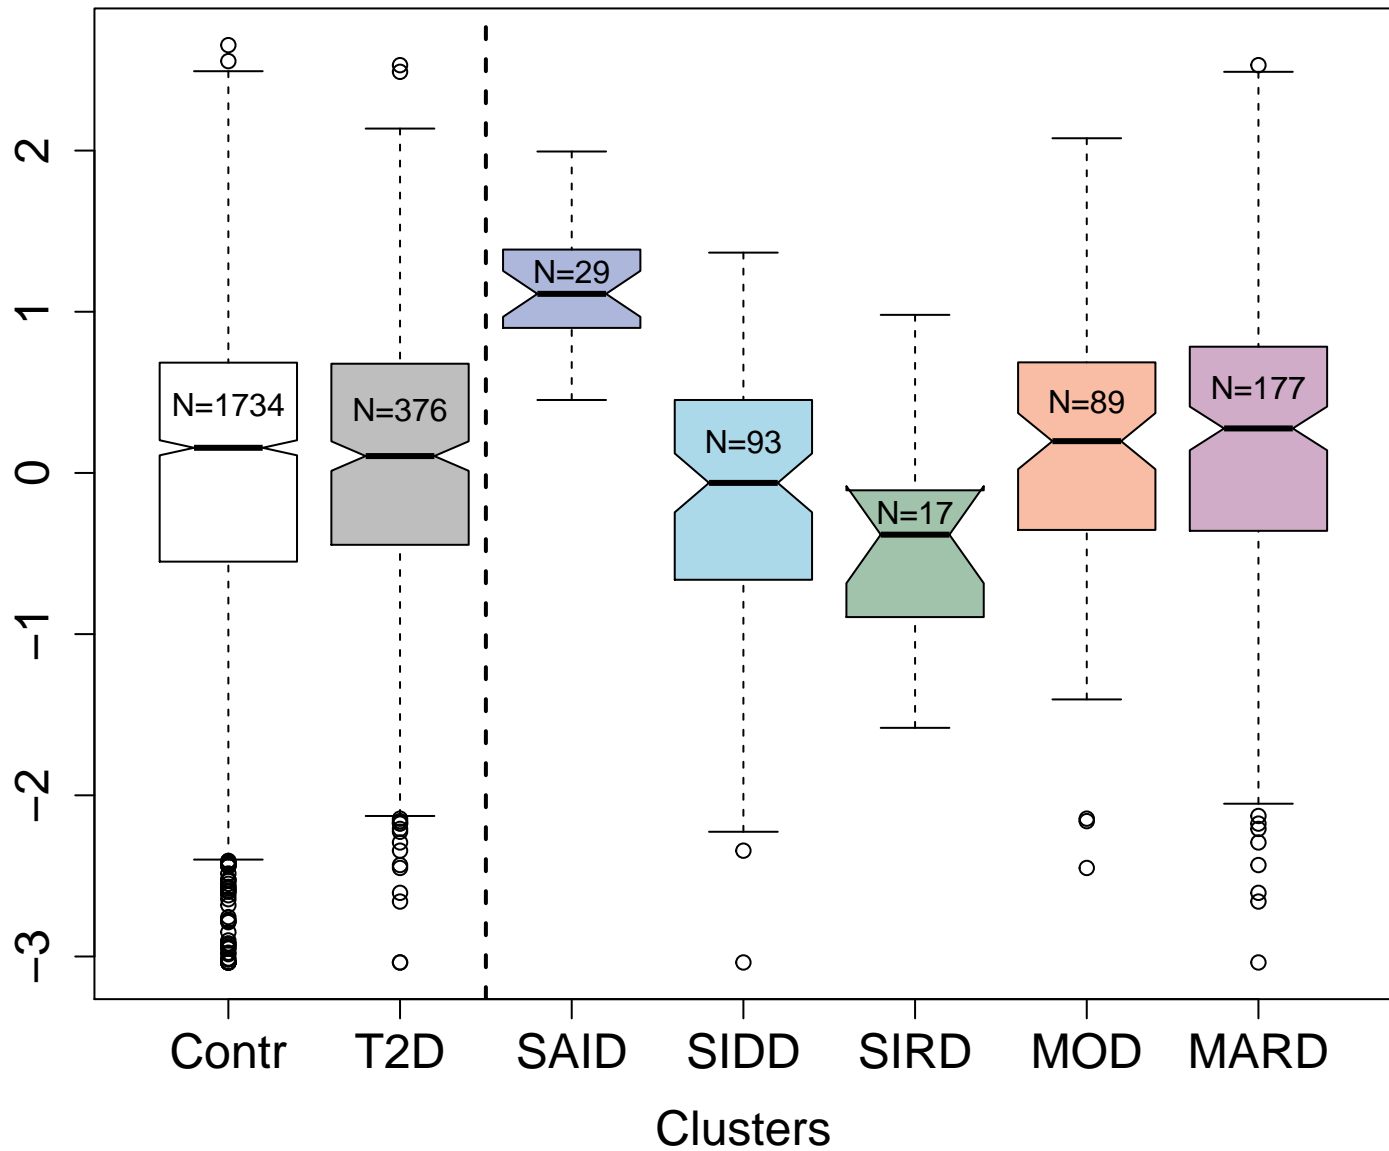

M63685 : decadienedioic acid (C10:2-DC)\*\*

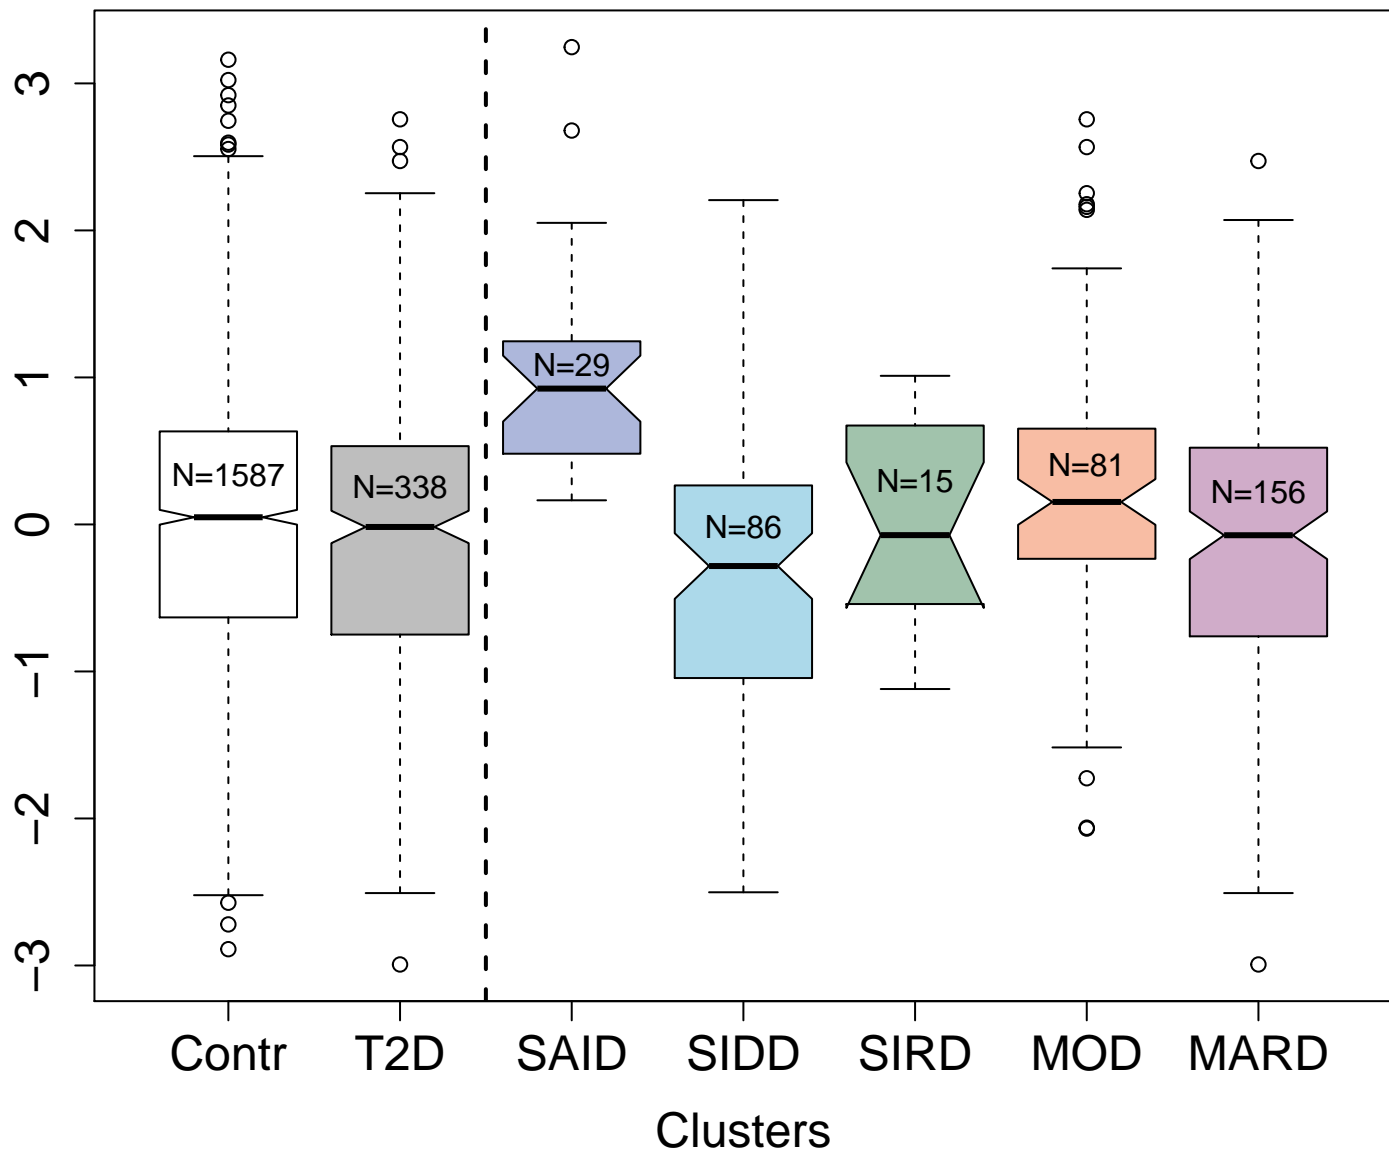

M33953 : N-acetylgarginine

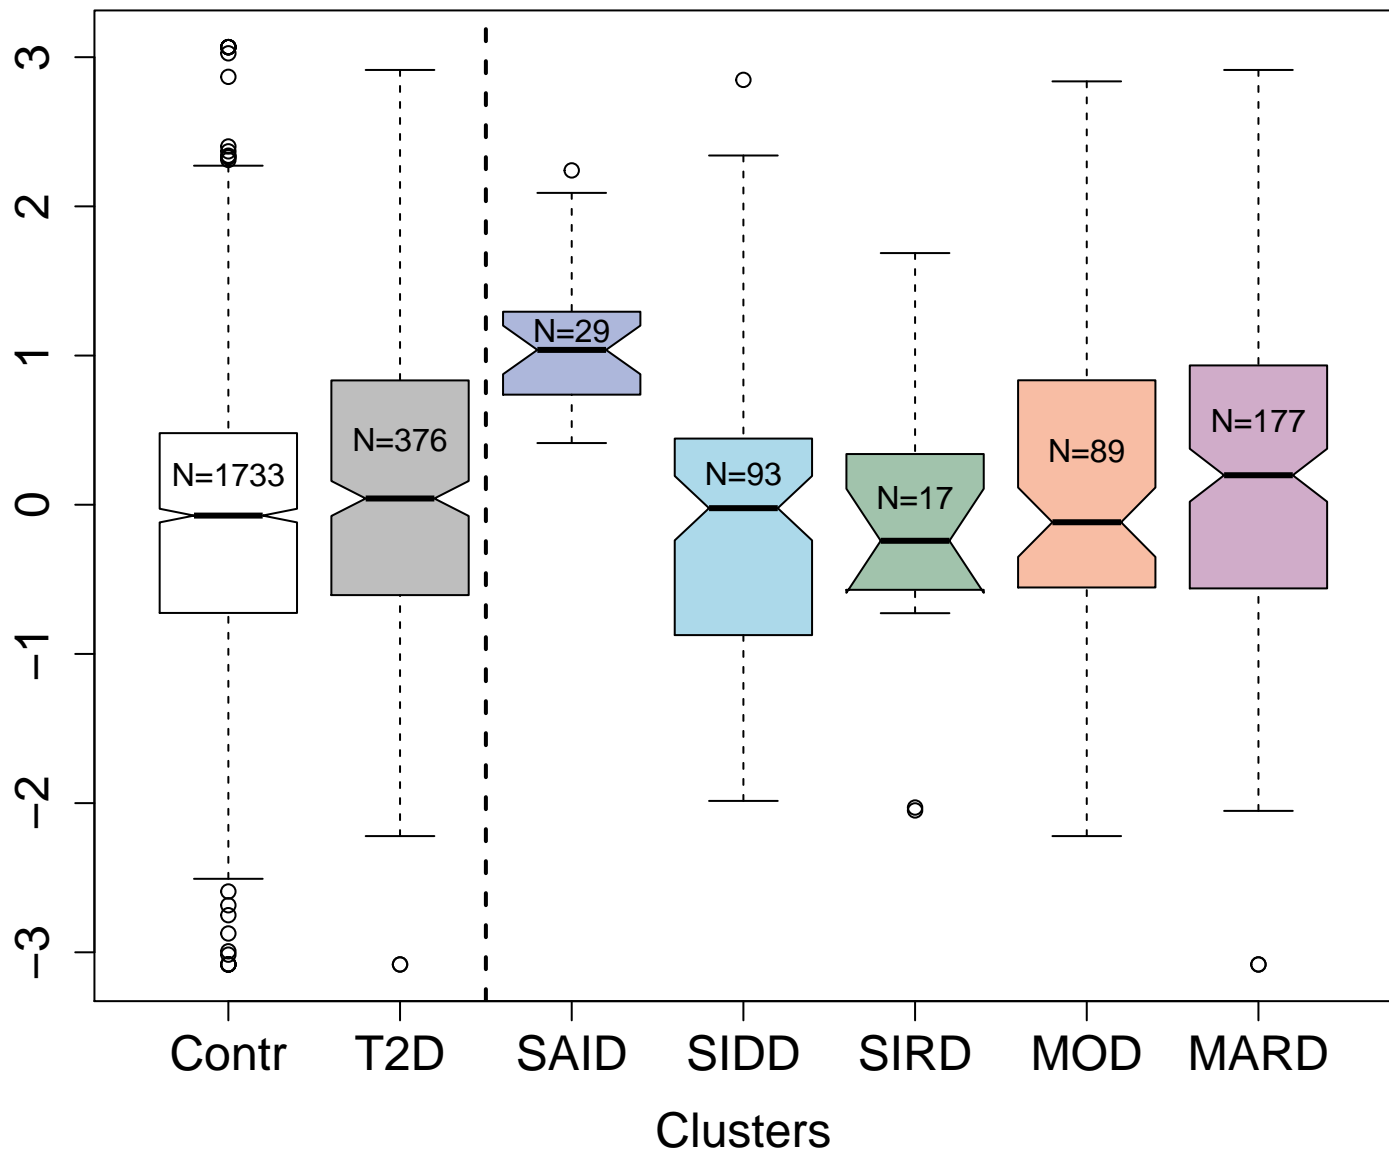

M52478 : 1-(1-enyl-palmitoyl)-2-oleoyl-GPC (P-16:0/18:1)

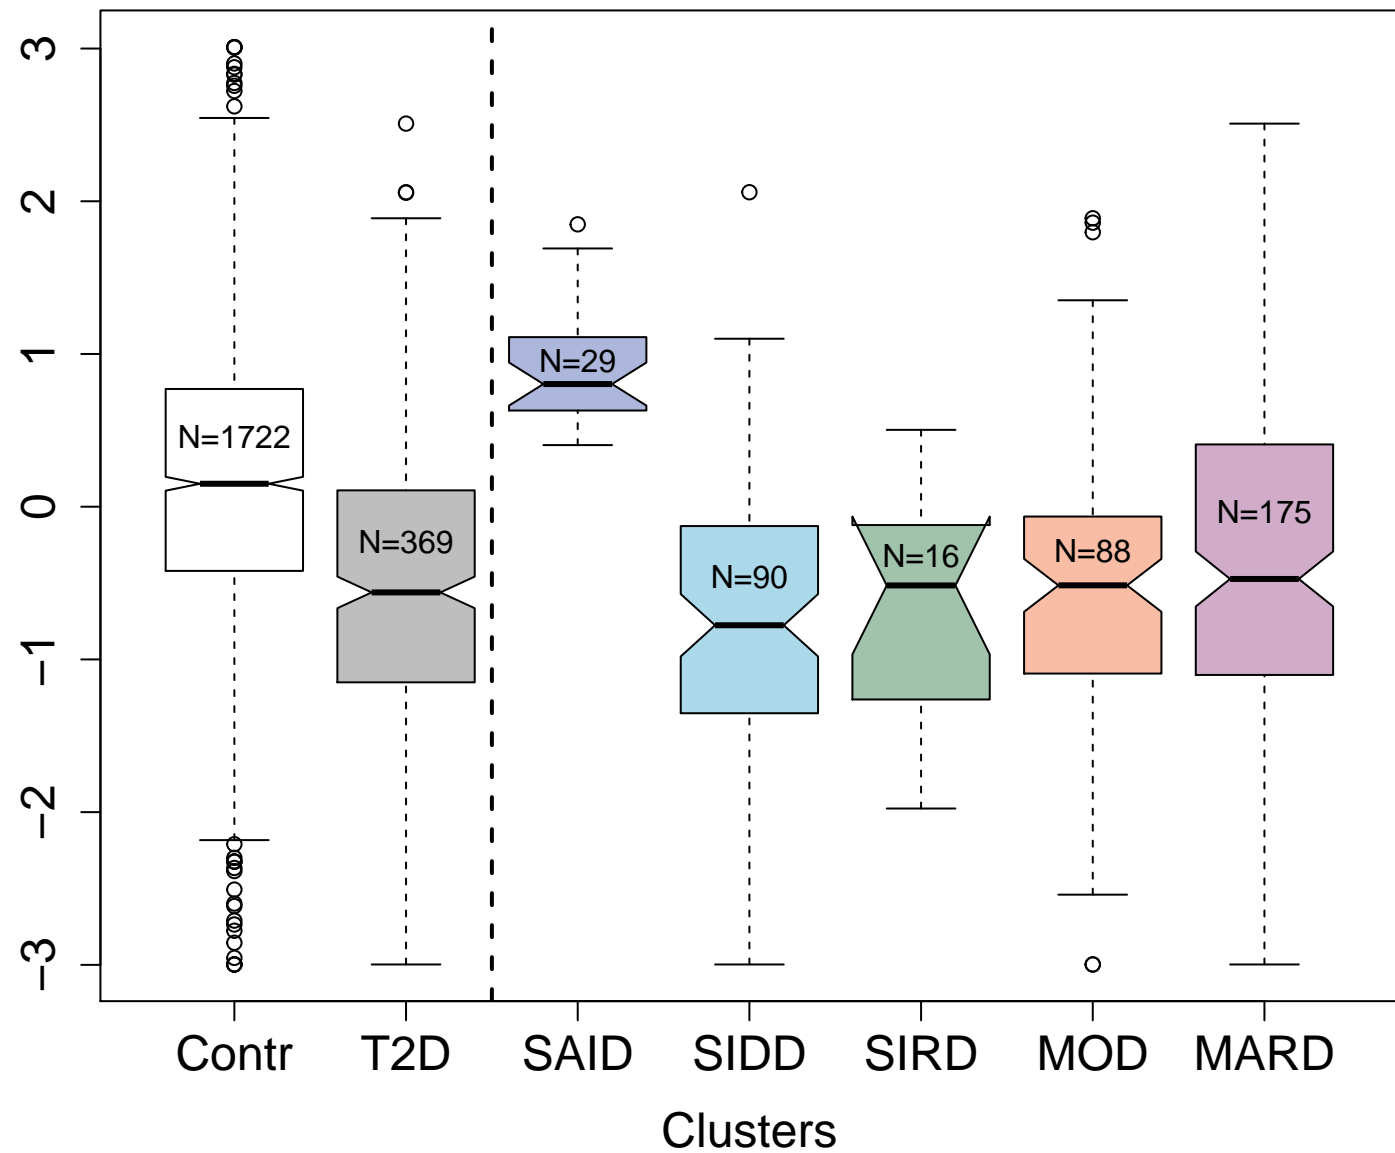



M35160 : oleoylcarnitine (C18:1)

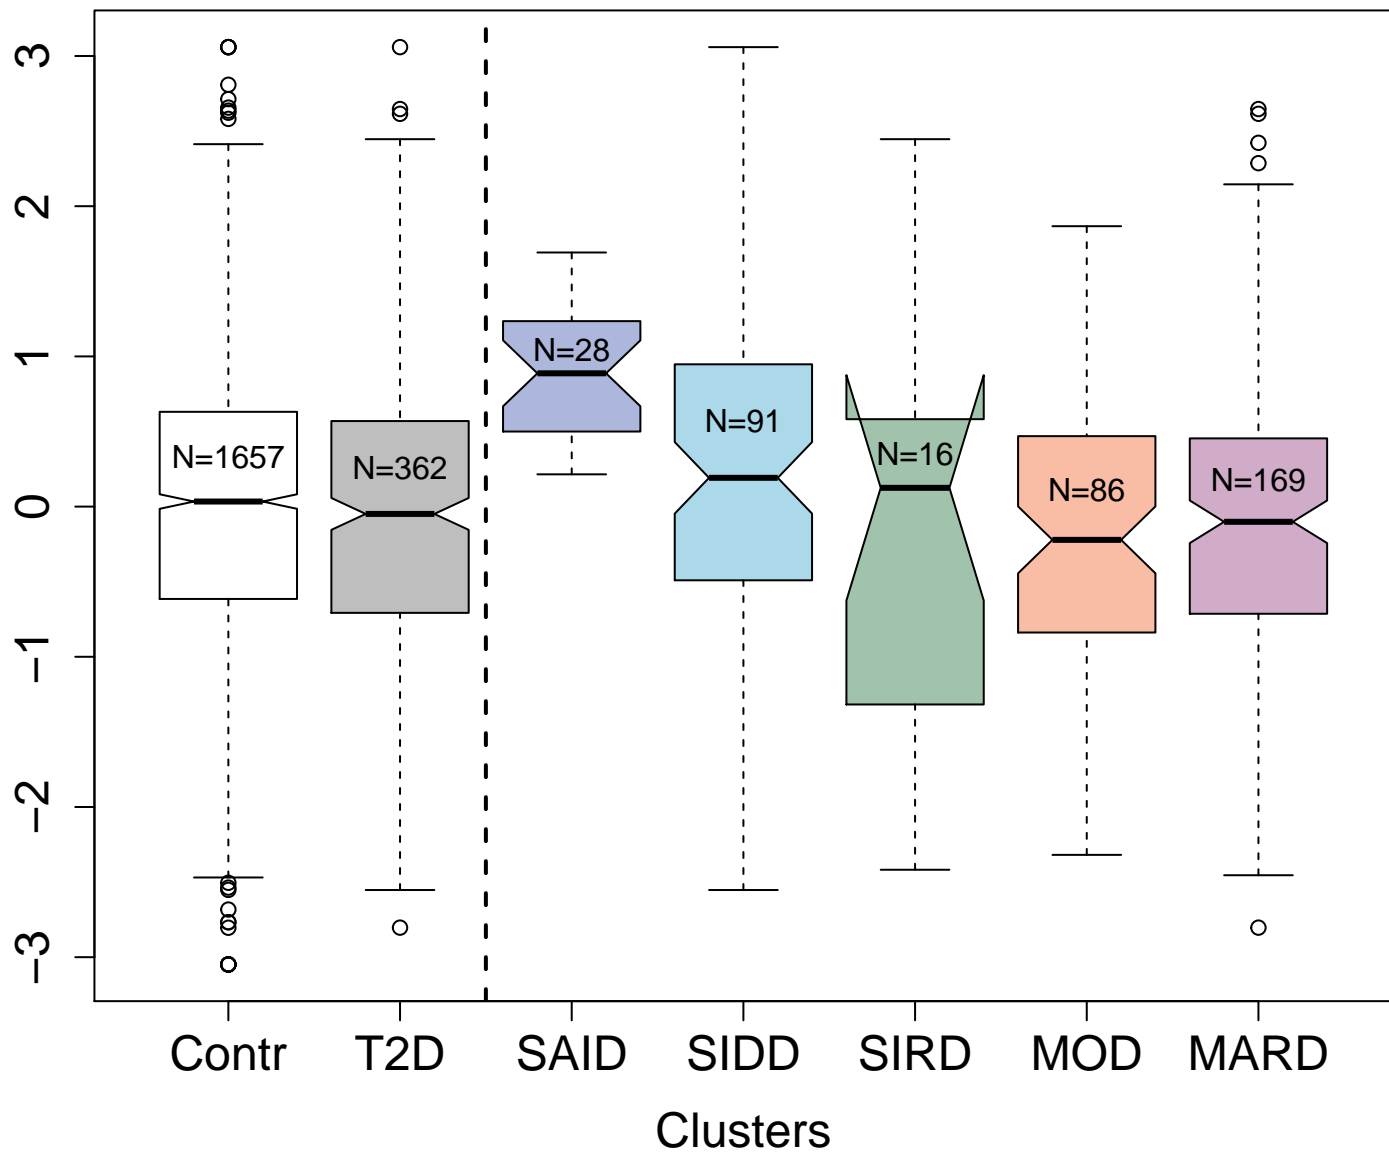

M49542 : X - 23665

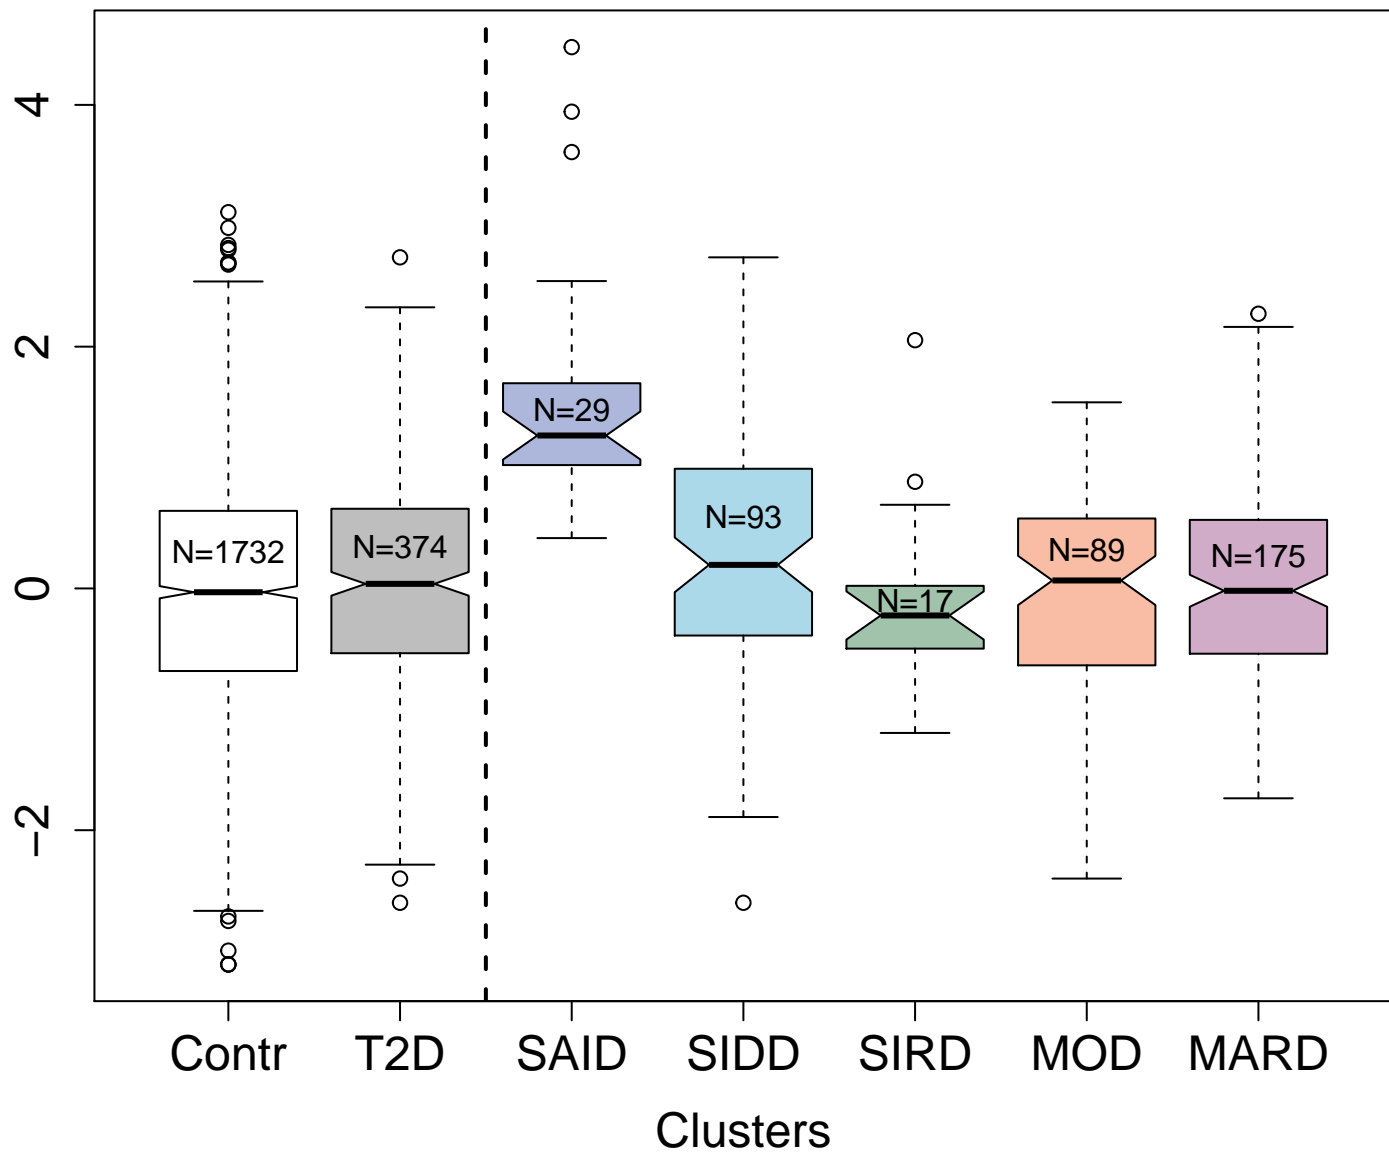

M32390 : N-acetytyrosine

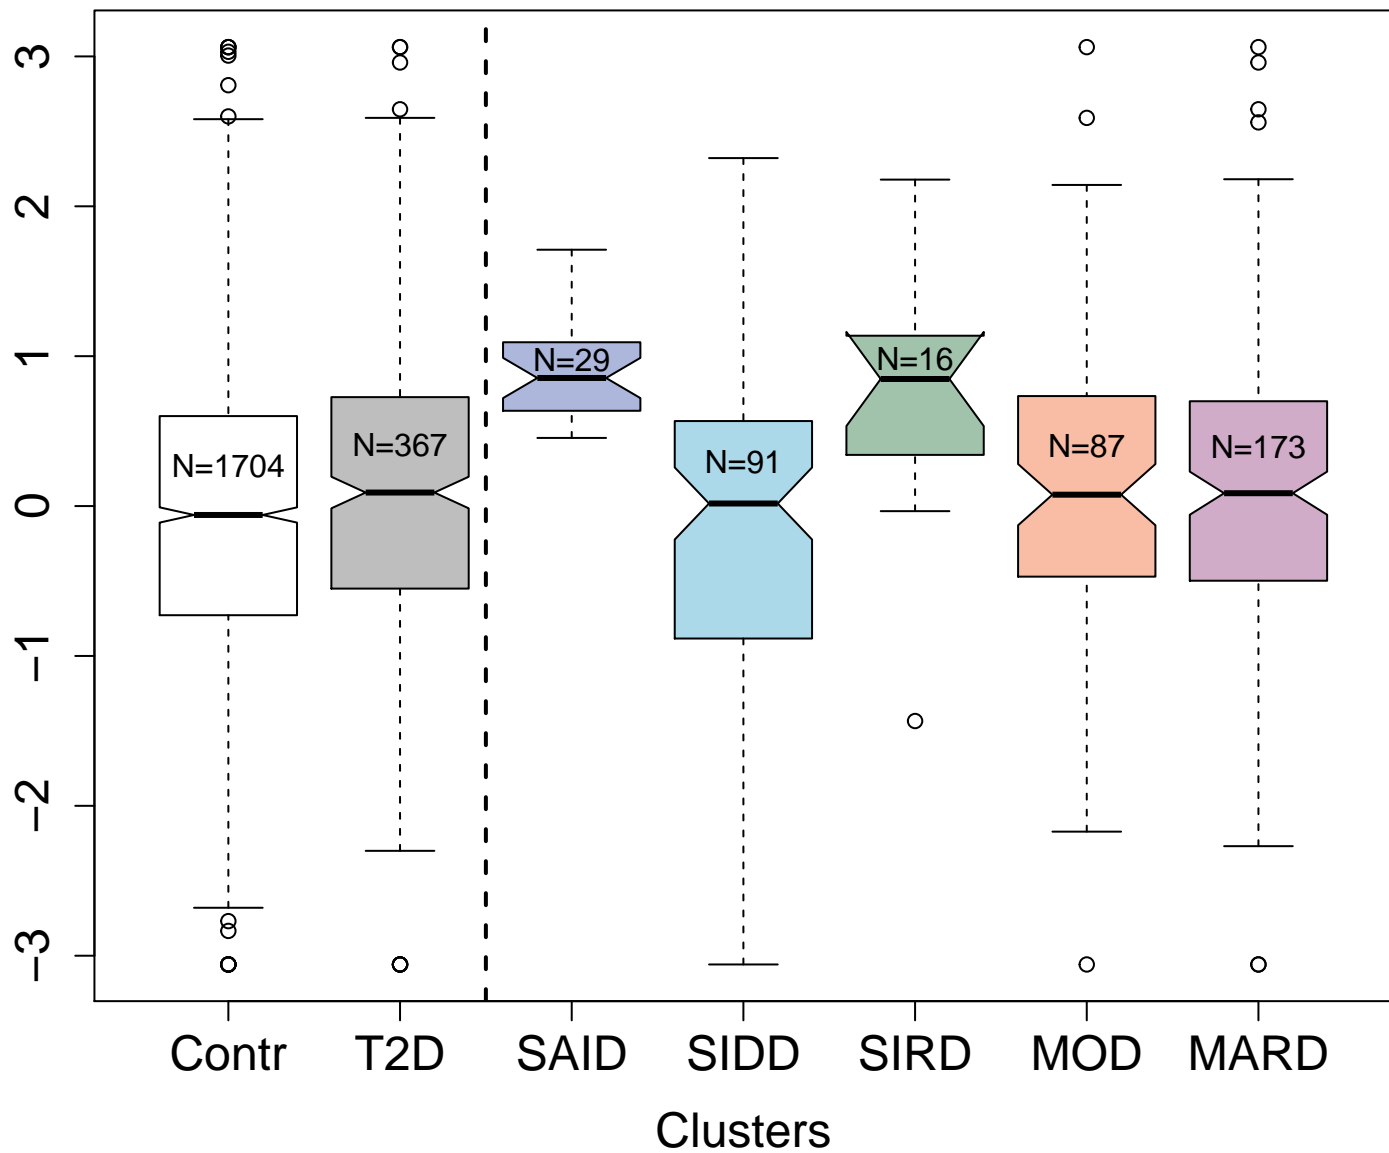

M62851 : hydroxypalmitoyl sphingomyelin (d18:1/16:0(OH))\*\*

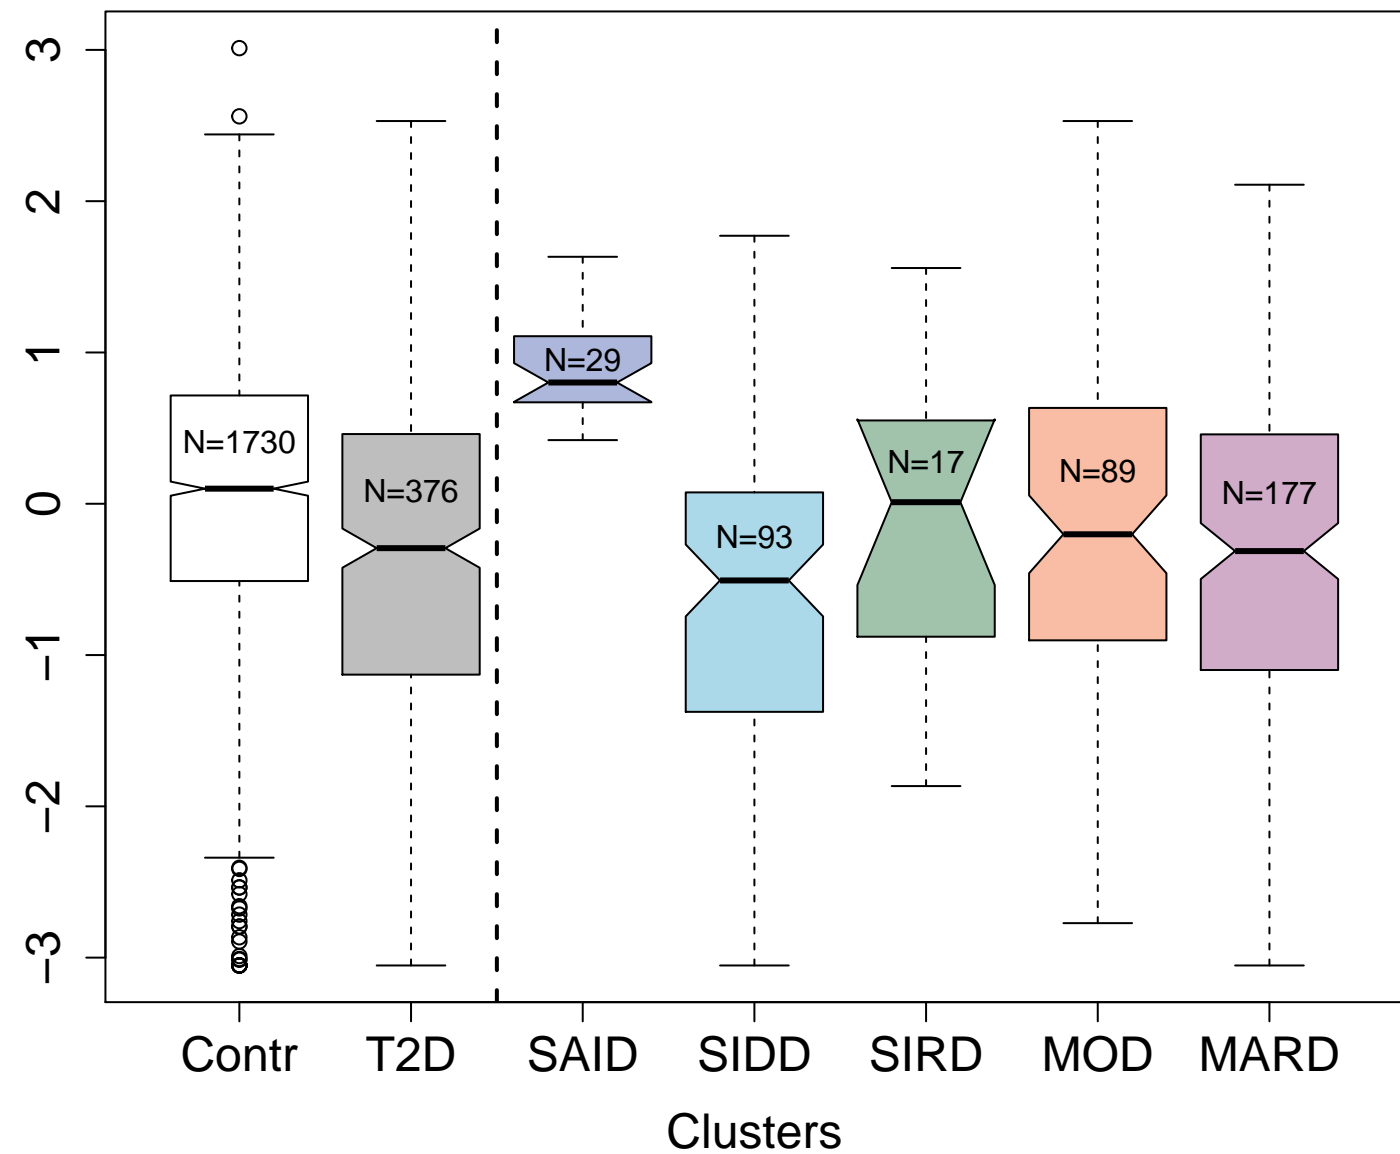

M22001 : 3-hydroxyoctanoate

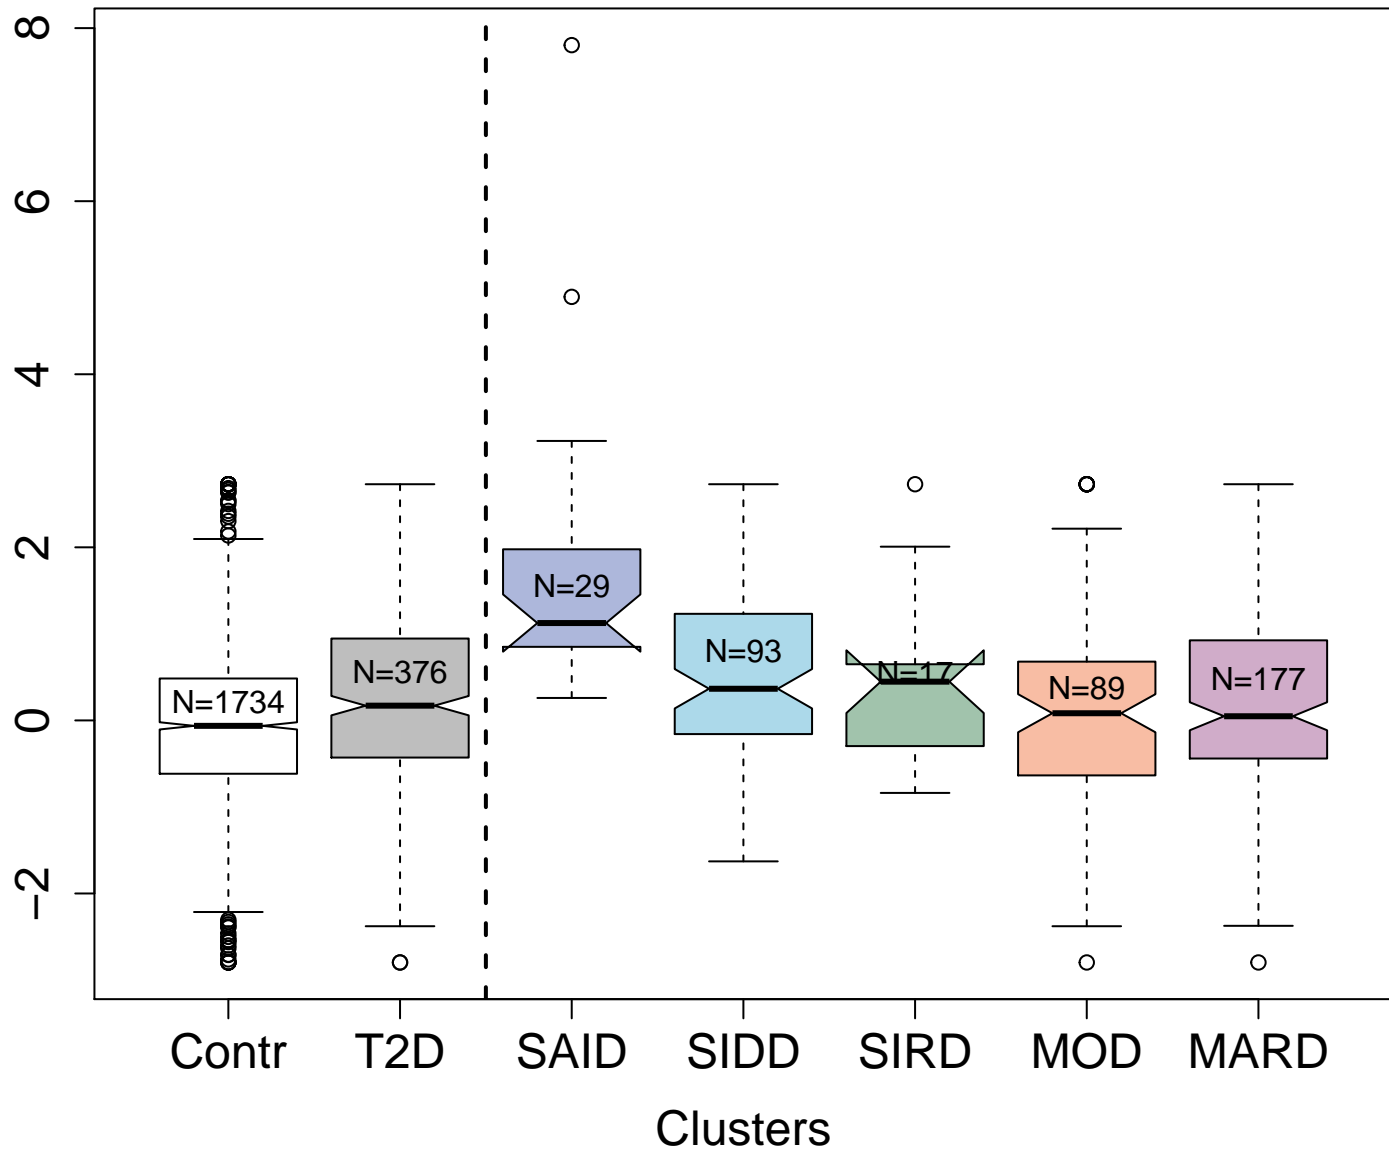

M27710 : N-acetylglycine

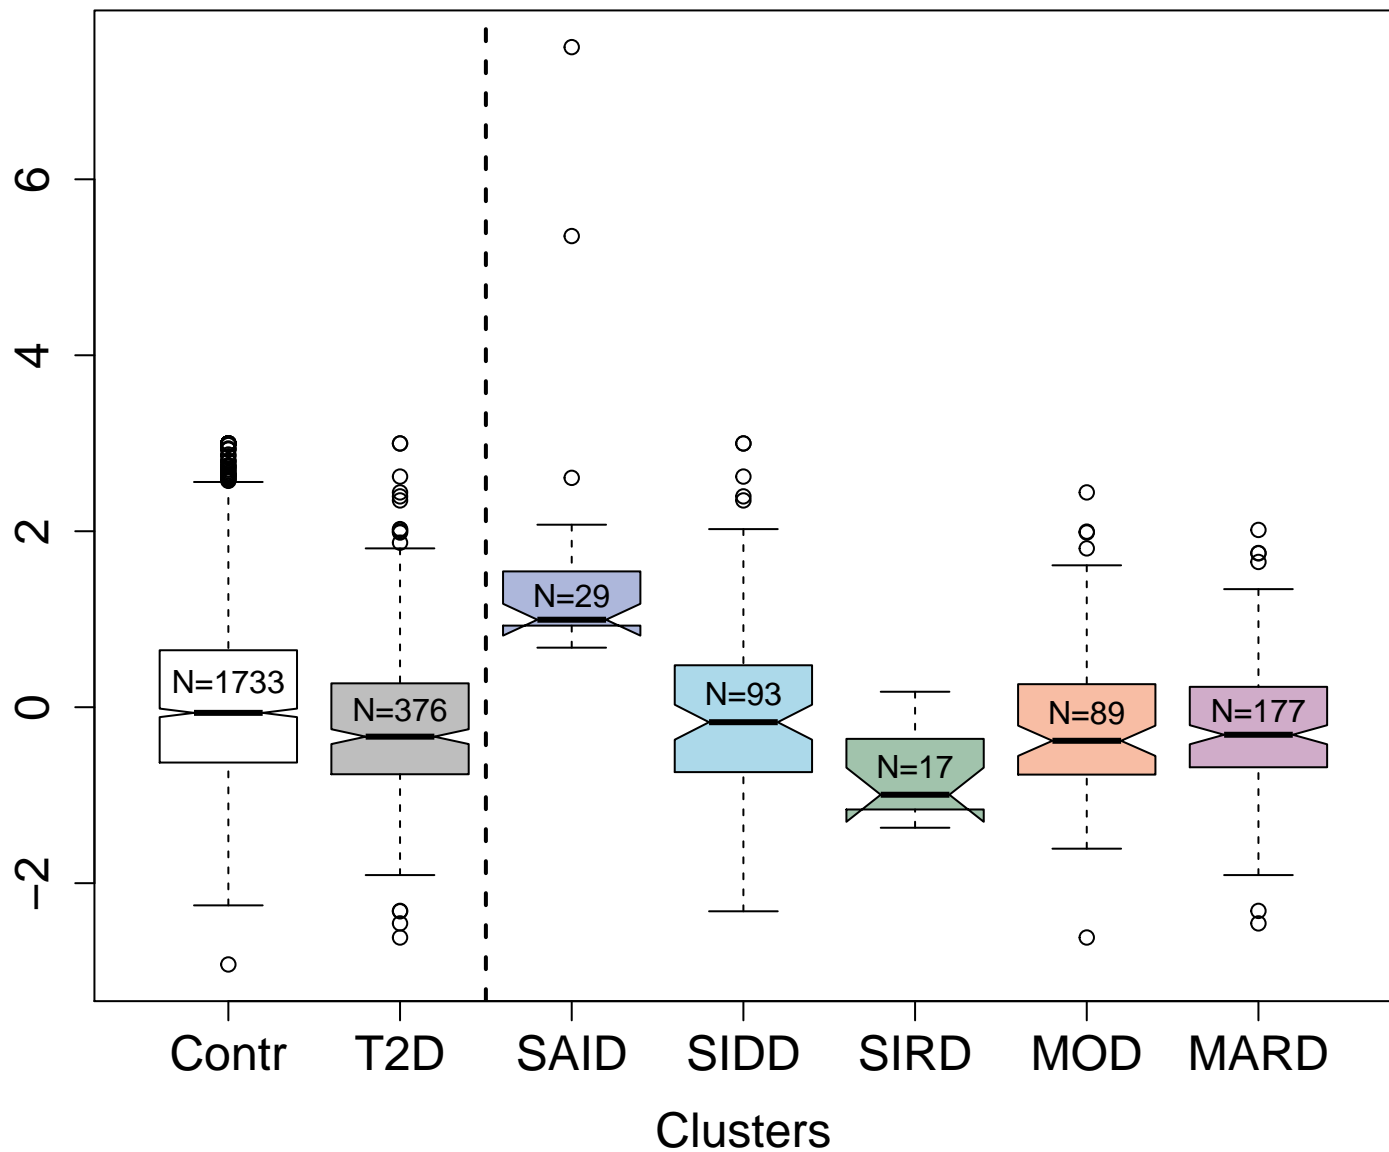

M32827 : andro steroid monosulfate C19H28O6S (1)\*

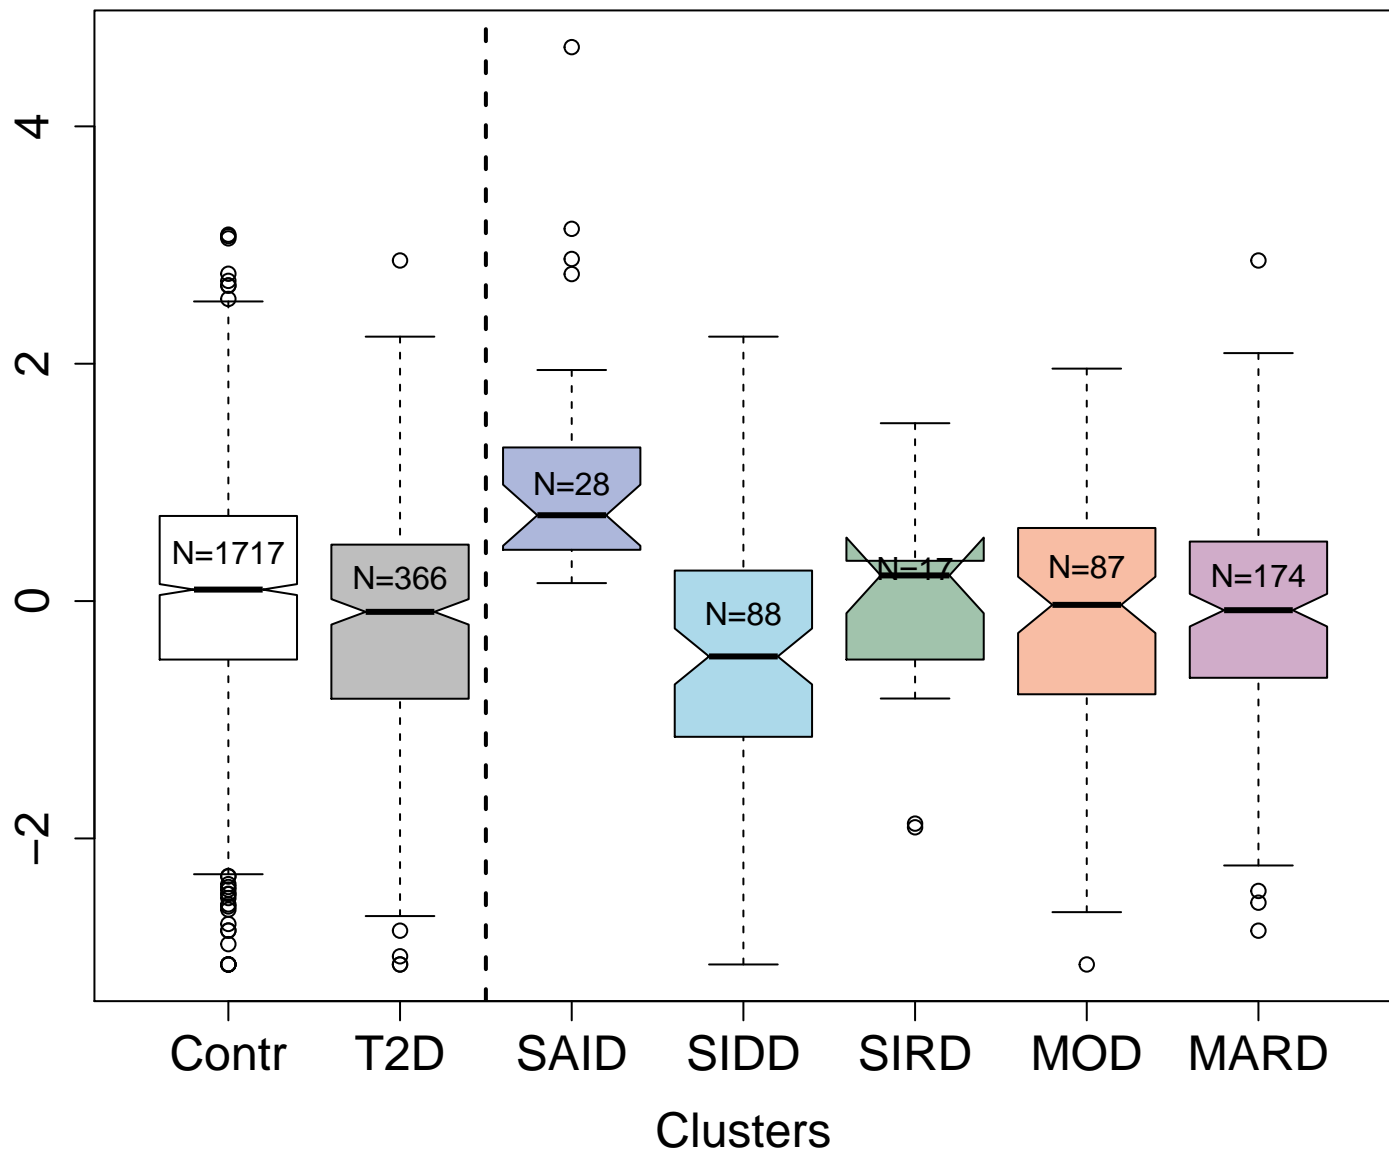

M15140 : kynurenine

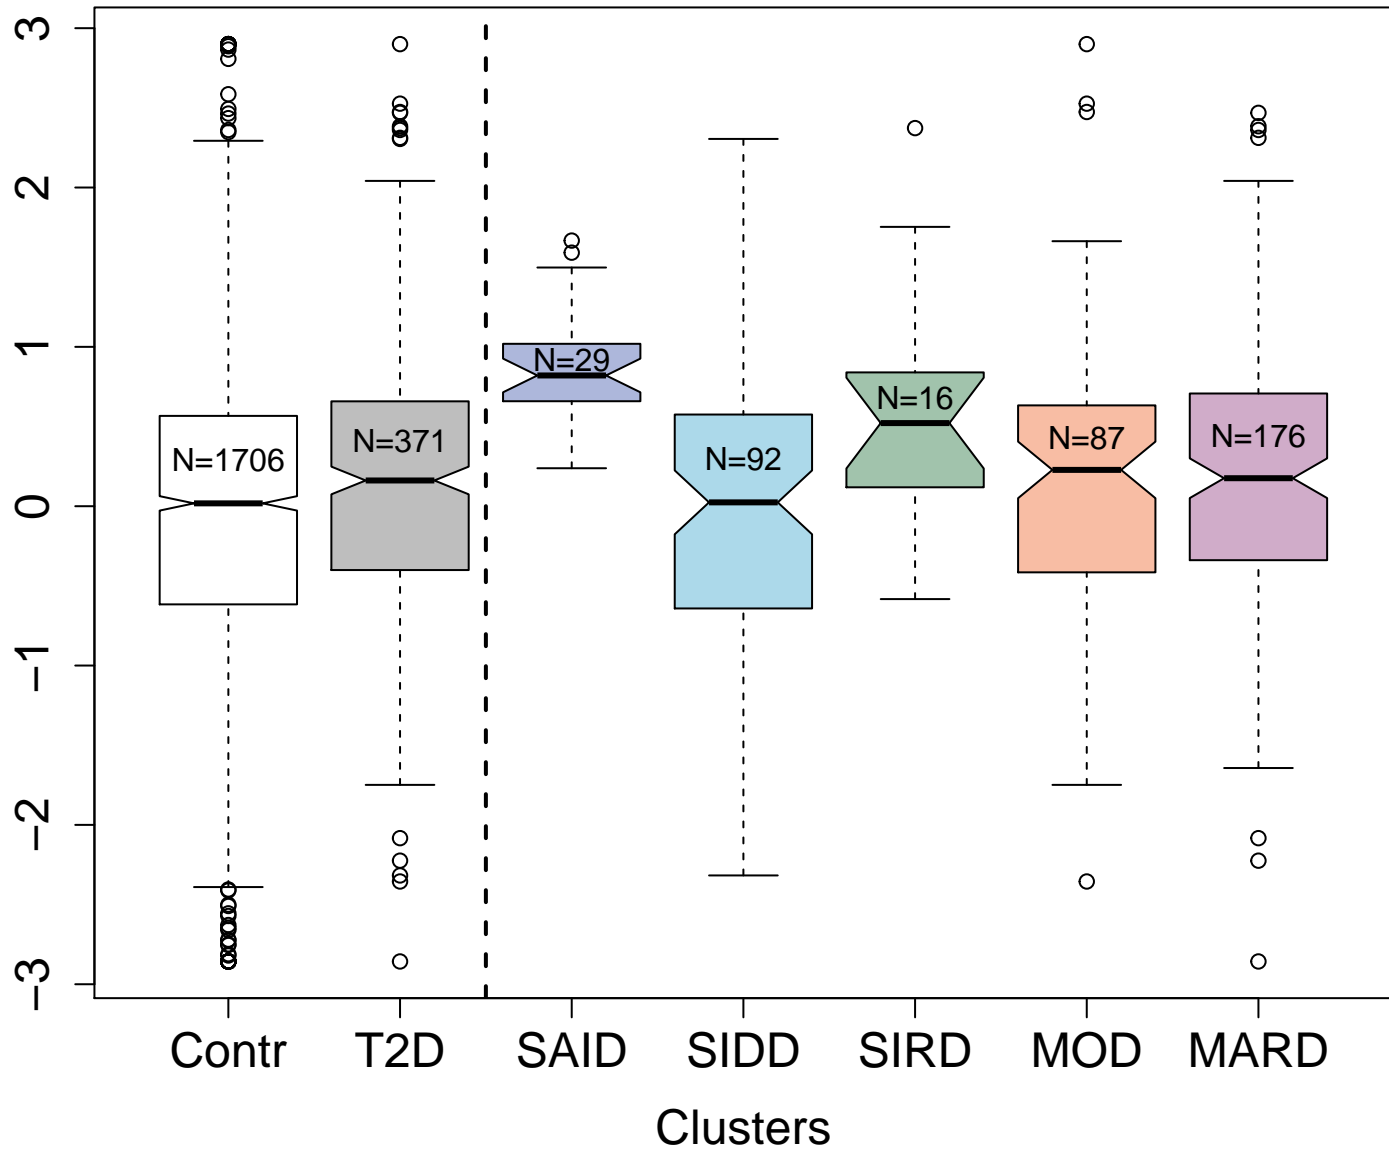



M33972 : 10-nonadecenoate (19:1n9)

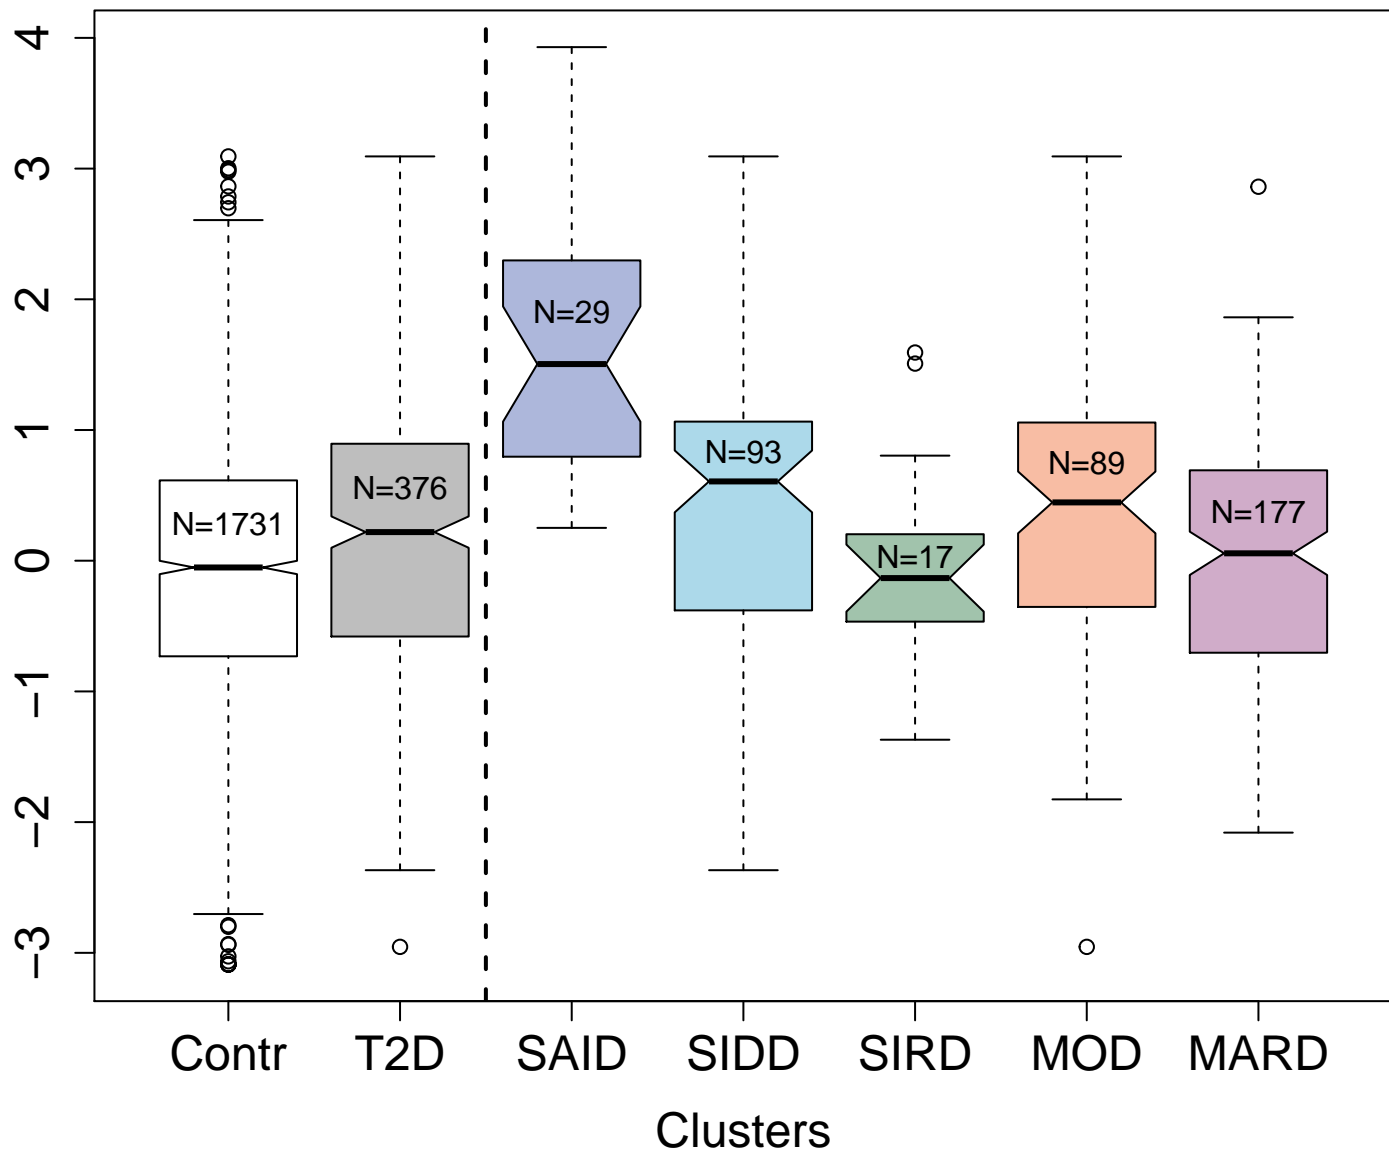

M63061 : pantoate

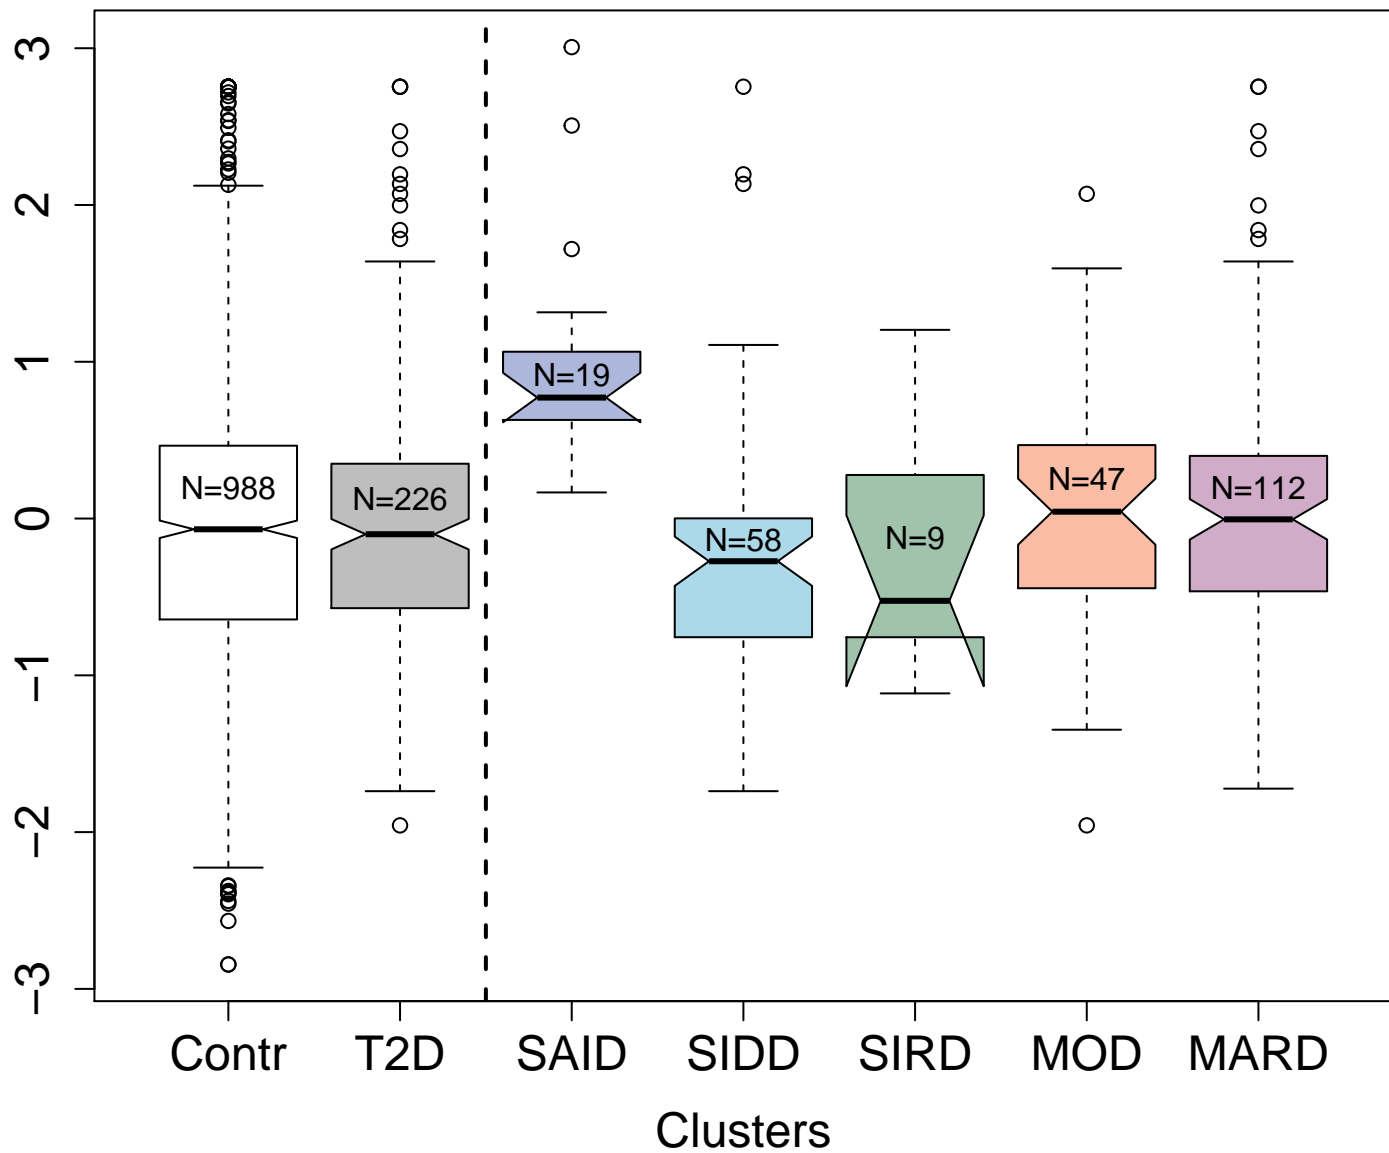

M33969 : stearidonate (18:4n3)

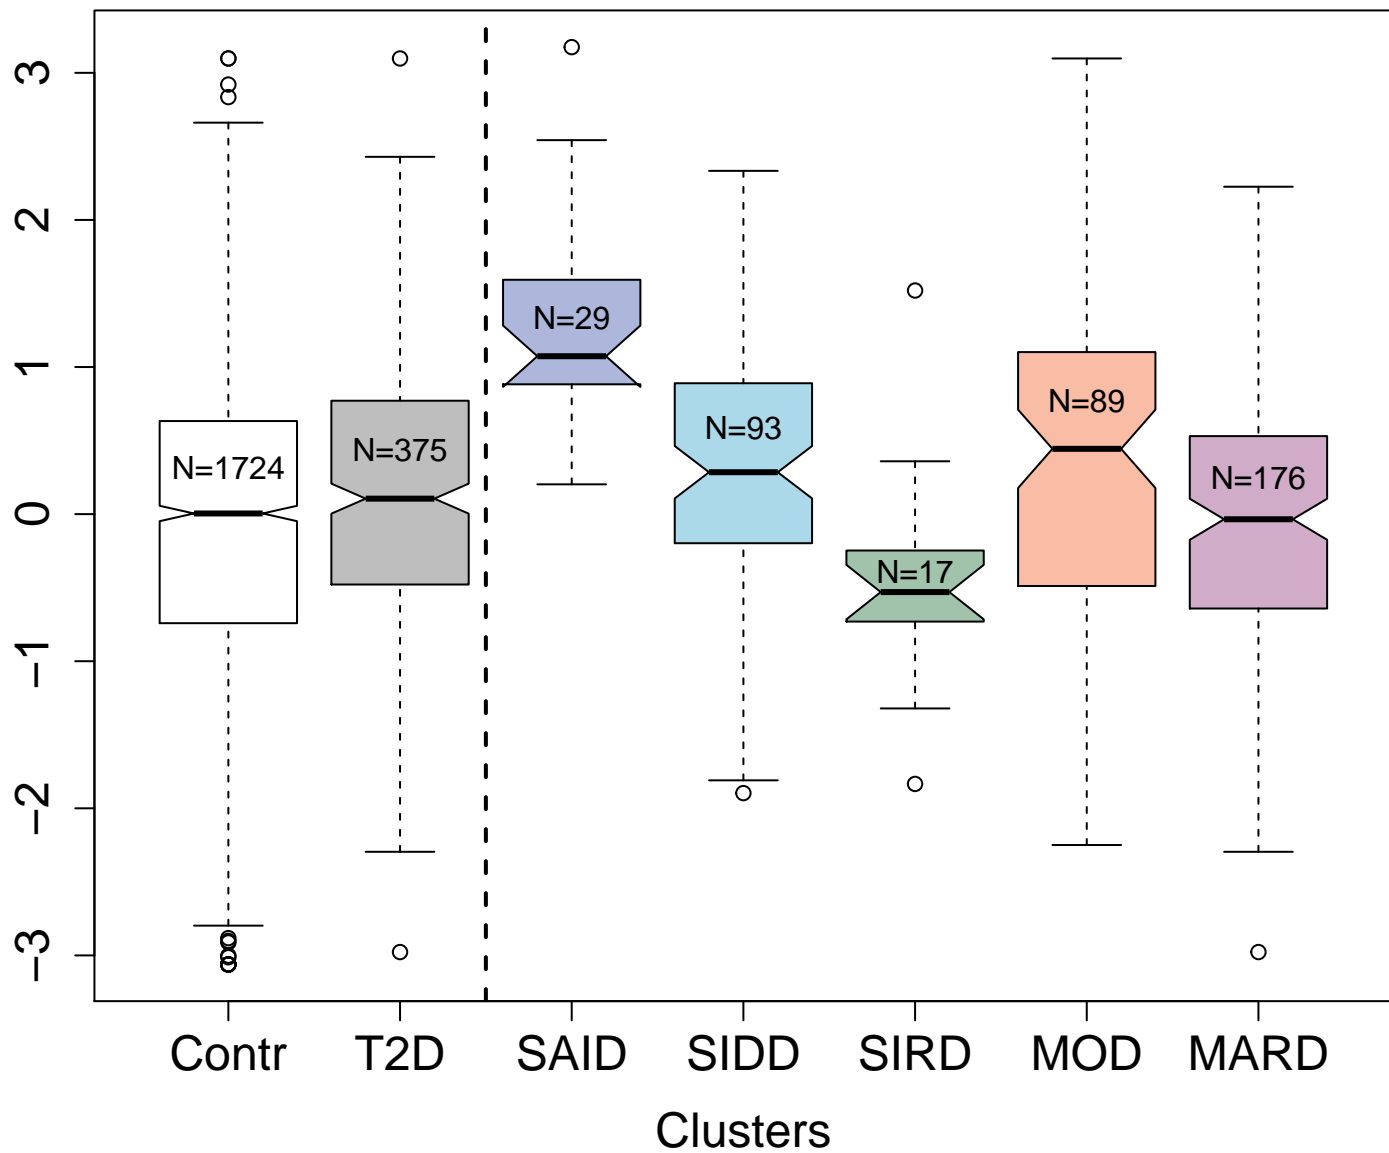

M2761 : thyroxine

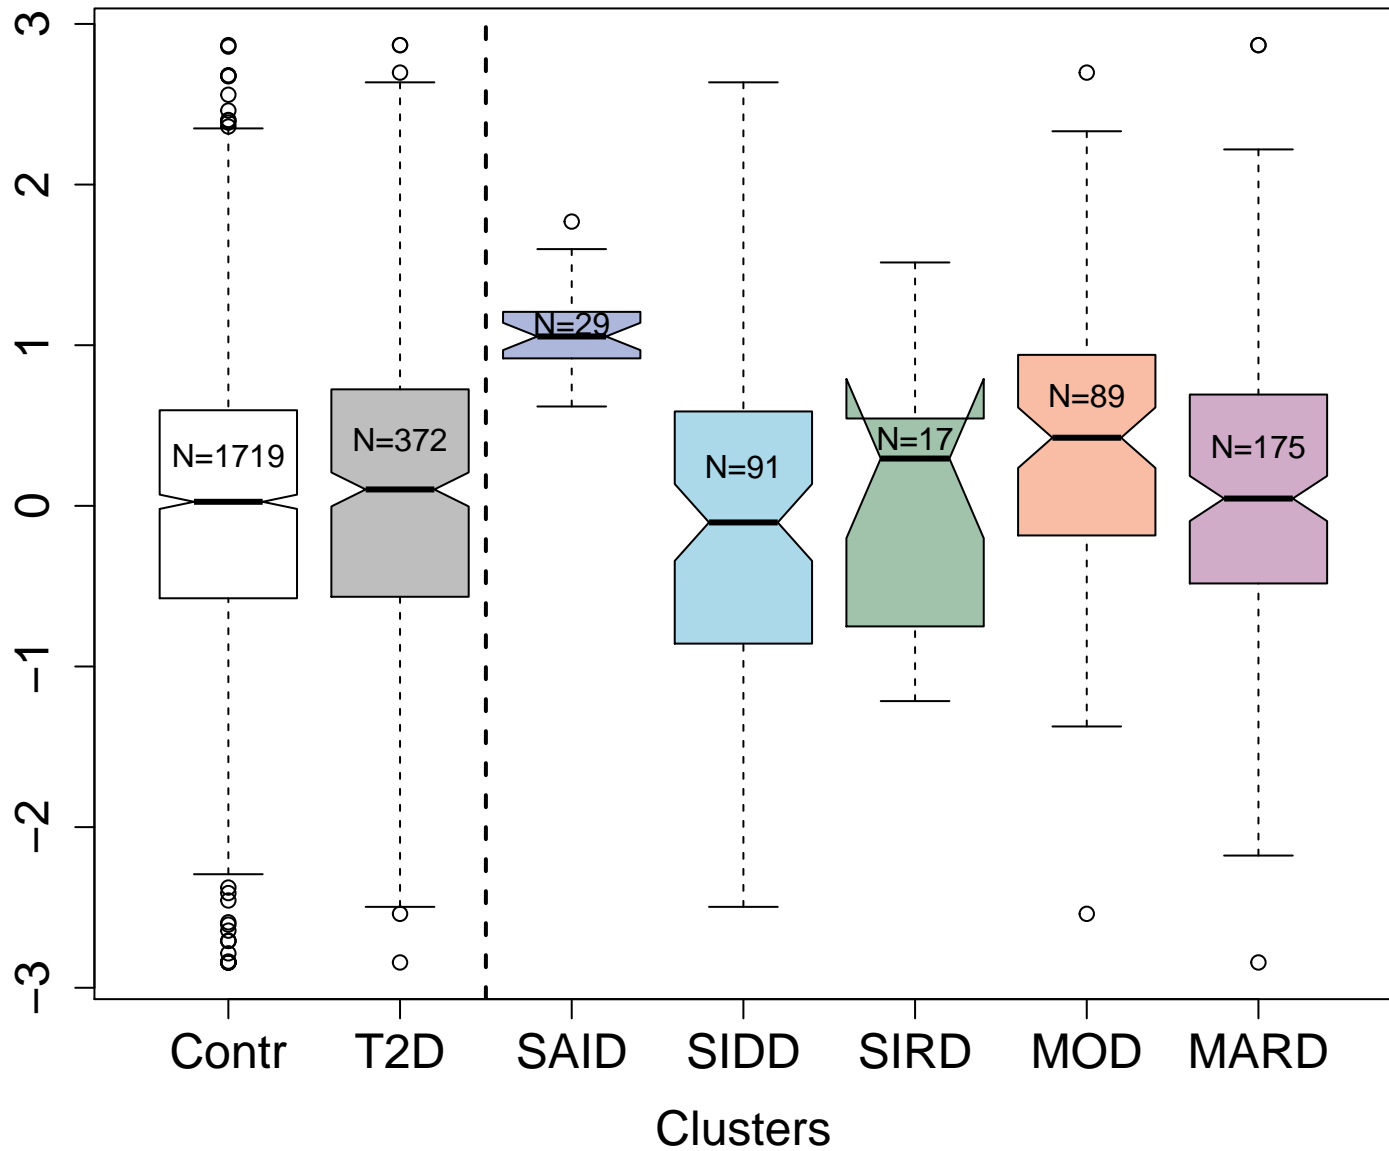

M48457 : 4-methoxyphenol sulfate

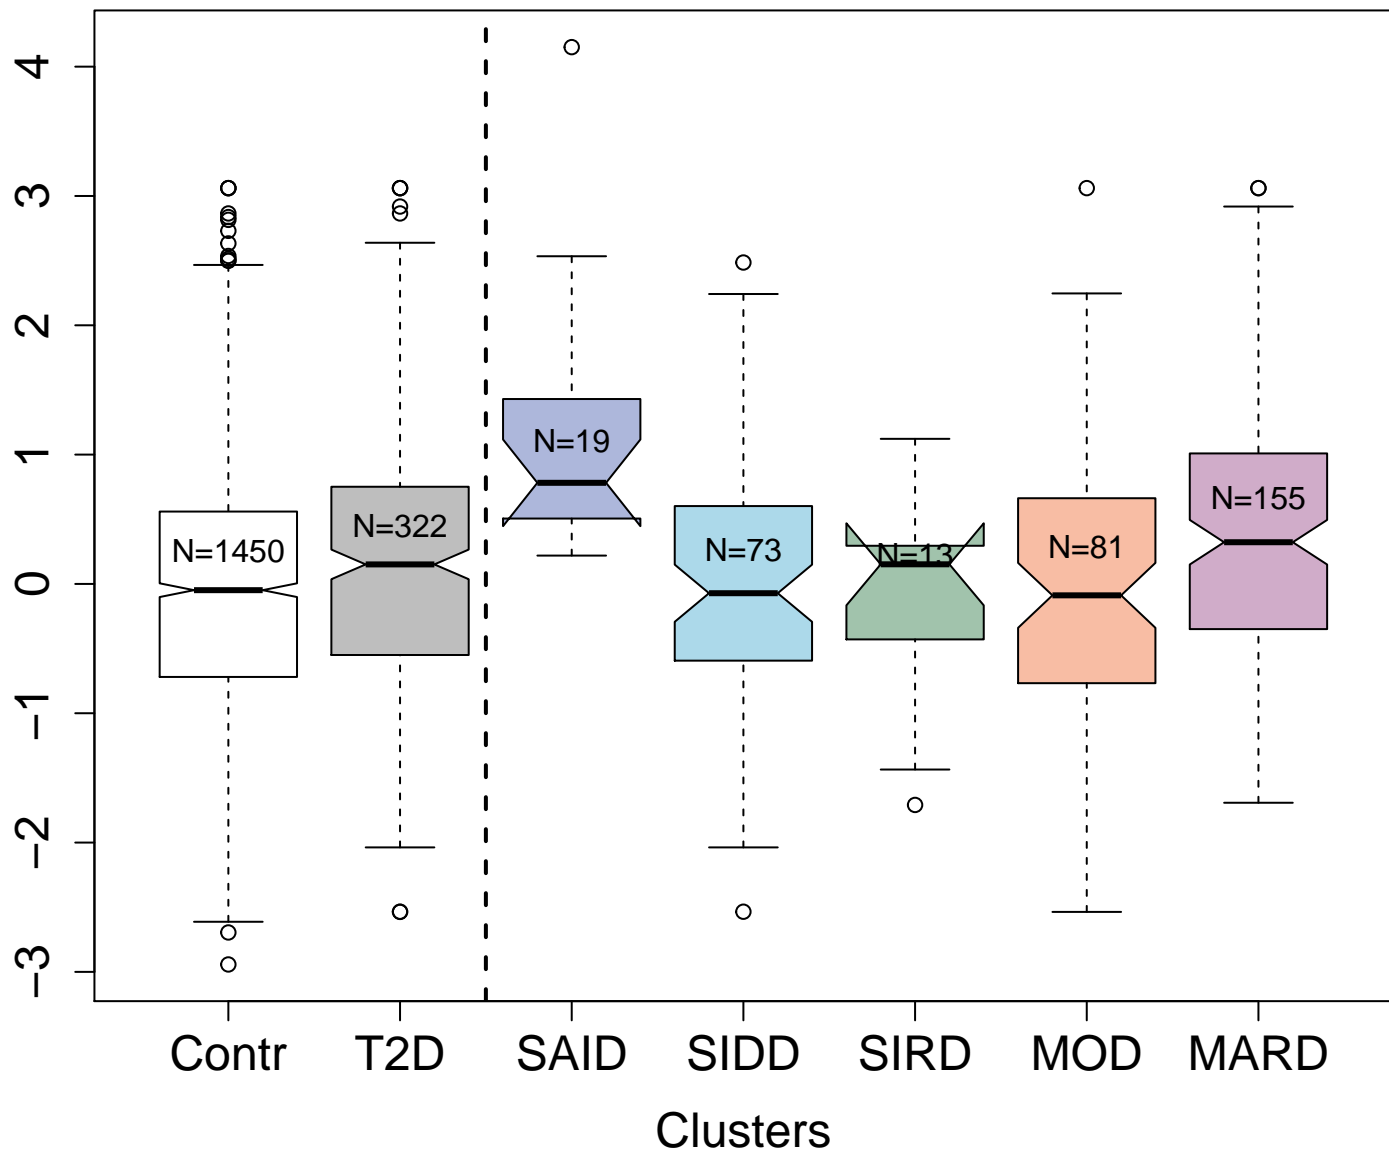

M1336 : palmitate (16:0)

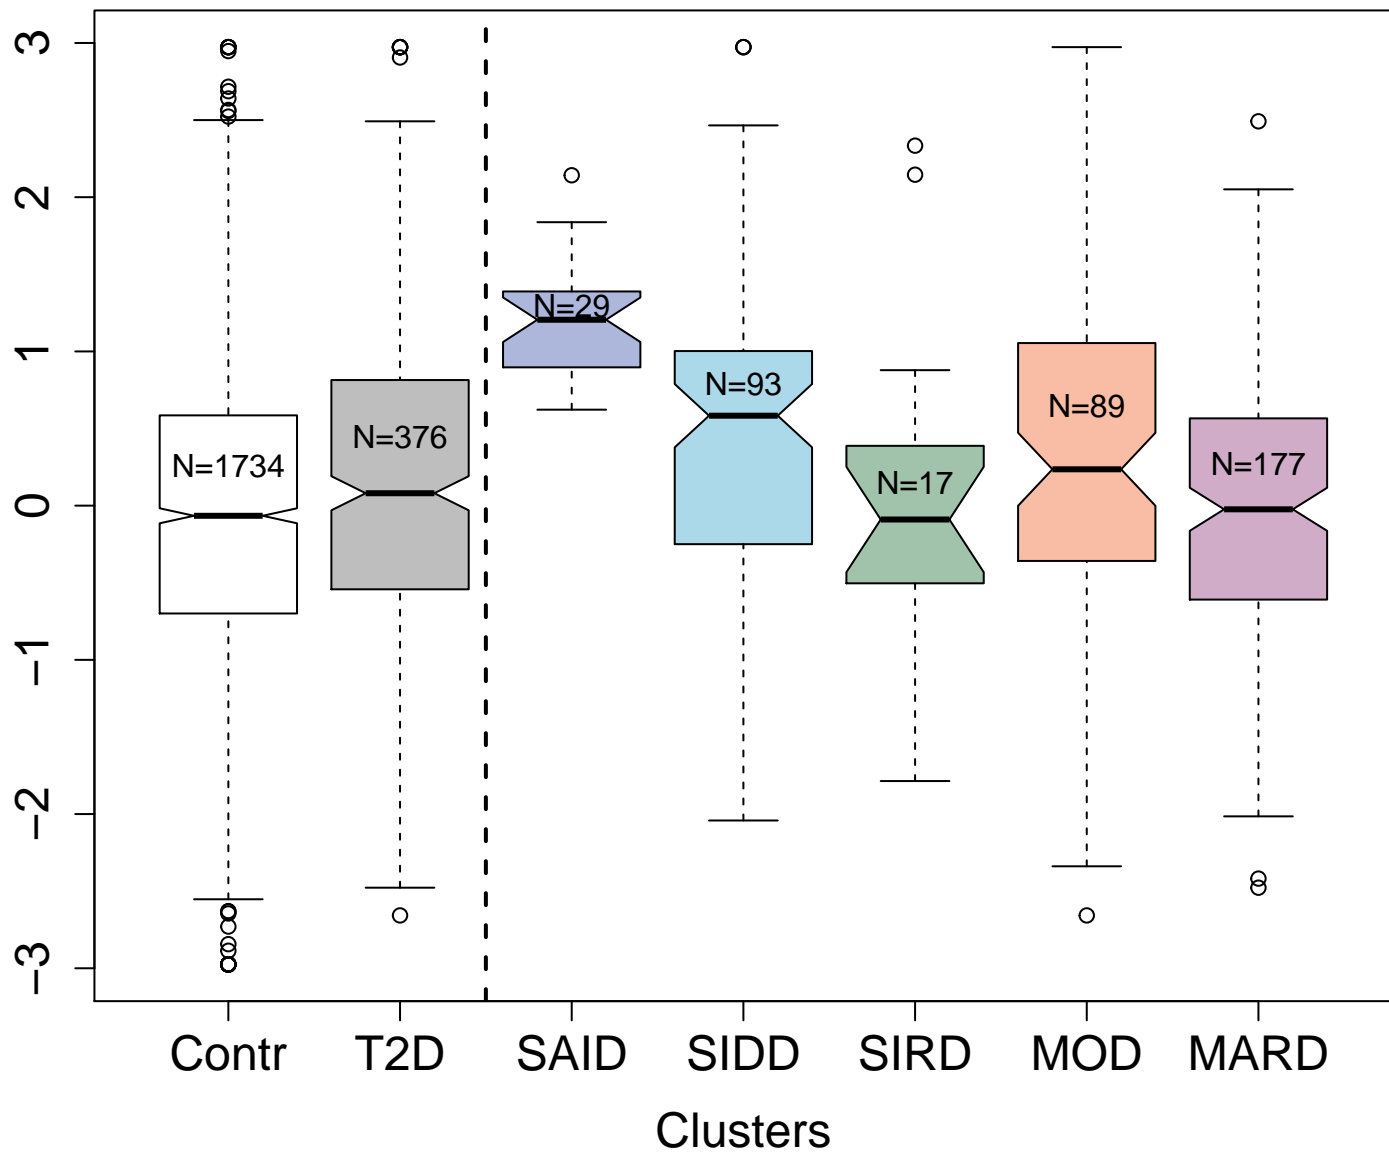

M49679 : X - 23780

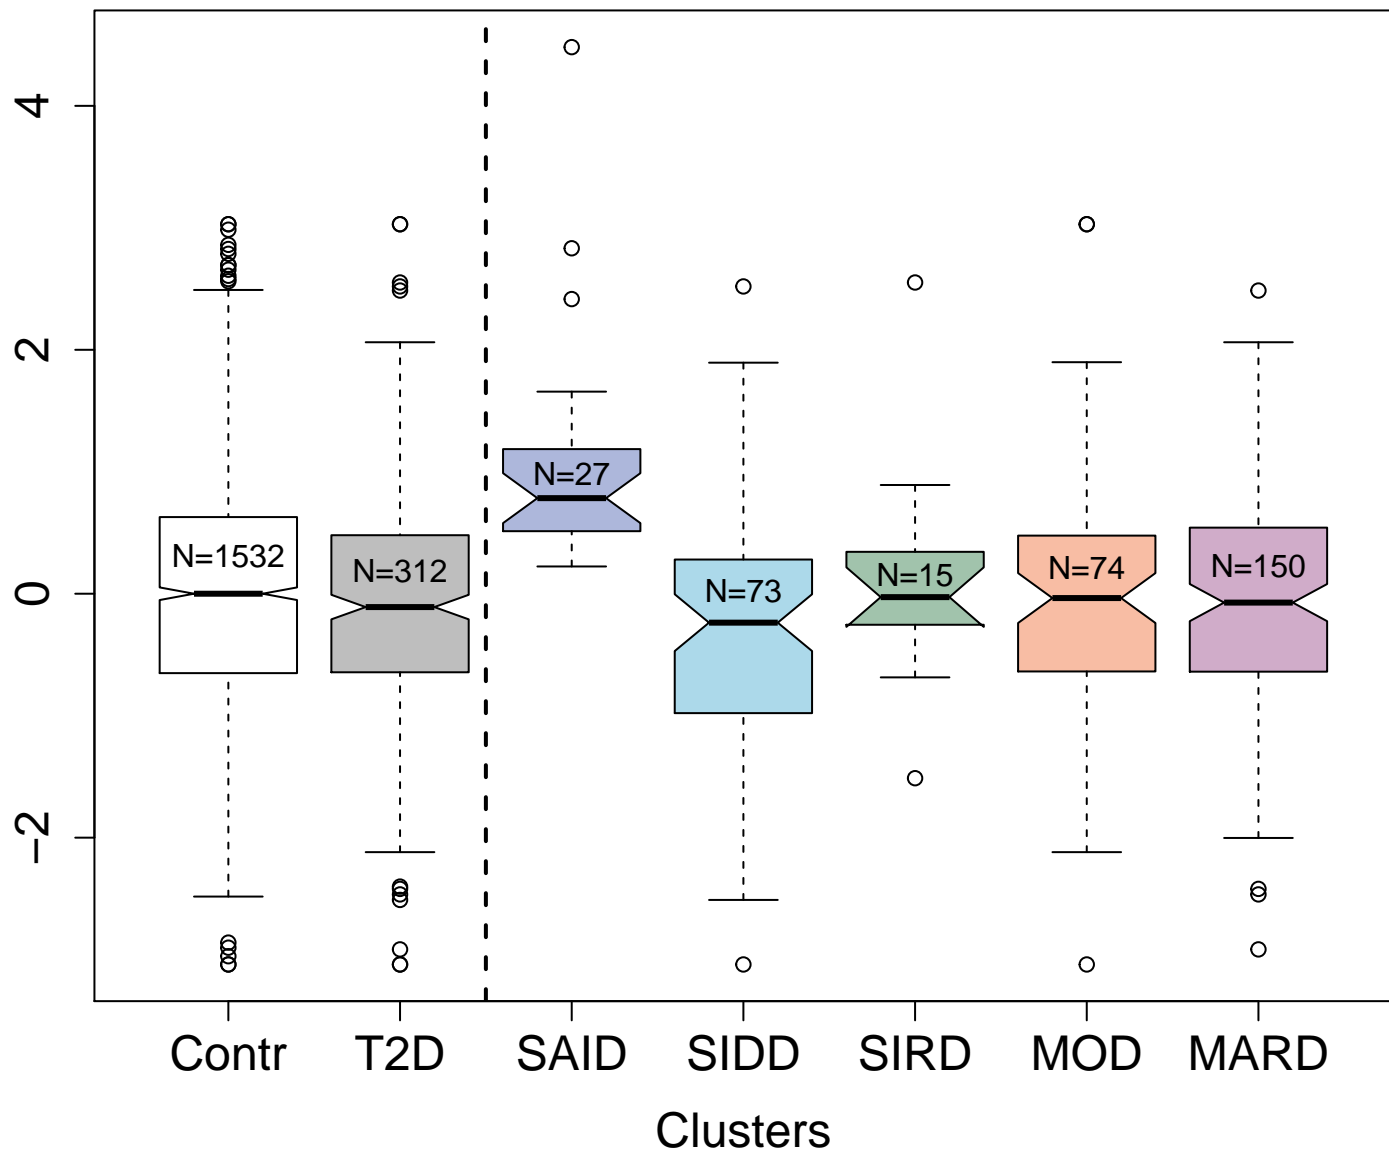

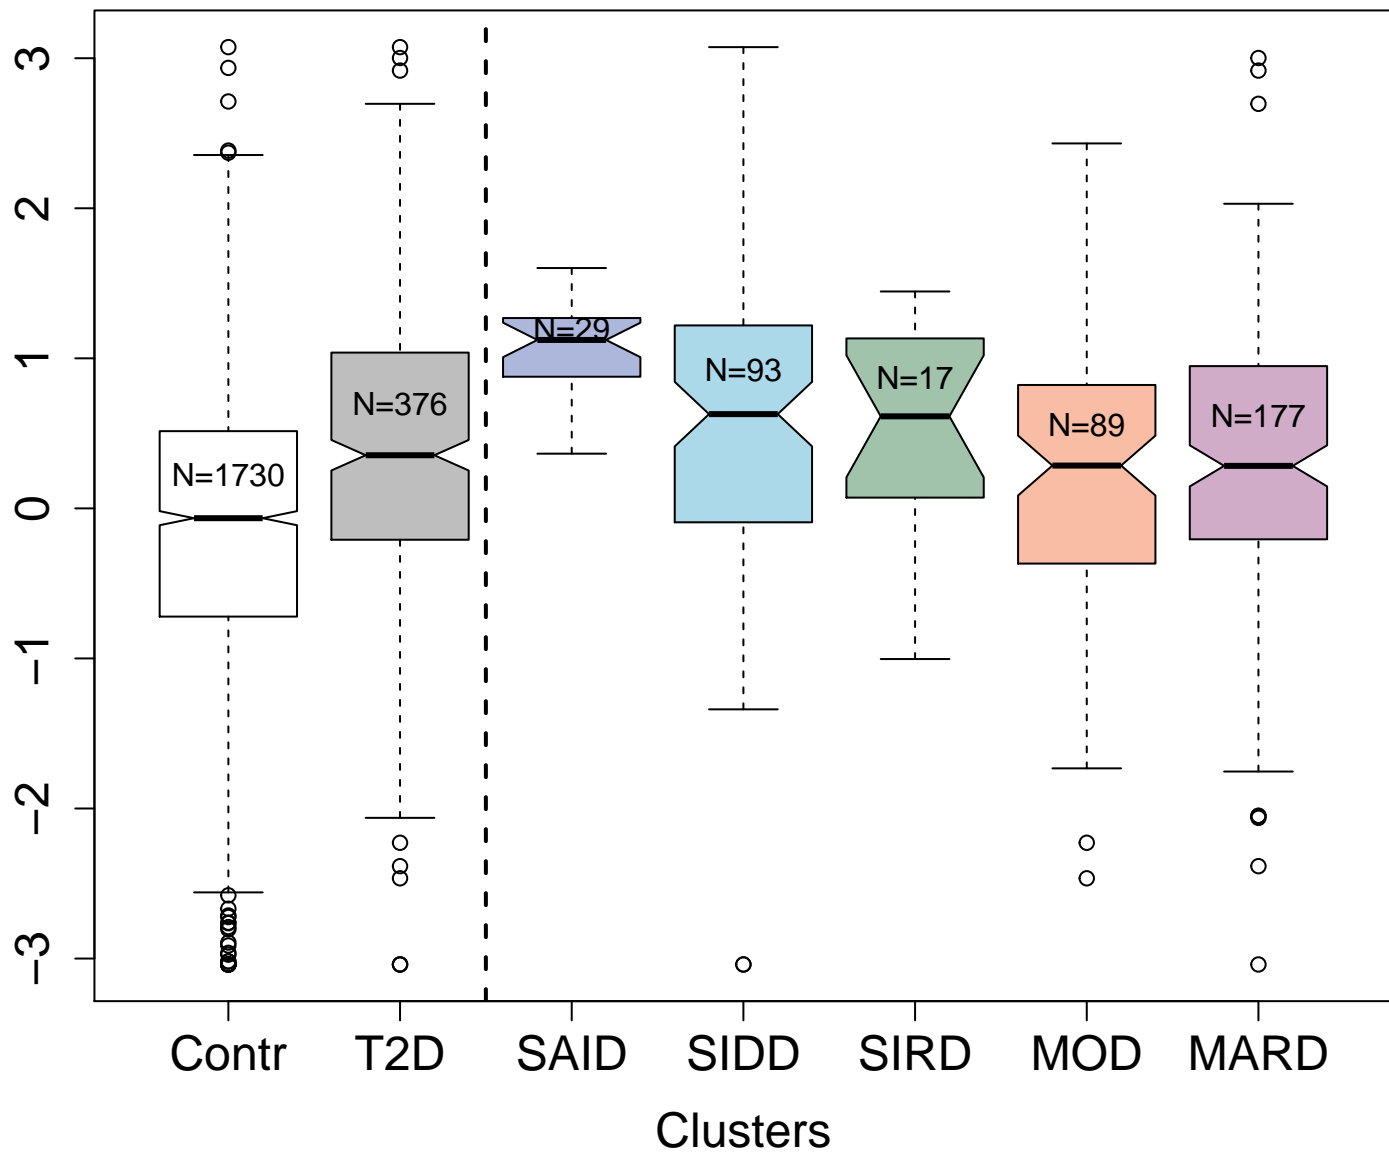



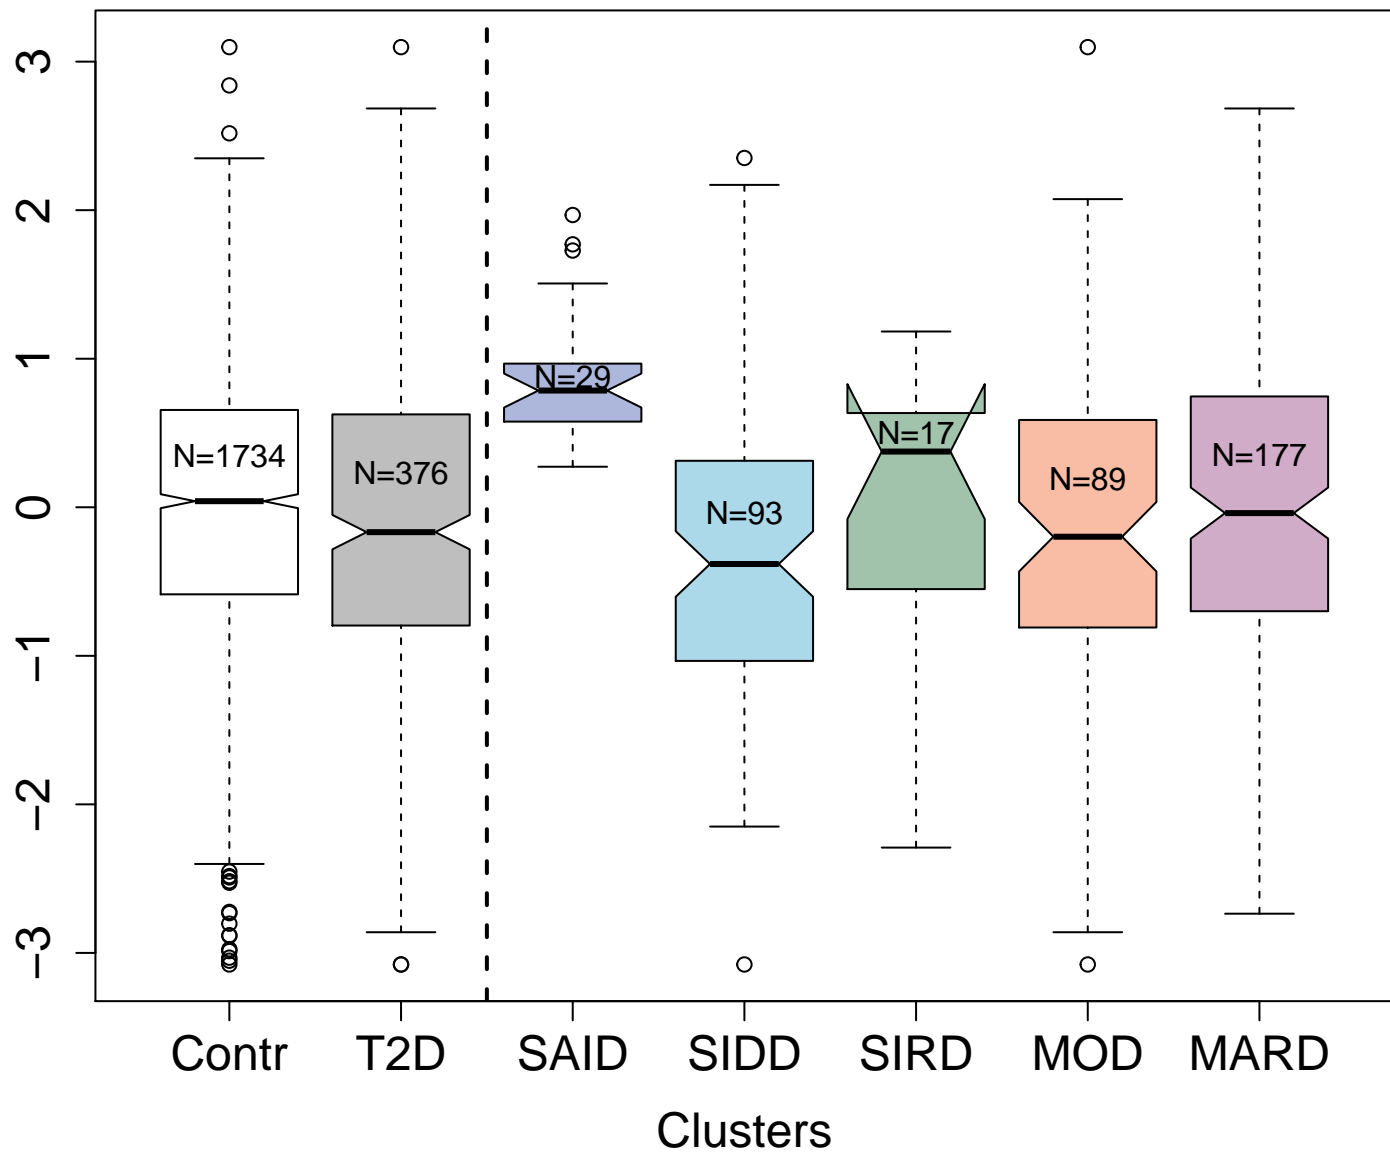

M34387 : N-acetylproline

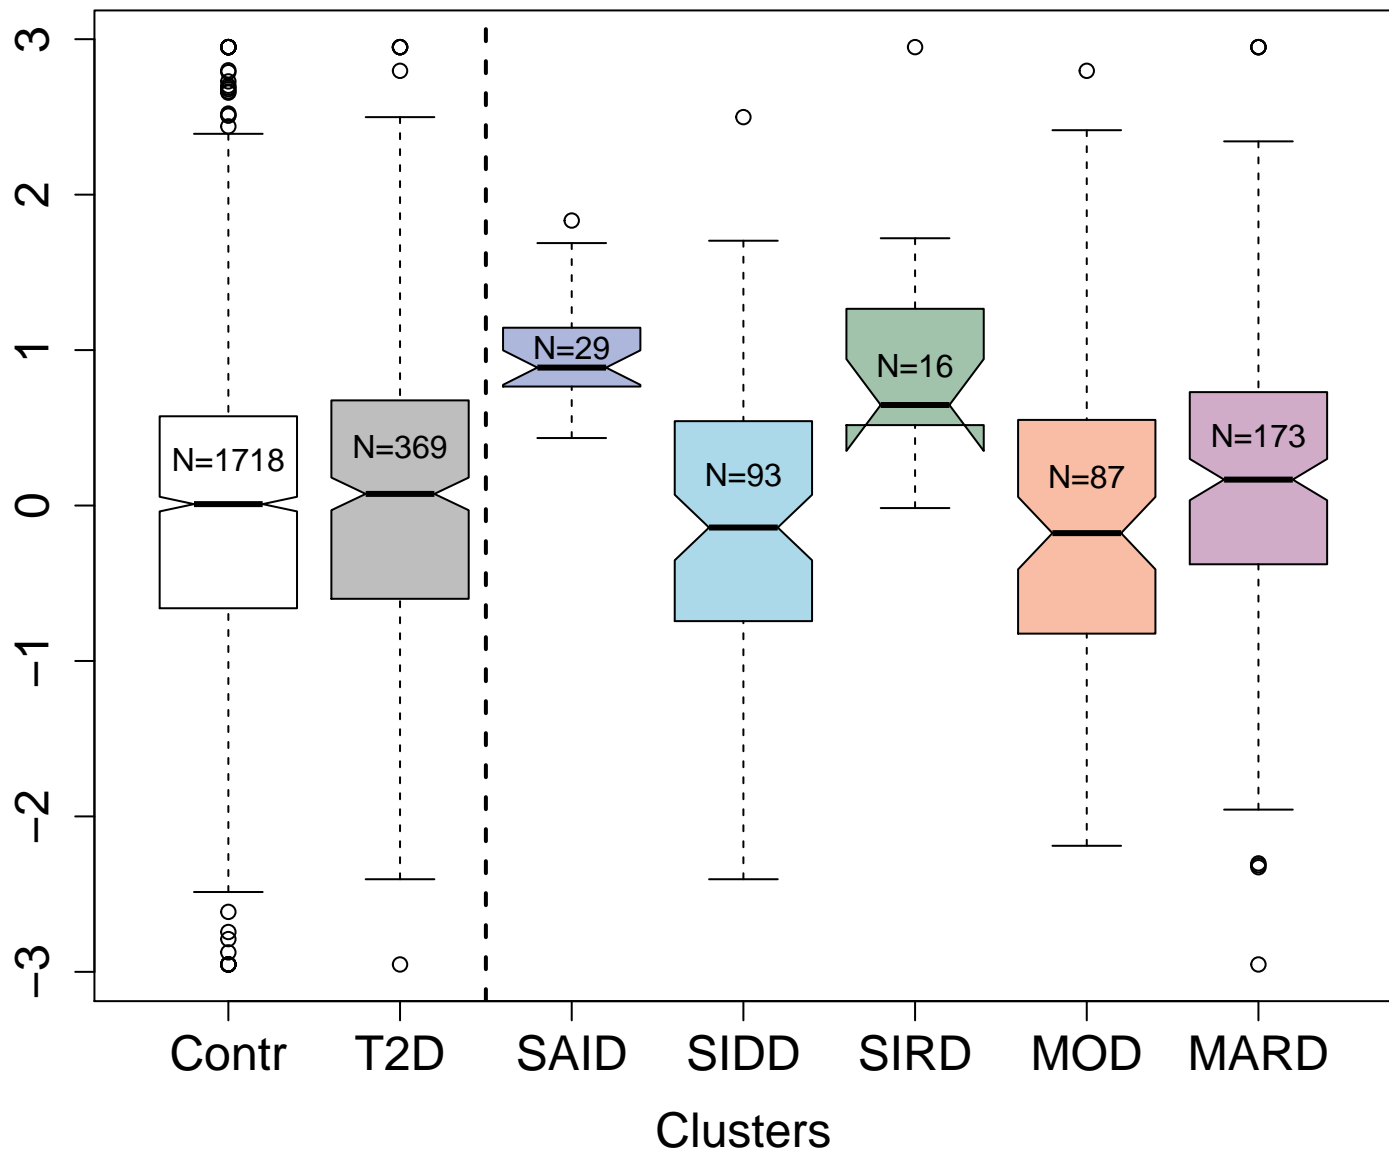

M443 : aspartate

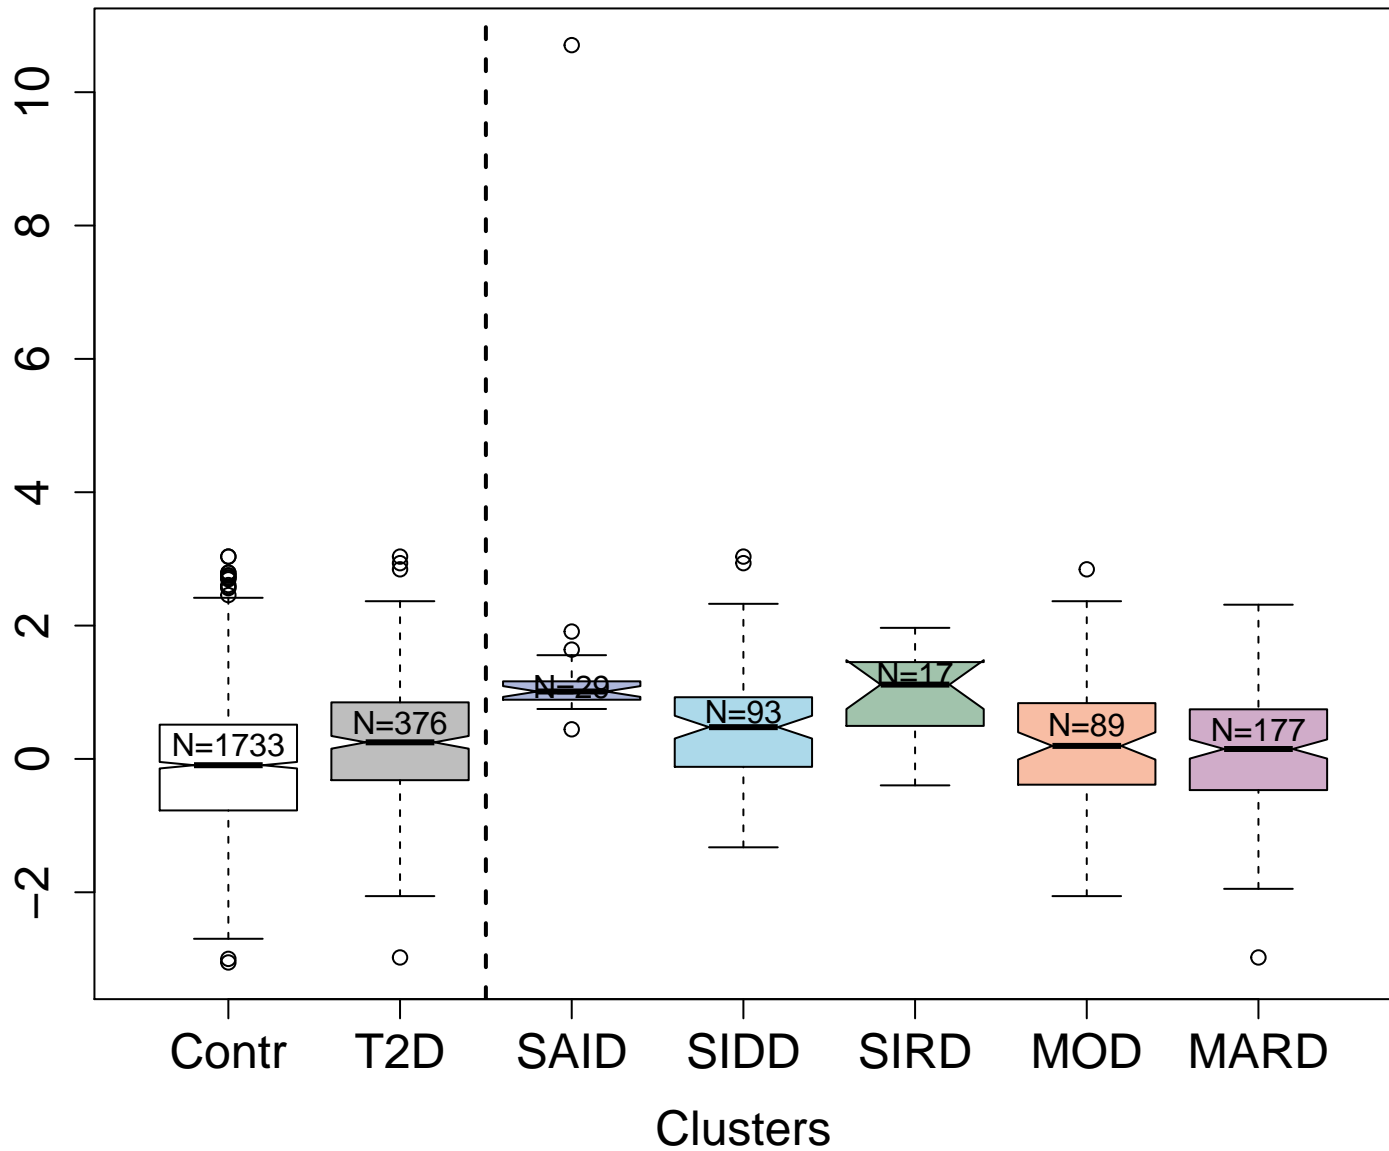

M54923 : beta-citrylglutamate

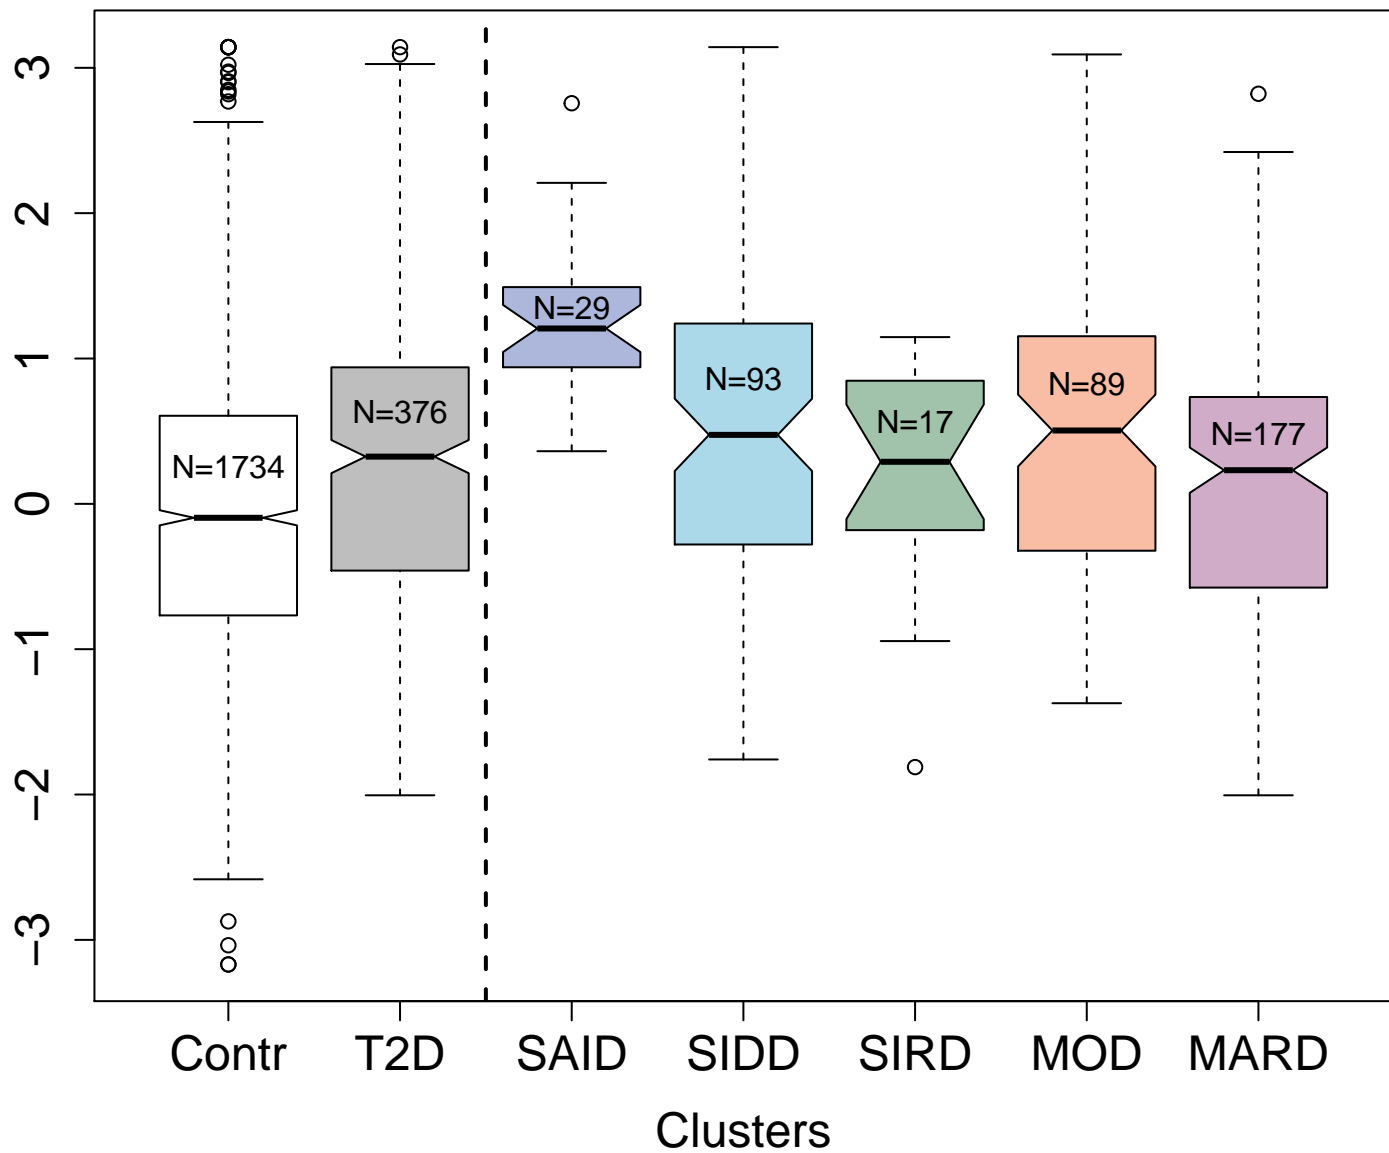

M44681 : palmitoylcarnitine (C16)

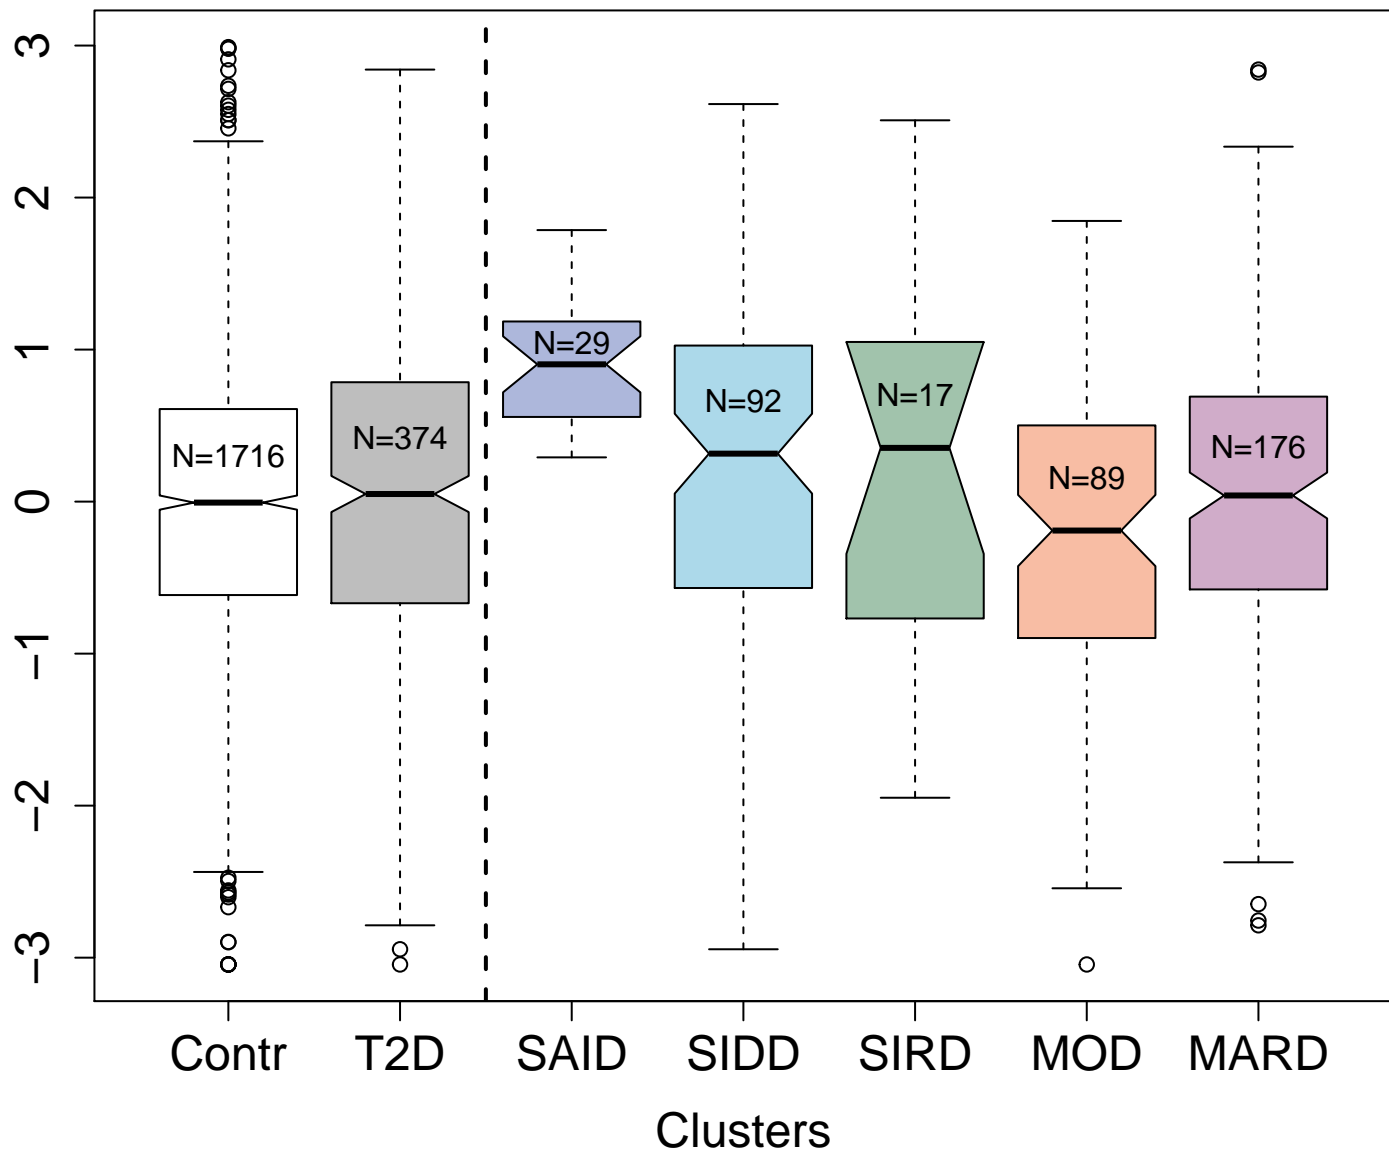

M34035 : inolenate [alpha or gamma; (18:3n3 or 6)]

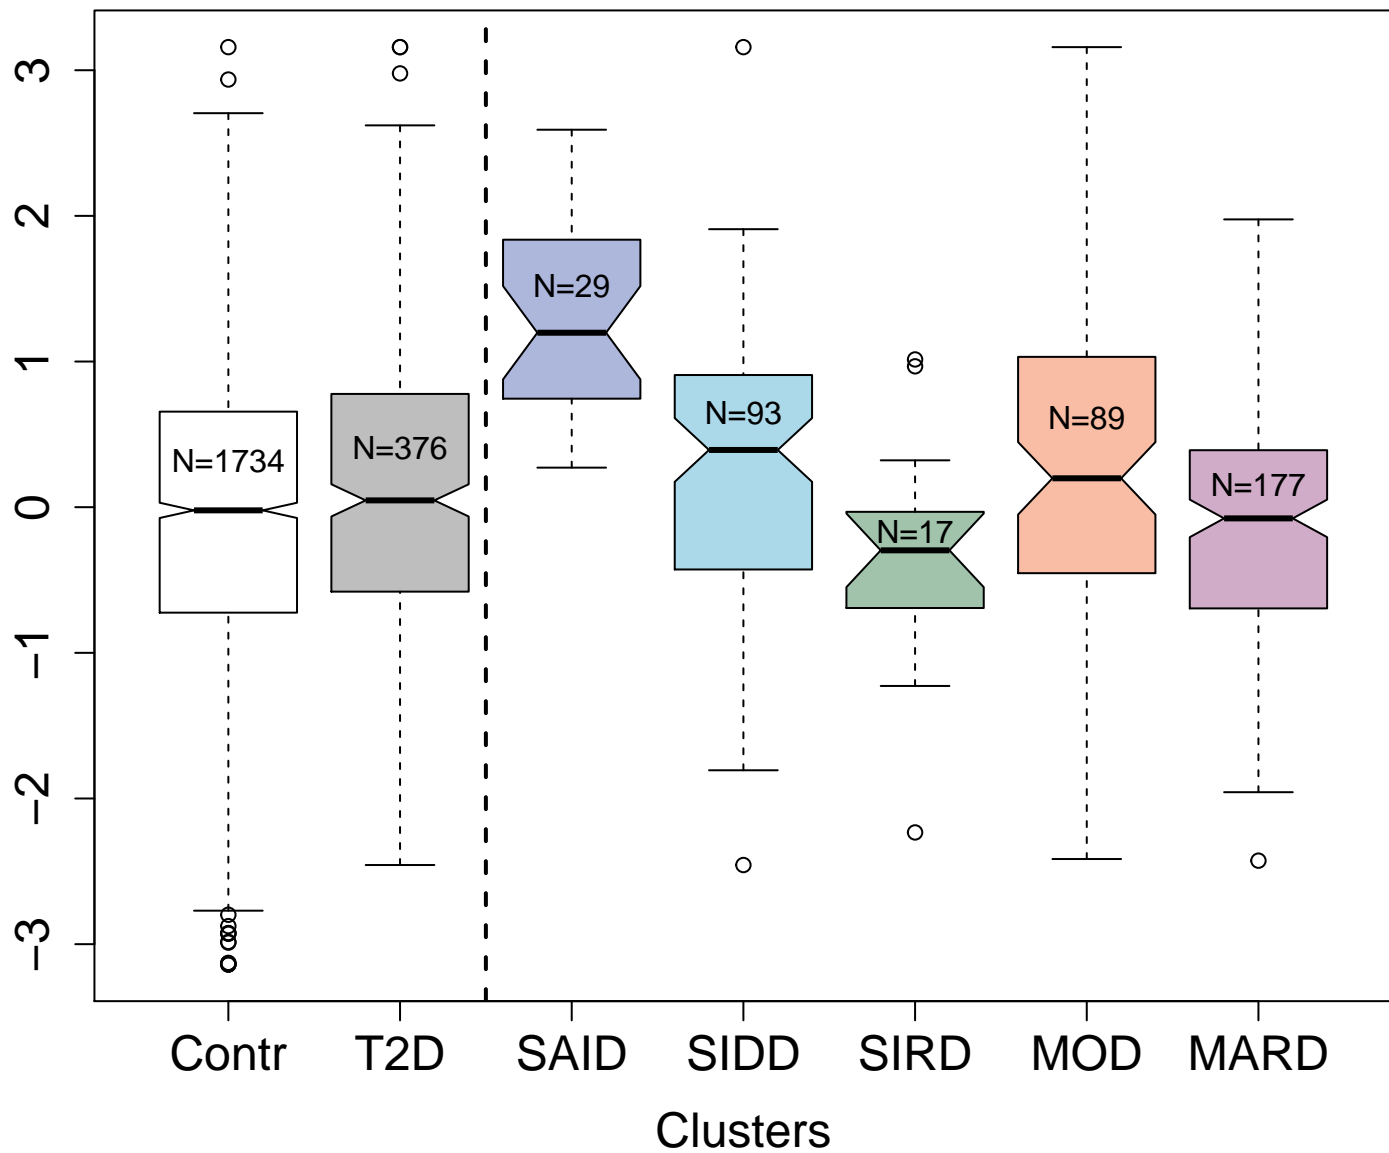

M52447 : 1-stearoyl-2-arachidonoyl-GPE (18:0/20:4)

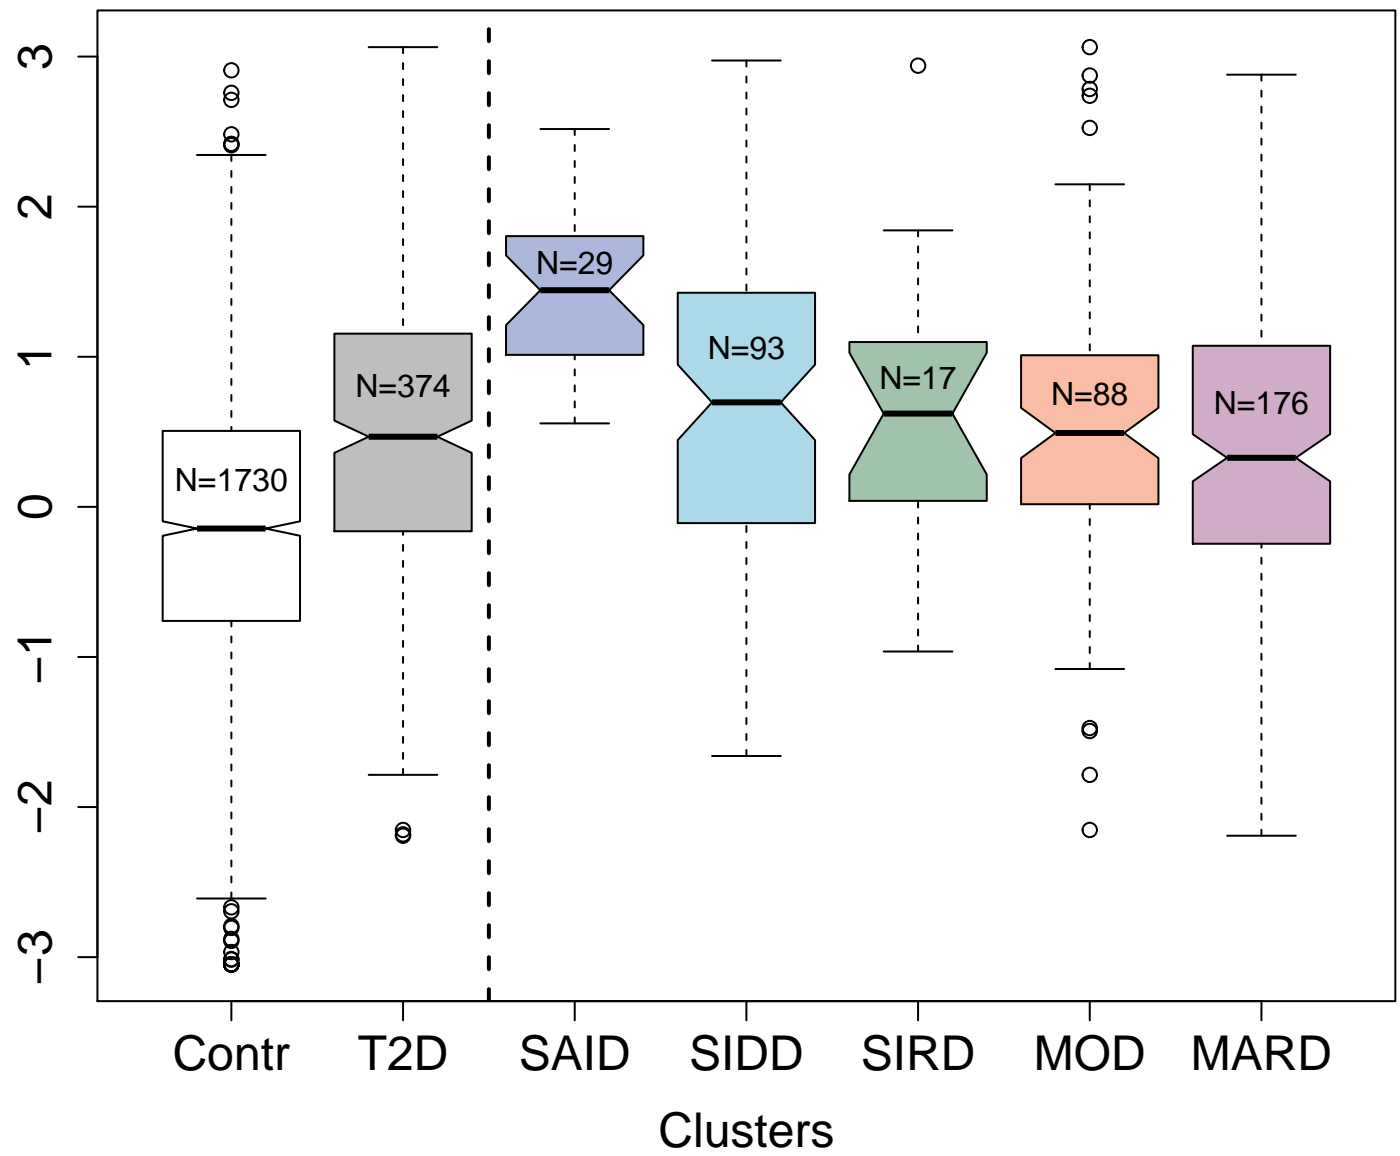

M1124 : myo-inositol

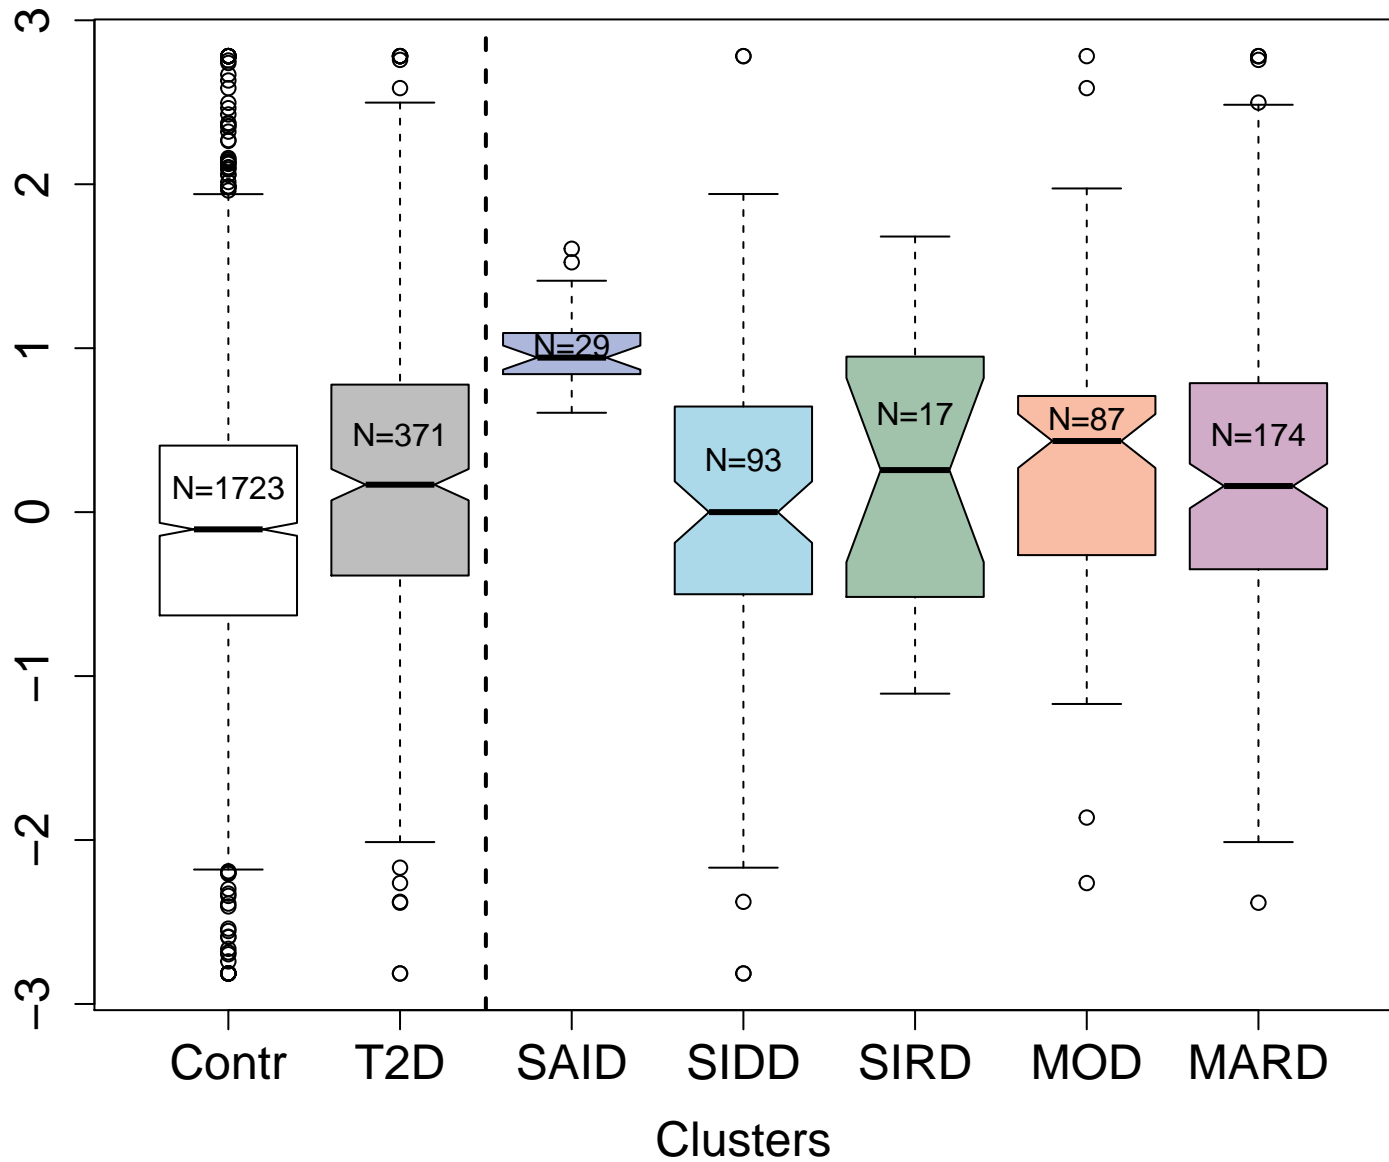



M3141 : betaine

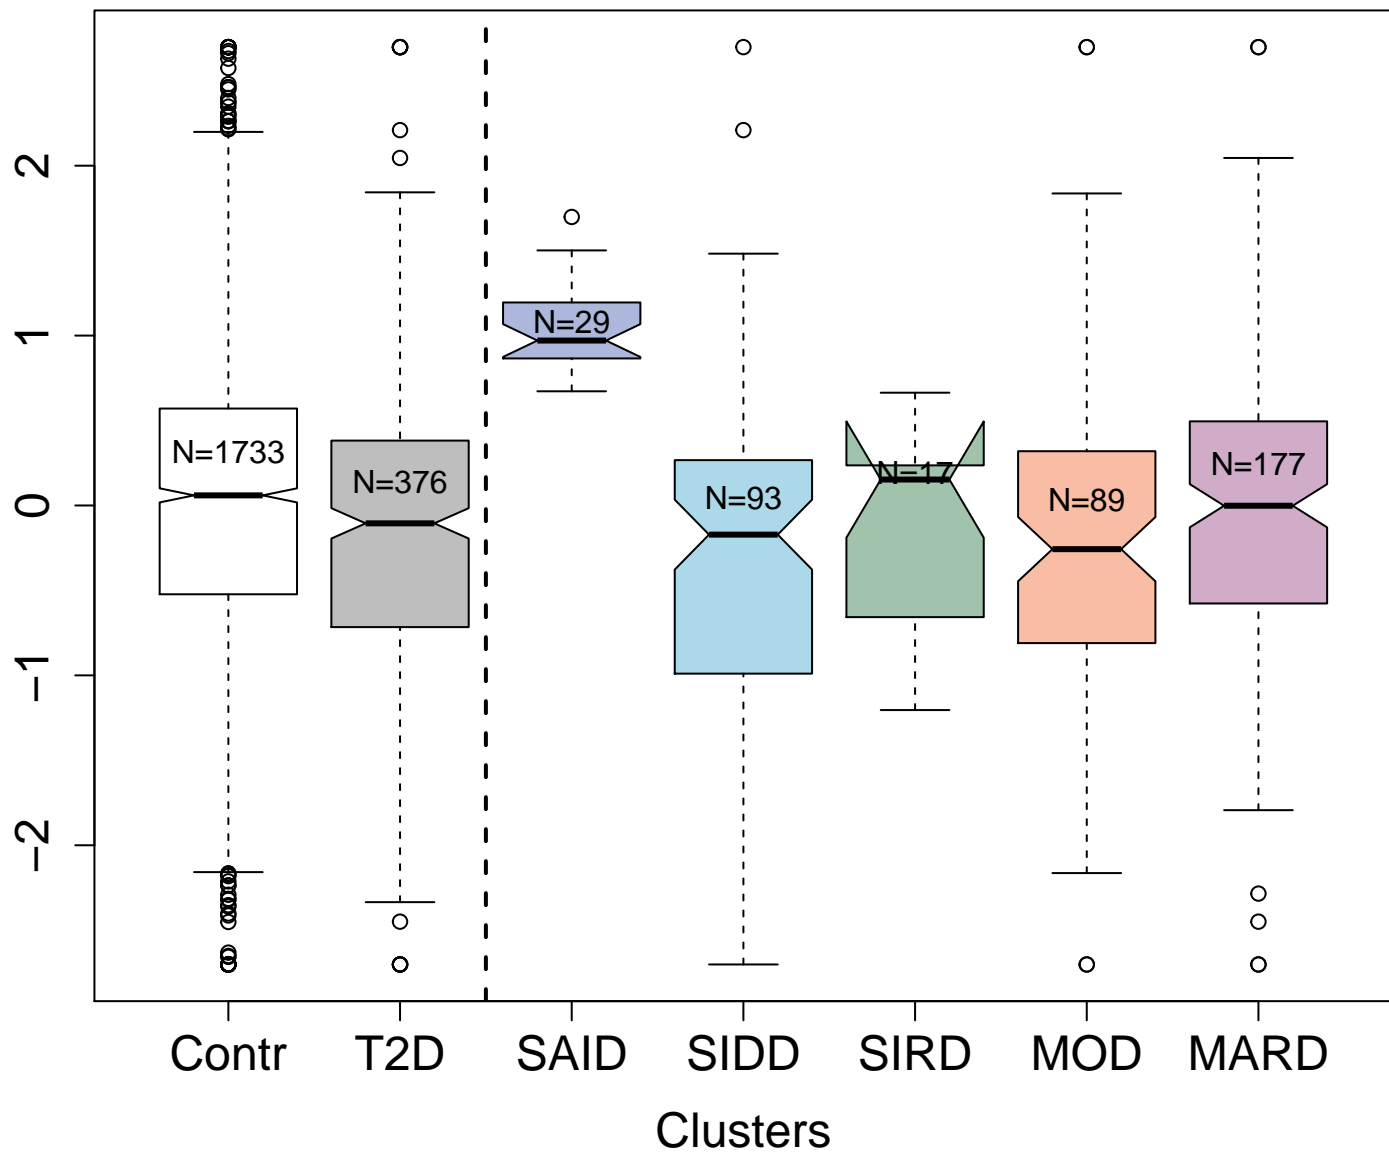

M18374 : methionine sulfoxide

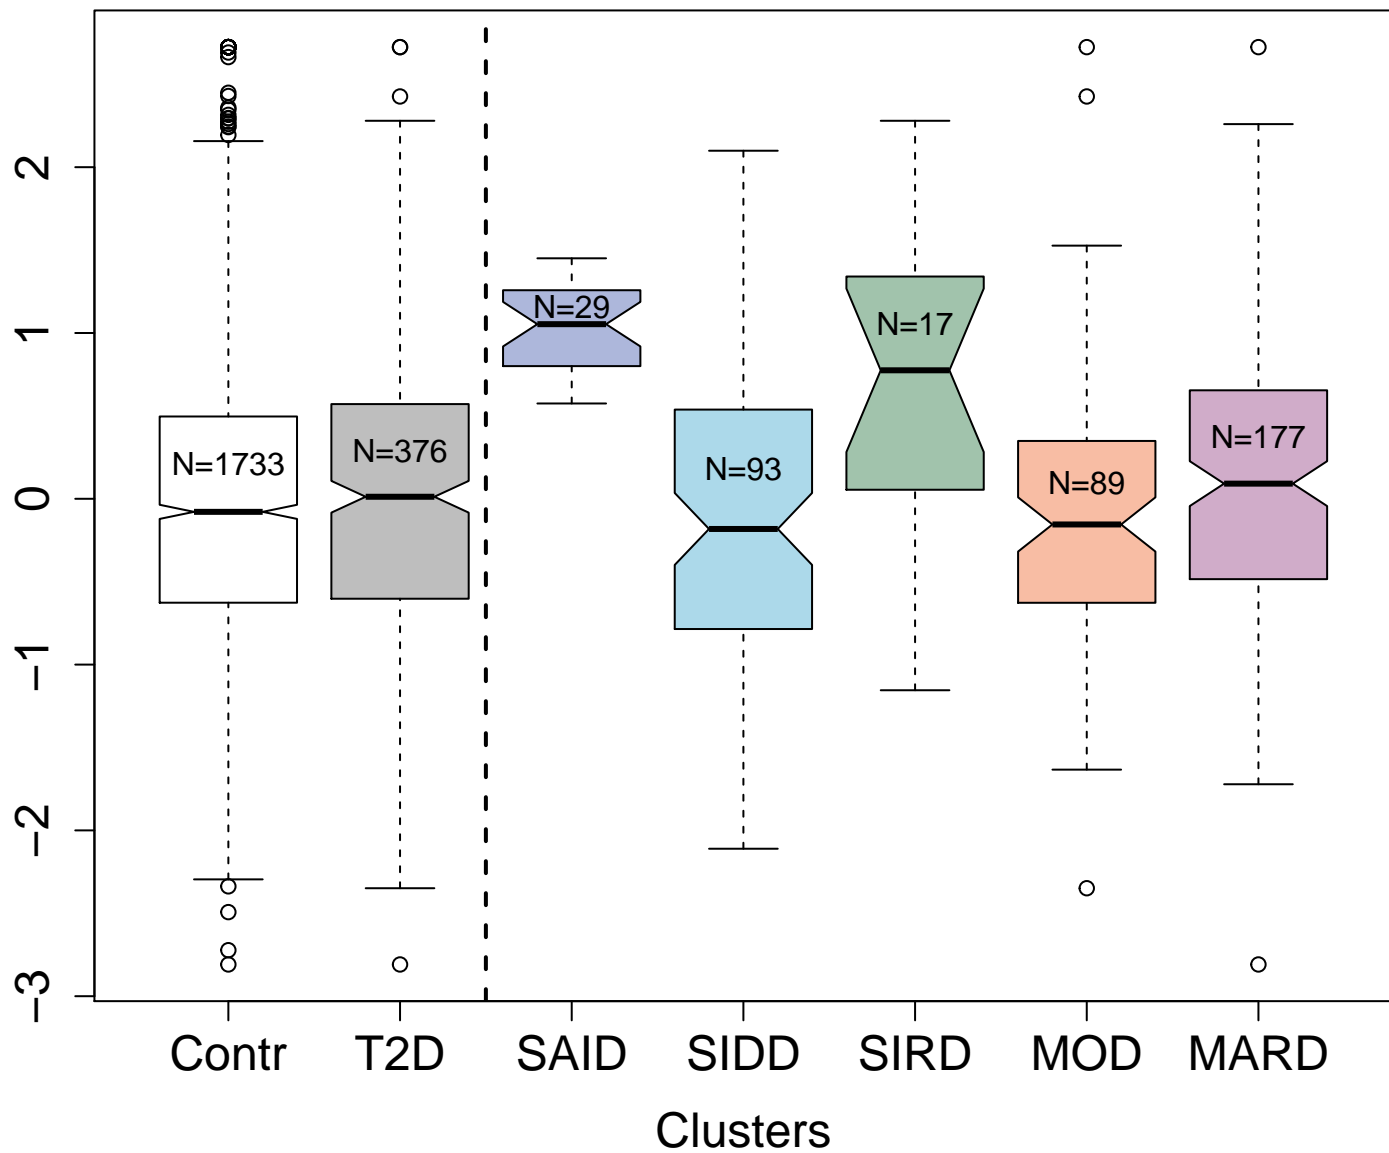

M57453 : glycosyl ceramide (d18:2/24:1, d18:1/24:2)\*

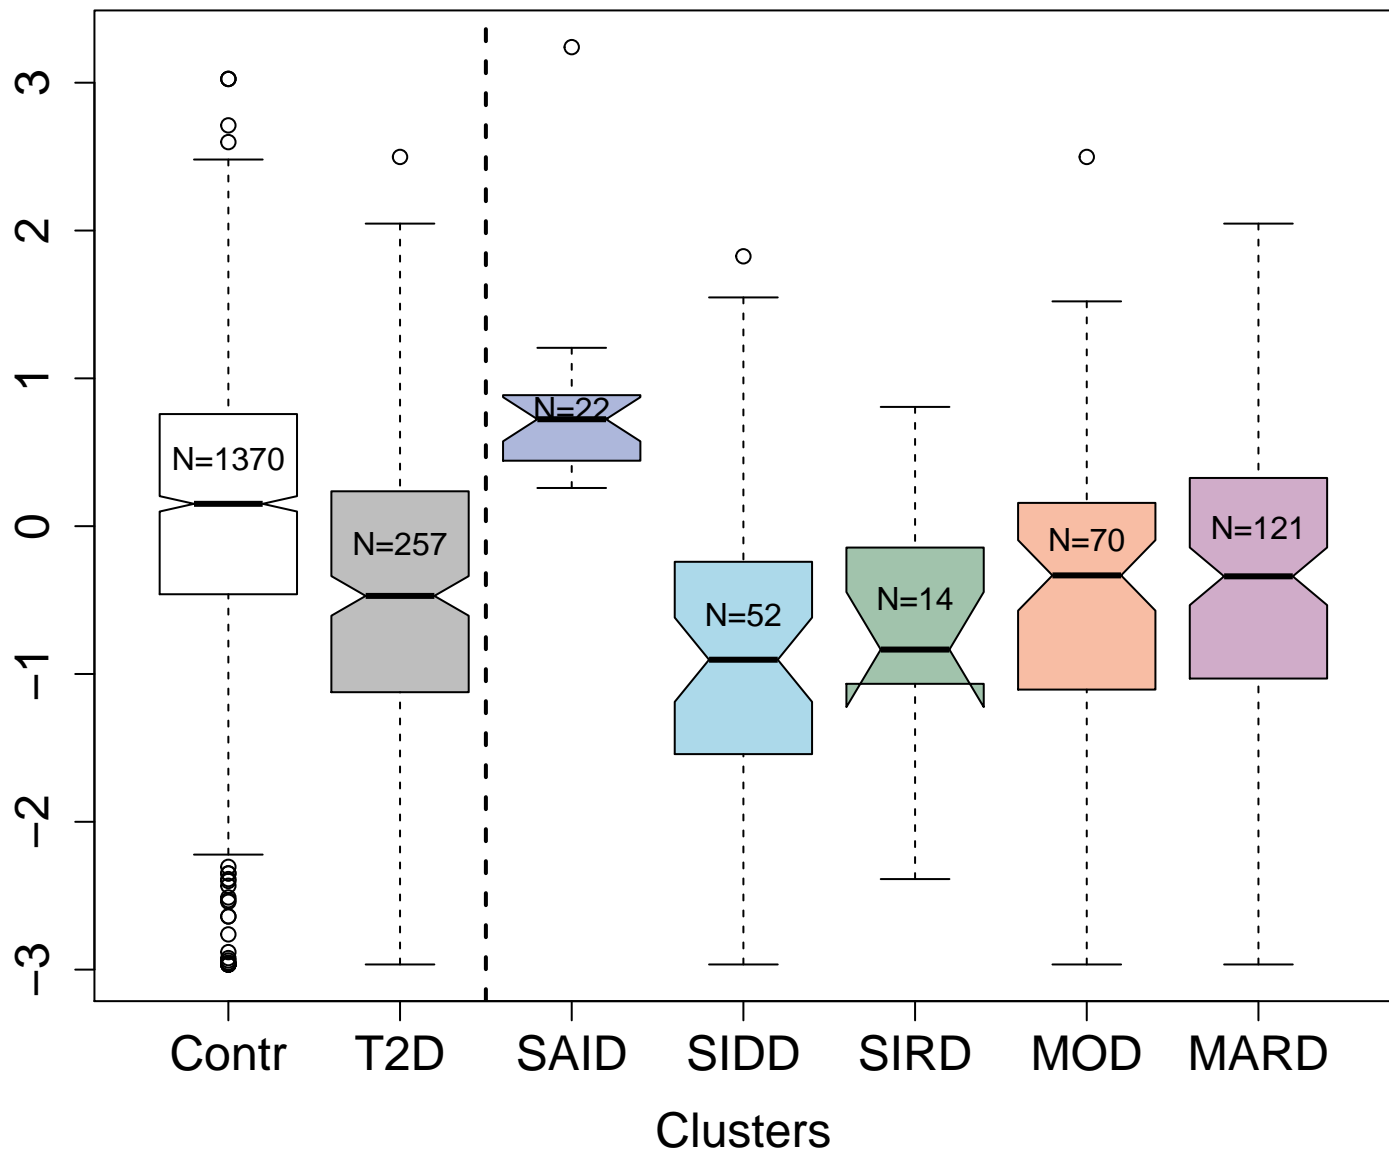

M35186 : 1-arachidonoyl-GPE (20:4n6)\*

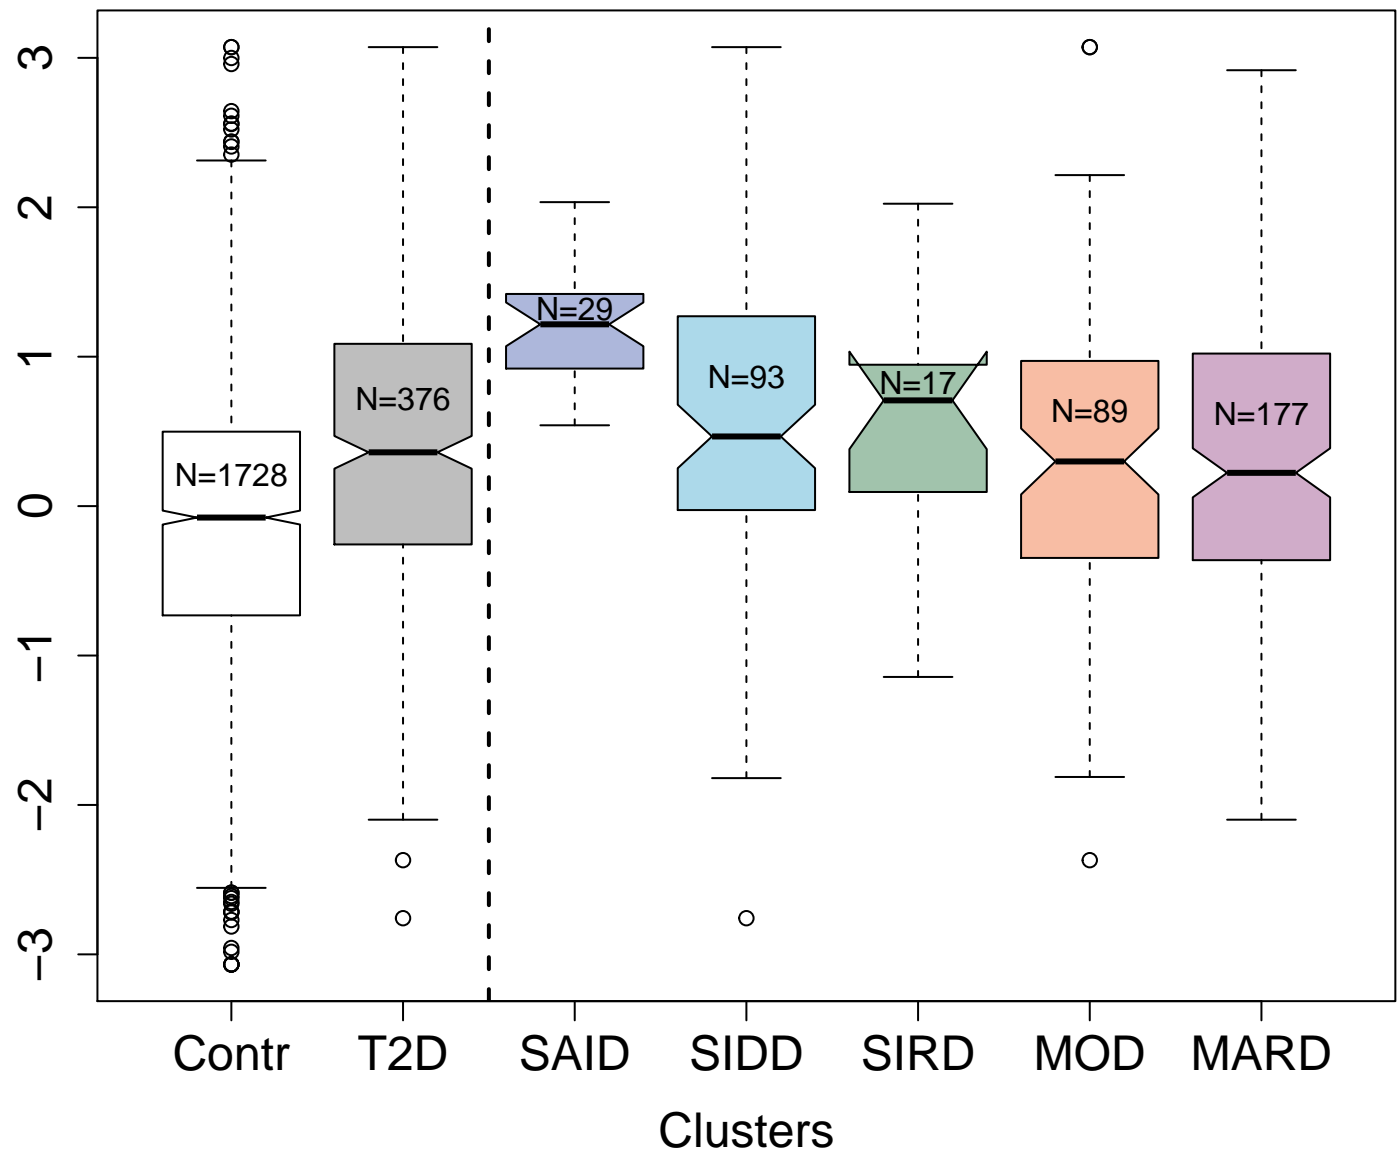

M62278 : histidine betaine (hercynine)\*

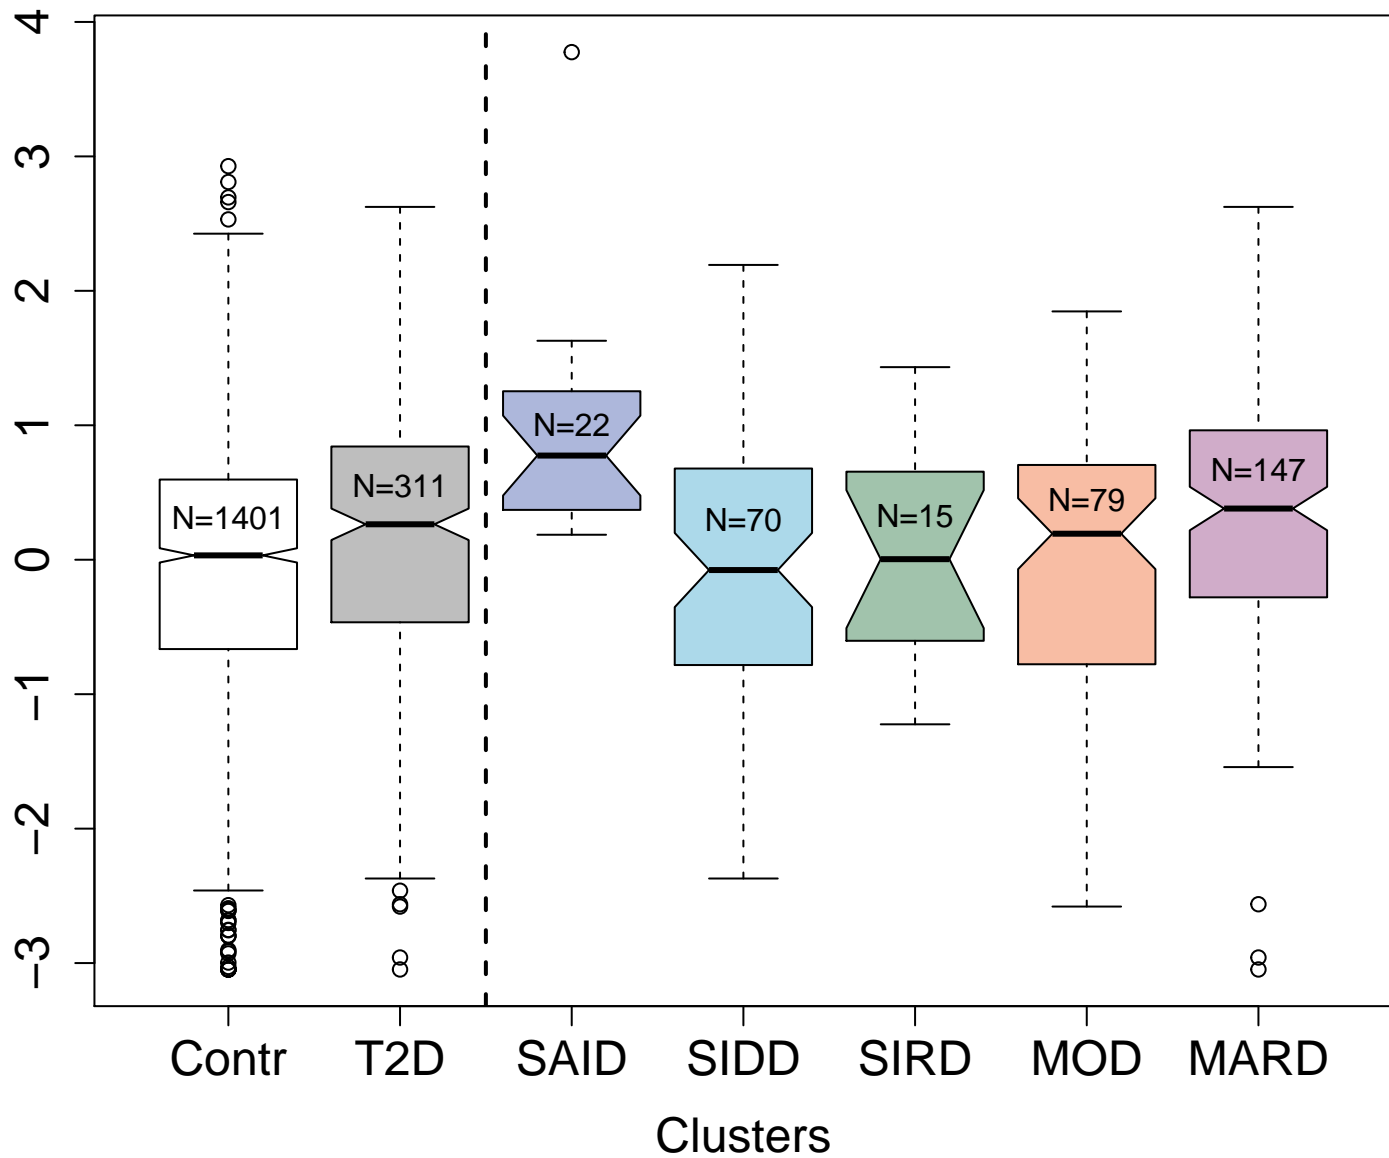

M32397 : 3-hydroxy-2-ethylpropionate

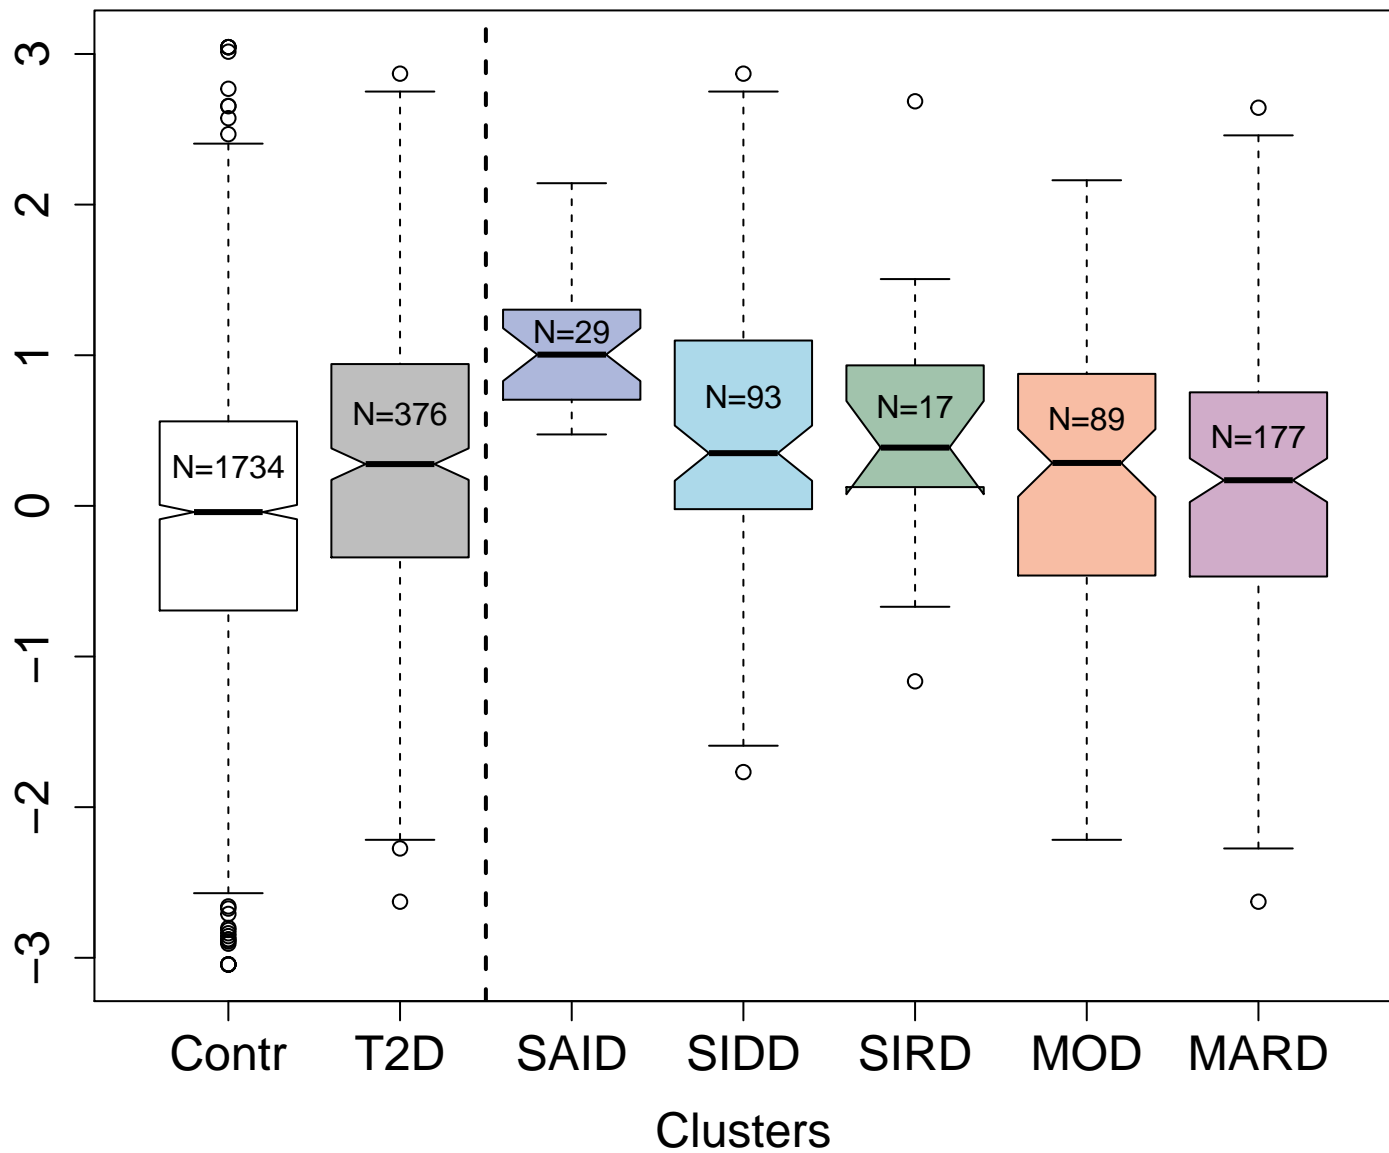

M63152 : ethyl alpha-gucopyranoside

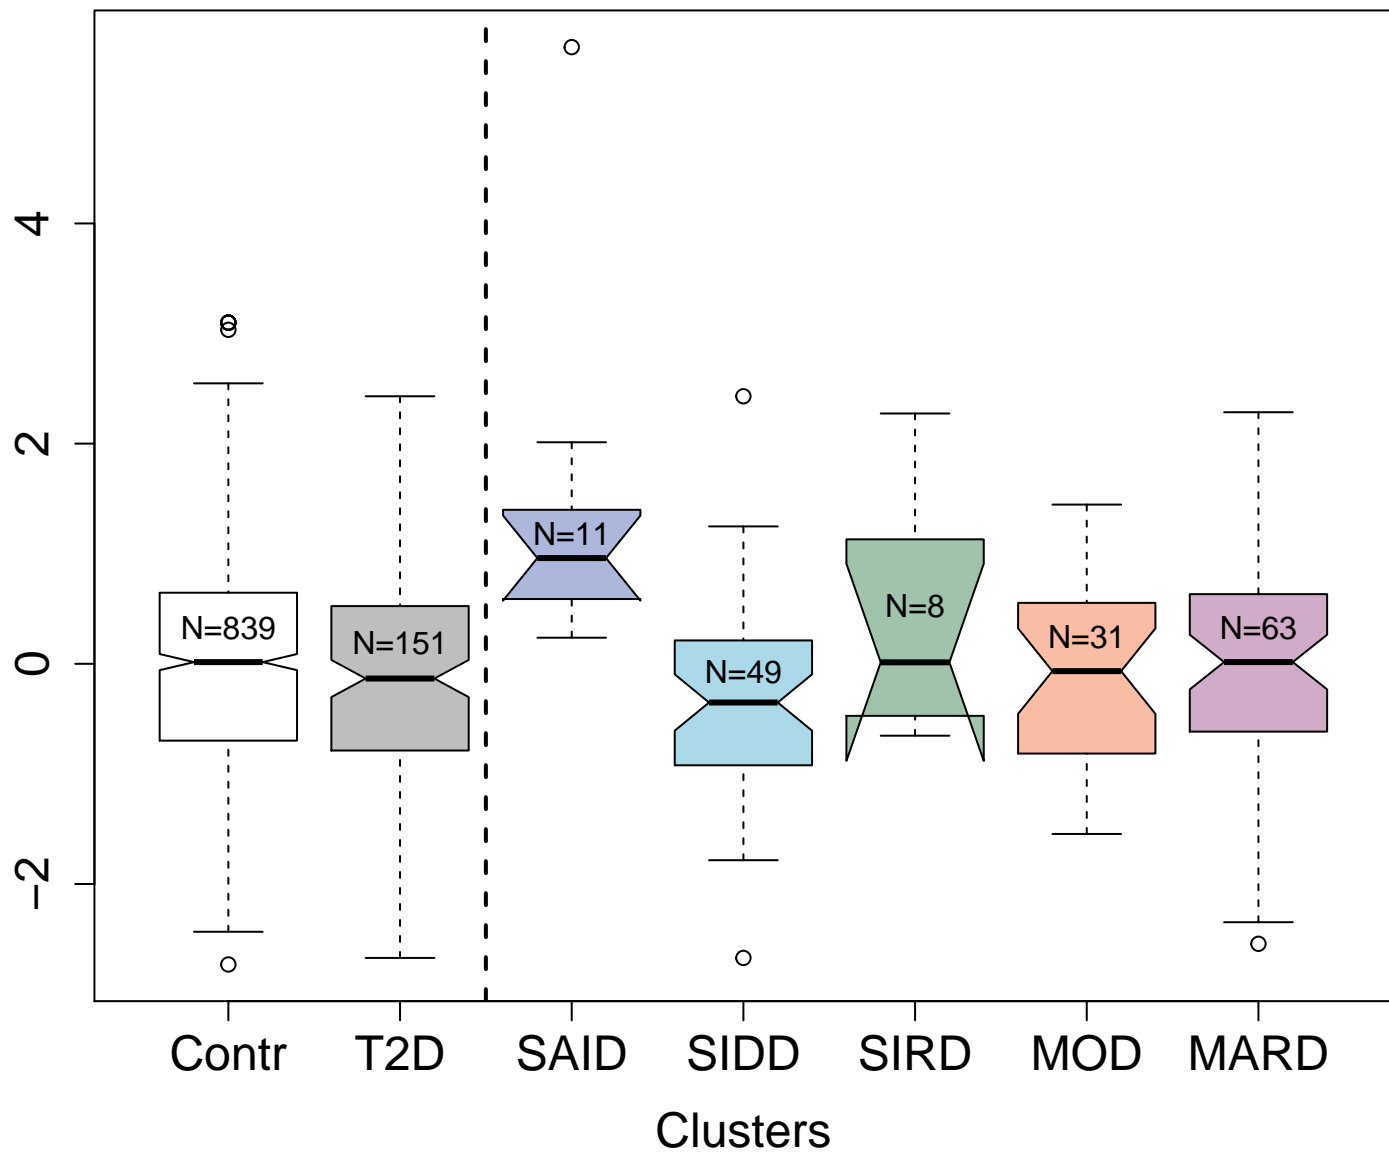

M33937 : alpha-hydroxyisovalerate

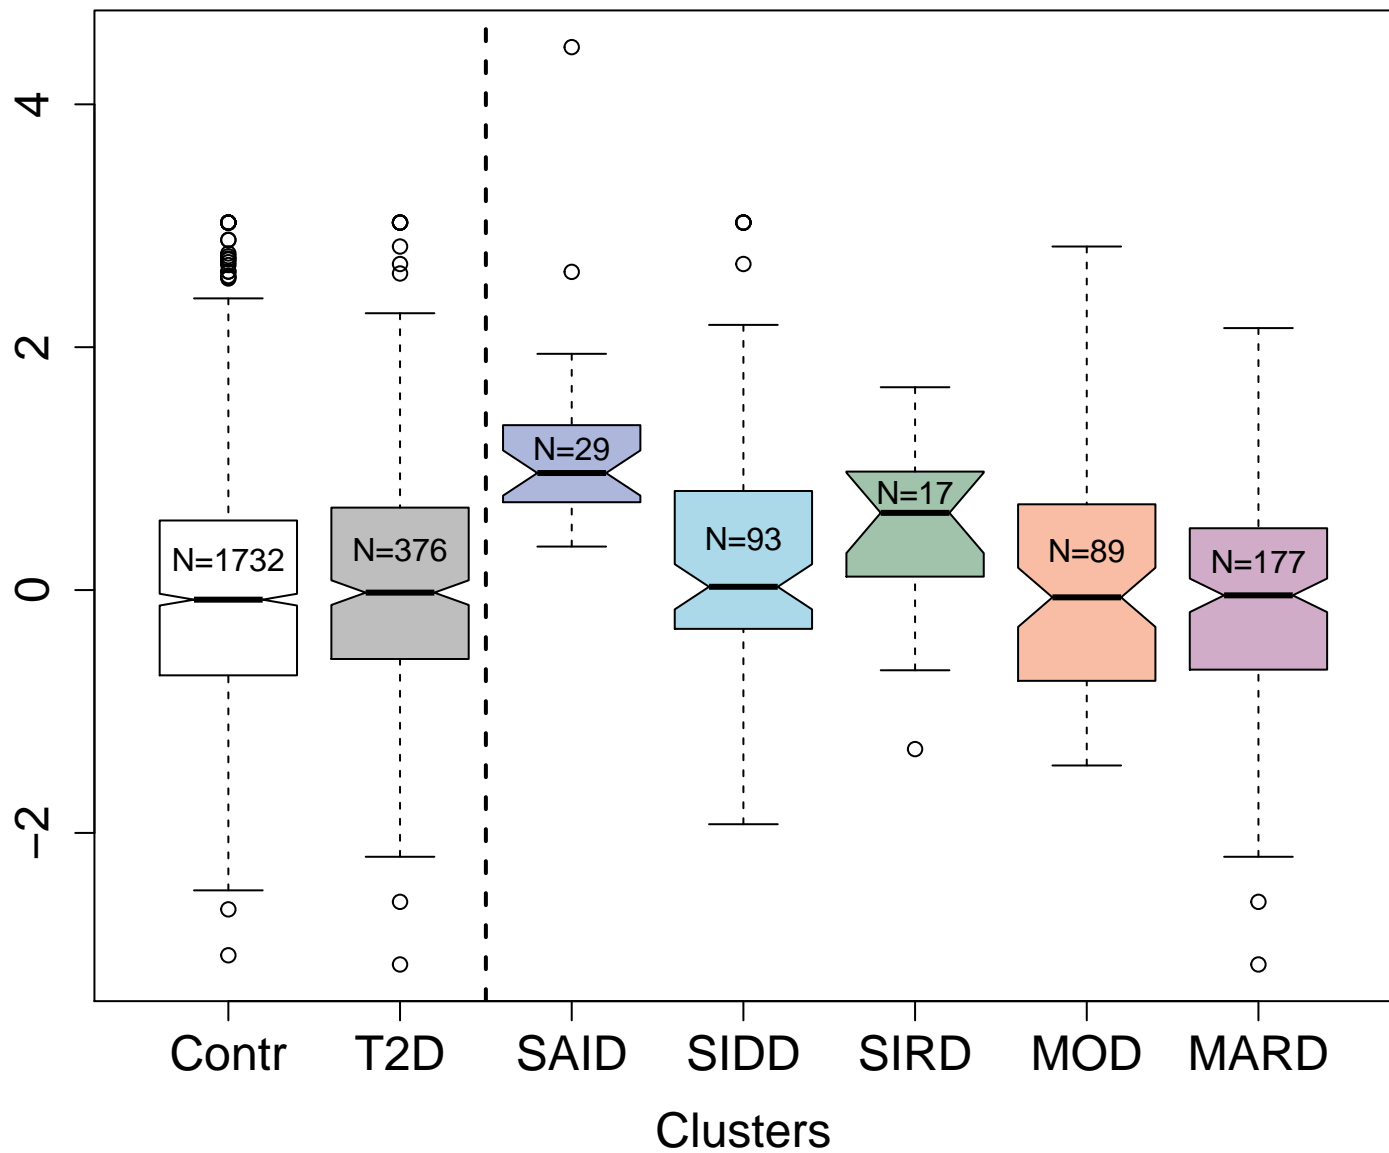



M47153 : sphingomyelin (d18:1/24:1, d18:2/24:0)\*

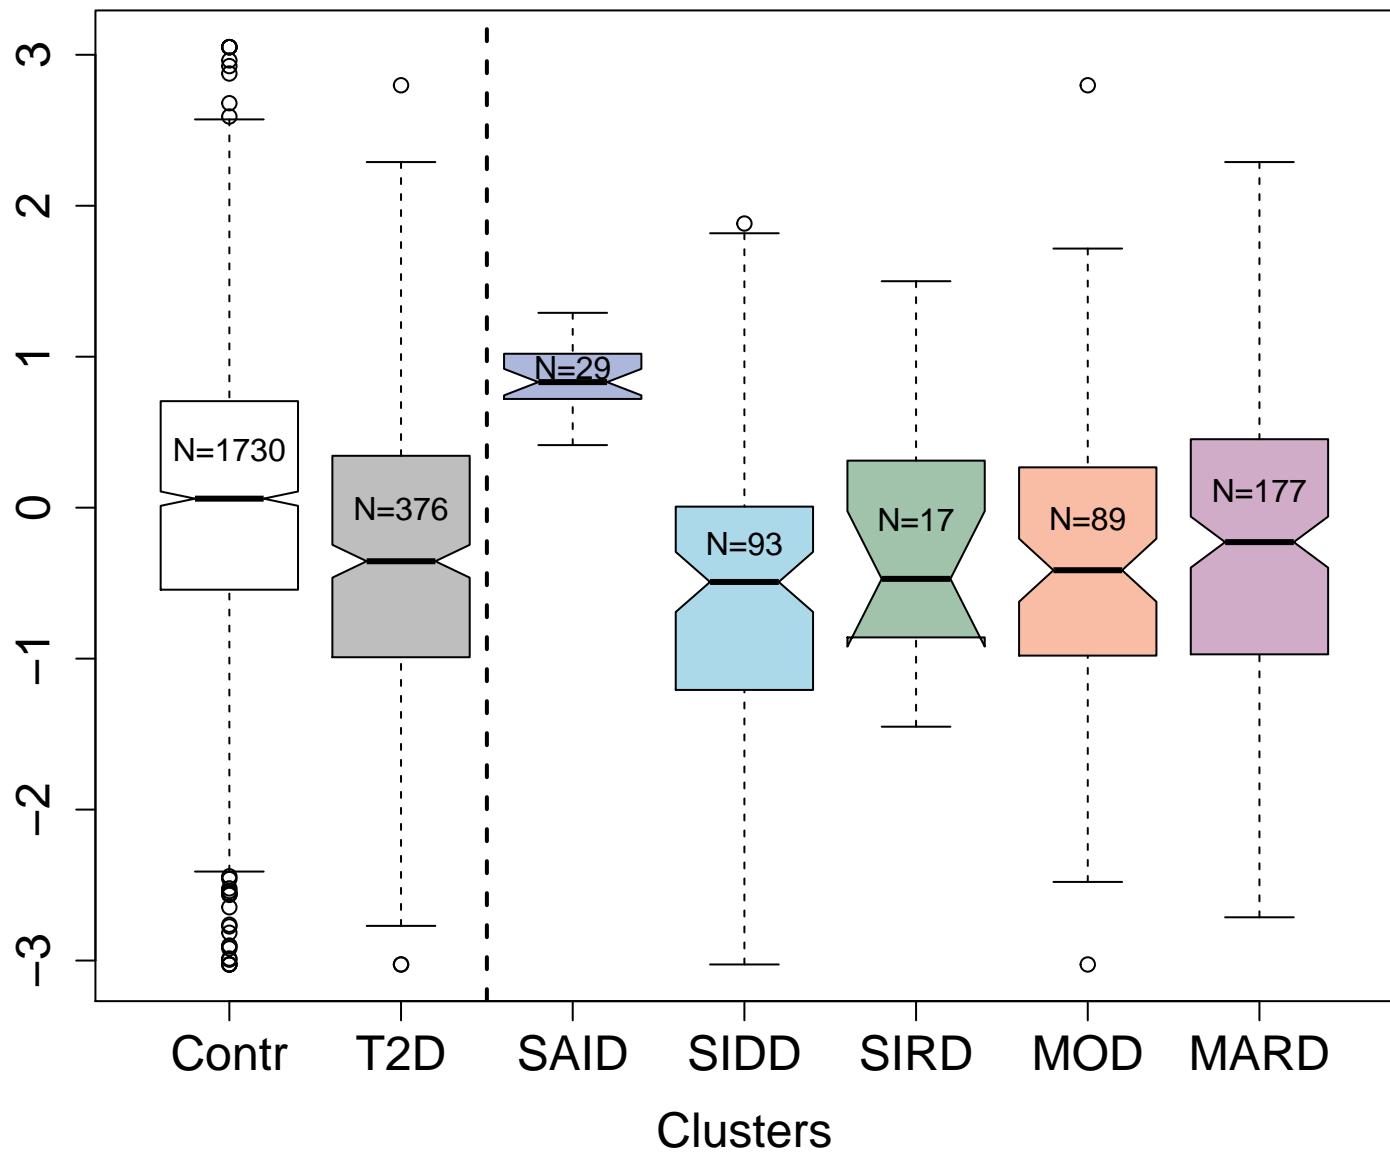

M43488 : N-acetylcarnosine

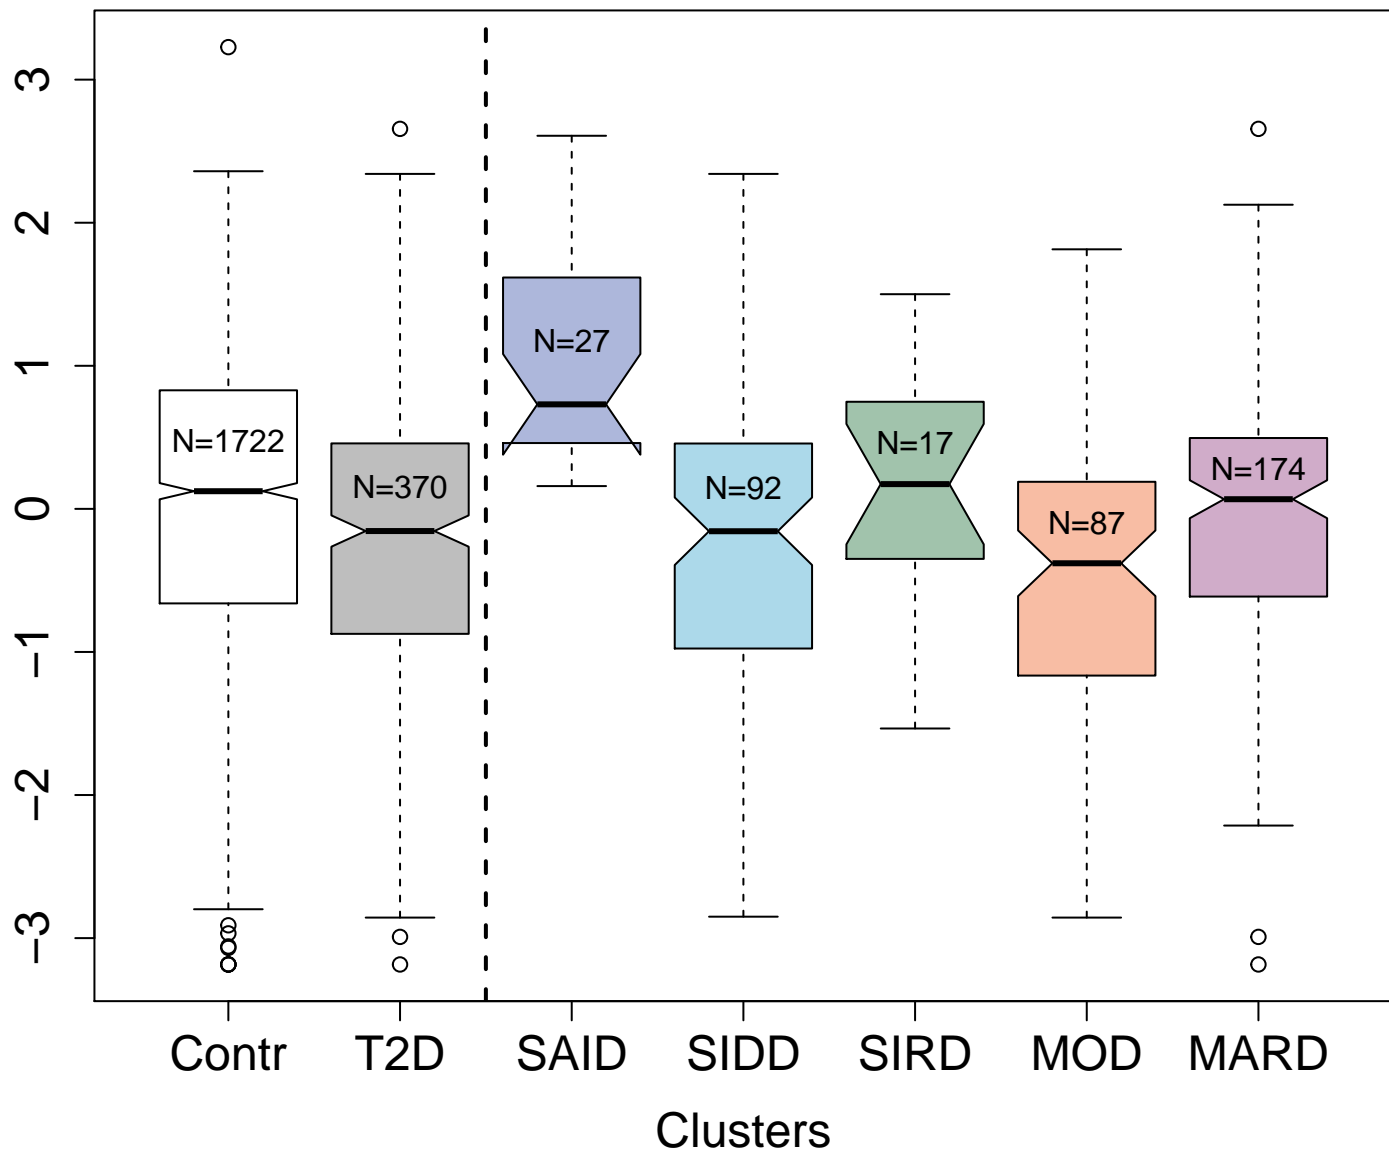

M2342 : serotonin

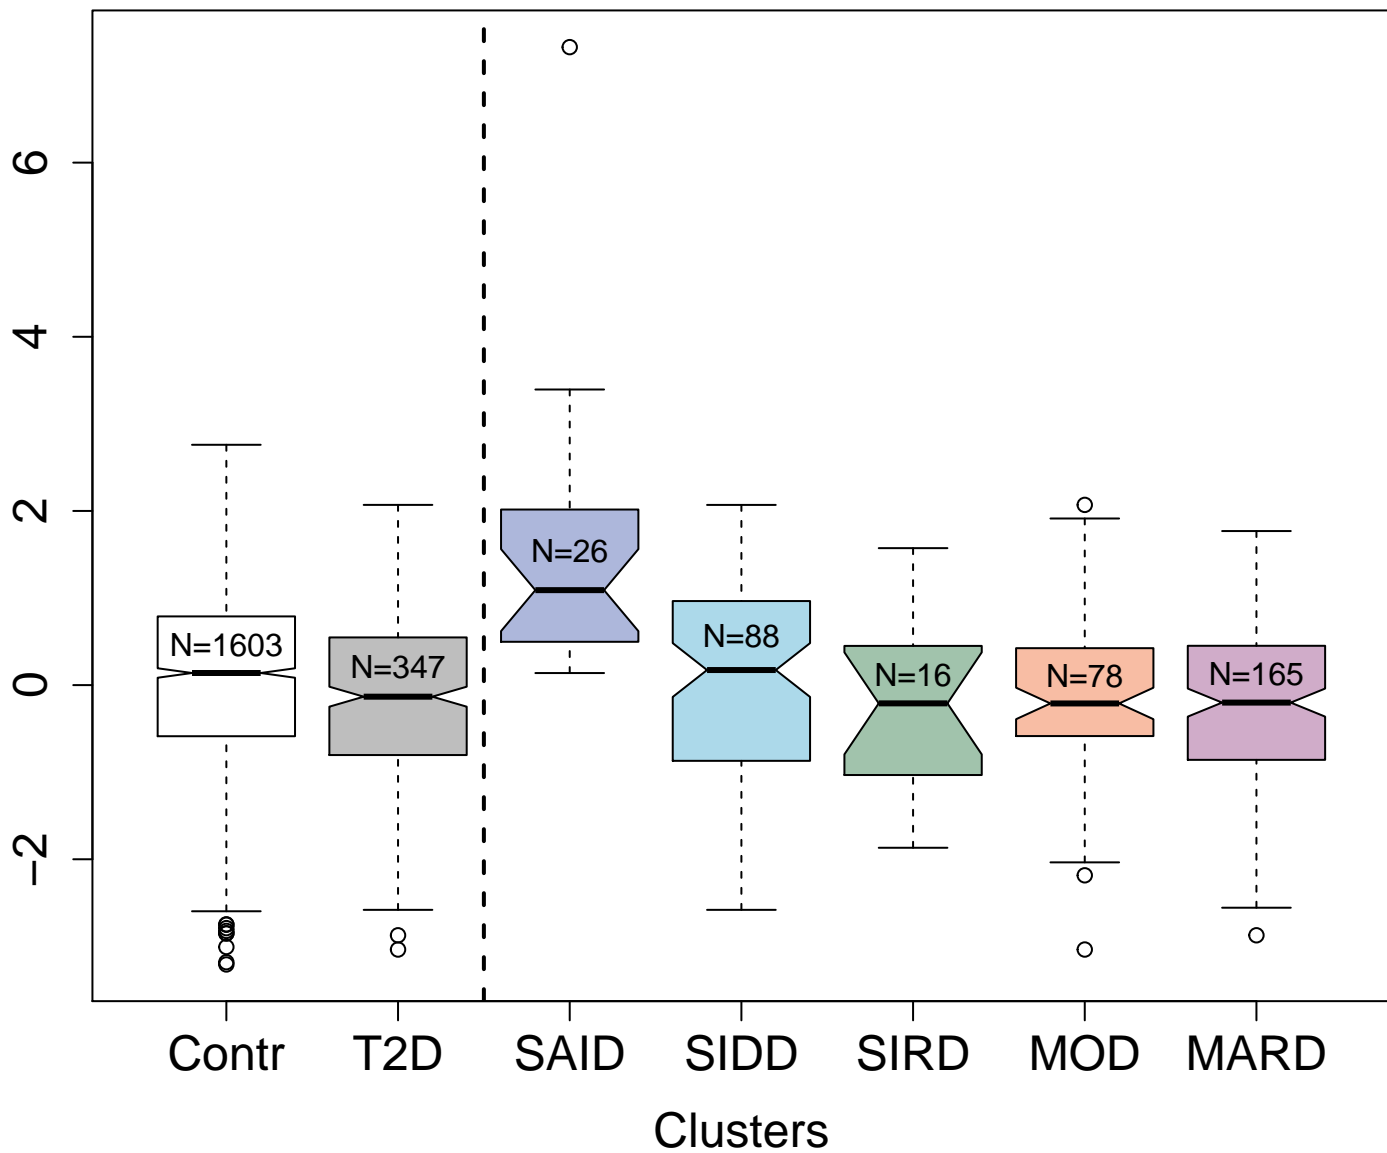

M33959 : N-acetyltryptophan

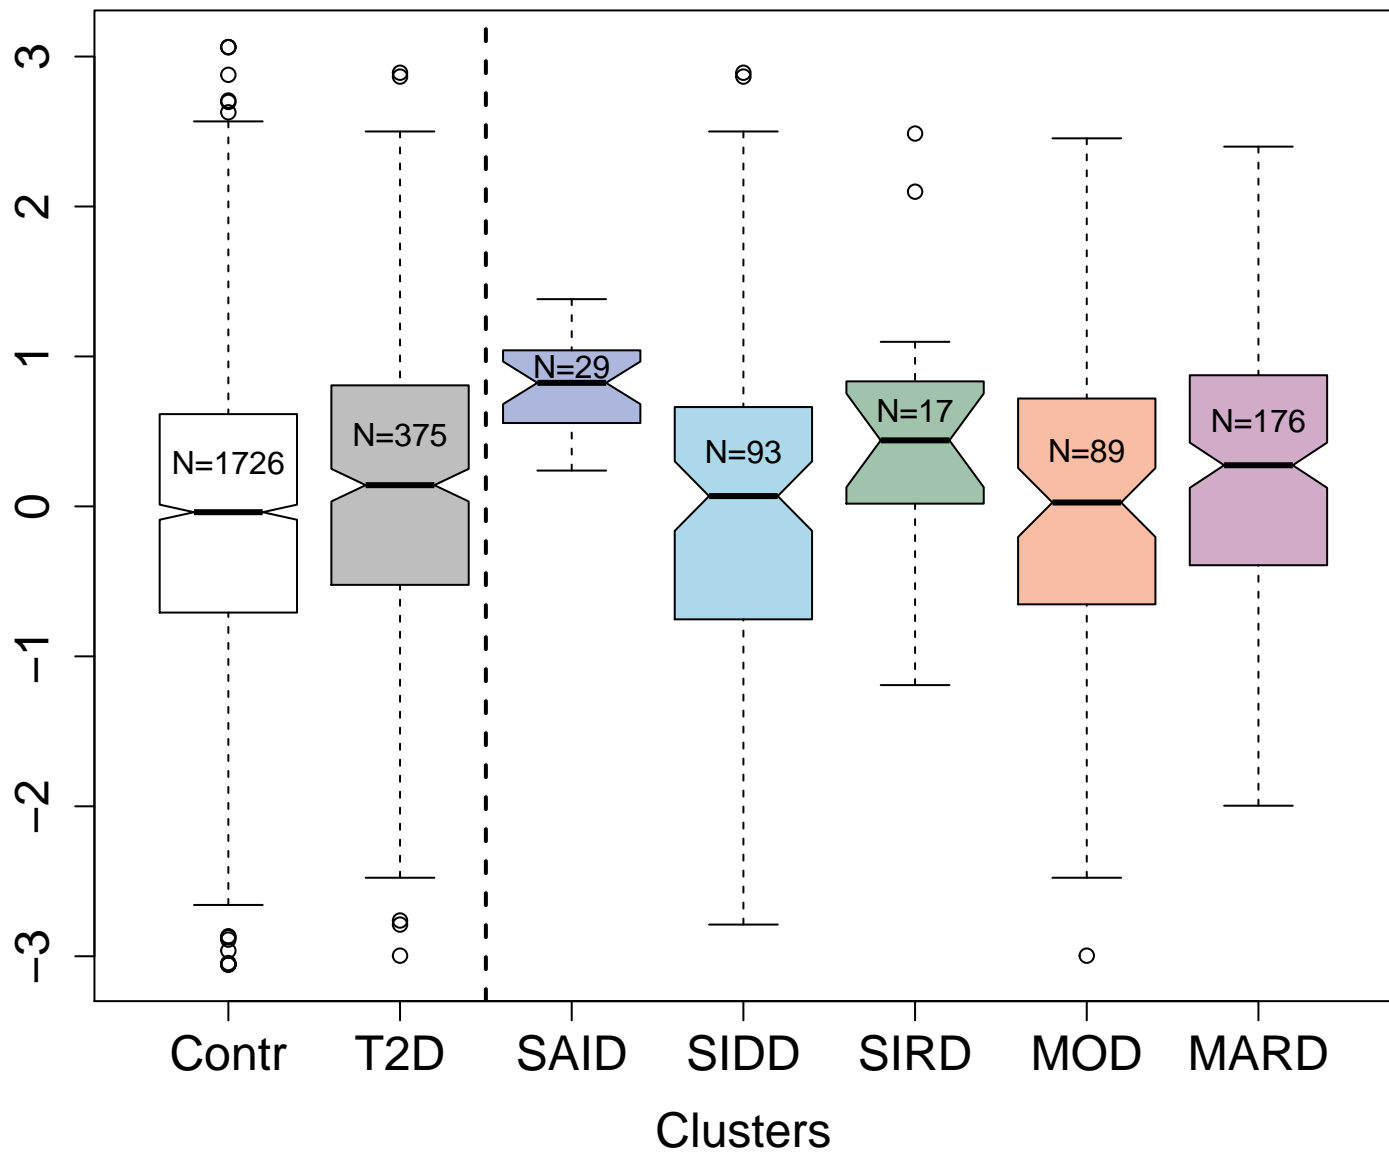

M33955 : 1-palmitoyl-GPC (16:0)

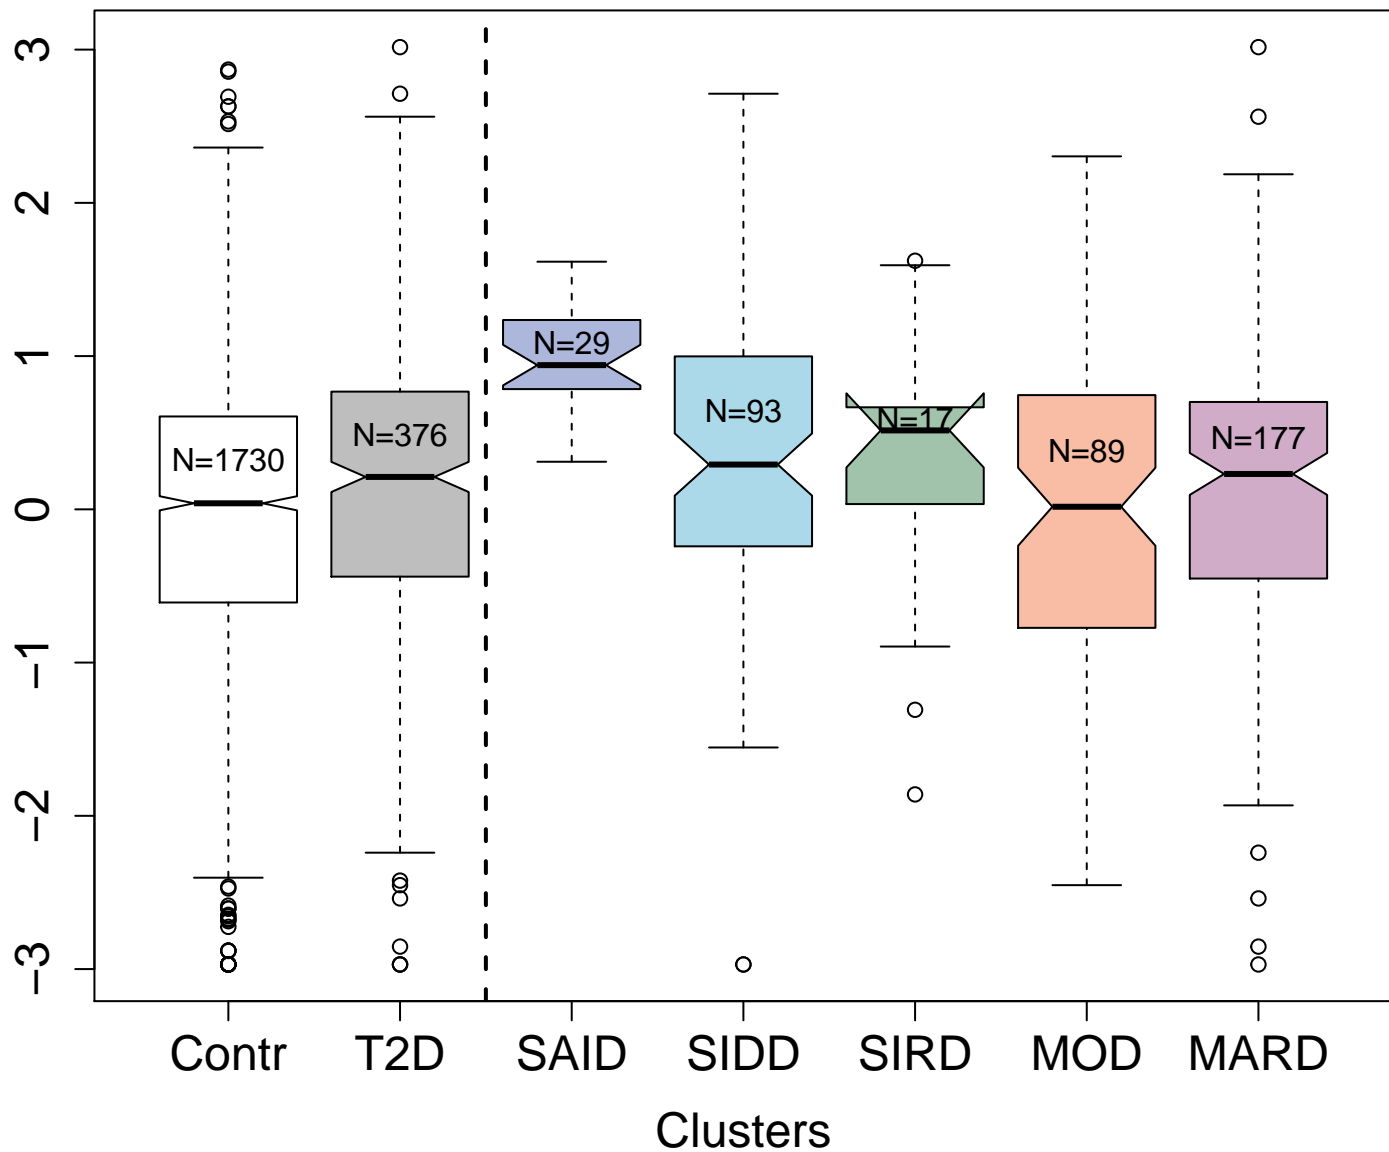

M32807 : taurochenolate sulfate\*

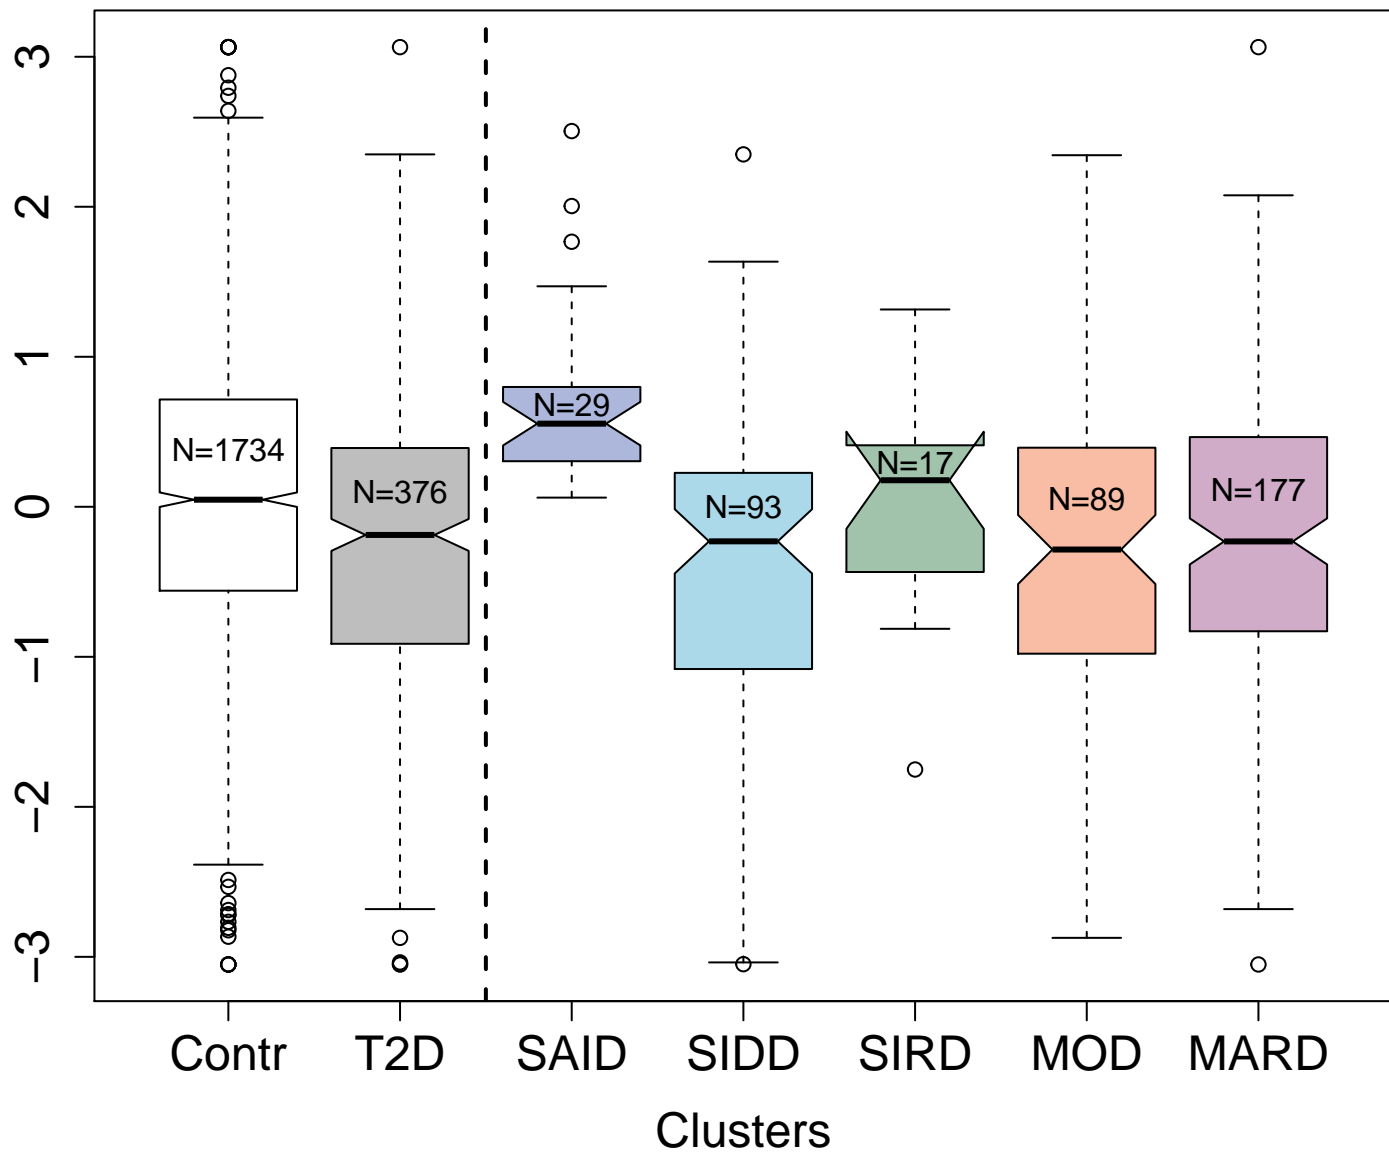

M42382 : S-adenosylhomocysteine (SAH)

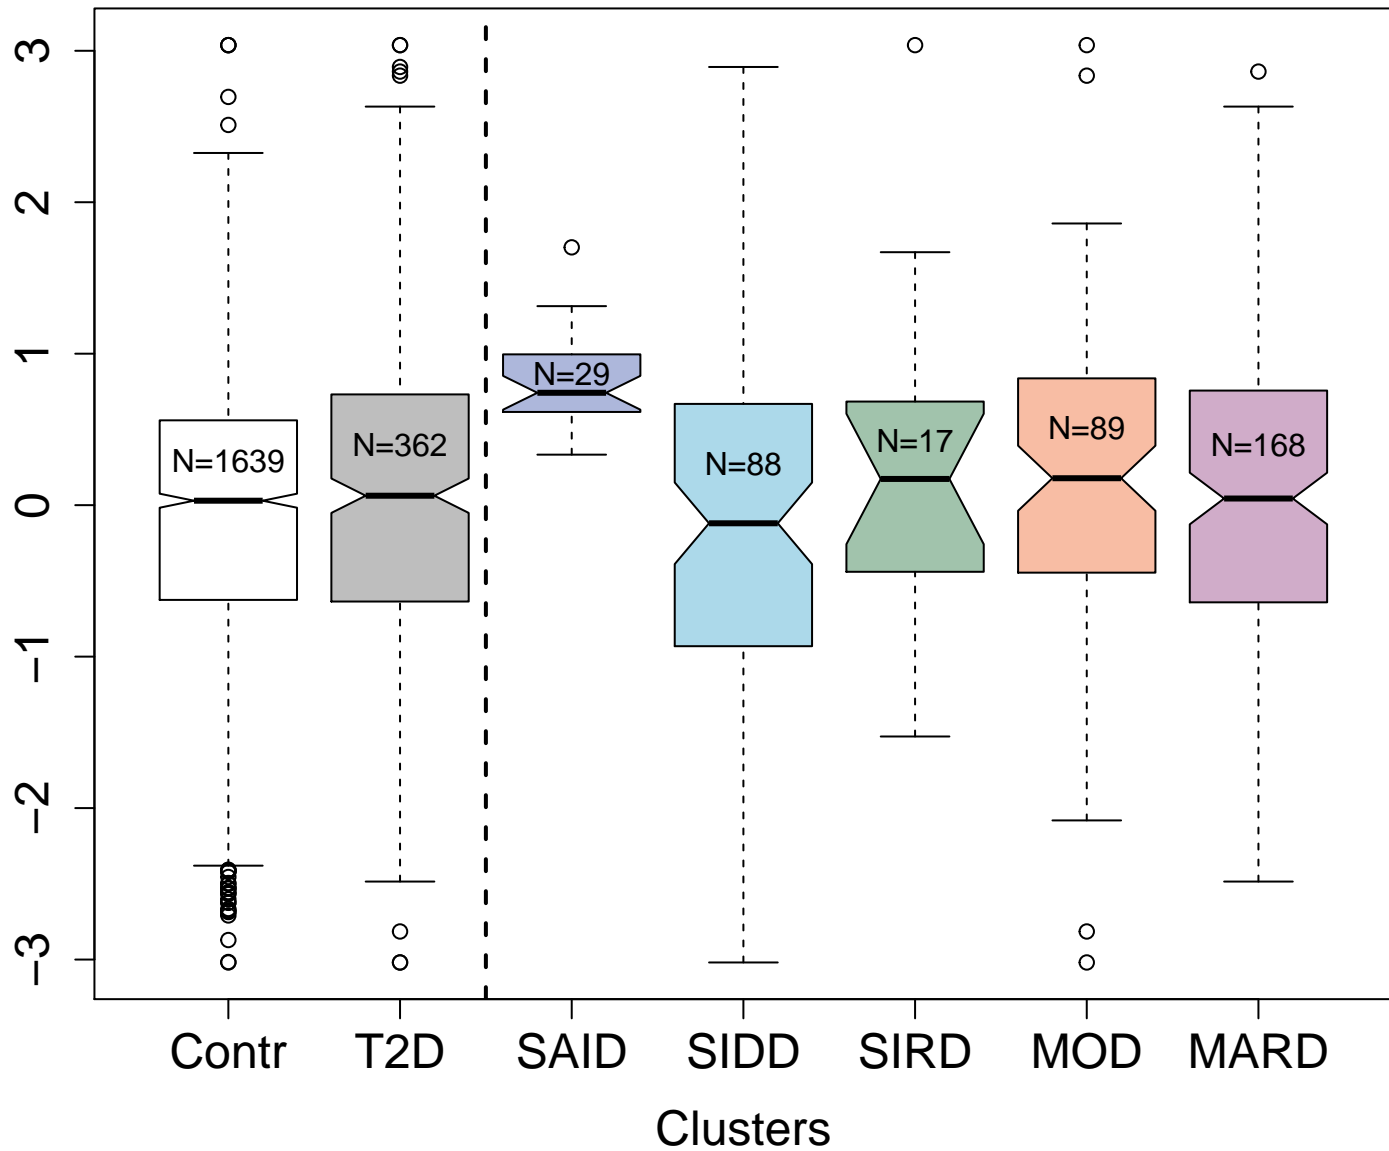

M52533 : X - 24337

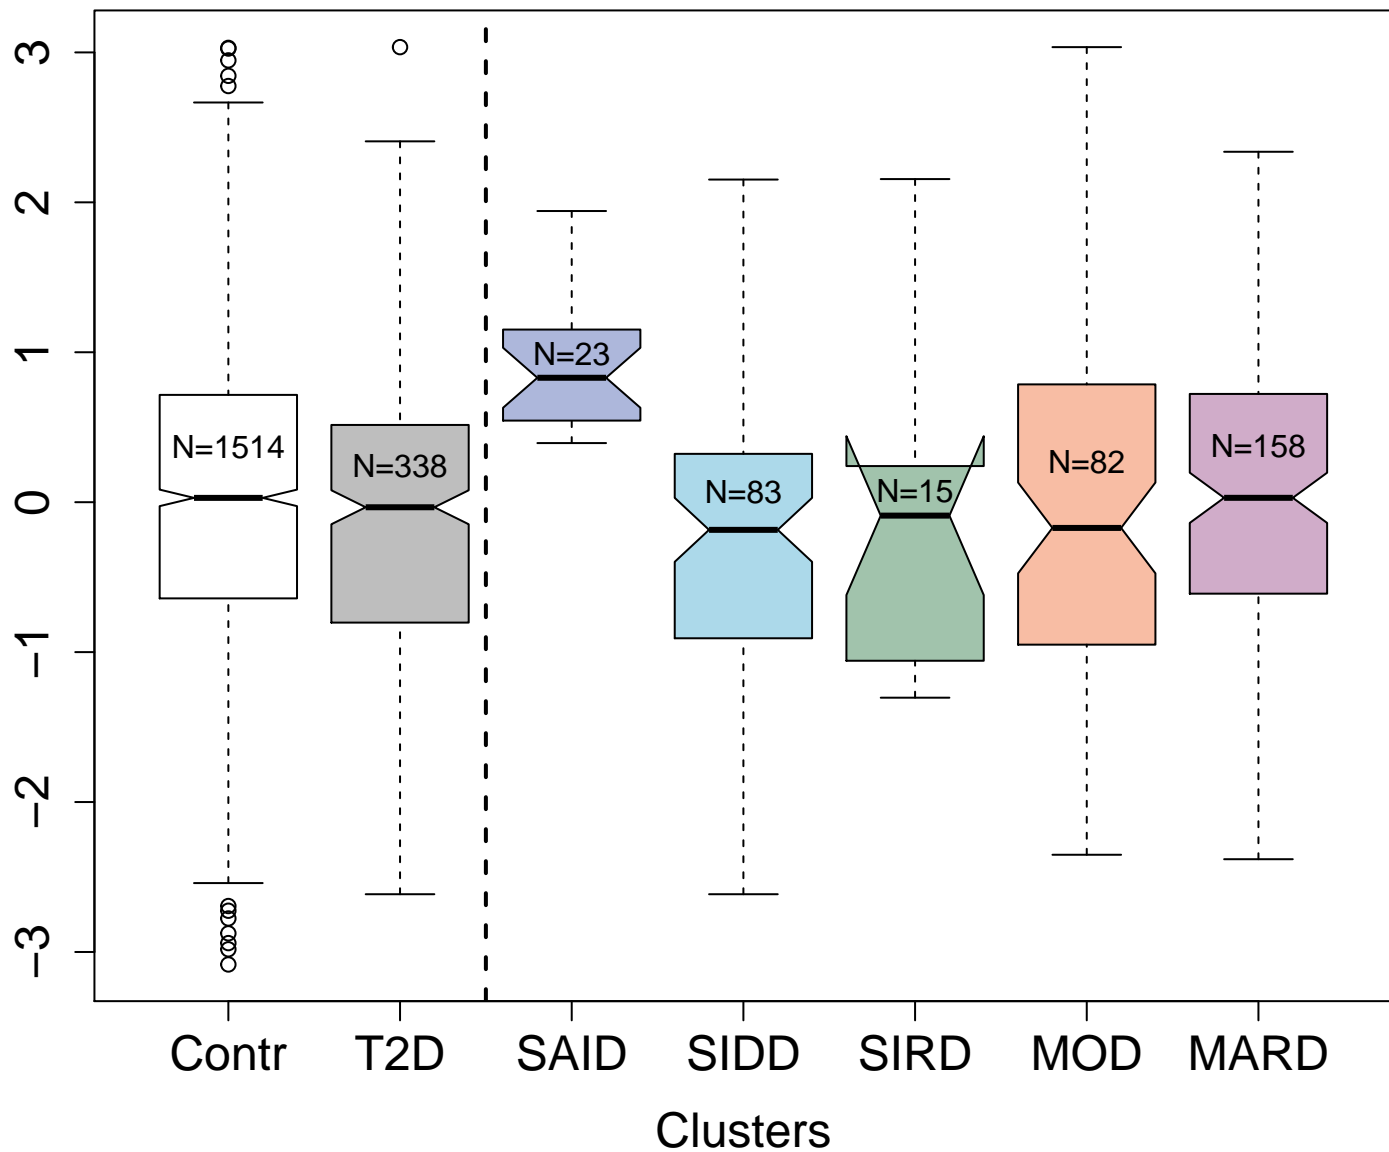



M512 : asparagine

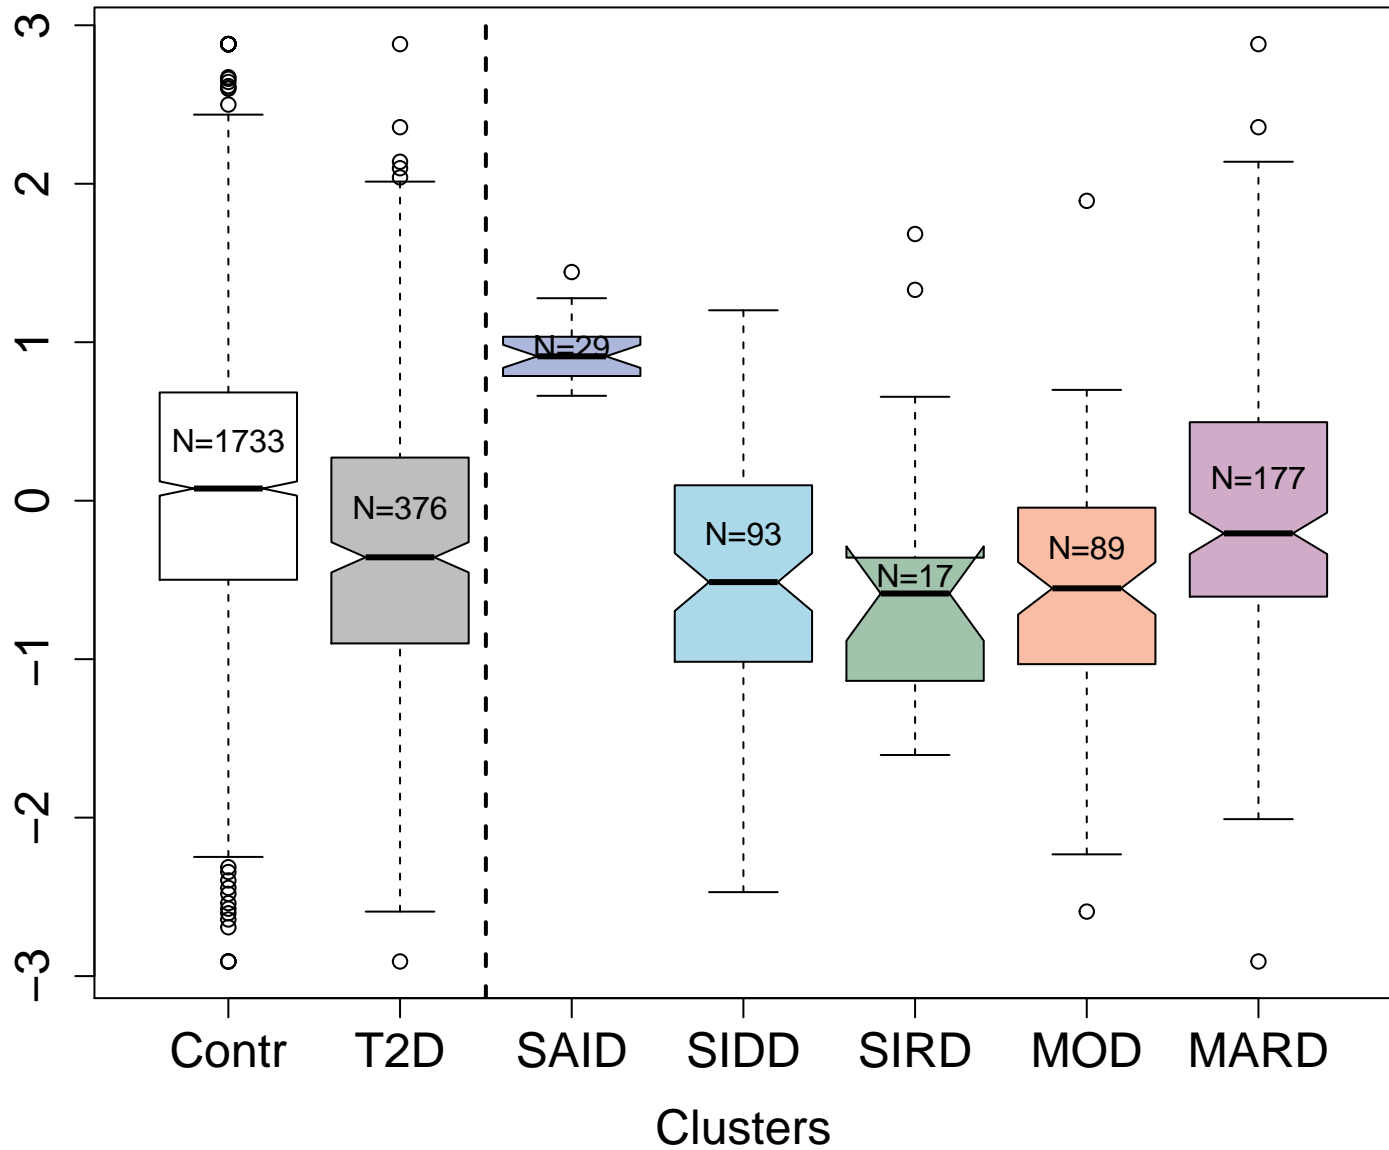

M35637 : cysteinylglycine

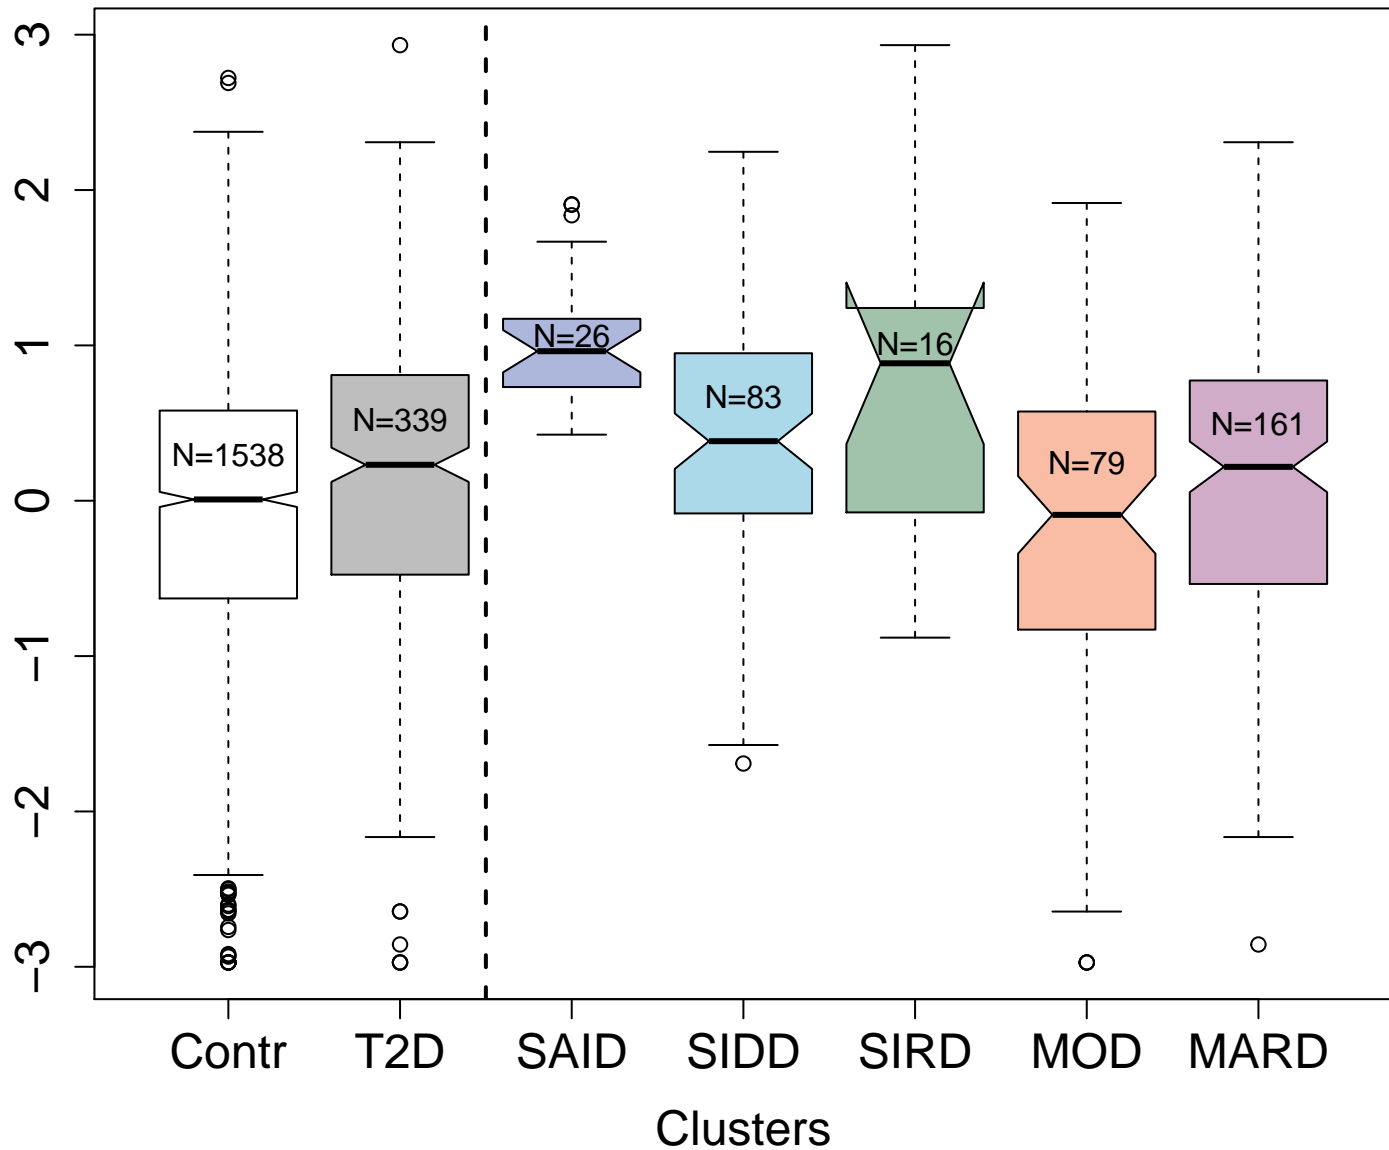

M47687 : X - 12100

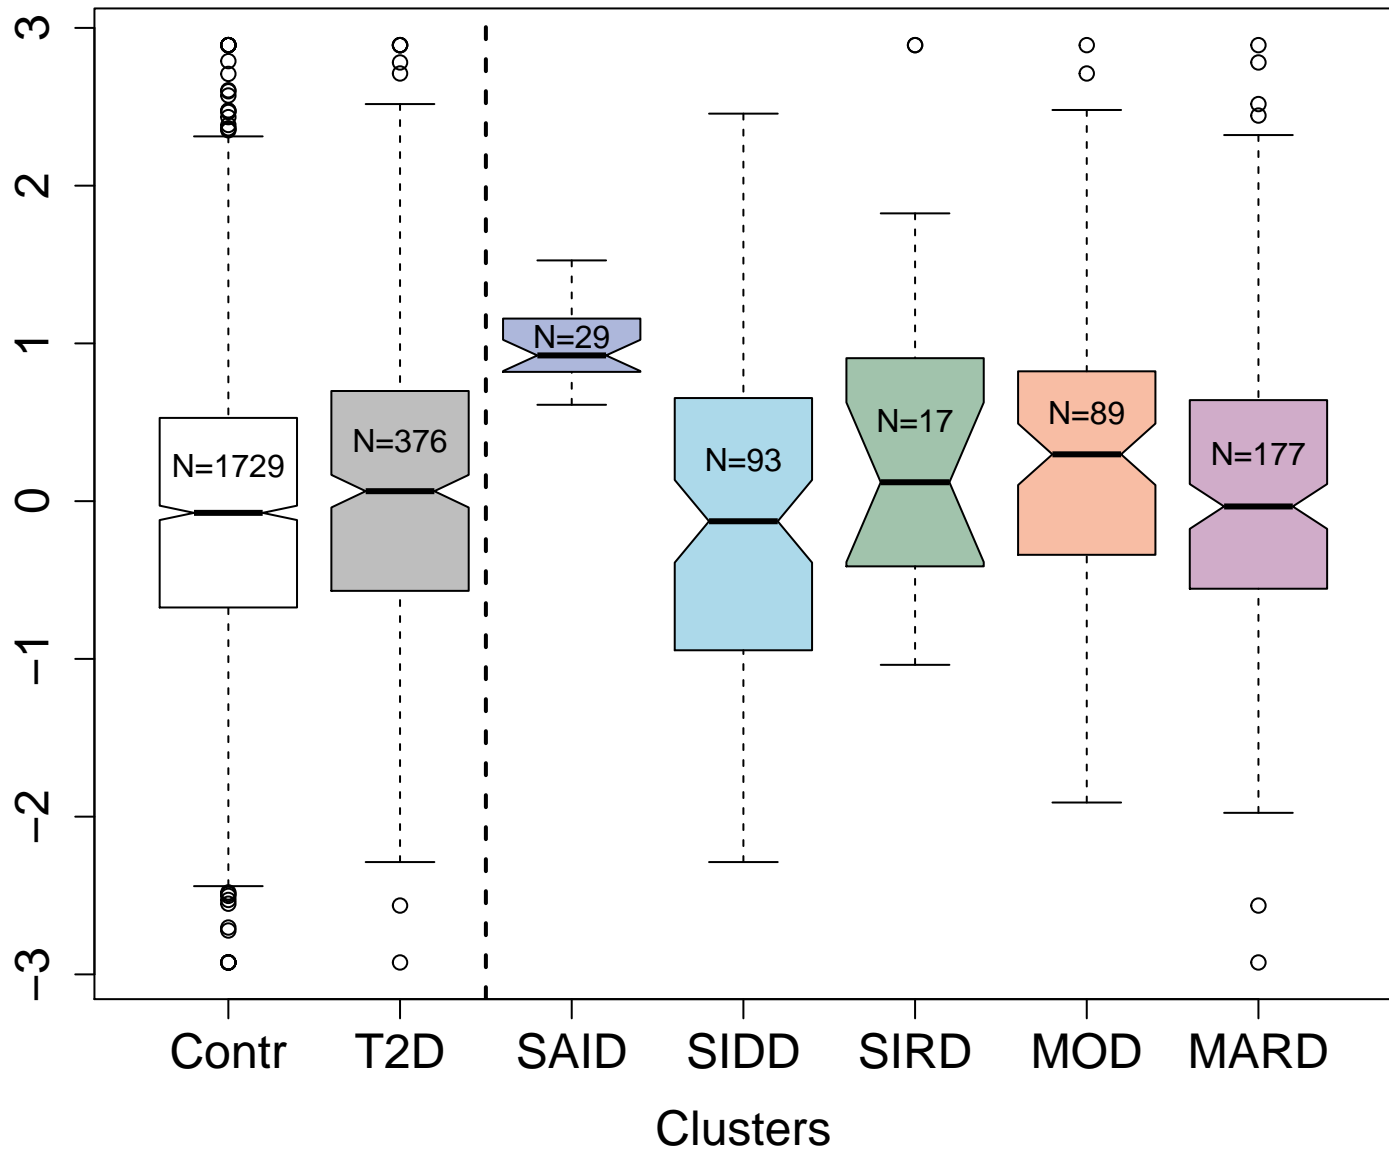

M63339 : (S)-a-amino-omega-caprolactam

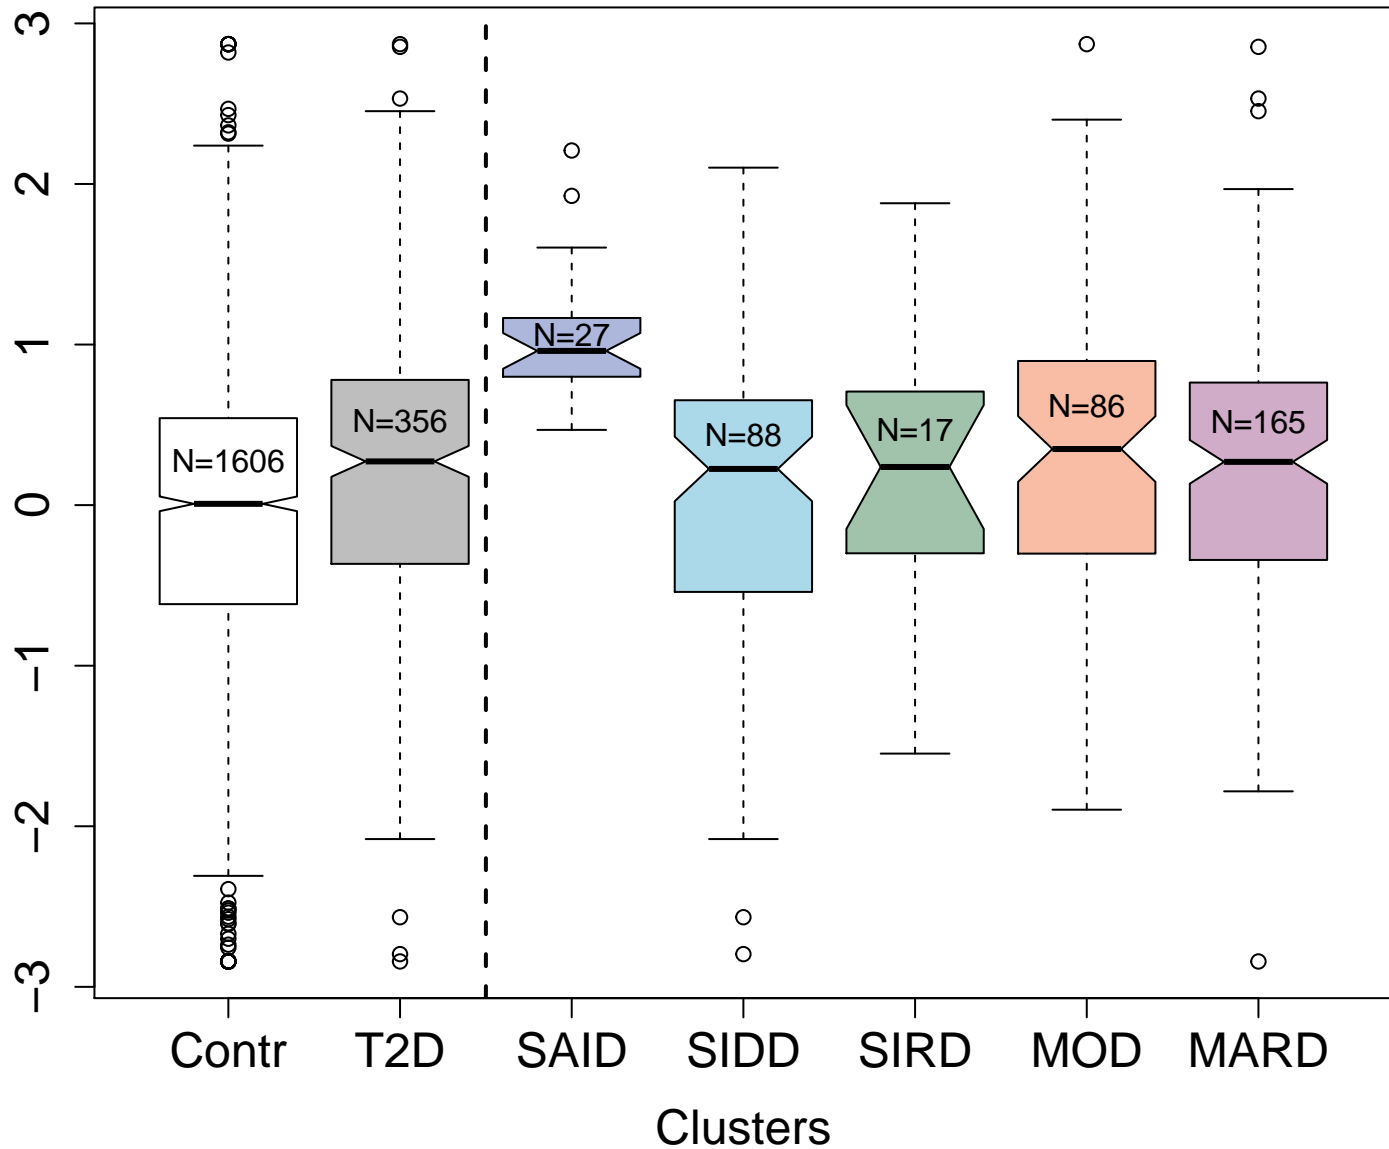

M27665 : 1-methylnicotinamide

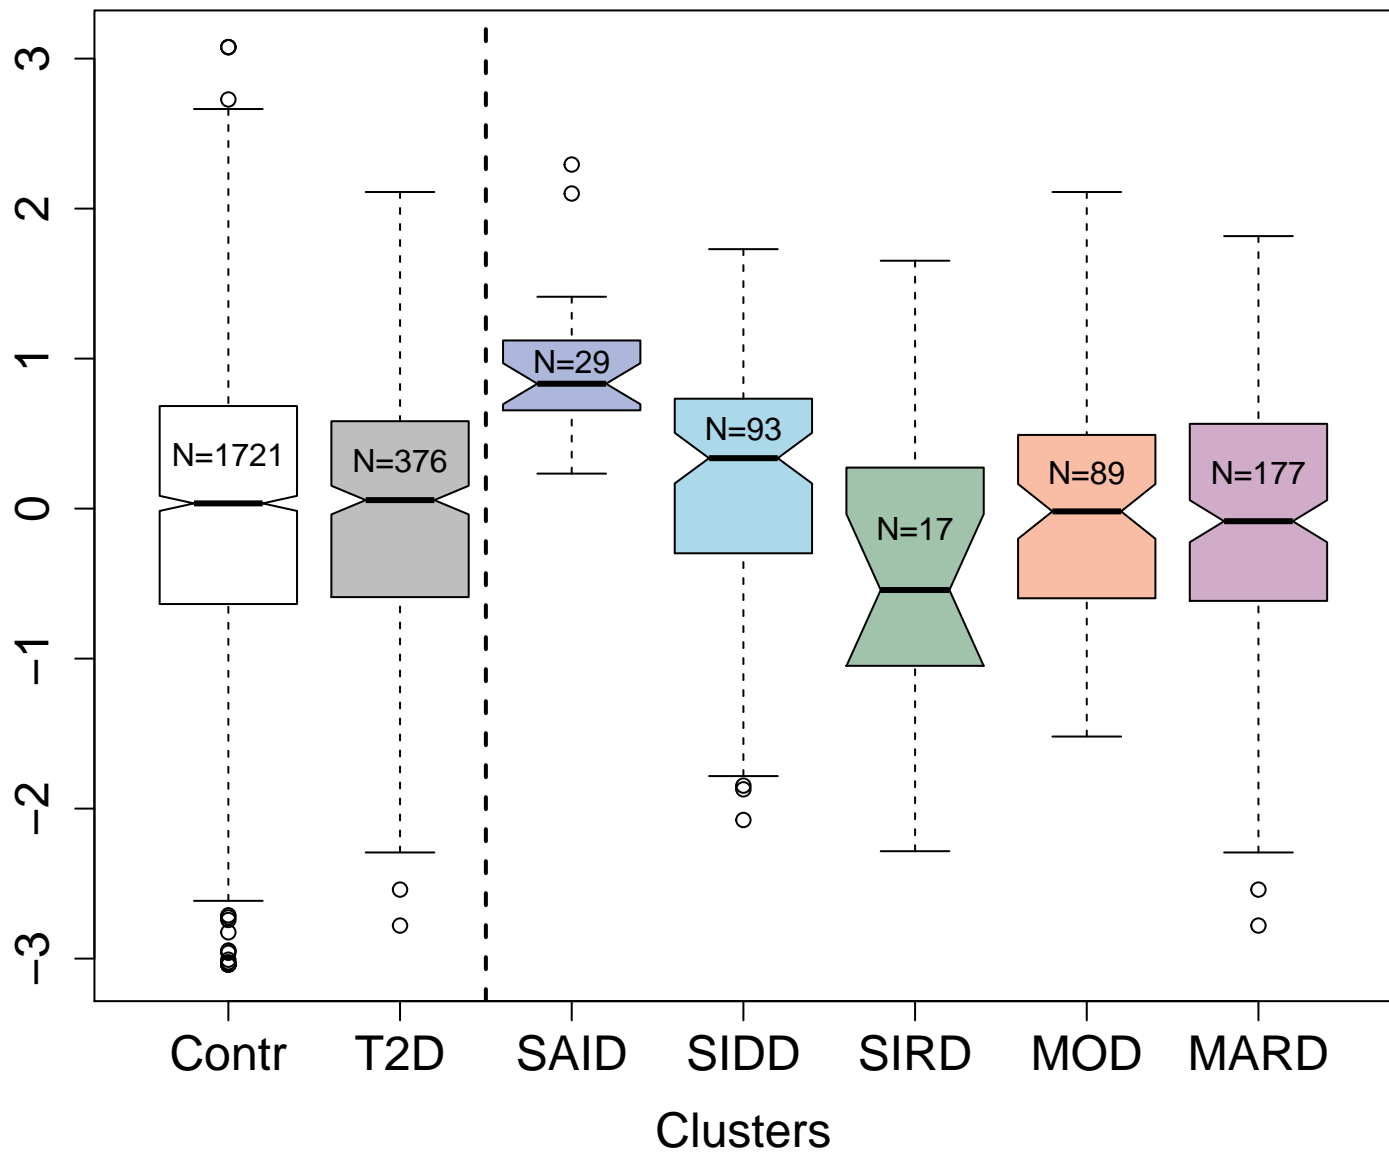

M46173 : aconitate [cis or trans]

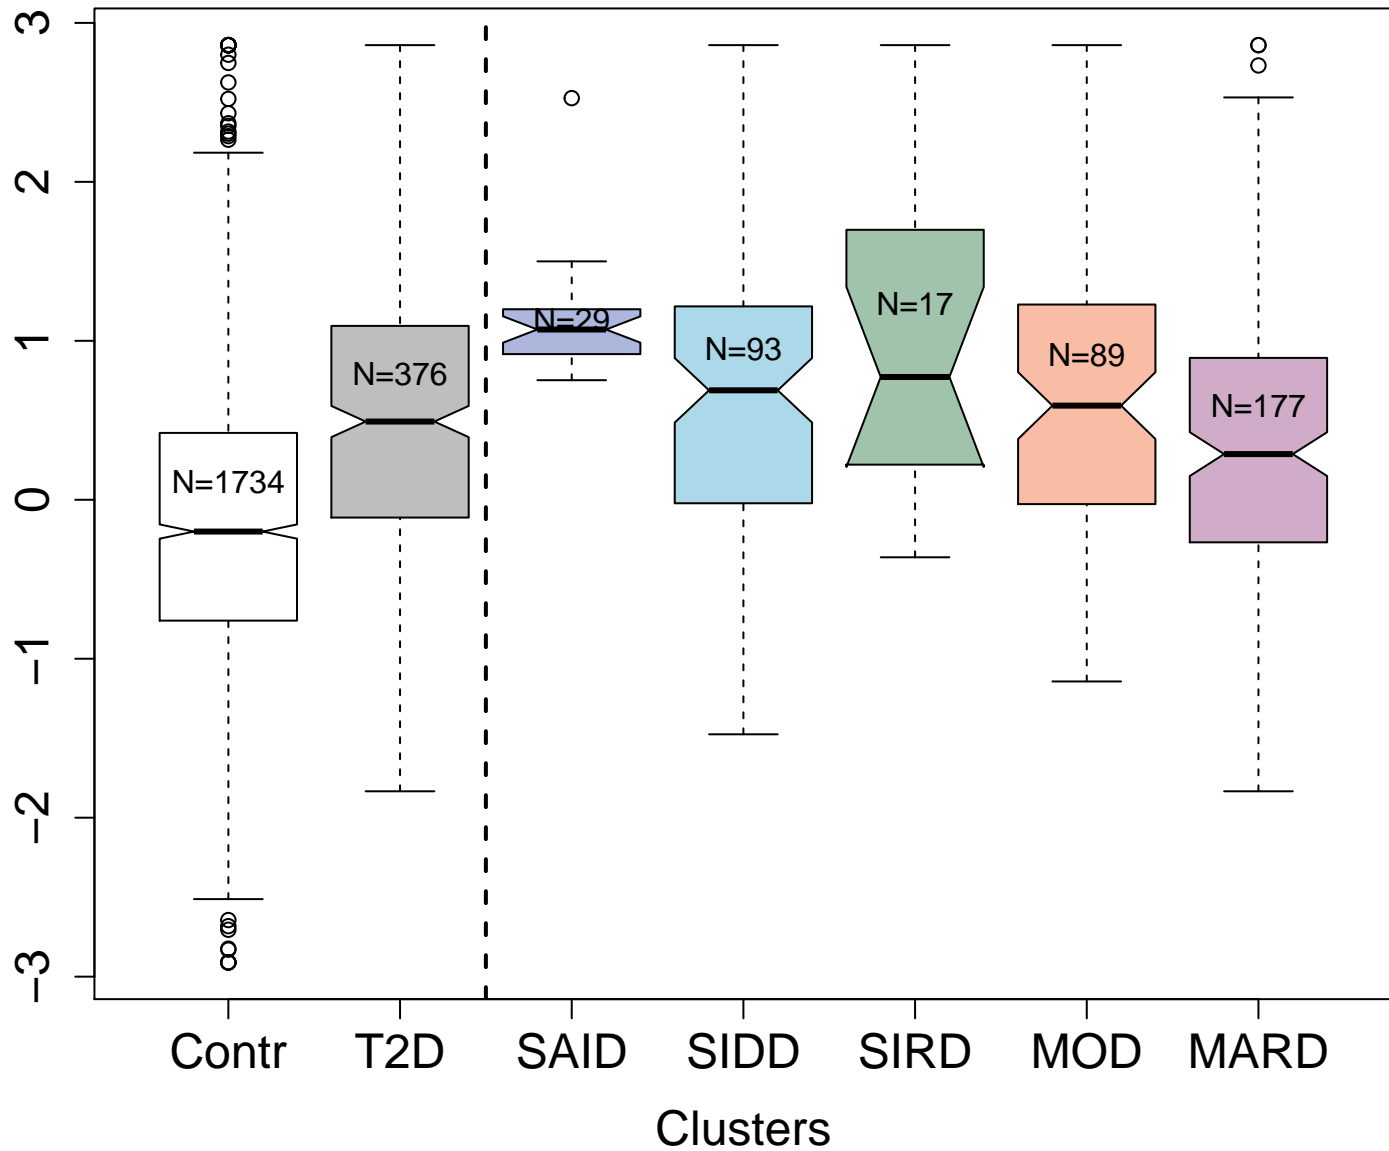

M36738 : gamma-glutamylglutamate

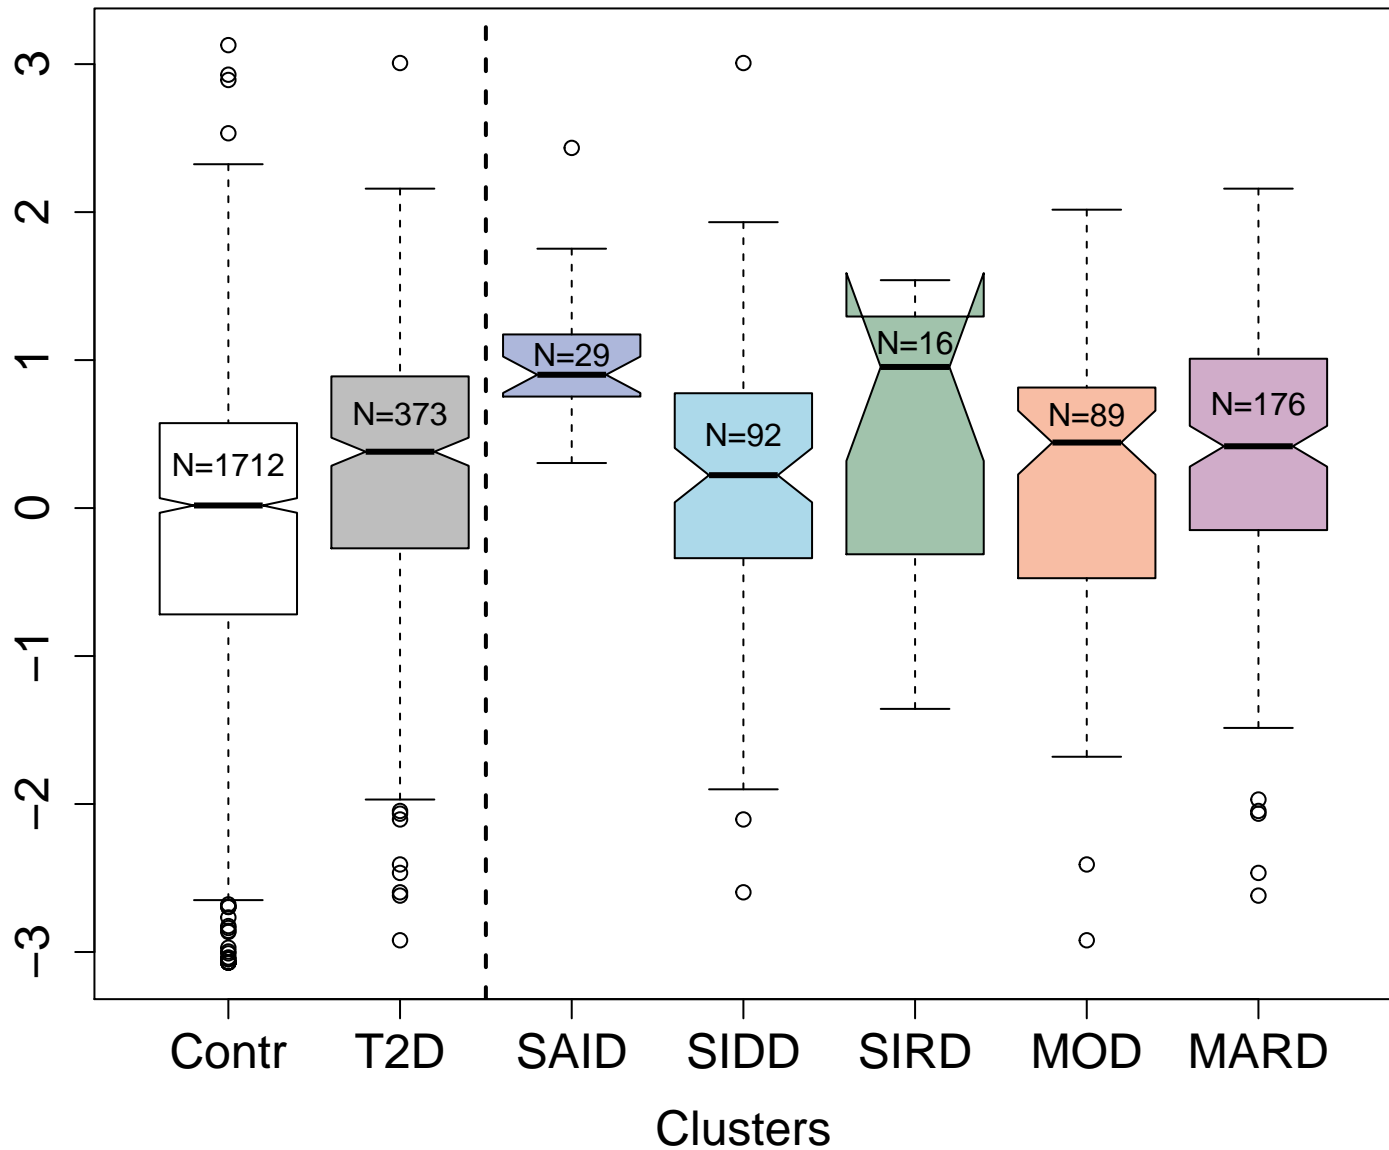

M62873 : cis-4-decenoate (10:1n6)\*

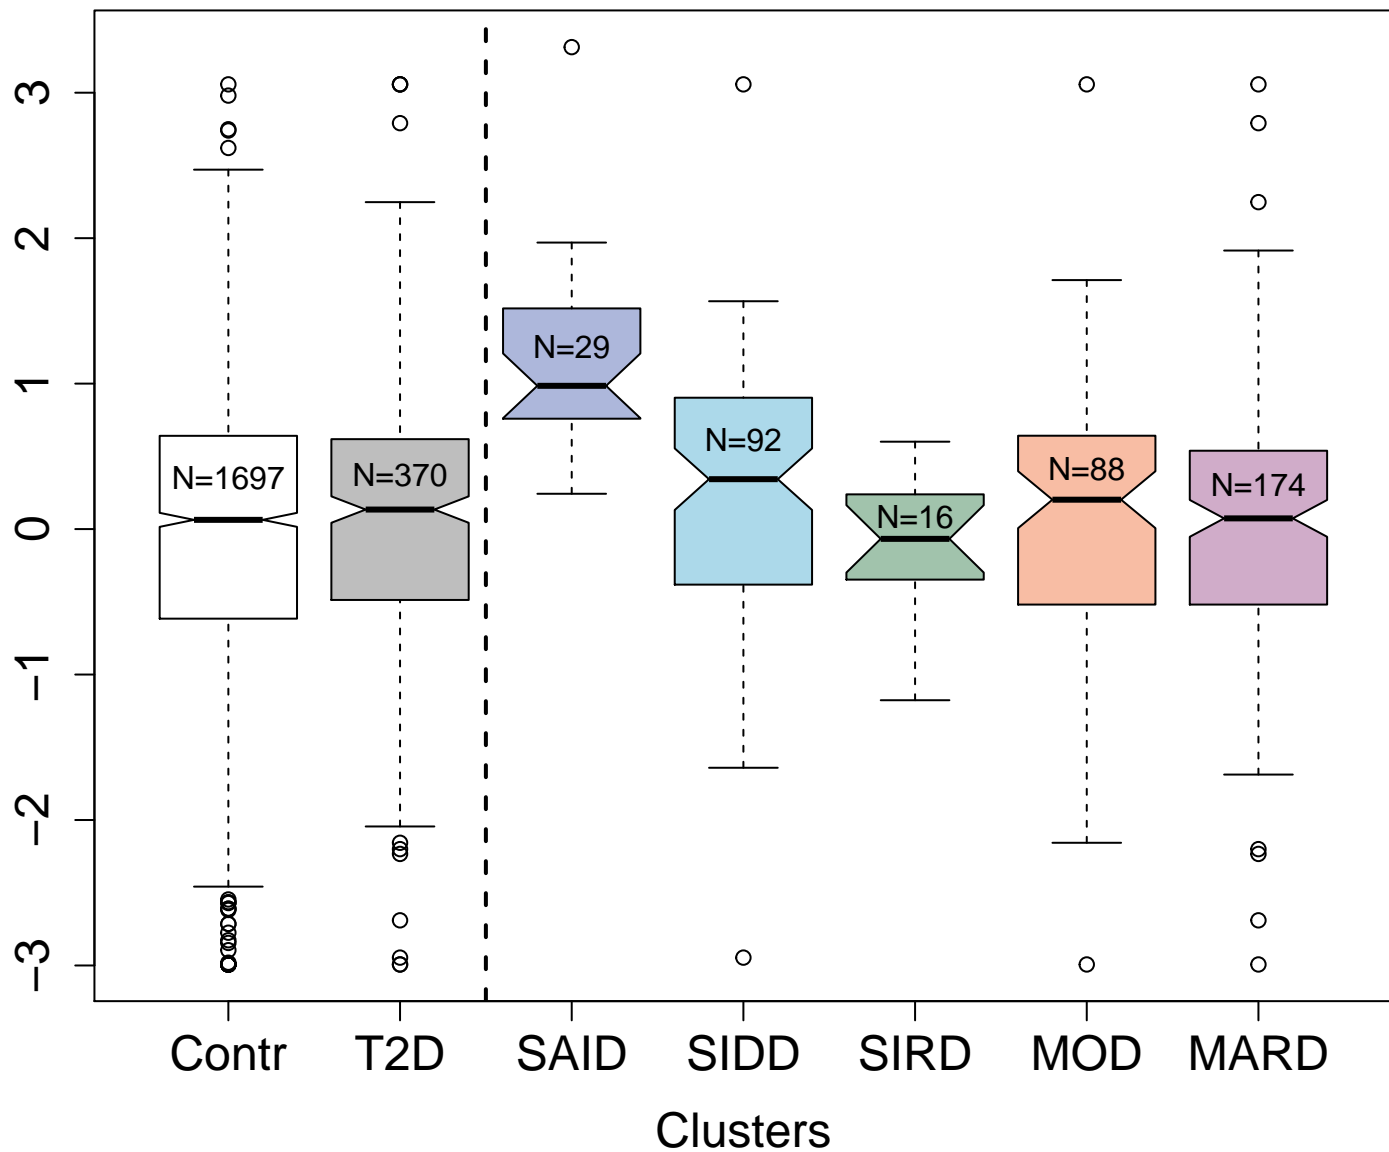



M62733 : 3-hydroxyphenylacetoylglutamine

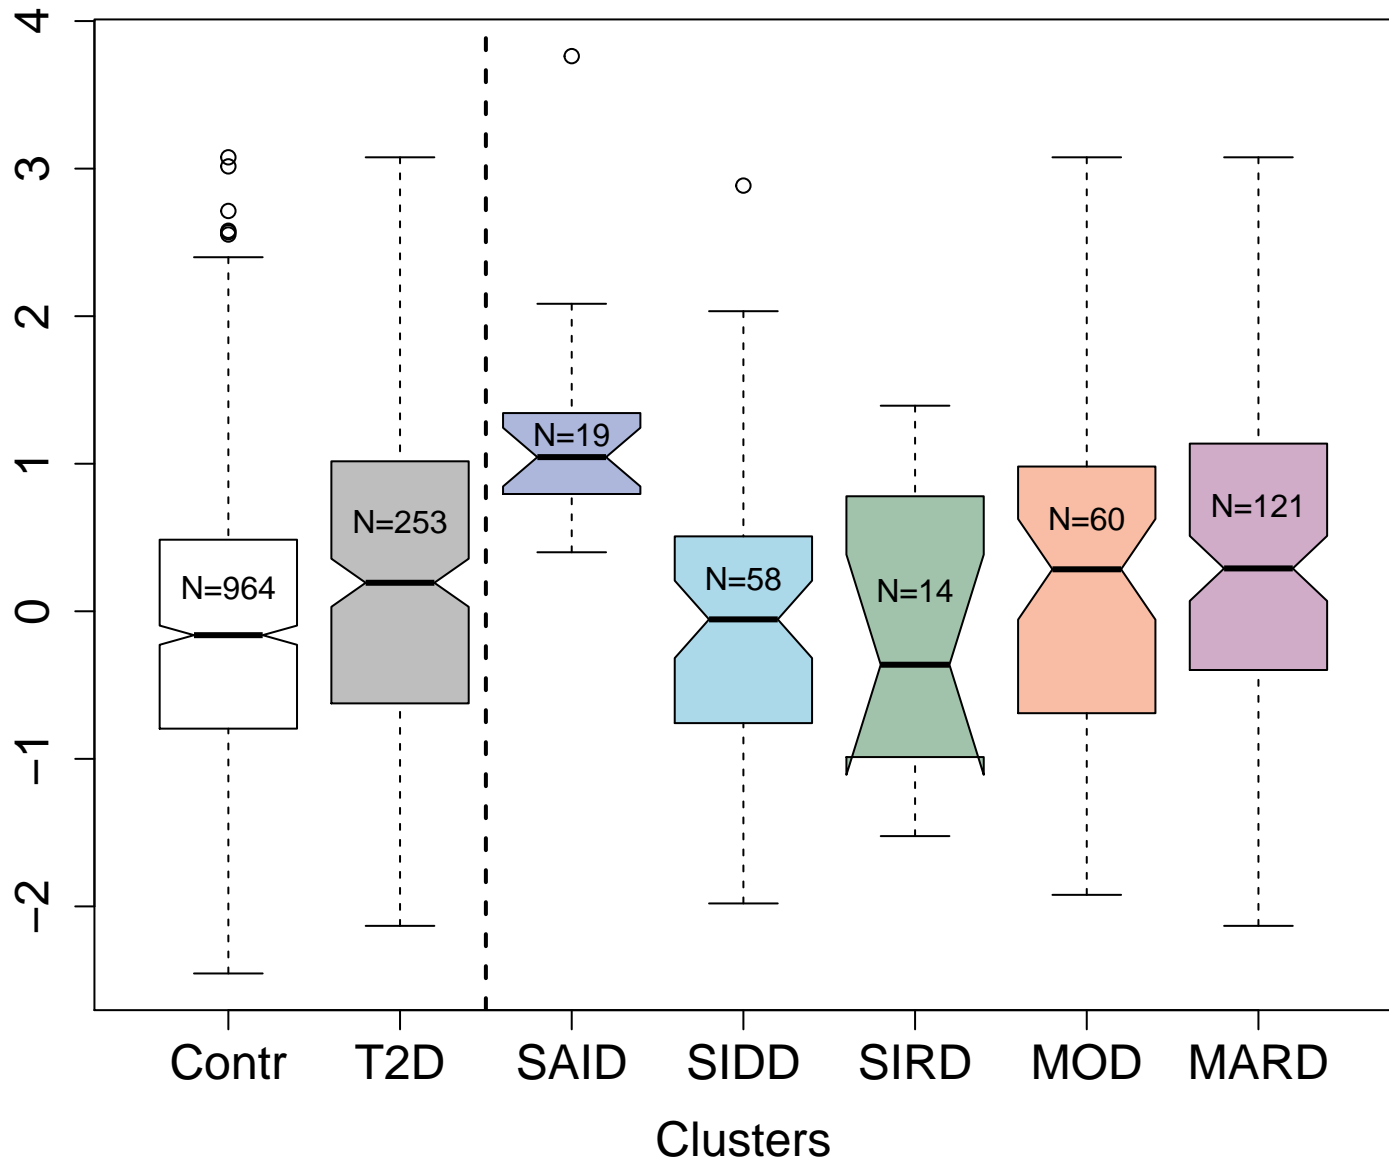

M46623 : X - 12729

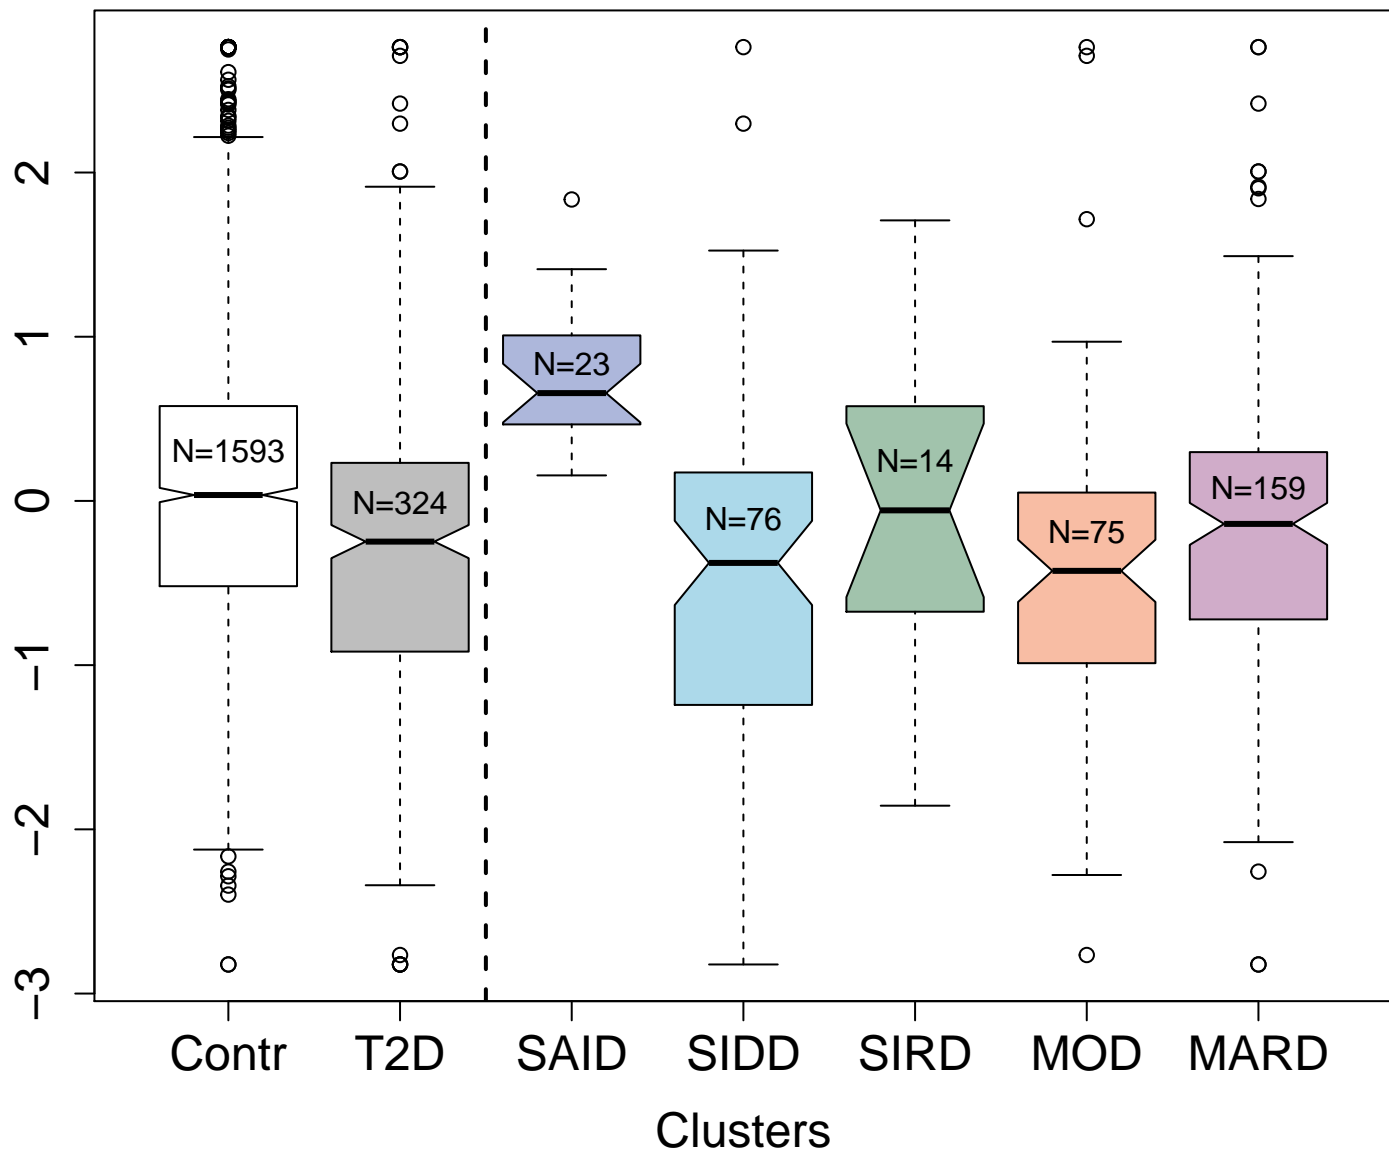

M35428 : tiglylcarnitine (C5:1-DC)

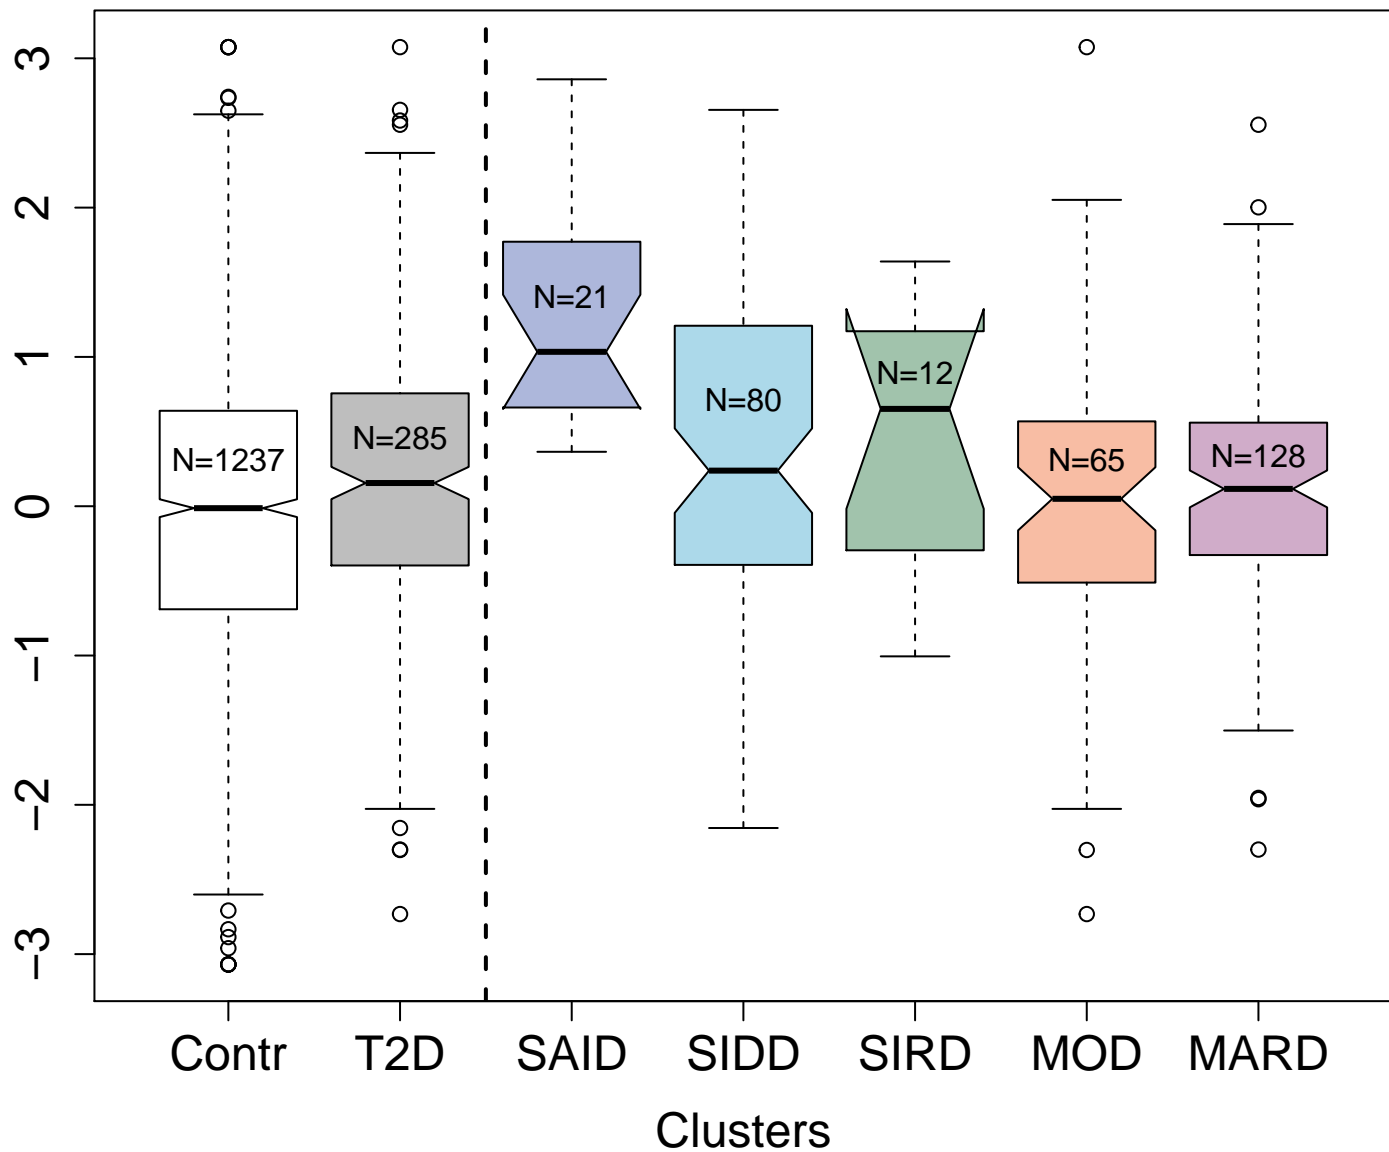

M63042 : 2,6-dihydroxybenzoic acid

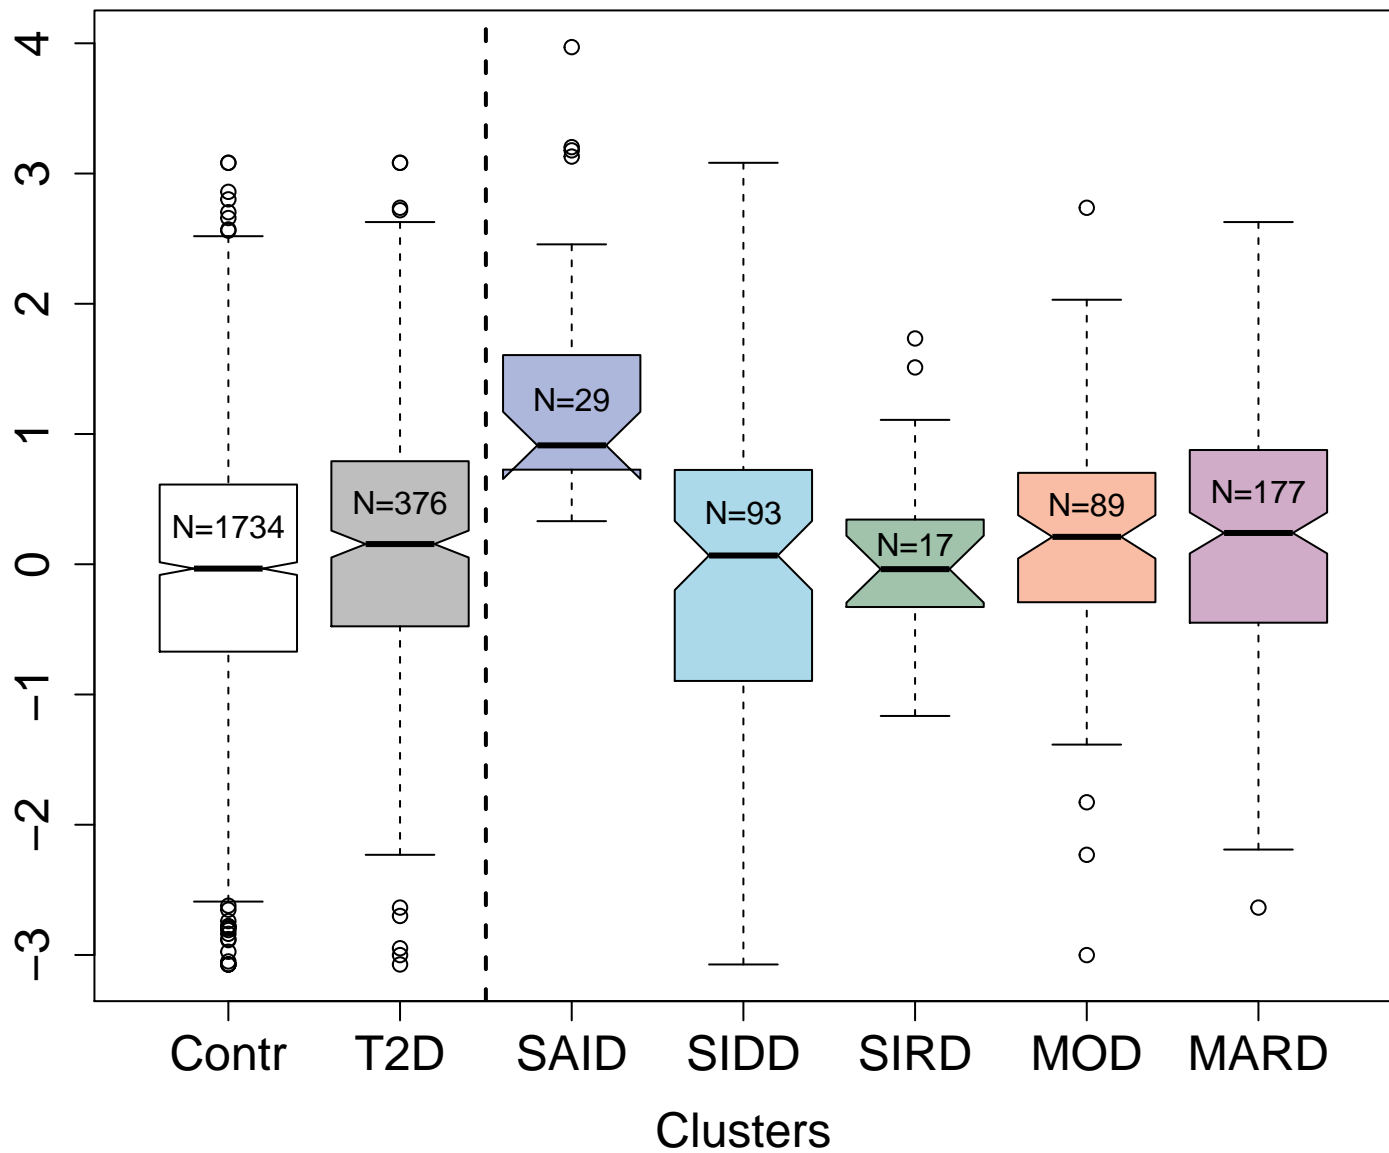

M52285 : oleate/vaccenate (18:1)

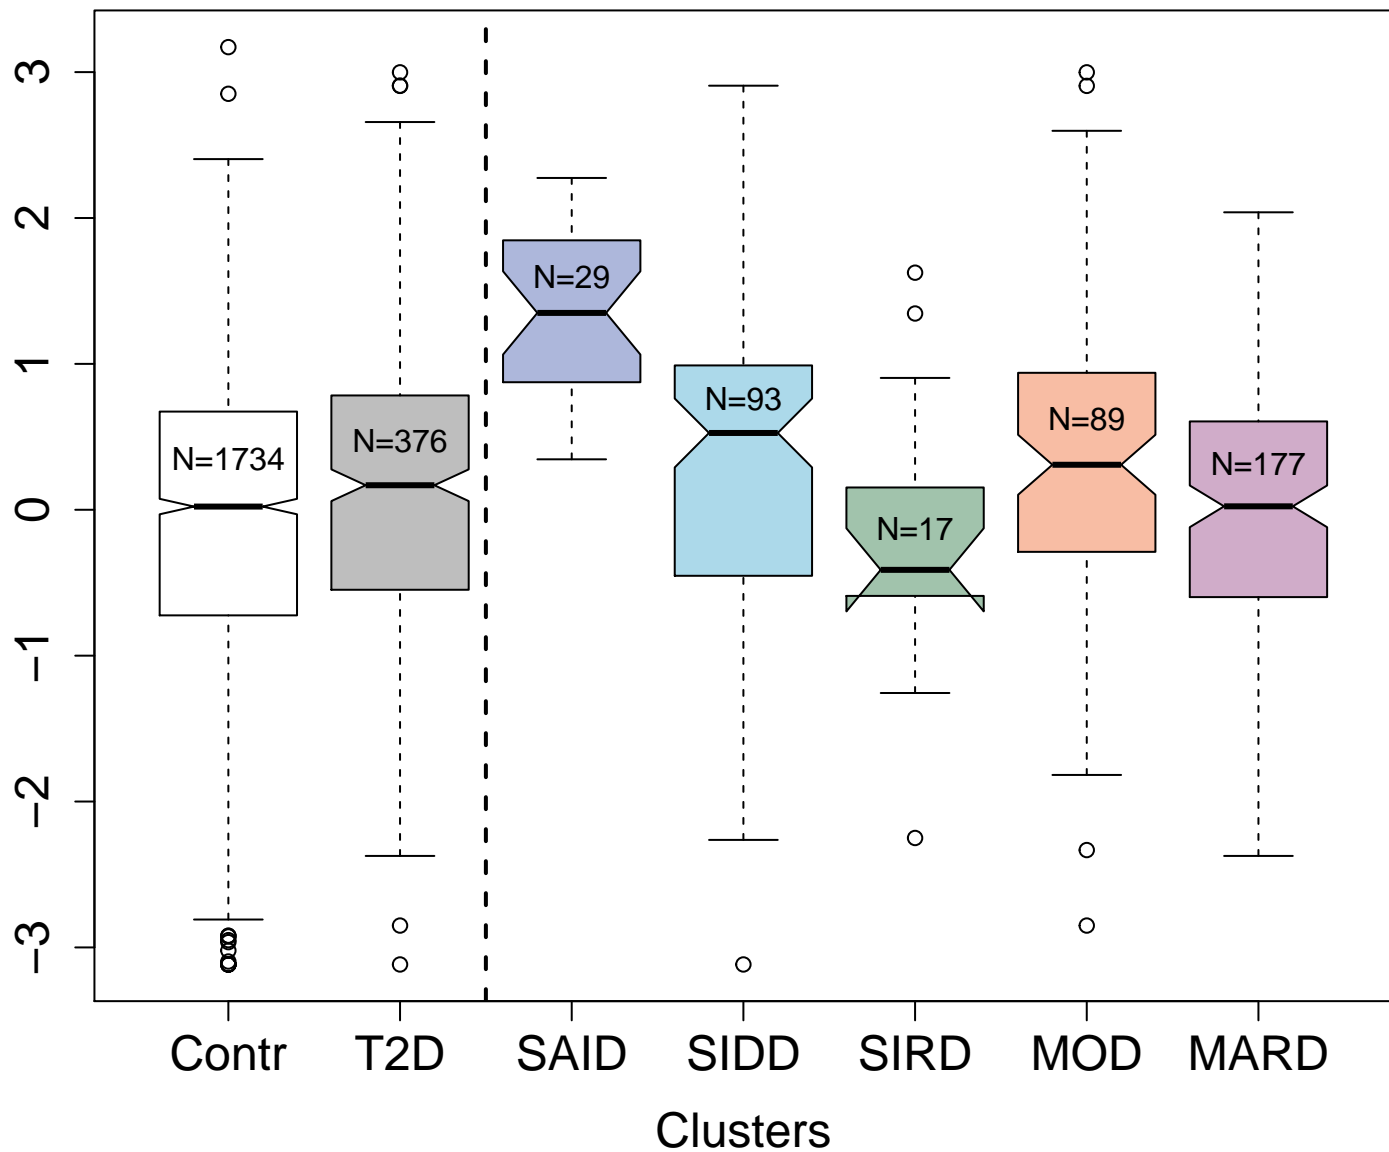

M47905 : X - 12026

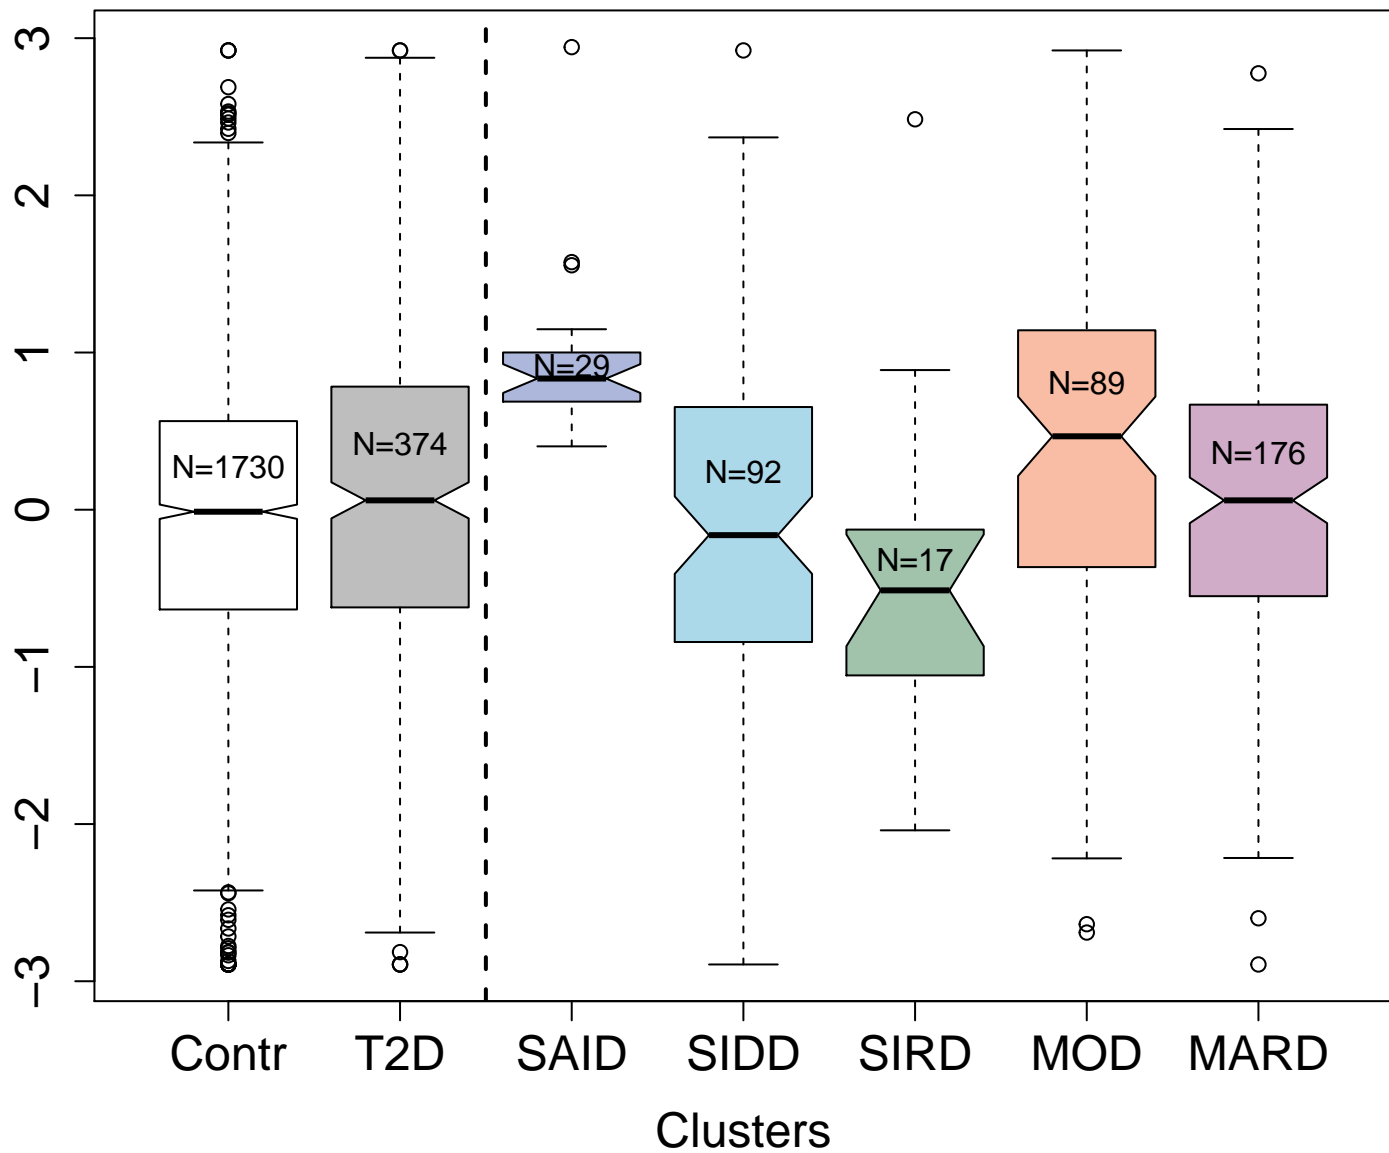

M47790 : X - 13684

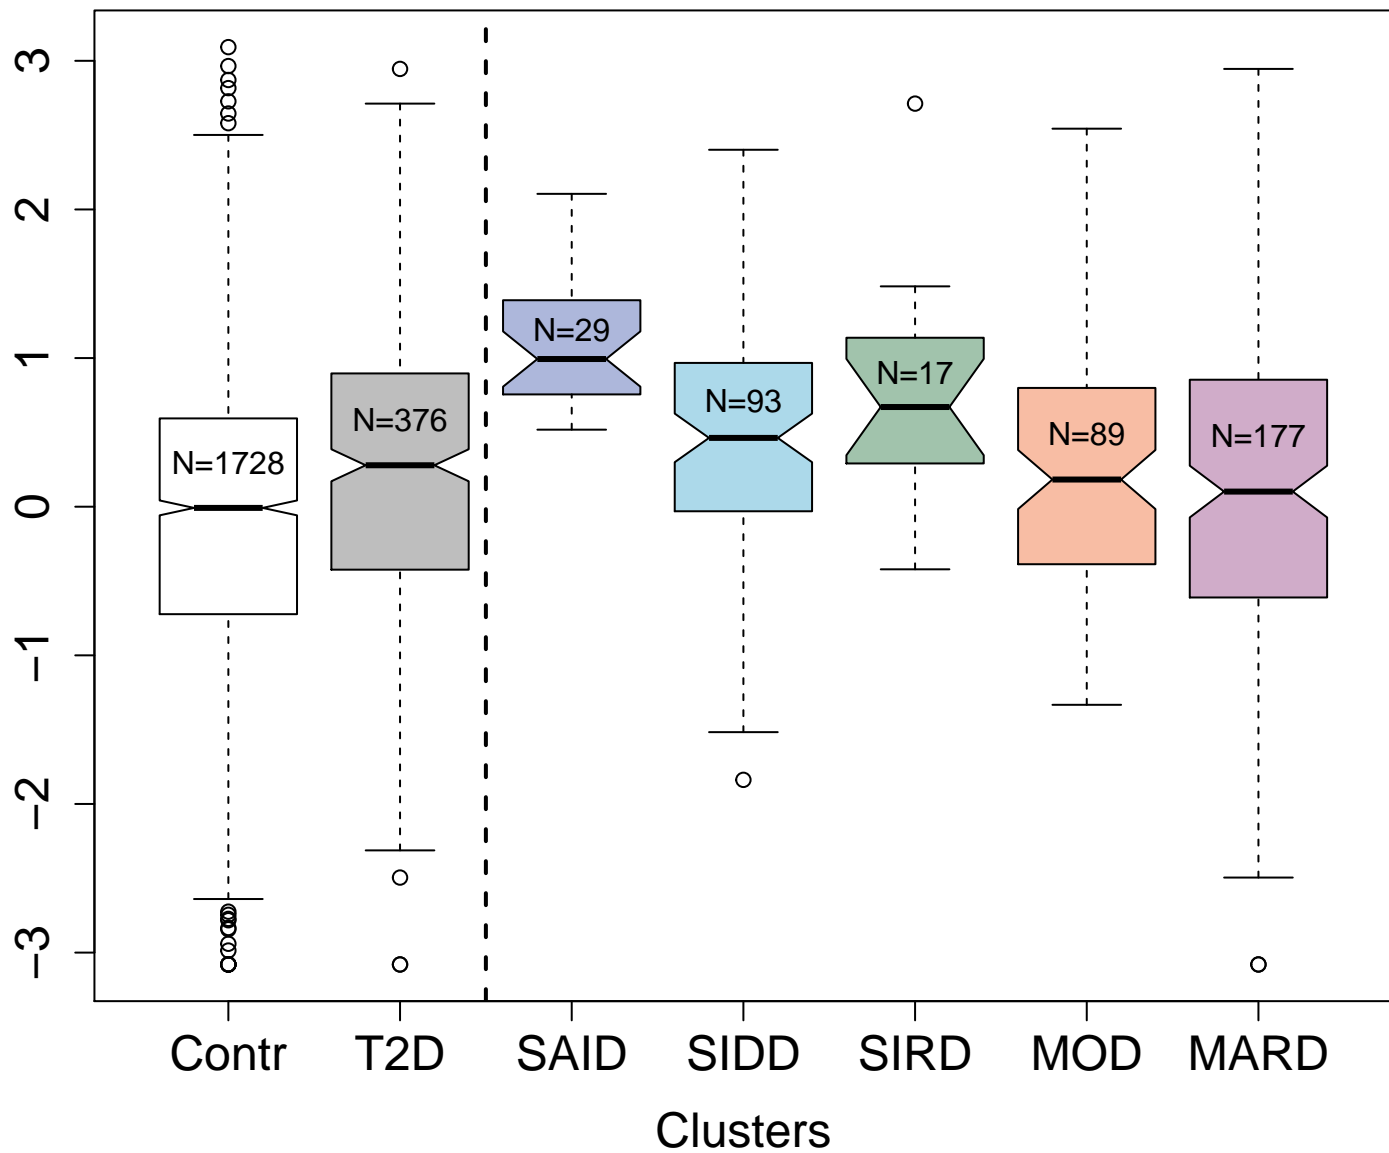

M62295 : sulfate of piperine metabolite C16H19NO3 (2)\*

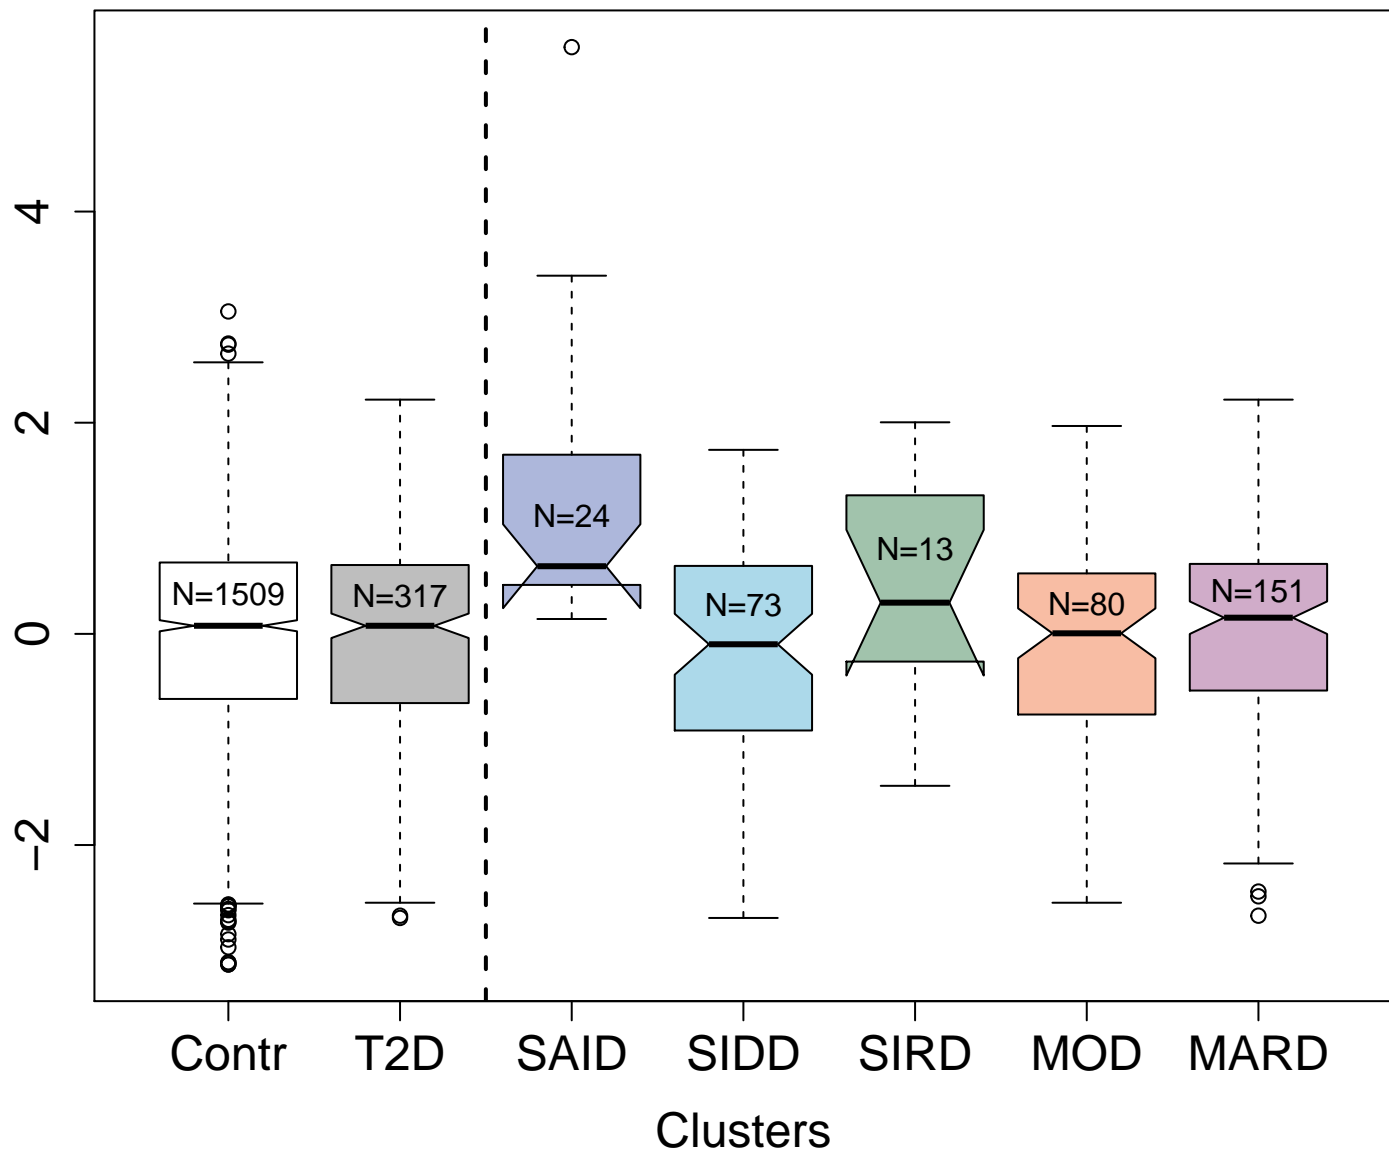



M38125 : 4-cholesten-3-one

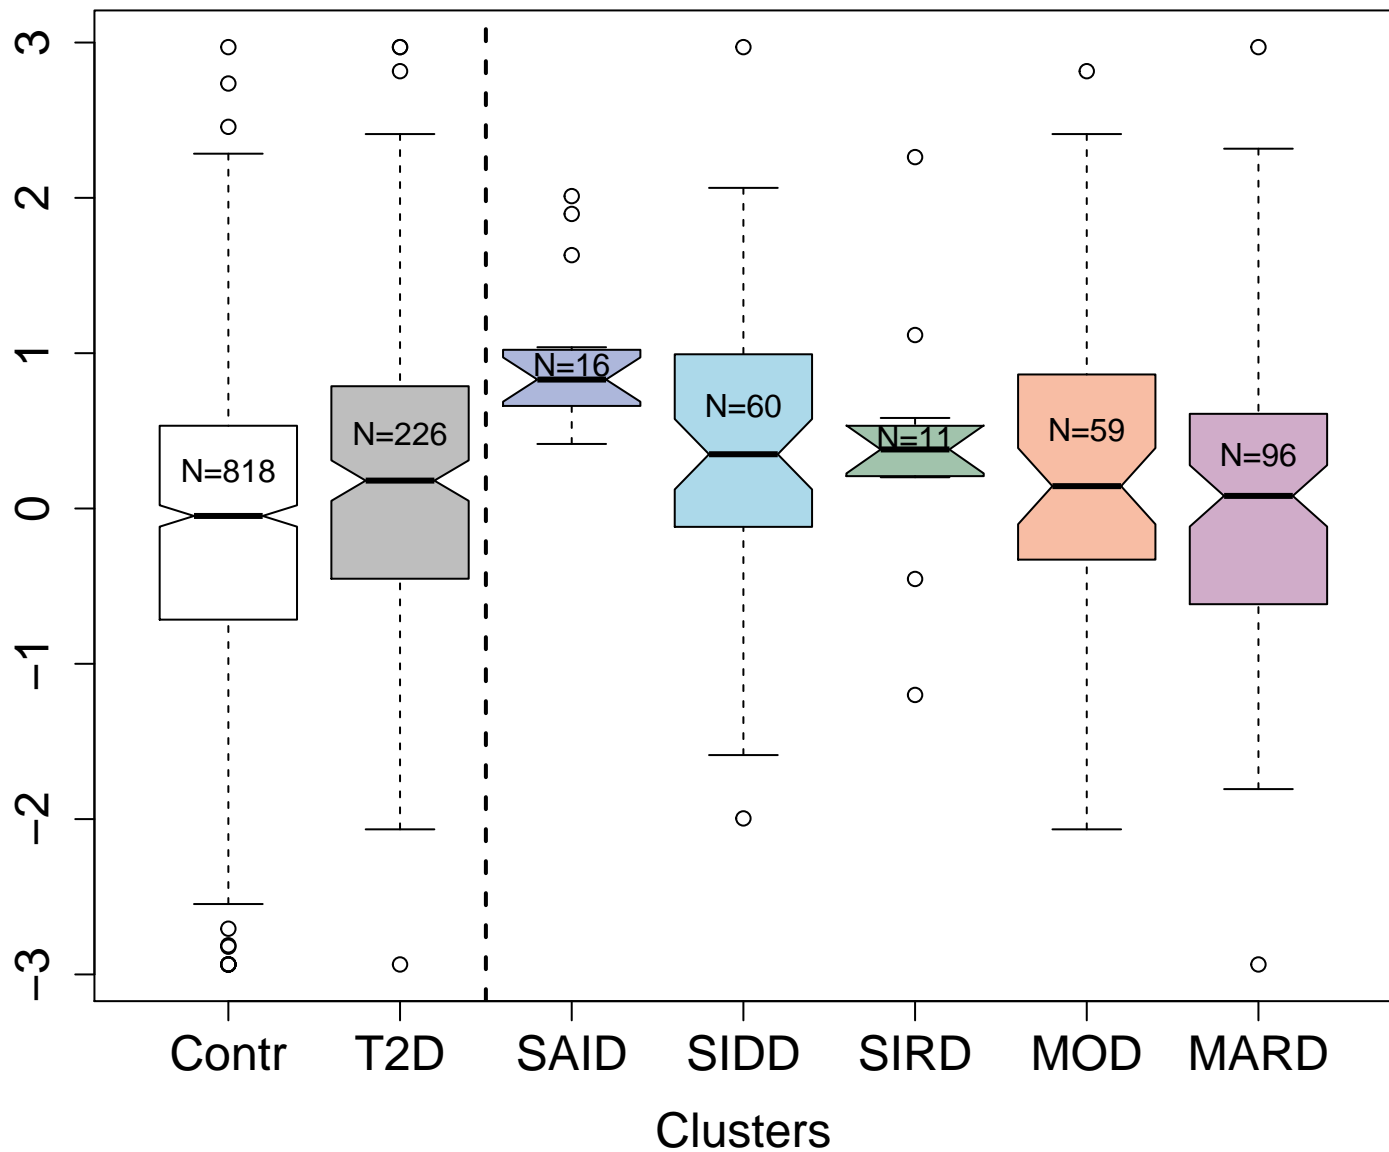

M63660 : glutamine conjugate of C6H10O2 (2)\*

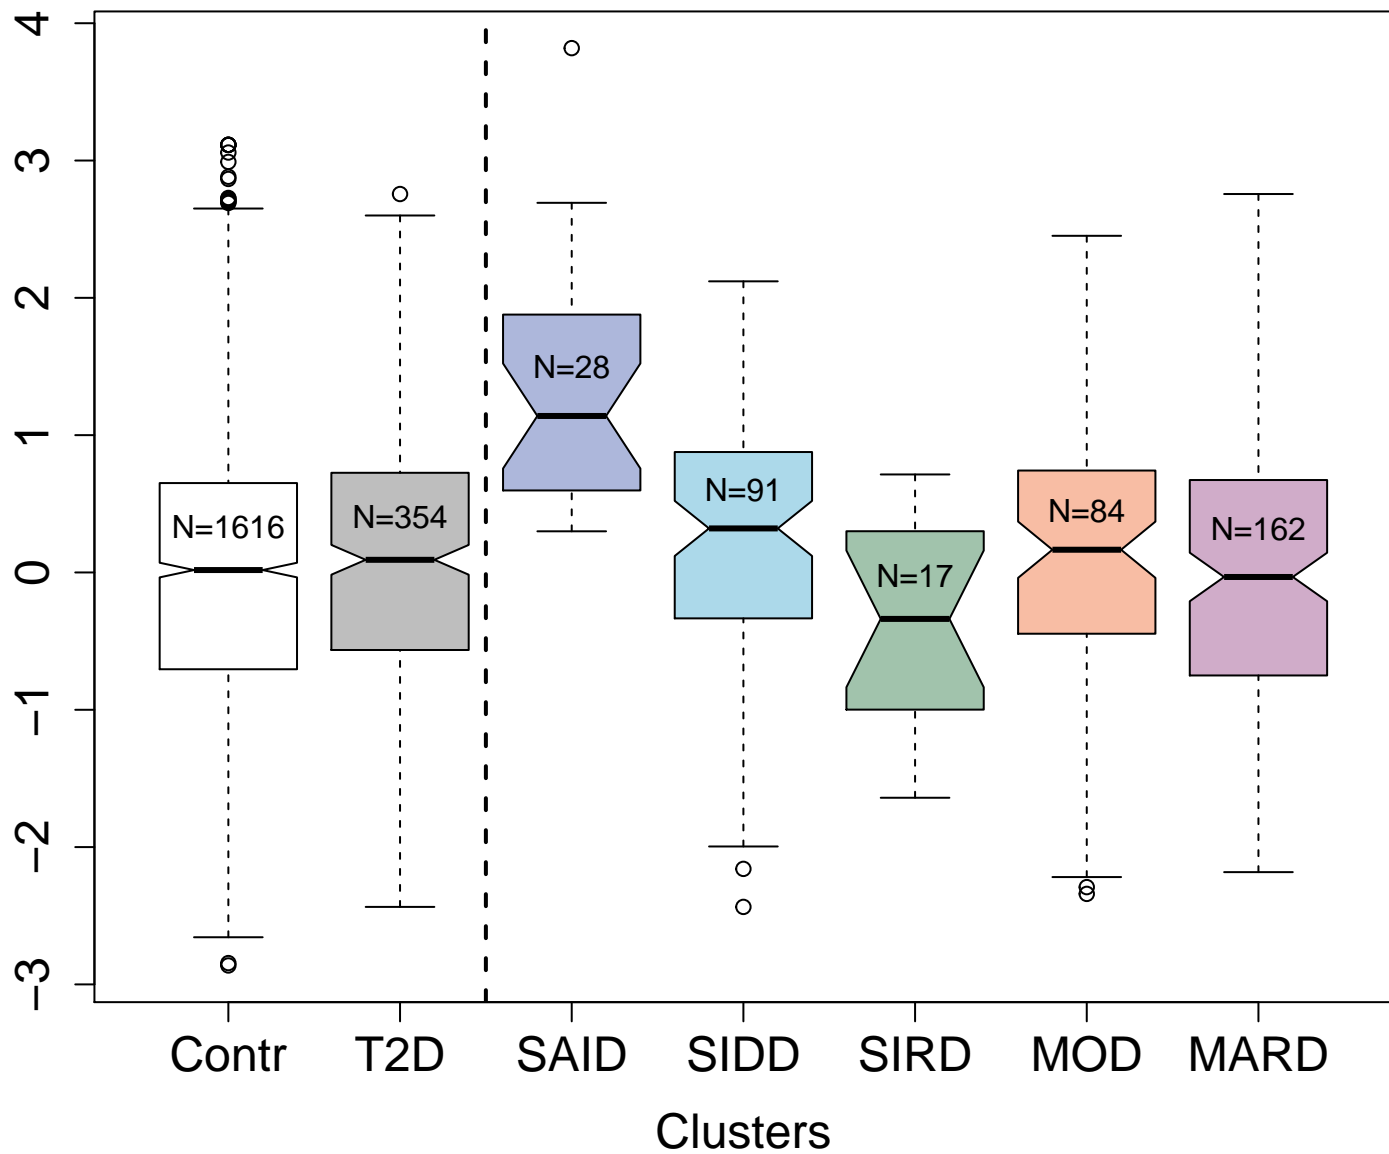

M17805 : dihomo-linoleate (20:2n6)

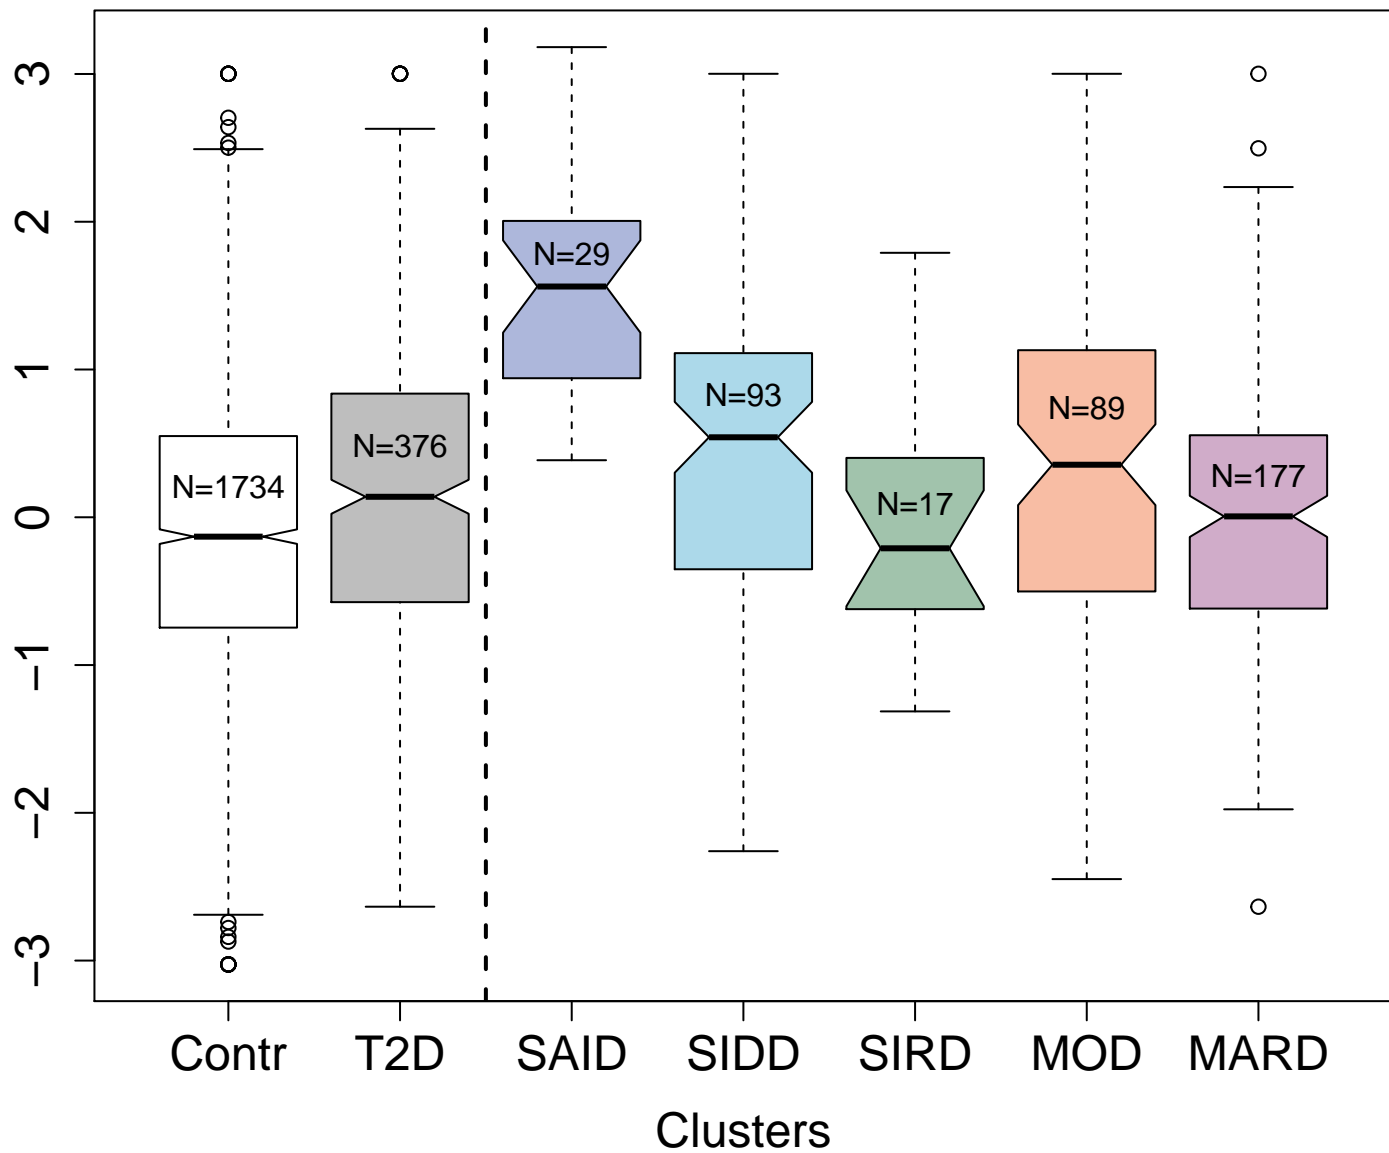

M46695 : X - 18913

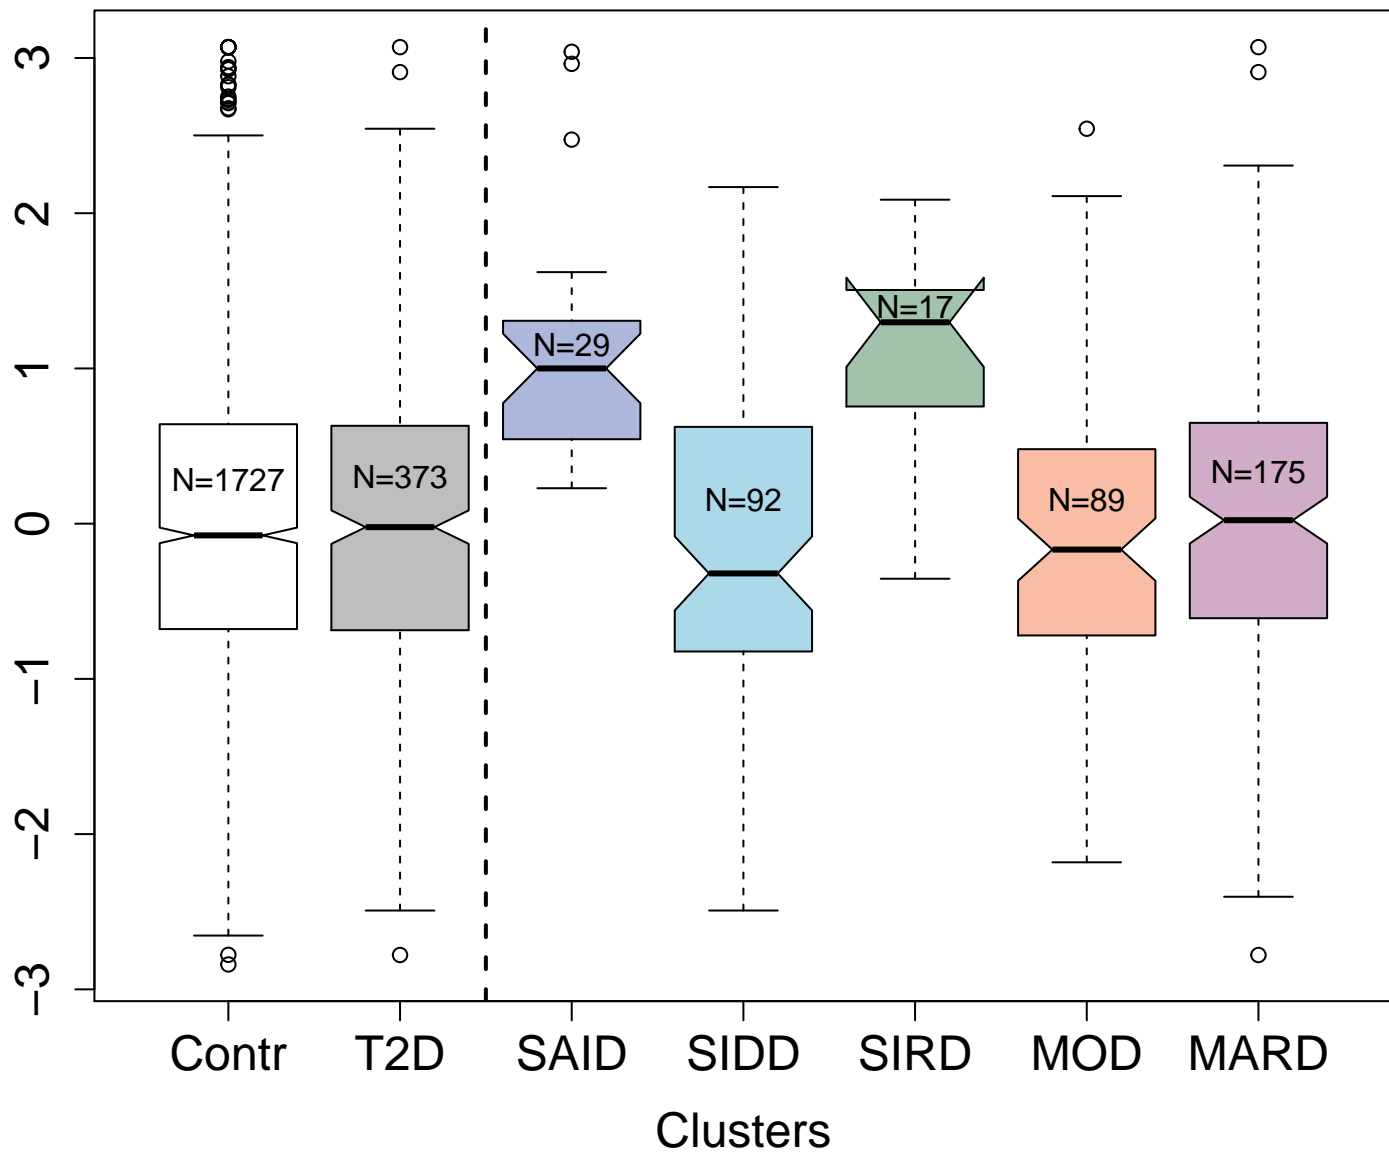

M12129 : beta-hydroxyisovalerate

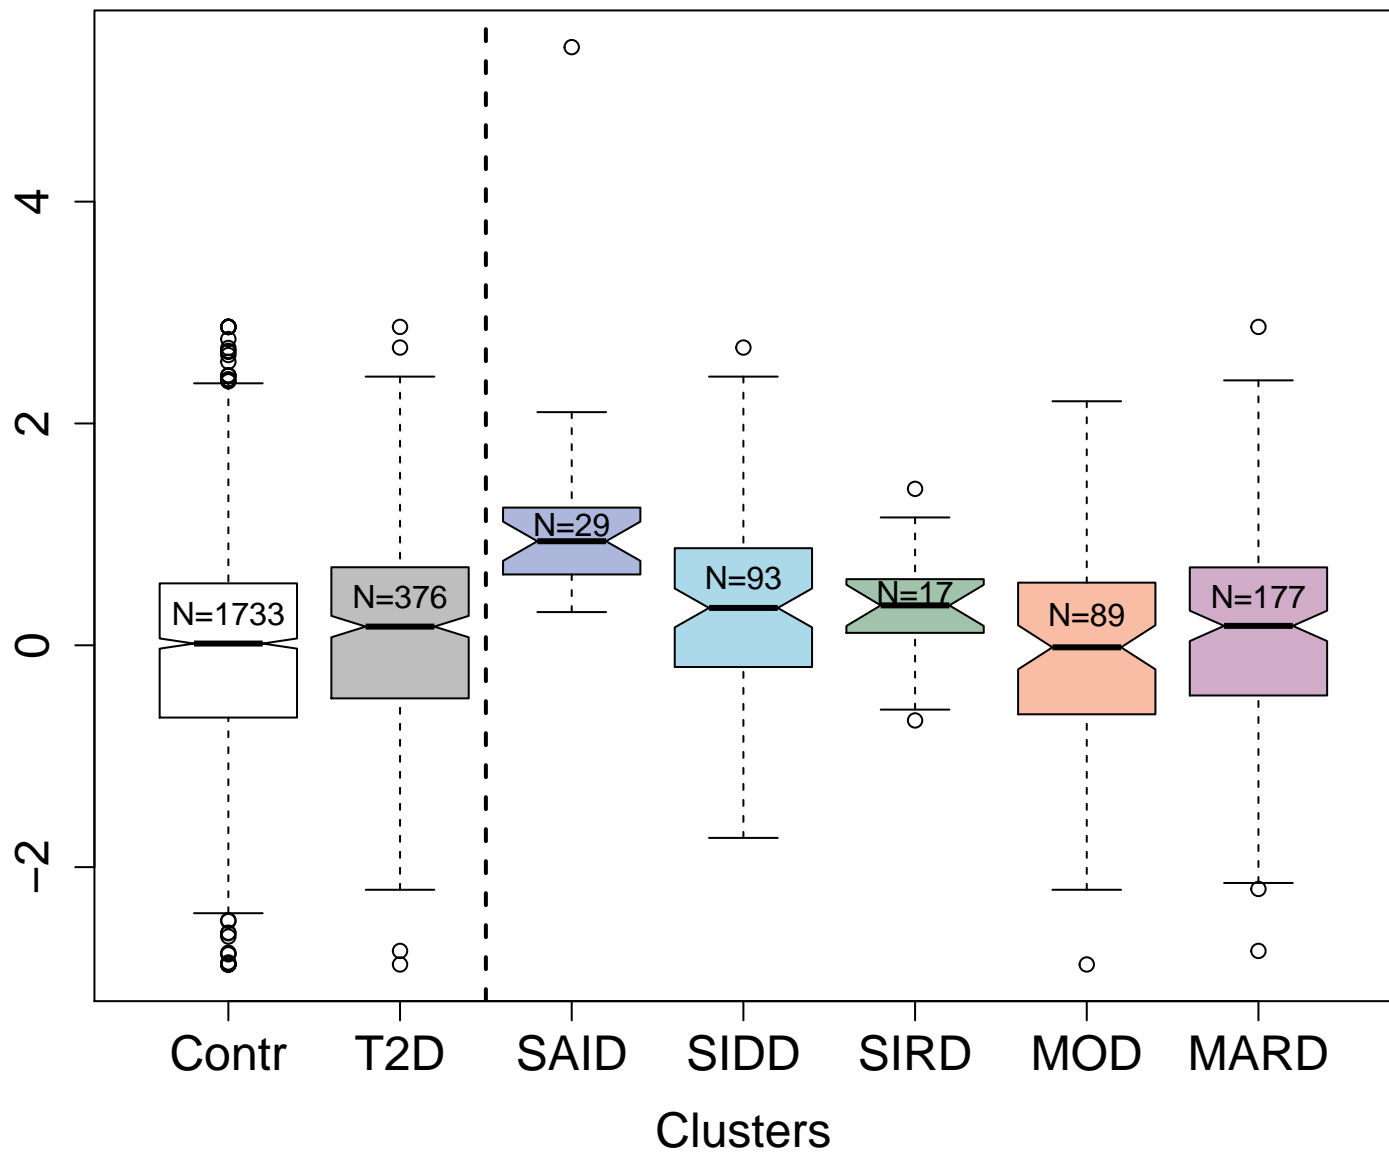

M1644 : heptanoate (7:0)

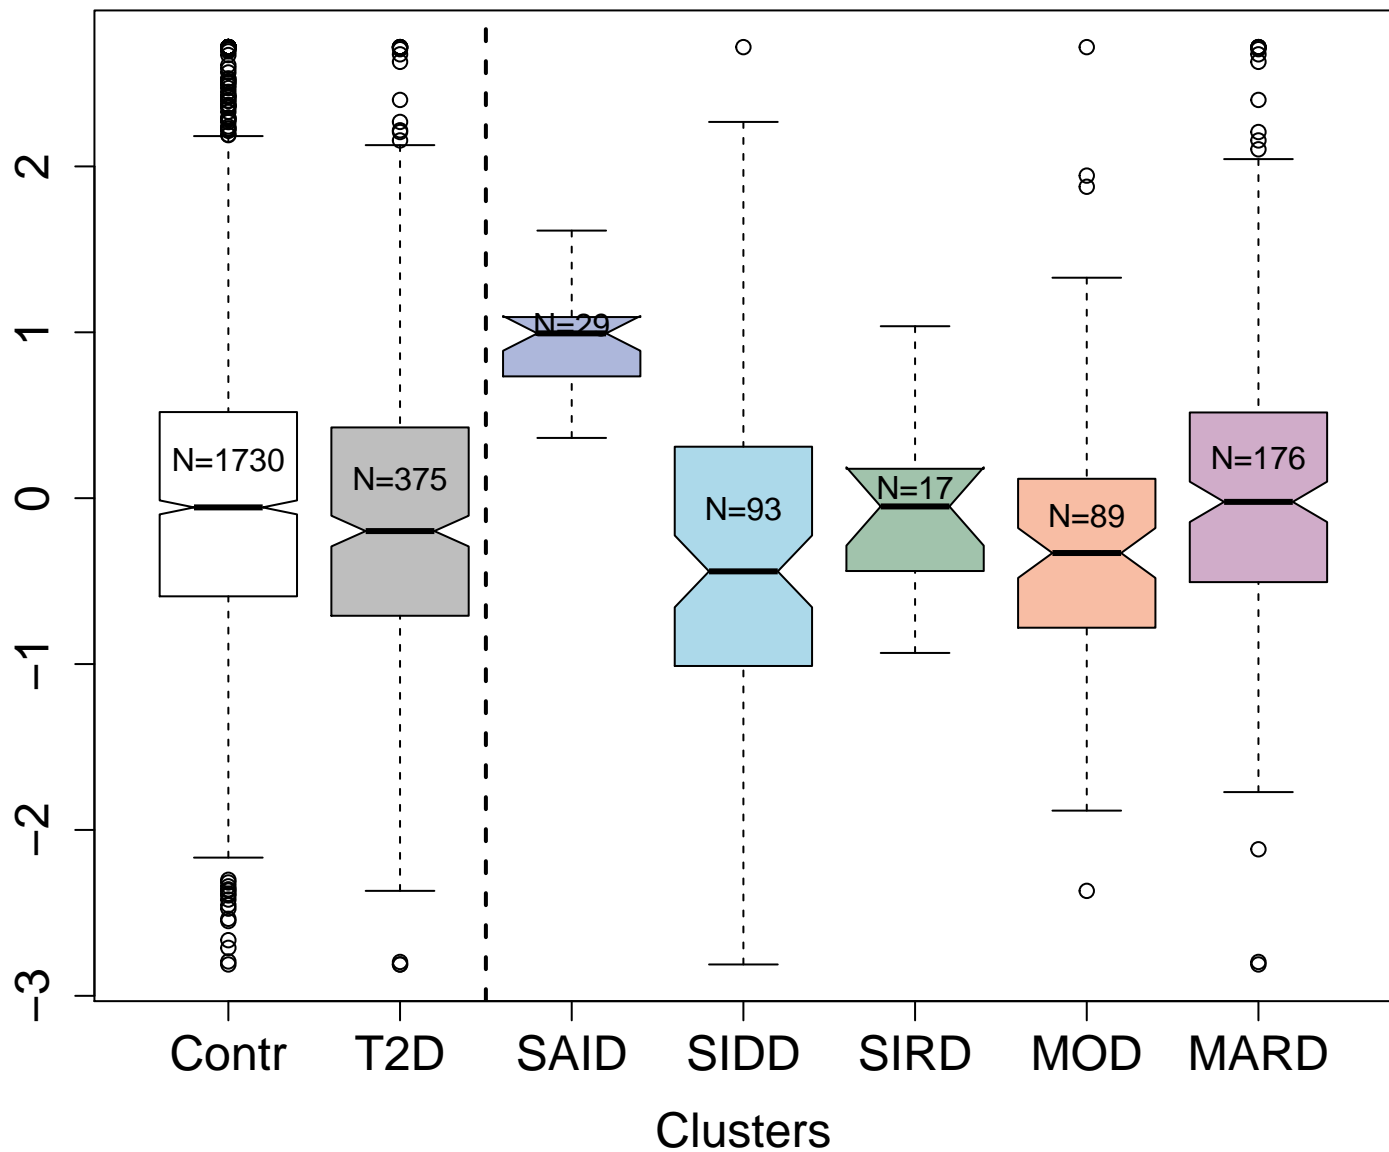

M19130 : 1,2-dipalmitoyl-GPC (16:0/16:0)

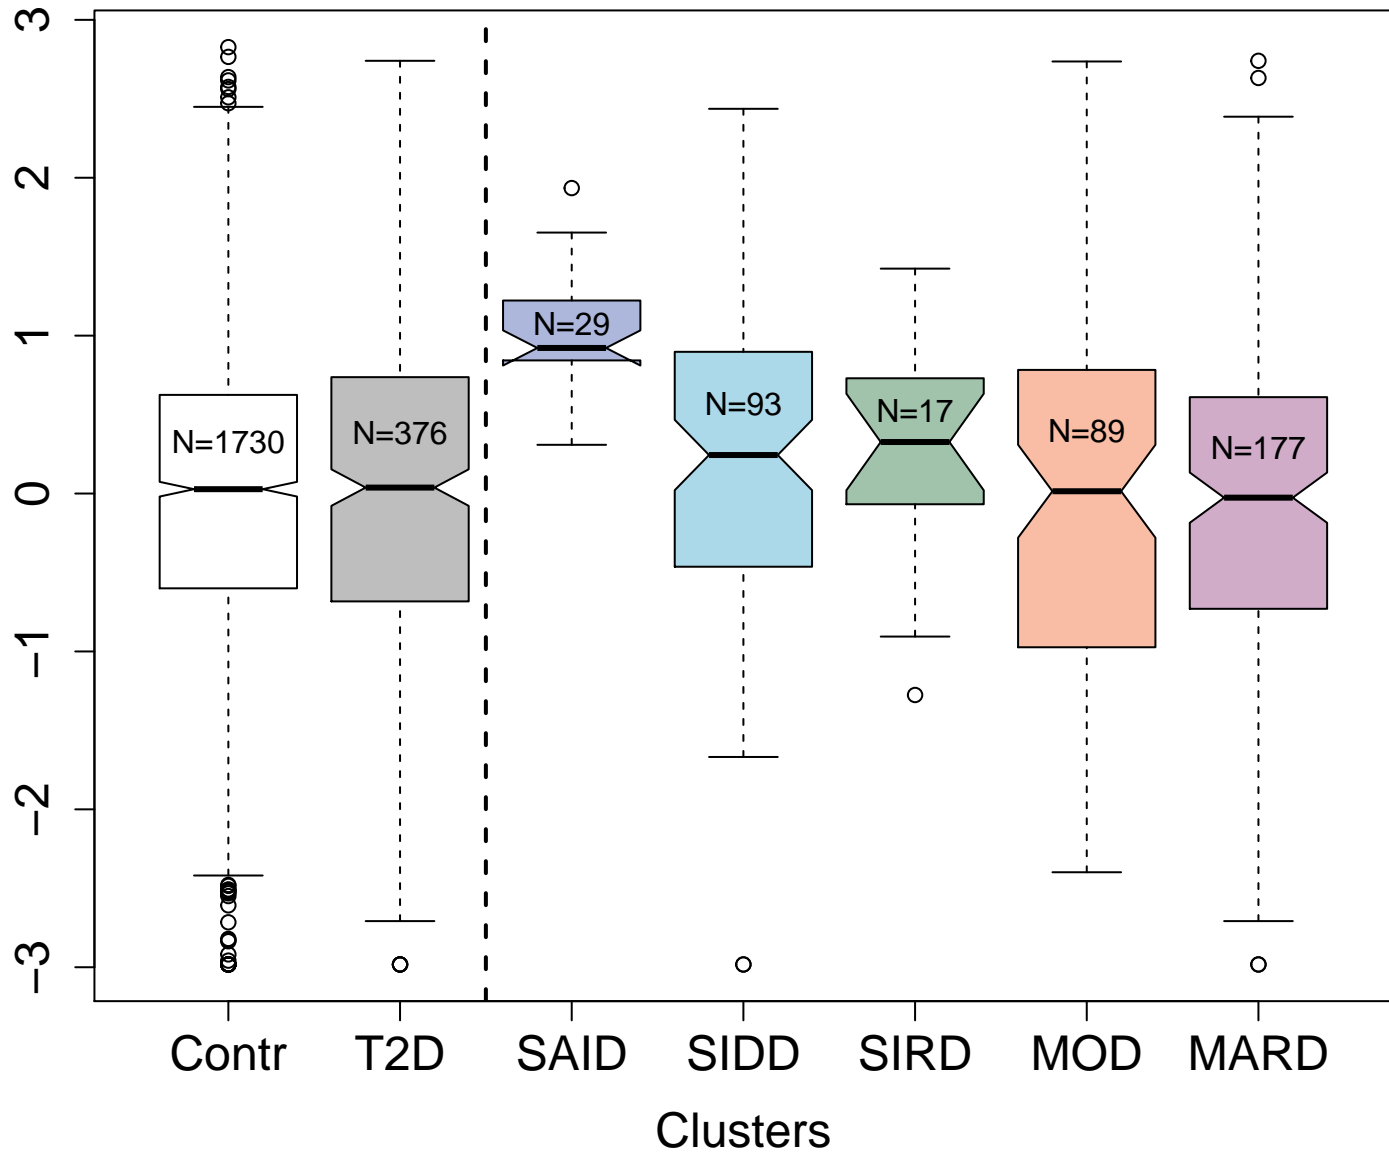

M46707 : X - 17653

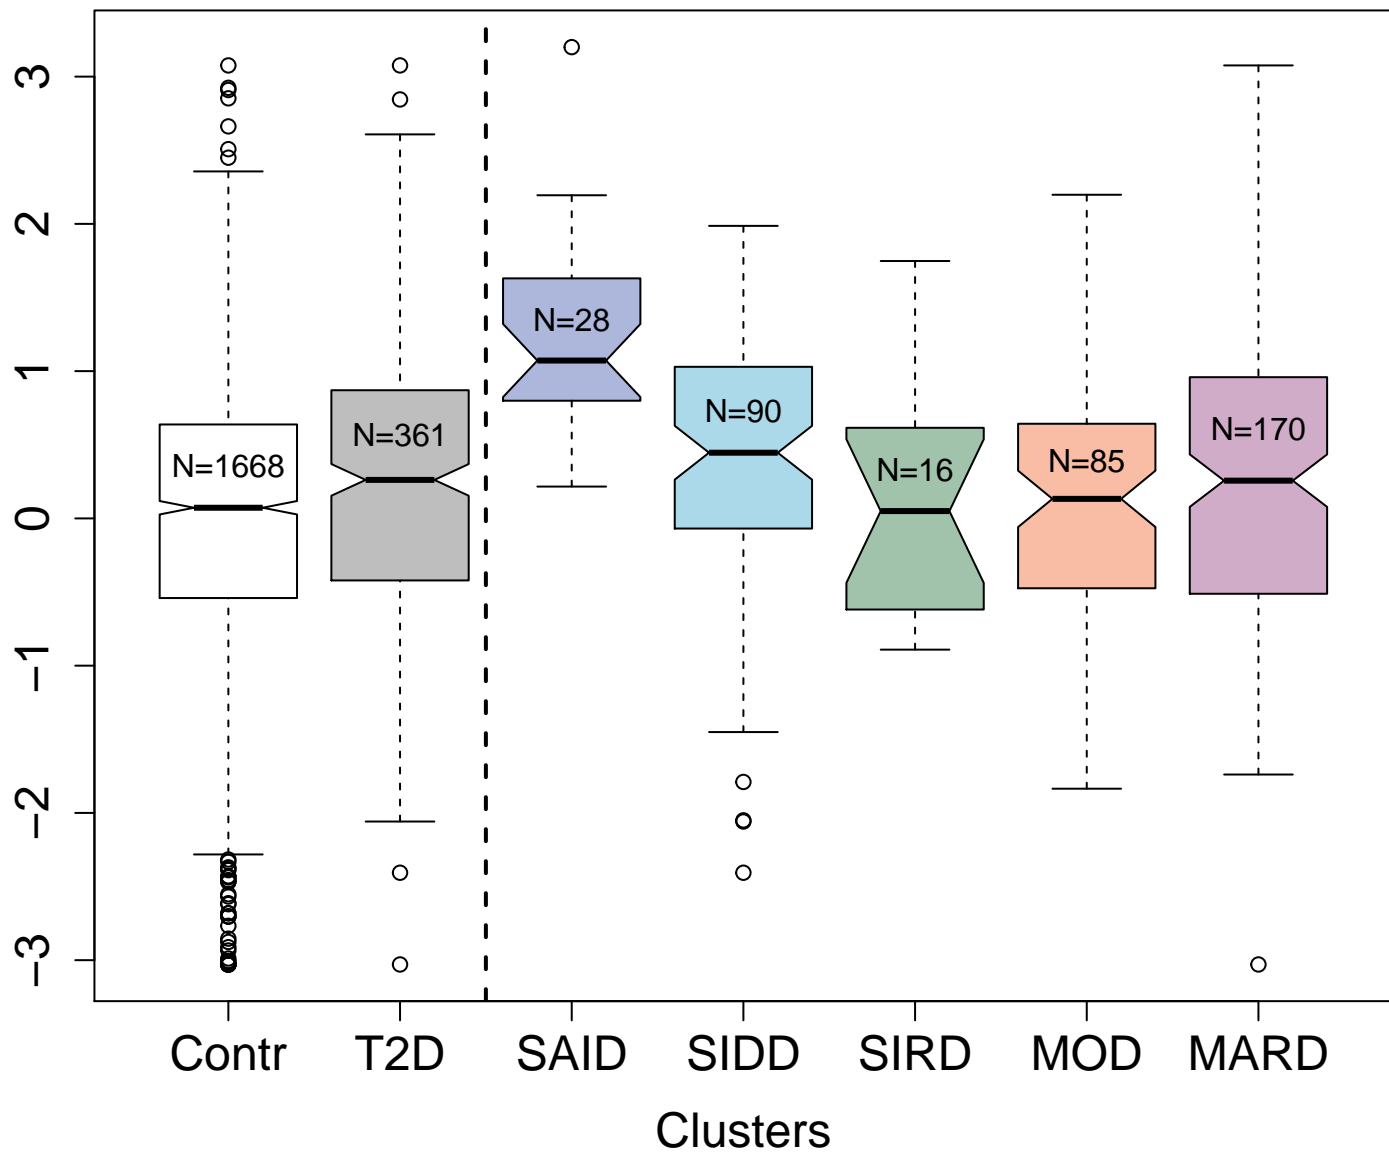



M52813 : X - 24494

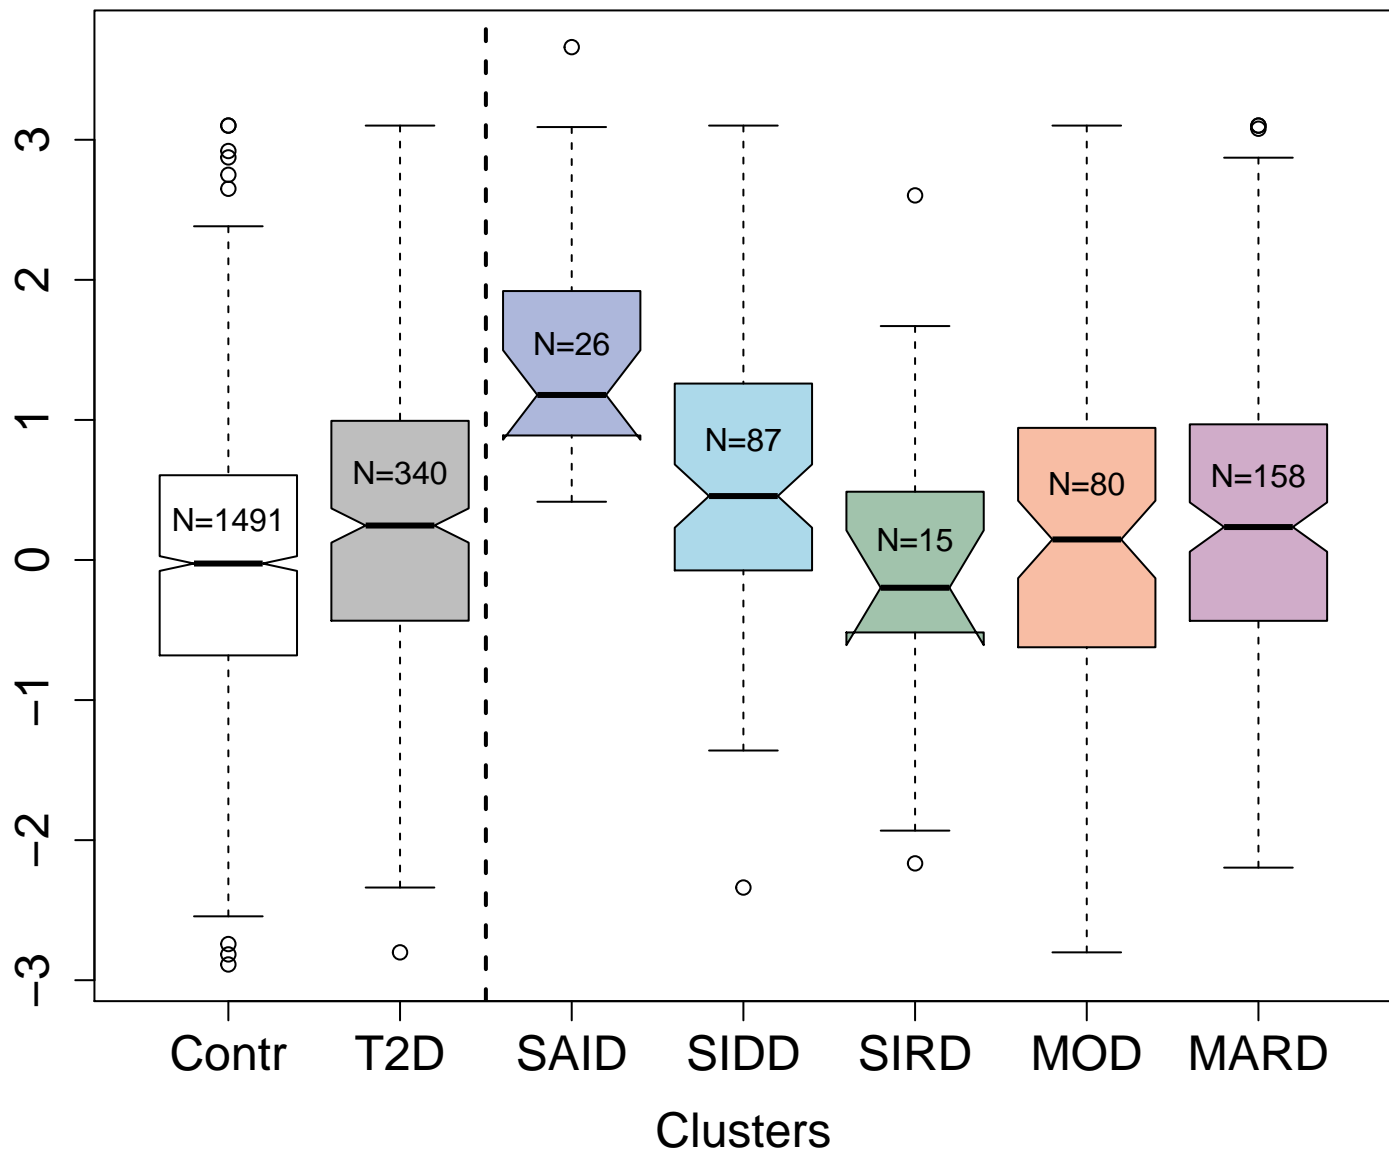

M46387 : X - 21342

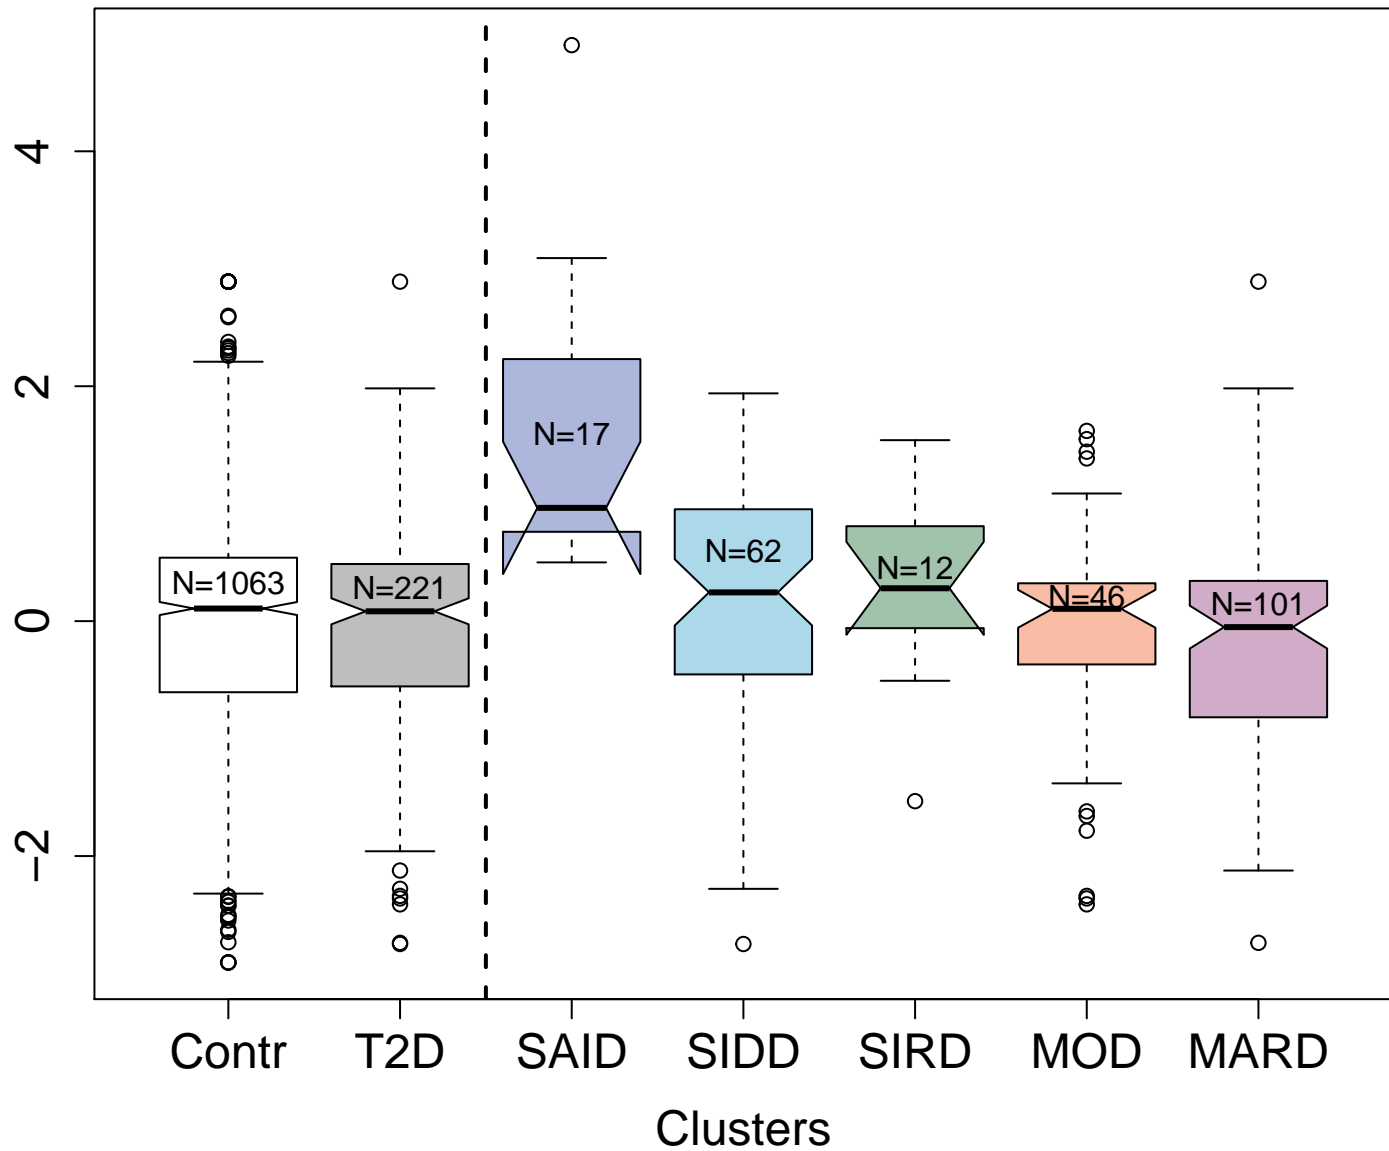

M47643: X - 12125

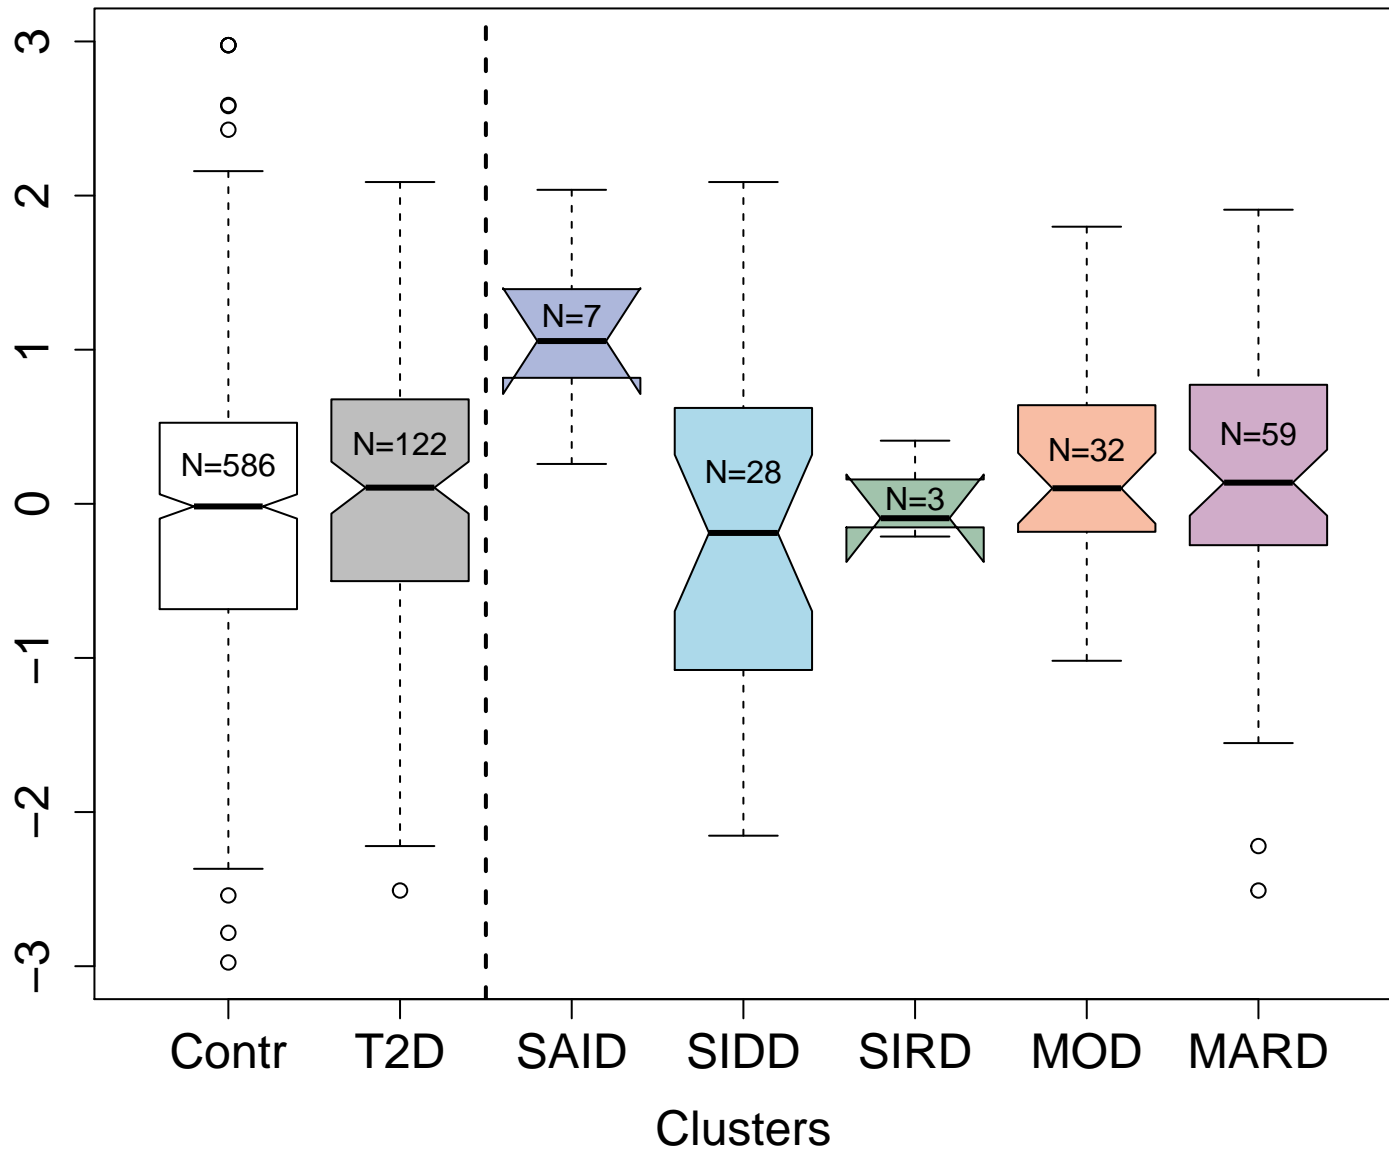

M46354 : X - 21310

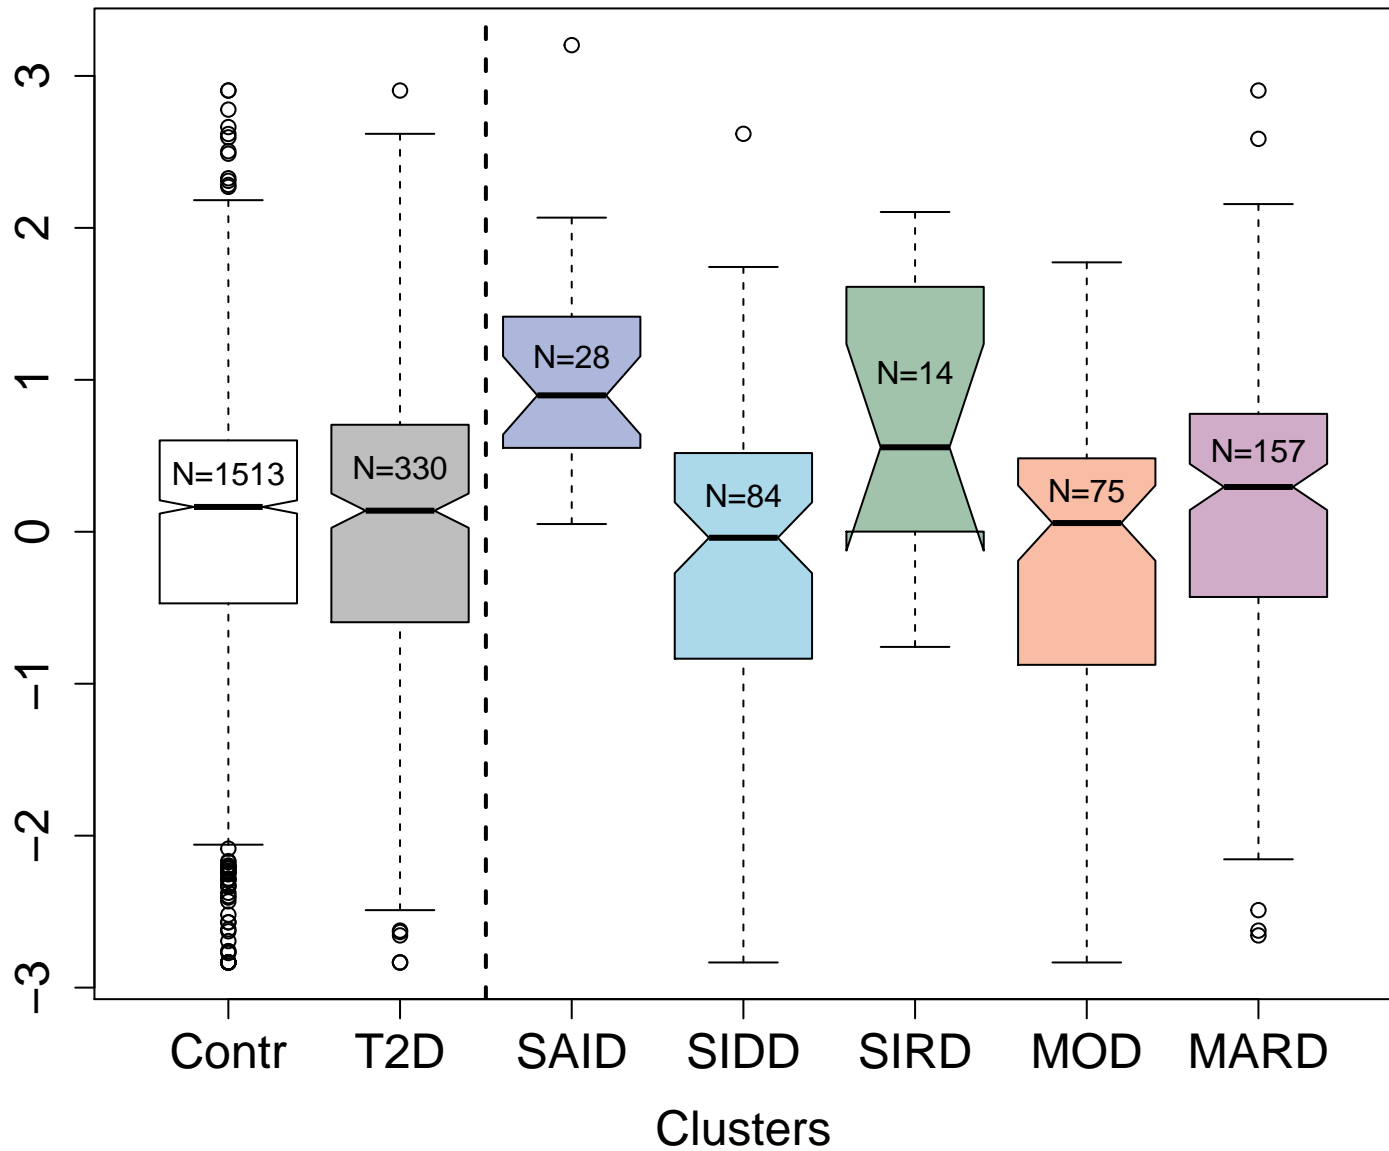

M2137 : biliverdin

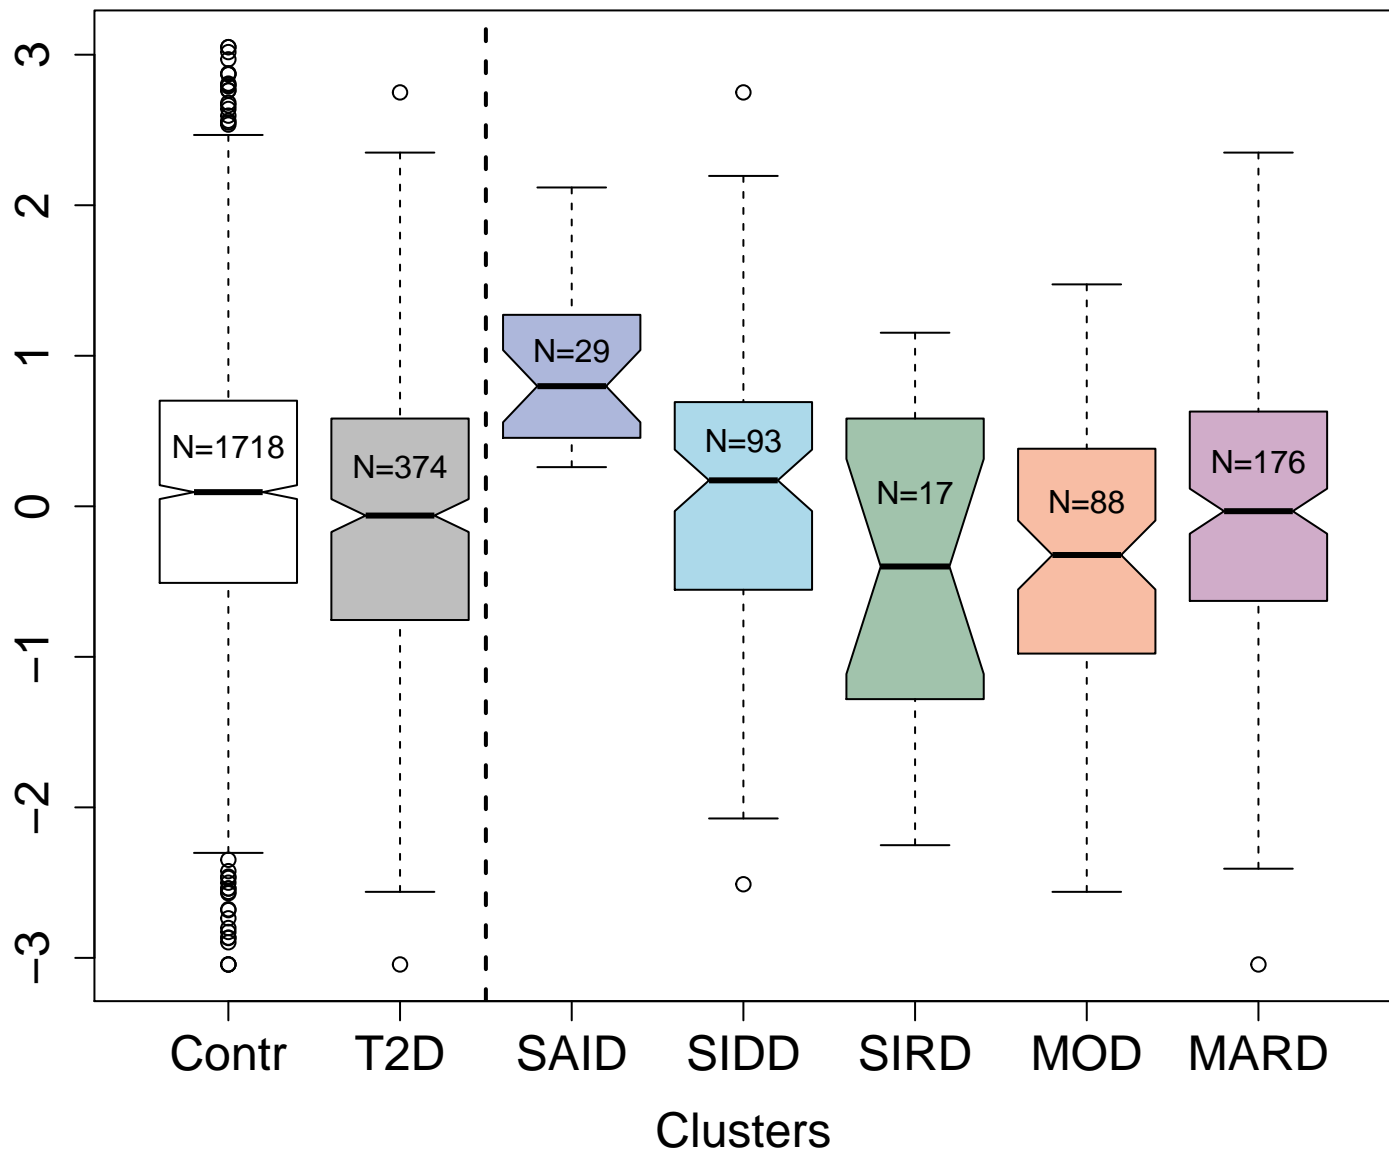

M48009 : X - 17357

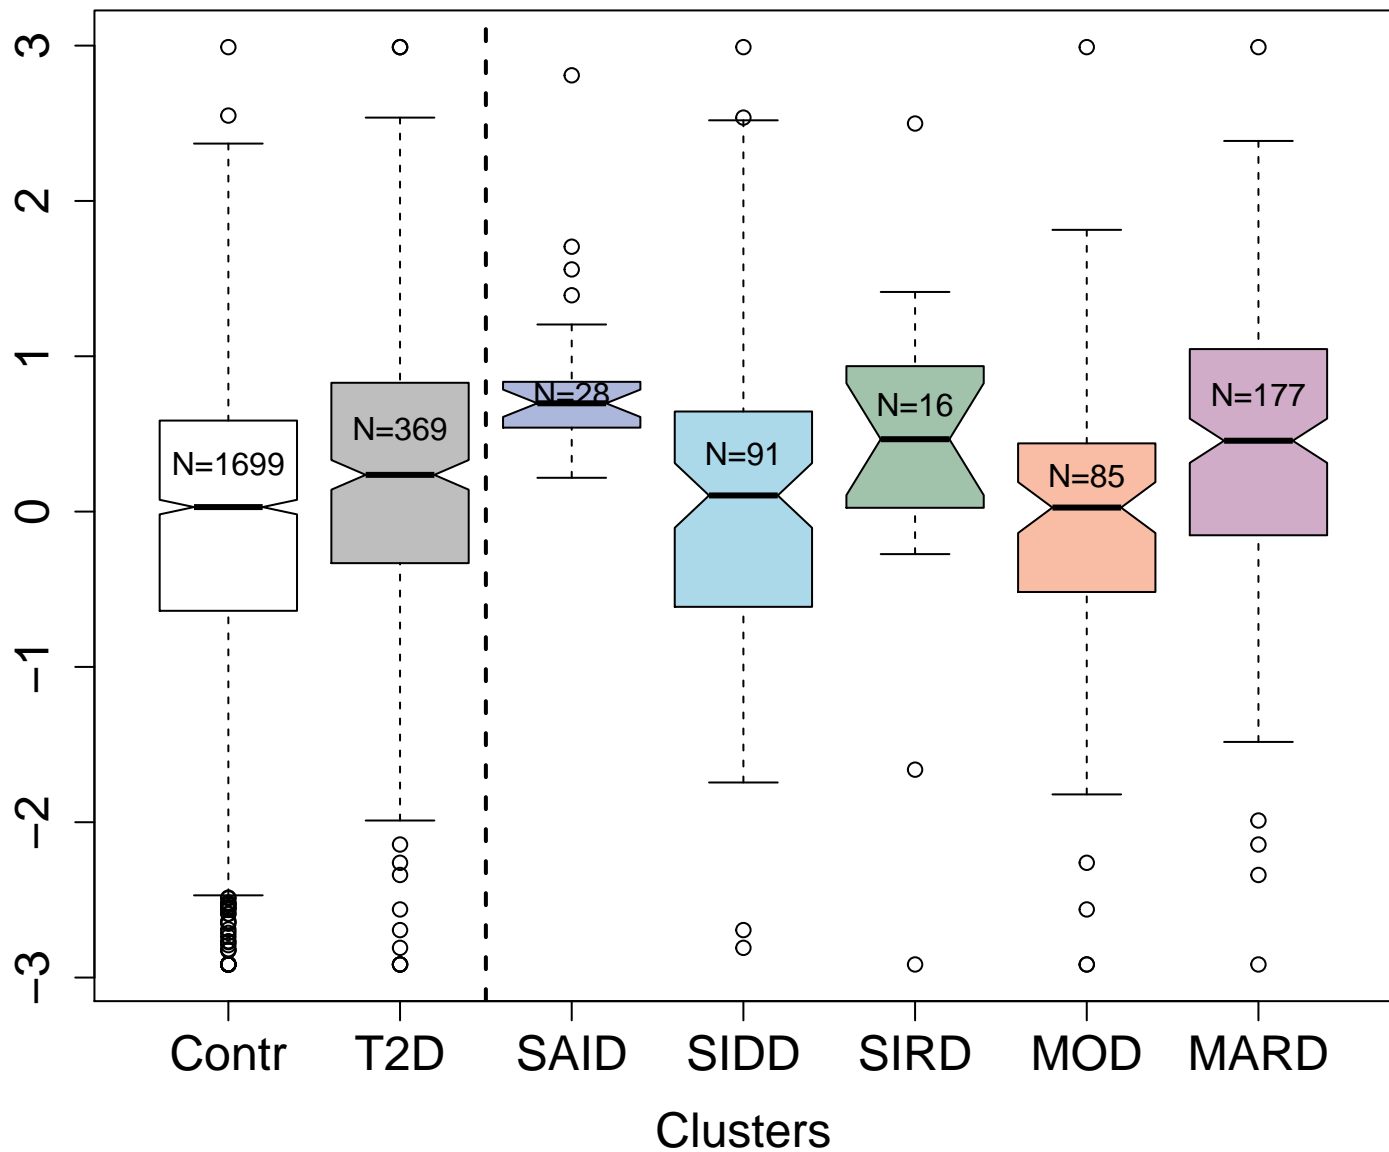

M1114 : deoxycholate

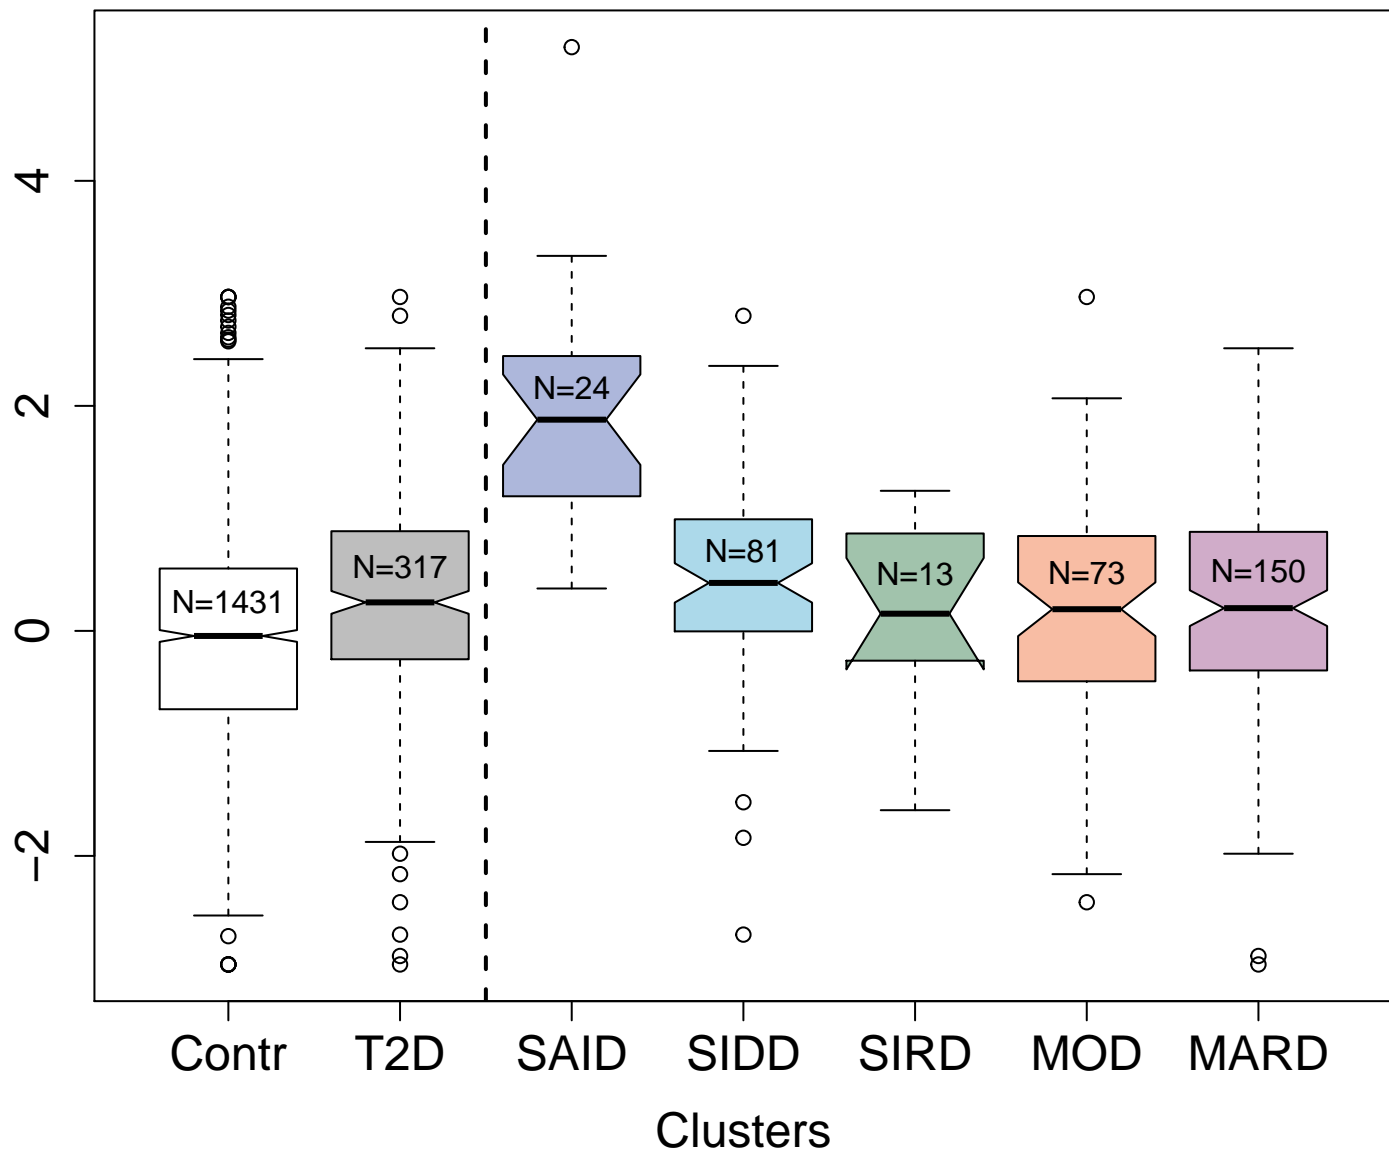

M38599 : celecoxib

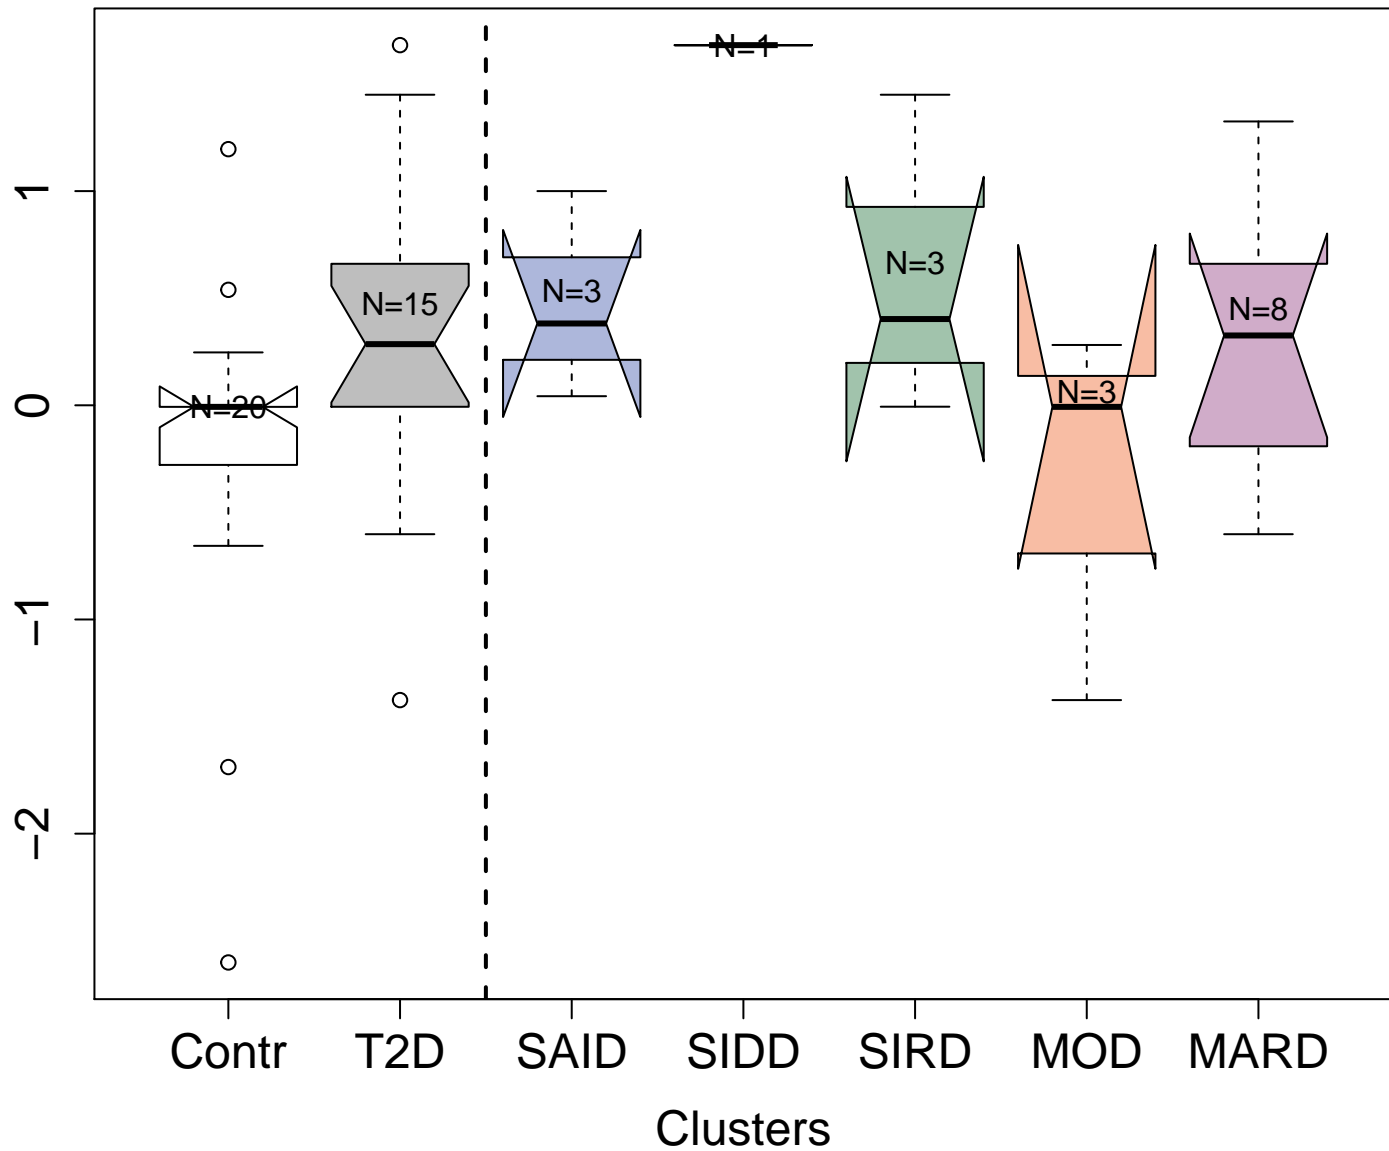



M48255 : arabinonate/xylonate

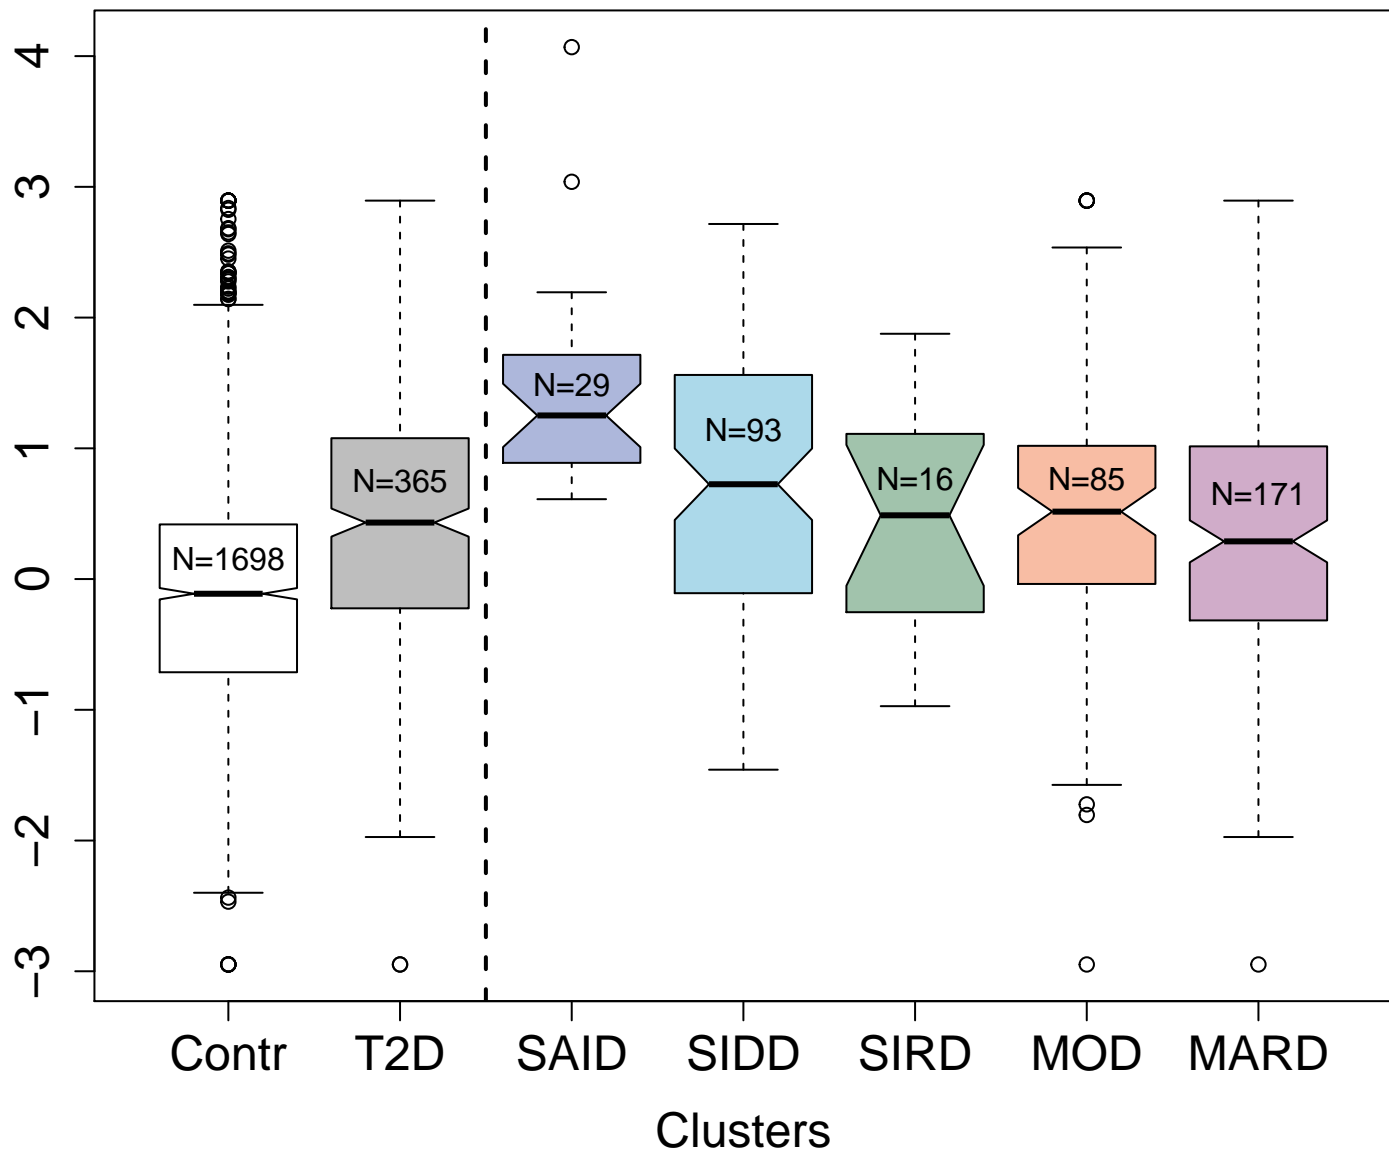

M47101 : N-methylpiperolate

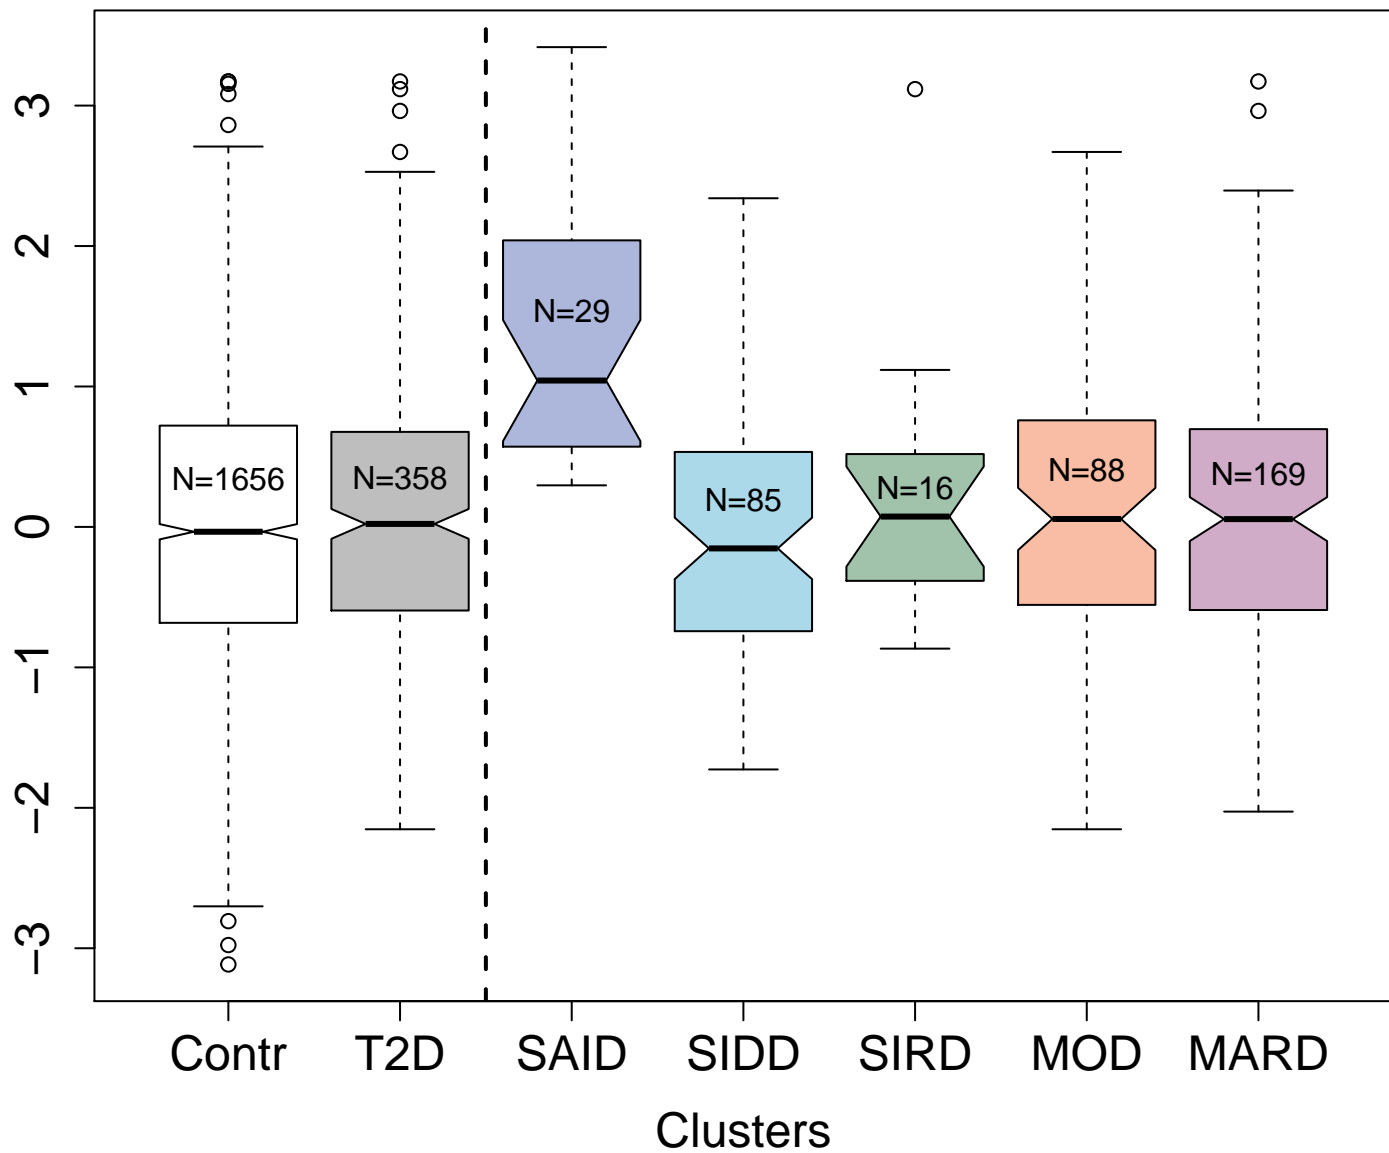

M43255 : N-acetyl-L-1-methylhistidine\*

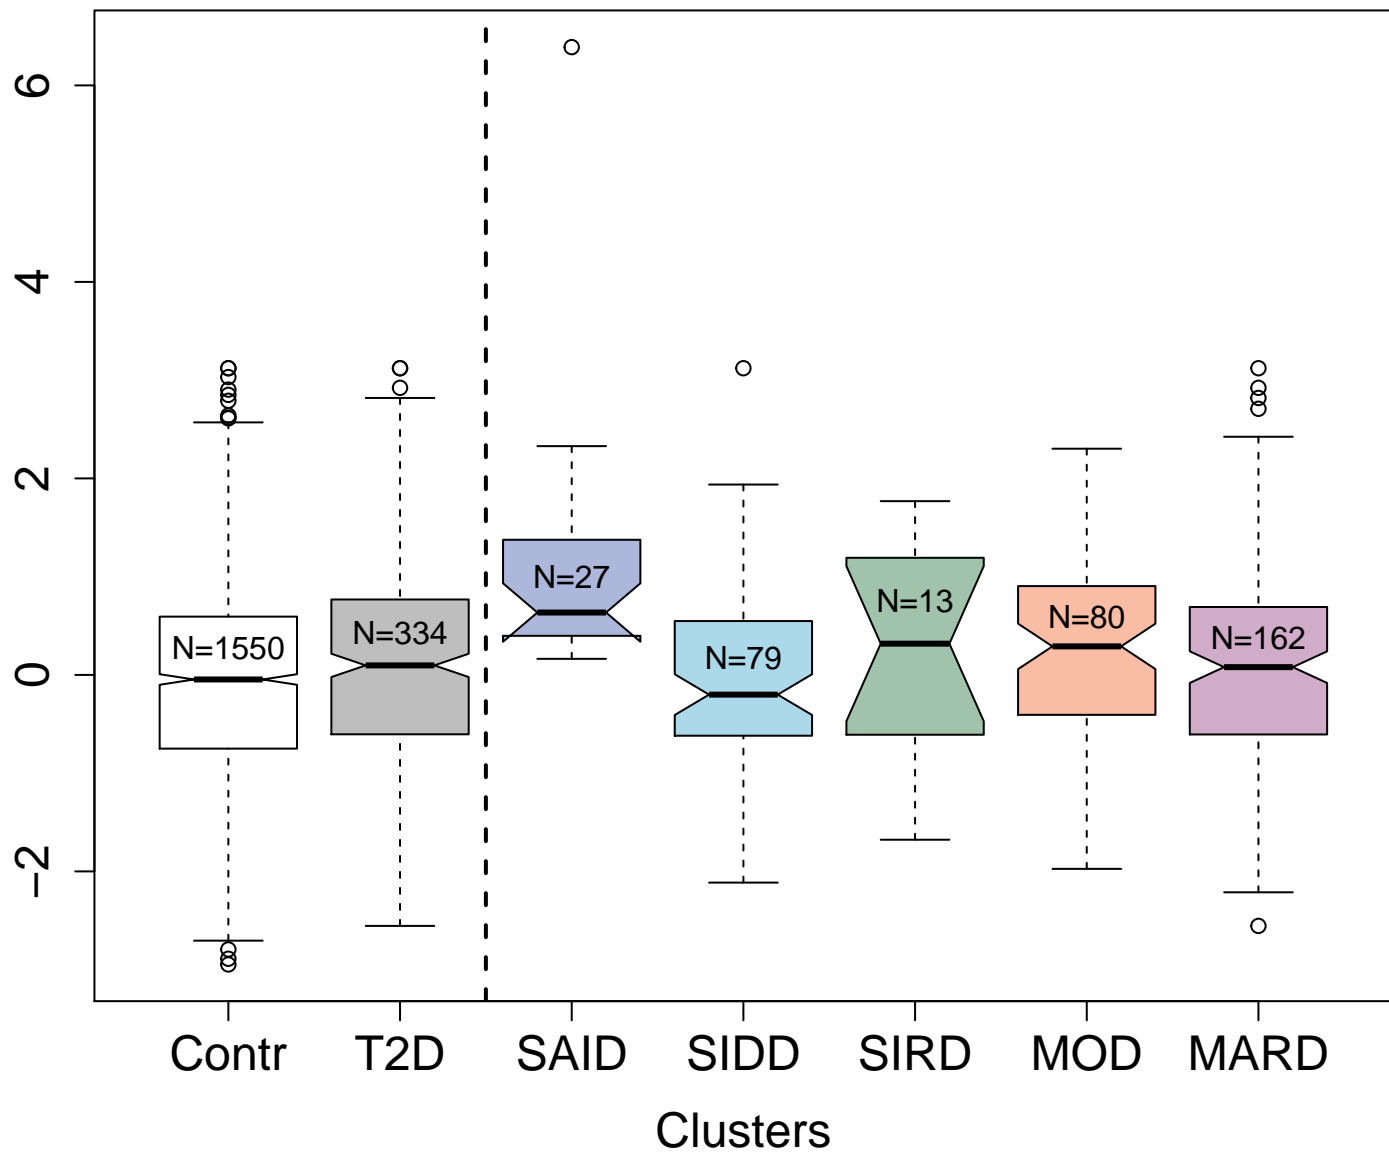

M32418 : myristoleate (14:1n5)

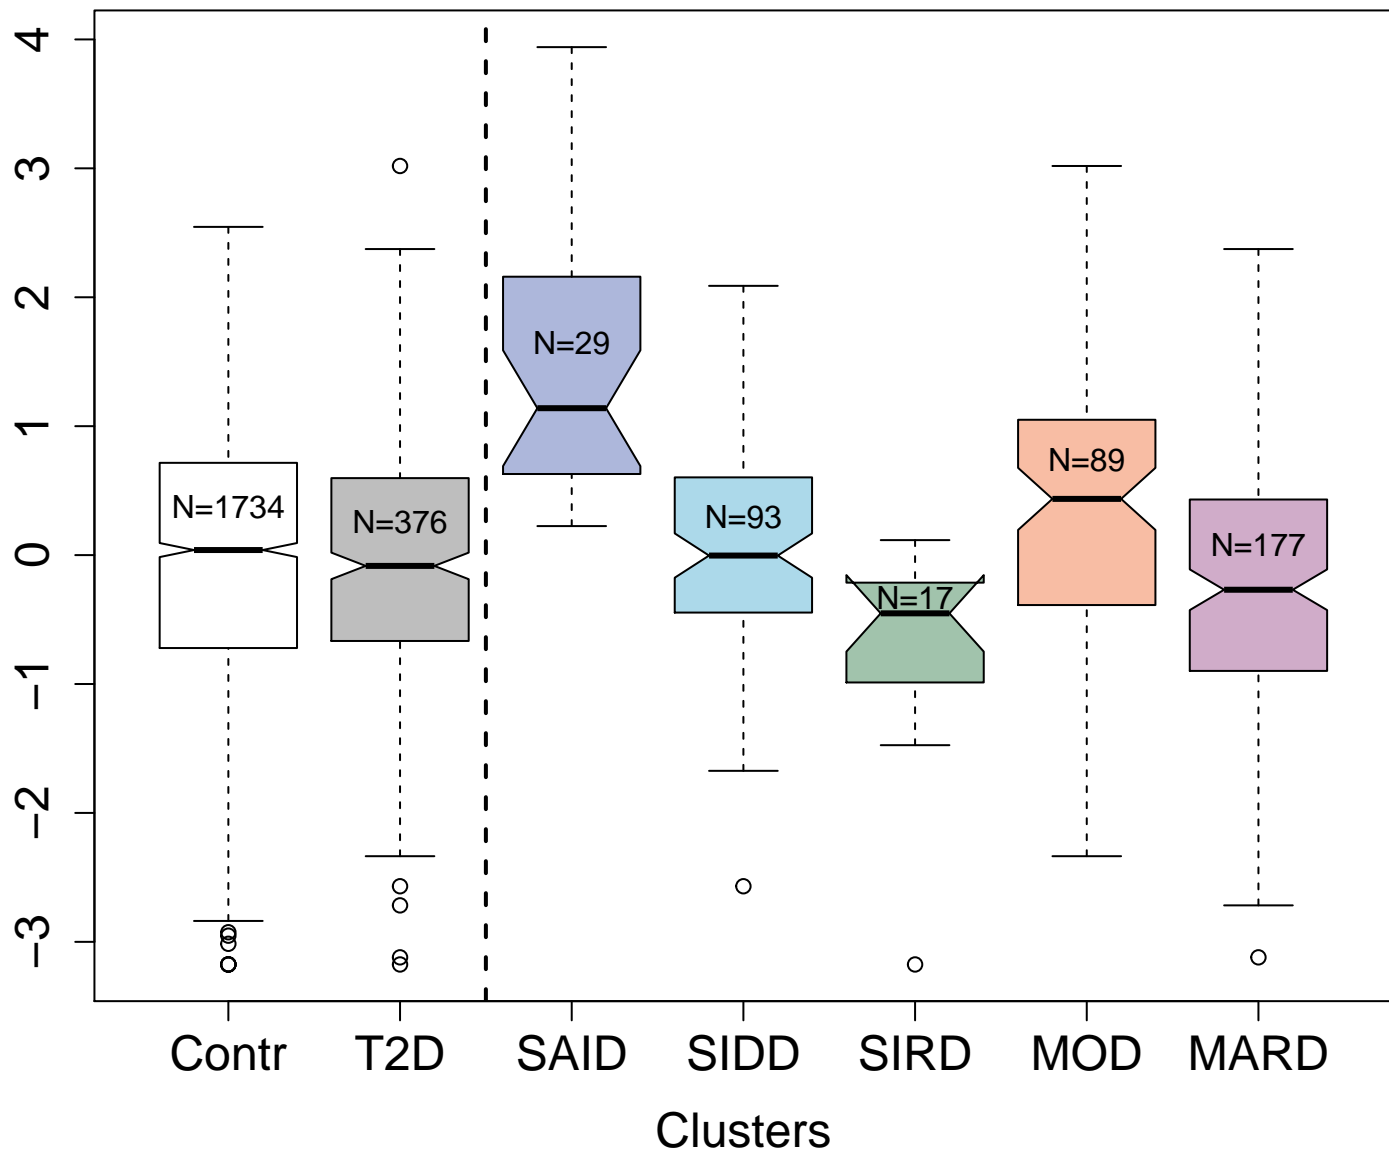

M62850 : tetradecadienoate (14:2)\*

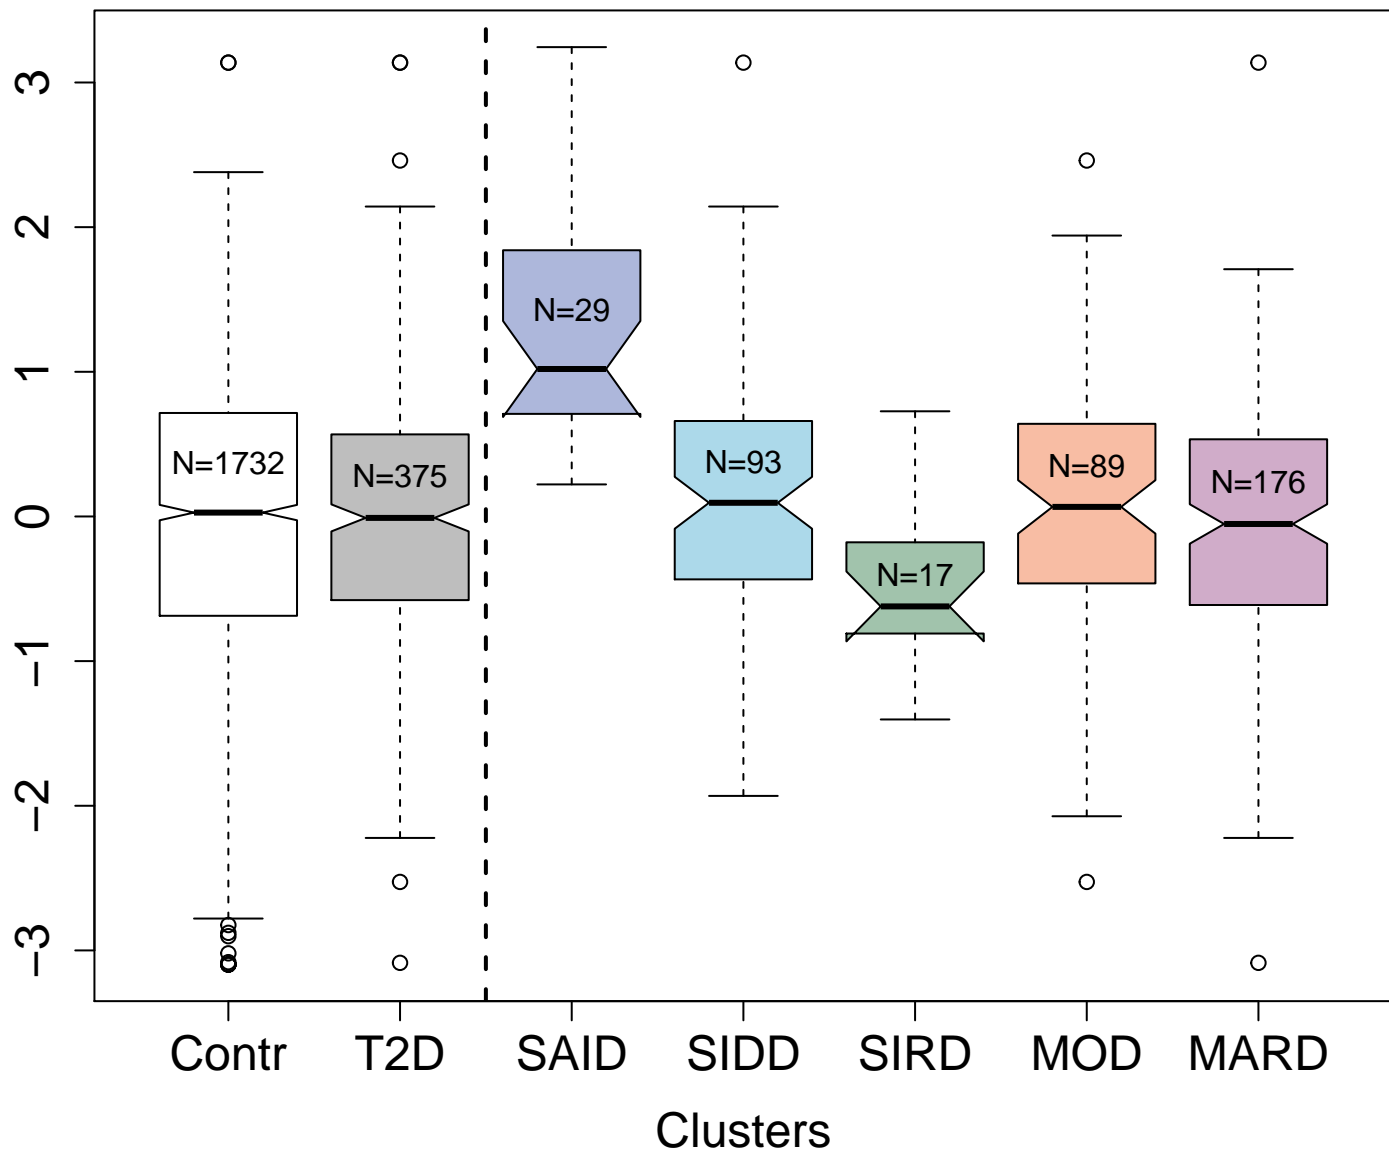

M63357 : 2-hydroxysebacate

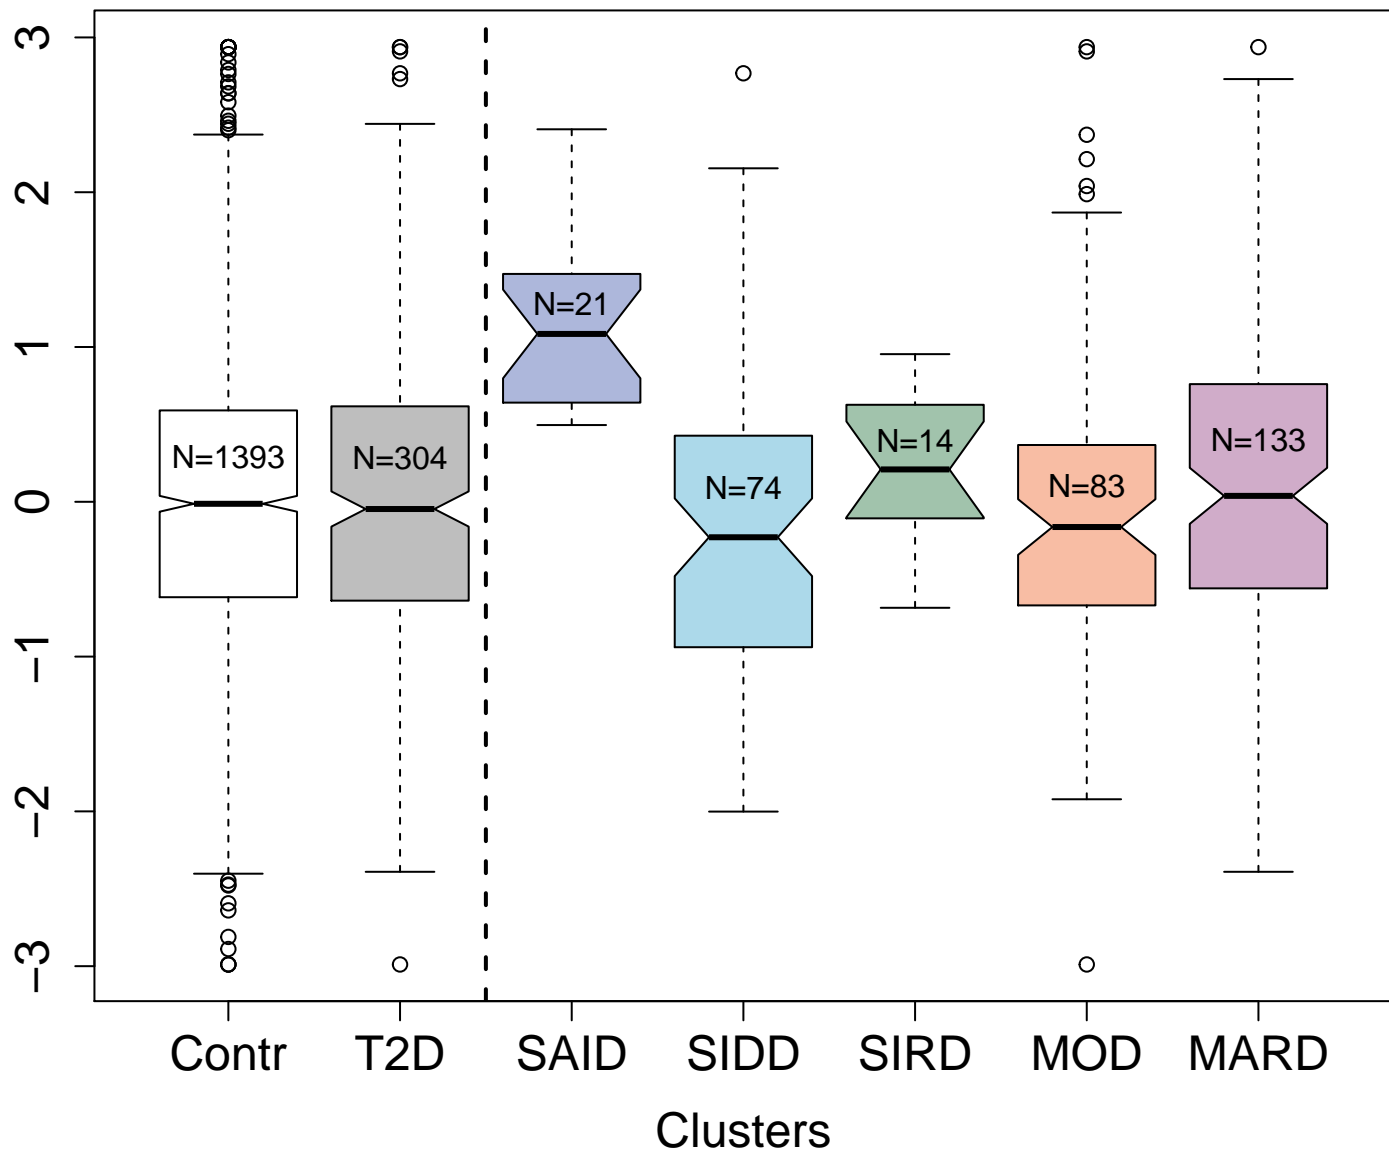

M48418 : 4-methylguaiacol sulfate

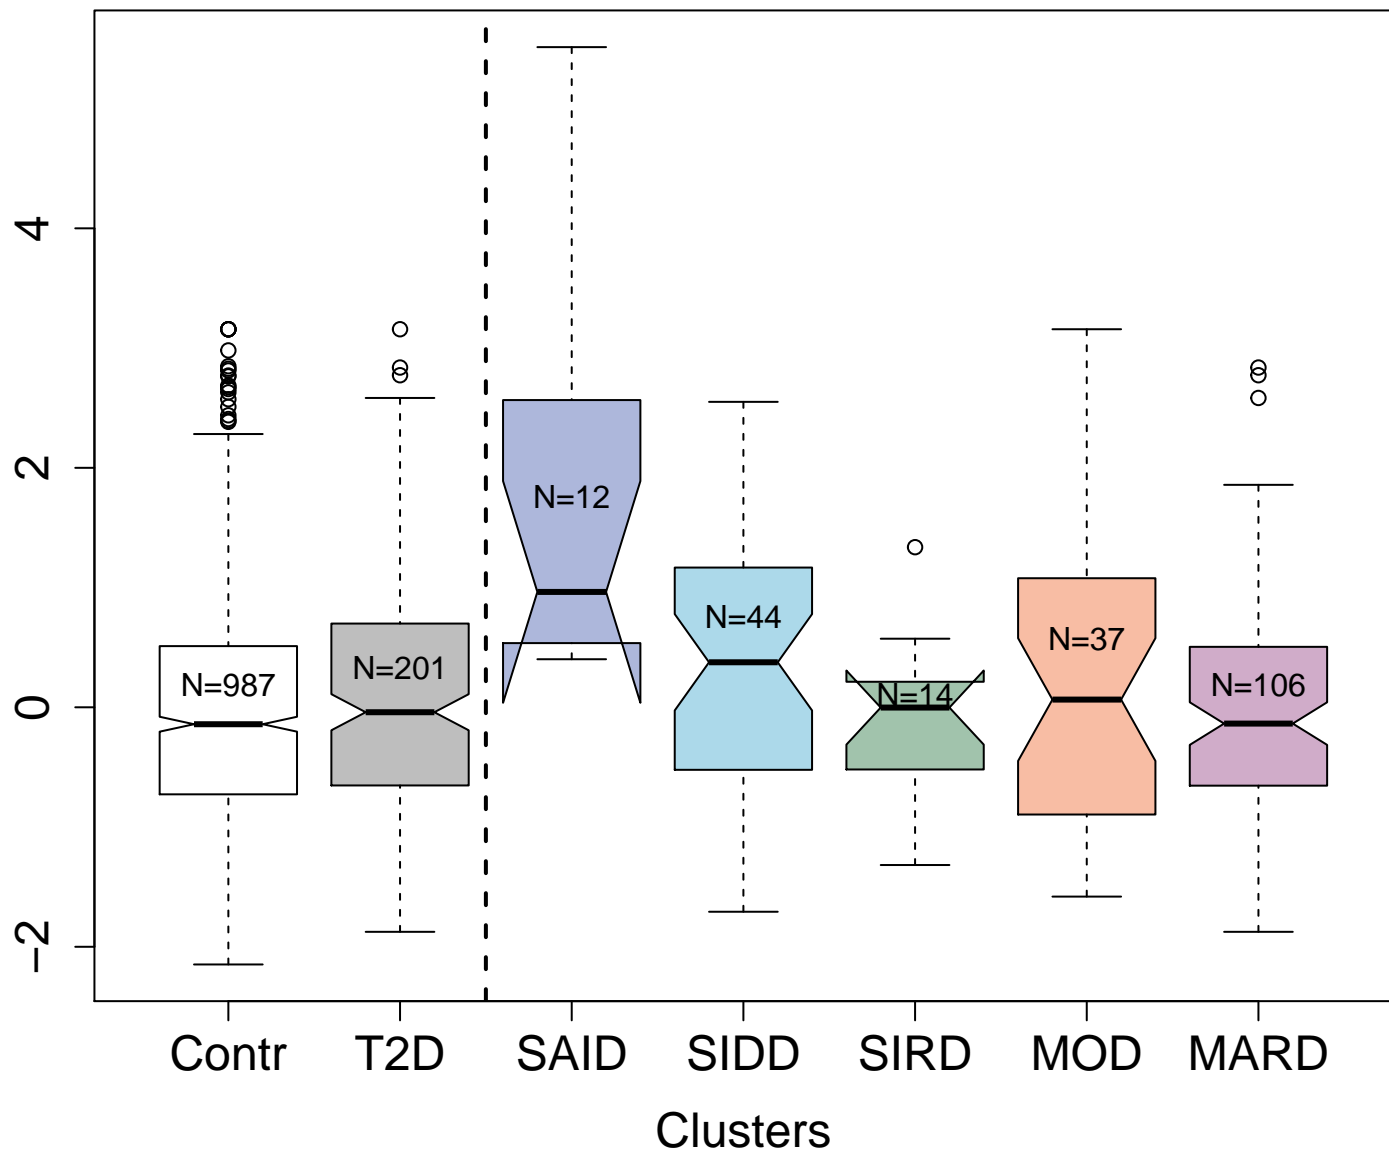

M33173 : 2-hydroxyacetaminophen sulfate\*

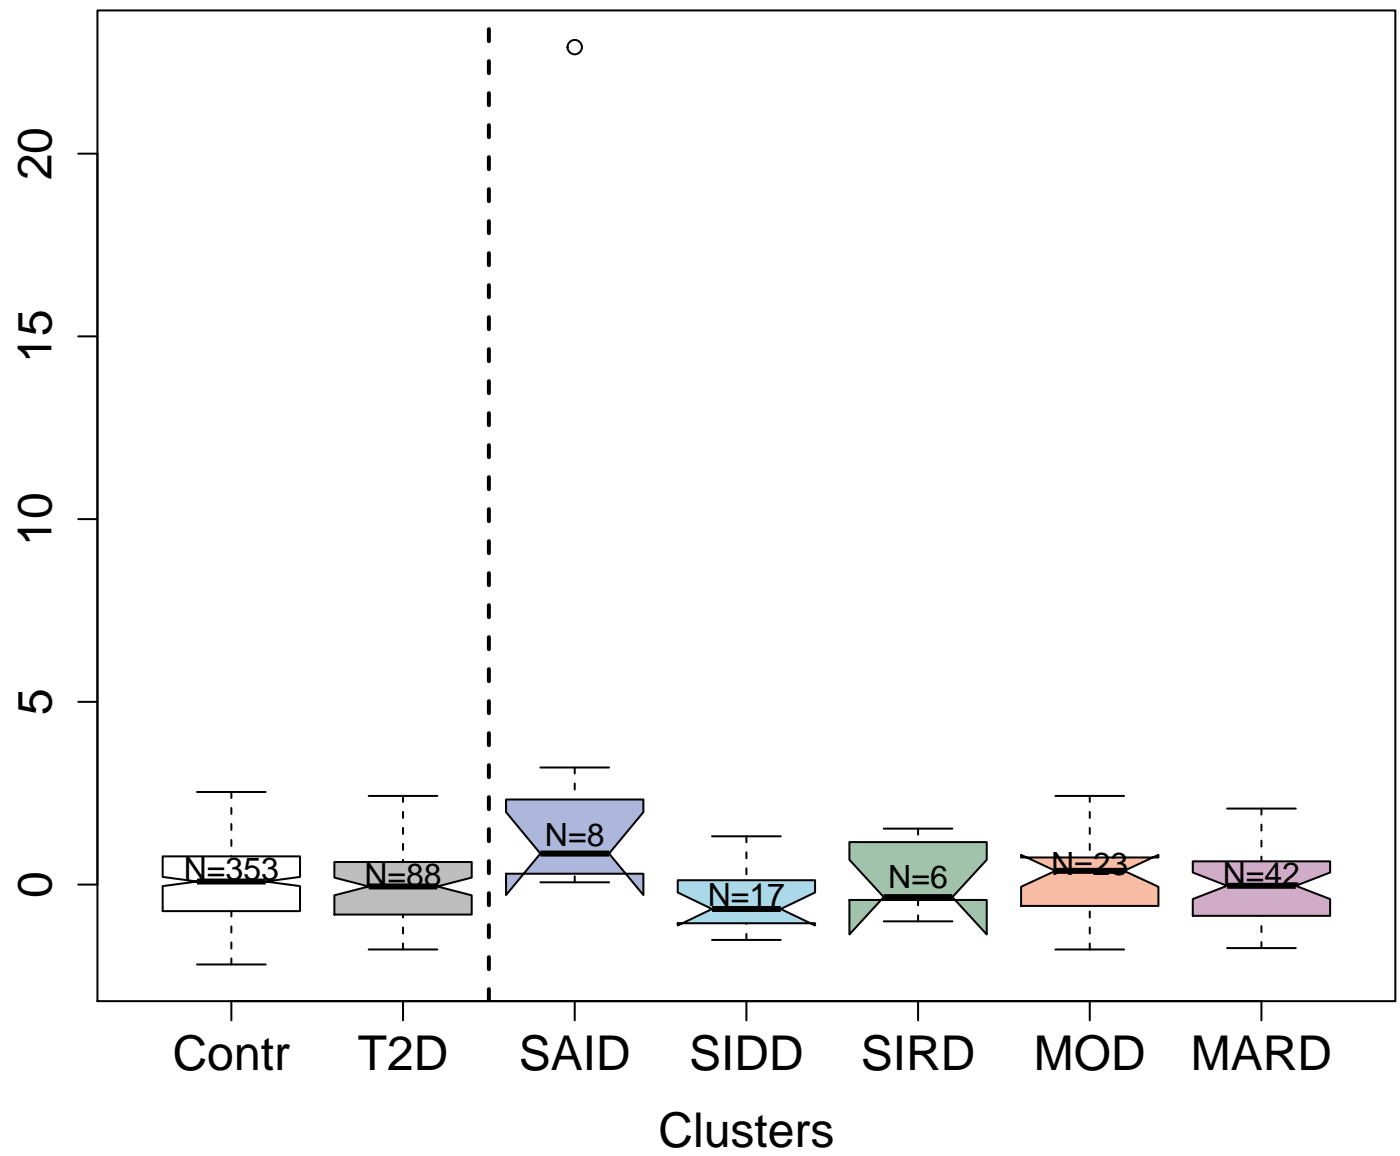



M32504 : docosapentaenoate (n3 DPA; 22:5n3)

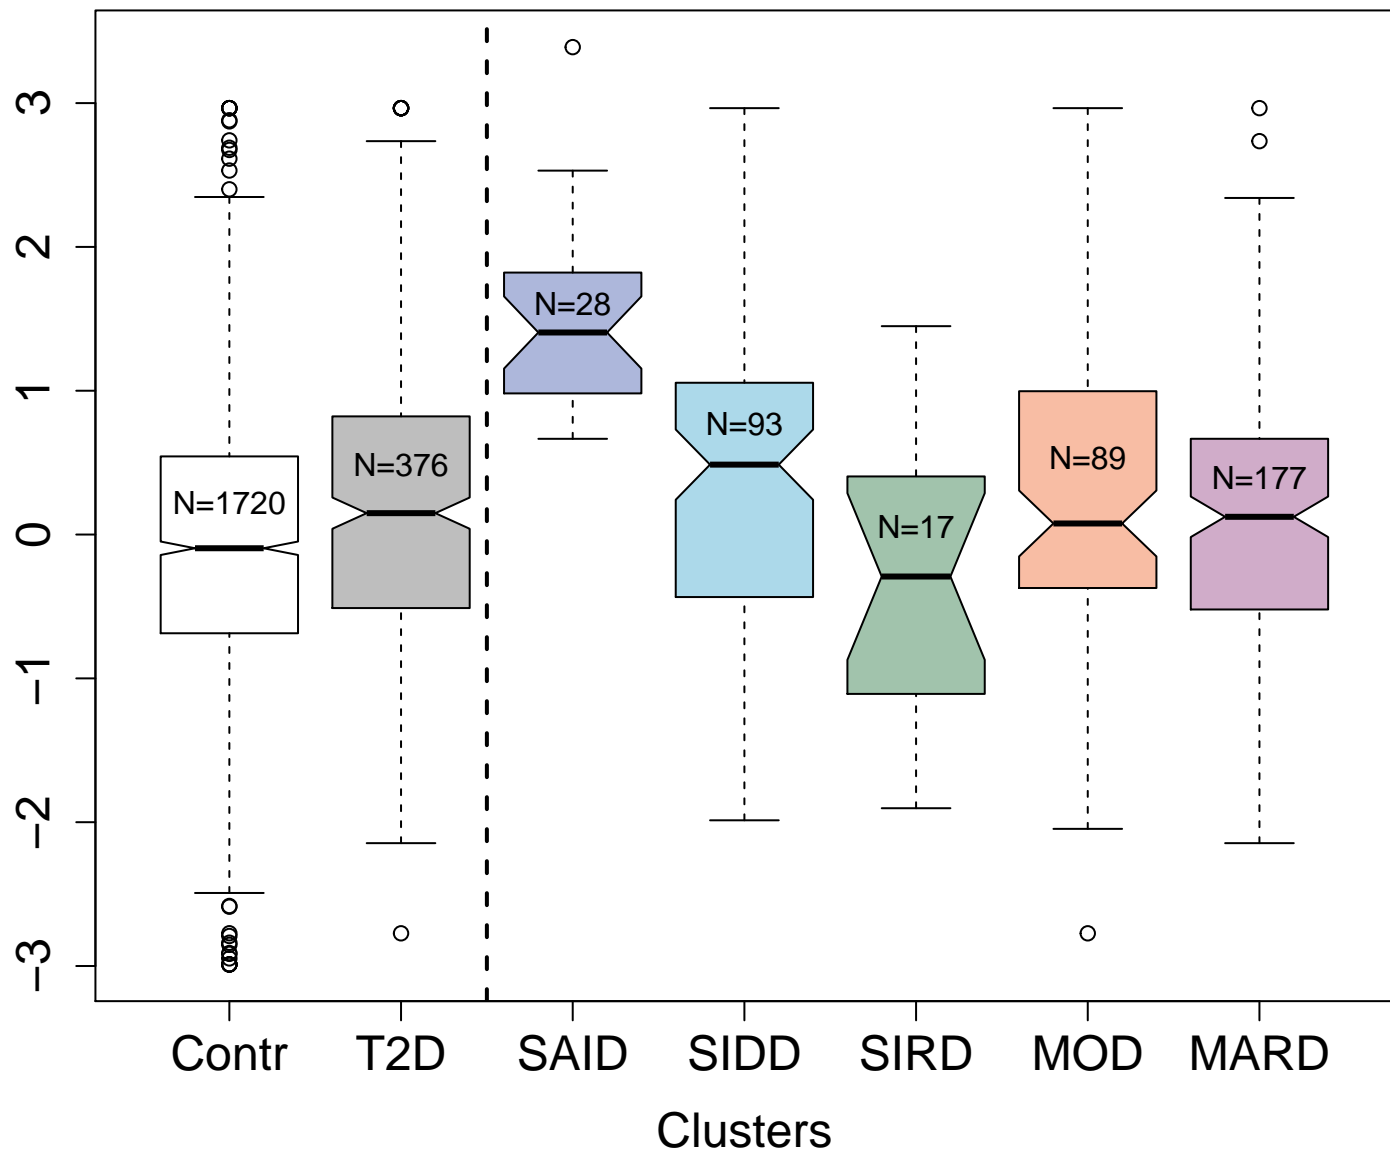

M15650 : N1-methyladenosine

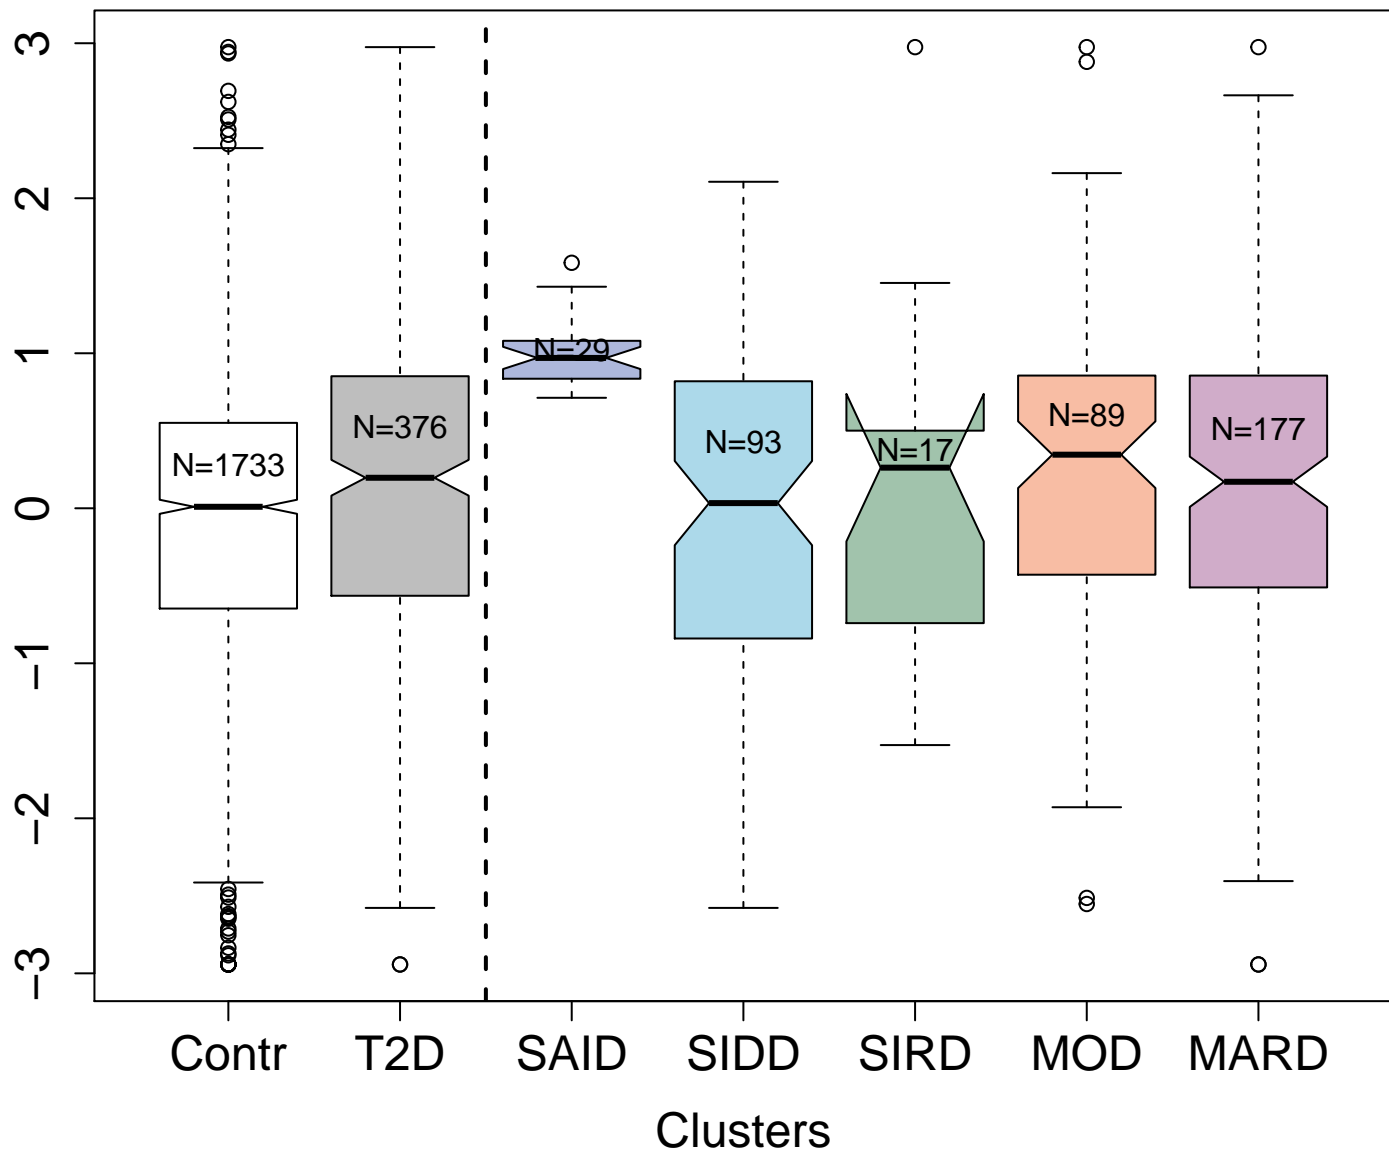

M62954 : N2-acetyl, N6-methyllysine

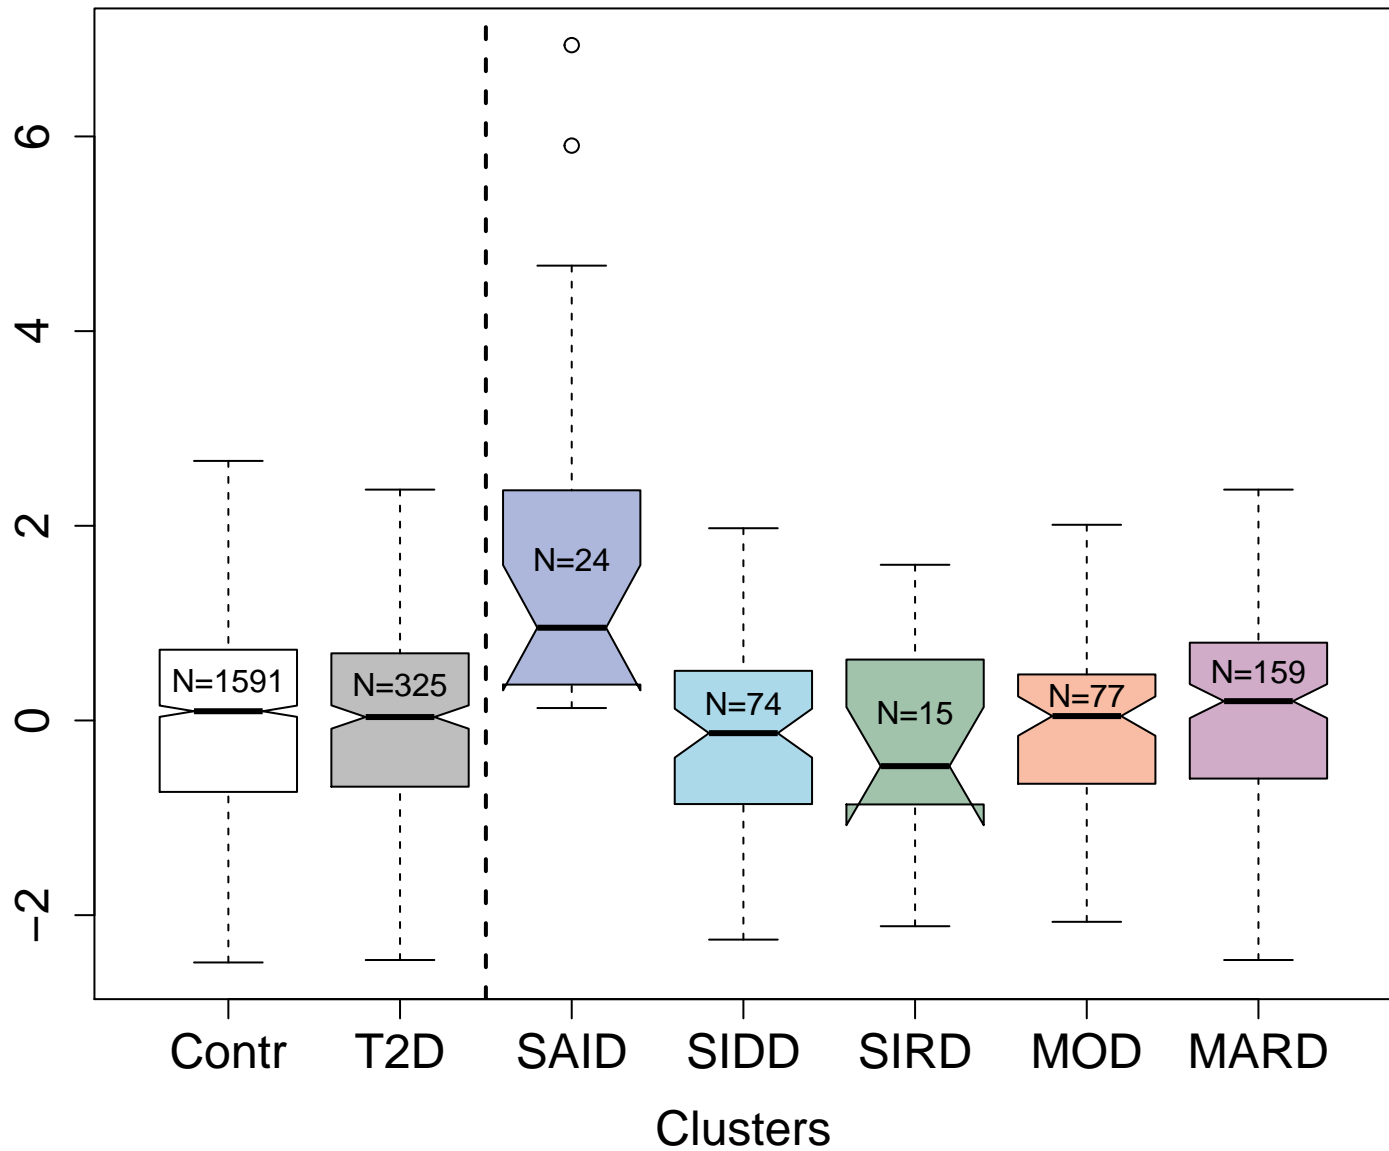

M45404 : N-acetyllalin

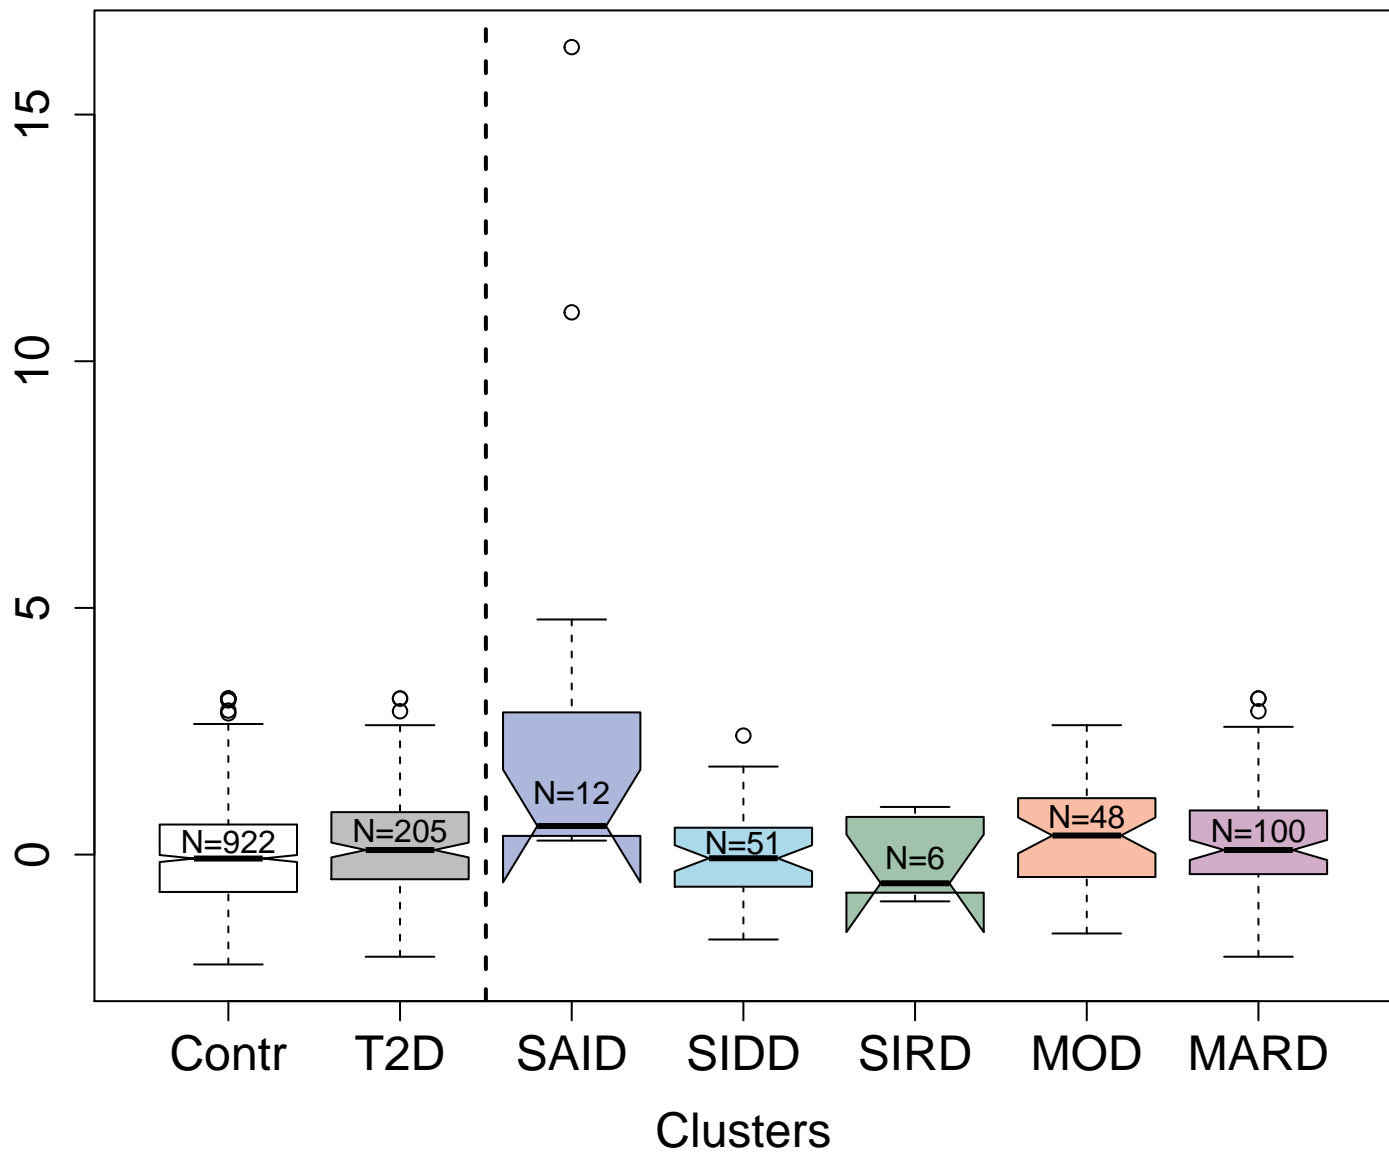

M1558 : 4-acetamidobutanoate

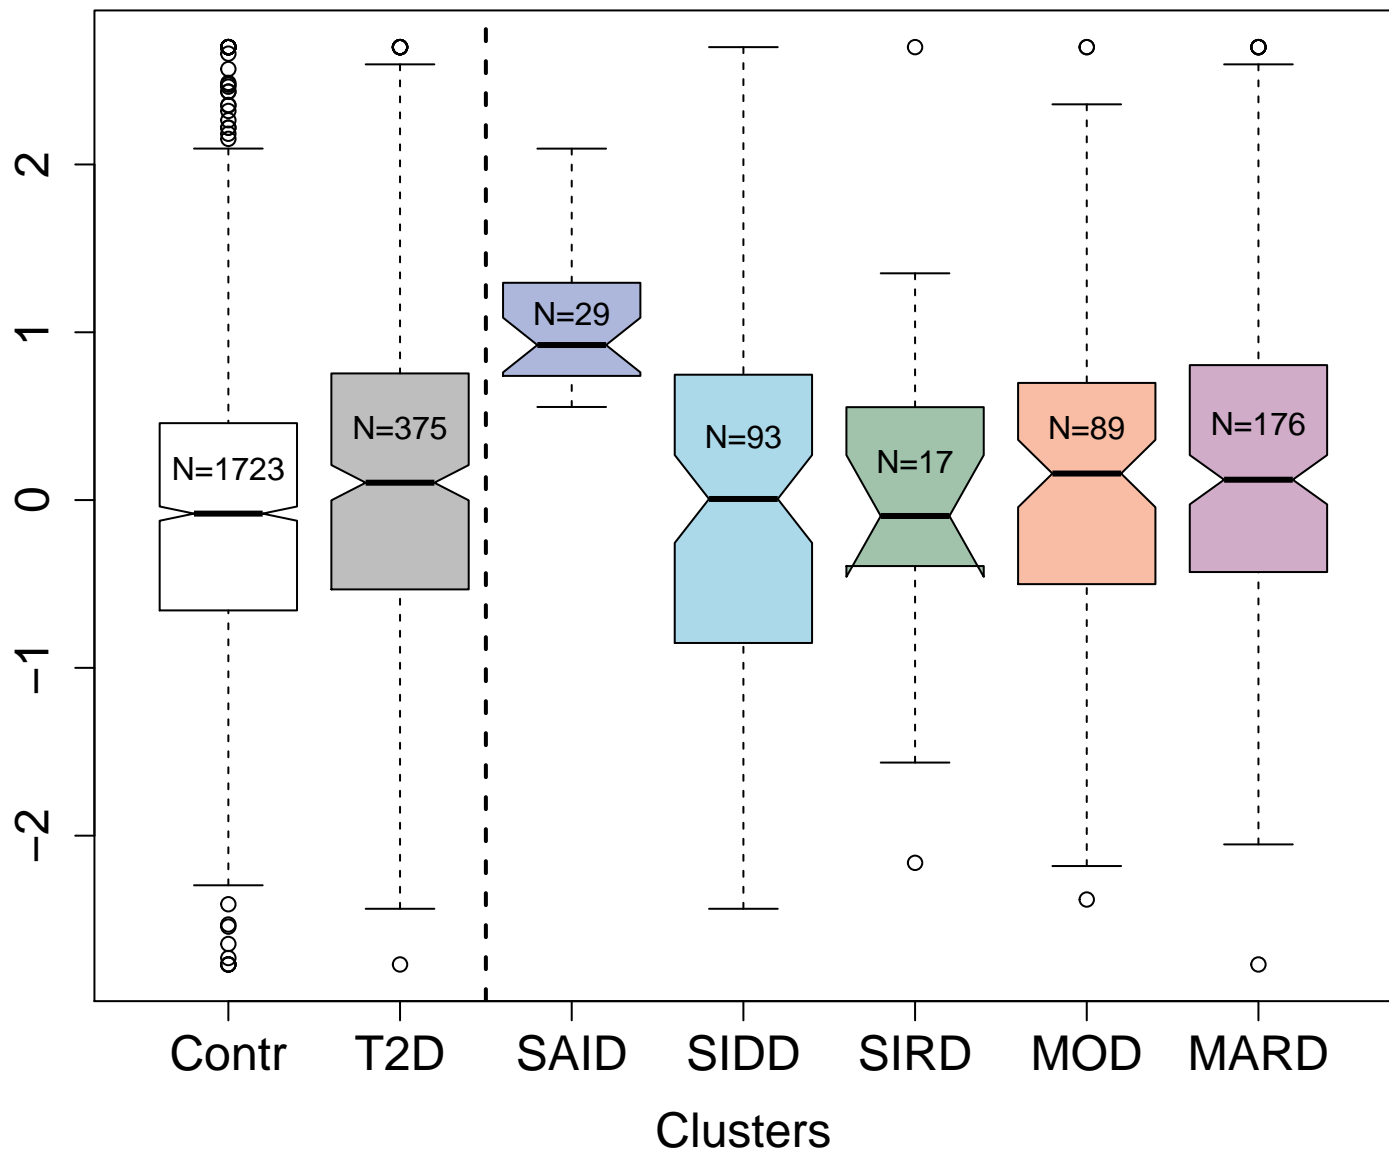

M32346 : glycochenodeoxycholate

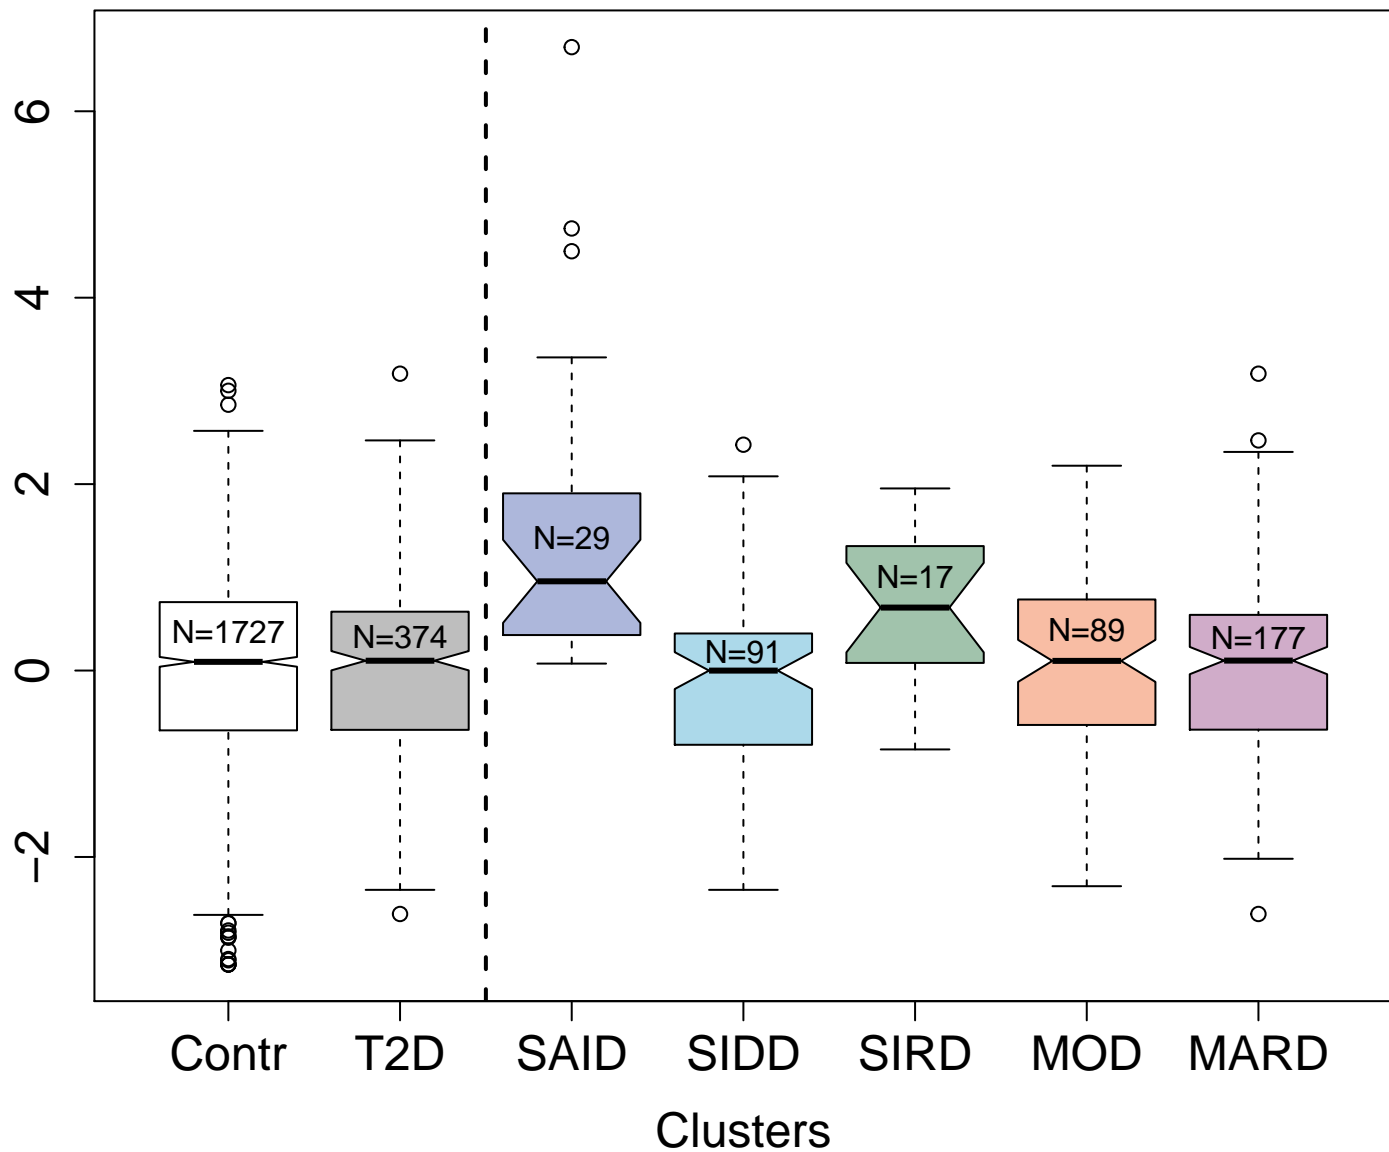

M40703 : polyIglycine

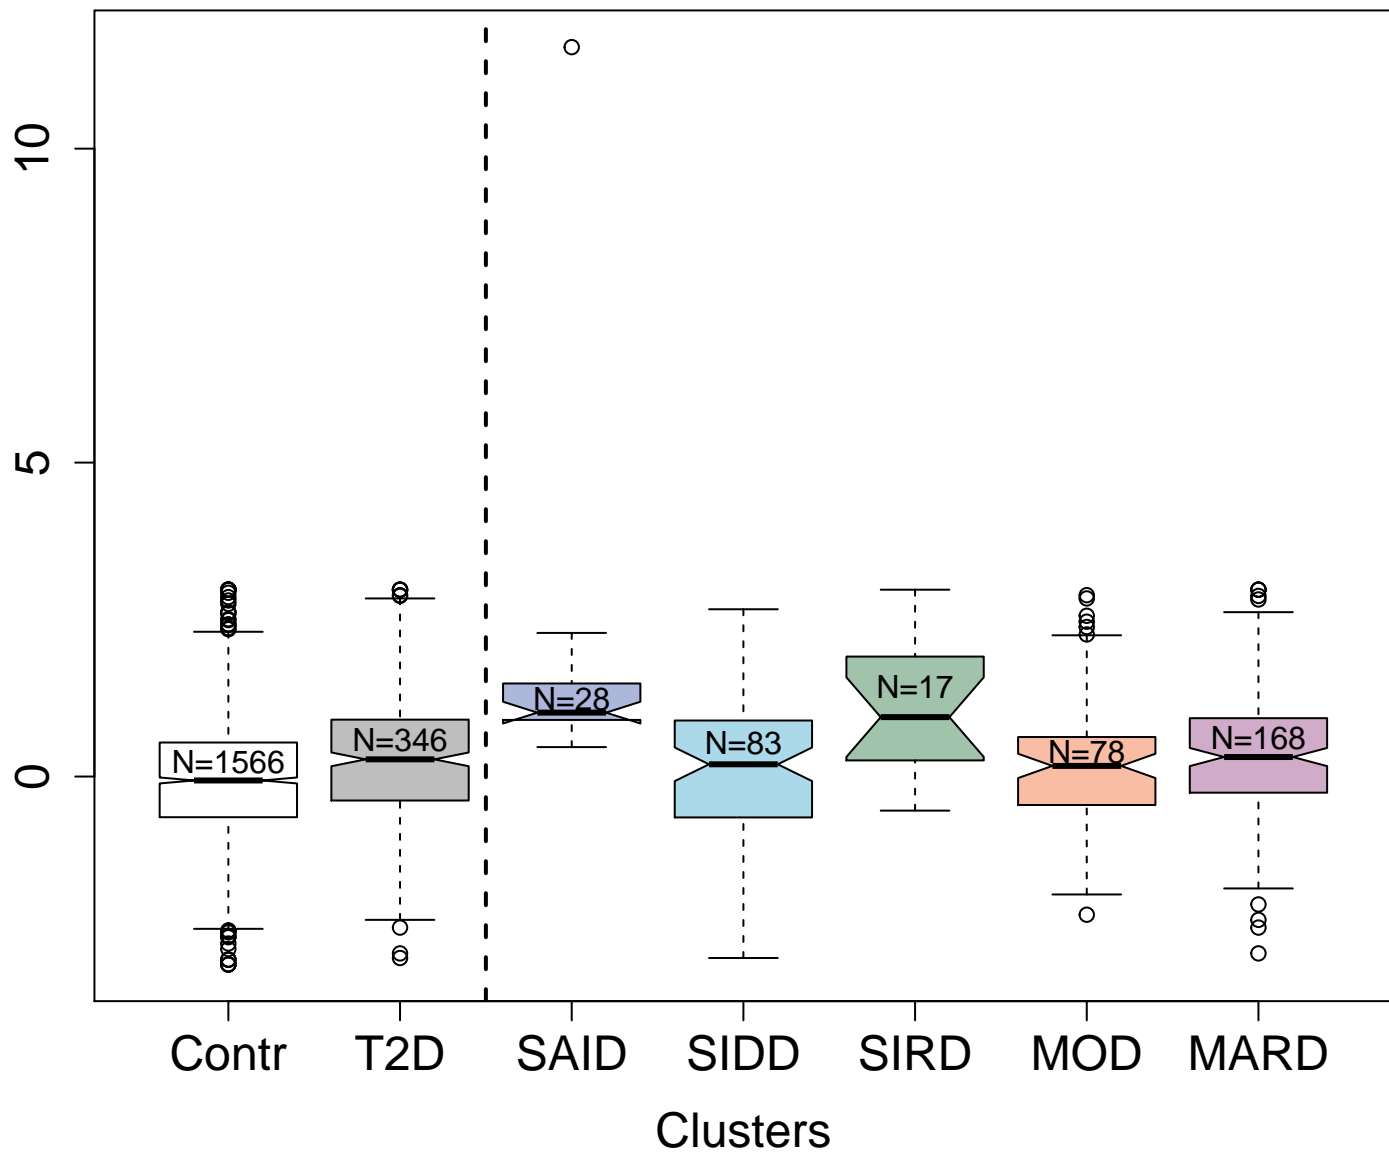

M57652 : hexadecadienoate (16:2n6)

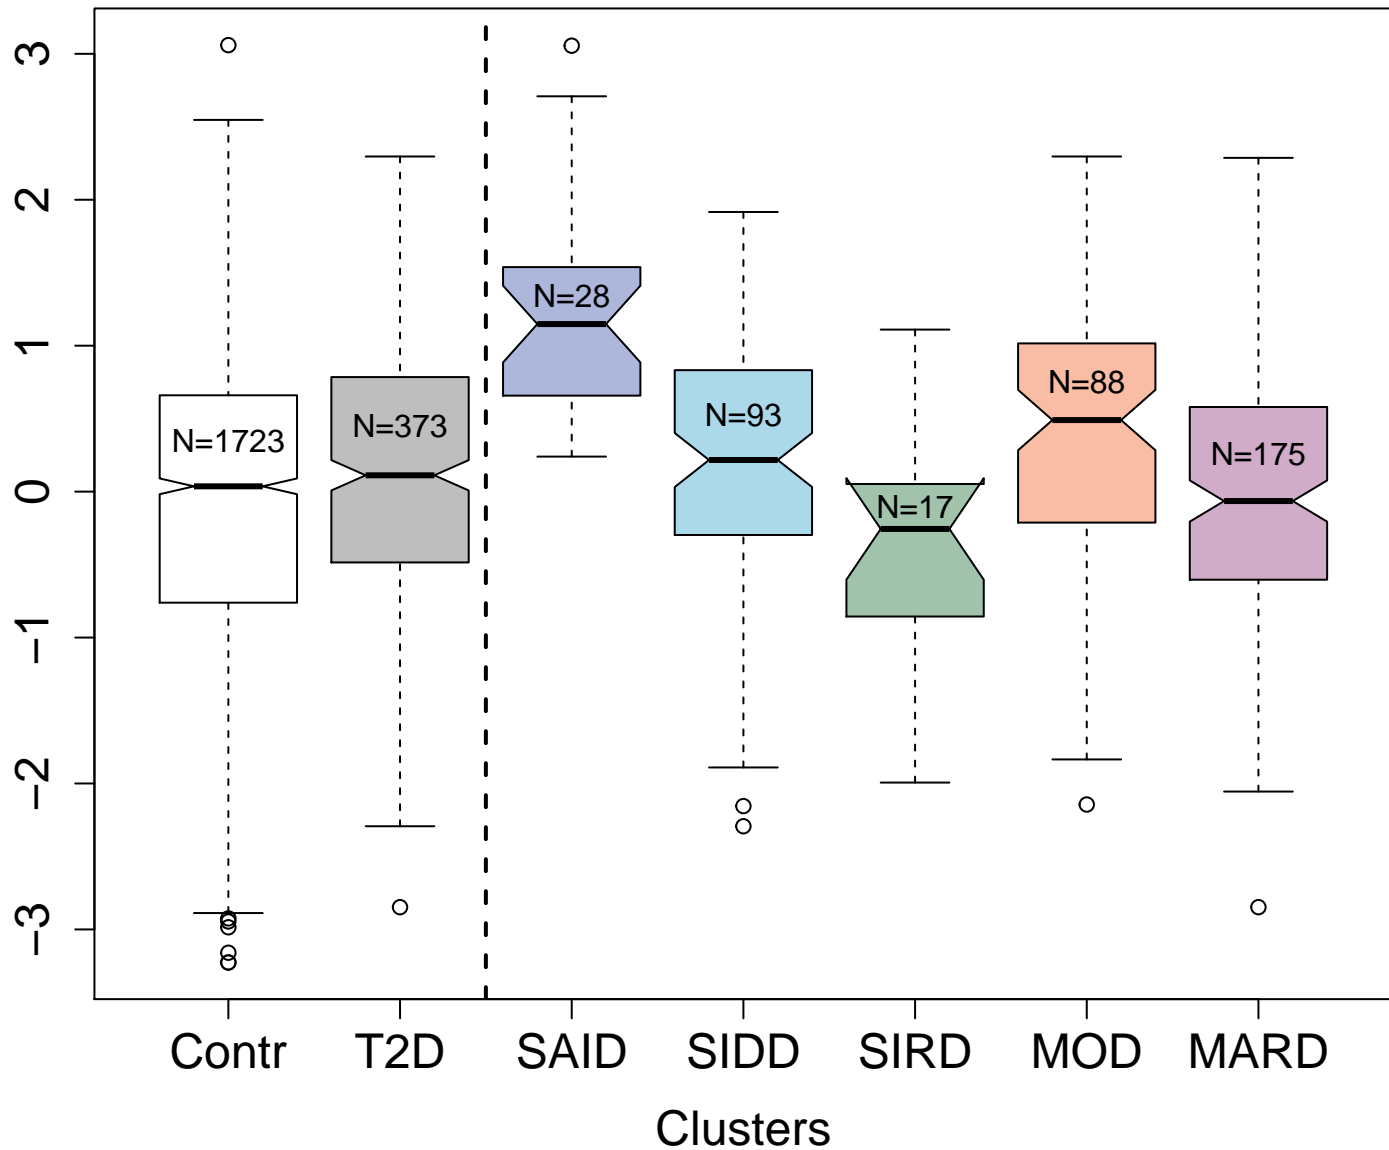



M44878 : methionine sulfone

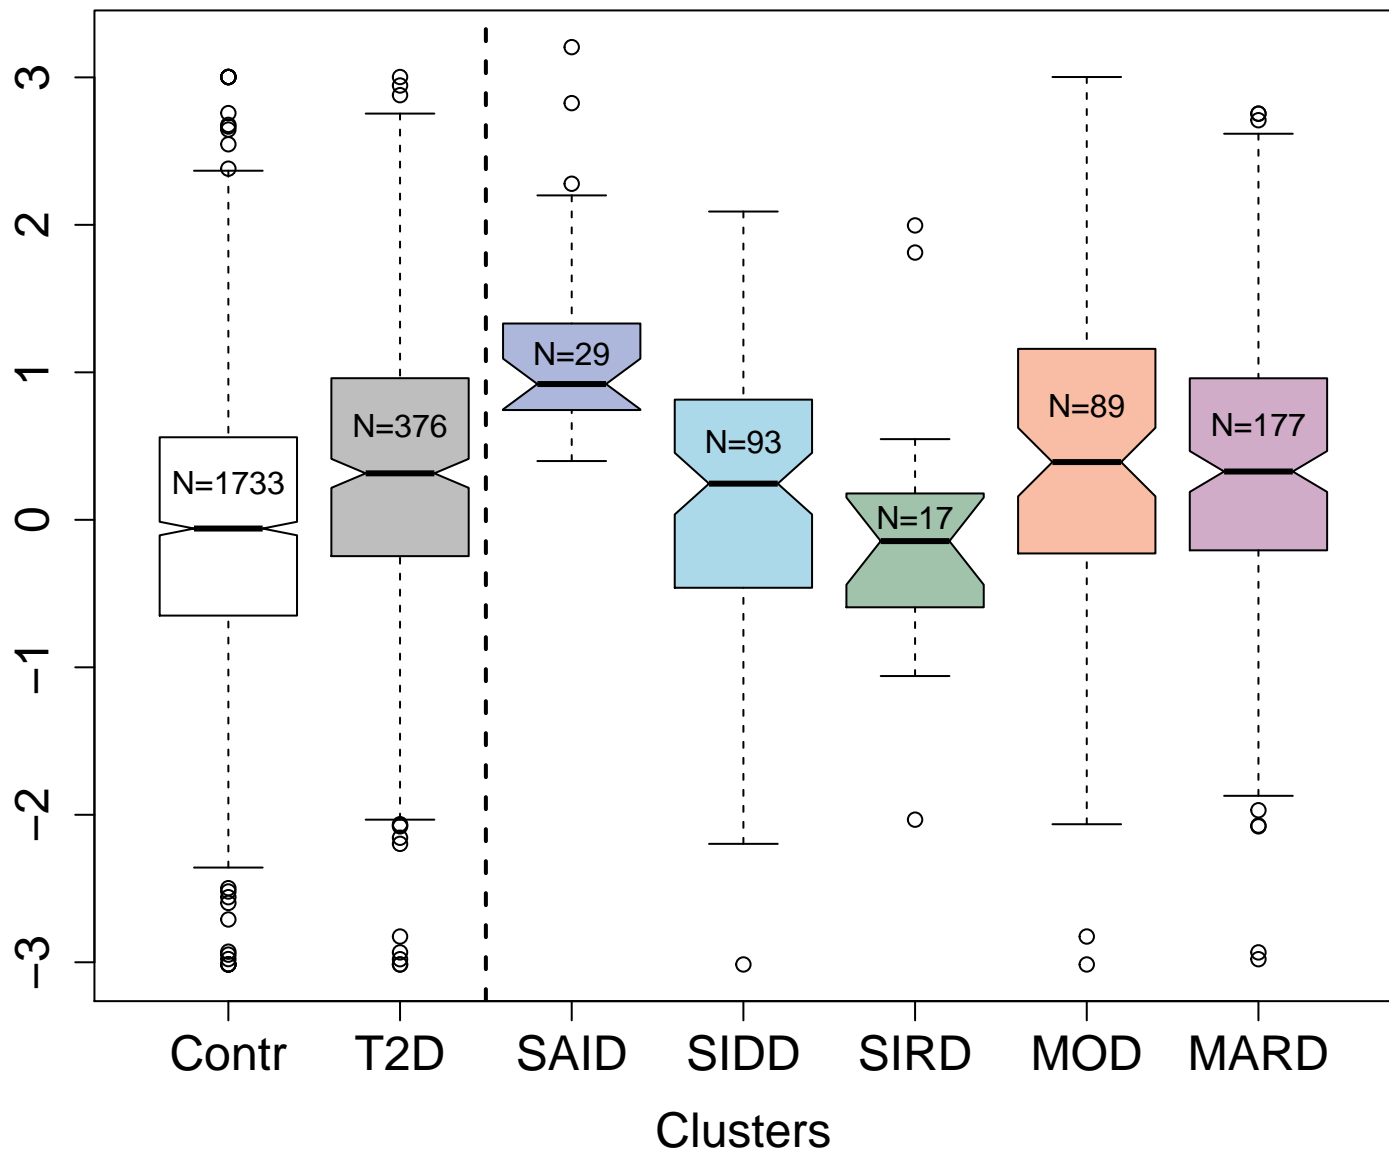

M62967 : X - 25523

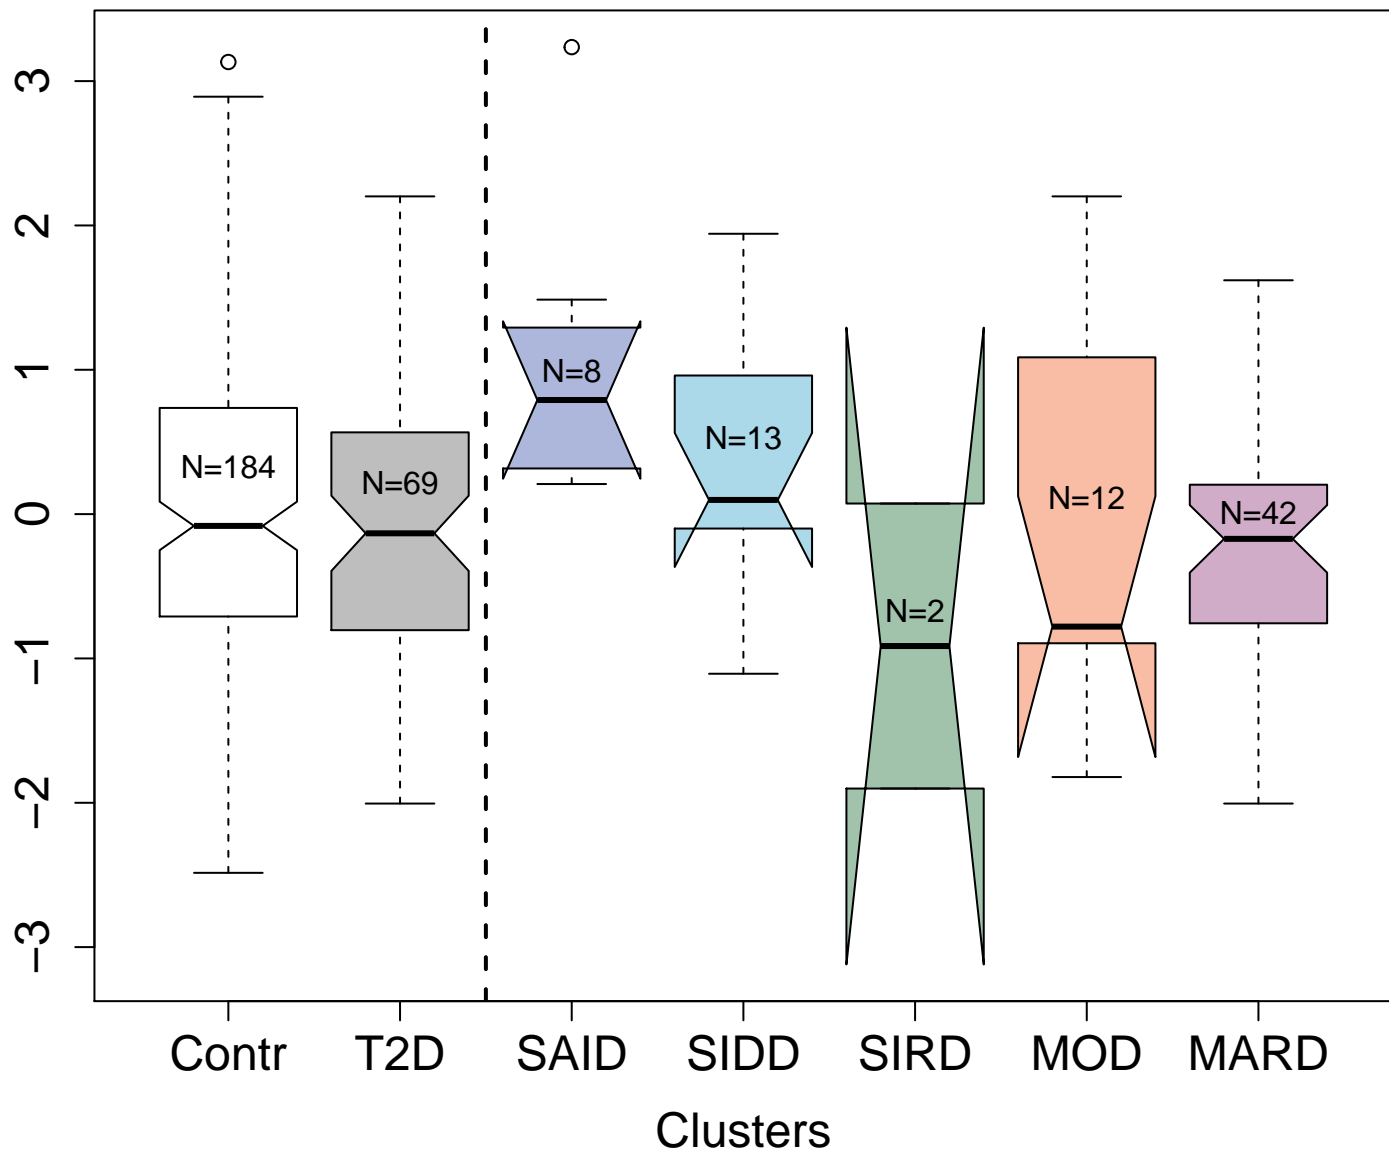

M53266 : X - 24747

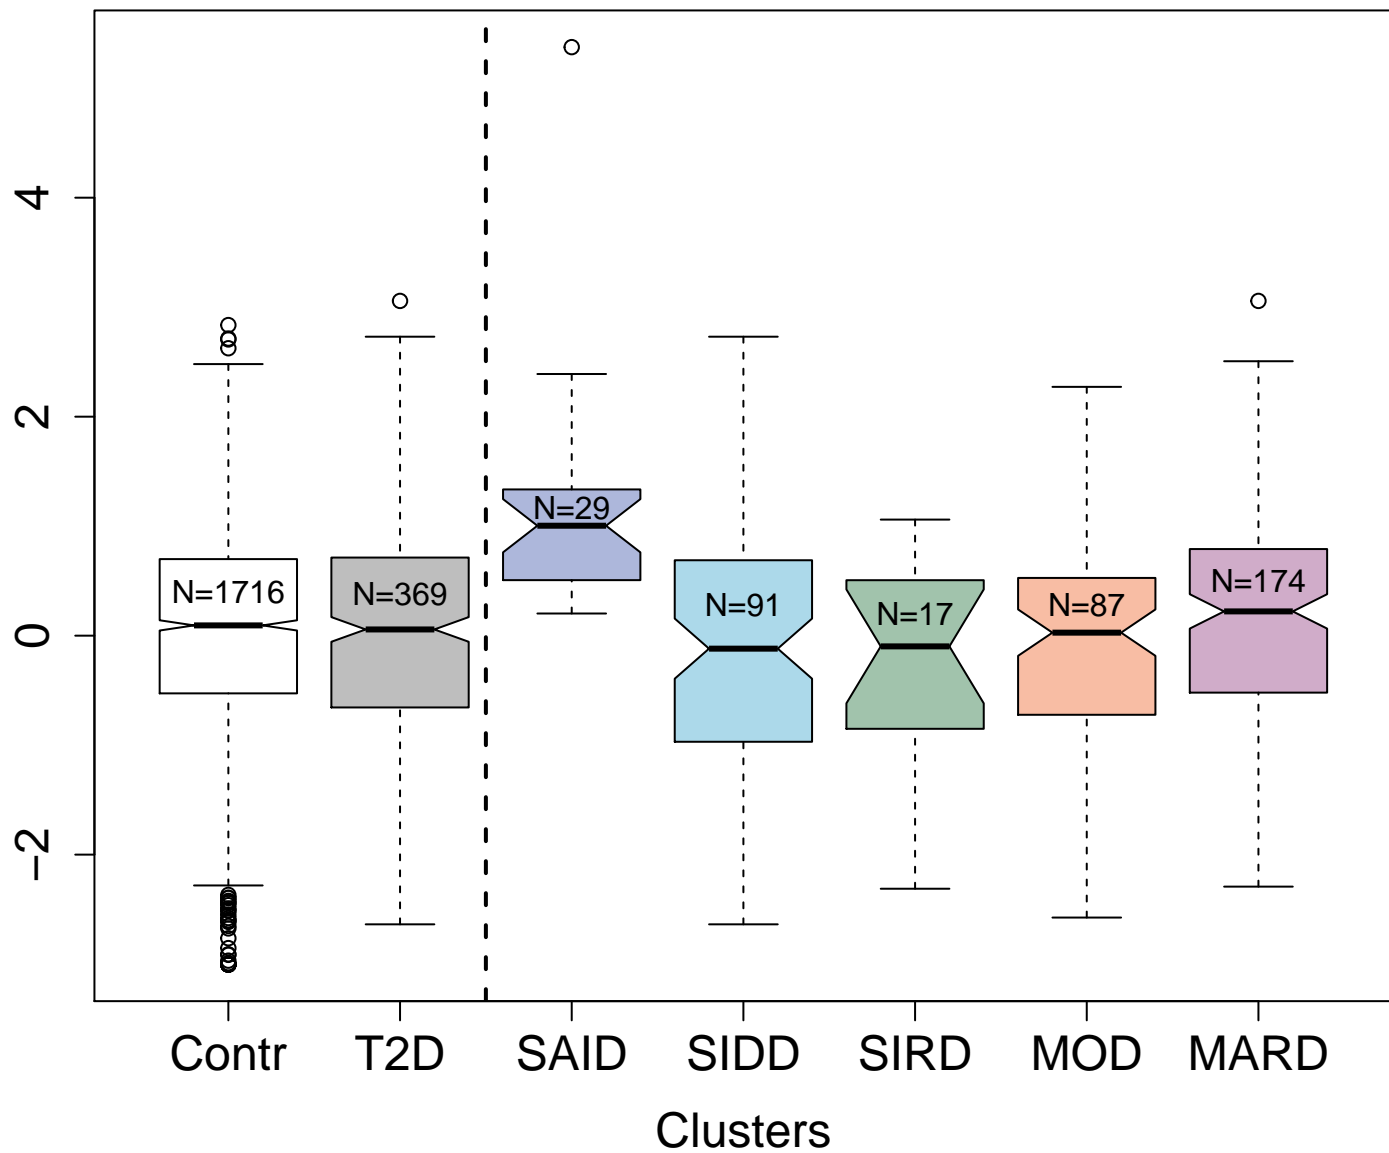

M63841 : dibutyl sulfosuccinate

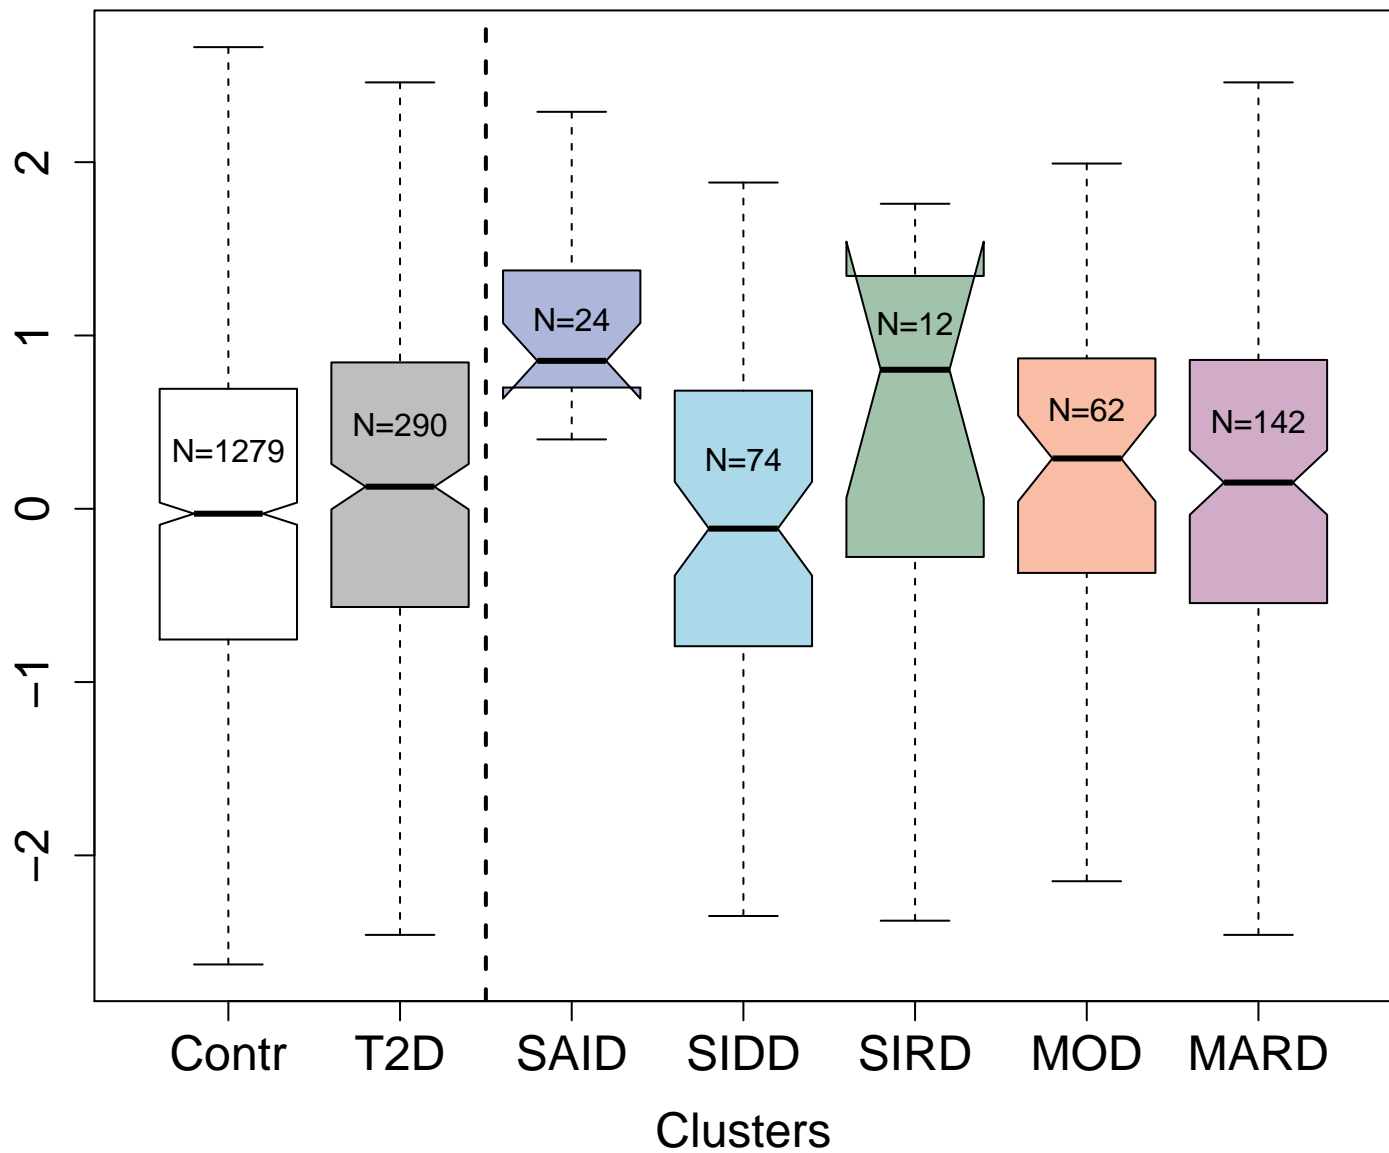

M32350 : 1-methyl-4-imidazoleacetate

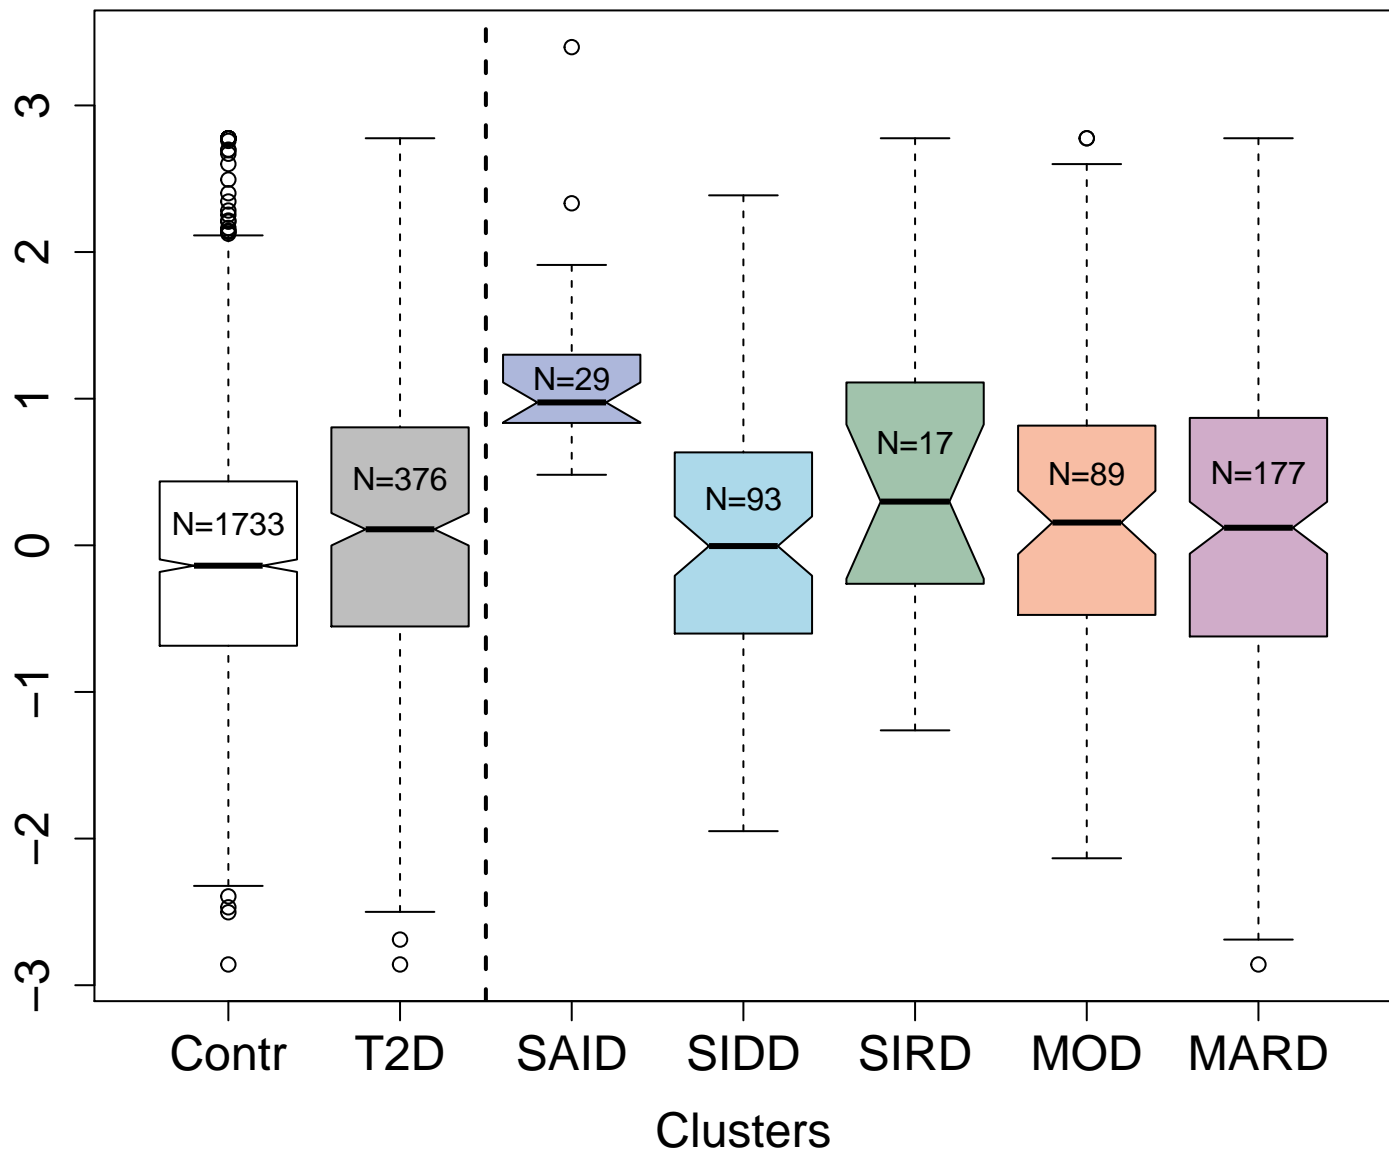

M15772 : ribitol

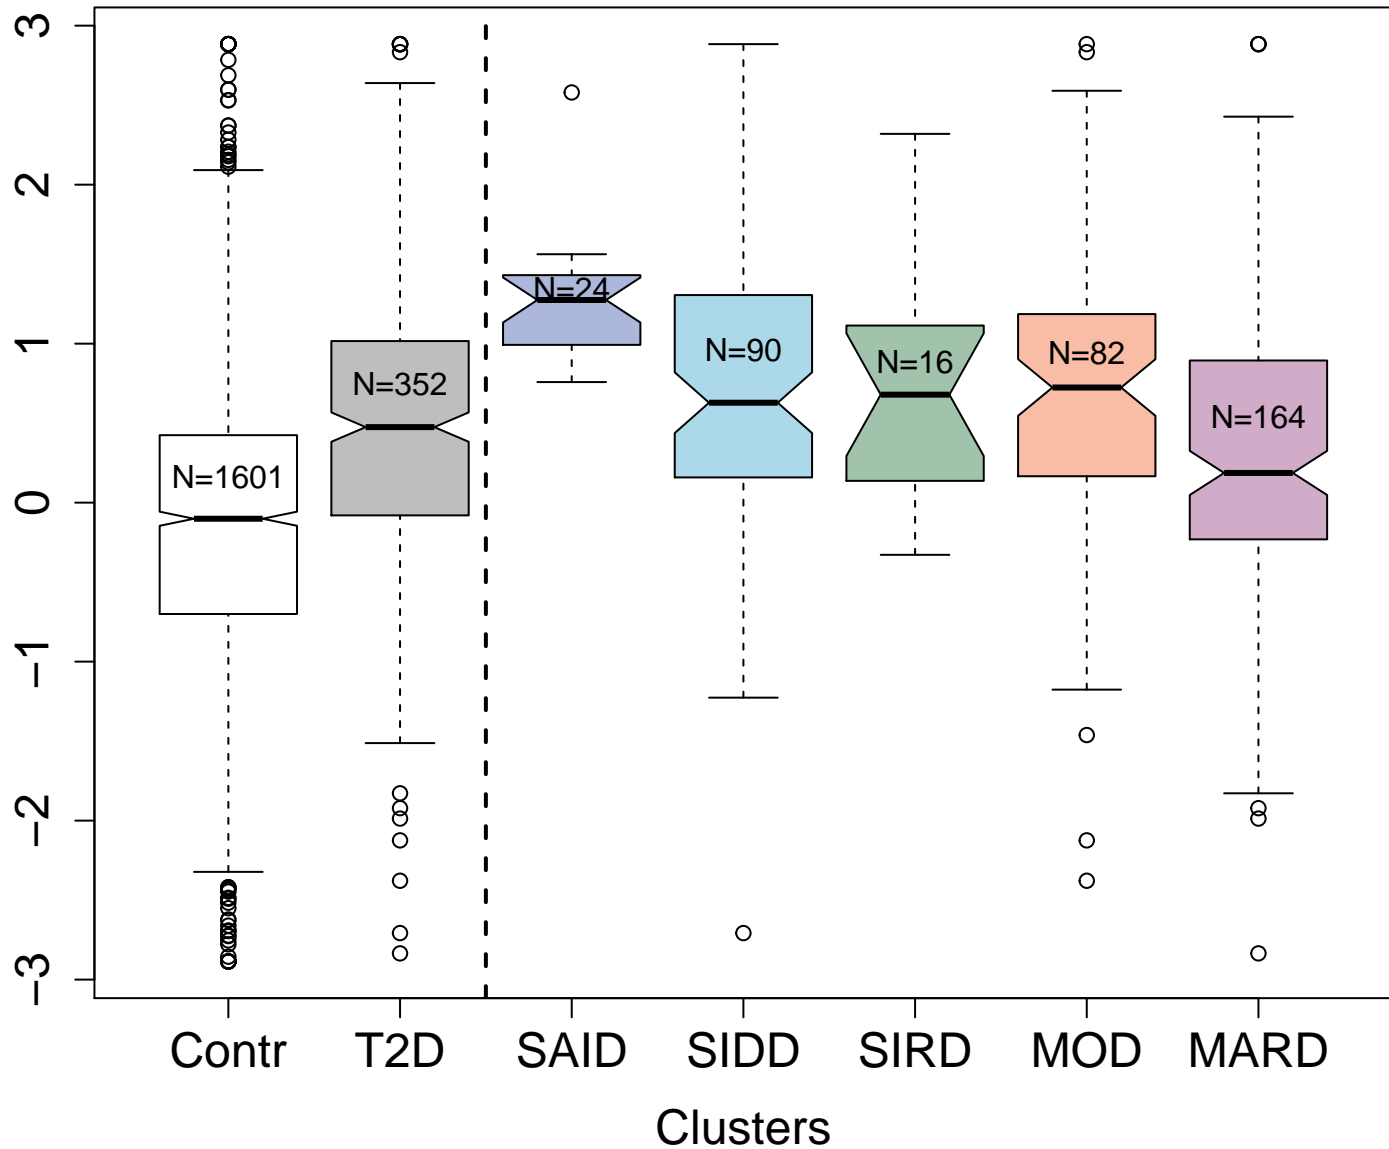

M62952 : 3,4-dihydroxybutyrate

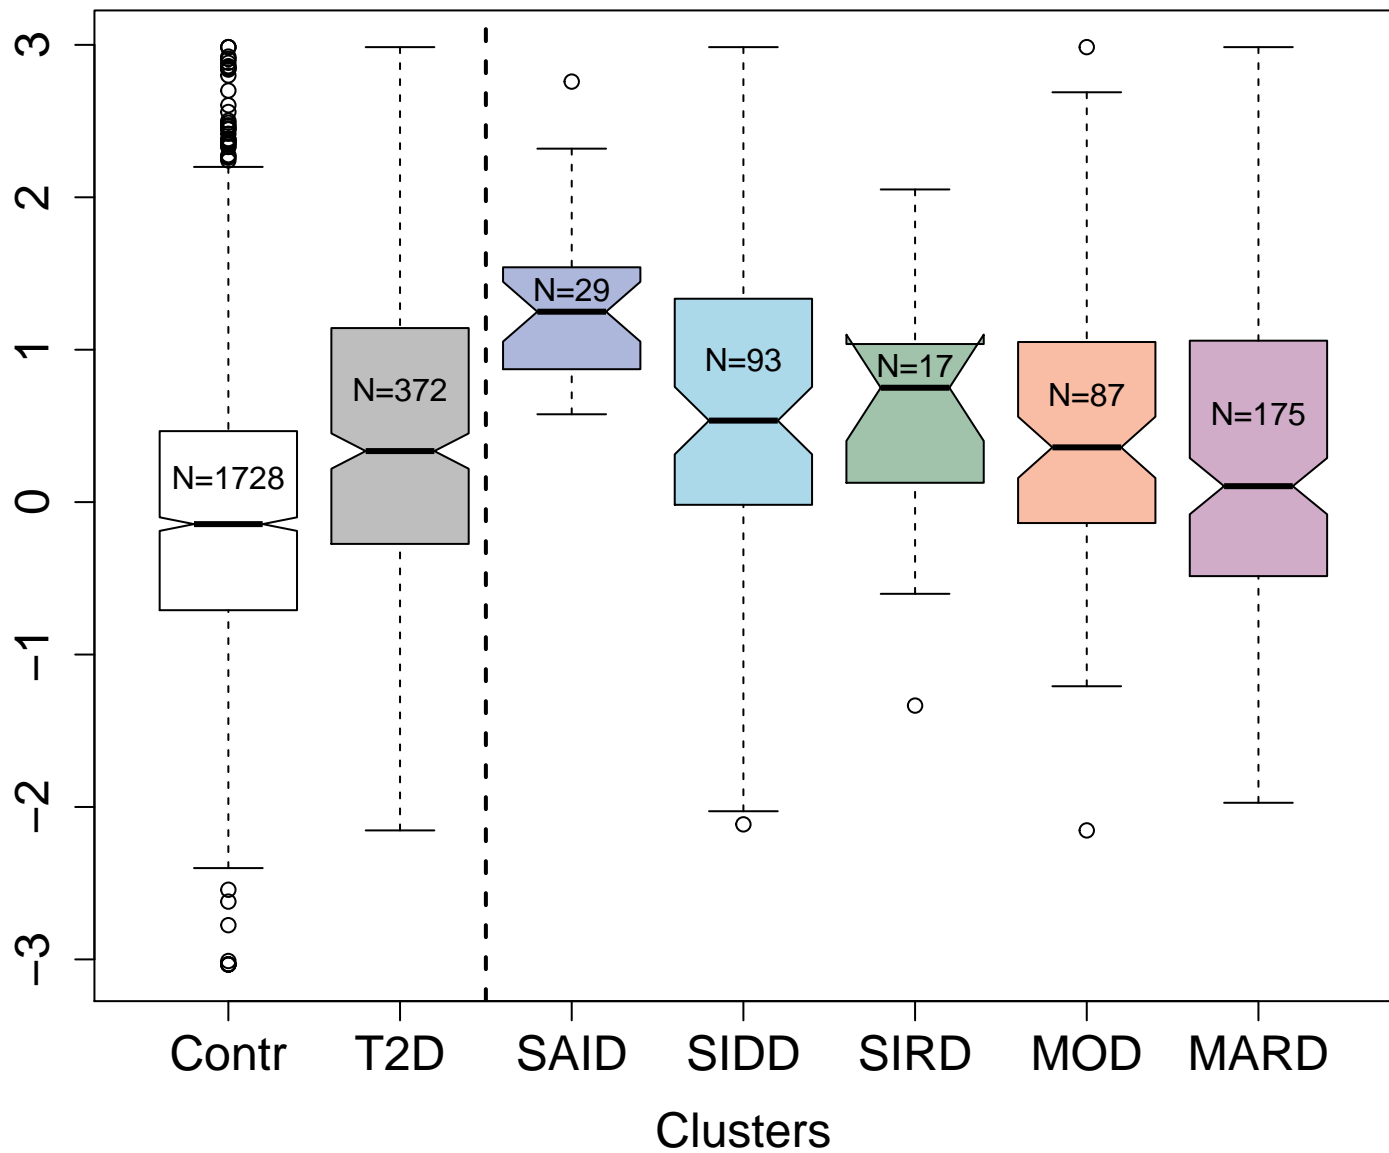

M1643 : fumarate

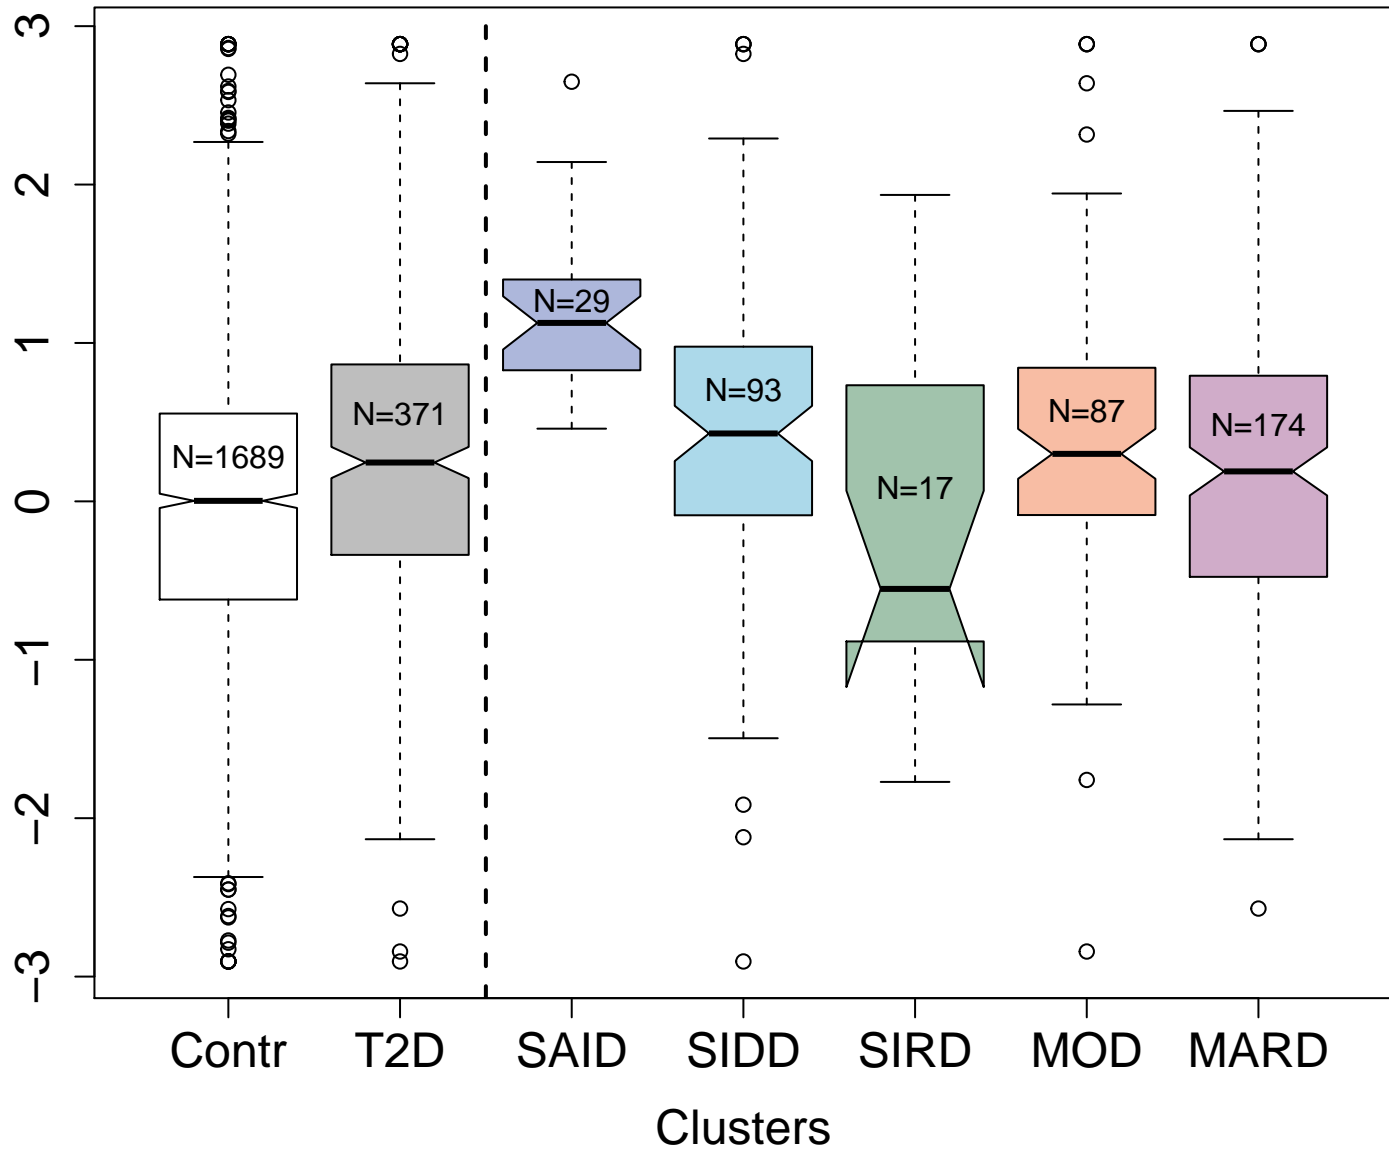



M53195 : 1-myristoyl-2-arachidonoyl-GPC (14:0/20:4)\*

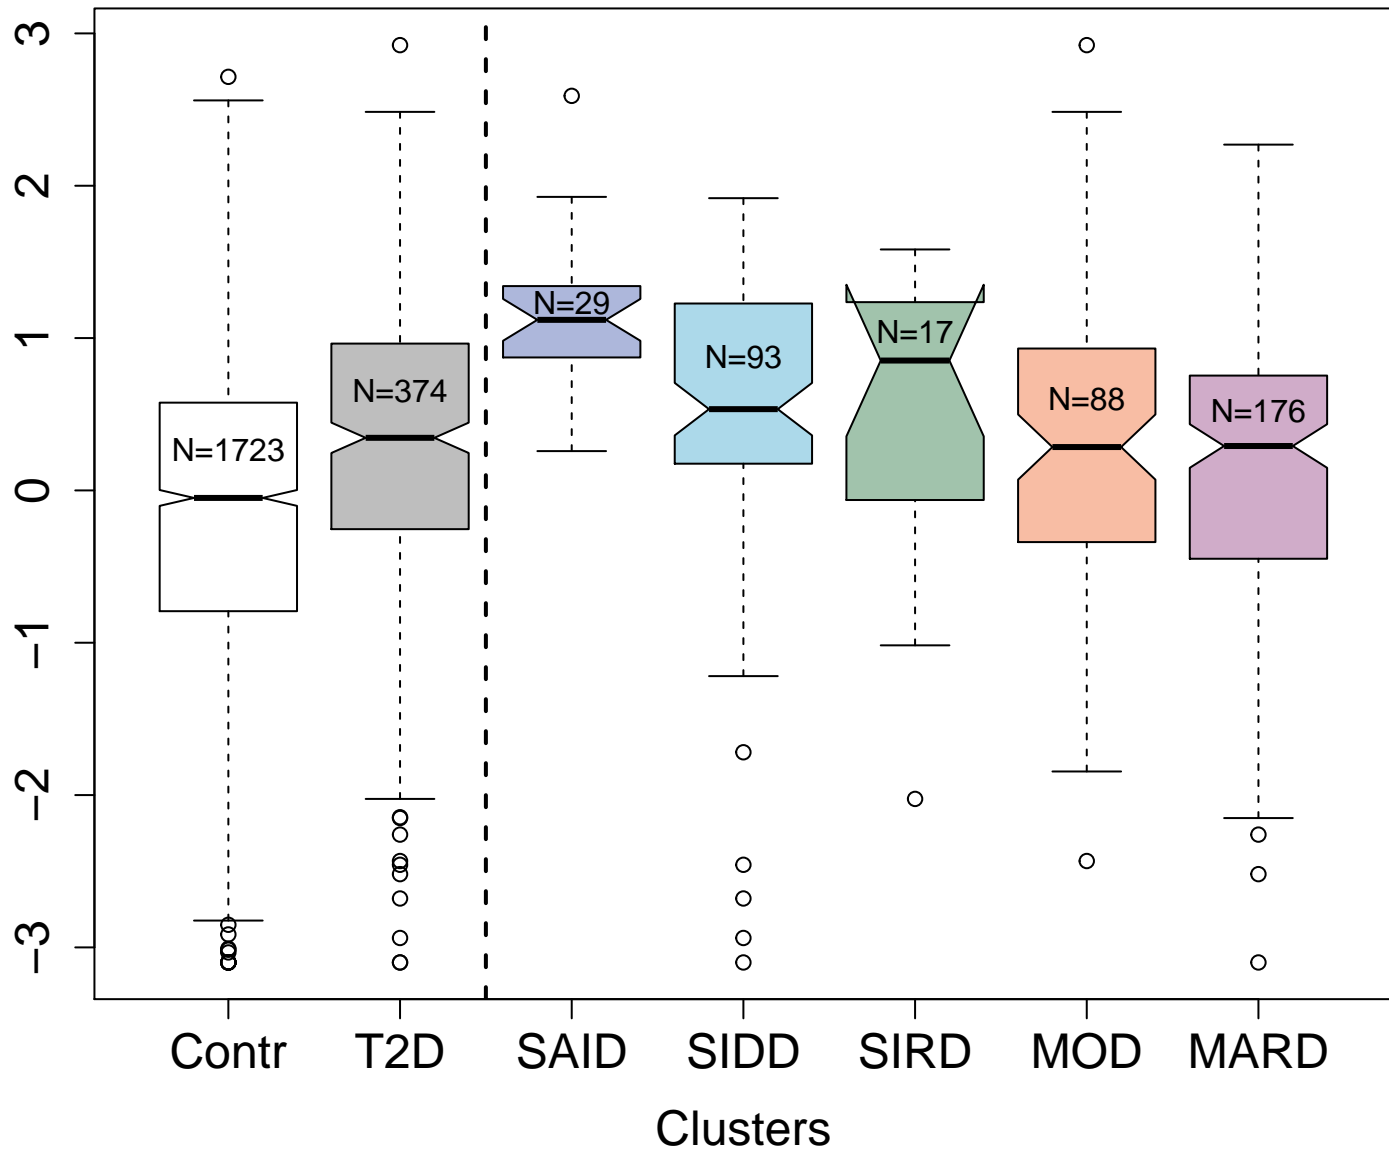

M52504 : X - 24309

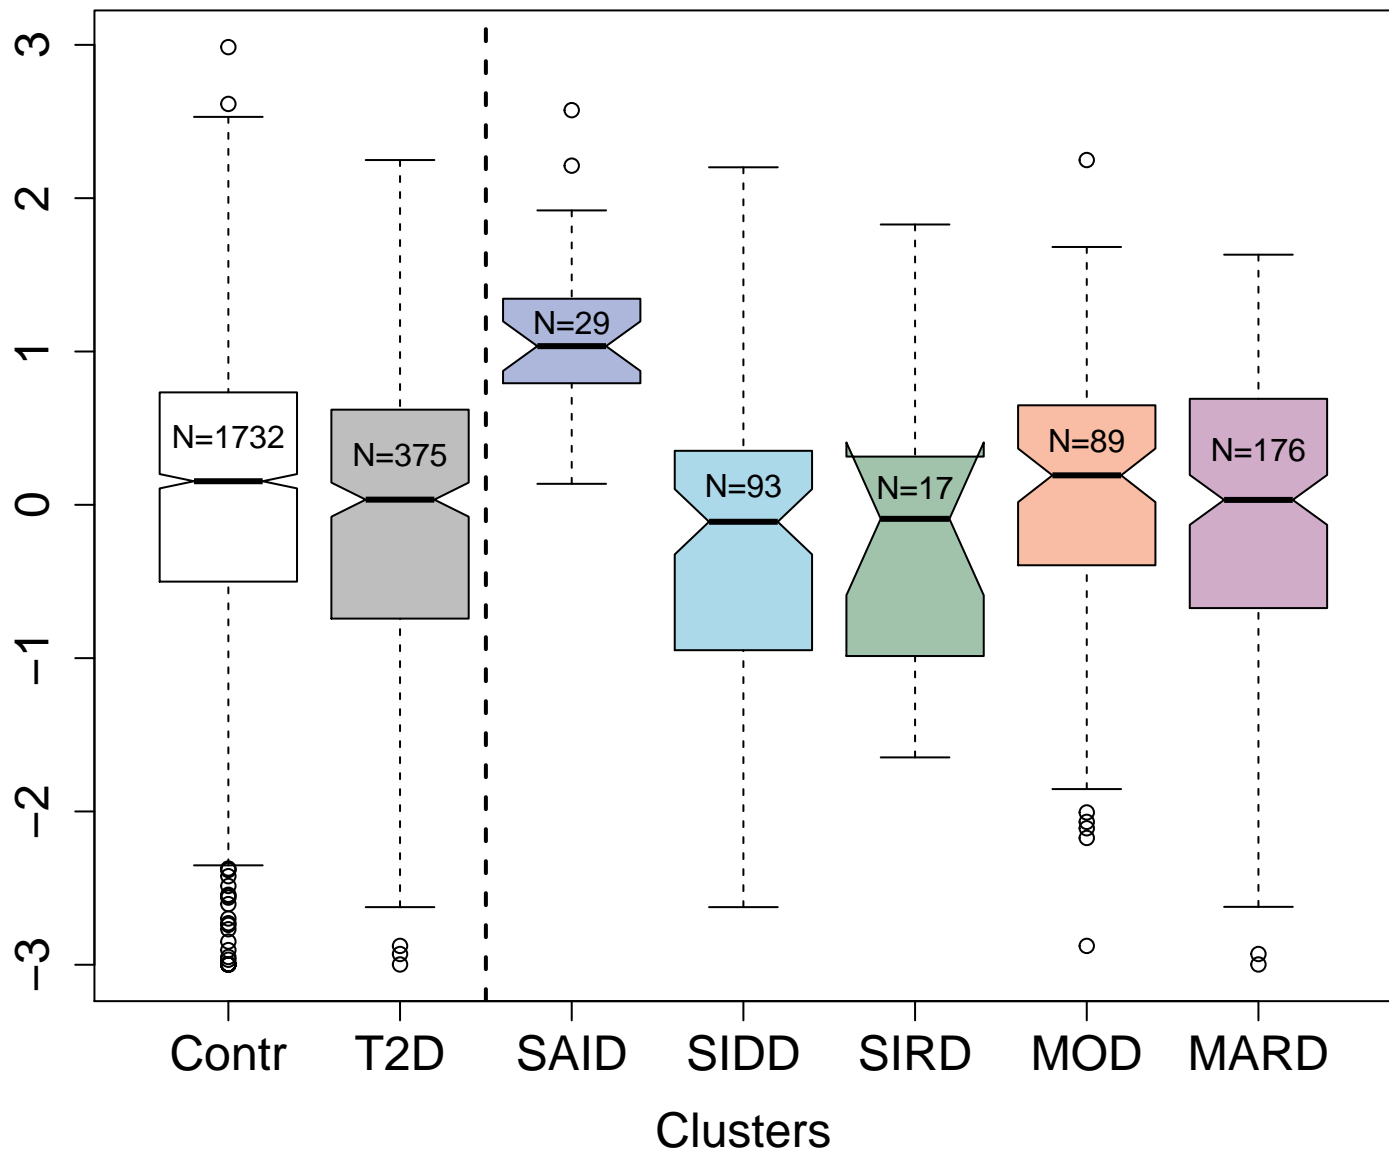

M48433 : N-formylphenylalanine

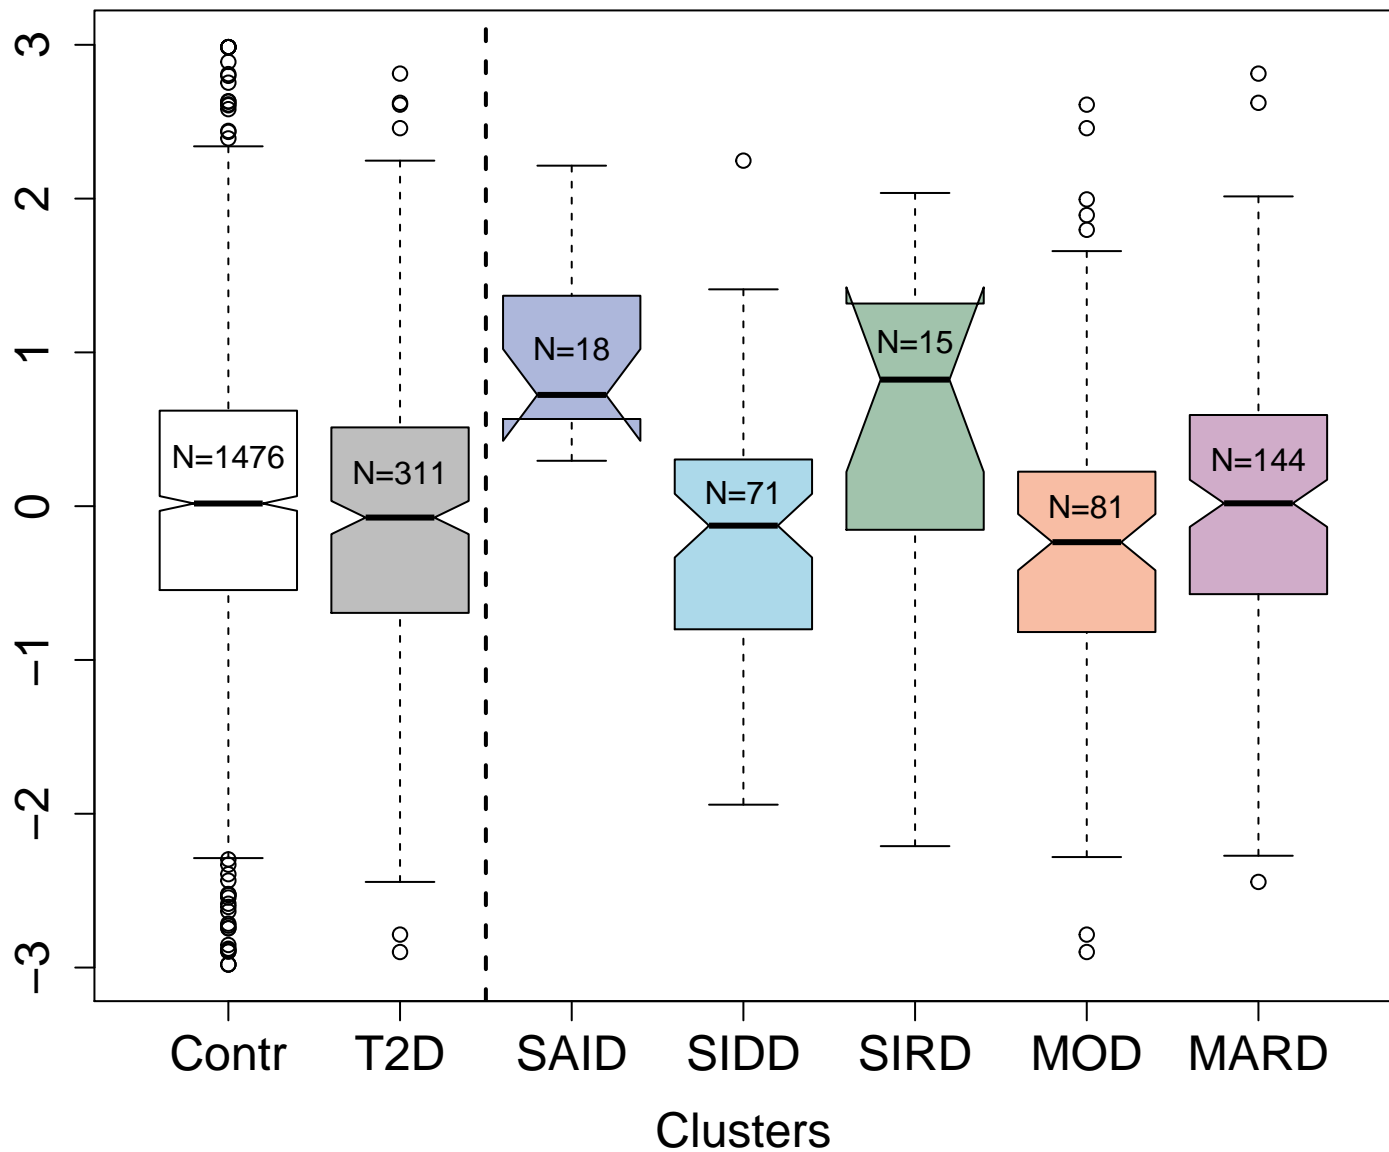

M34384 : stachydrine

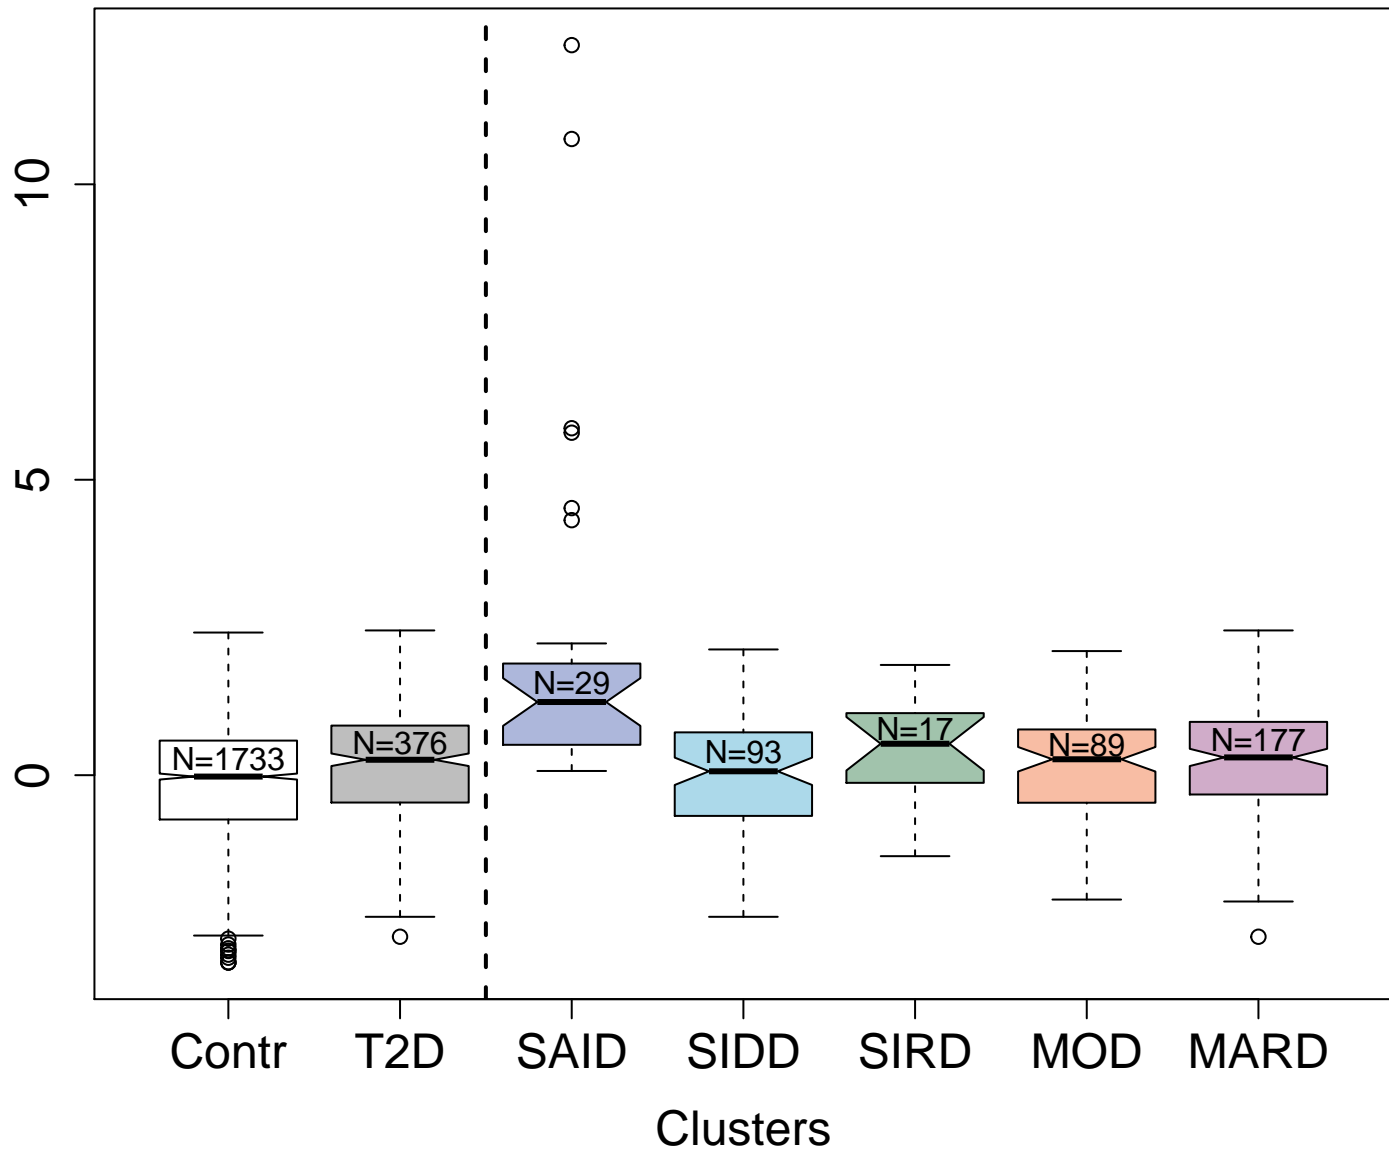

M61862 : hexadecenedioate (C16:1-DC)\*

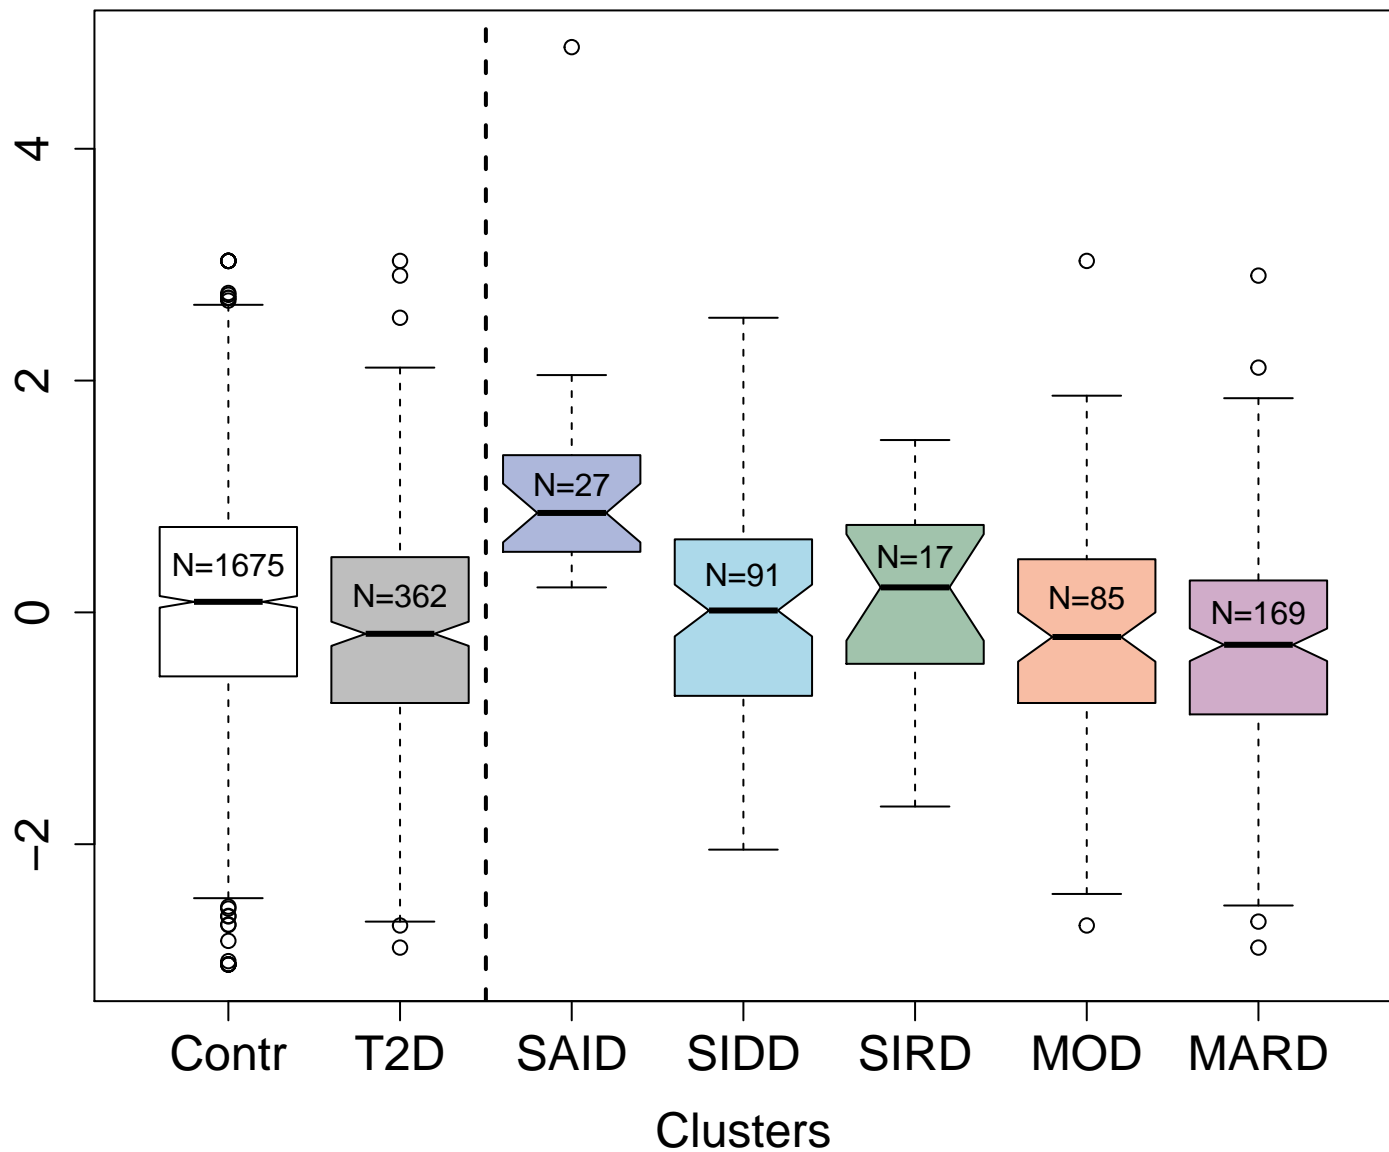

M46259 : X - 21258

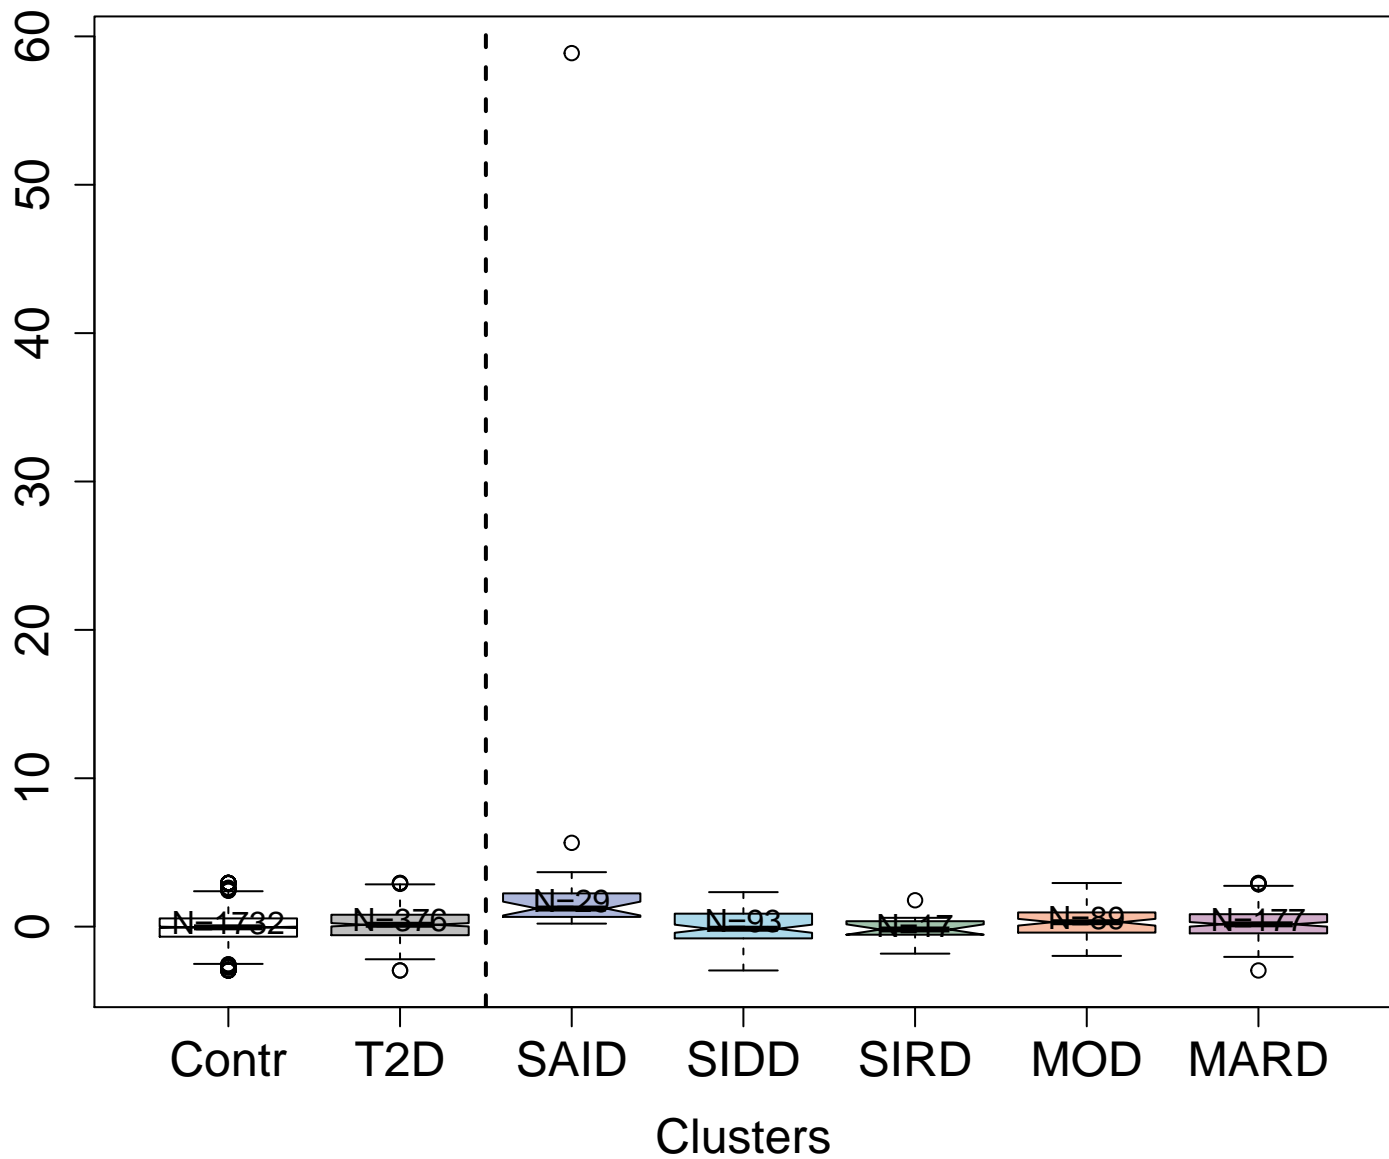

M37202 : androstenediol (3beta,17beta) disulfate (1)

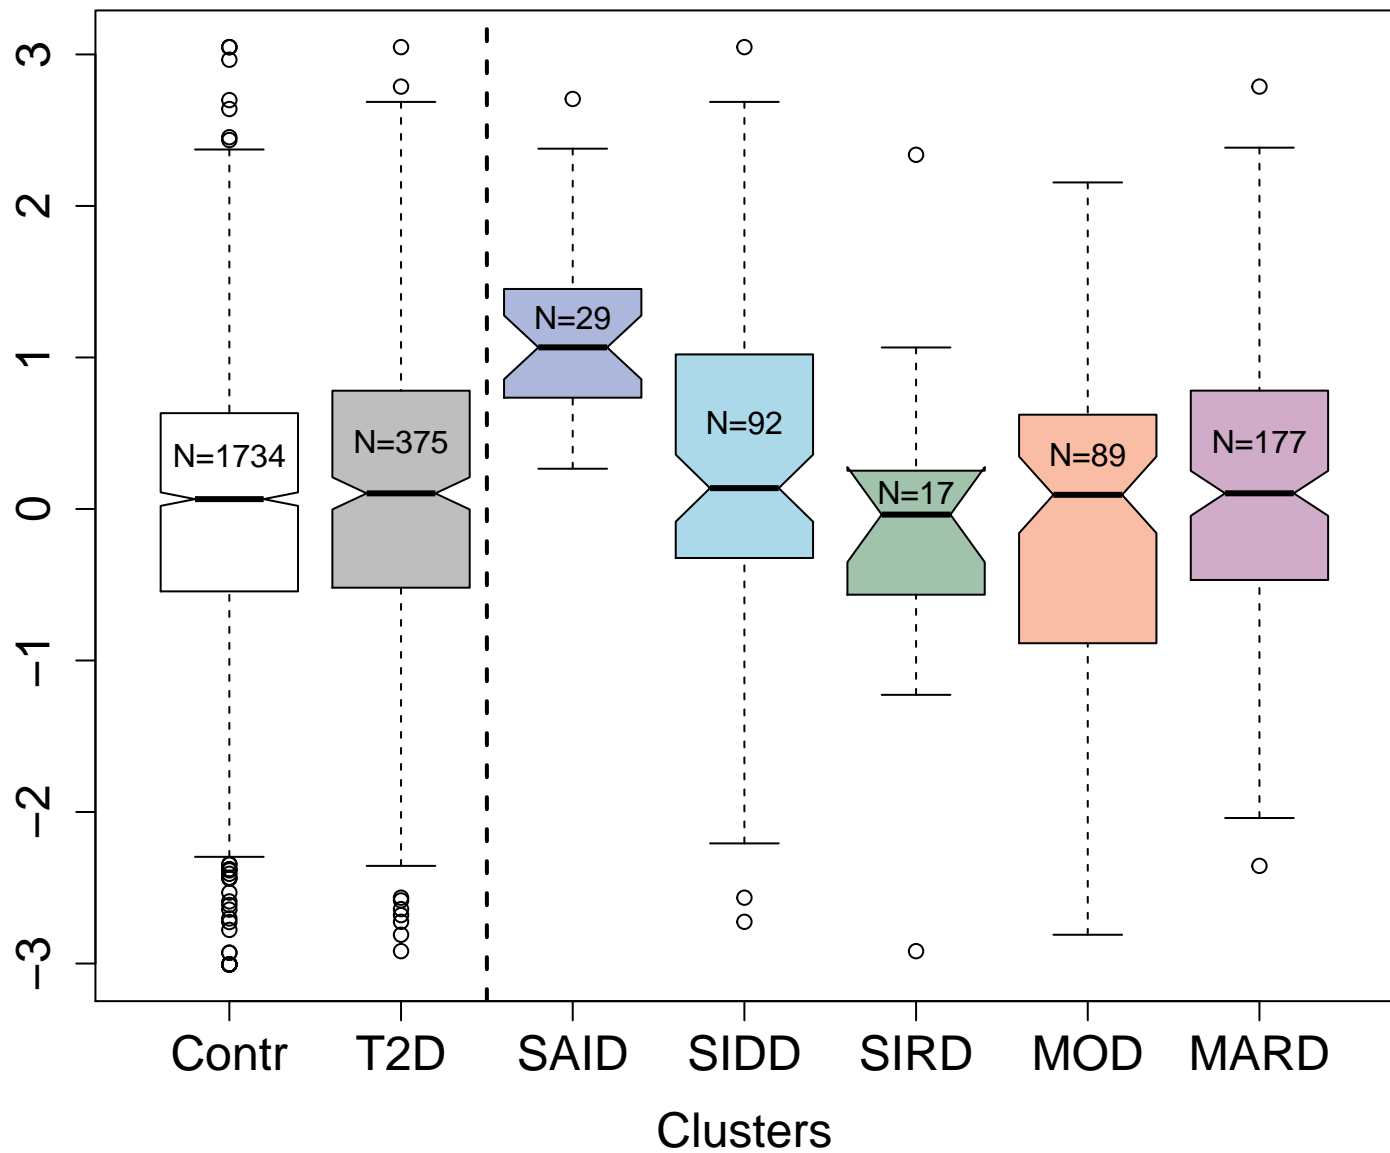

M1105 : linoleate (18:2n6)

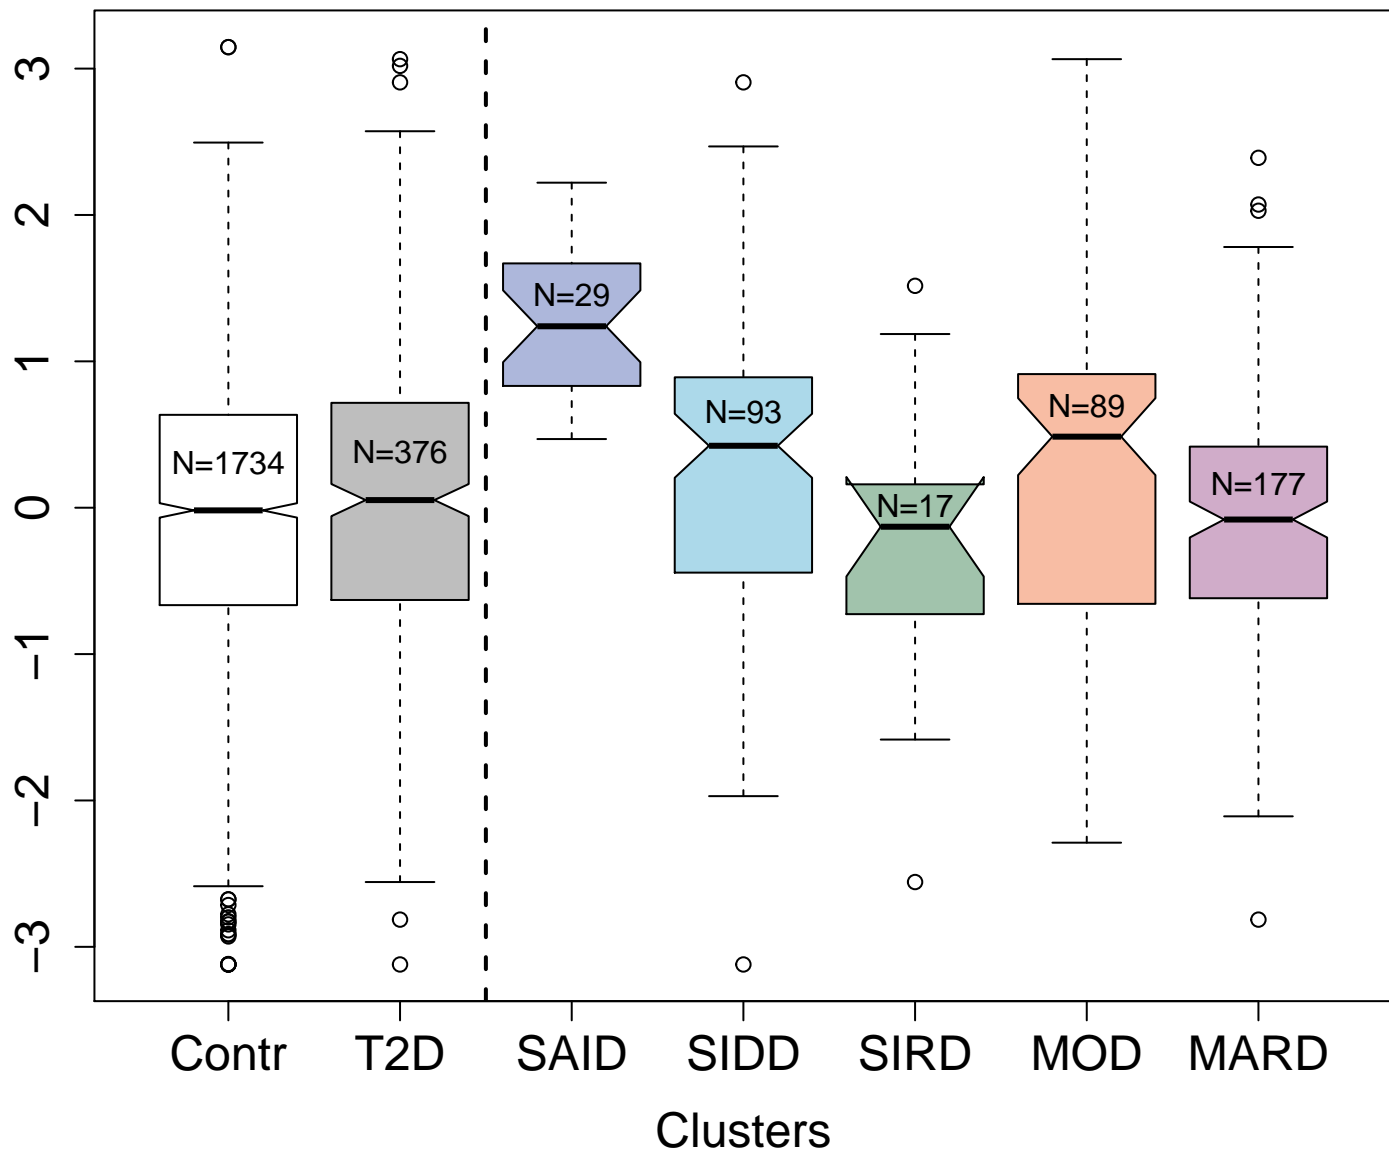



M55015 : gamma-glutamyl-alpha-lysine

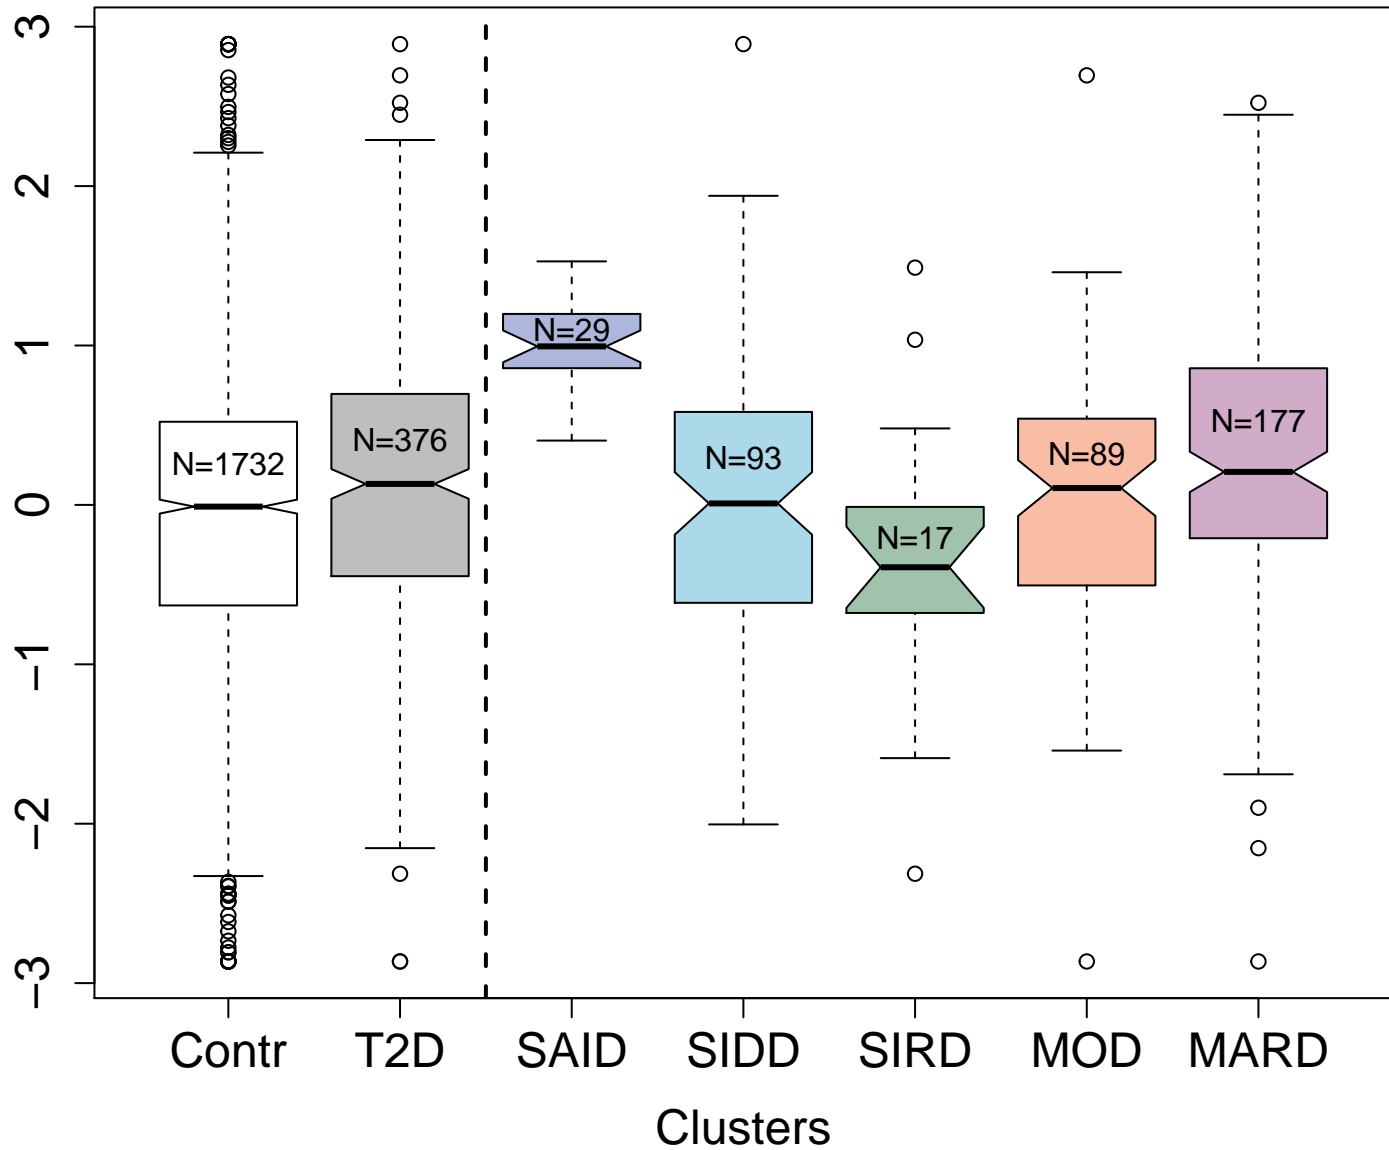

M62964 : X - 25520

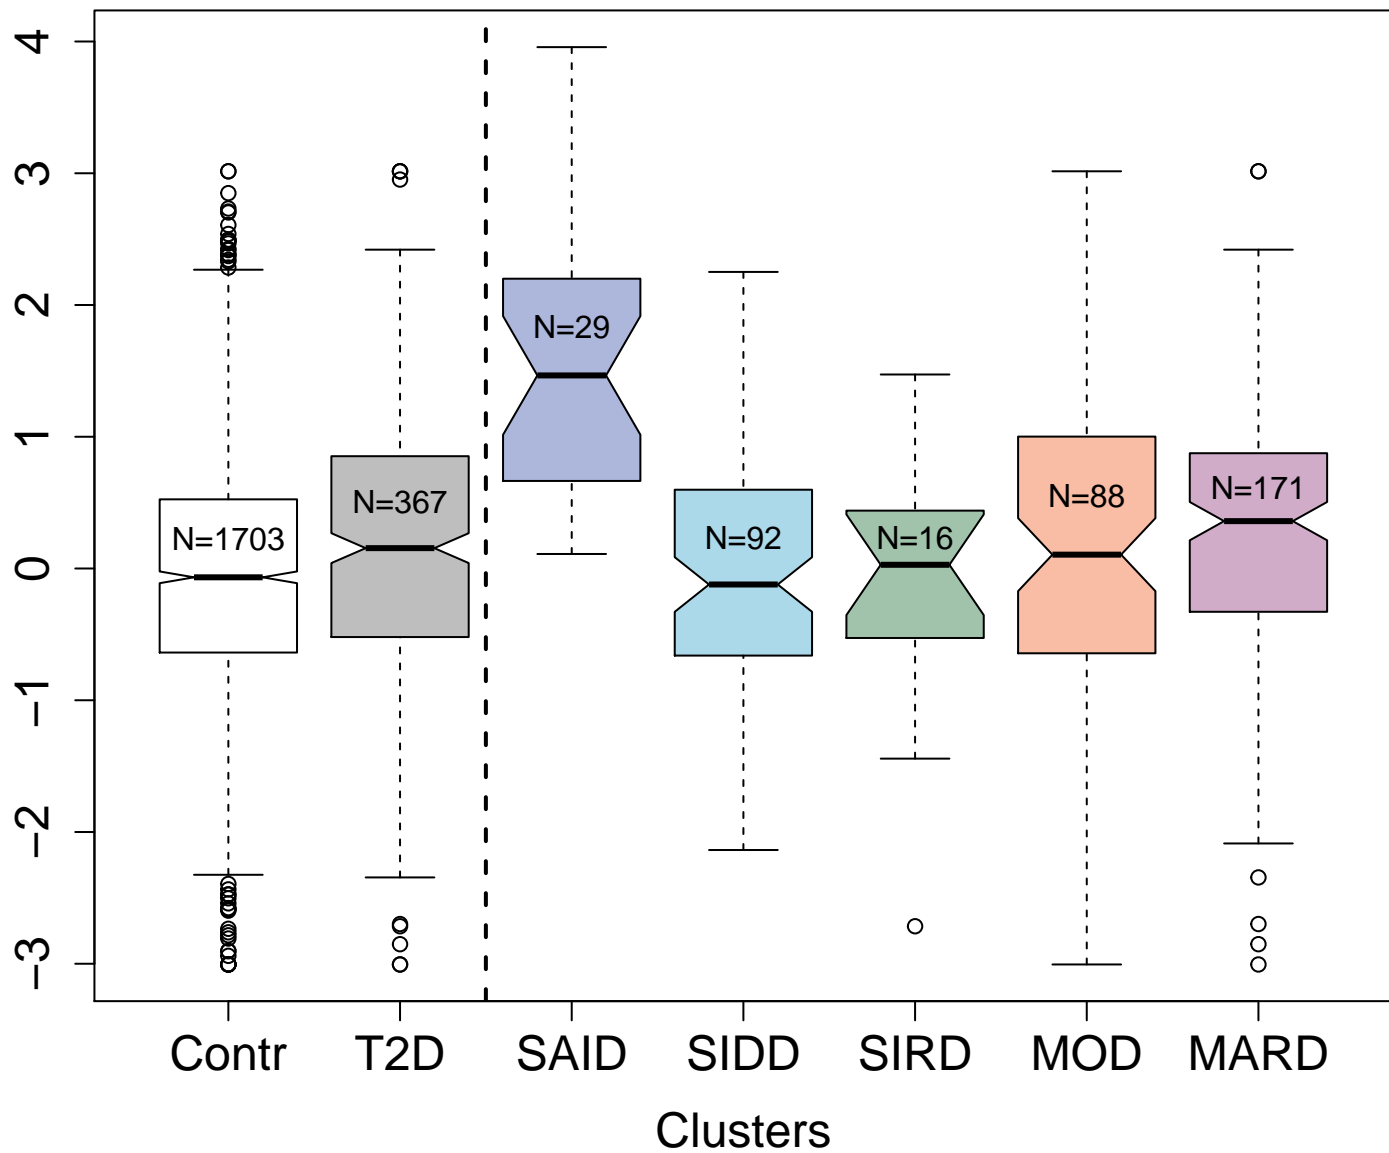

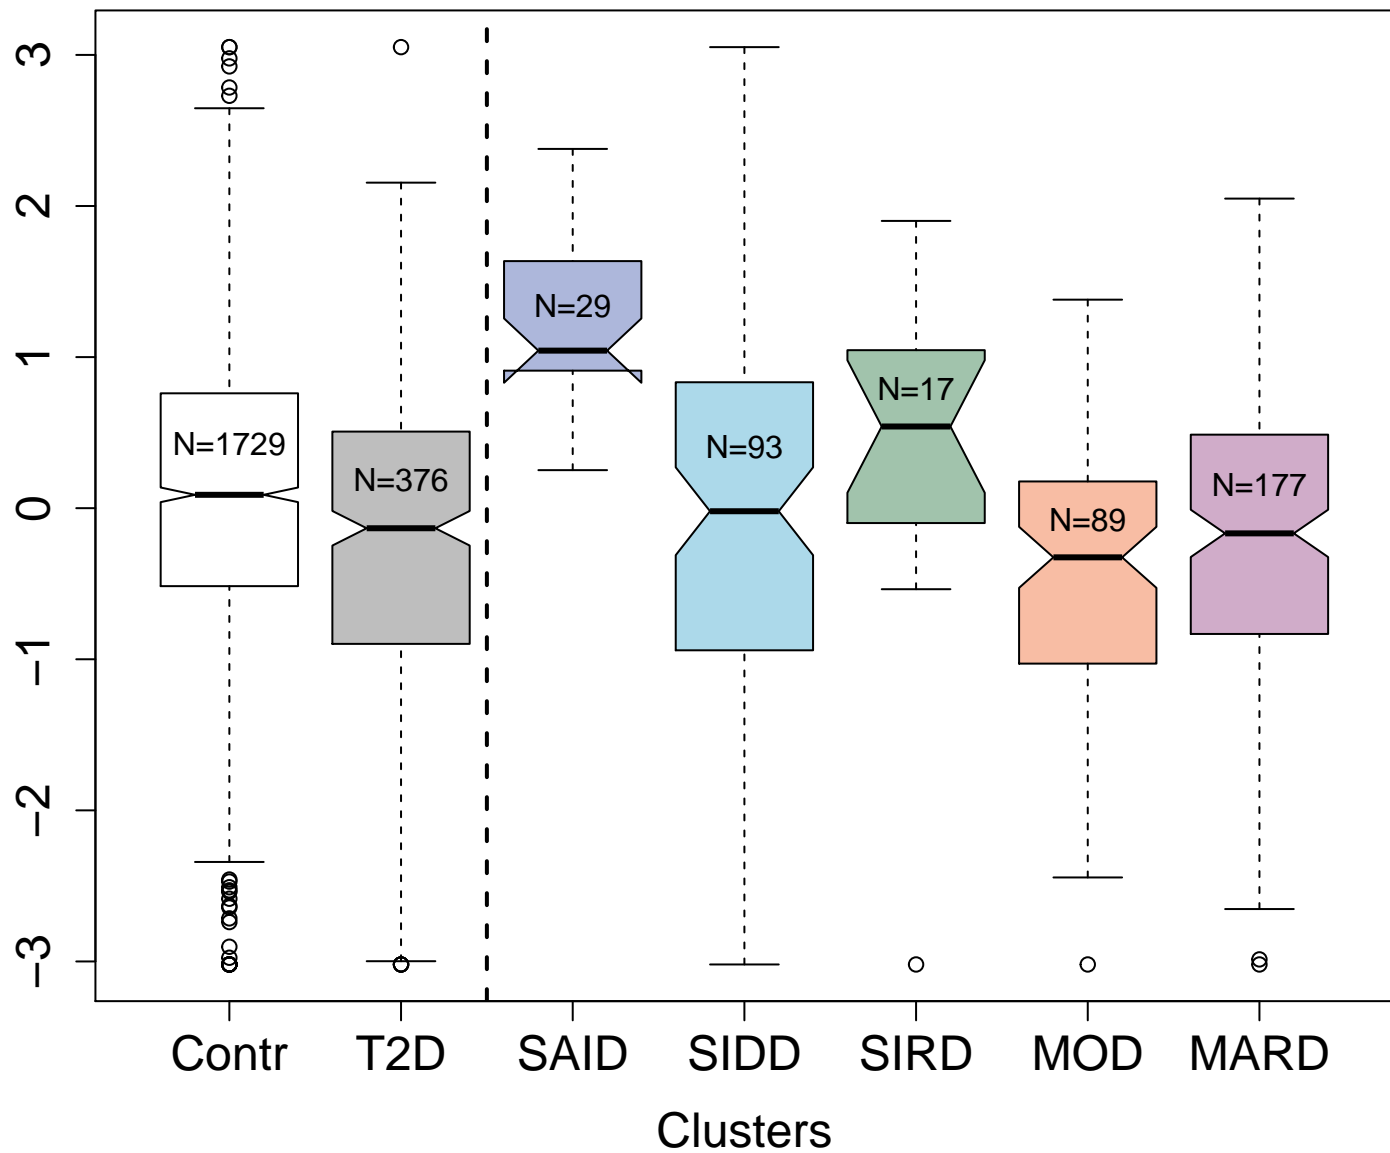

M48182 : myristoleoylcarnitine (C14:1)\*

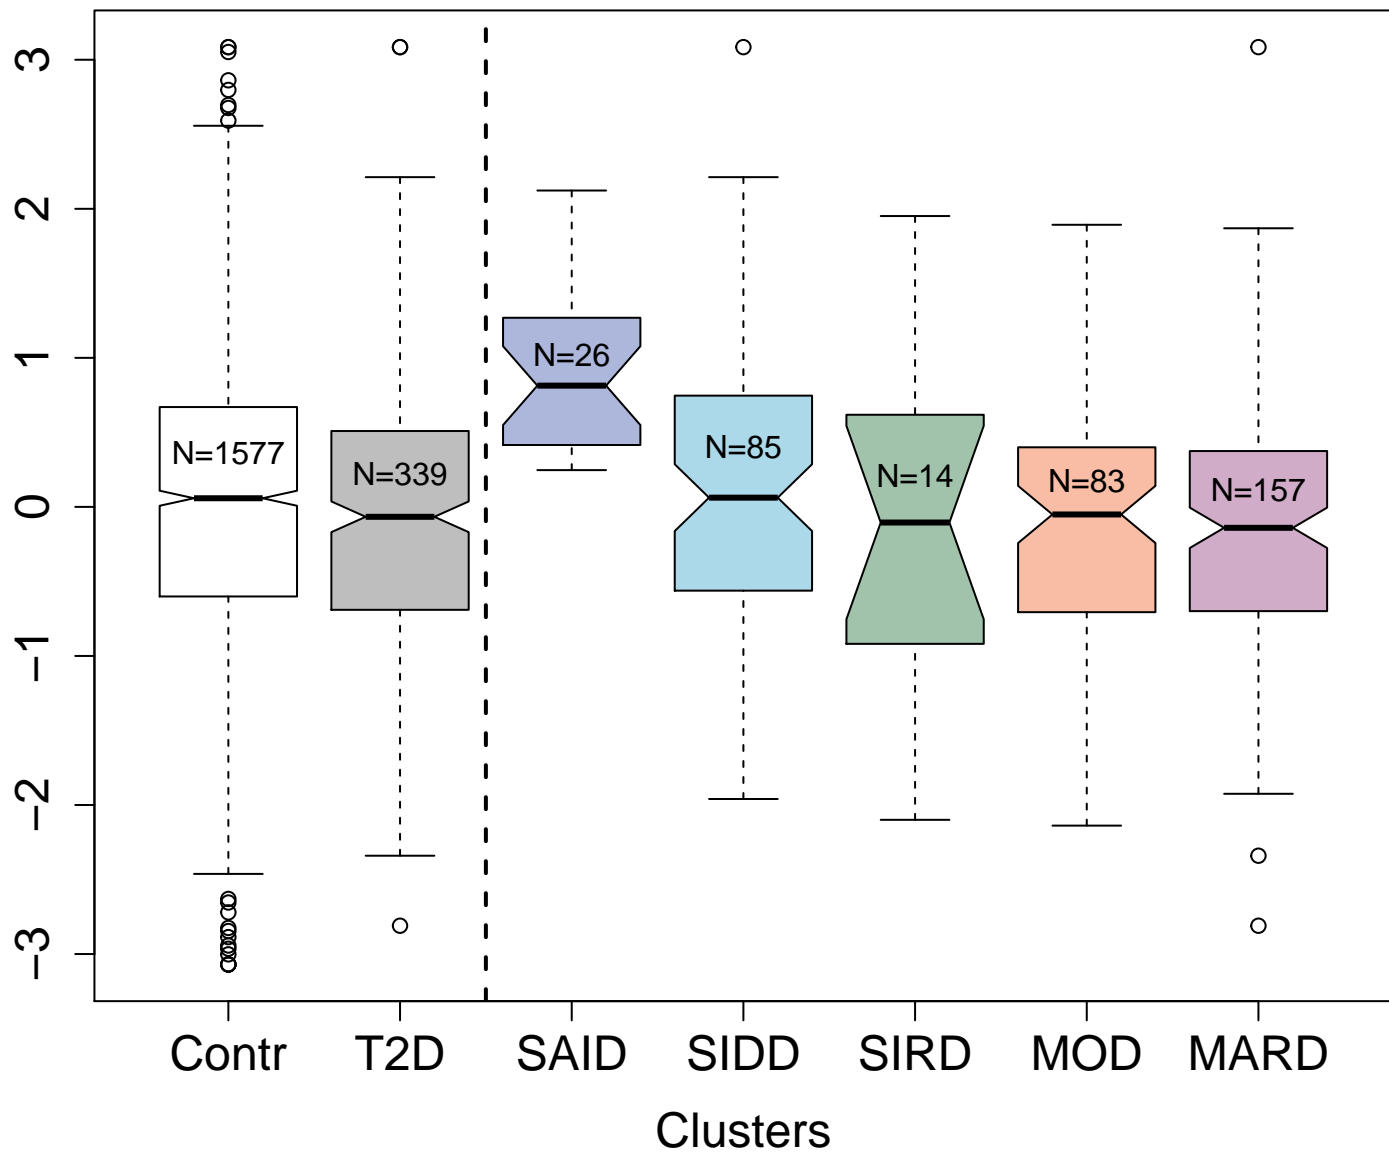

M47439 : X - 13507

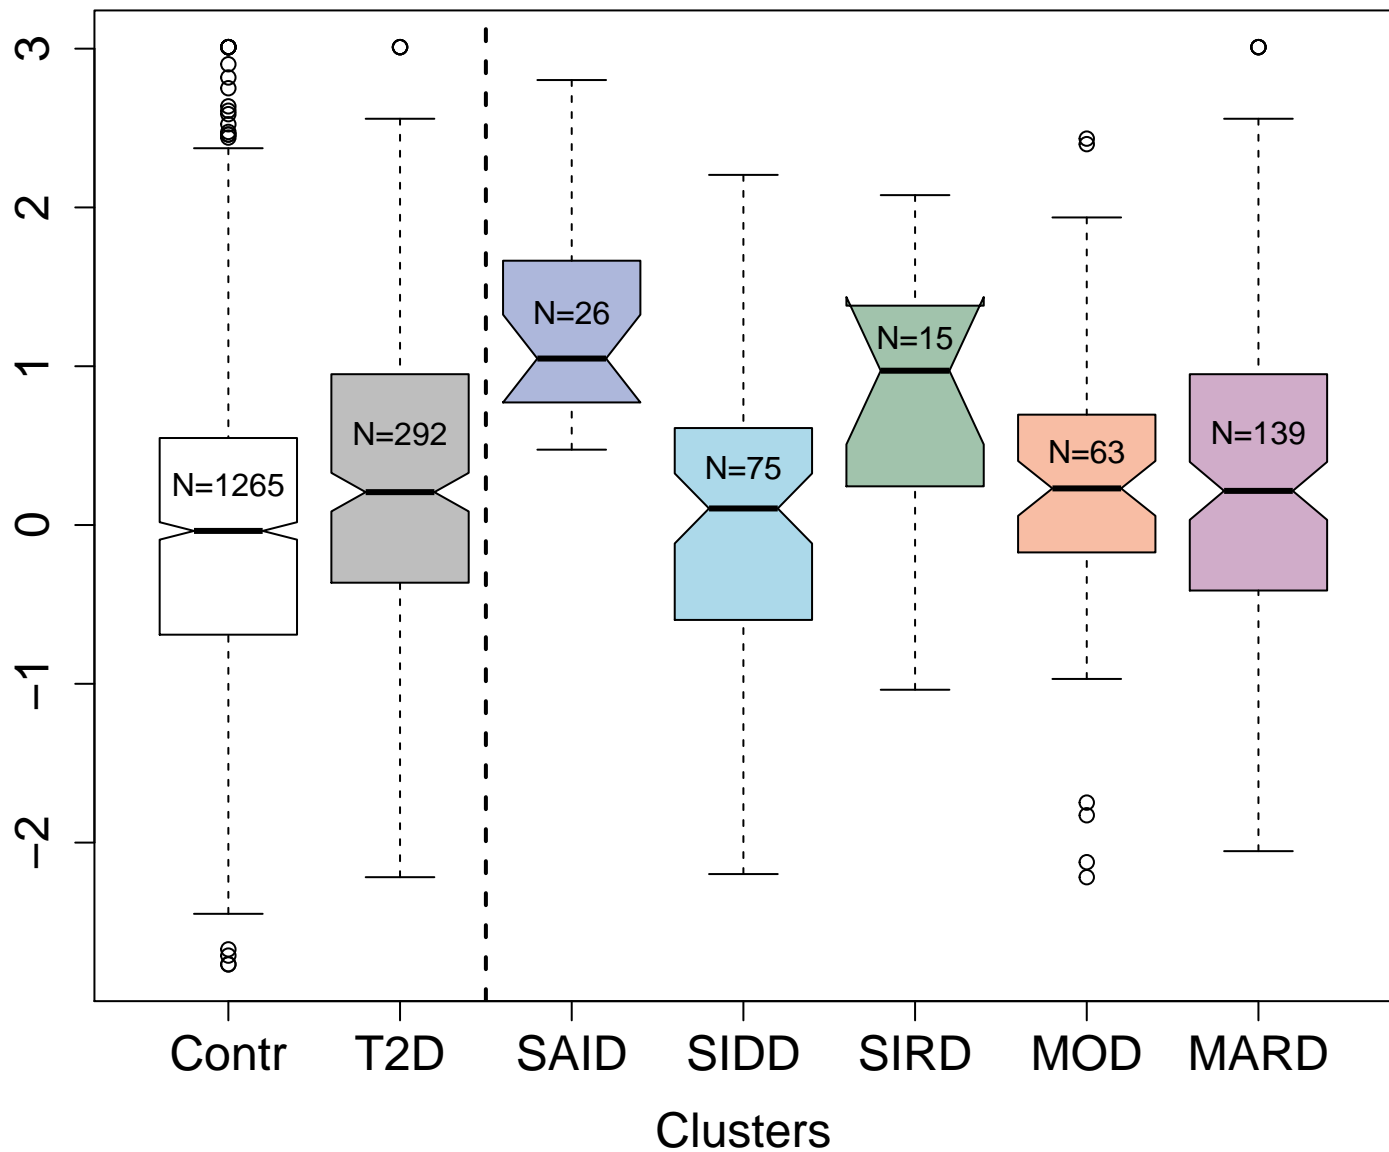

M49521: X - 23644

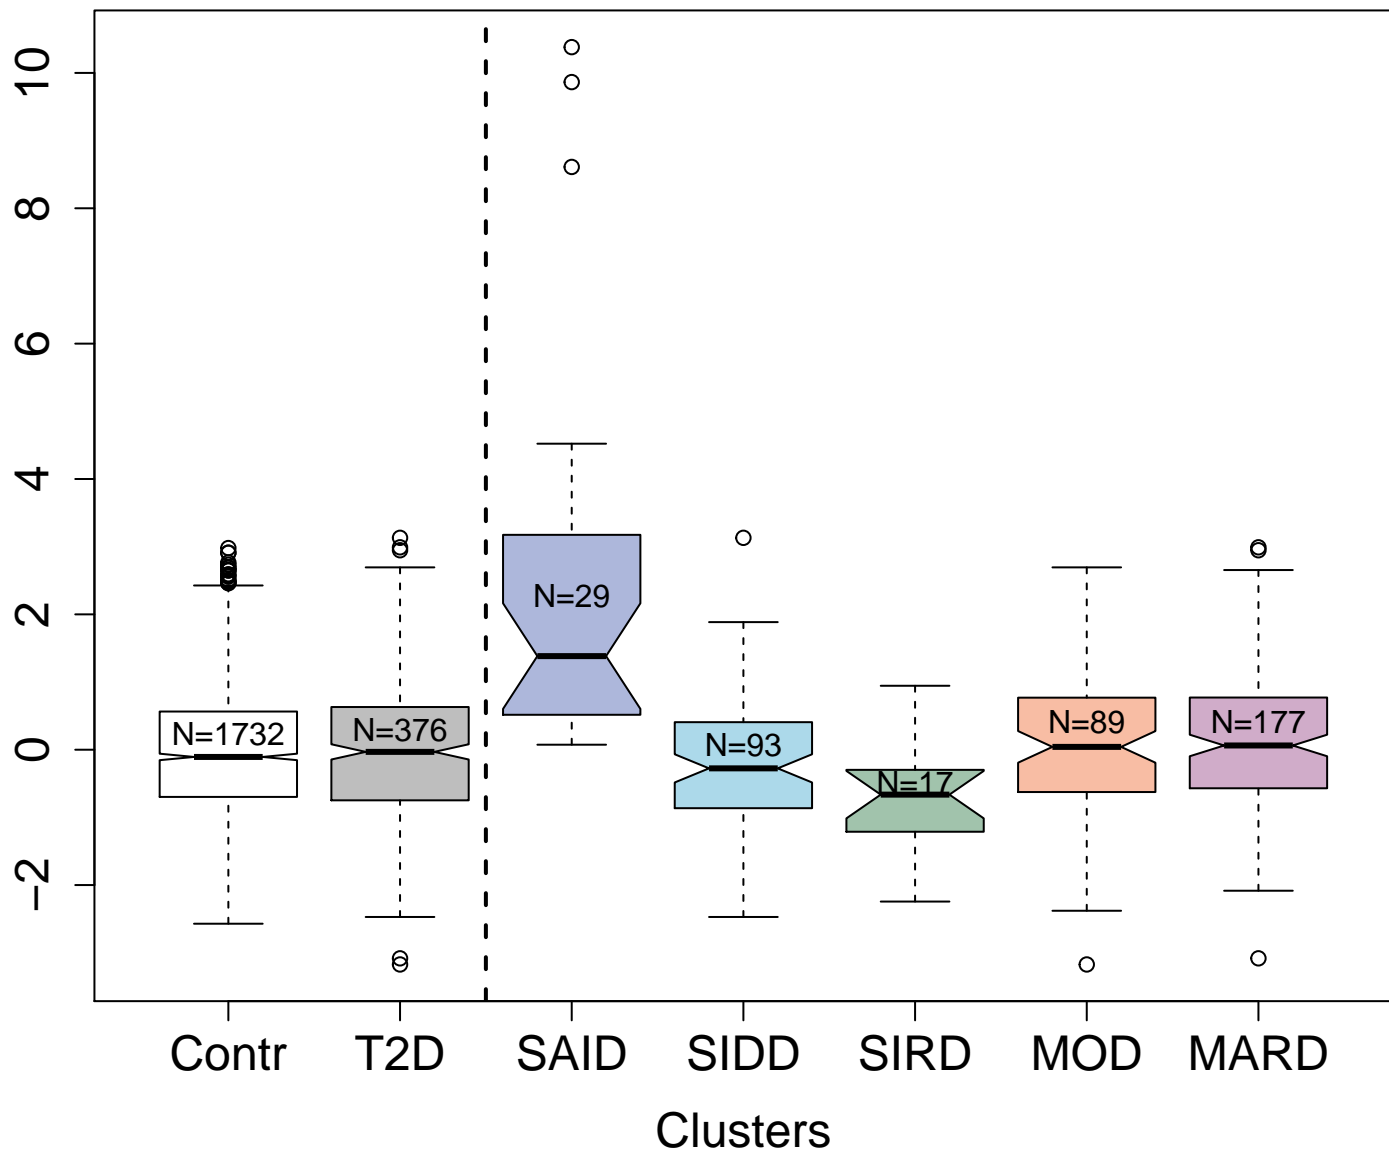

M61881 : glucuronide of C10H18O2 (1)\*

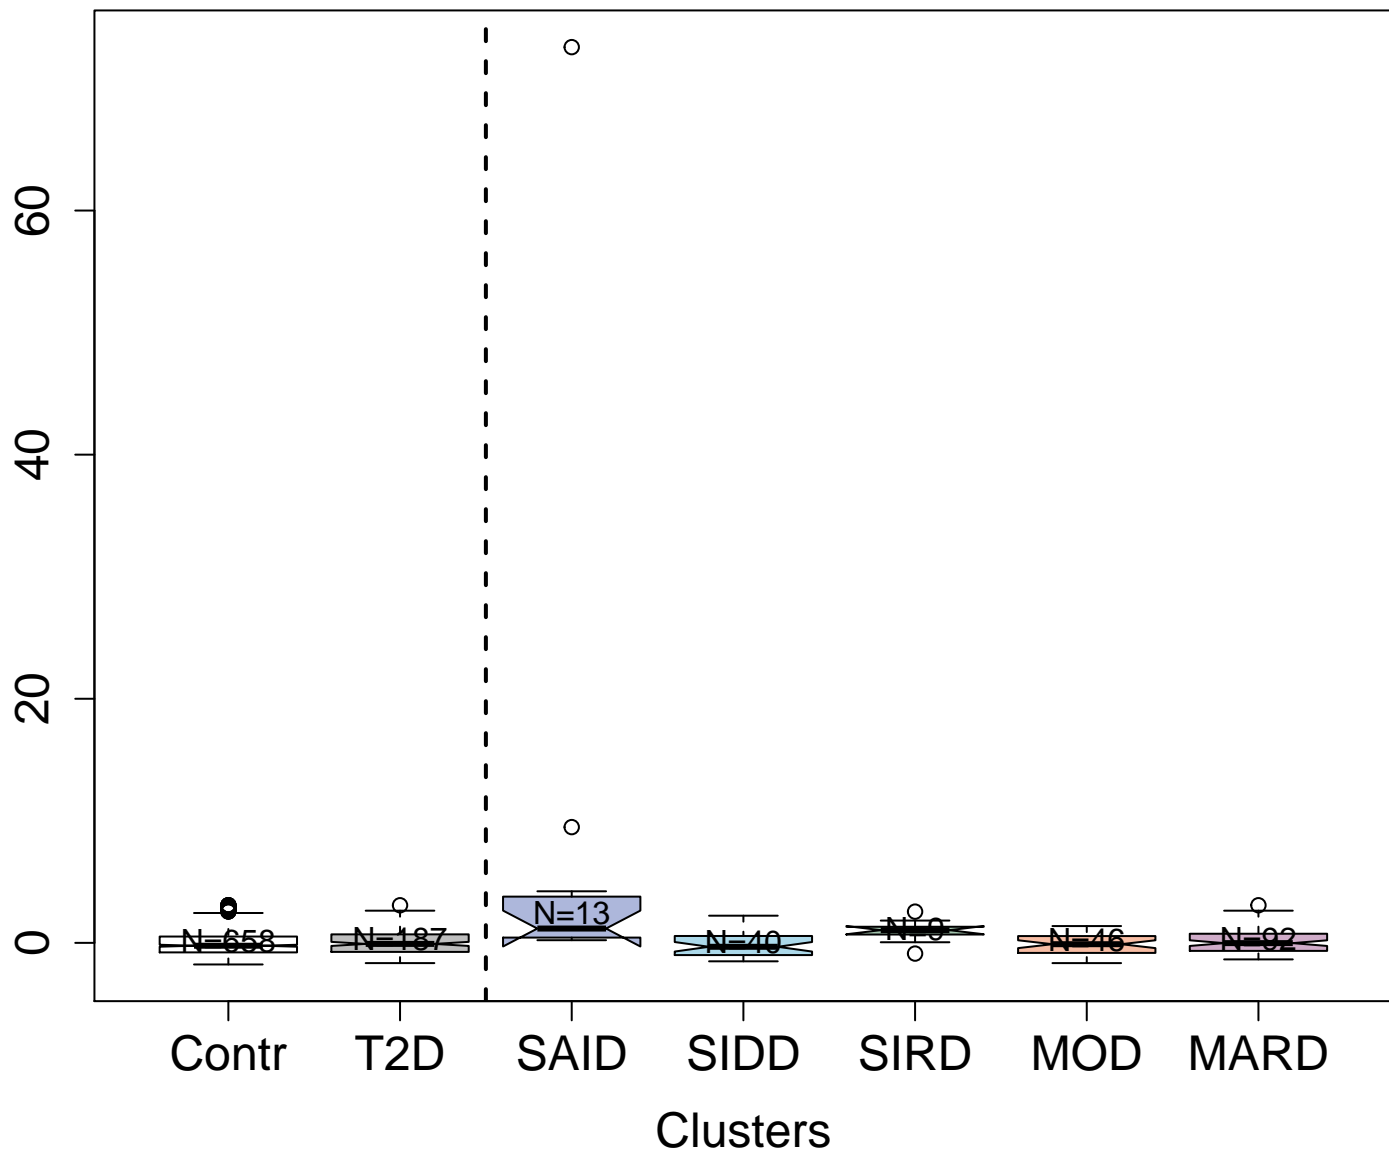

M594 : nicotinamide

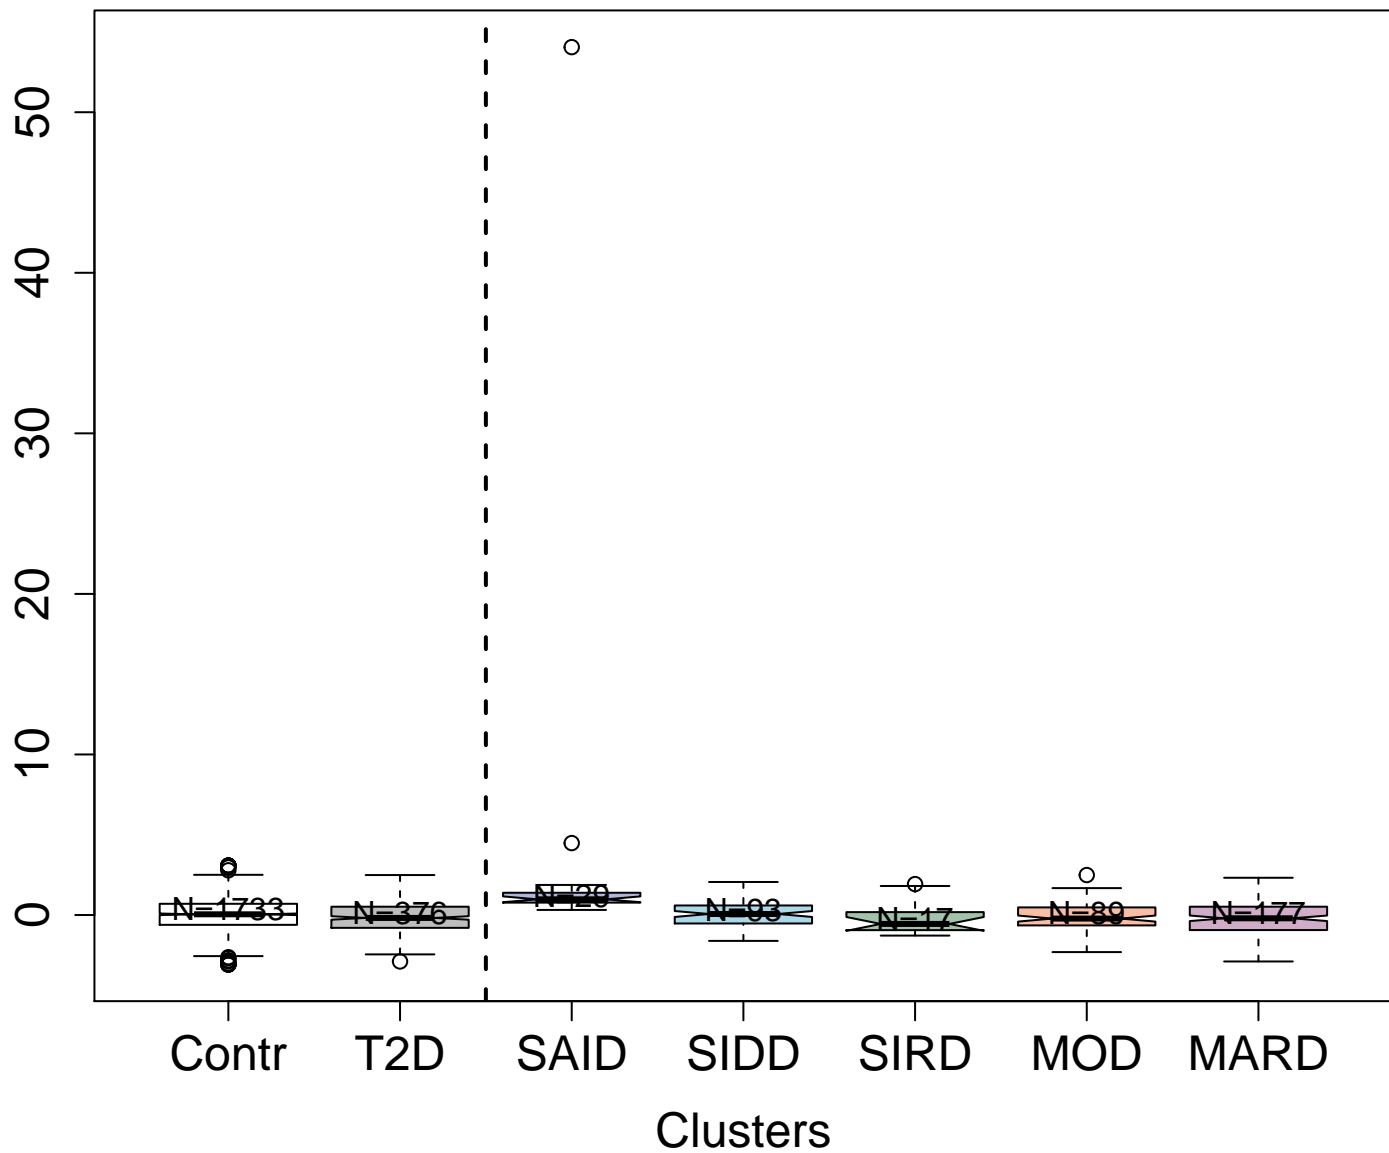



M19265 : 1-stearoyl-2-oleoyl-GPS (18:0/18:1)

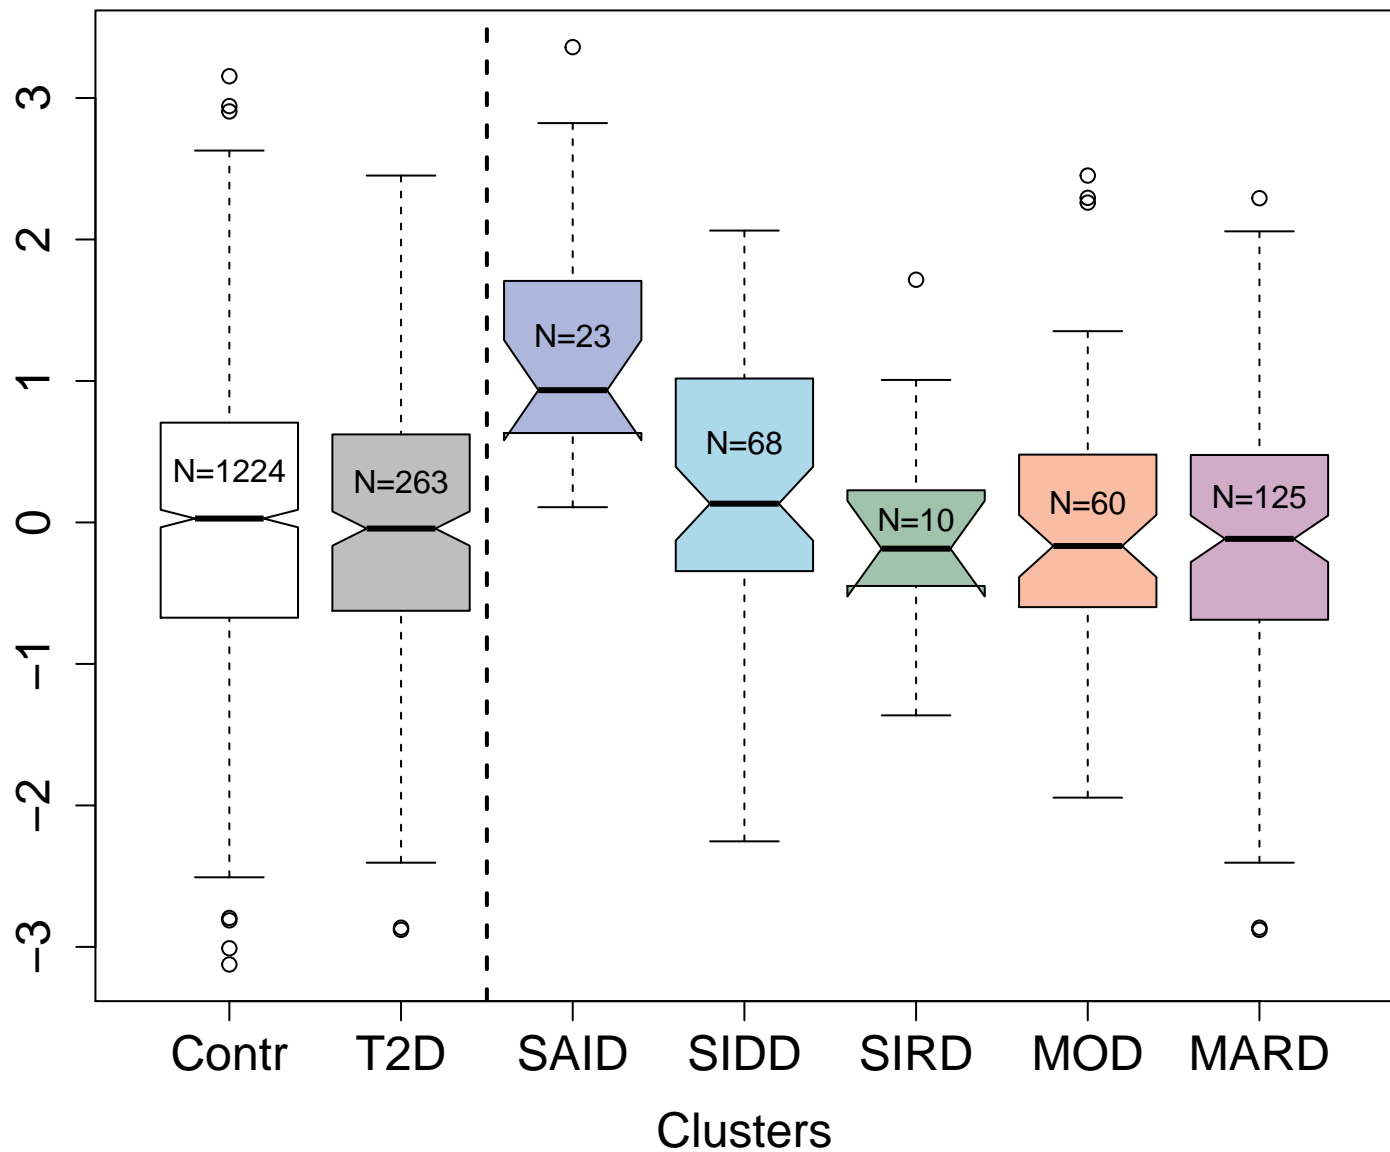

M47301 : X - 18887

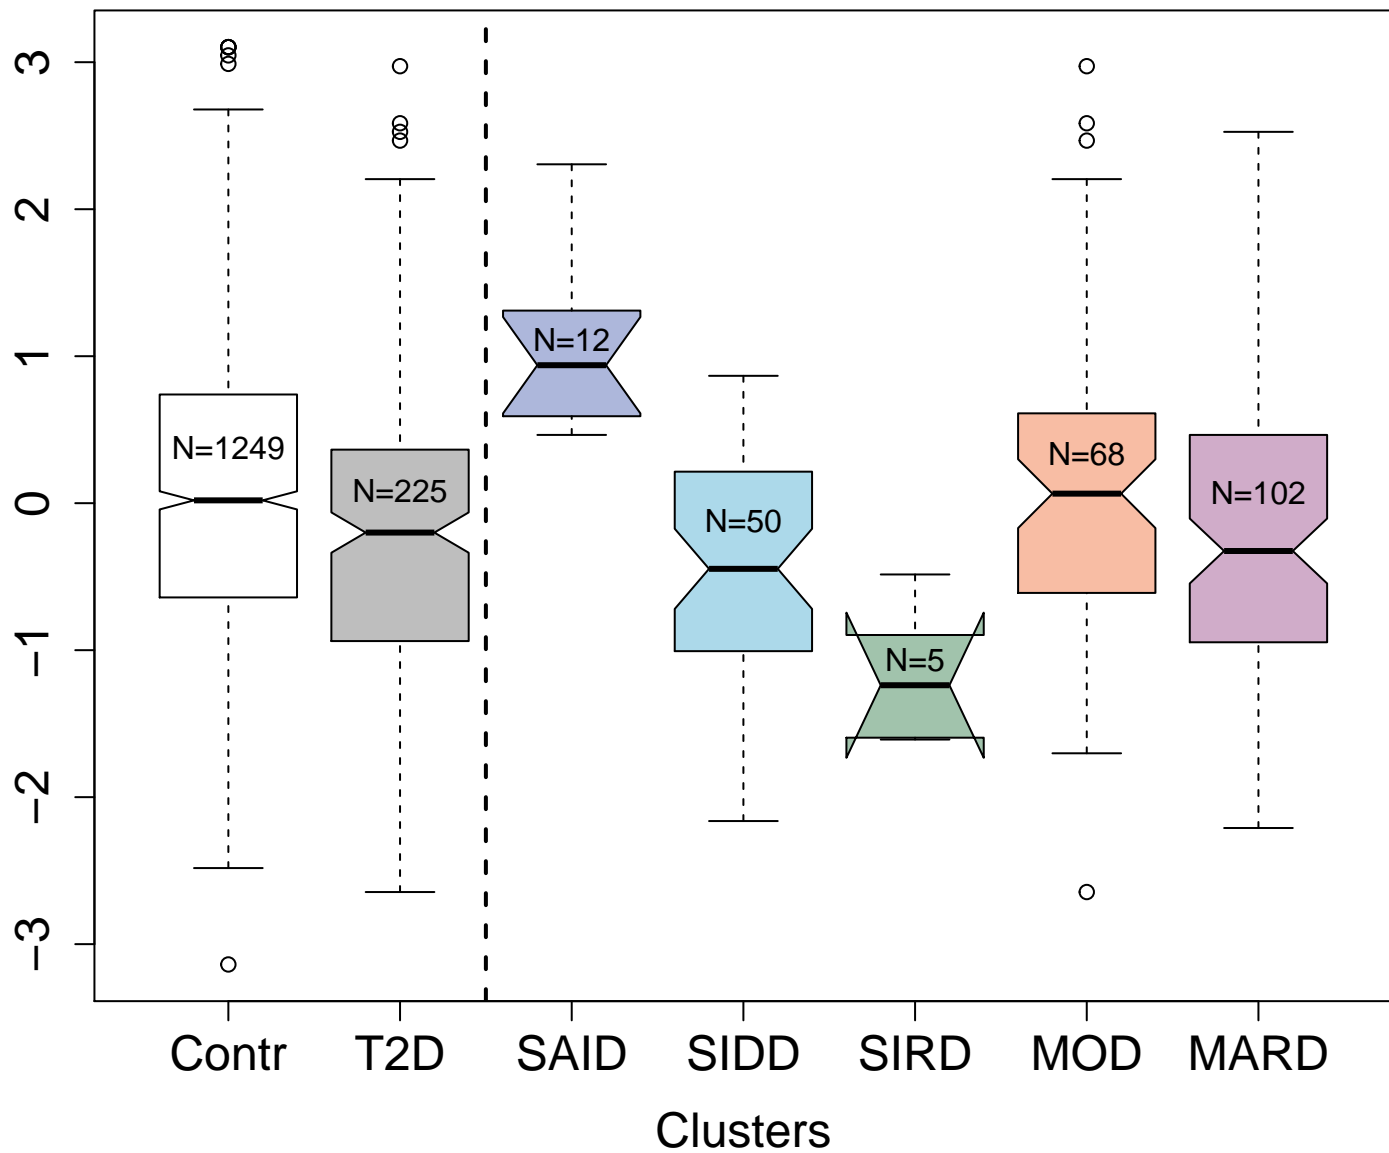

M57483 : sphingomyelin (d17:2/16:0, d18:2/15:0)\*

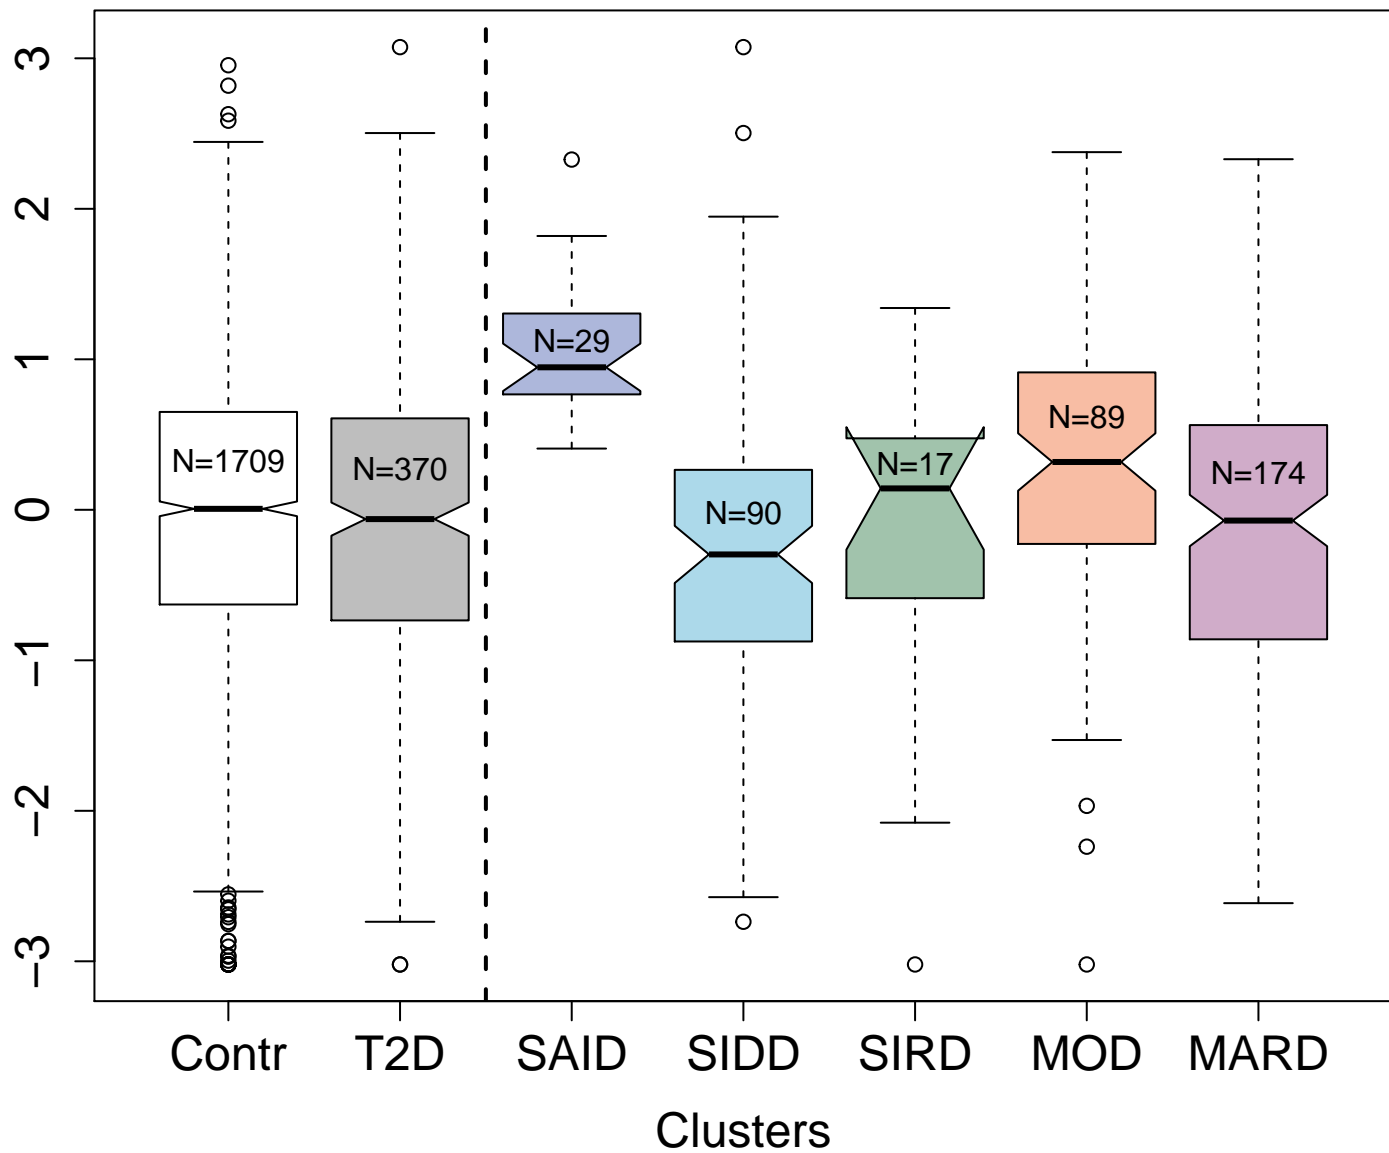

M47204 : X - 14904

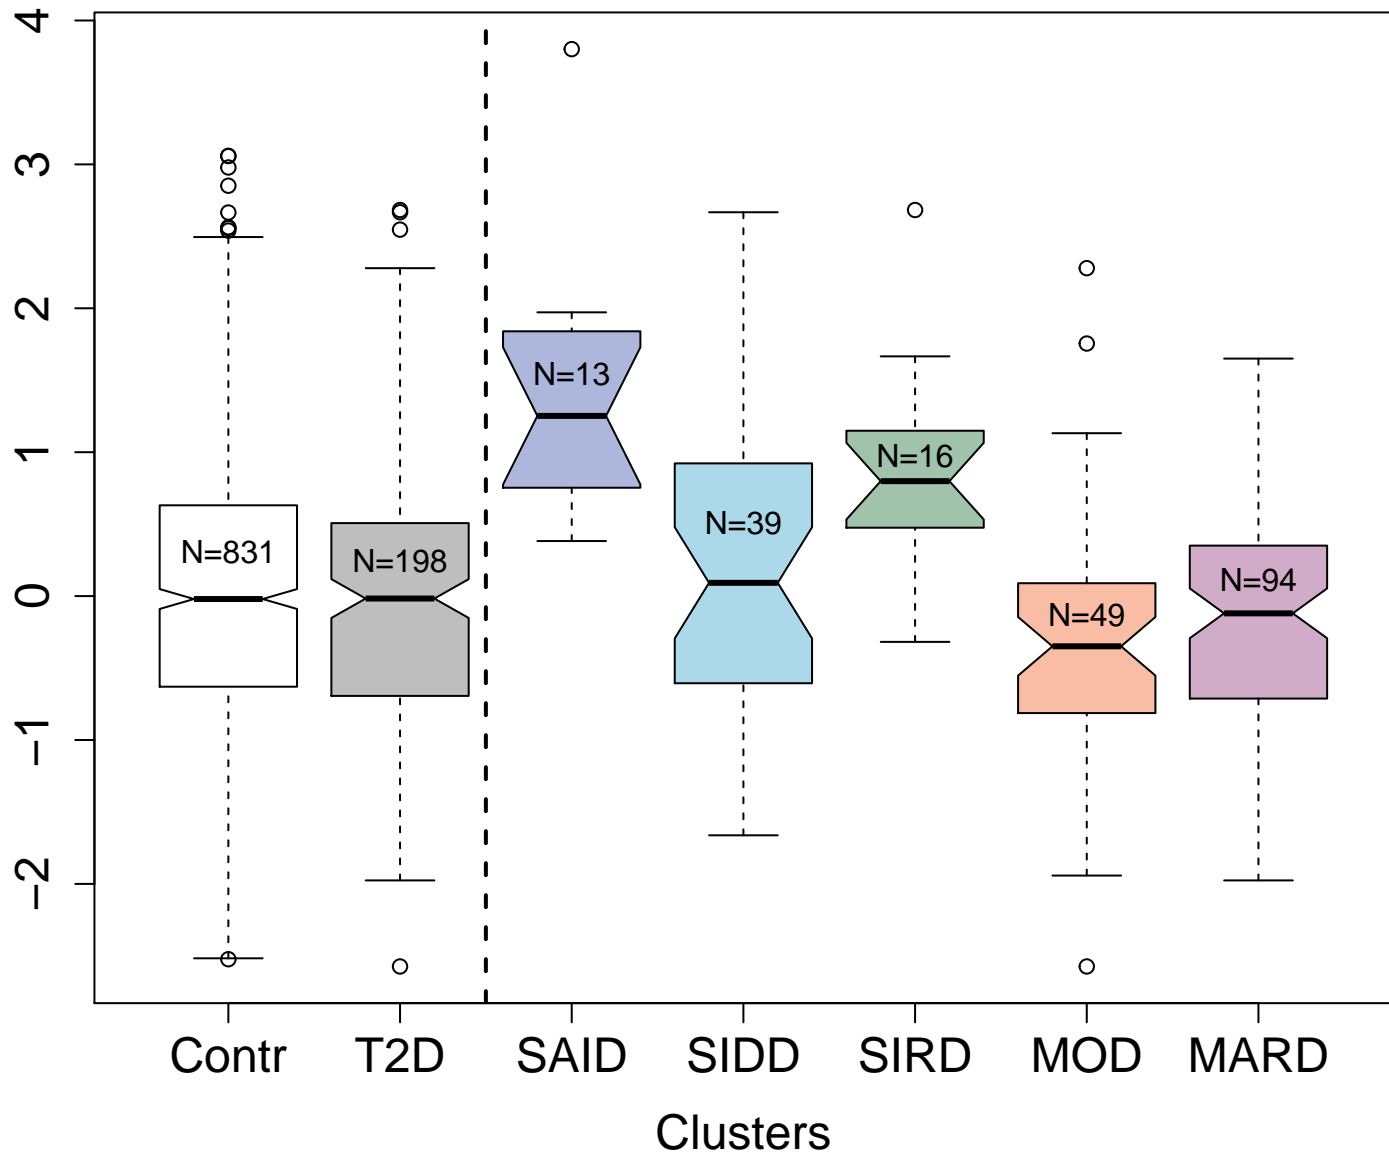

M62564 : 1-carboxyethyltyrosine

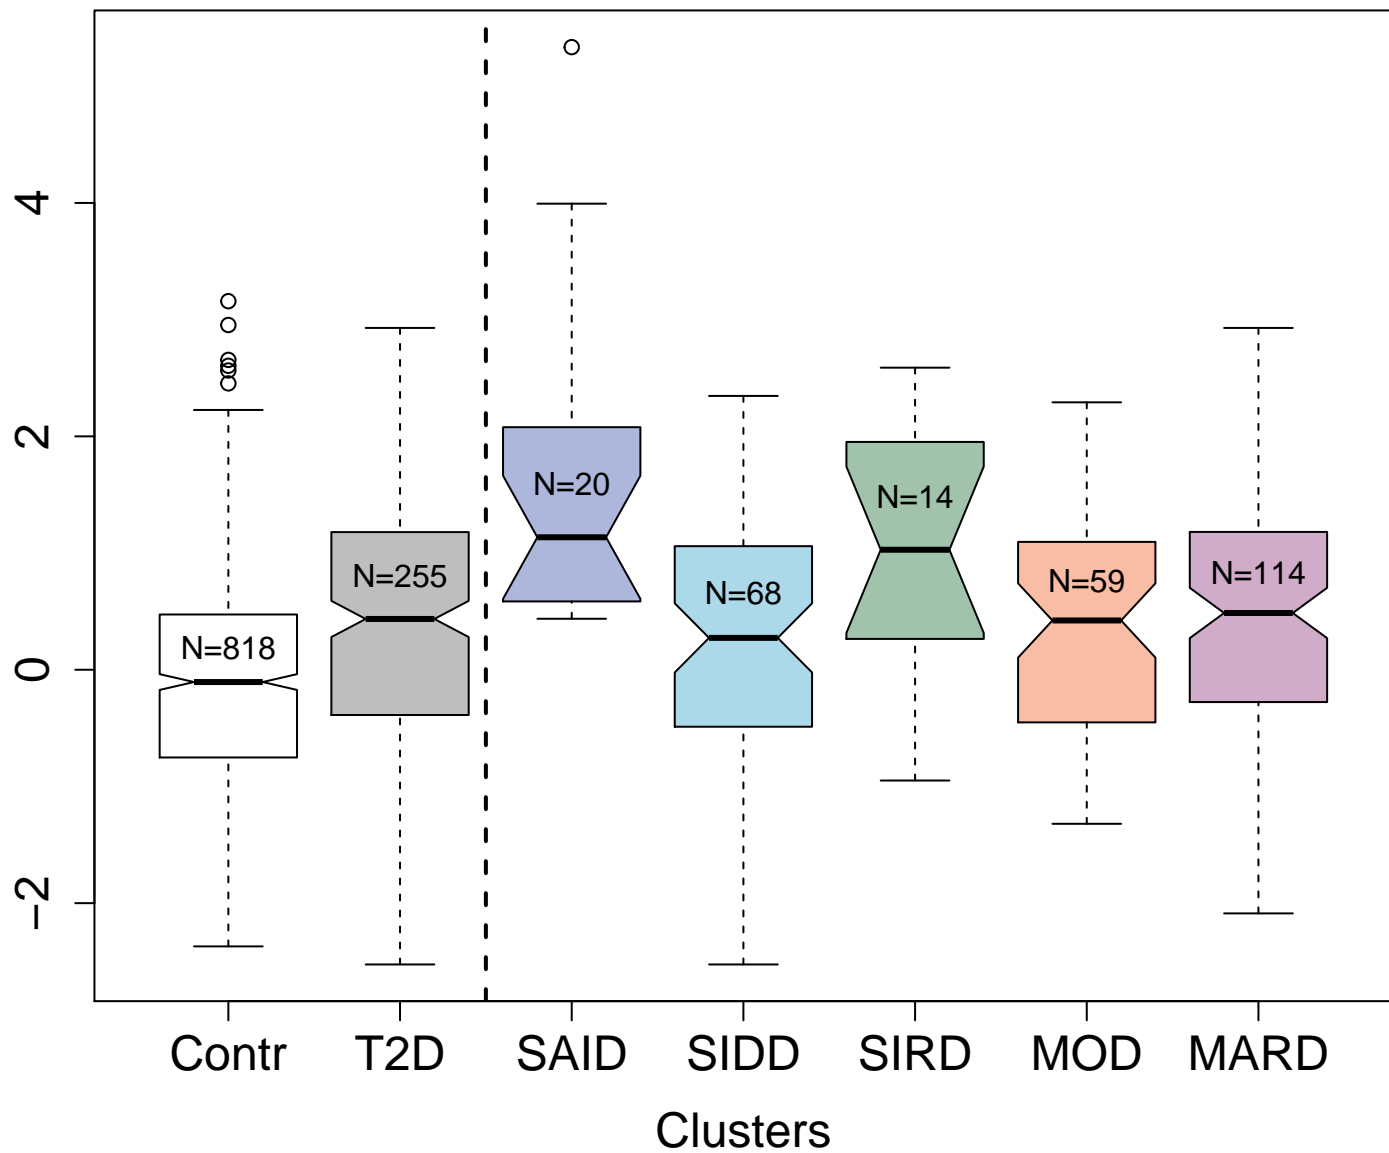

M47959 : X - 13553

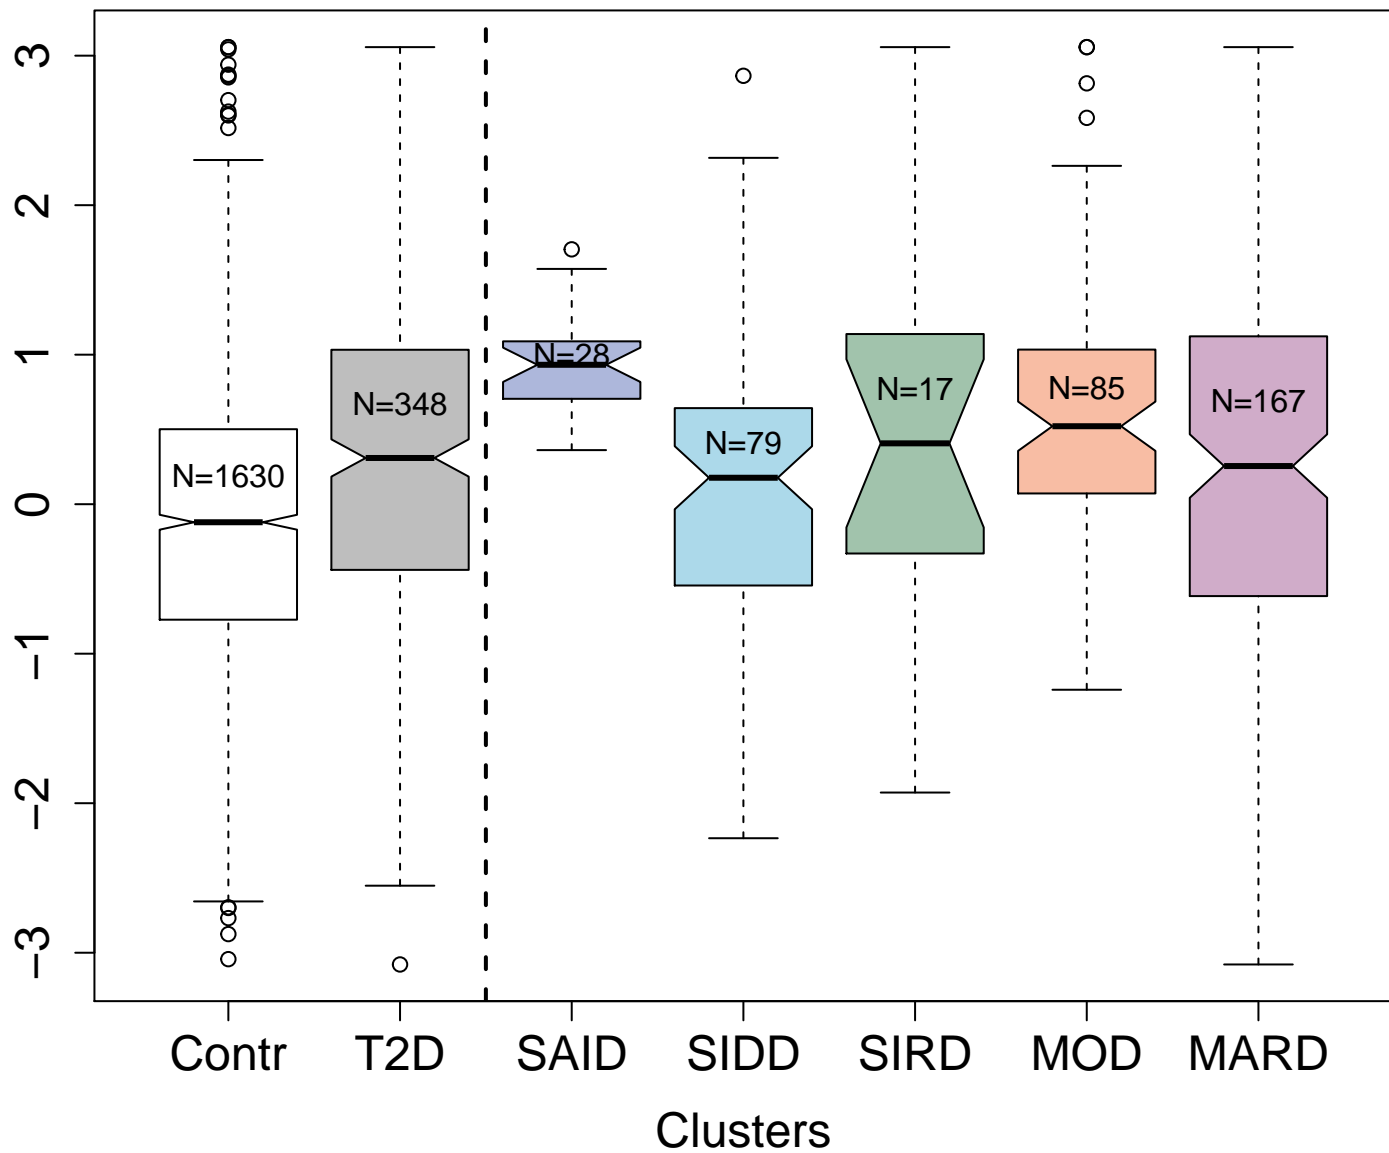

M22176 : cysteine s-sulfate

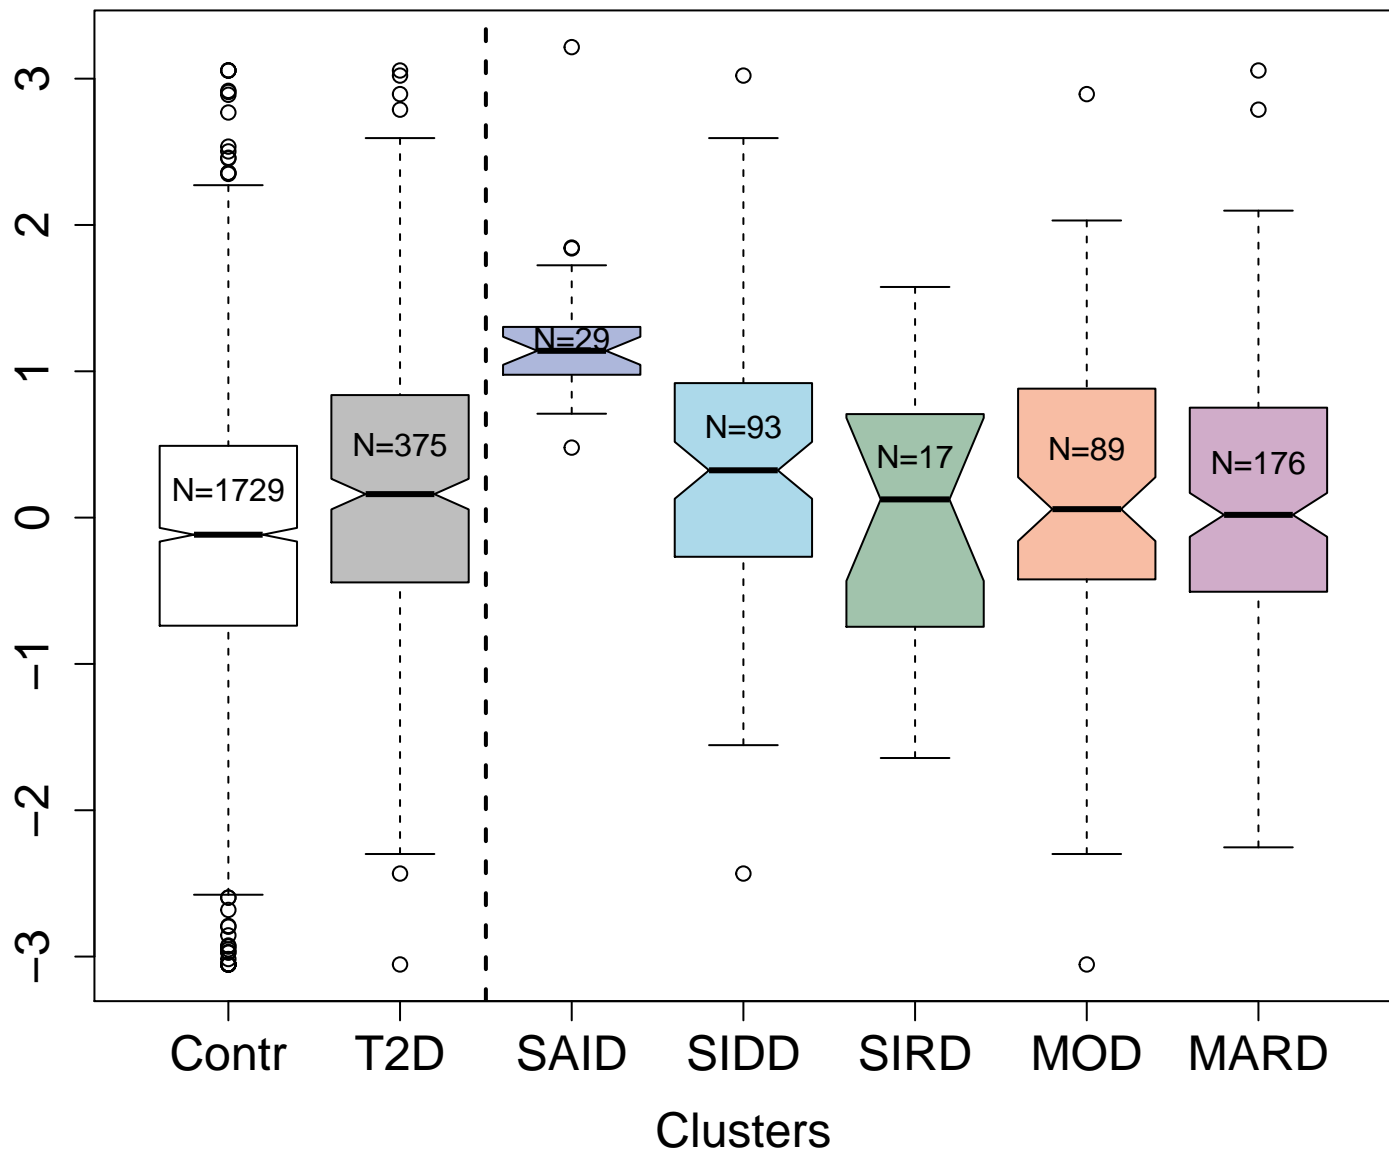

M33968 : 5-dodecenoate (12:1n7)

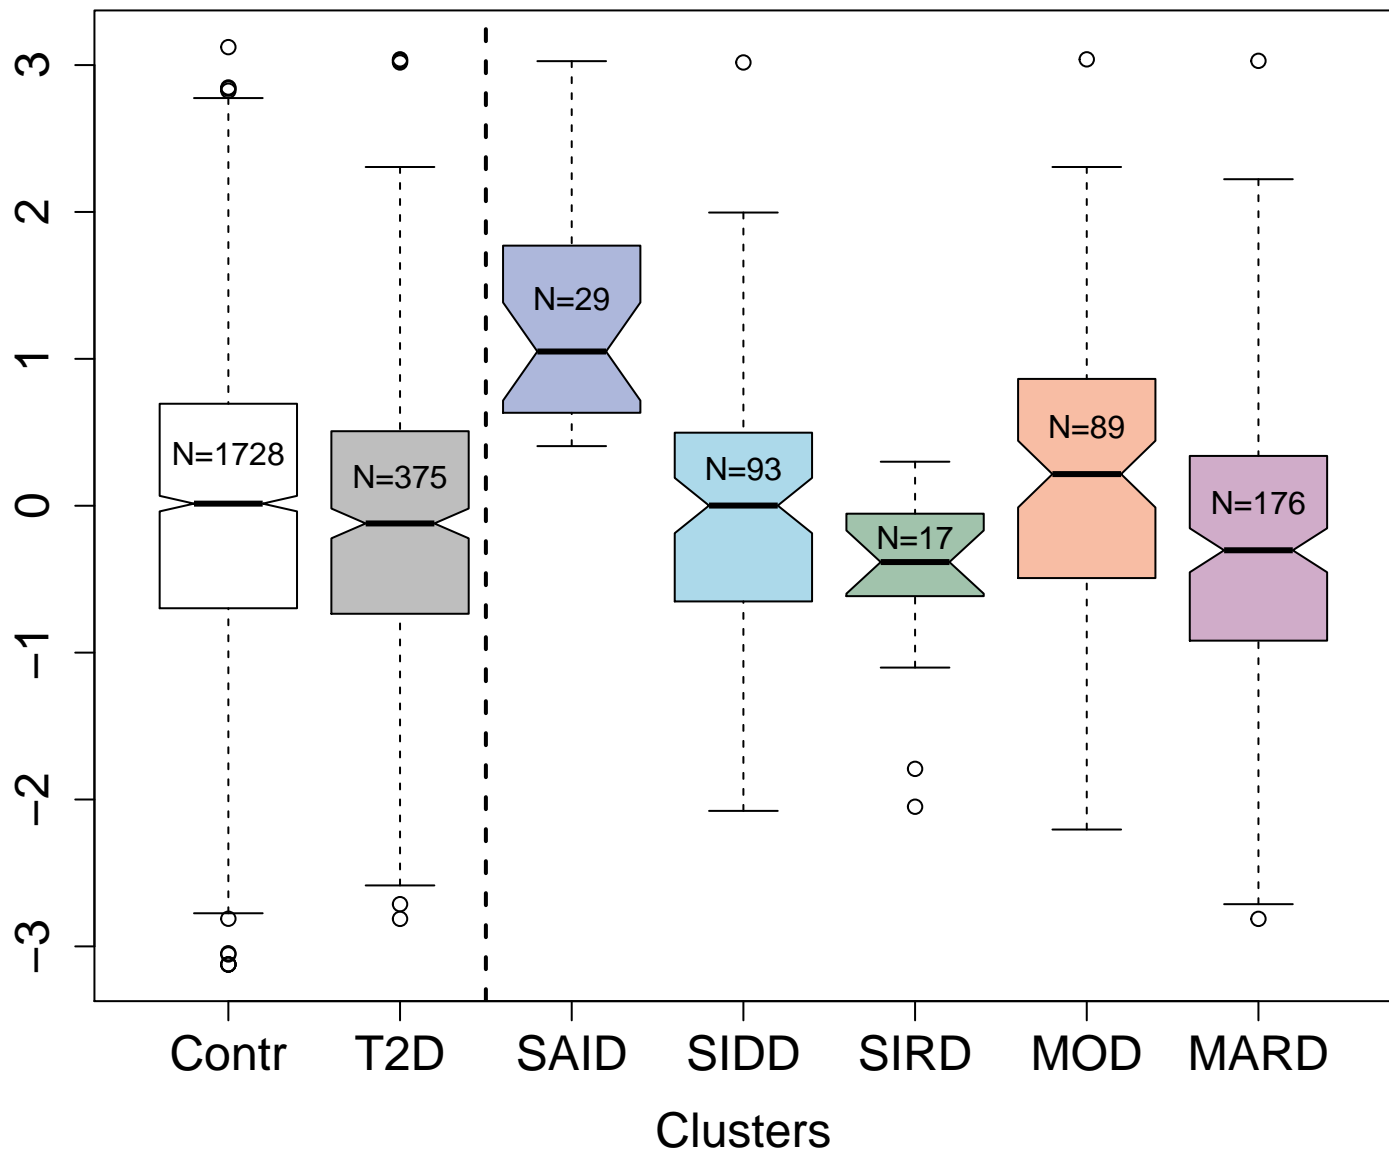



M37200 : 5alpha-pregnan-3beta,20alpha-diol monosulfate (2

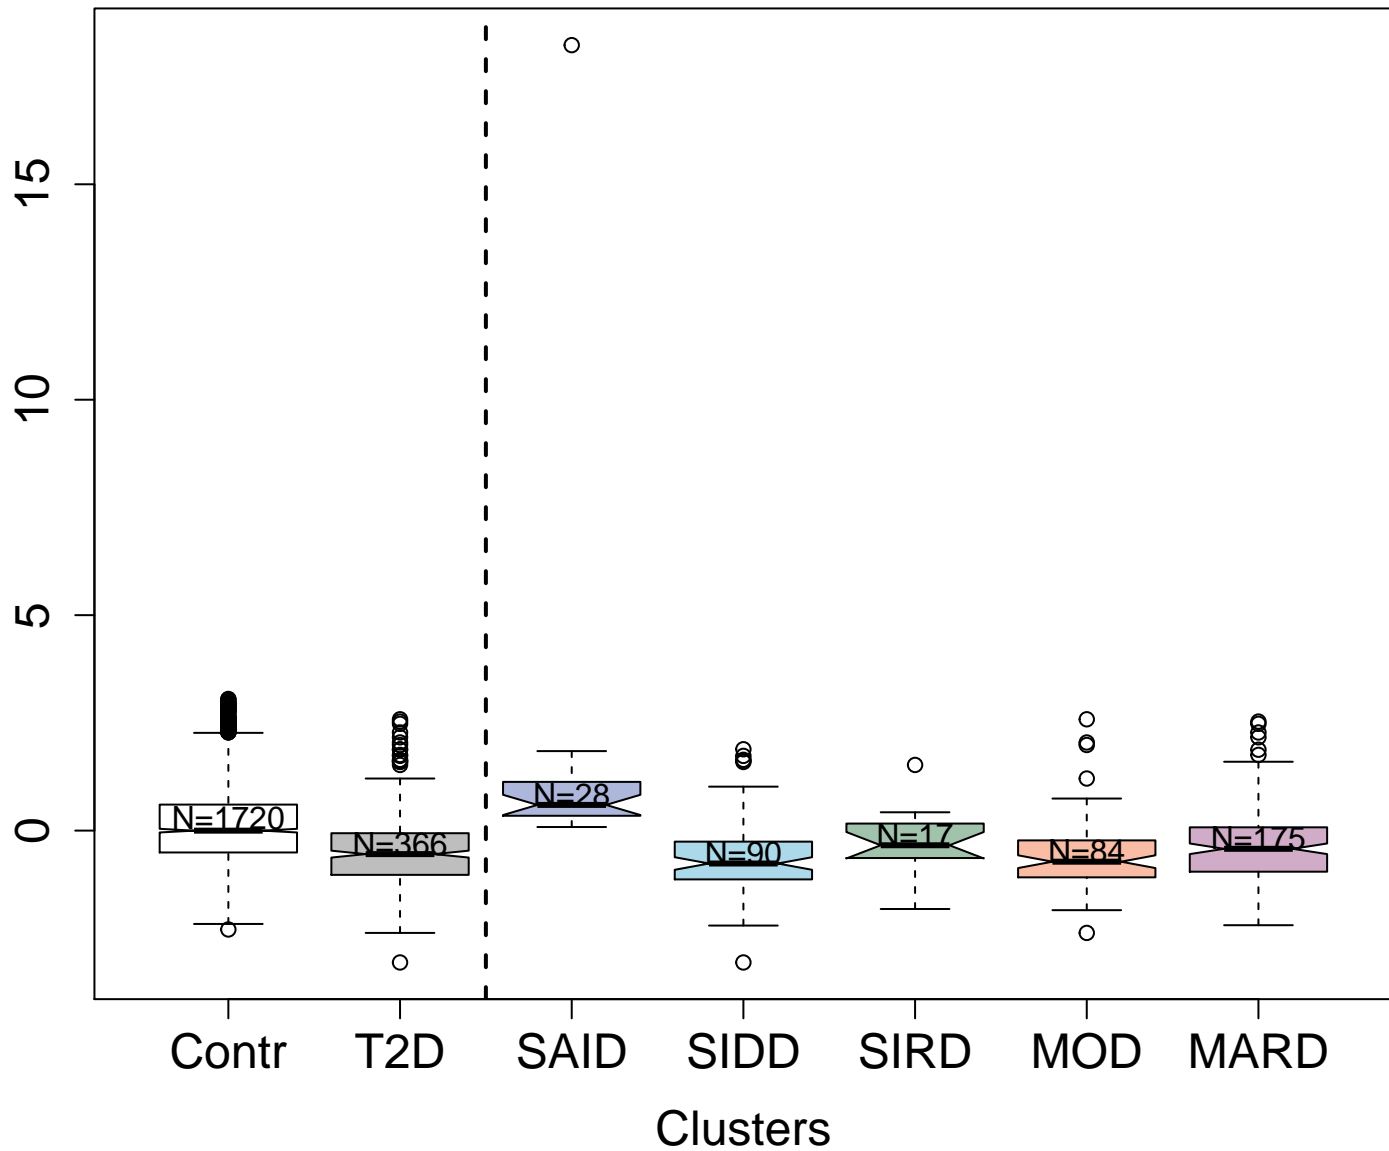

M37752 : 13-HODE + 9-HODE

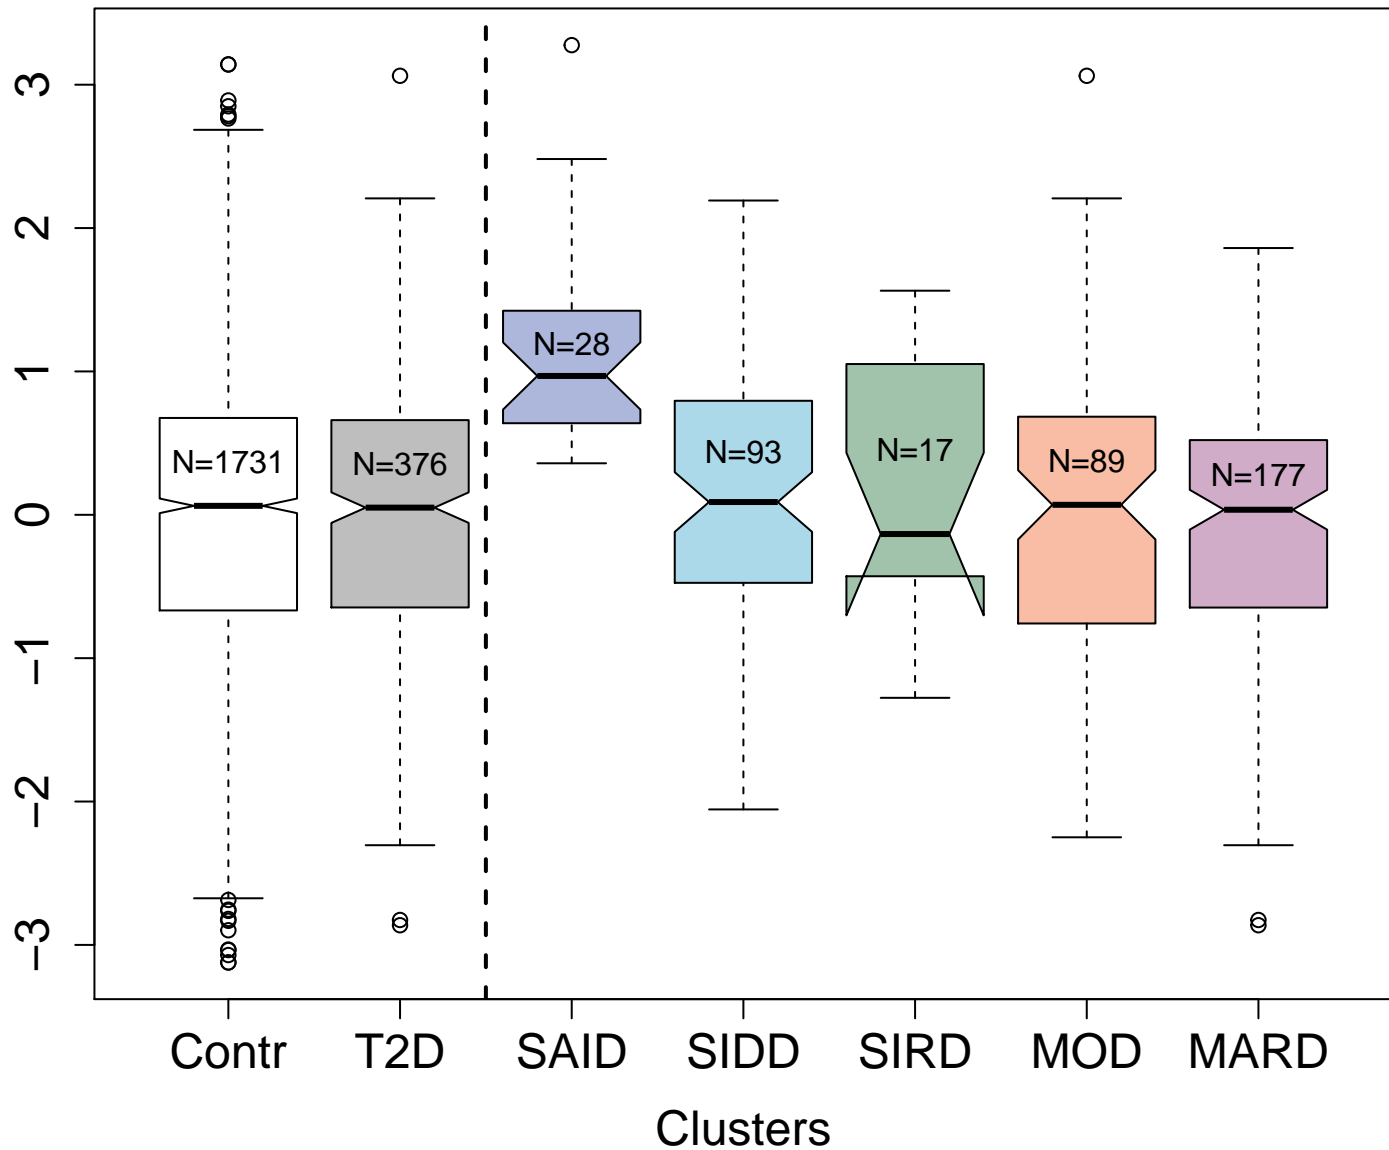

M62291 : glucuronide of piperine metabolite C17H21NO3 (4)

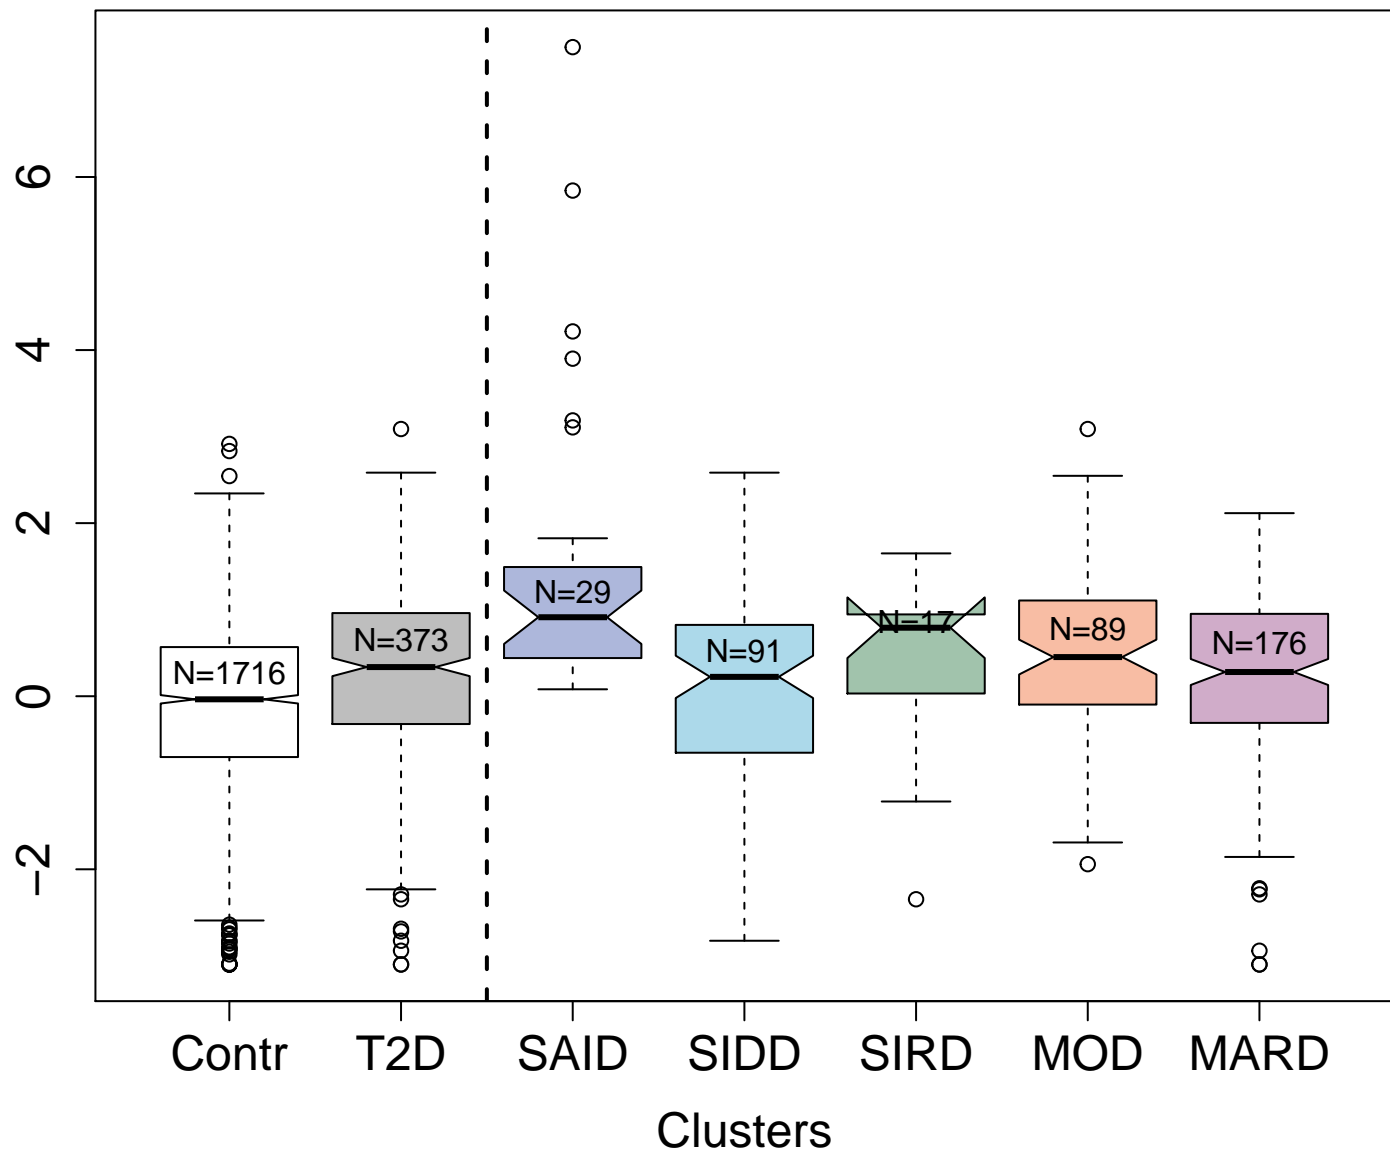

M63560 : X - 25790

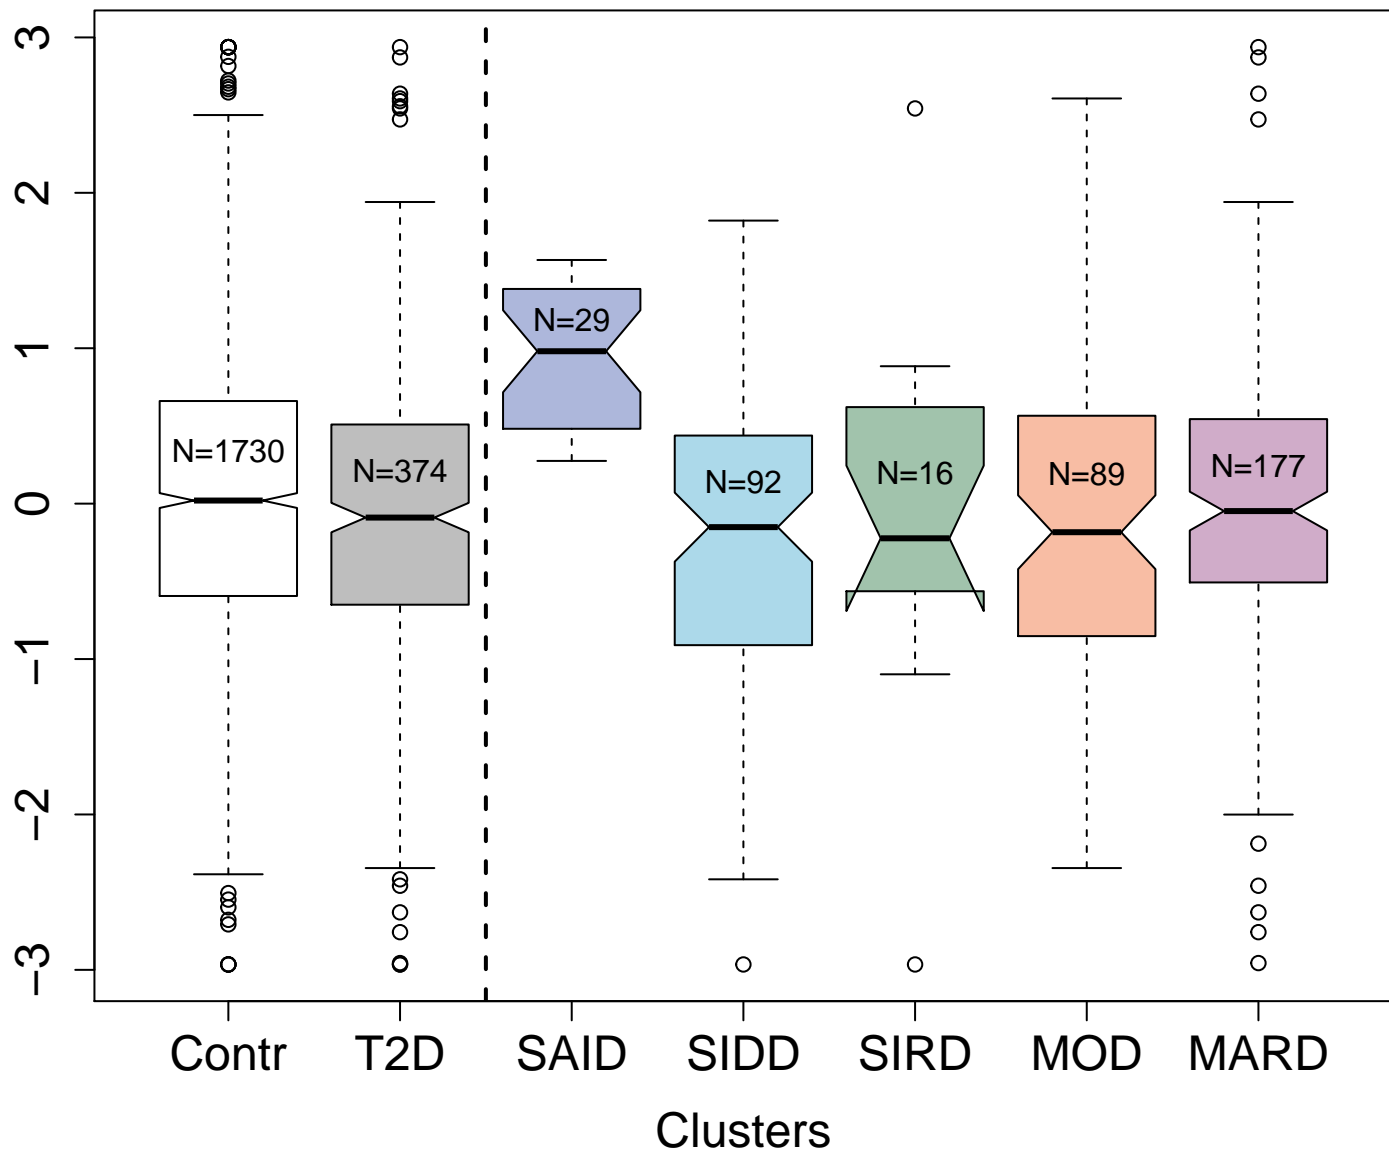

M43378 : S-methylcysteine sulfoxide

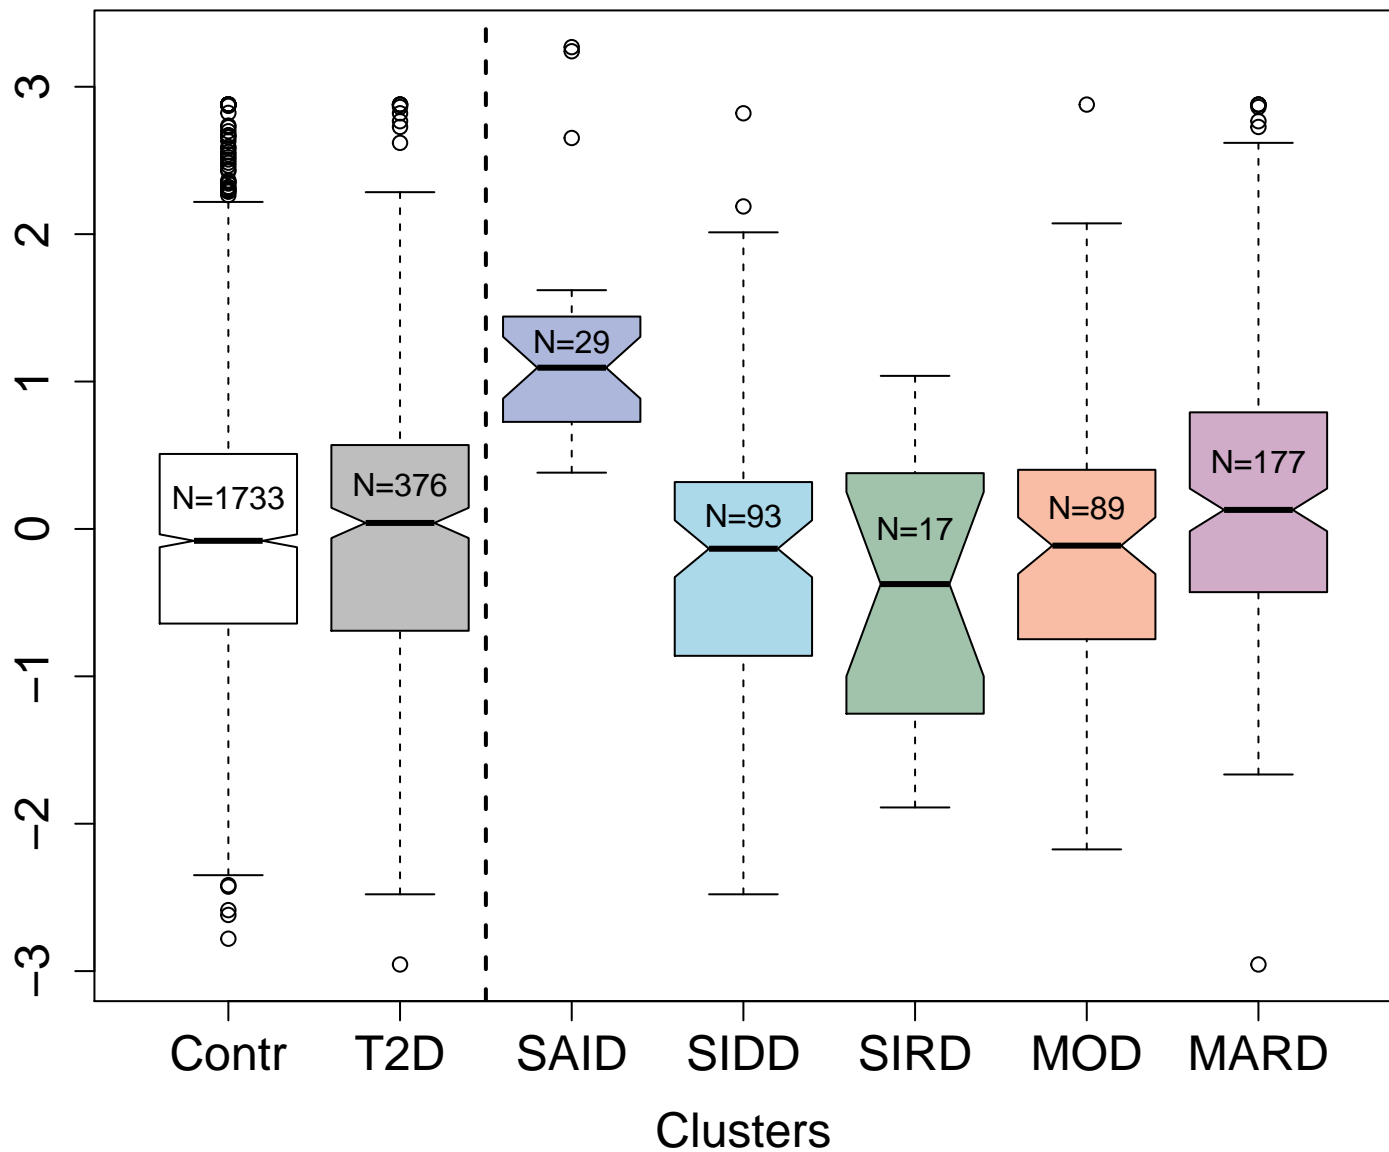

M52449 : 1-stearoyl-2-arachidonoyl-GPI (18:0/20:4)

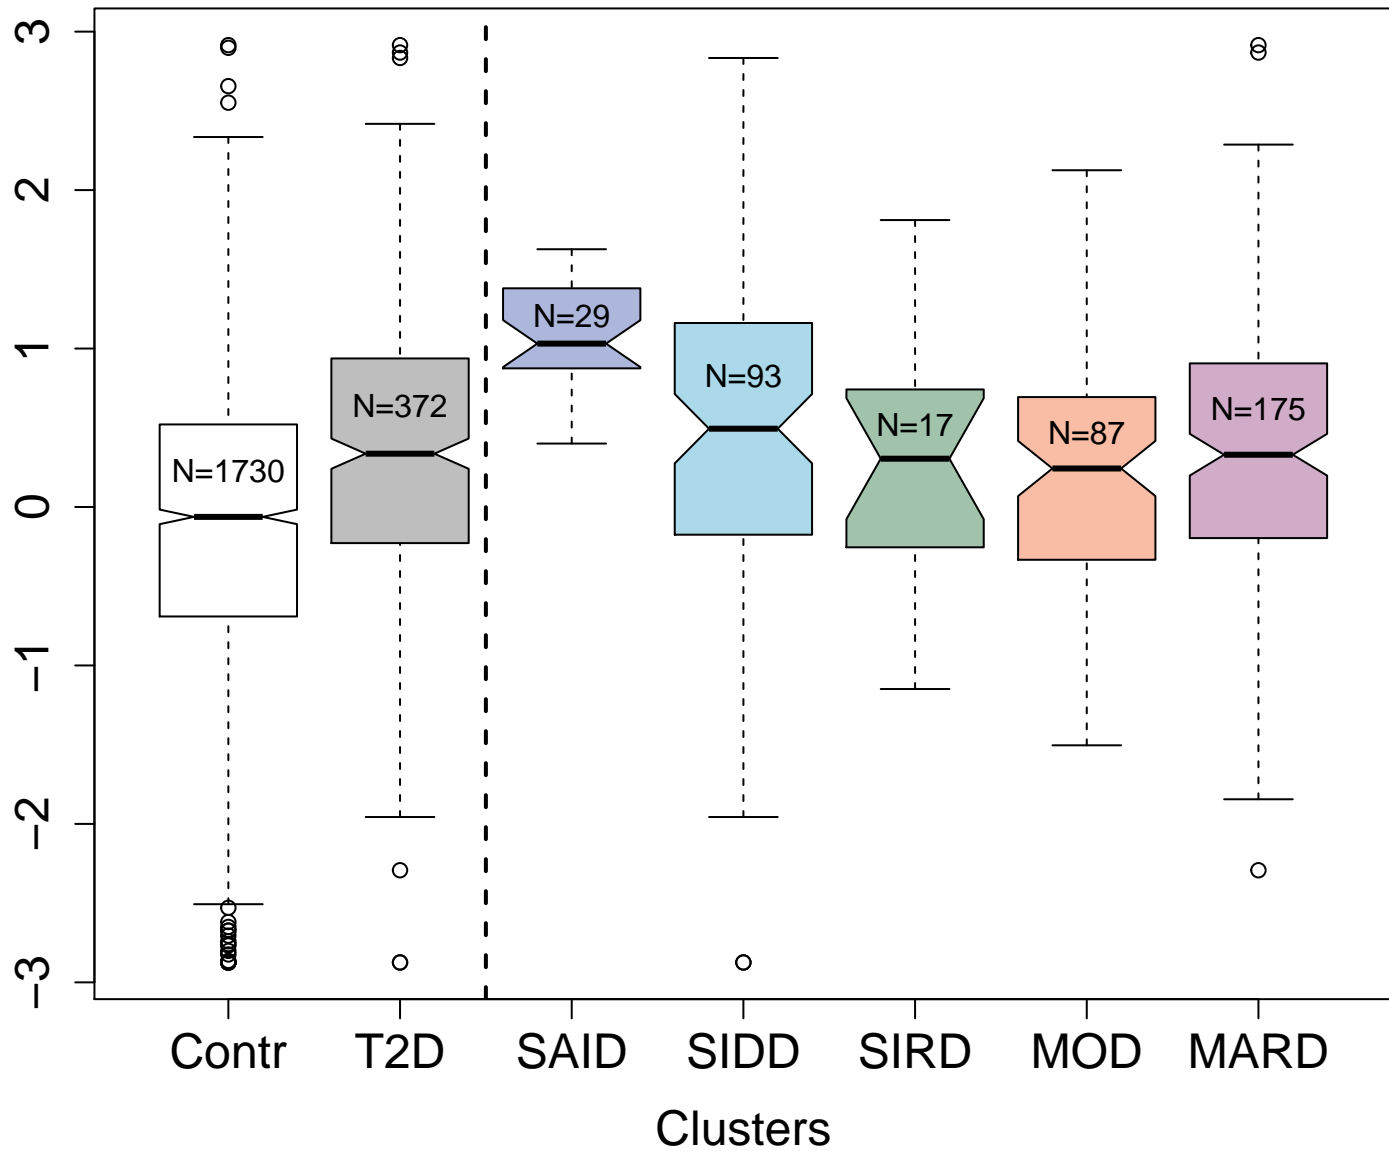

M62071 : perfluorooctanoate (PFOA)

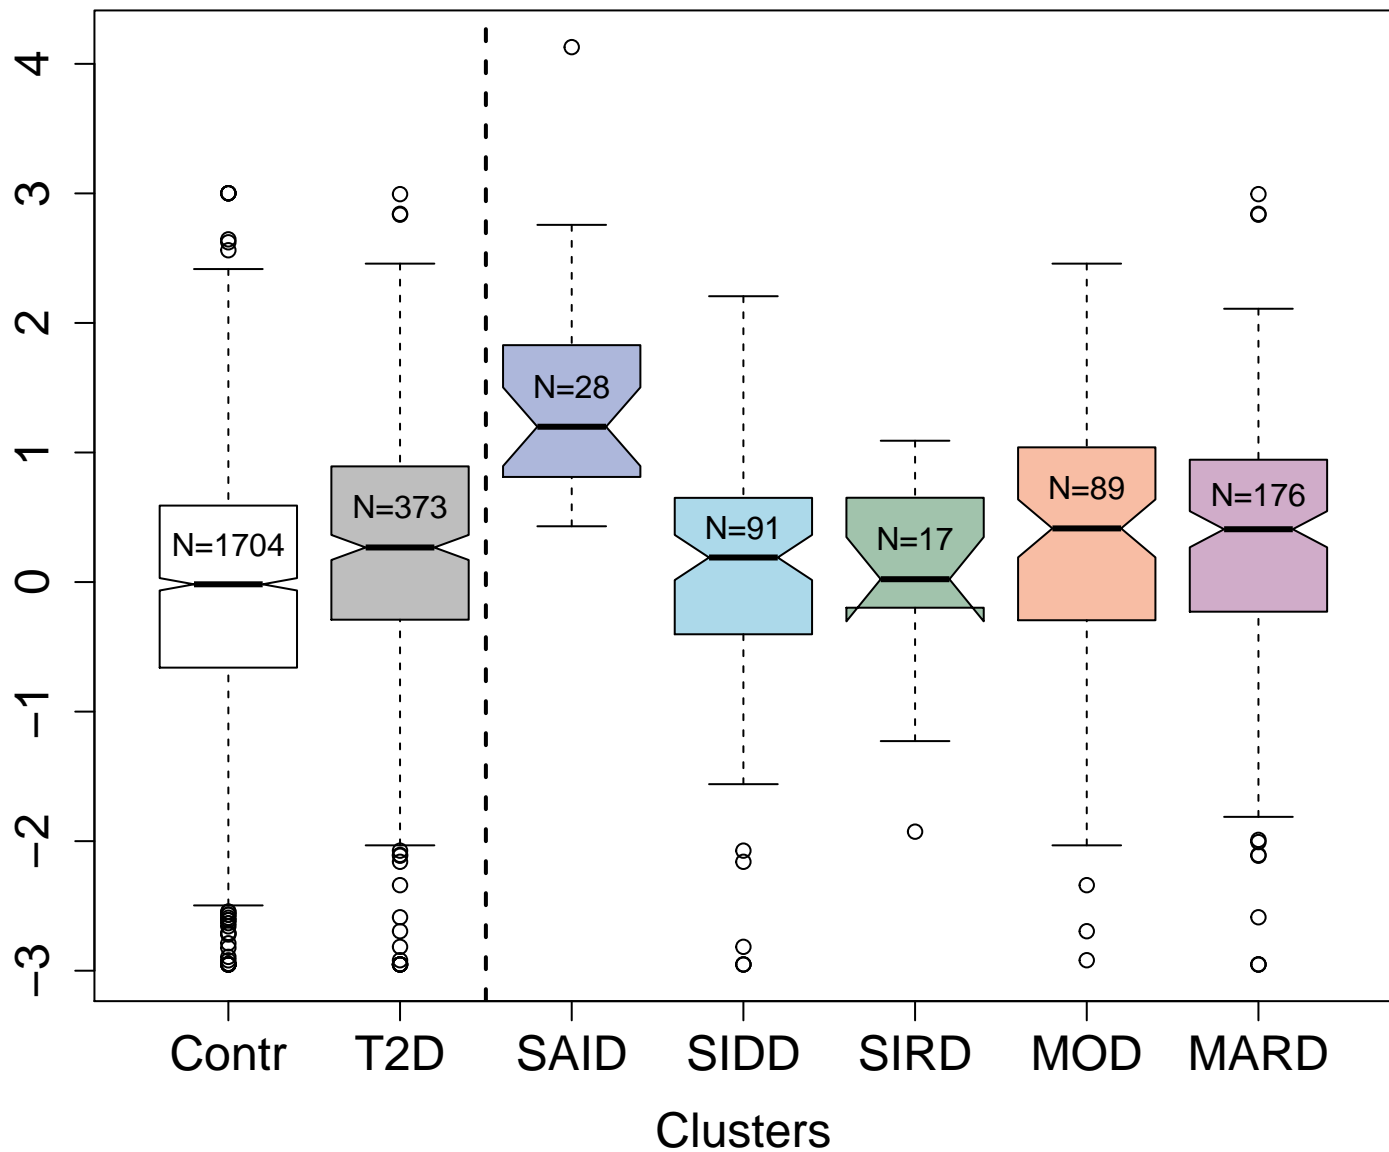

M39609 : 16-hydroxypalmitate

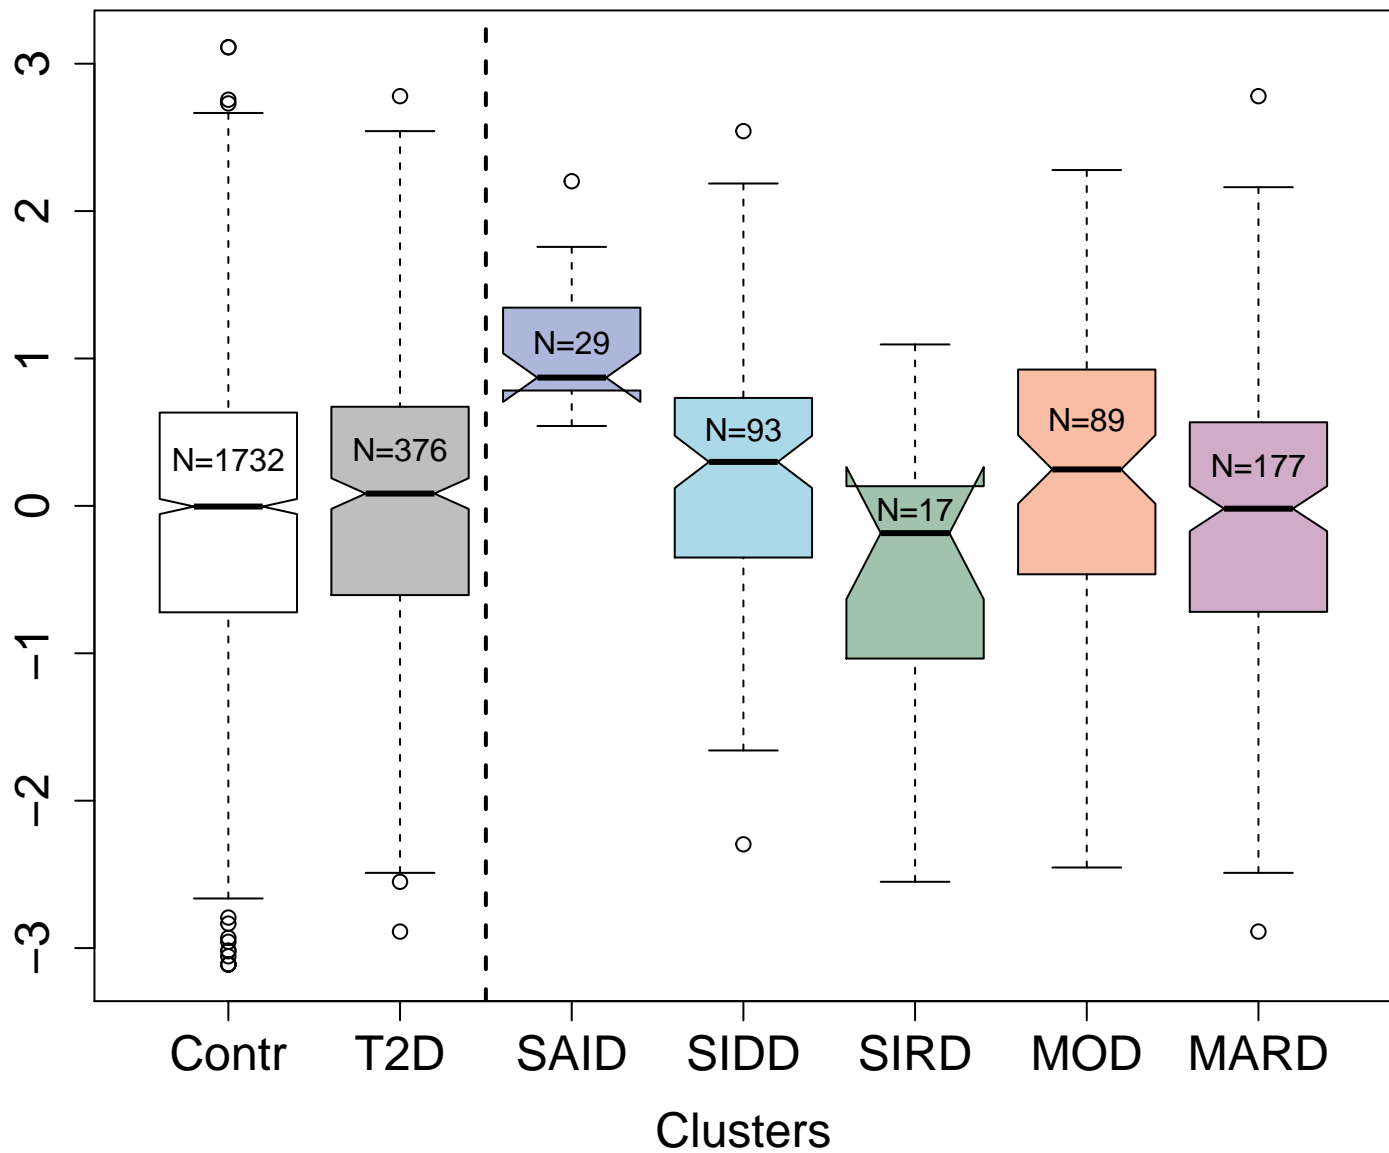



M43249 : N-delta-acetylornithine

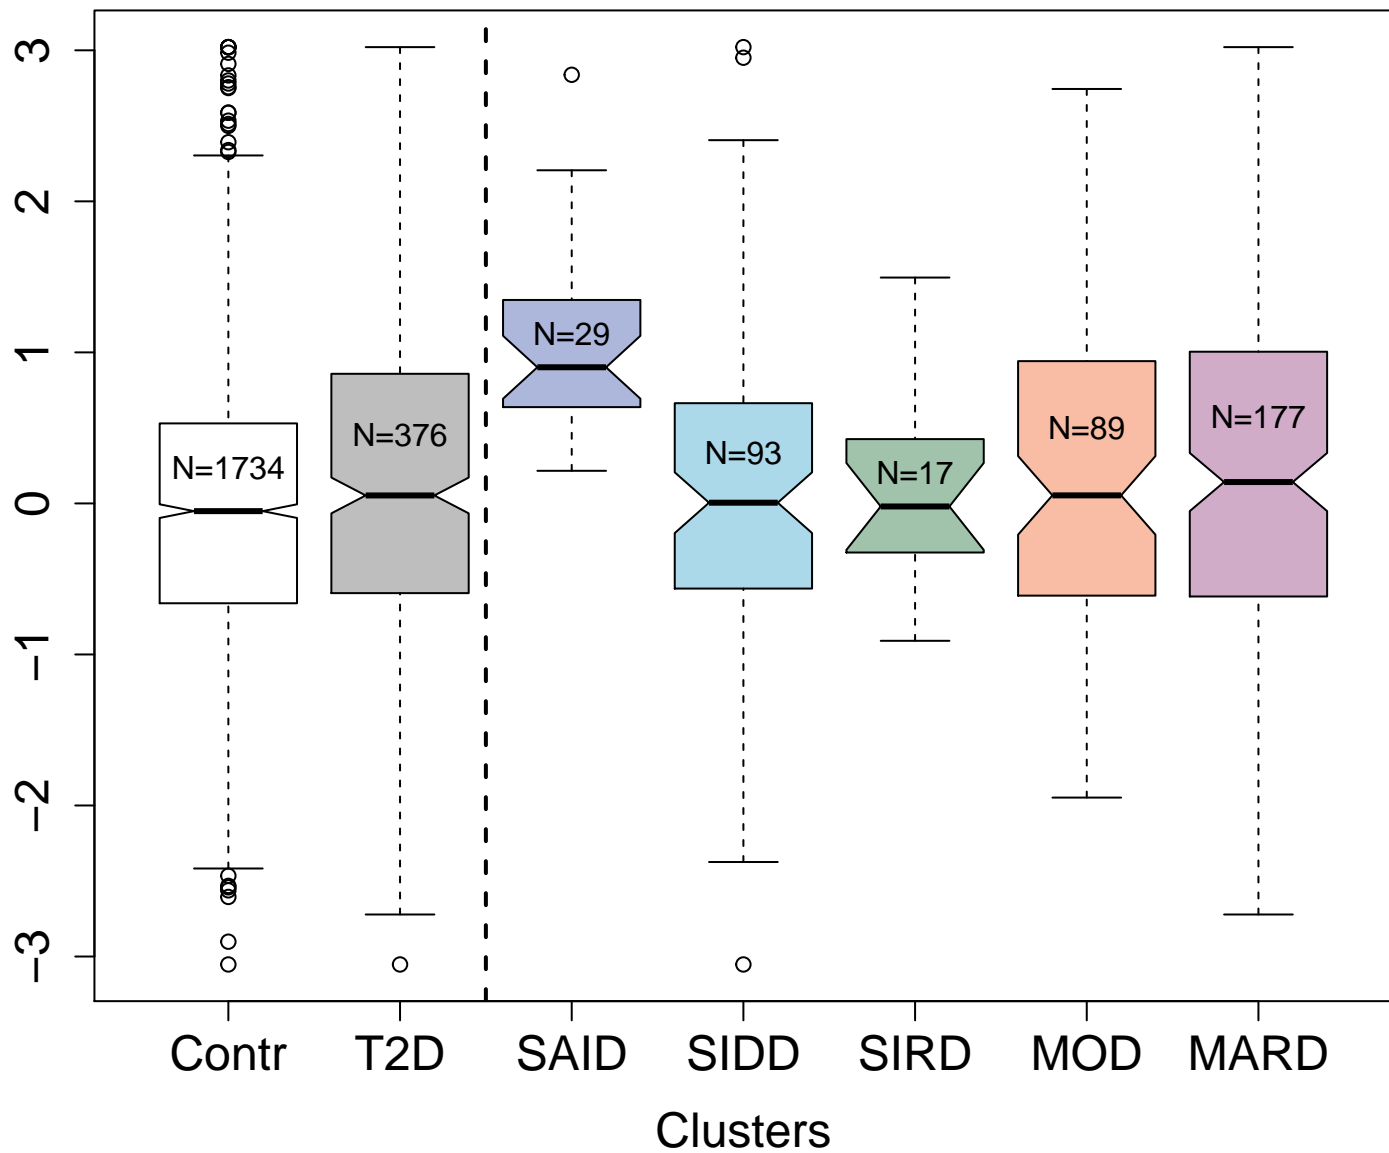

M63120 : 2-ketocaprylate

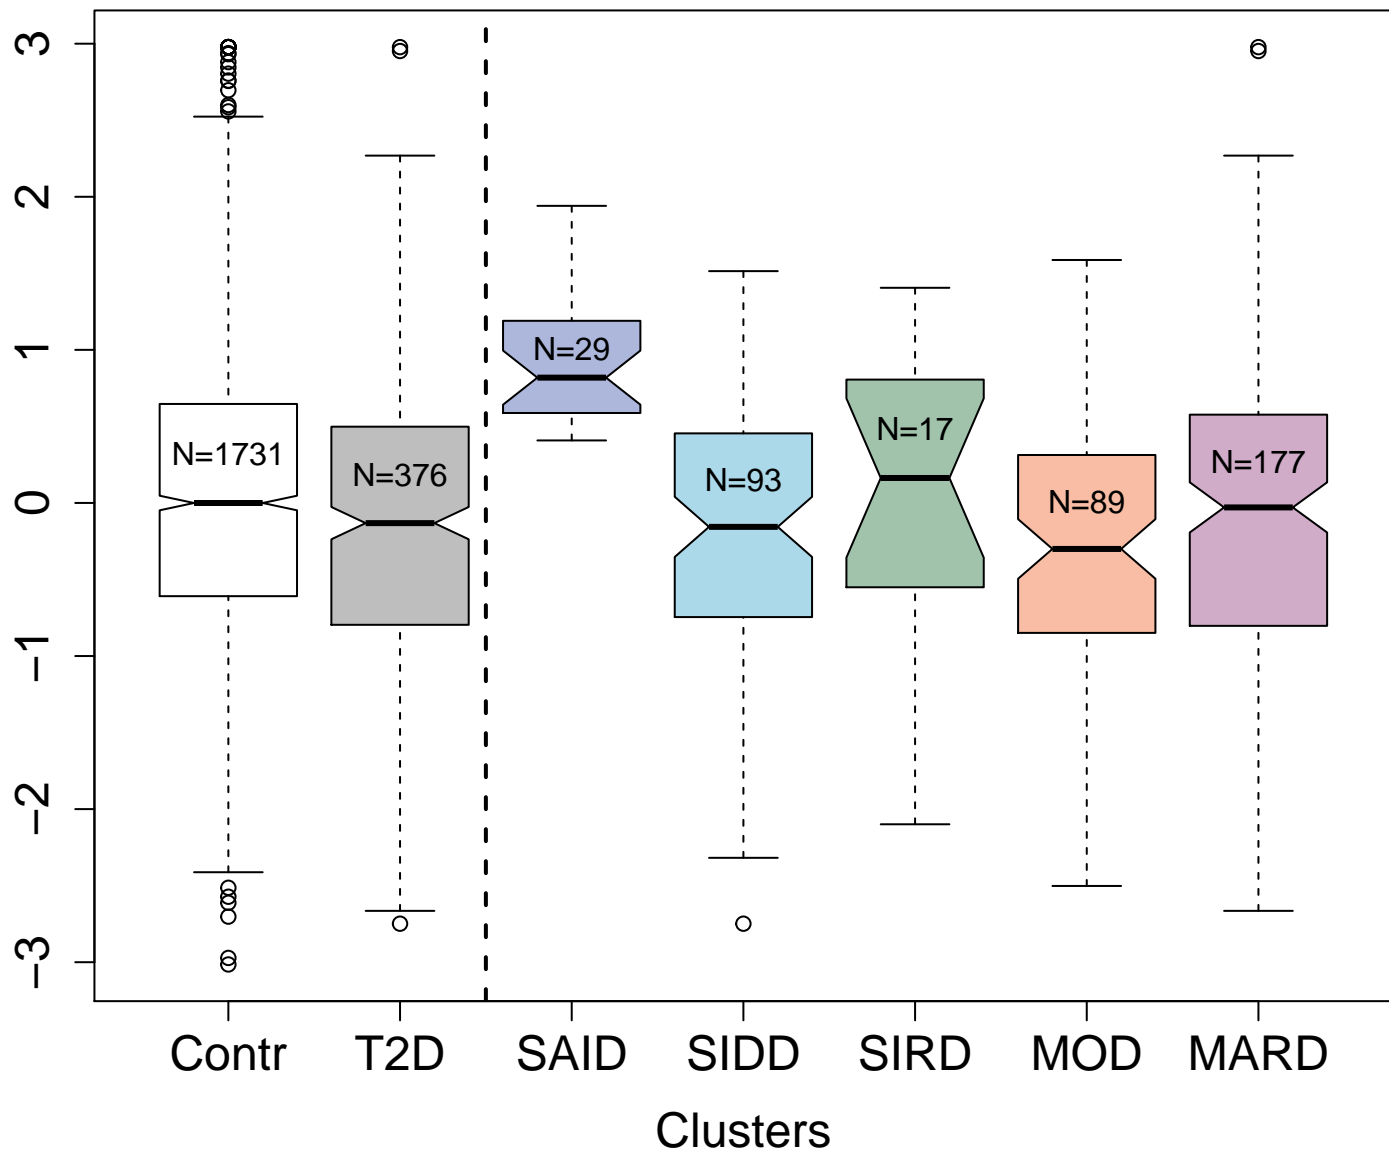

M35320 : catechol sulfate

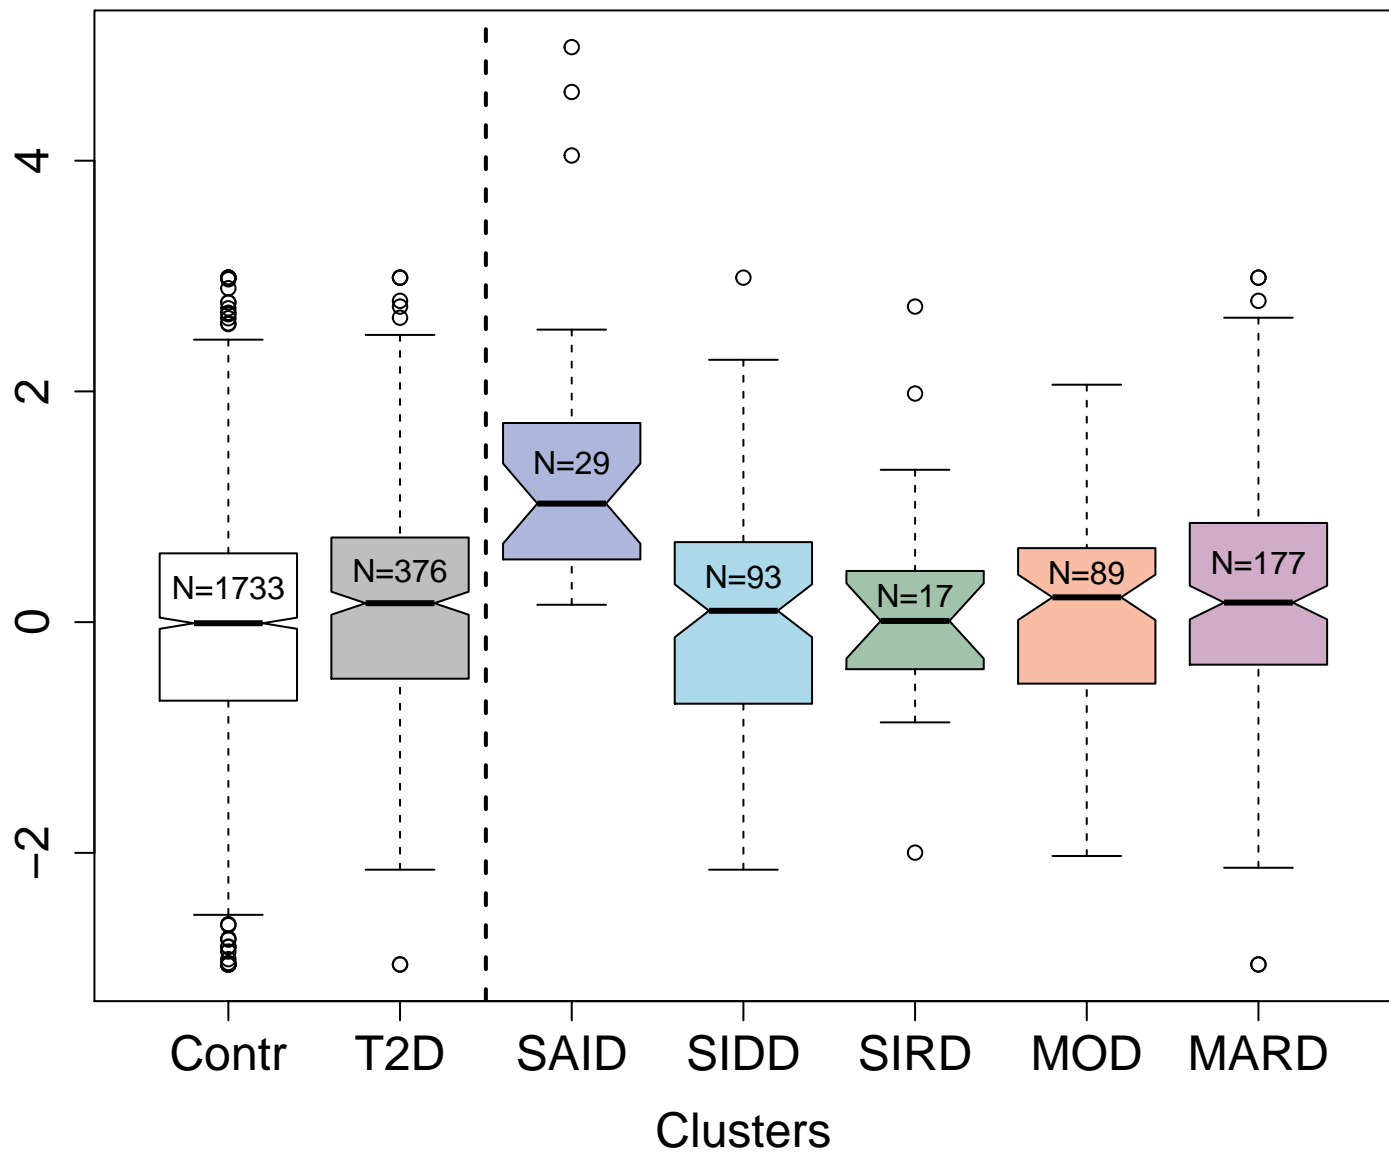

M33946 : N-acetylhistidine

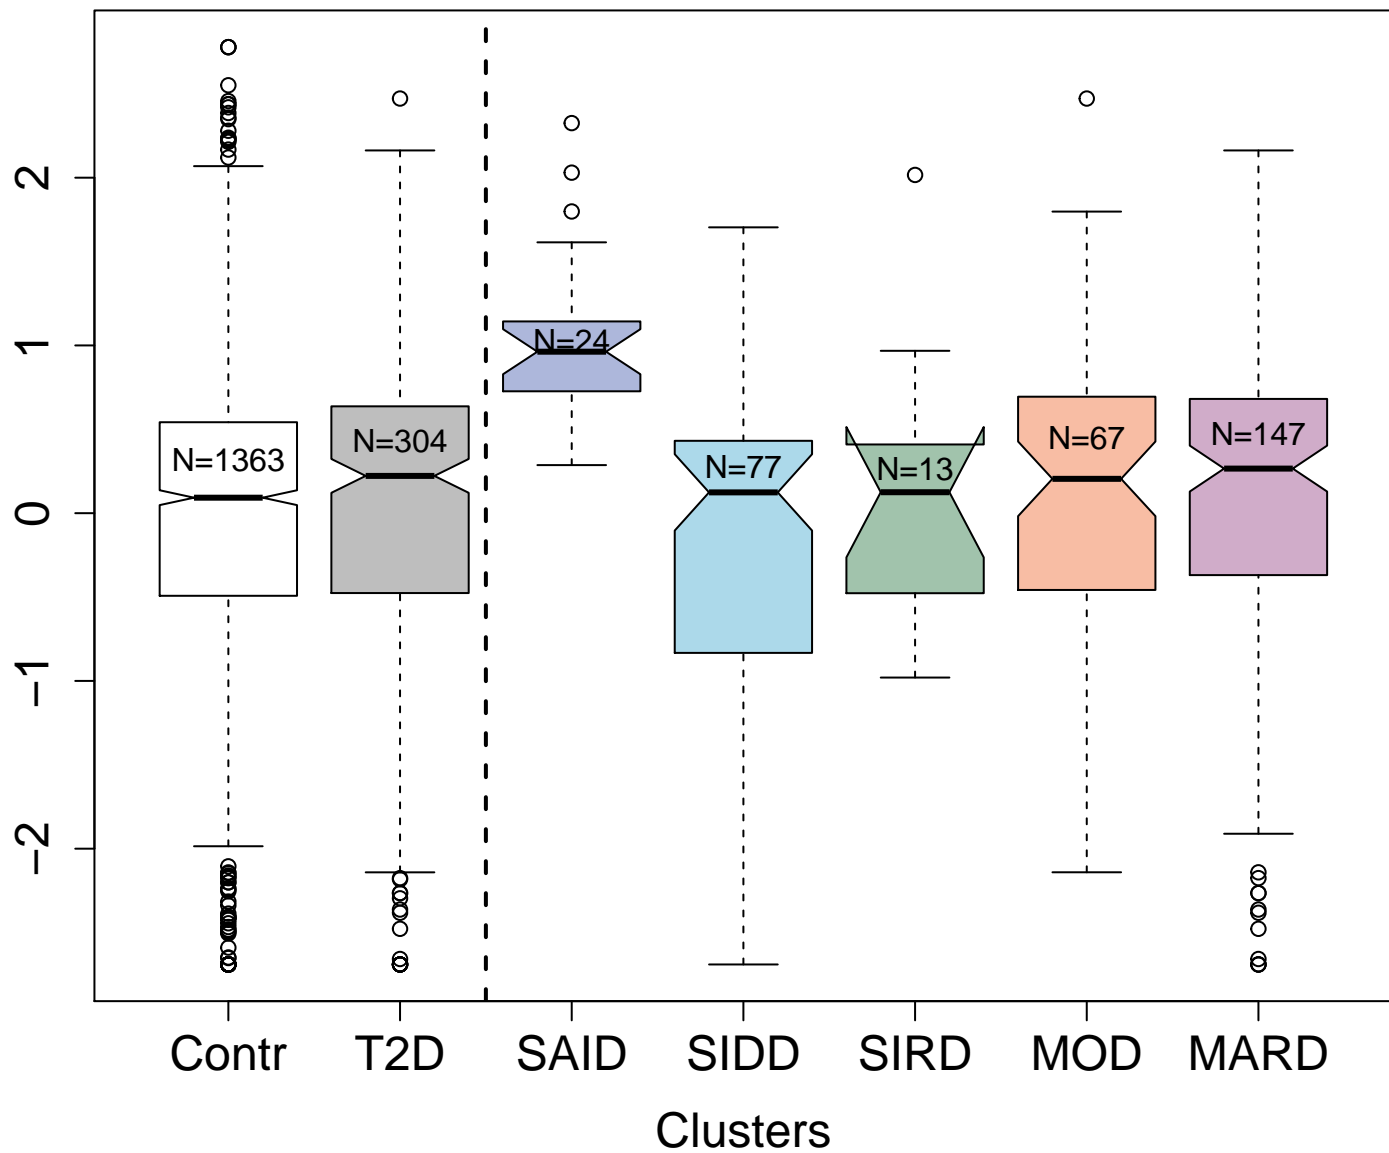

M48394 : pregnanolone/allopregnanolone sulfate

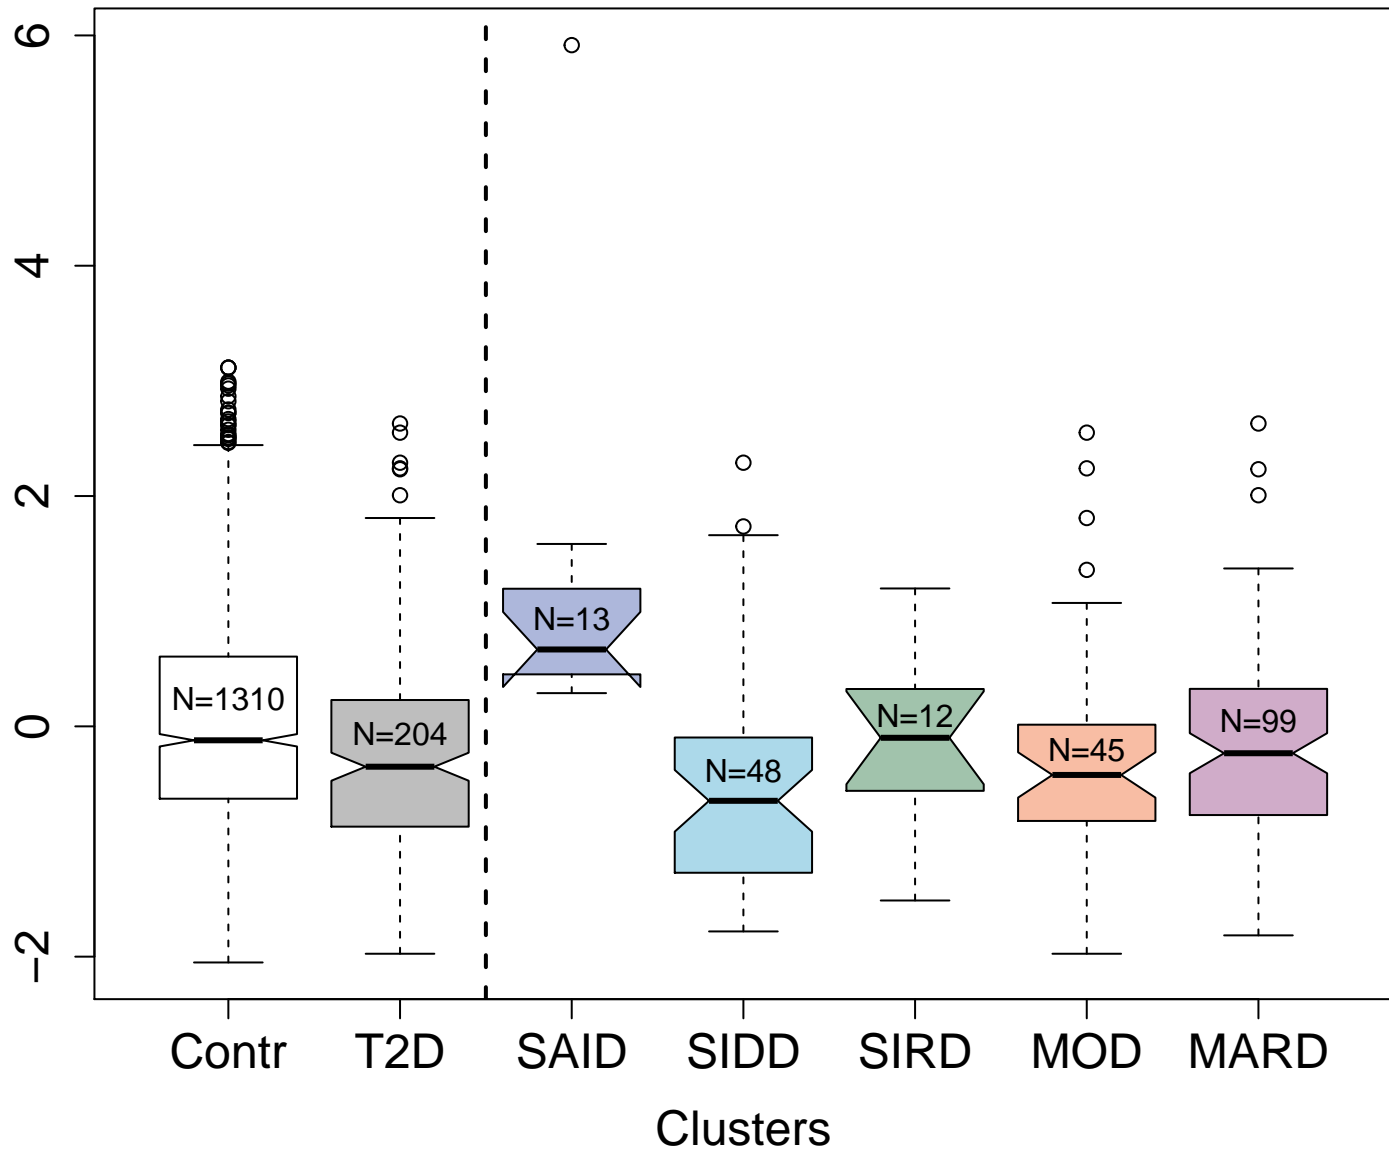

M19263 : 1-palmitoyl-2-oleoyl-GPE (16:0/18:1)

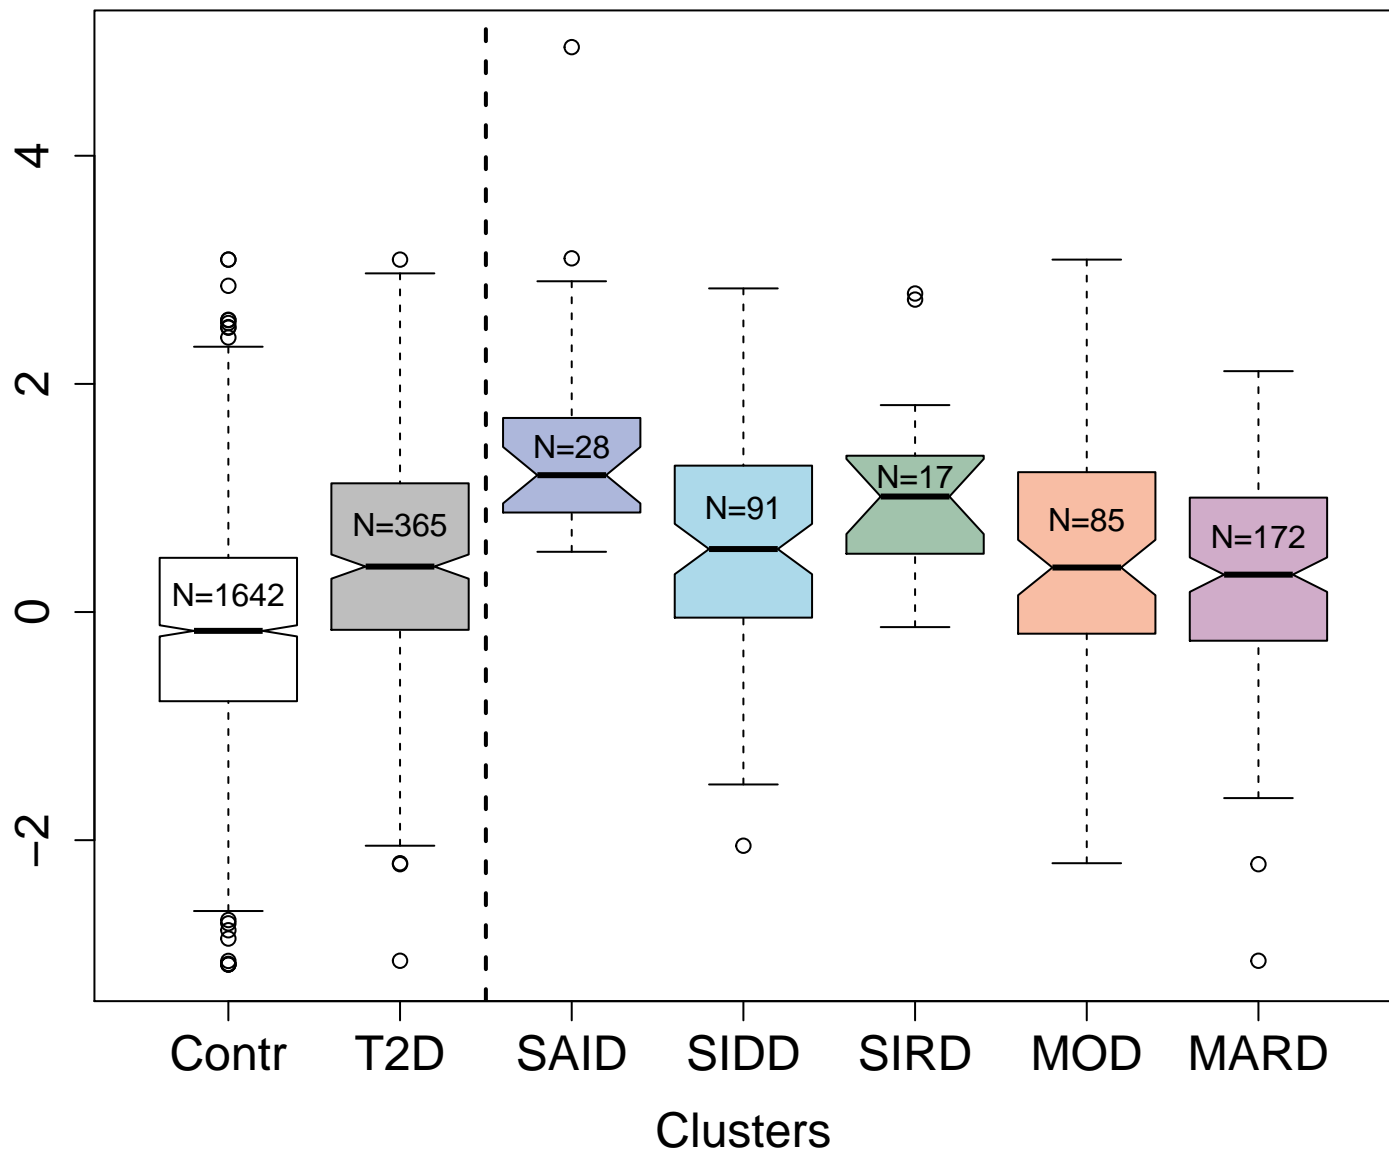

M528 : alpha-ketoglutarate

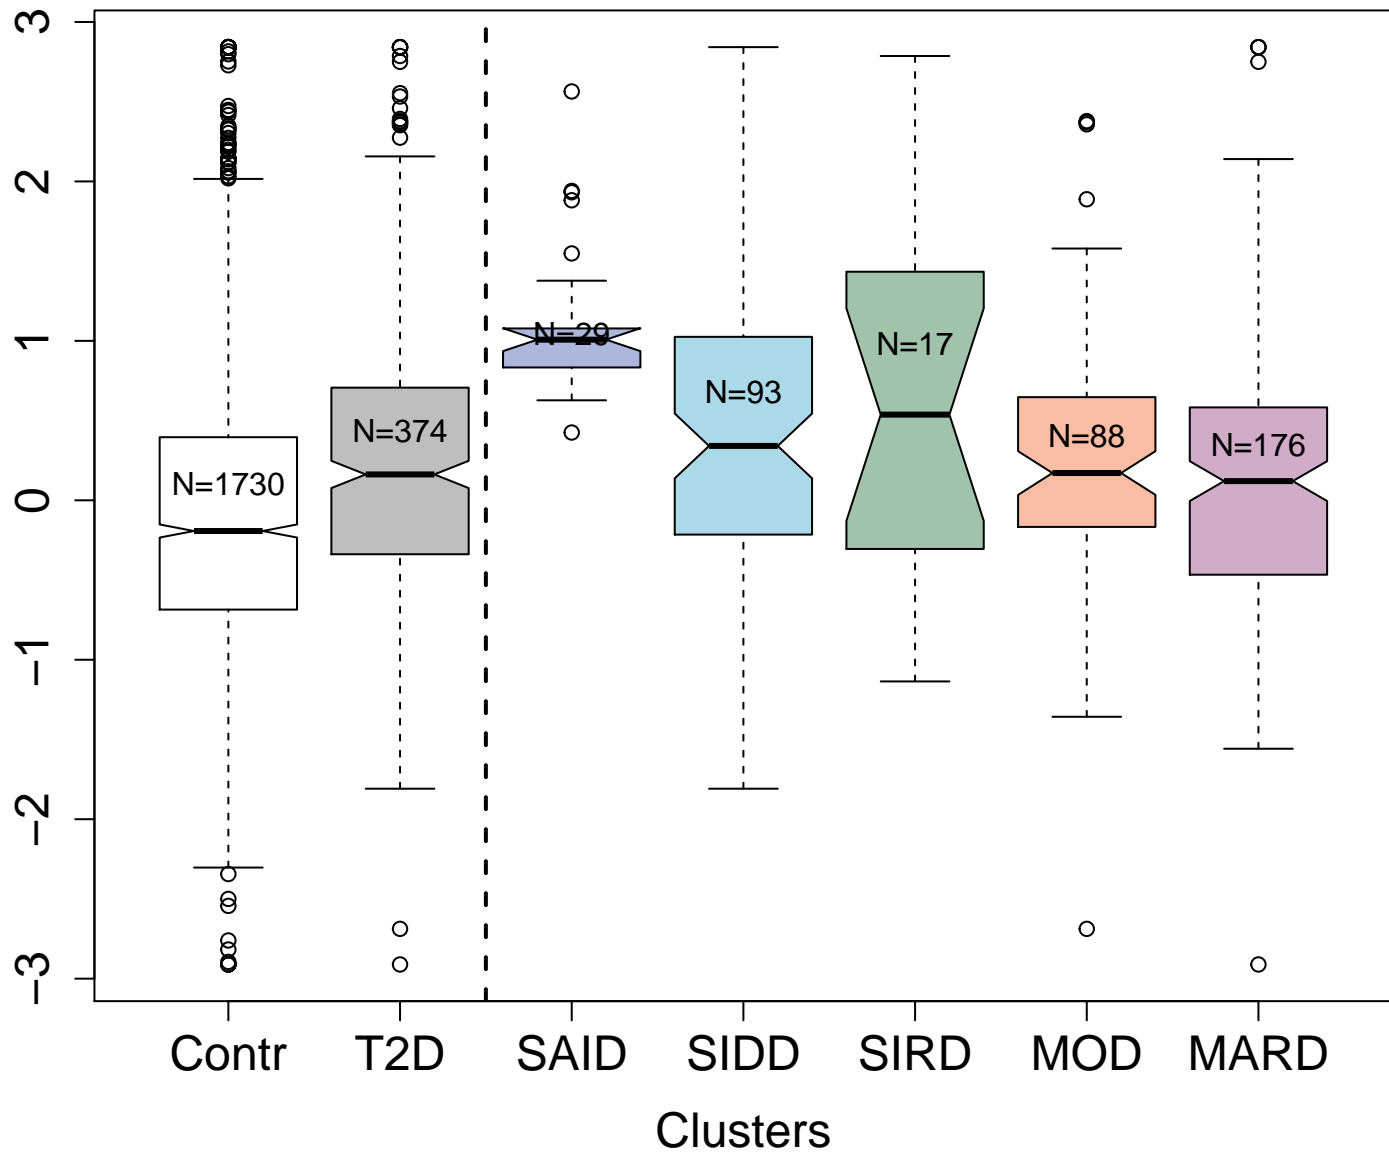

M37092 : gamma-glutamyl-2-aminobutyrate

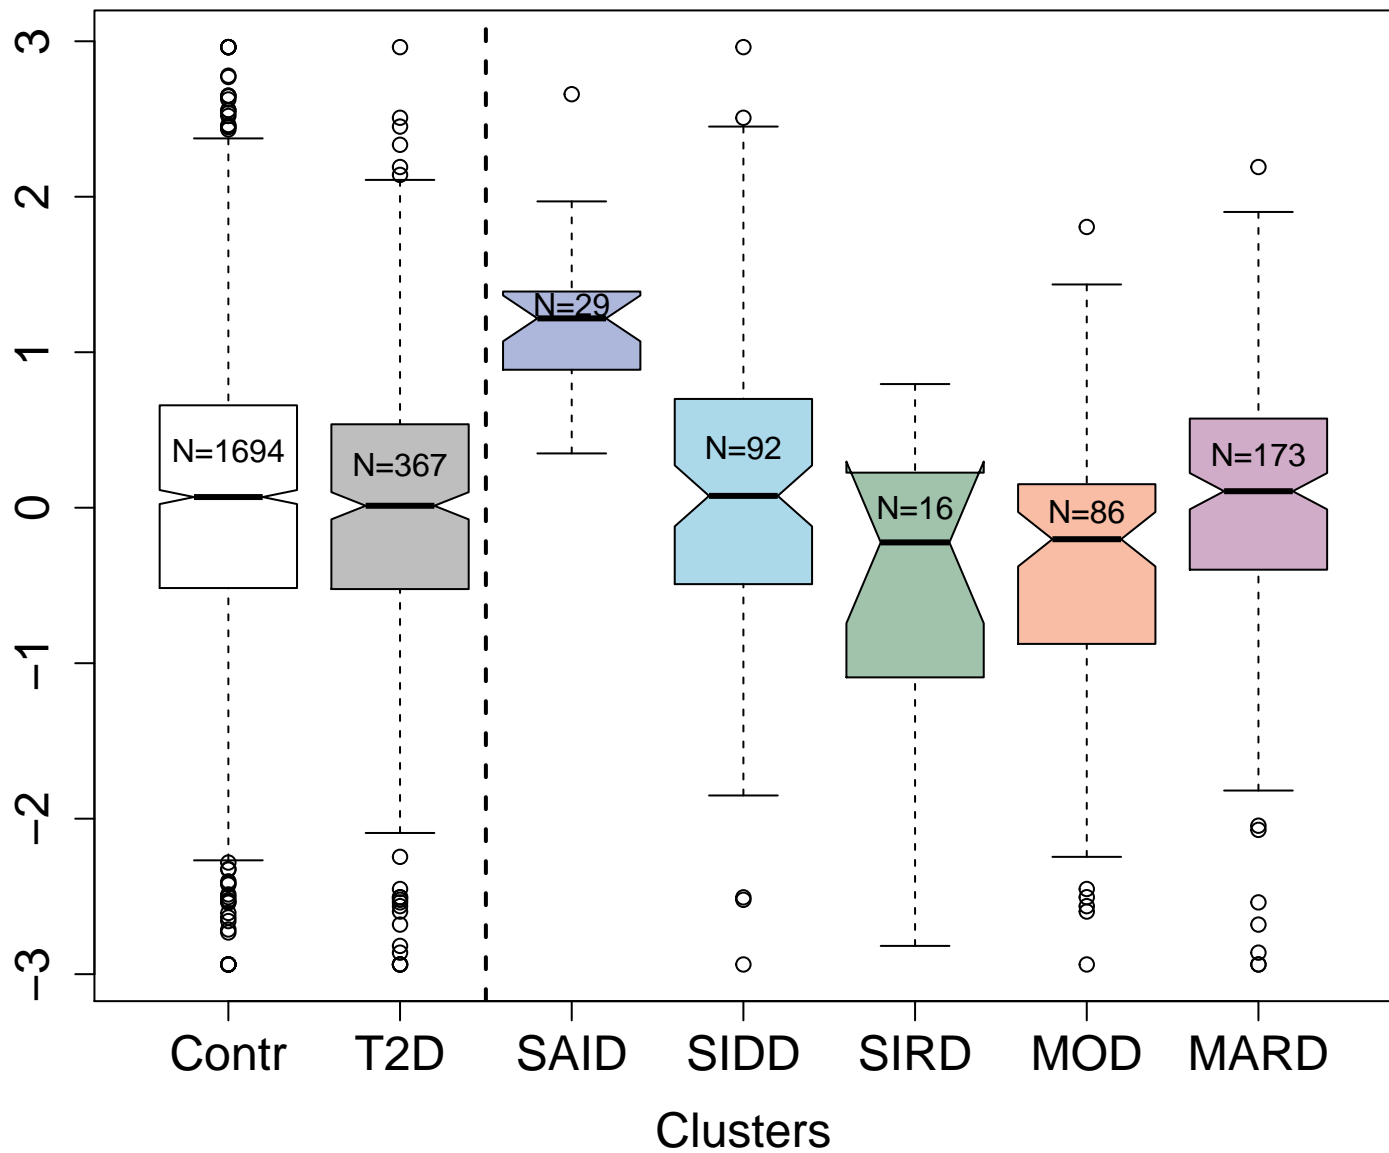



M40473 : hydantoin-5-propionate

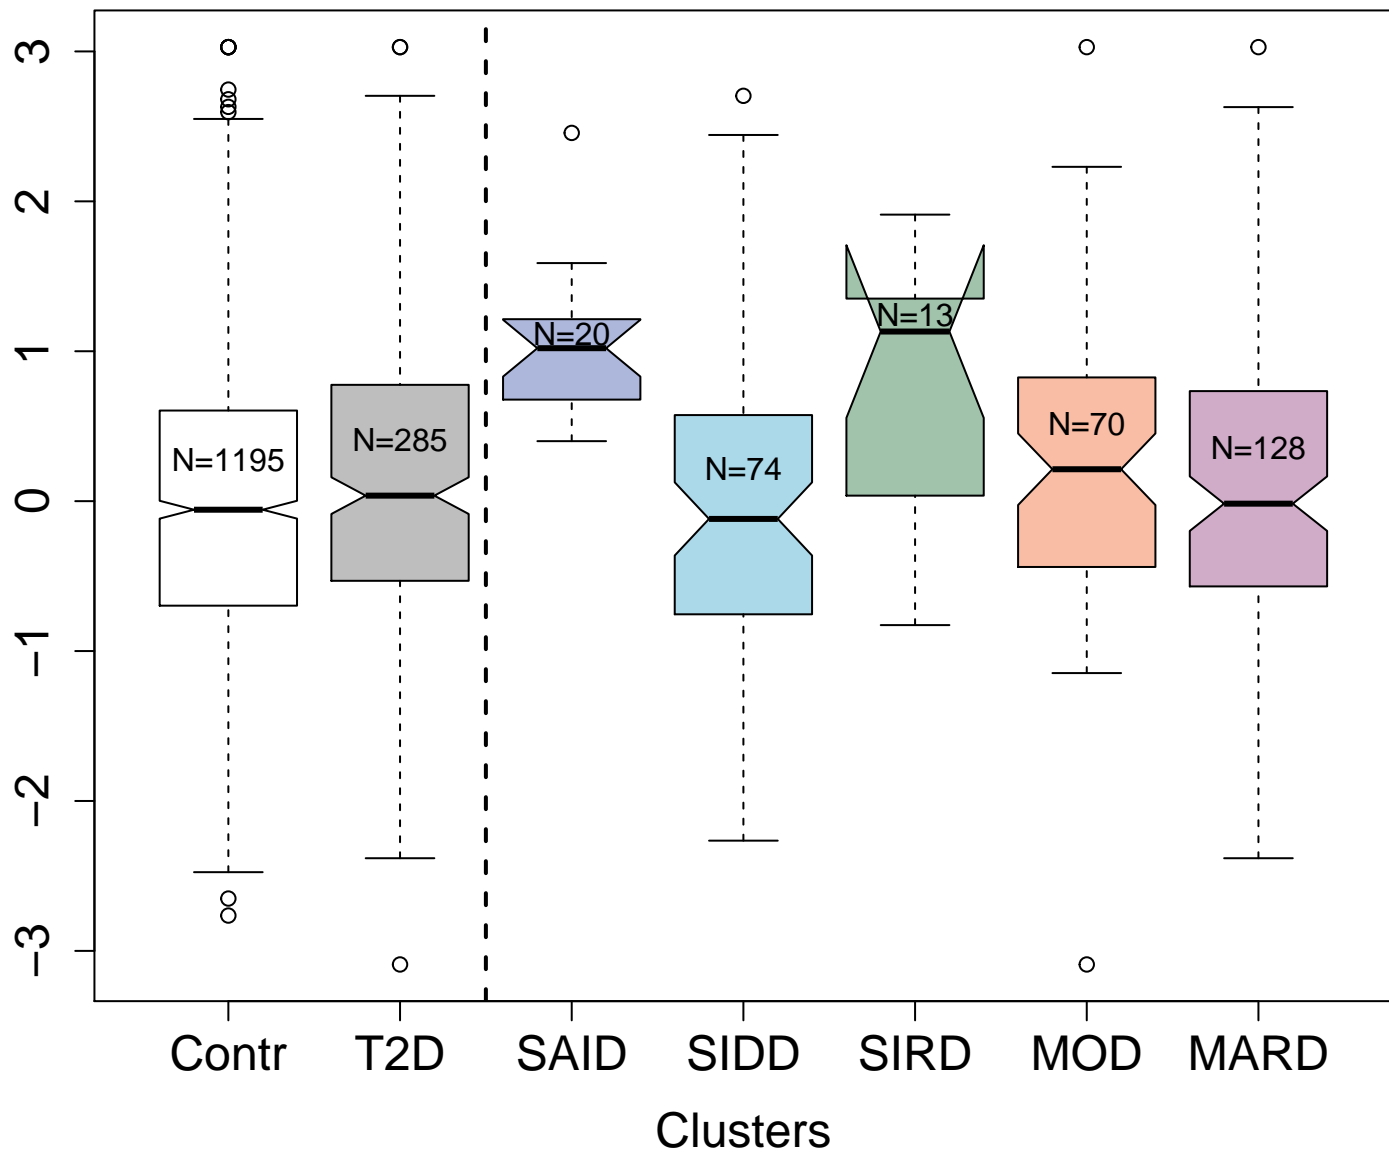

M31536 : N-(2-fuoyl)glycine

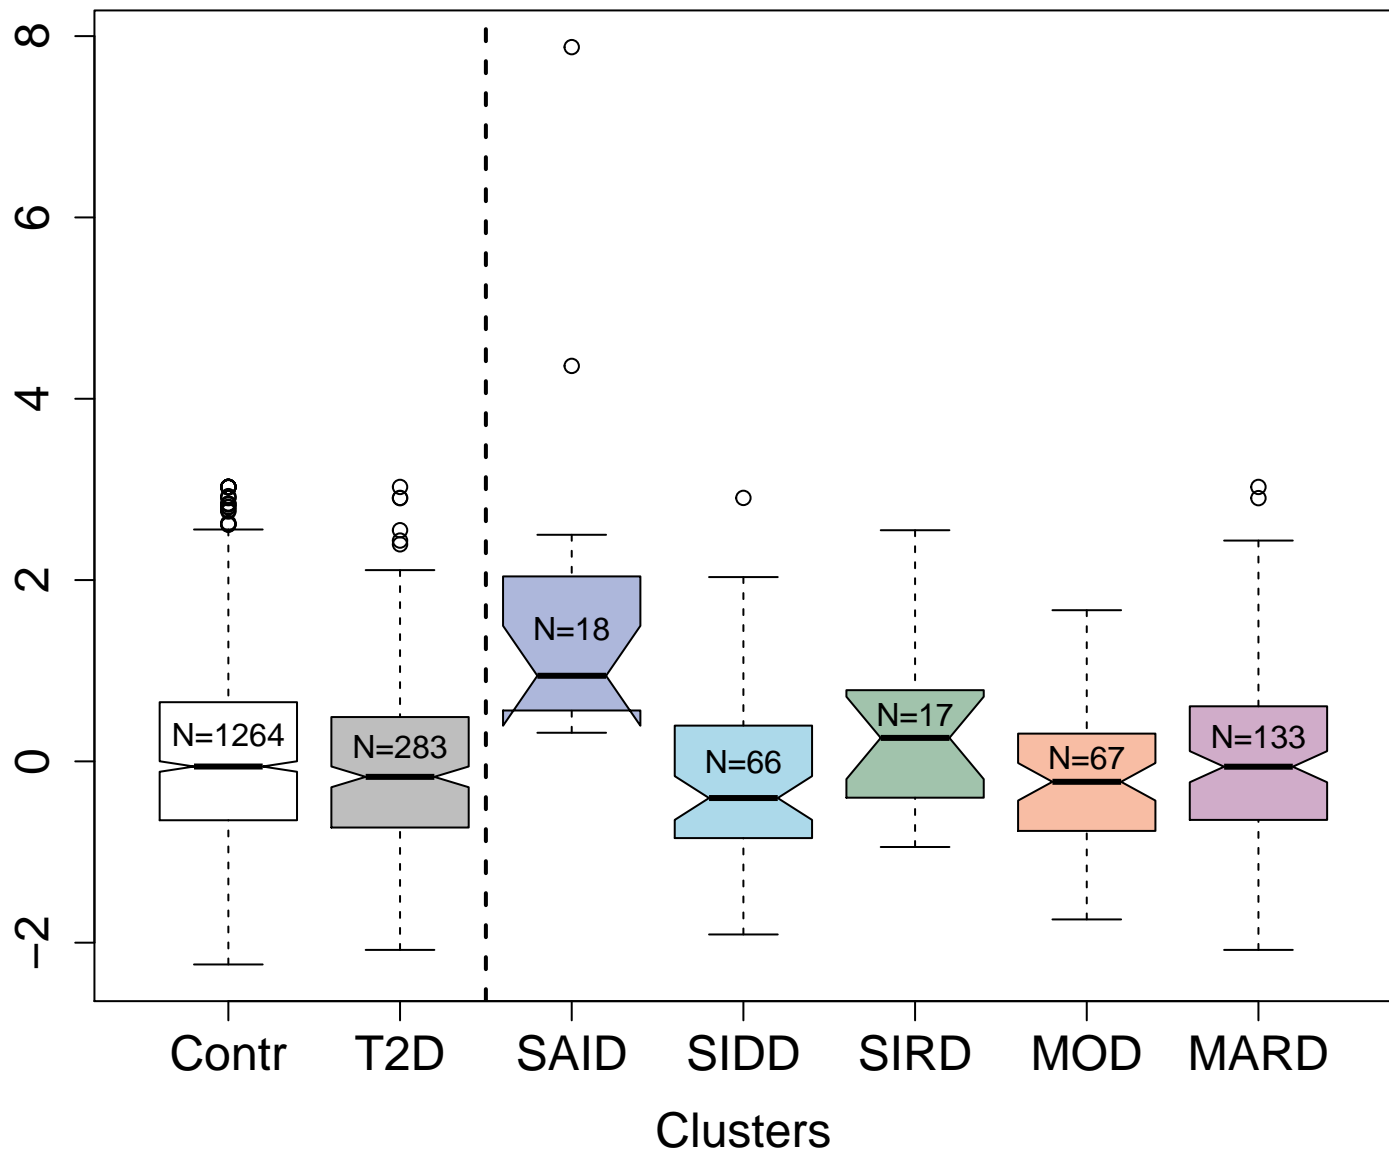

M57554 : 2'-O-methylcytidine

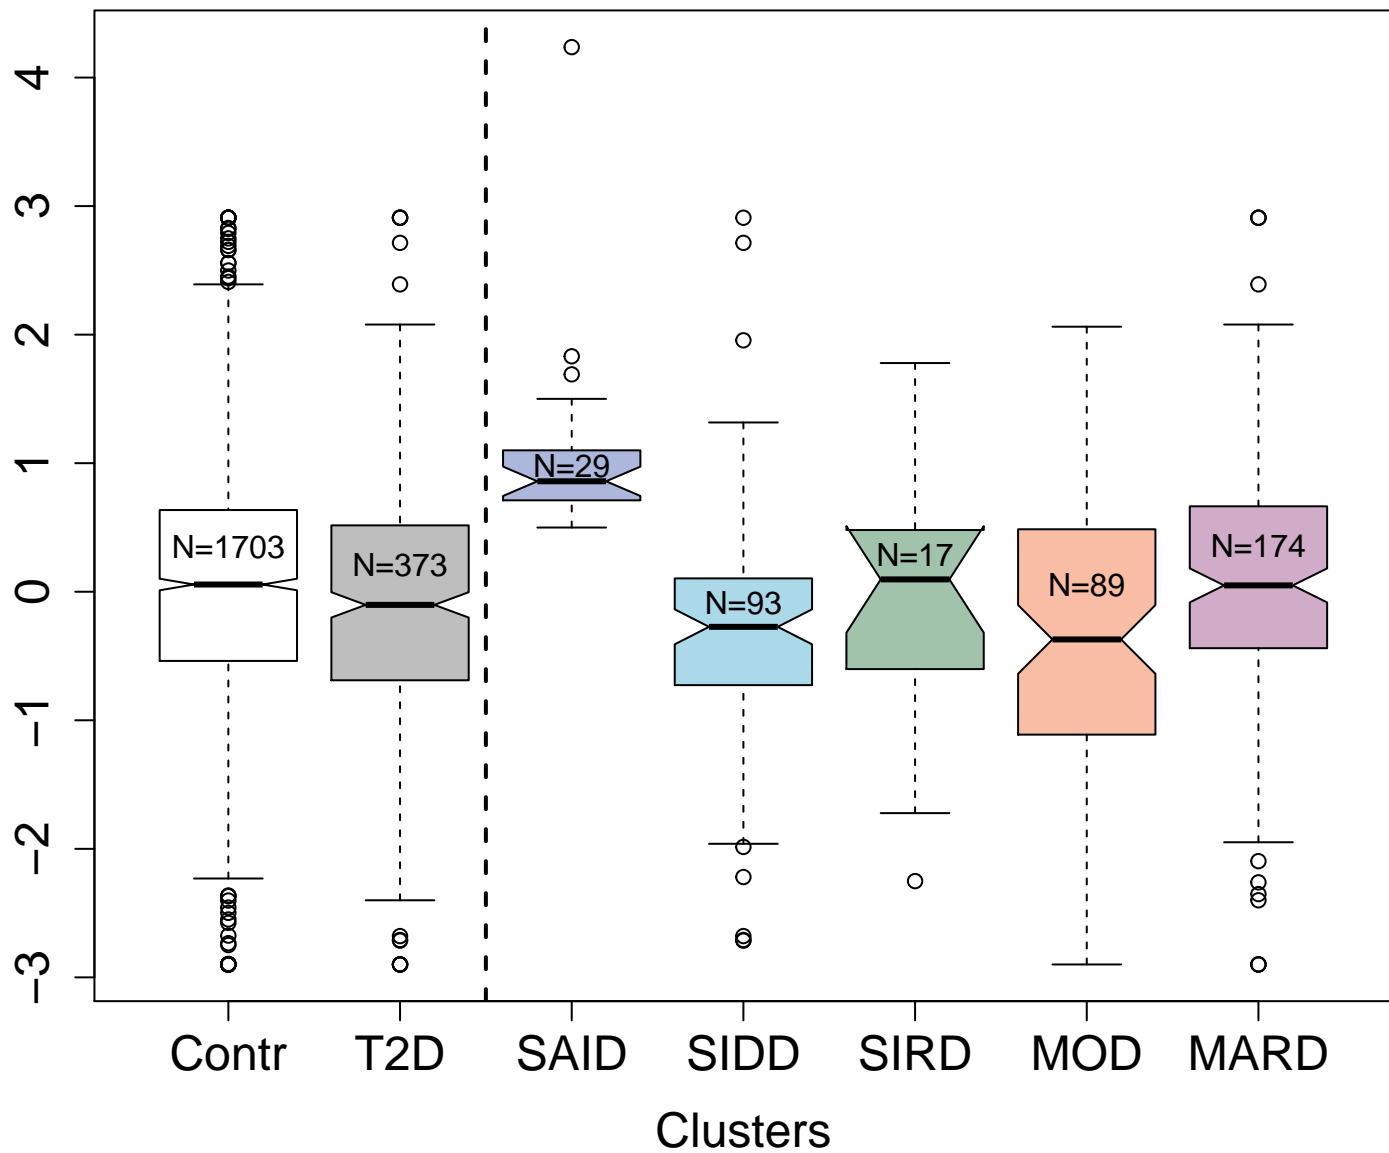

M43802 : guanidinoacetate

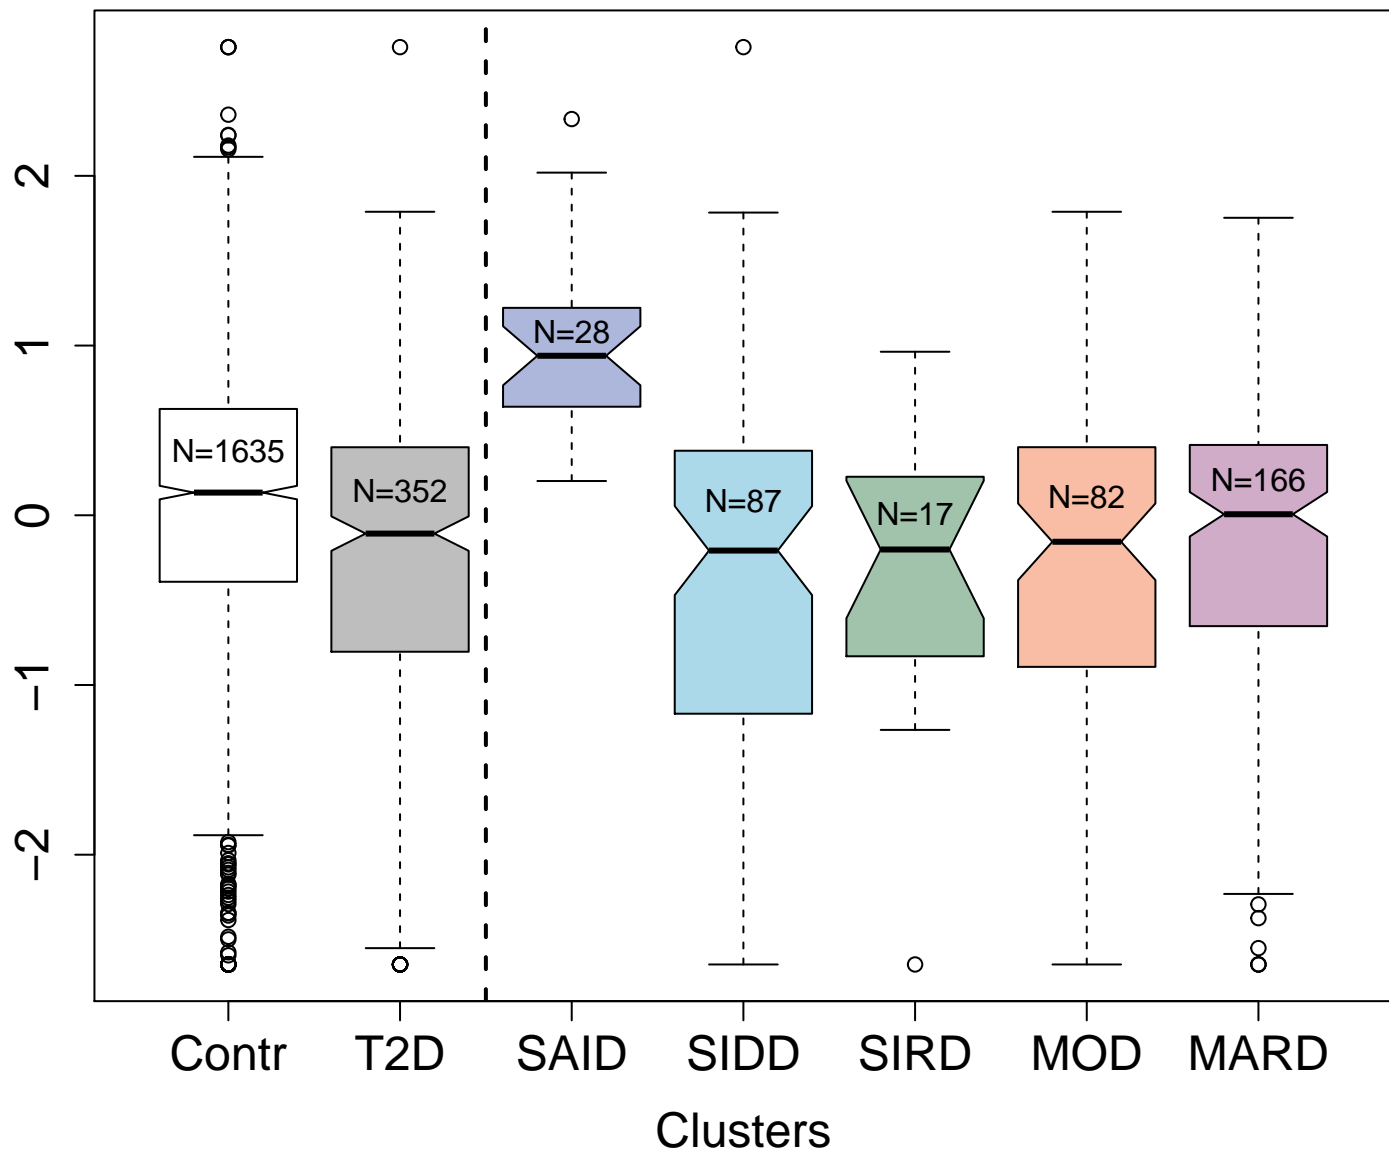

M32328 : hexanoylcarnitine (C6)

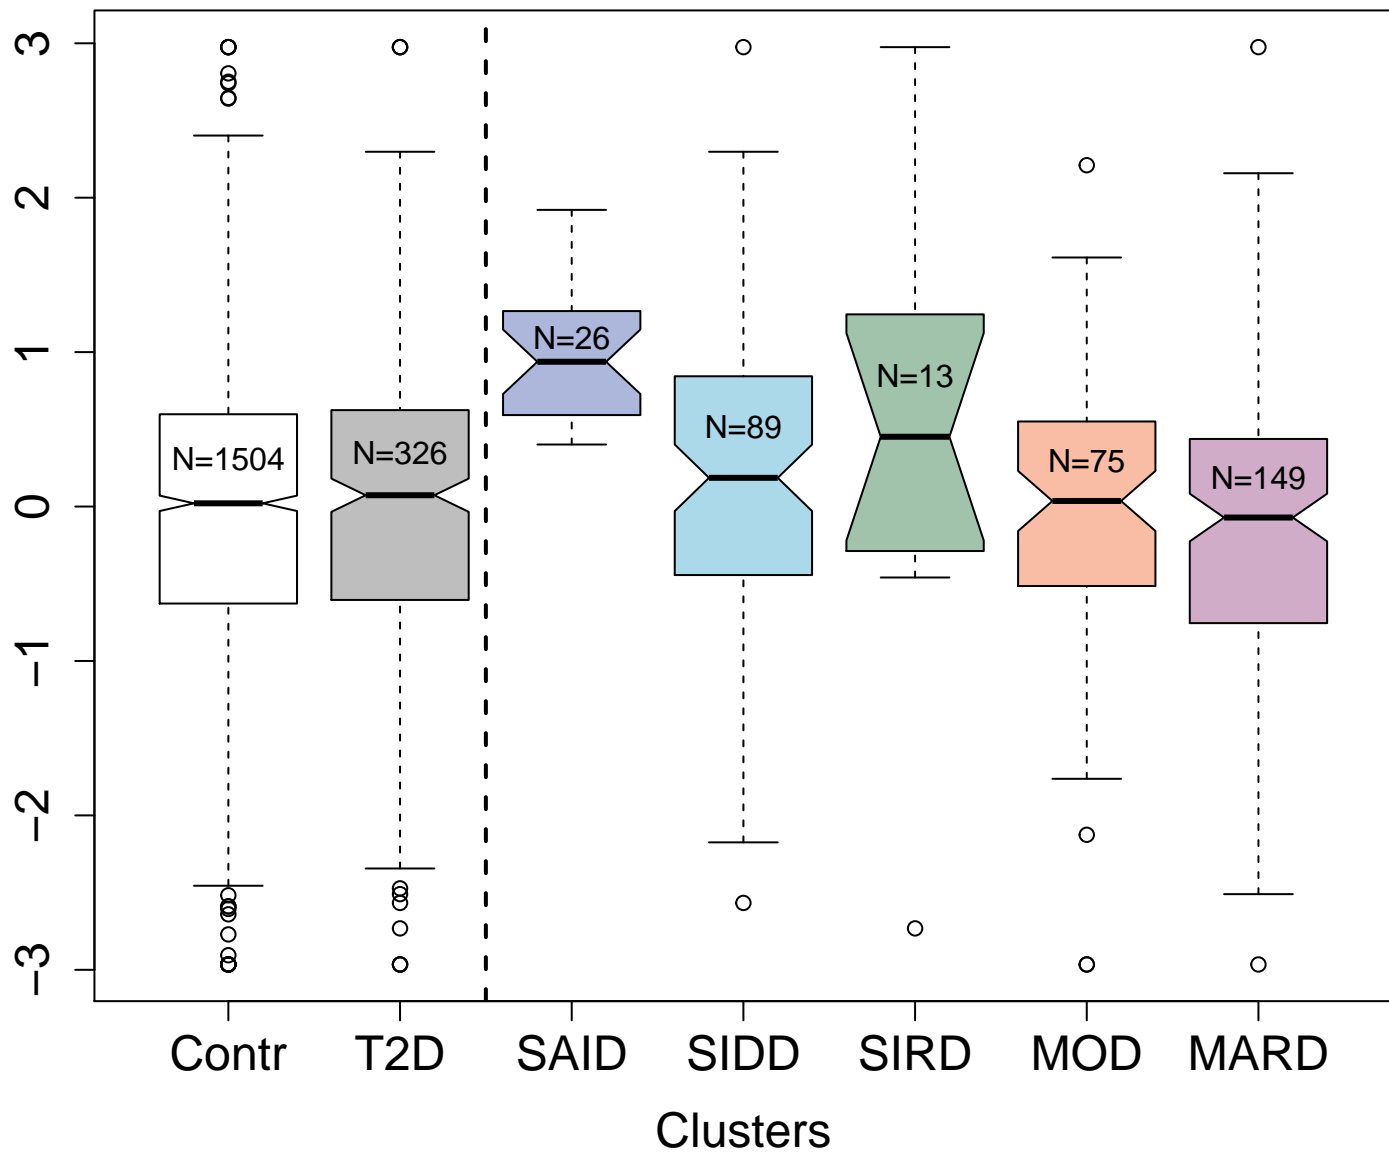

M41888 : succinimide

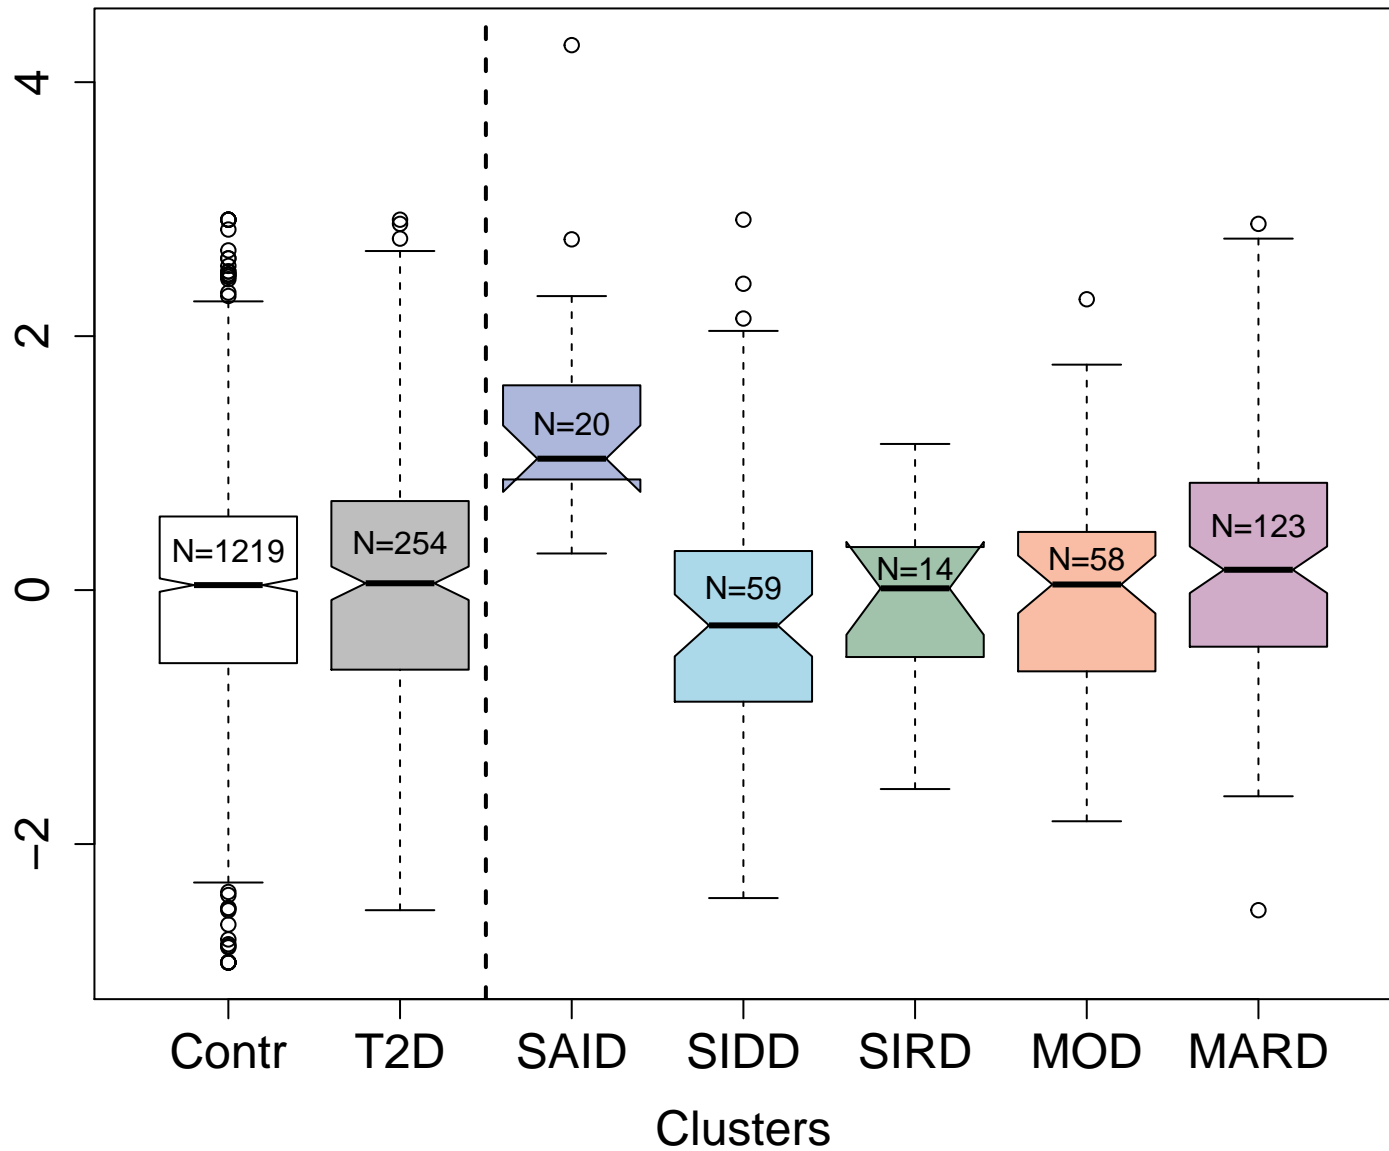

M27672 : 3-indoxyl sulfate

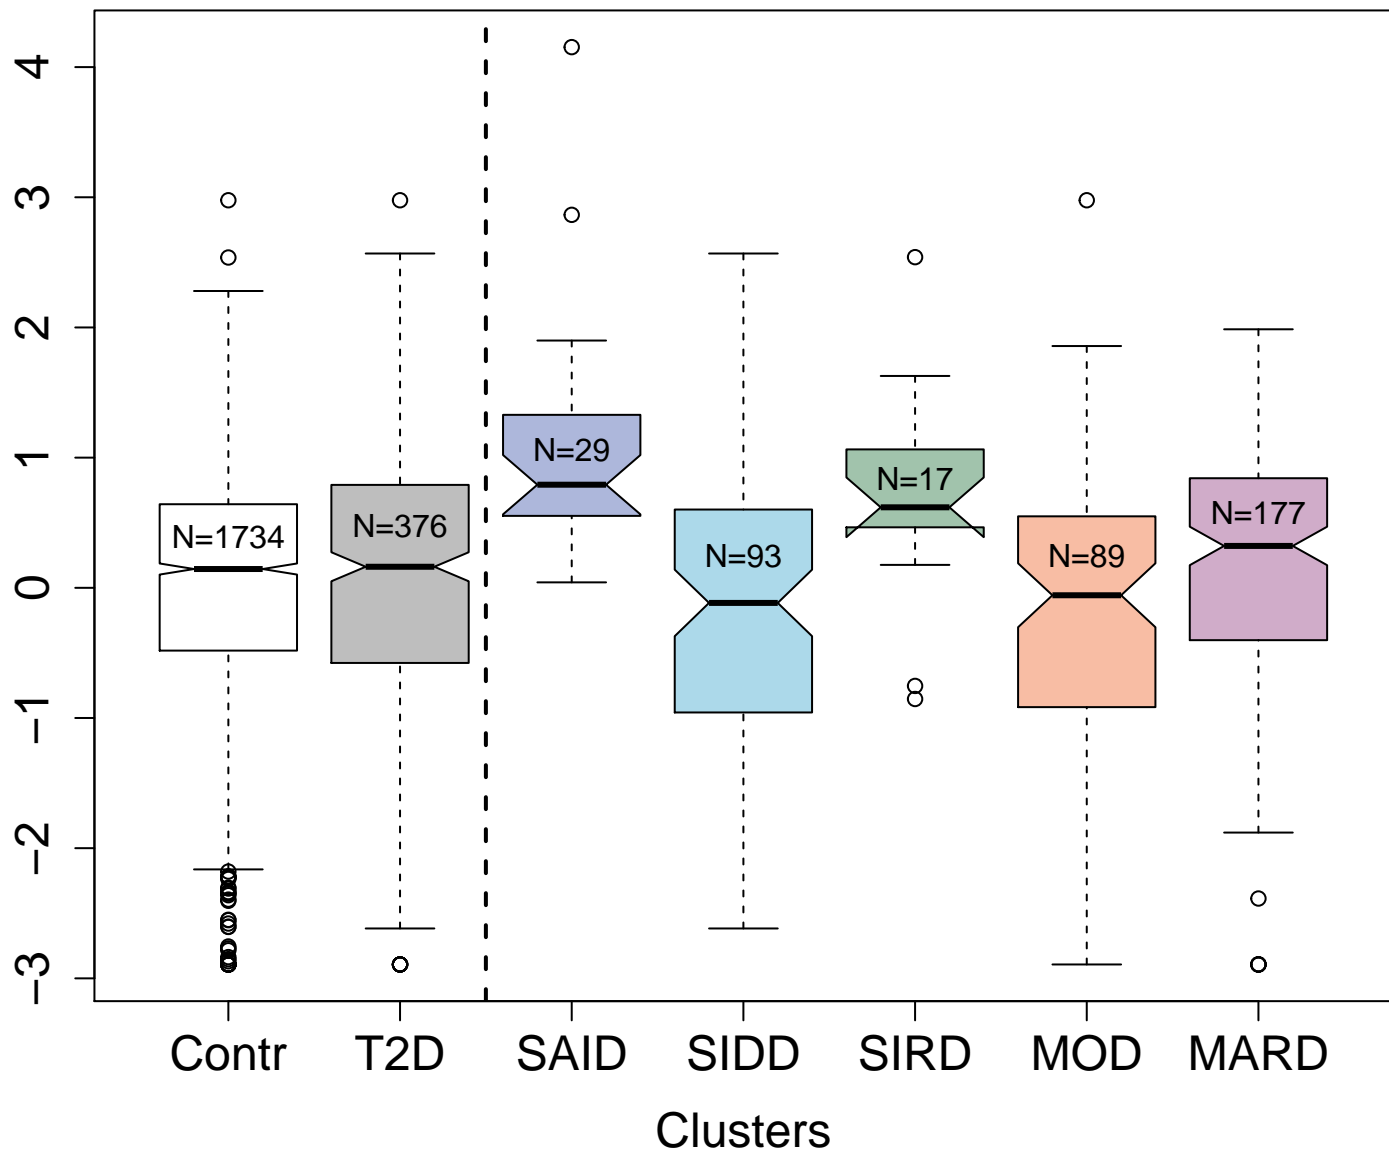

M1564 : citrate

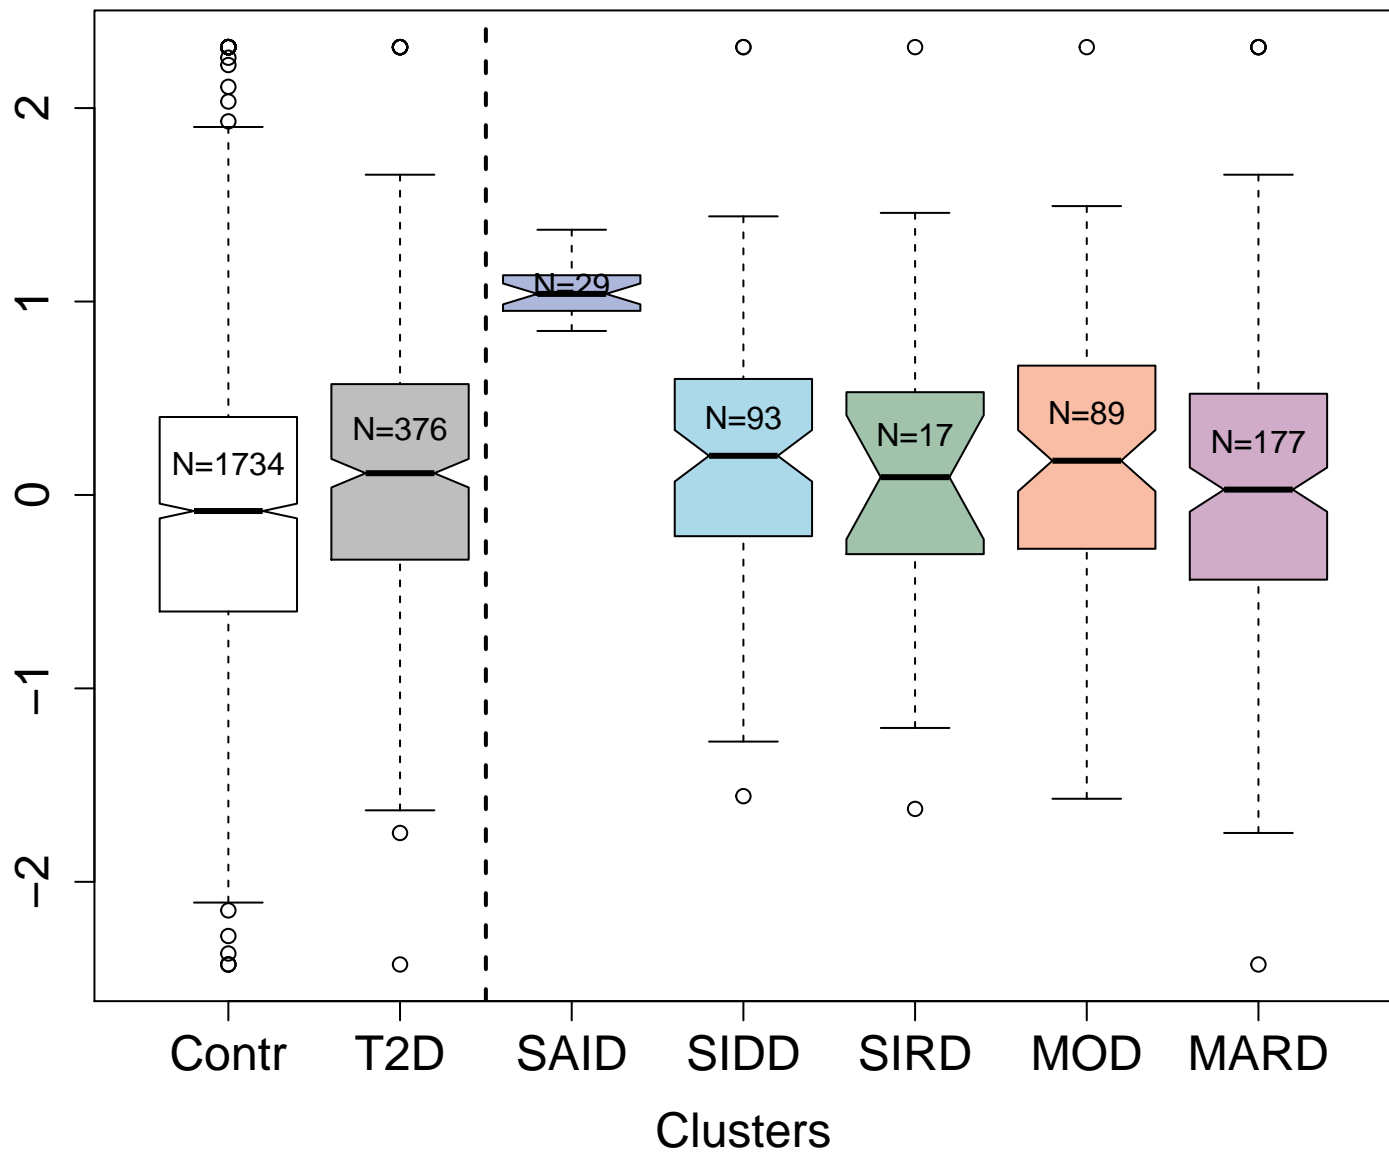



M47929 : X - 12707

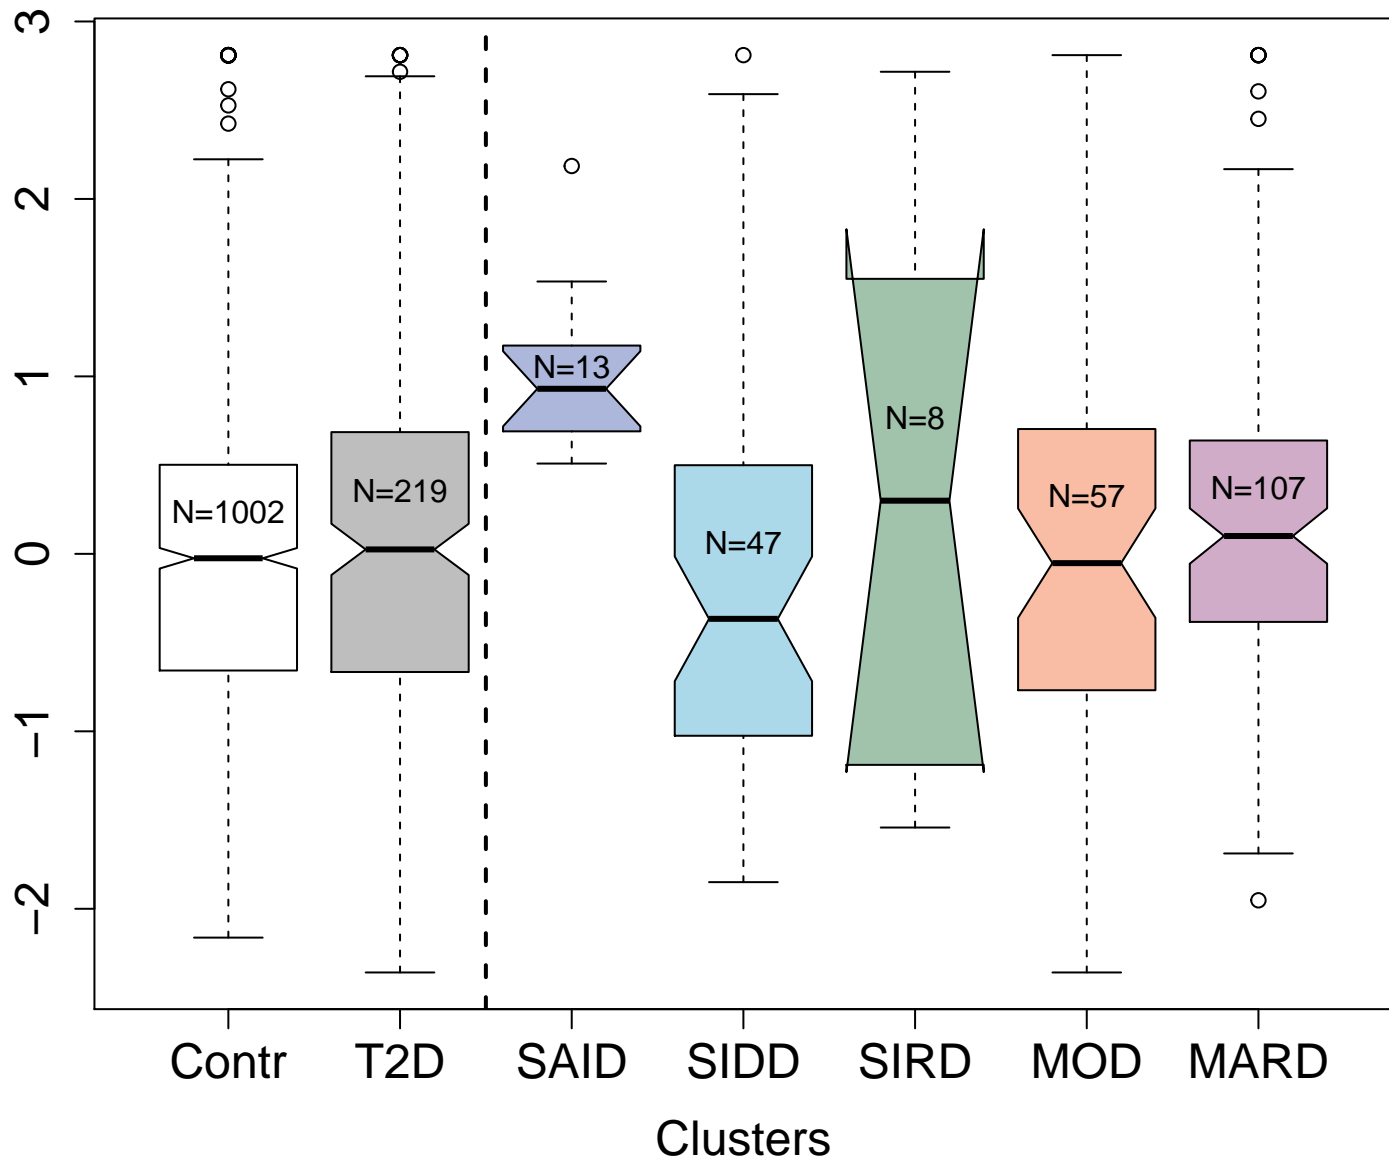

M64177 : S-carboxymethylcysteine

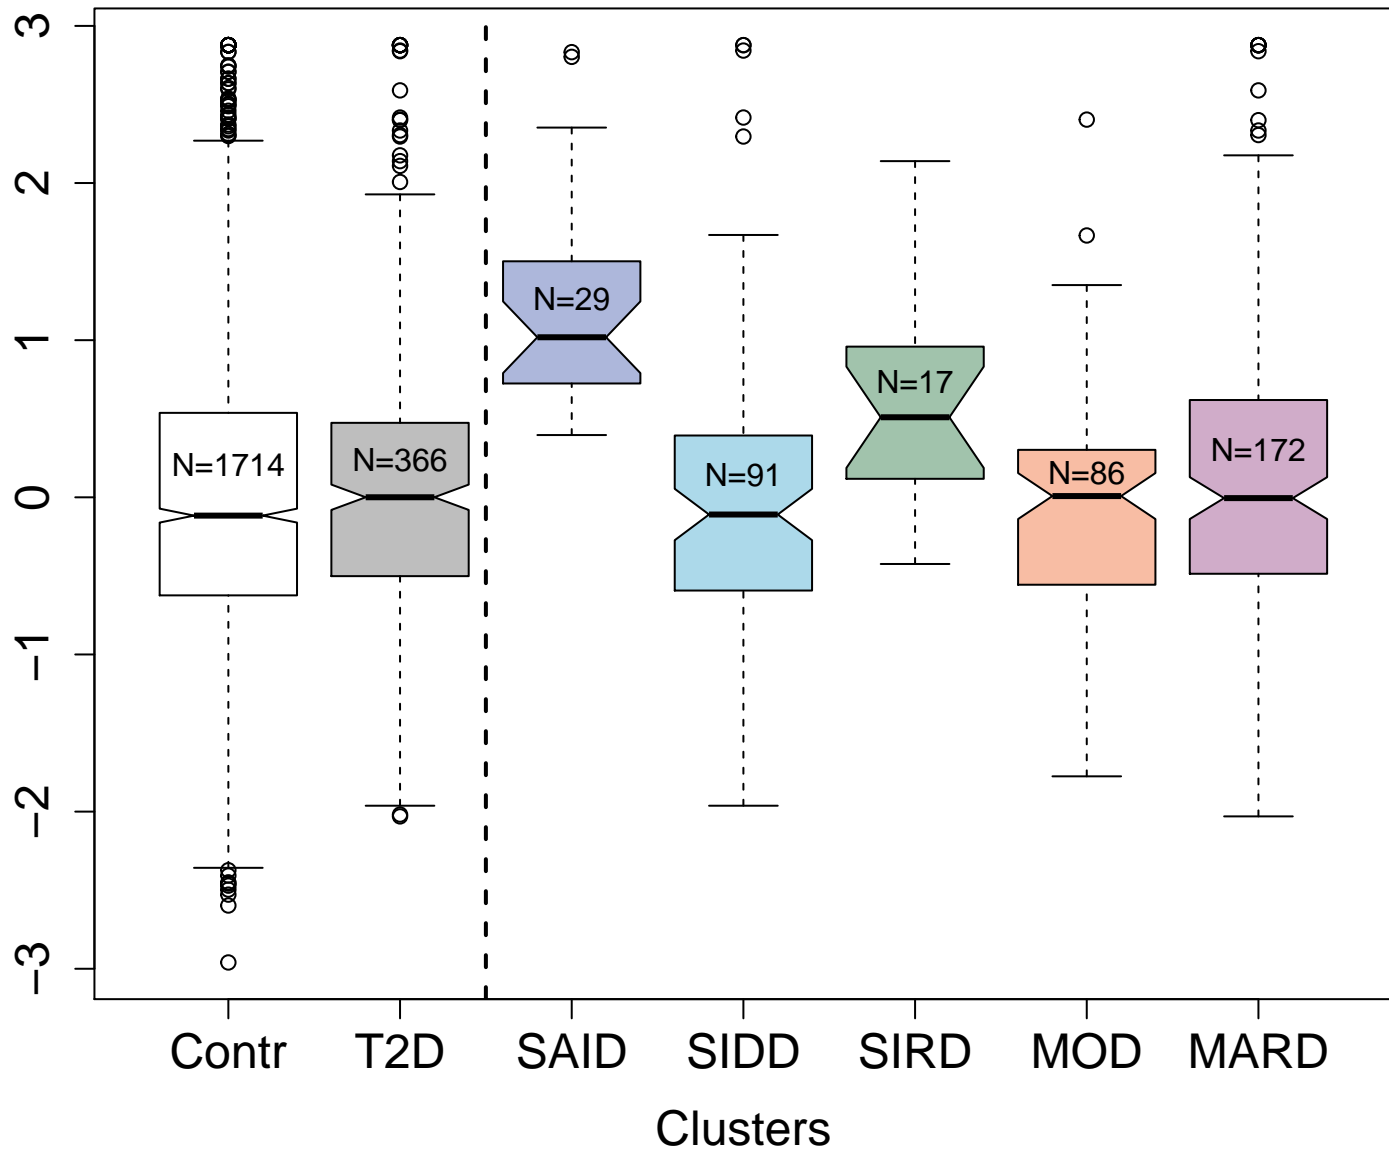

M52773 : X - 24456

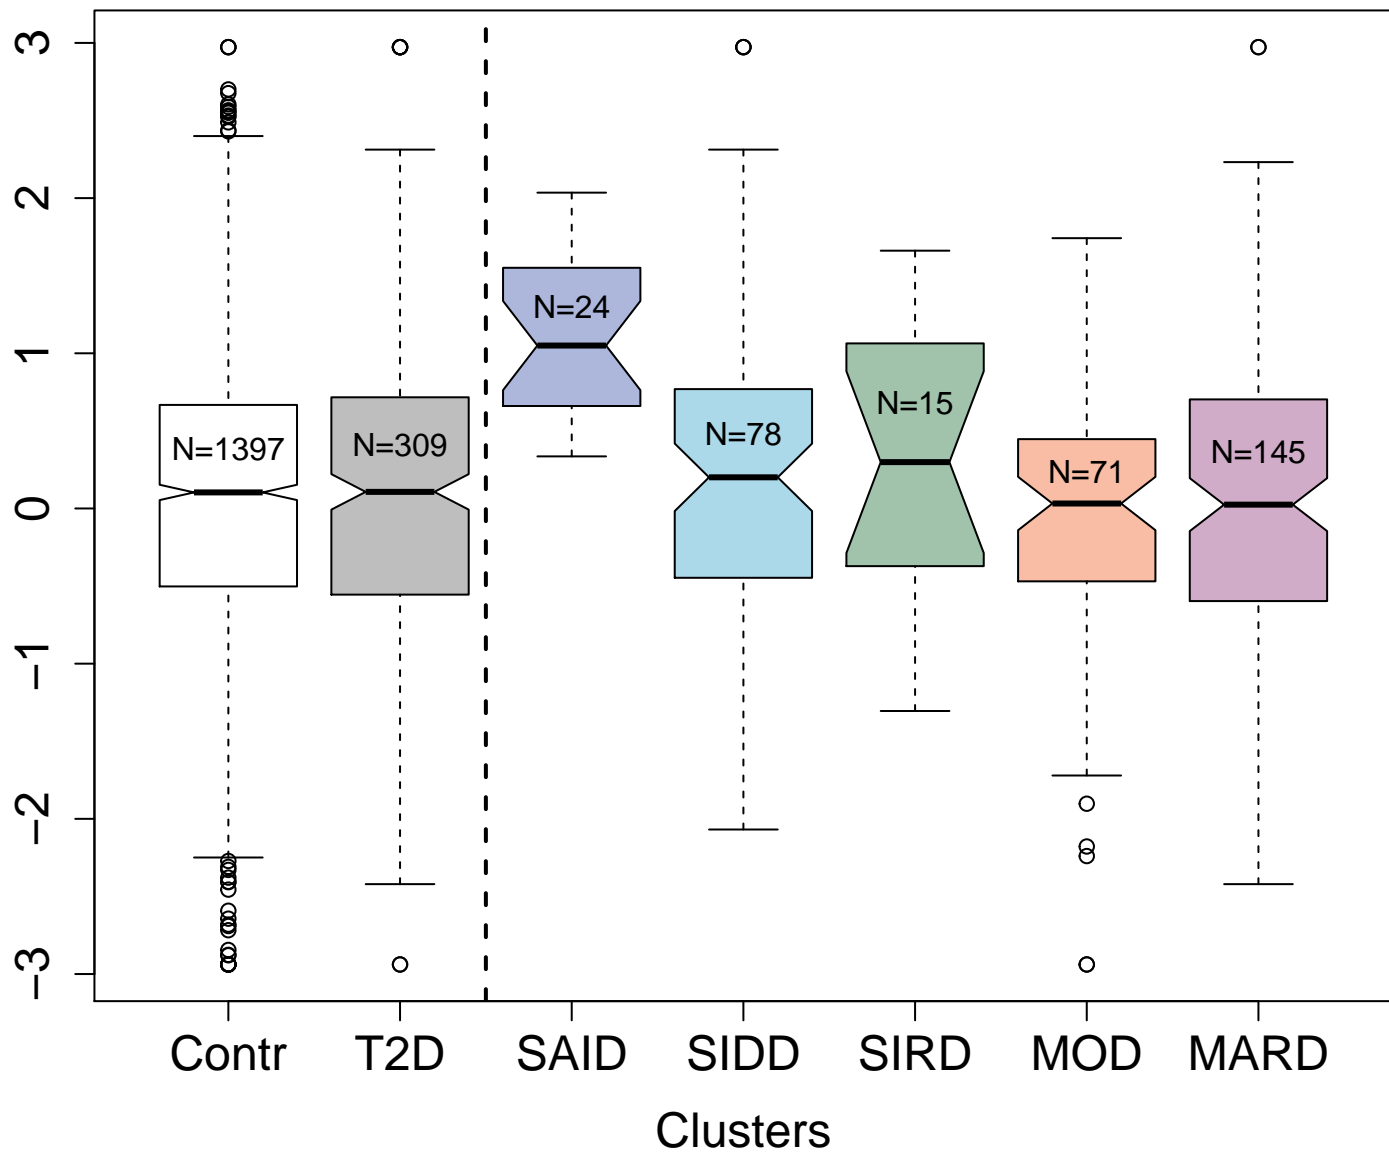

M1589 : N-acetylmethionine

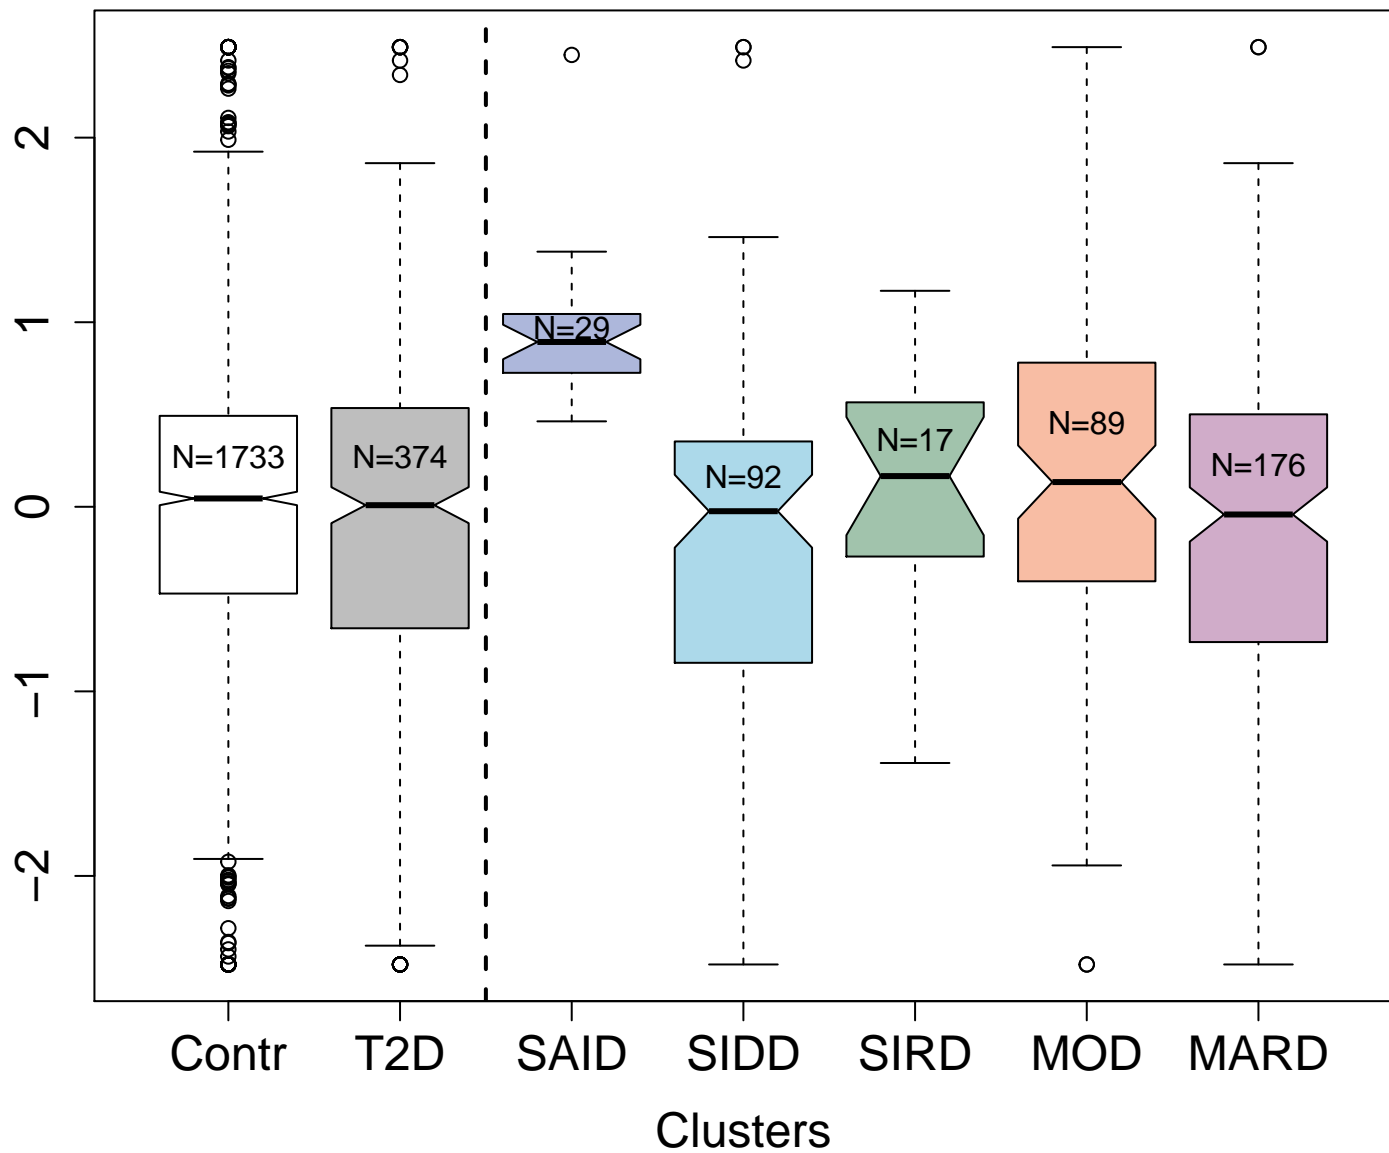

M37114 : N6-methyladenosine

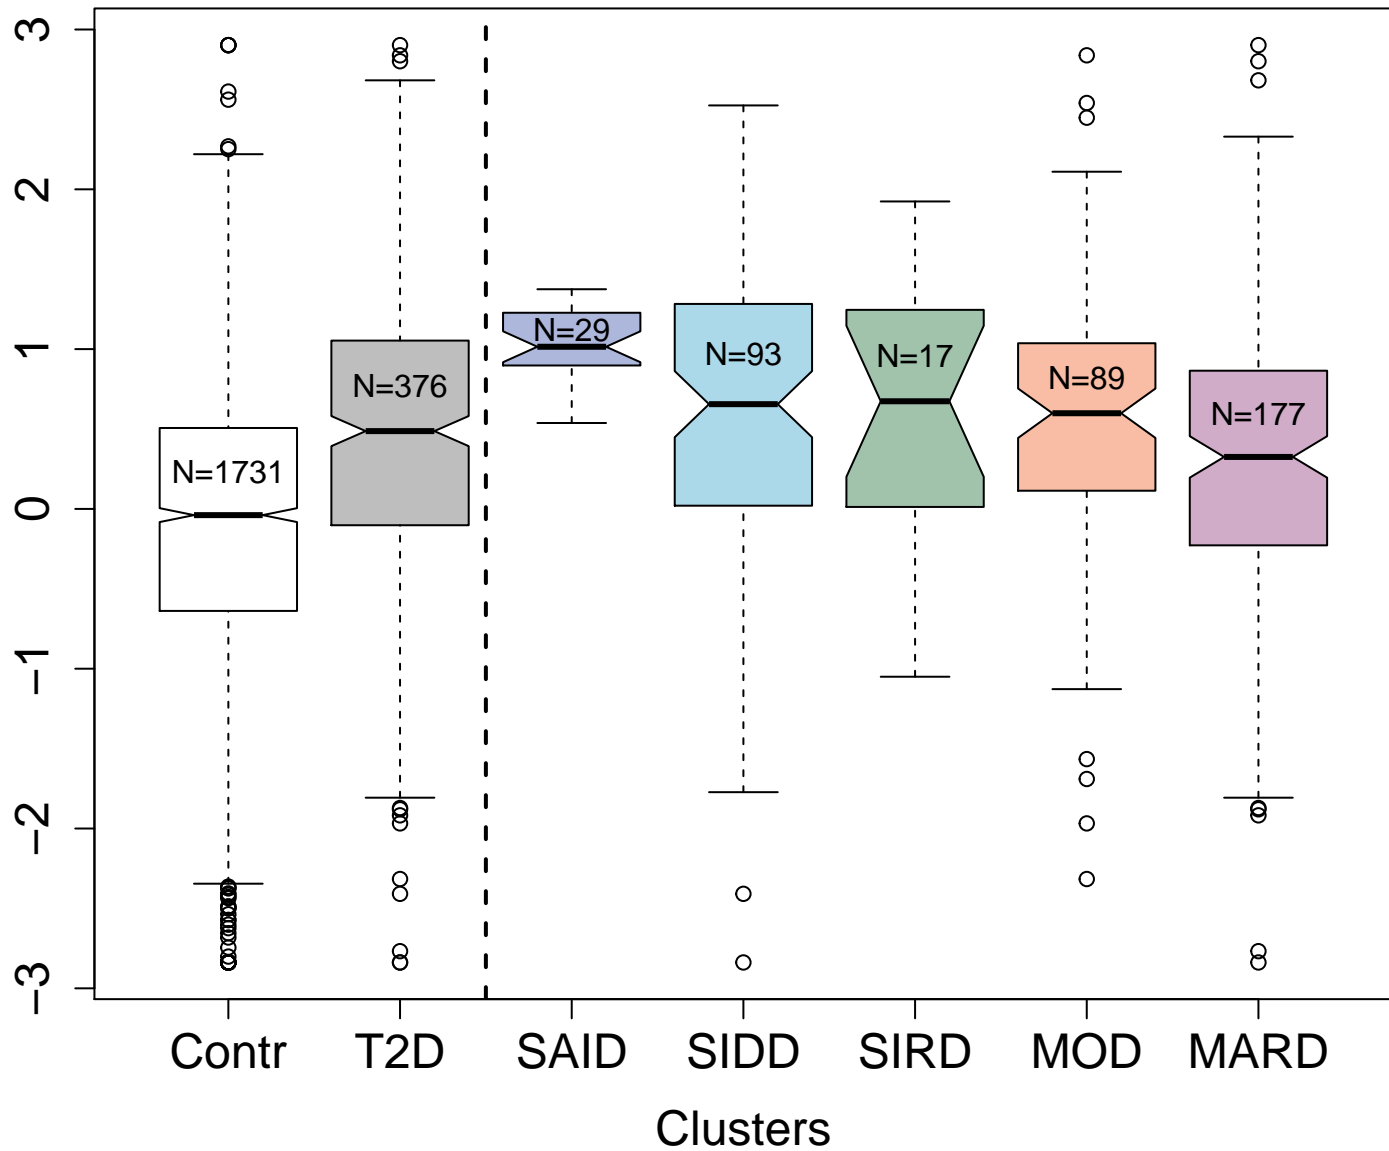

M35136 : 5-methyluridine (ribothymidine)

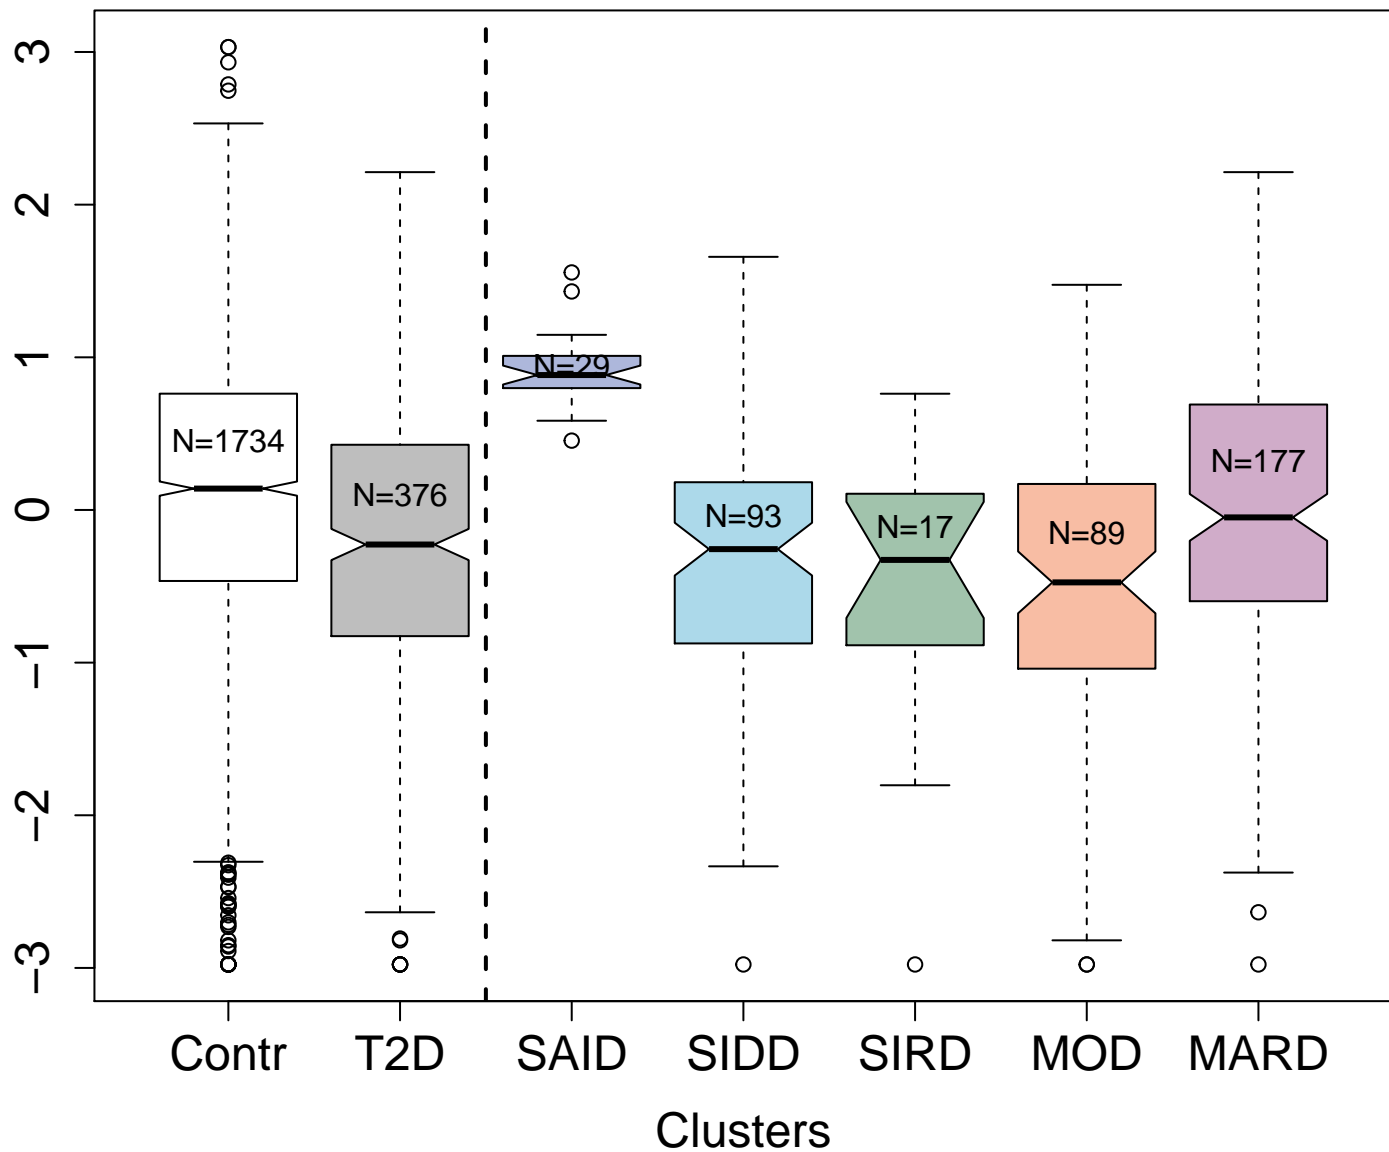

M15730 : suberate (C8-DC)

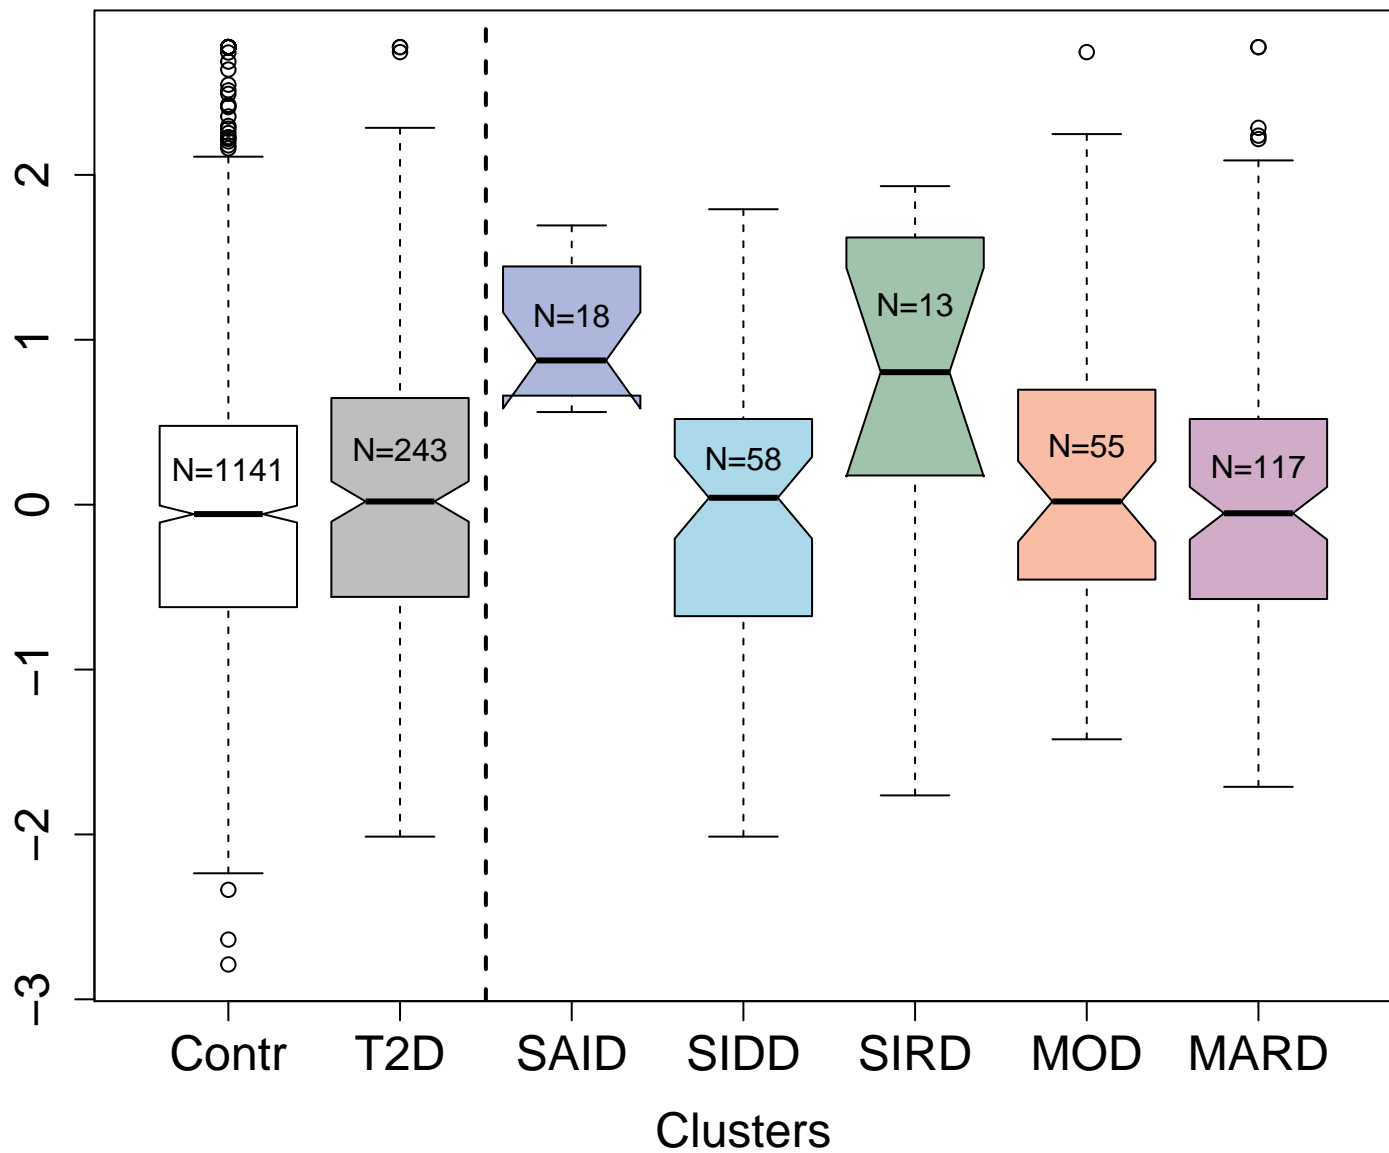

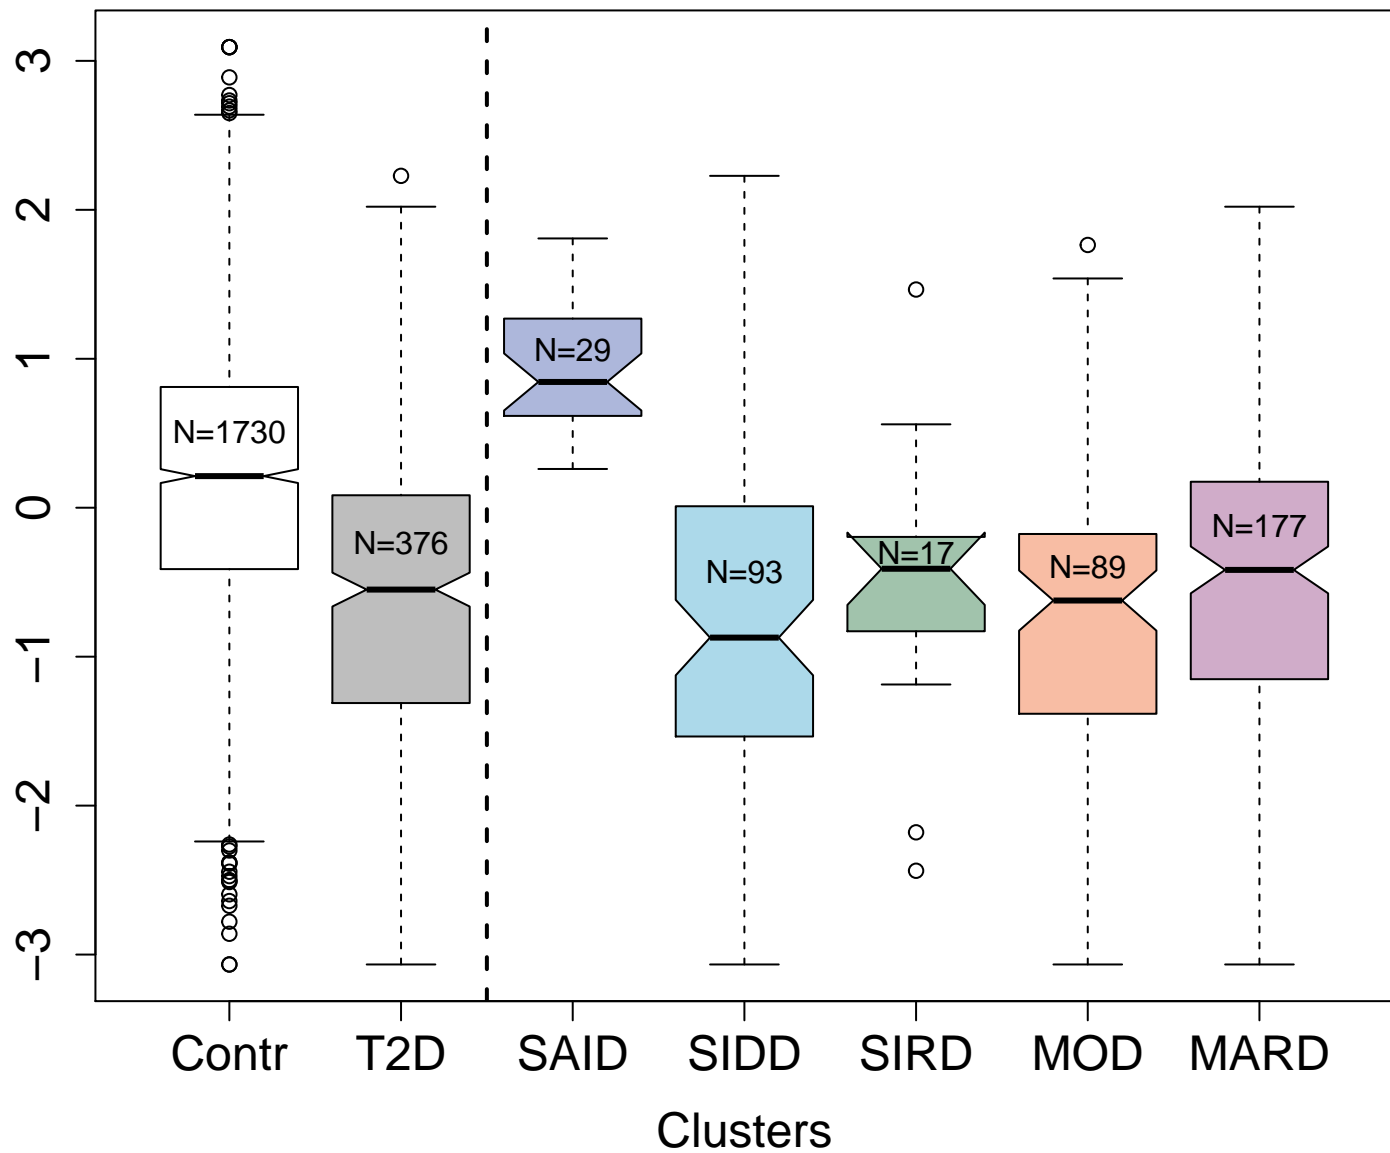



M52286 : X - 24243

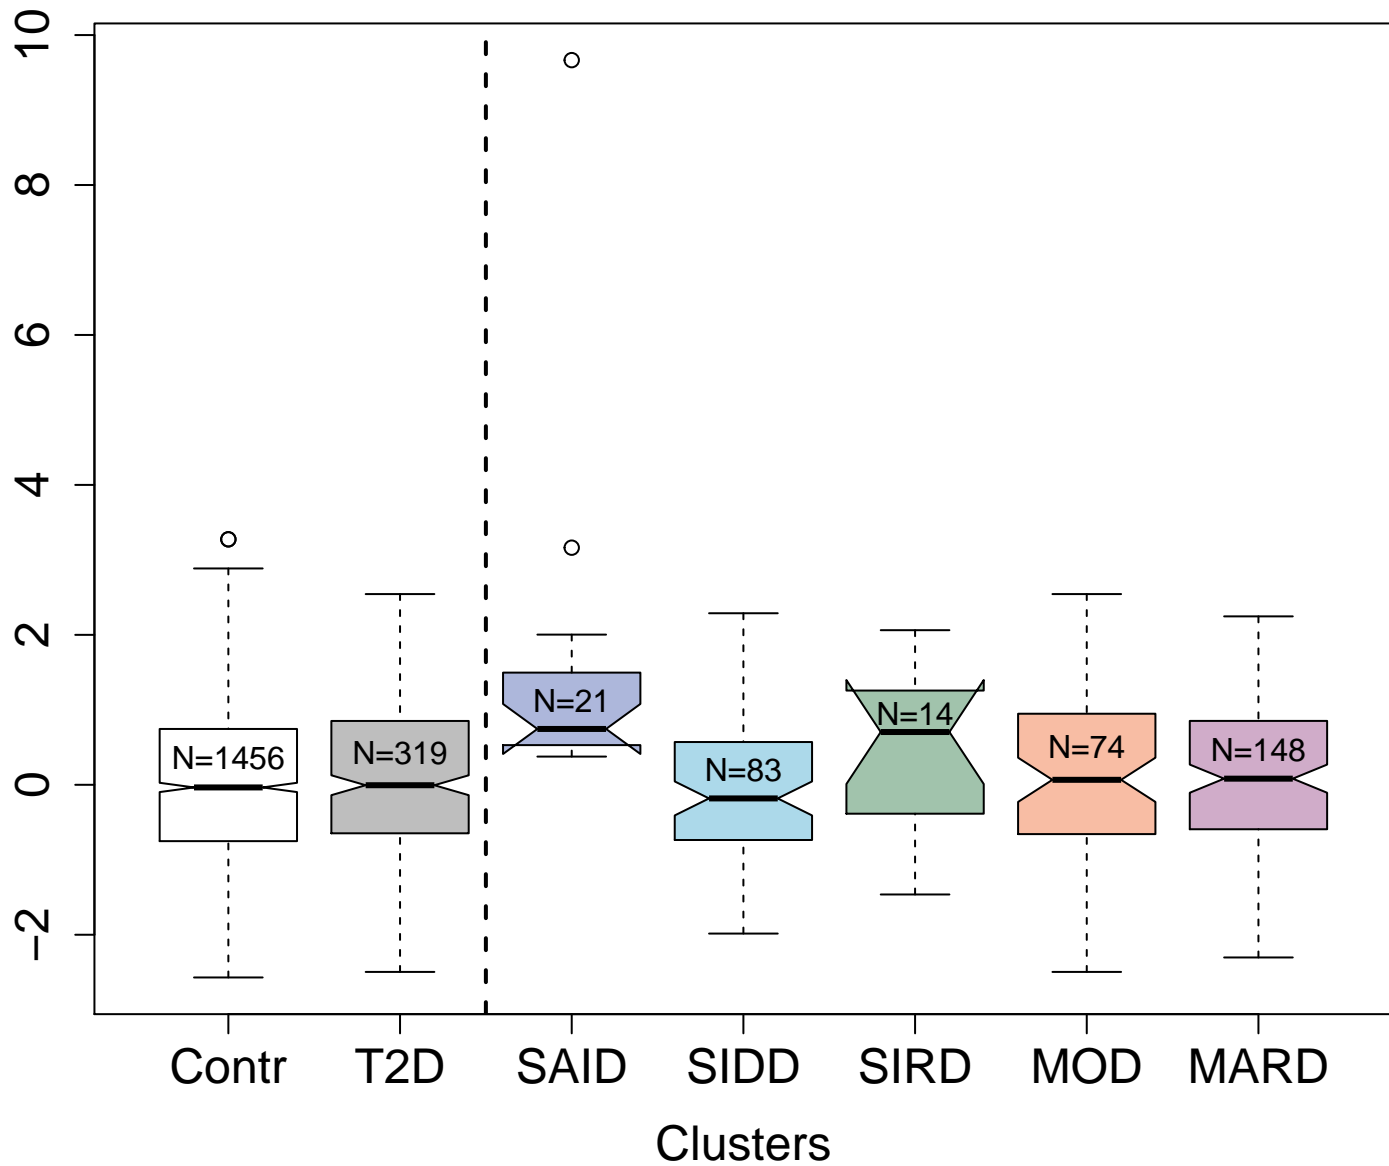

M49469 : X - 23593

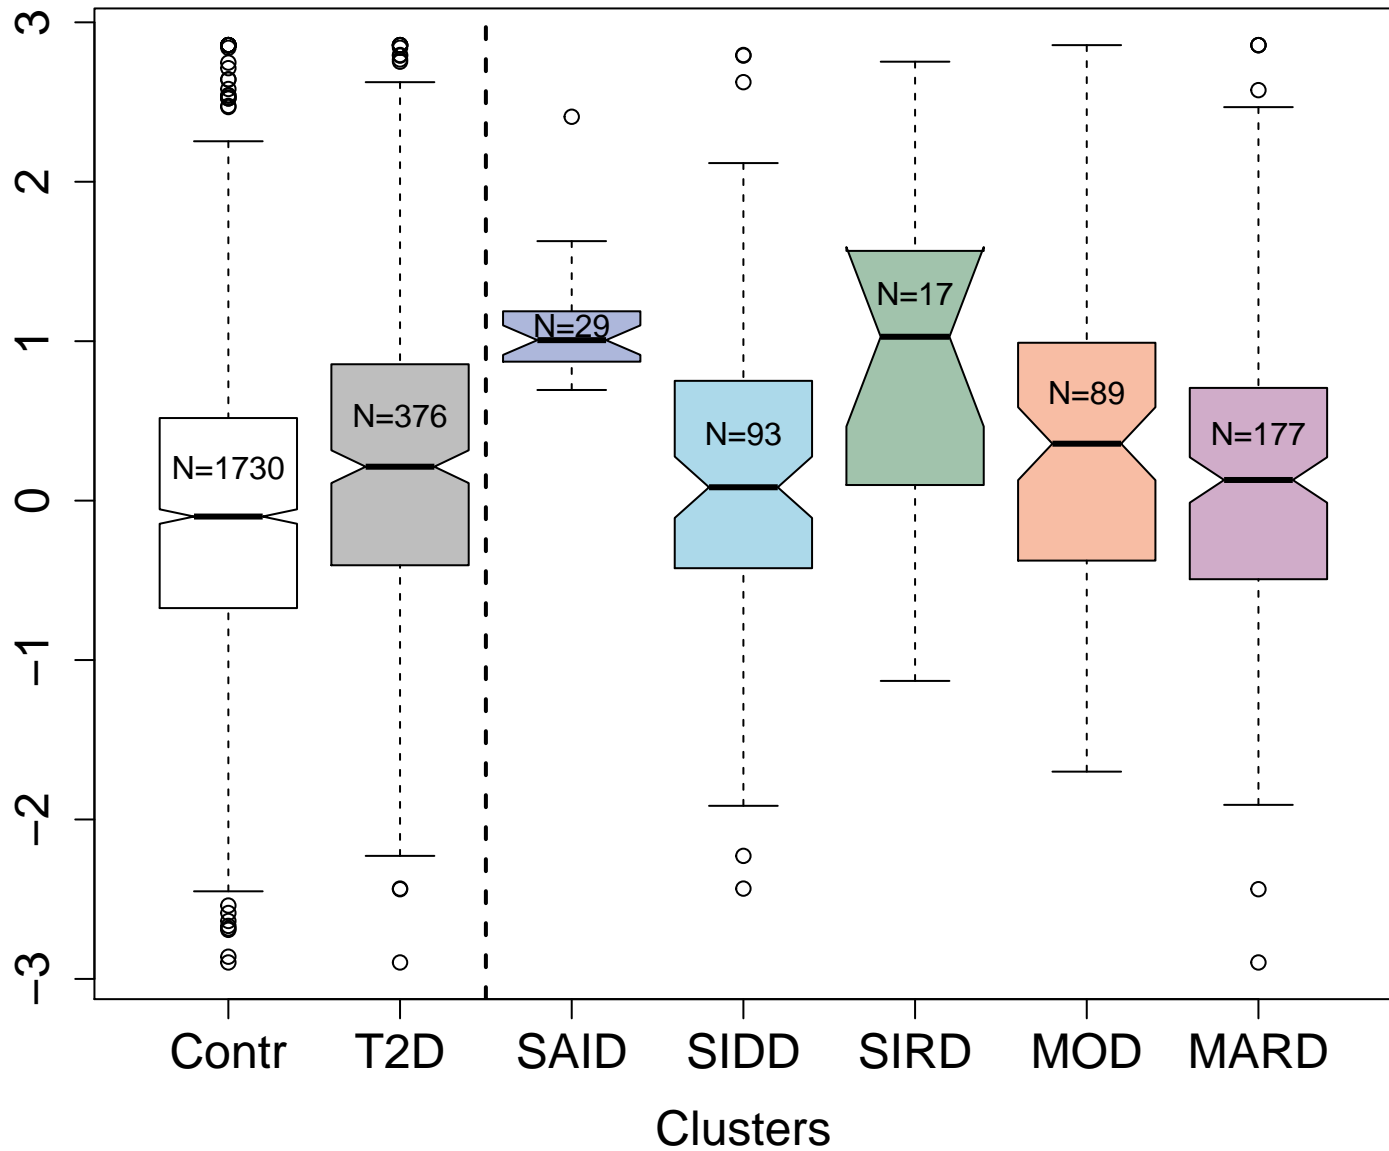

M32489 : caproate (6:0)

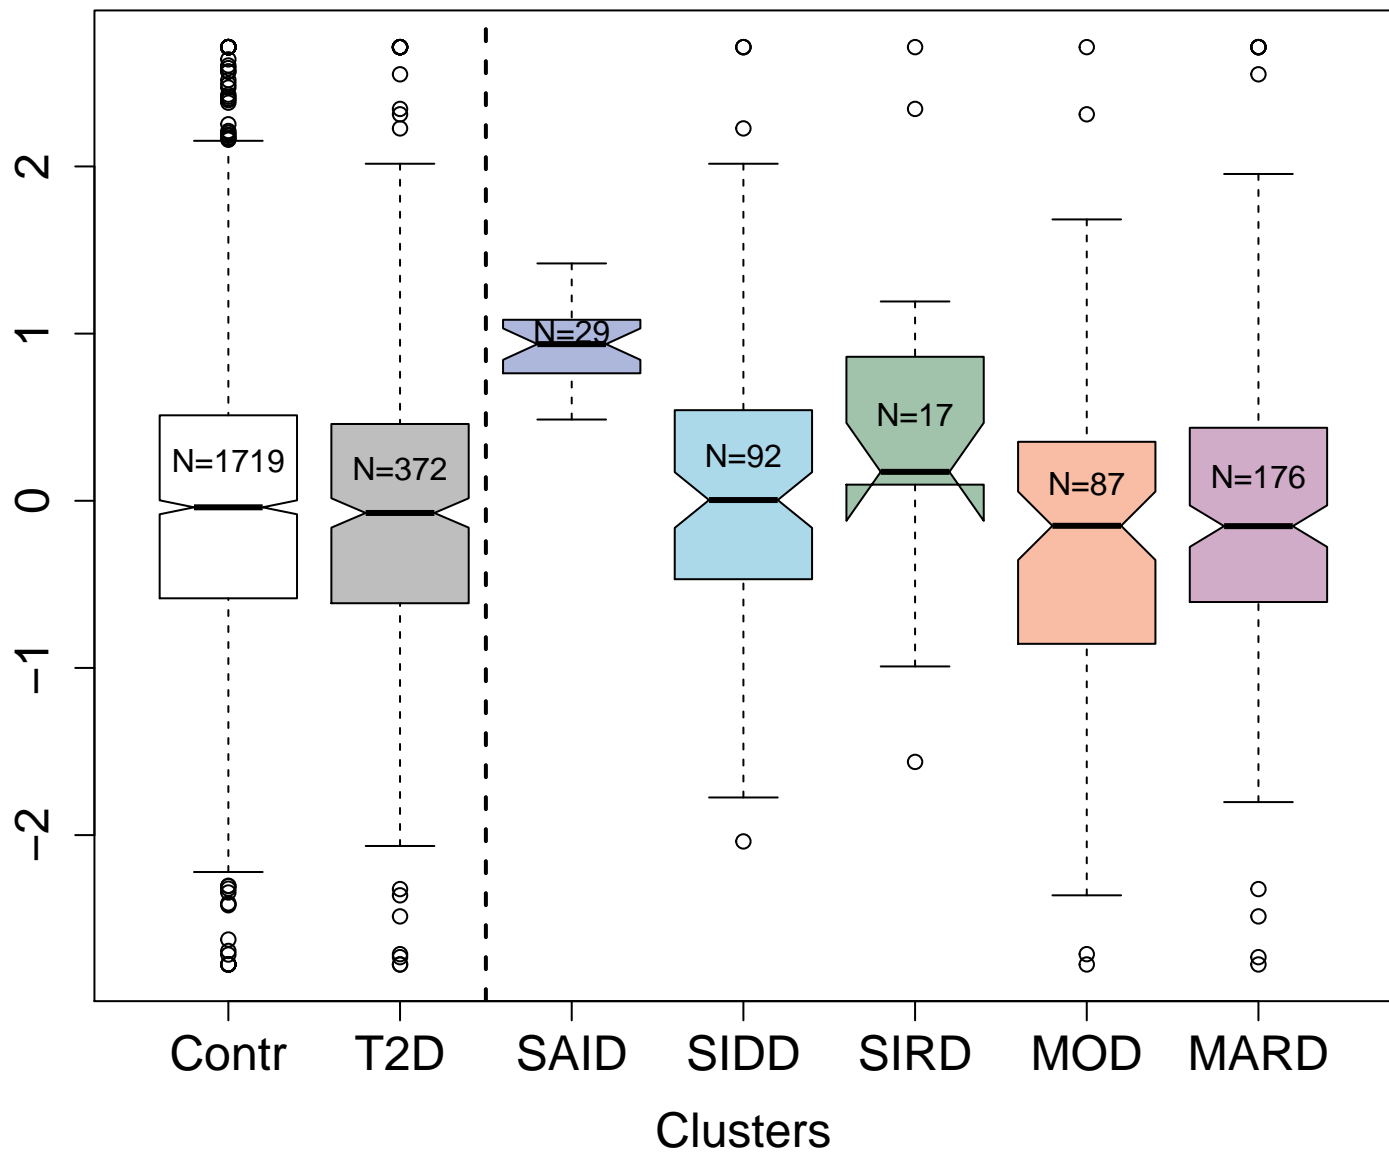

M52877 : X - 24556

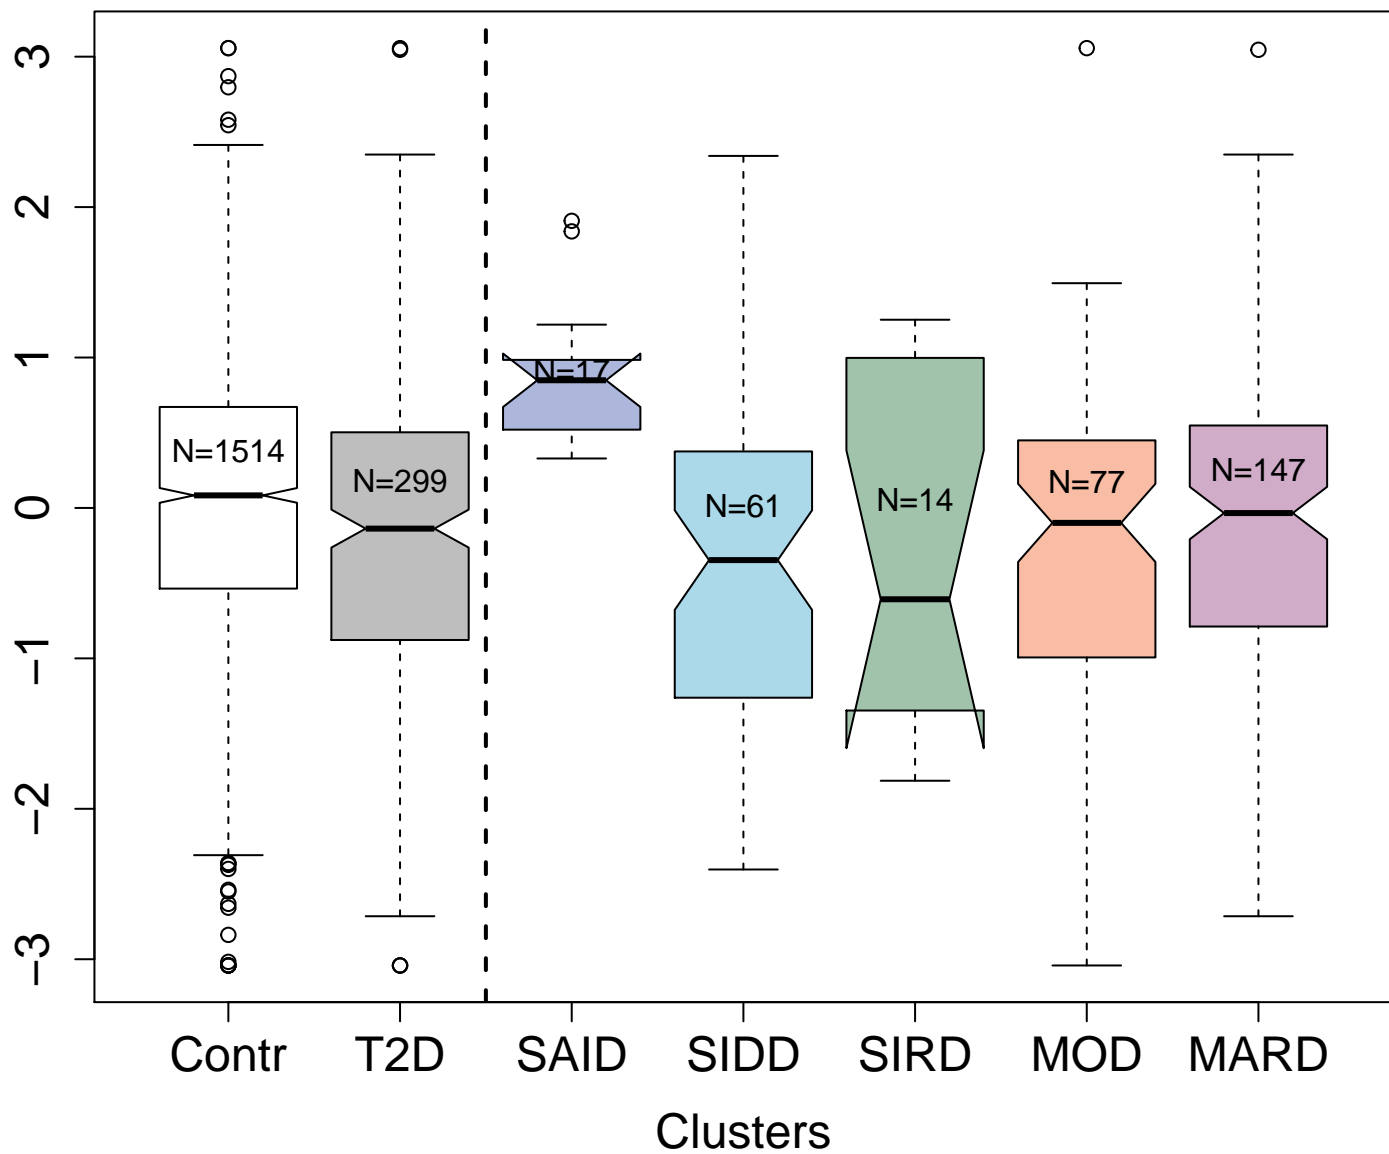

M52340 : N-carbamoylalanine

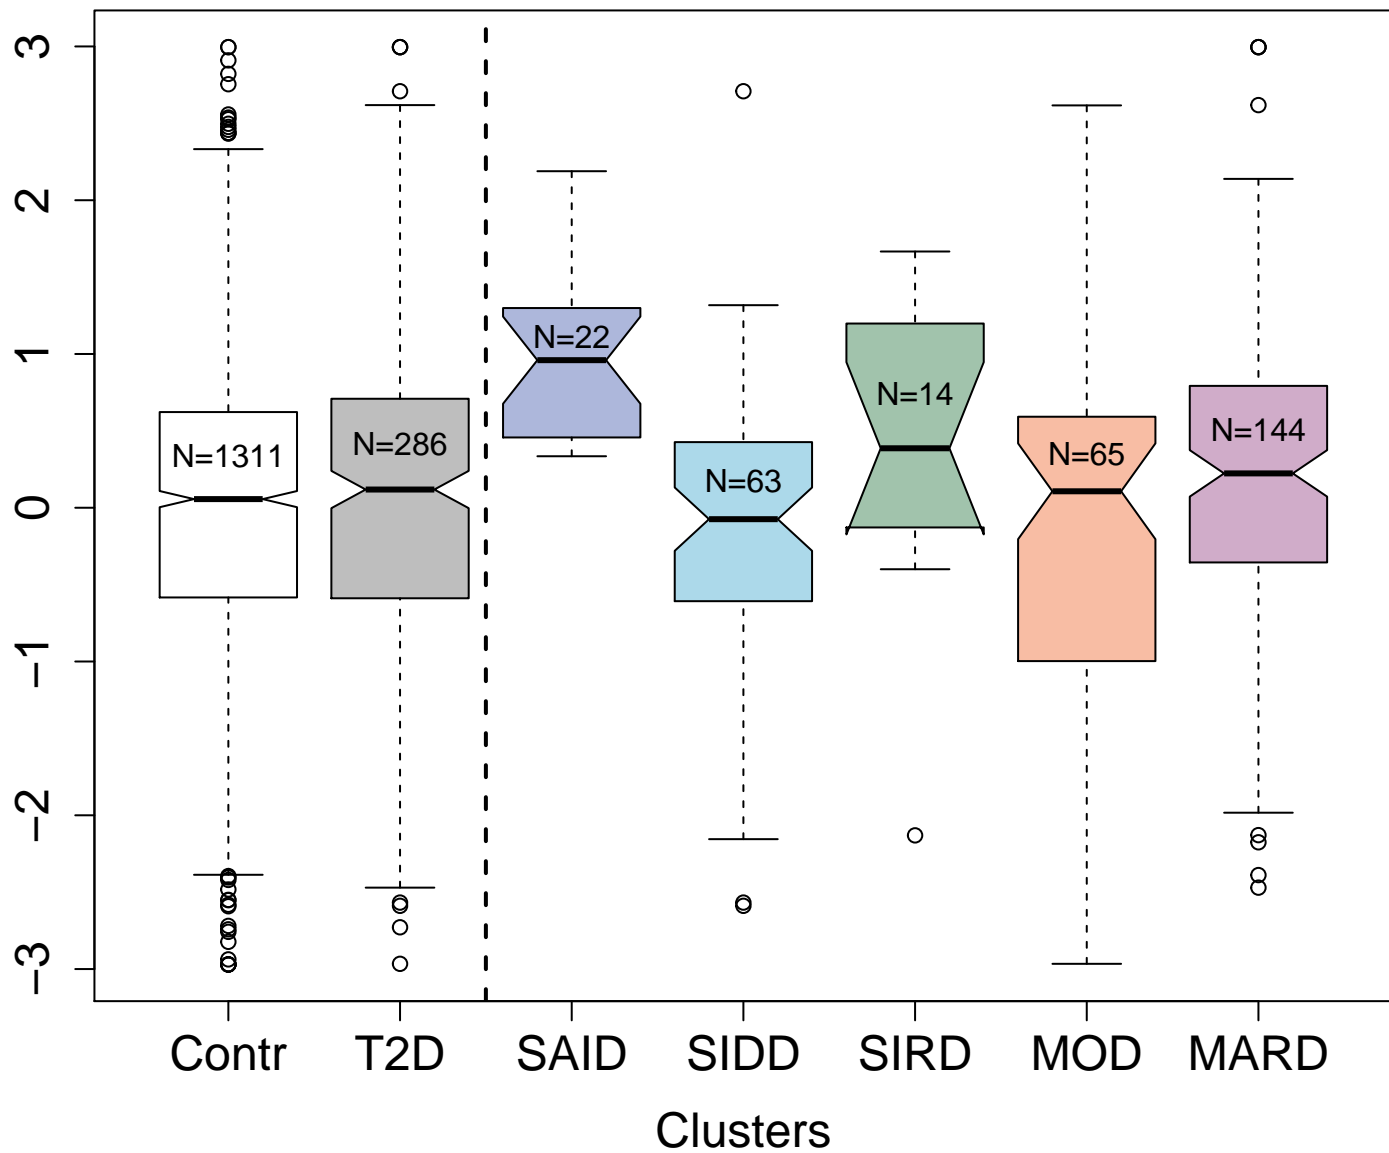

M396 : glutarate (C5-DC)

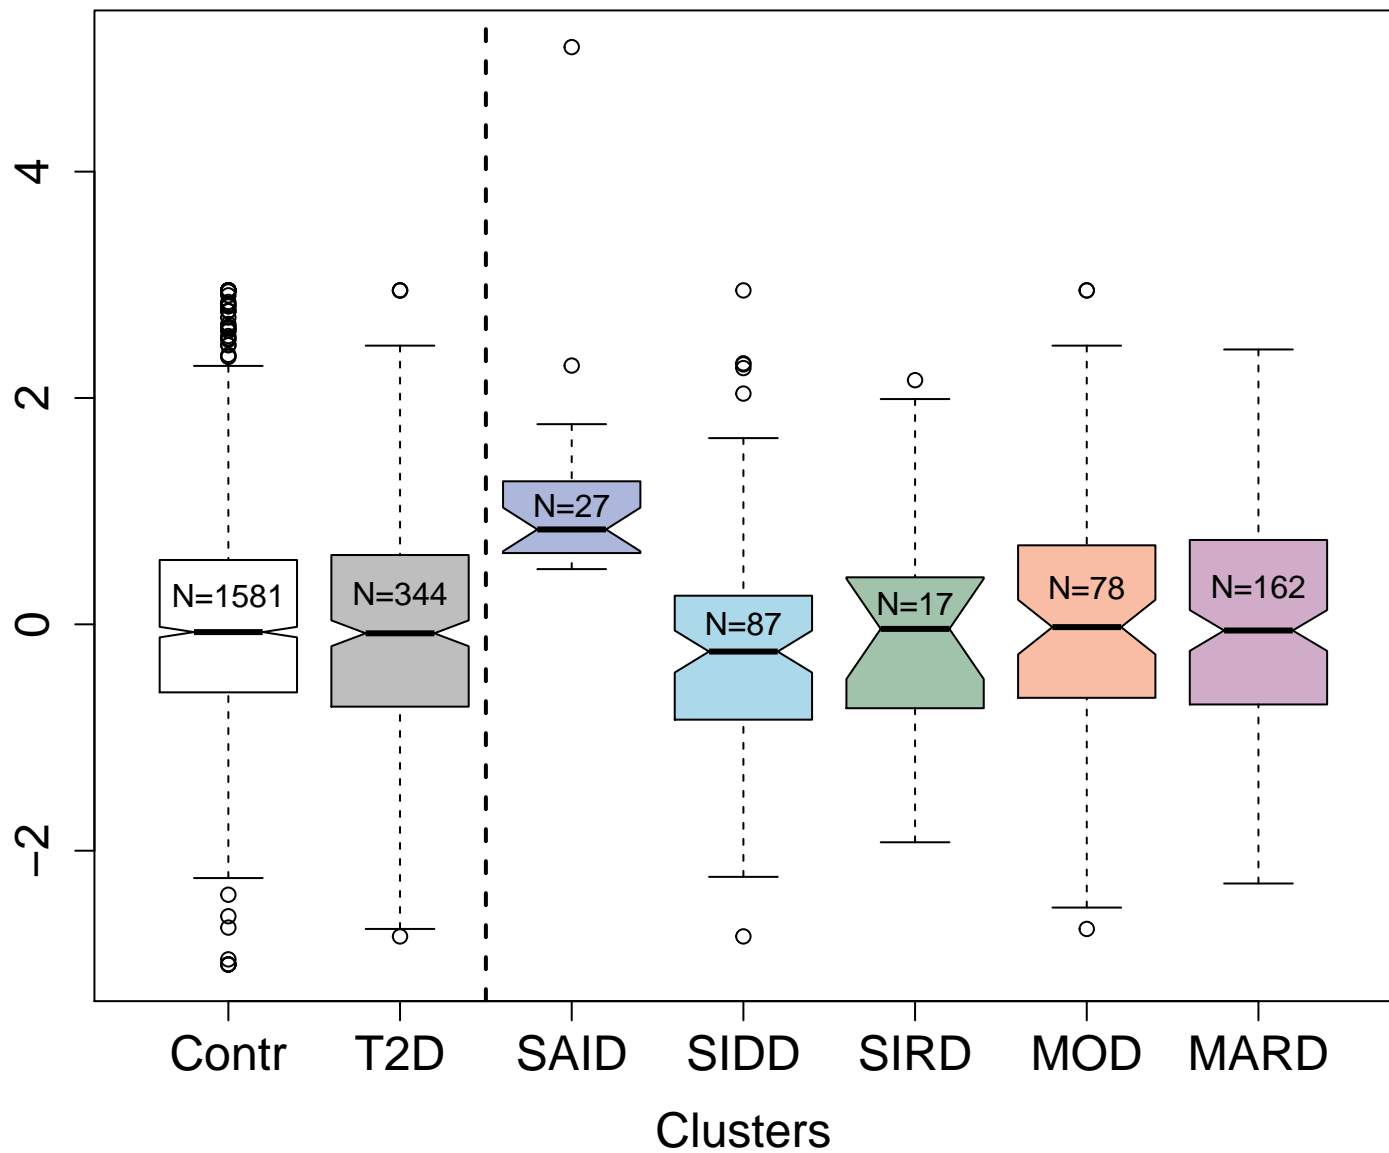

M47977 : X - 13844

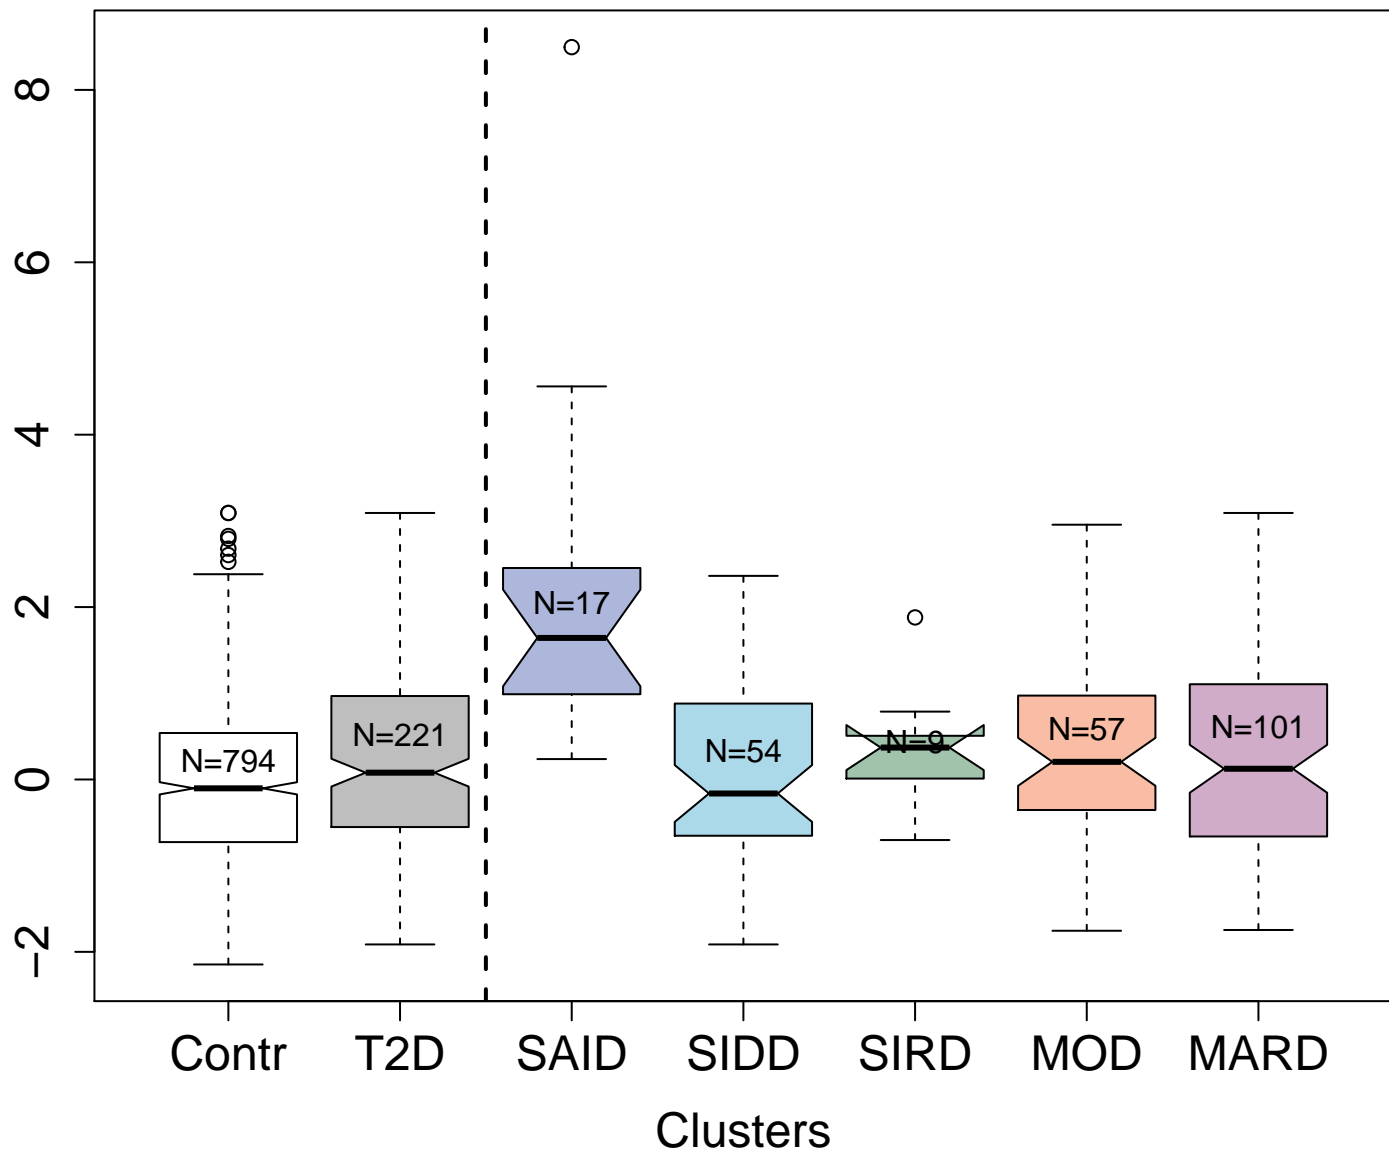

M15122 : glycerol

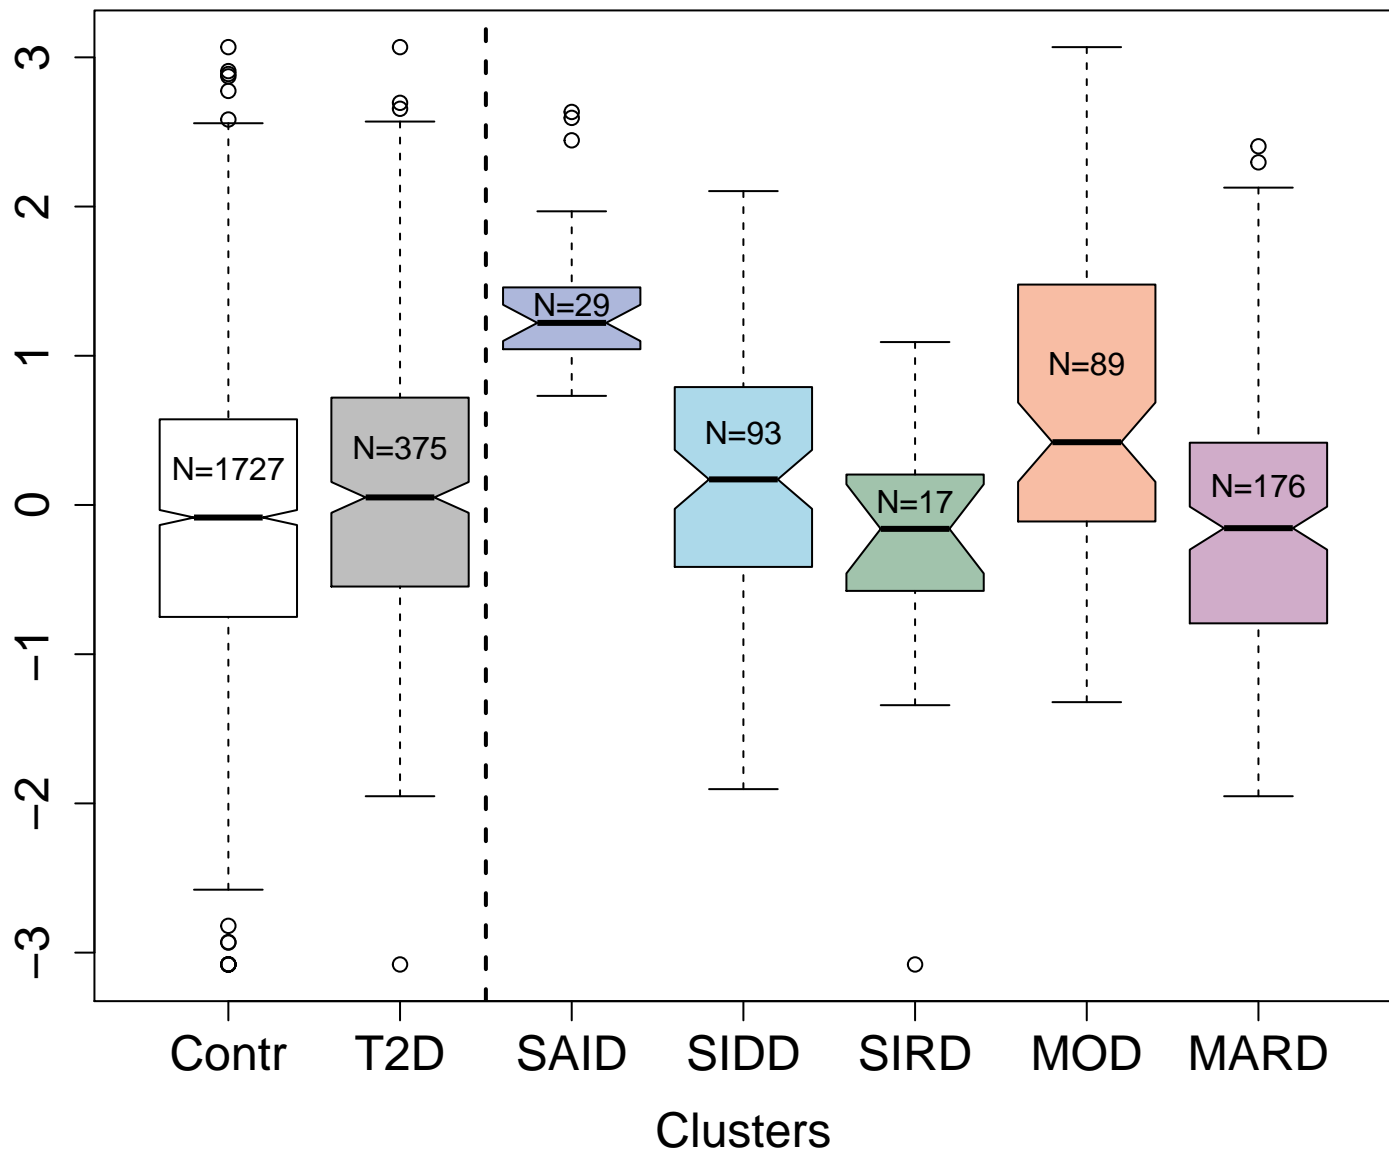



M42109 : phosphate

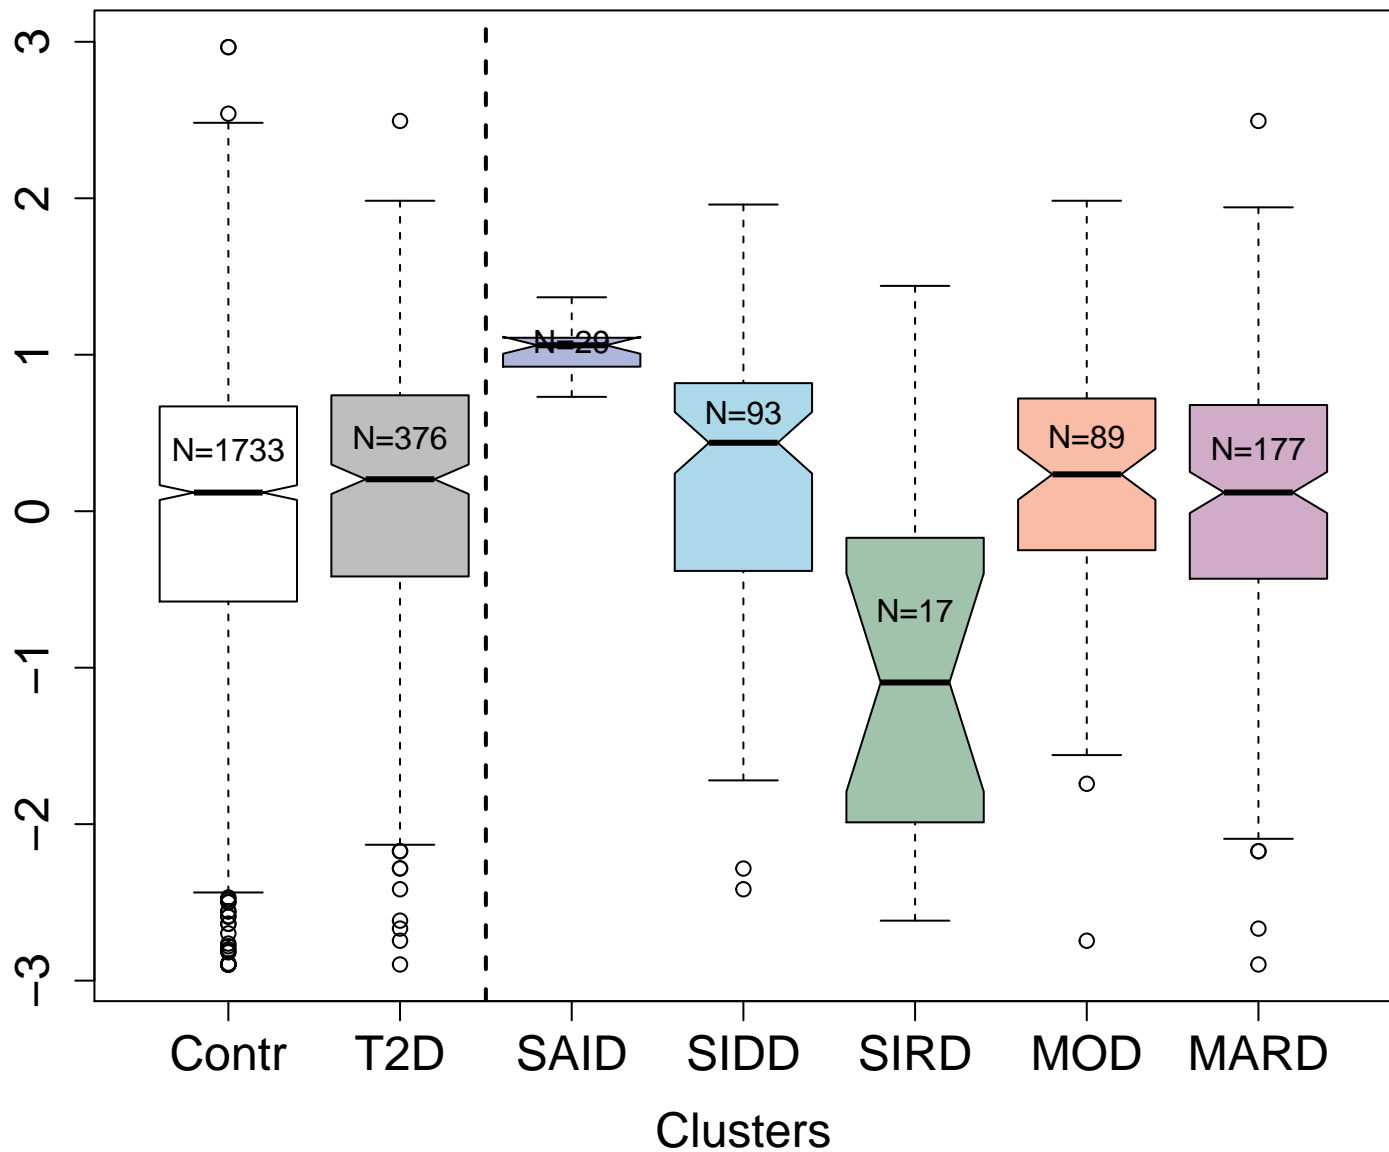

M46283 : X - 15461

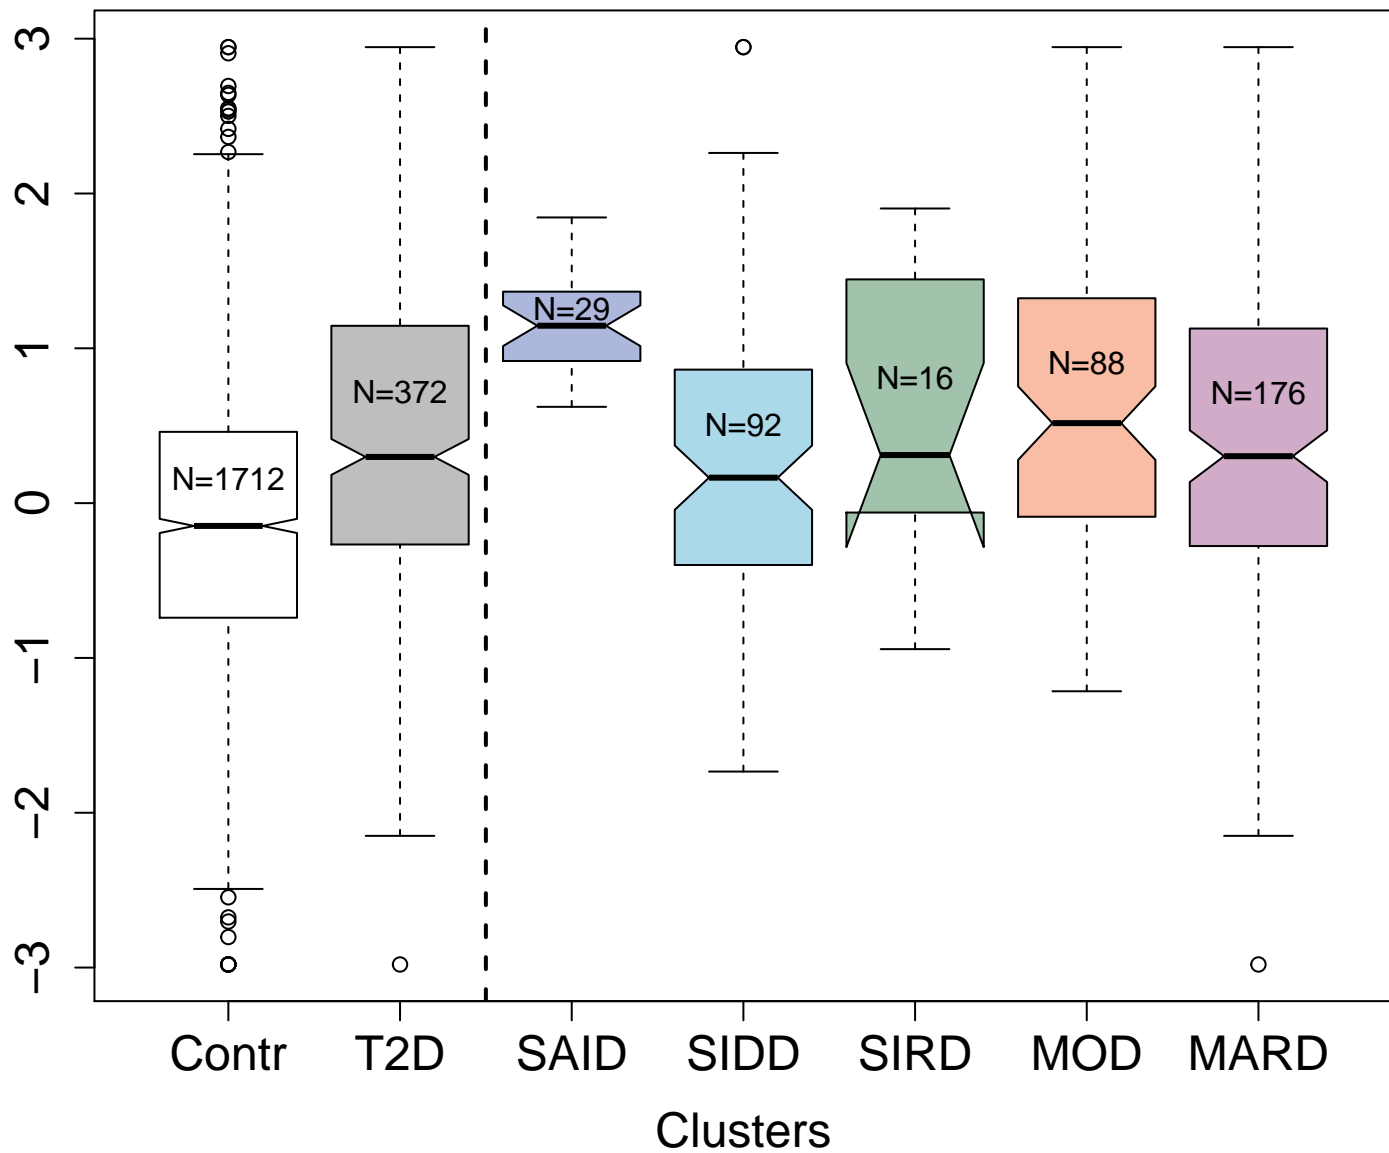

M49512 : X - 23636

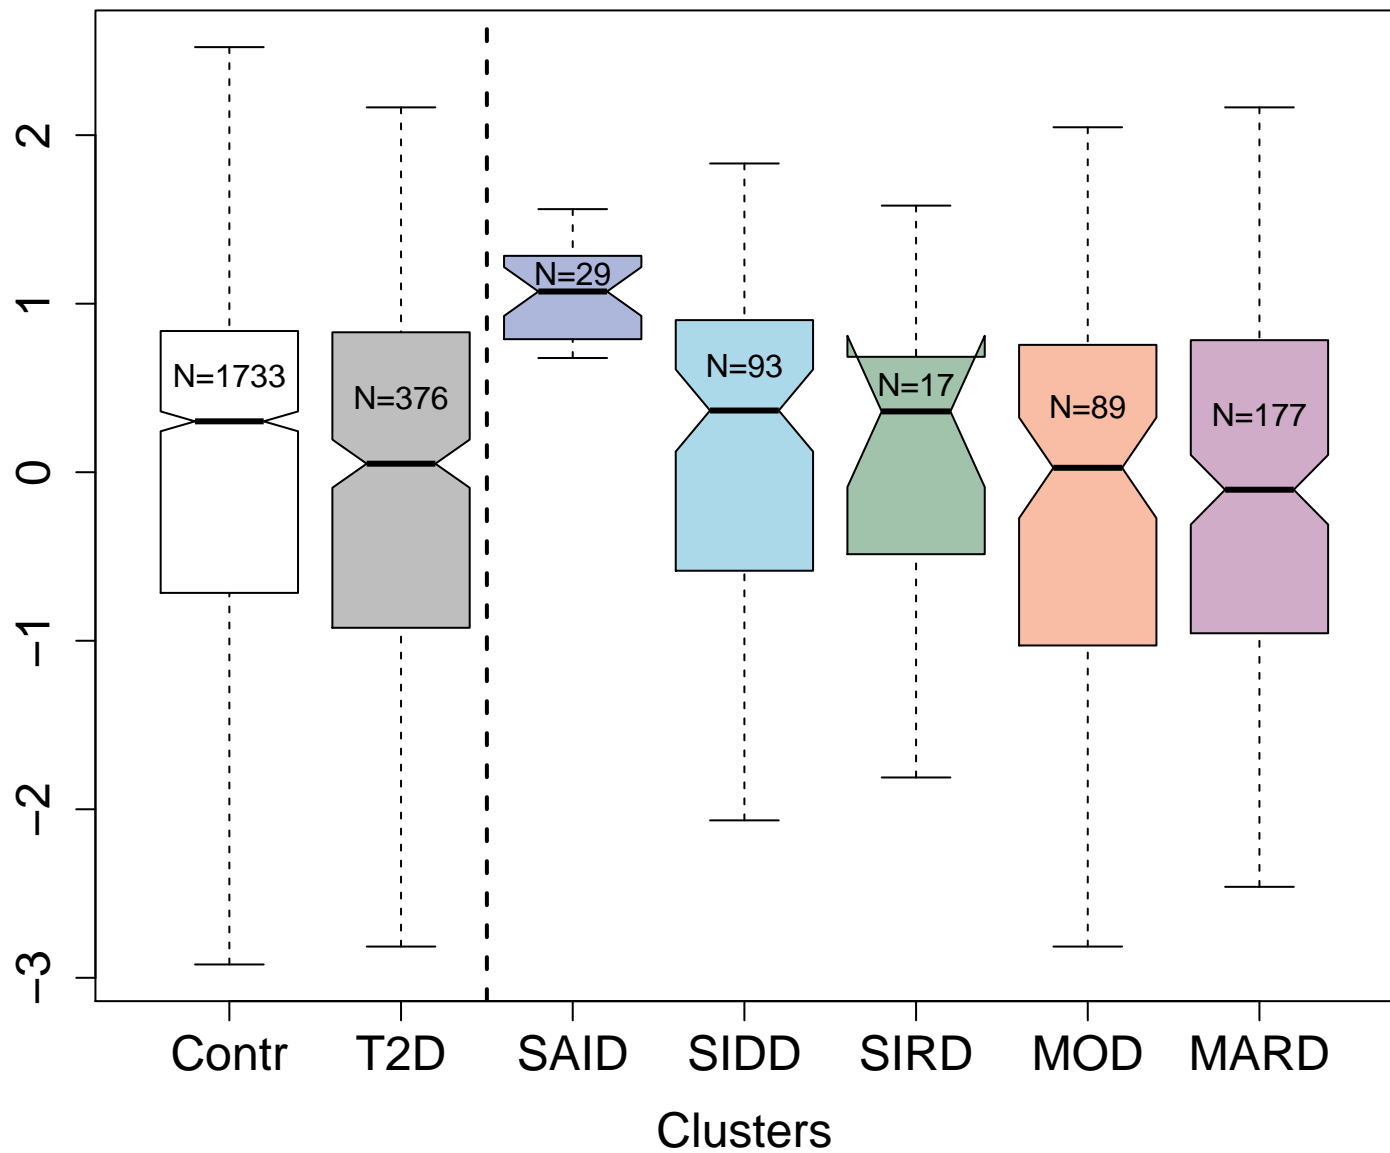

M46673 : X - 16576

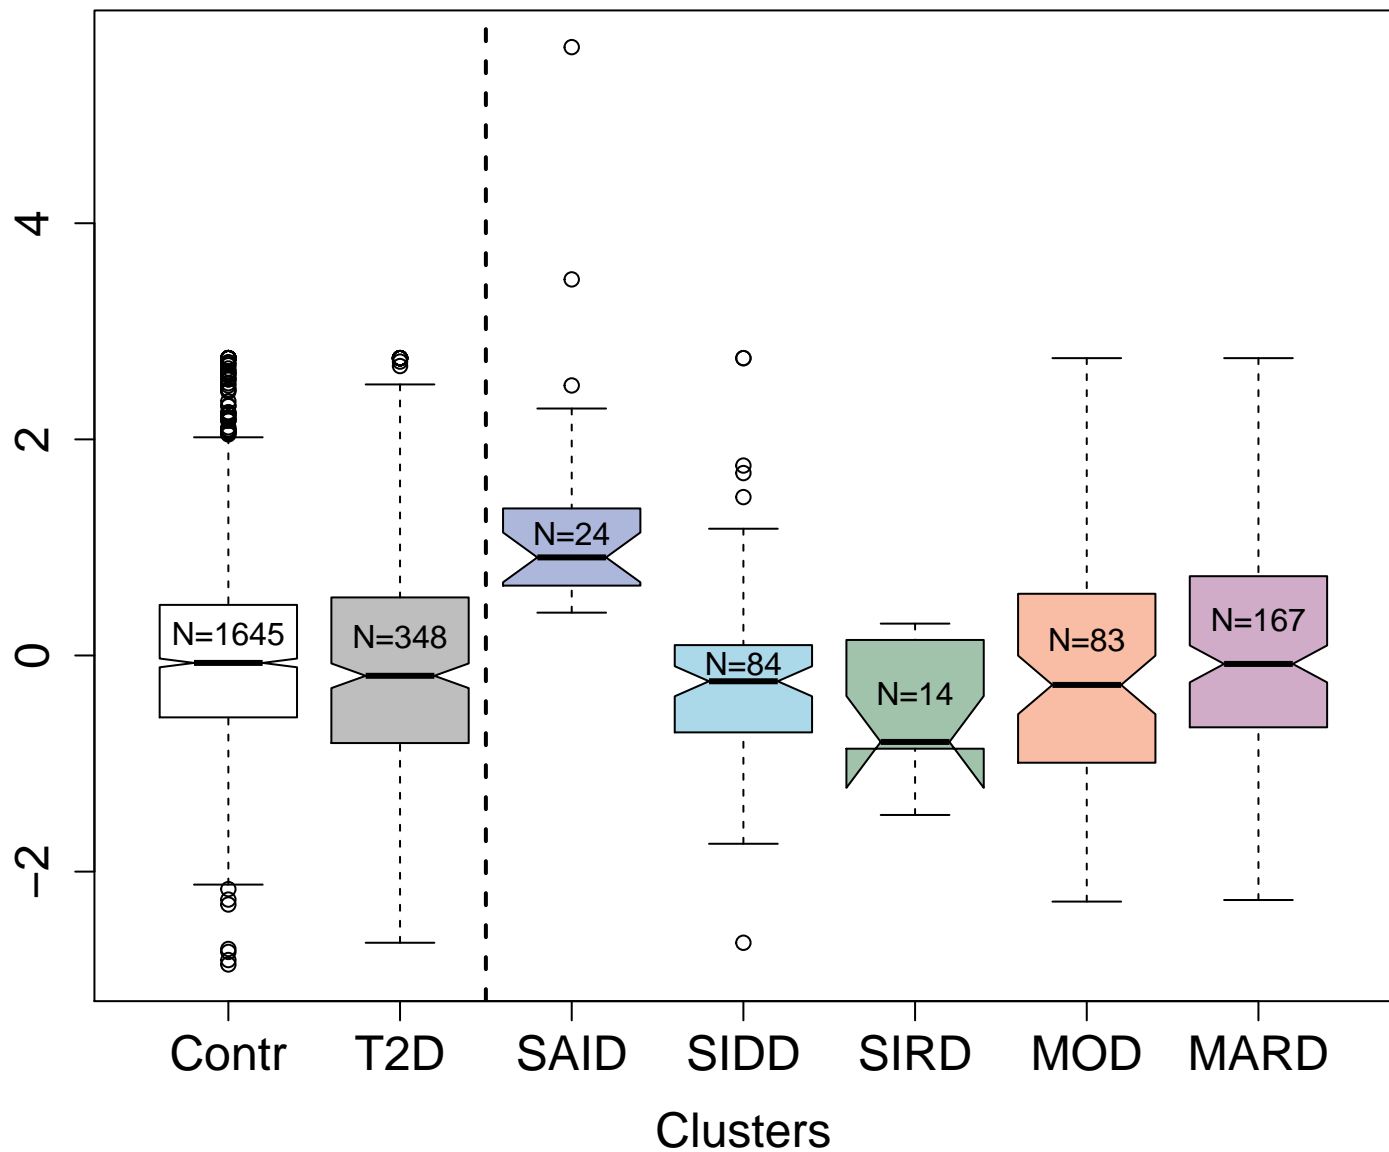

M46798 : oleoyl-linoleoyl-glycerol (18:1/18:2) [1]

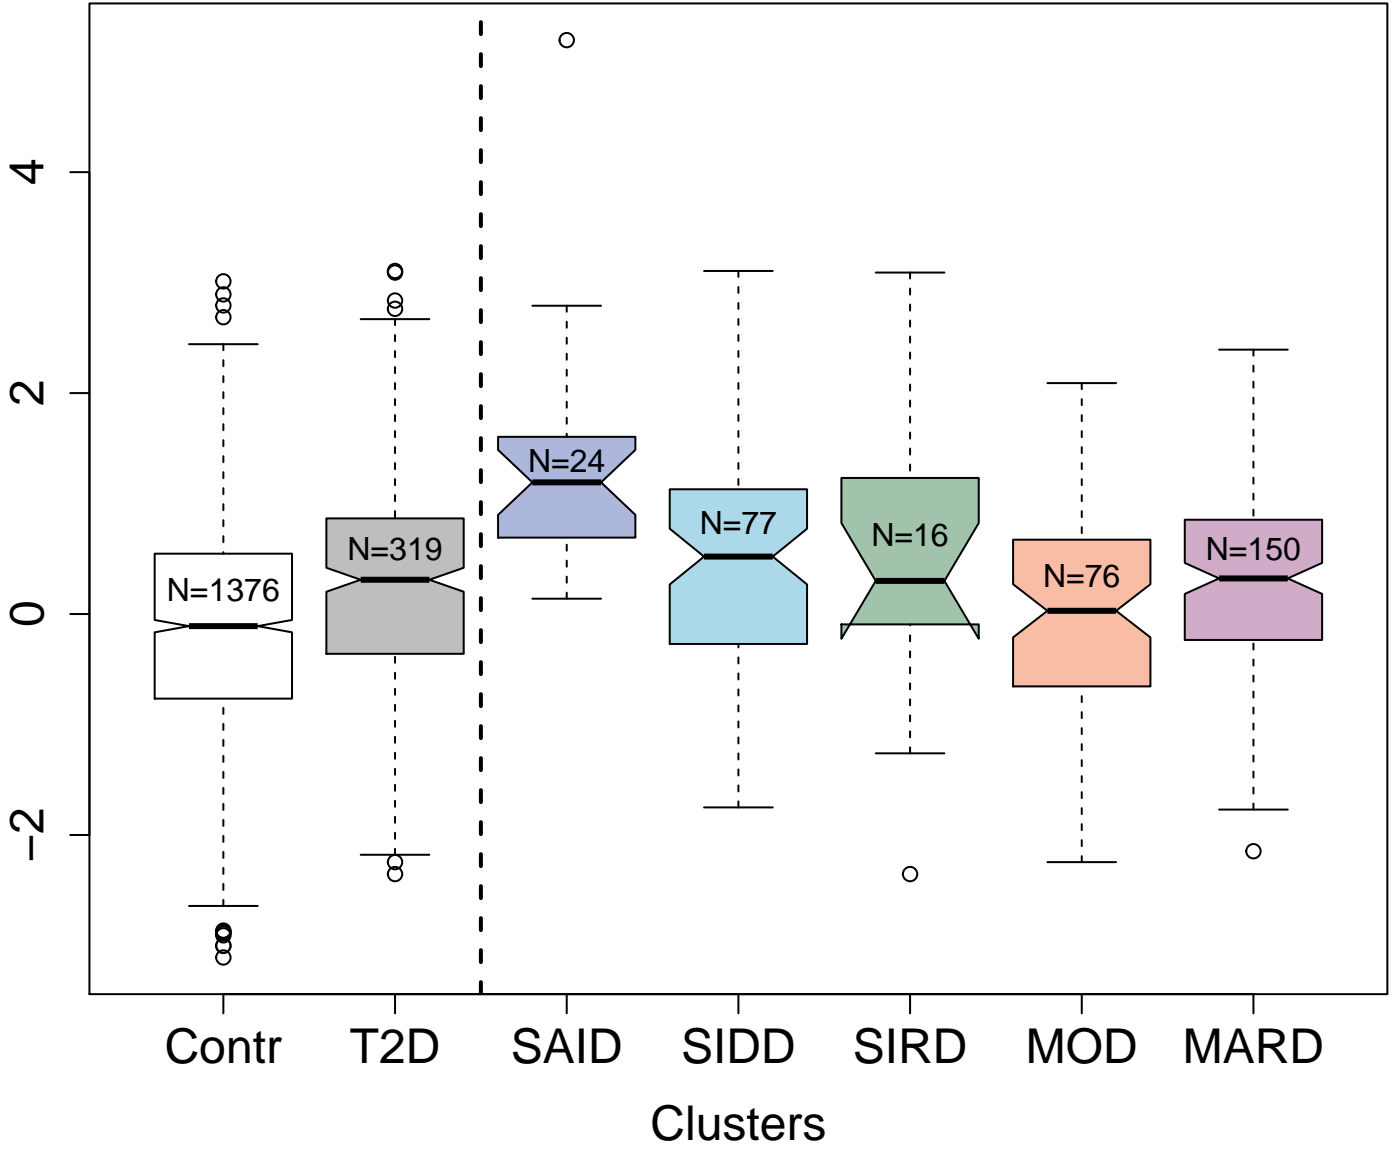

M53172 : X - 24736

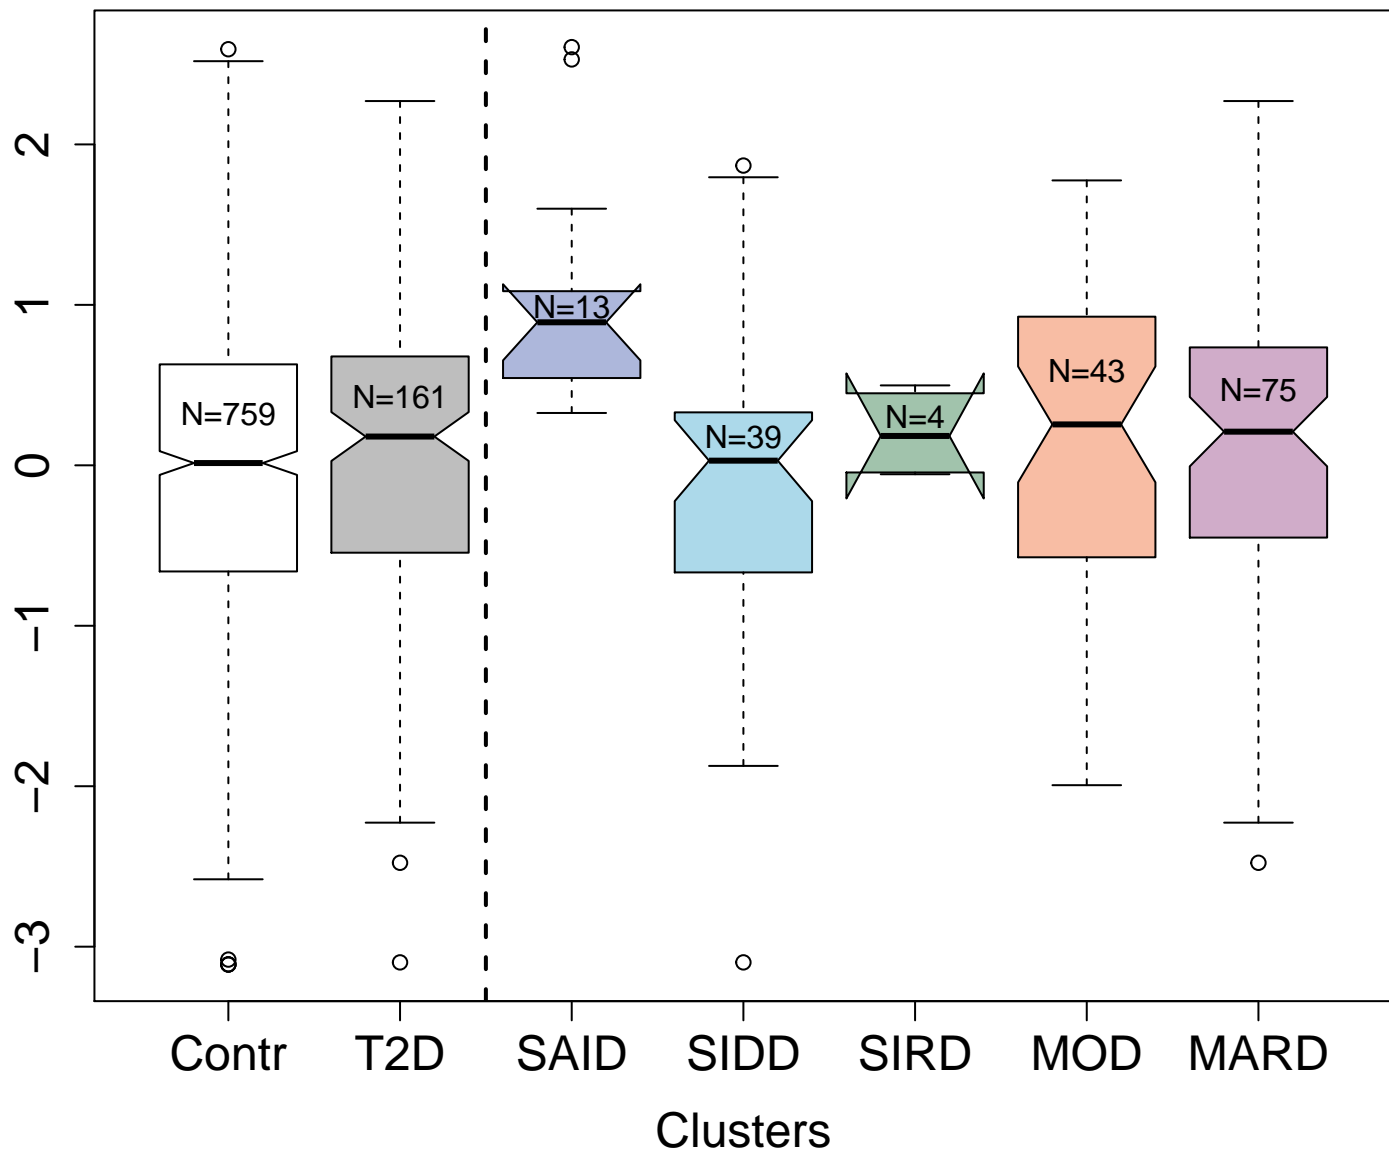

M607 : trans-urocanate

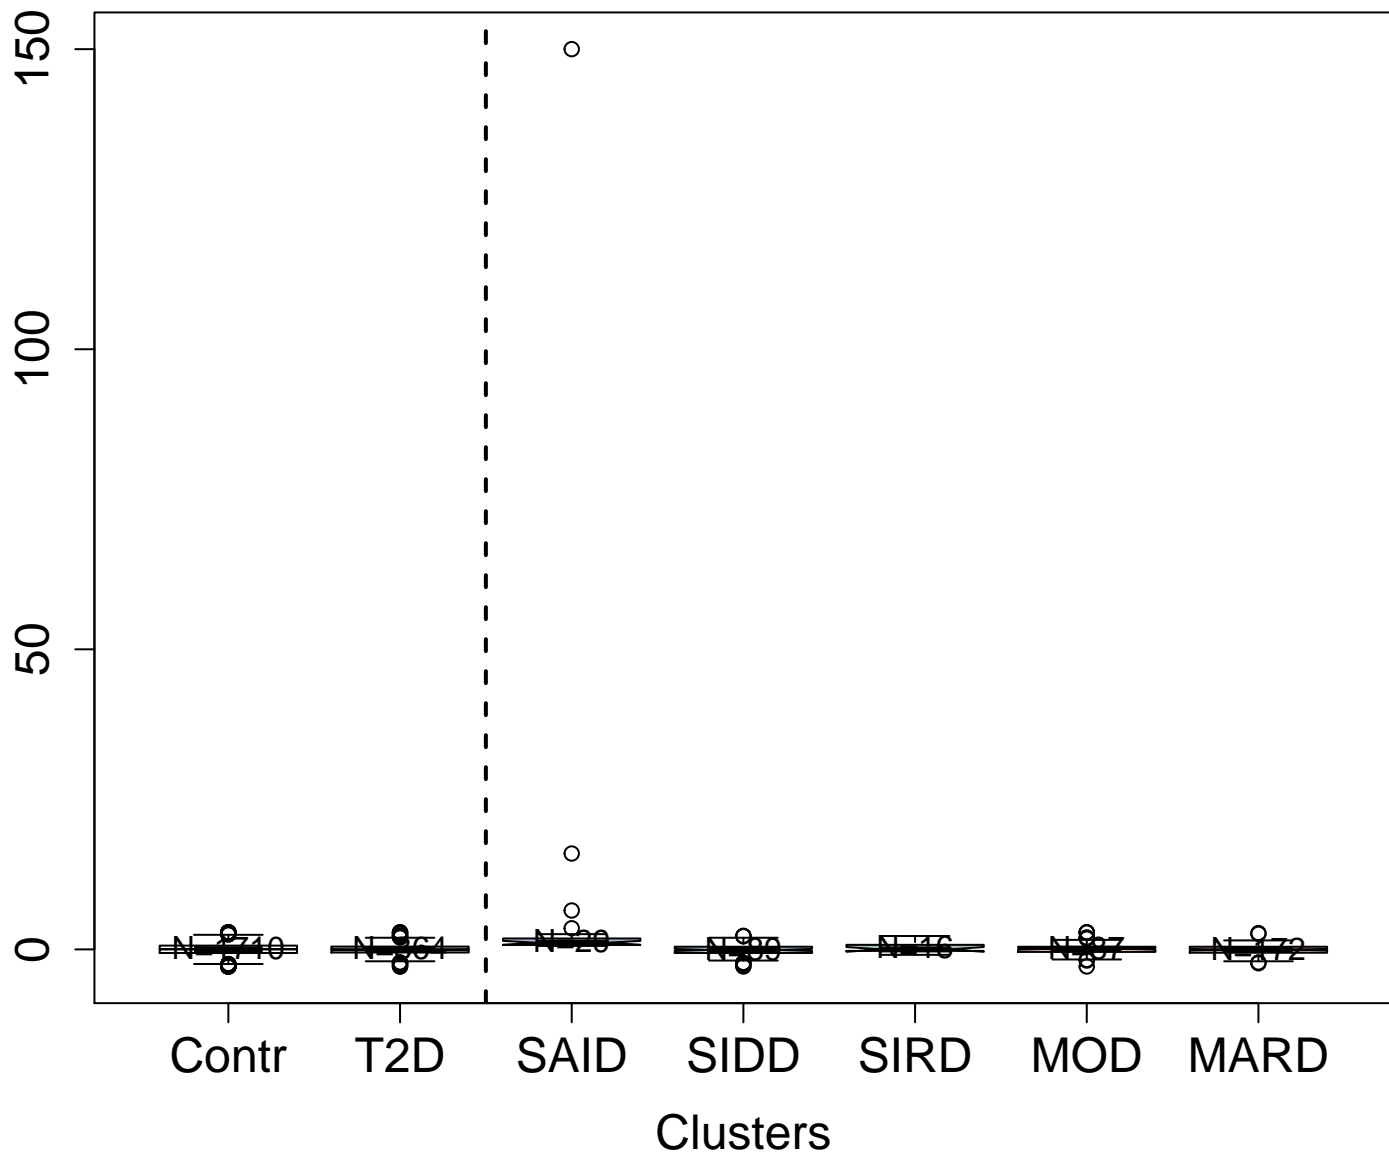

M46610 : X - 12007

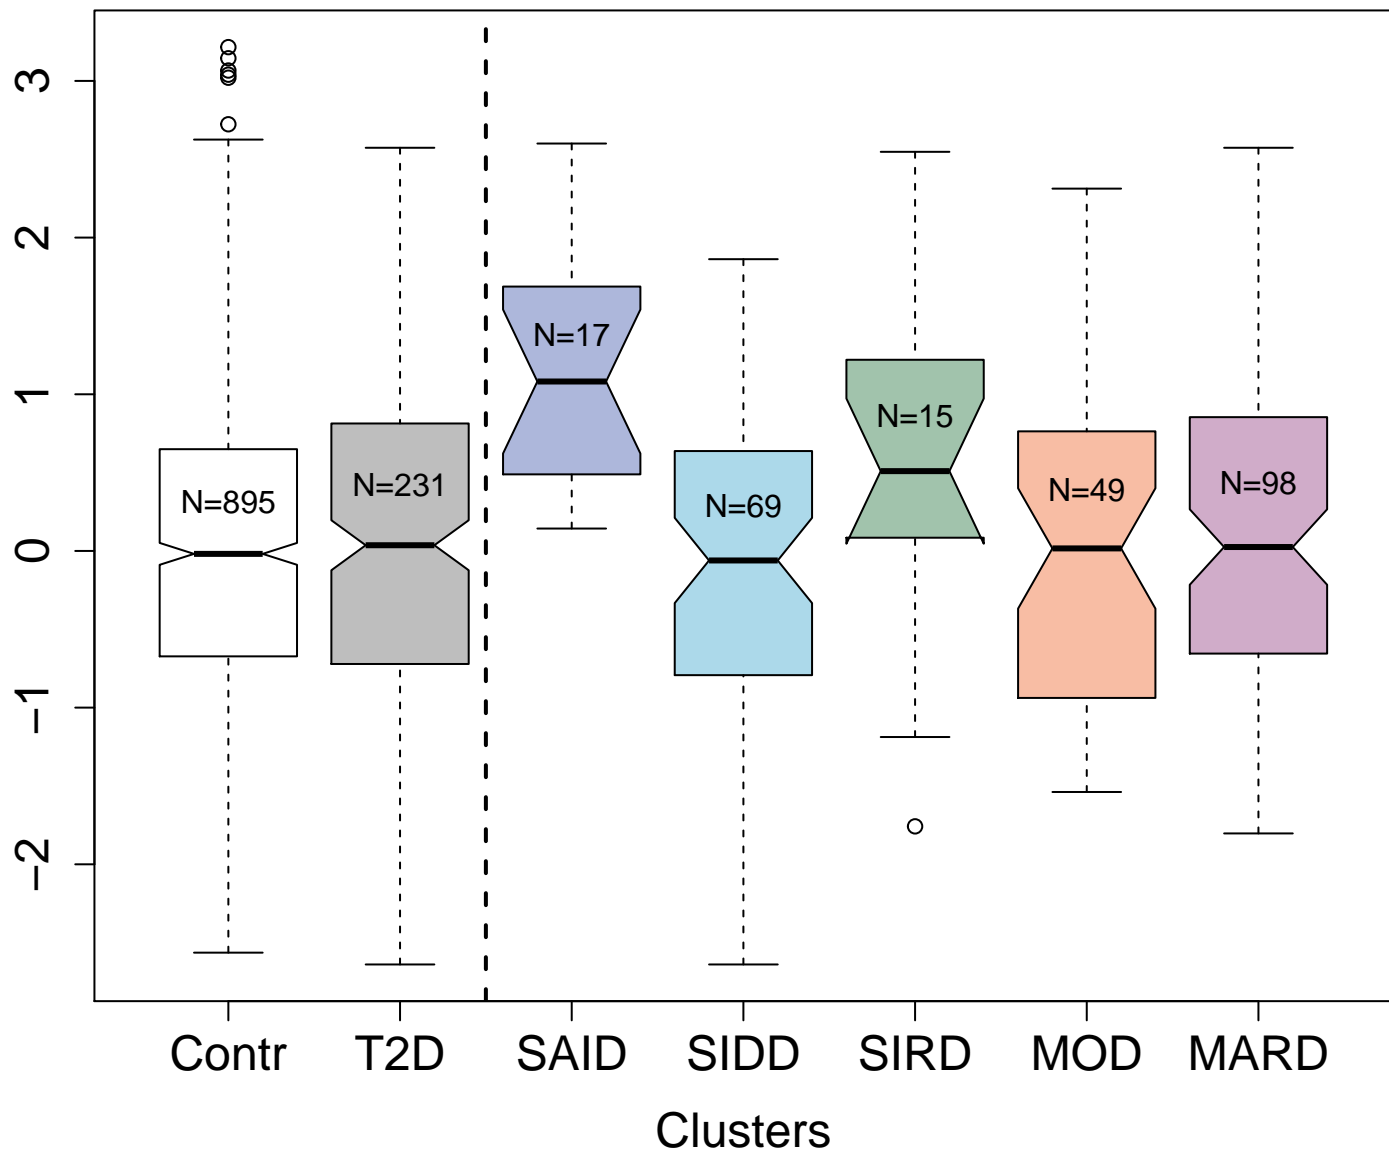



M2829 : N-formylmethionine

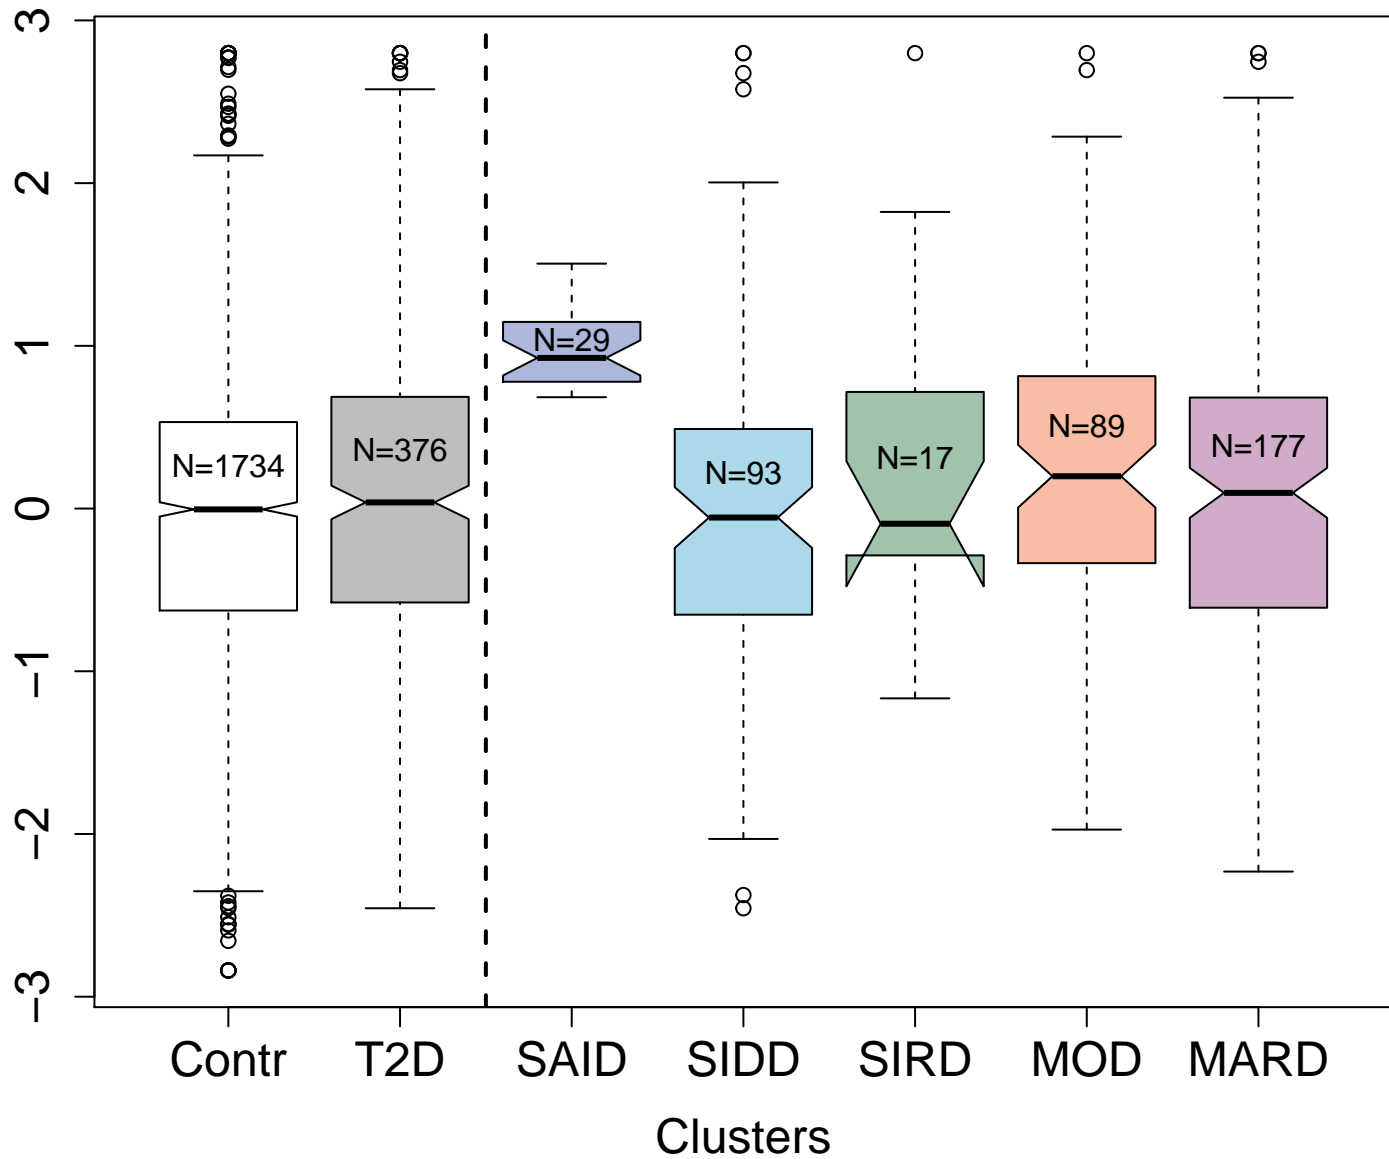

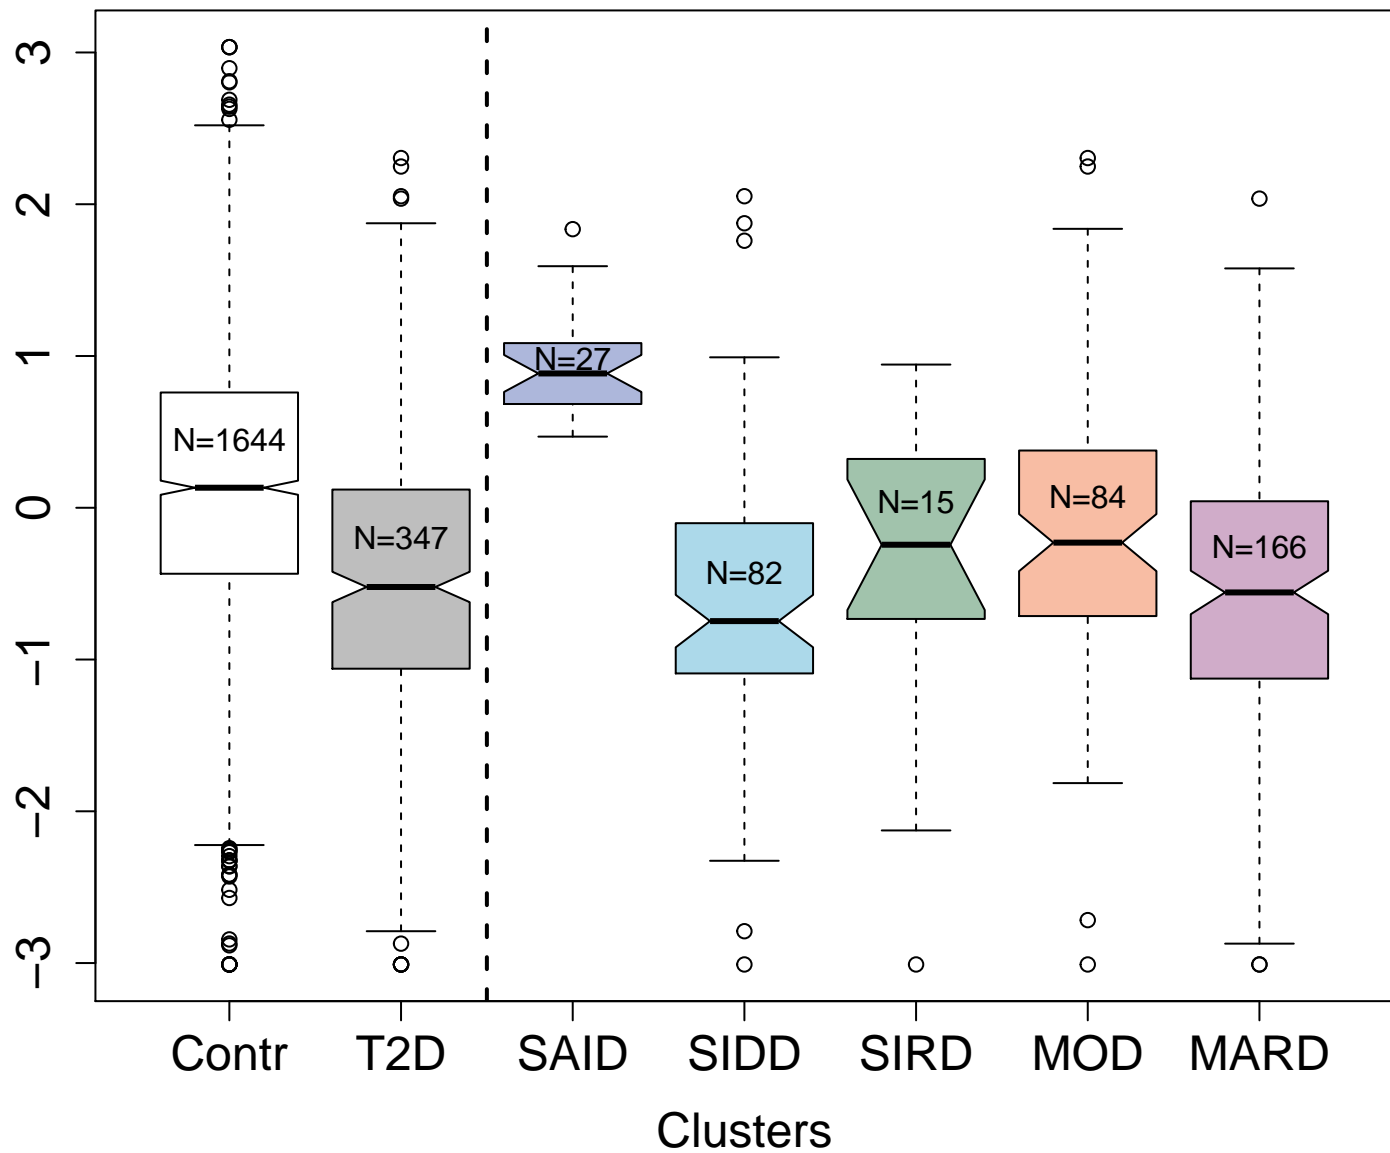

M62526 : lithocholate sulfate (1)

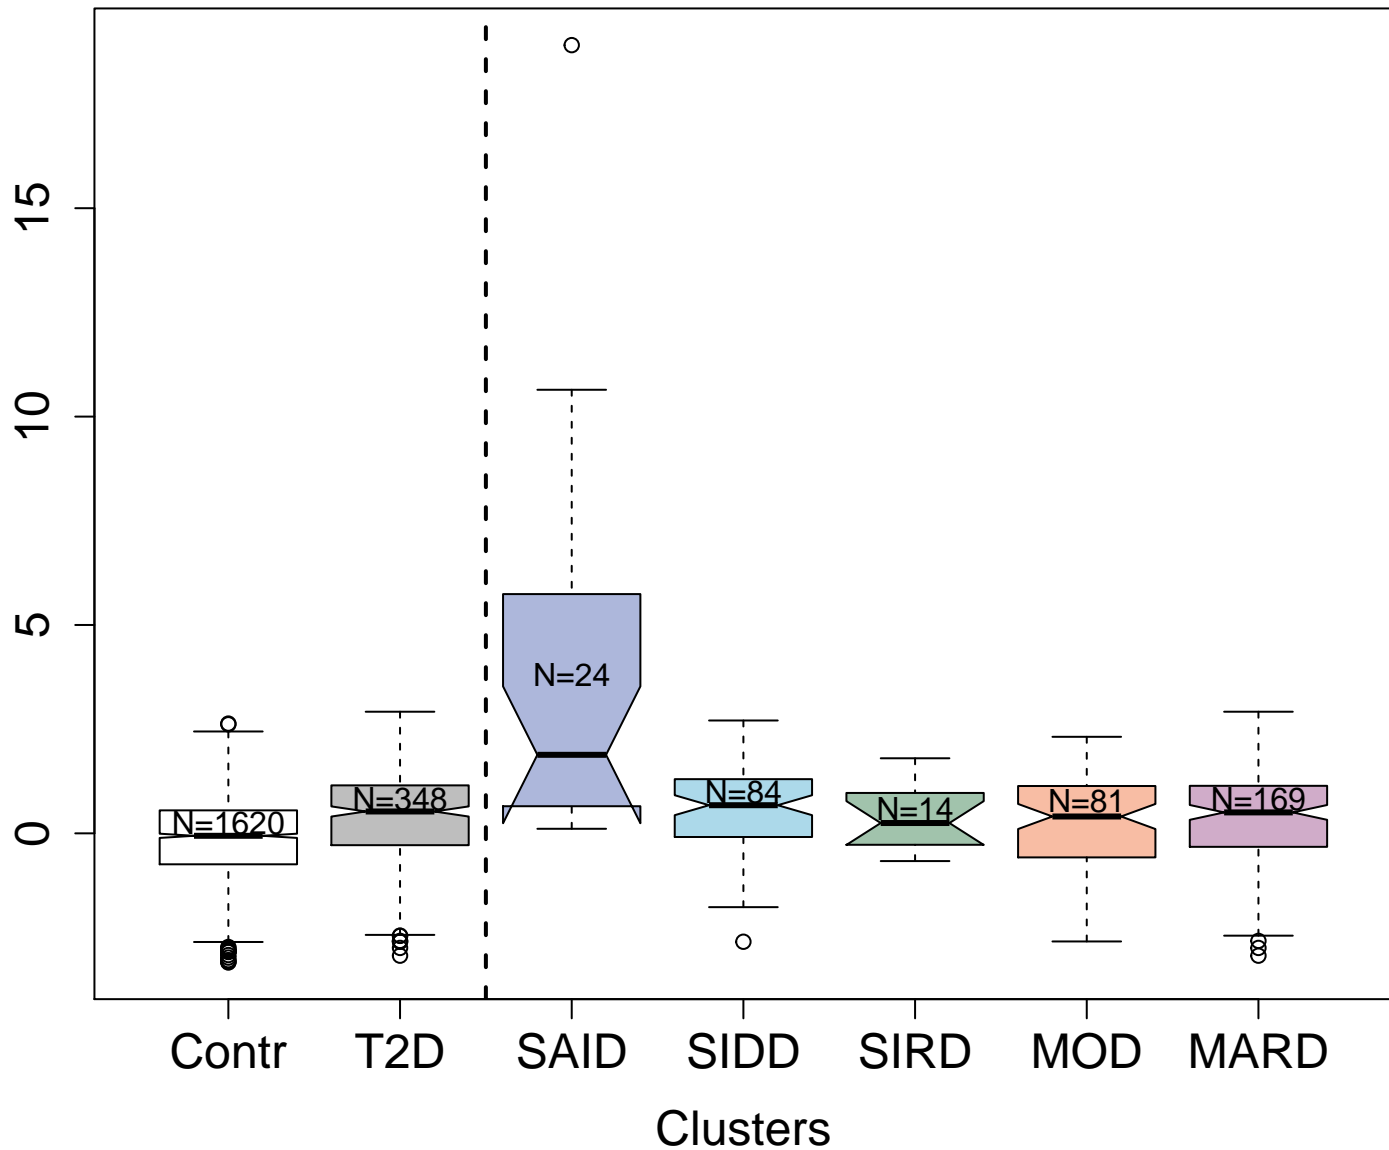

M35631 : 1-palmitoyl-GPE (16:0)

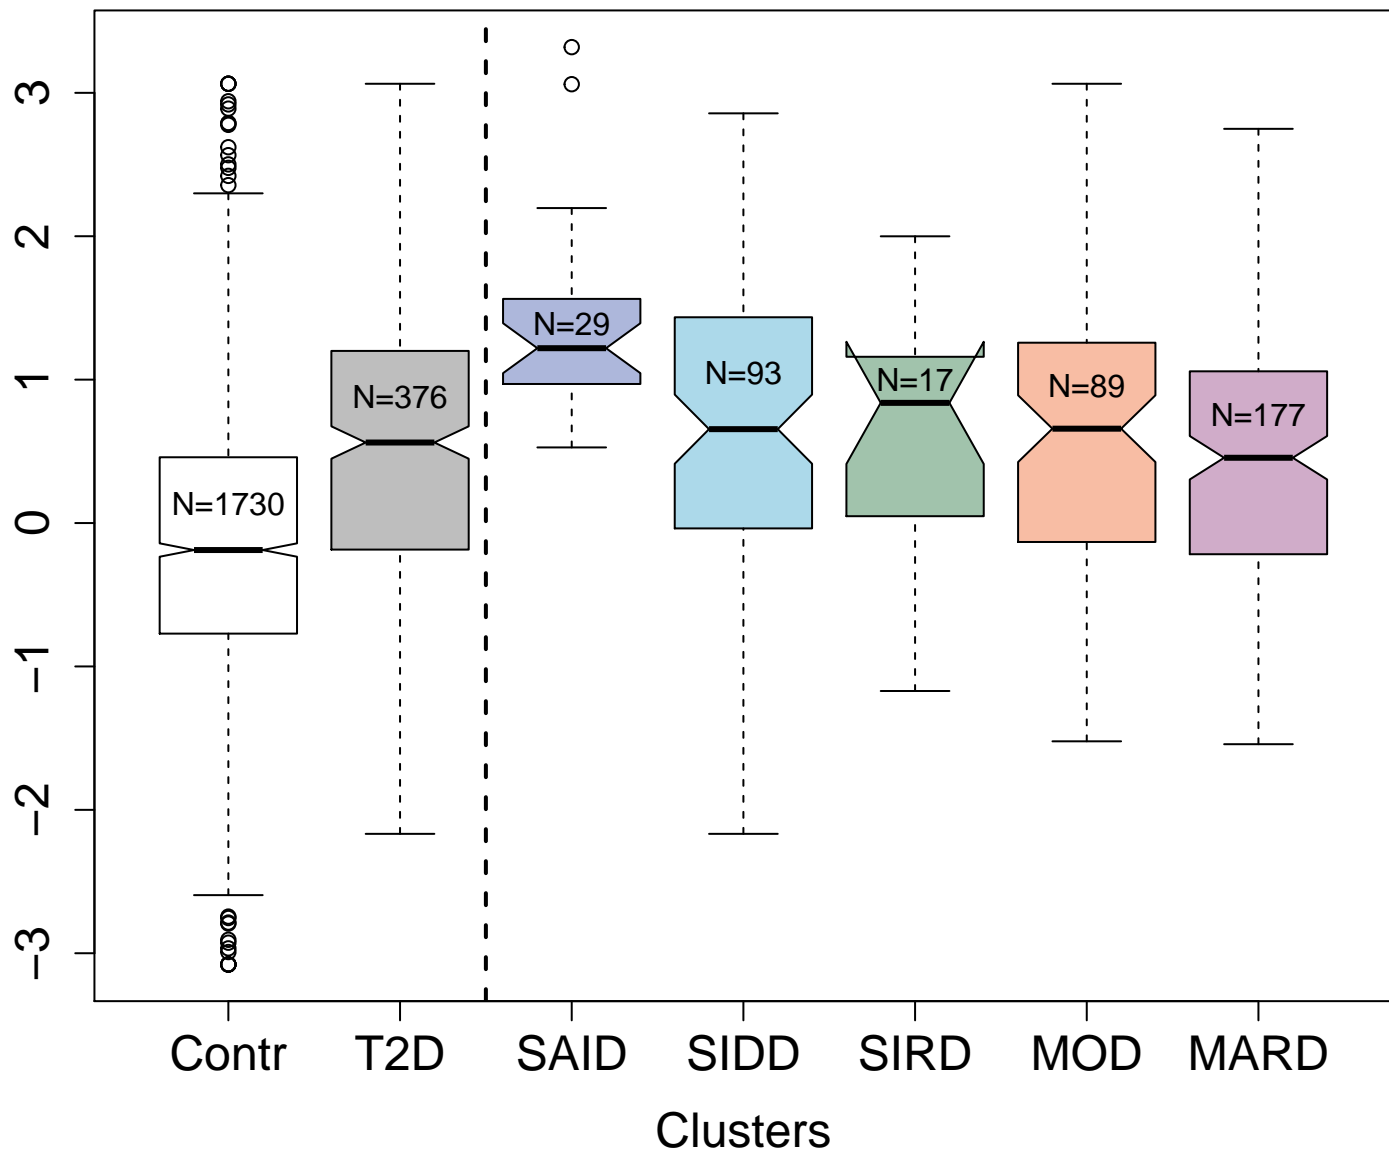

M46970 : X - 17676

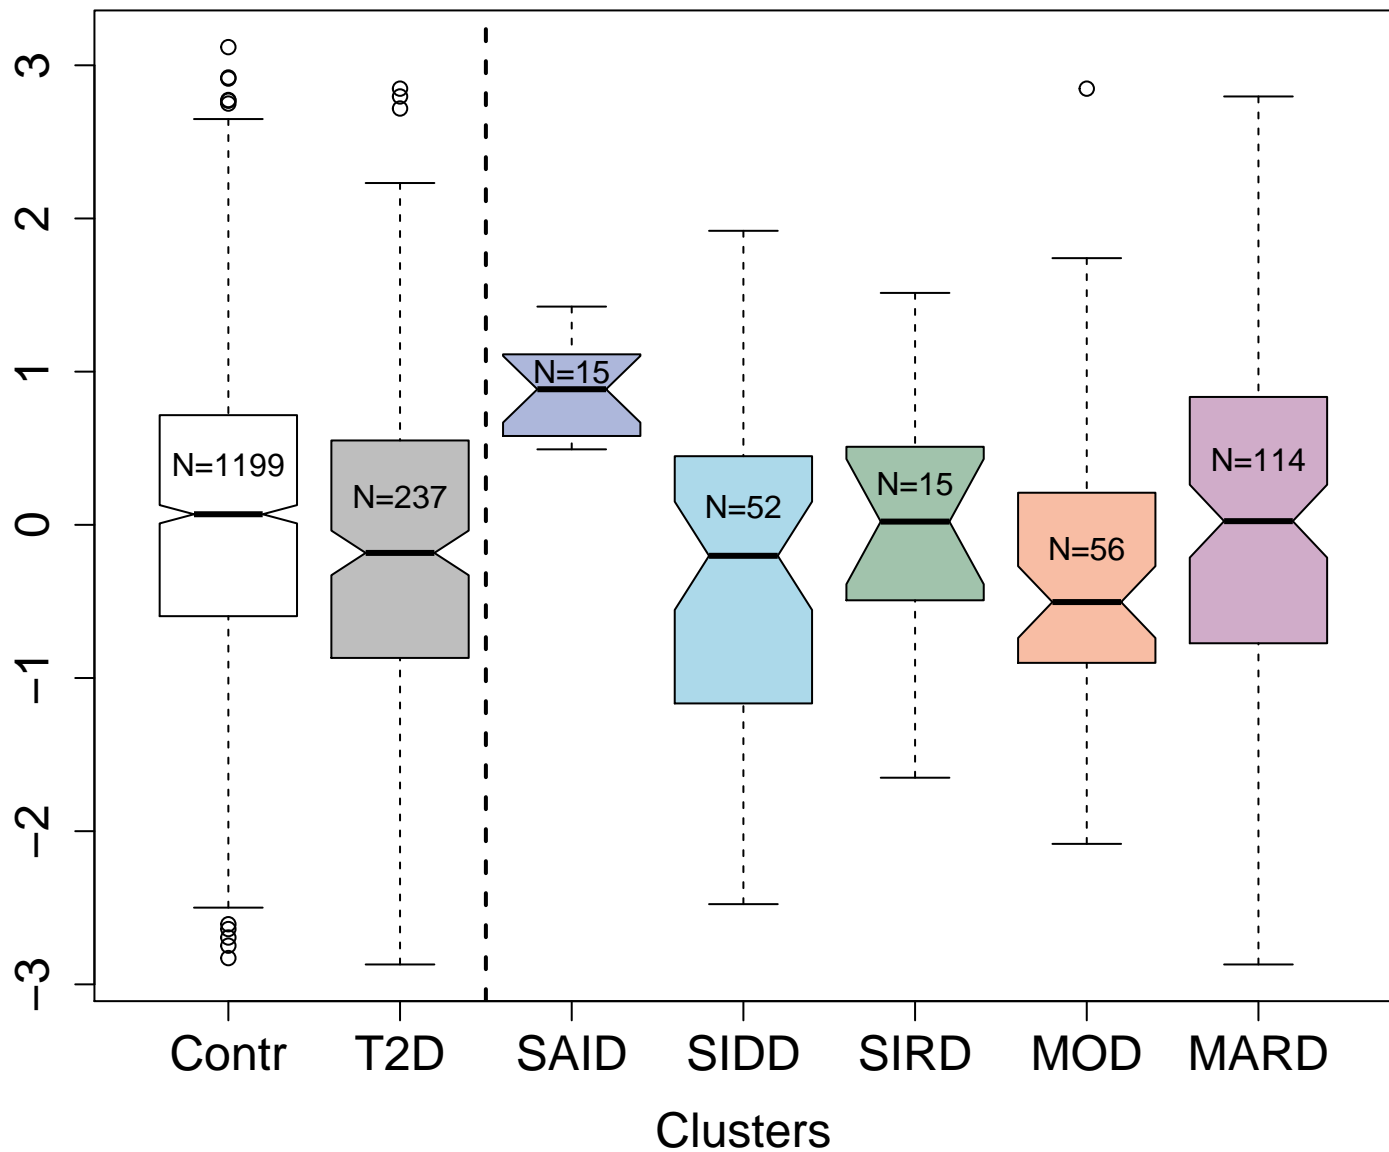

M39837 : docosadioate (C22-DC)

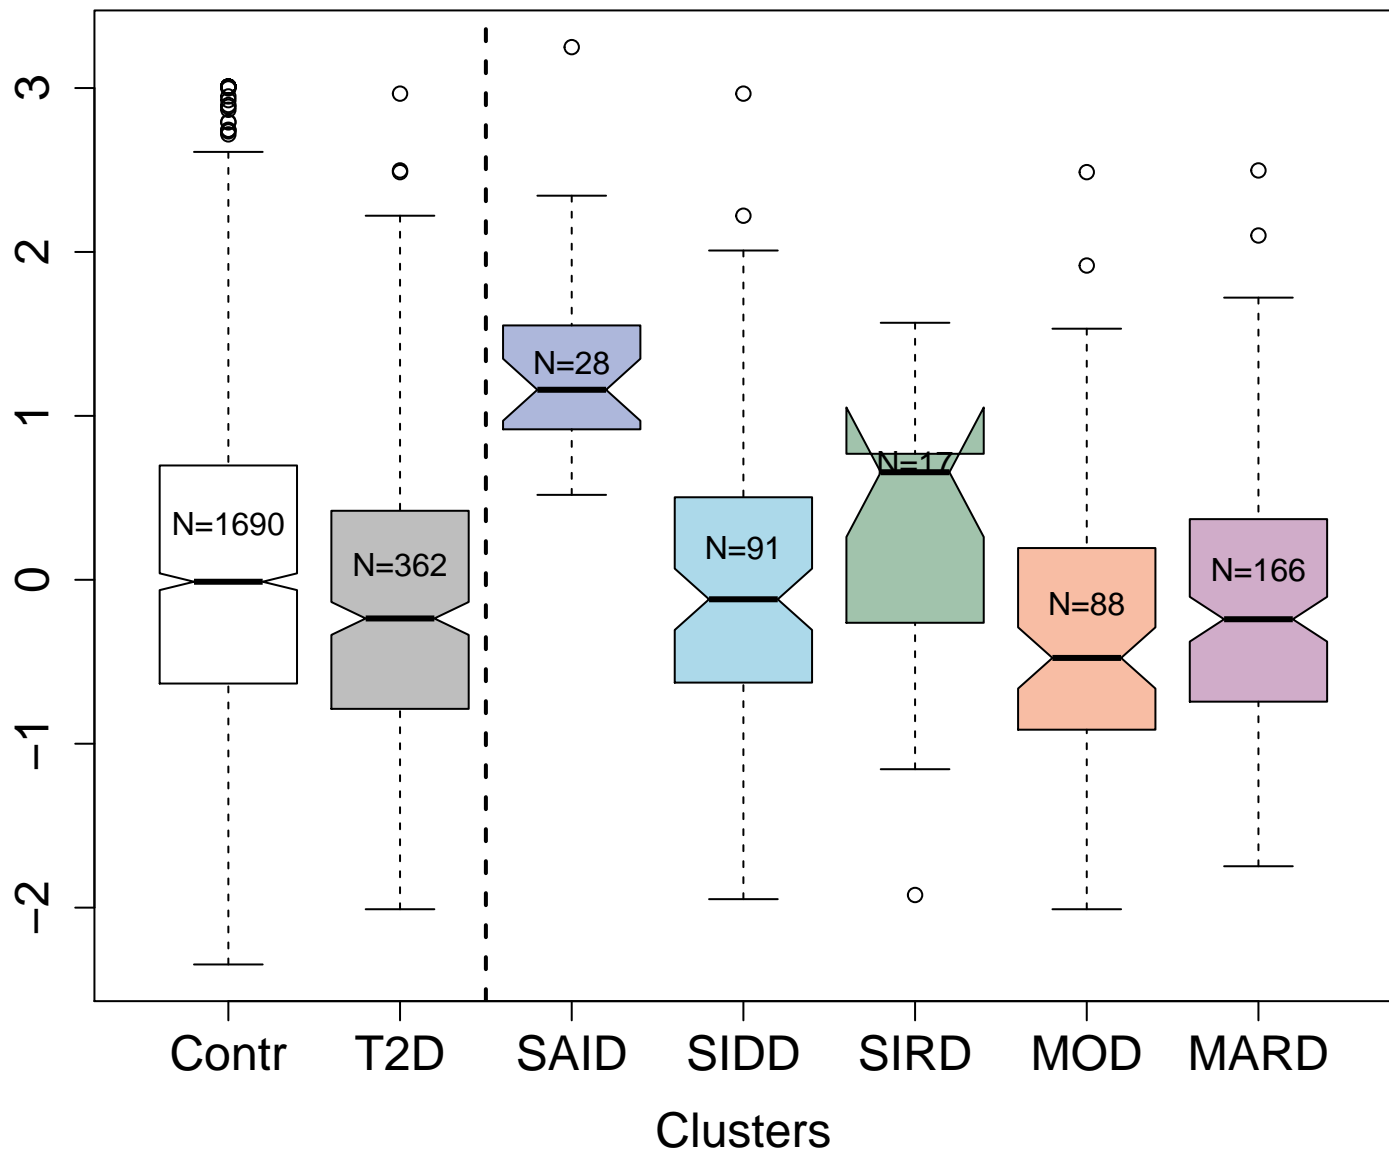

M48081 : X - 22776

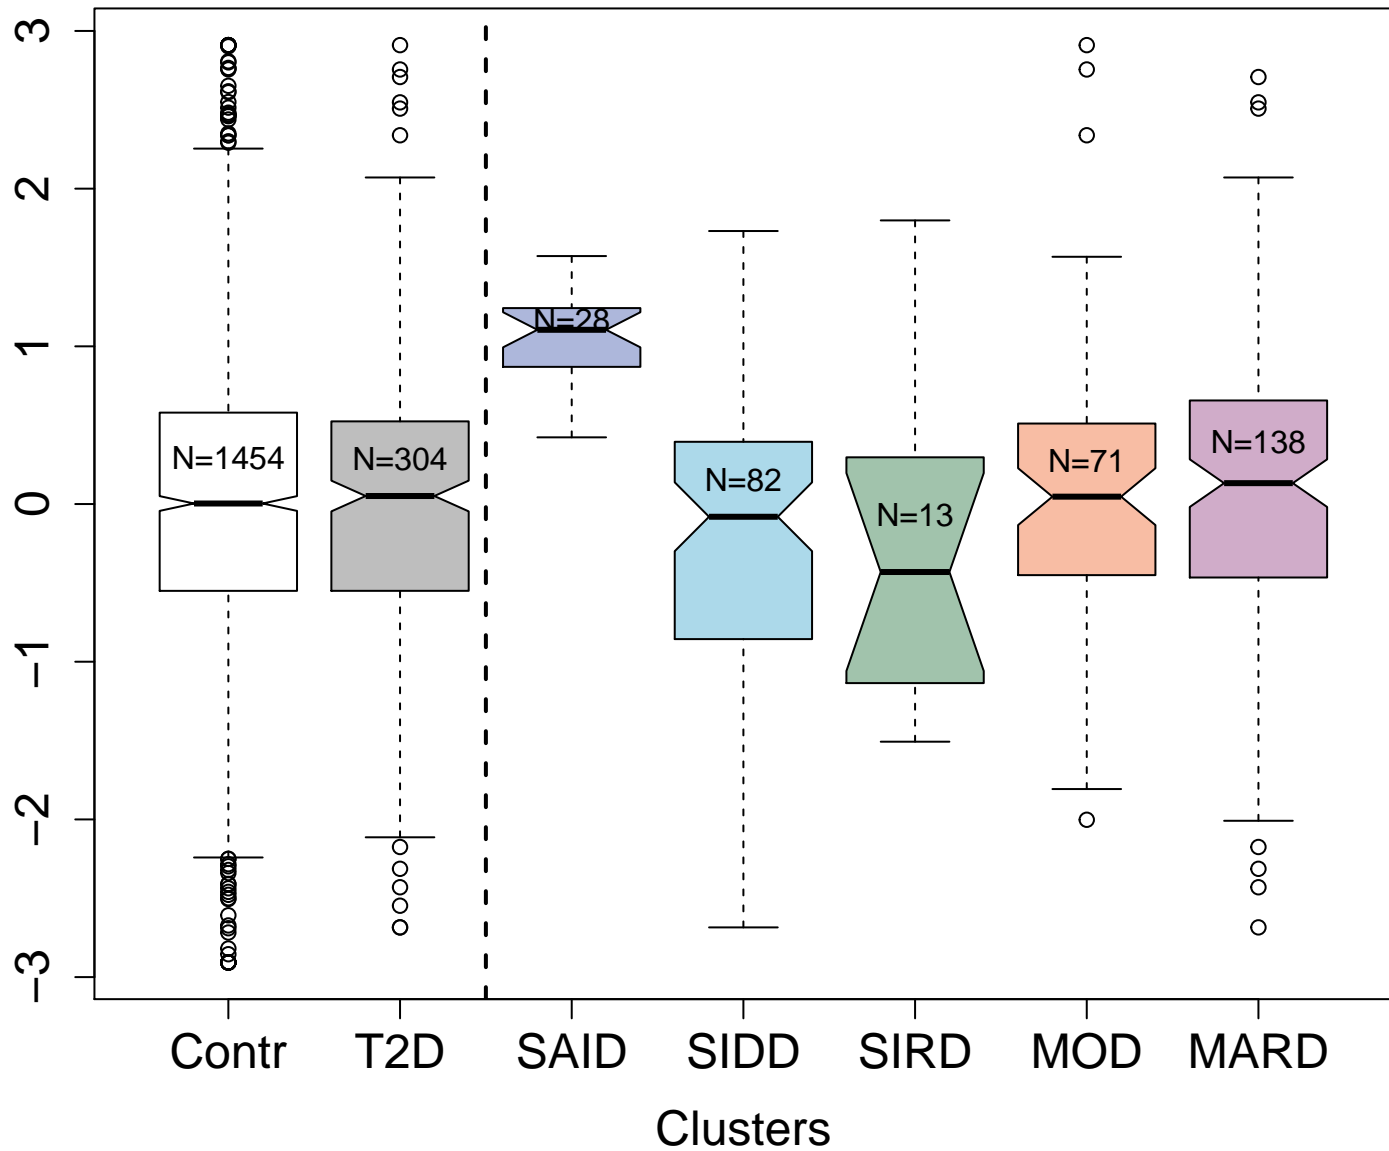

M48187 : N-acetyltaurine

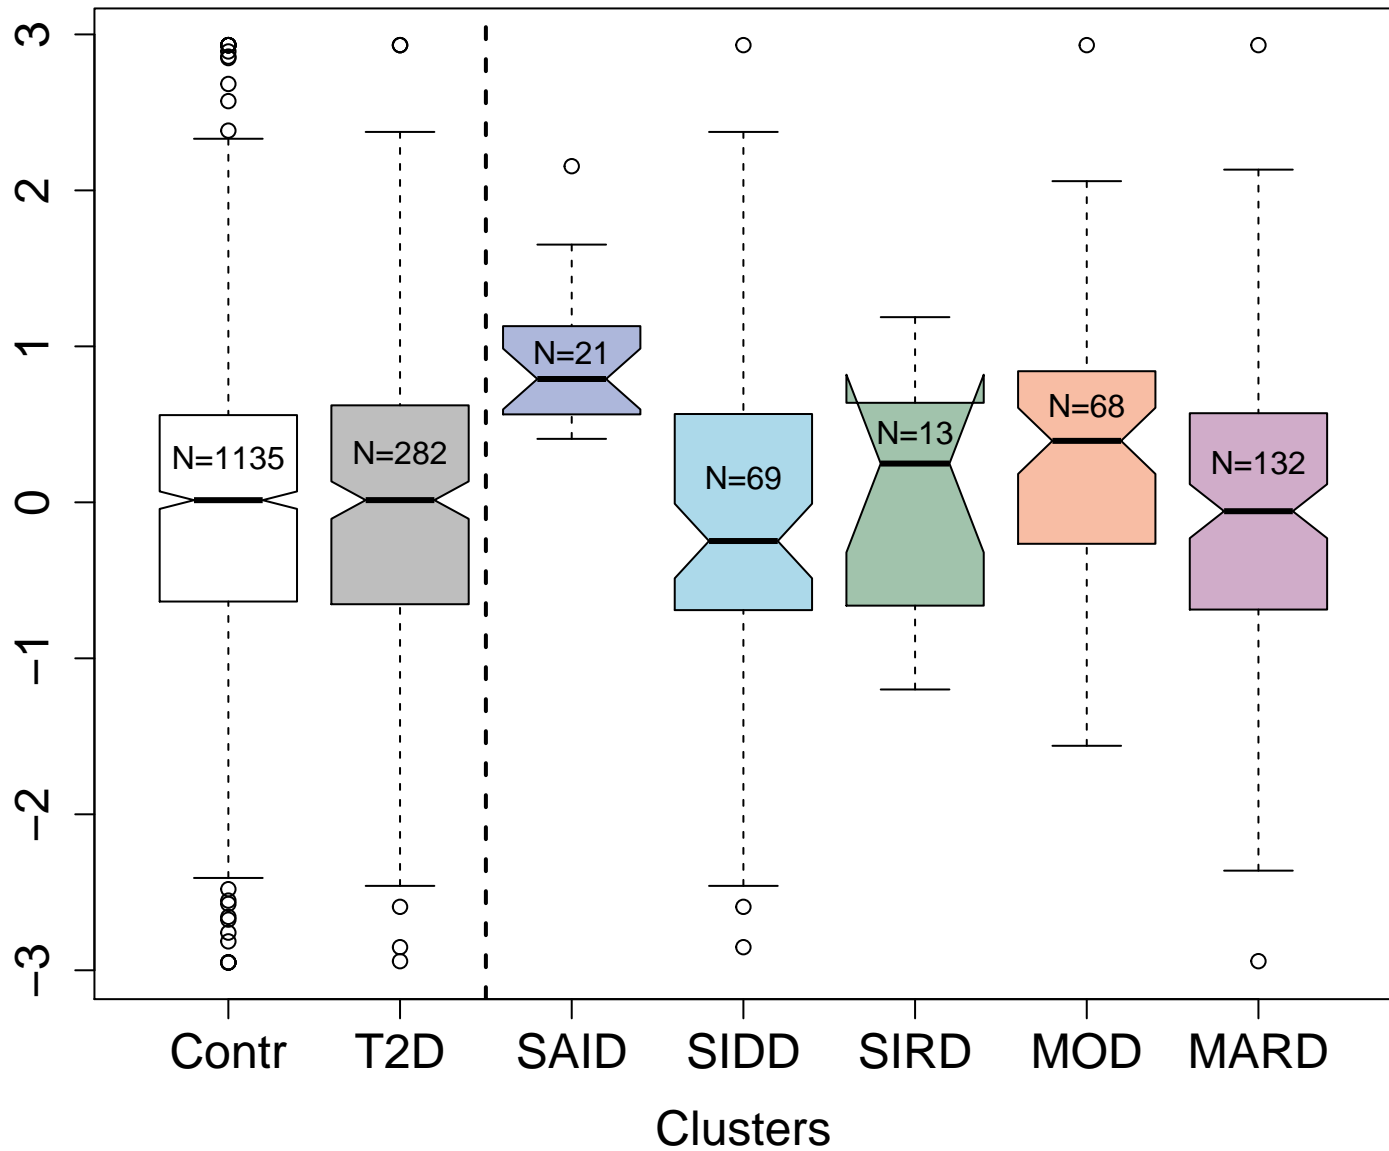



M57516 : cerotoylcarnitine (C26)\*

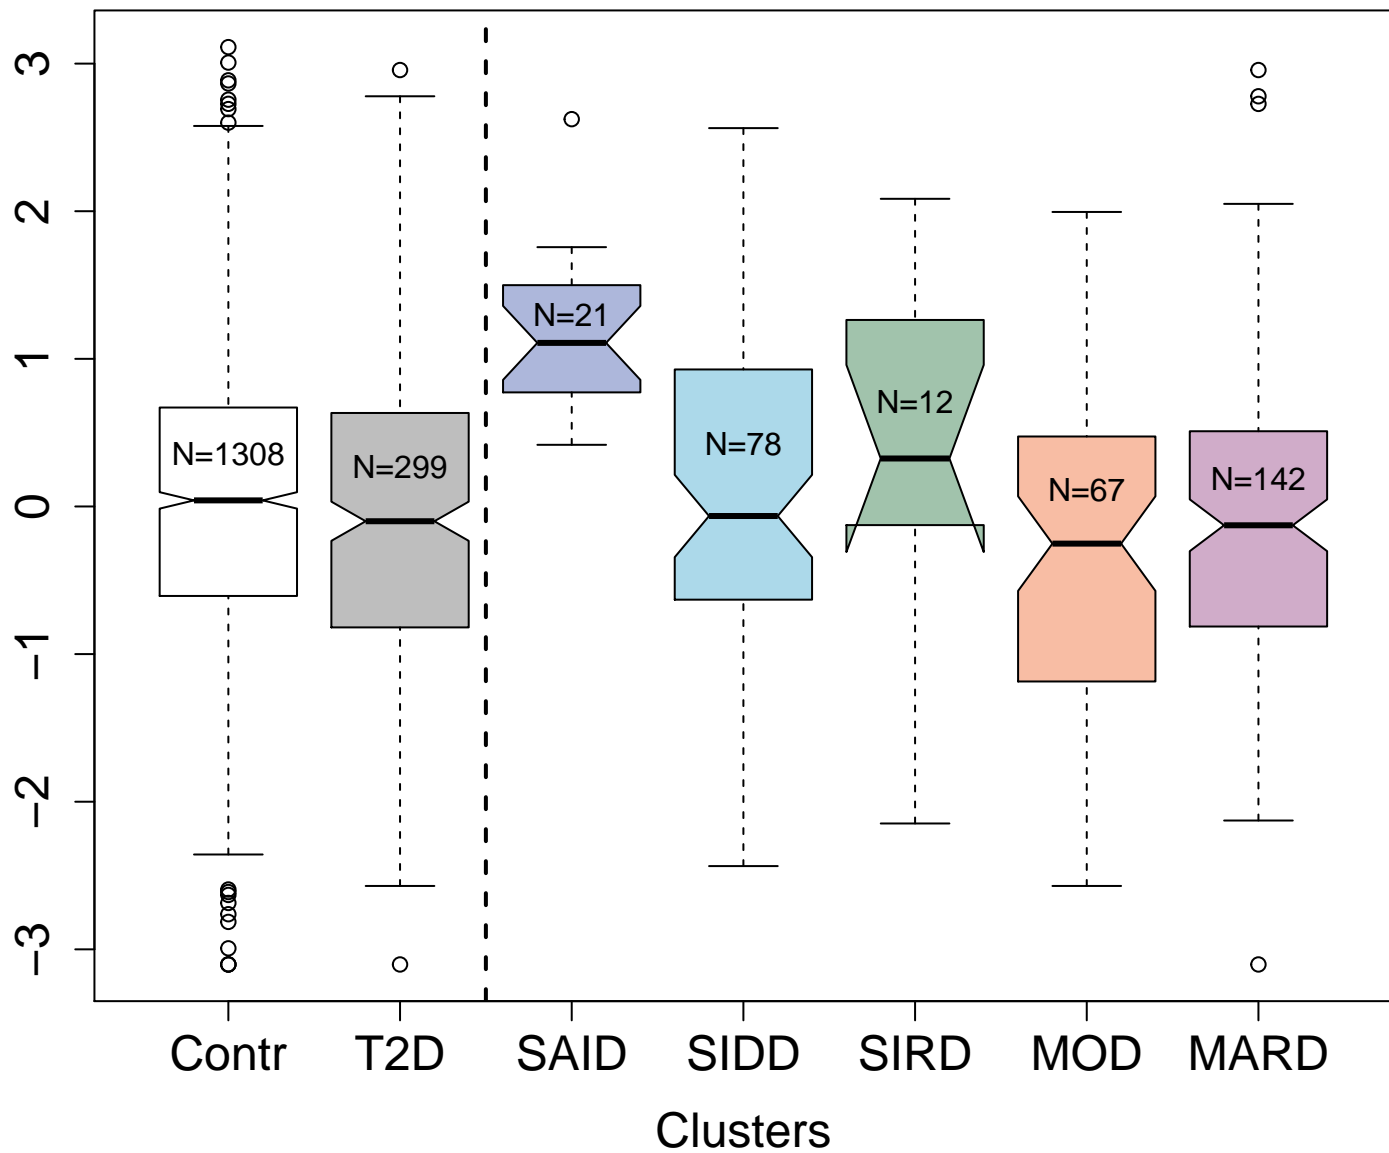

M47114 : ferulic acid 4--sulfate

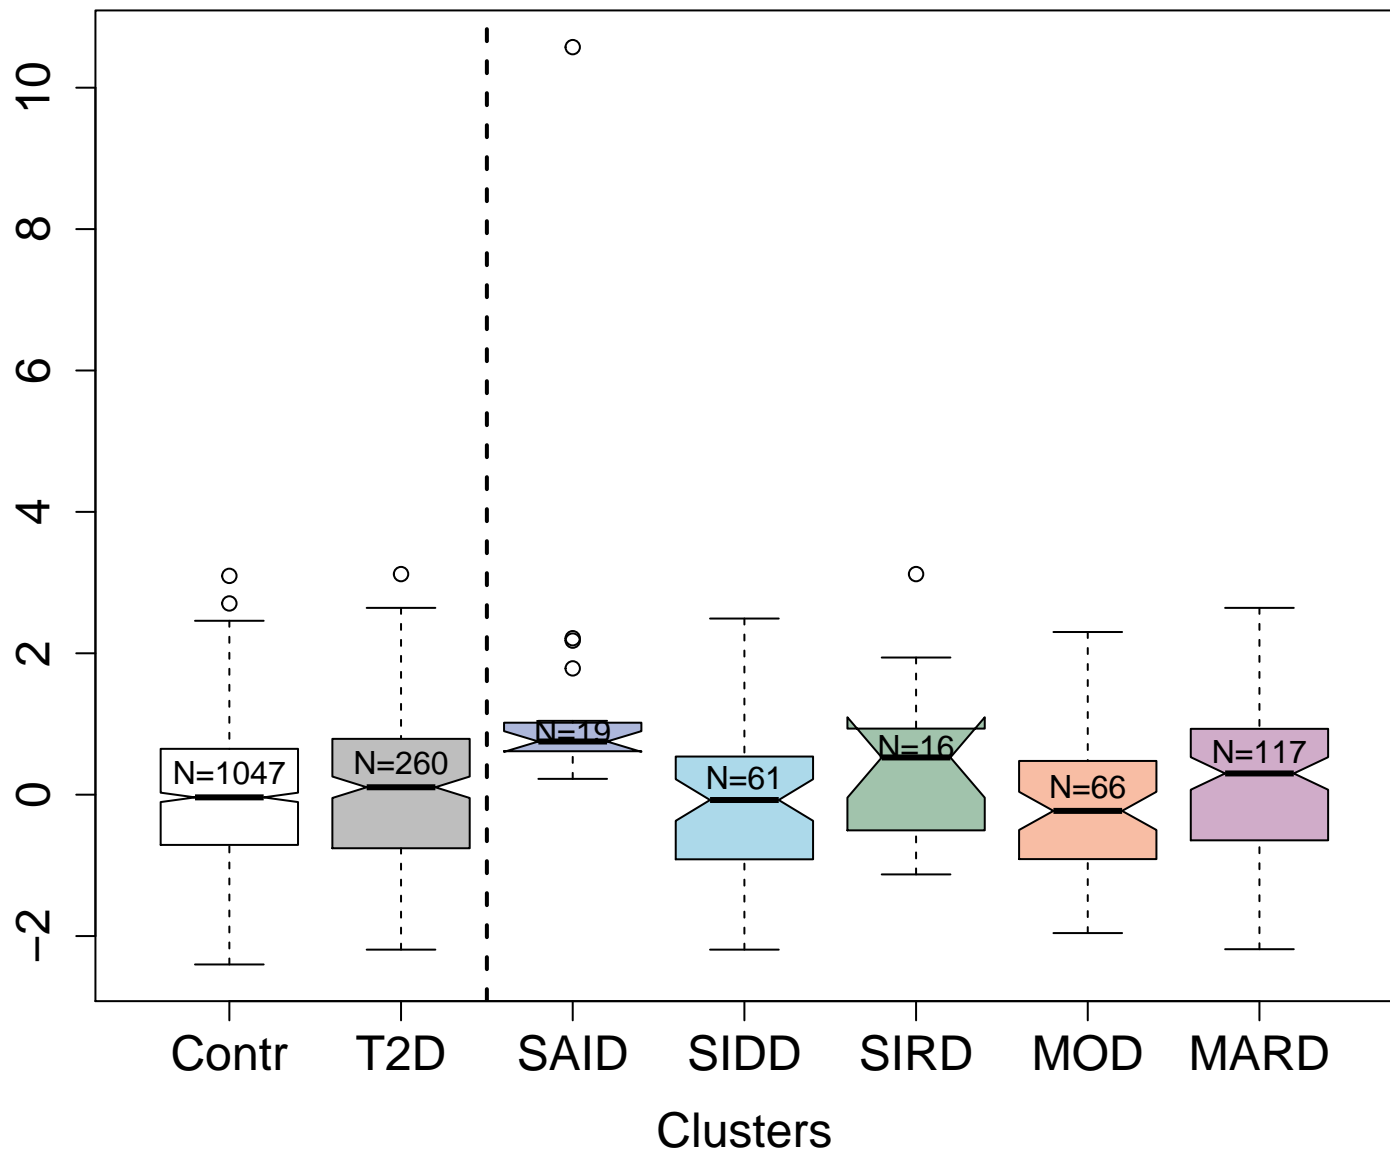

M47031 : 2-methoxyacetaminophen sulfate\*

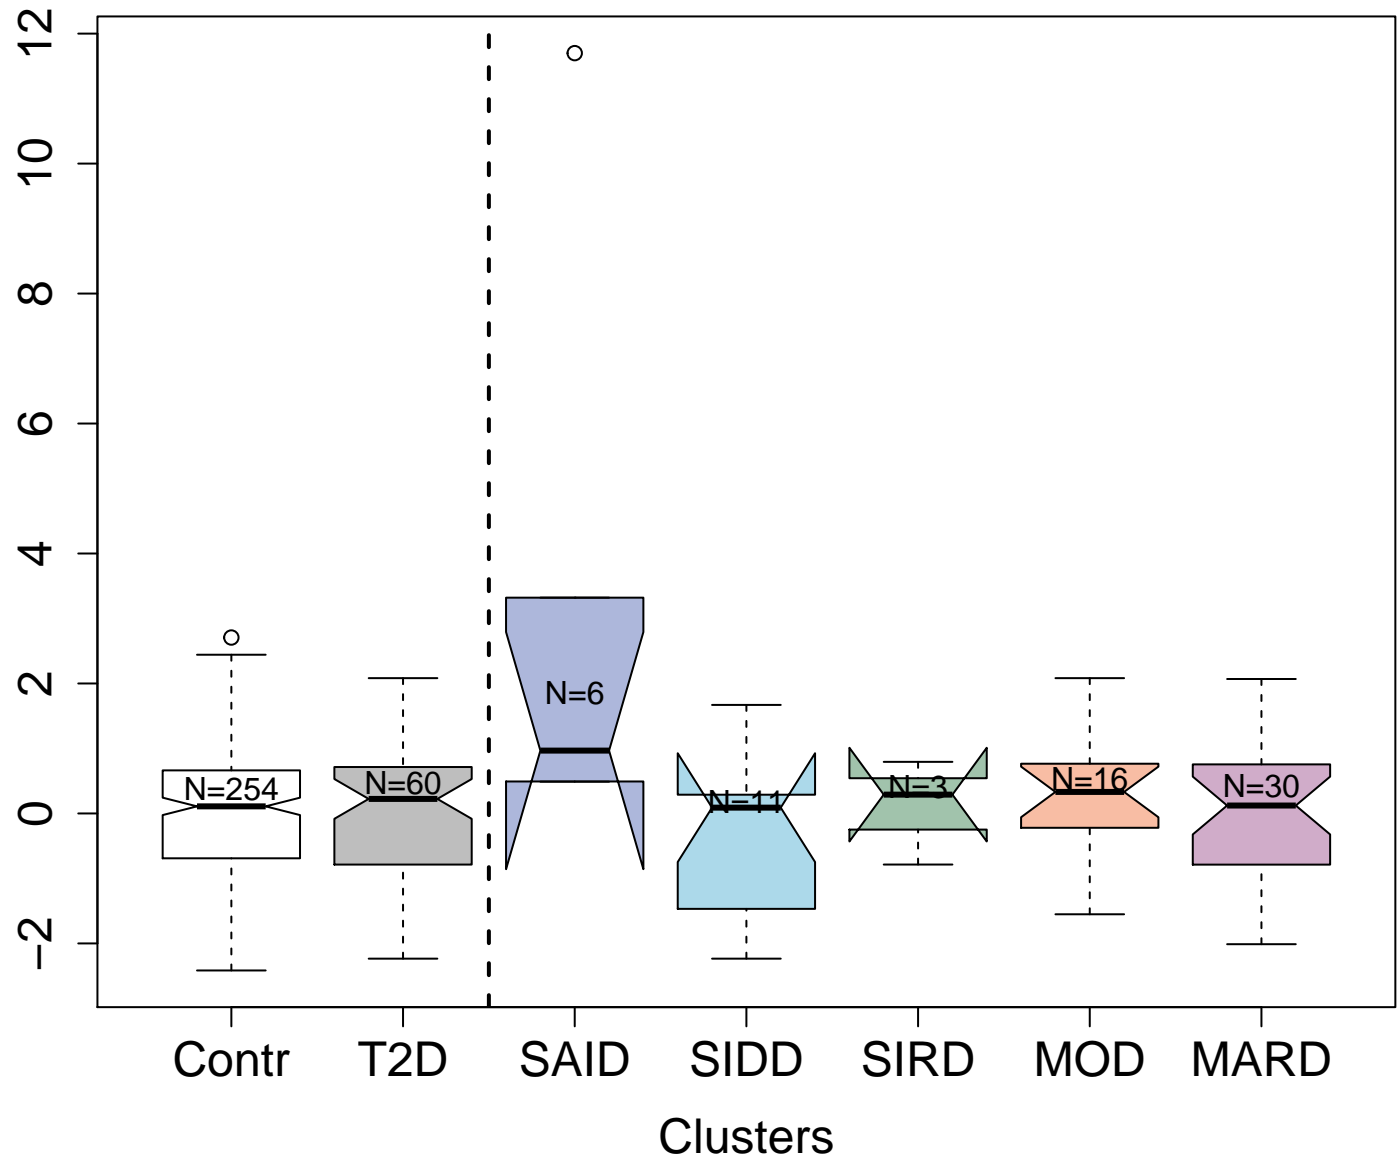

M1356 : nonadecanoate (19:0)

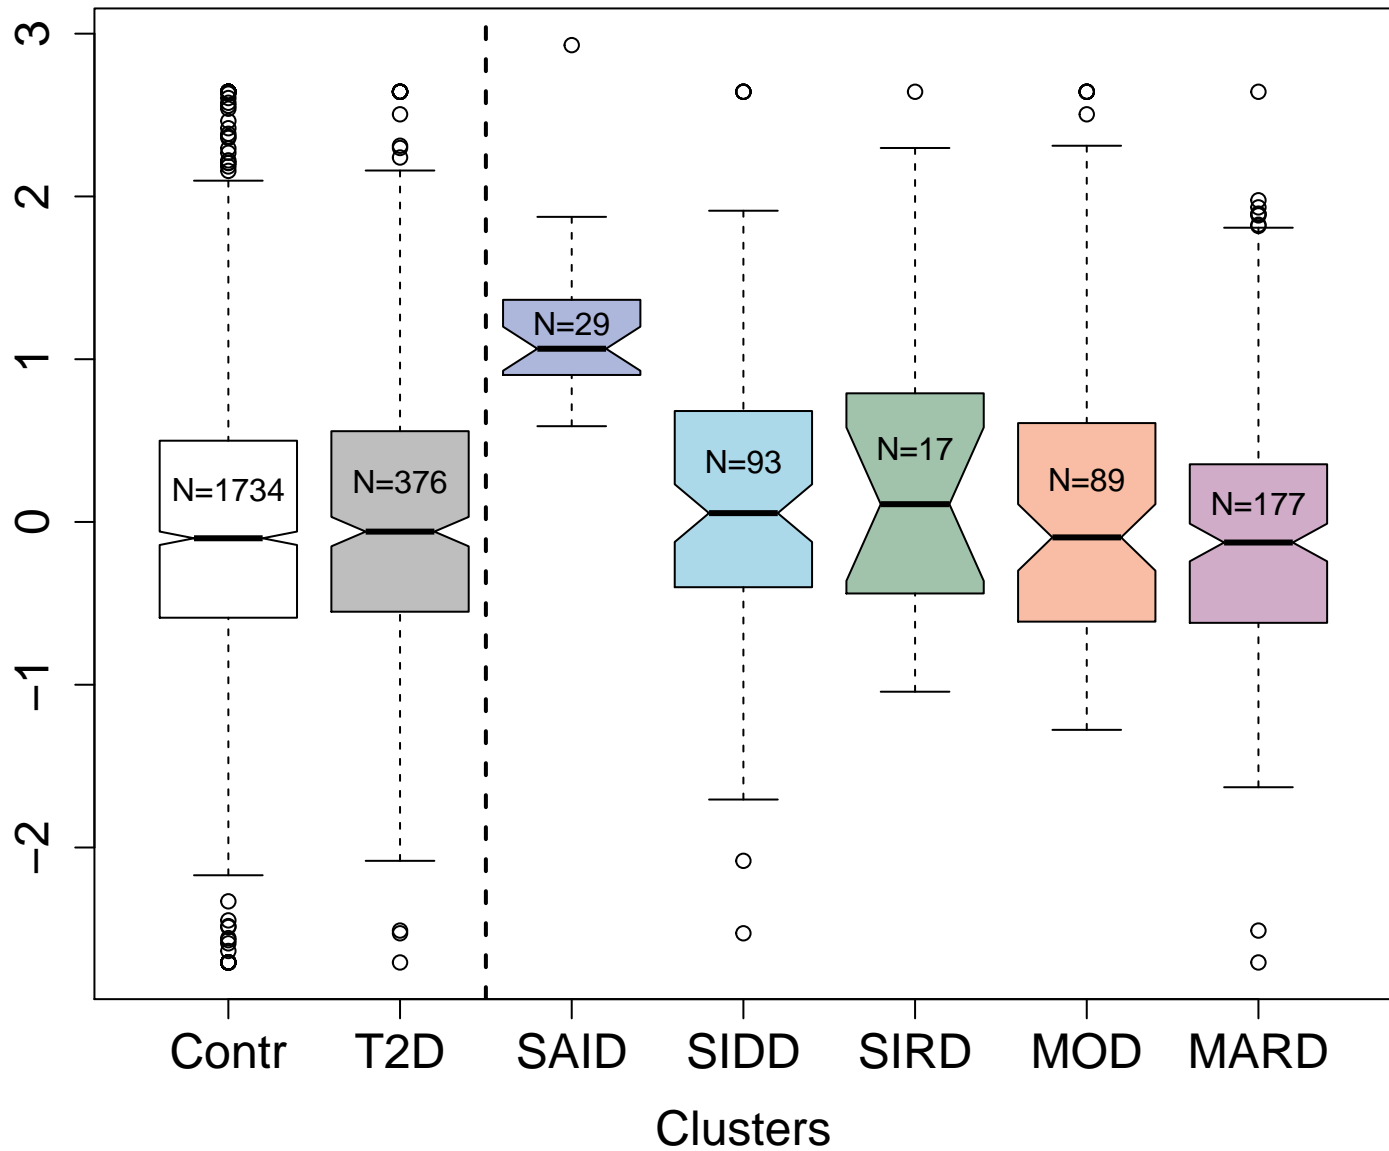

M41220 : 2-stearoyl-GPE (18:0)\*

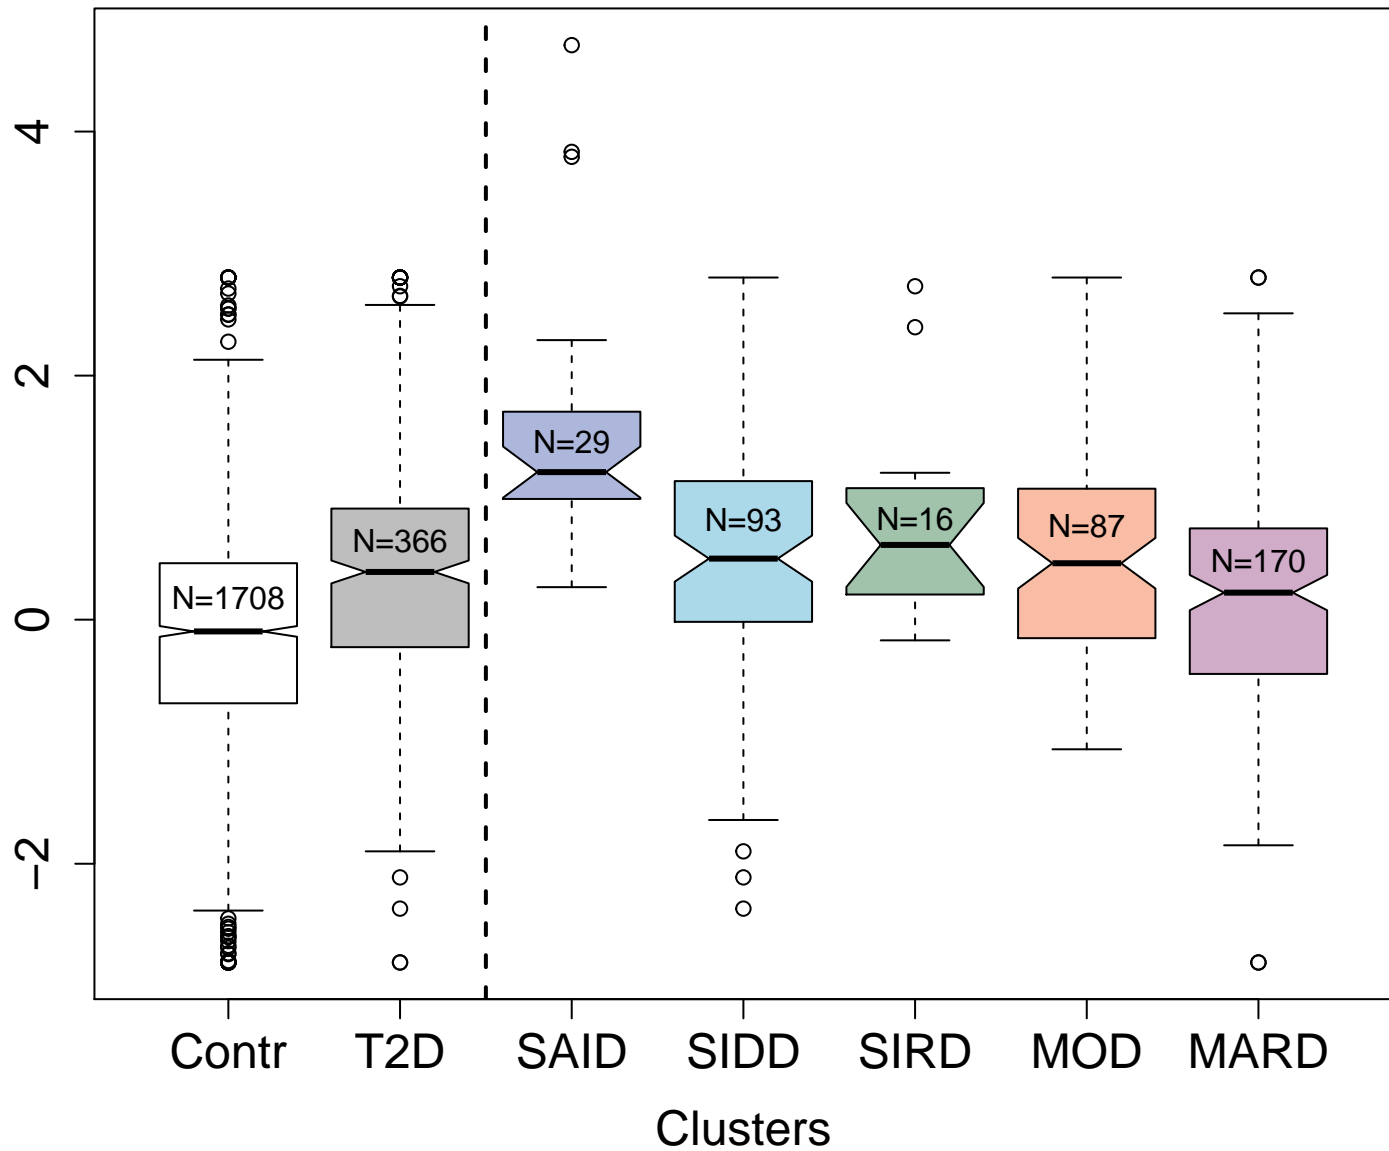

M42489 : 2-hydroxydecanoate

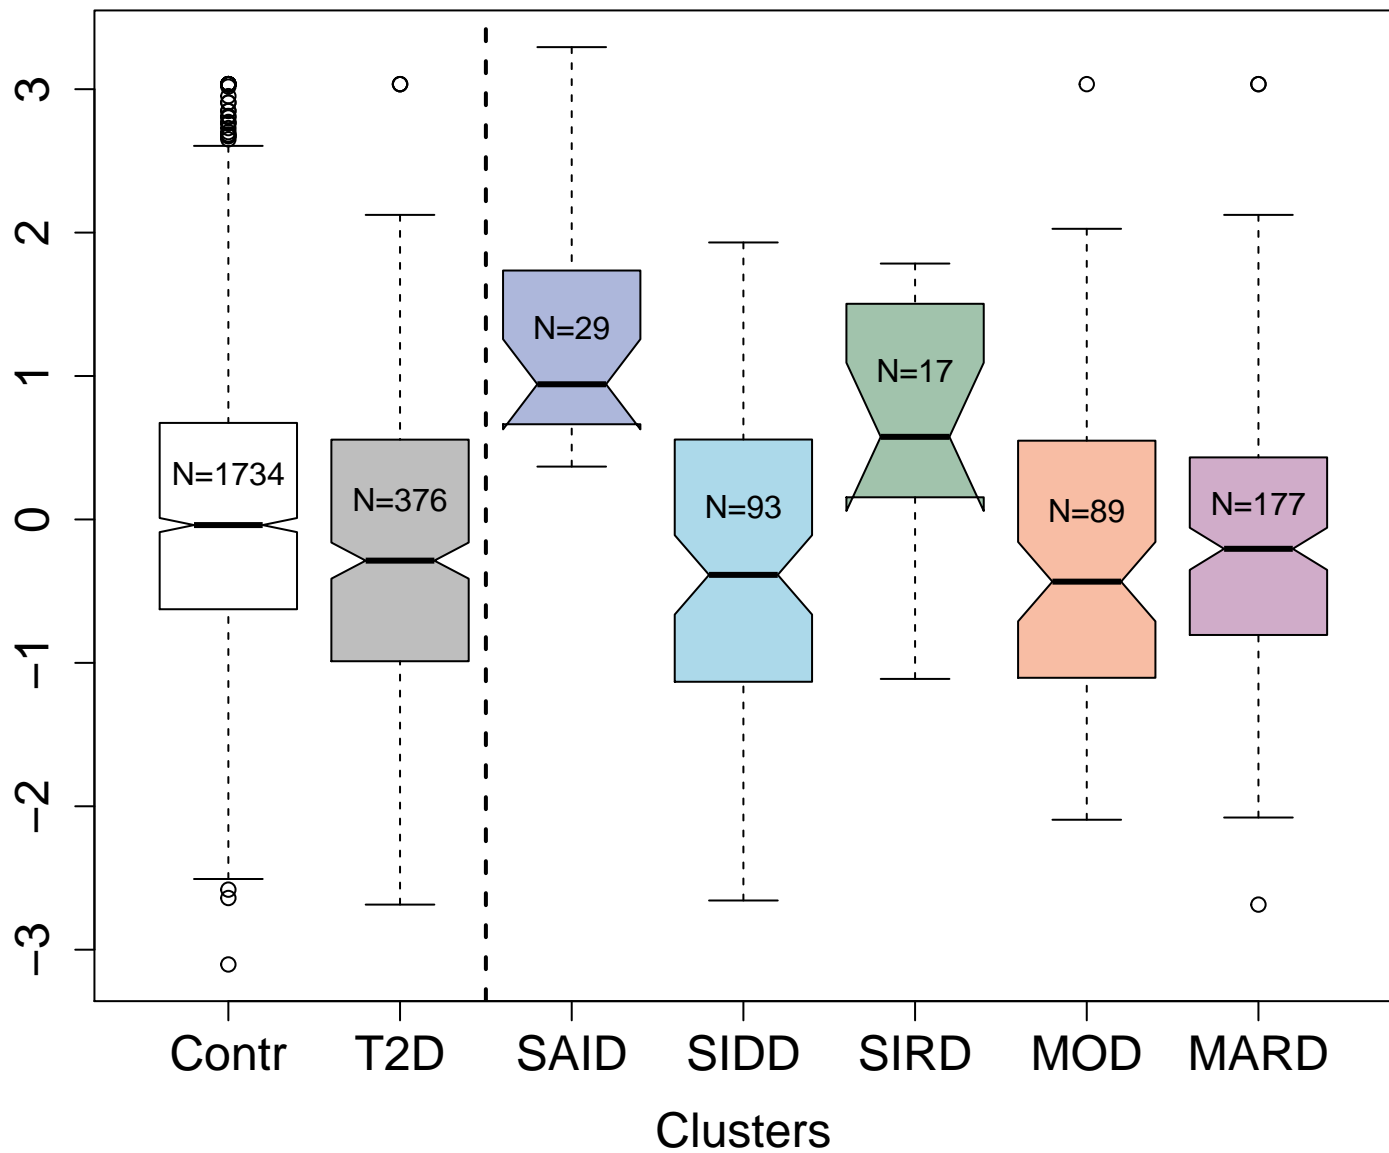

M1358 : stearate (18:0)

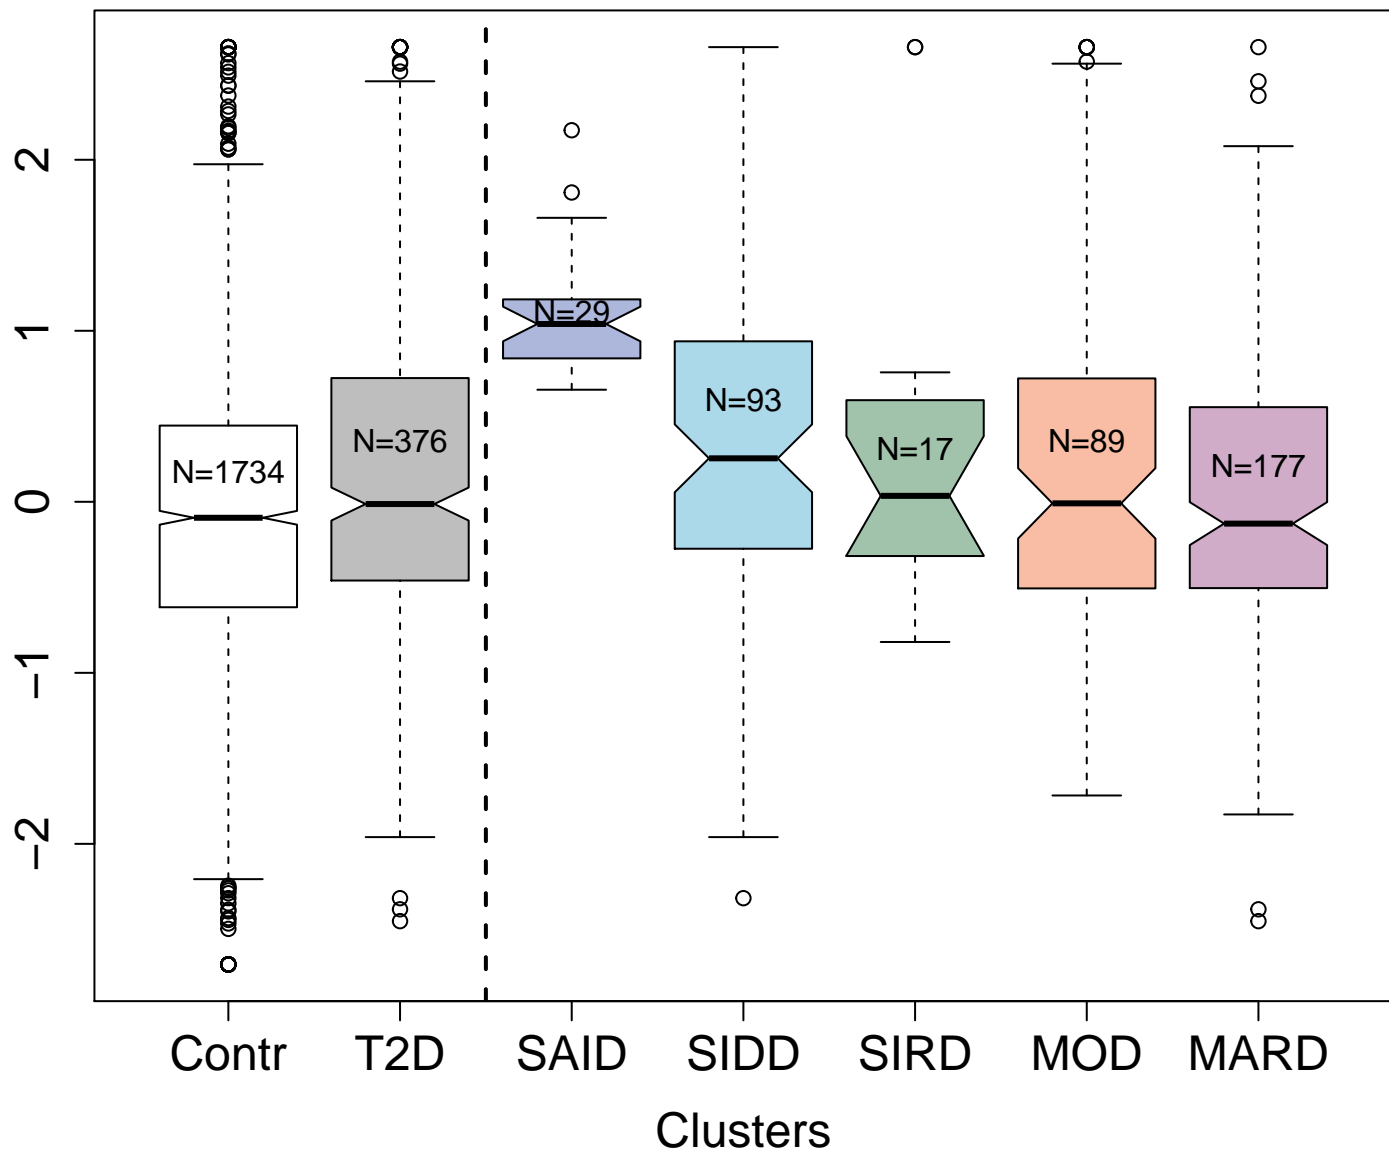

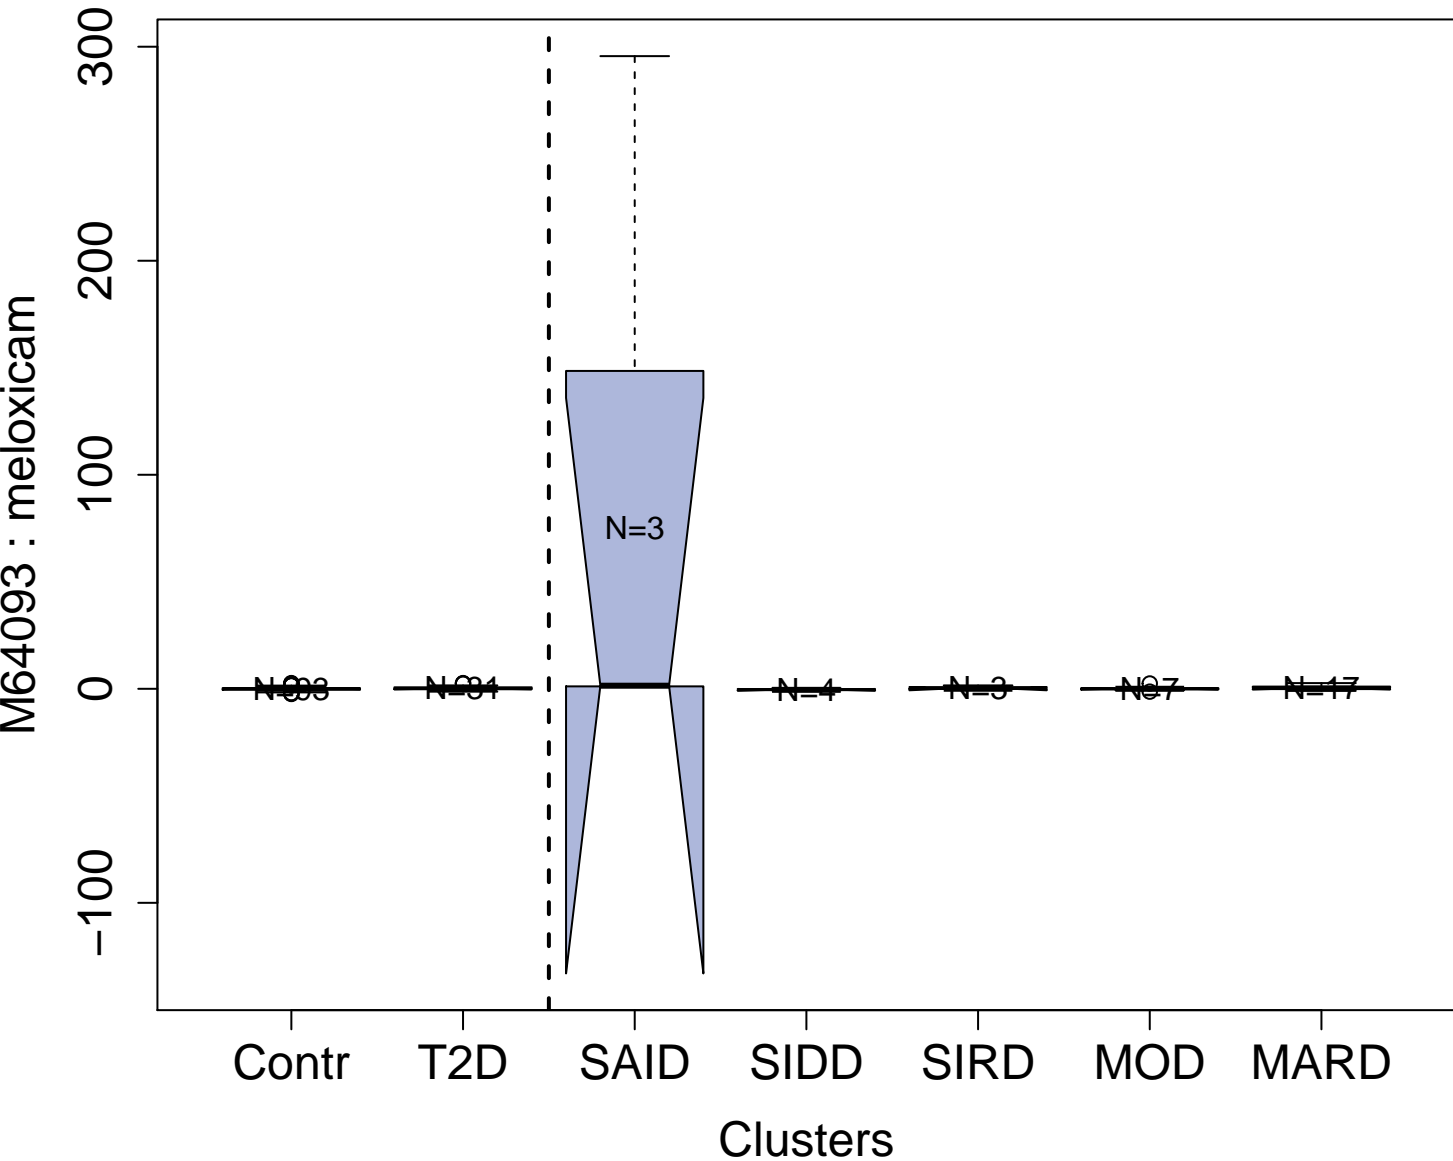



M42398 : 1-stearoyl-GPE (18:0)

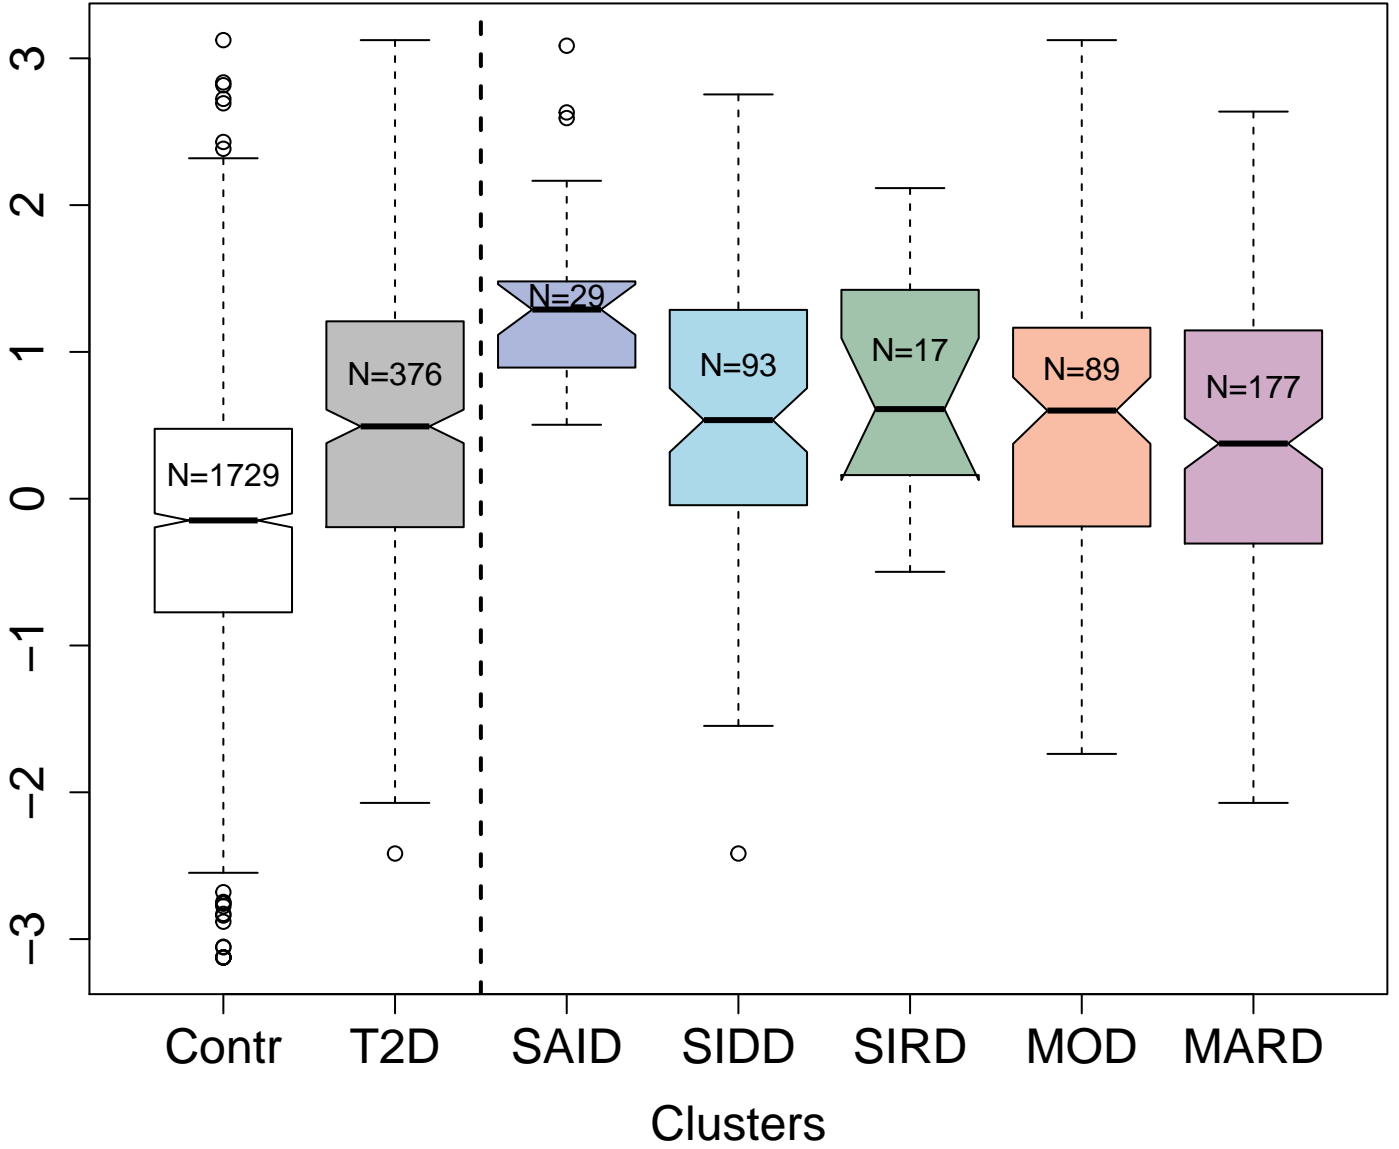

M17769 : sphinganine

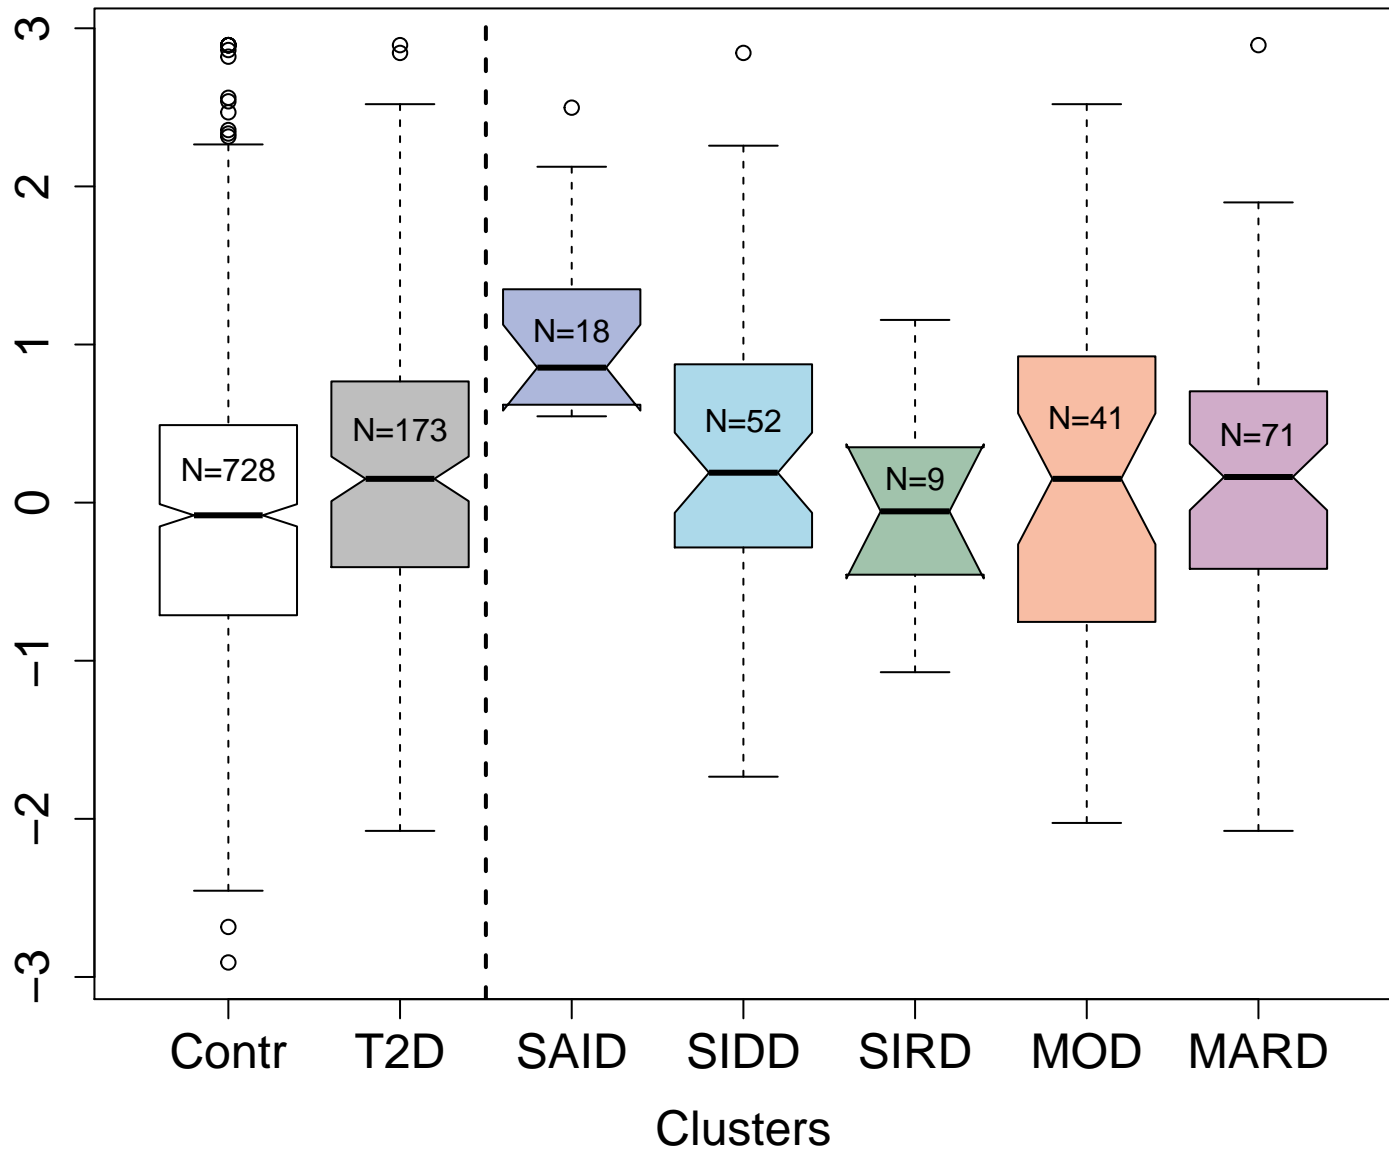

M21127 : 1-palmitoylglycerol (16:0)

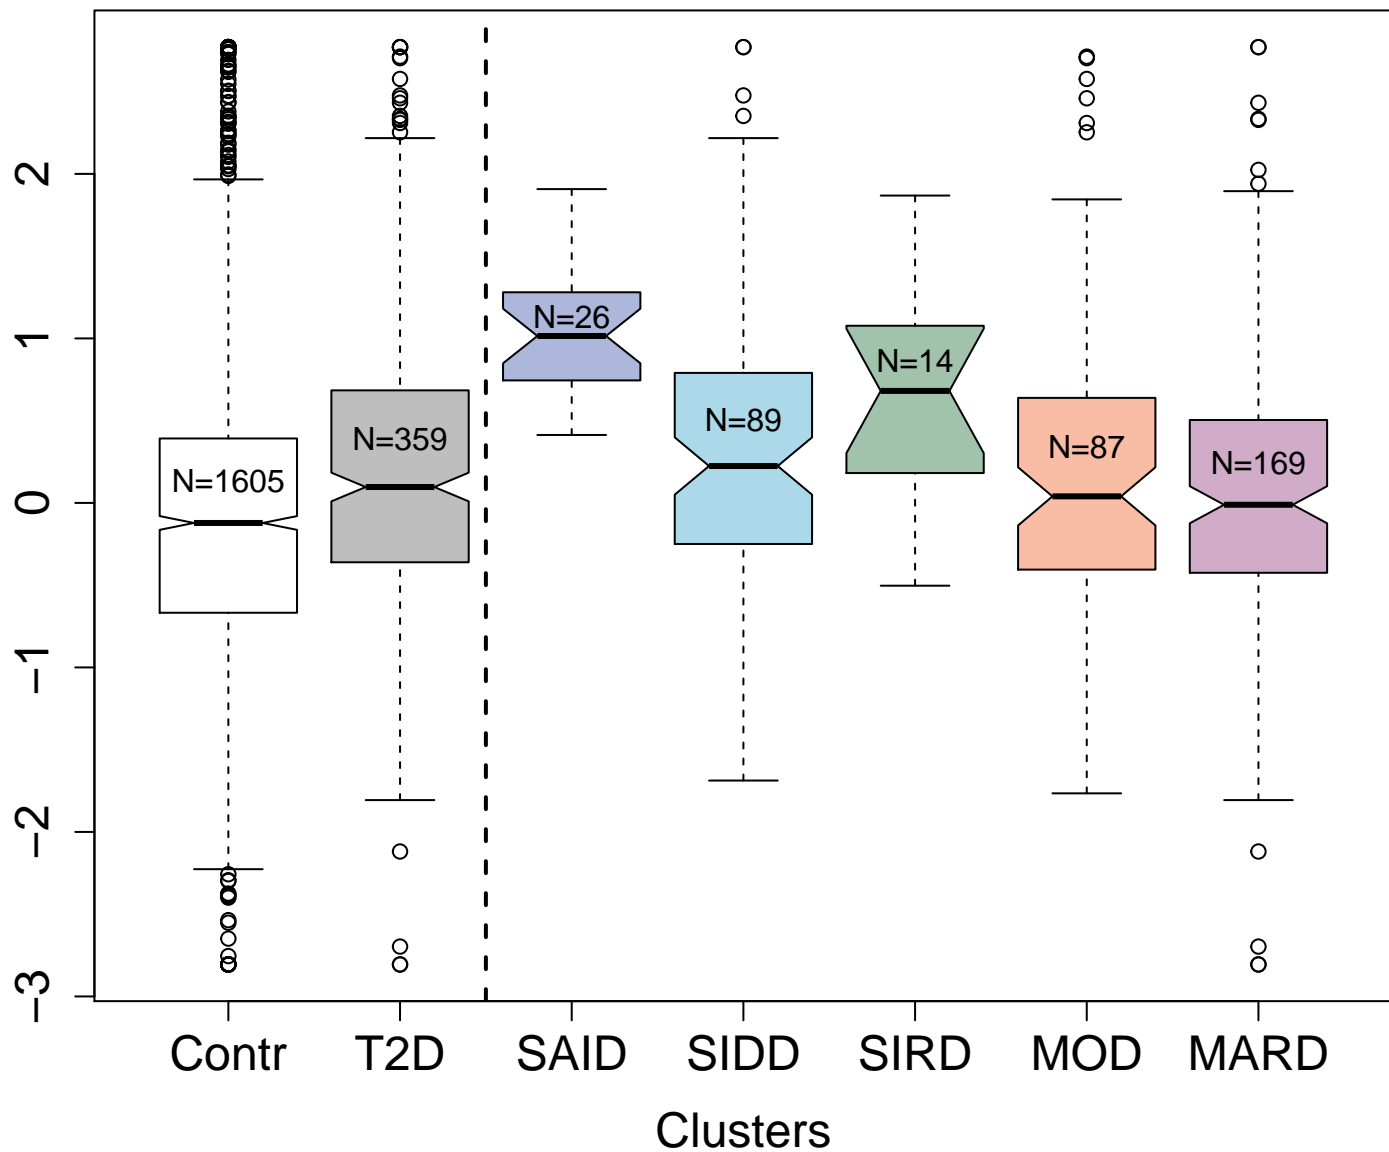

M33228 : 1-arachidonoyl-GPC (20:4n6)\*

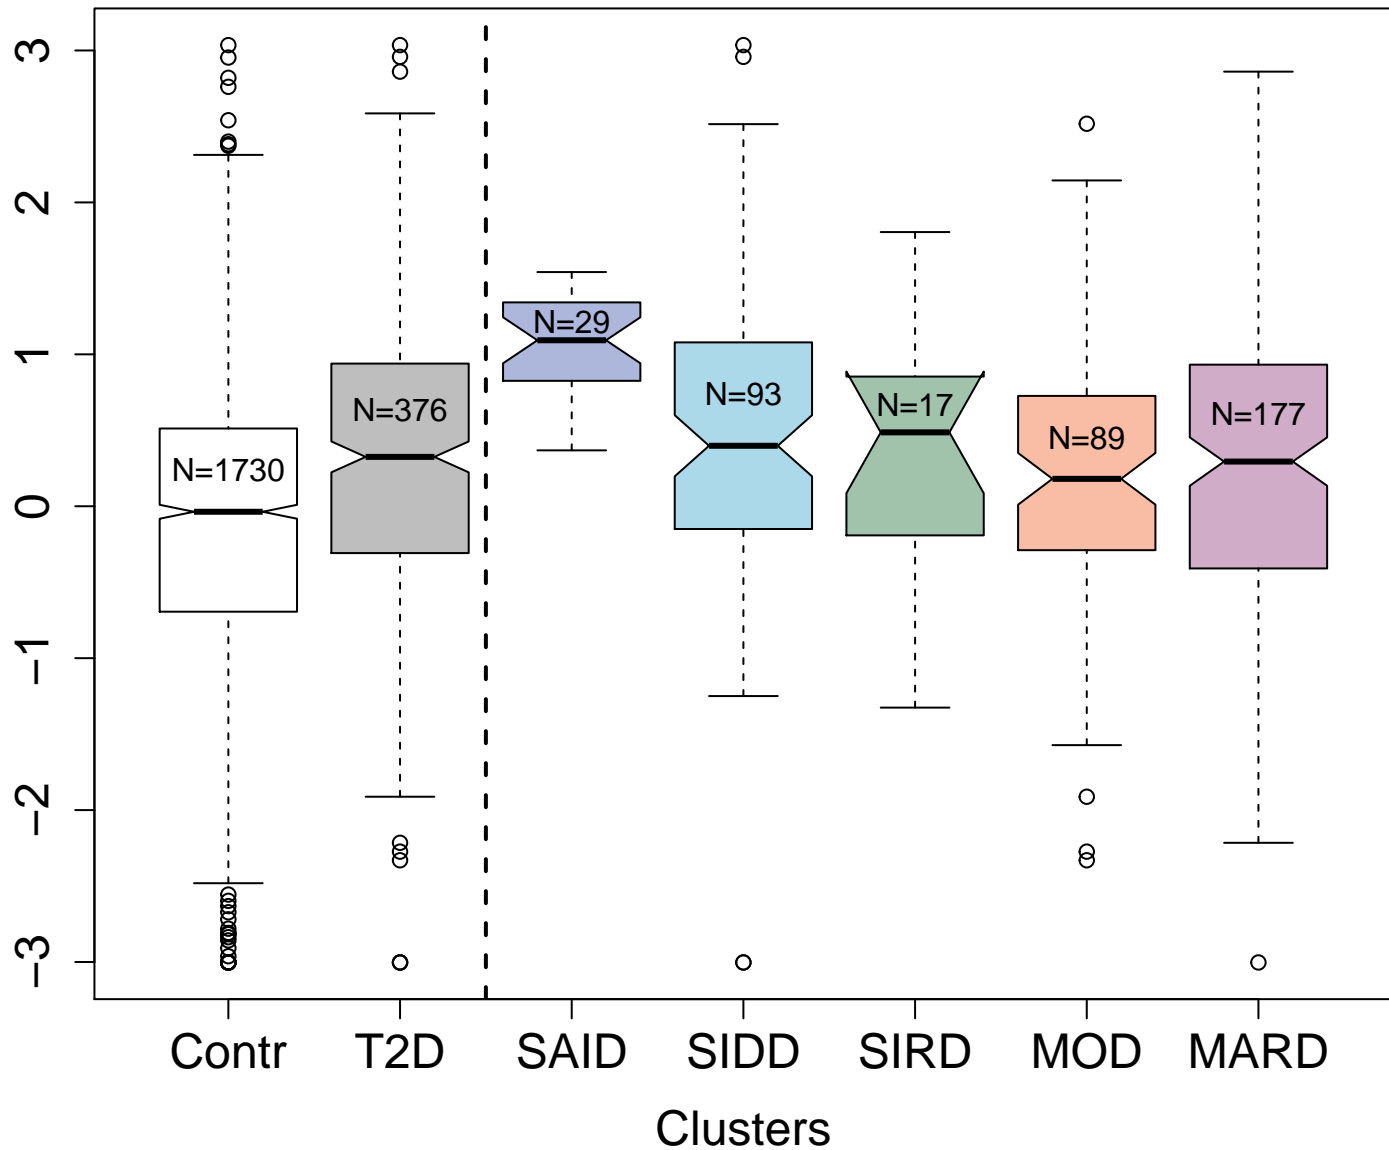

M62860 : N6-methyllysine

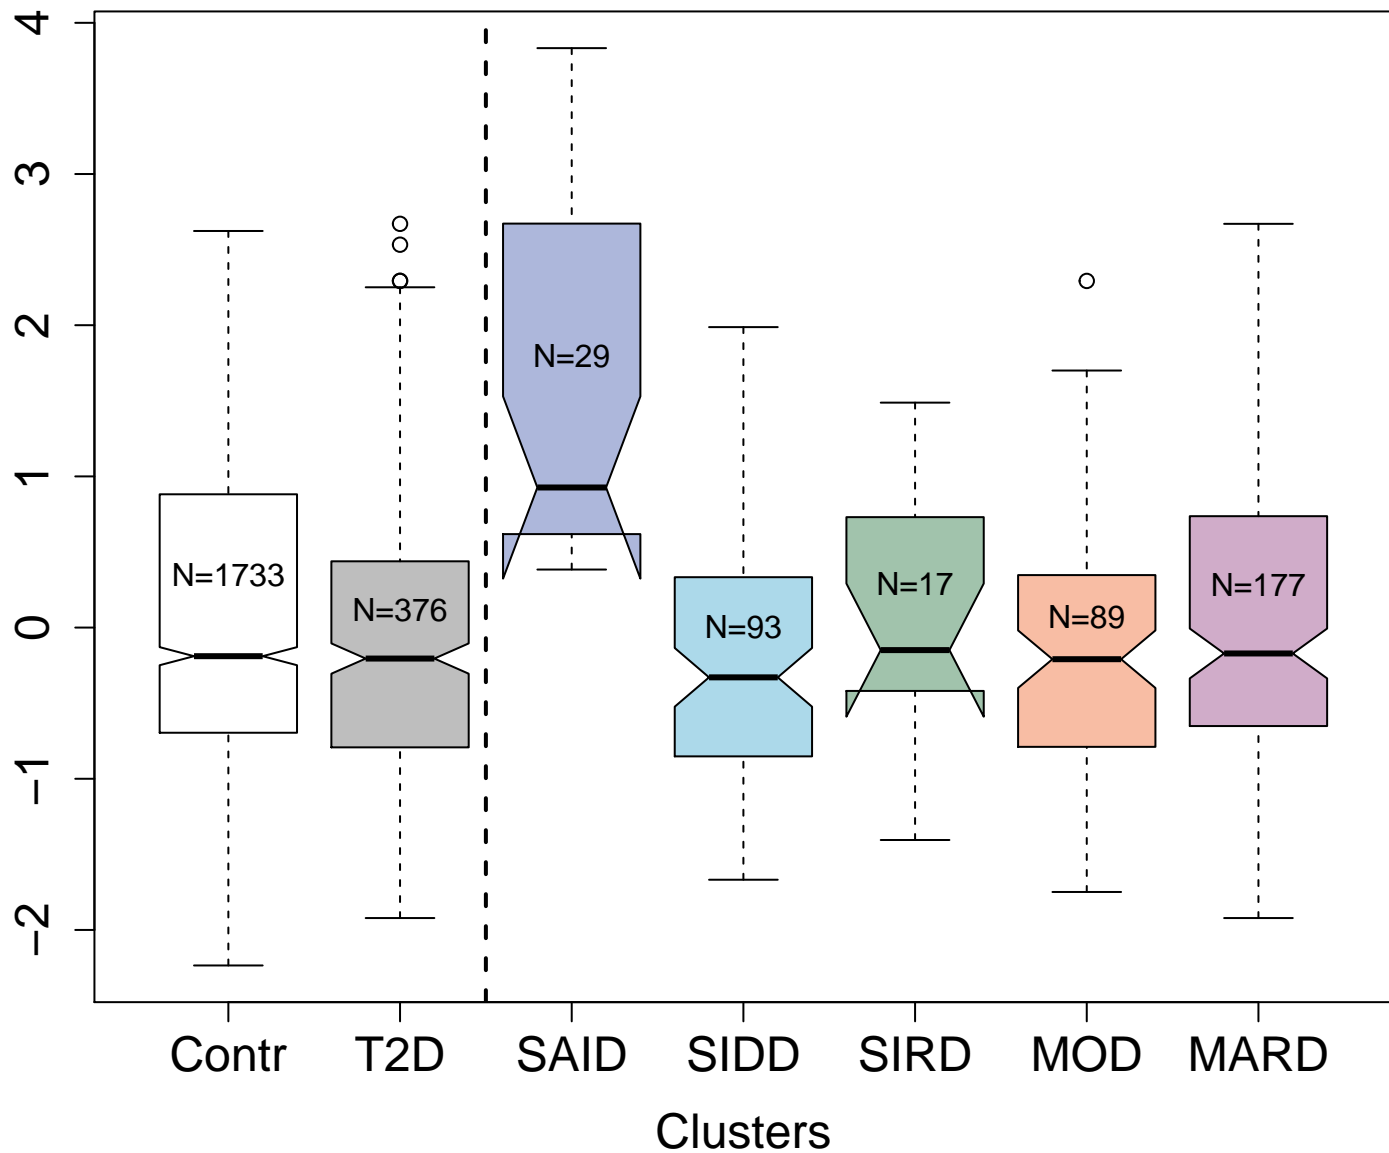

M34407 : isovalerylcarnitine (C5)

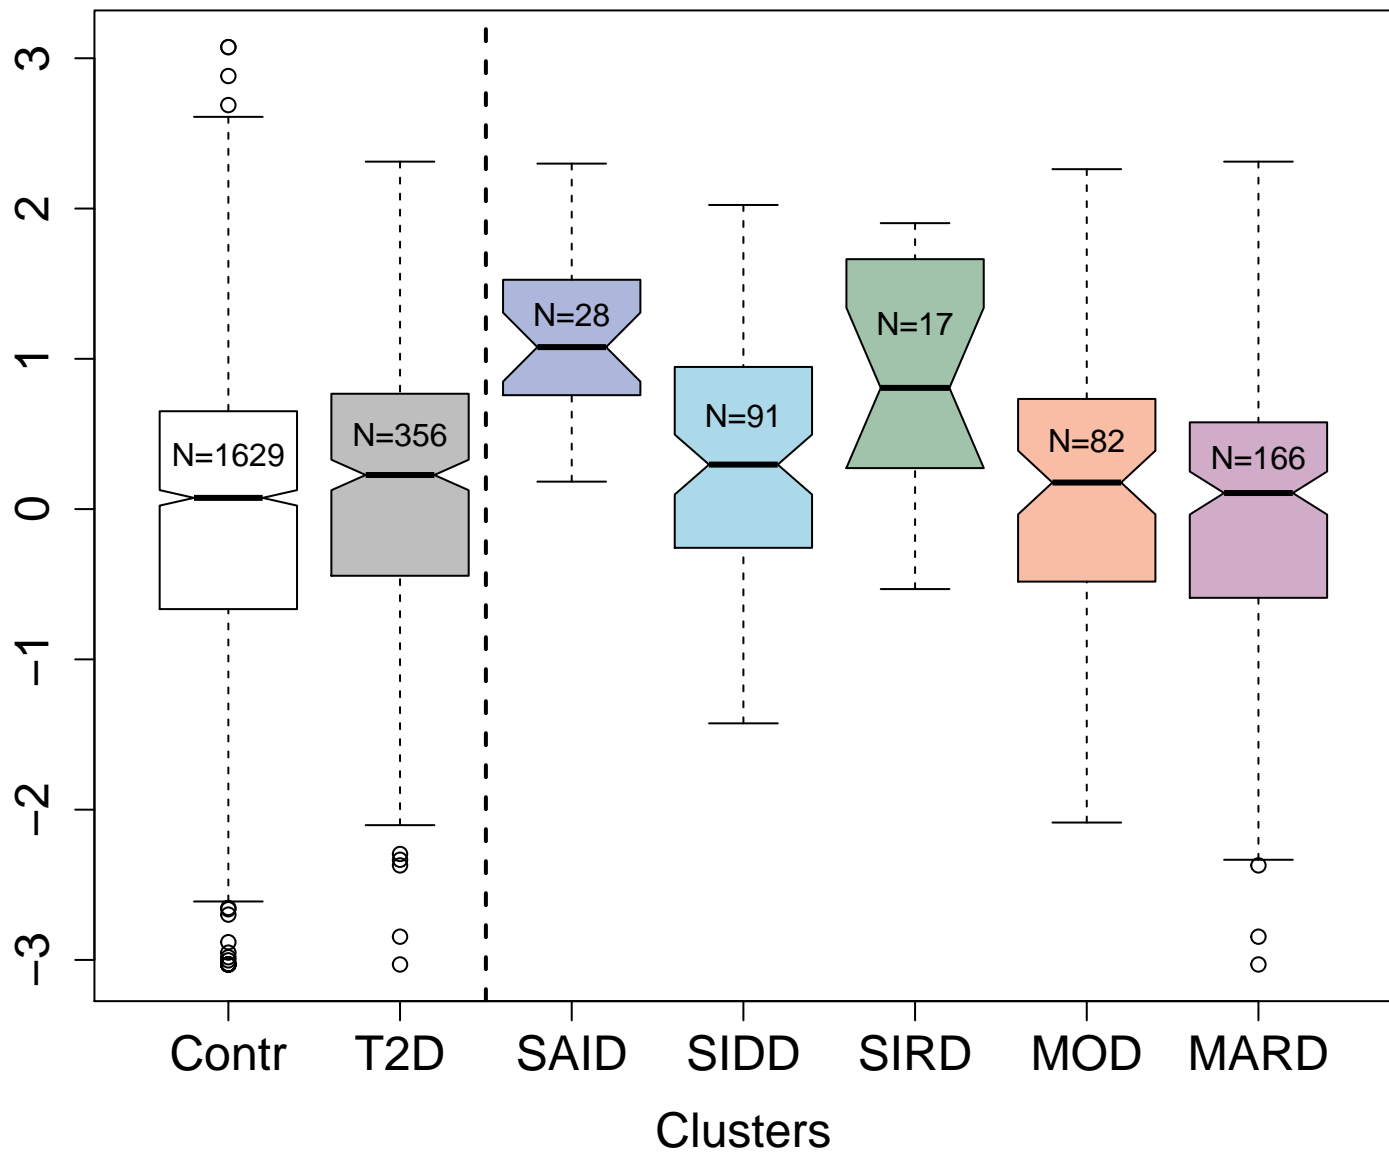

M35628 : 1-oleoyl-GPE (18:1)

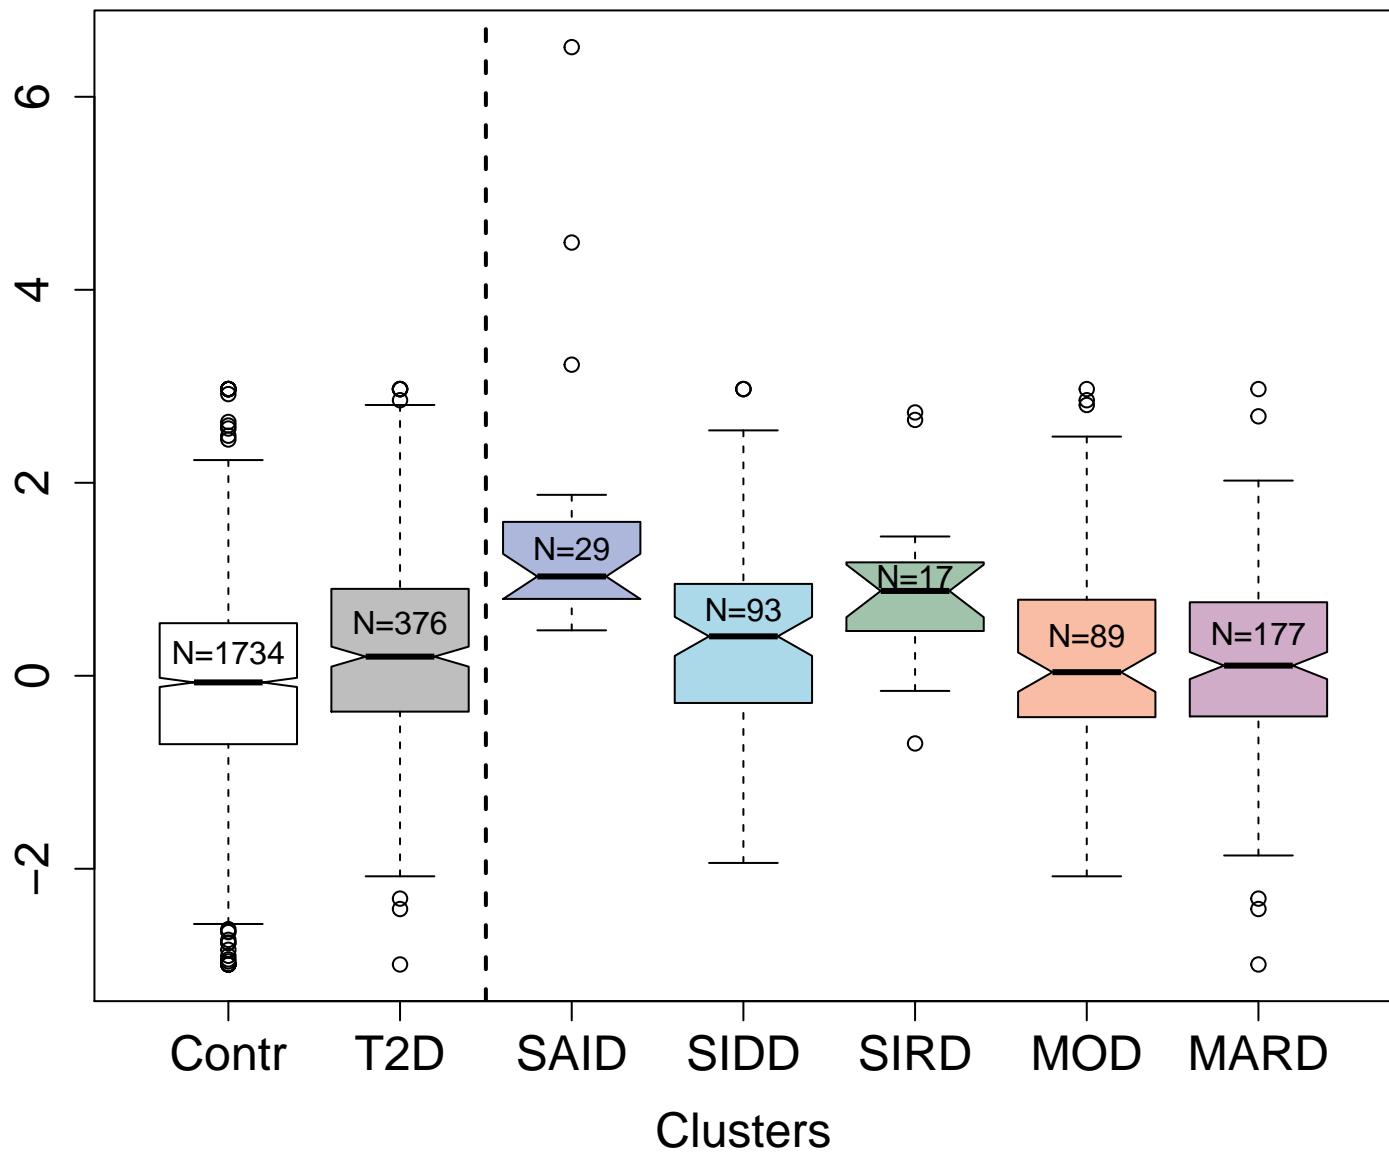

M52470 : 1-palmitoyl-2-palmitoleyl-GPC (16:0/16:1)\*

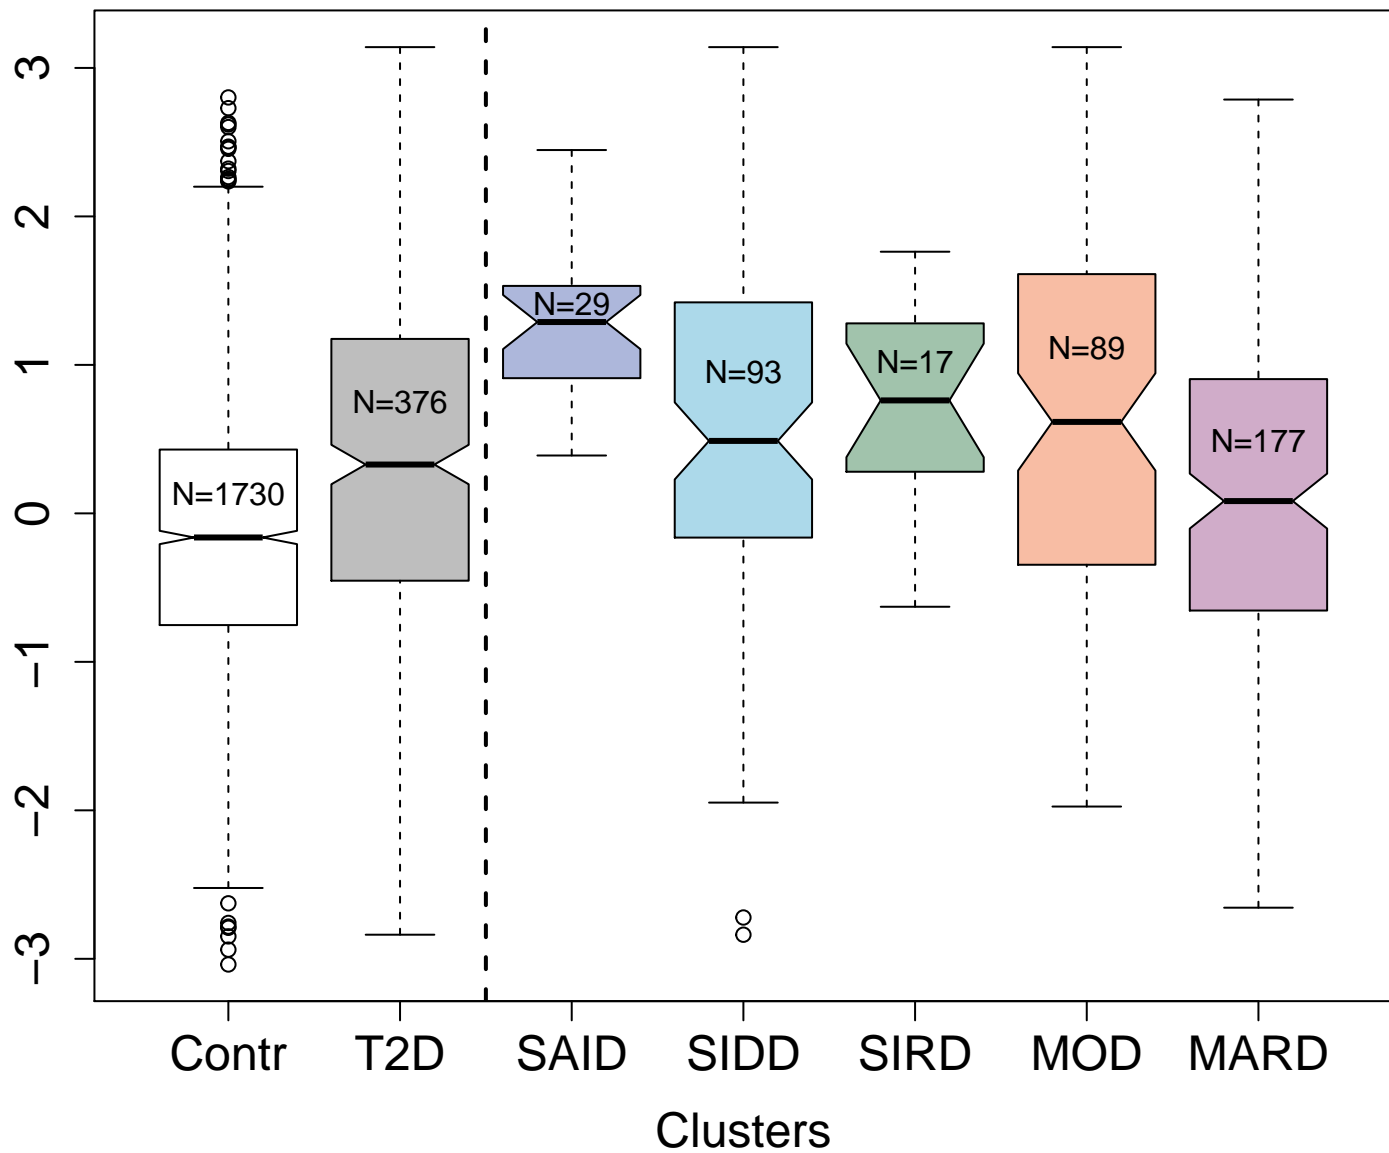



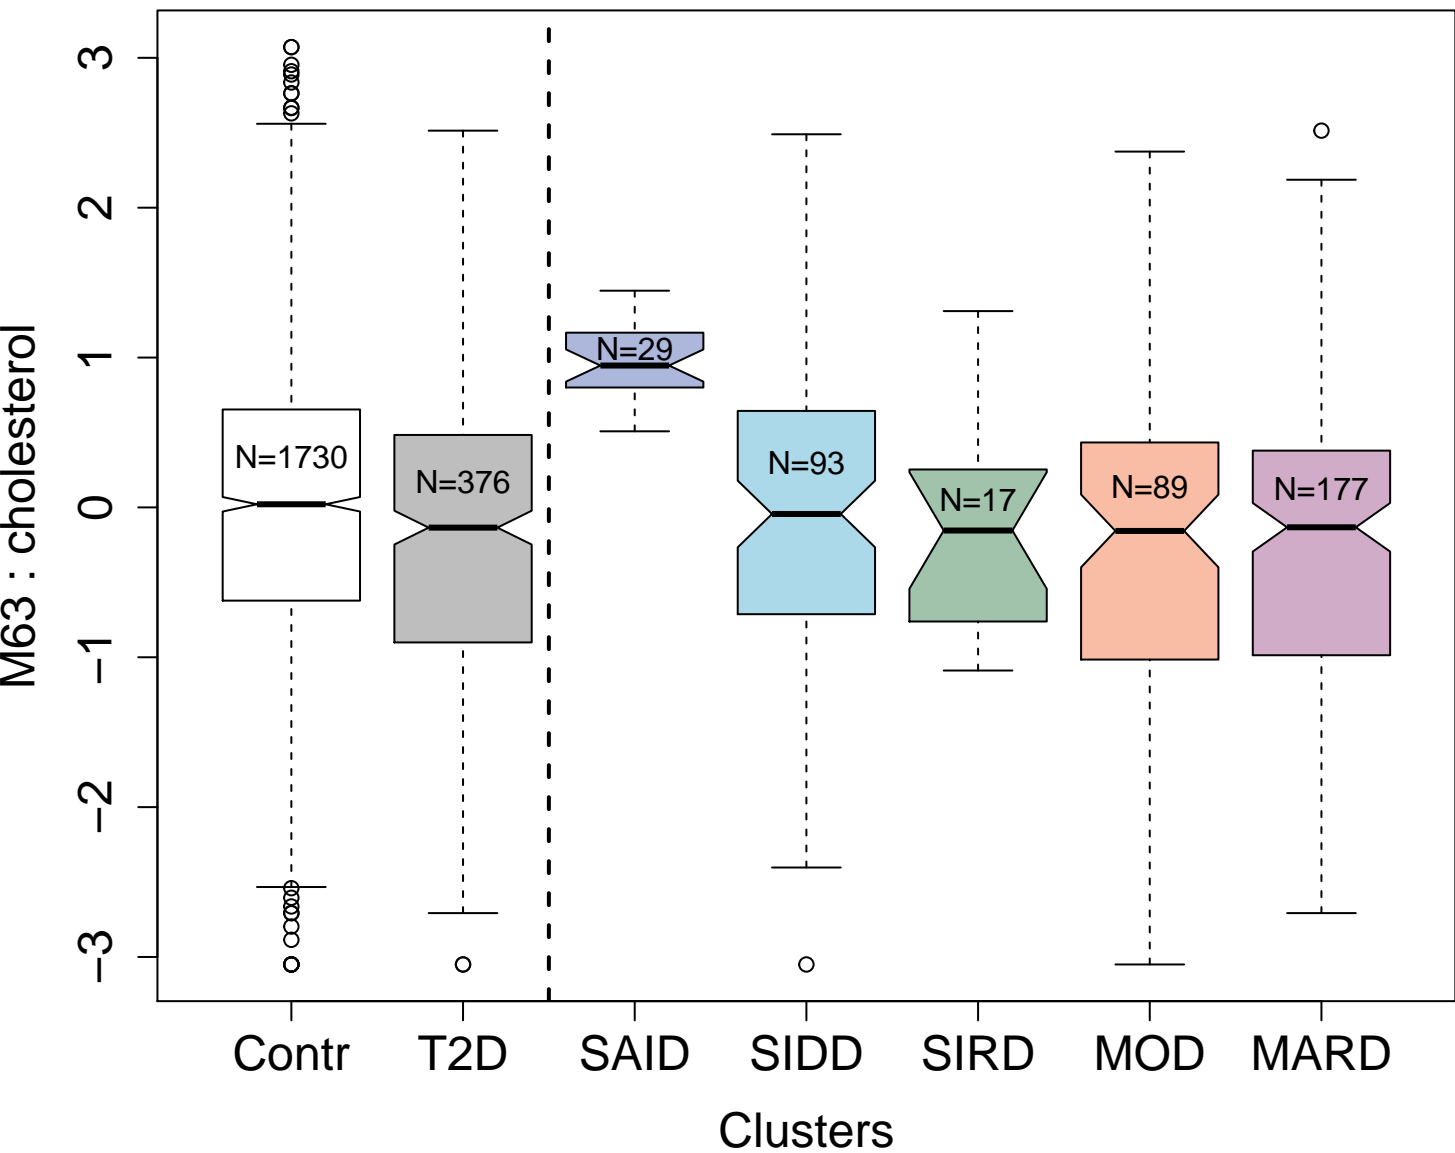

M48757 : N-acetylkynurenine (2)

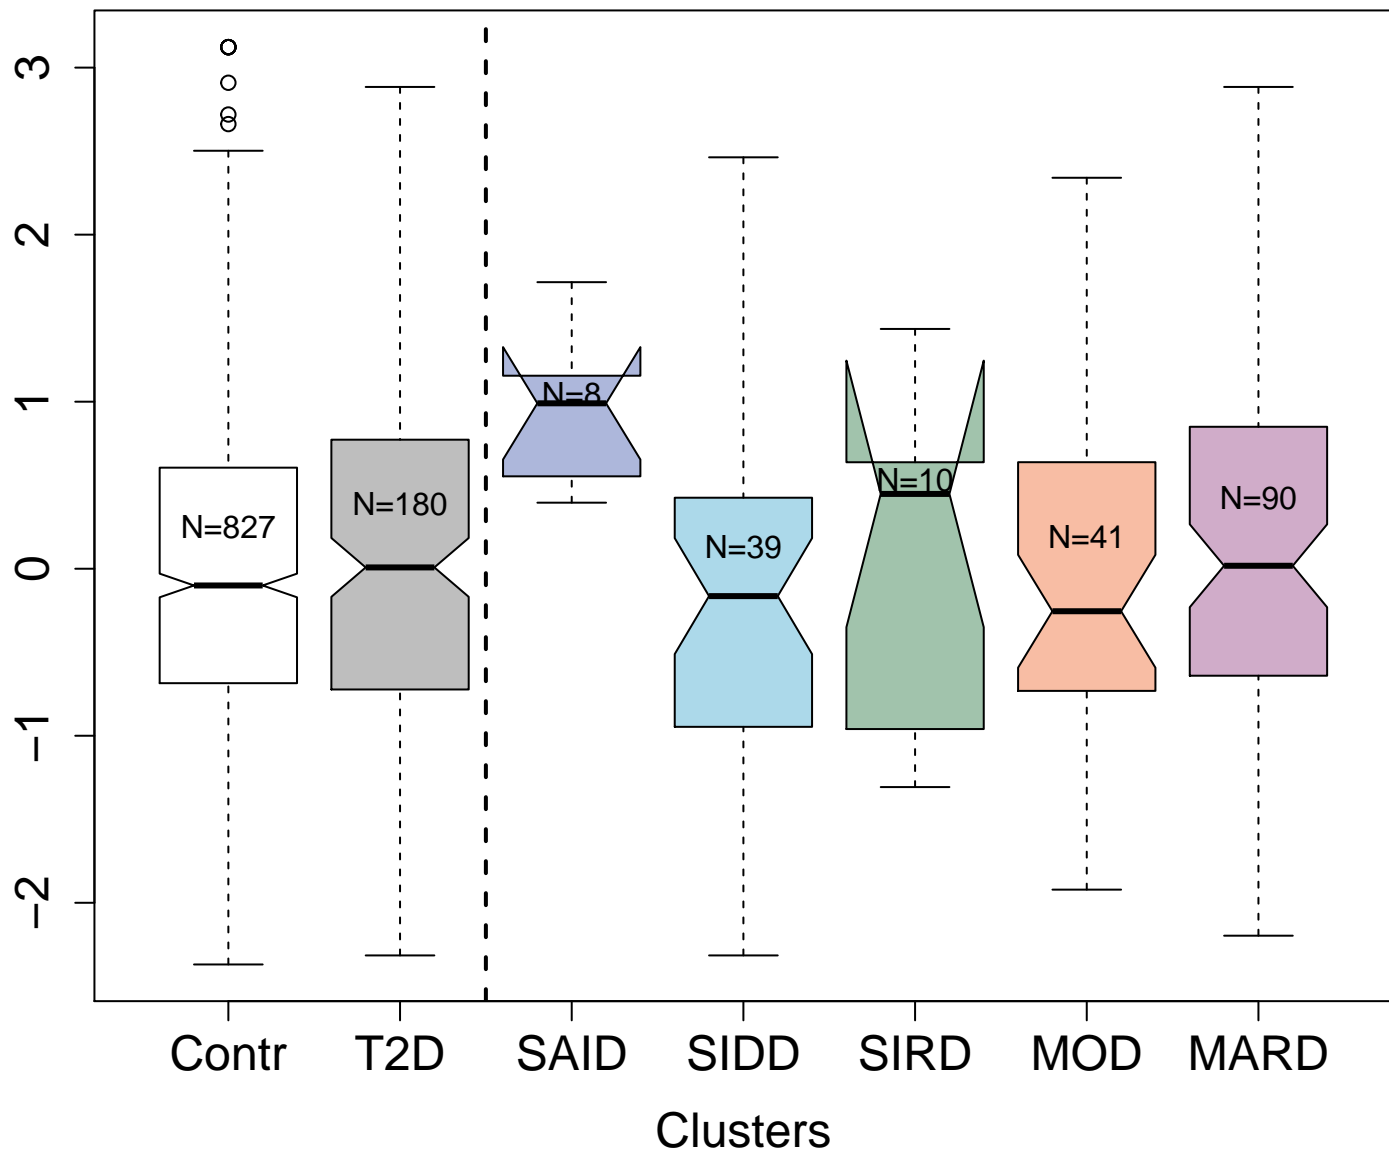

M52495 : sphingomyelin (d18:1/21:0, d17:1/22:0, d16:1/23:0)

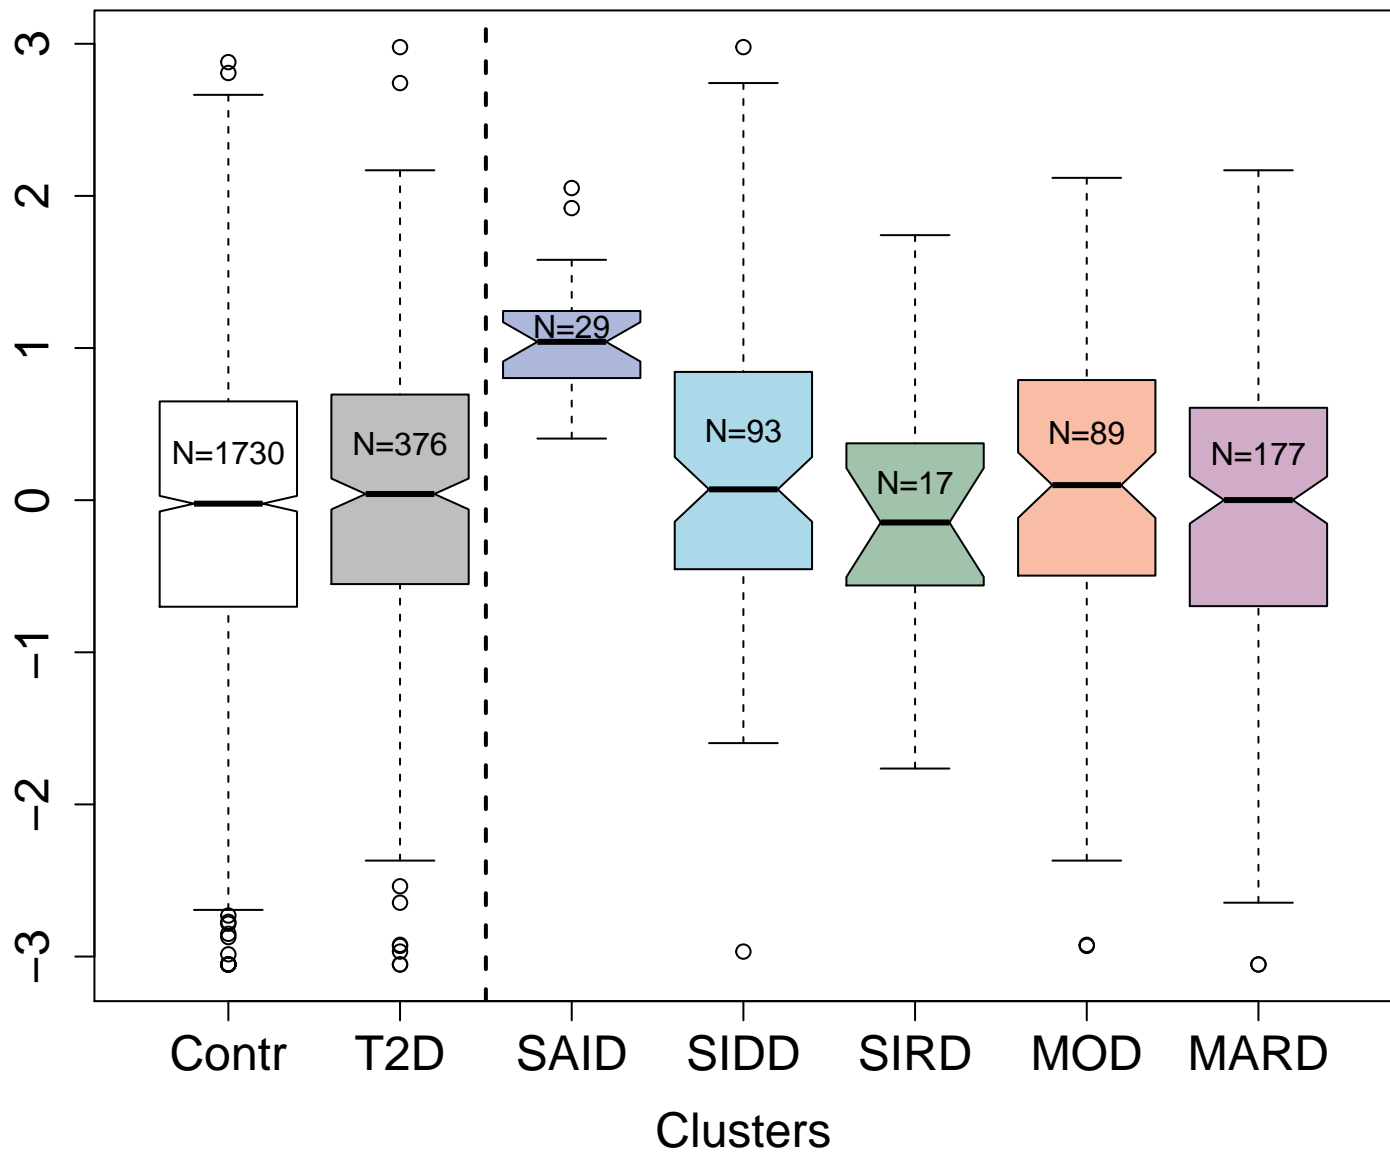

M52865 : X - 24544

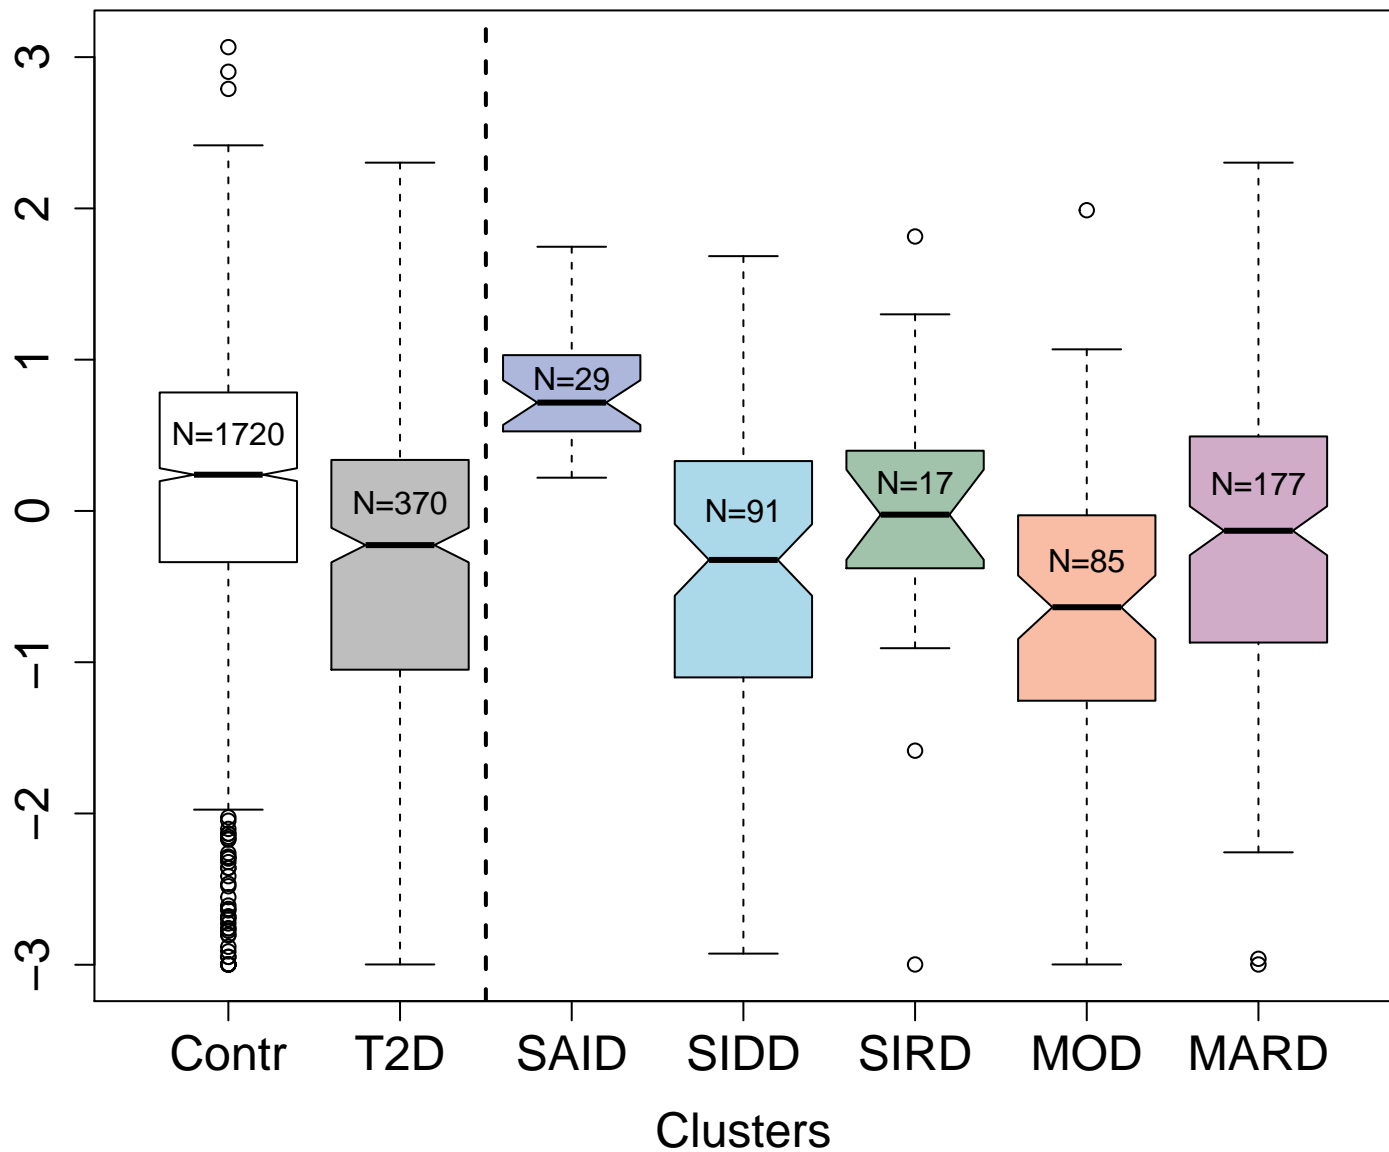

M63681 : 3-bromo-5-chloro-2,6-dihydroxybenzoic acid\*

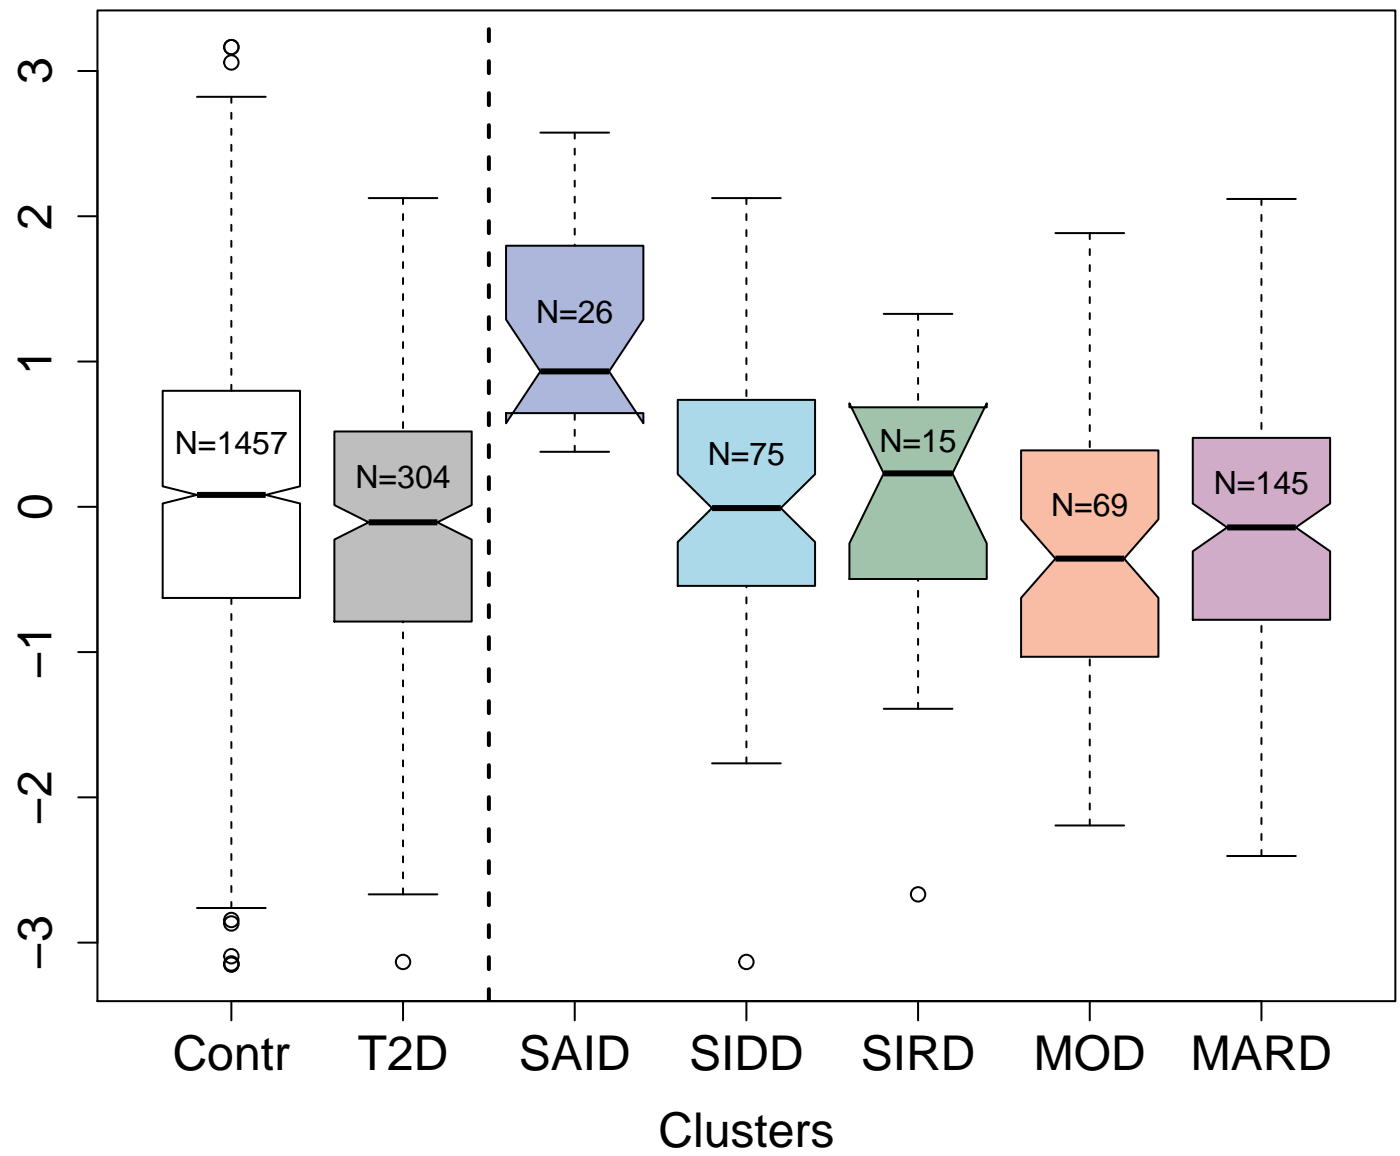

M53254 : caffeic acid sulfate

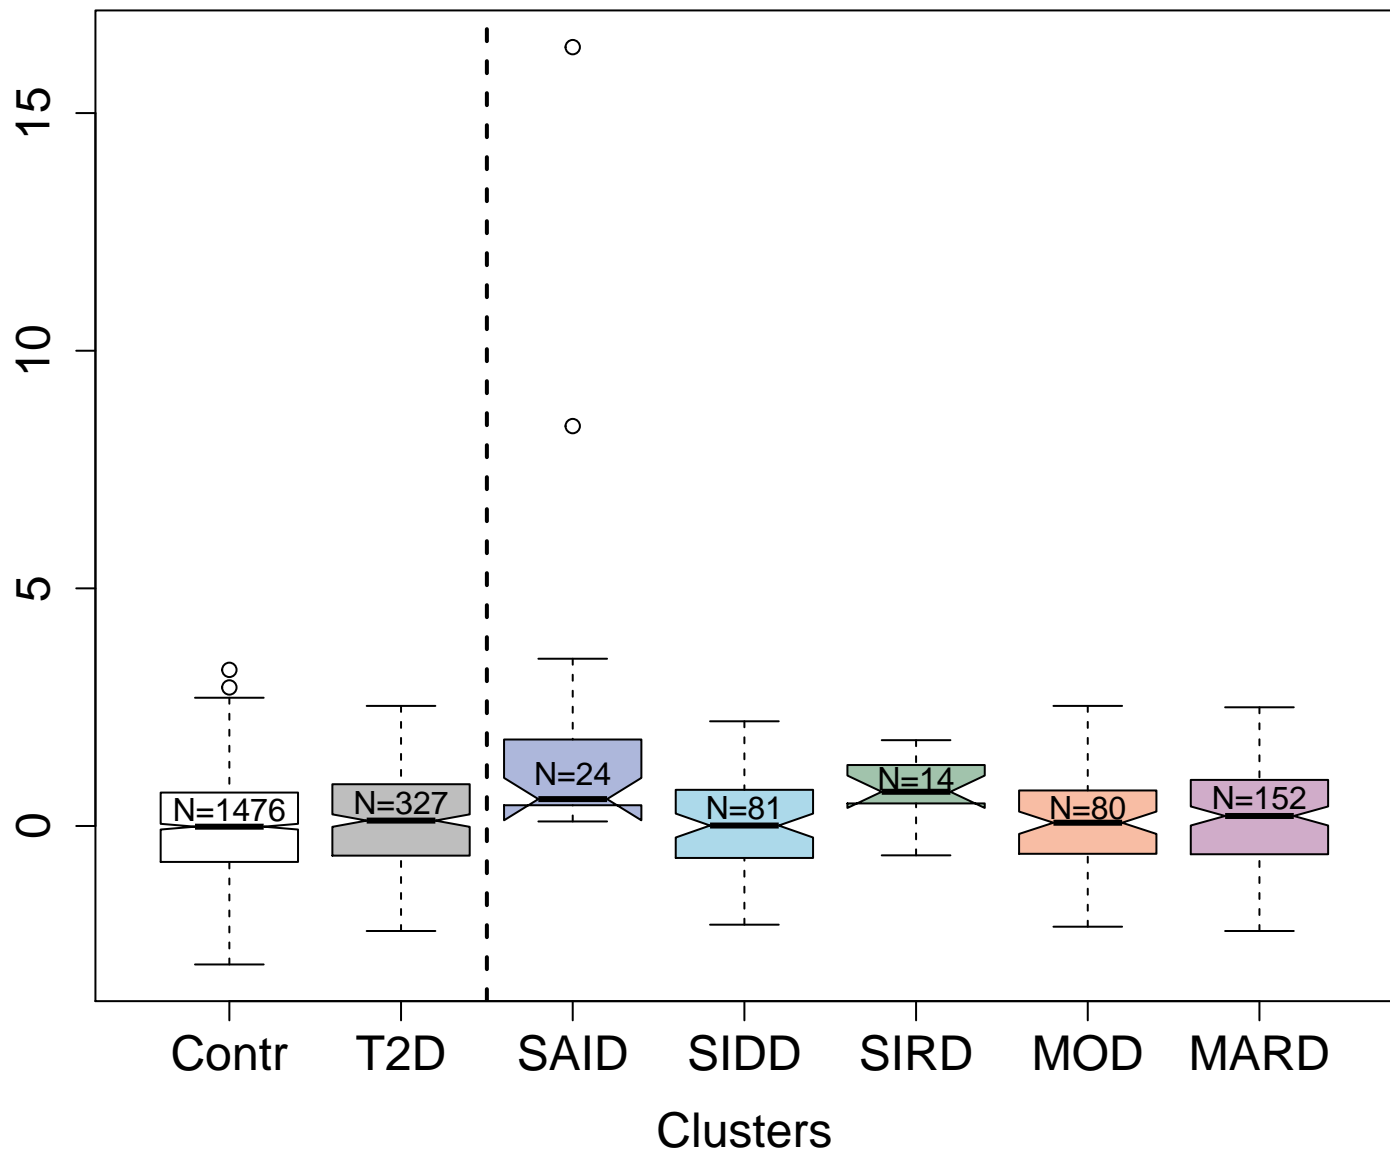

M1493 : ornithine

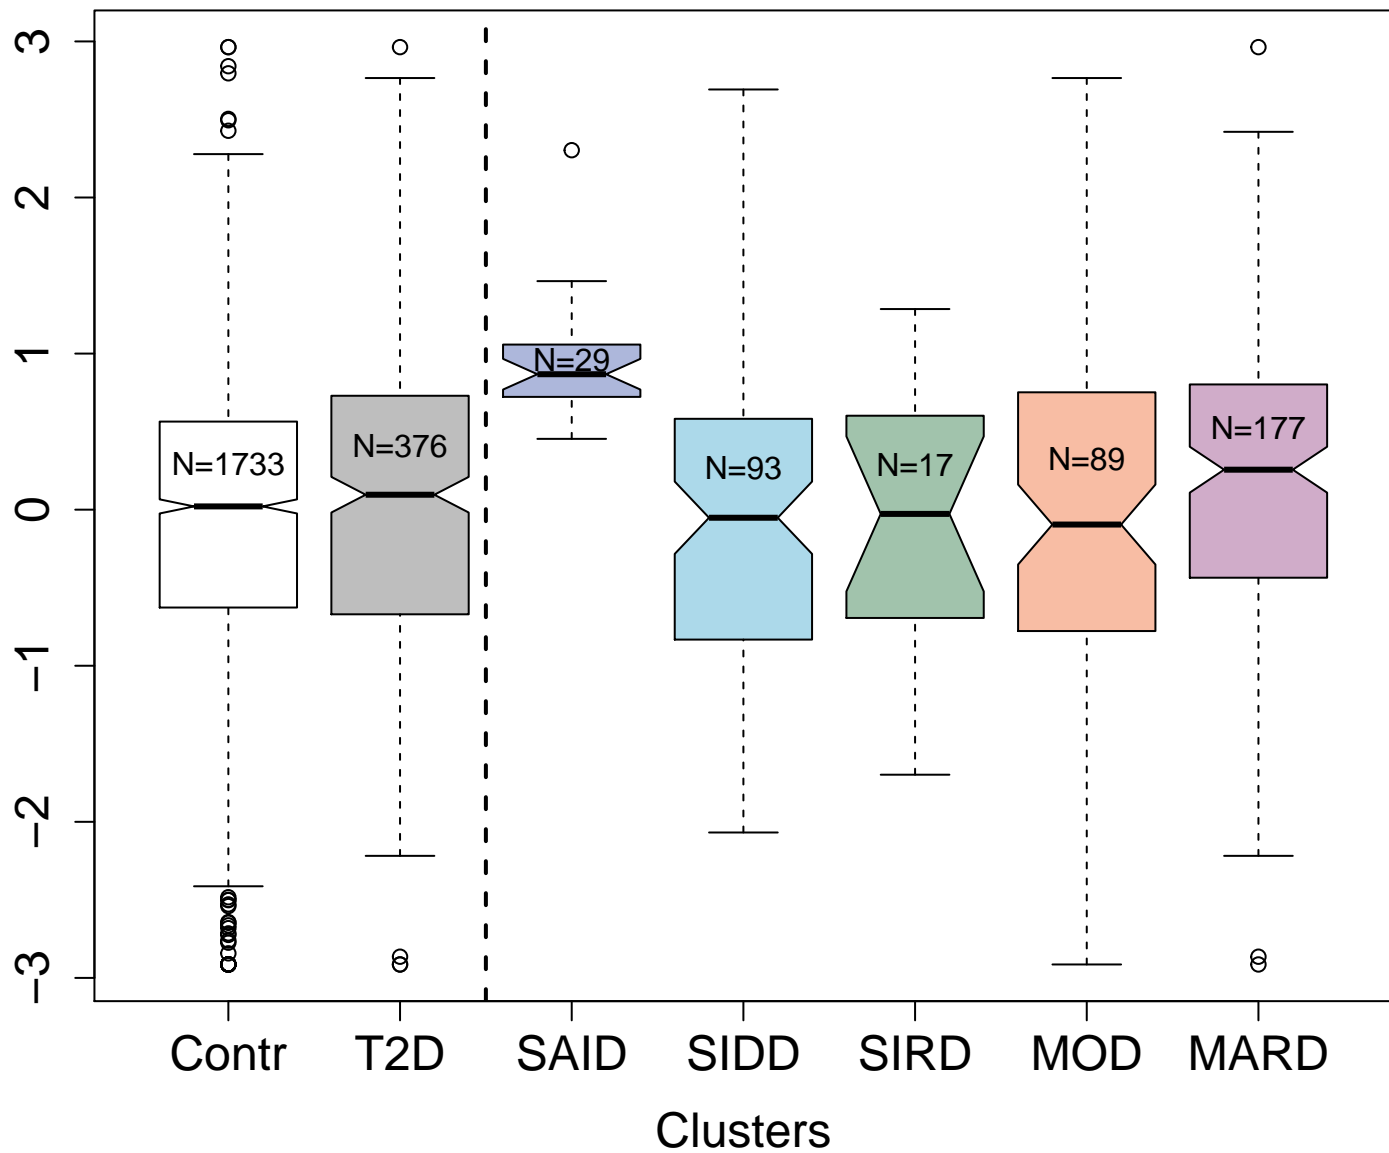

M43829 : gamma-glutamylvaline

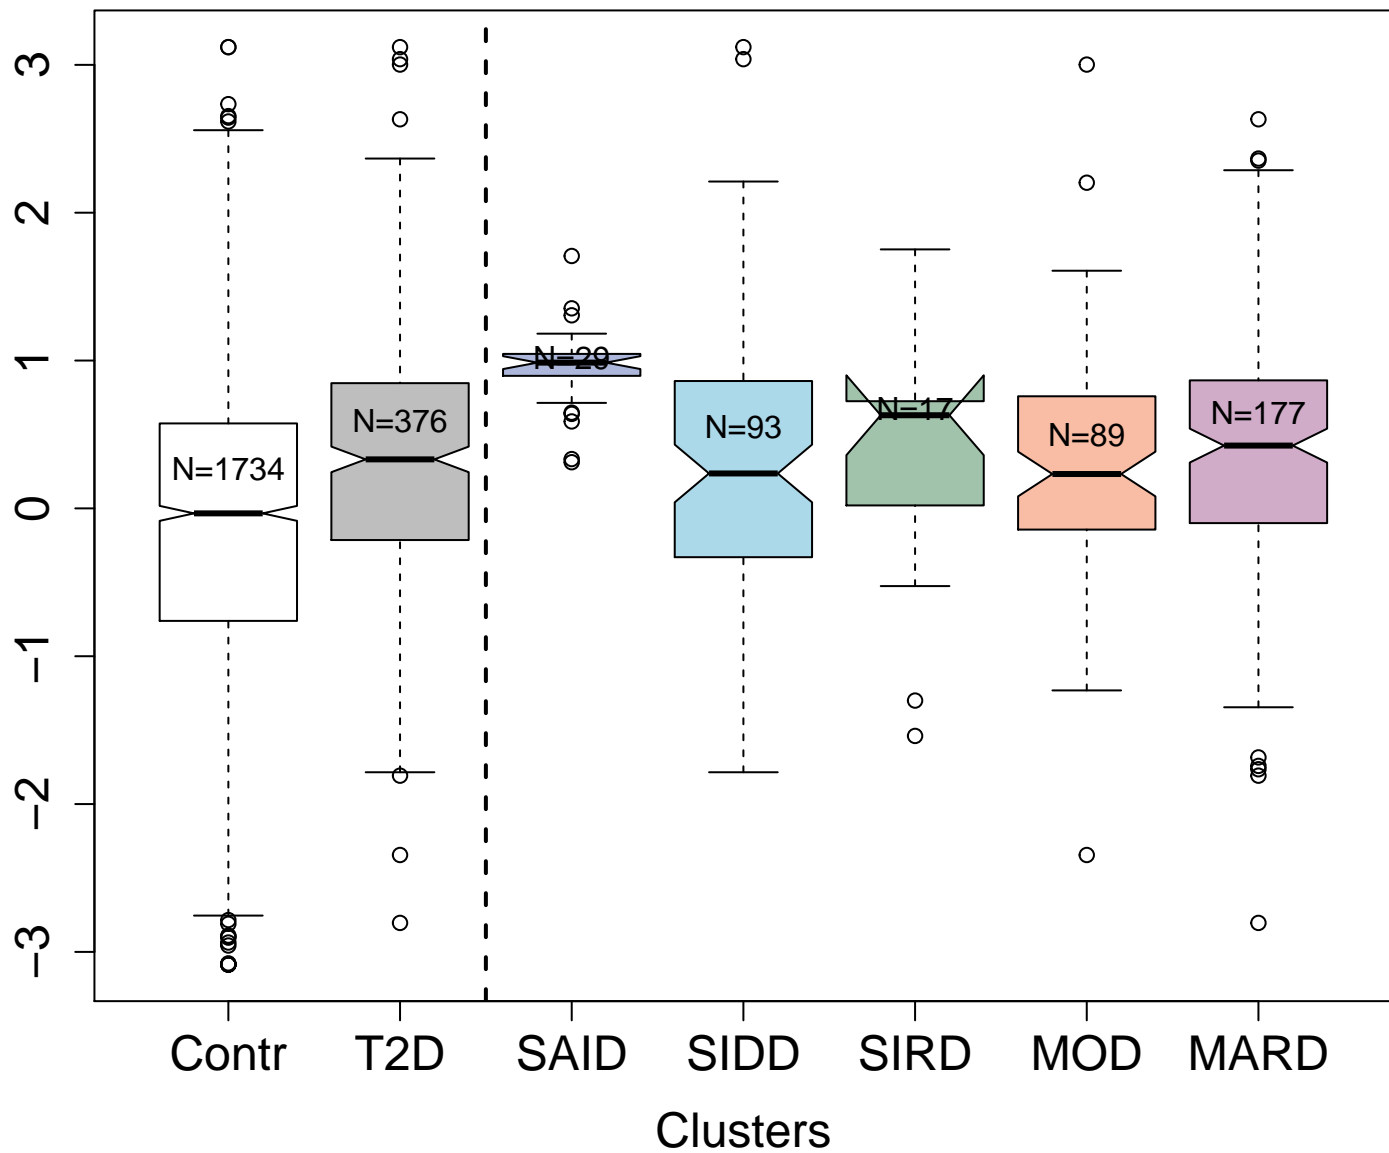



M52235 : 1-stearoyl-2-arachidonoyl-GPS (18:0/20:4)

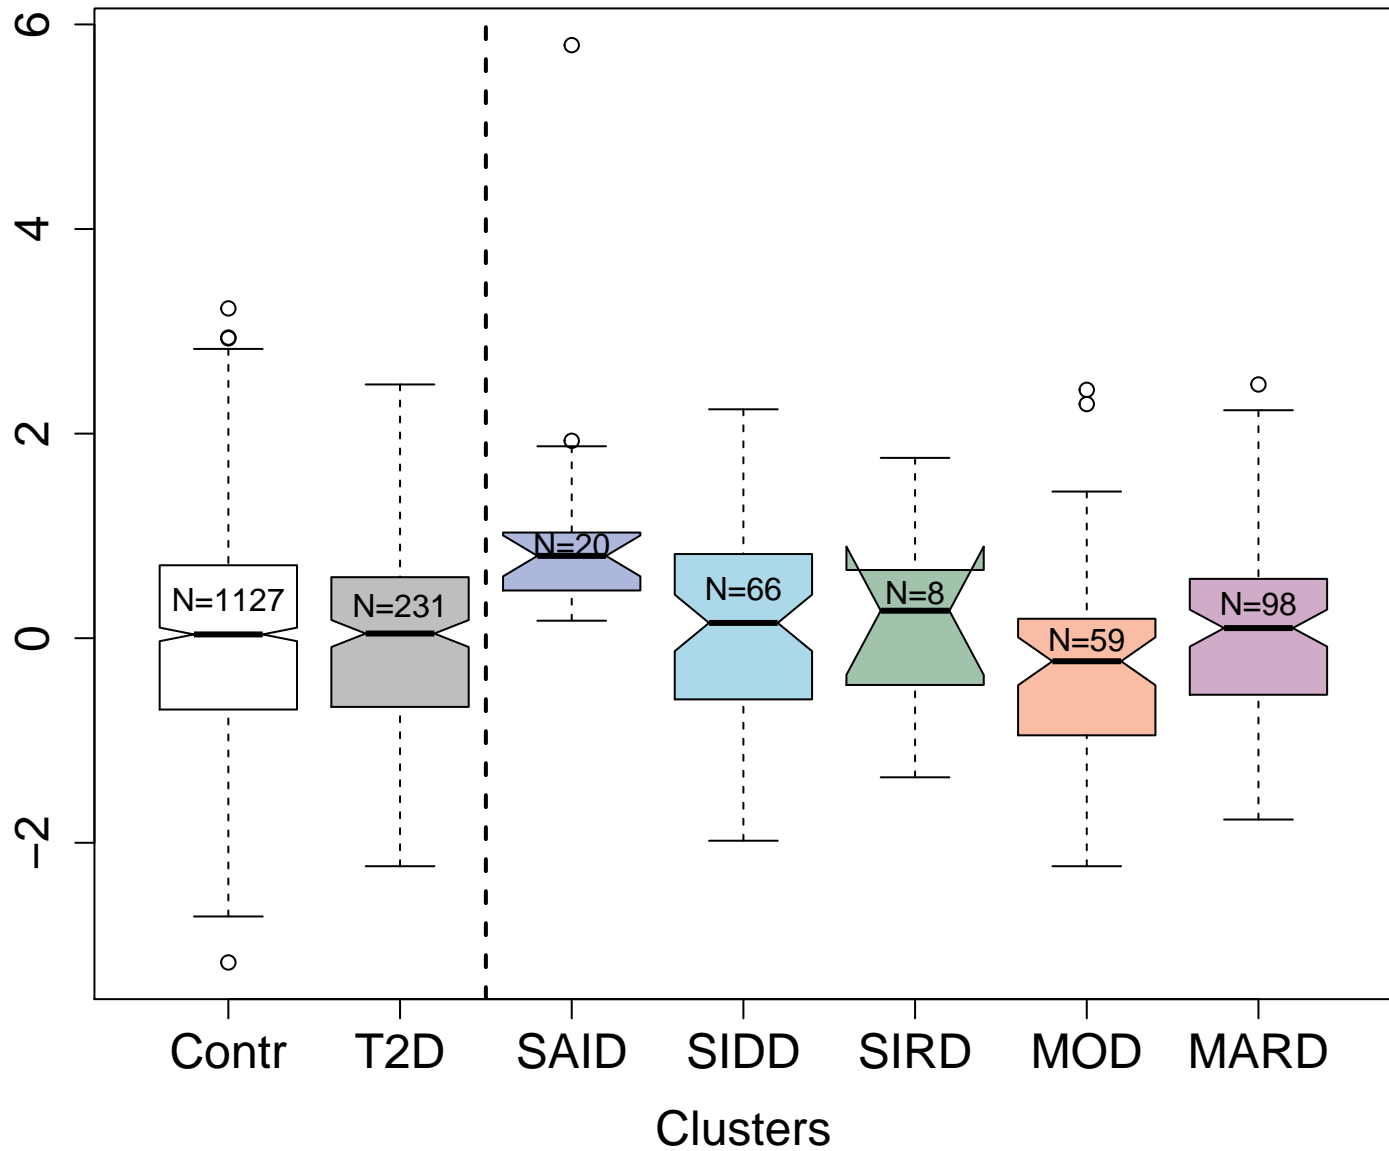

M63658 : glutamine conjugate of C7H12O2\*

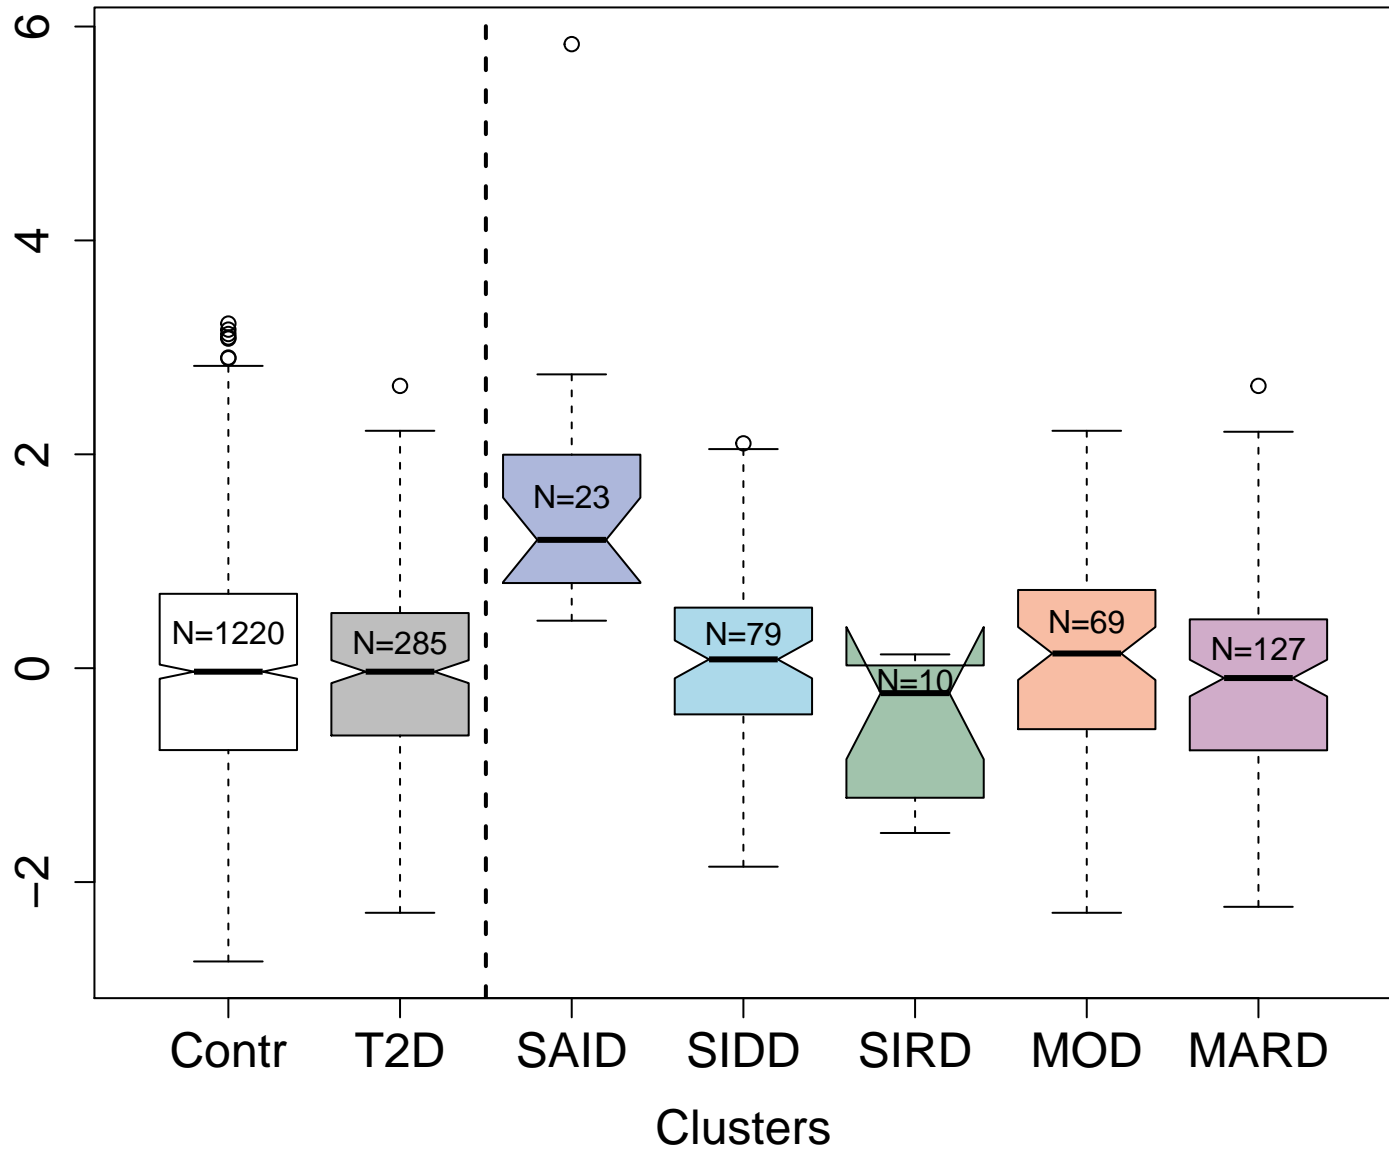

M47695 : X - 12117

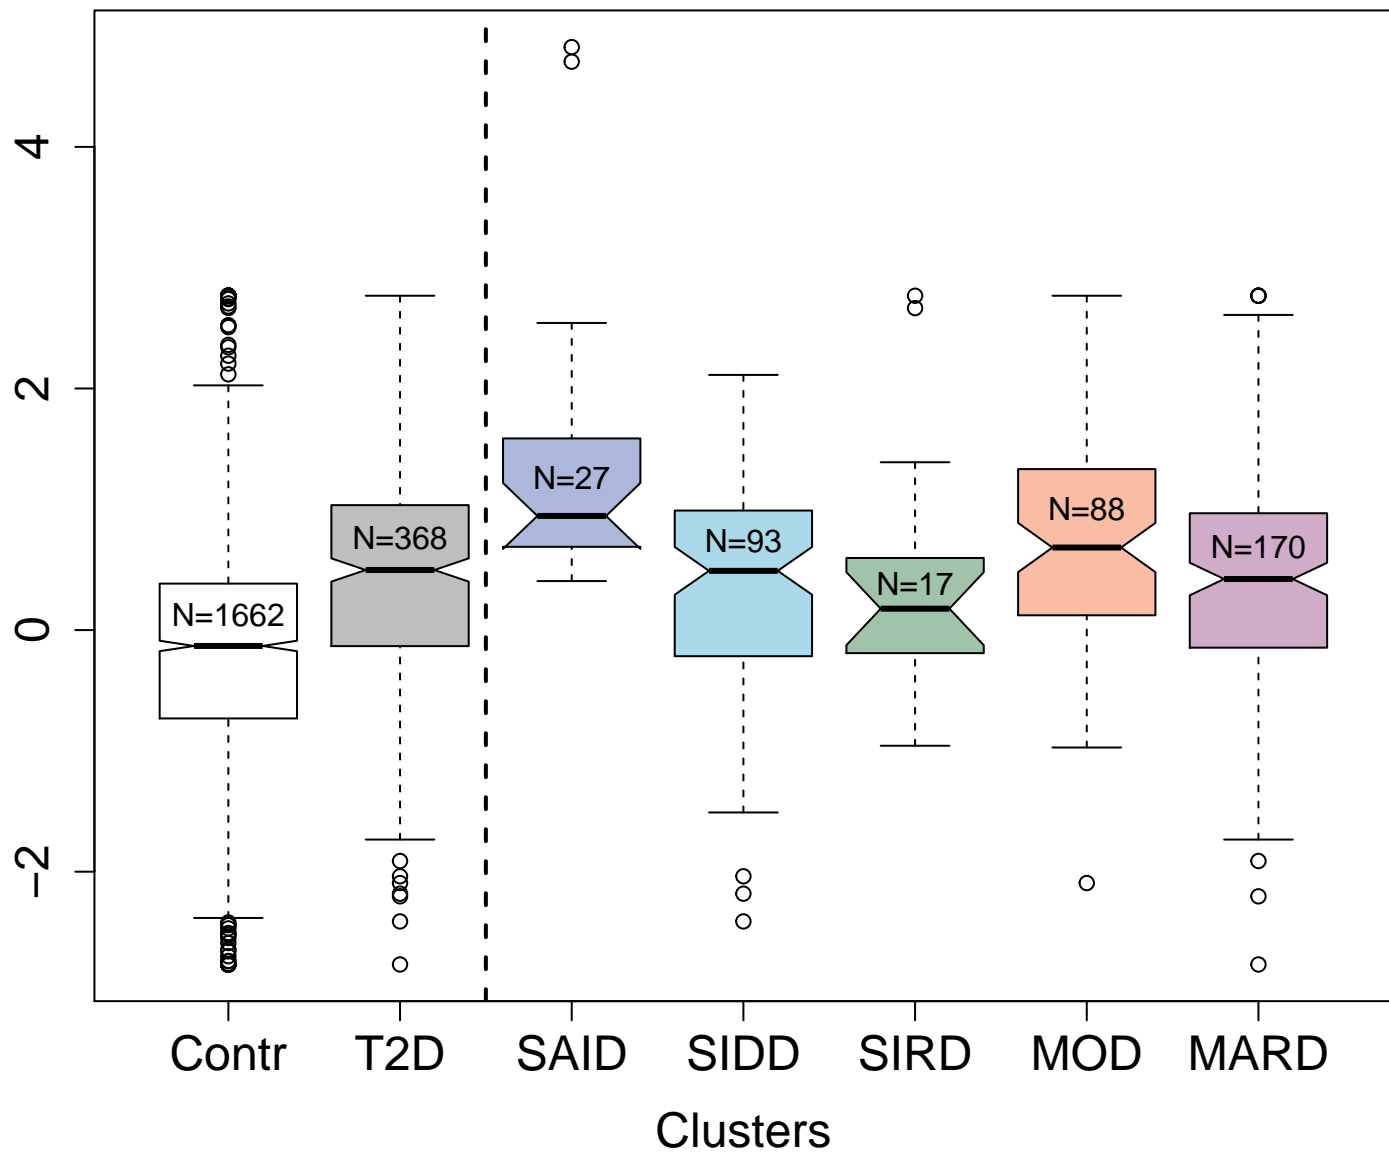

M32619 : pregnenediol sulfate (C21H34O5S)\*

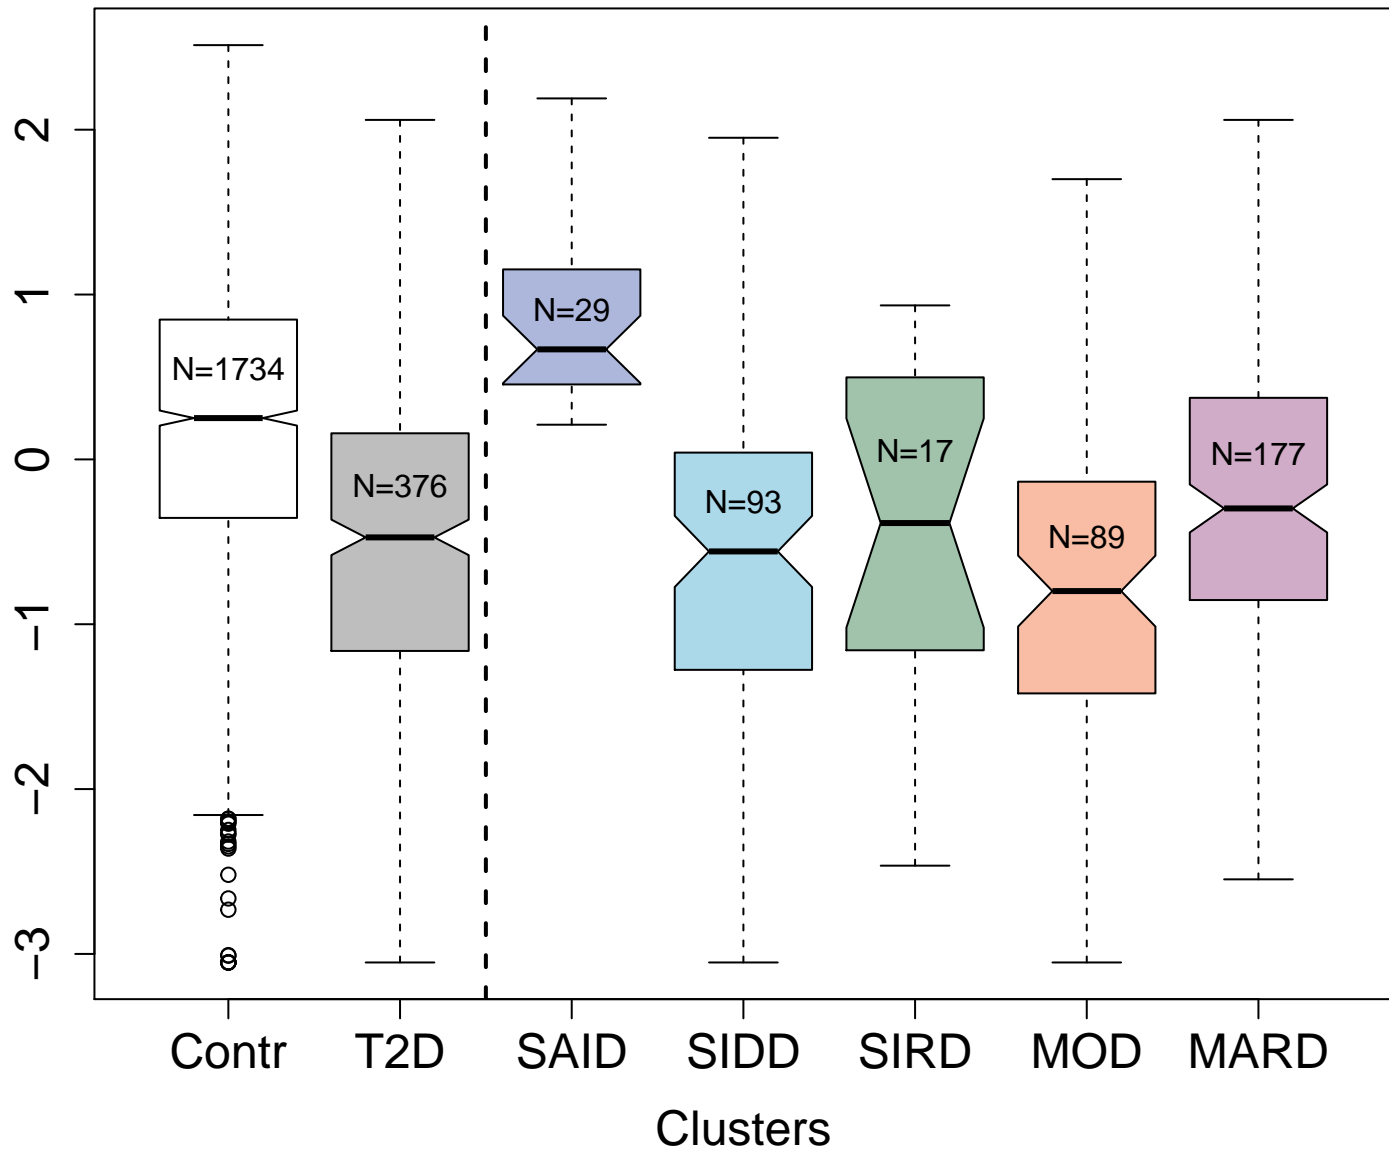

M52446 : 1-stearoyl-2-linoleoyl-GPE (18:0/18:2)\*

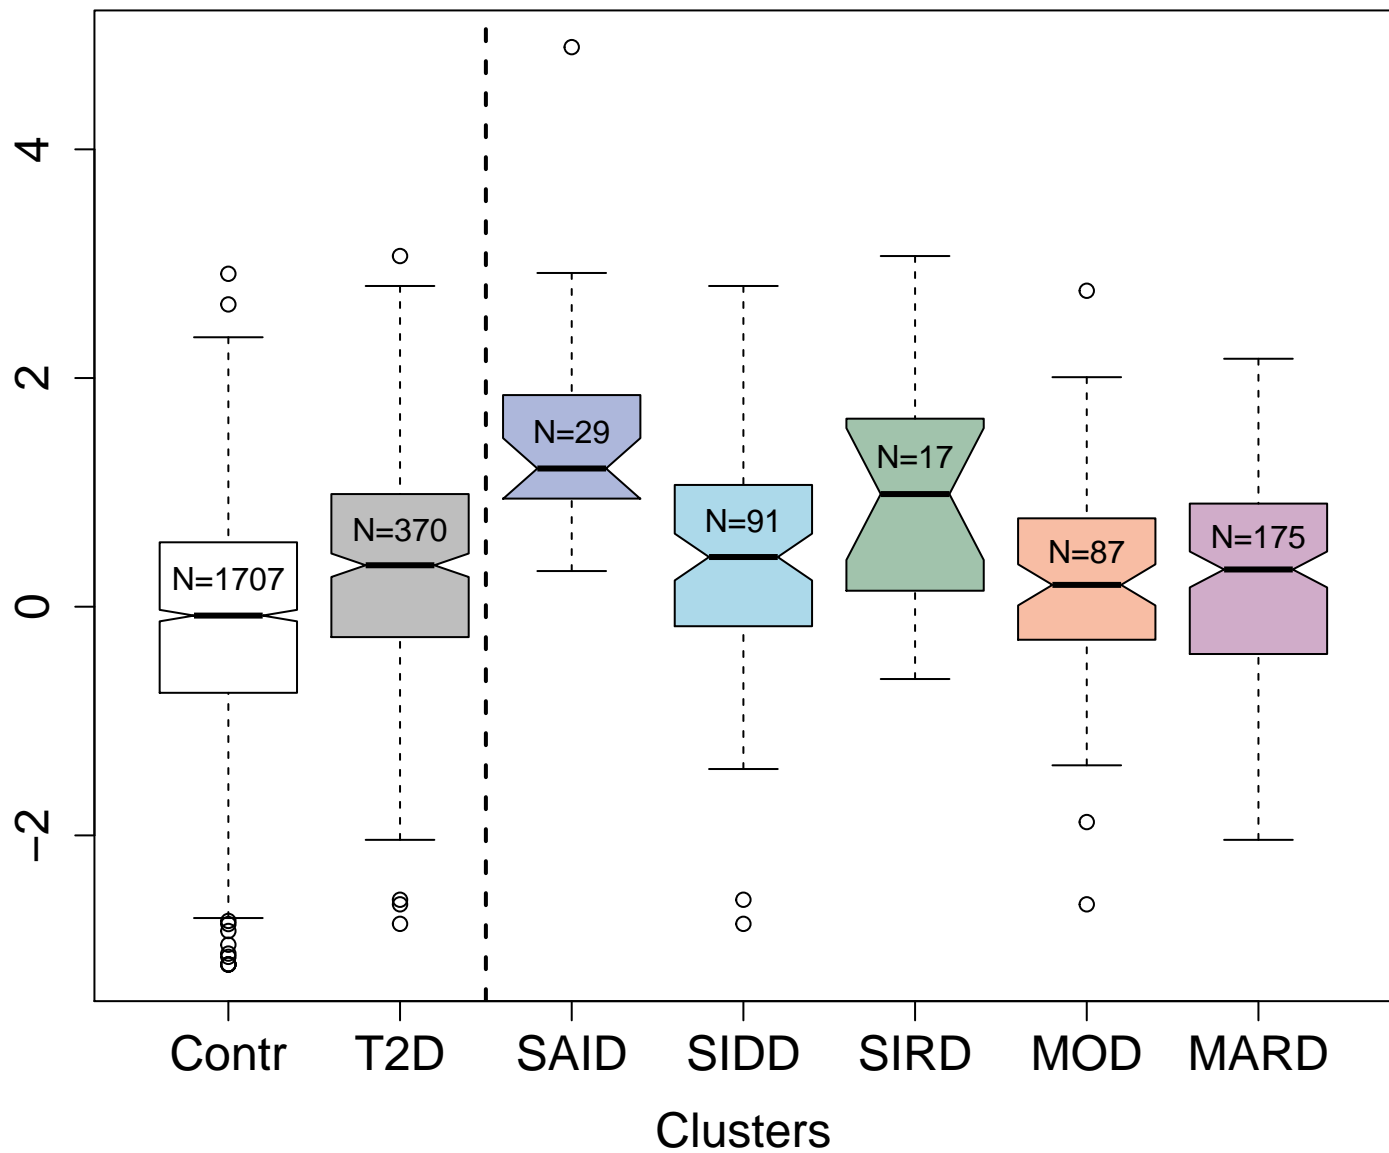

M63251 : 11beta-hydroxyandrosterone glucuronide

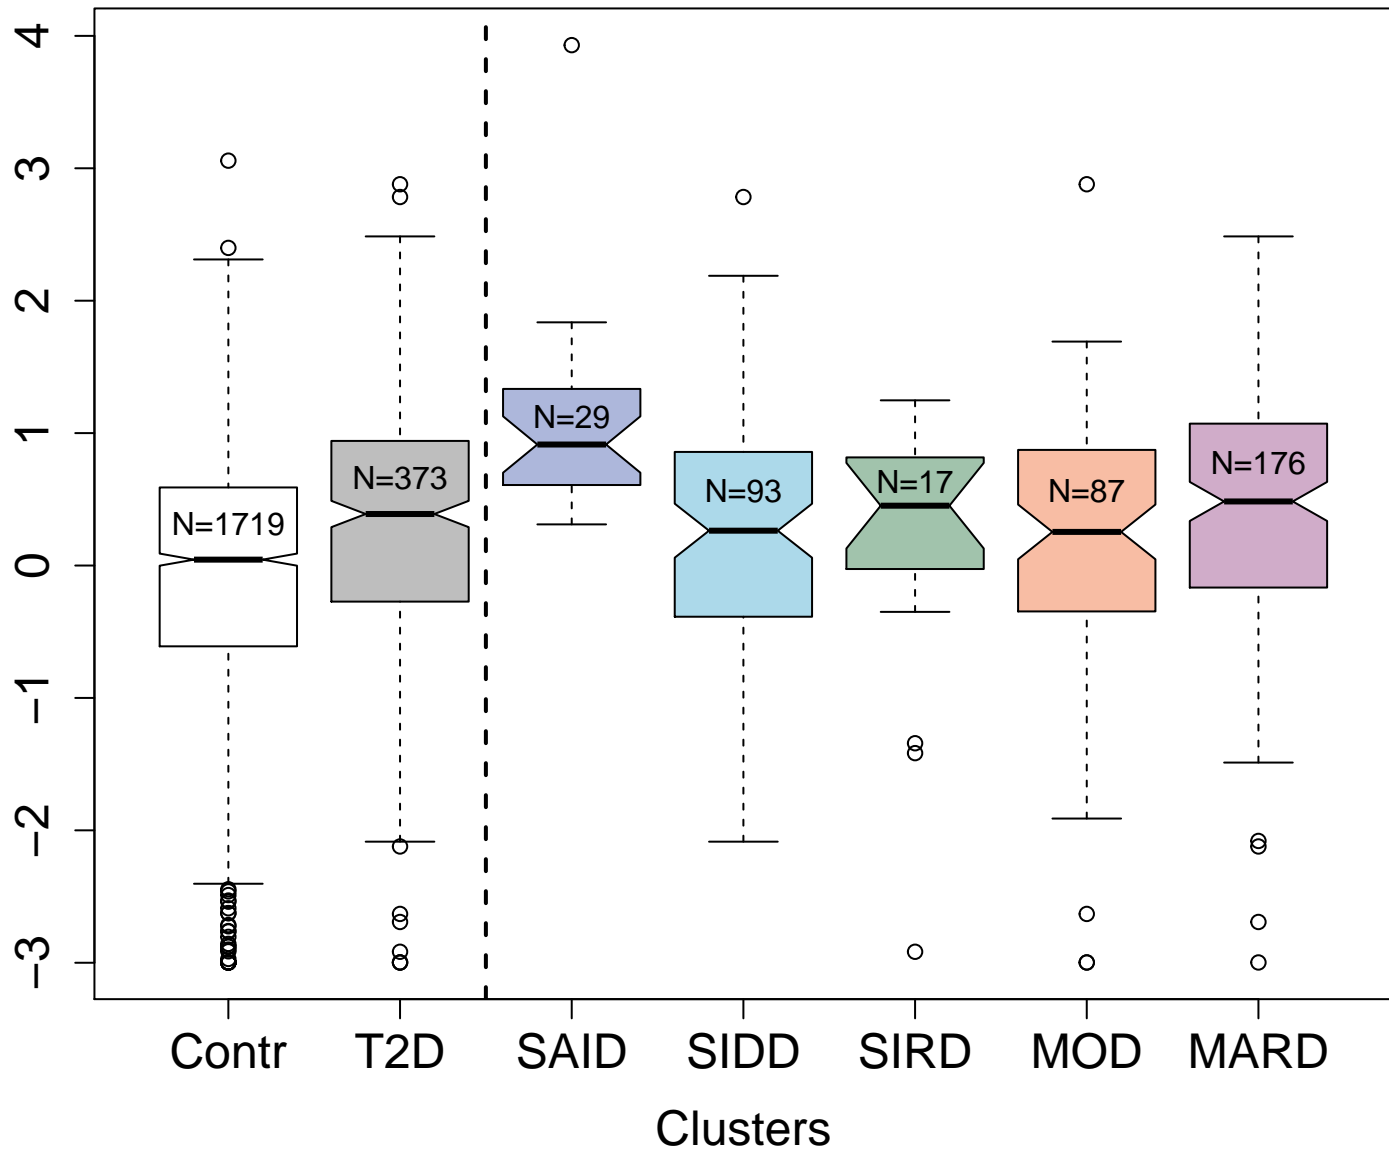

M42463 : sphingomyelin (d18:1/14:0, d16:1/16:0)\*

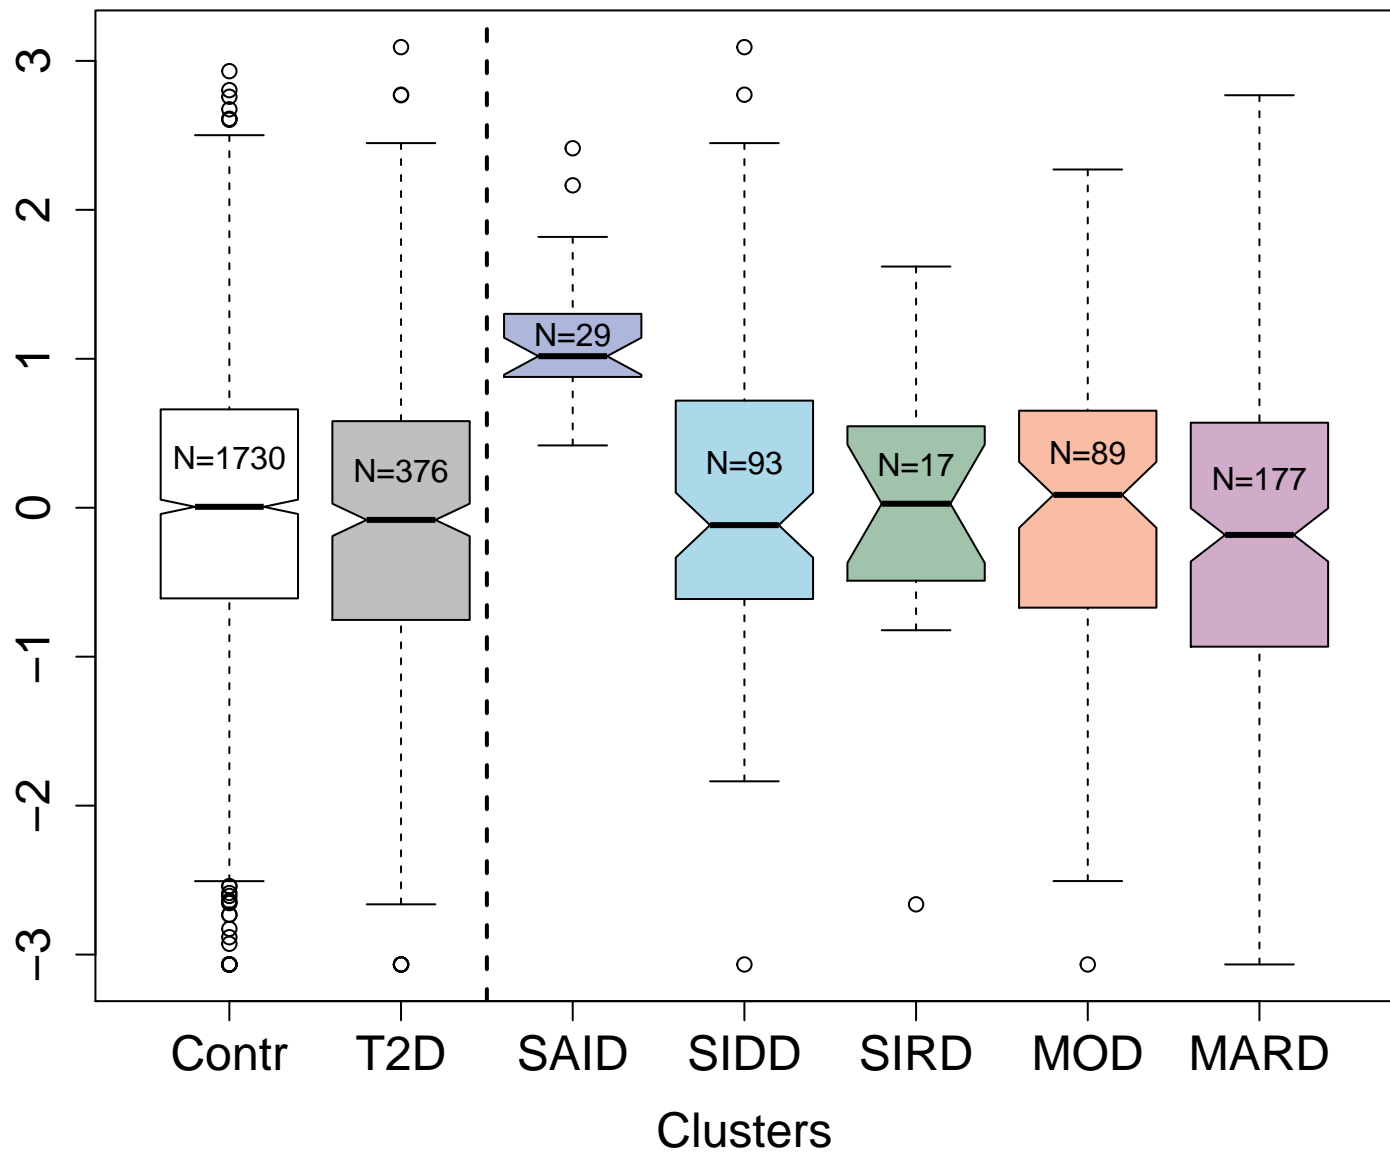

M48258 : 1-oleoyl-GPC (18:1)

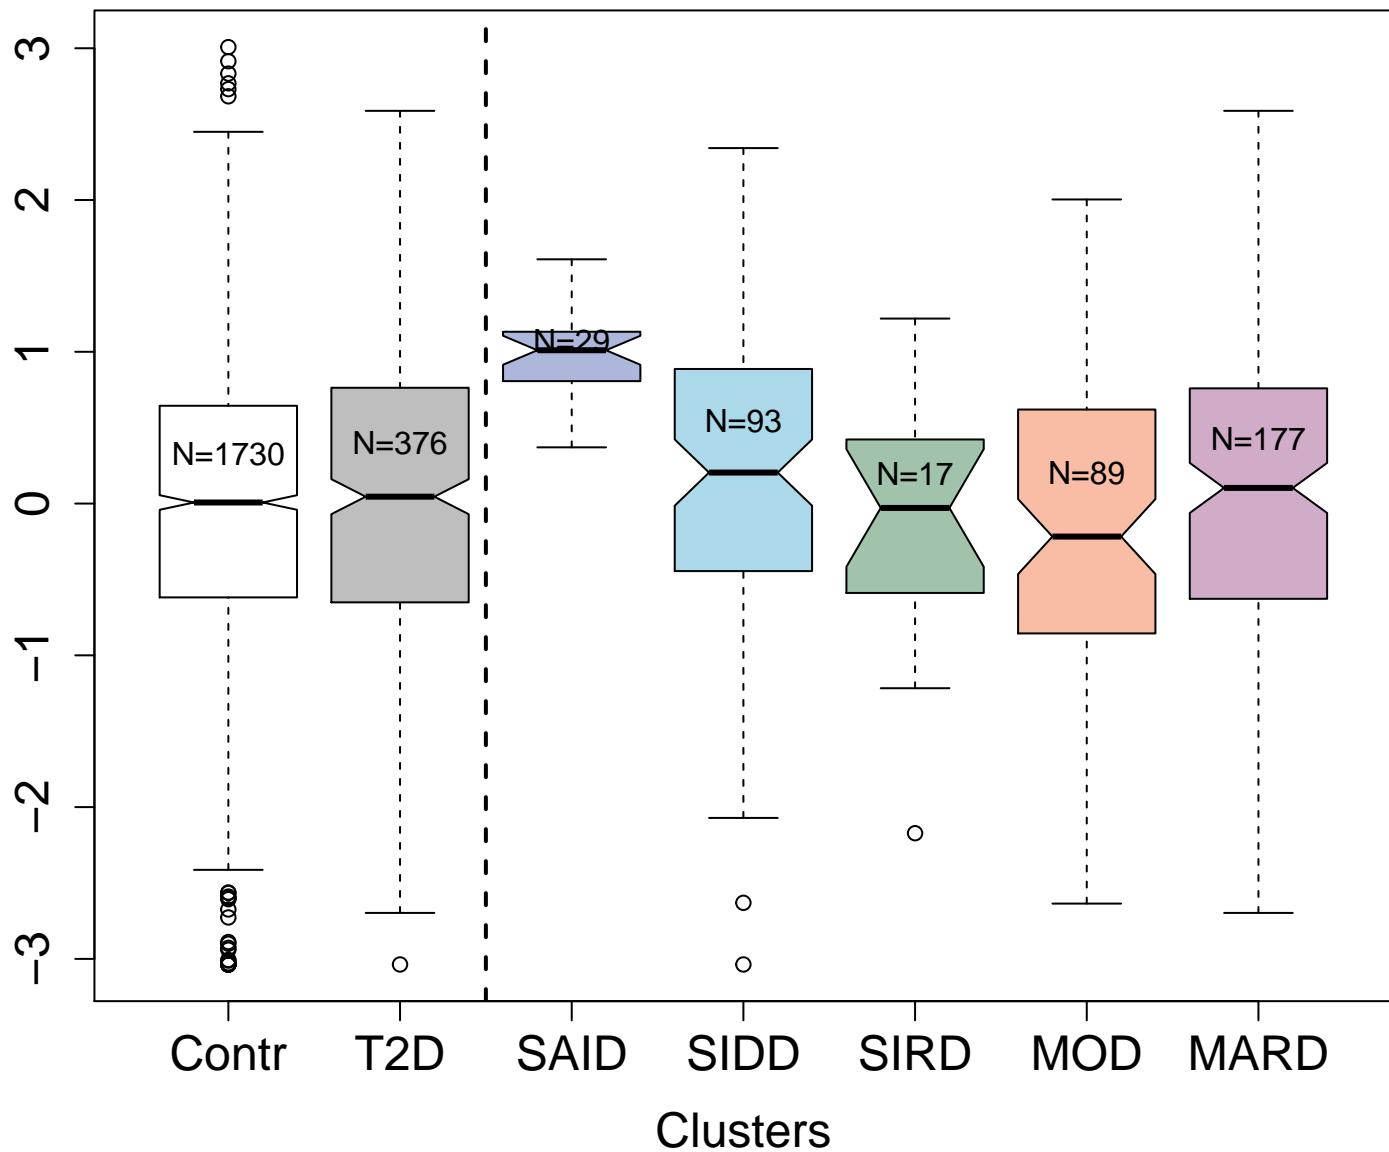



M33971 : 10-heptadecenoate (17:1n7)

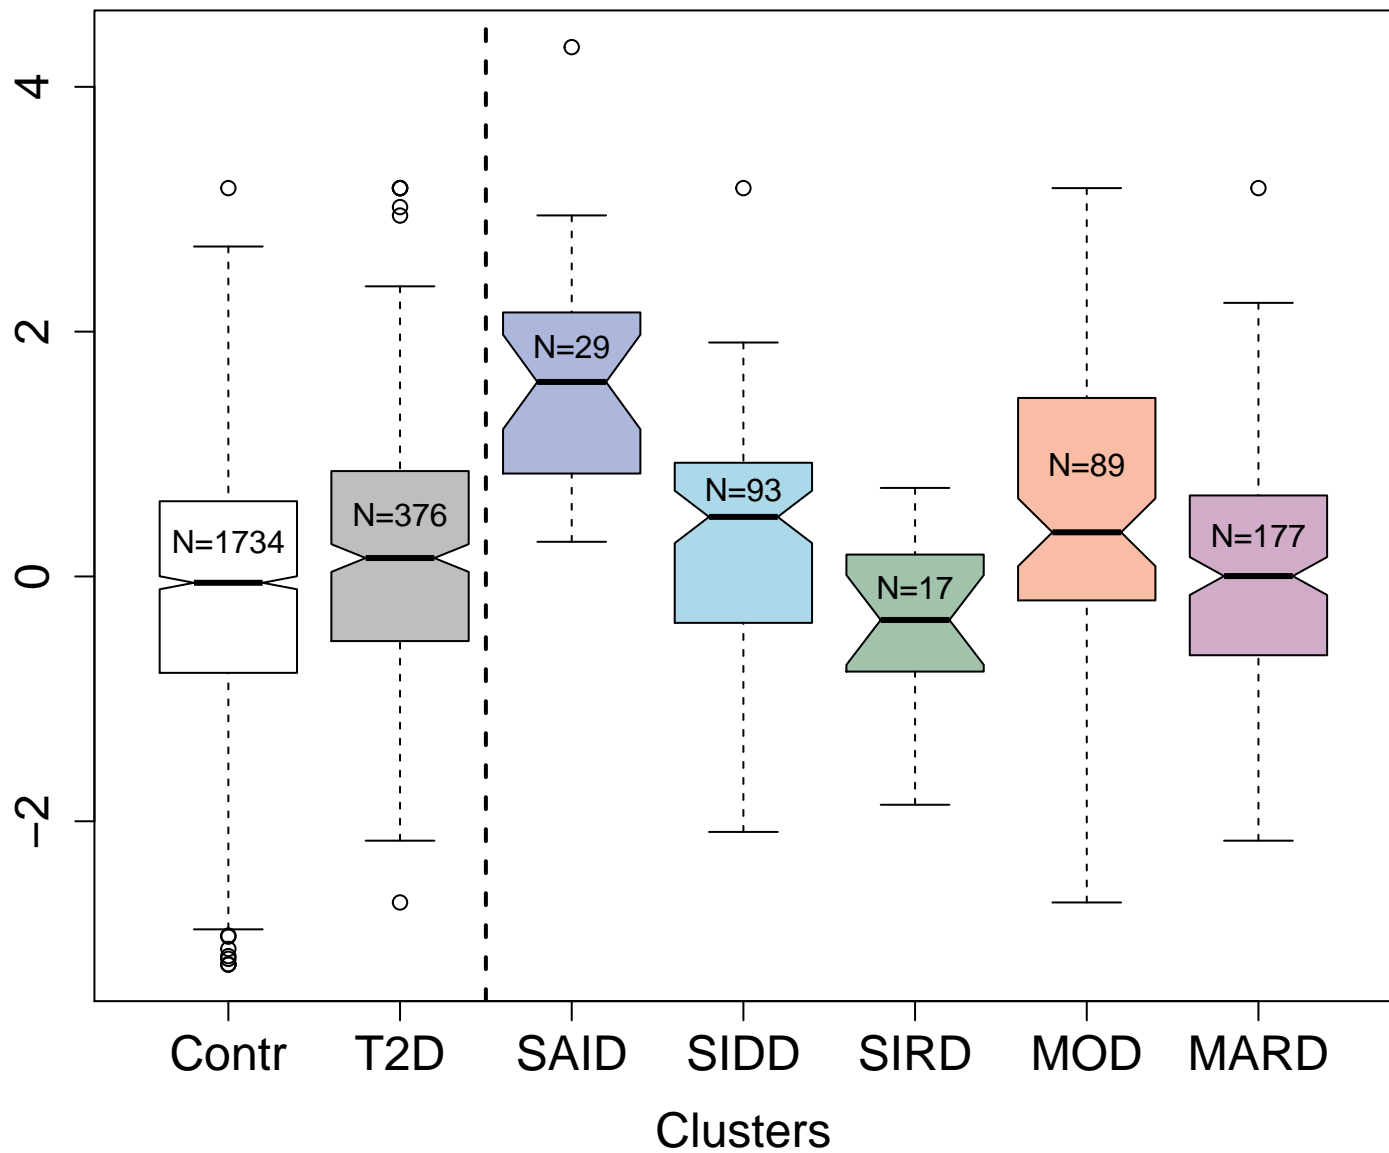

M27414 : beta-sitosterol

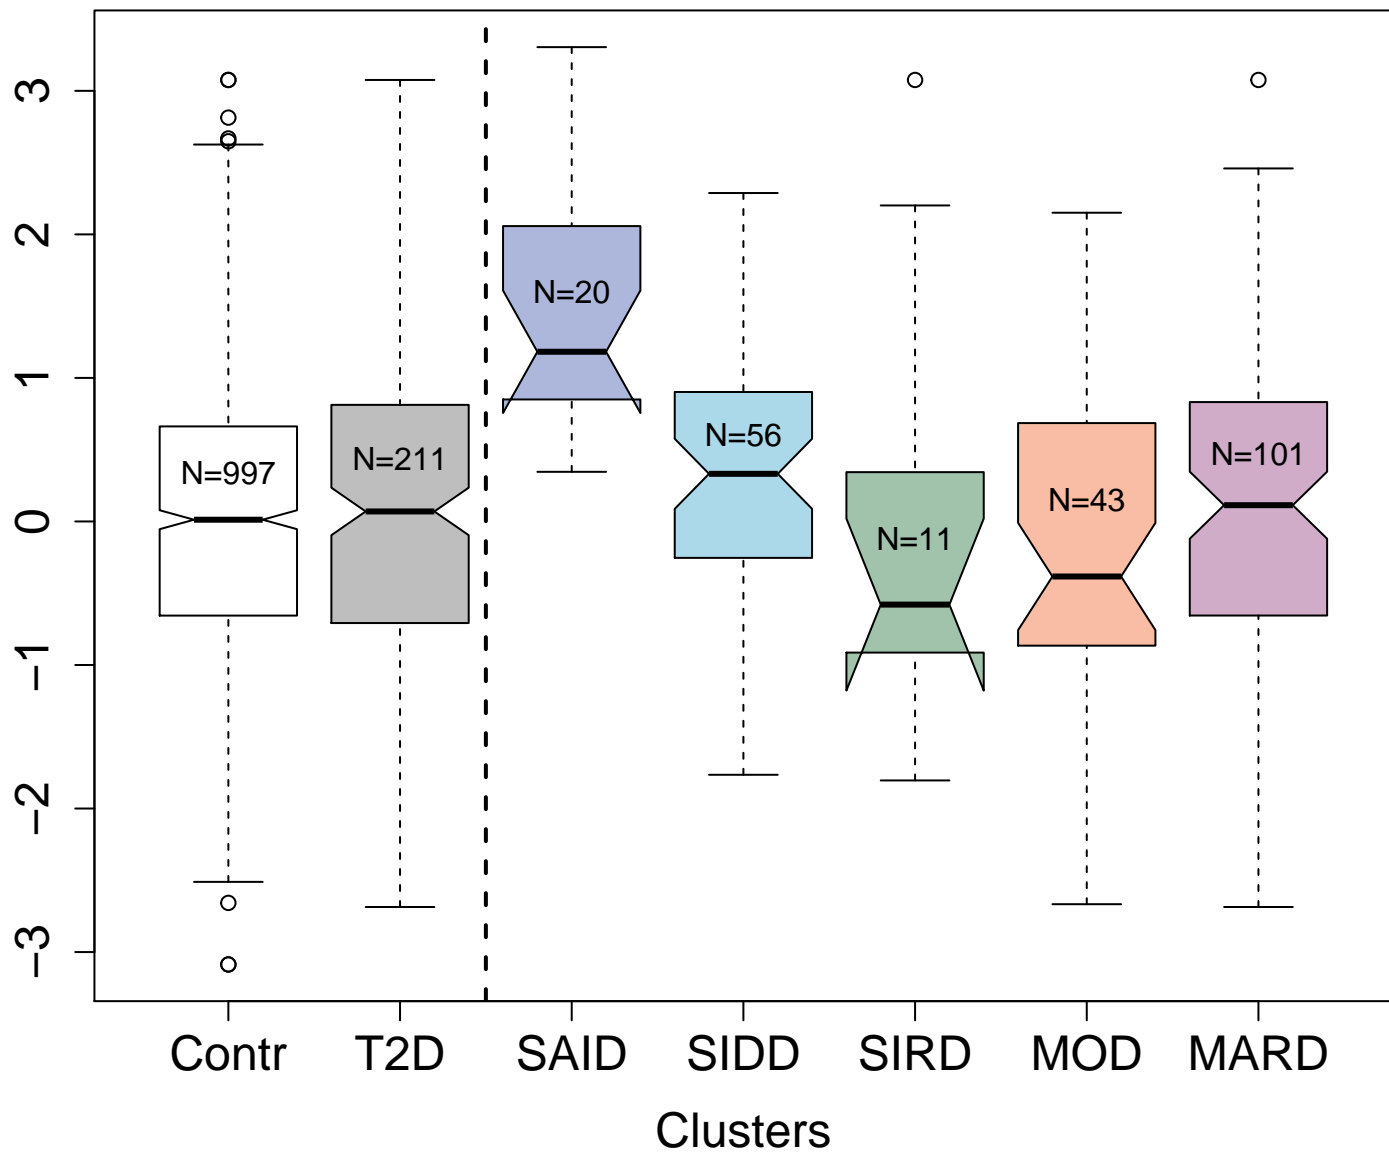

M64 : phenylalanine

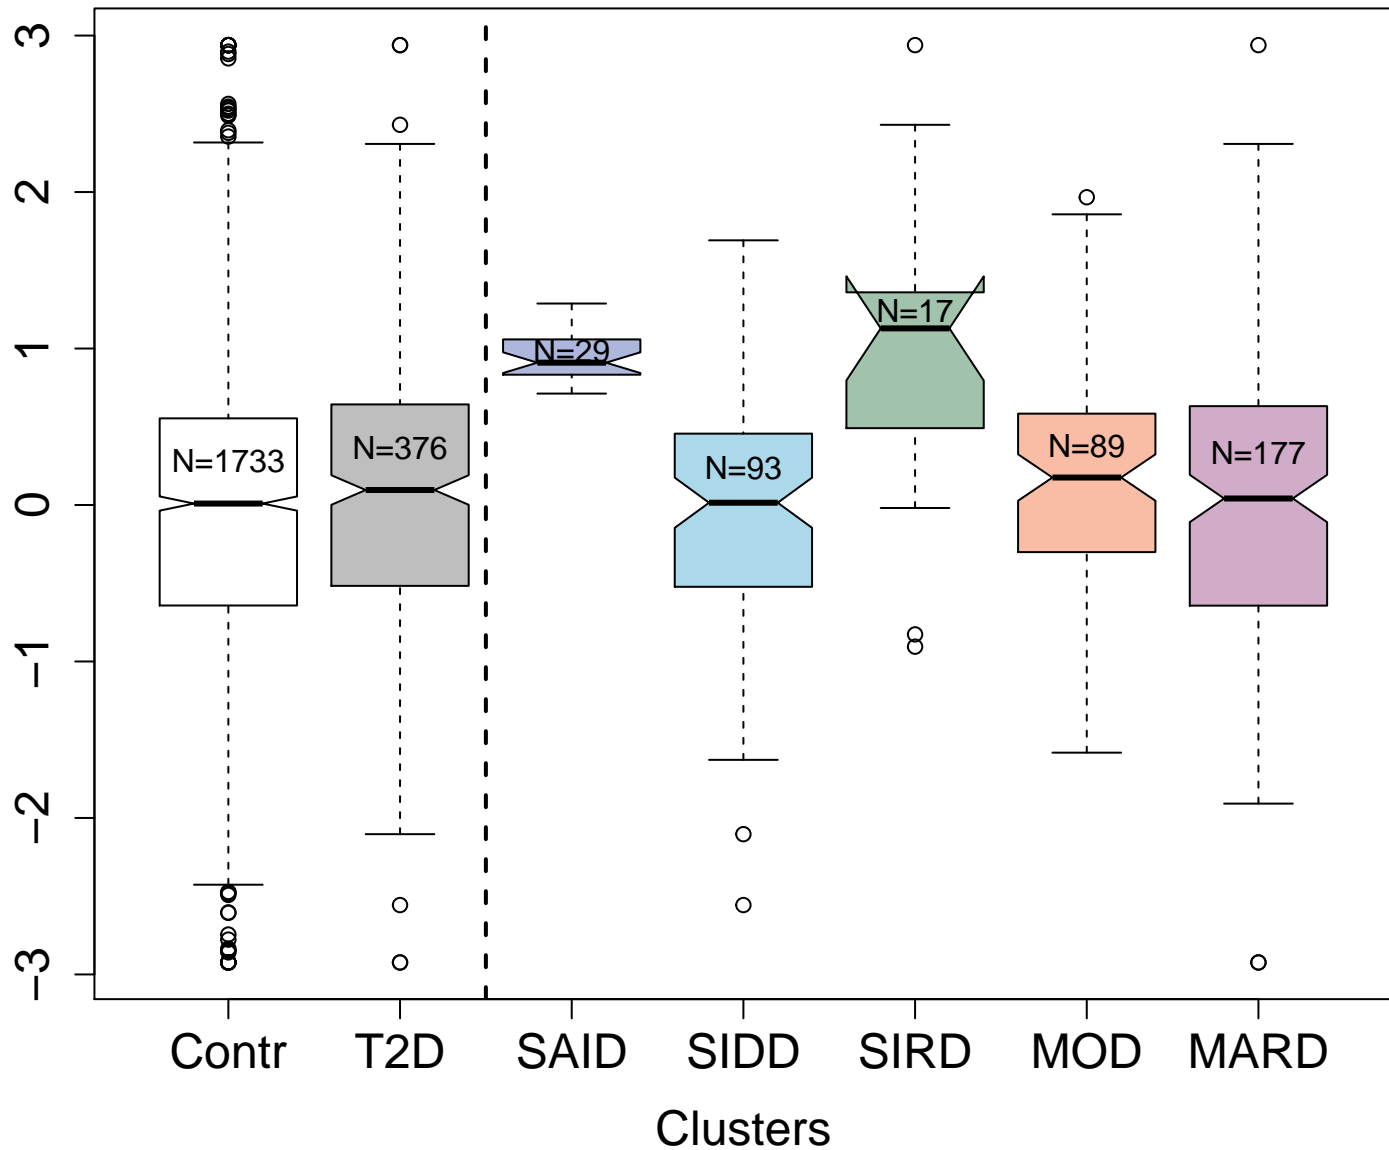

M37073 : alpha-hydroxycaproate

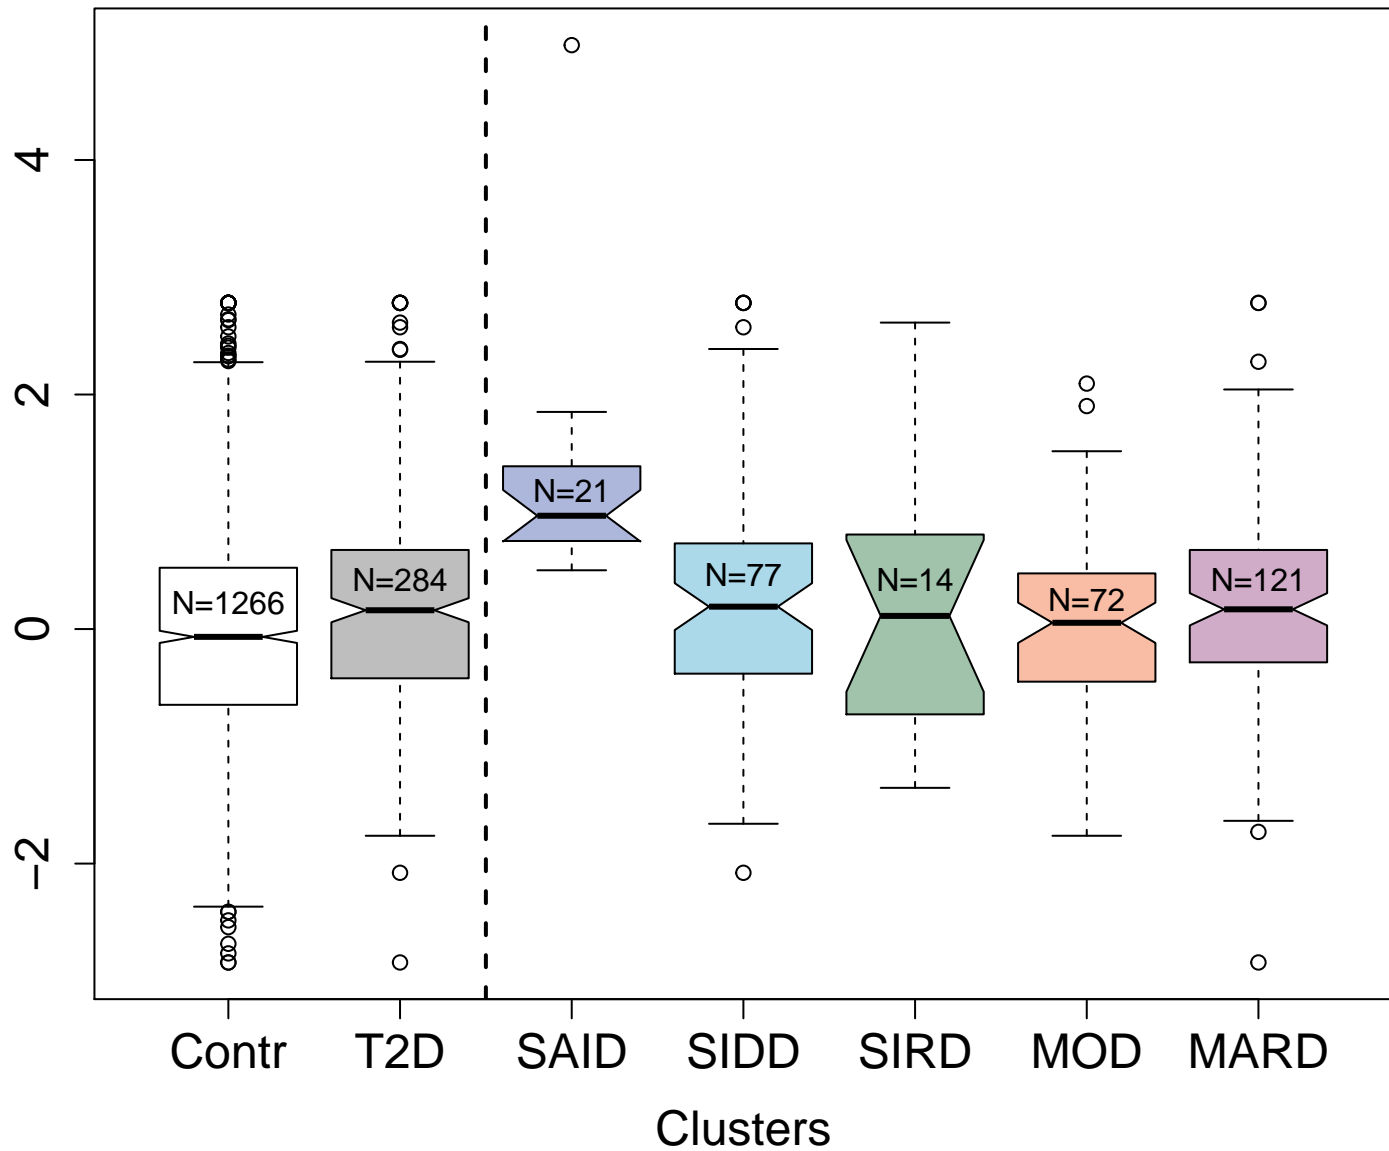

M53223 : palmitoleylcarnitine (C16:1)\*

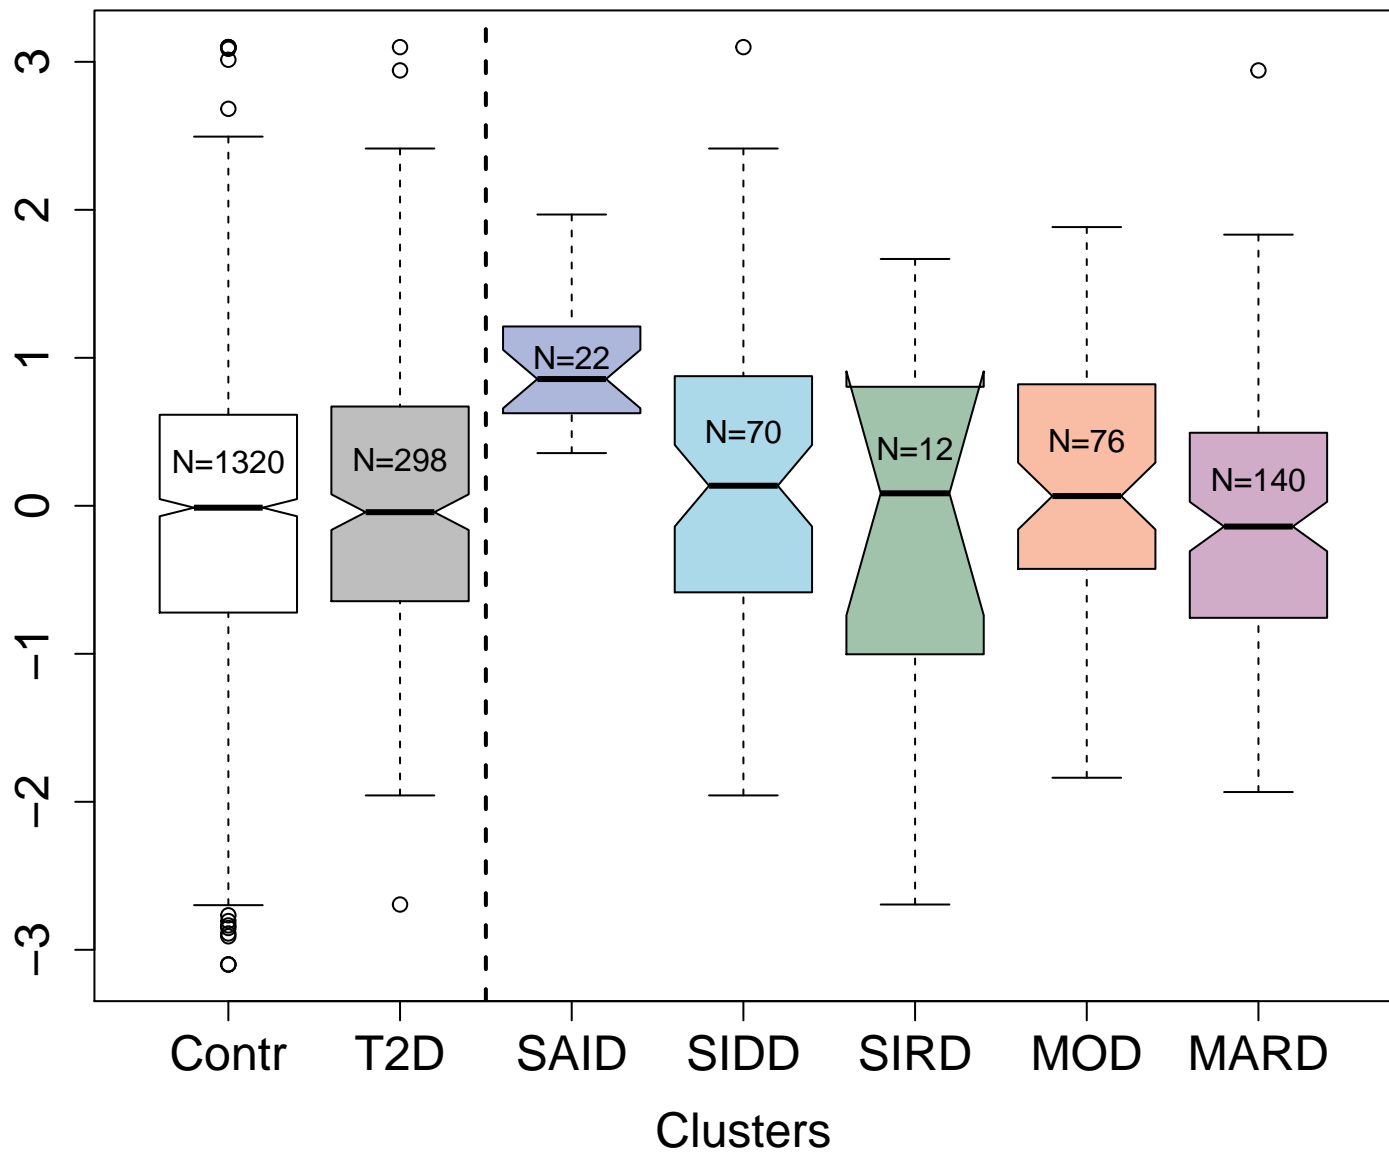

M37210 : androstenediol (3beta,17beta) monosulfate (2)

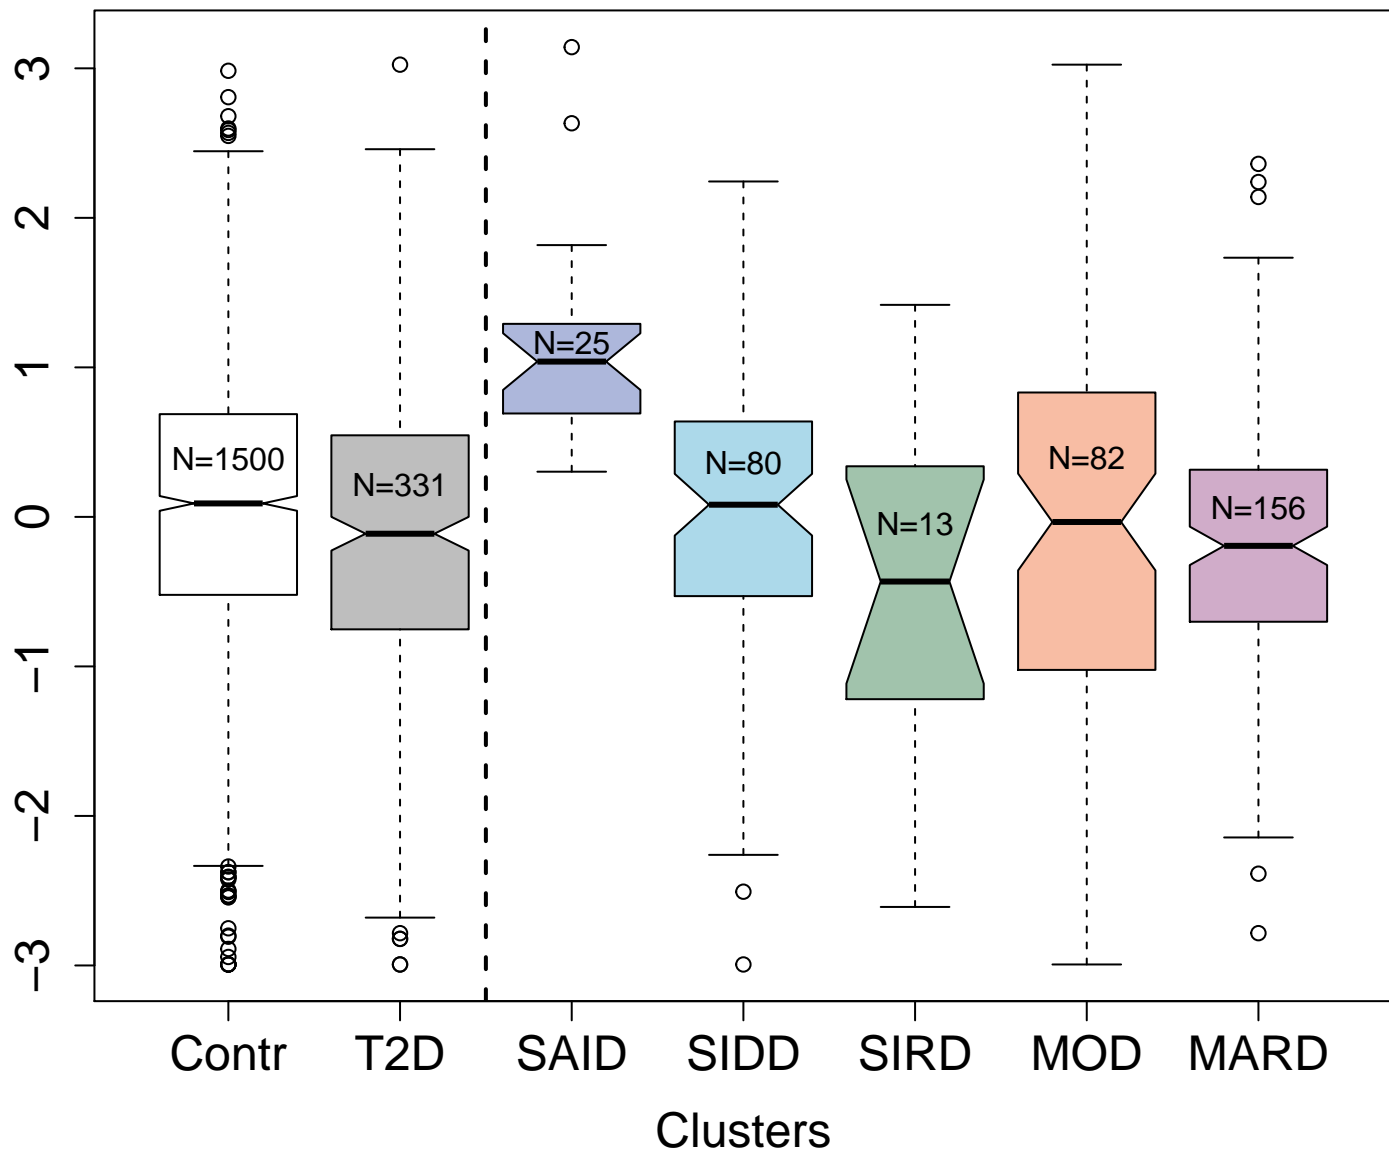

M46799 : oleoyl-linoleoyl-glycerol (18:1/18:2) [2]

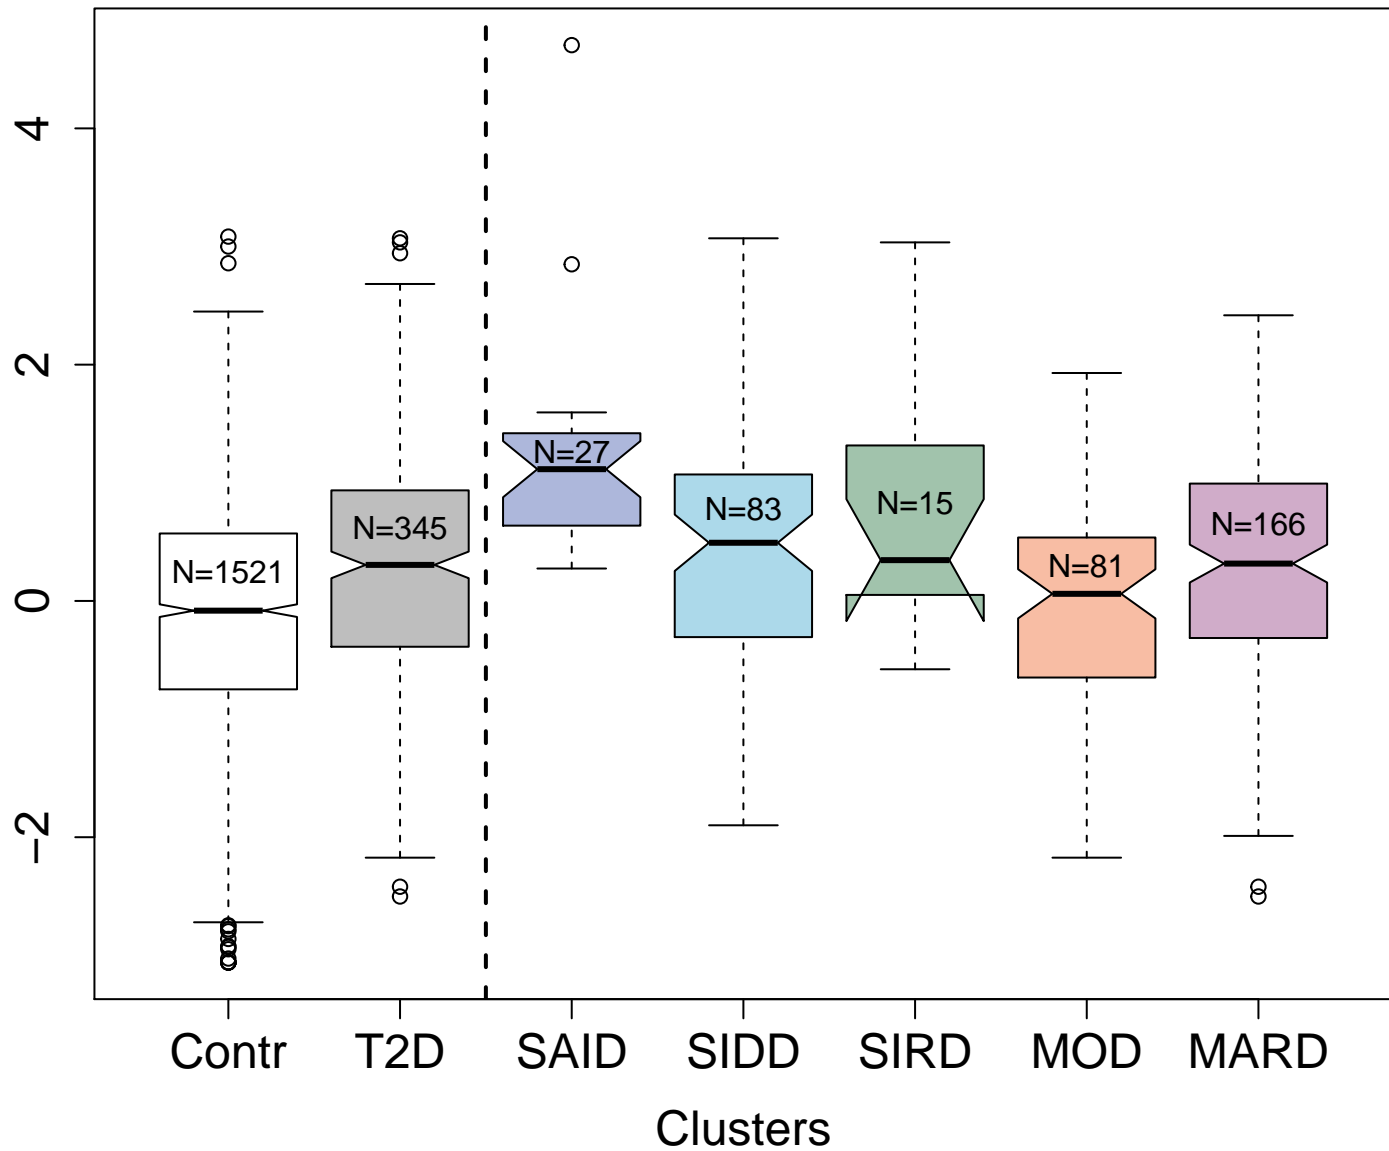

M32980 : adrenate (22:4n6)

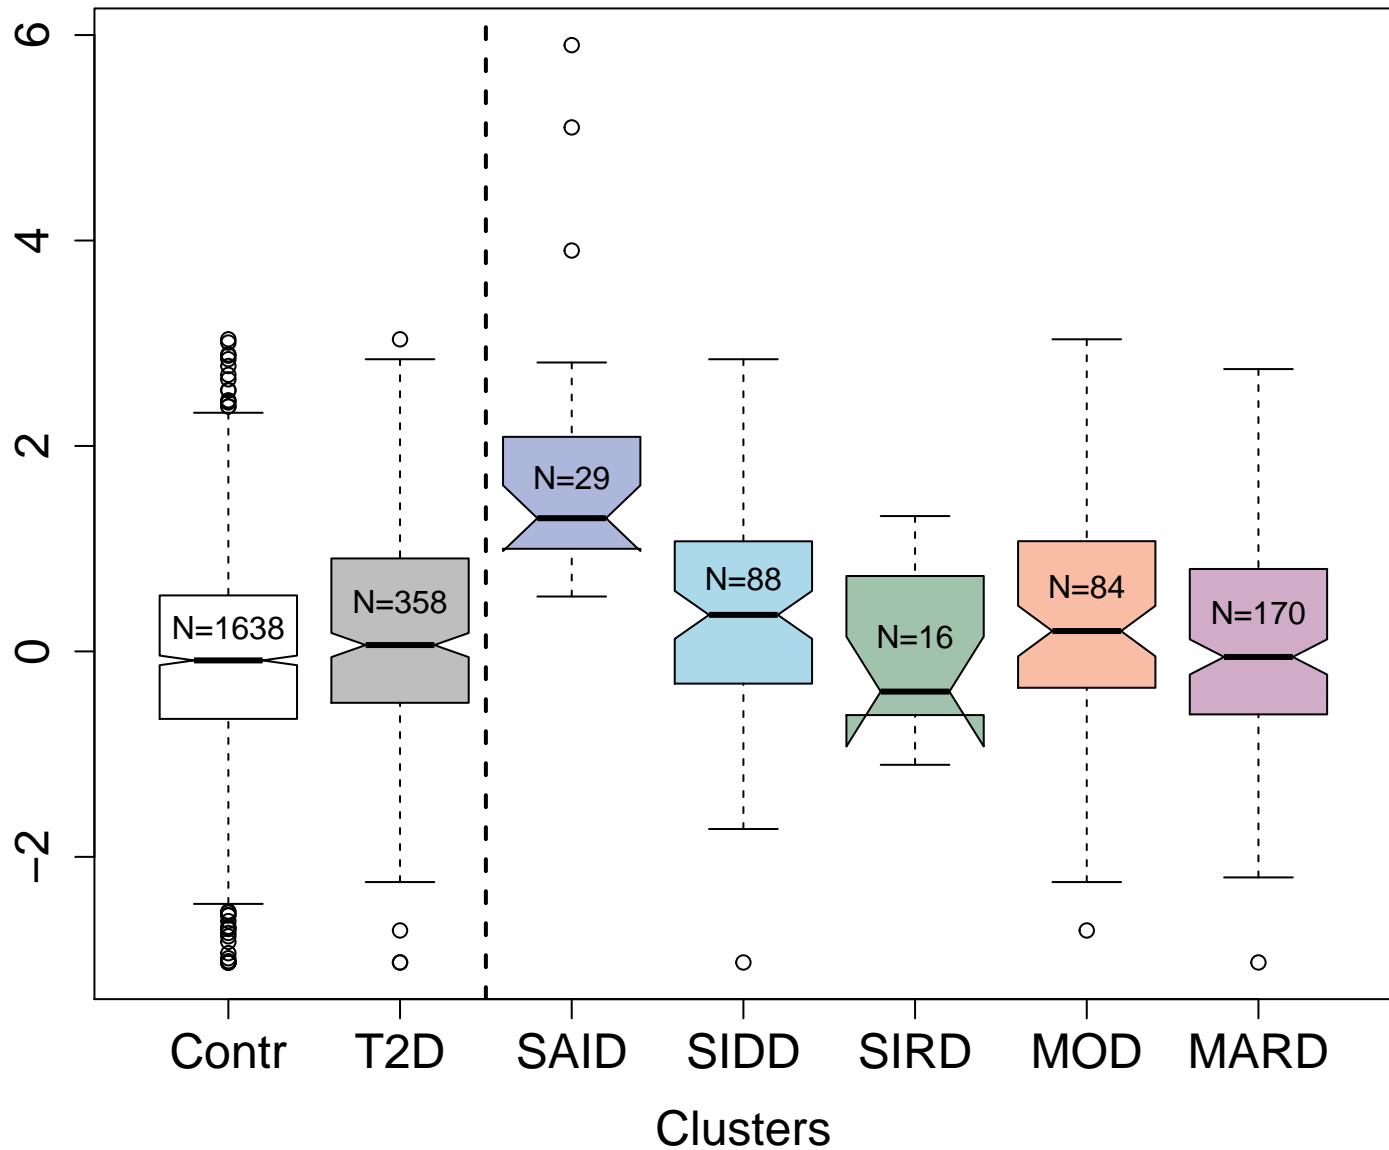



M39600 : 3-hydroxyhippurate

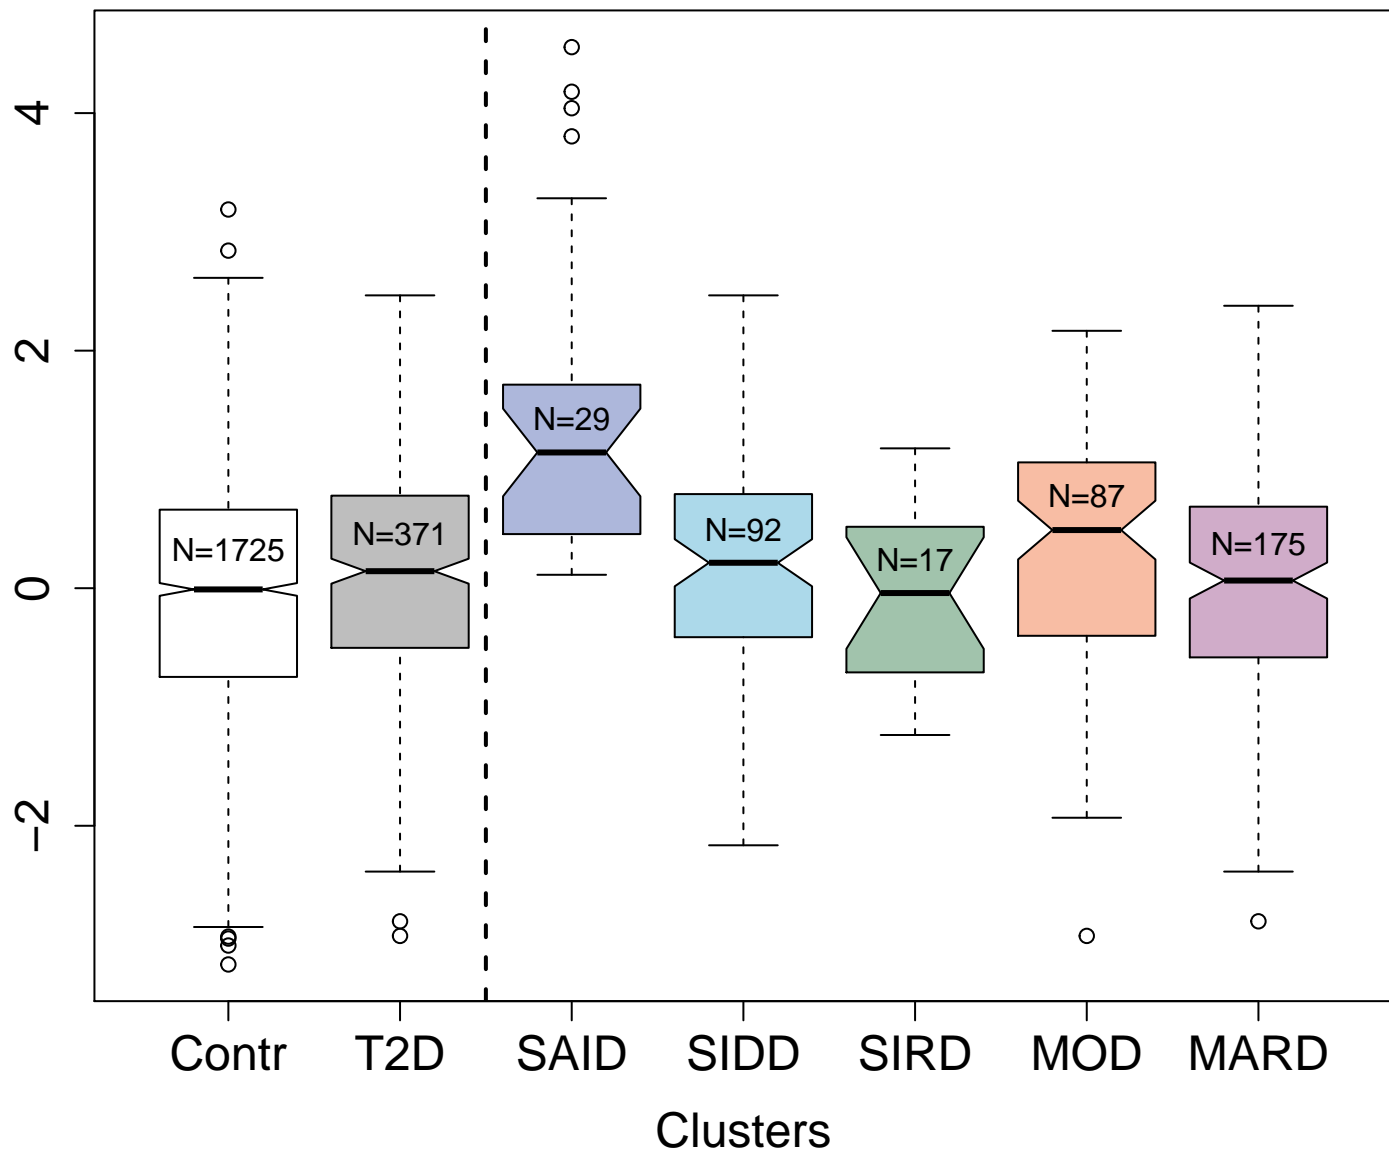

M2831 : adenosine 3',5'-cyclic monophosphate (cAMP)

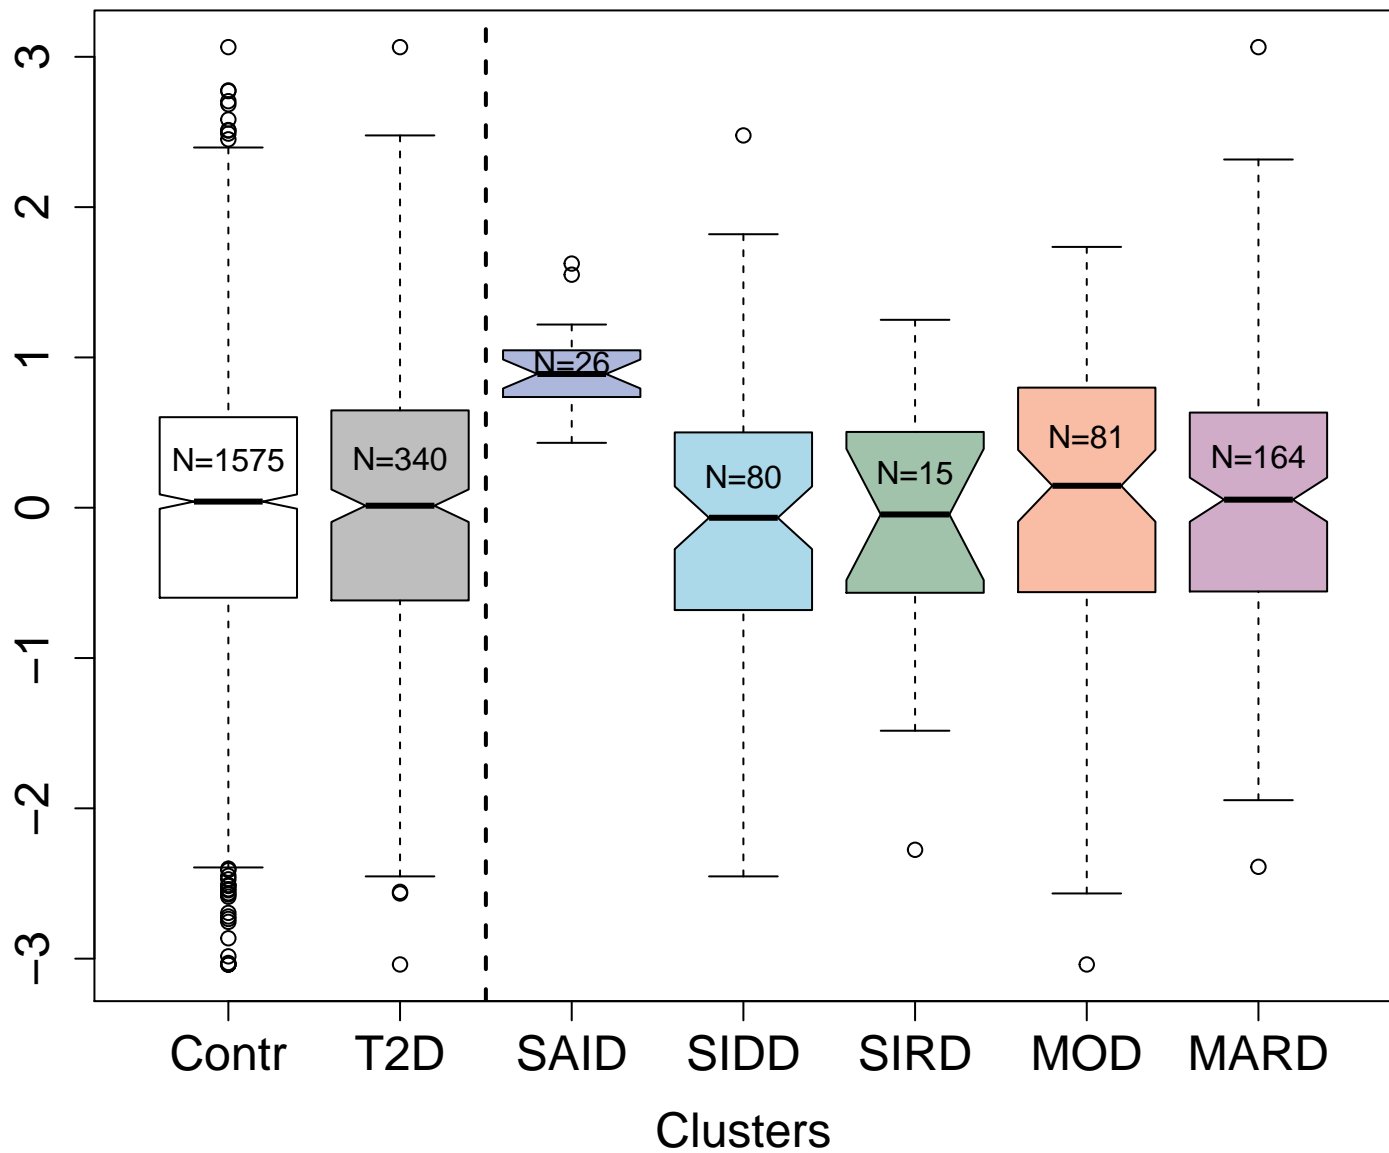

M1566 : 3-aminoisobutyrate

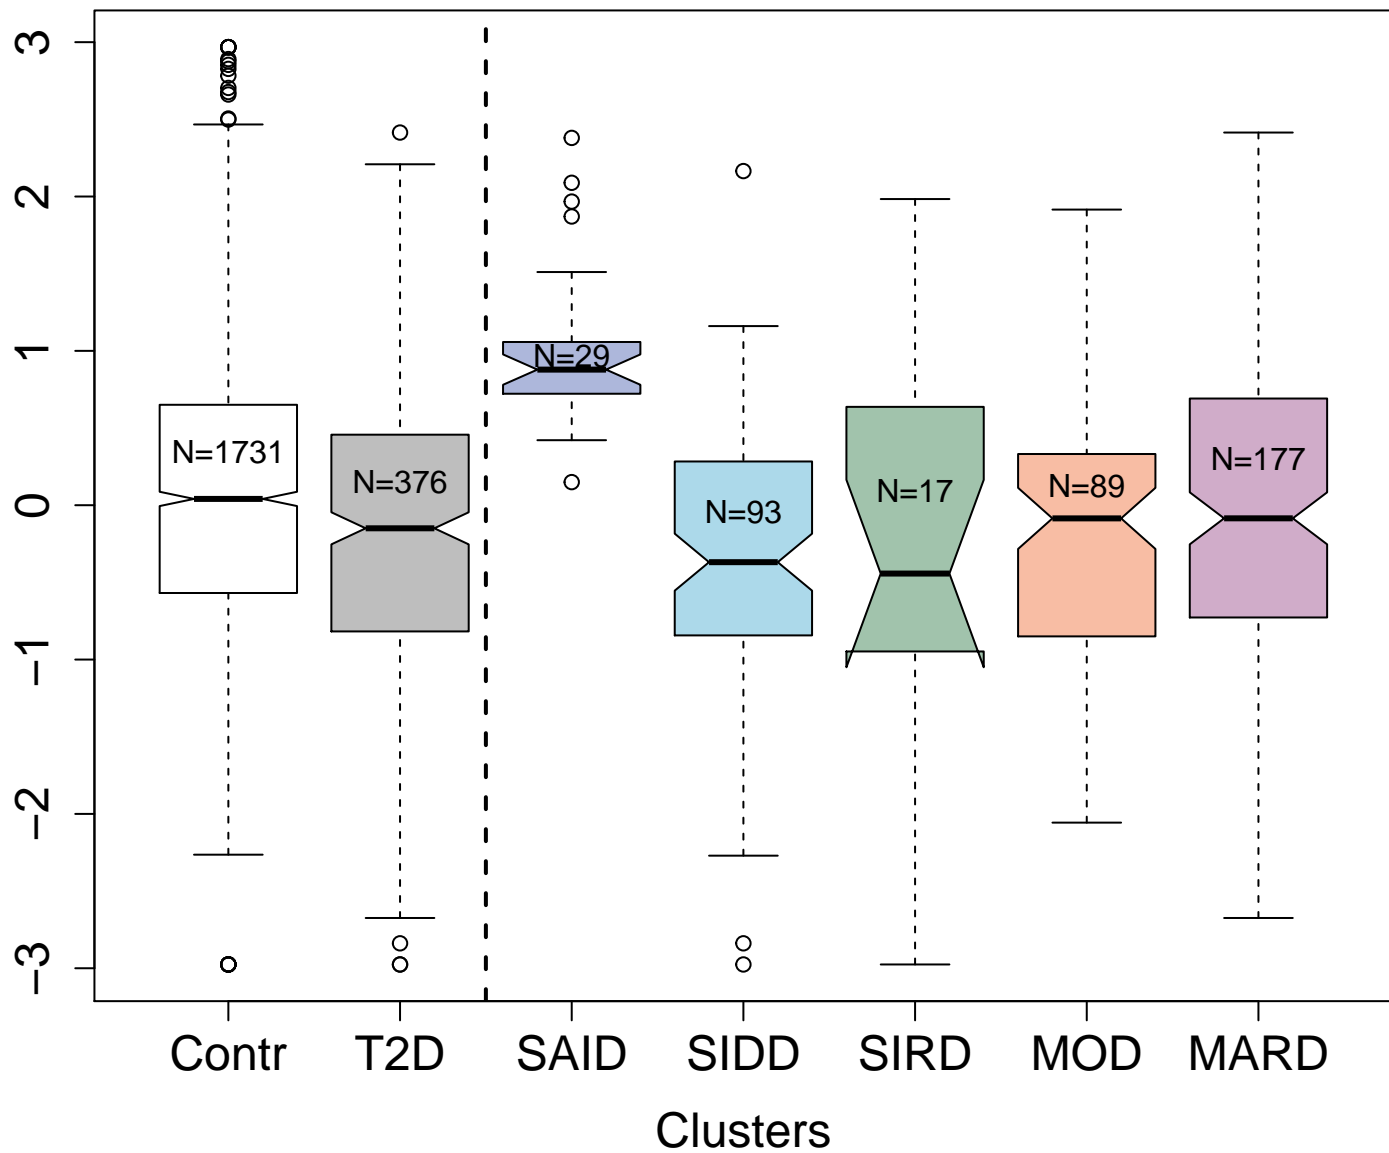

M2132 : citrulline

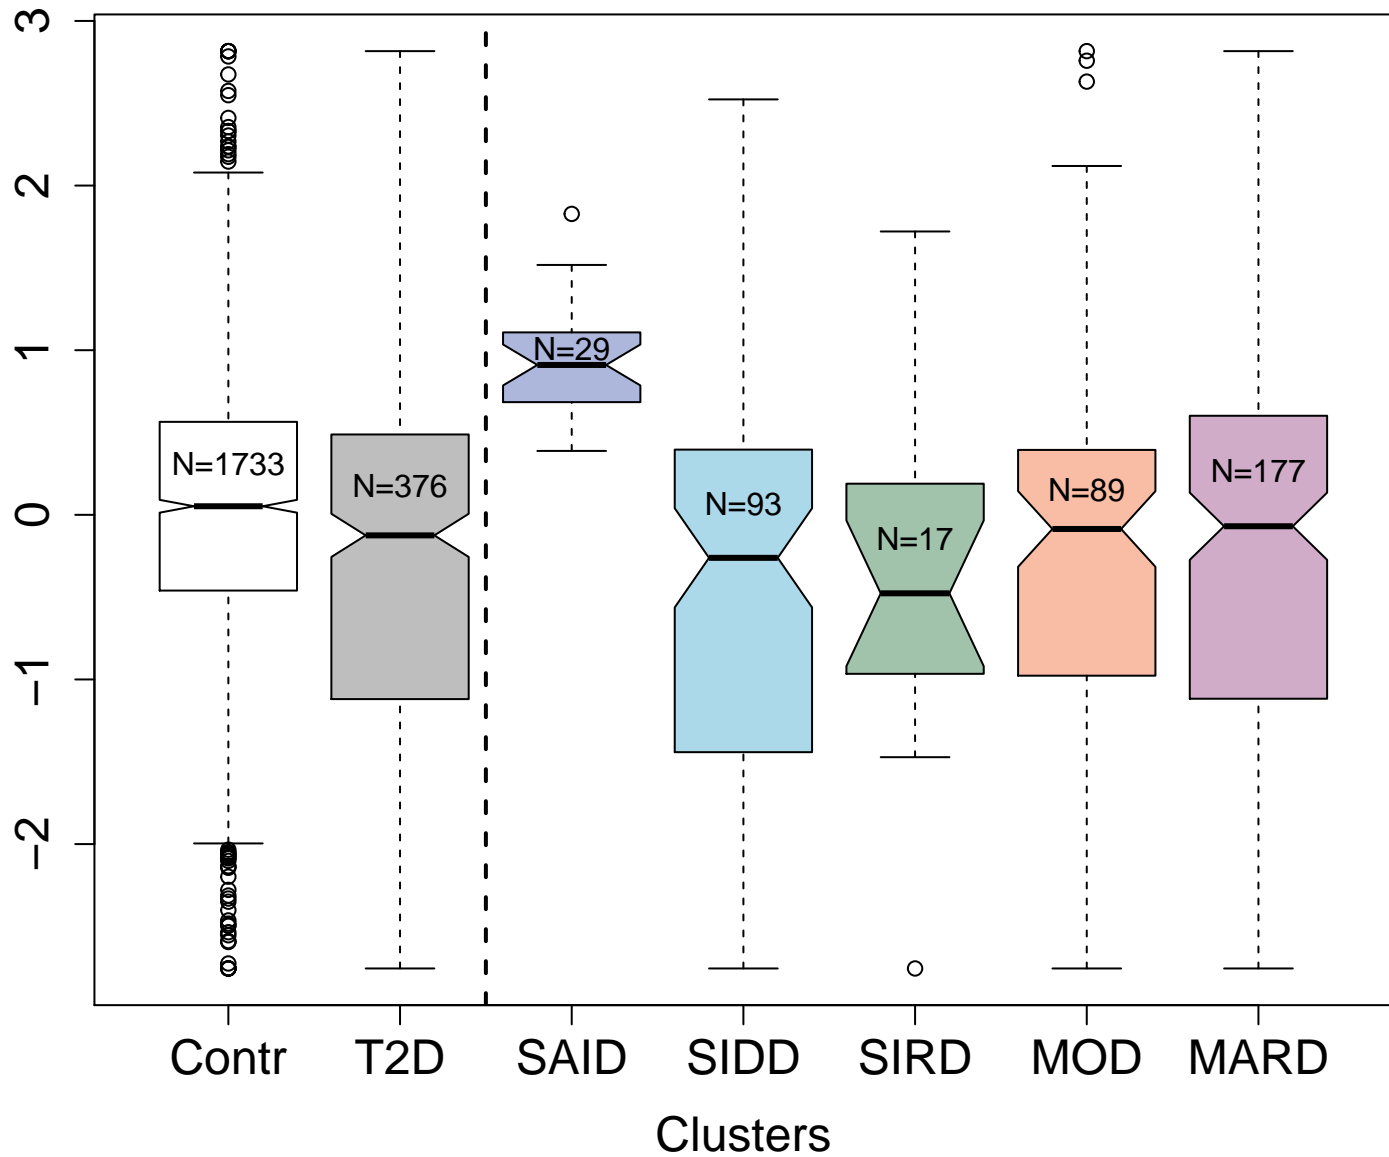

M47011: X - 21834

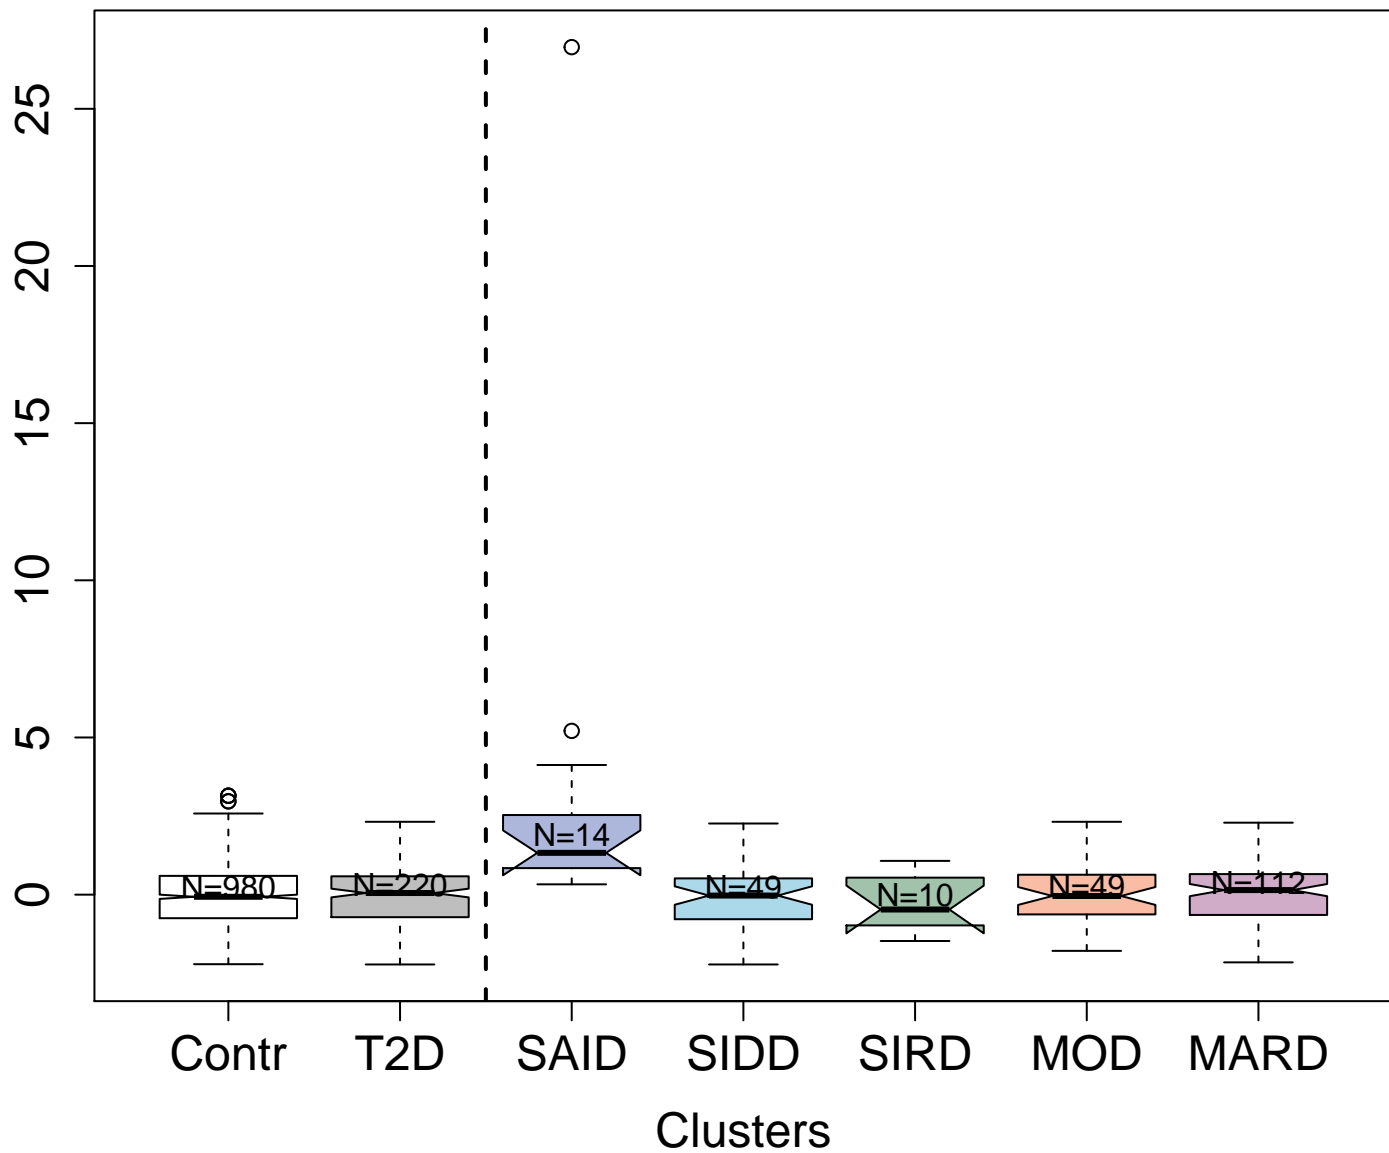

M47673 : X - 19299

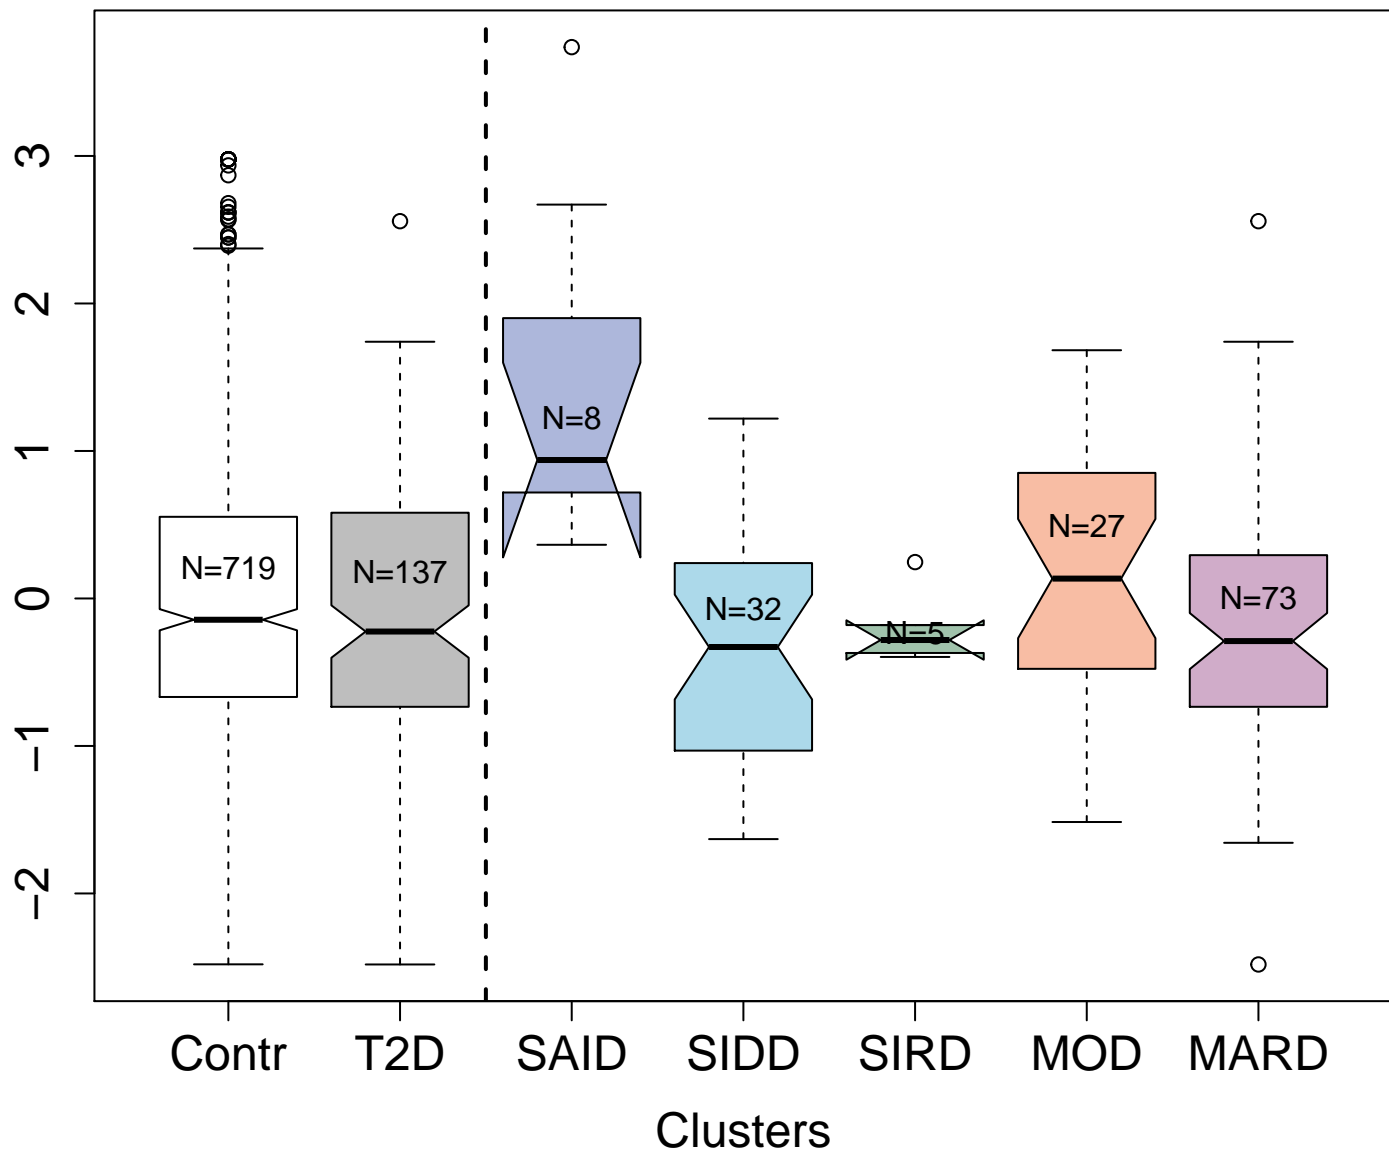

M48493 : sphingomyelin (d18:1/22:1, d18:2/22:0, d16:1/24:1)

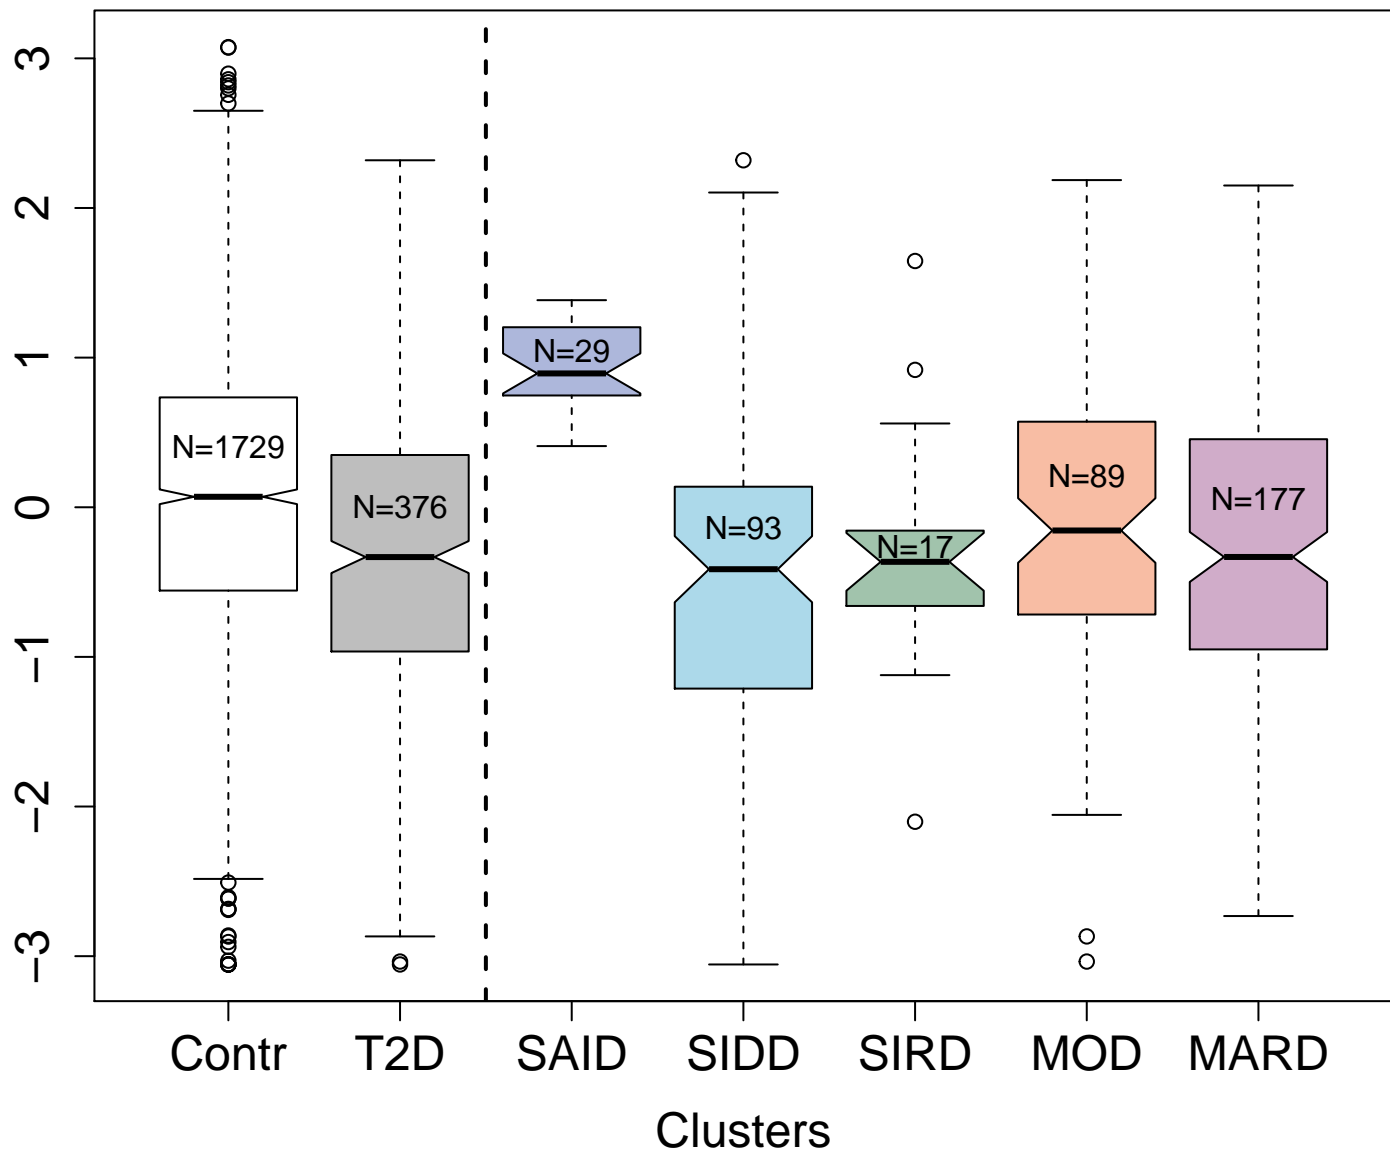

M15716 : imidazole lactate

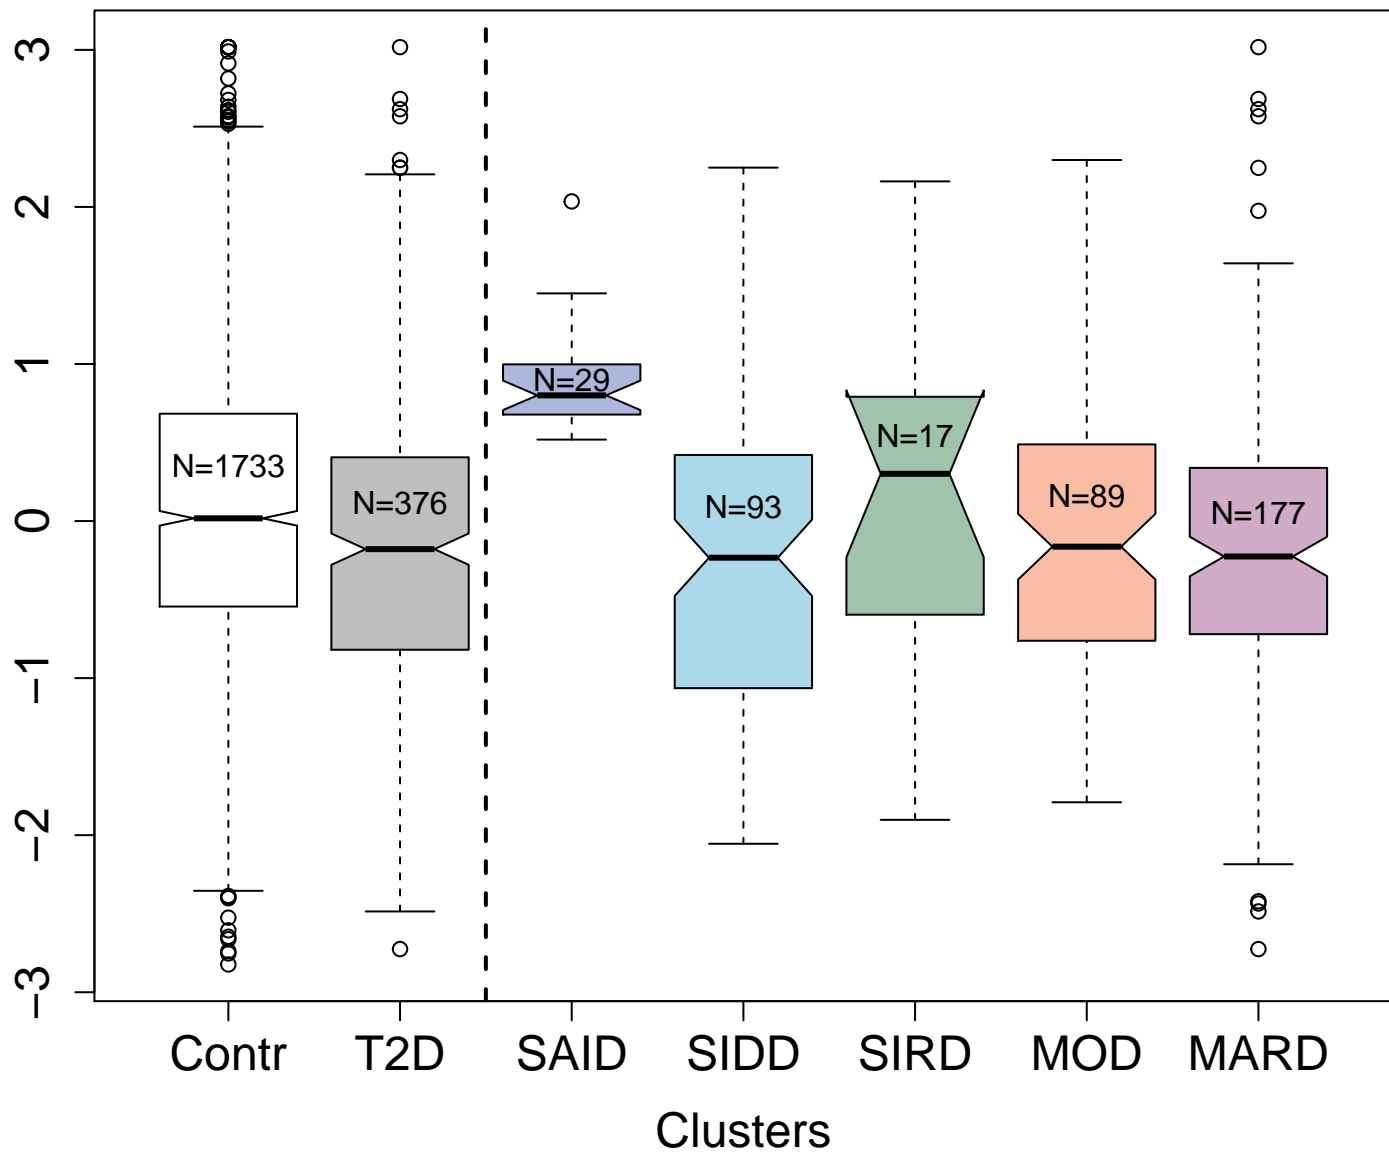



M47872 : X - 17340

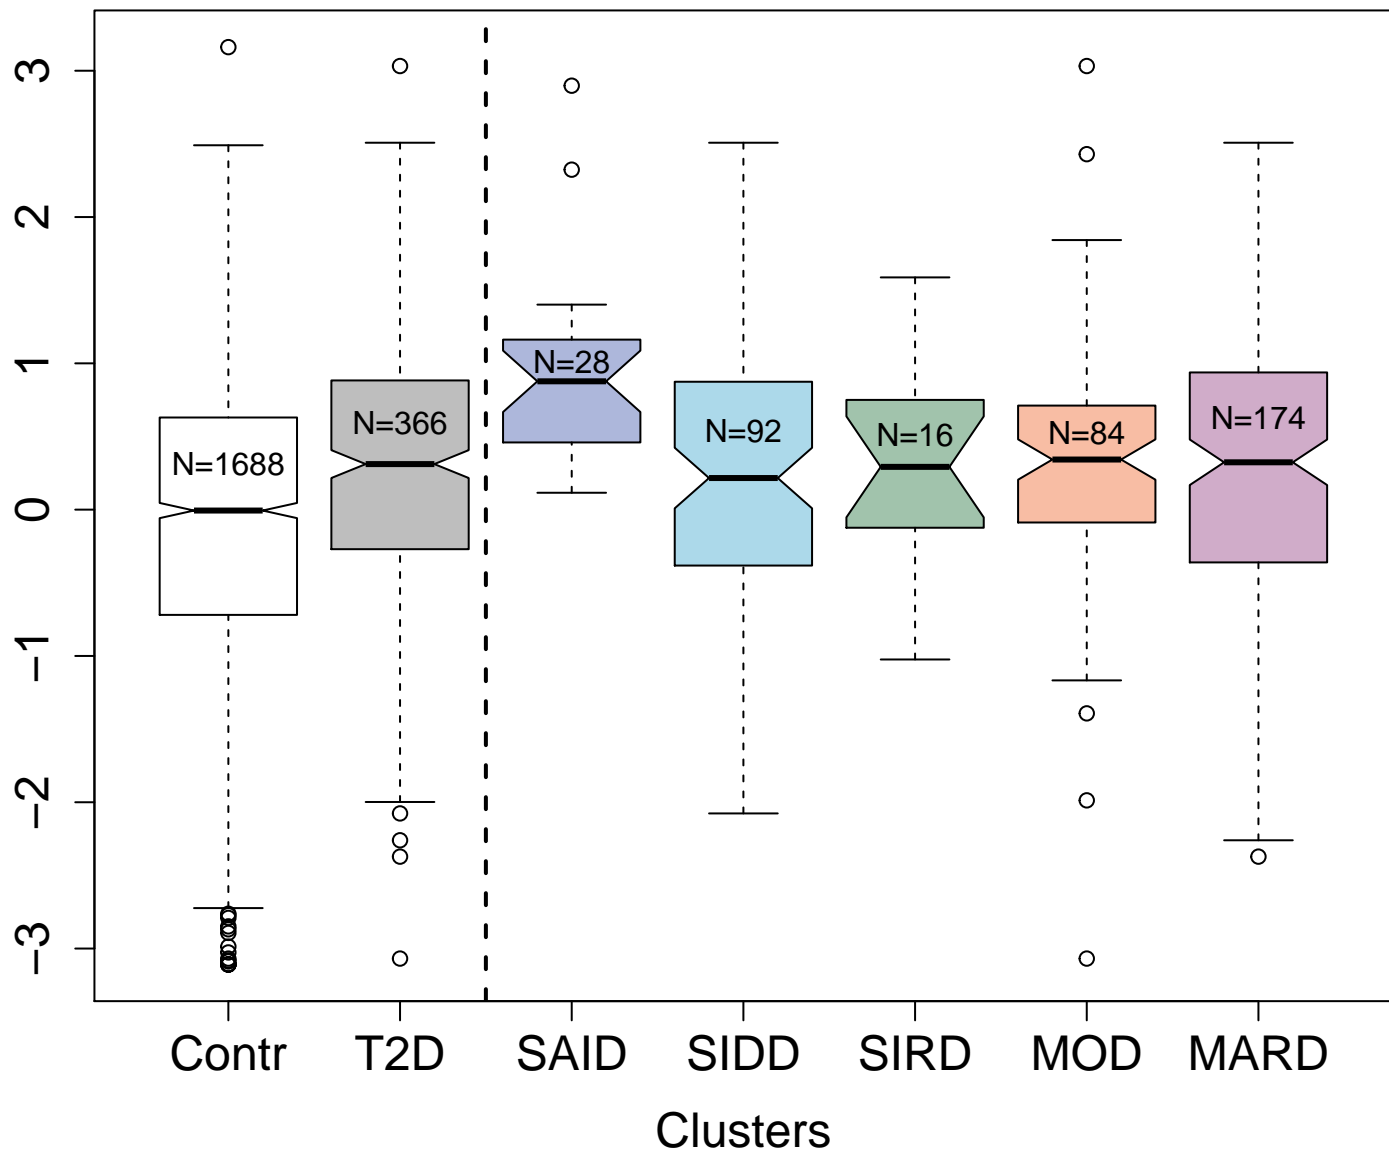

M21025 : iminodiacetate (IDA)

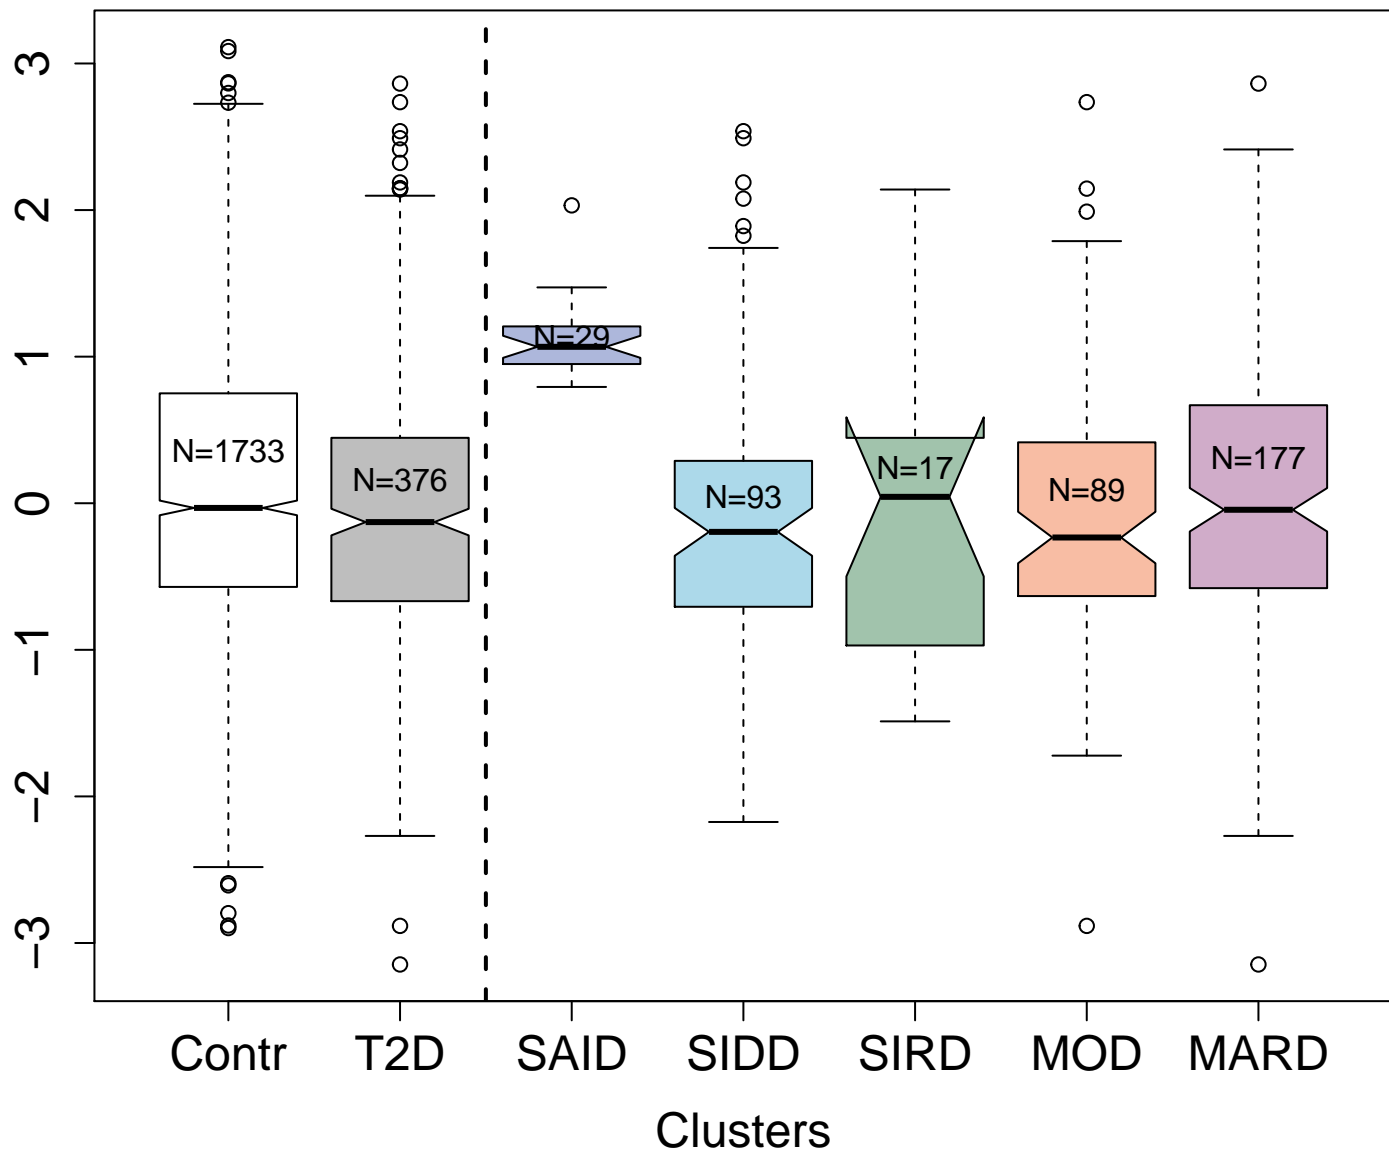

M43761 : 2-aminoheptanoate

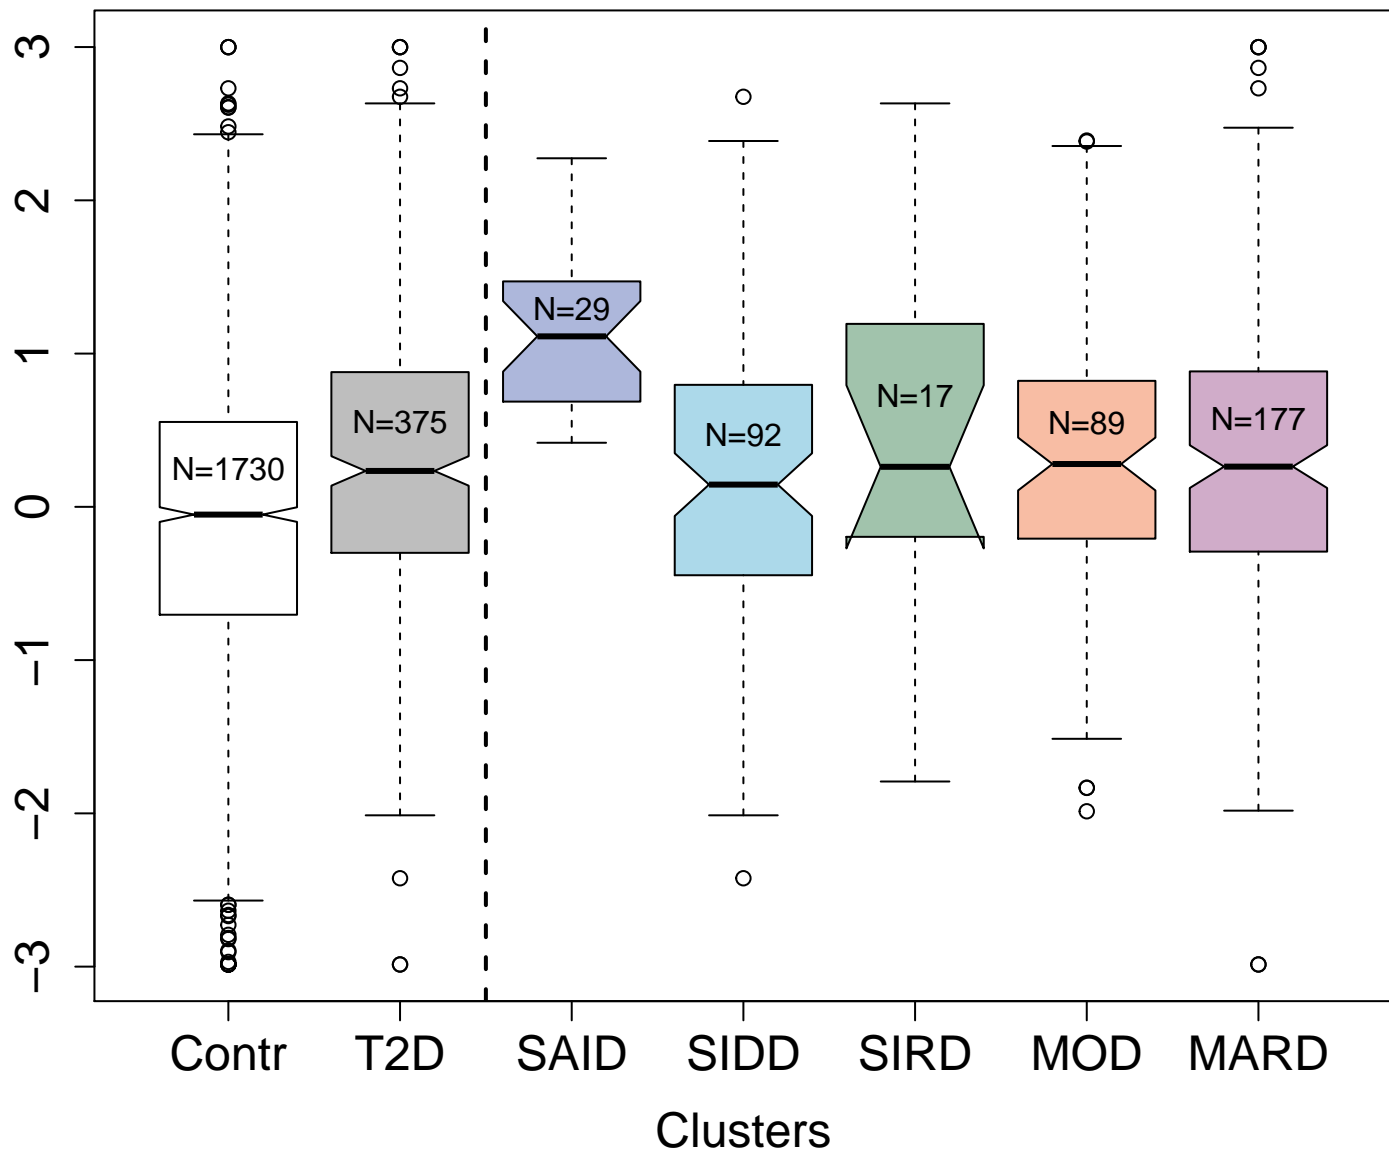

M37183 : 5alpha-androstan-3alpha,17alpha-diol monosulfate

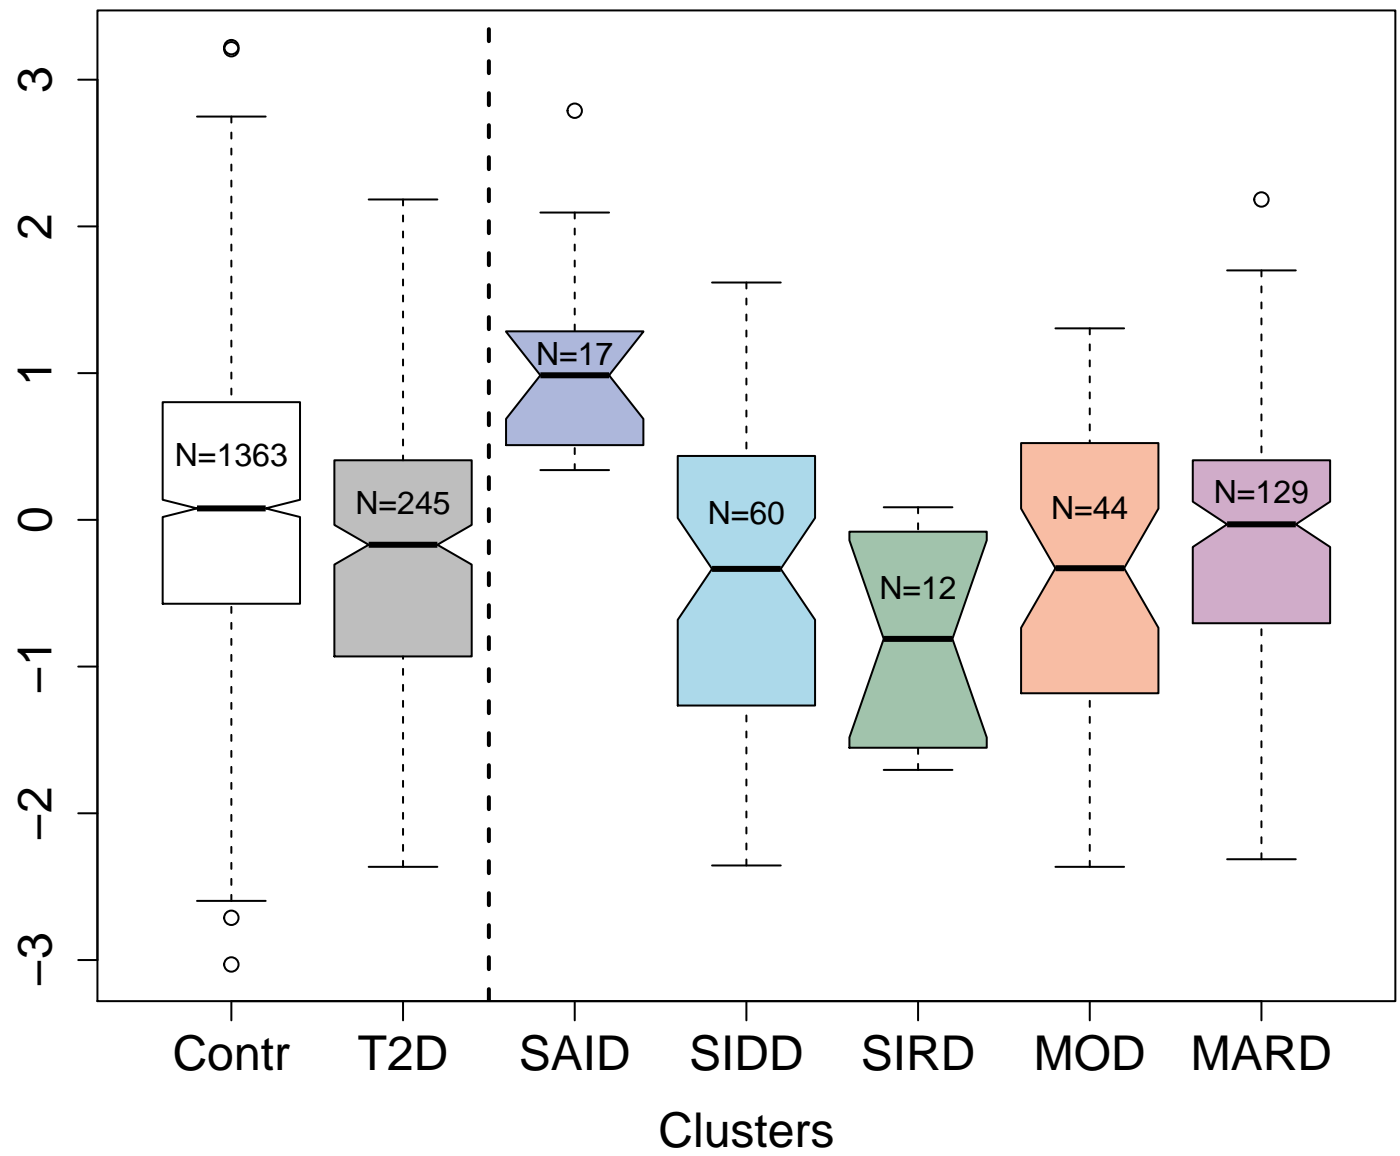

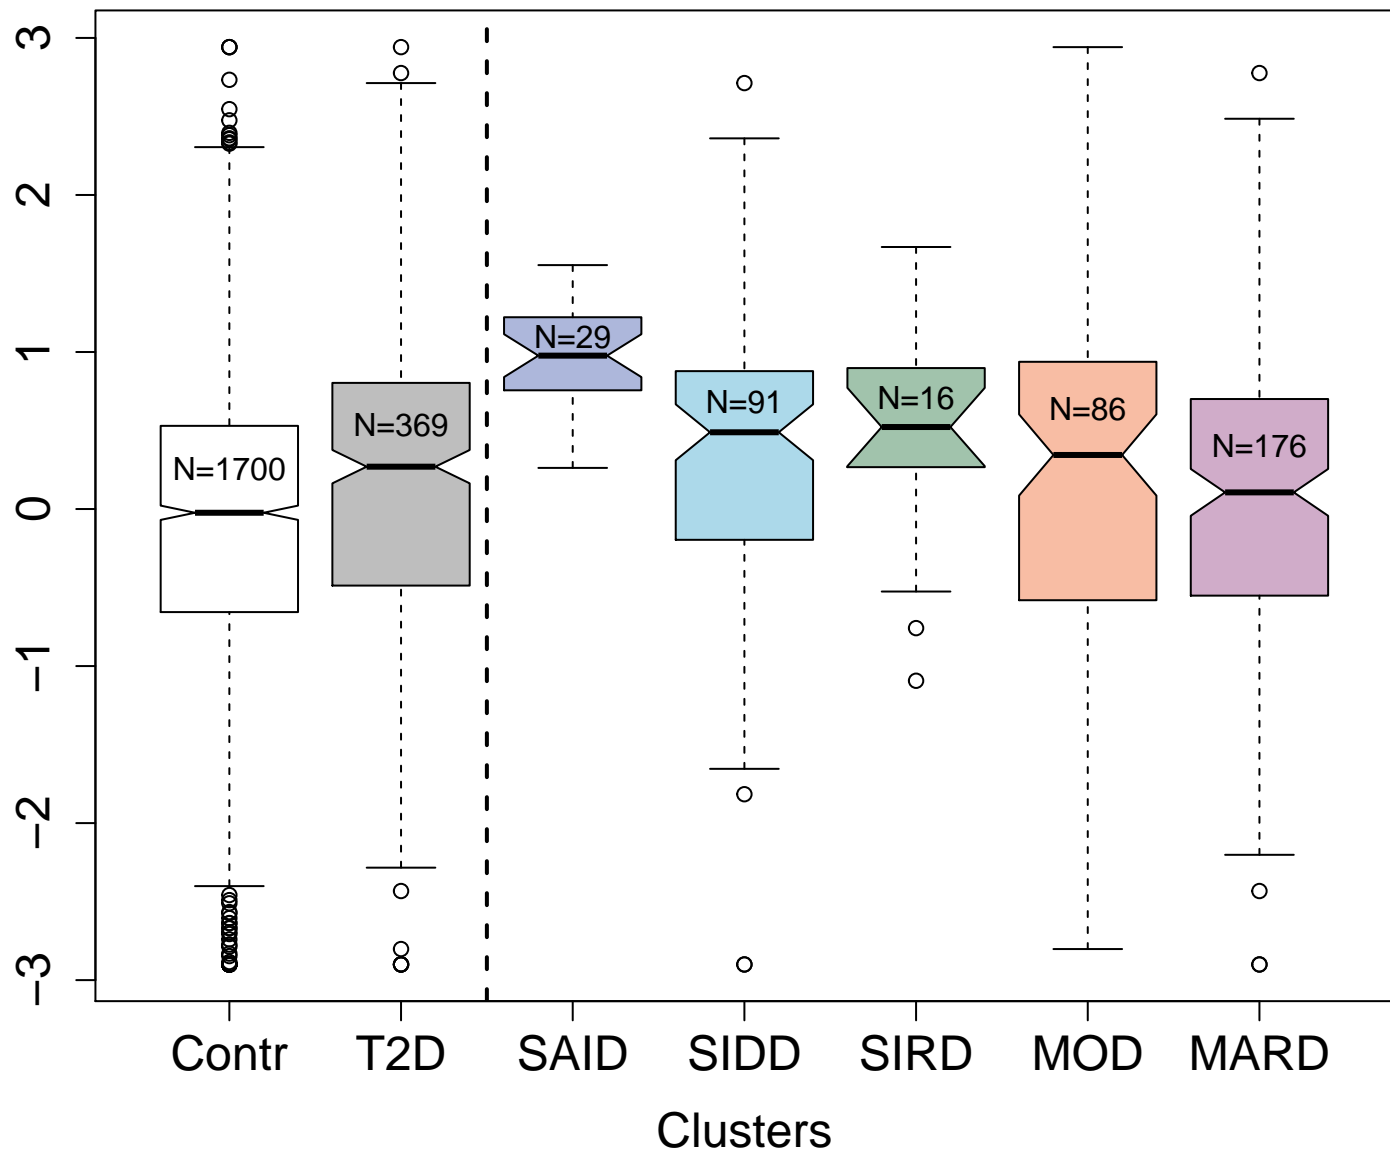

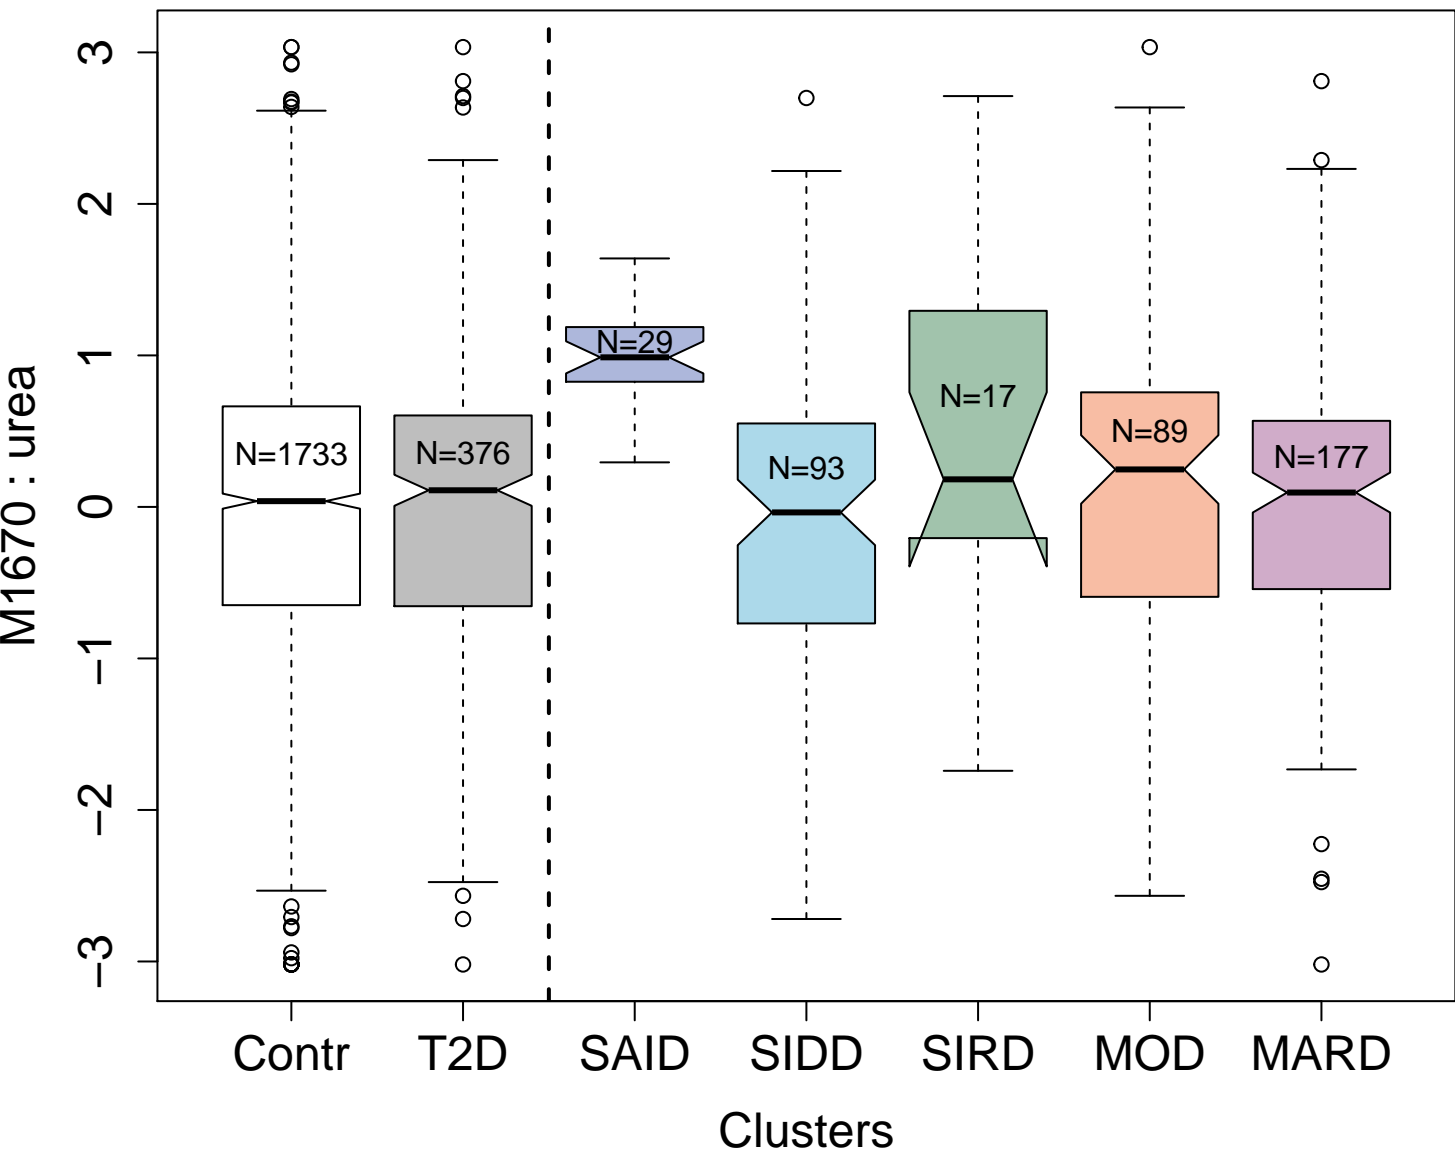

M43400 : 2-piperidinone

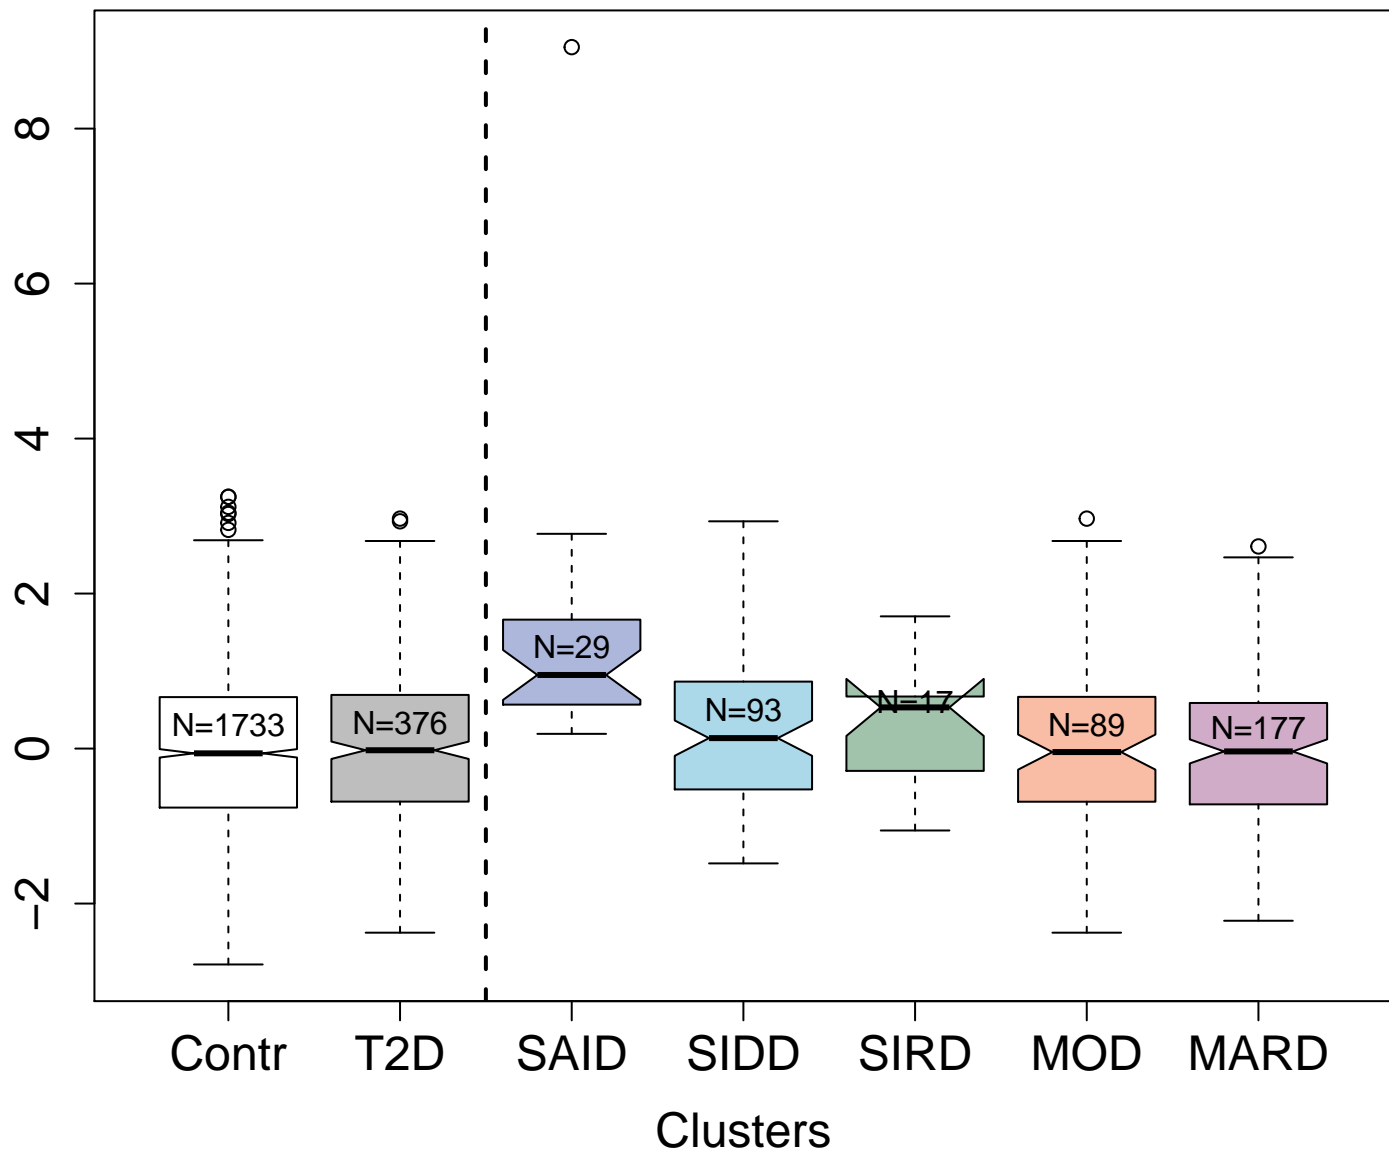

M1559 : 5,6-dihydrouracil

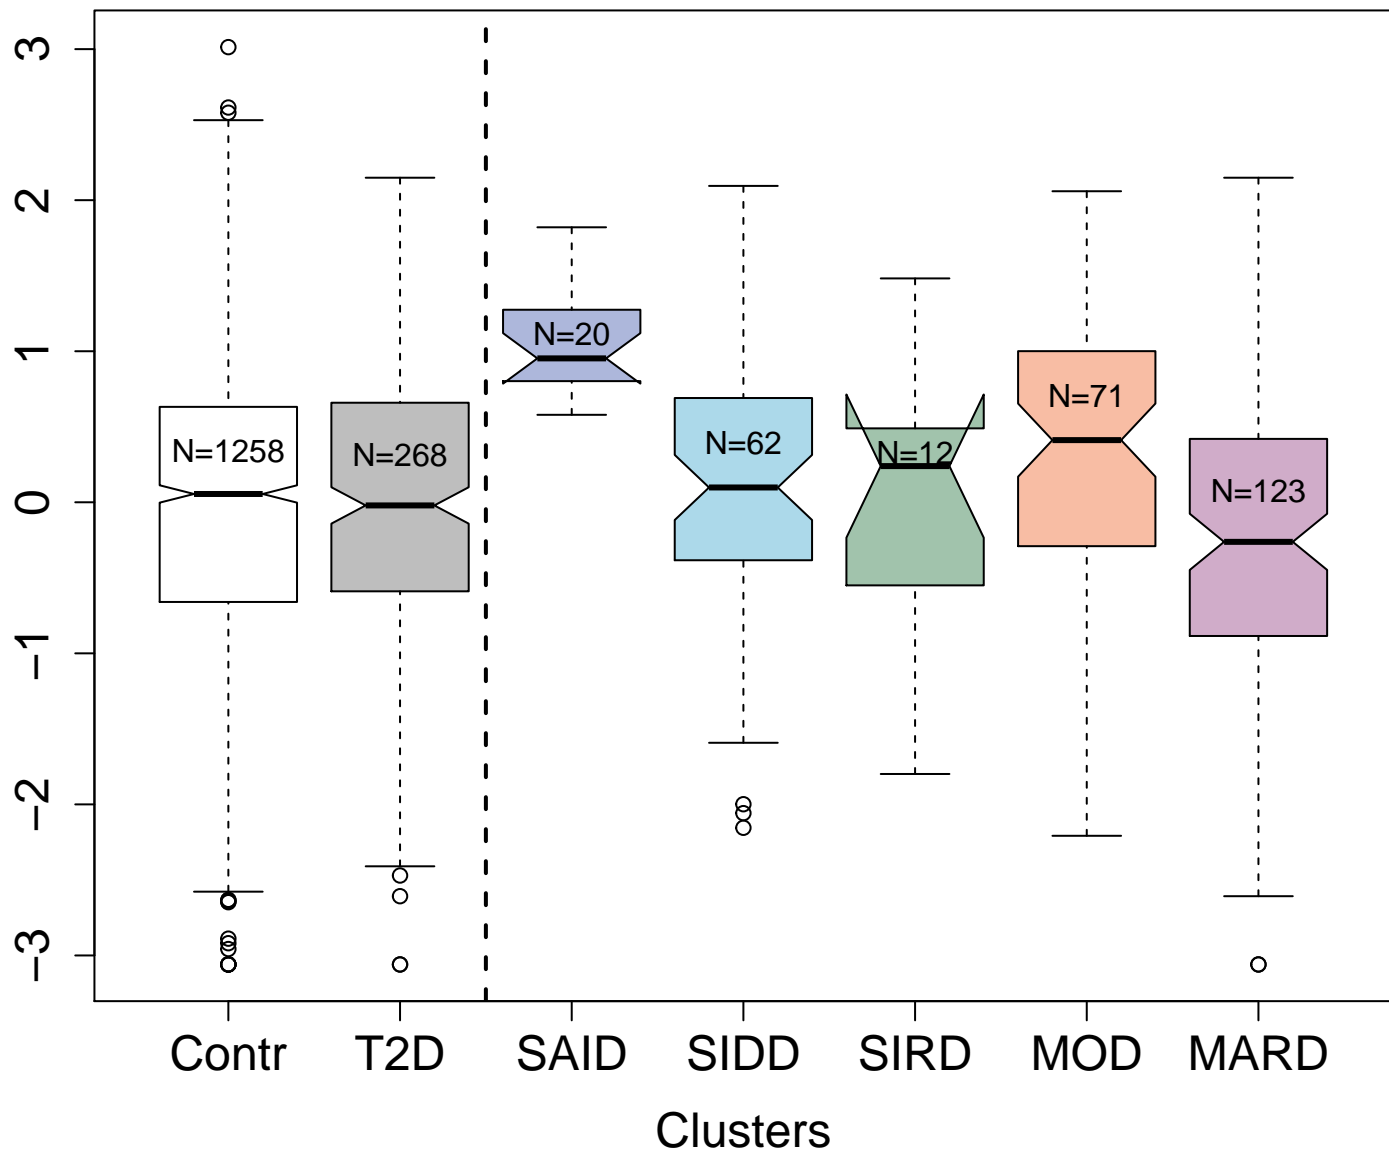



M52611 : 1-stearoyl-2-docosahexaenoyl-GPC (18:0/22:6)

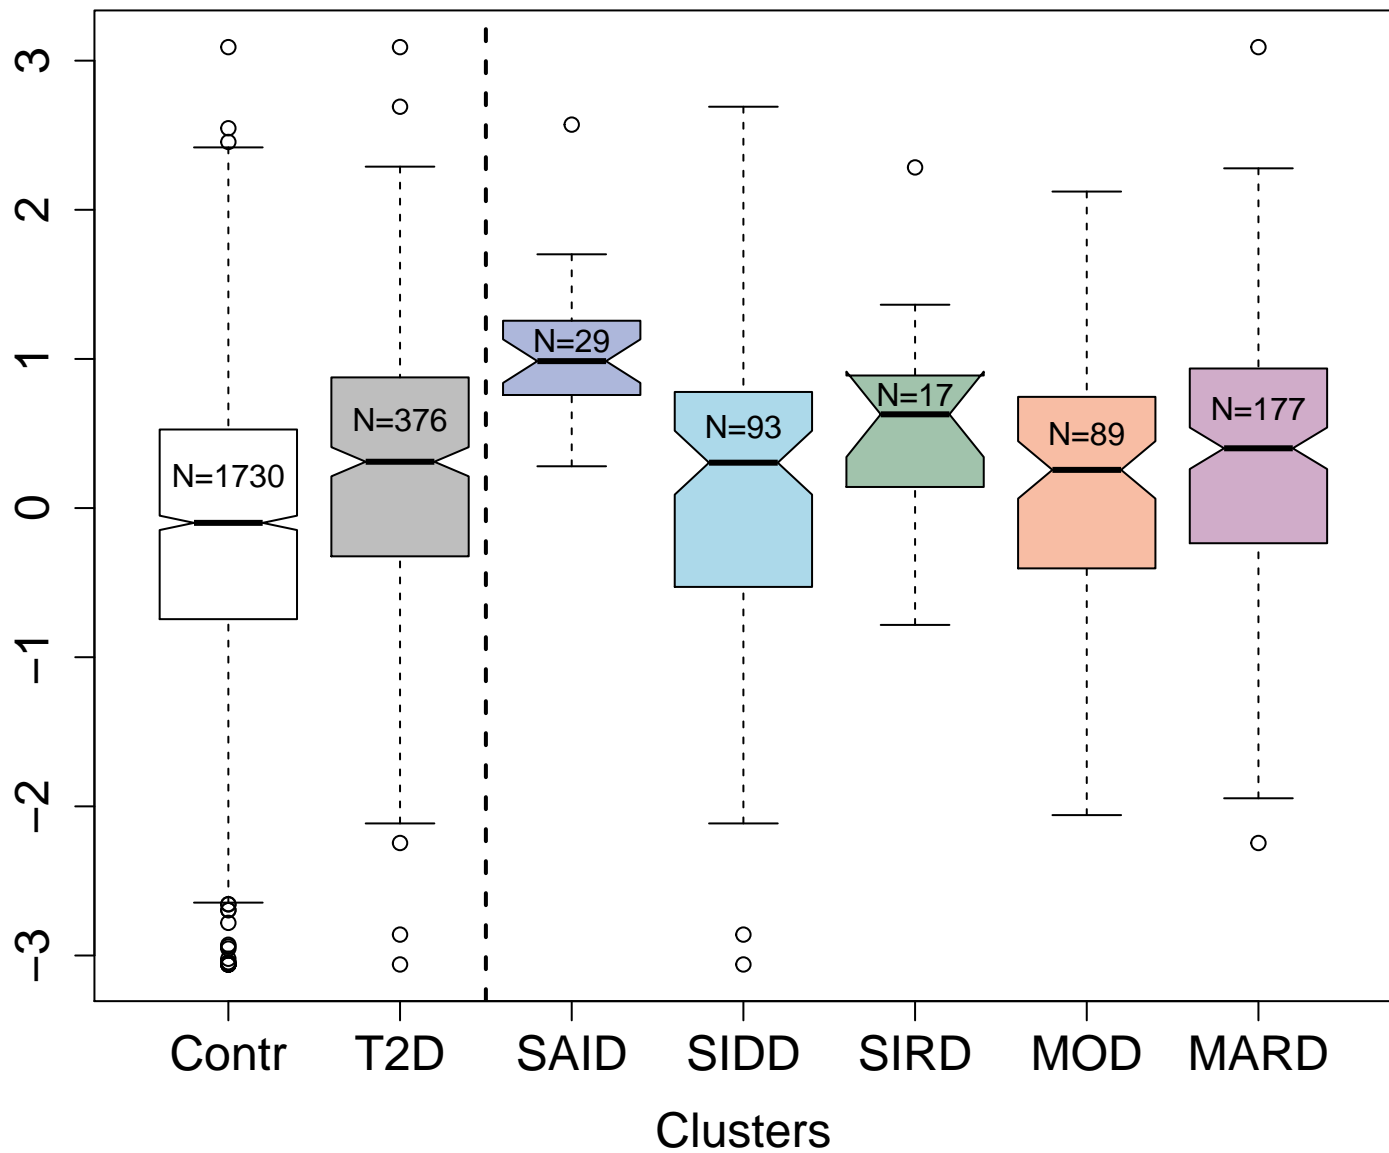

M63227 : 3-hydroxy-2-methylpyridine sulfate

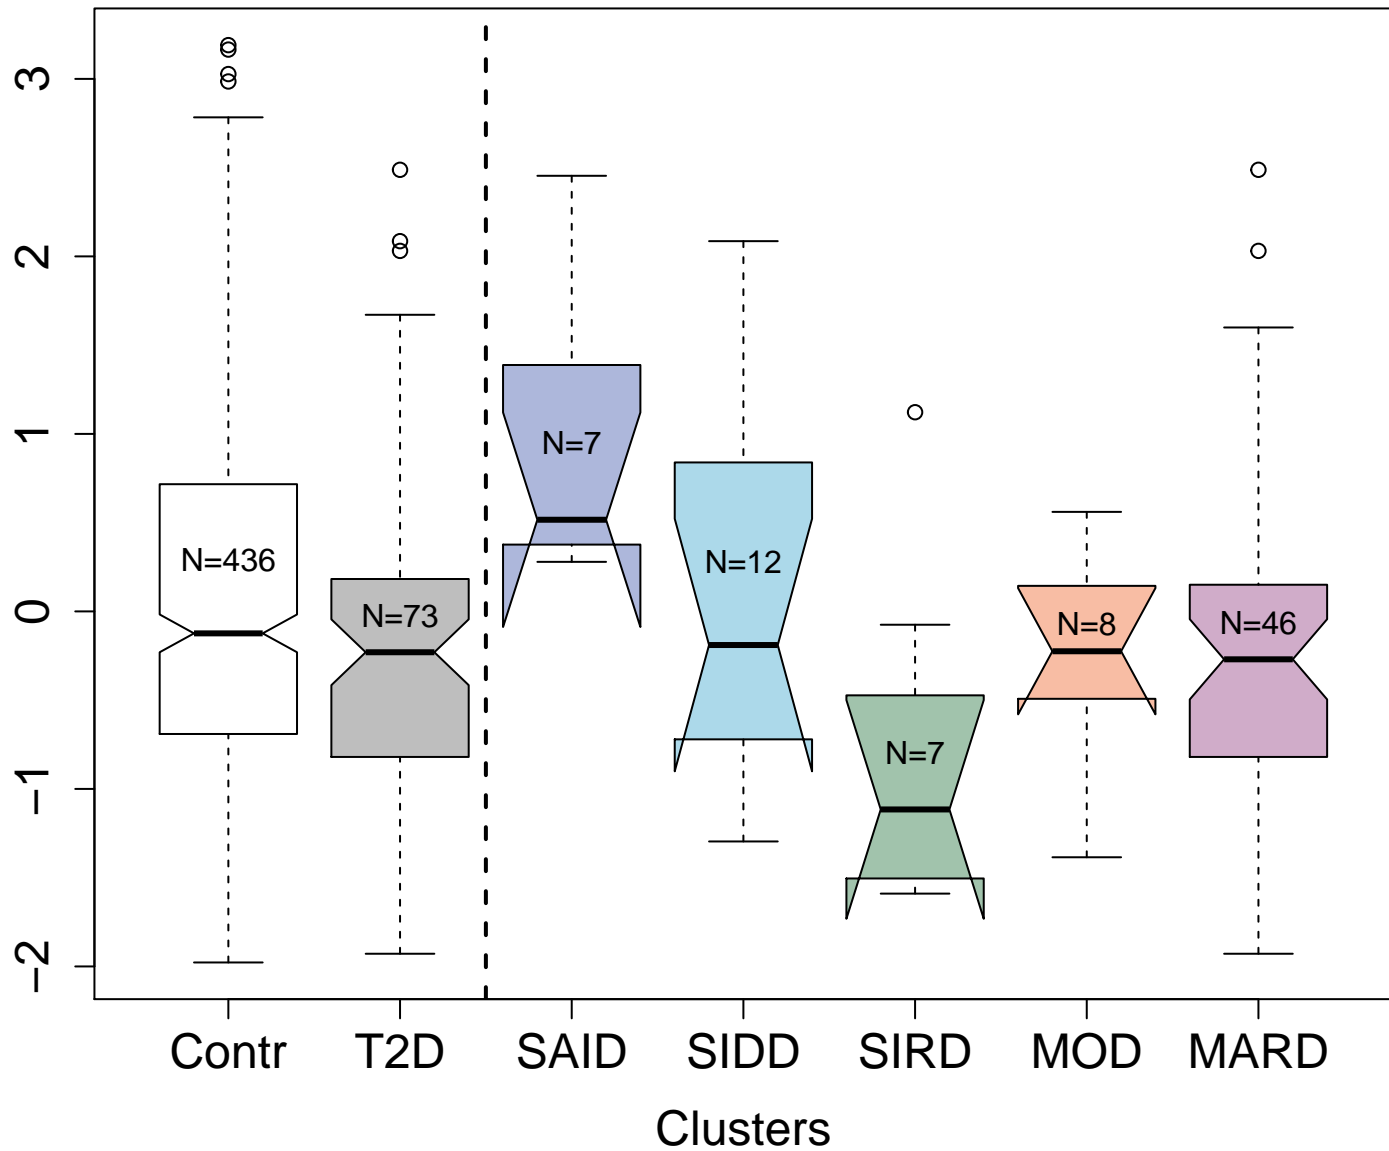

M48698 : 6-hydroxyindole sulfate

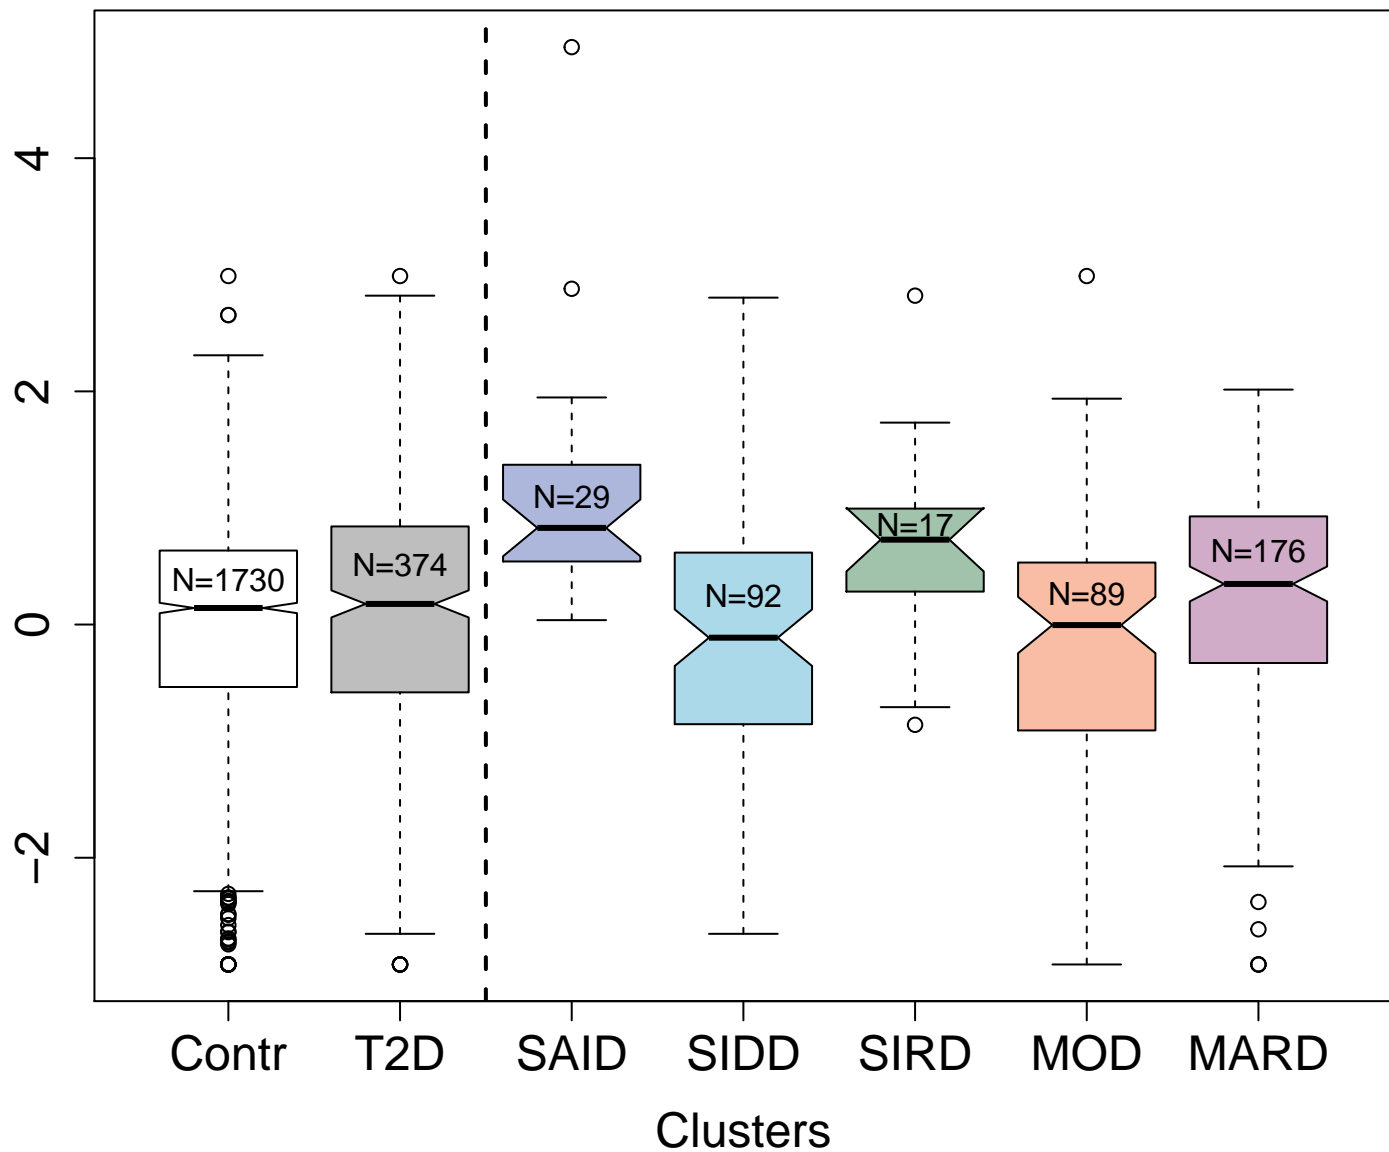

M62946 : 1-methyl-5-imidazoleacetate

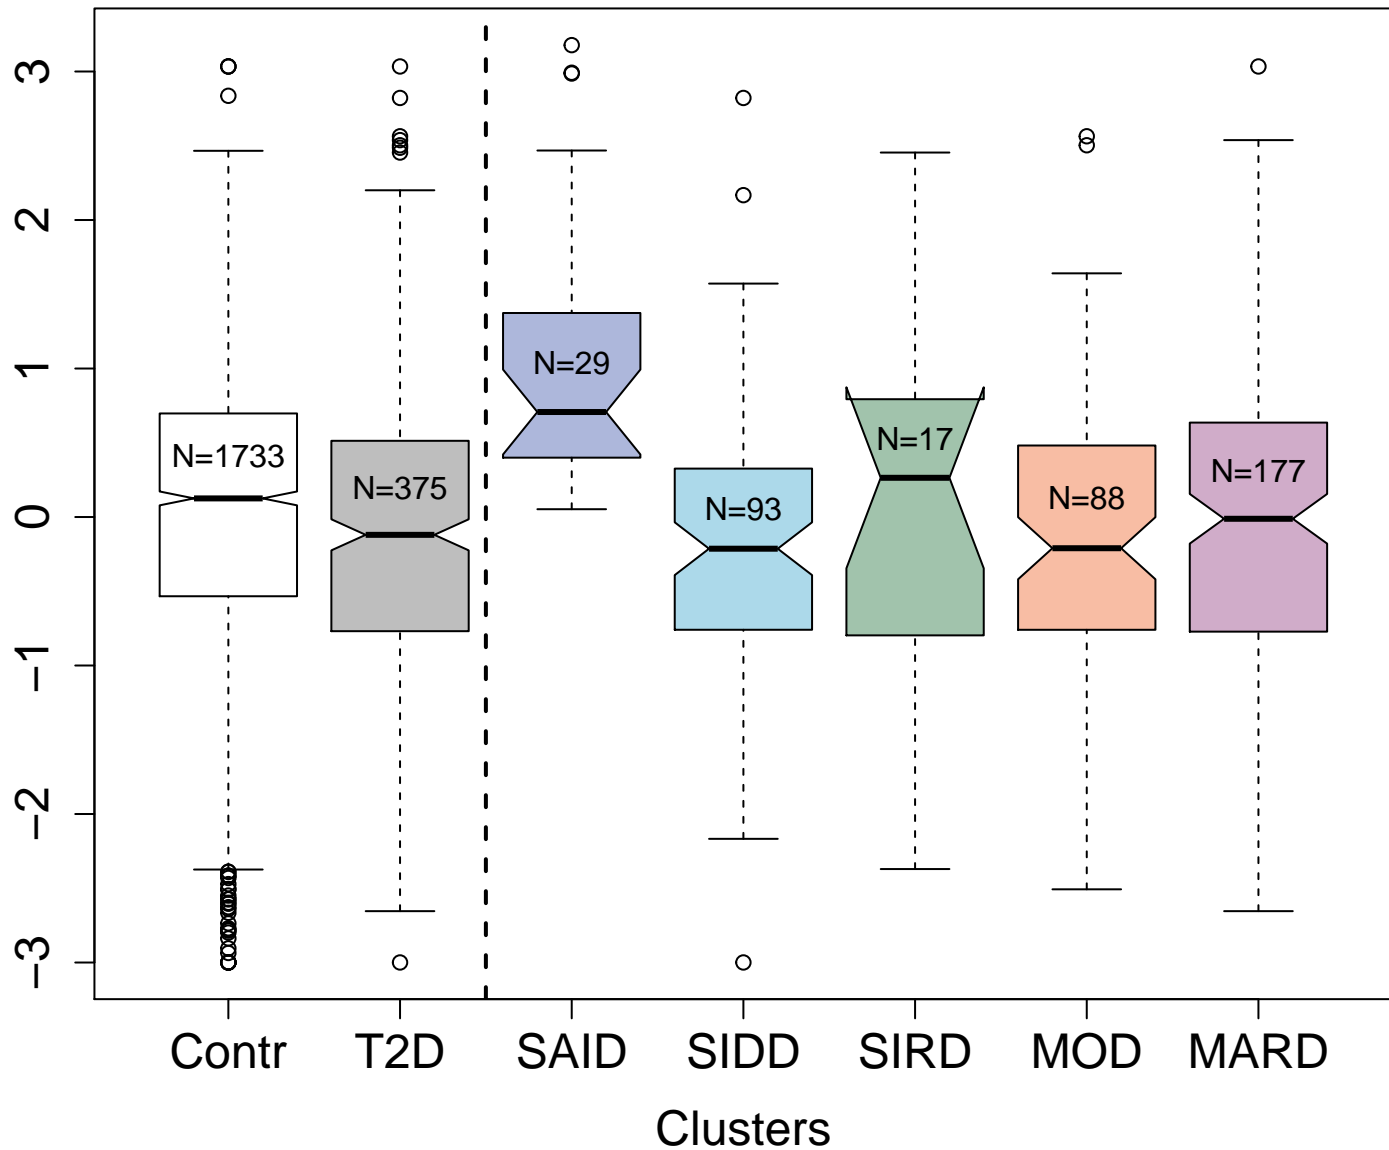

M38768 : (14 or 15)-methylpalmitate (a17:0 or i17:0)

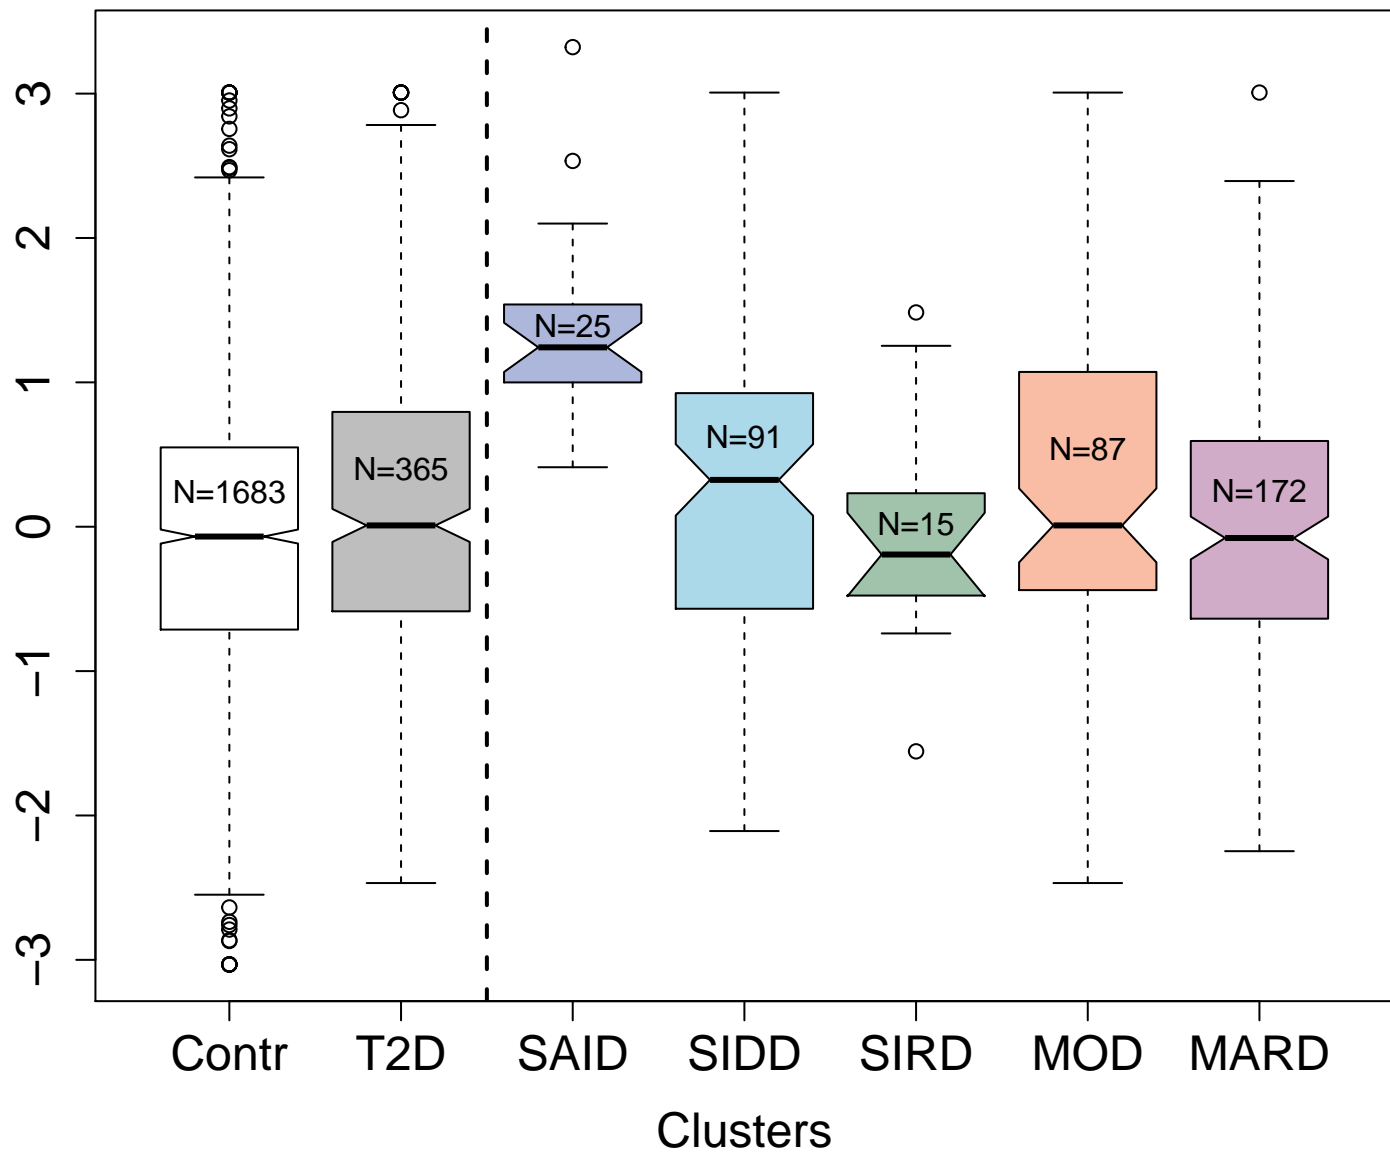

M52602 : 2'-deoxyuridine

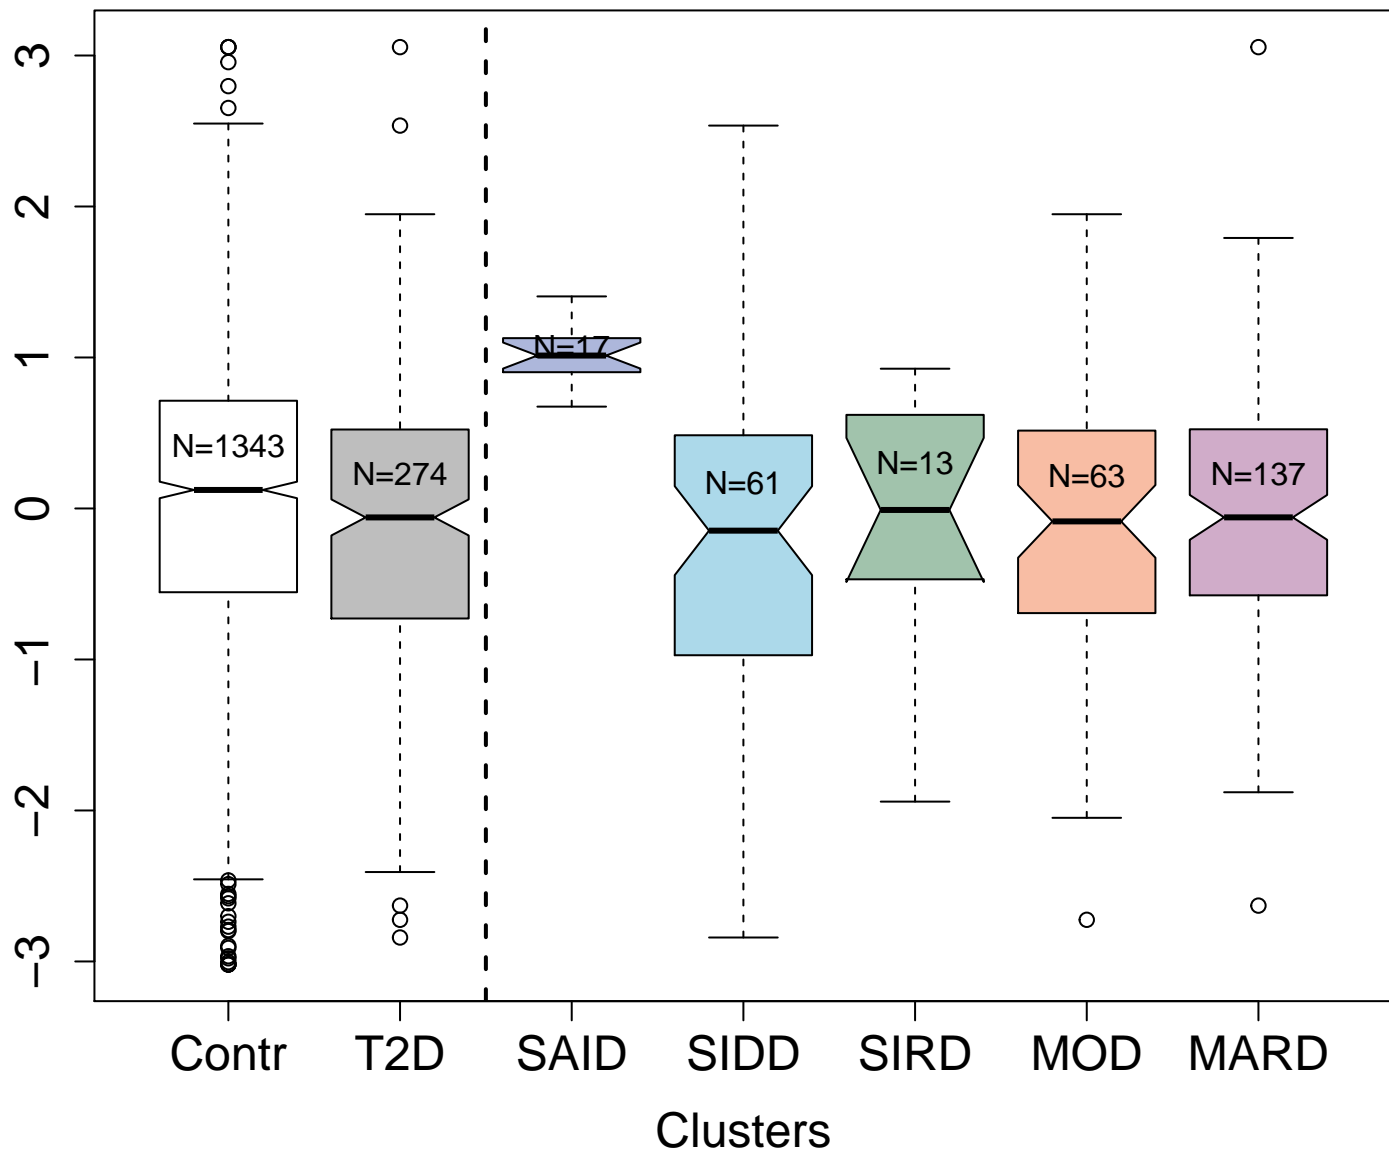

M57754 : X - 24970

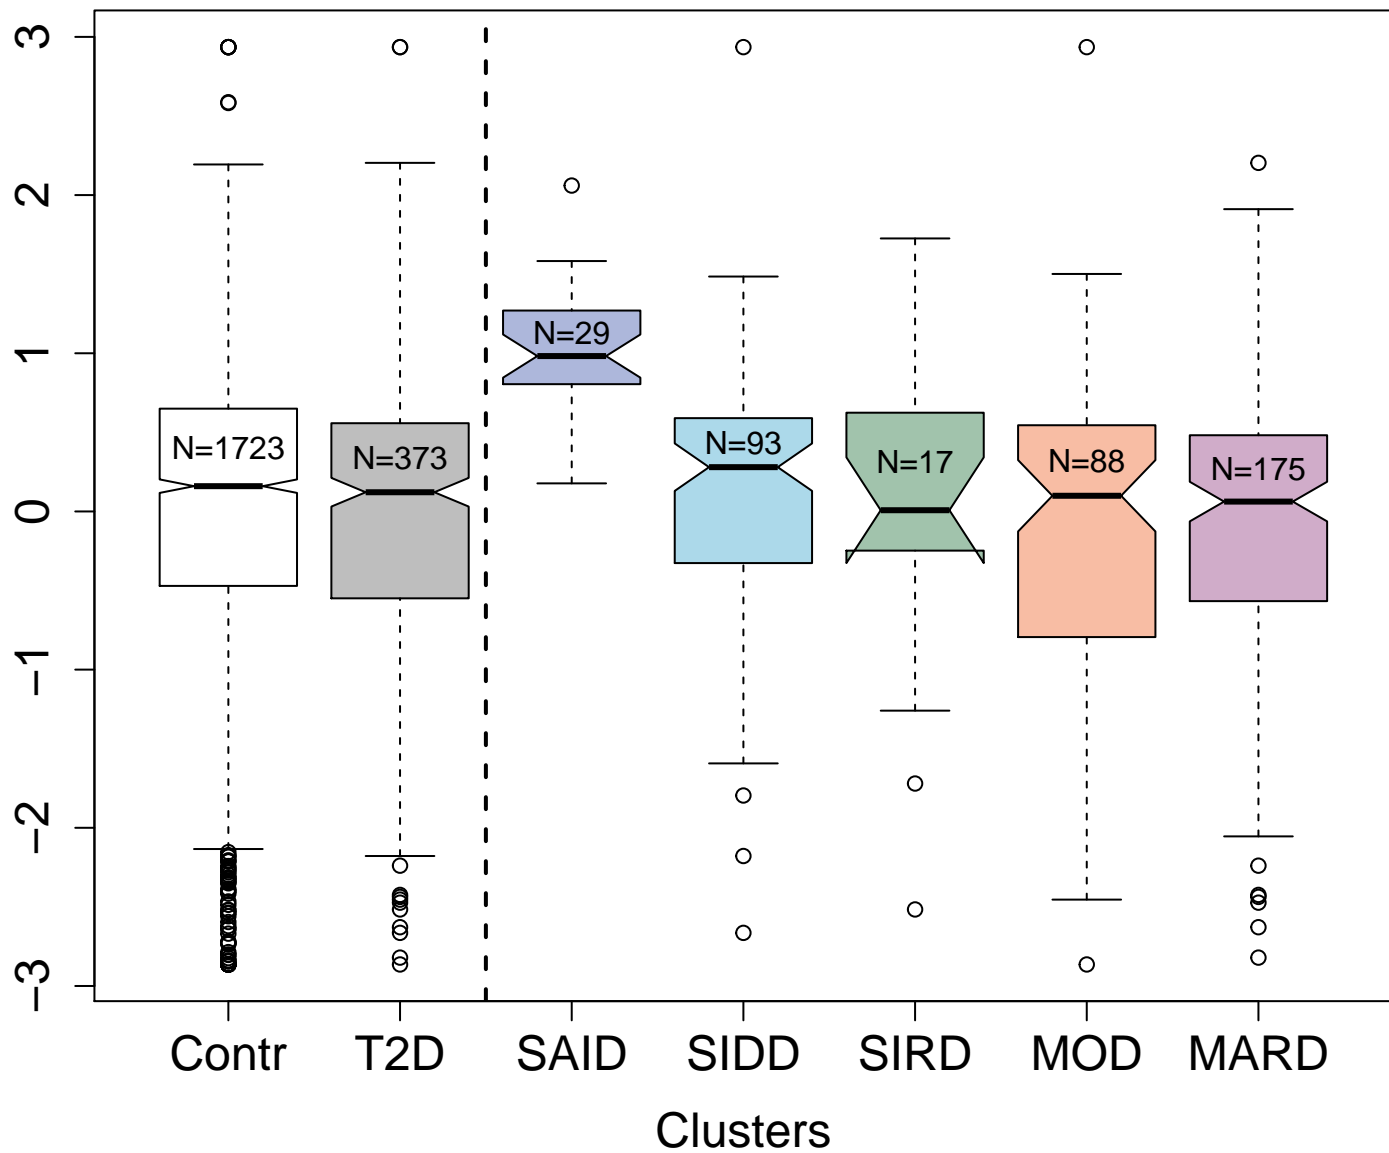

M38170 : pregnenolone sulfate

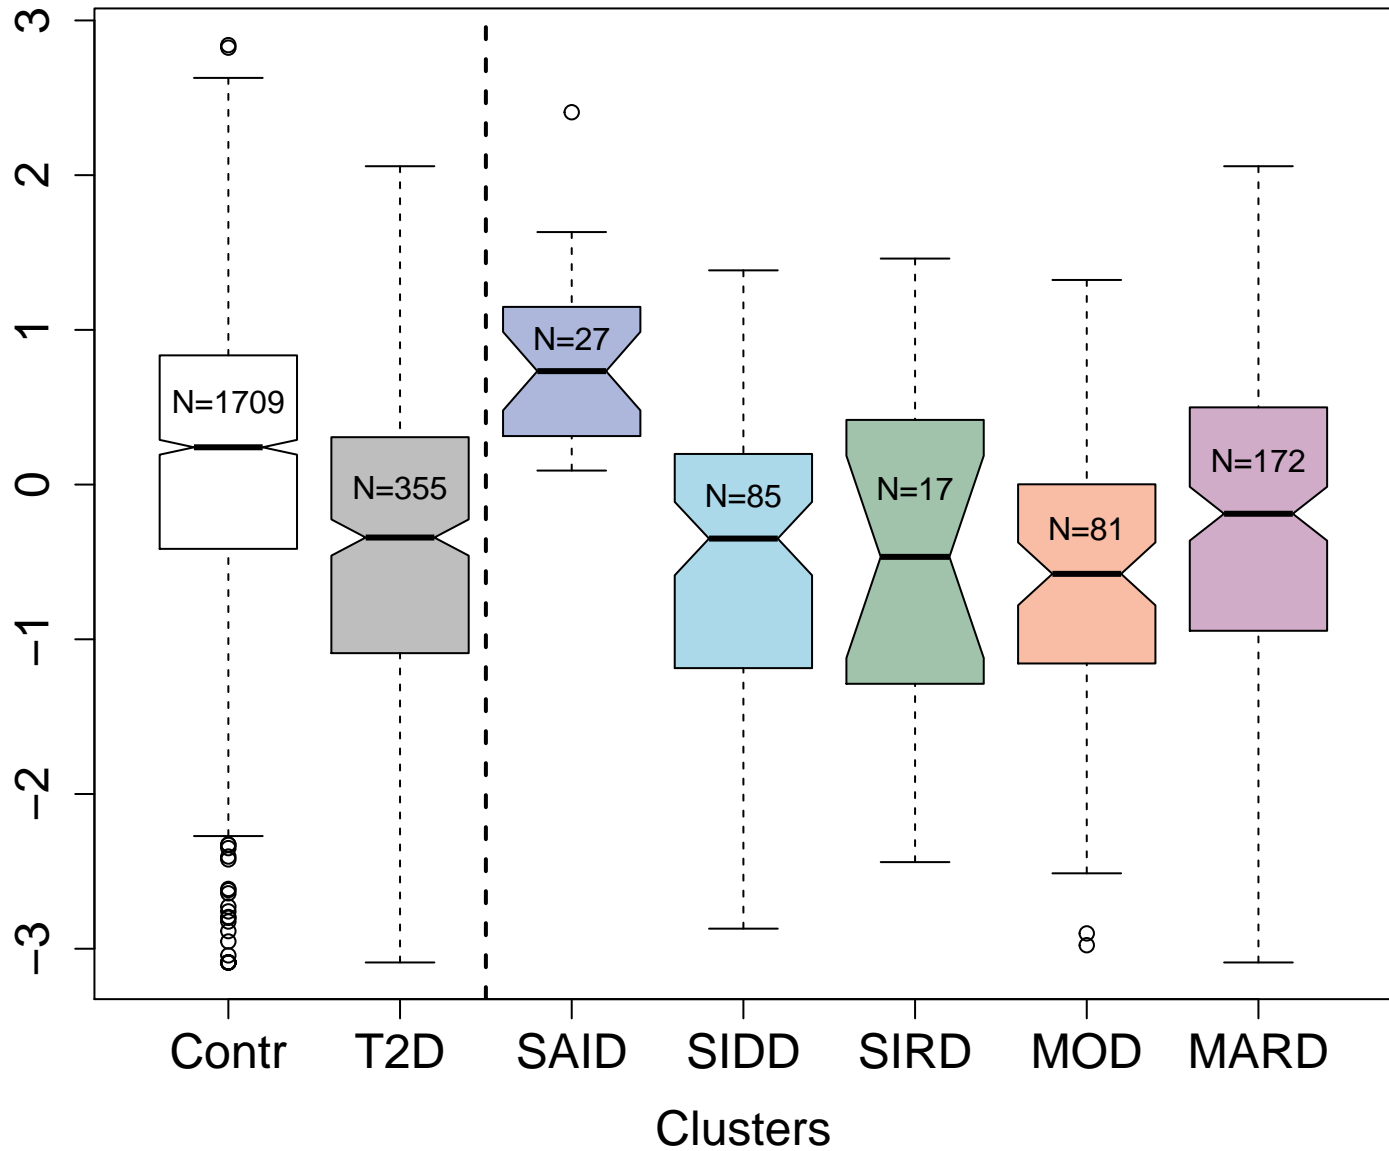



M48025 : X - 17685

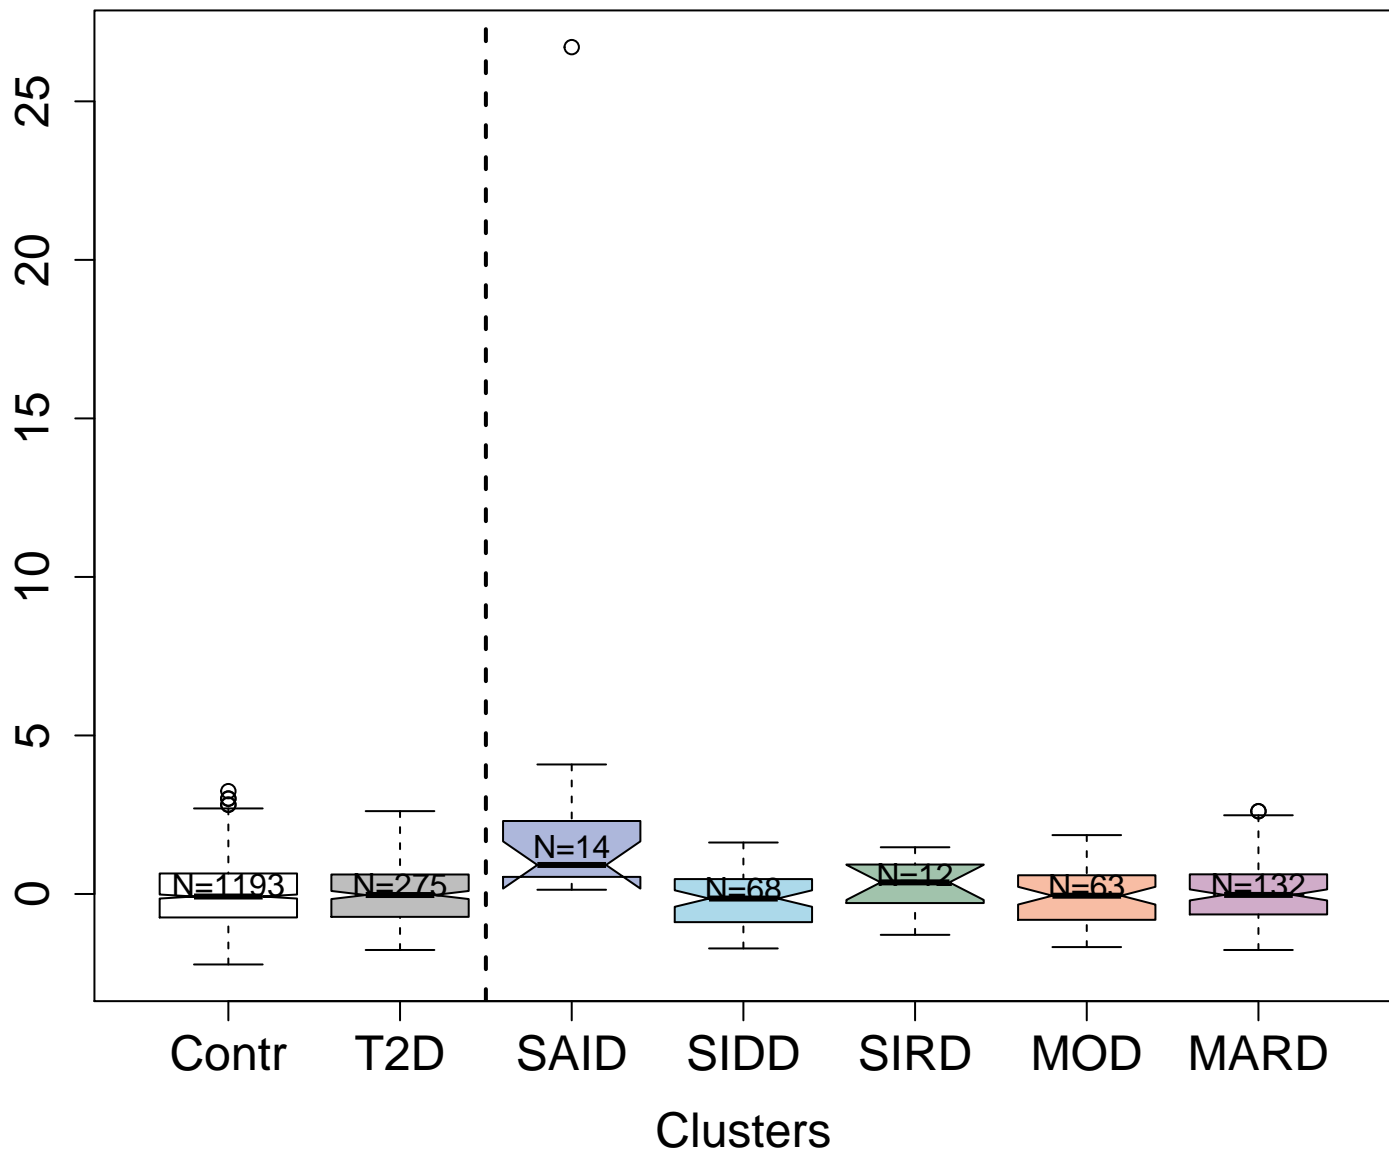

M46460 : X - 114444

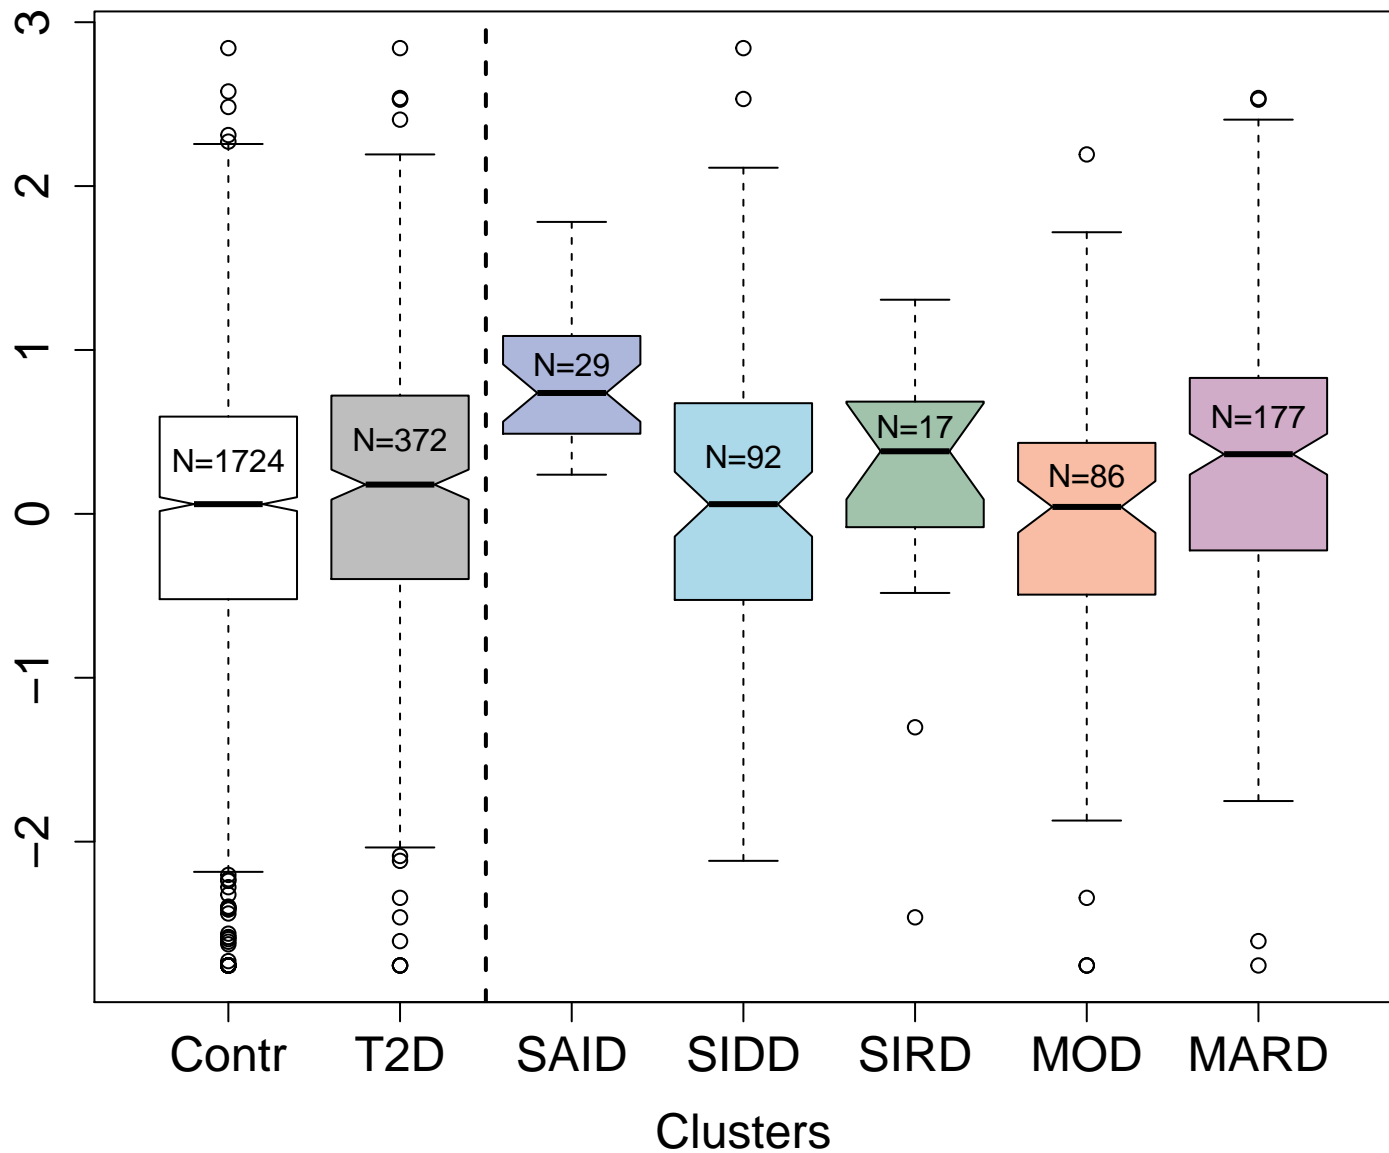

M41754 : heme

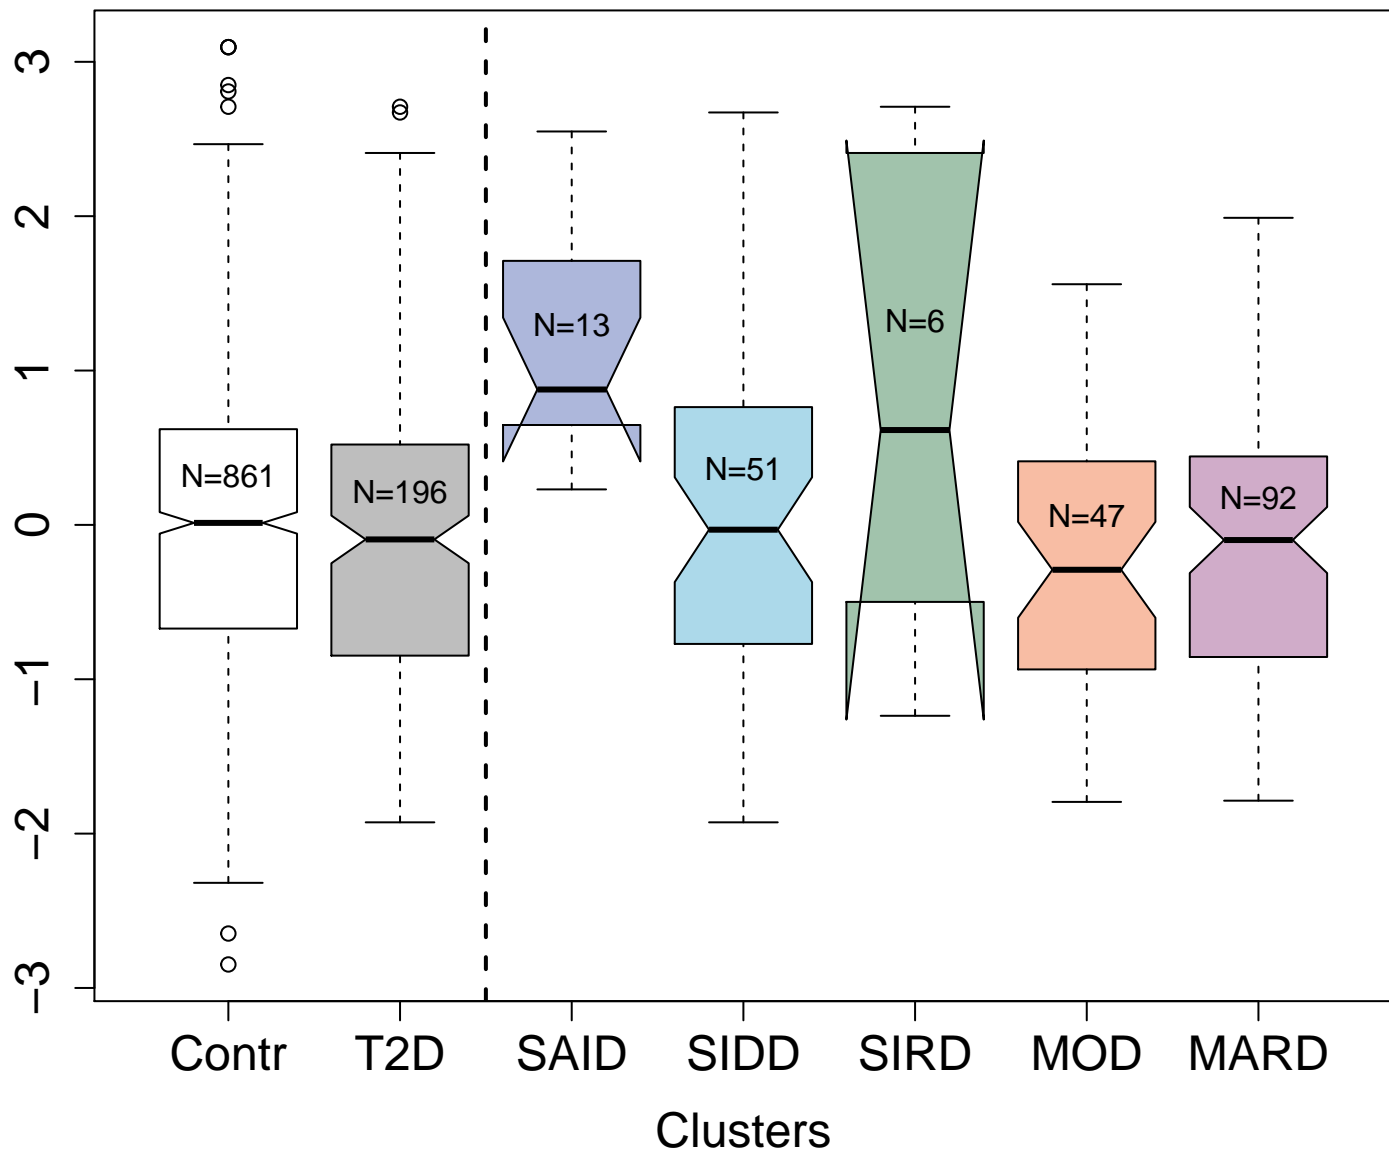

M15679 : xanthurenate

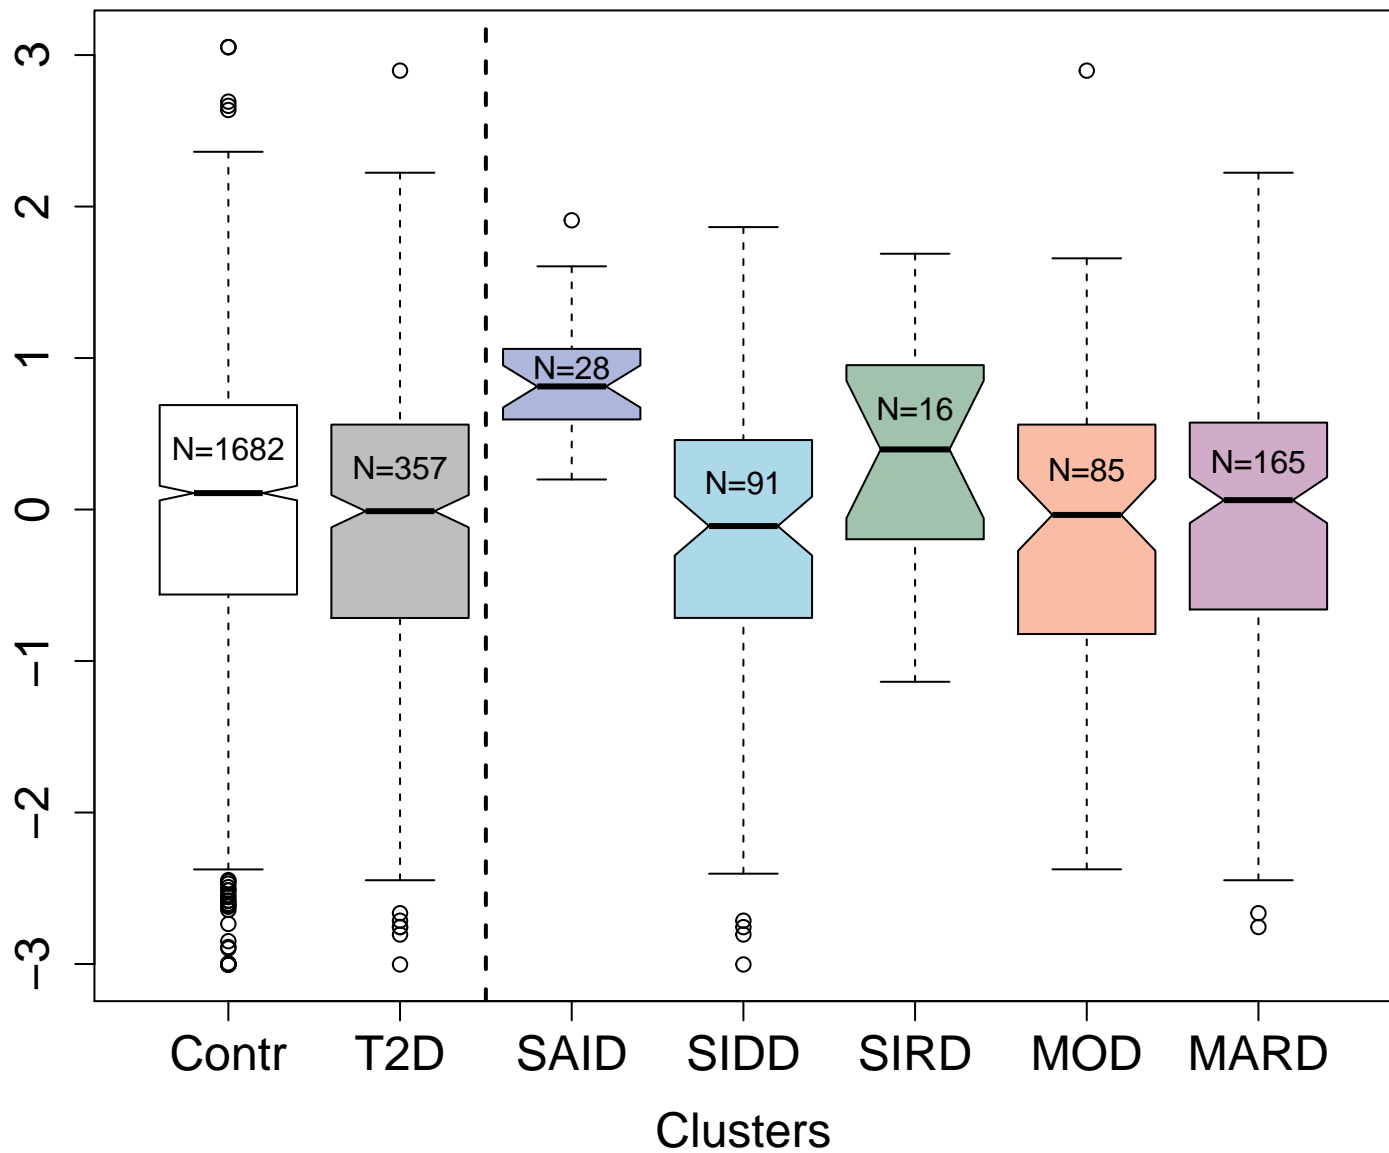

M57 : glutamate

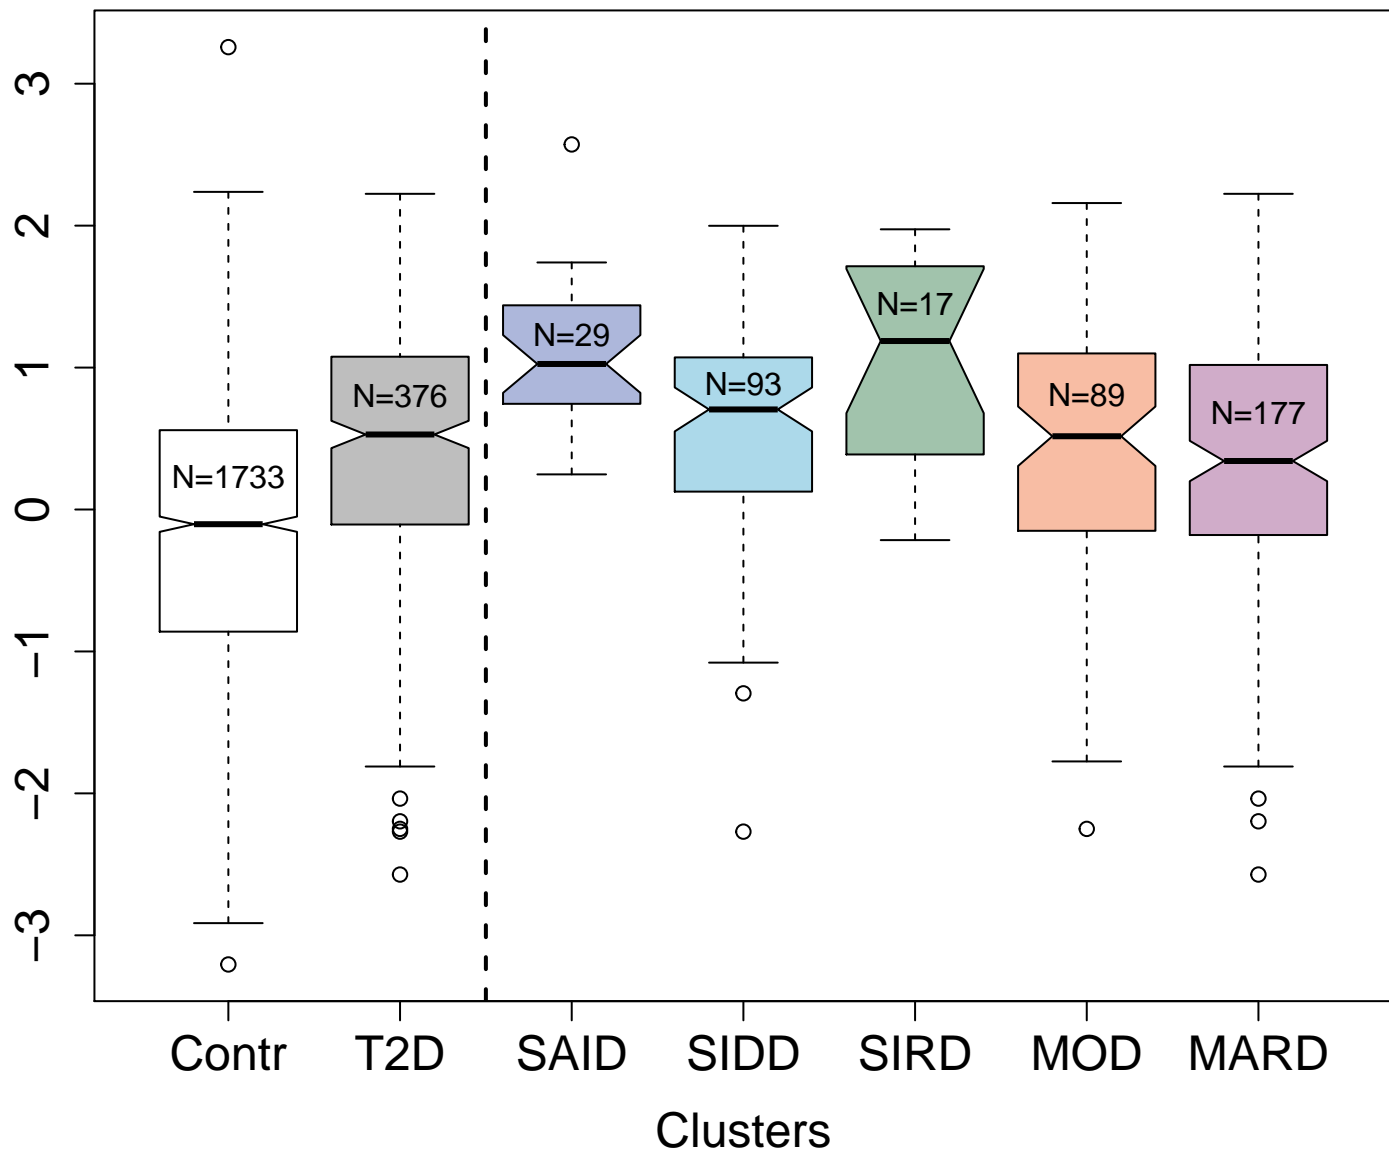

M62277 : hydroxy-CMPF\*

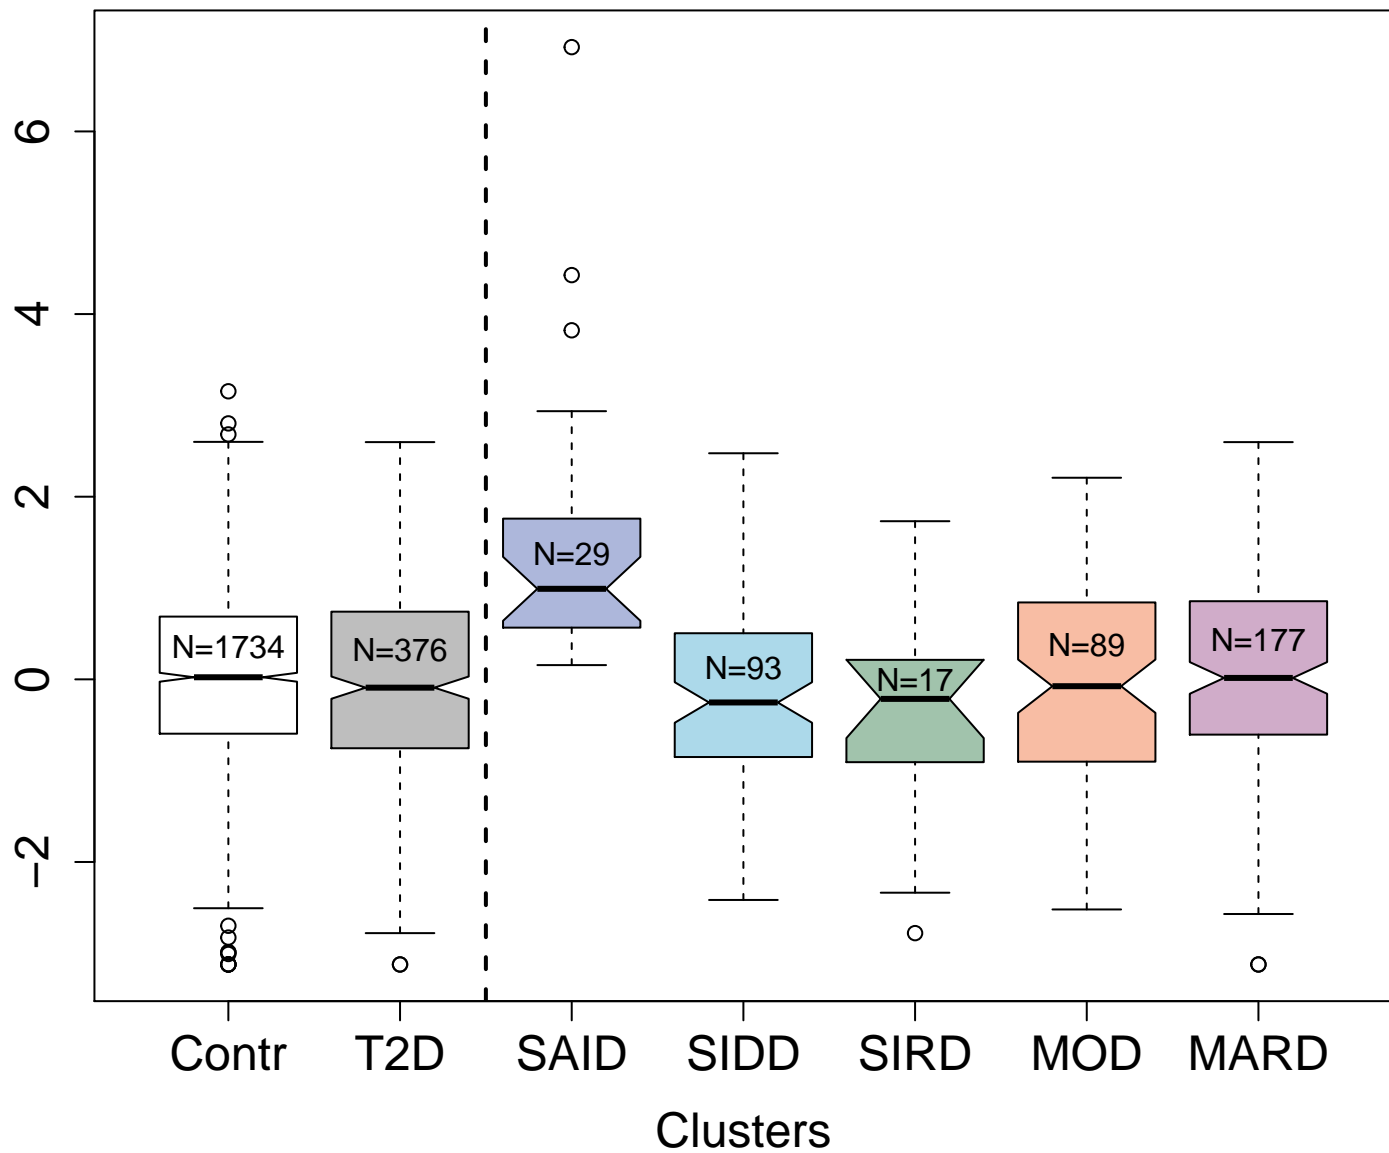

M33997 : campesterol

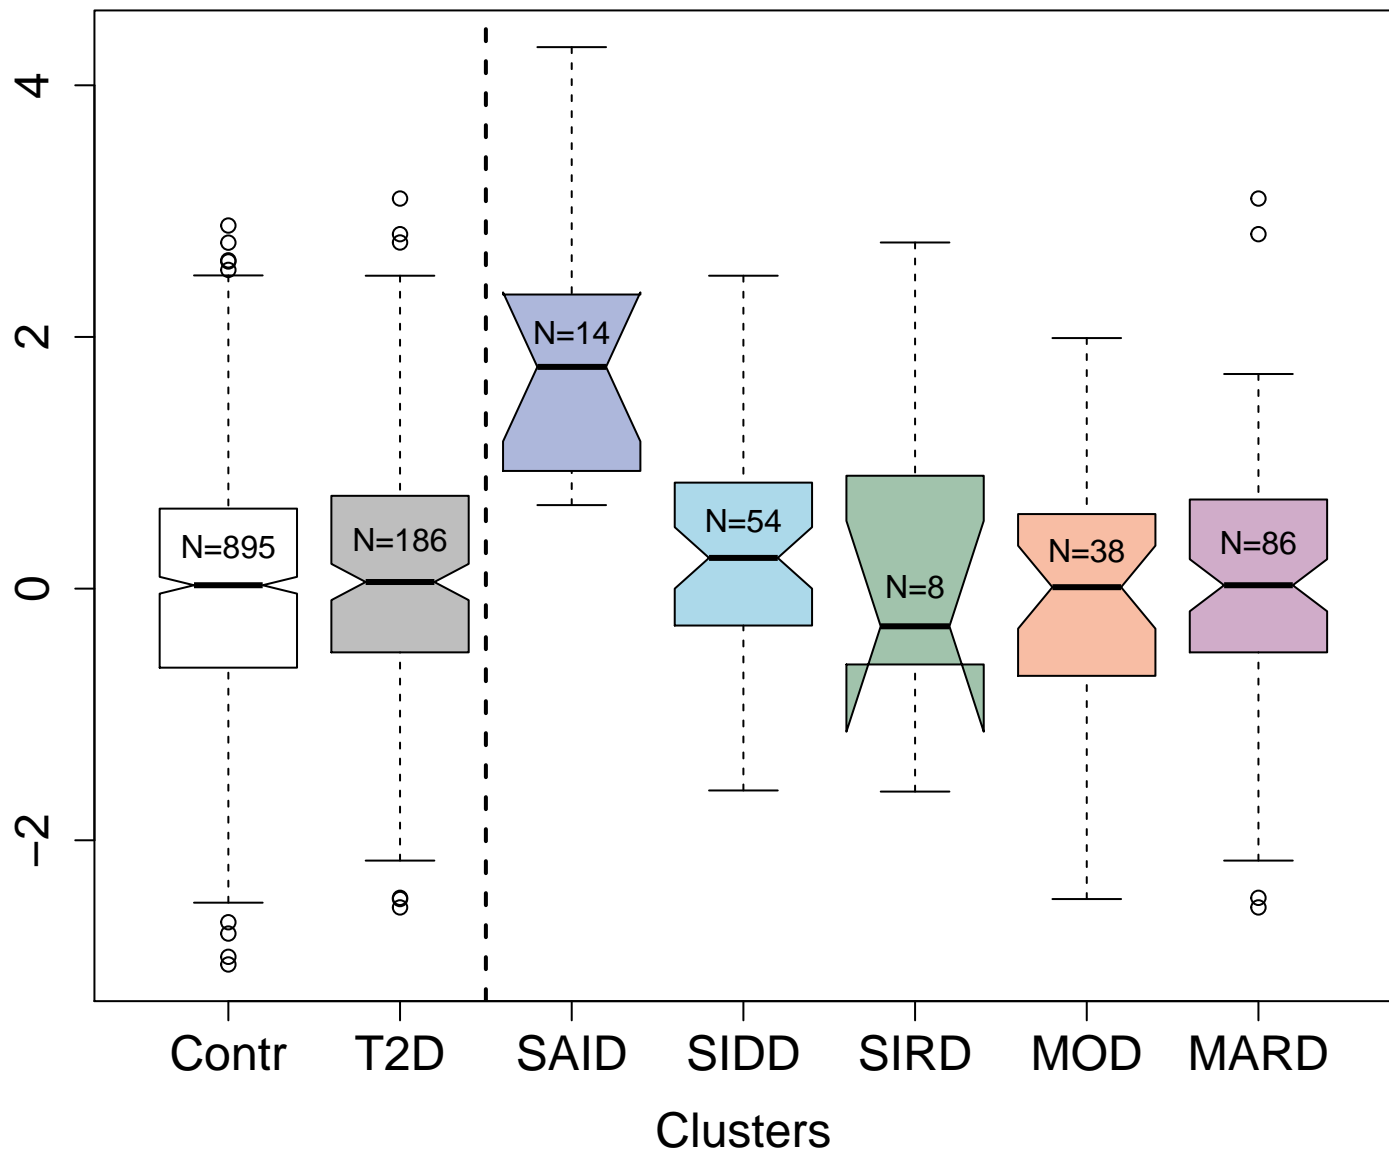

M52975 : glycodeoxycholate 3--sulfate

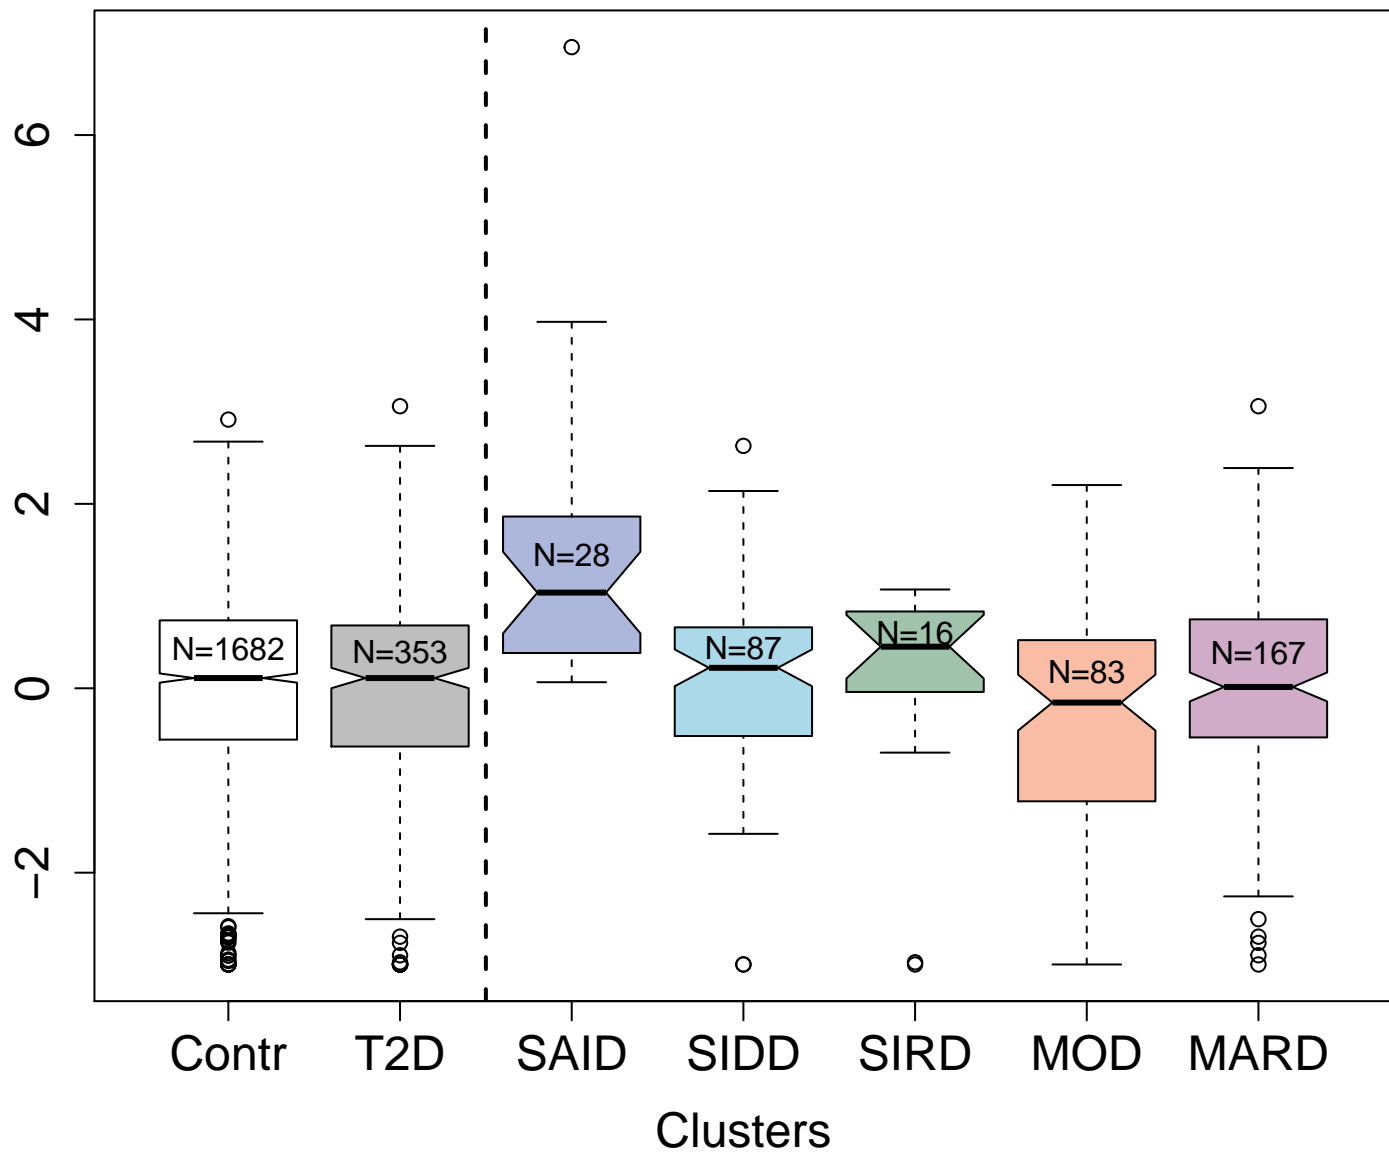



M57461 : arginine\*

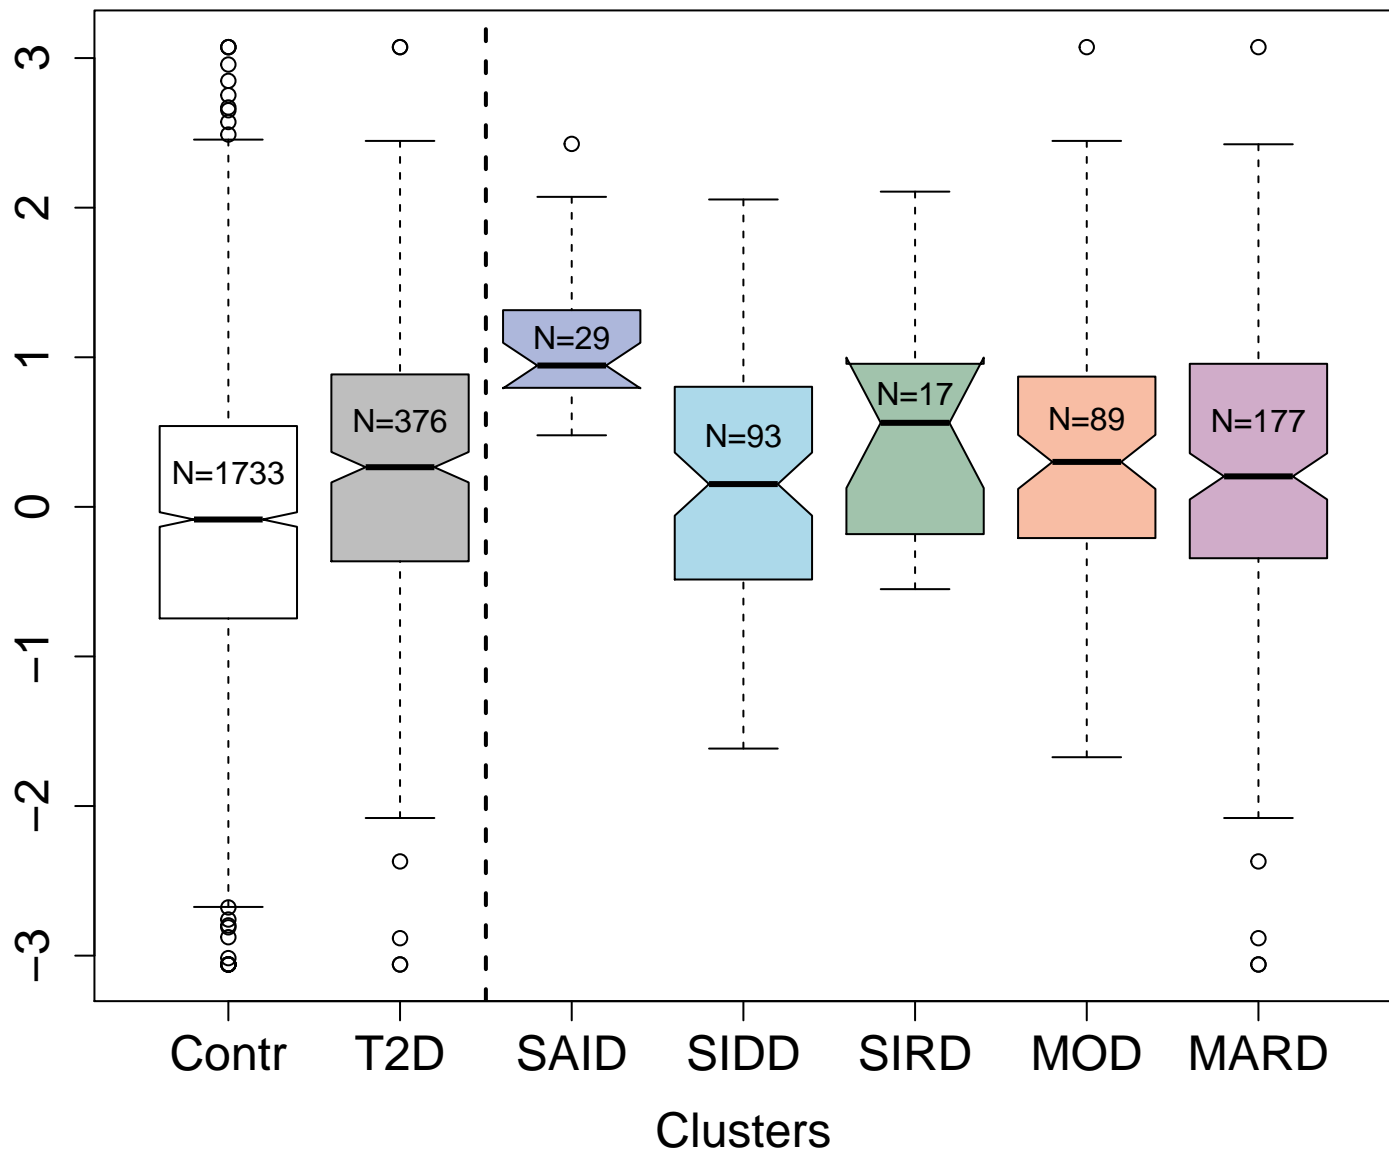

M46111 : guaiacol sulfate

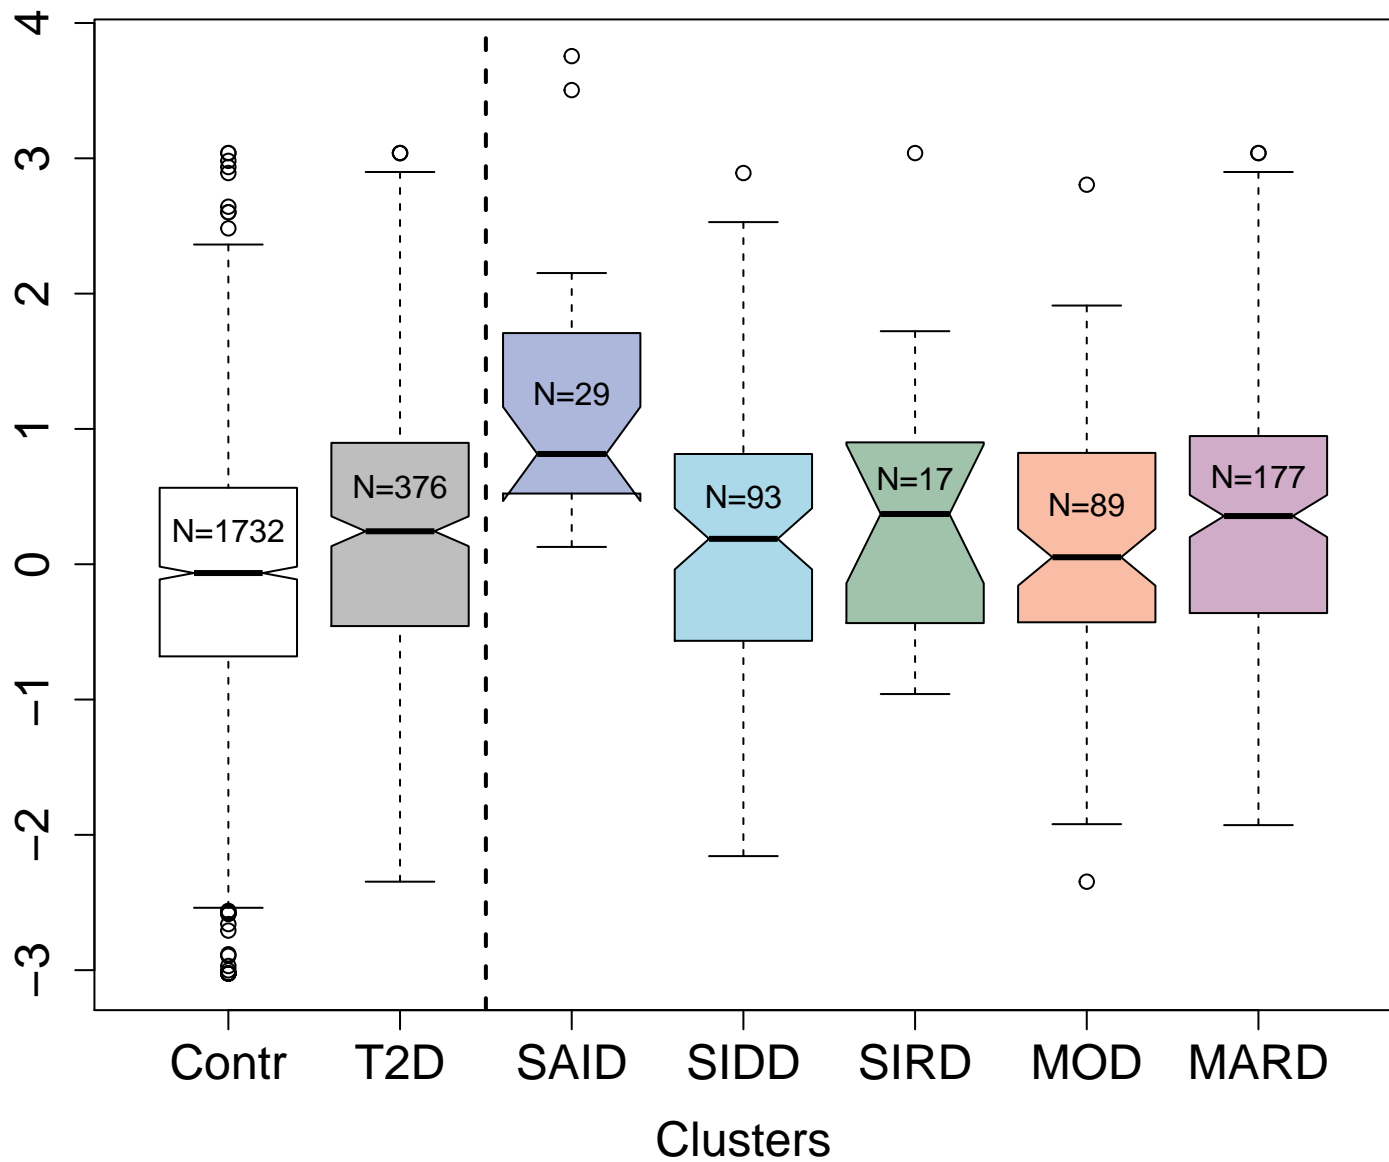

M63589 : 3,5-dichloro-2,6-dihydroxybenzoic acid

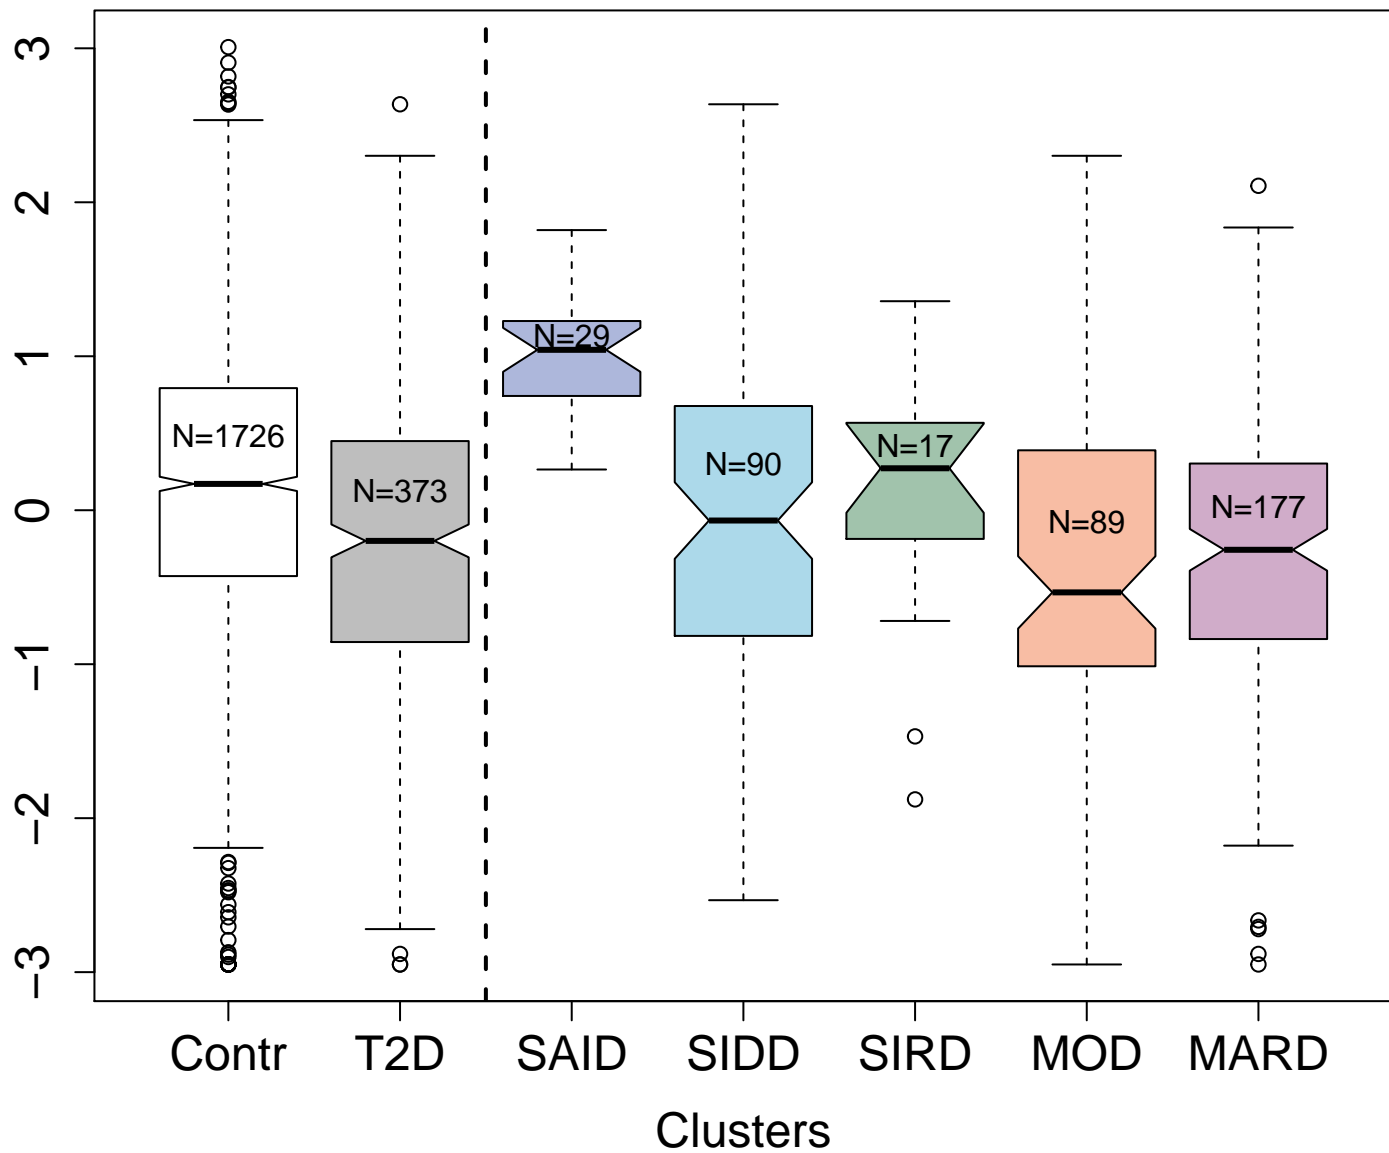

M46325 : 1-arachidonoyl-GPA (20:4)

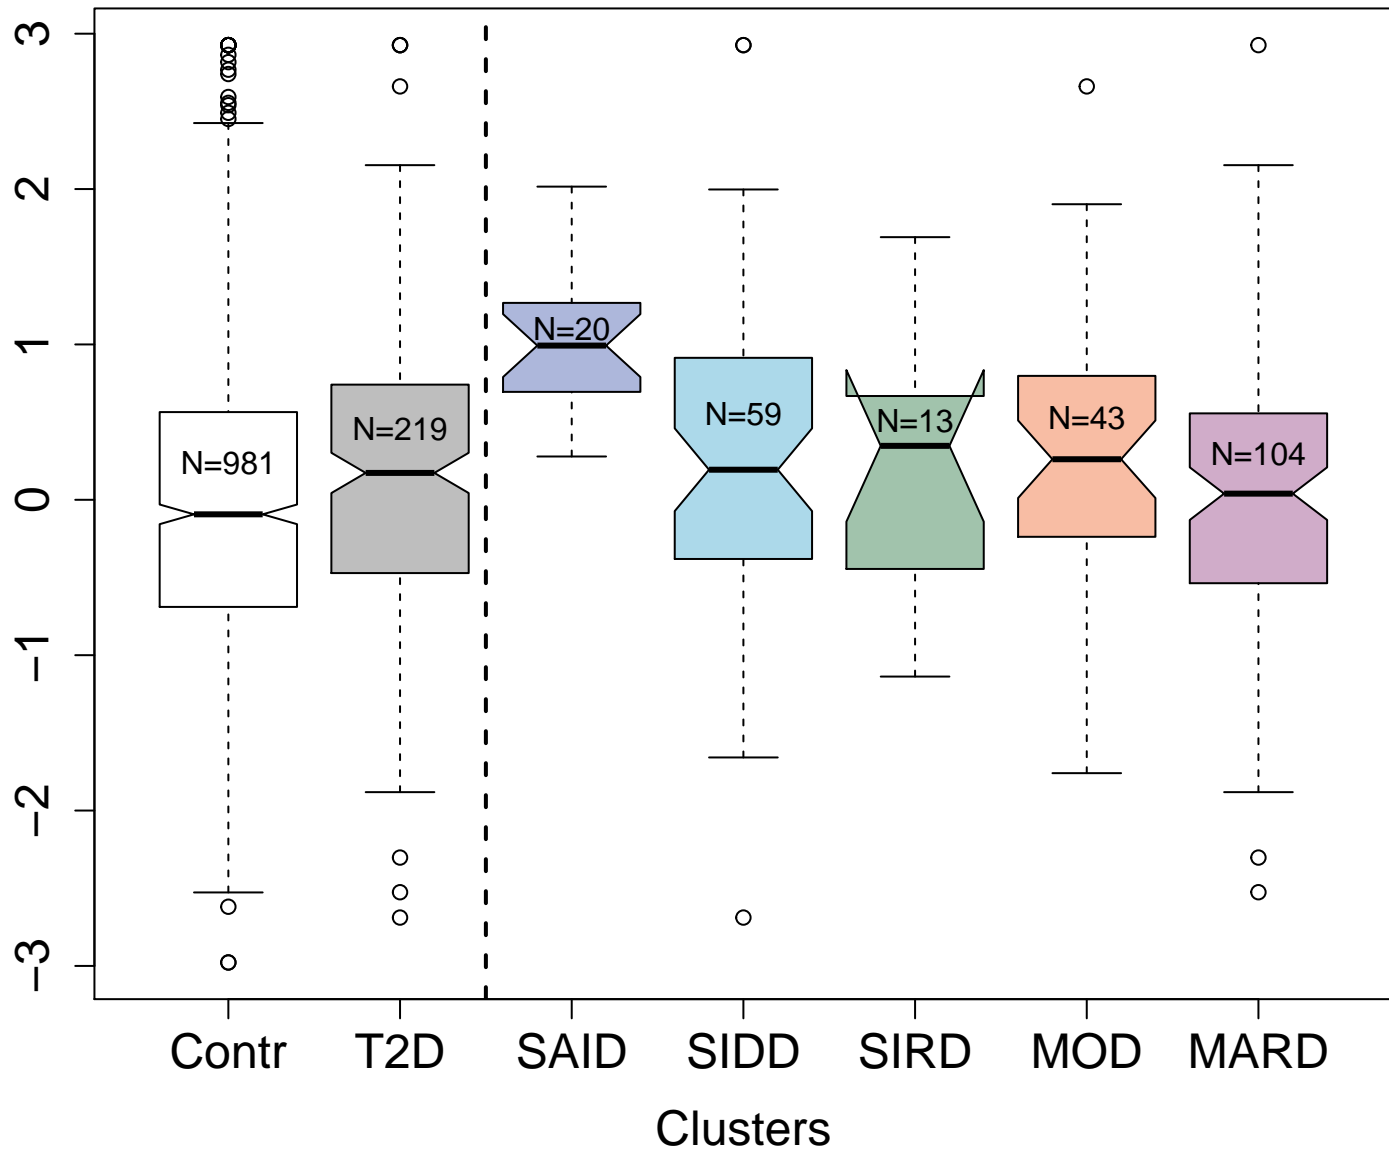

M36850 : tauroithocholate 3-sulfate

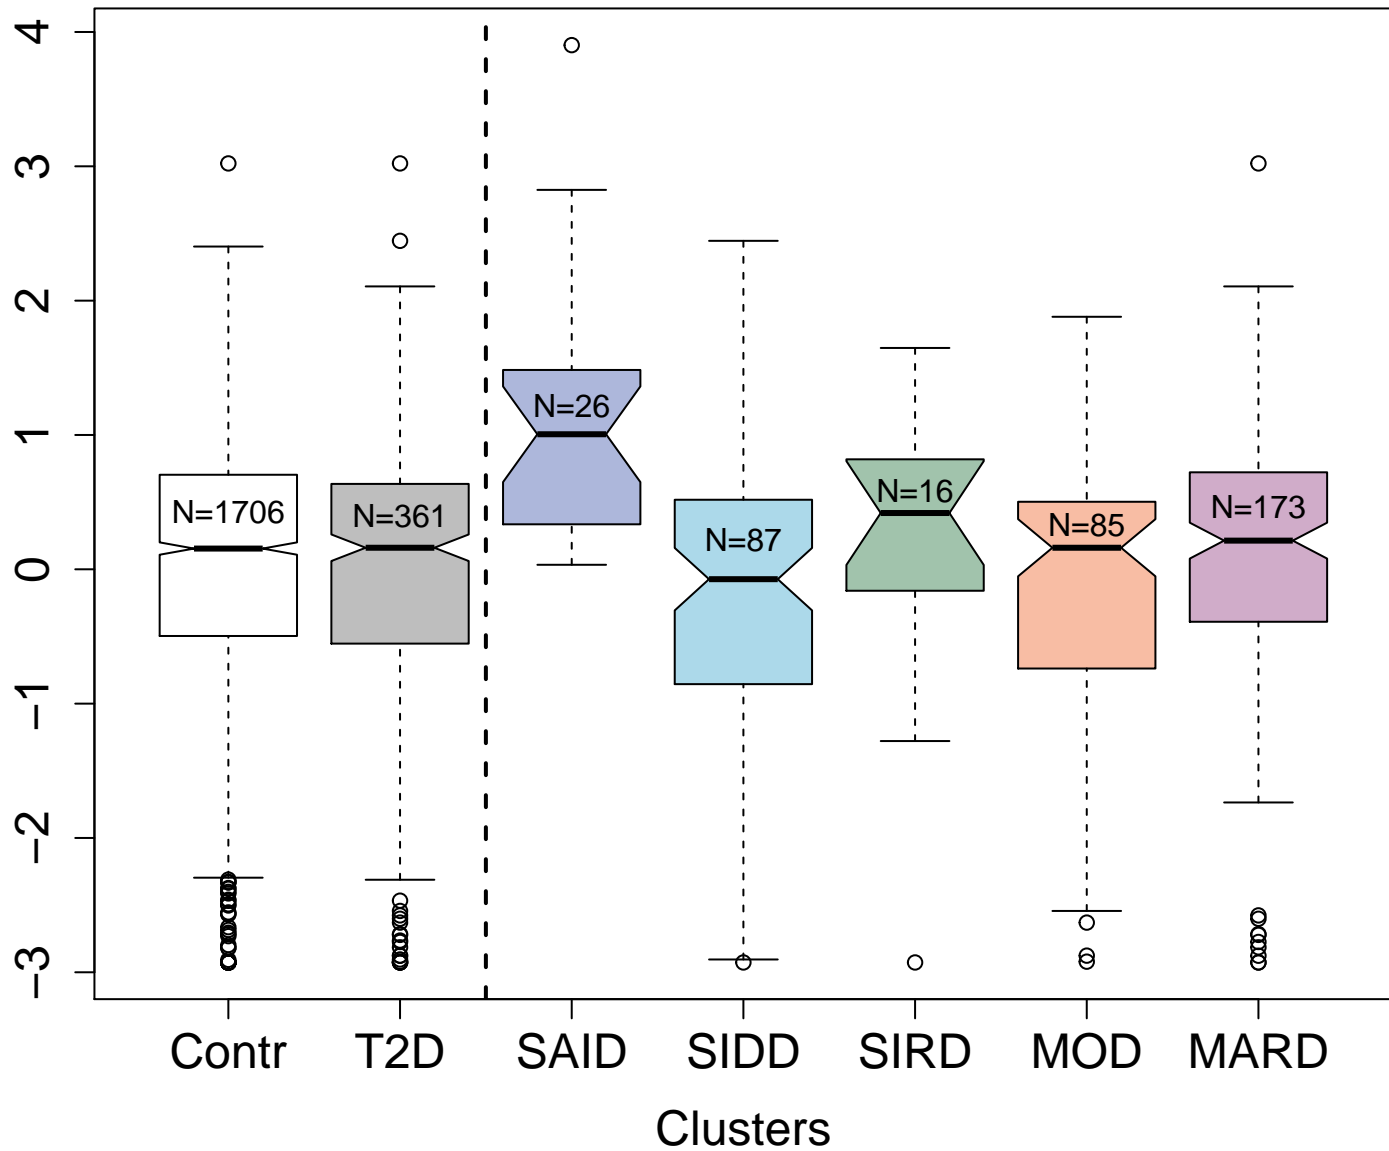

M62500 : X - 25271

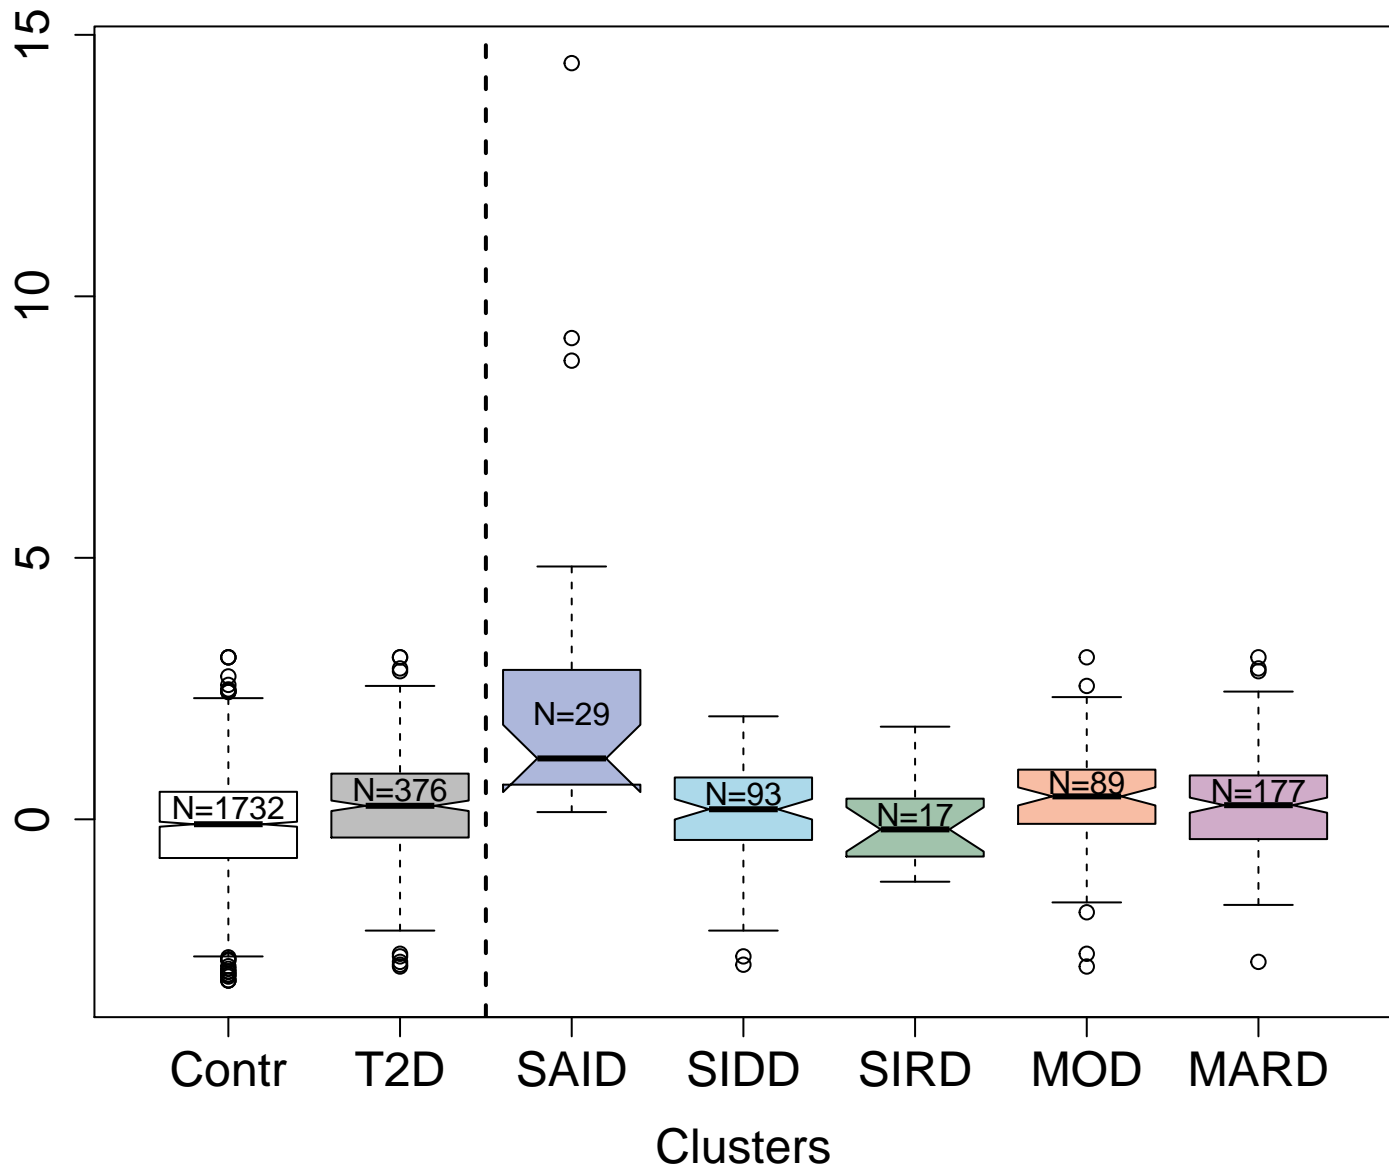

M22163 : EDTA

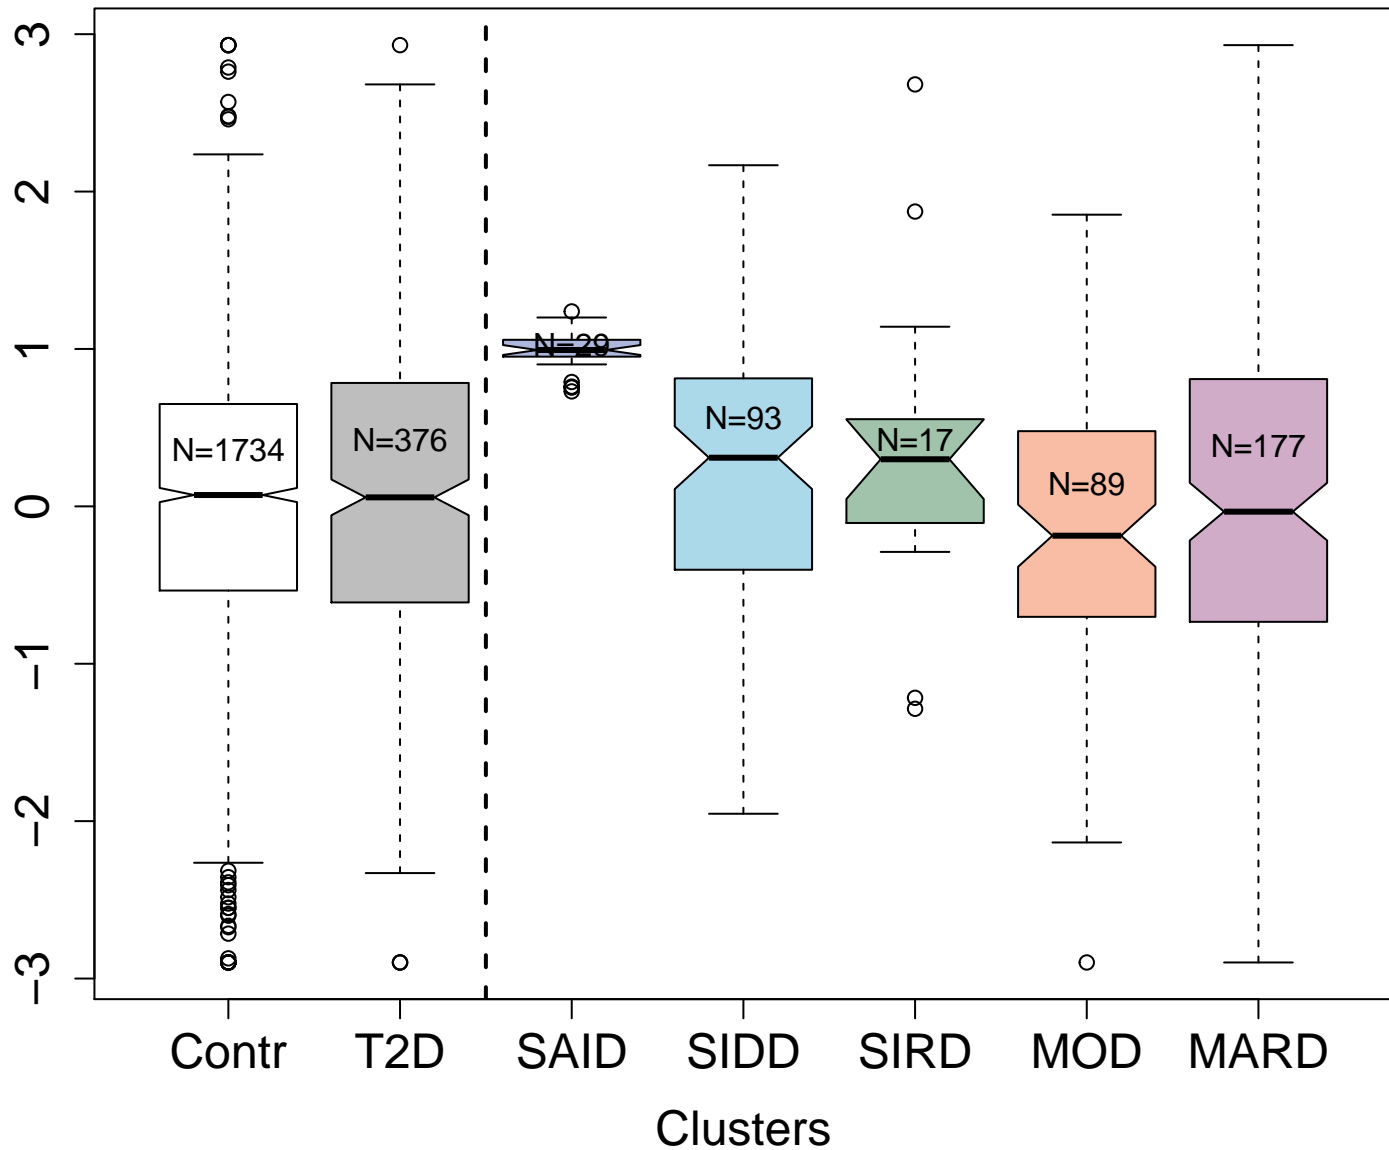

M34397 : 1-arachidonylglycerol (20:4)

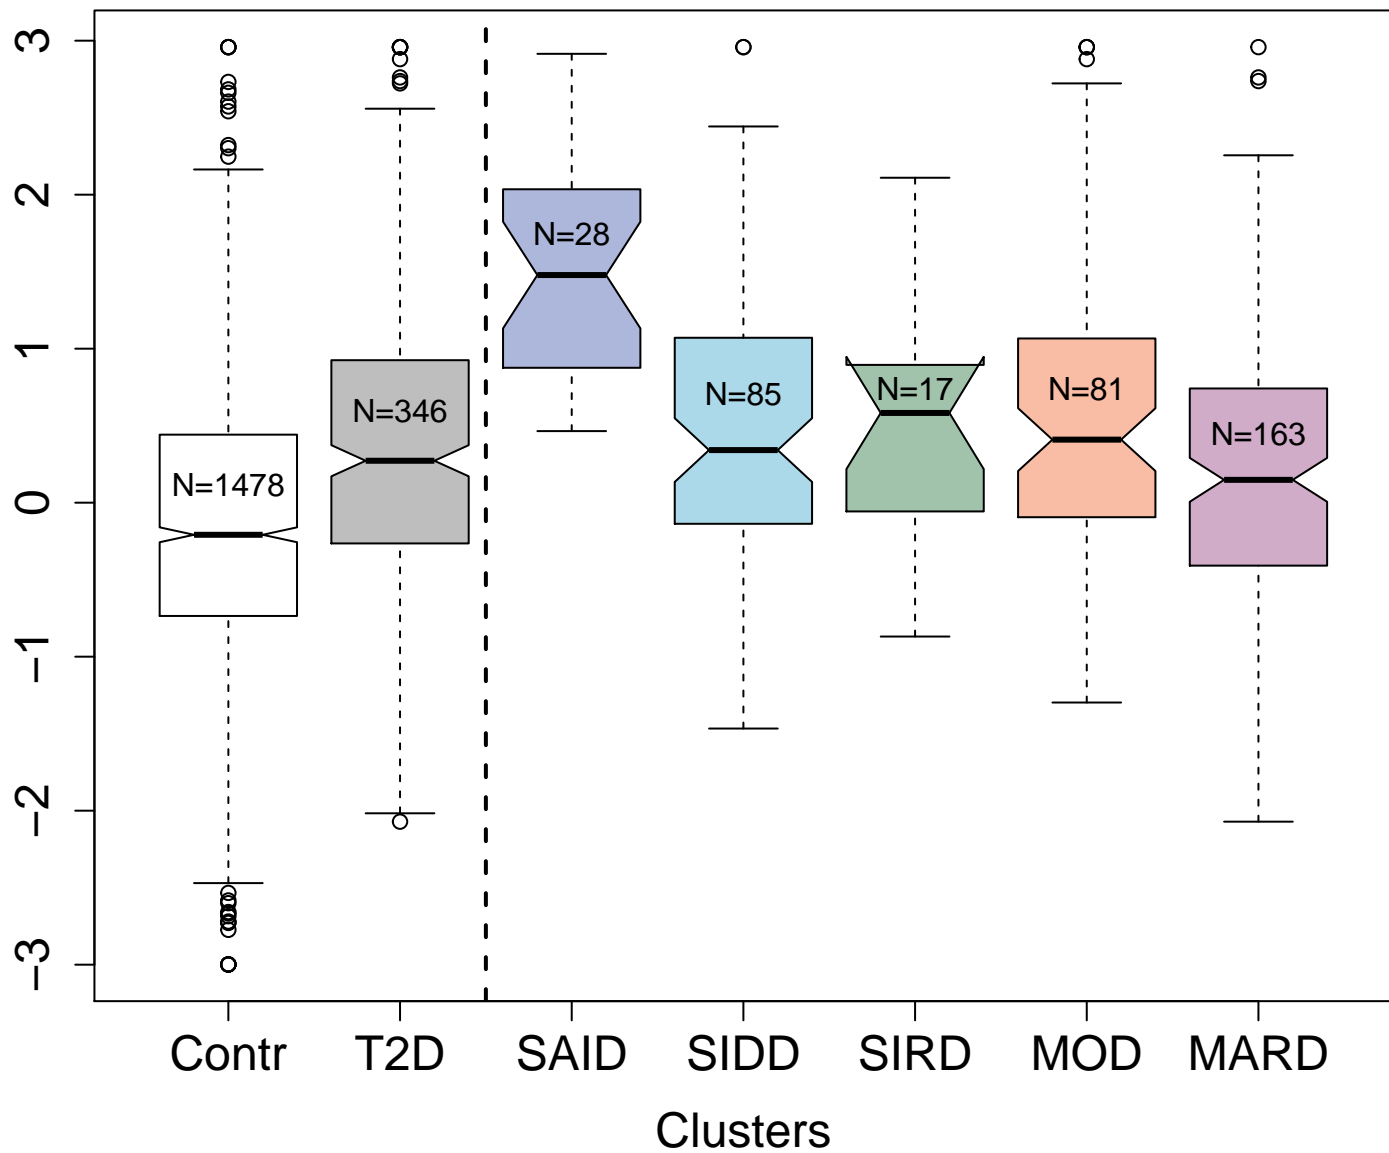



M52710 : 1-linoleoyl-2-arachidonoyl-GPC (18:2/20:4n6)\*

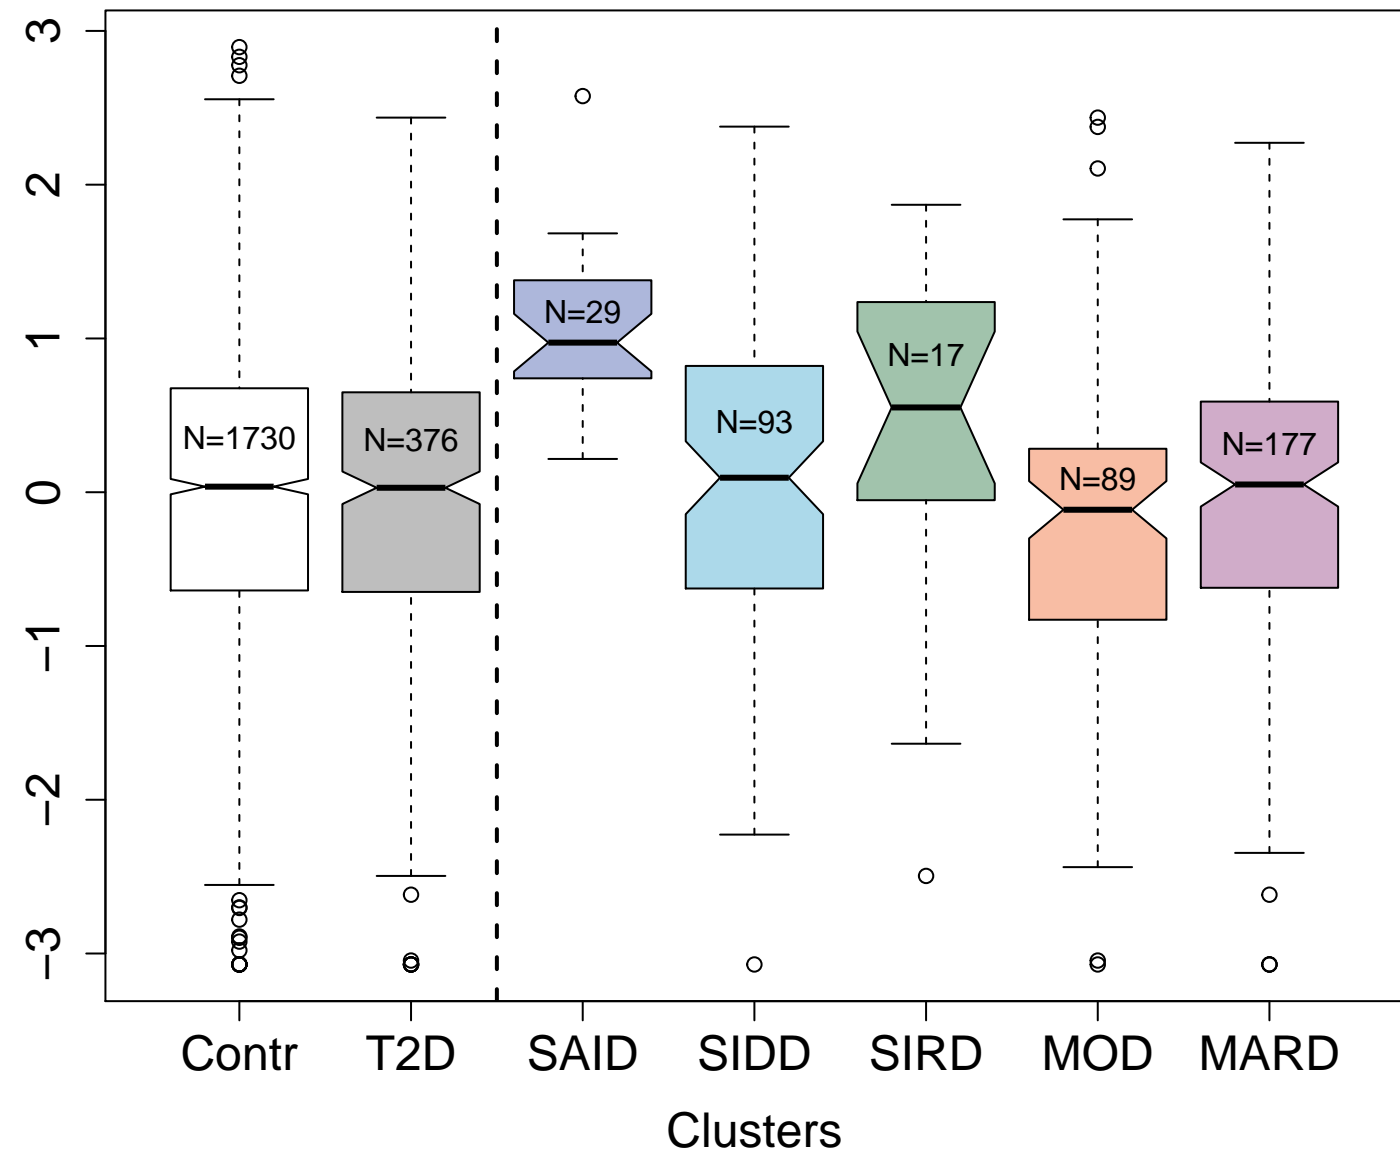

M32497 : 10-undecenoate (11:1n1)

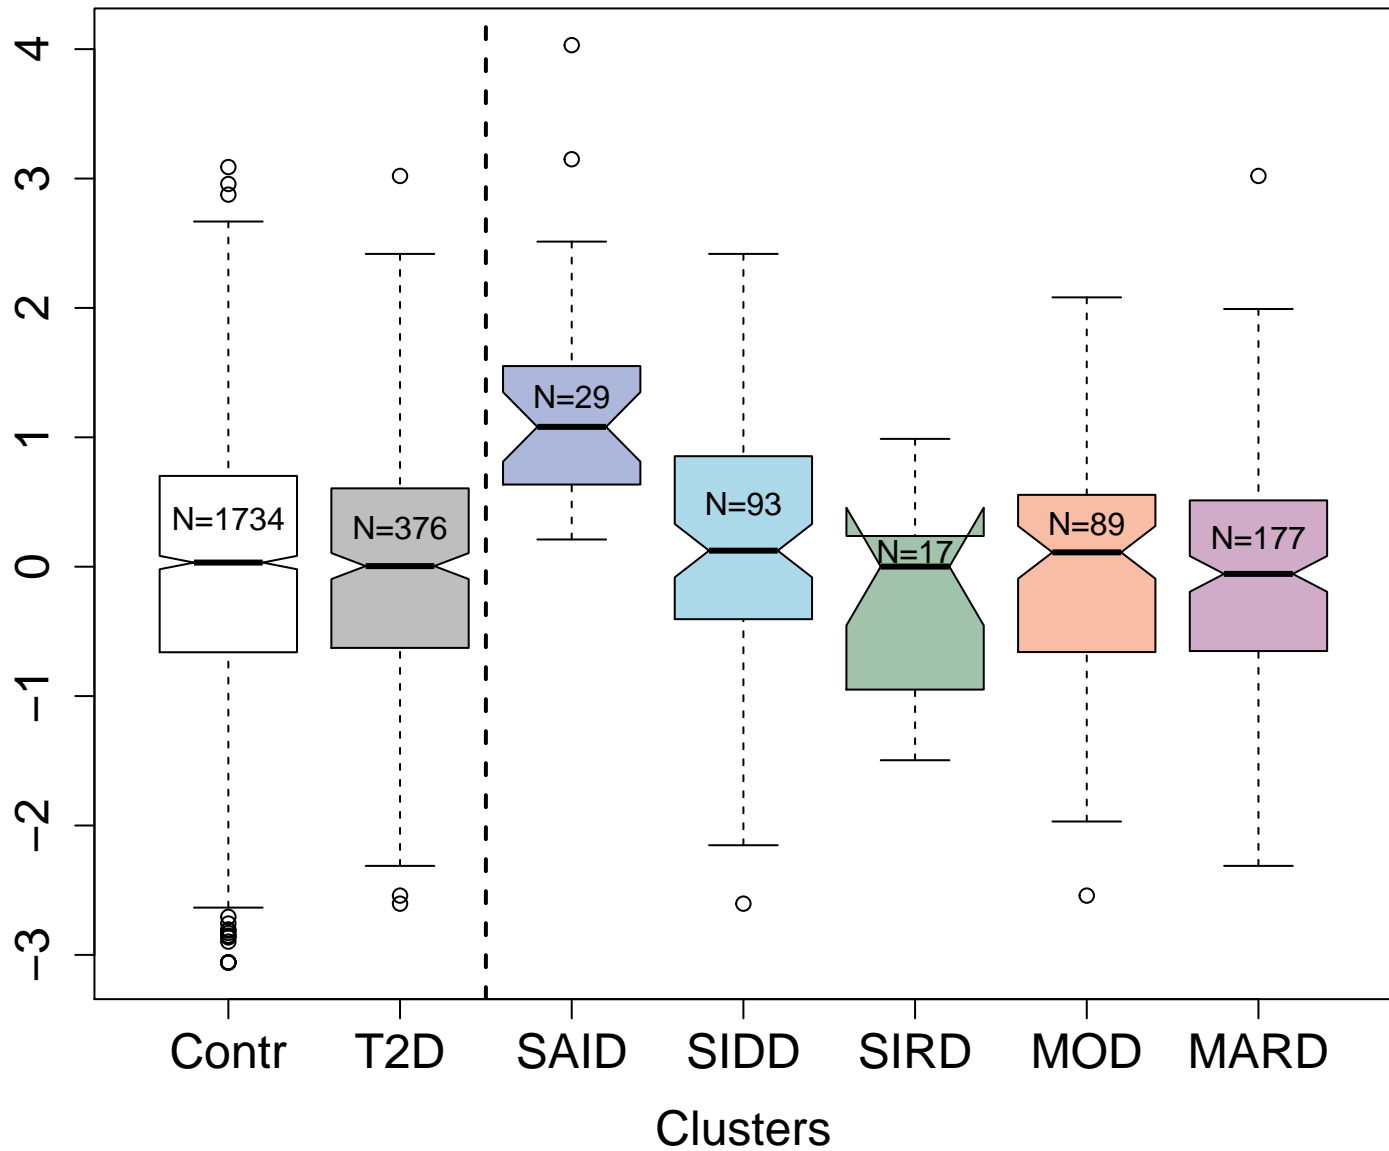

M38296 : (16 or 17)-methylstearate (a19:0 or i19:0)

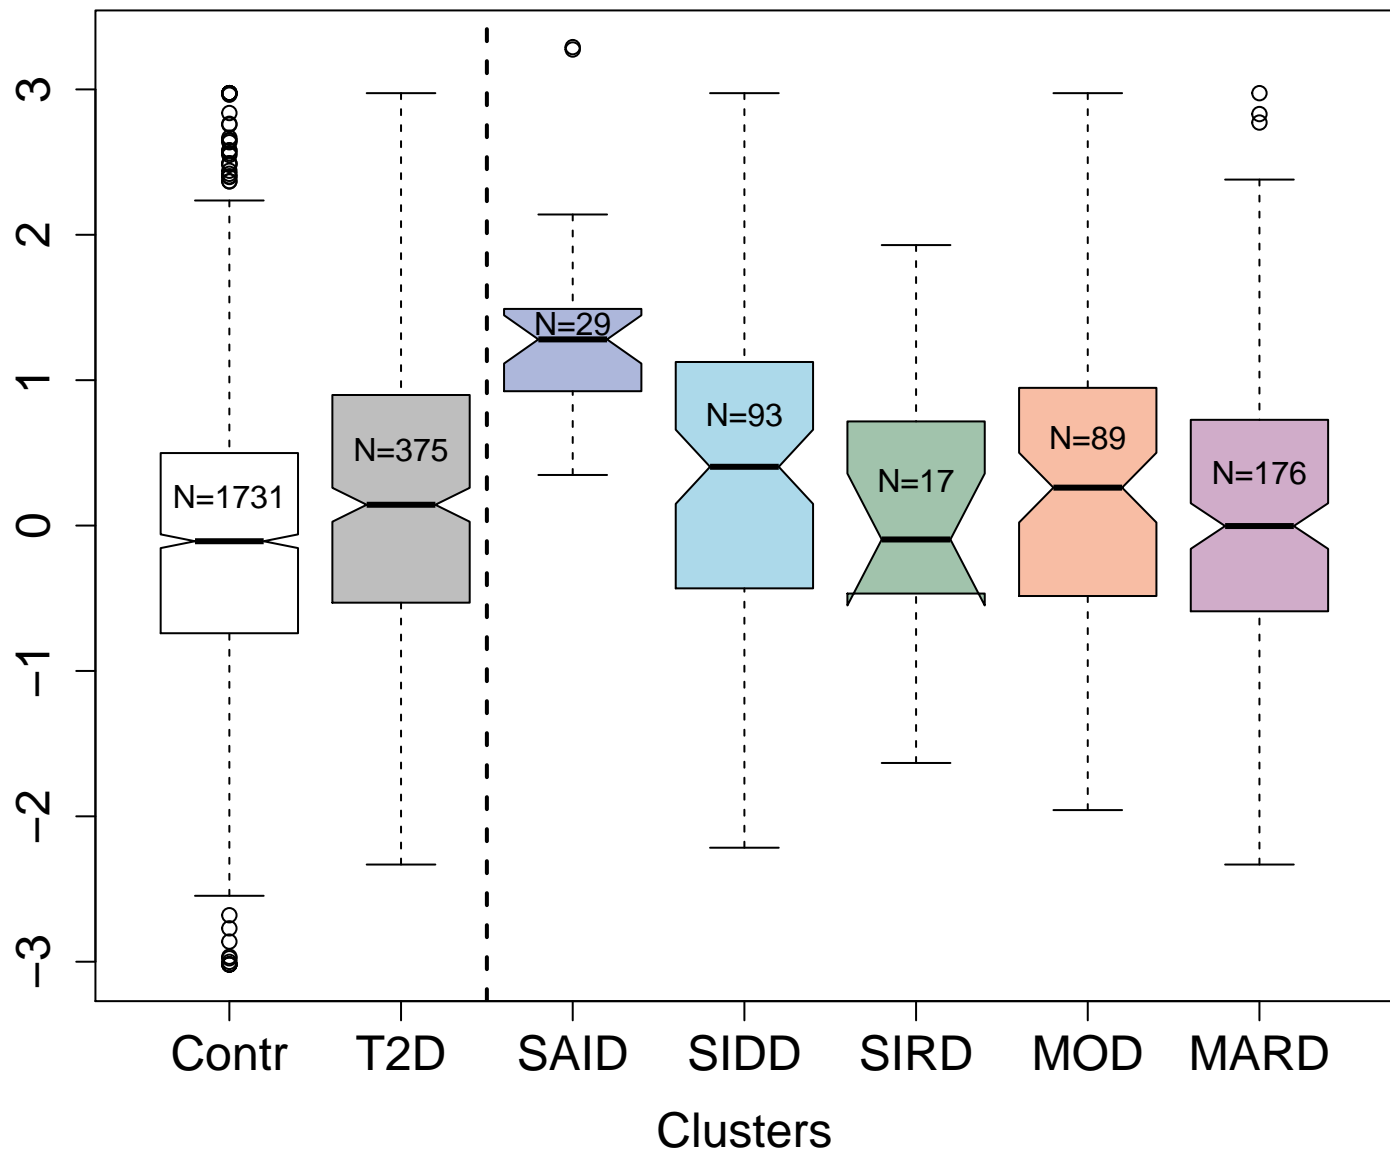

M18369 : gamma-glutamylleucine

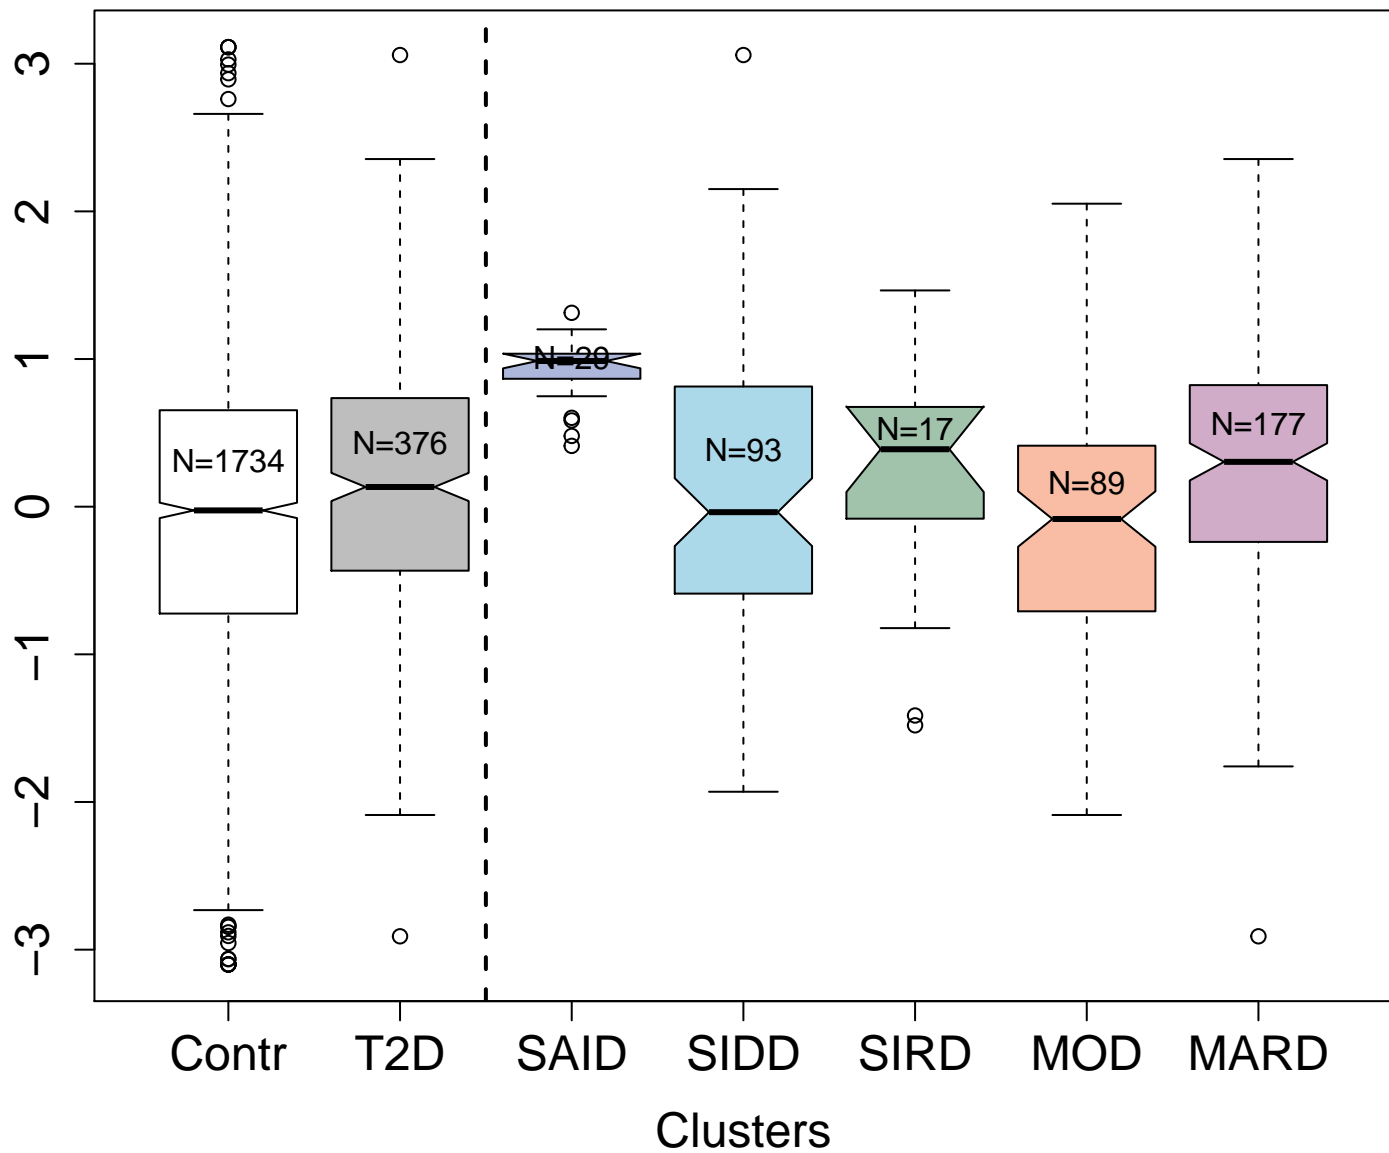

M52465 : 1-palmitoyl-2-docosahexaenoyl-GPE (16:0/22:6)

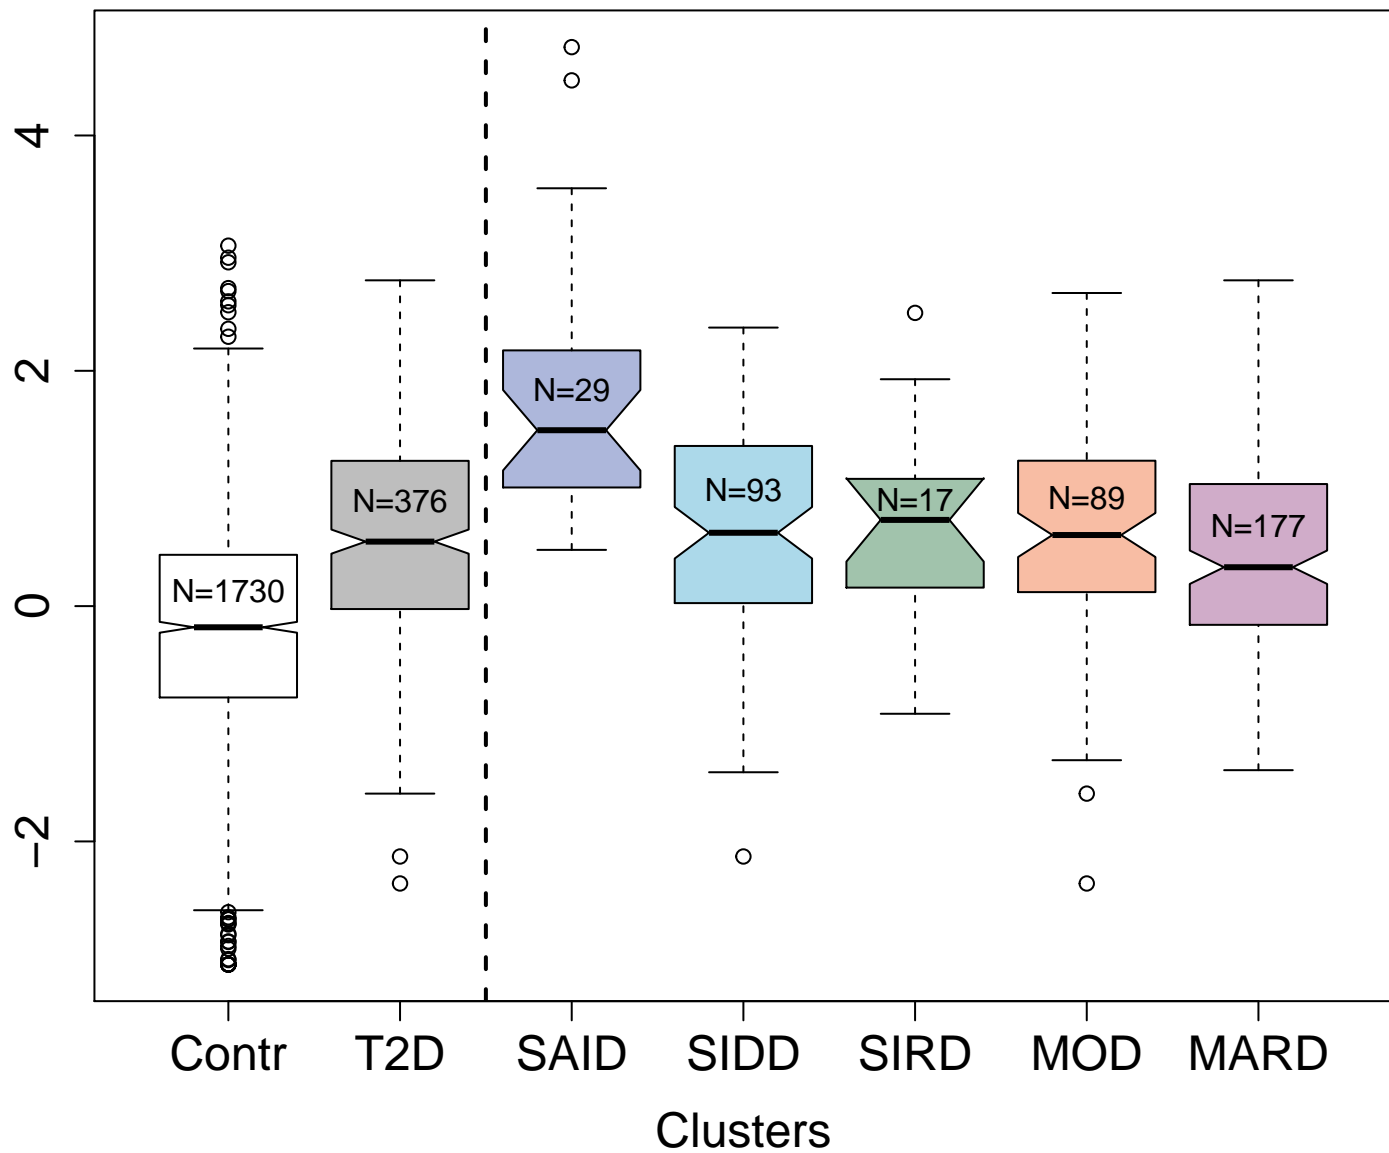

M57585 : 4-acetamidobenzoate

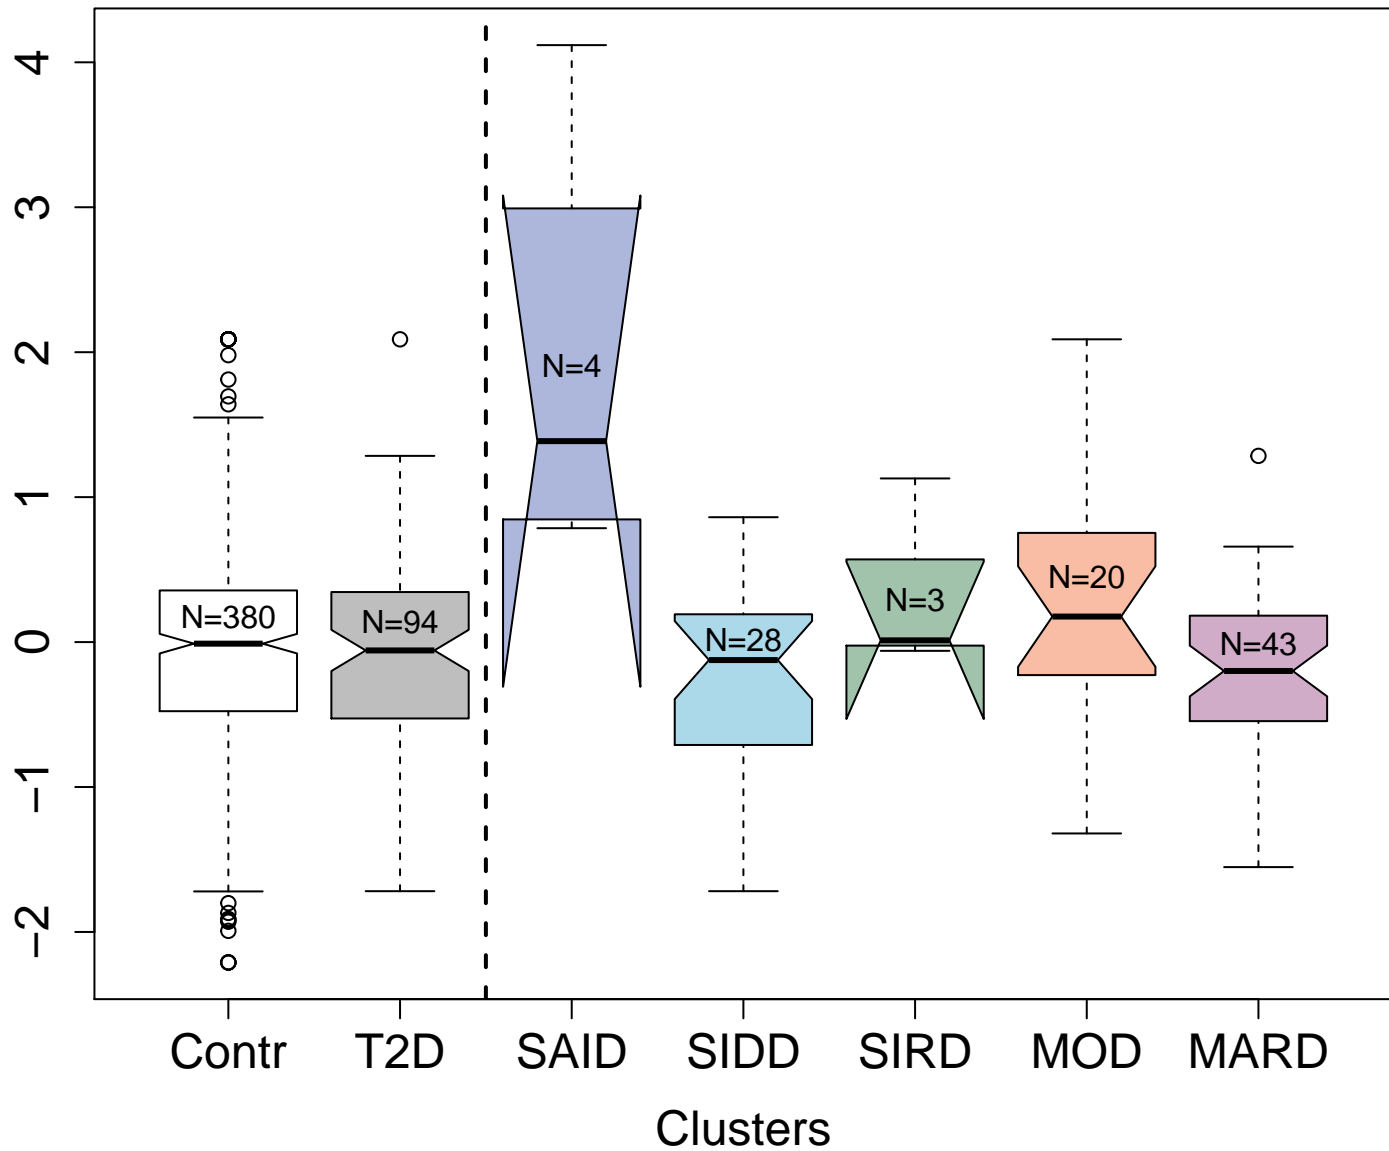

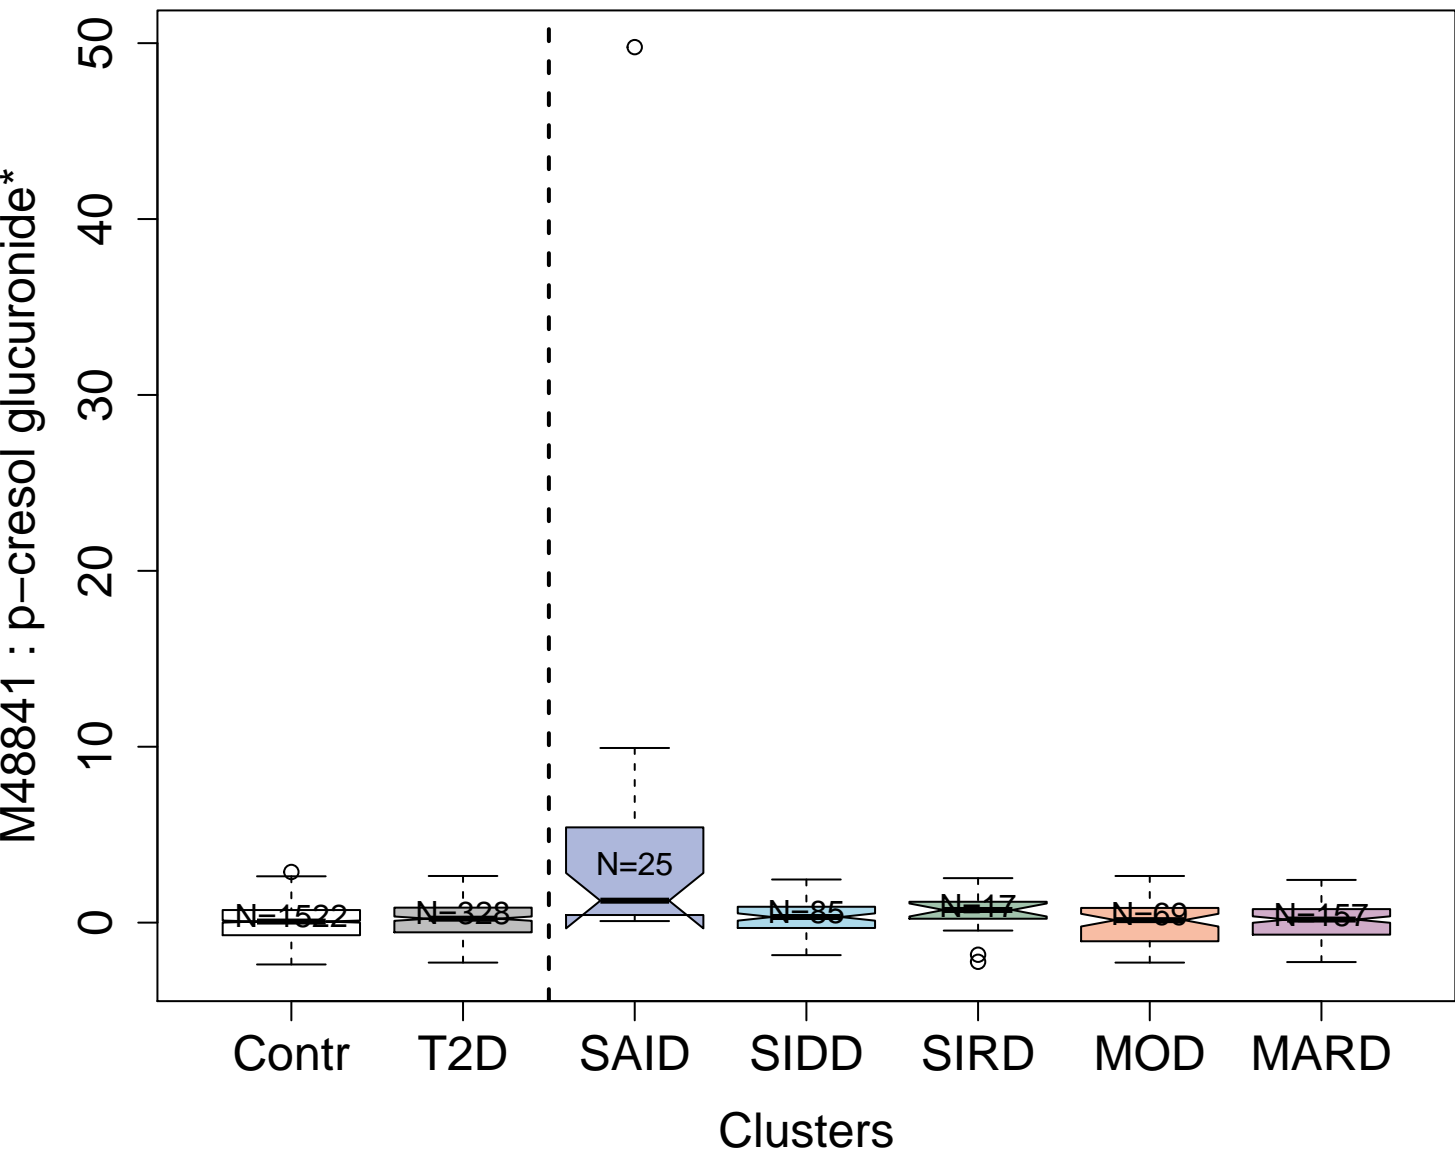

M47883 : o-hydroxyatorvastatin

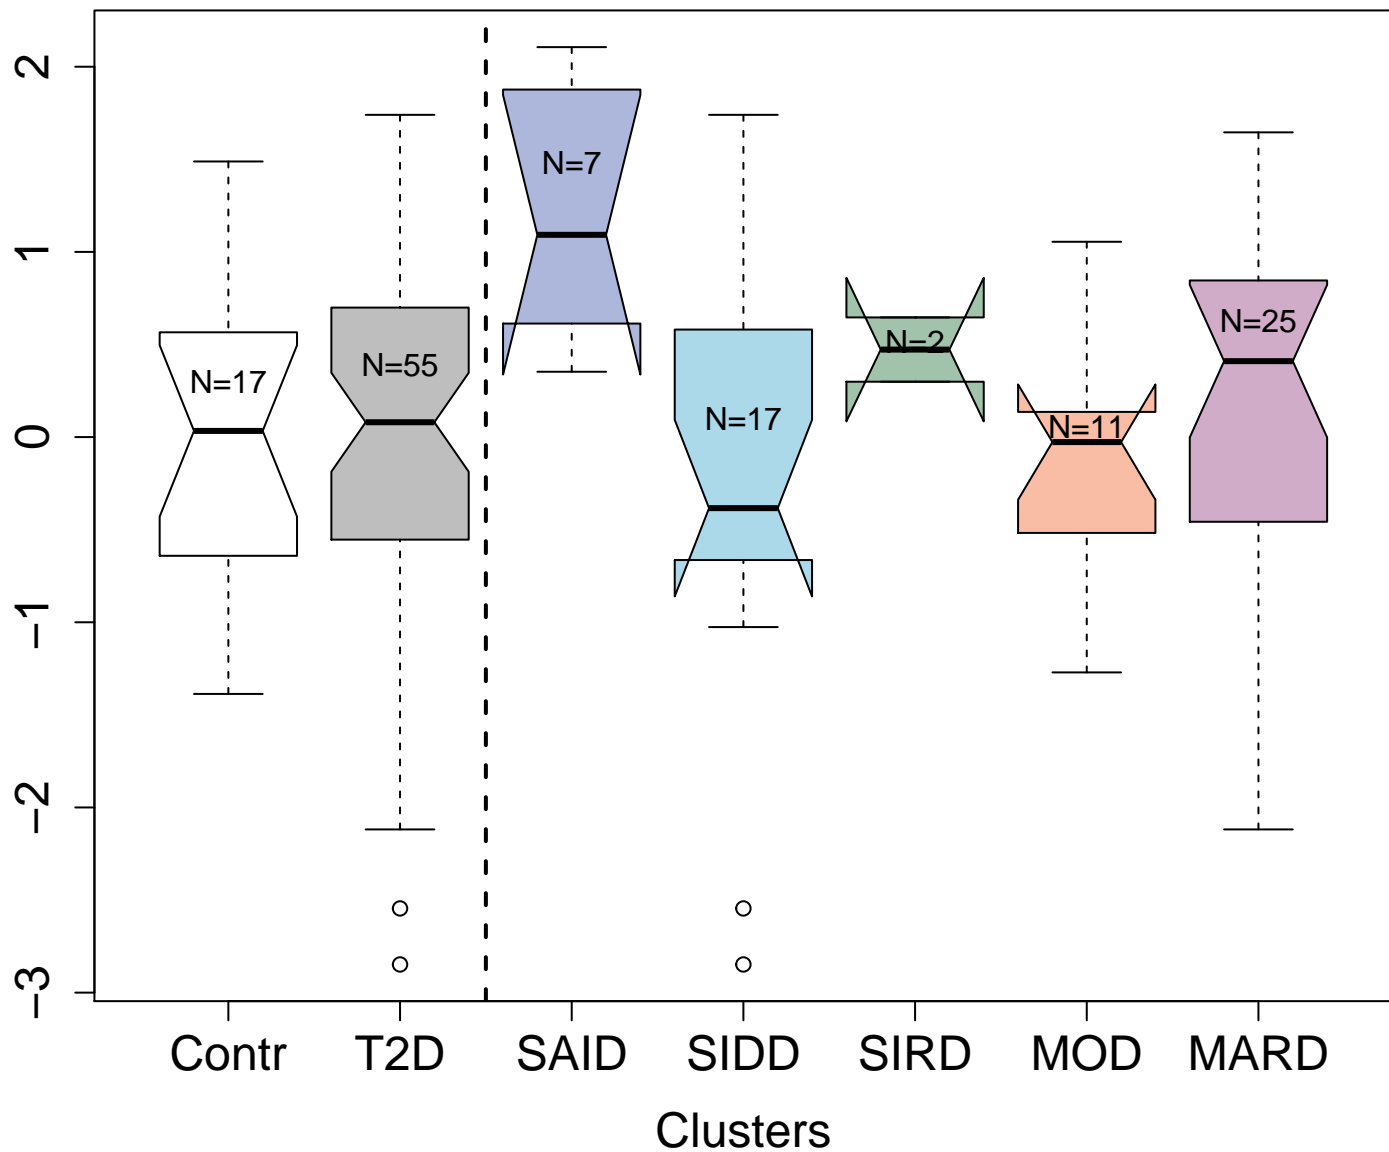



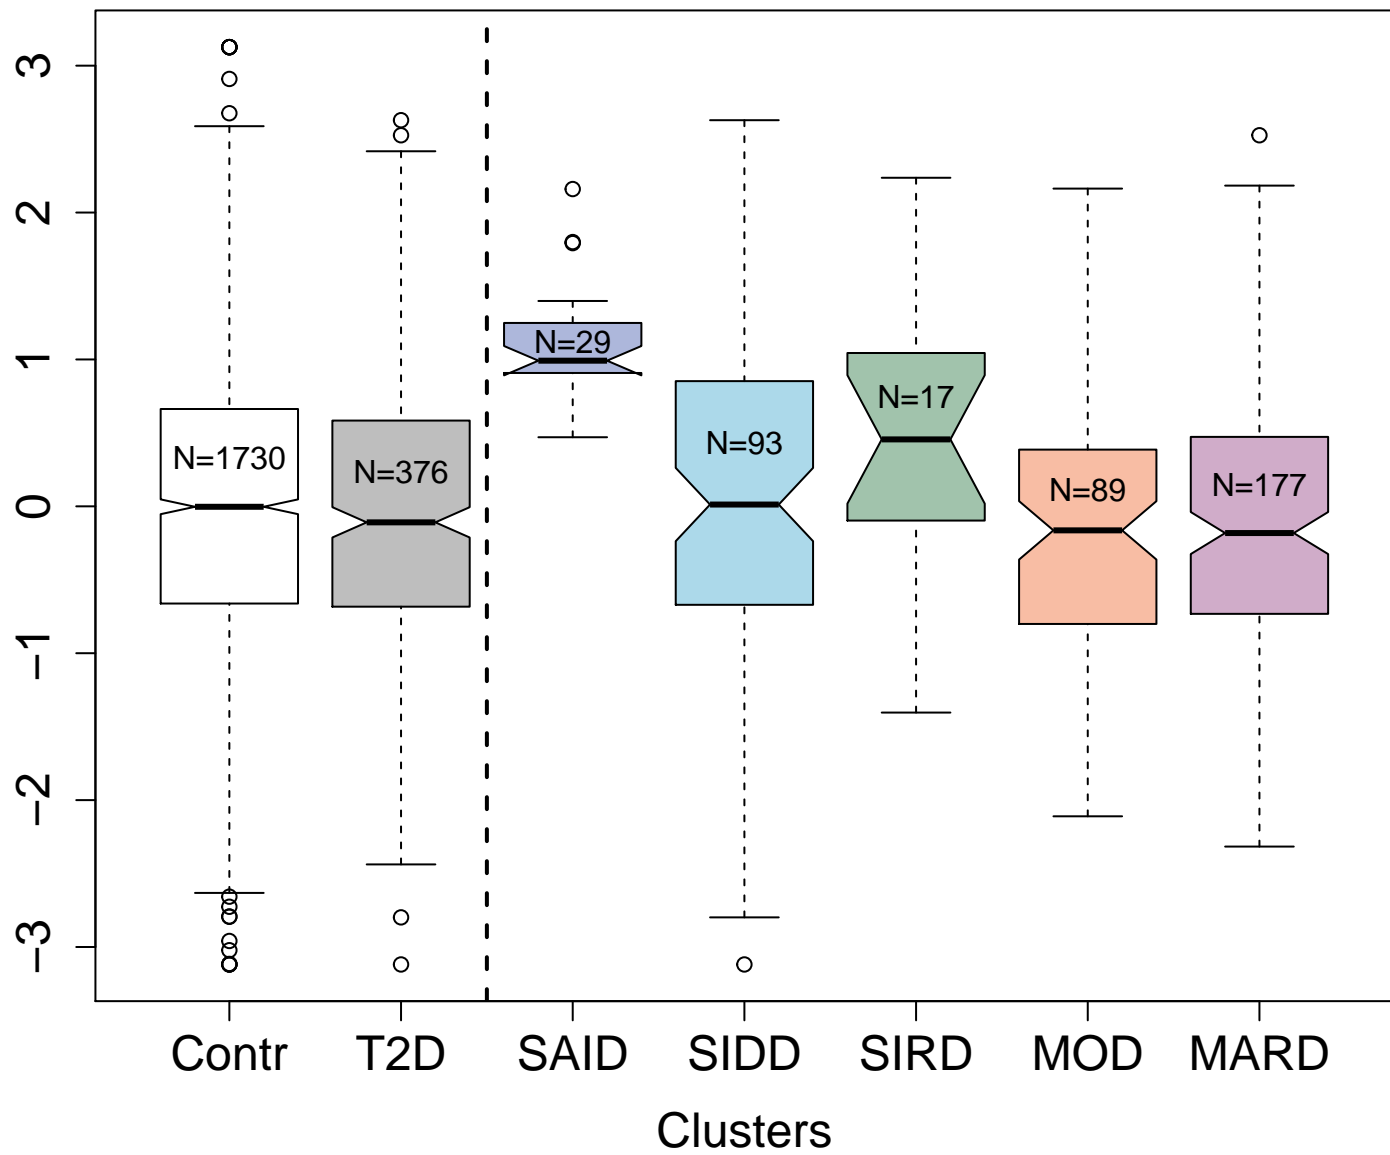

M42002 : lanthionine

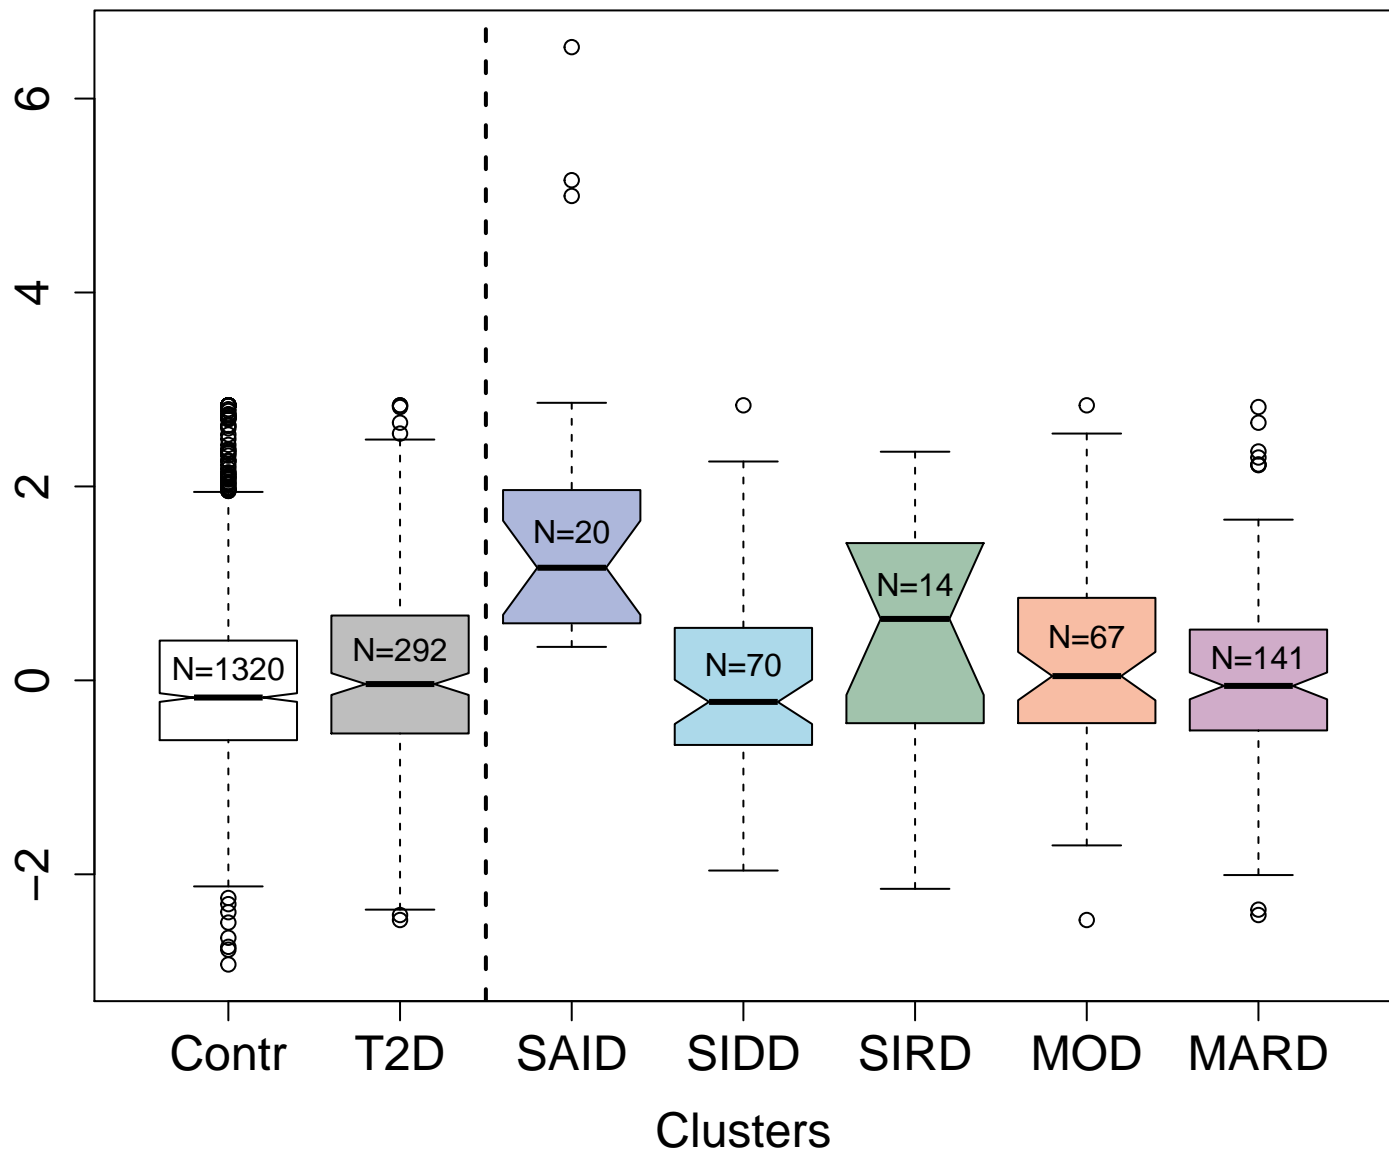

M48733 : vanillic alcohol sulfate

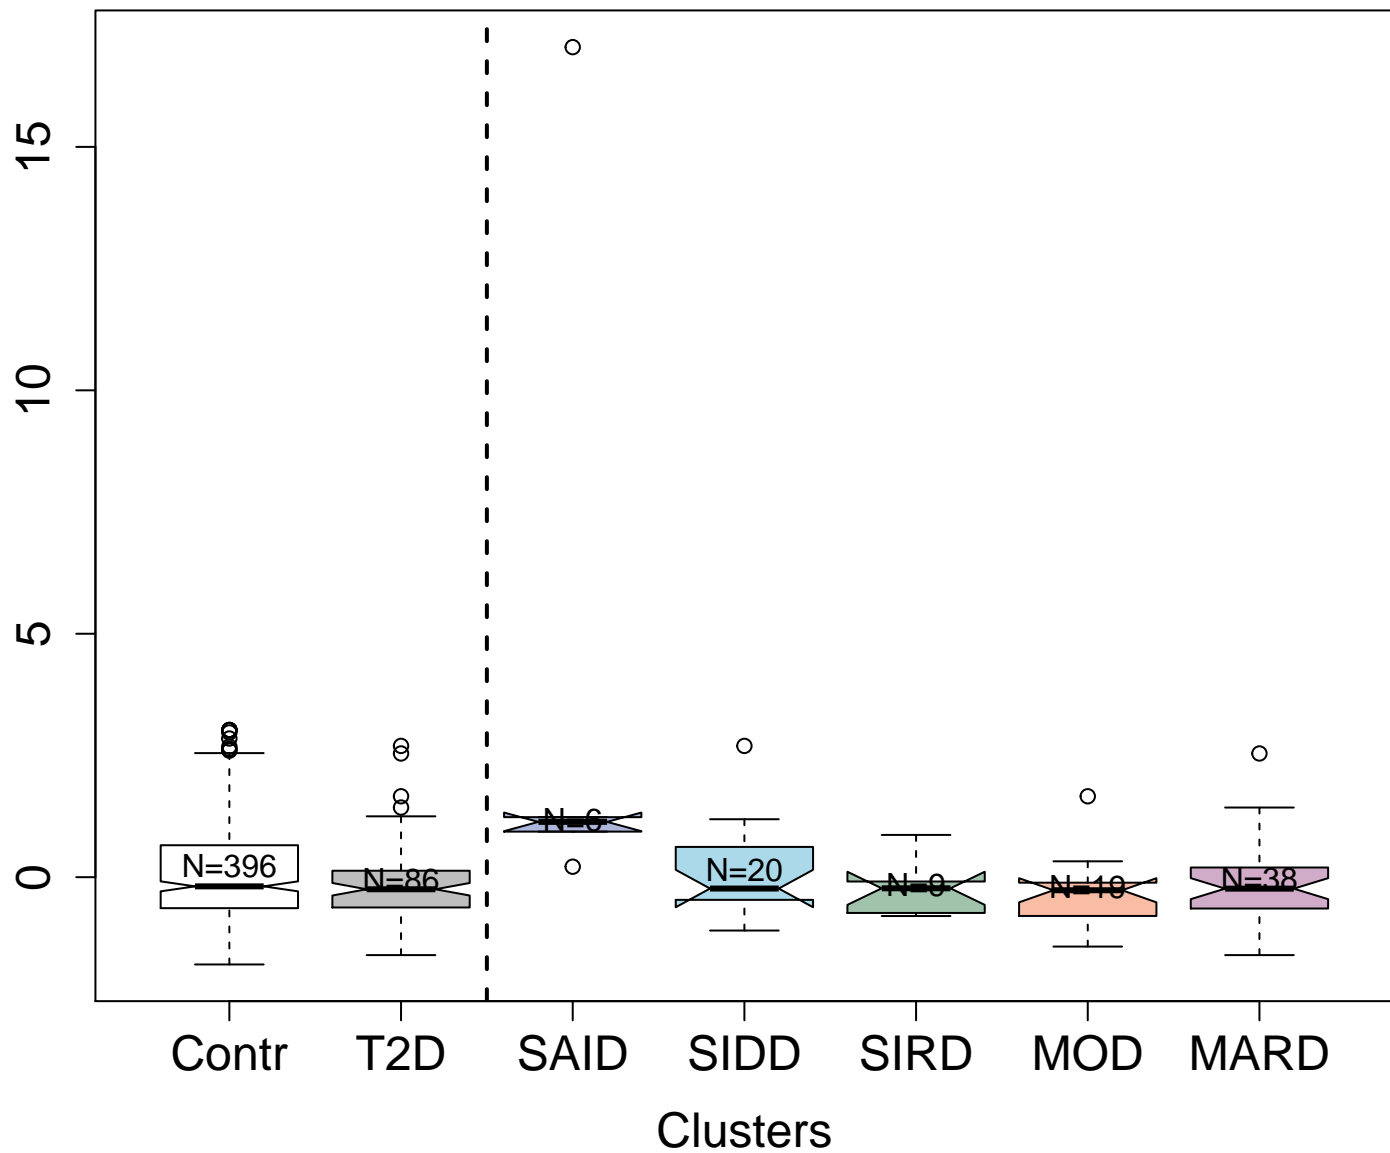

M35651 : ectoine

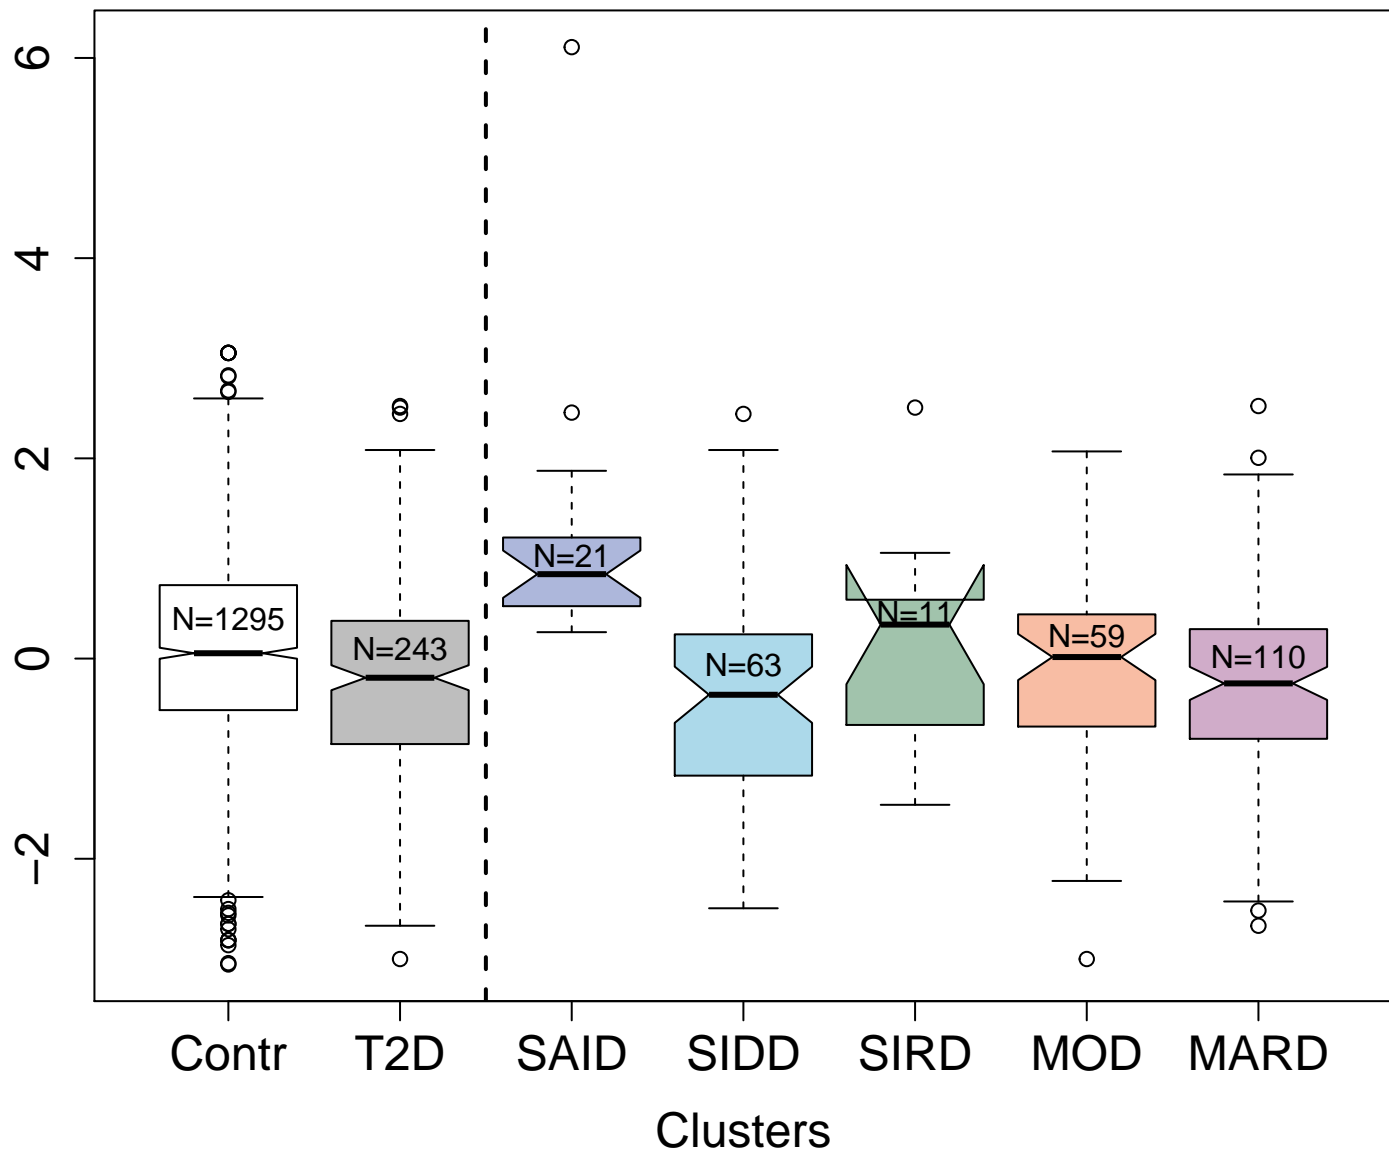

M47702 : X - 12127

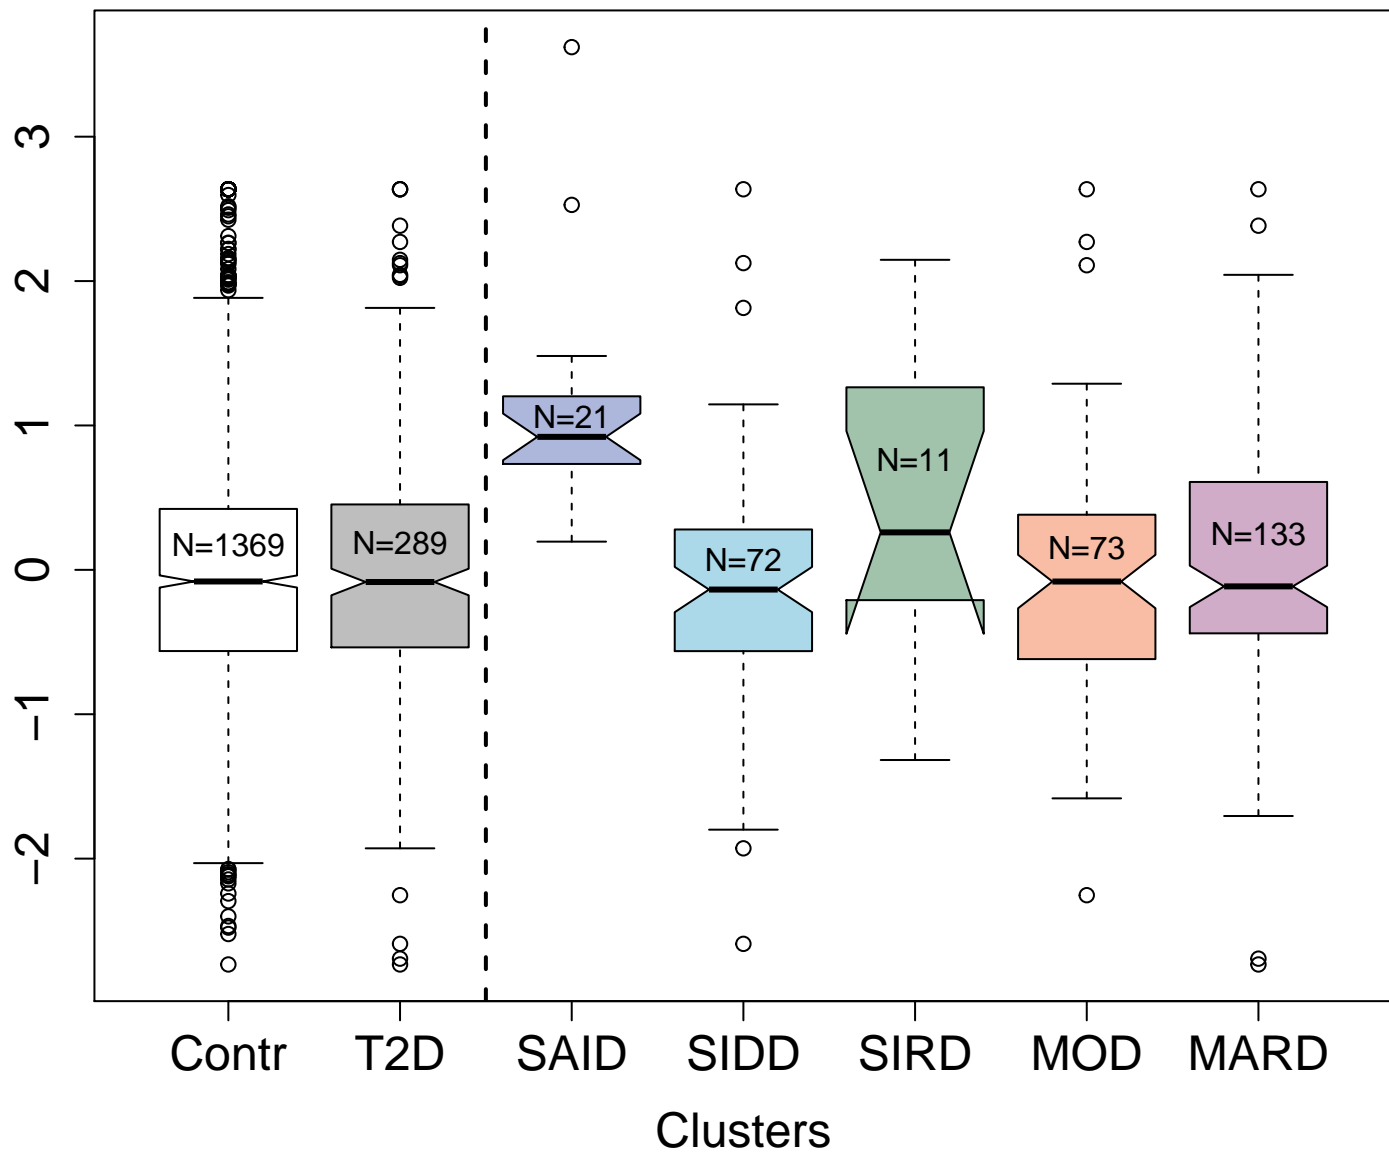

M57476 : sphingomyelin (d18:0/20:0, d16:0/22:0)\*

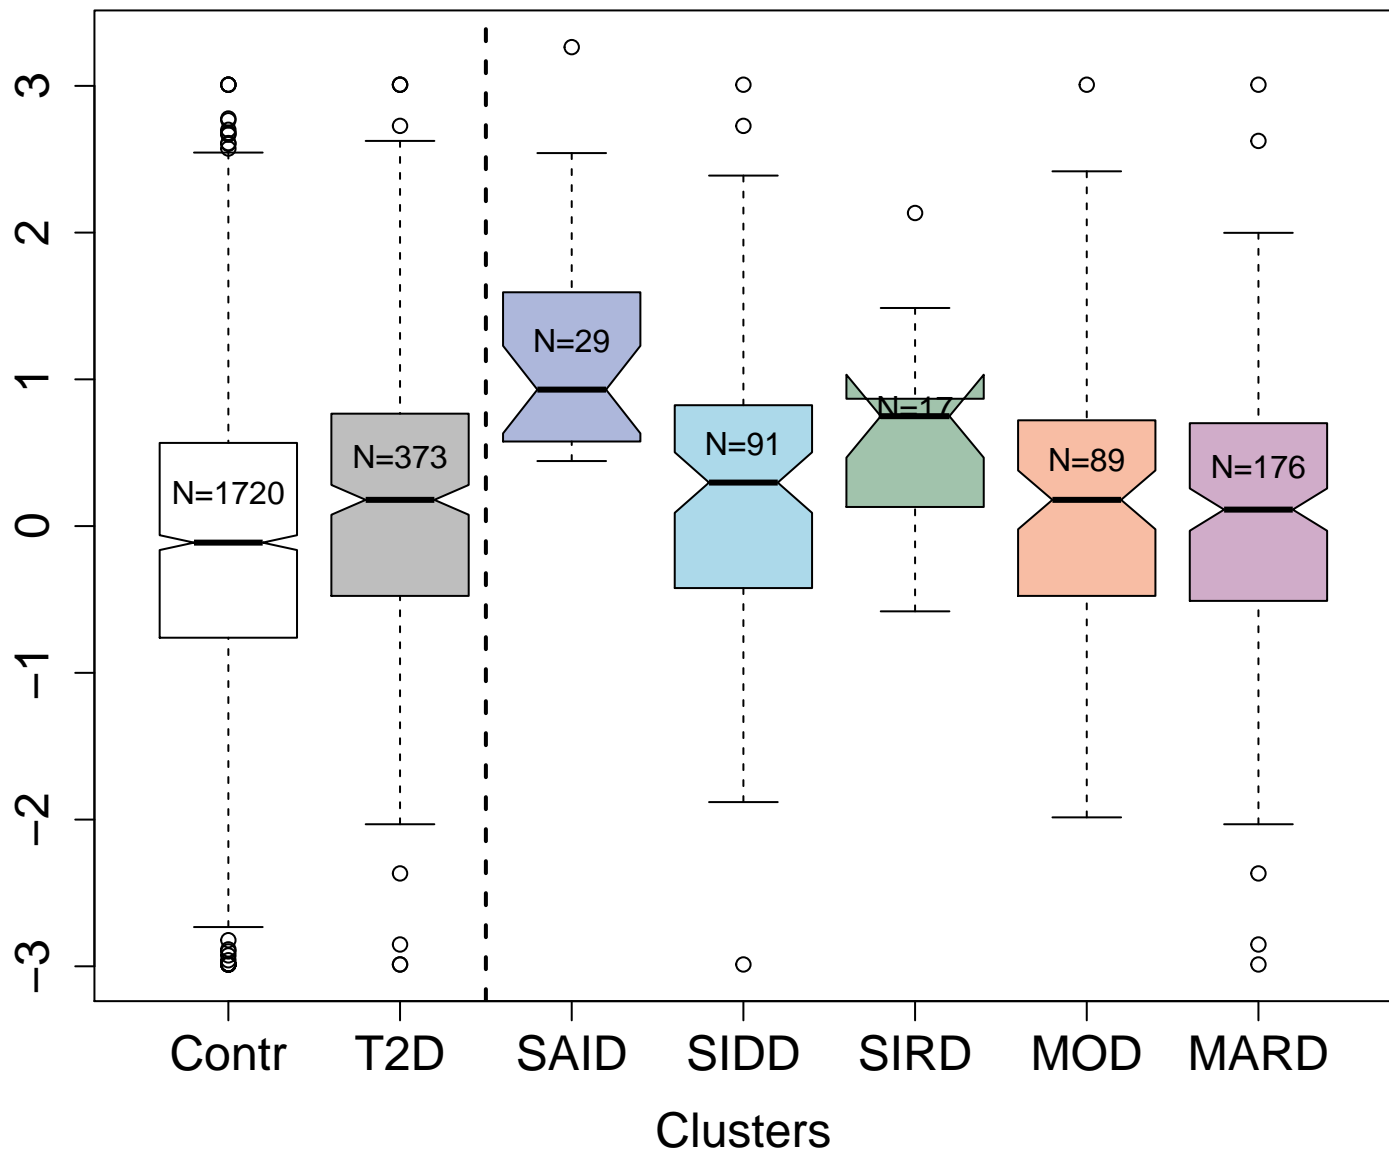

M63057 : picolinoylglycine

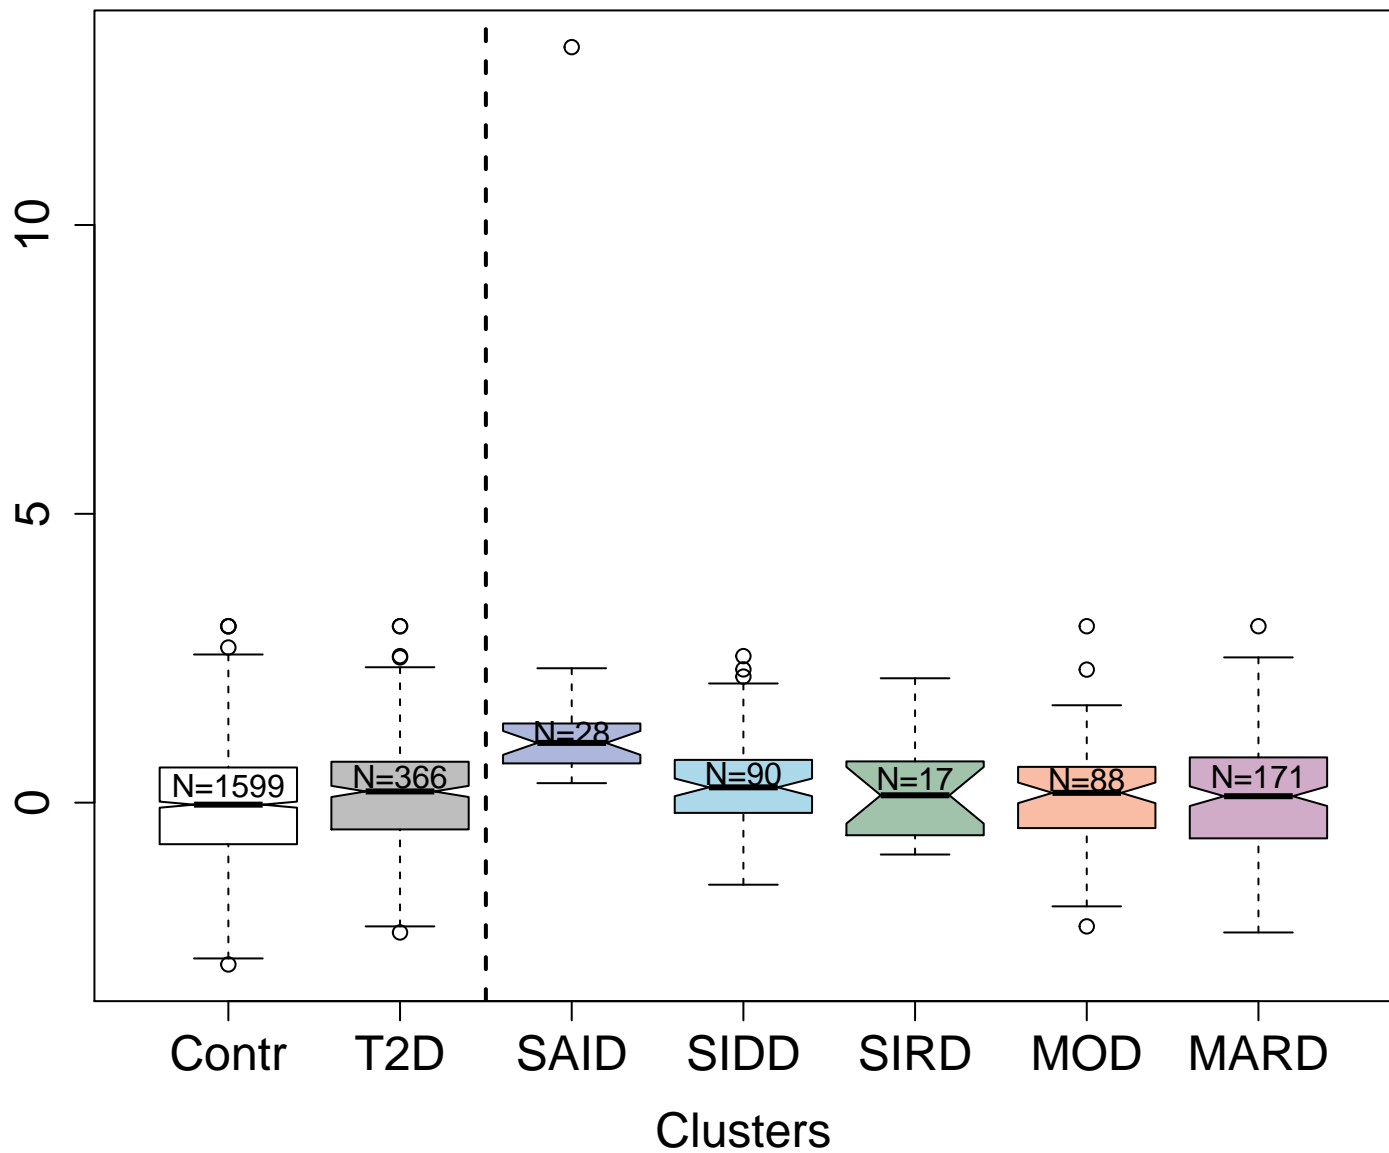

M53023 : X - 24608

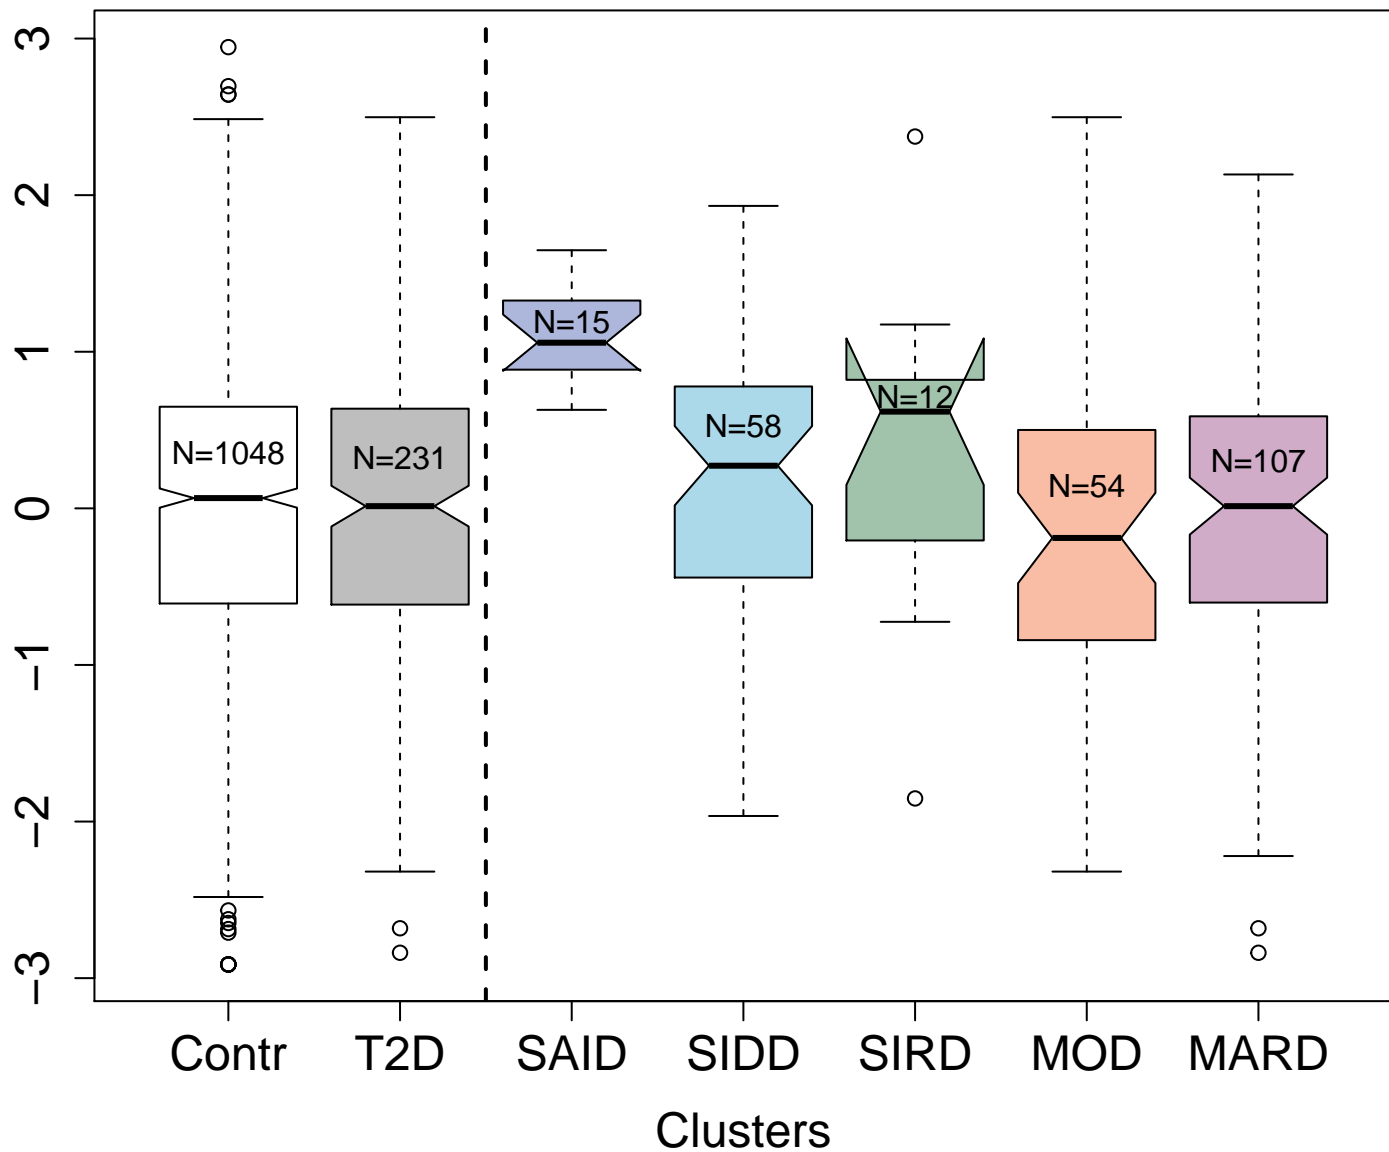



M48046 : X - 18838

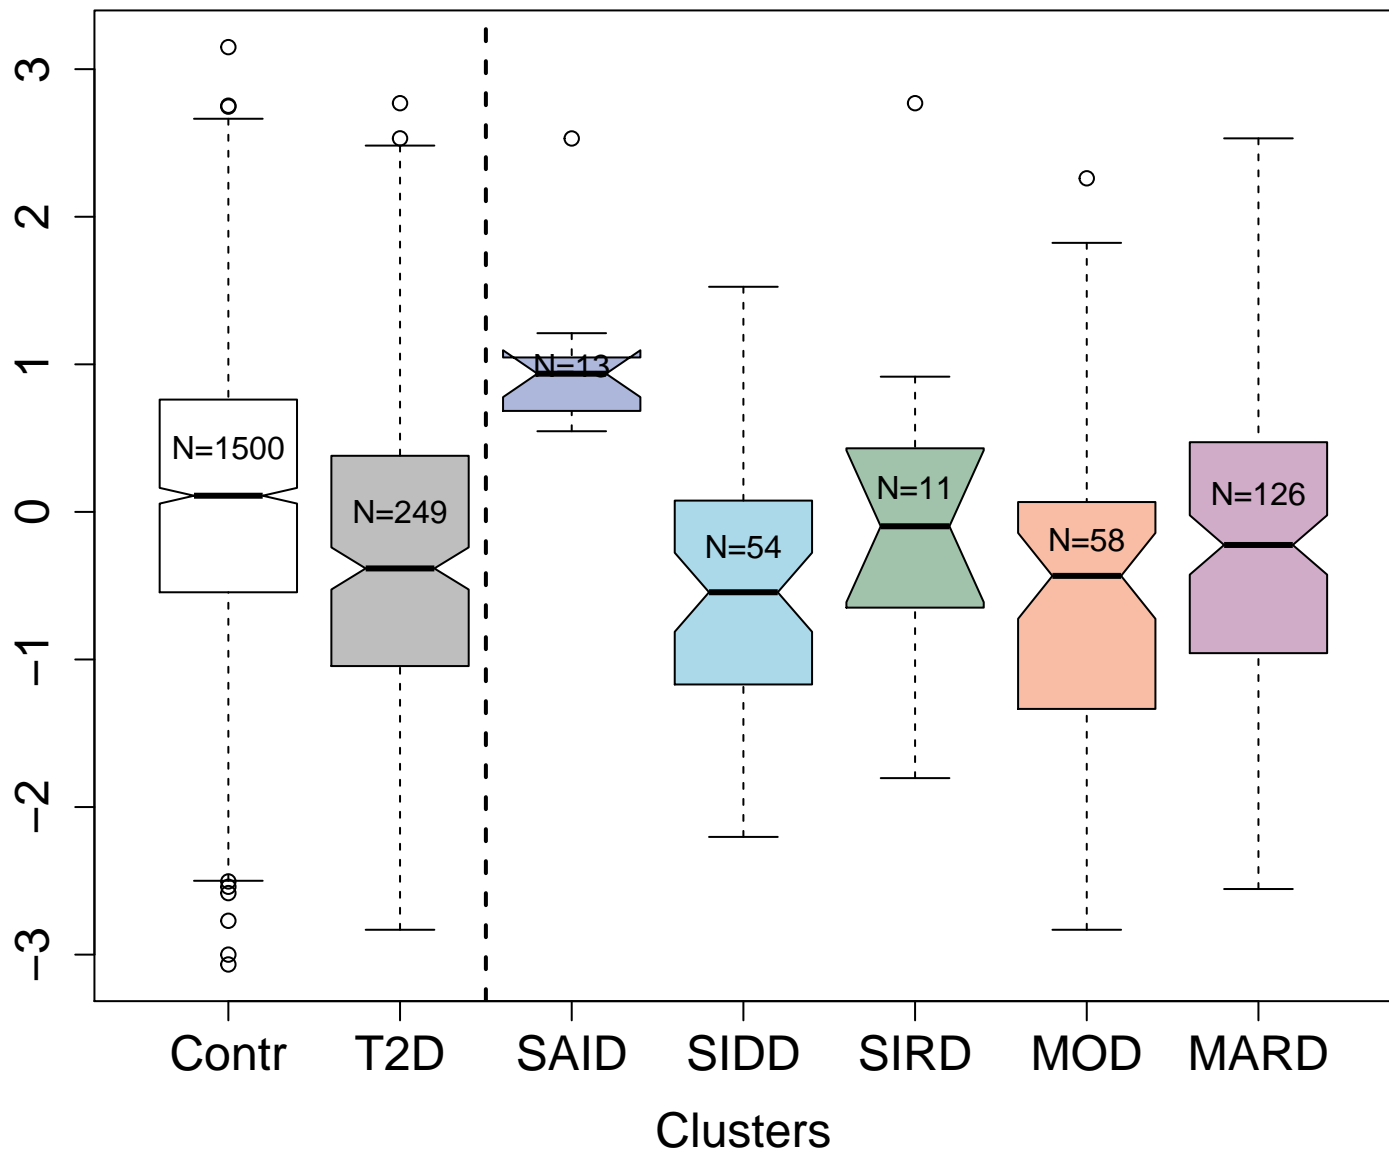

M46486 : X - 21441

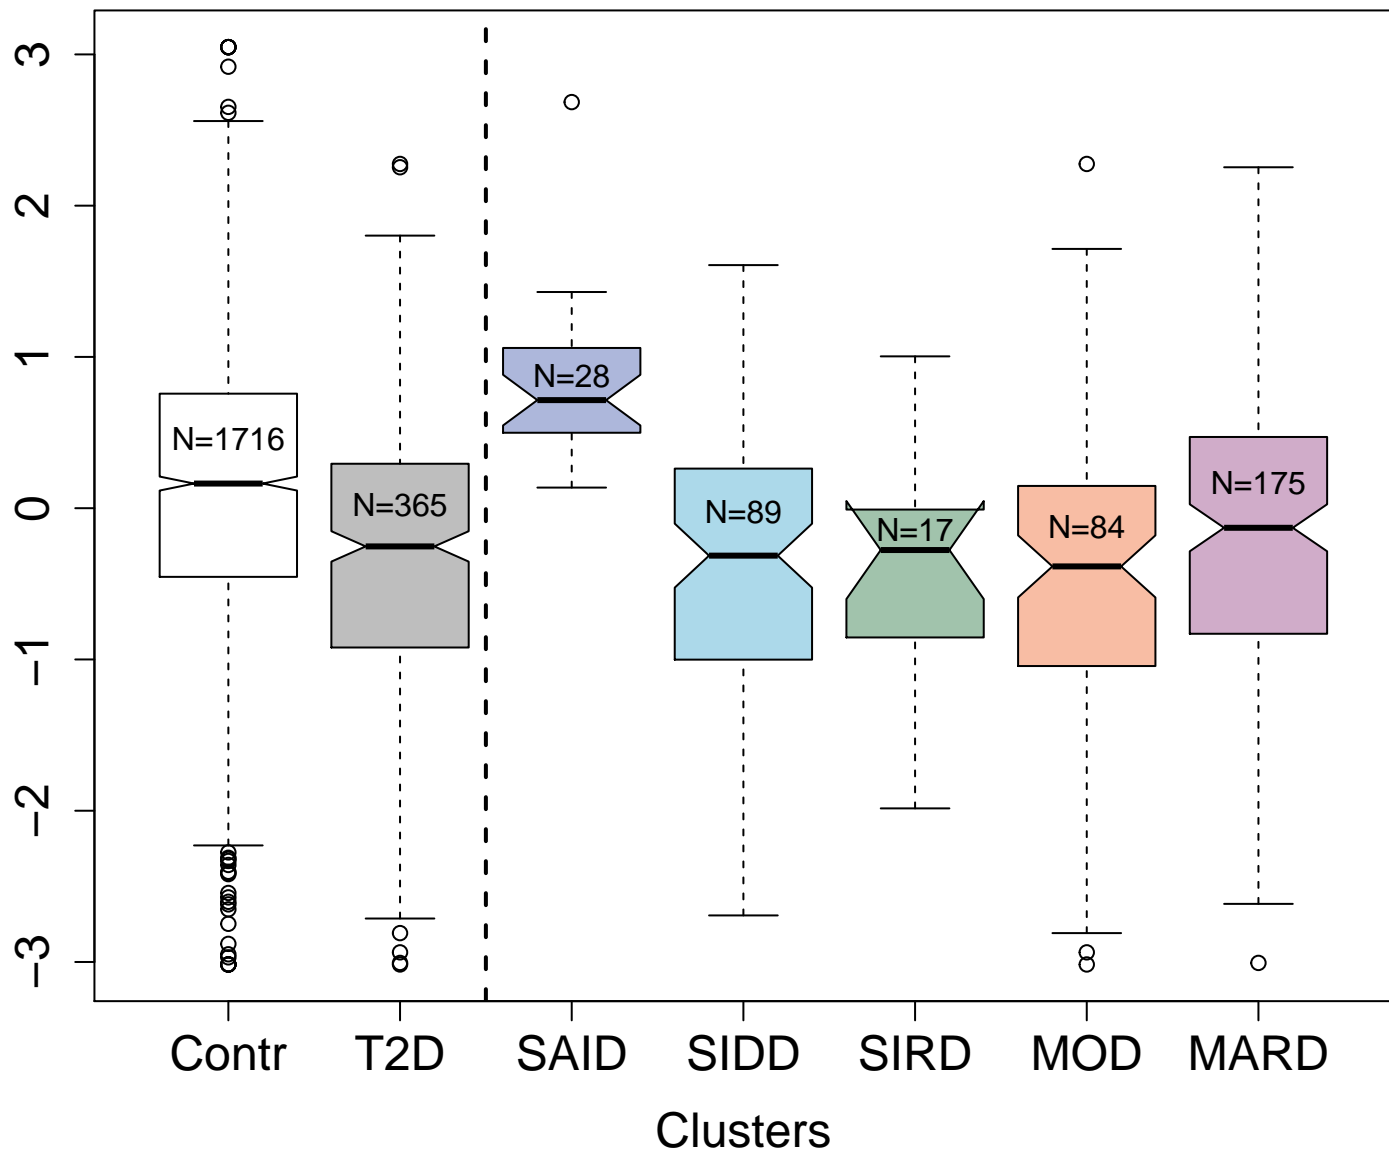

M6146 : 2-aminoadipate

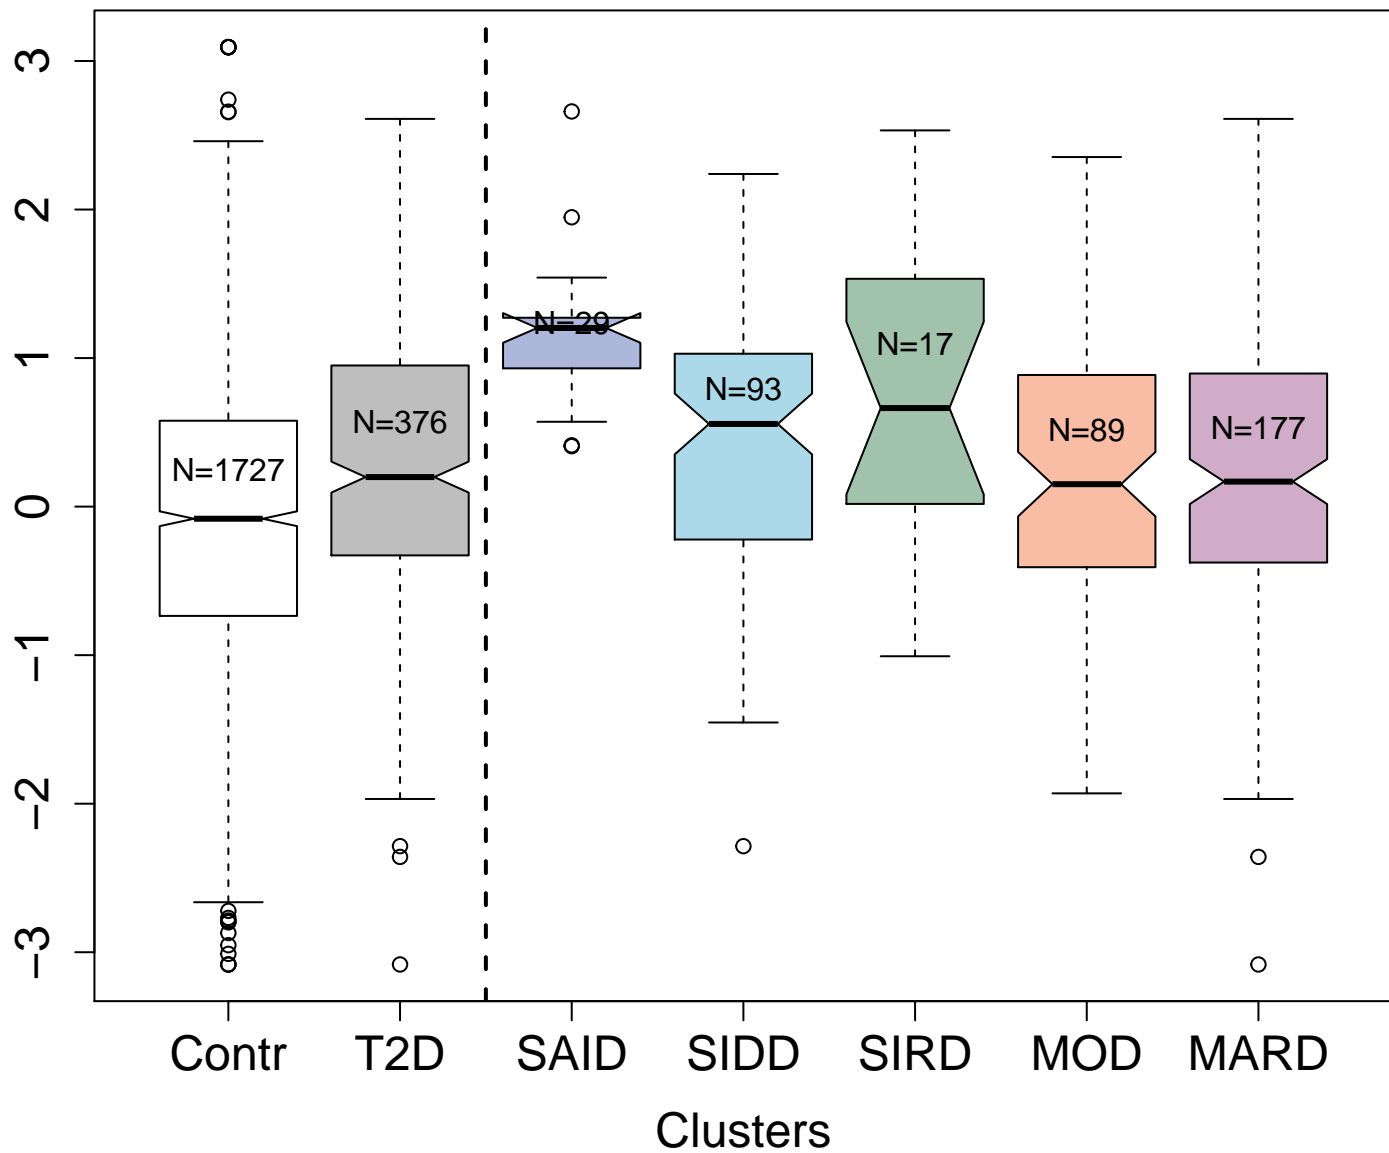

M1512 : picolinate

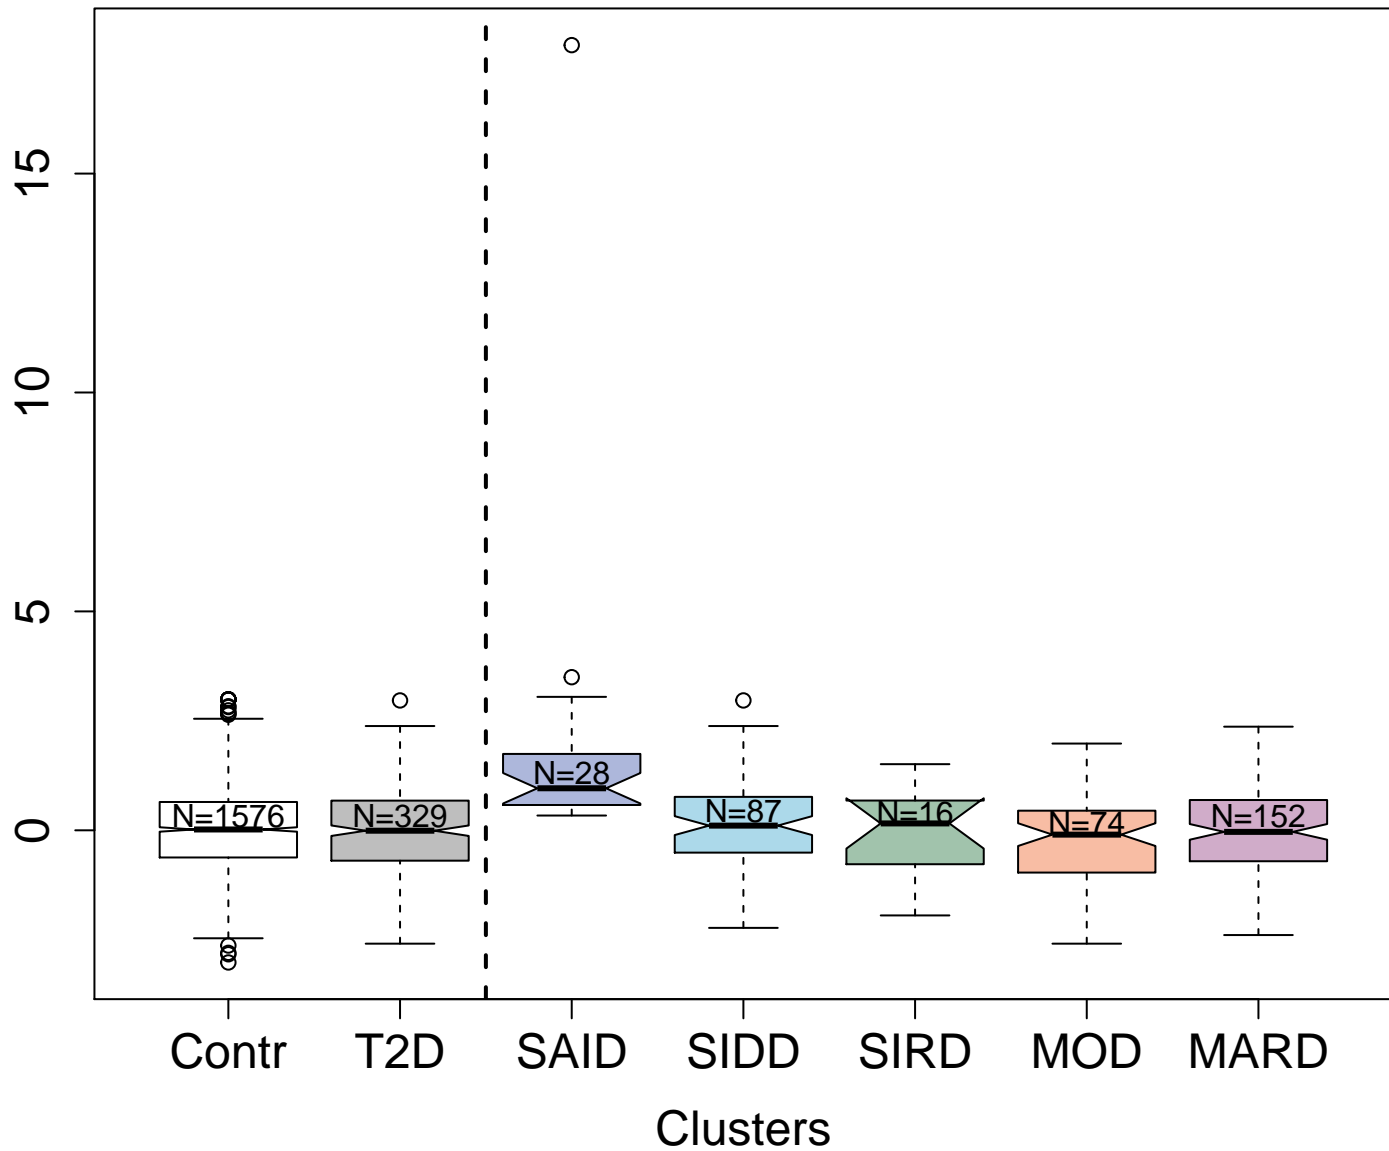

M21239 : 8-hydroxyoctanoate

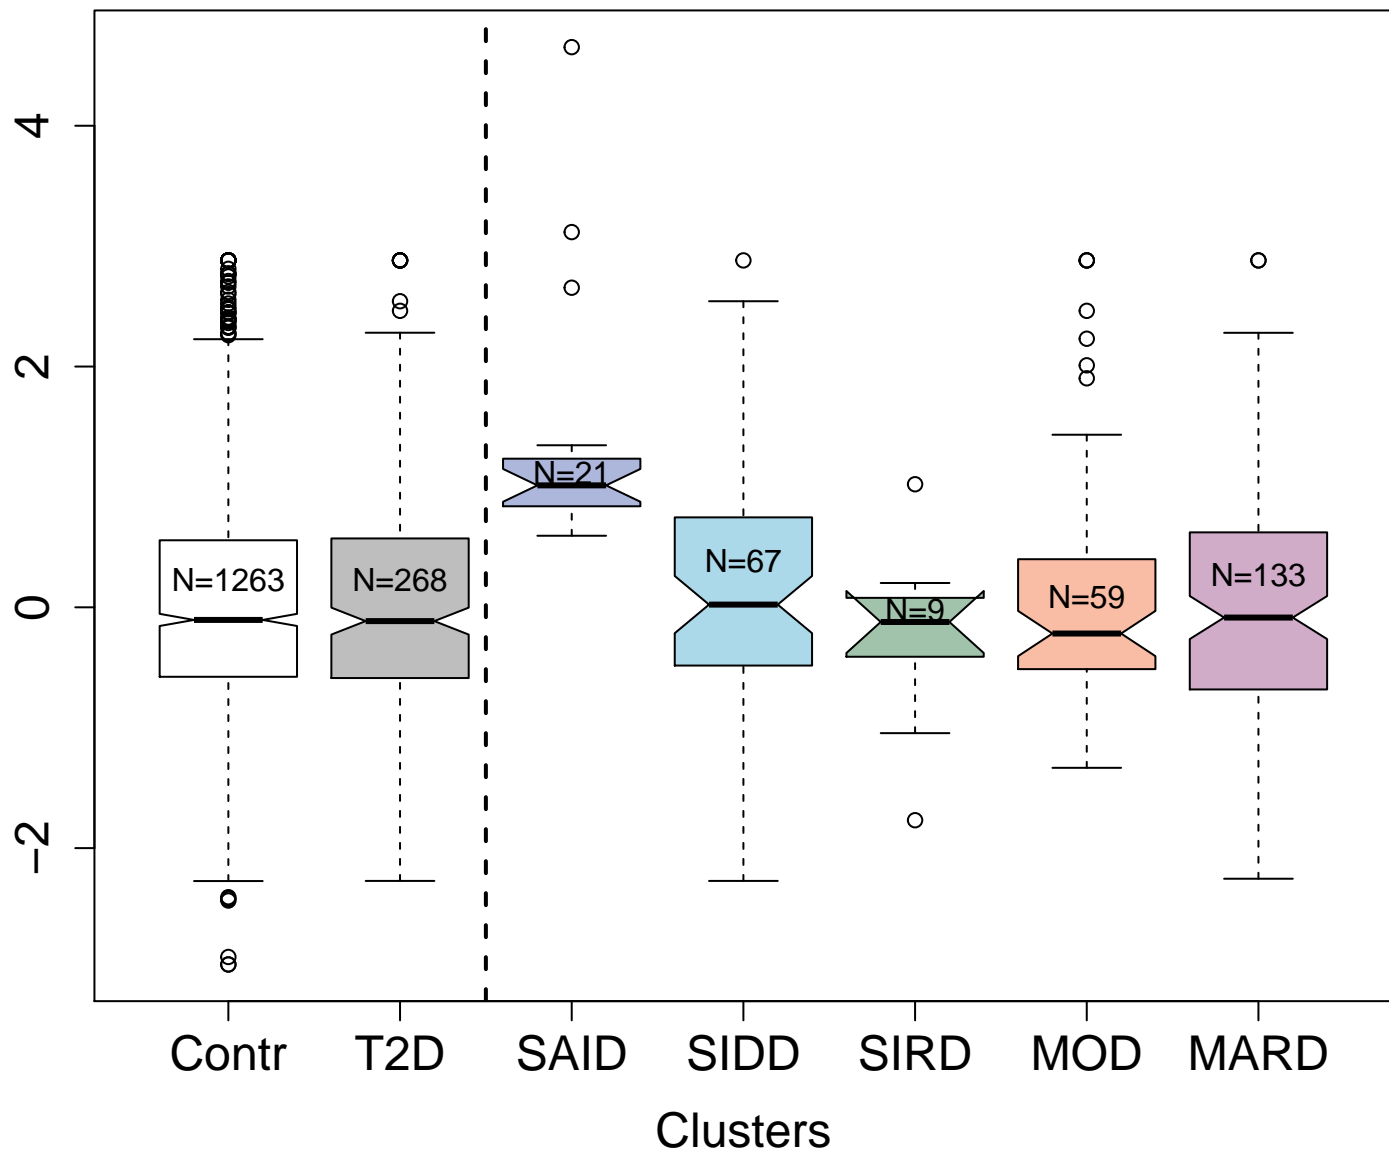

M54979 : N-stearoyl-sphingosine (d18:1/18:0)\*

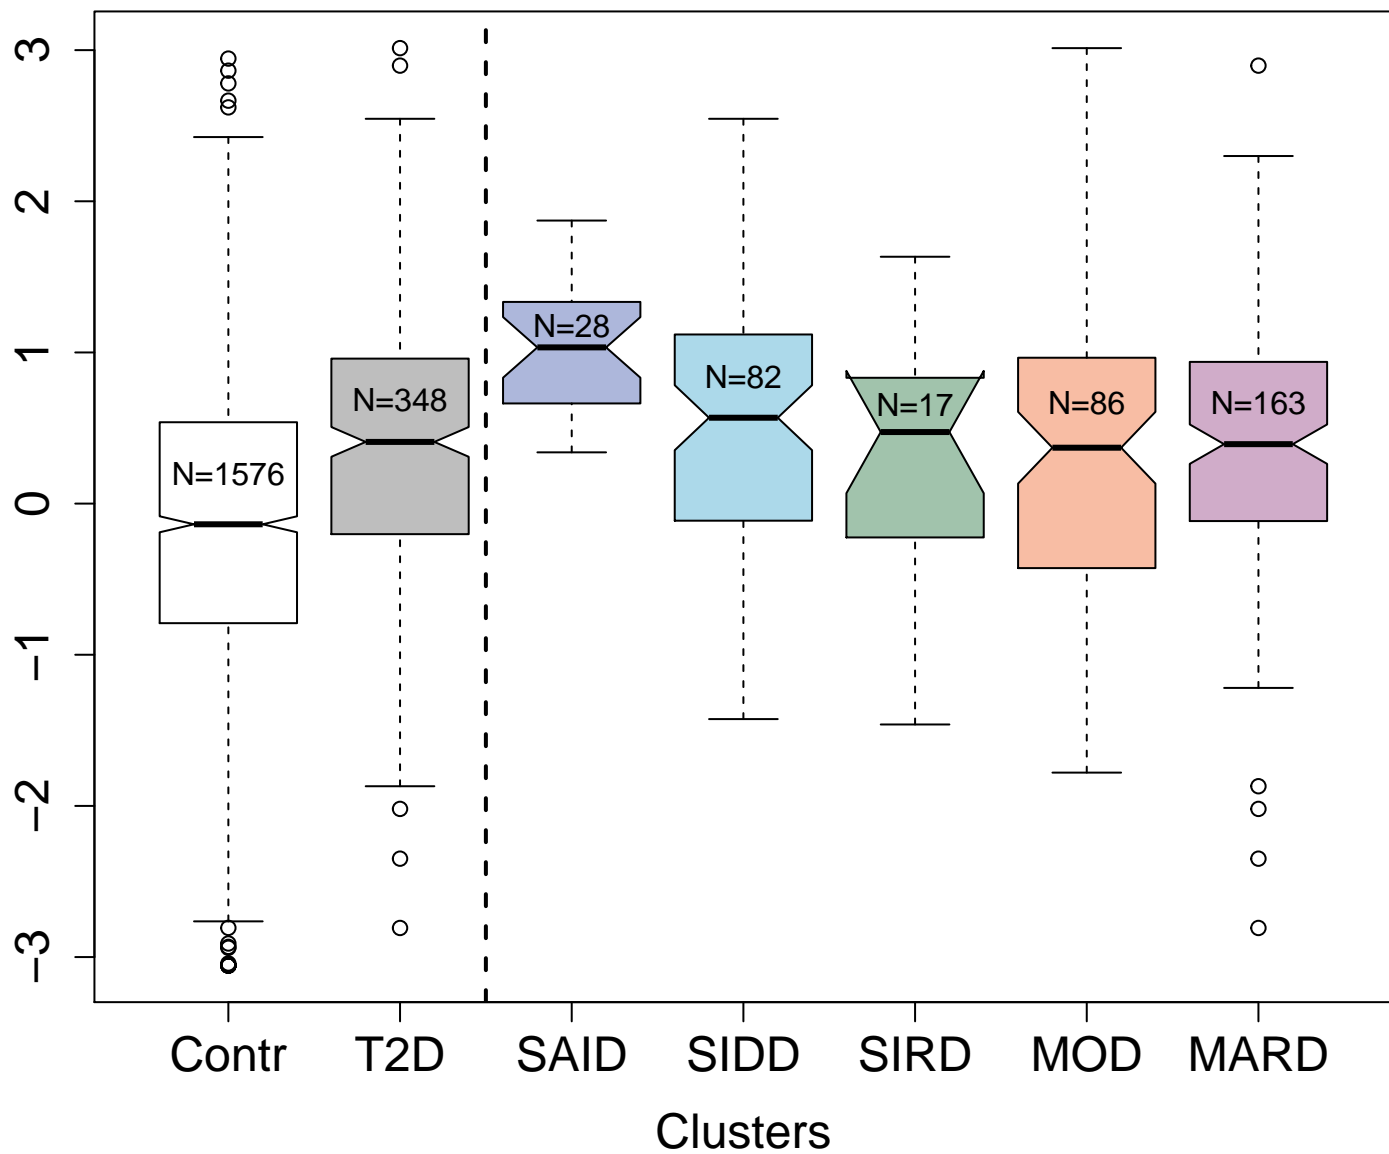

M33447 : palmitoleate (16:1n7)

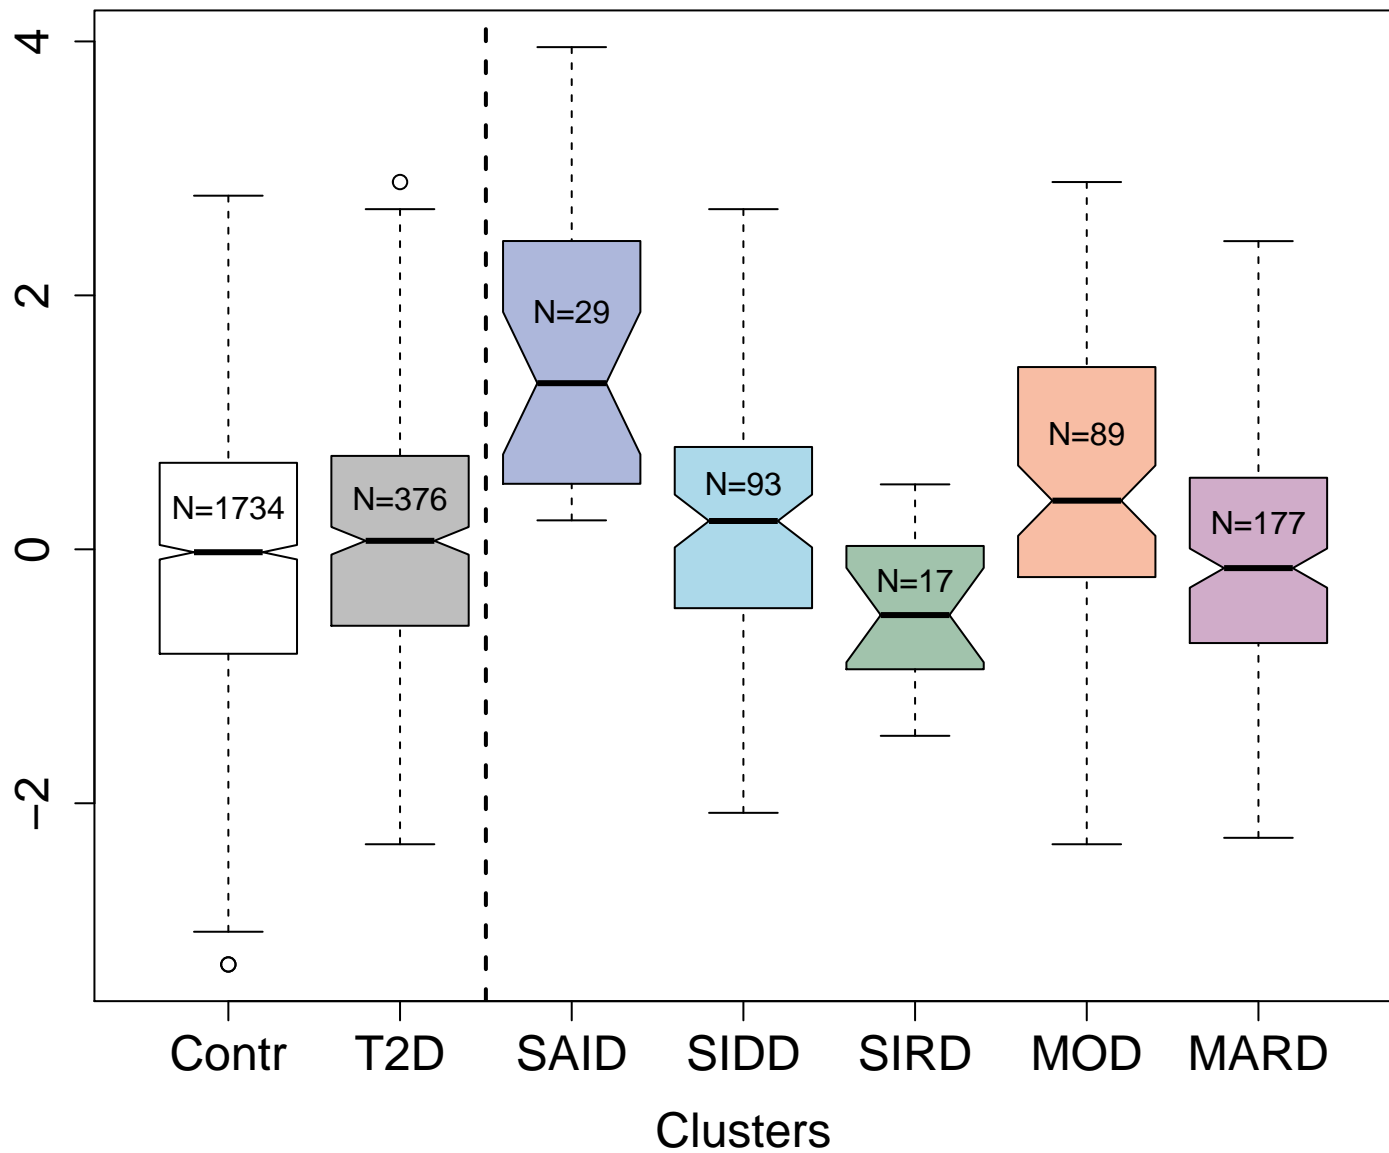

M46488 : X - 11847

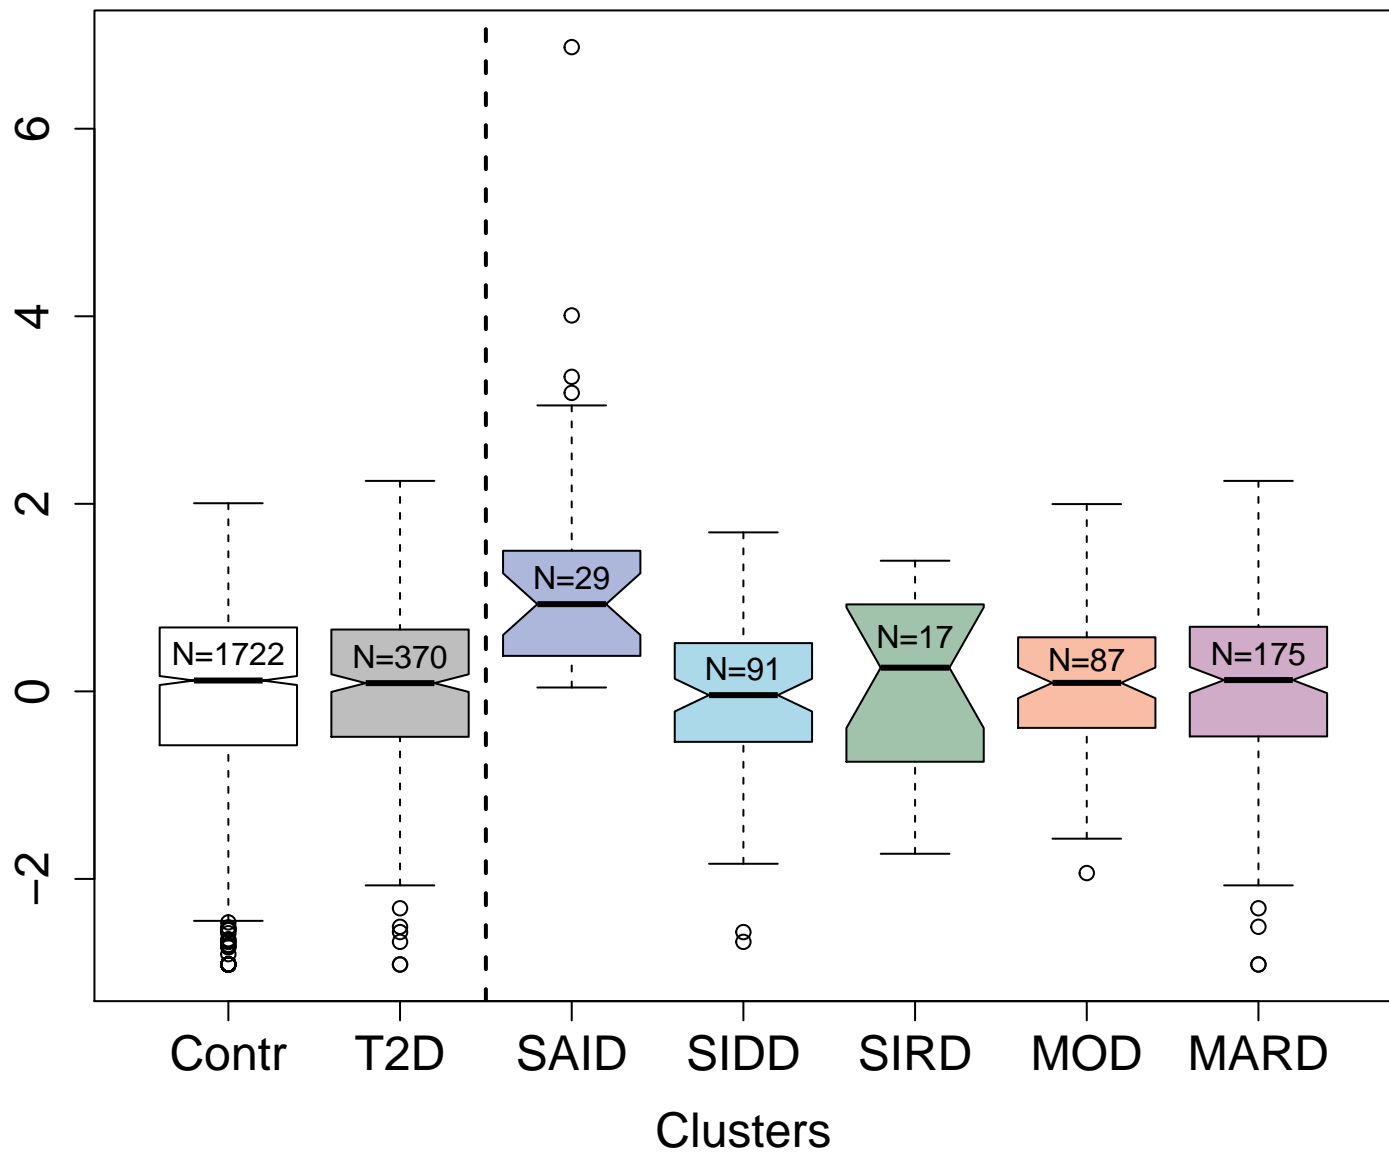



M1572 : glycerate

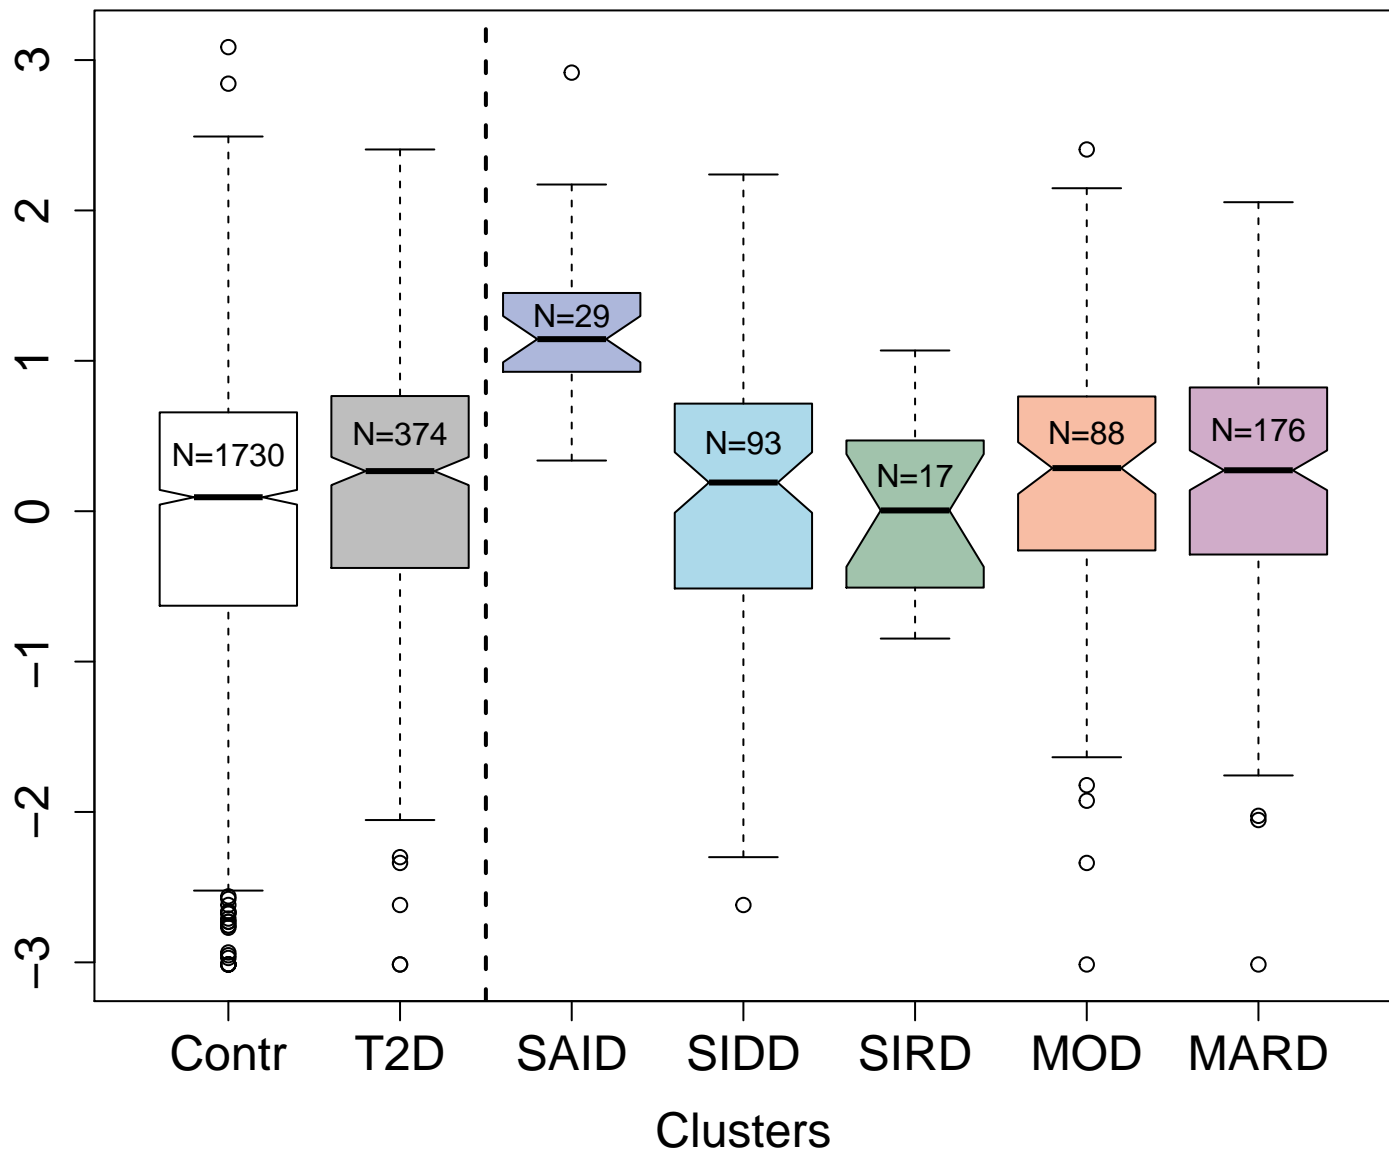

M63583 : 3-indoleglyoxylic acid

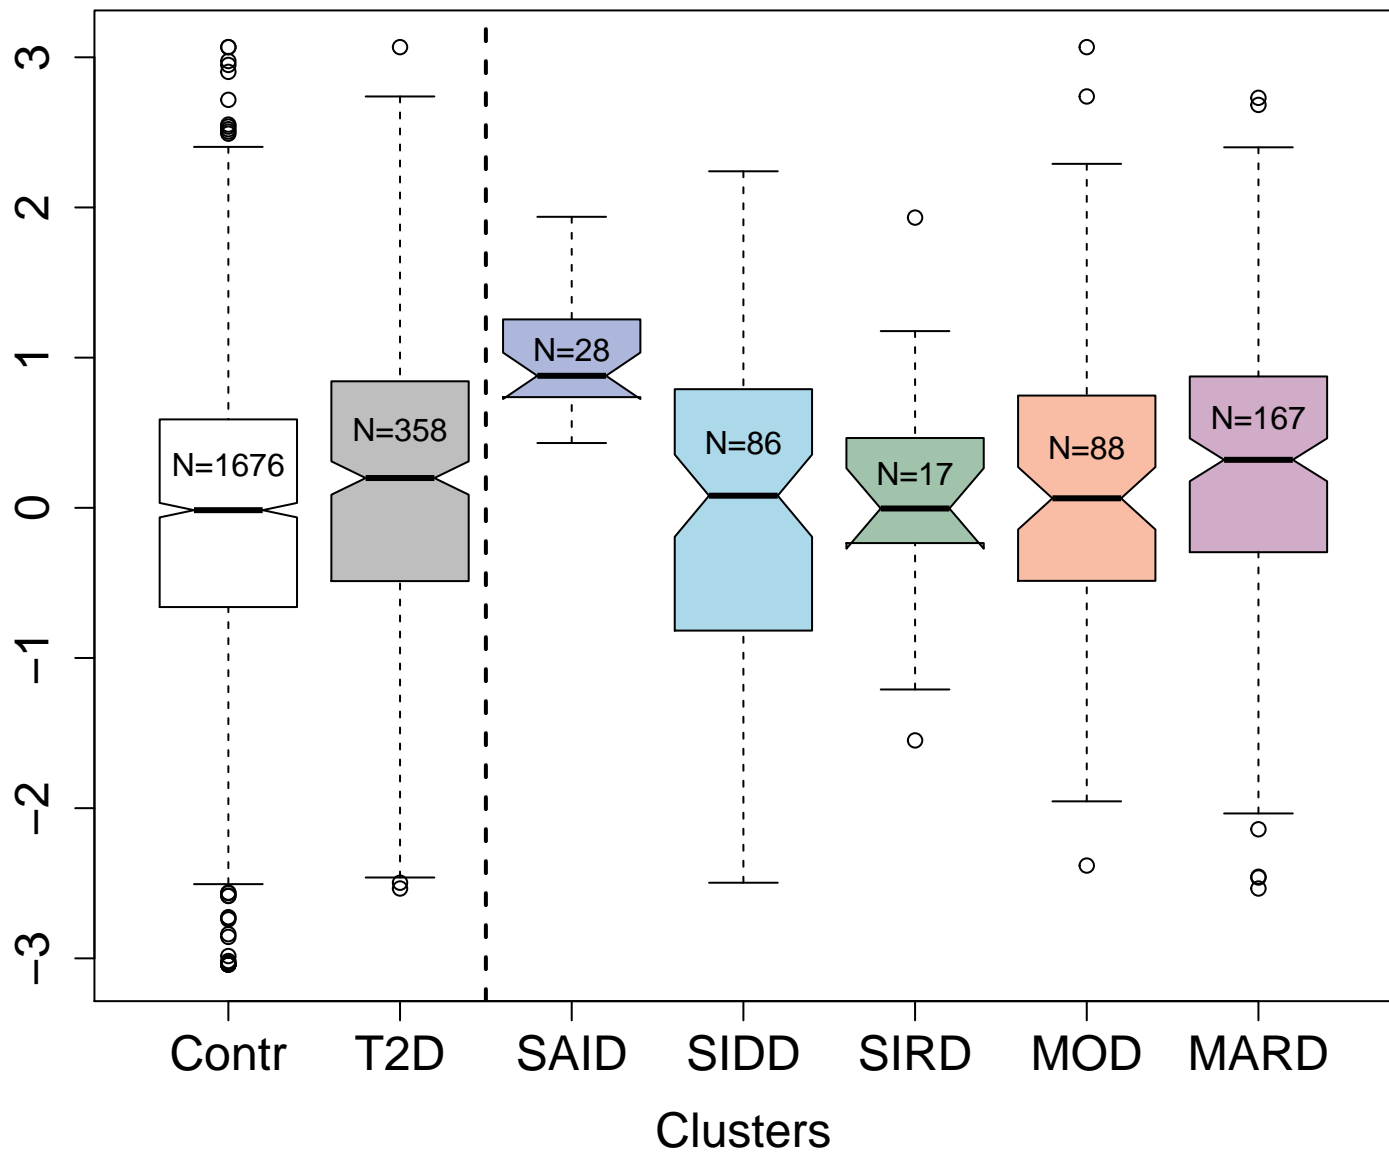

M15681 : 4-guanidinobutanoate

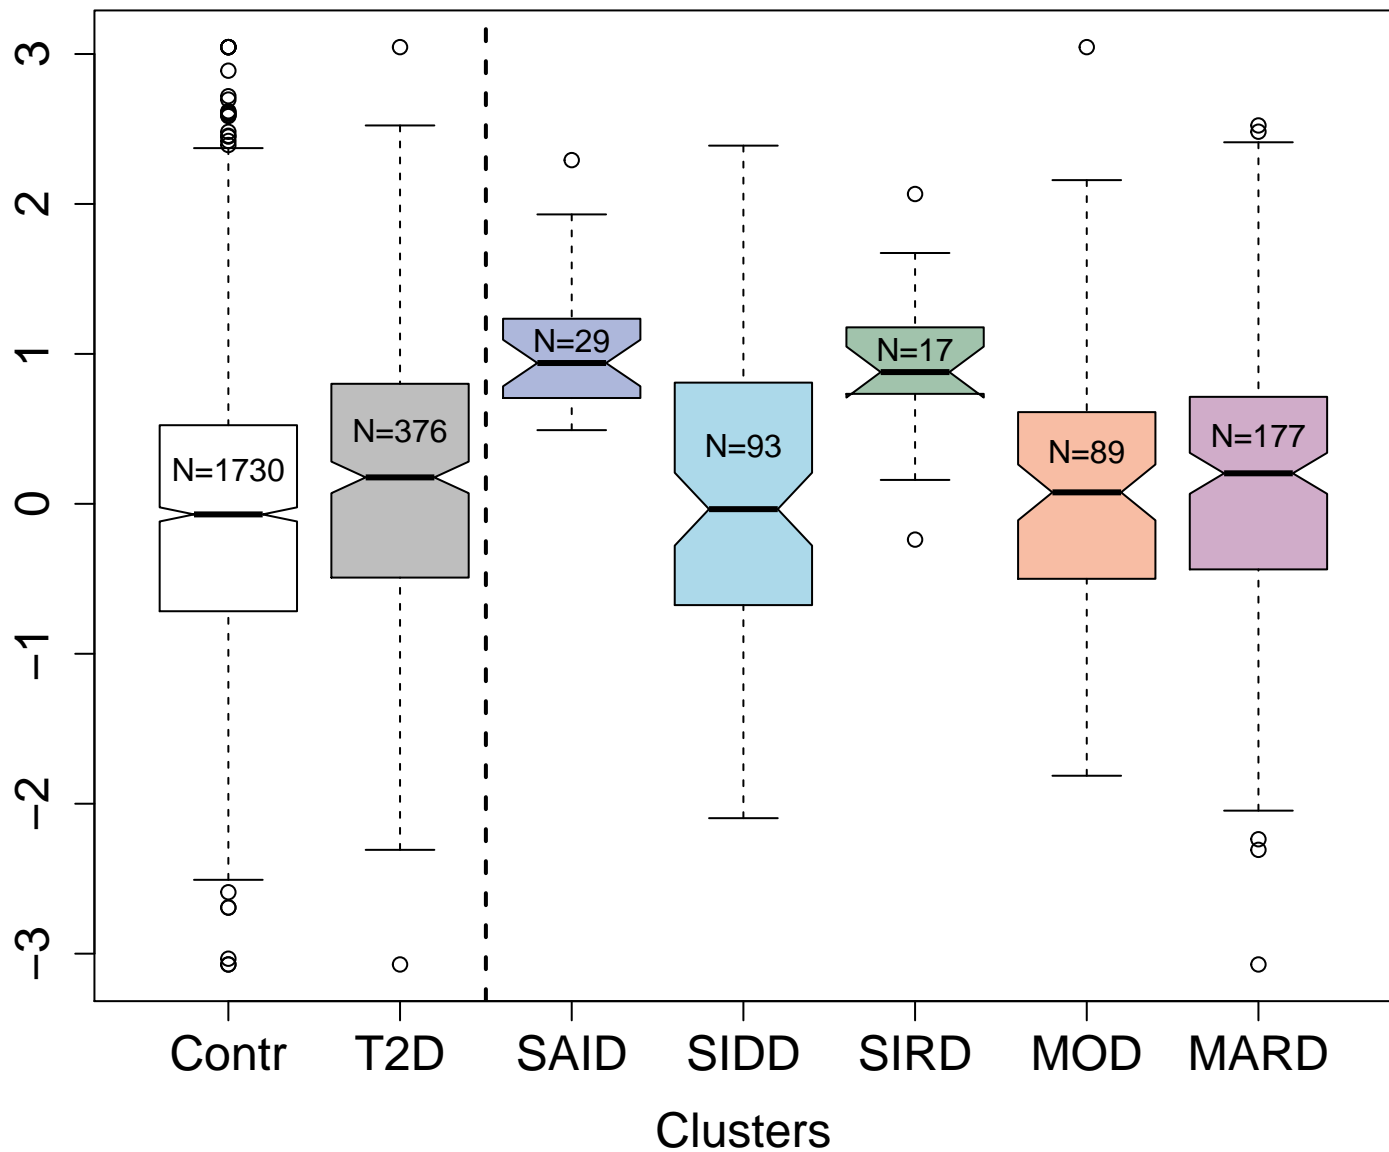

M63908 : X - 25957

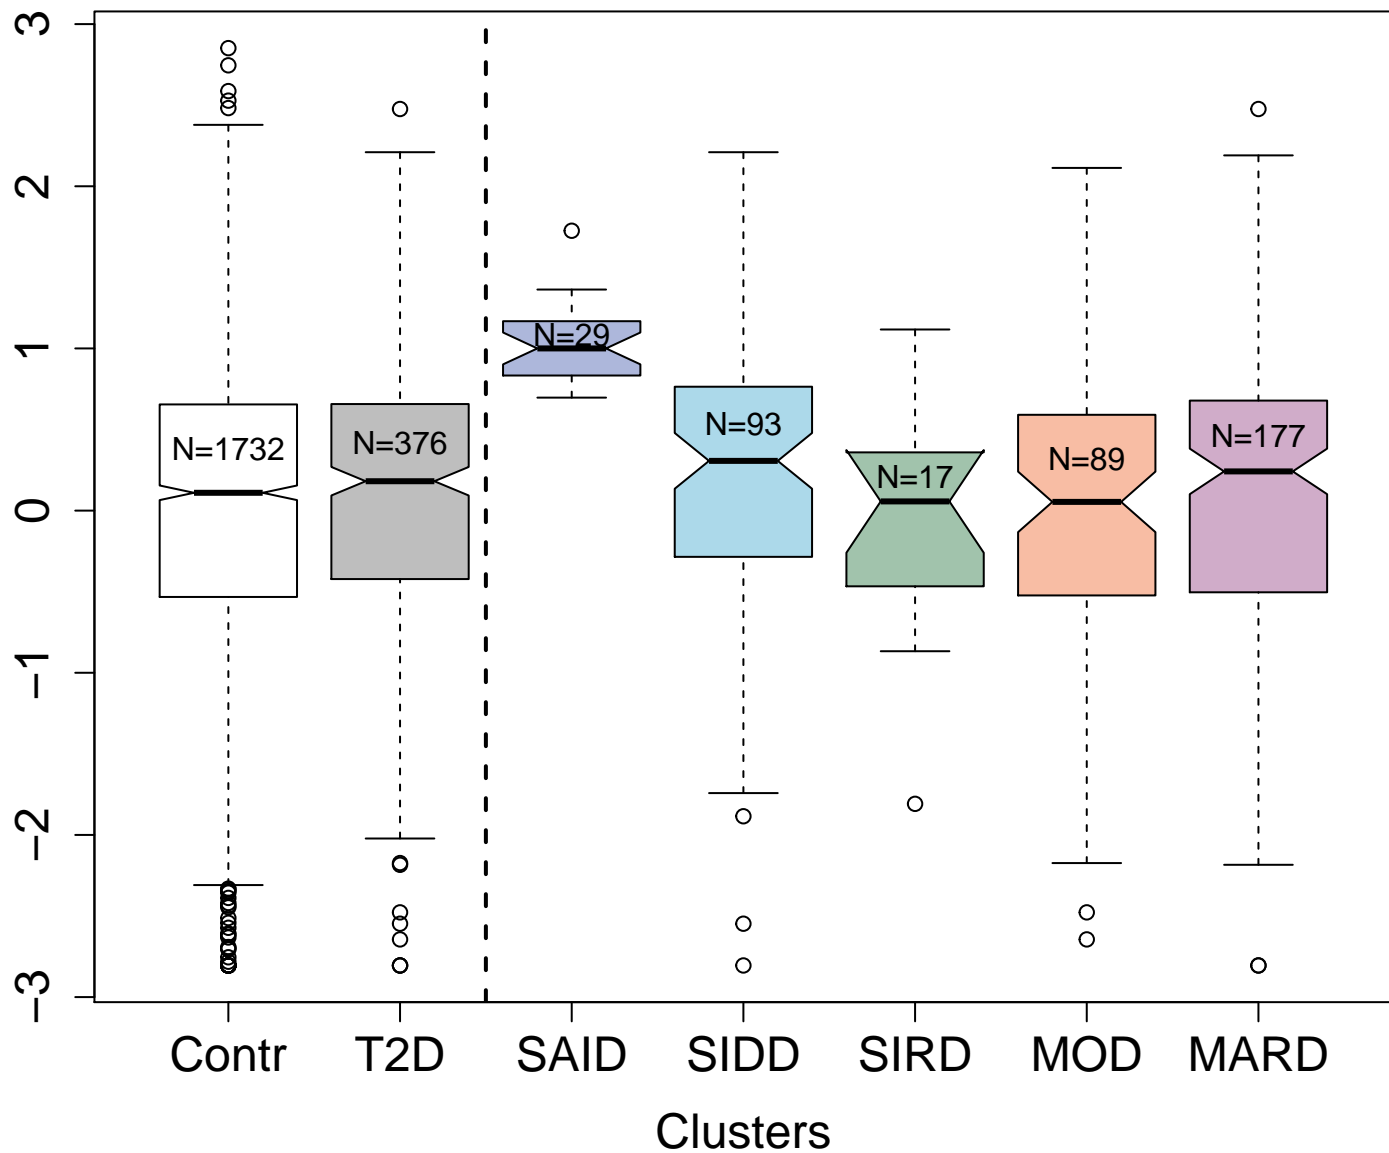

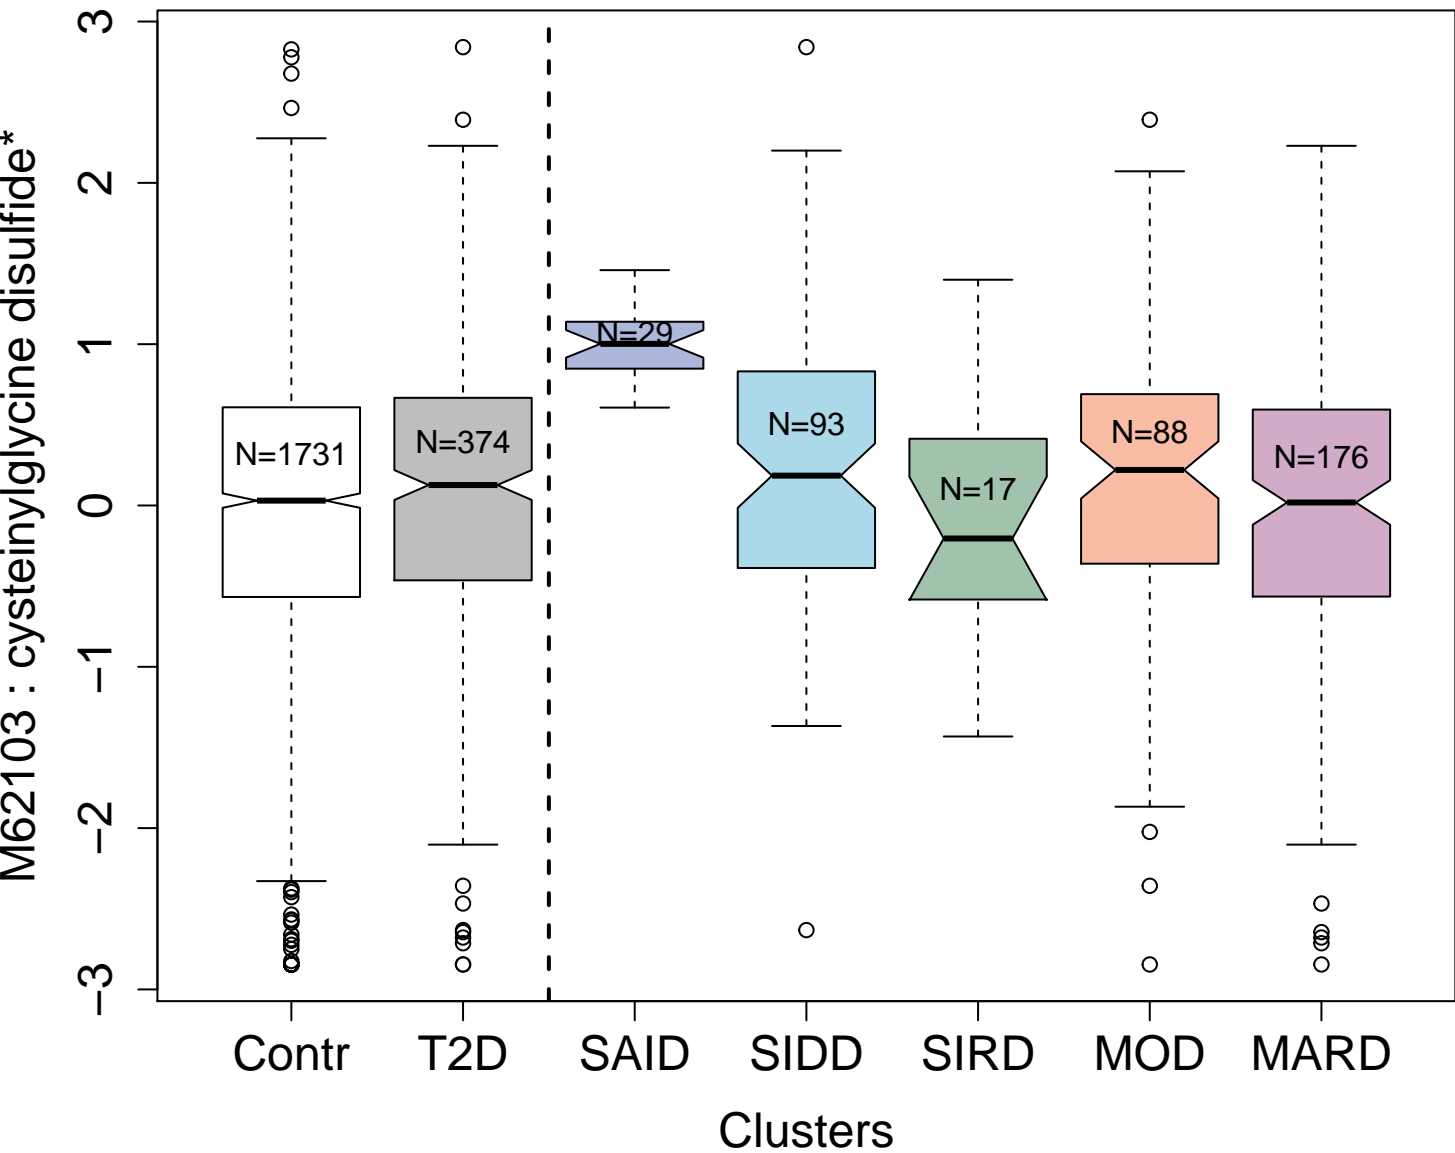

M3127 : hypoxanthine

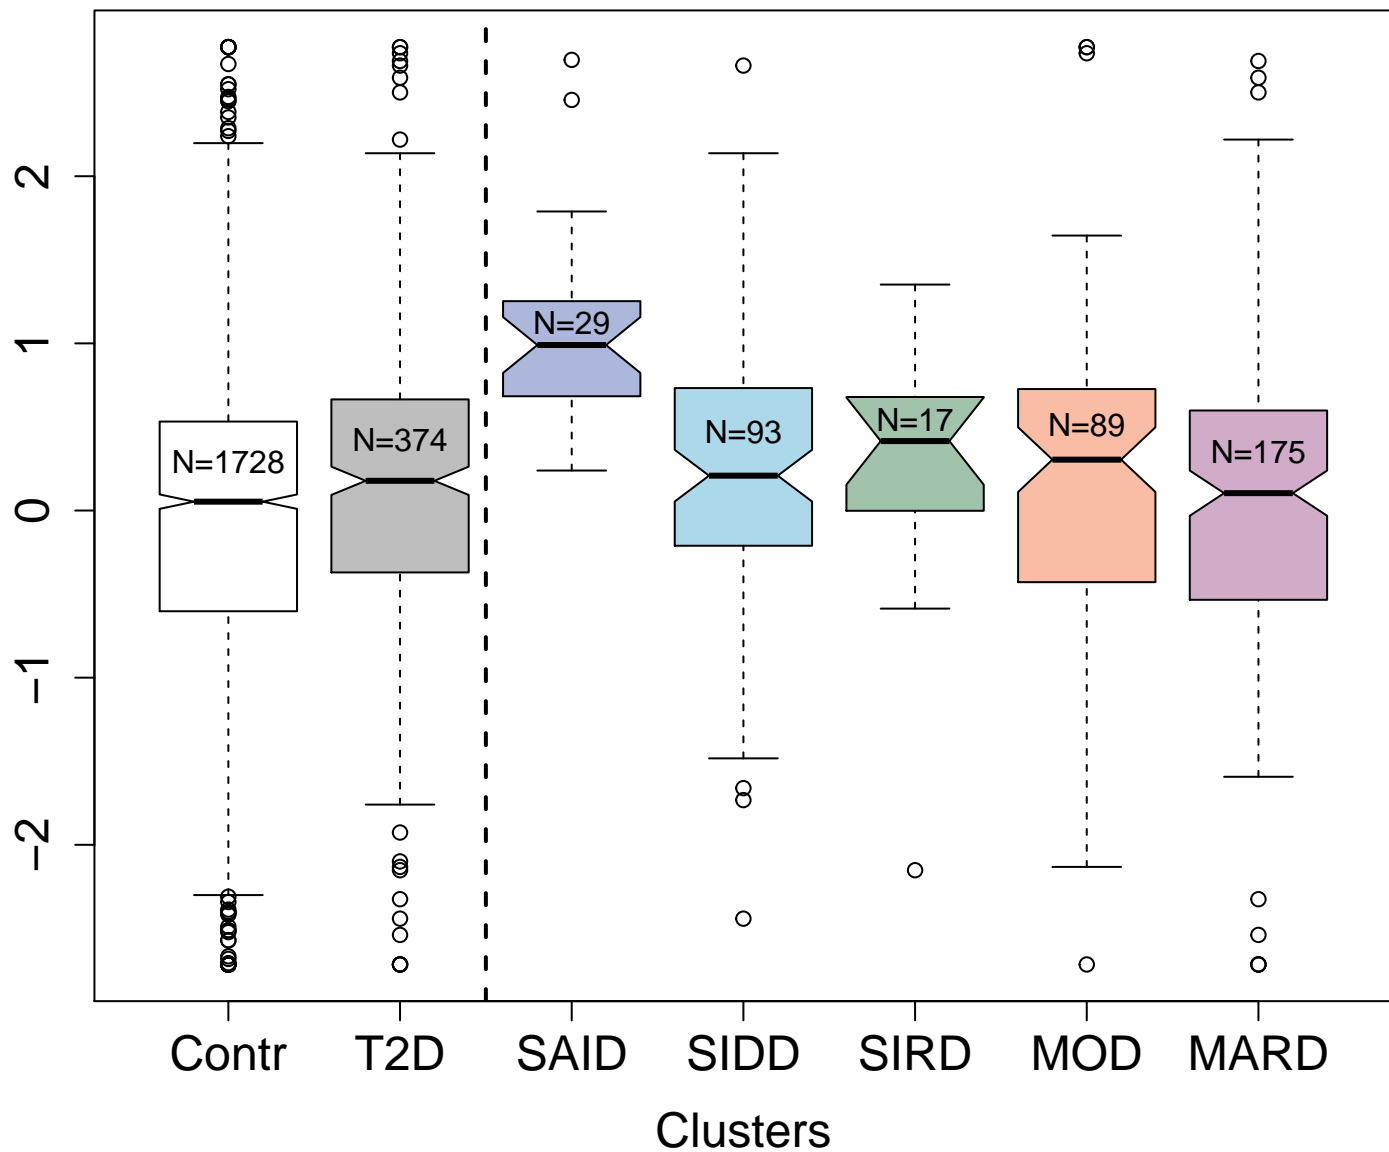

M32452 : propionylcarnitine (C3)

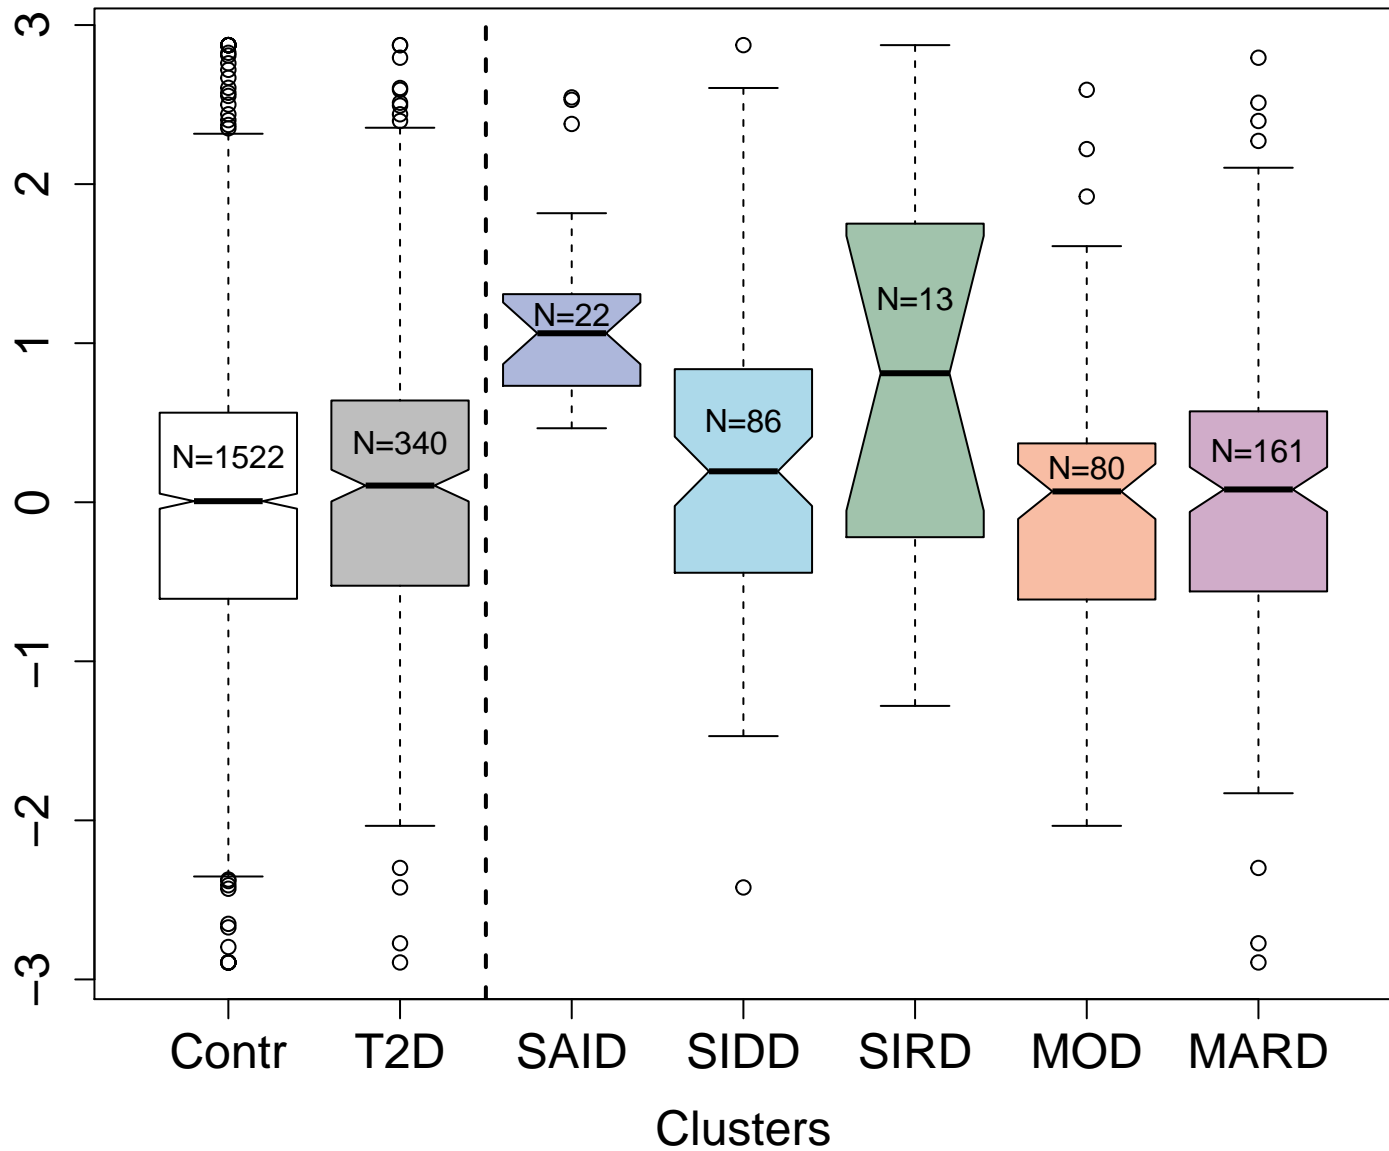

M52669 : 1-palmitoyl-2-oleoyl-GPI (16:0/18:1)\*

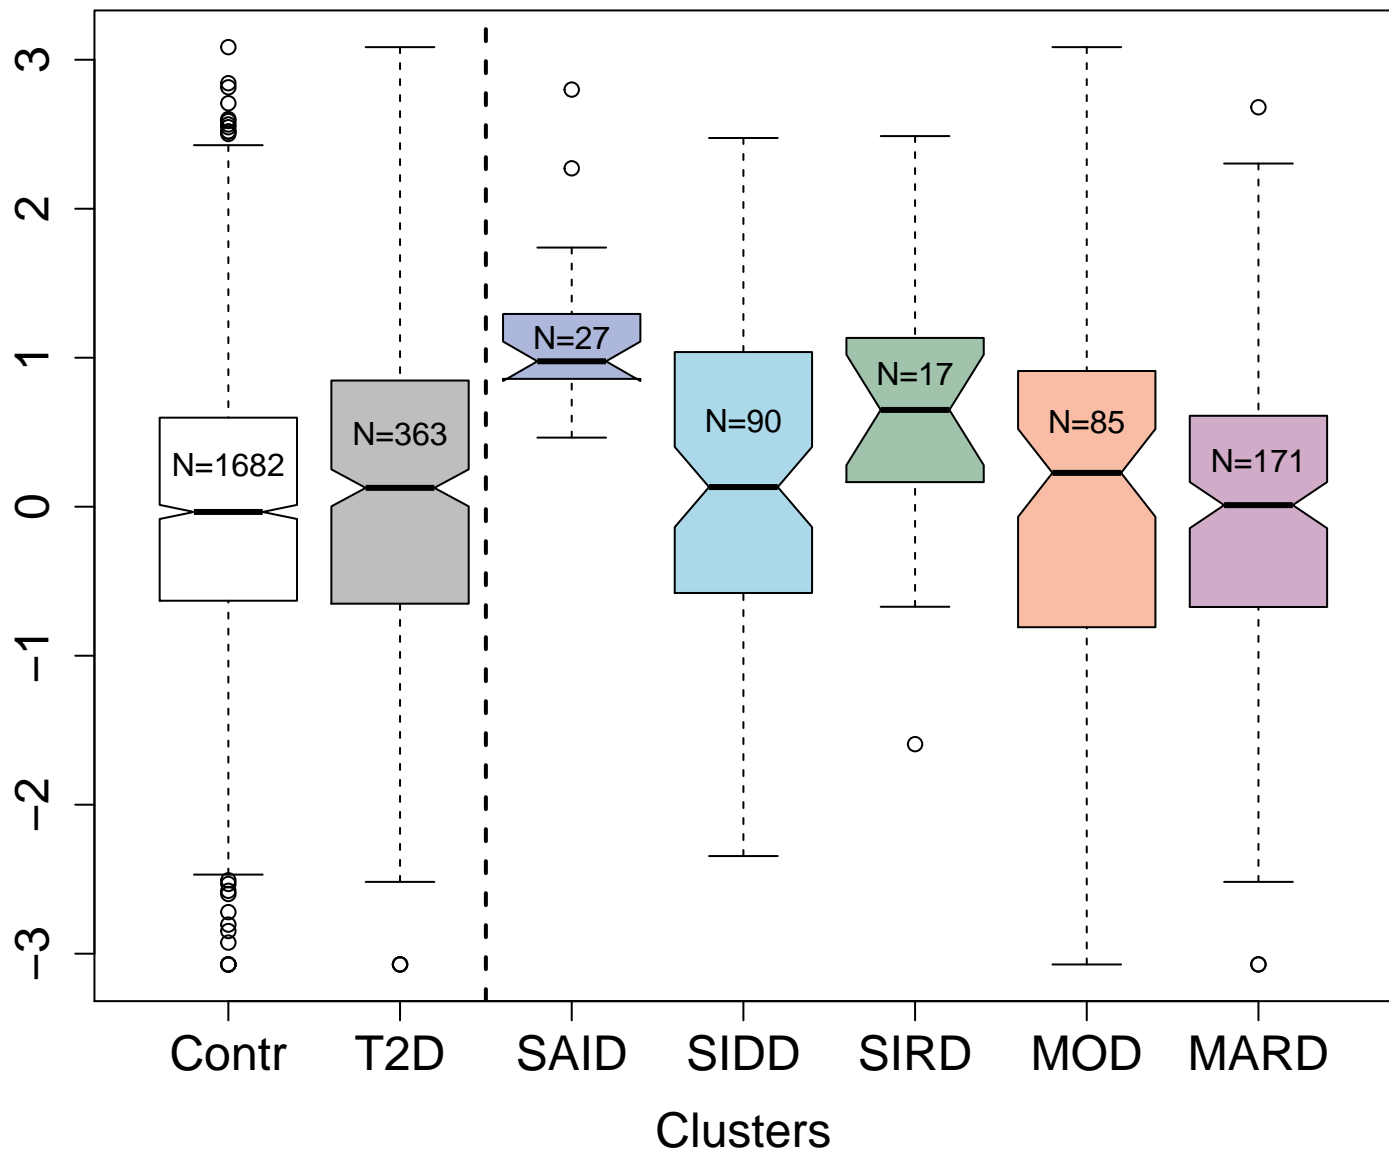



M46691 : X - 17146

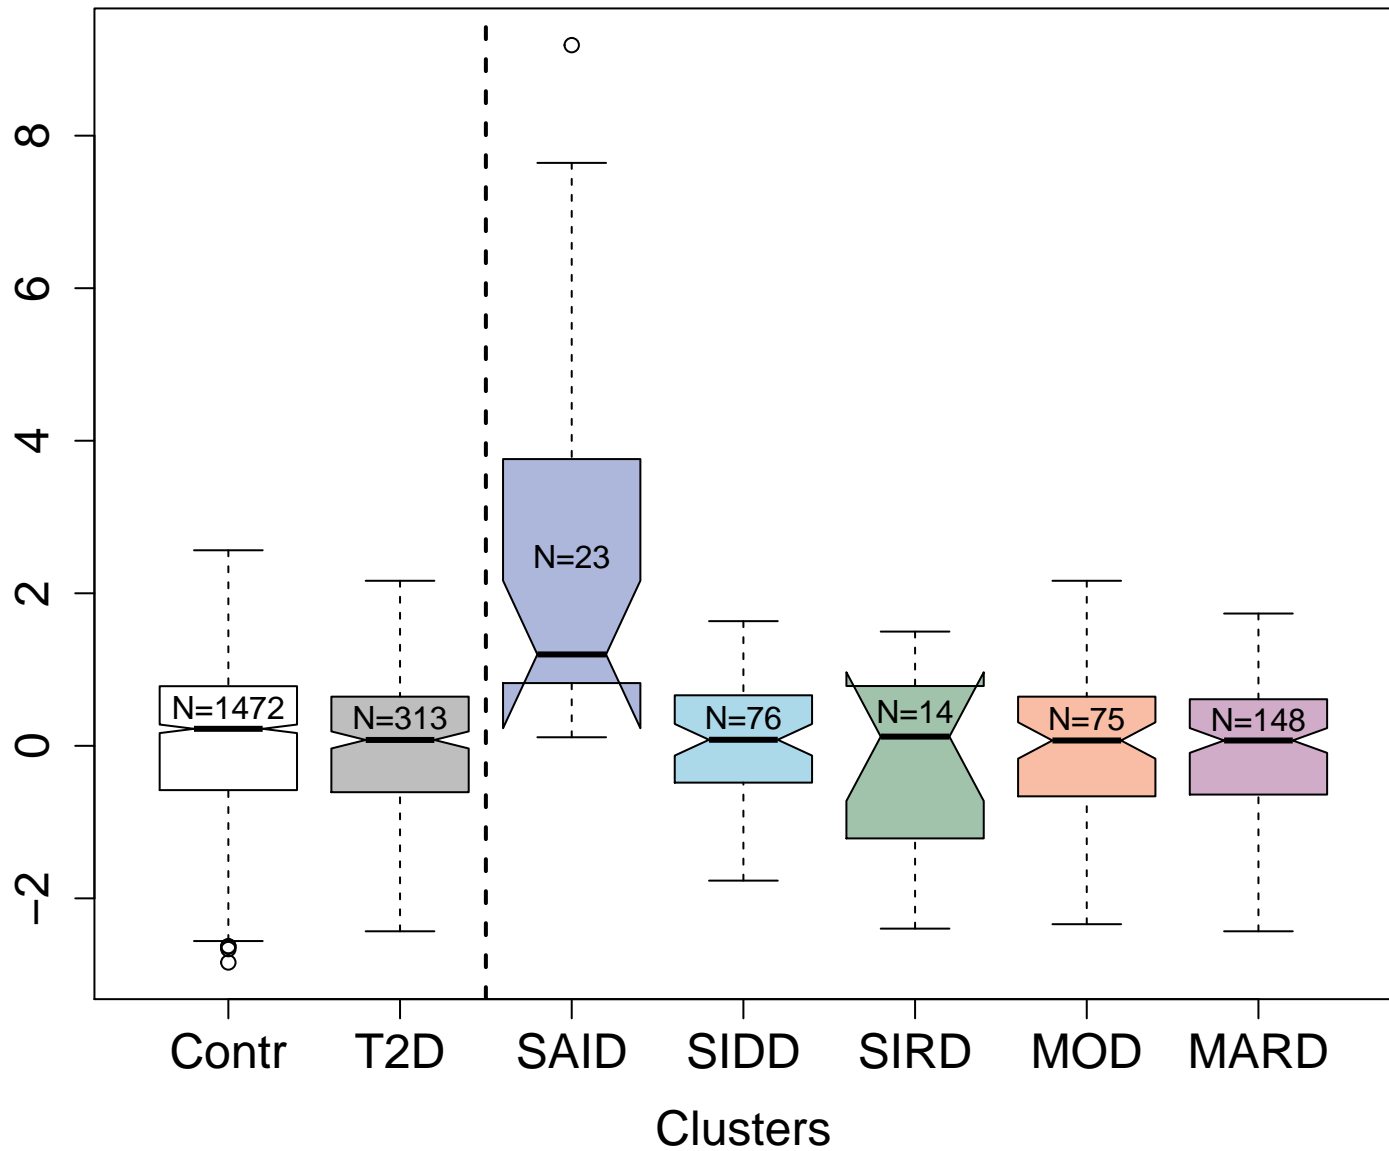

M46613: X - 12216

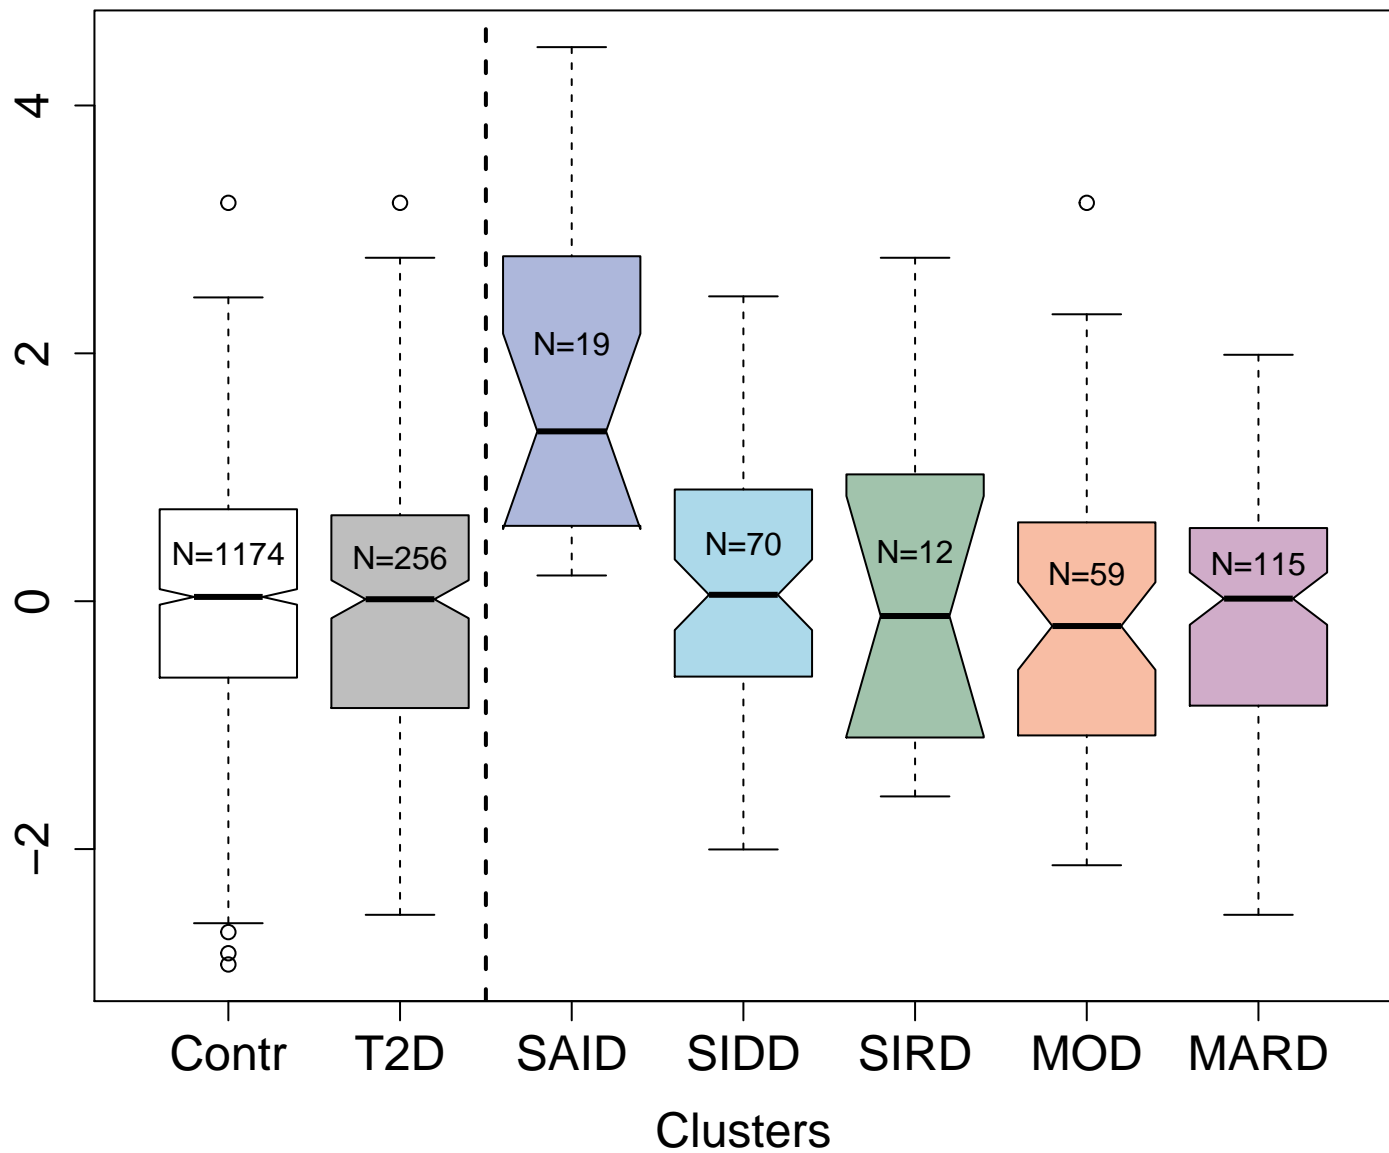

M63153 : metabolonic lactone sulfate

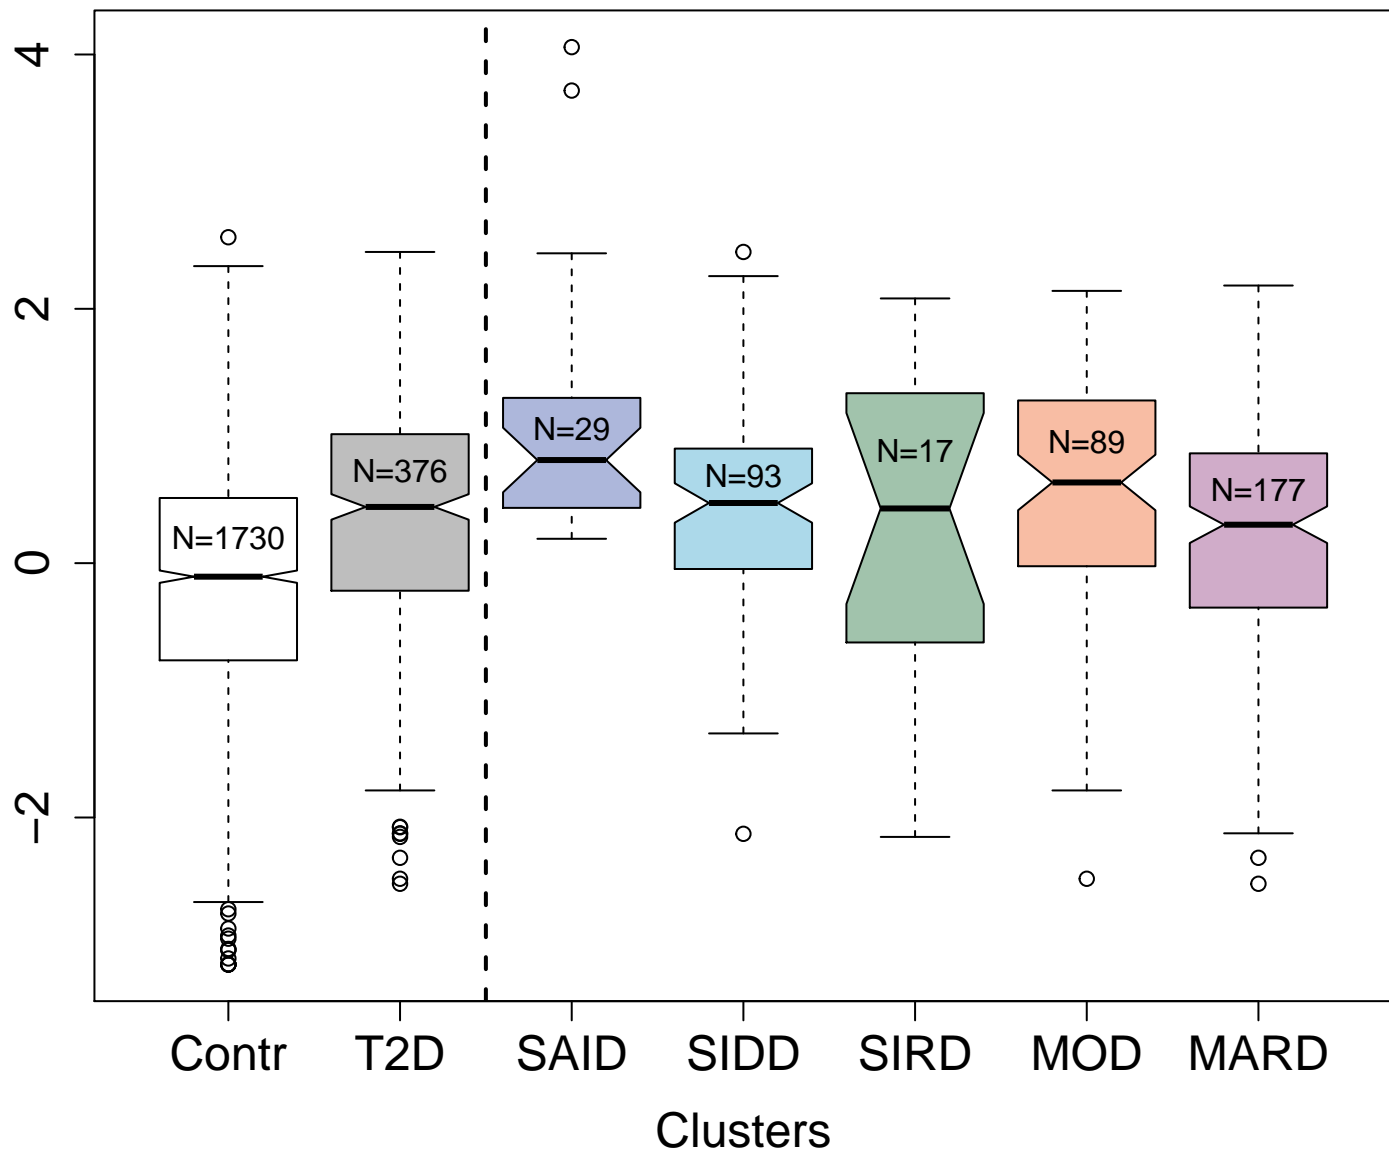

M45966 : 1-stearoyl-GPS (18:0)\*

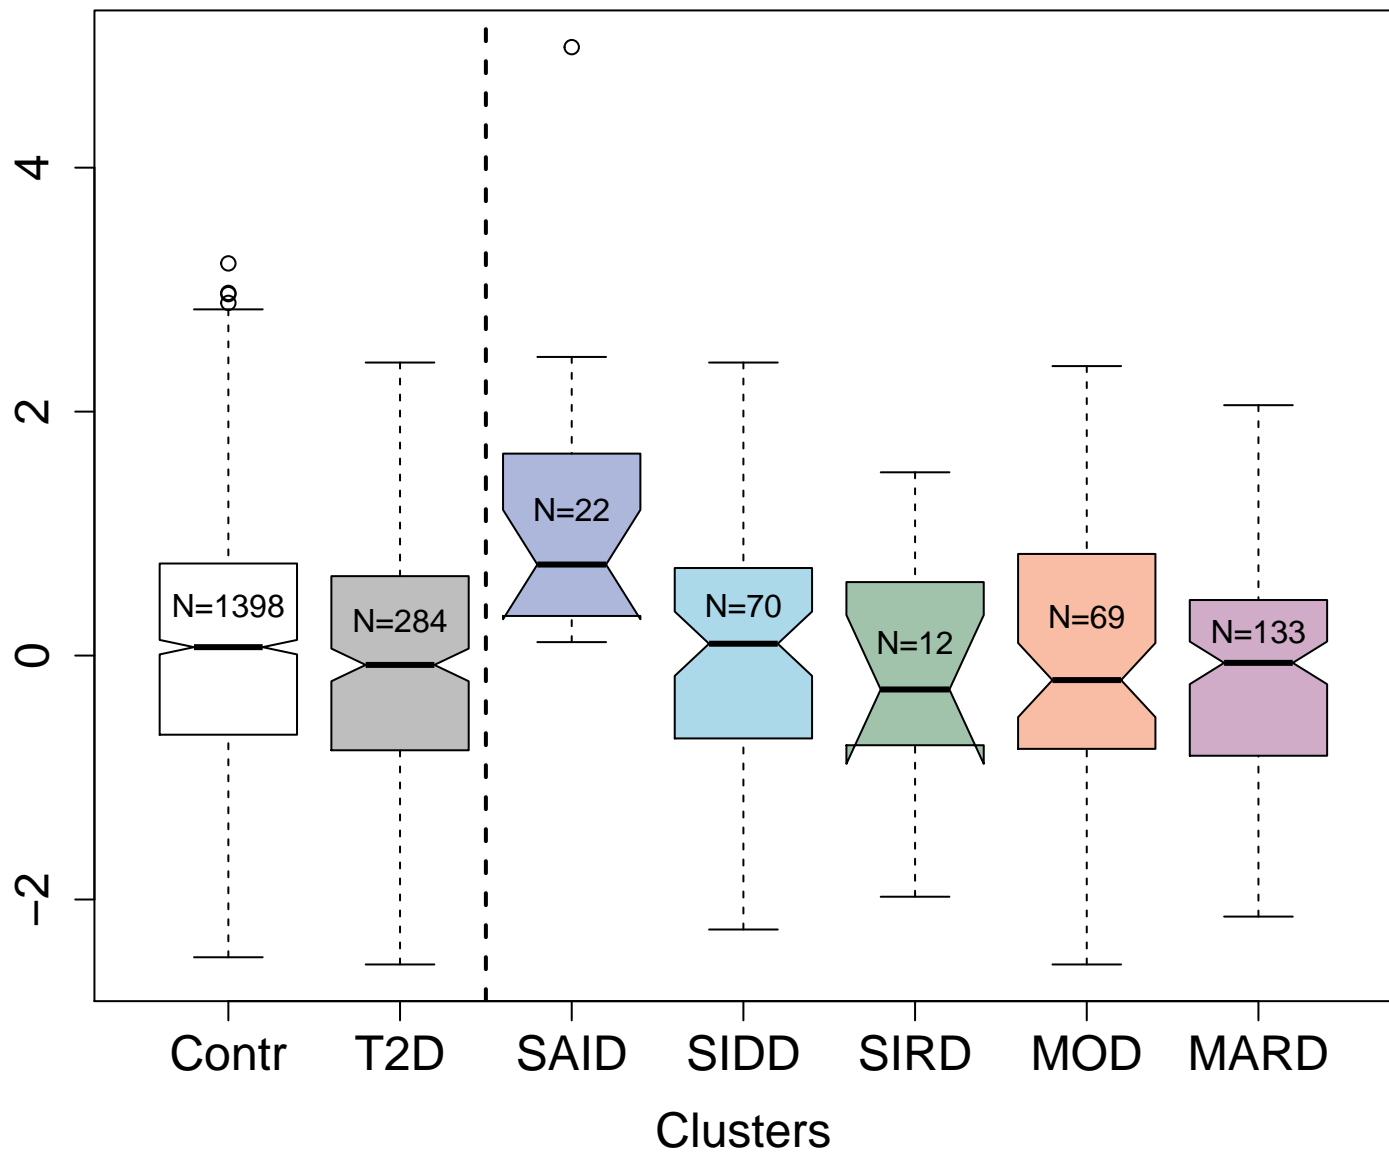

M32197 : 3-(4-hydroxyphenyl)lactate

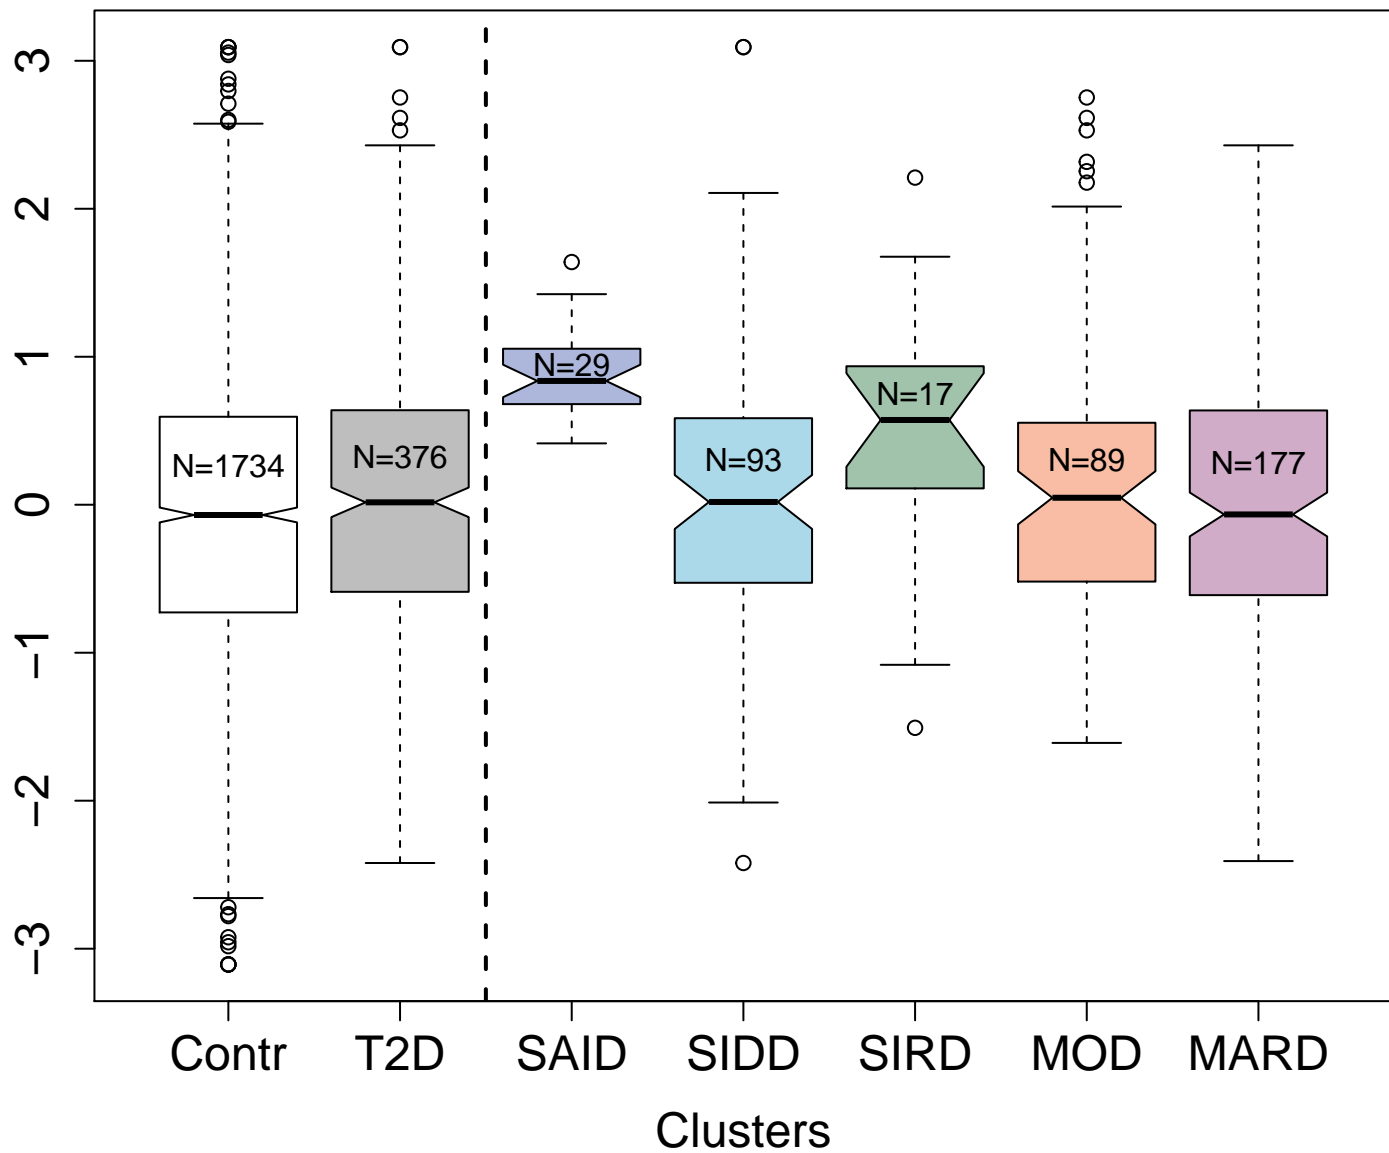

M47135 : 11-ketochocholanolone glucuronide

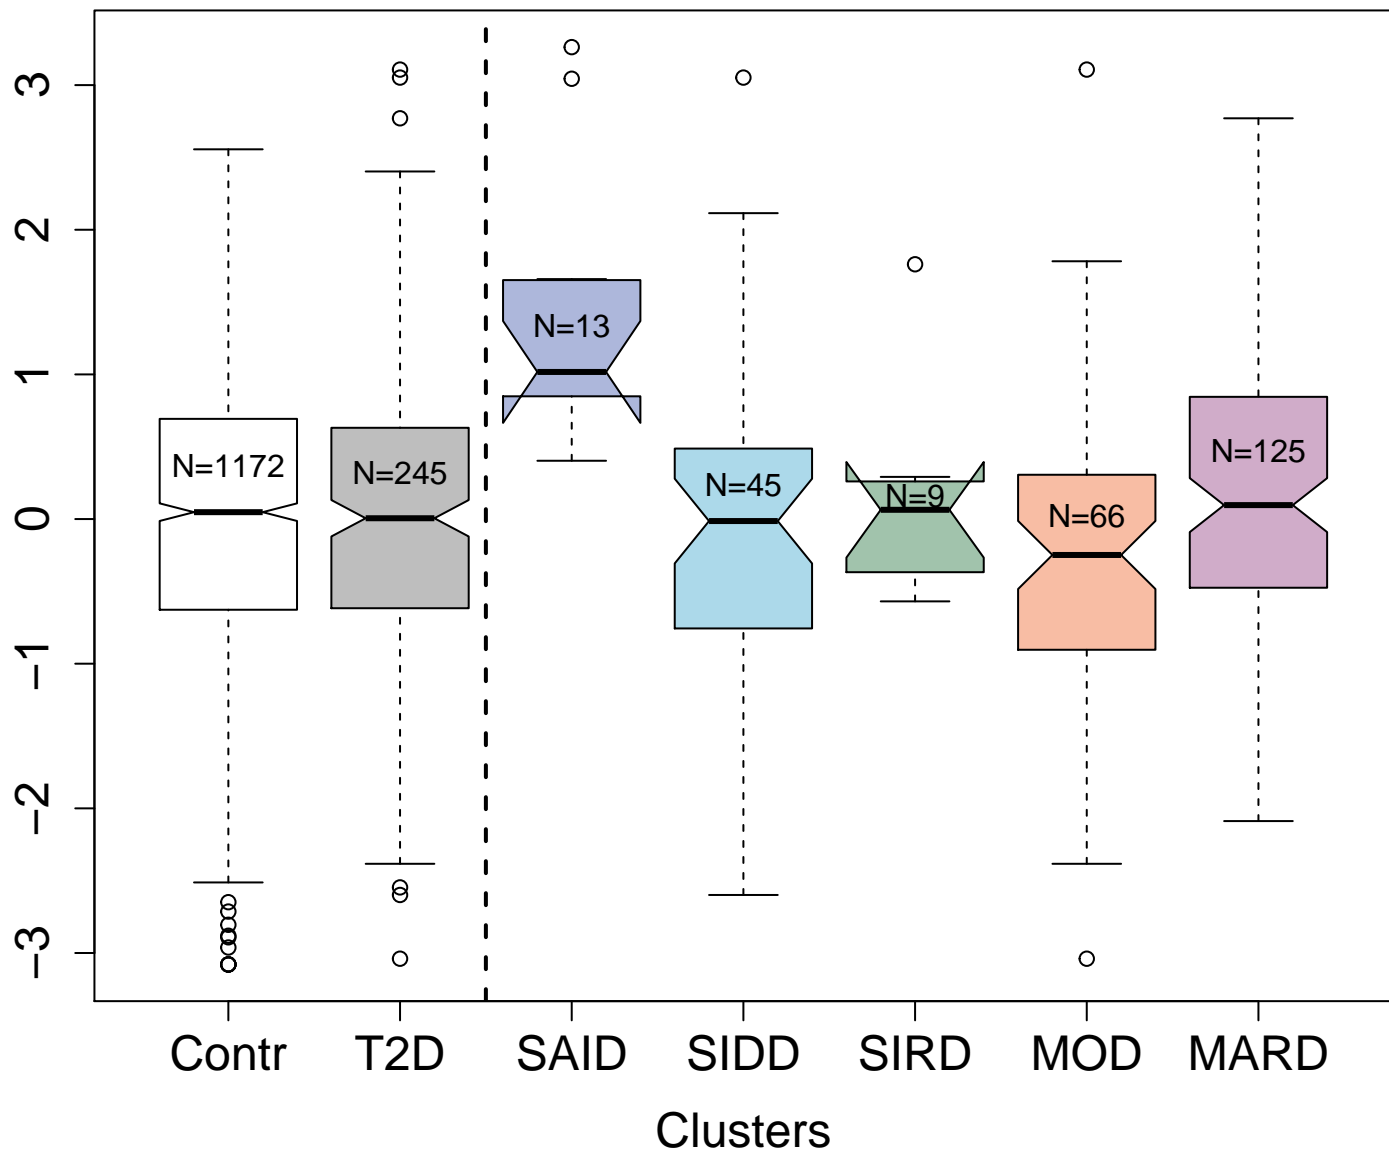

M15443 : glucuronate

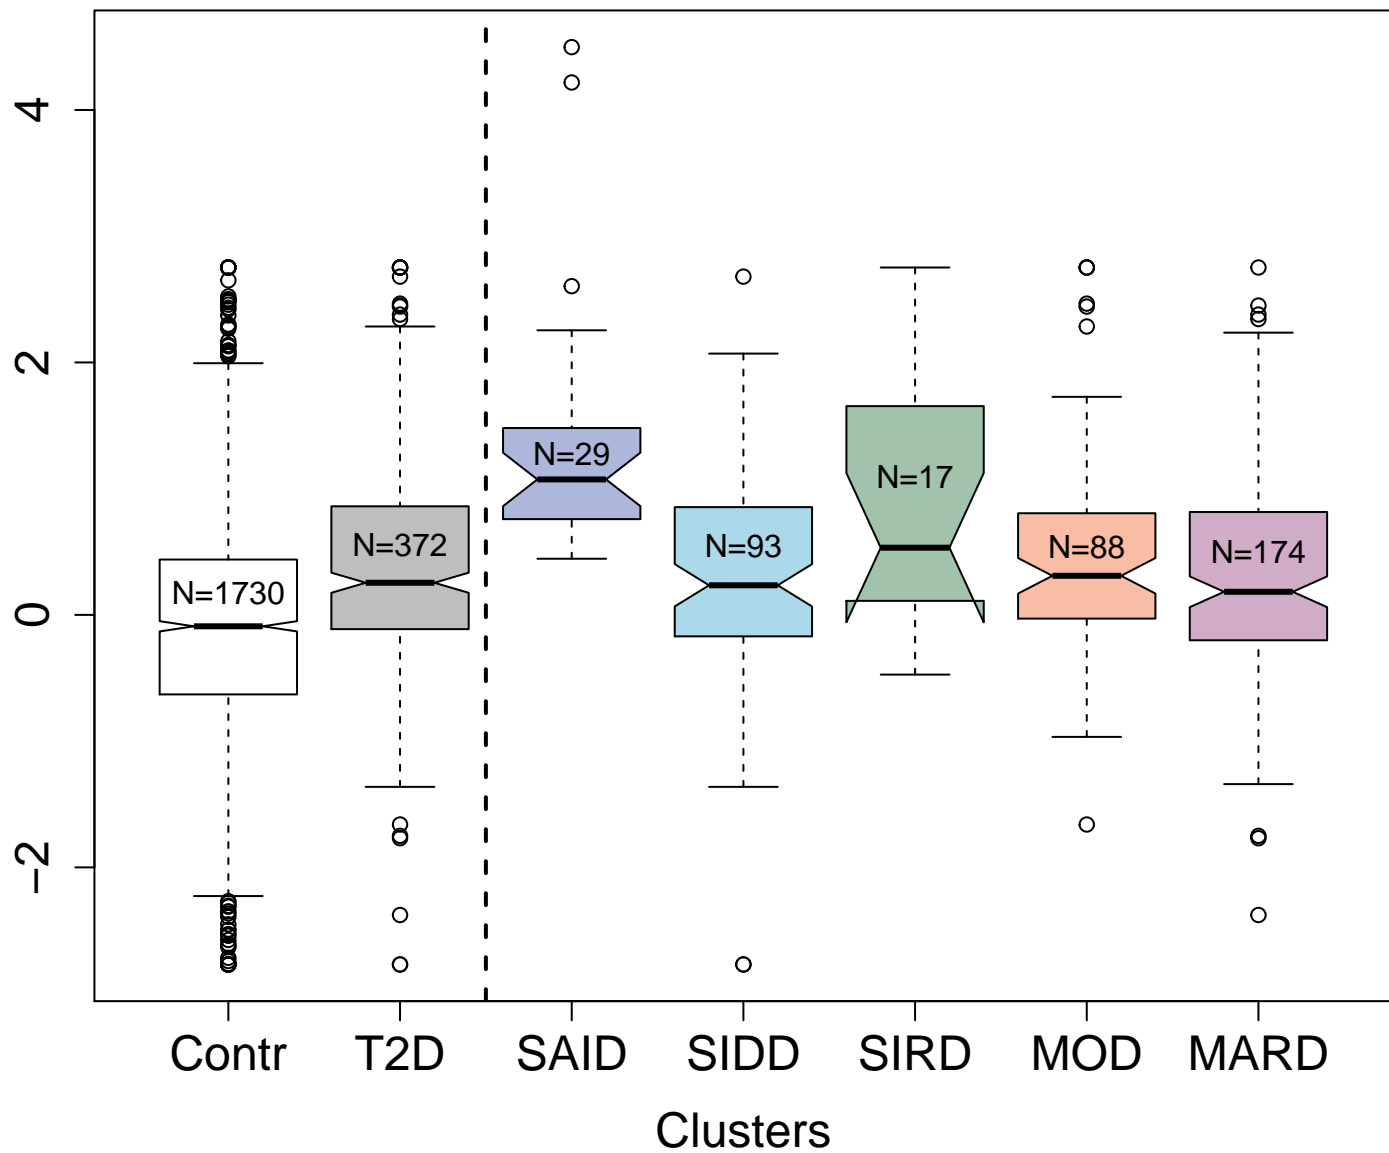

M31591 : androsterone sulfate

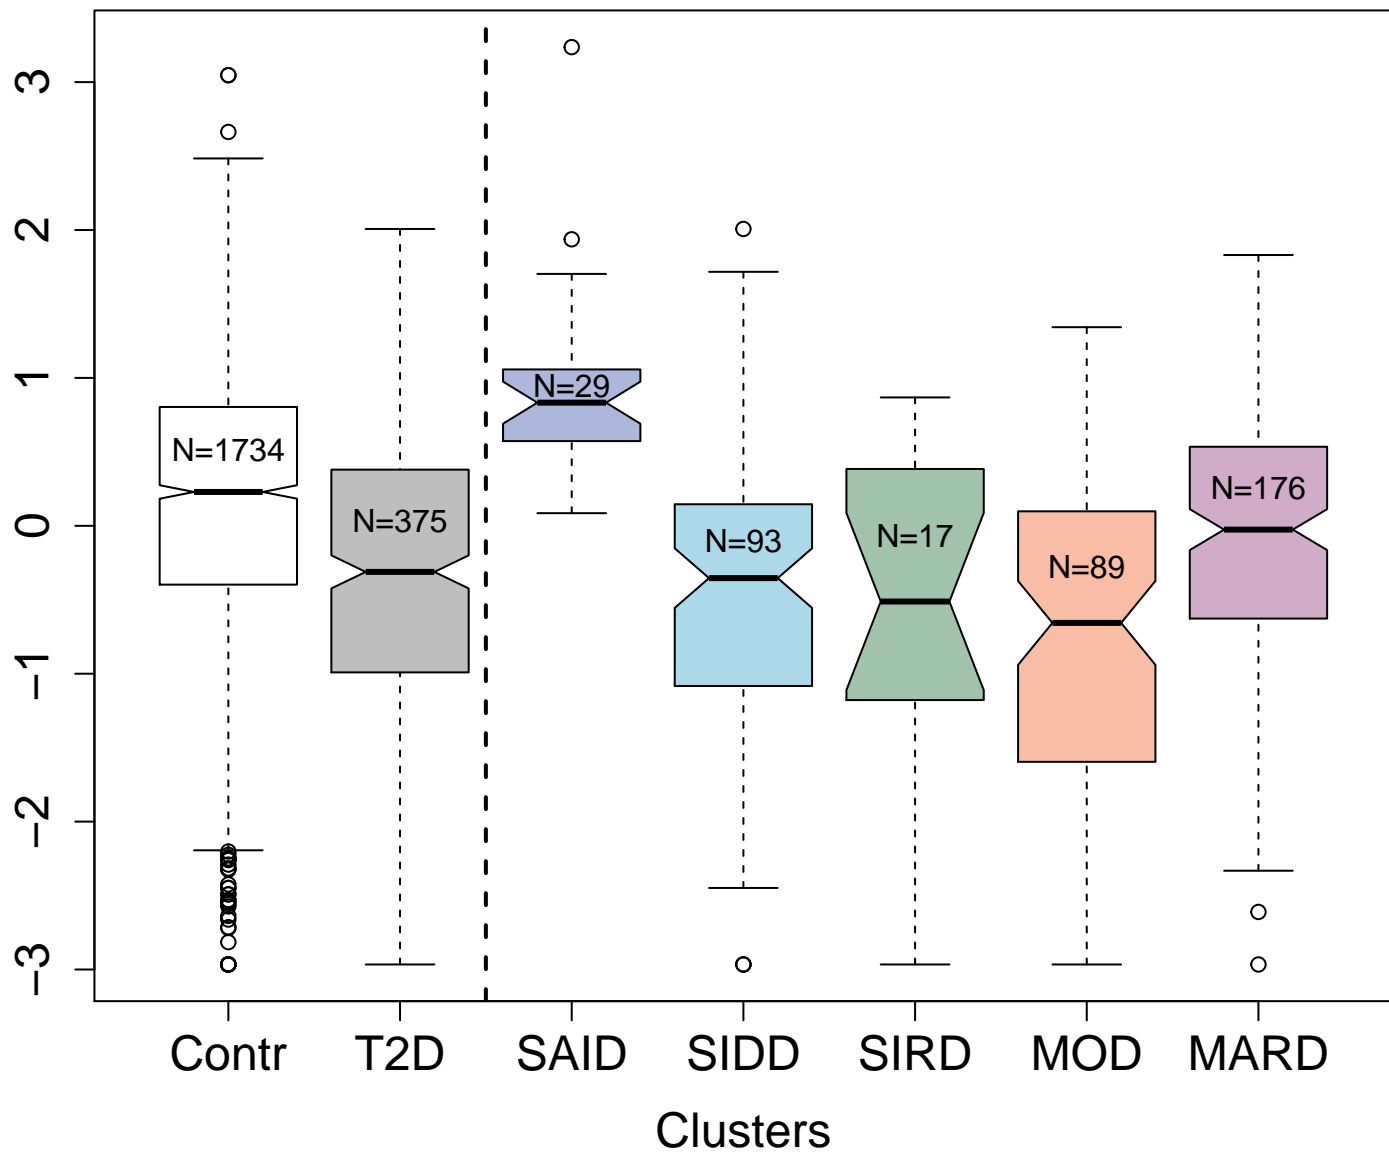



M46142 : mannitol/sorbitol

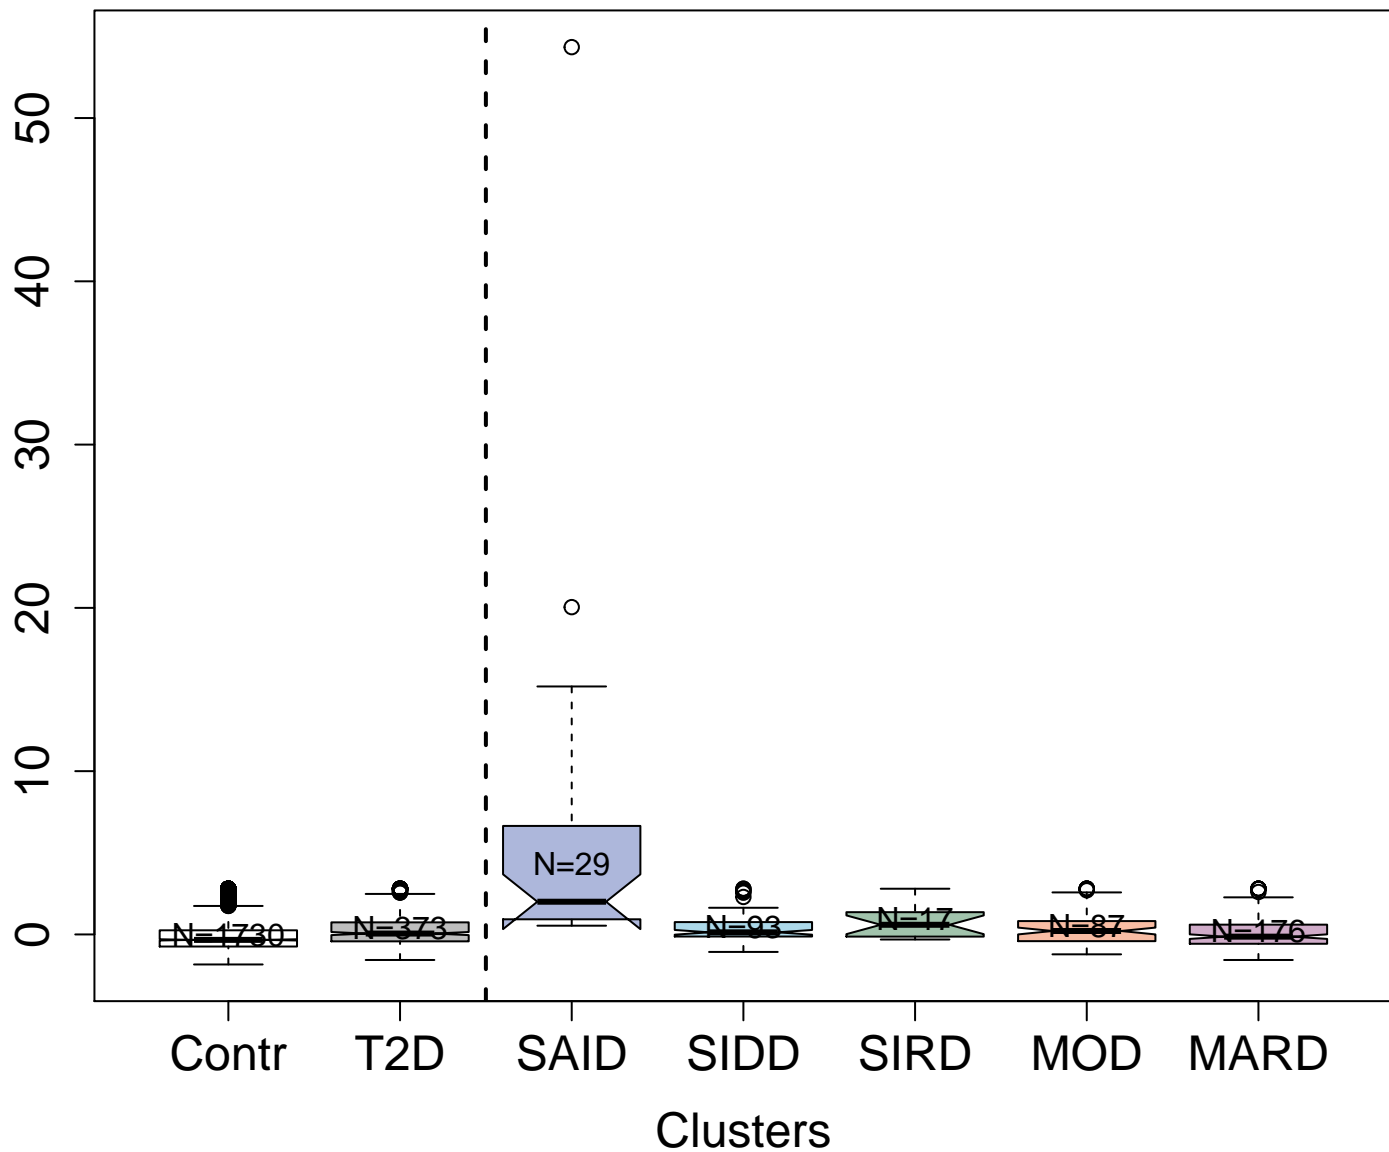

M43266 : 2-aminophenol sulfate

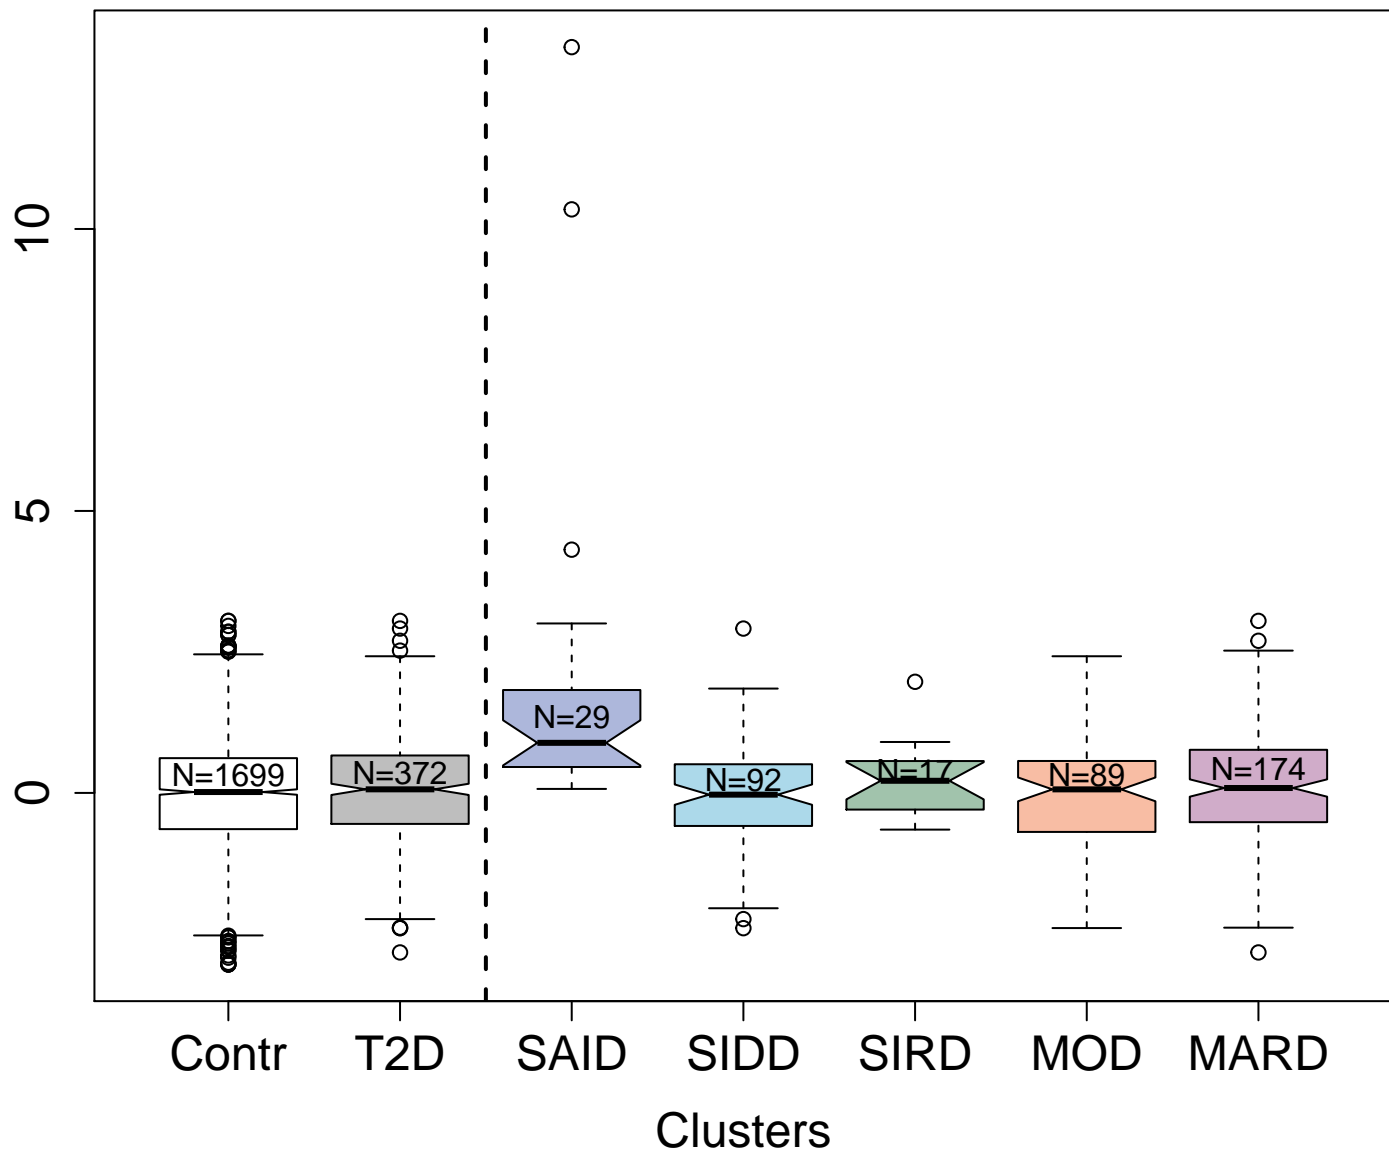

M52435 : sphingomyelin (d18:2/23:0, d18:1/23:1, d17:1/24:1)

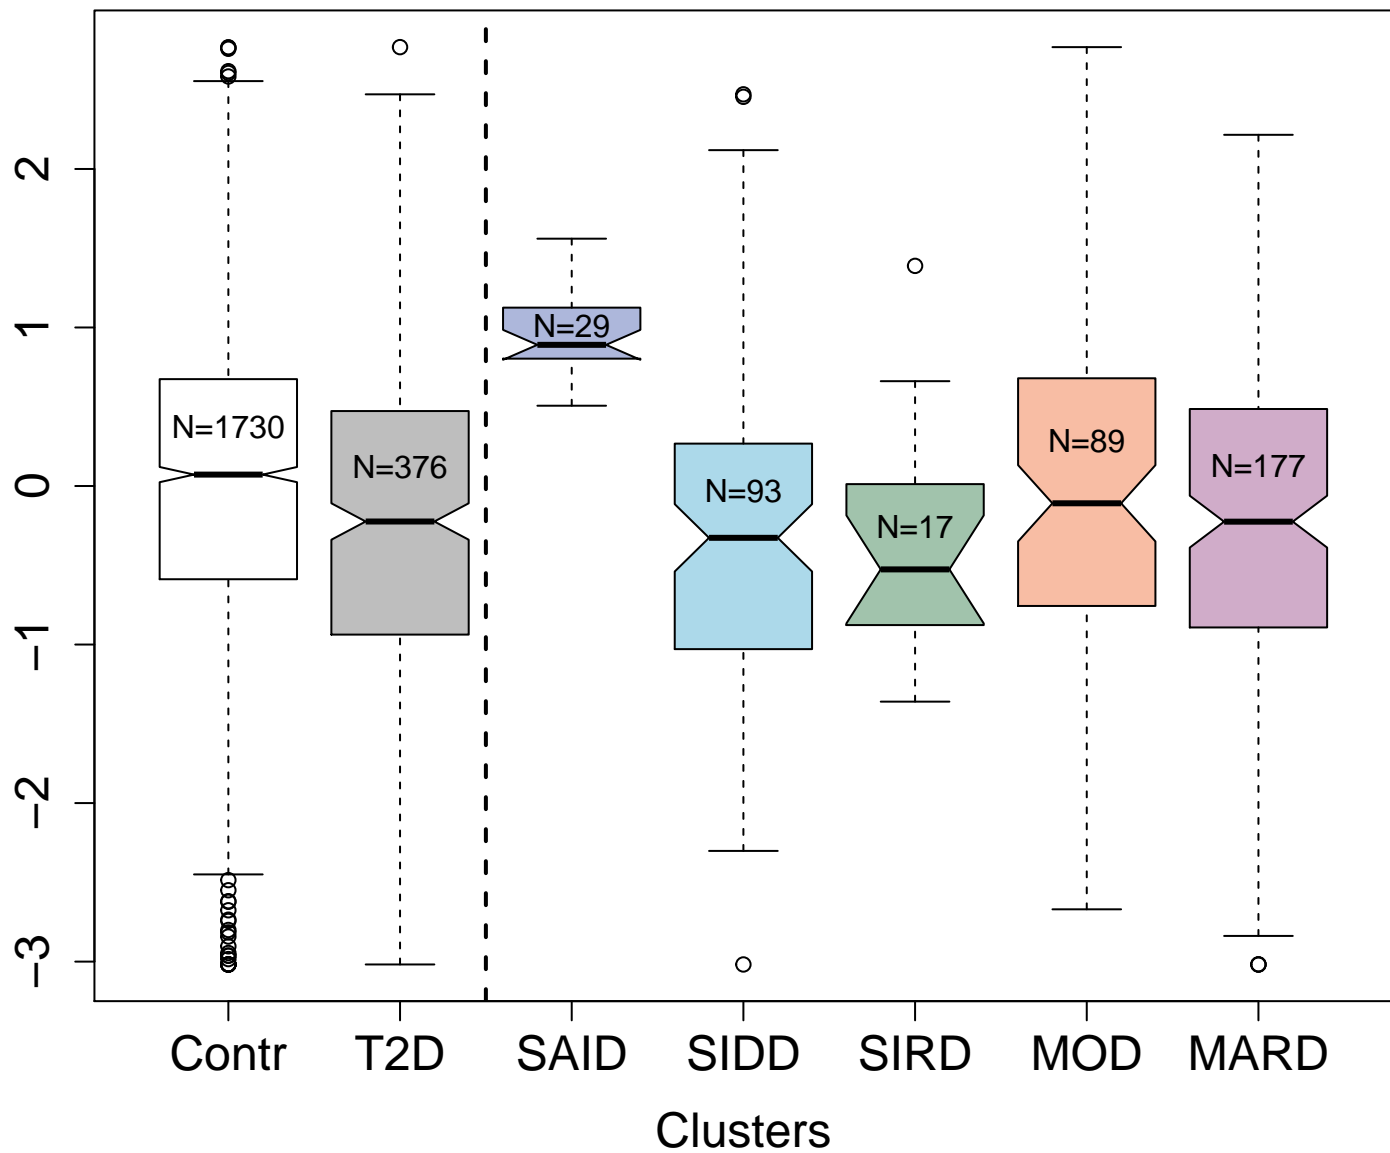

M38306 : metformin

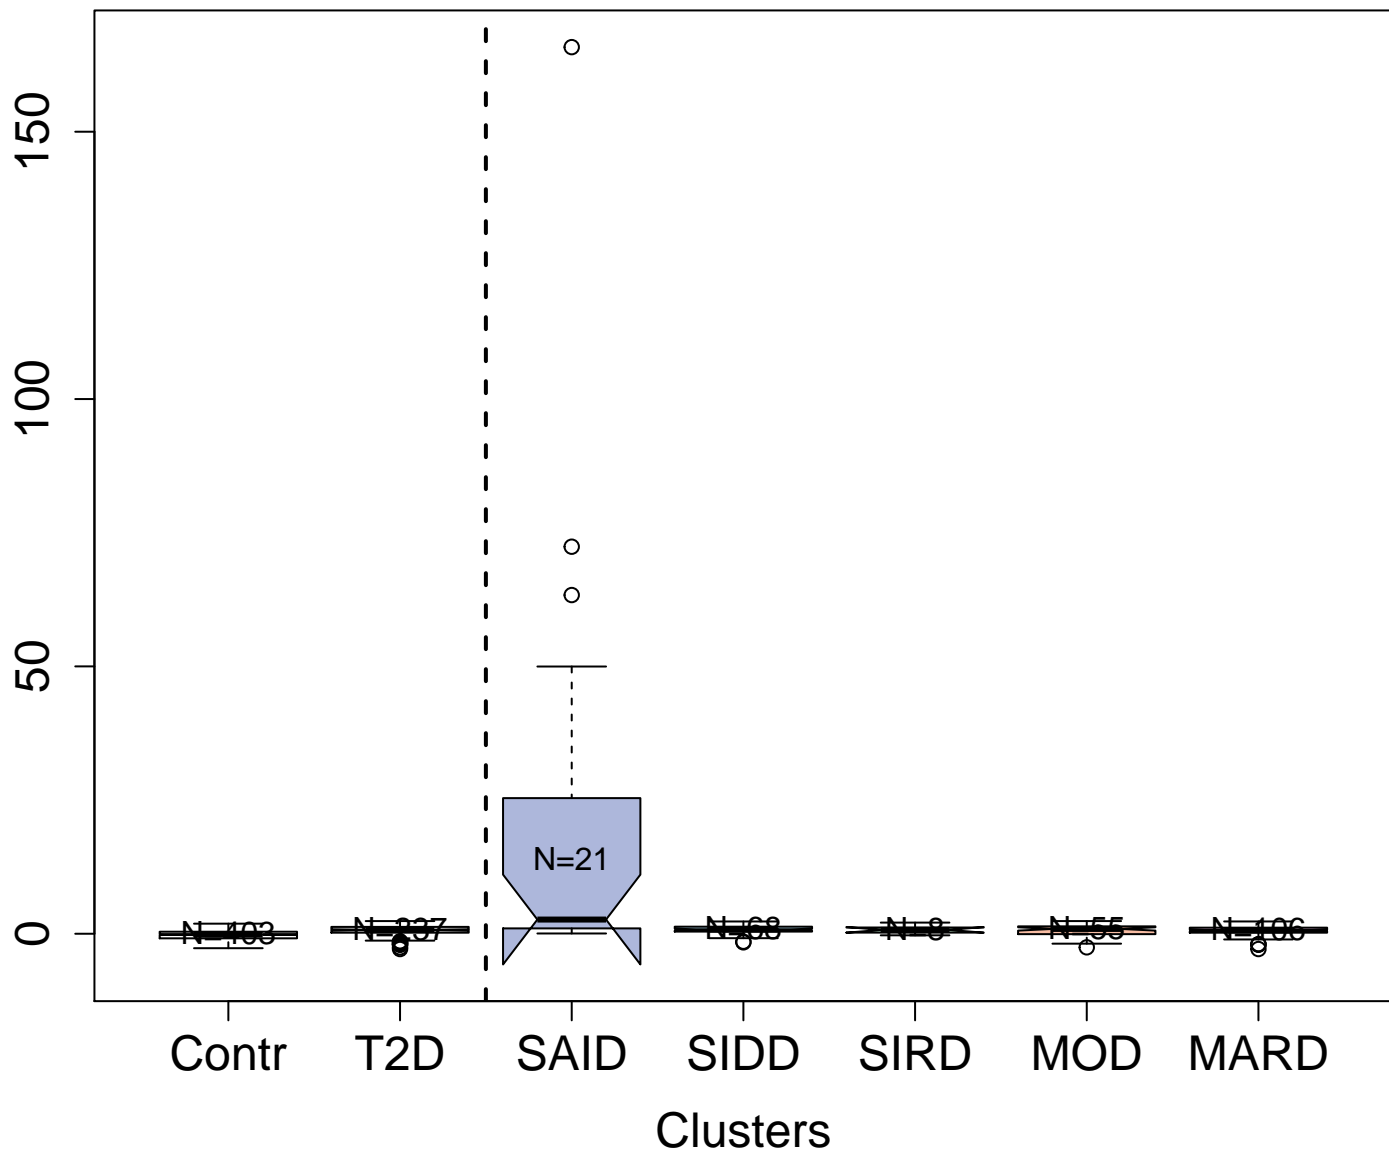

M27719 : galactonate

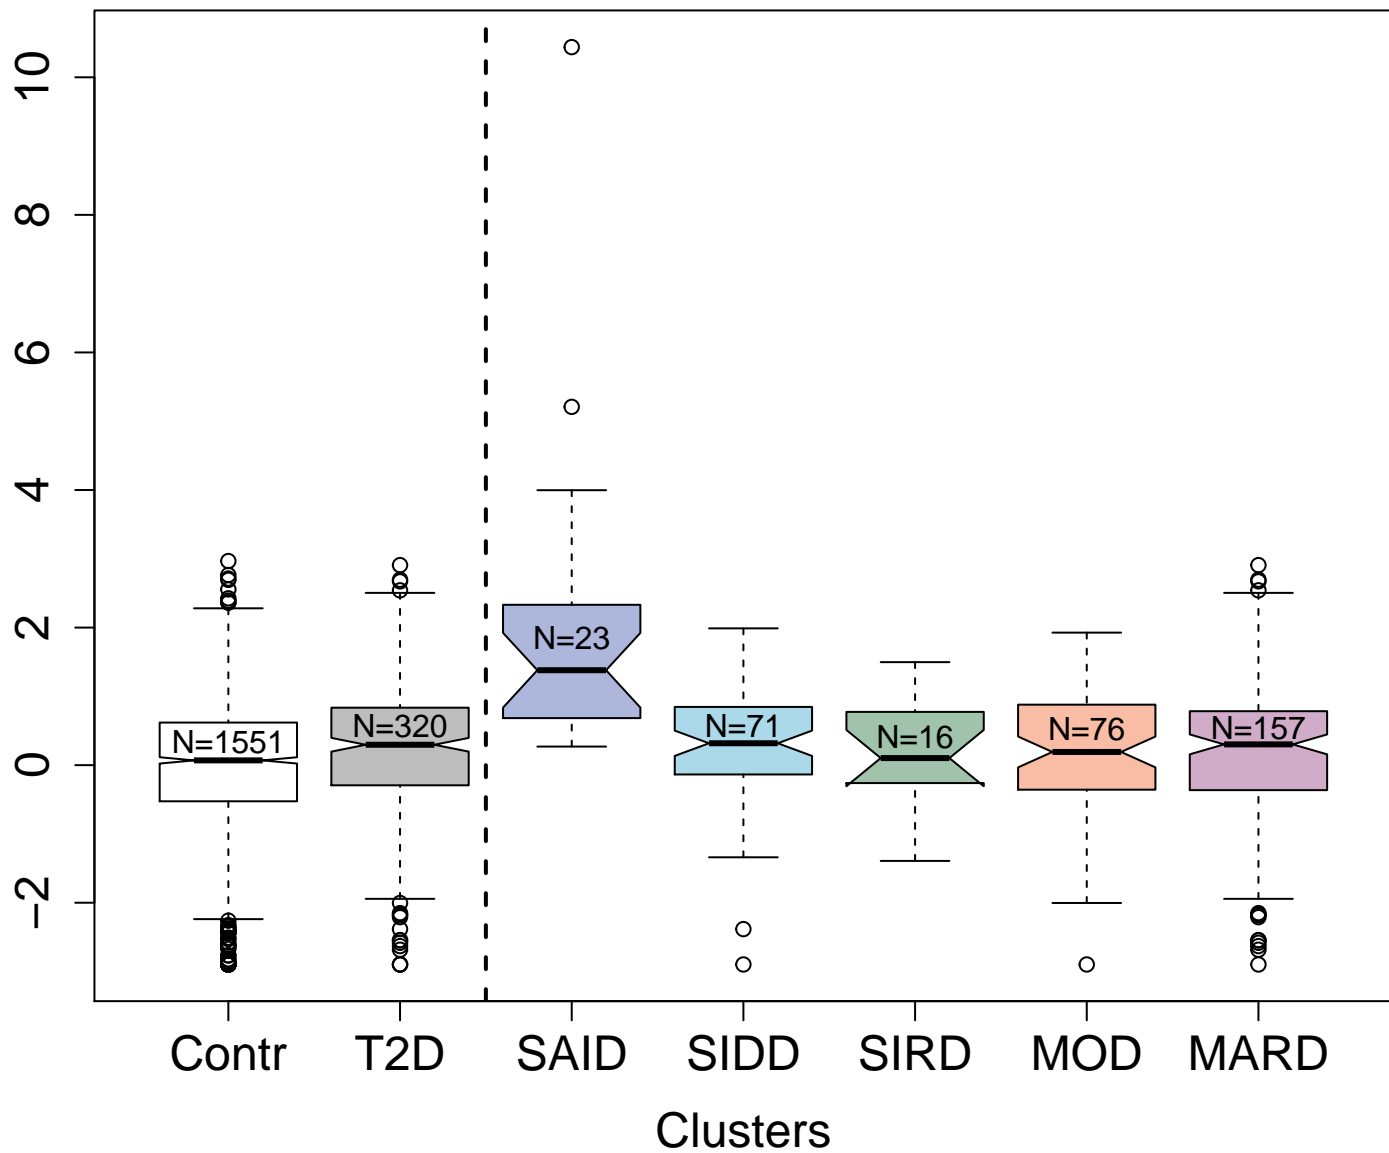

M37211 : androstenediol (3beta,17beta) monosulfate (1)

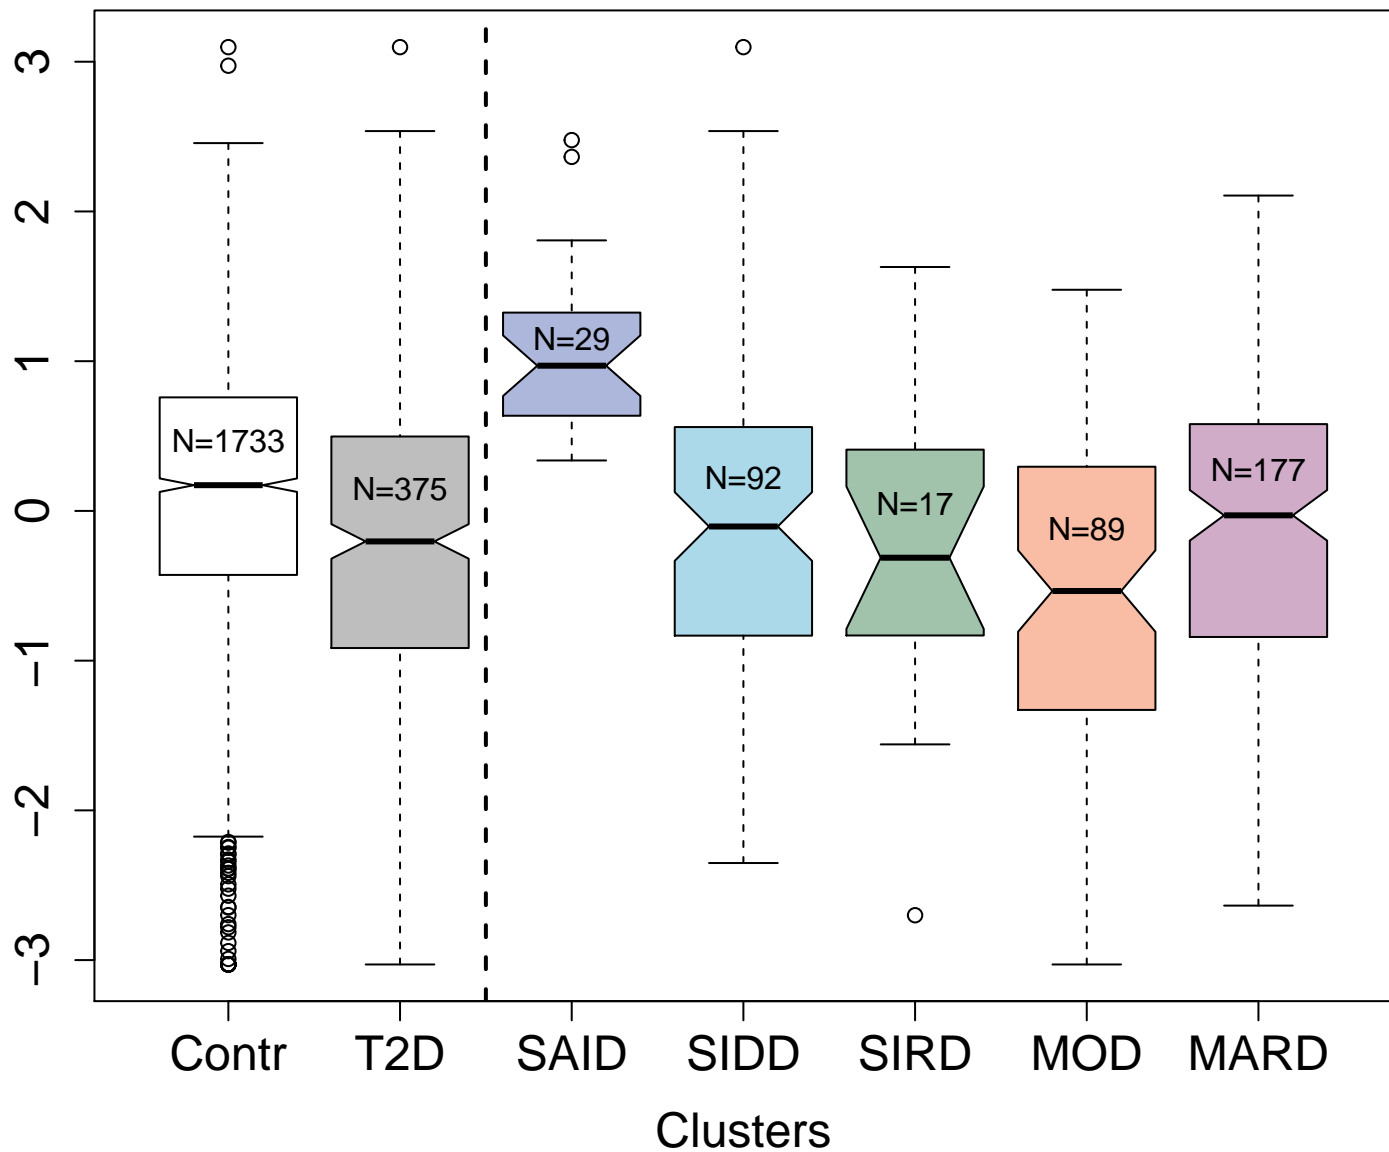

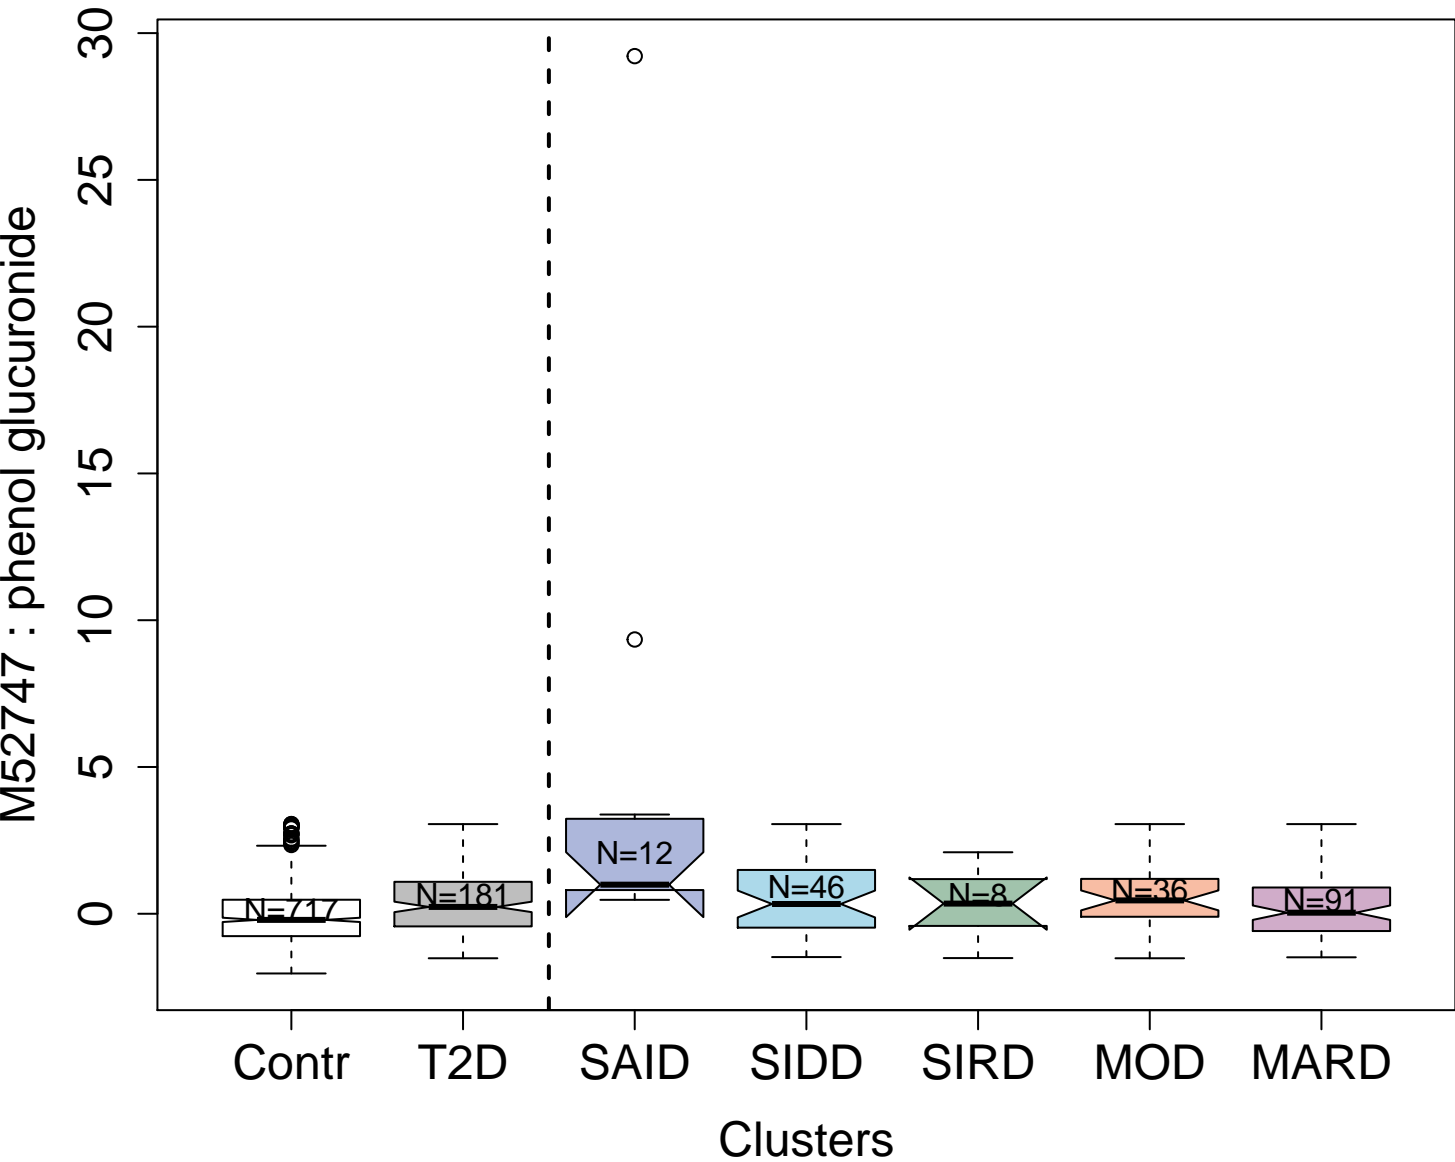

M18368 : cys-gly, oxidized

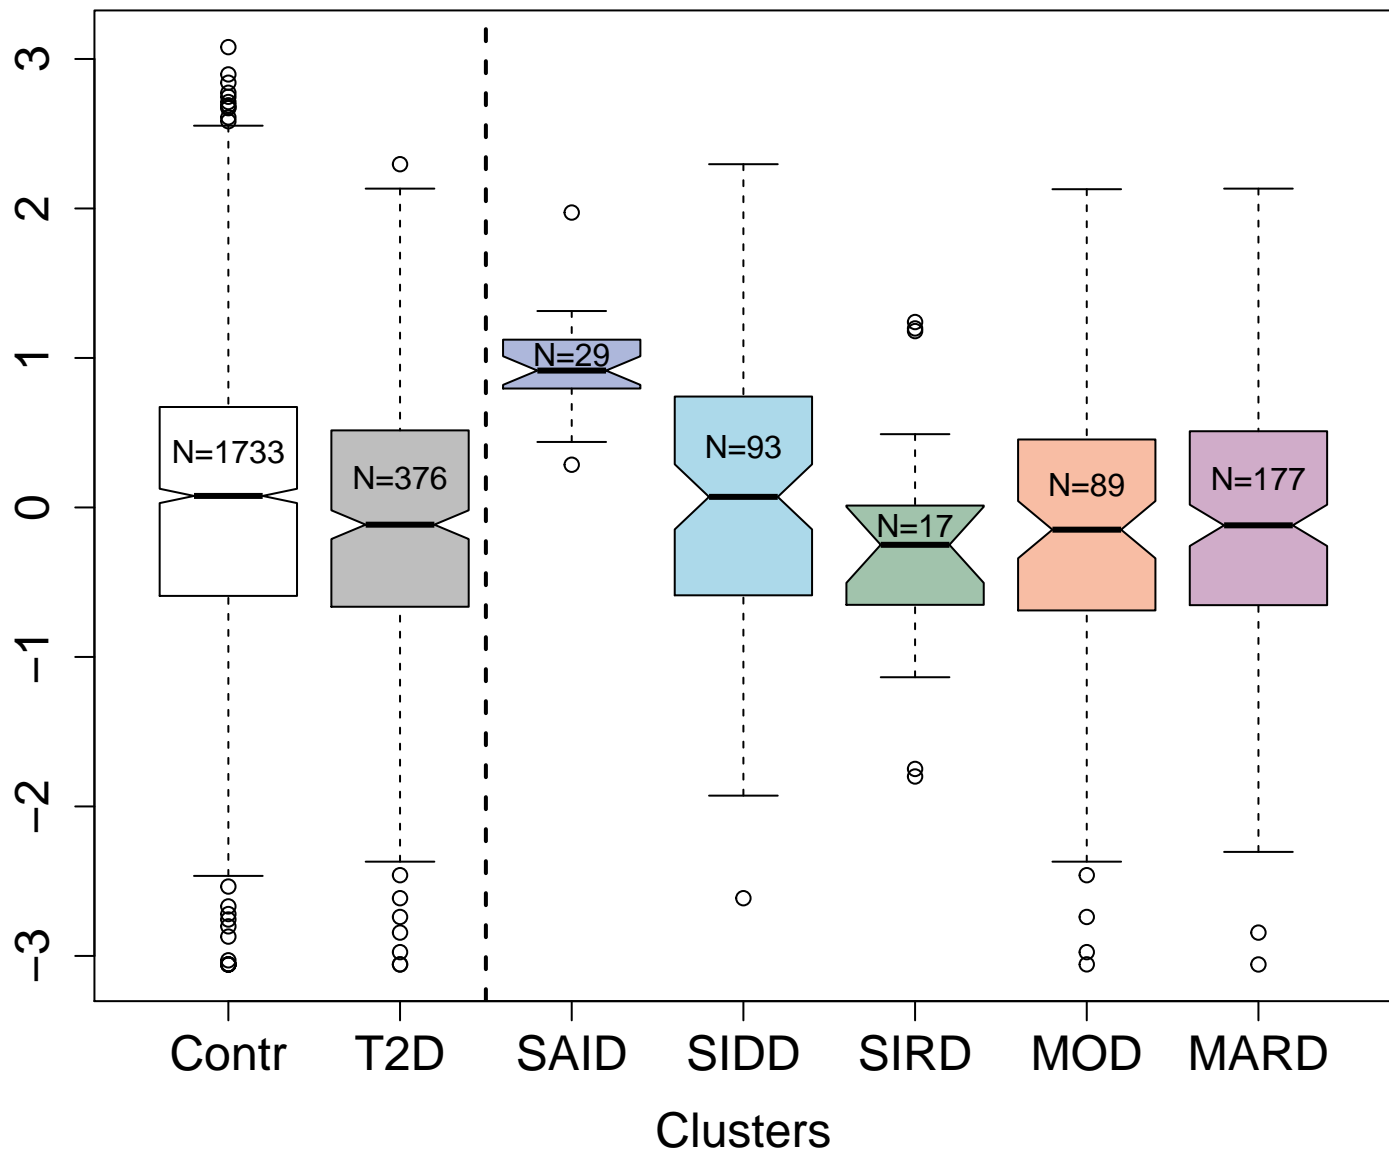



M47342 : X - 18345

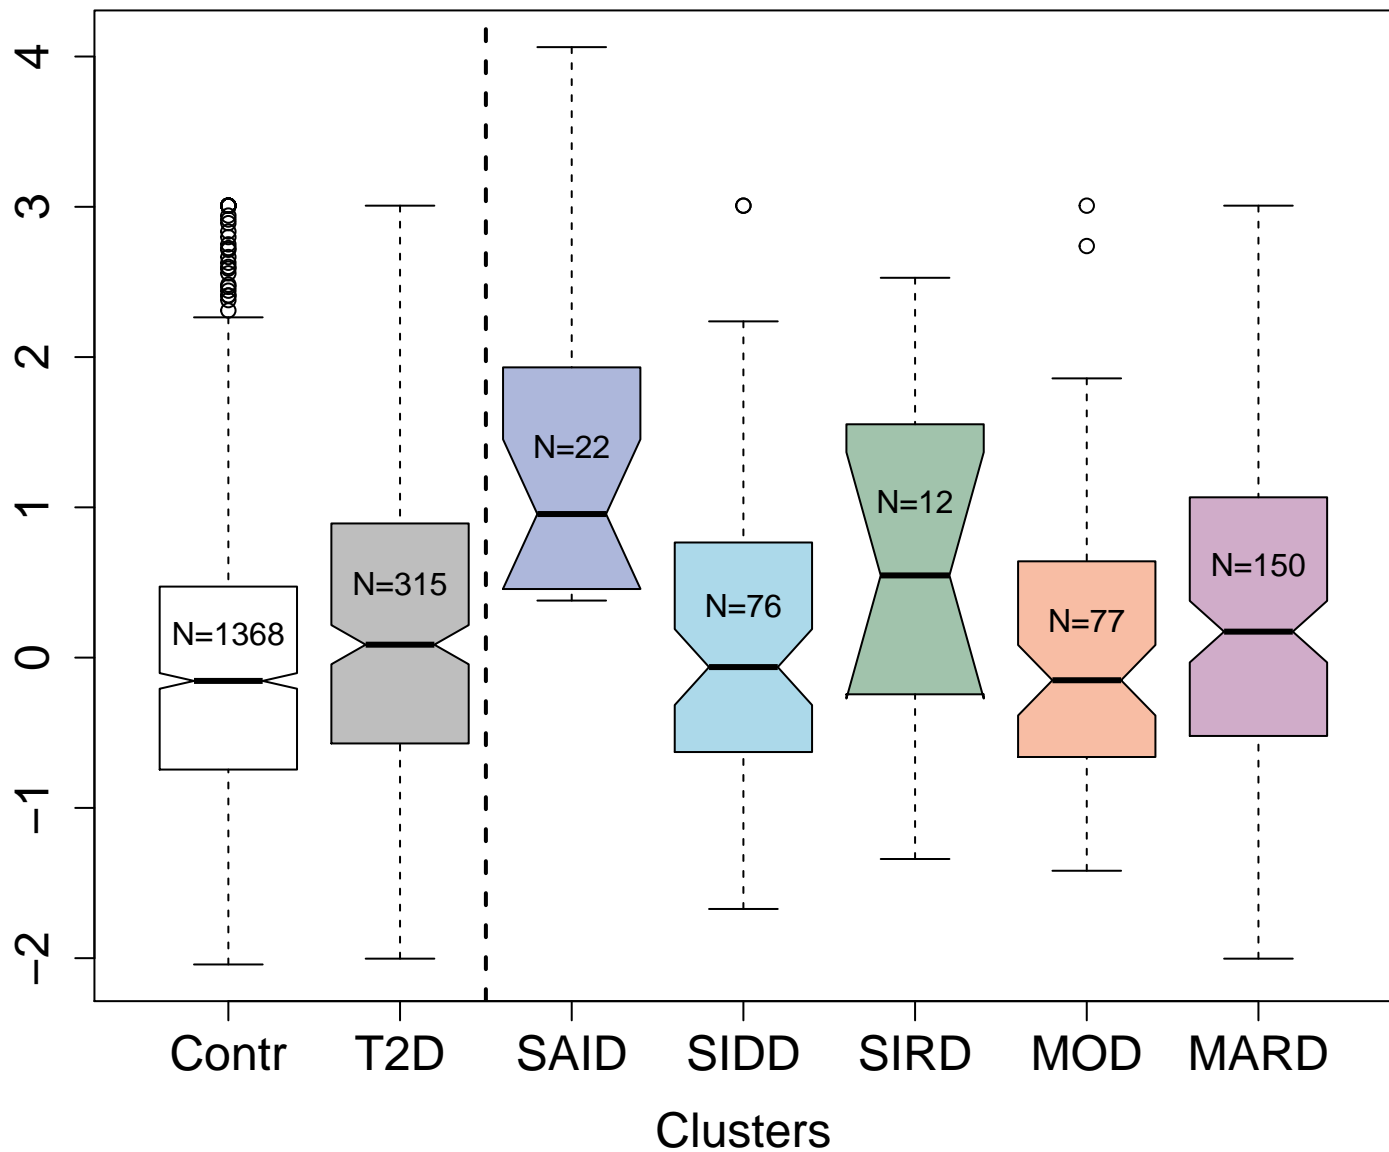

M47654 : X - 11858

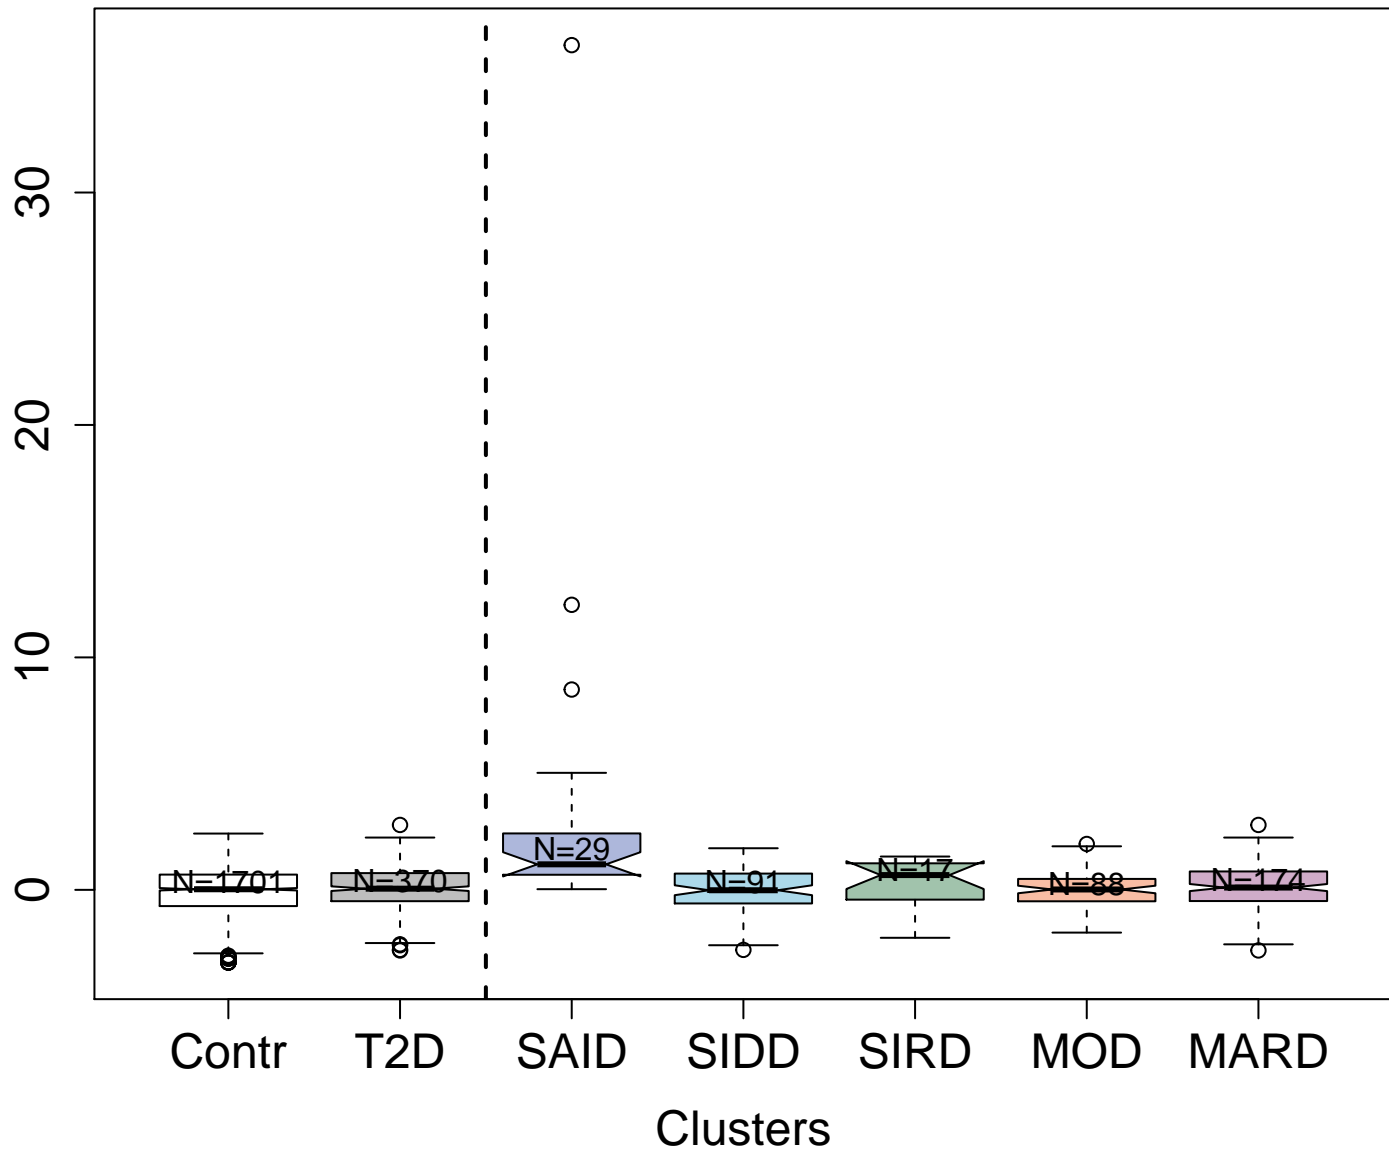

M57365 : myristoyl dihydrospingomyelin (d18:0/14:0)\*

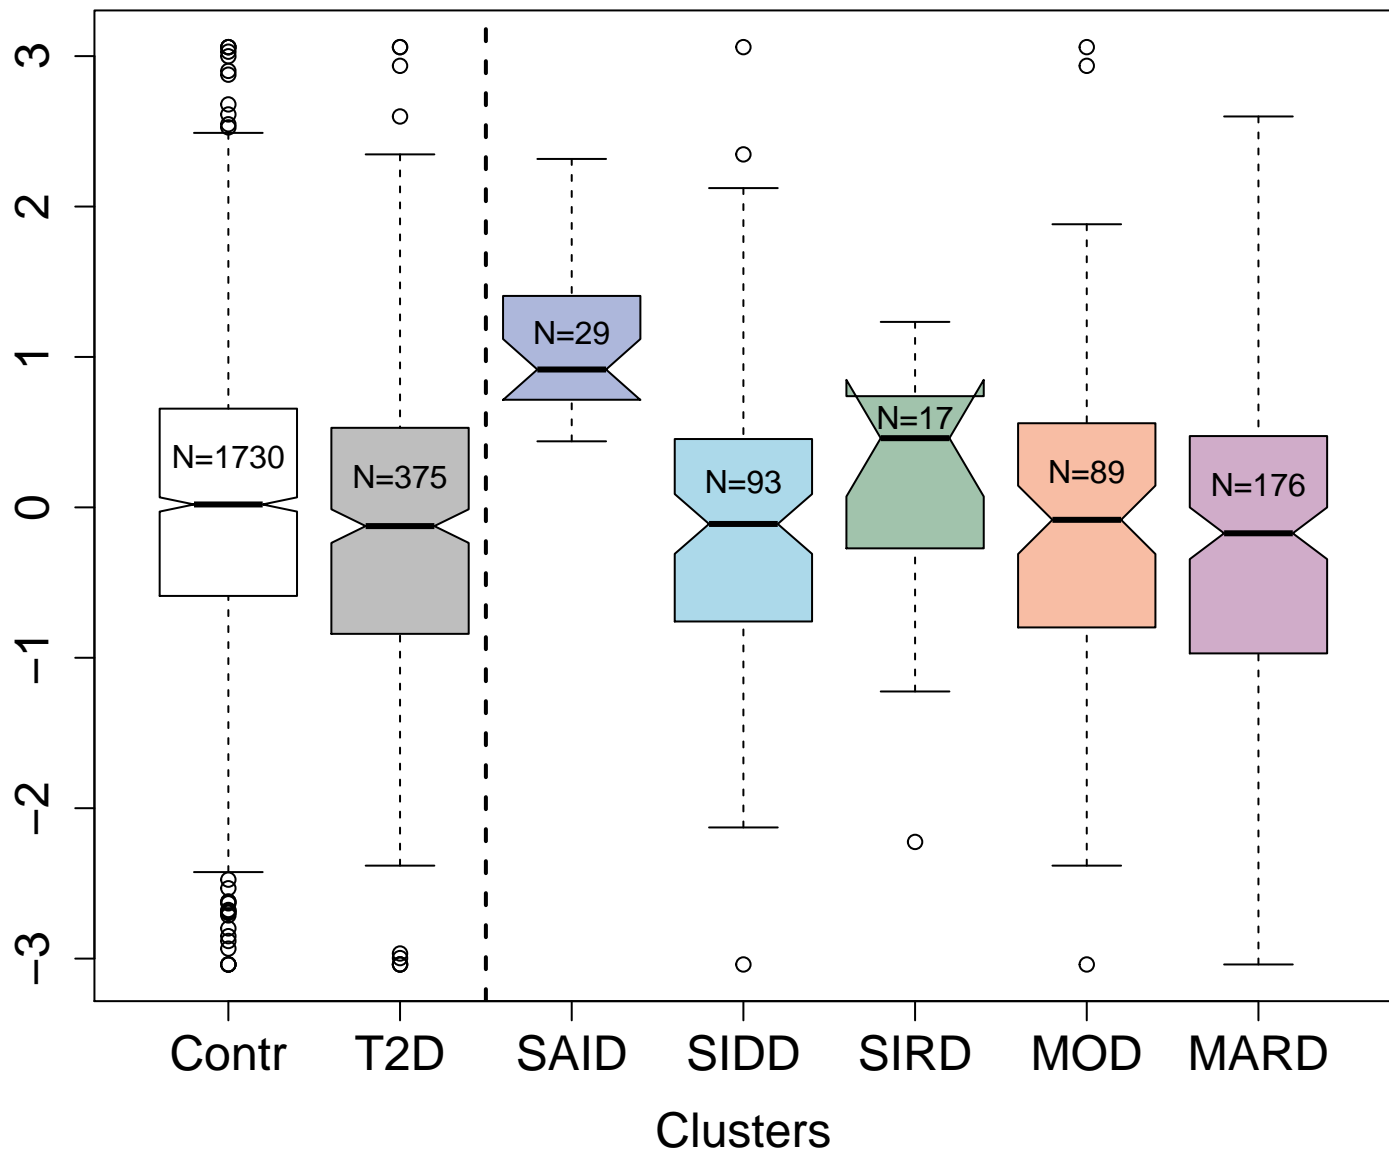

M1419 : 5-methylthioadenosine (MTA)

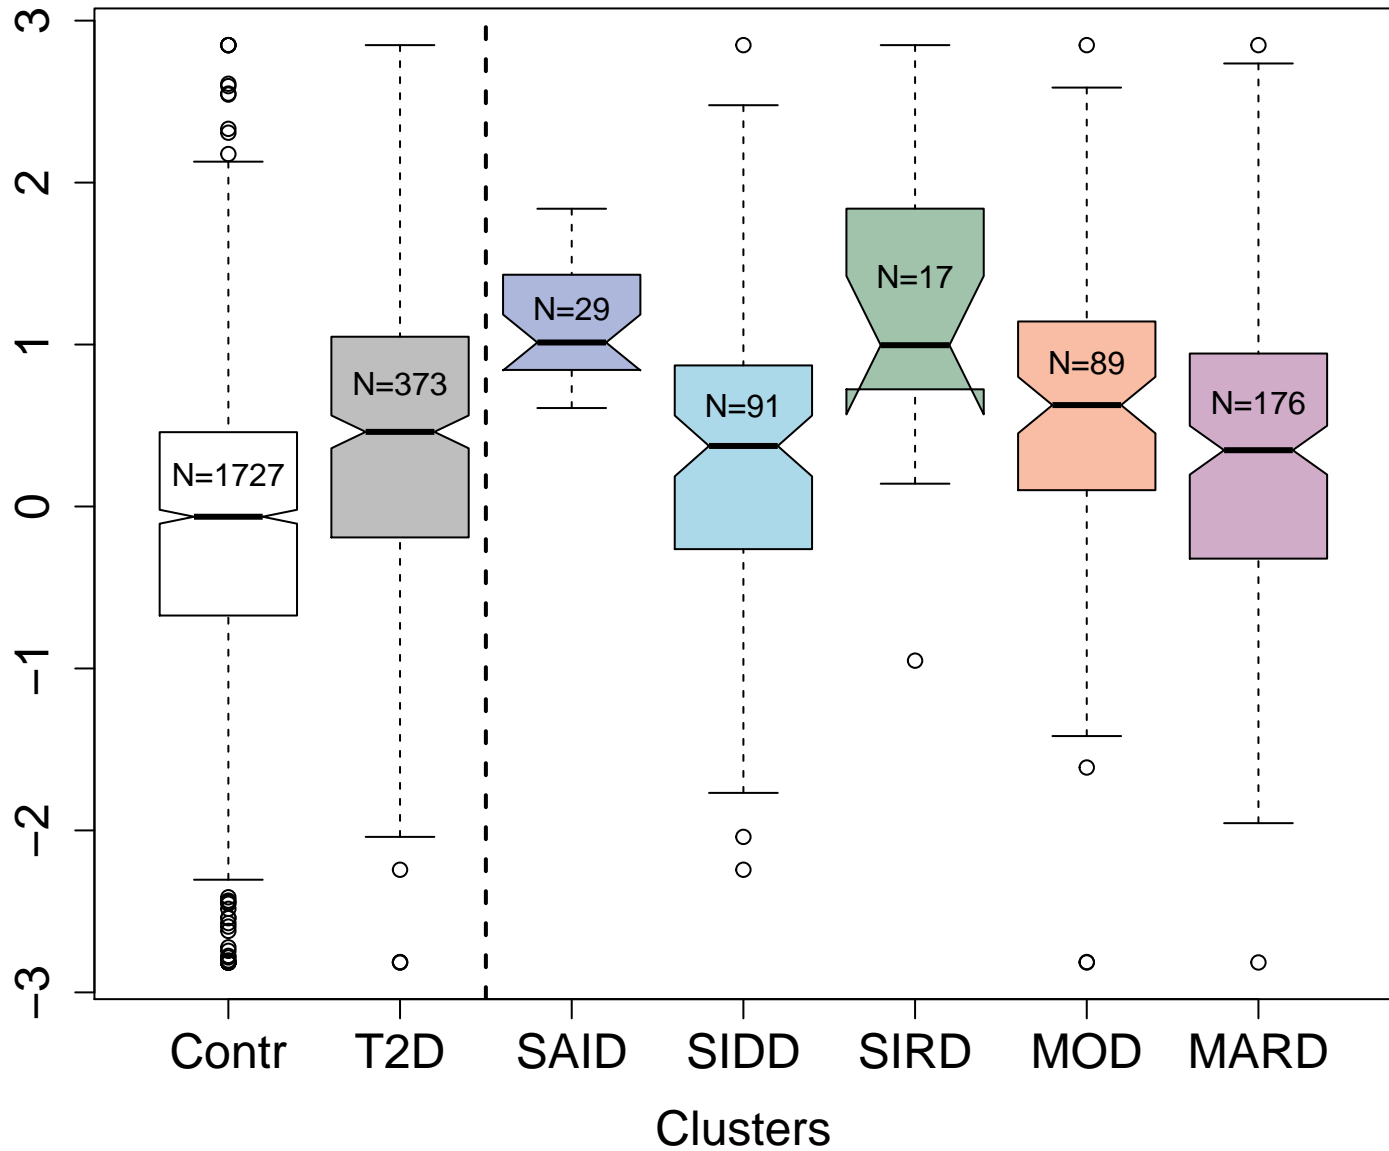

M1417 : kynurenate

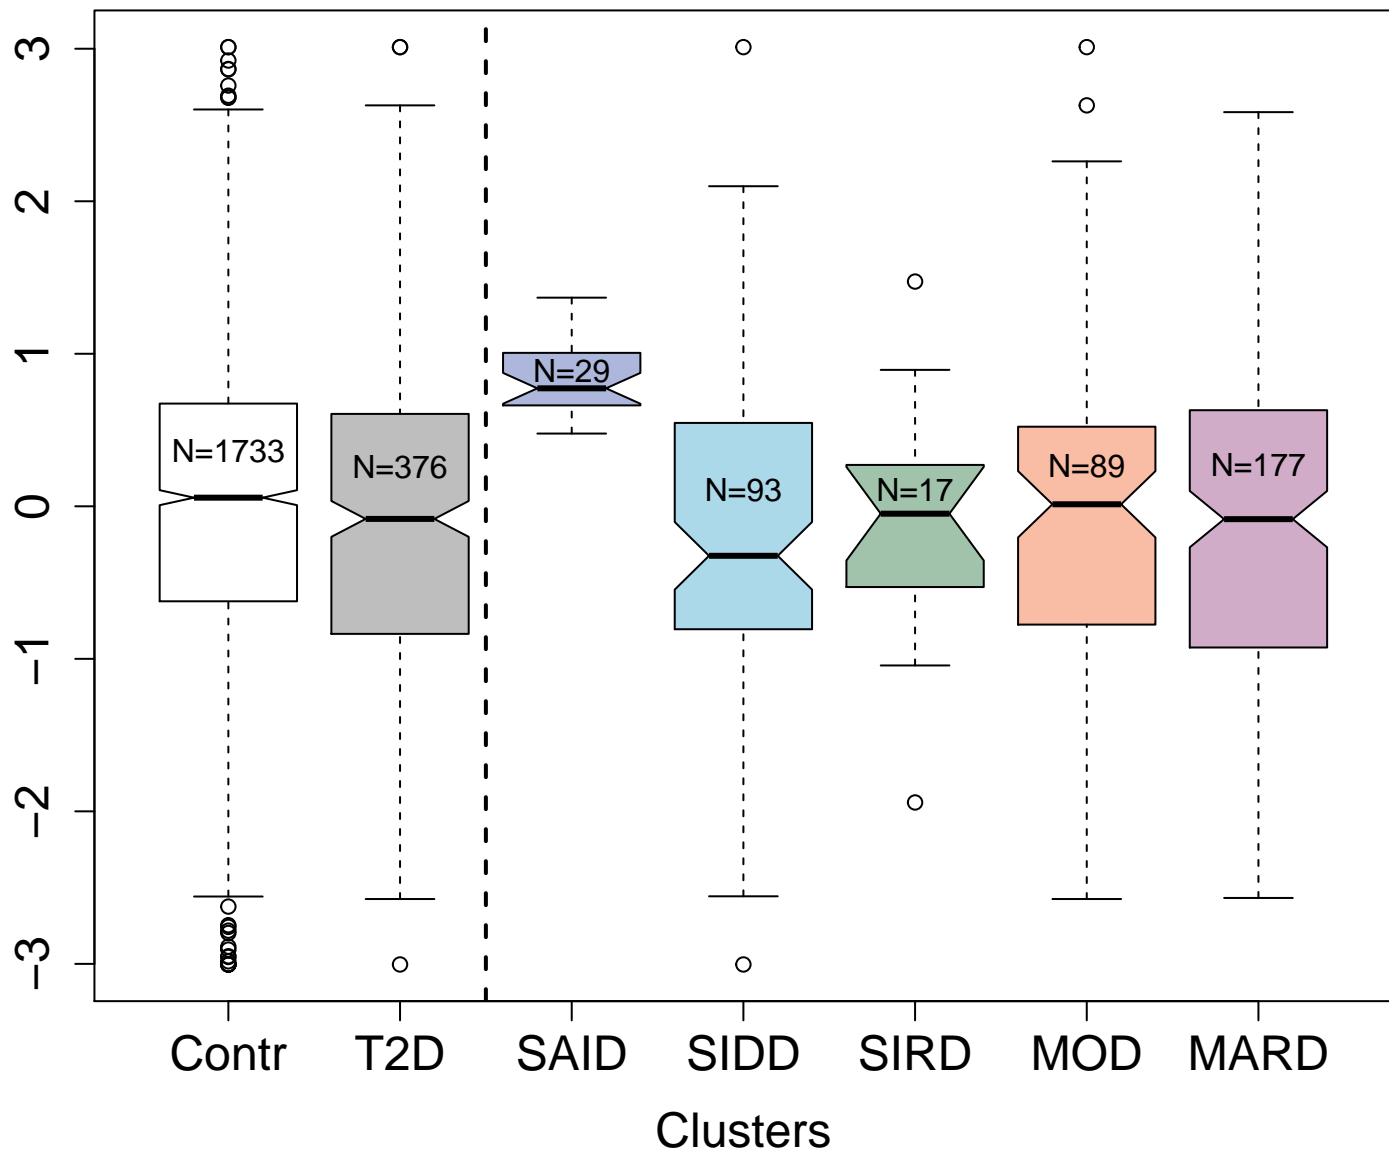

M32553 : phenol sulfate

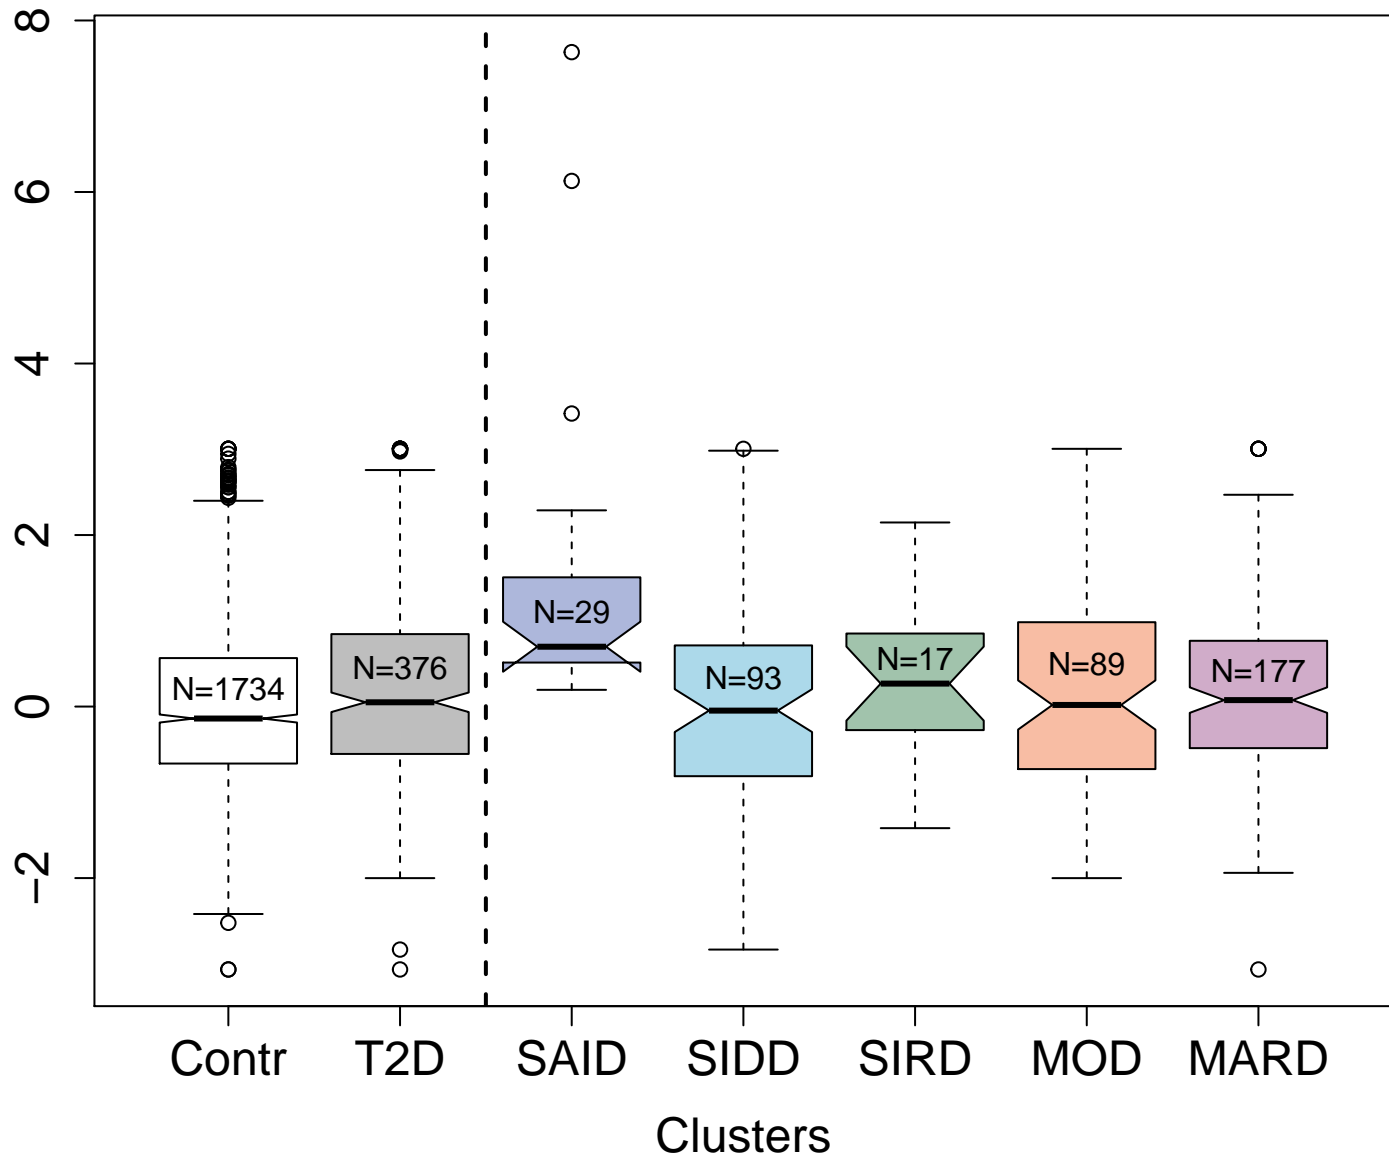

M47993 : X - 17010

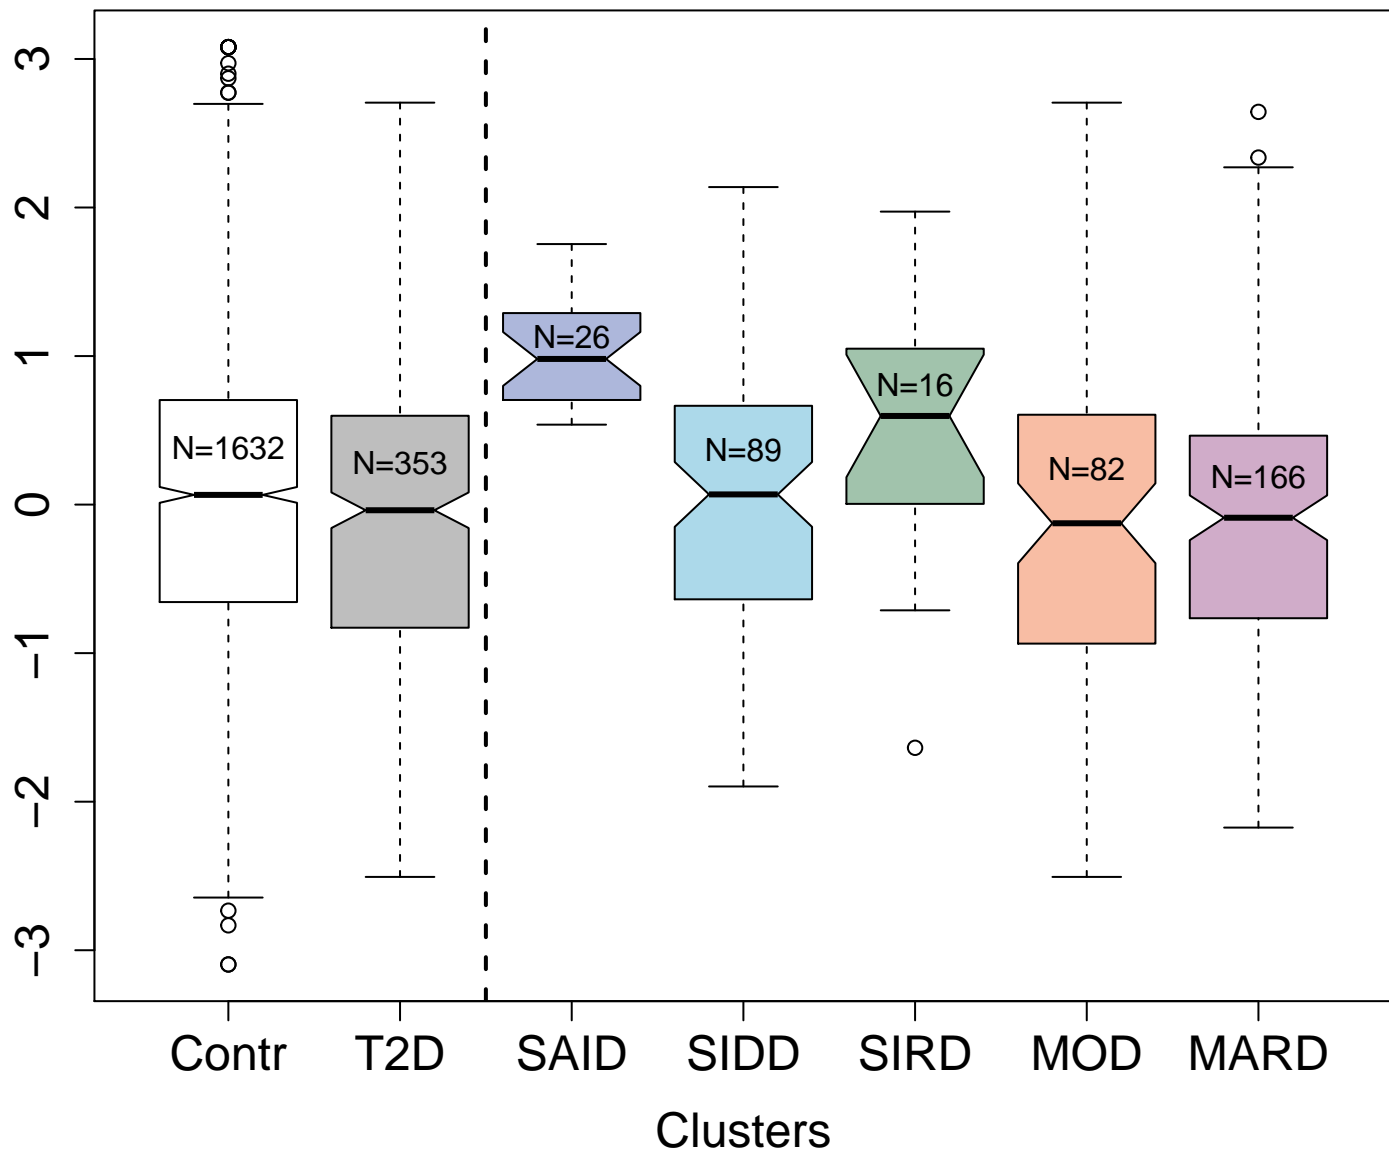

M33961 : 1-stearoyl-GPC (18:0)

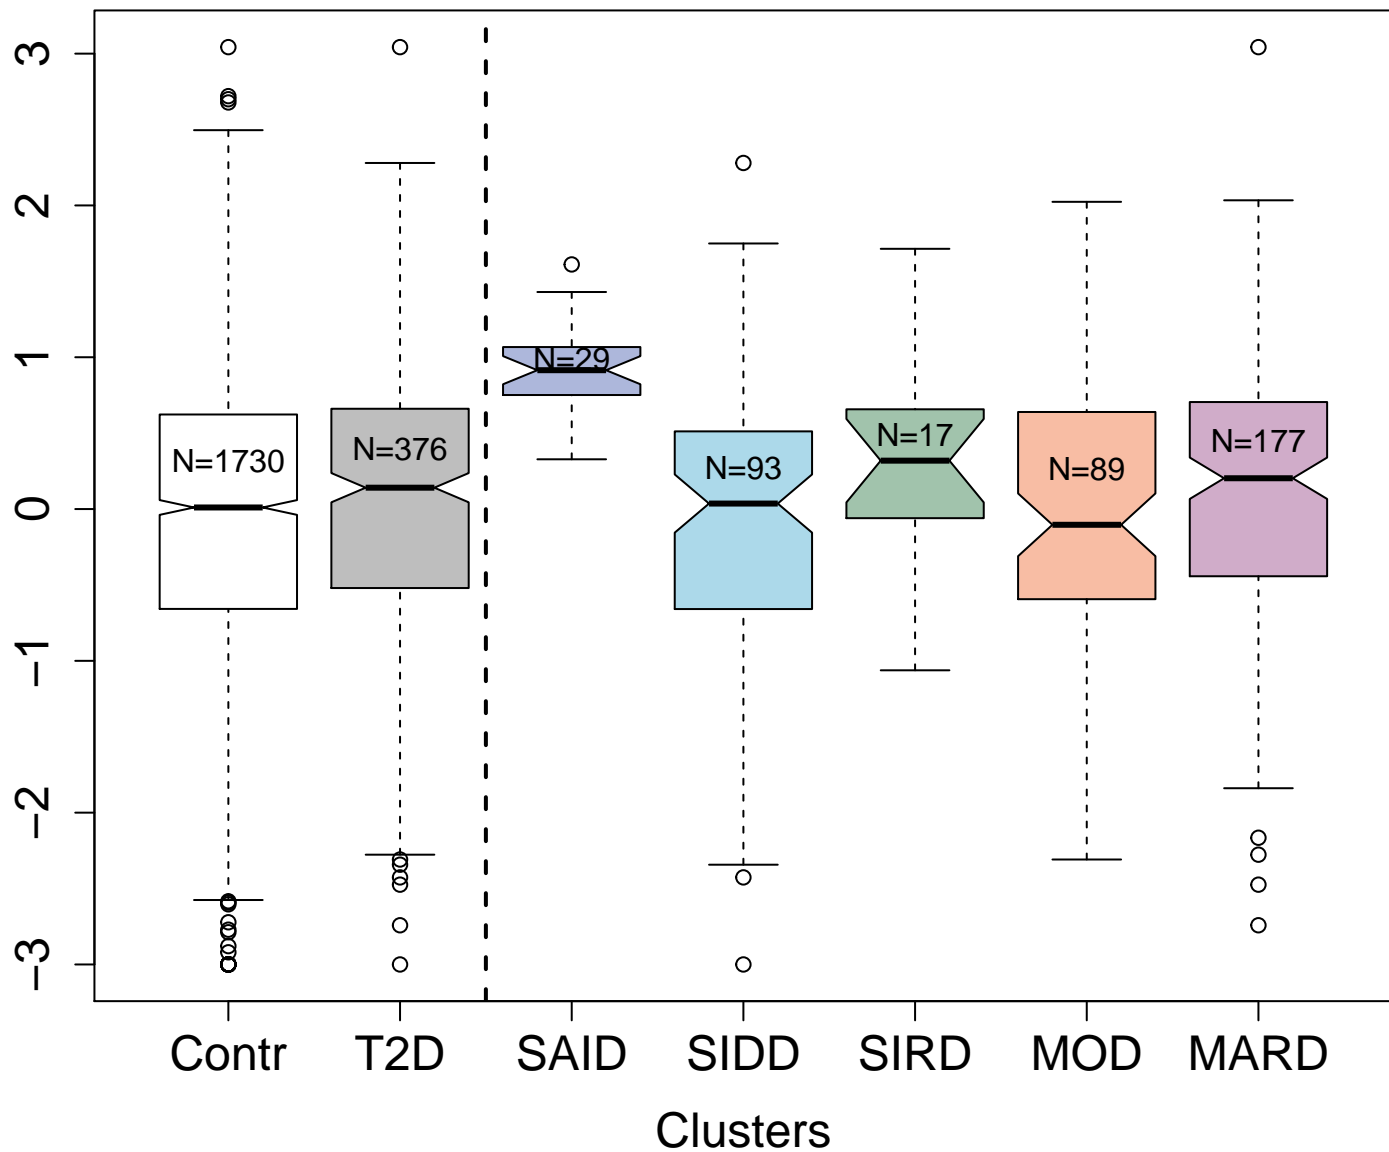



M48149 : N-acetylglucosaminylasparagine

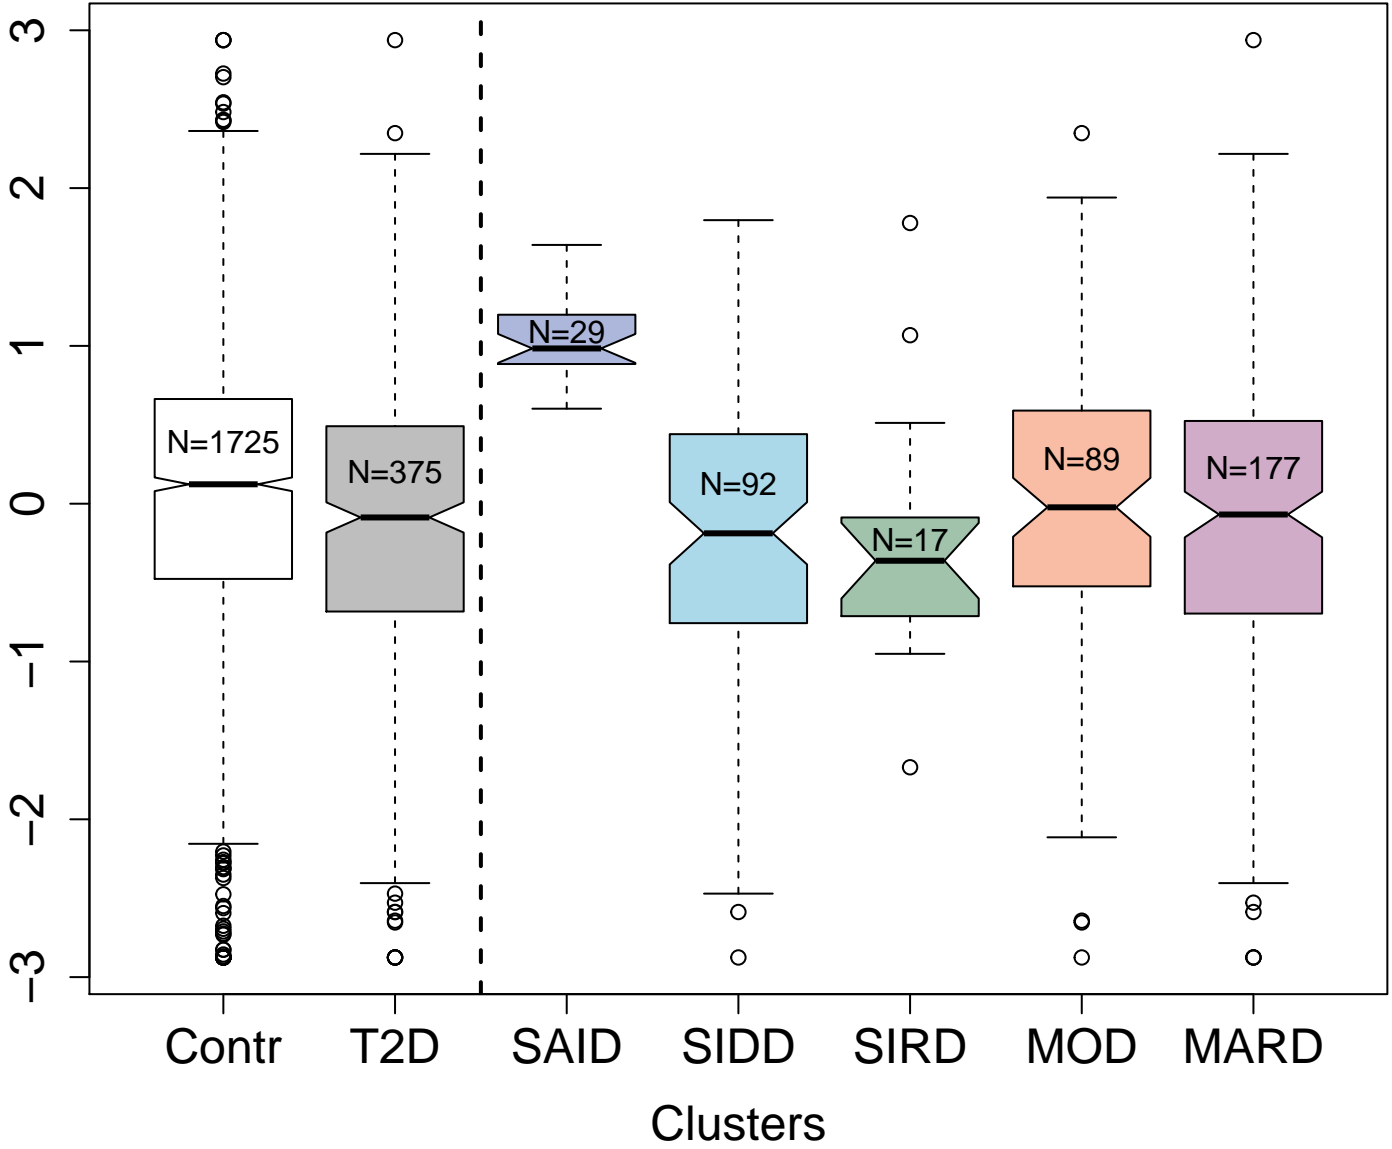

M62297 : sulfate of piperine metabolite C18H21NO3 (1)\*

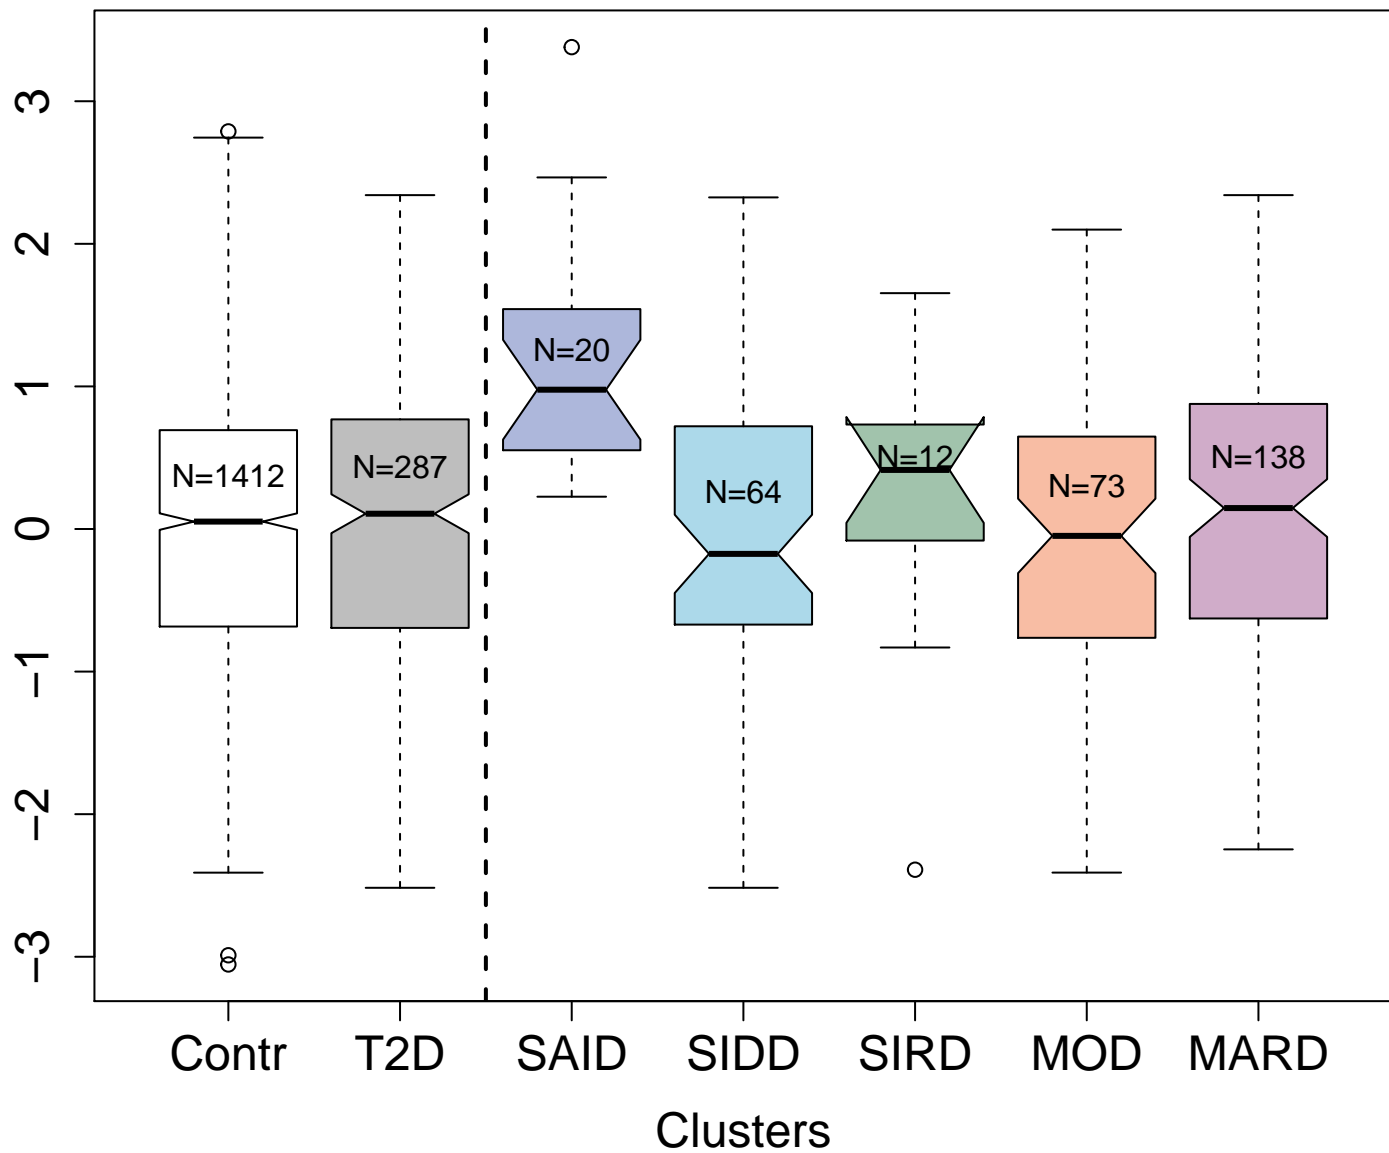

M62521 : X - 25279

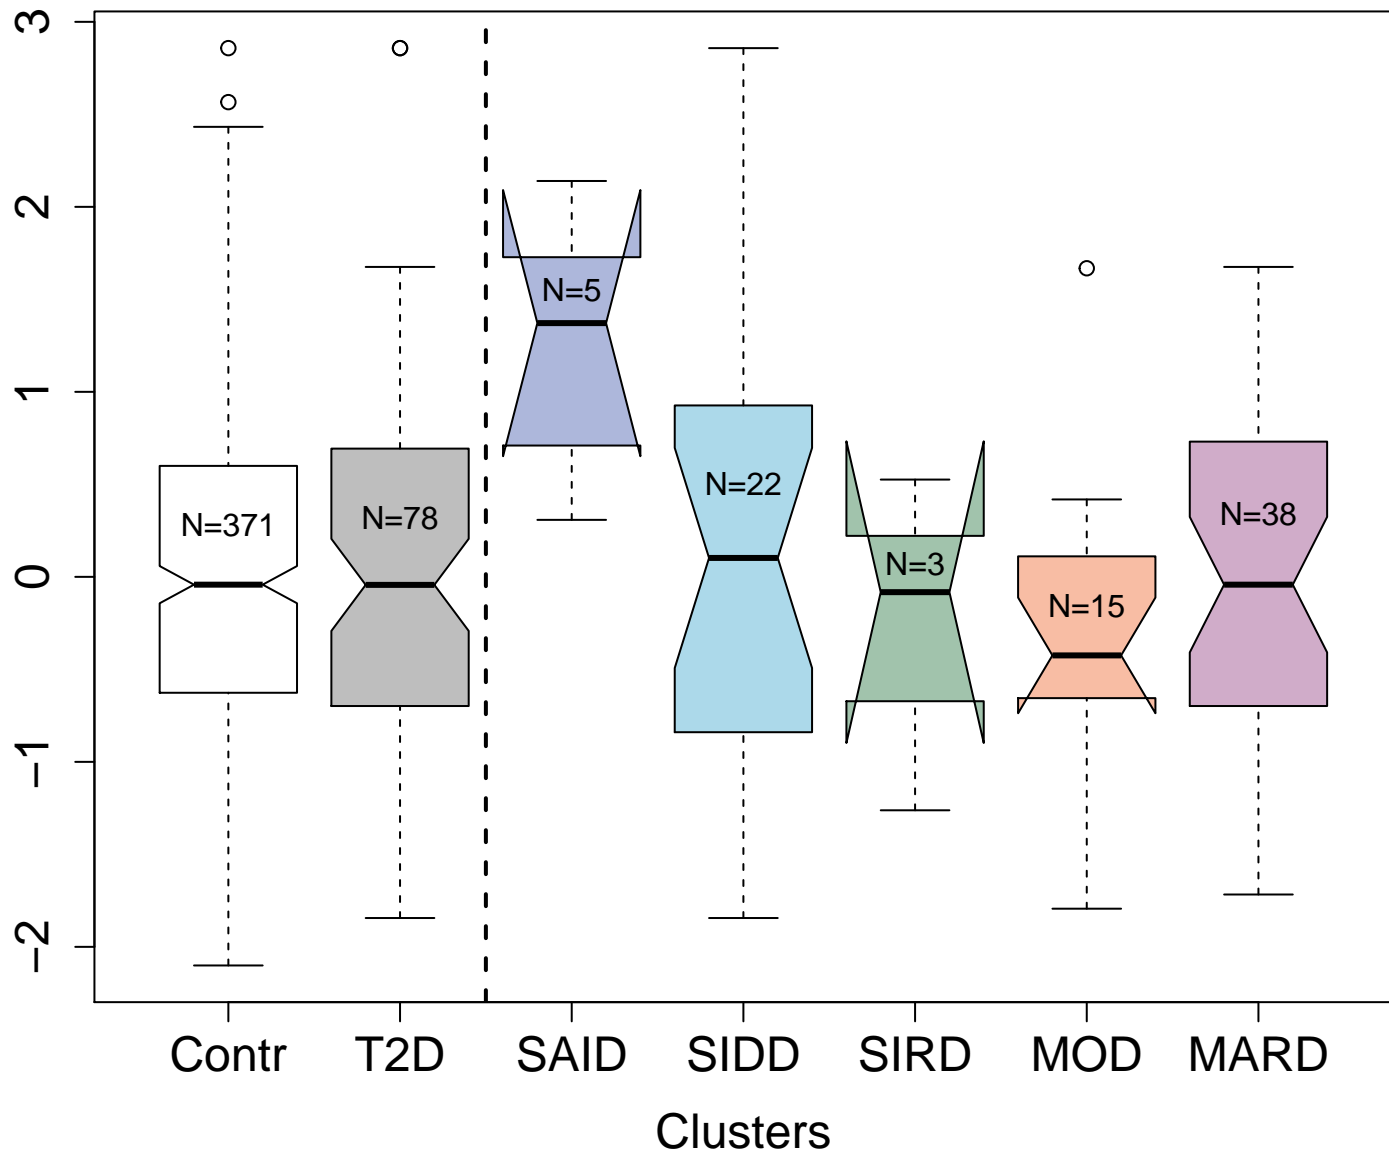

M52436 : tricosanoyl sphingomyelin (d18:1/23:0)\*

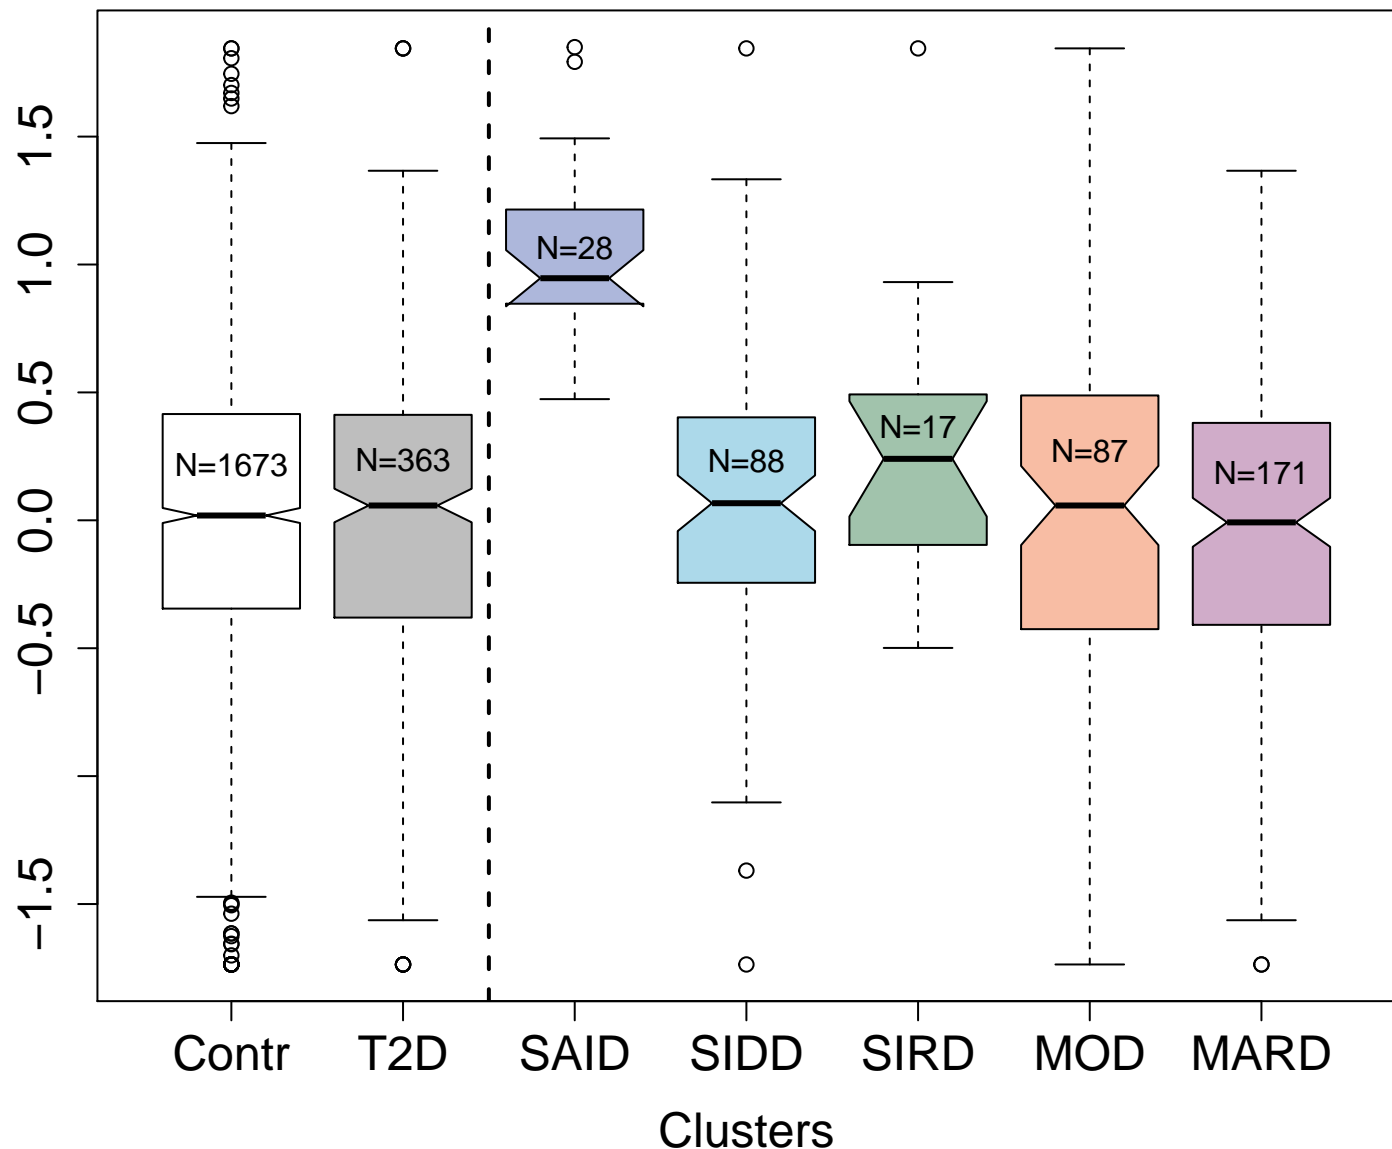

M62890 : taurochenodeoxycholic acid 3-sulfate

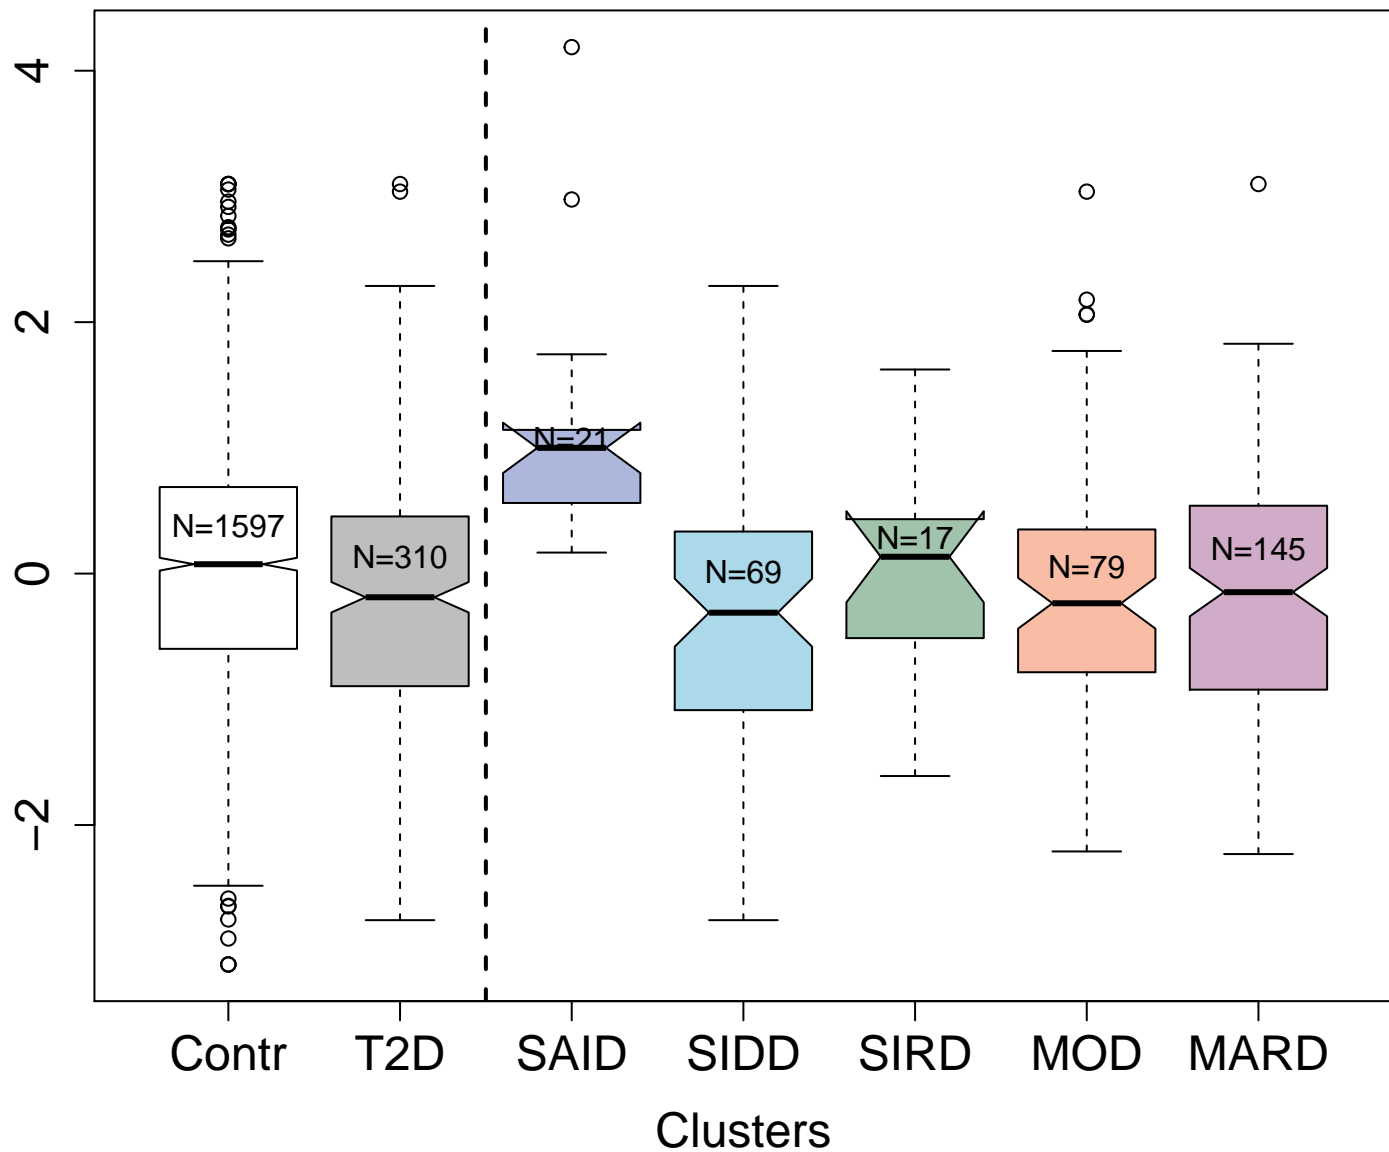

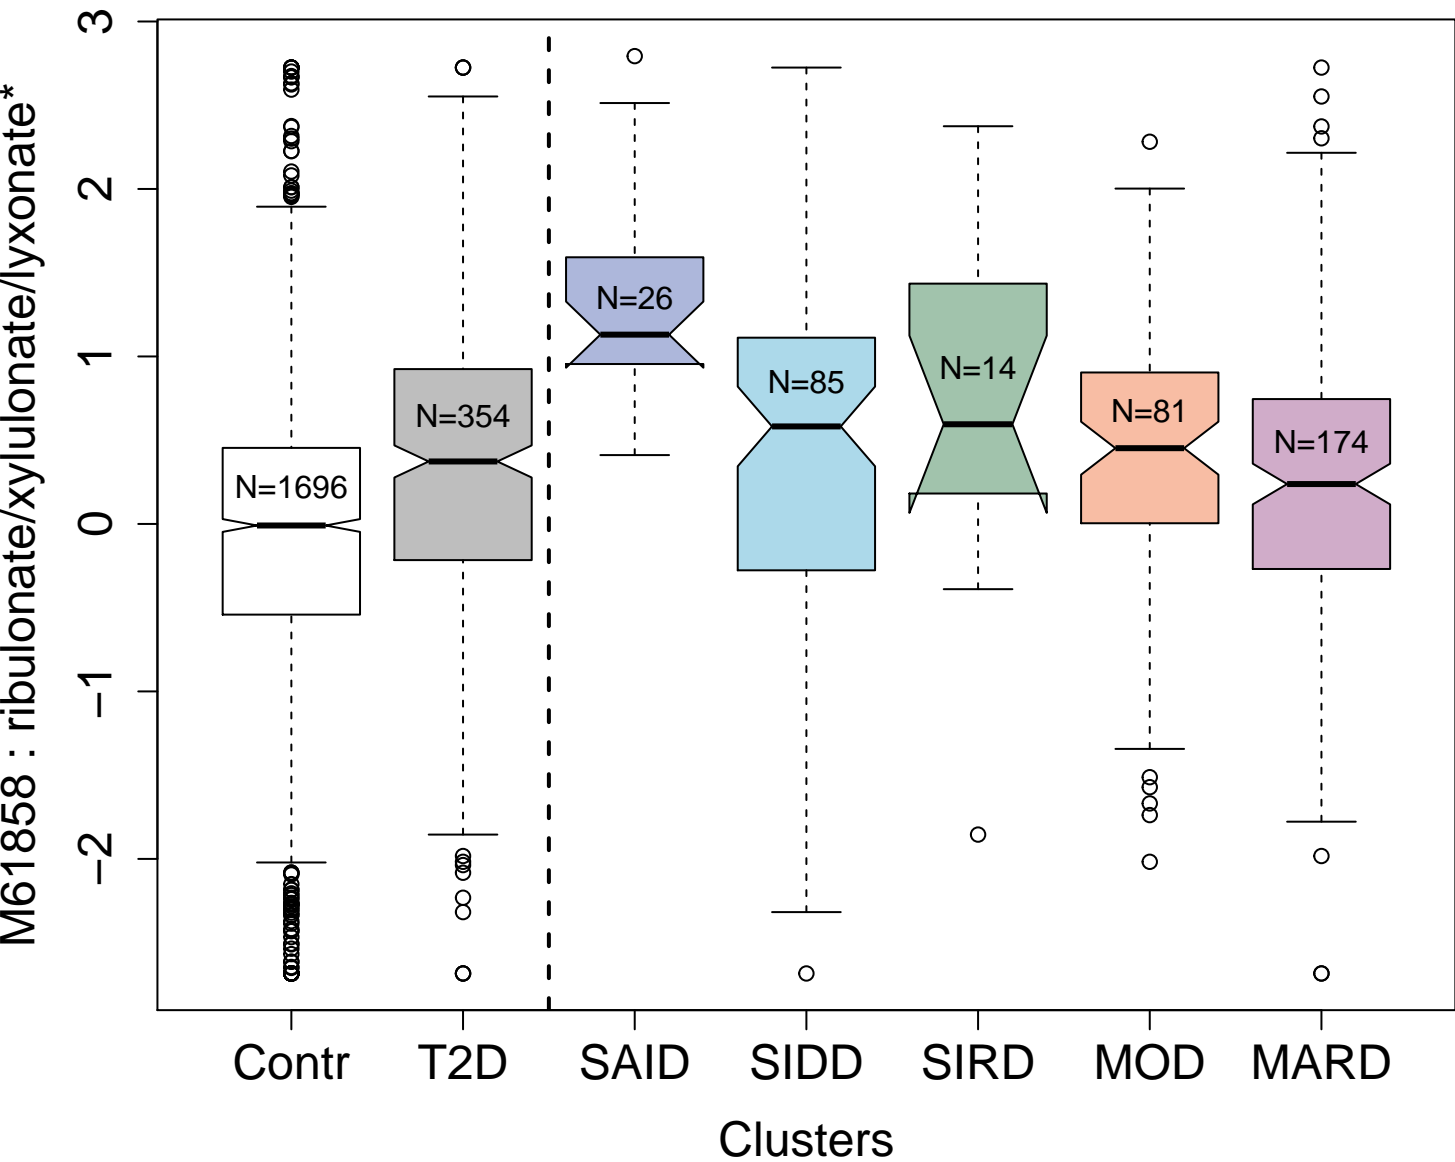

M48696 : maltol sulfate

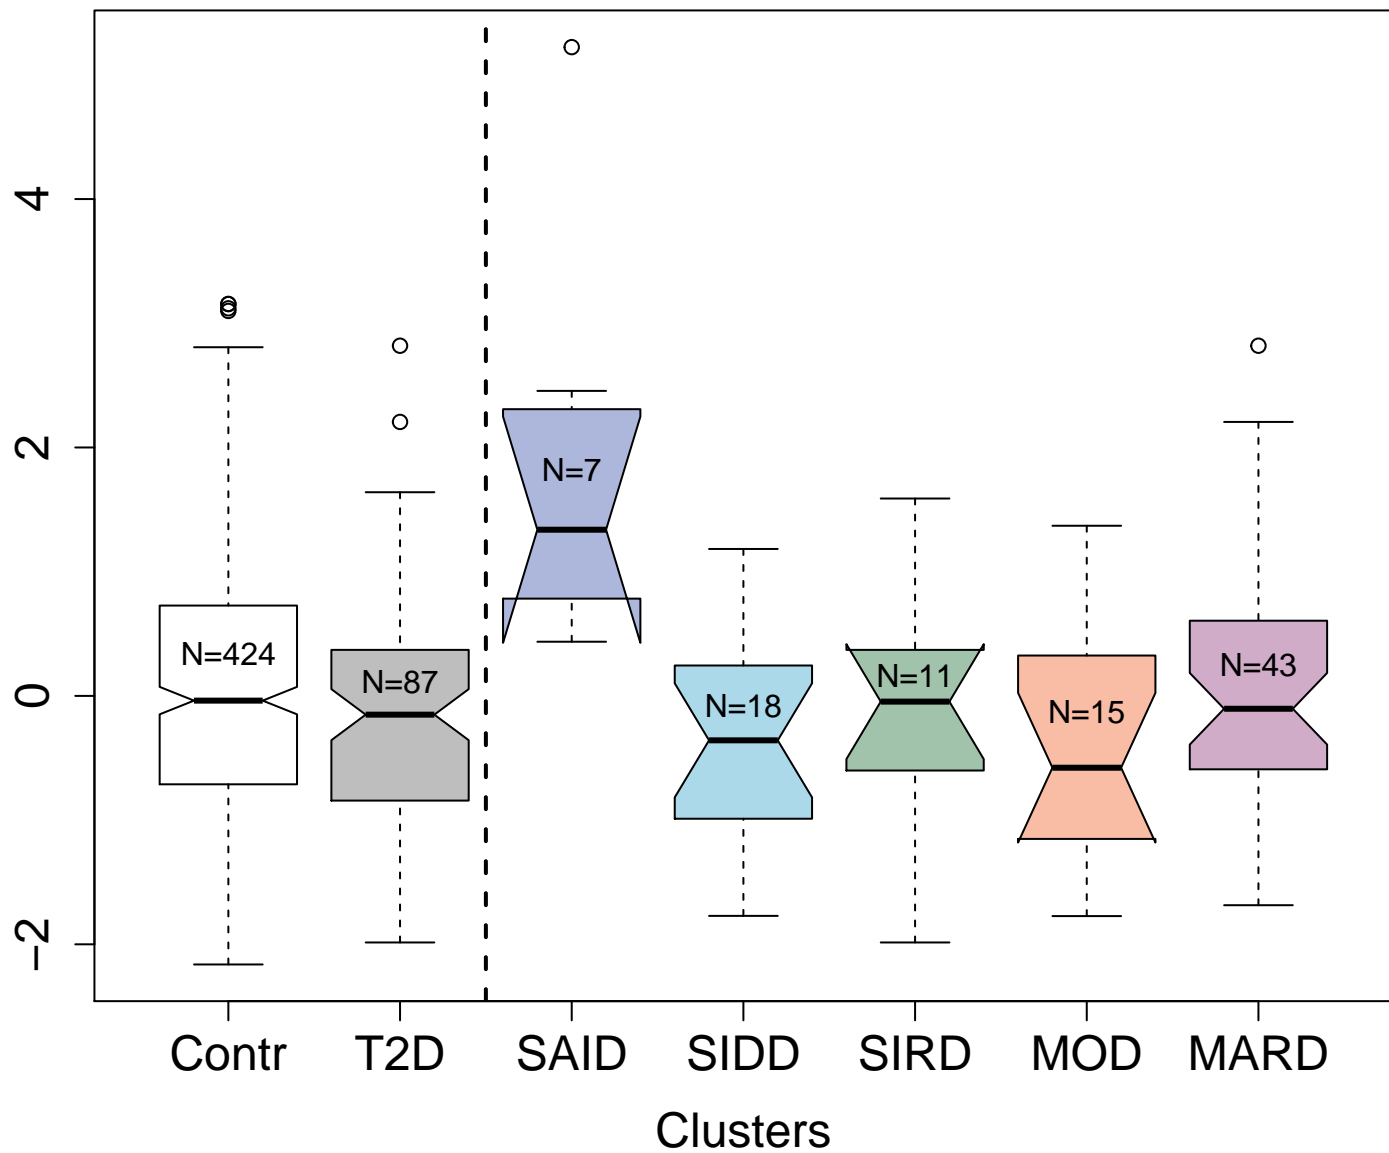

M47818 : X - 17328

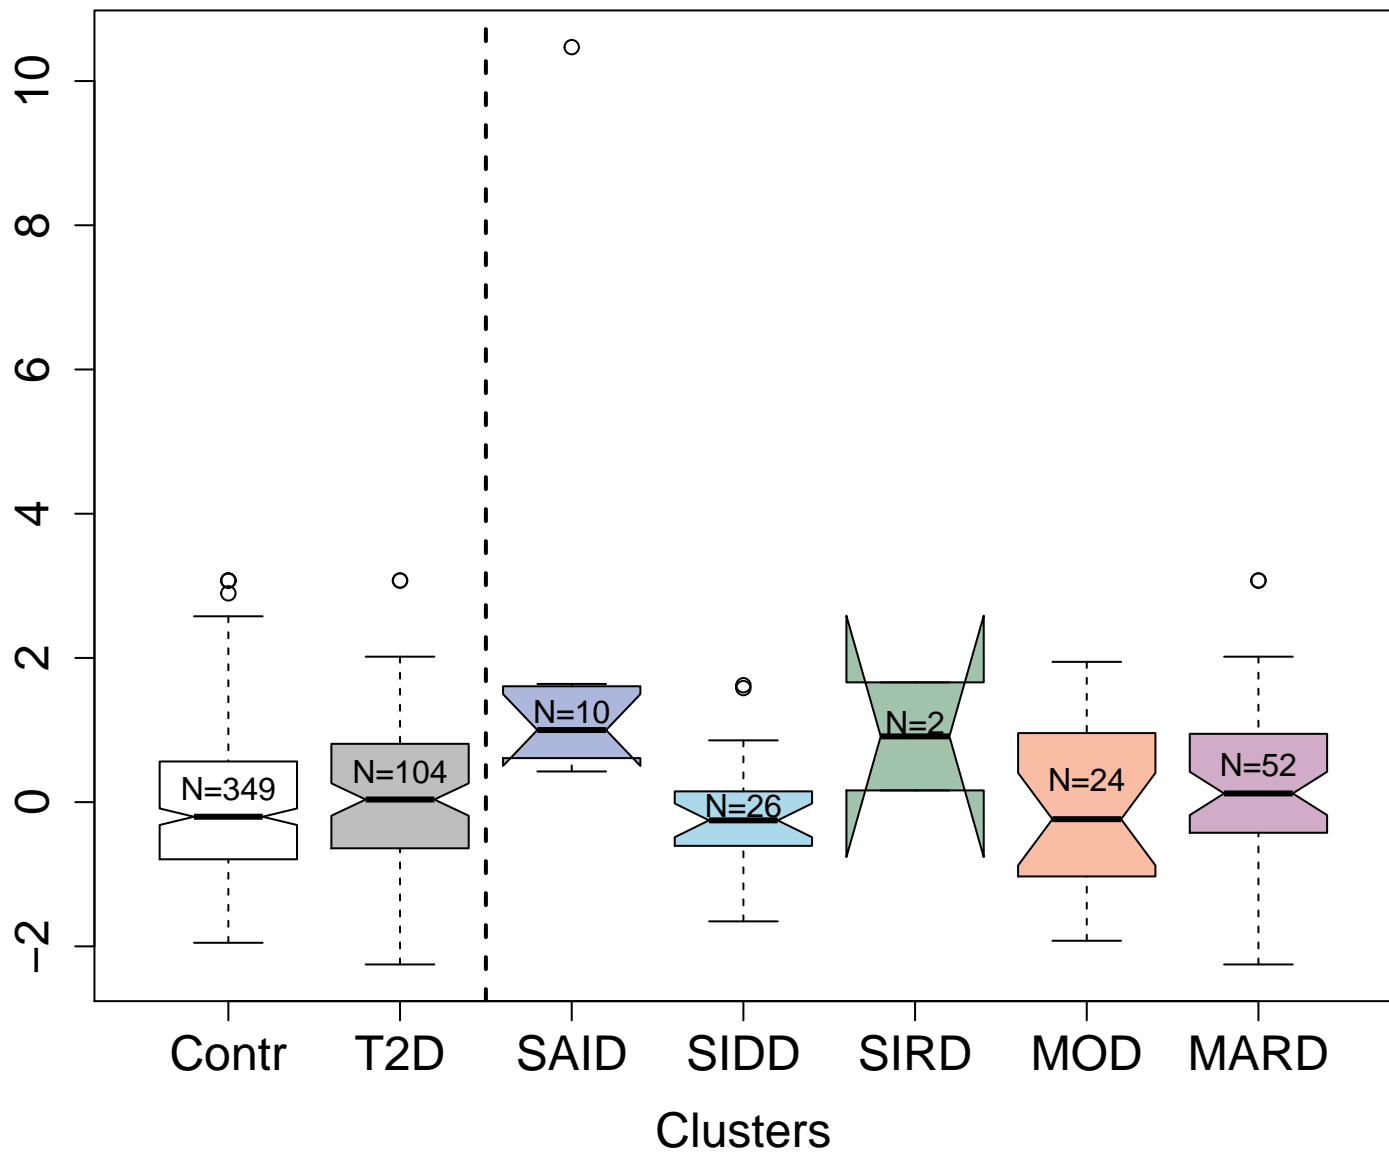



M52892 : X - 24571

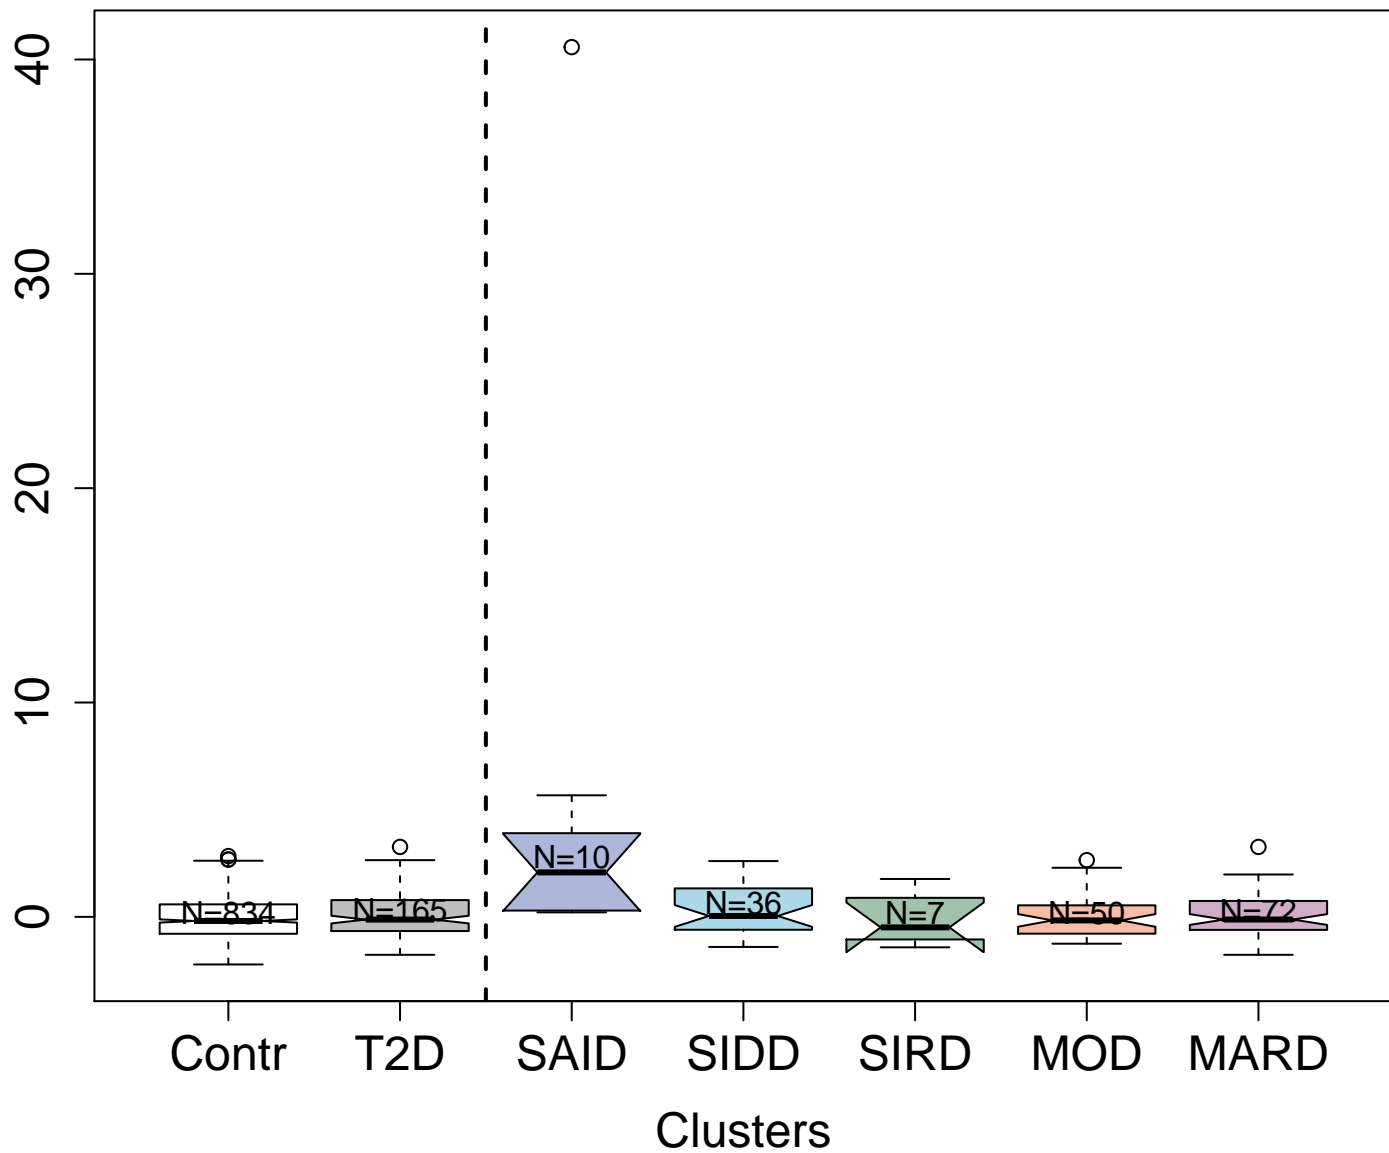

M64049 : 2-methoxyhydroquinone sulfate (1)

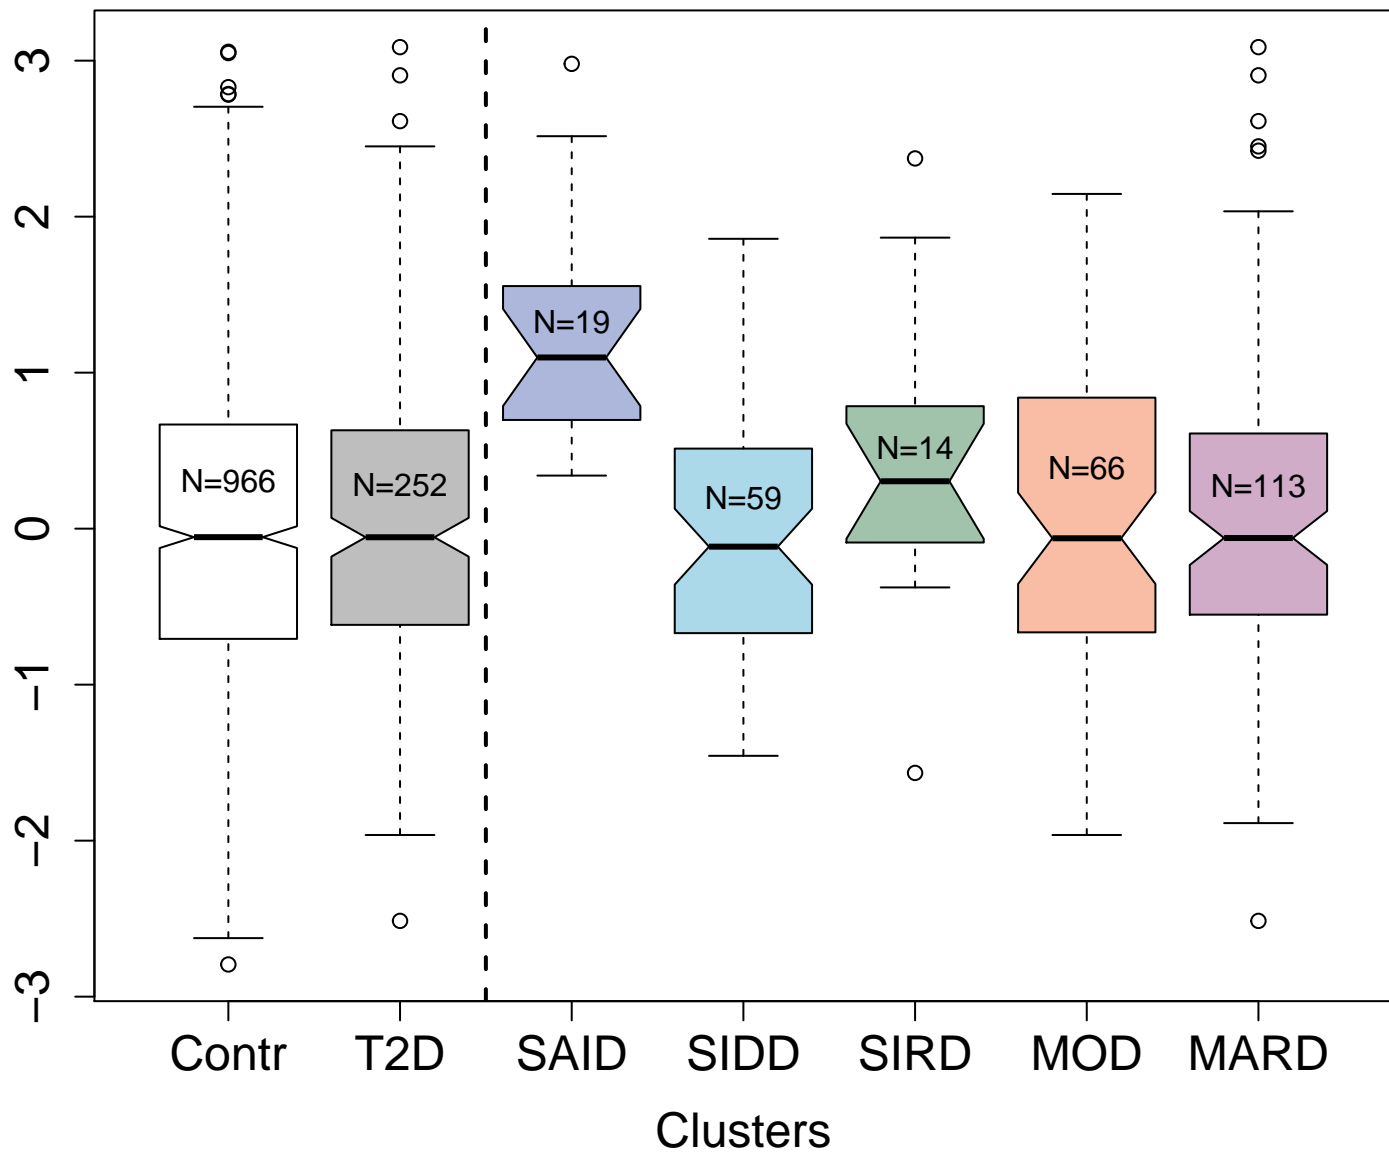

M48448 : 3-hydroxypyridine sulfate

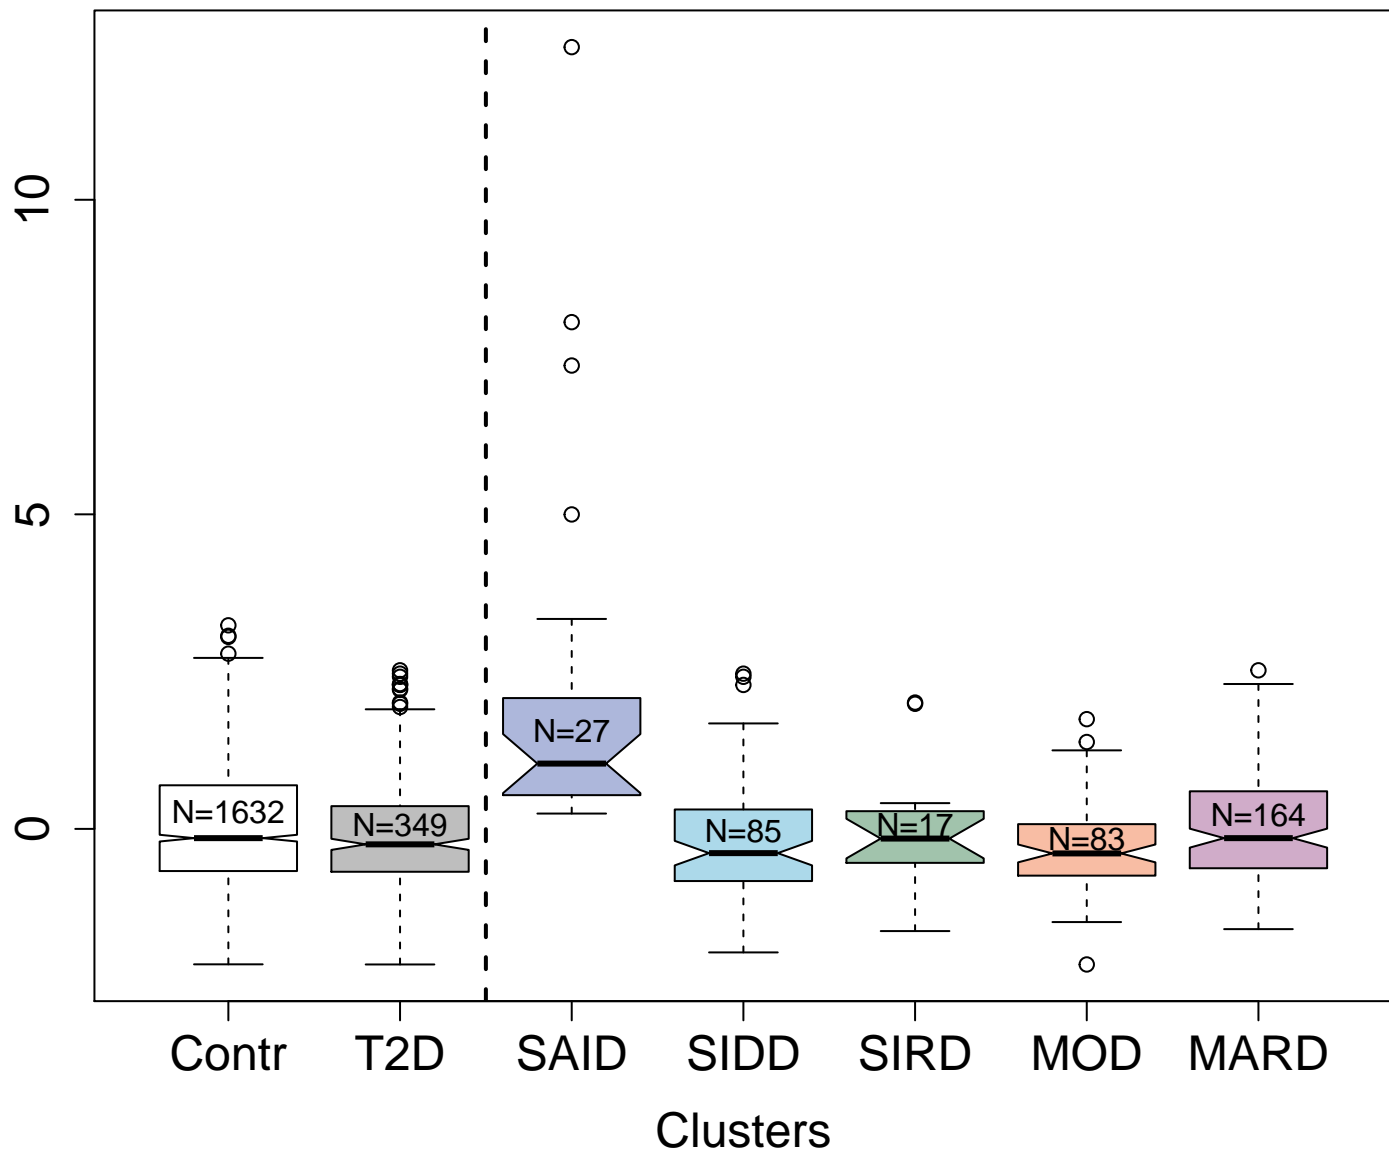

M57577 : isoursodeoxycholate

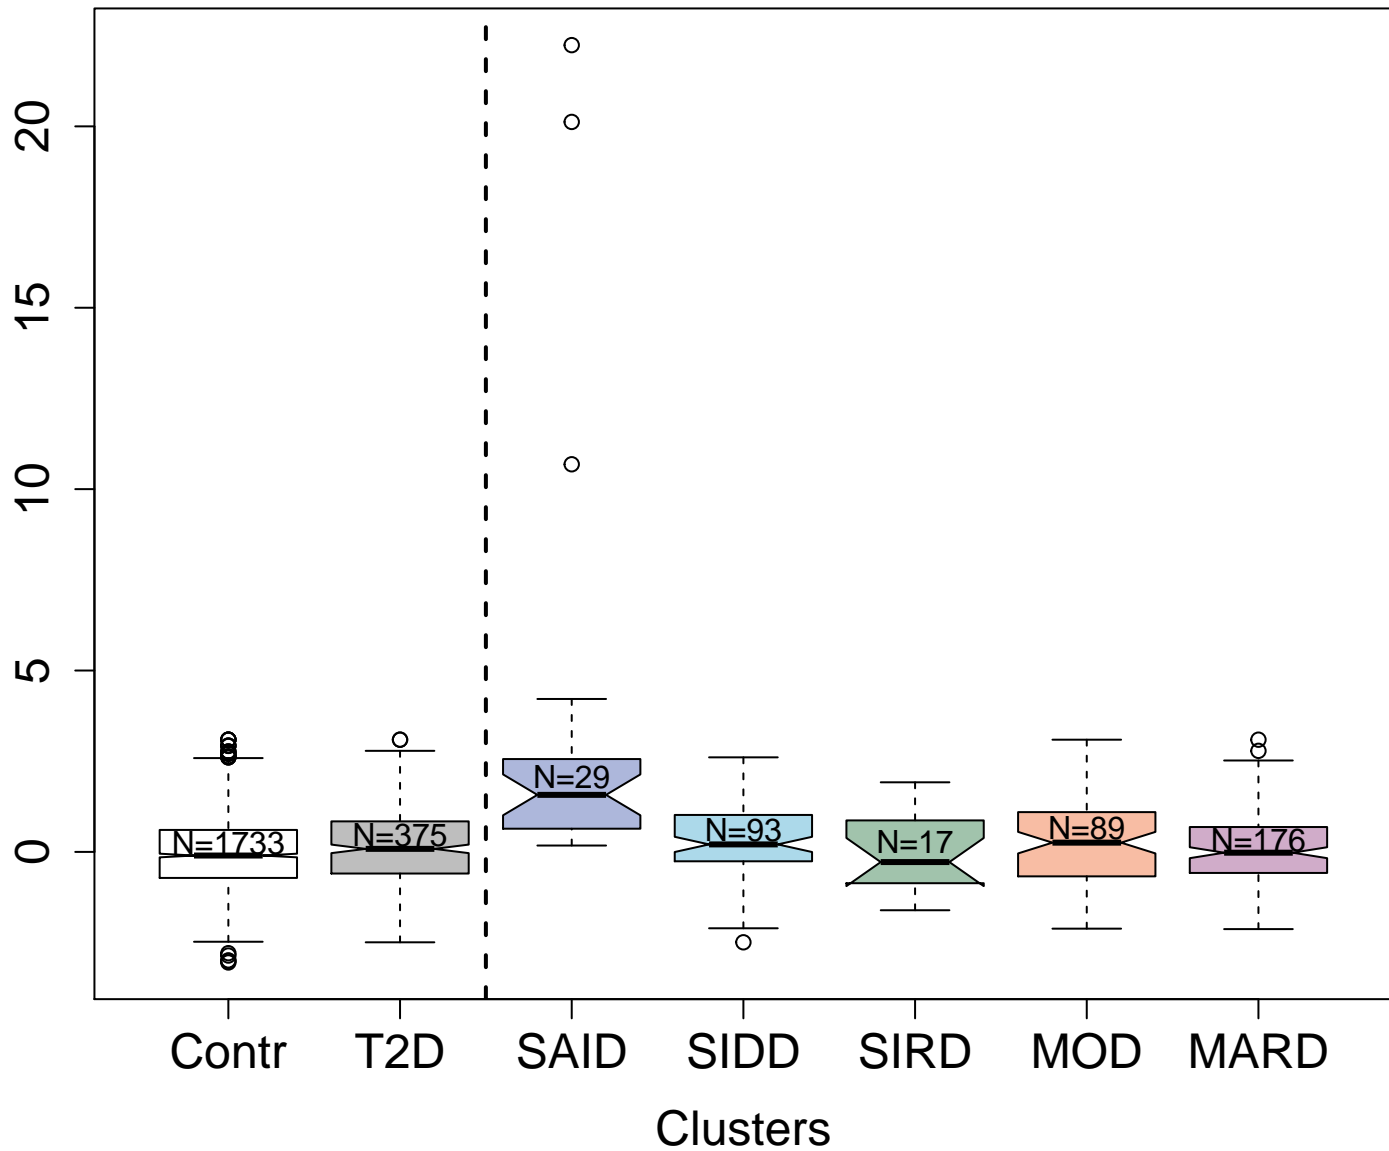

M46611: X - 12013

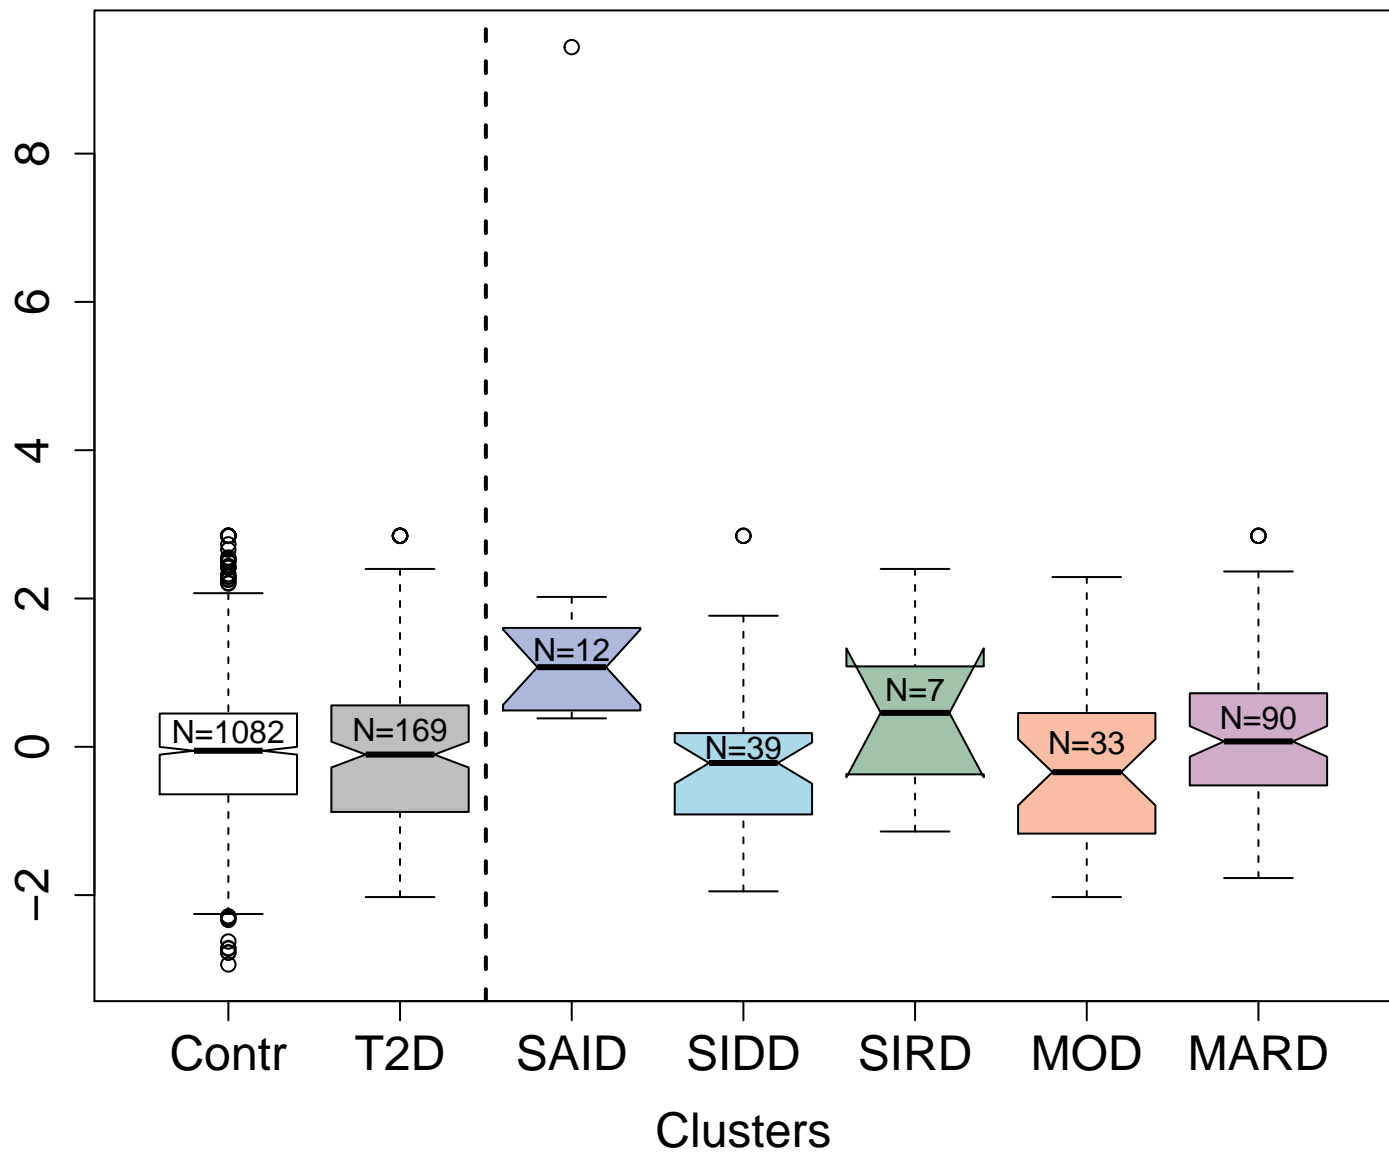

M46992 : X - 21815

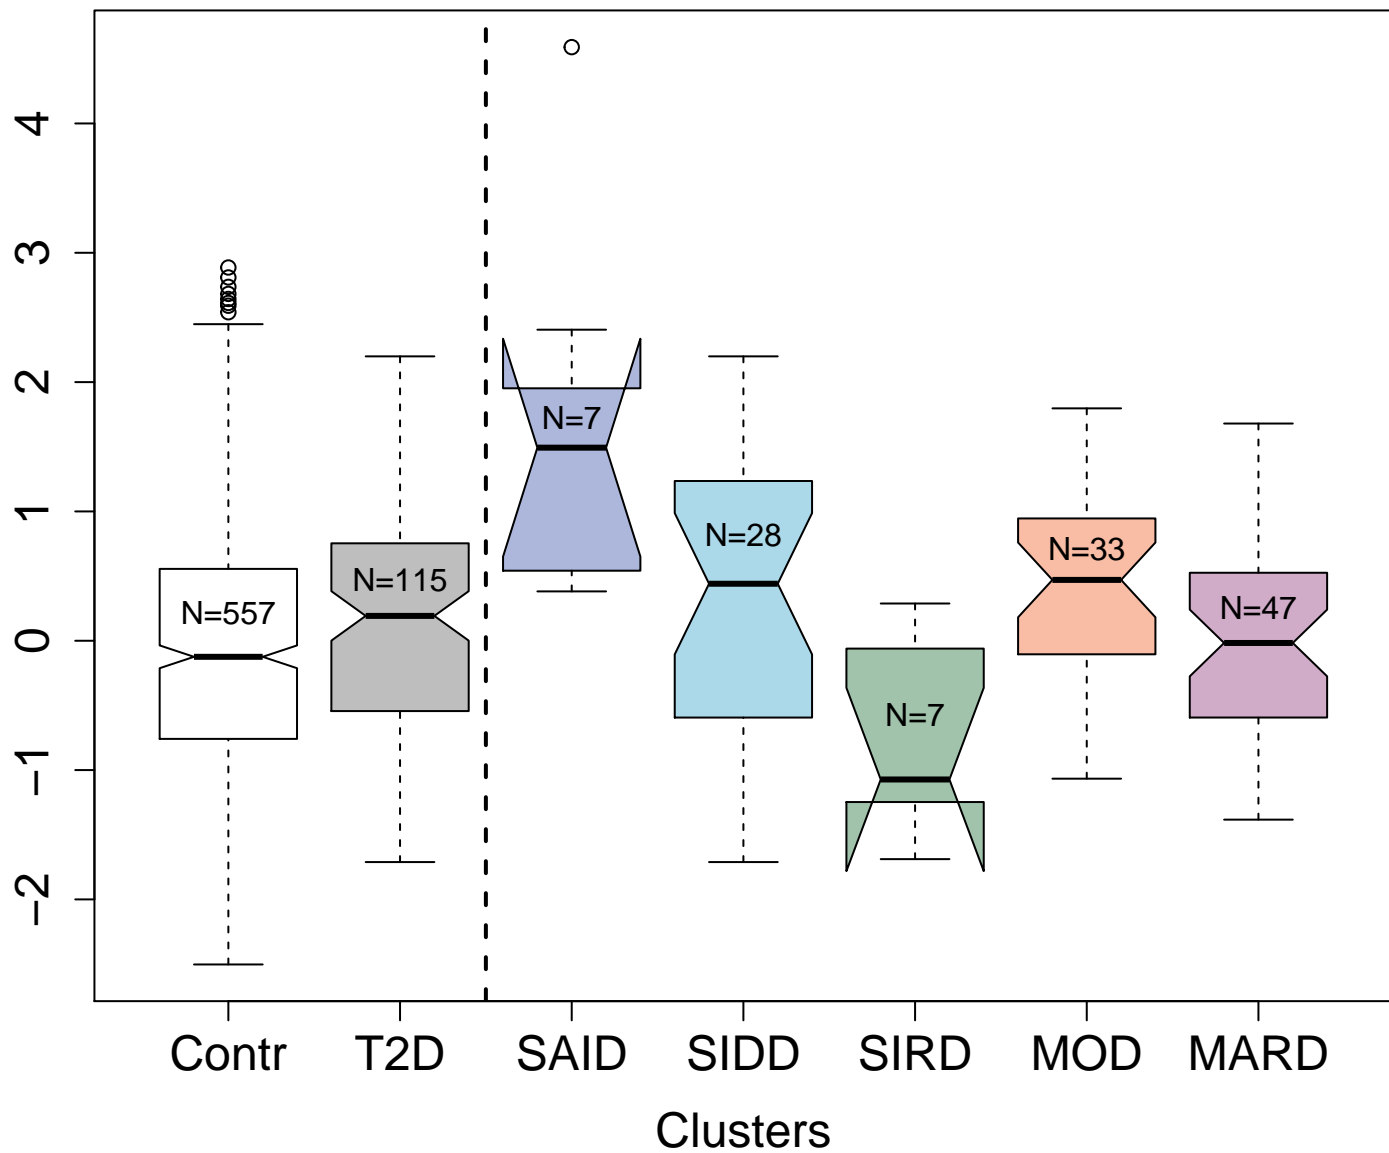

M54805 : 3beta-hydroxy-5-cholestenoate

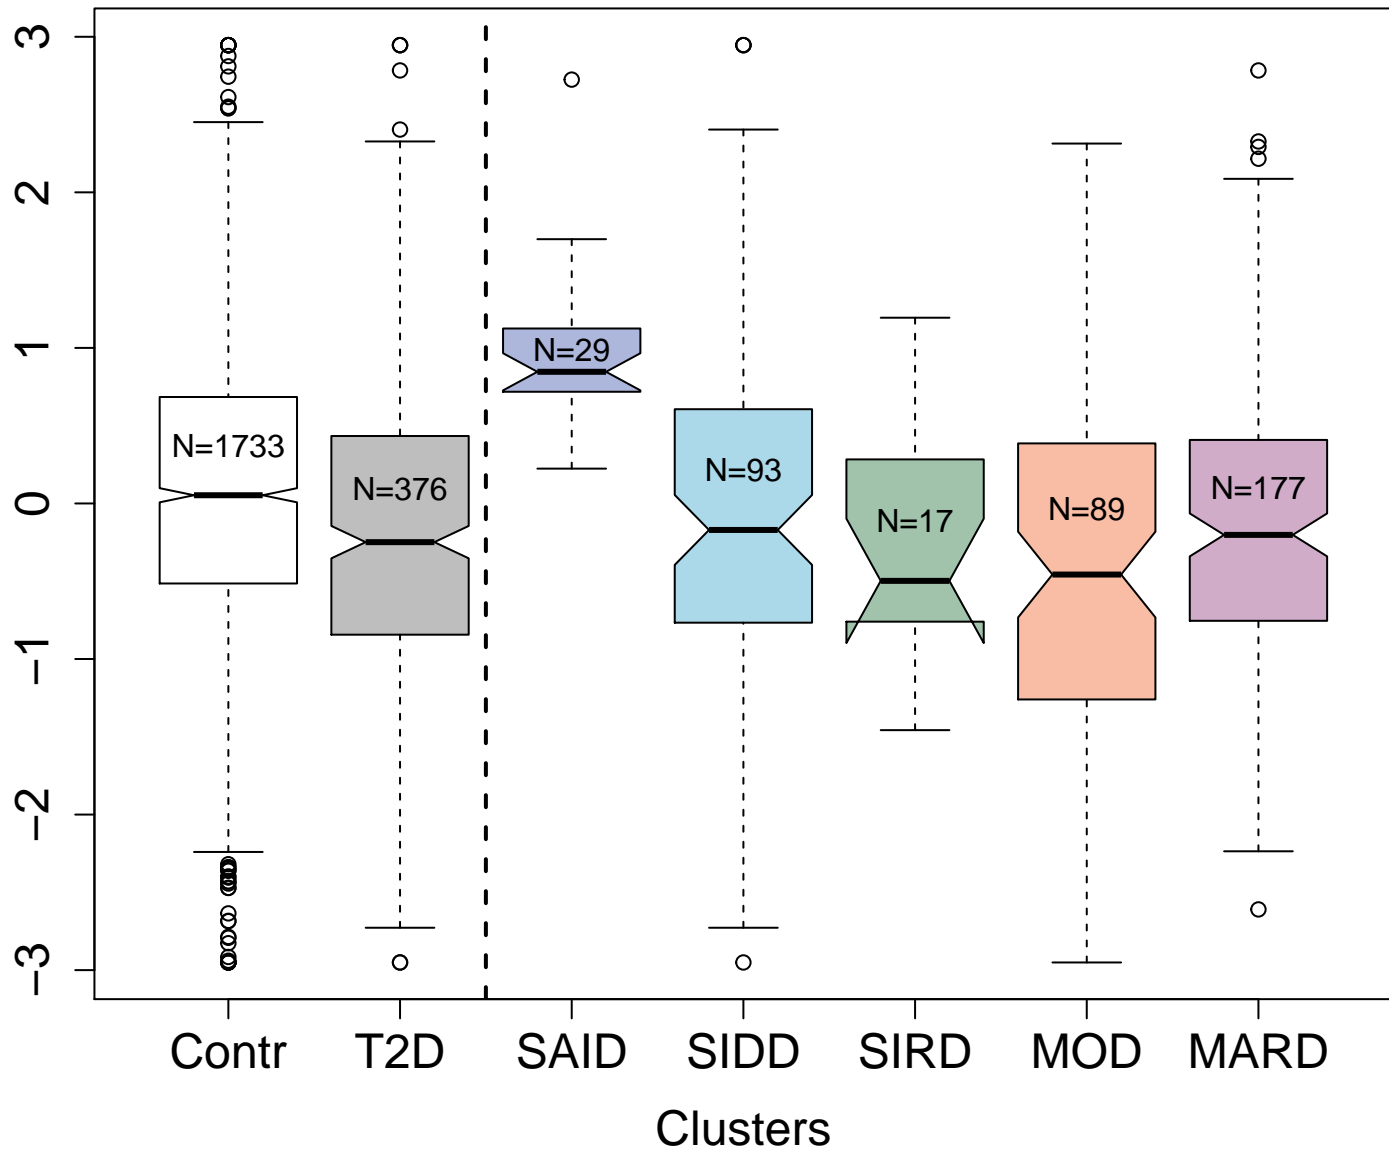

M46666 : X - 15728

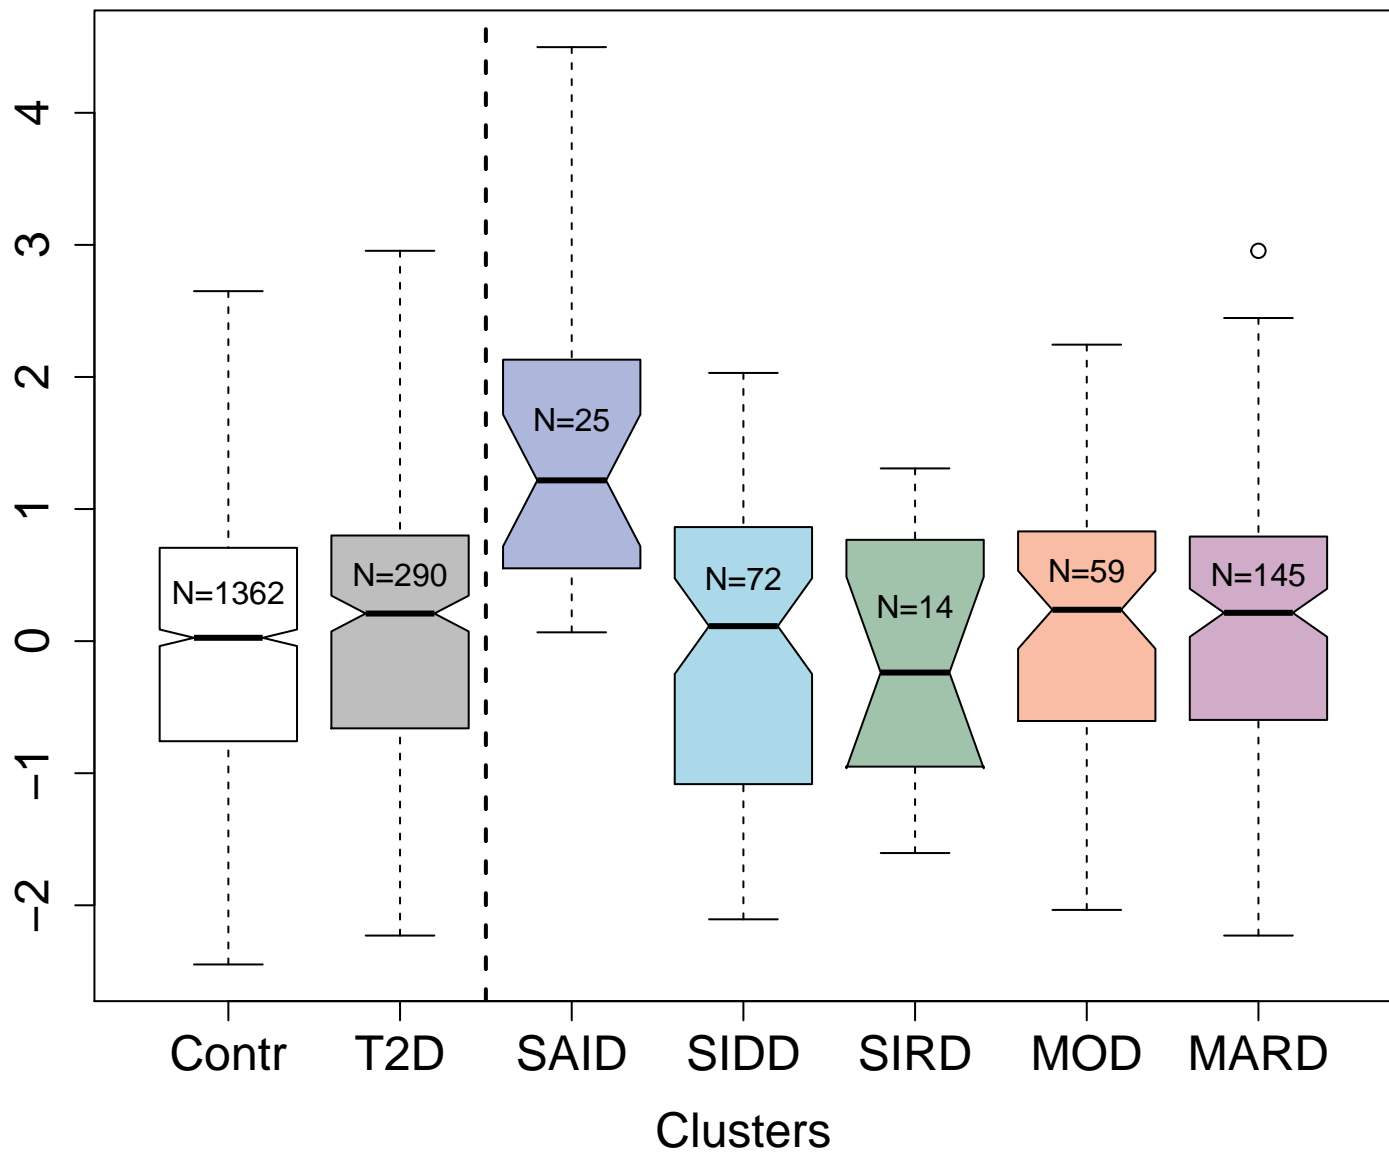



M38168 : 16 $\alpha$ -hydroxy DHEA 3-sulfate

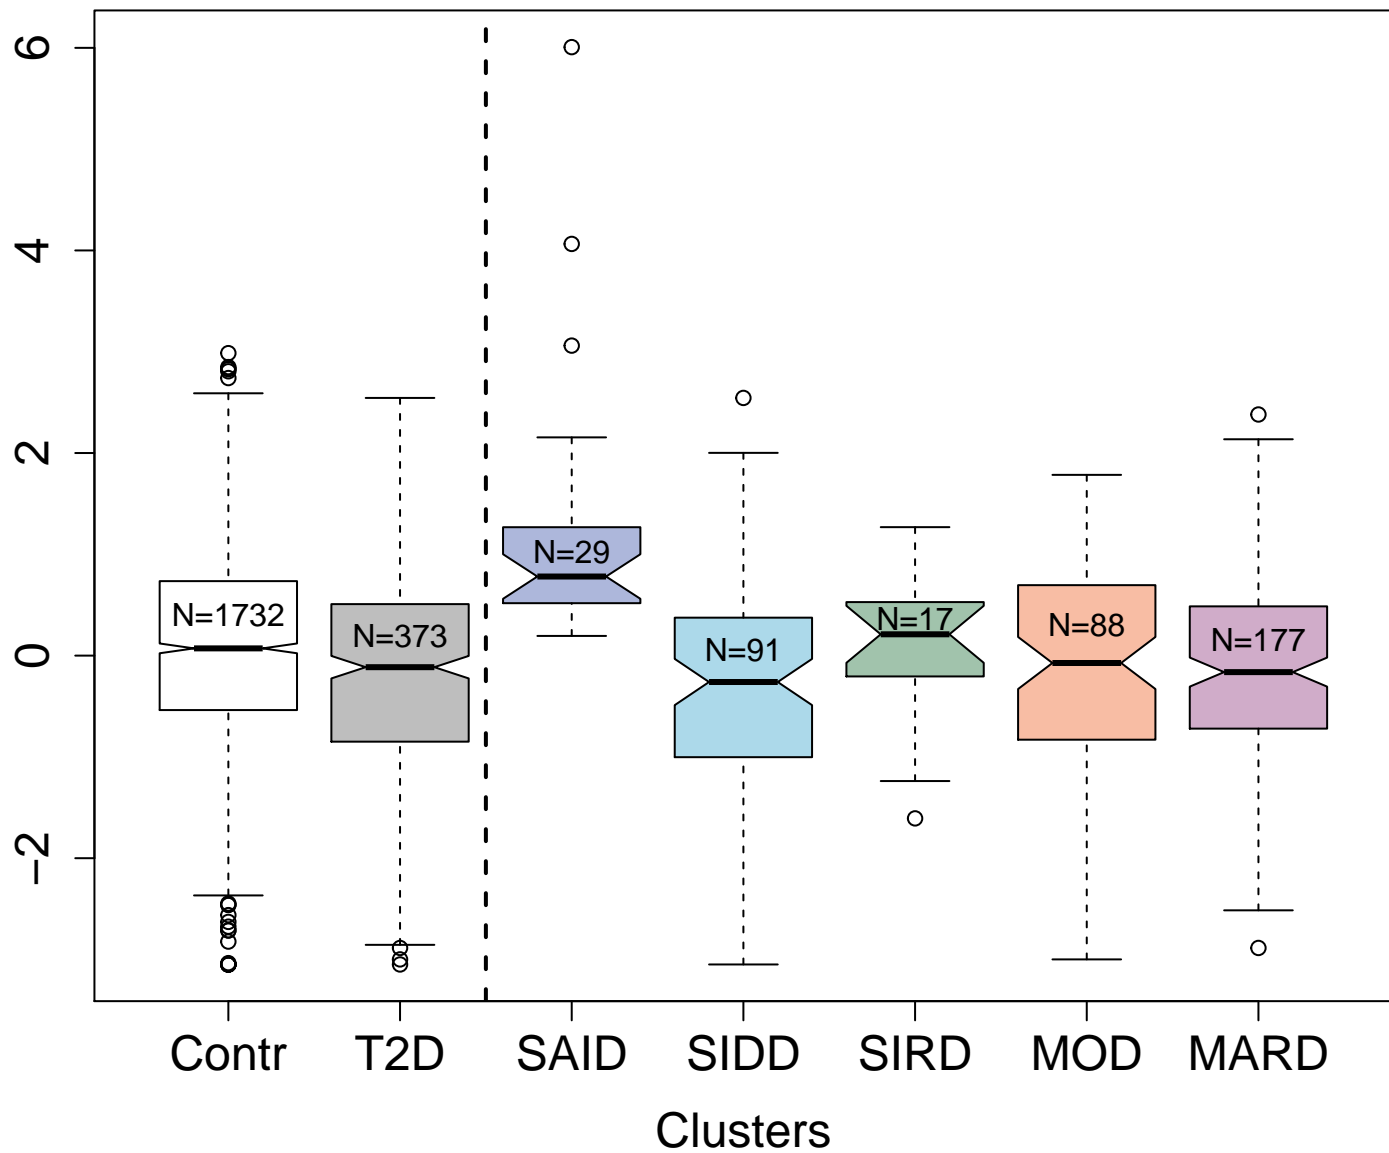

M62520 : 2-naphthol sulfate

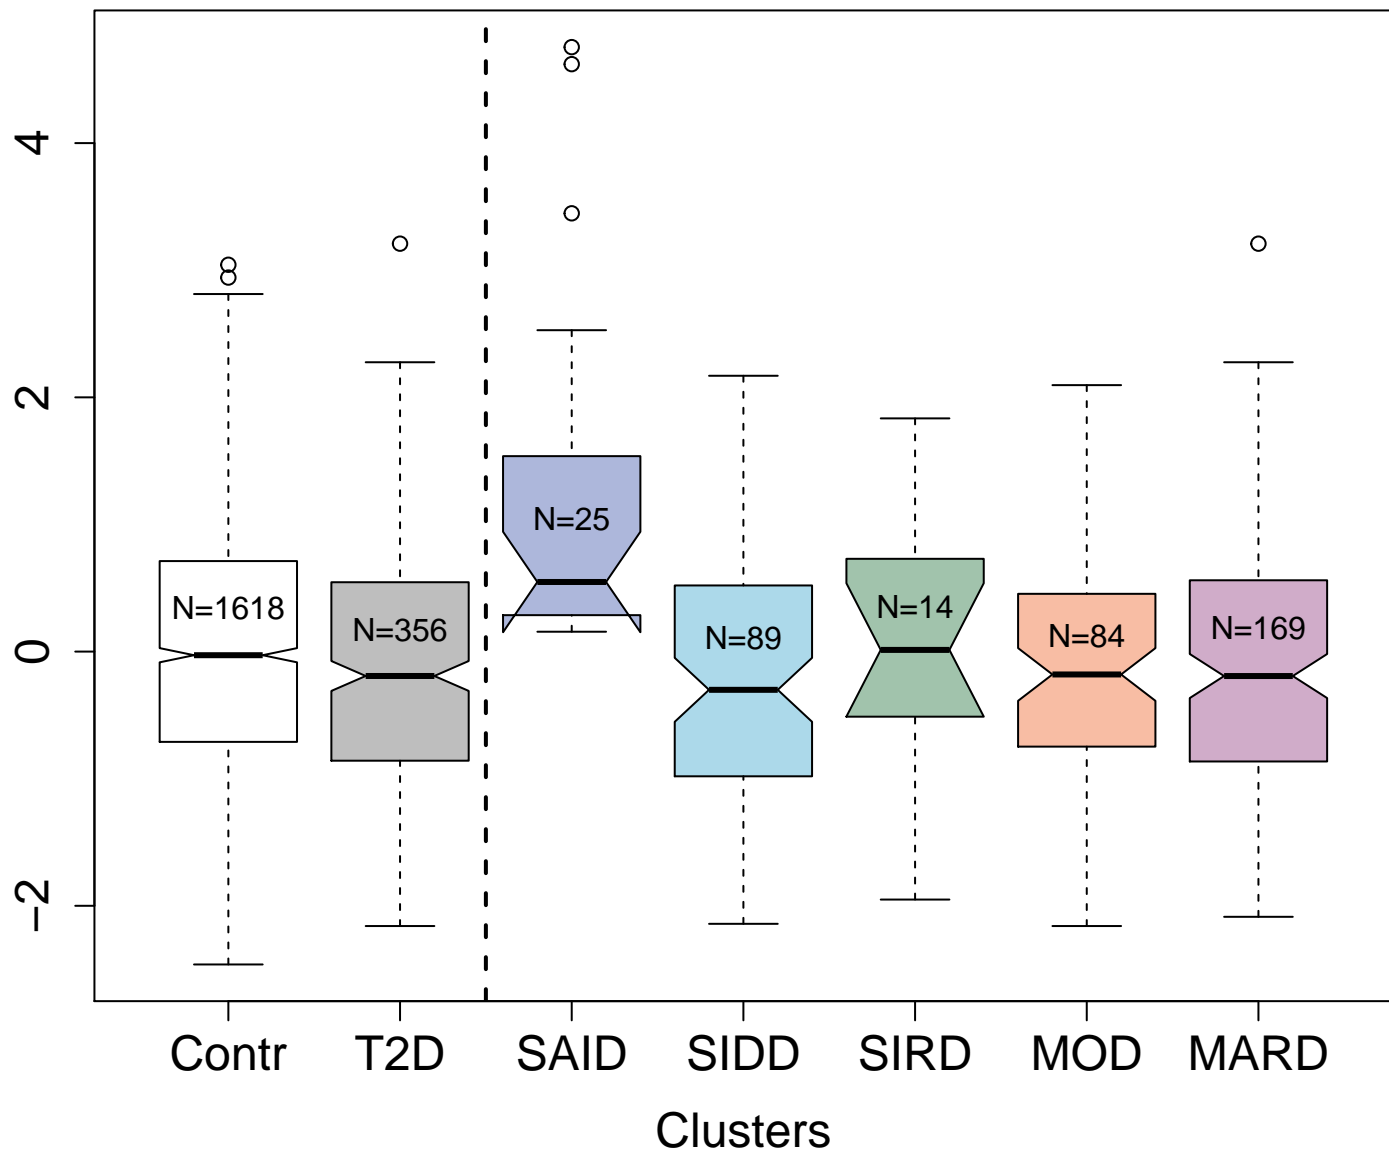

M57716 : X - 24949

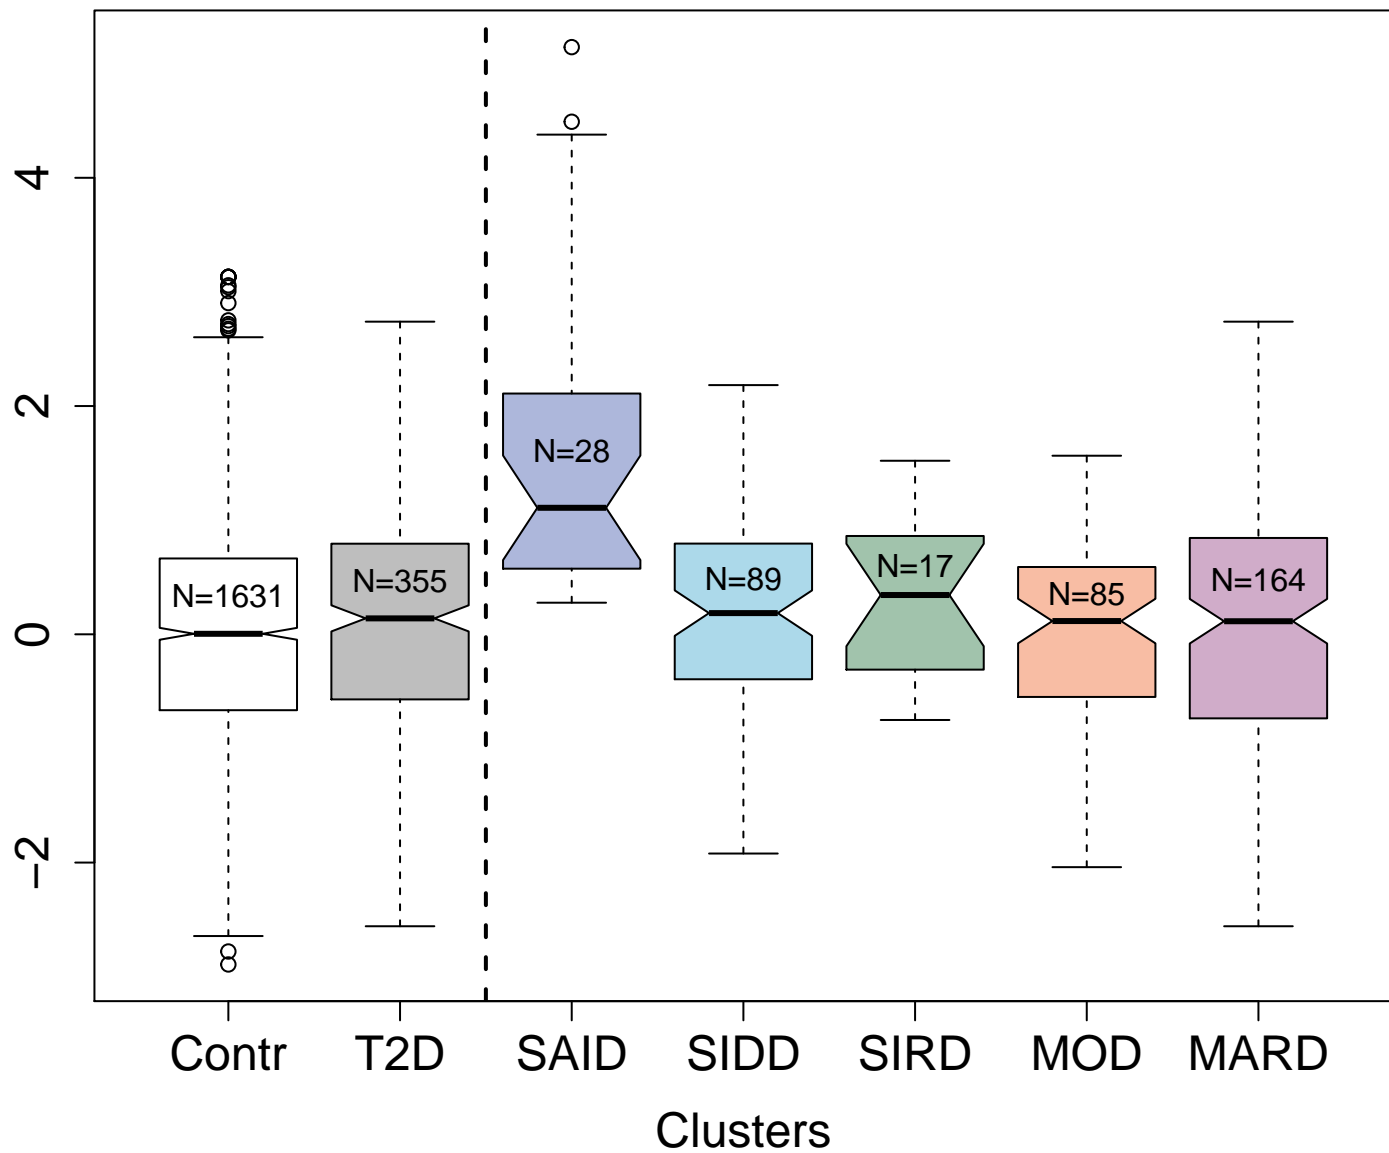

M47019 : X - 21842

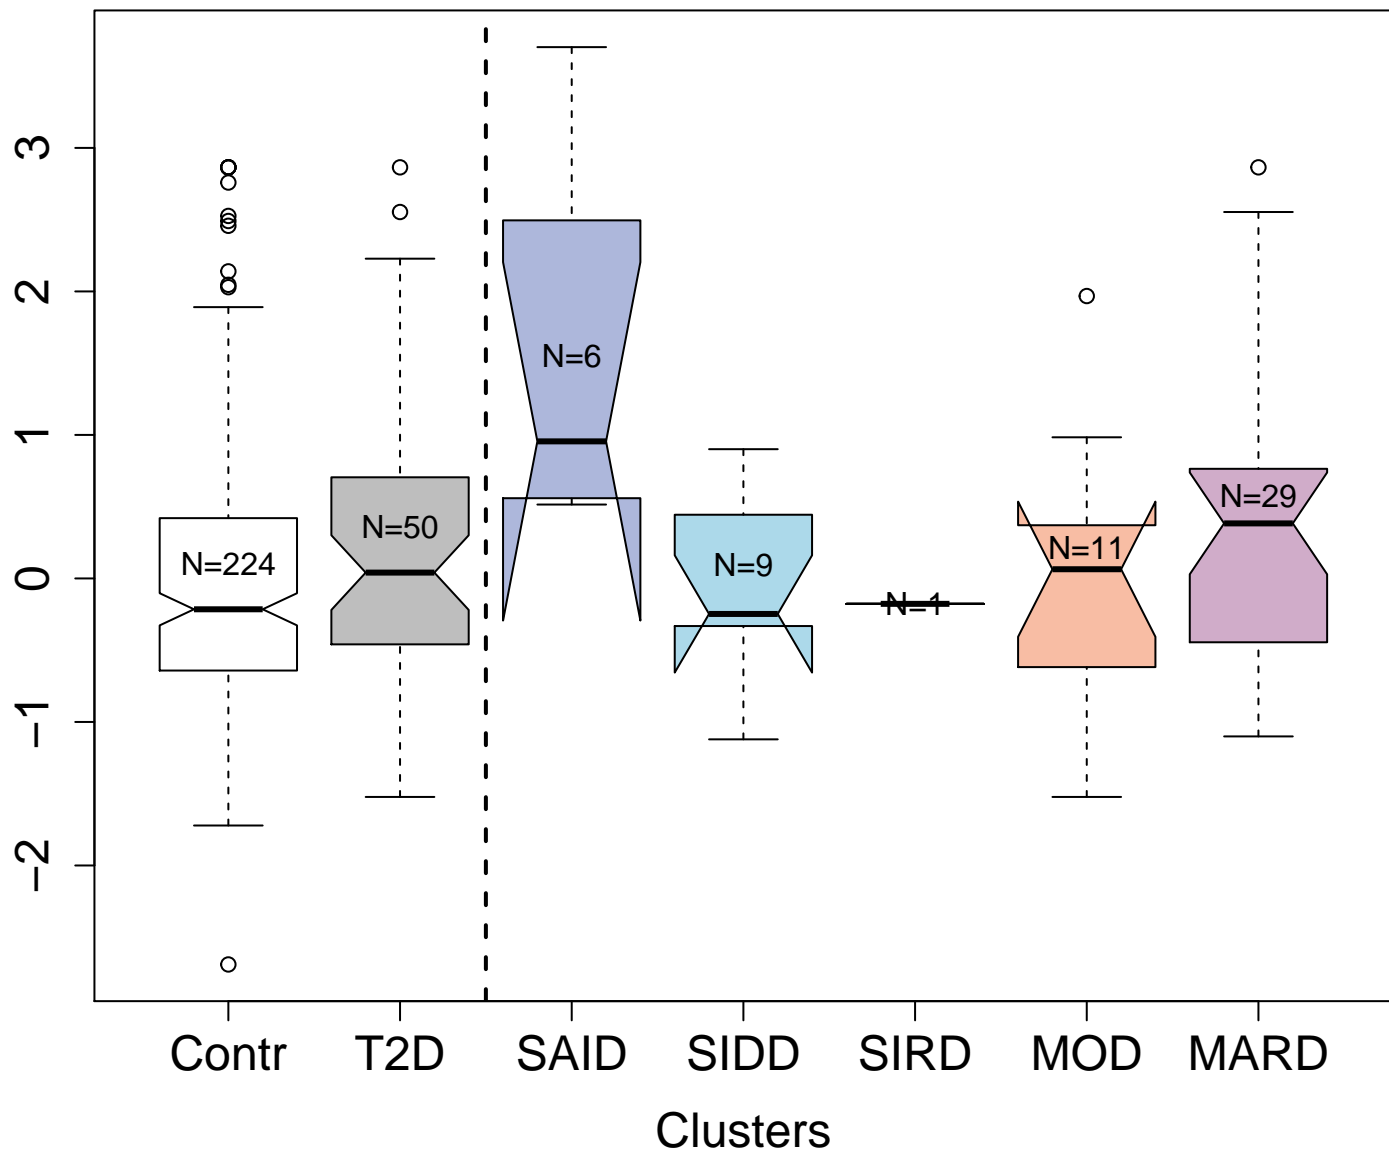

M32599 : glycocholenate sulfate\*

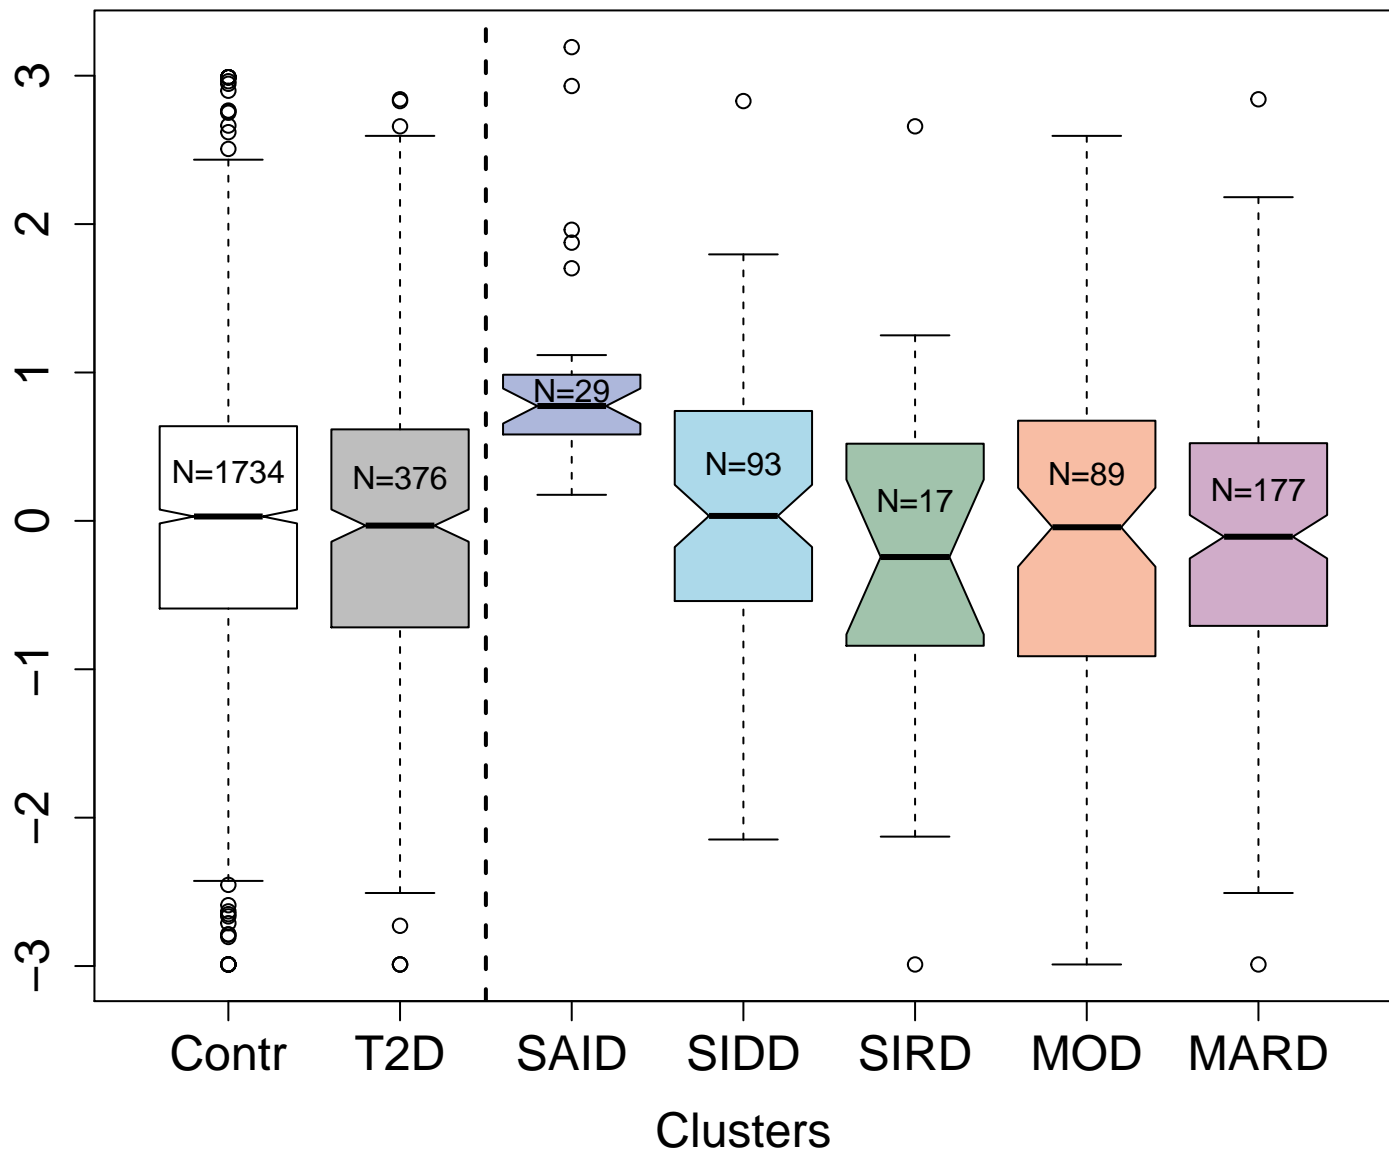

M37196 : 5alpha-pregnan-3beta,20beta-diol monosulfate (1)

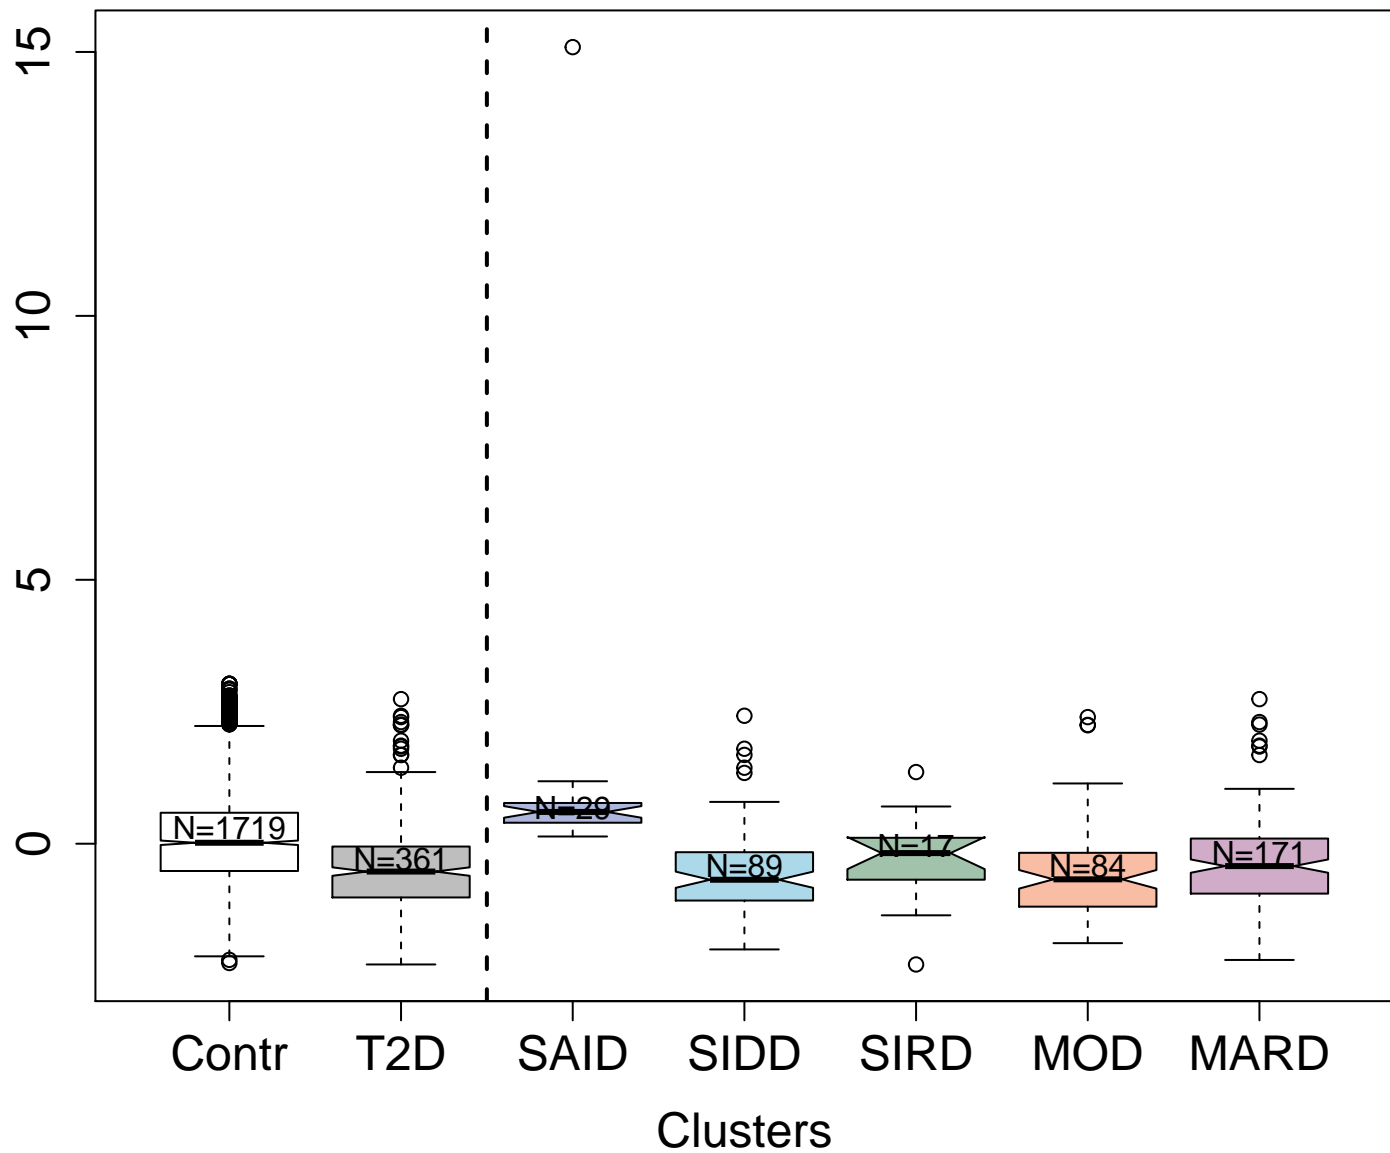

M46363 : X - 21319

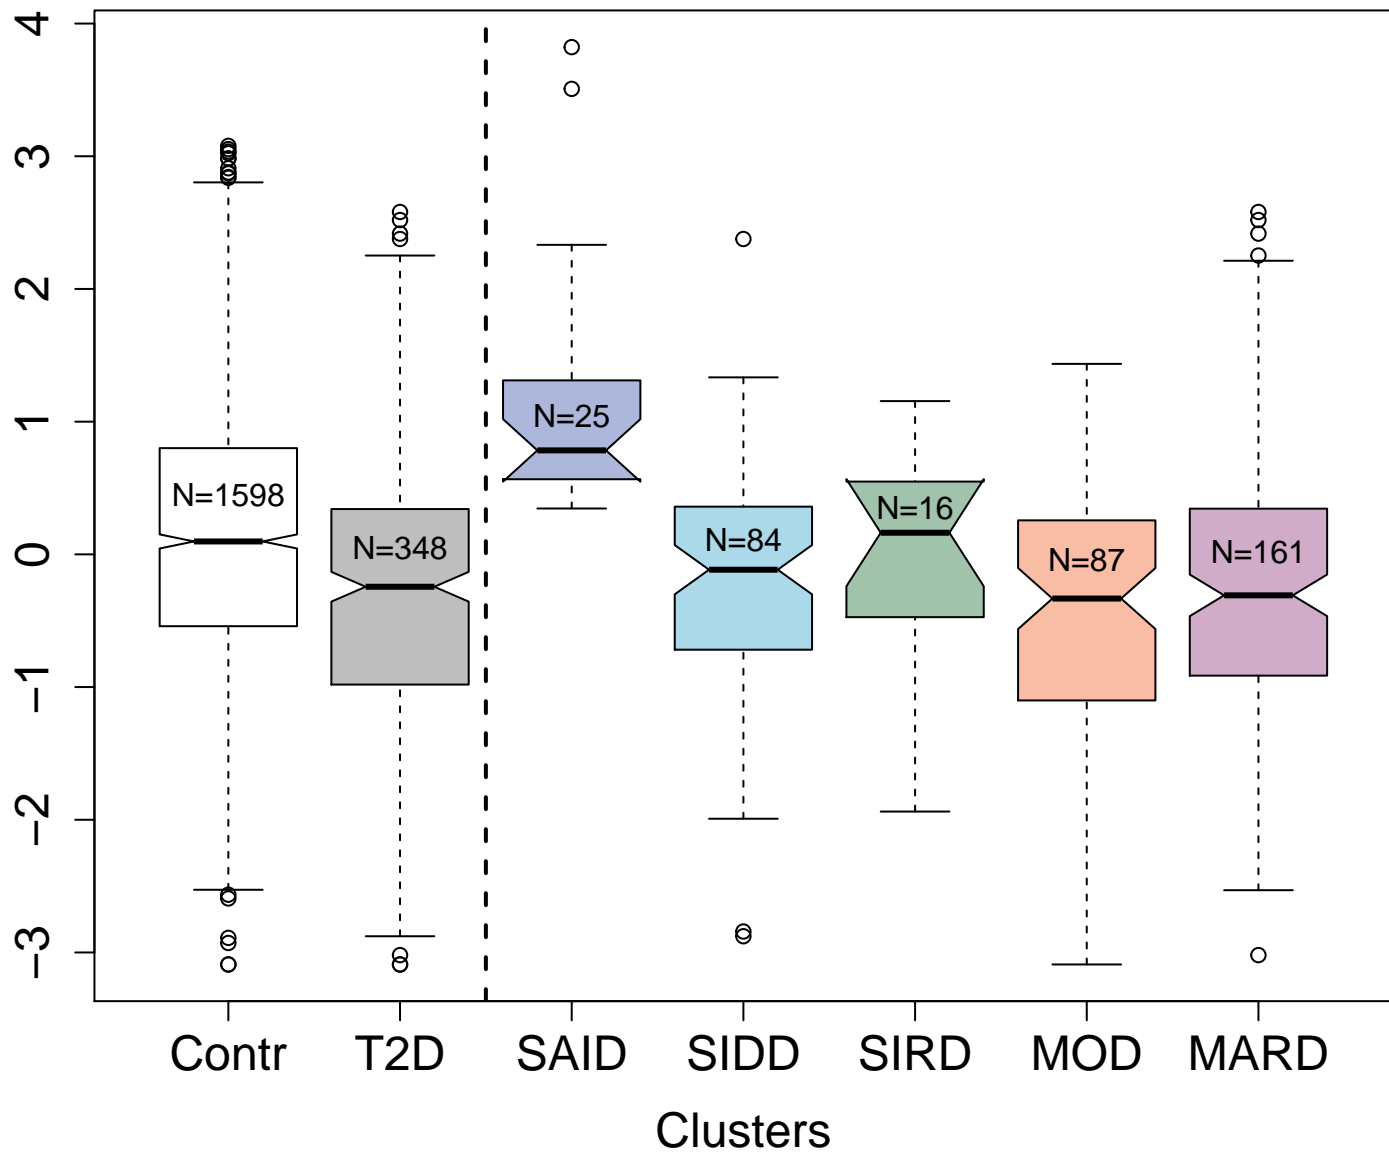

M48428 : pyrraline

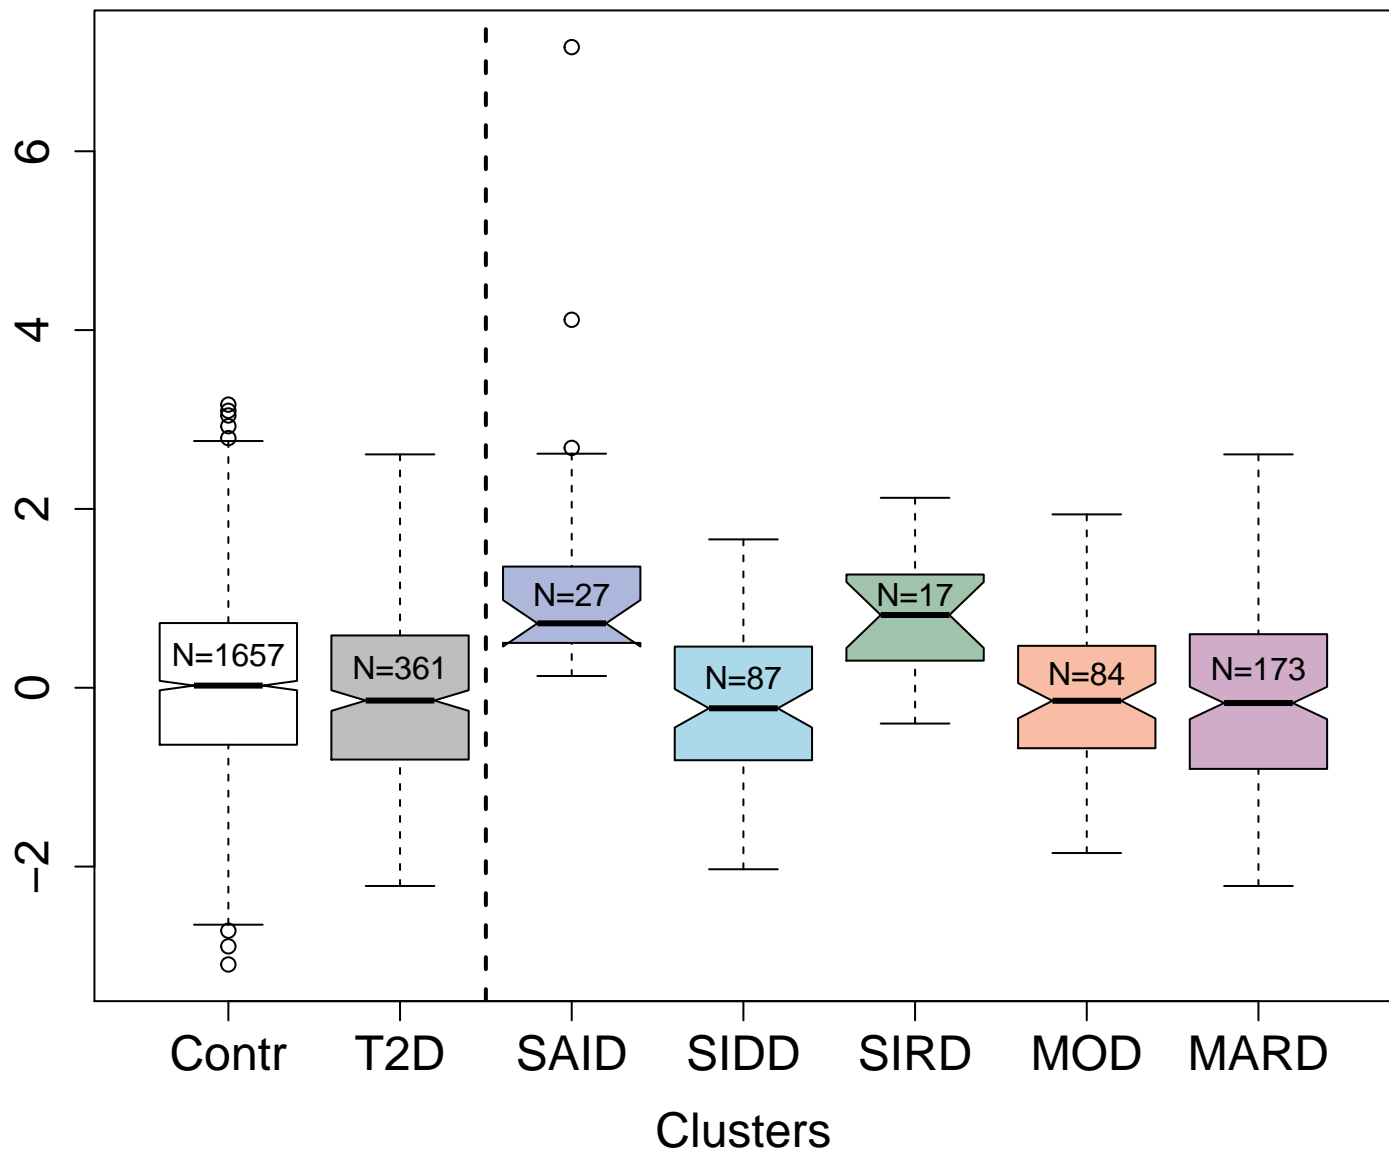



M36602 : 1-oleoyl-GPI (18:1)

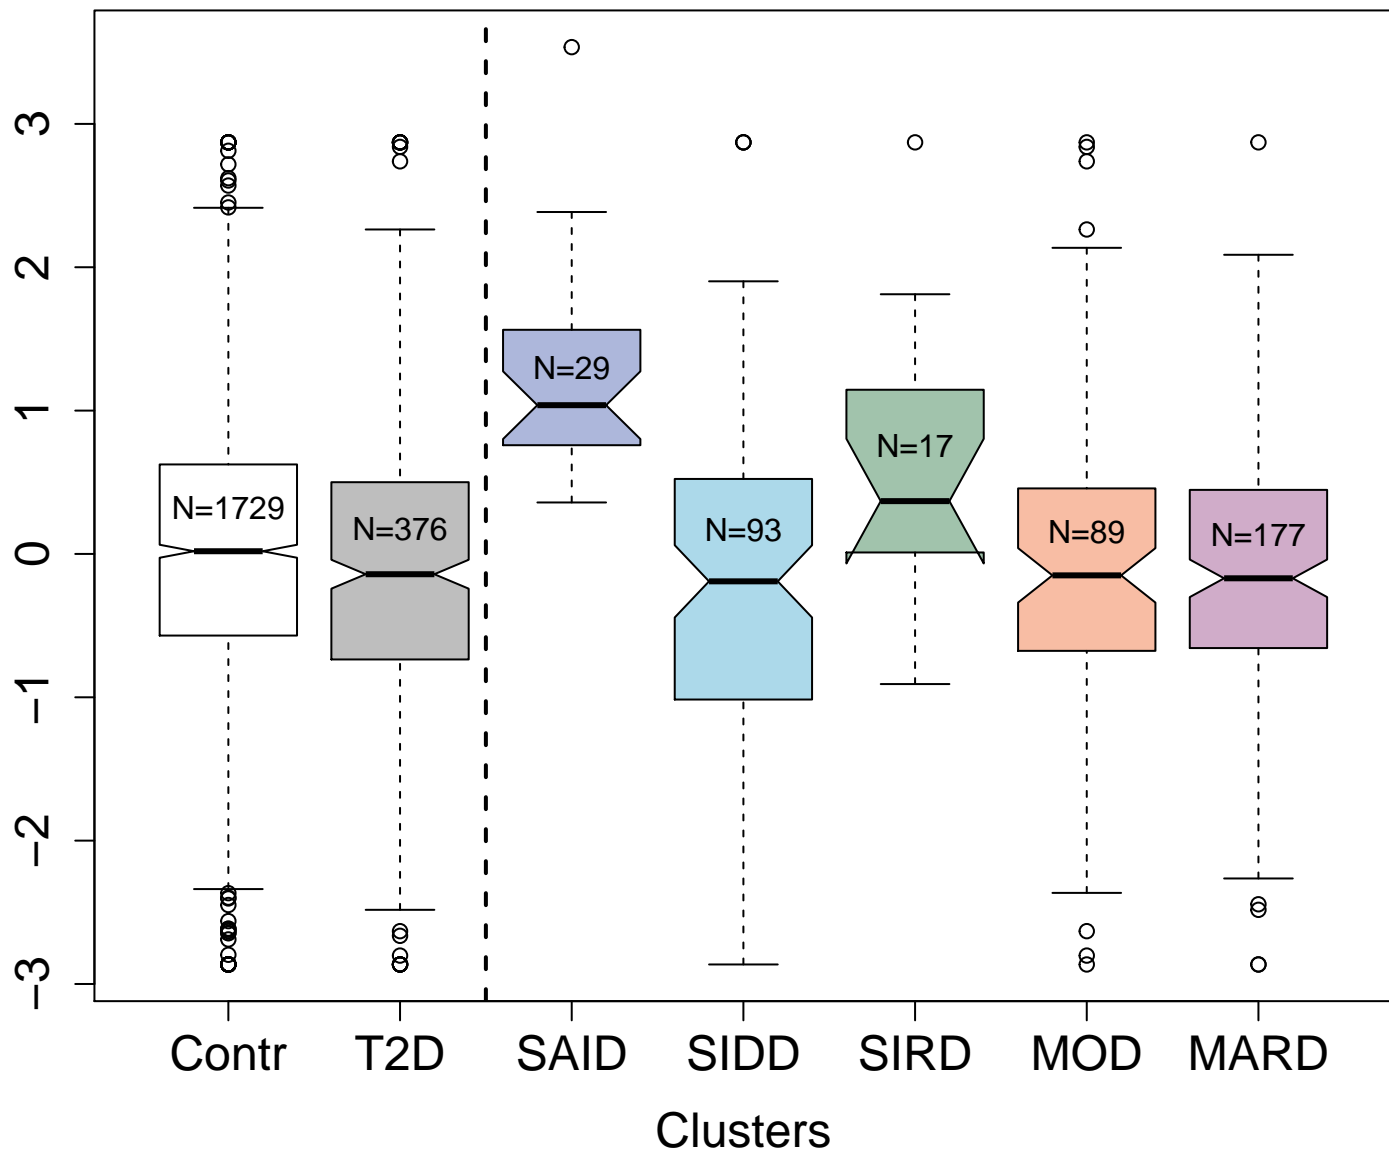

M46616 : X - 12411

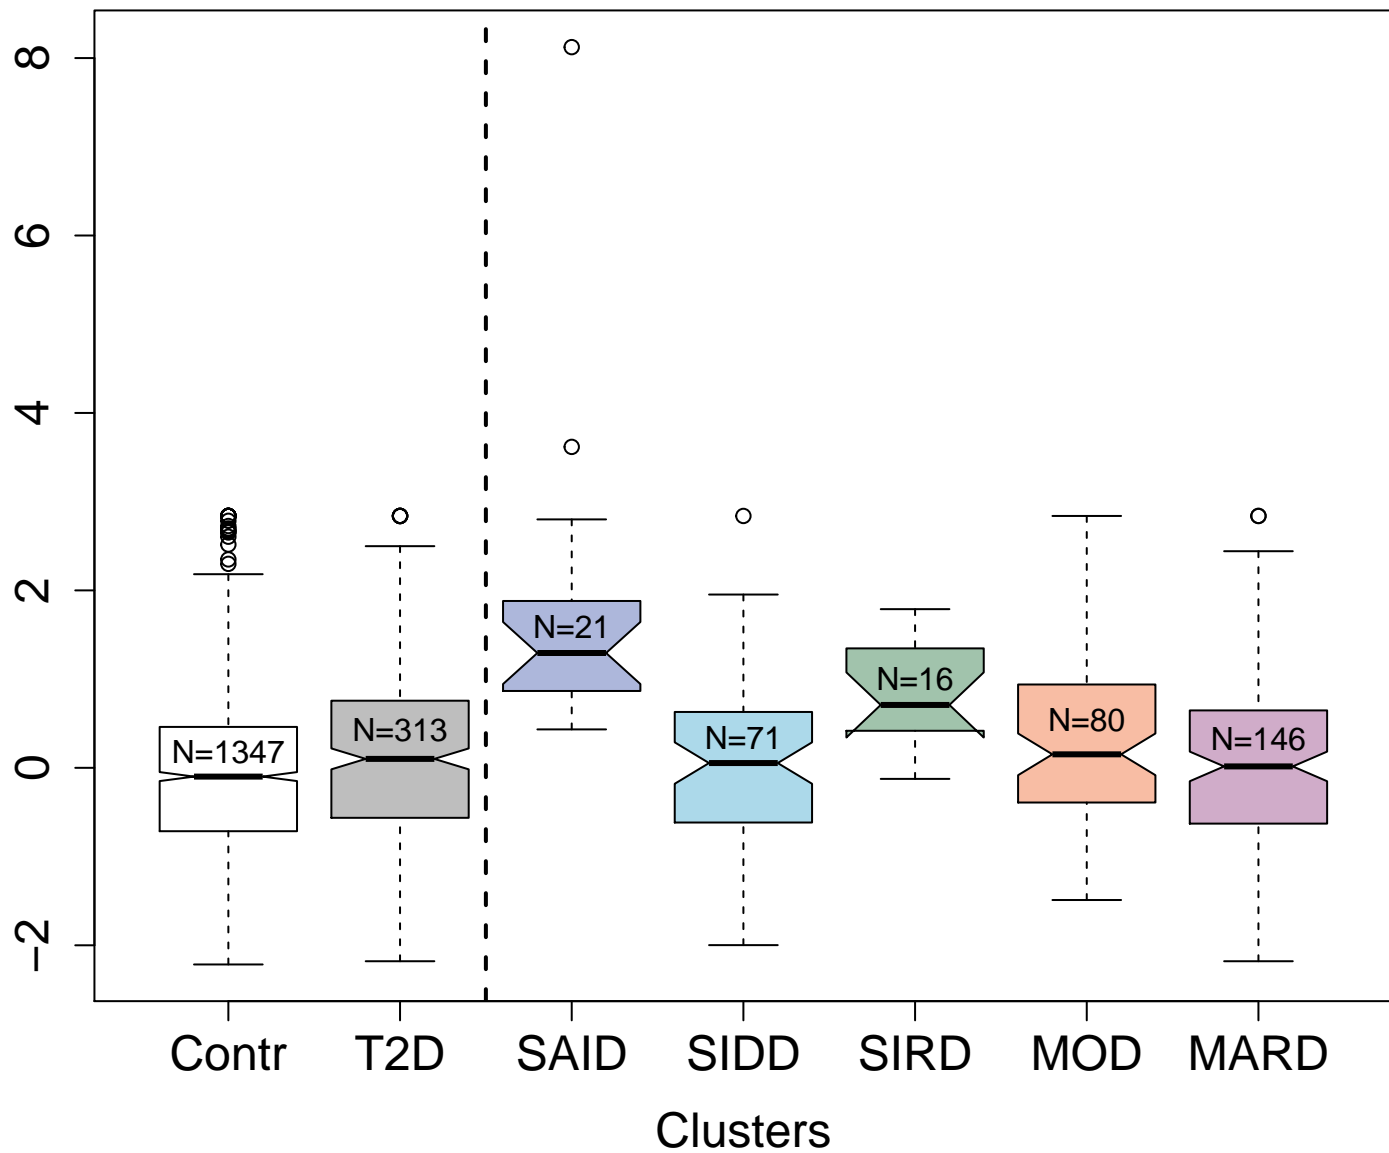

M42448 : 1-stearoyl-2-oleoyl-GPE (18:0/18:1)

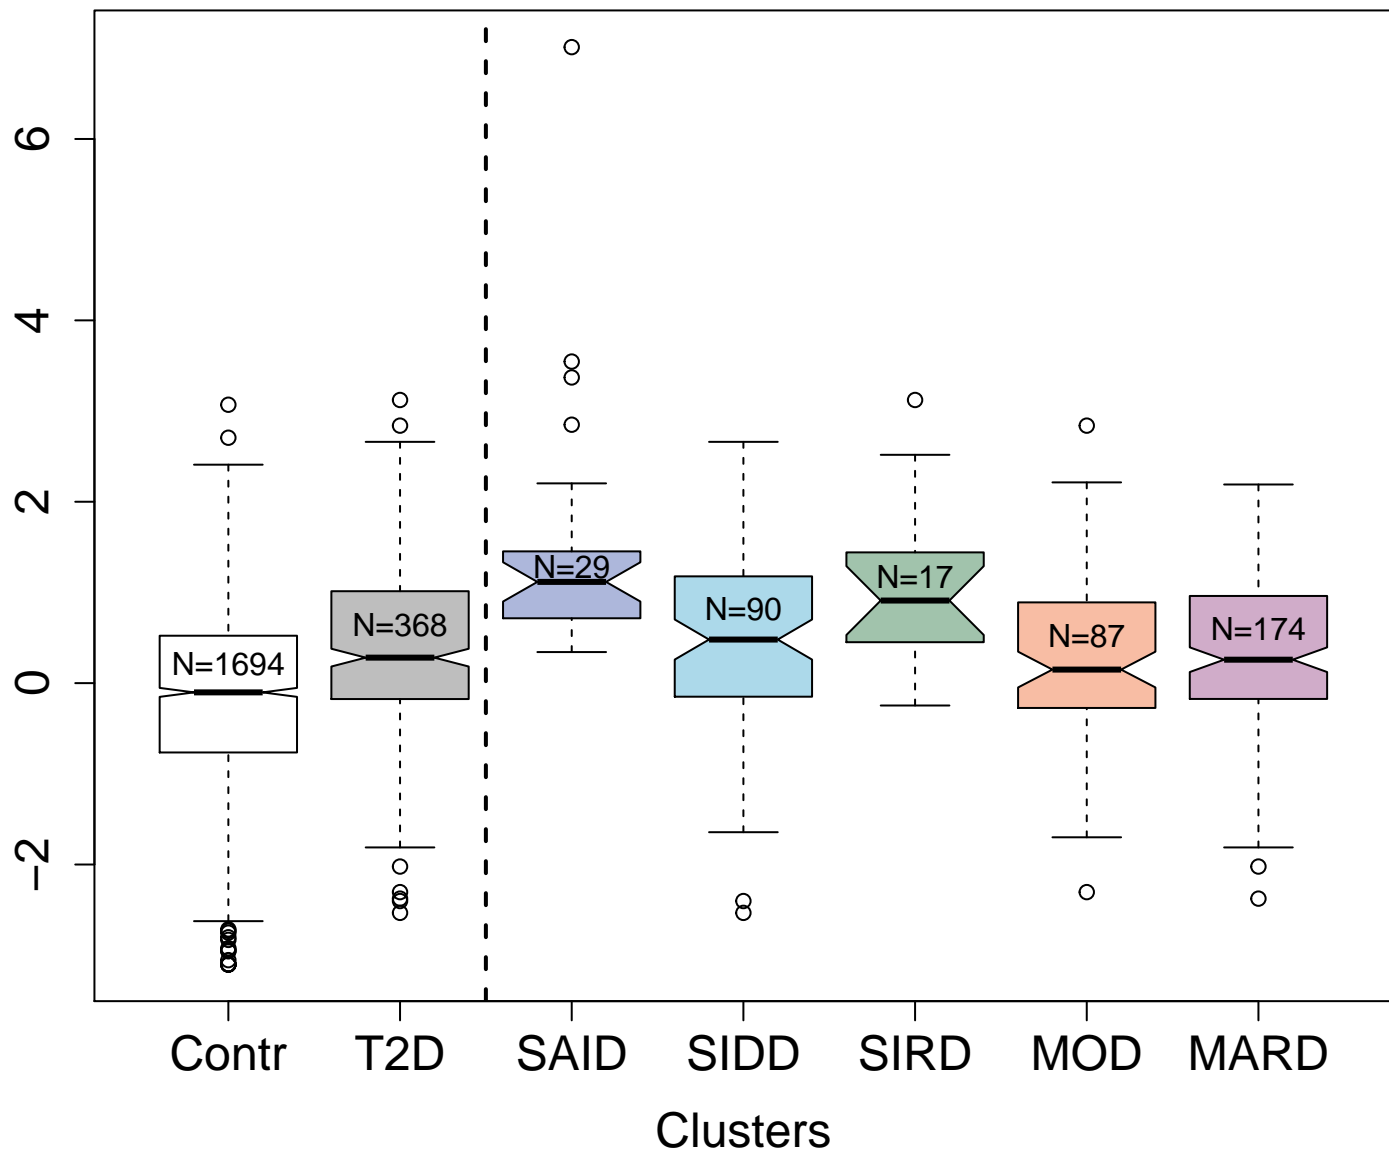

M1605 : ursodeoxycholate

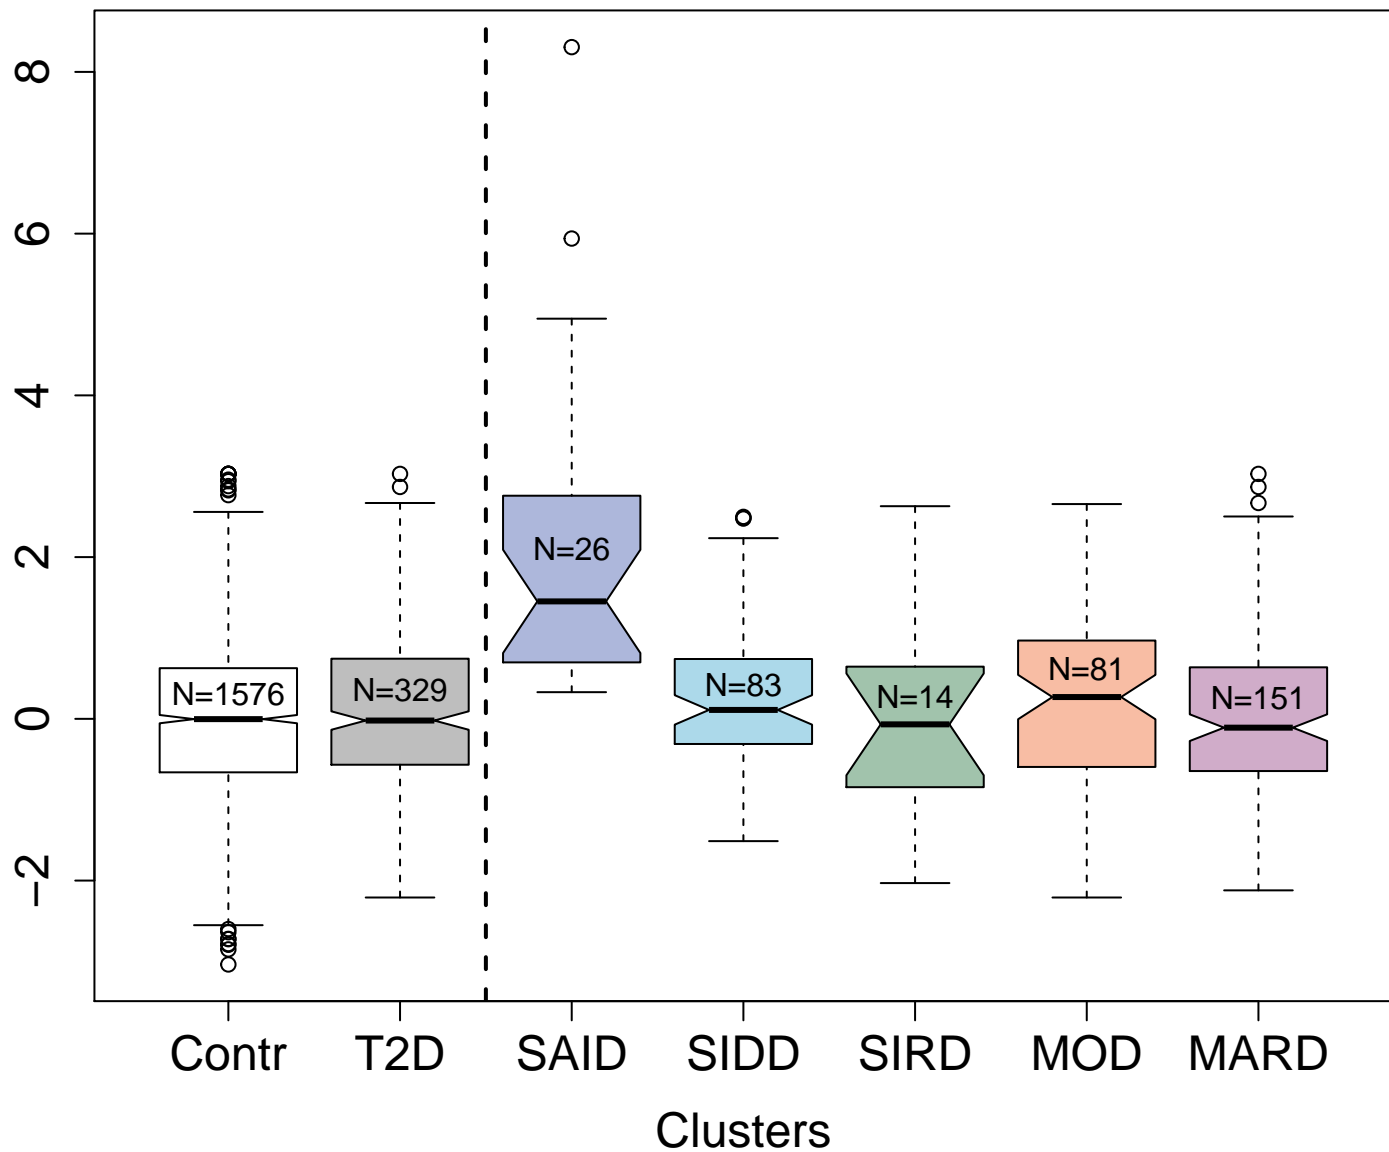

M43591 : N2,N5-diacetylornithine

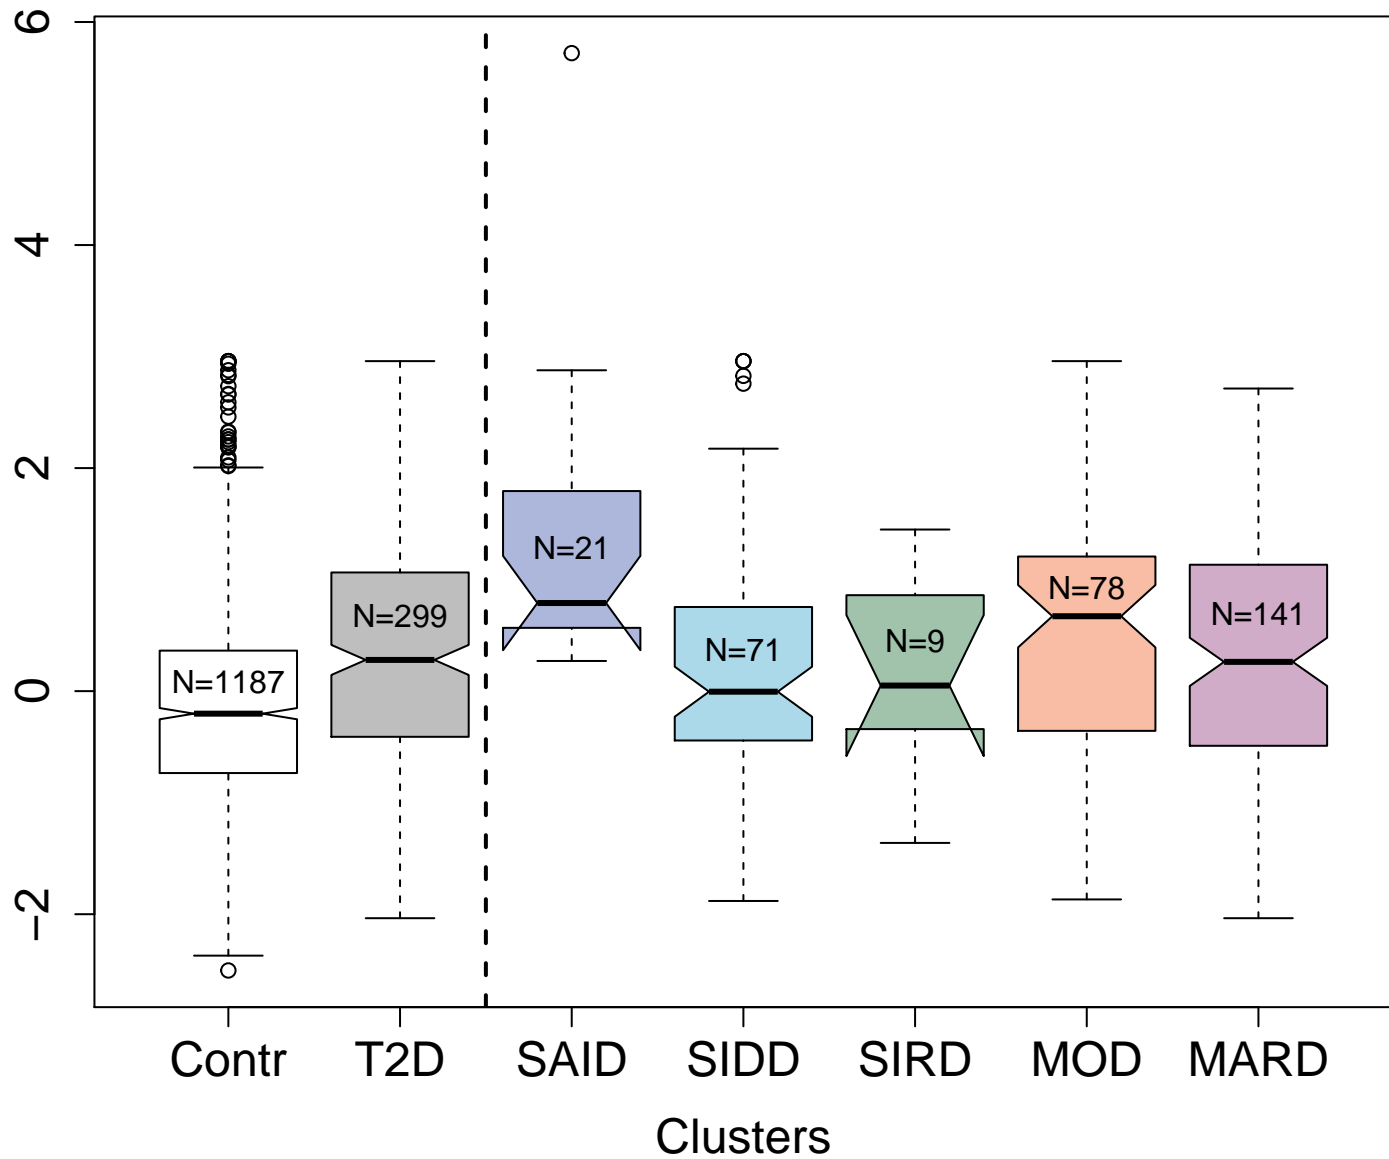

M18335 : quinate

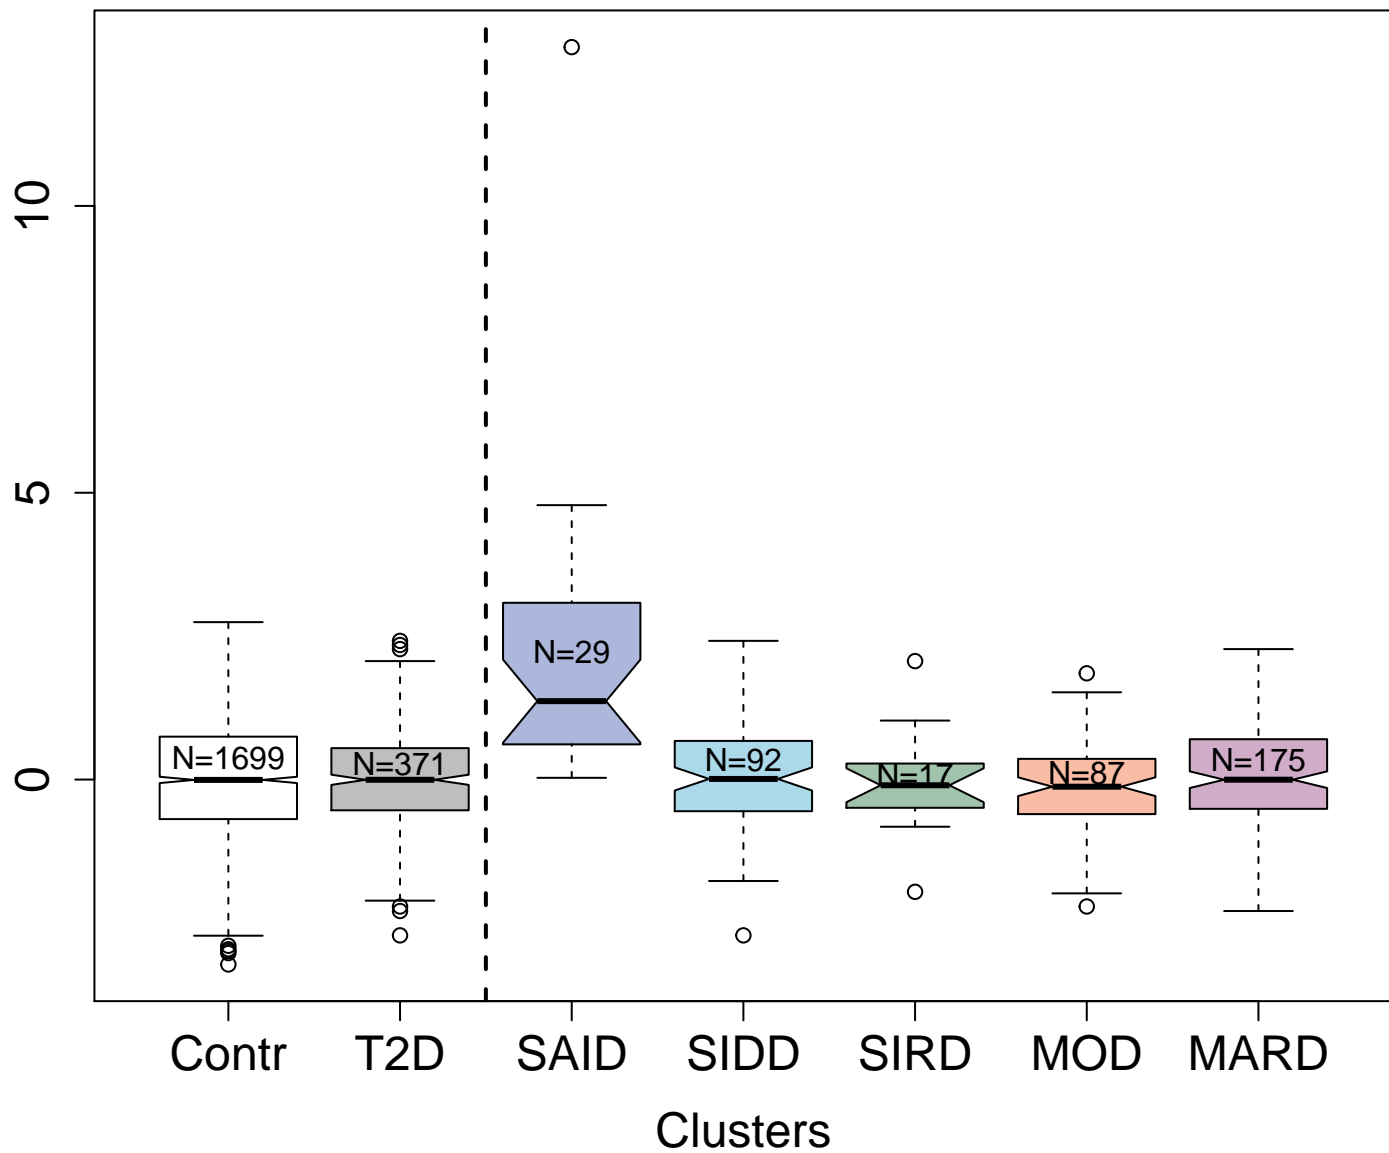

M47784 : X - 22520

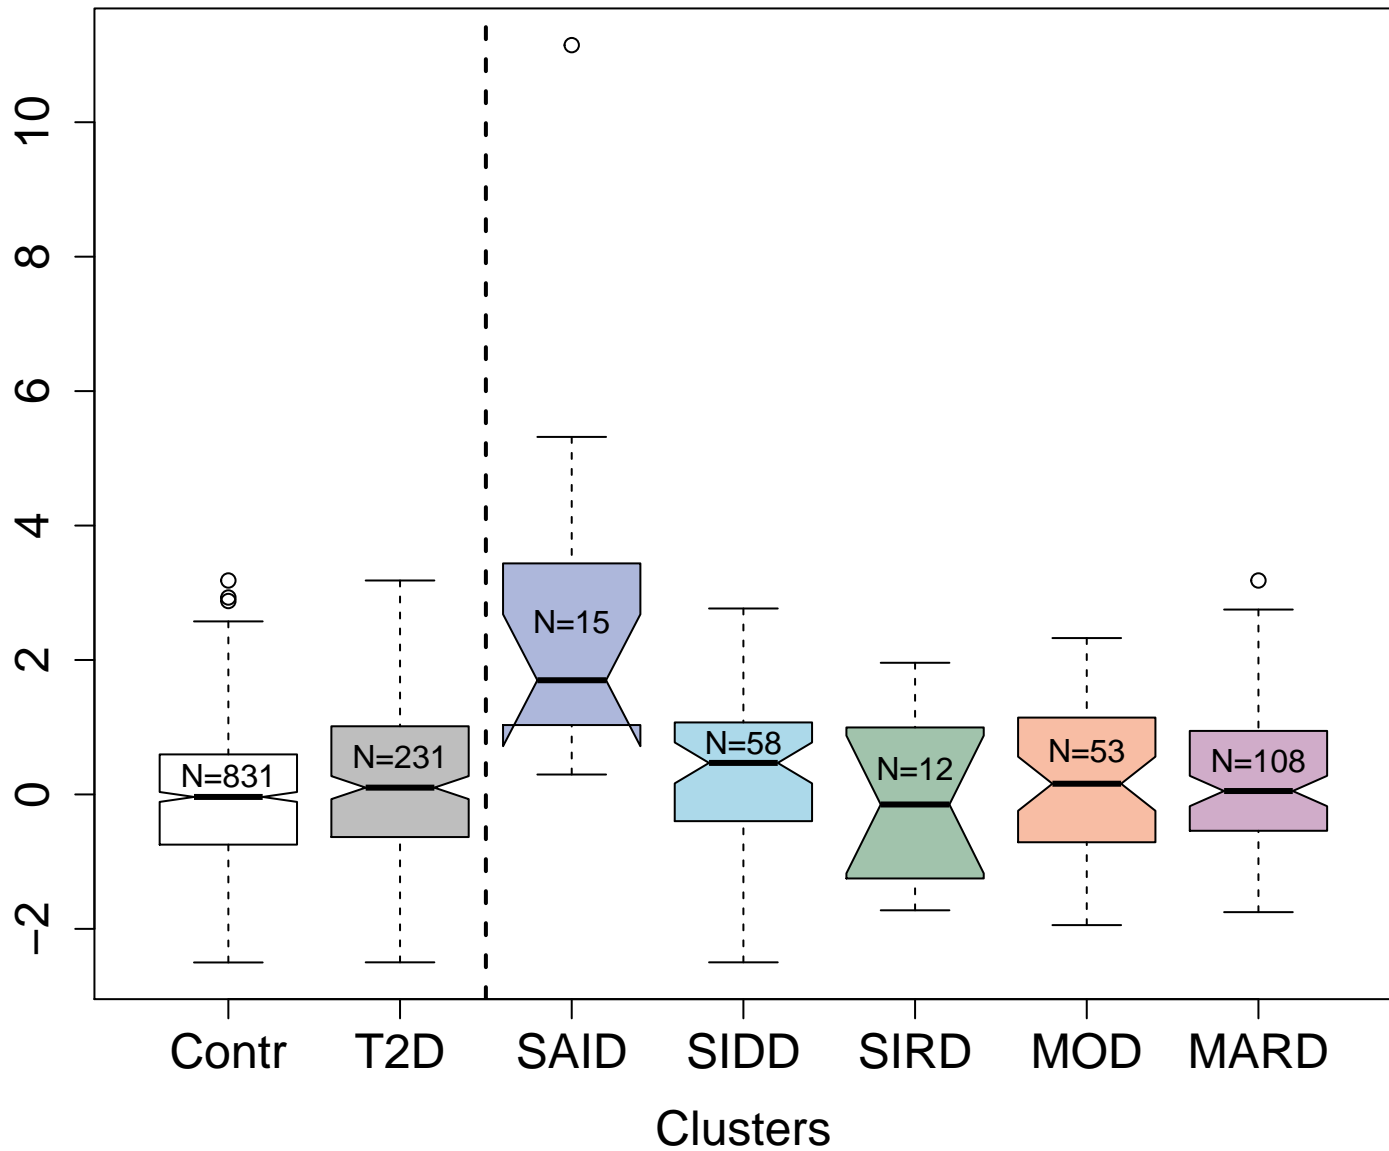

M62059 : N-acetyl-2-aminooctanoate\*

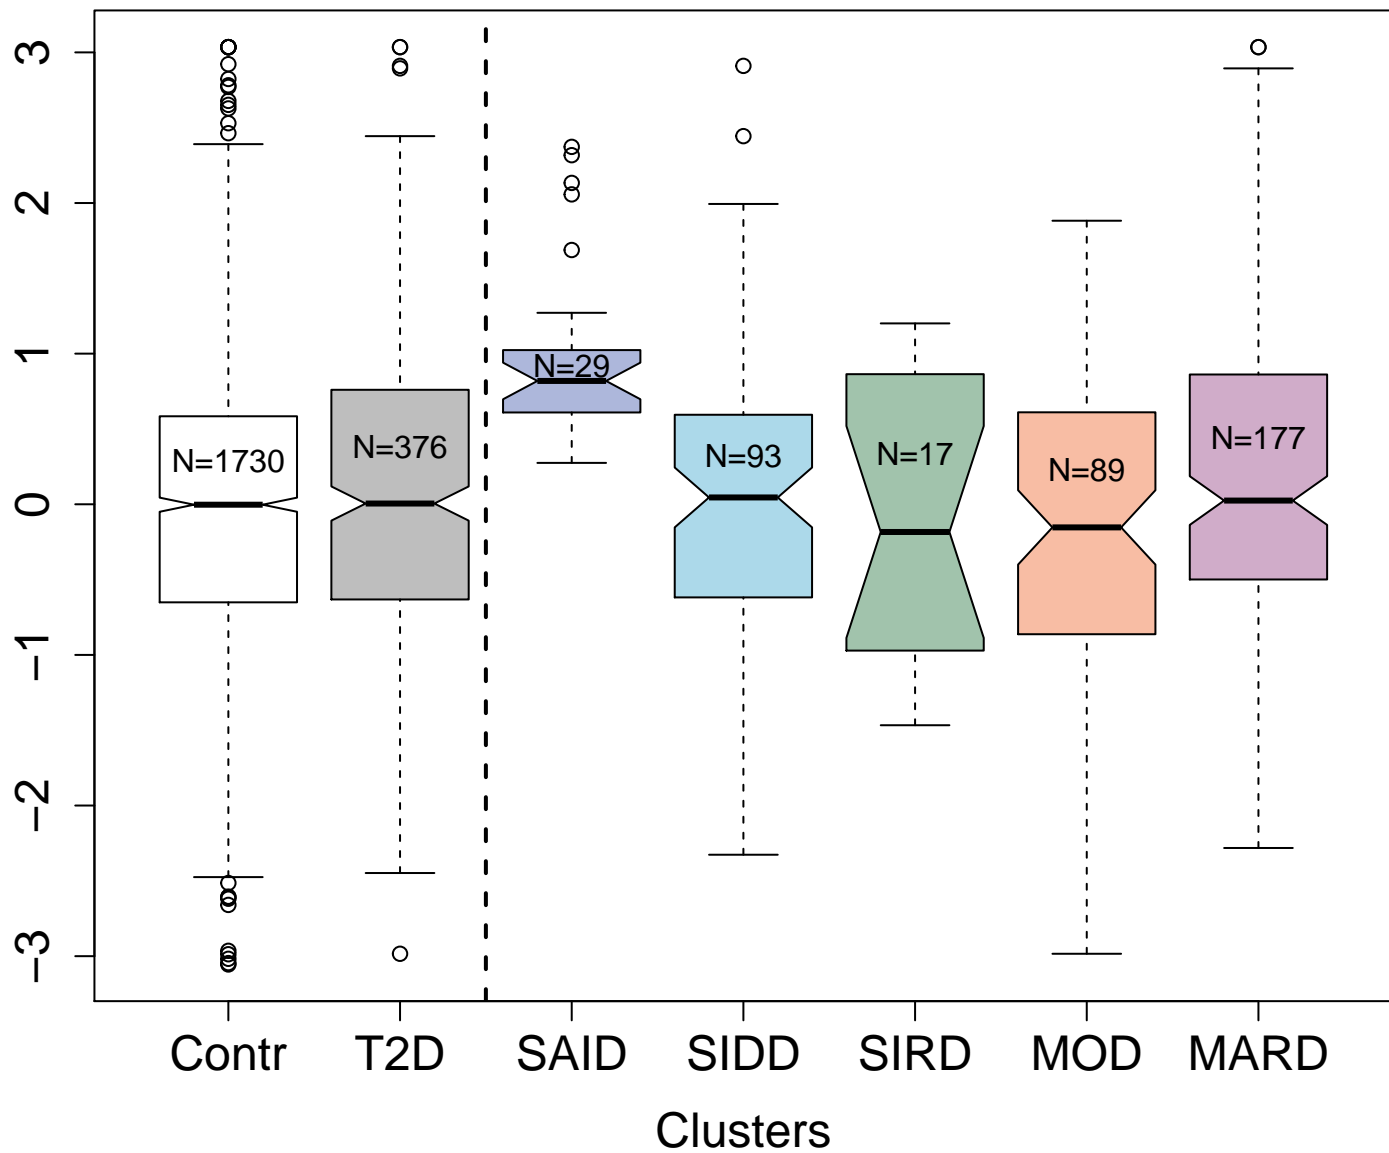



M62571 : cholic acid glucuronide

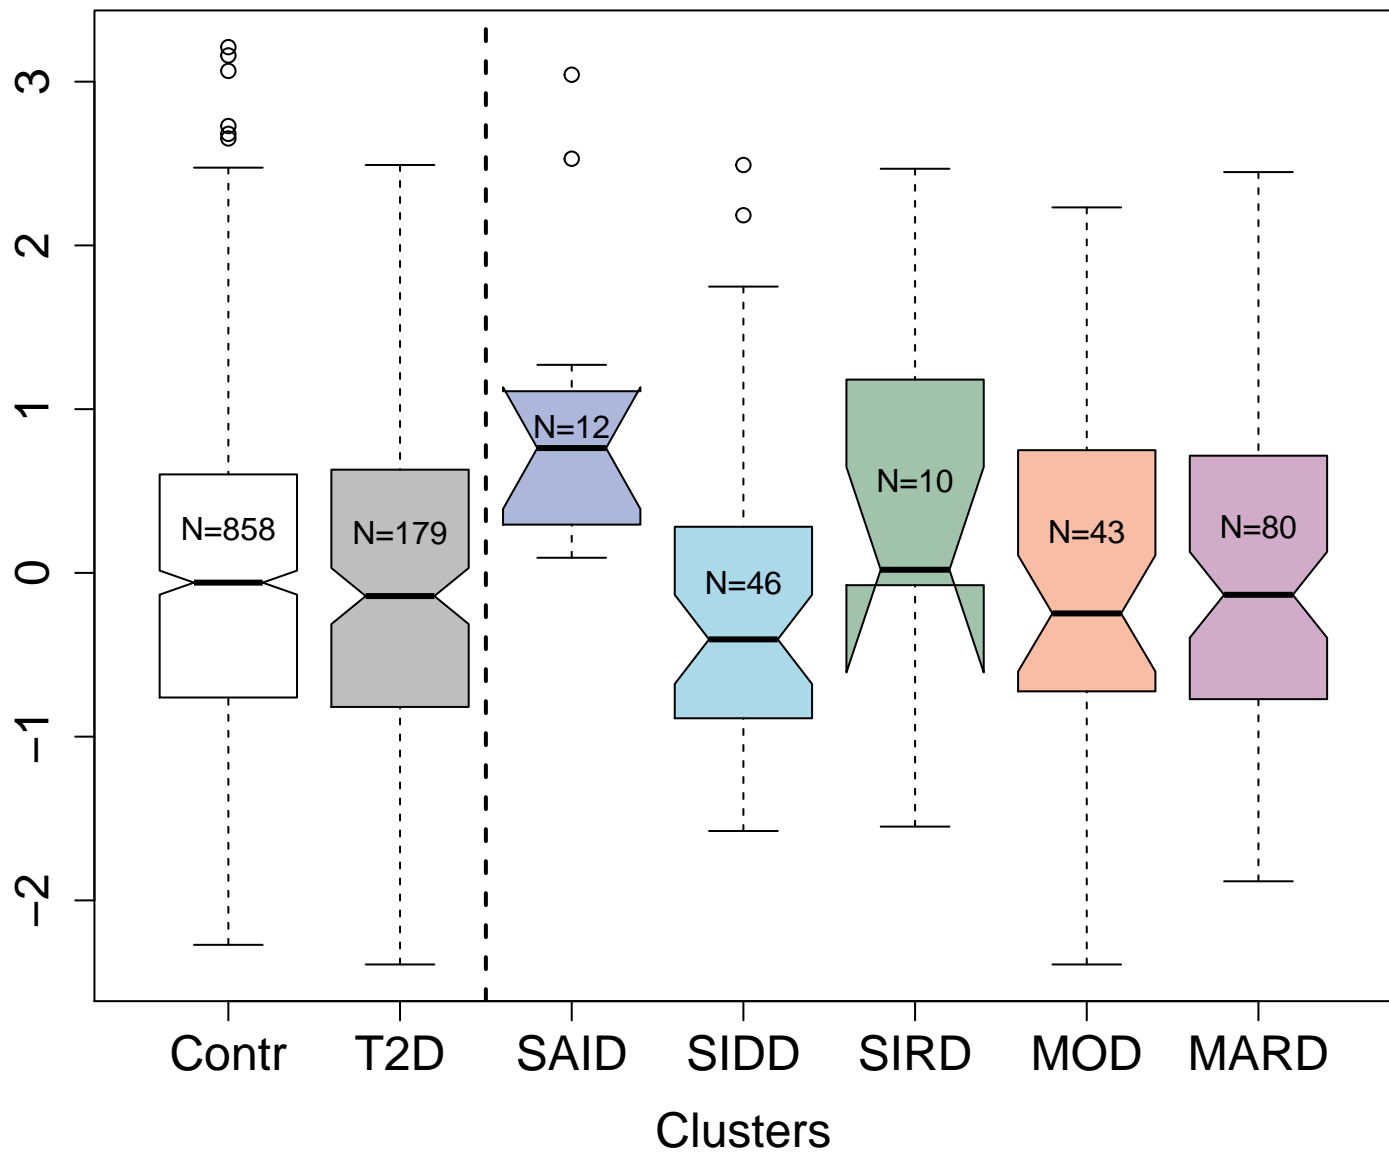

M63699 : GlcNAc sulfate conjugate of C21H34O2 steroid\*\*

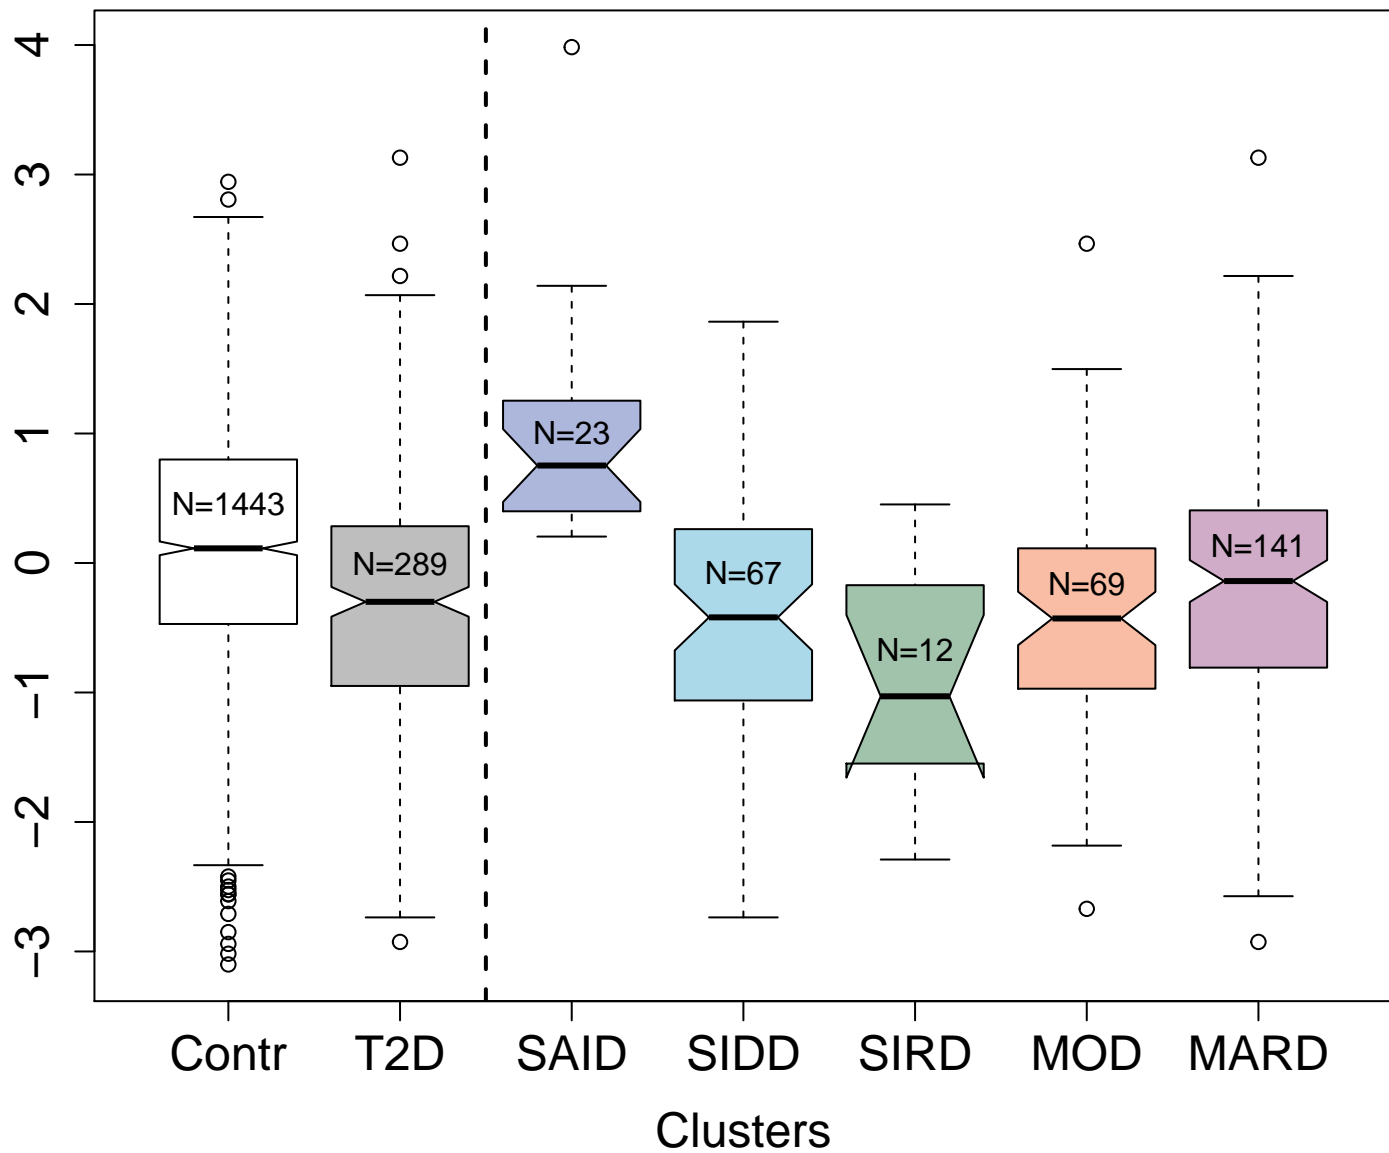

M20676 : maleate

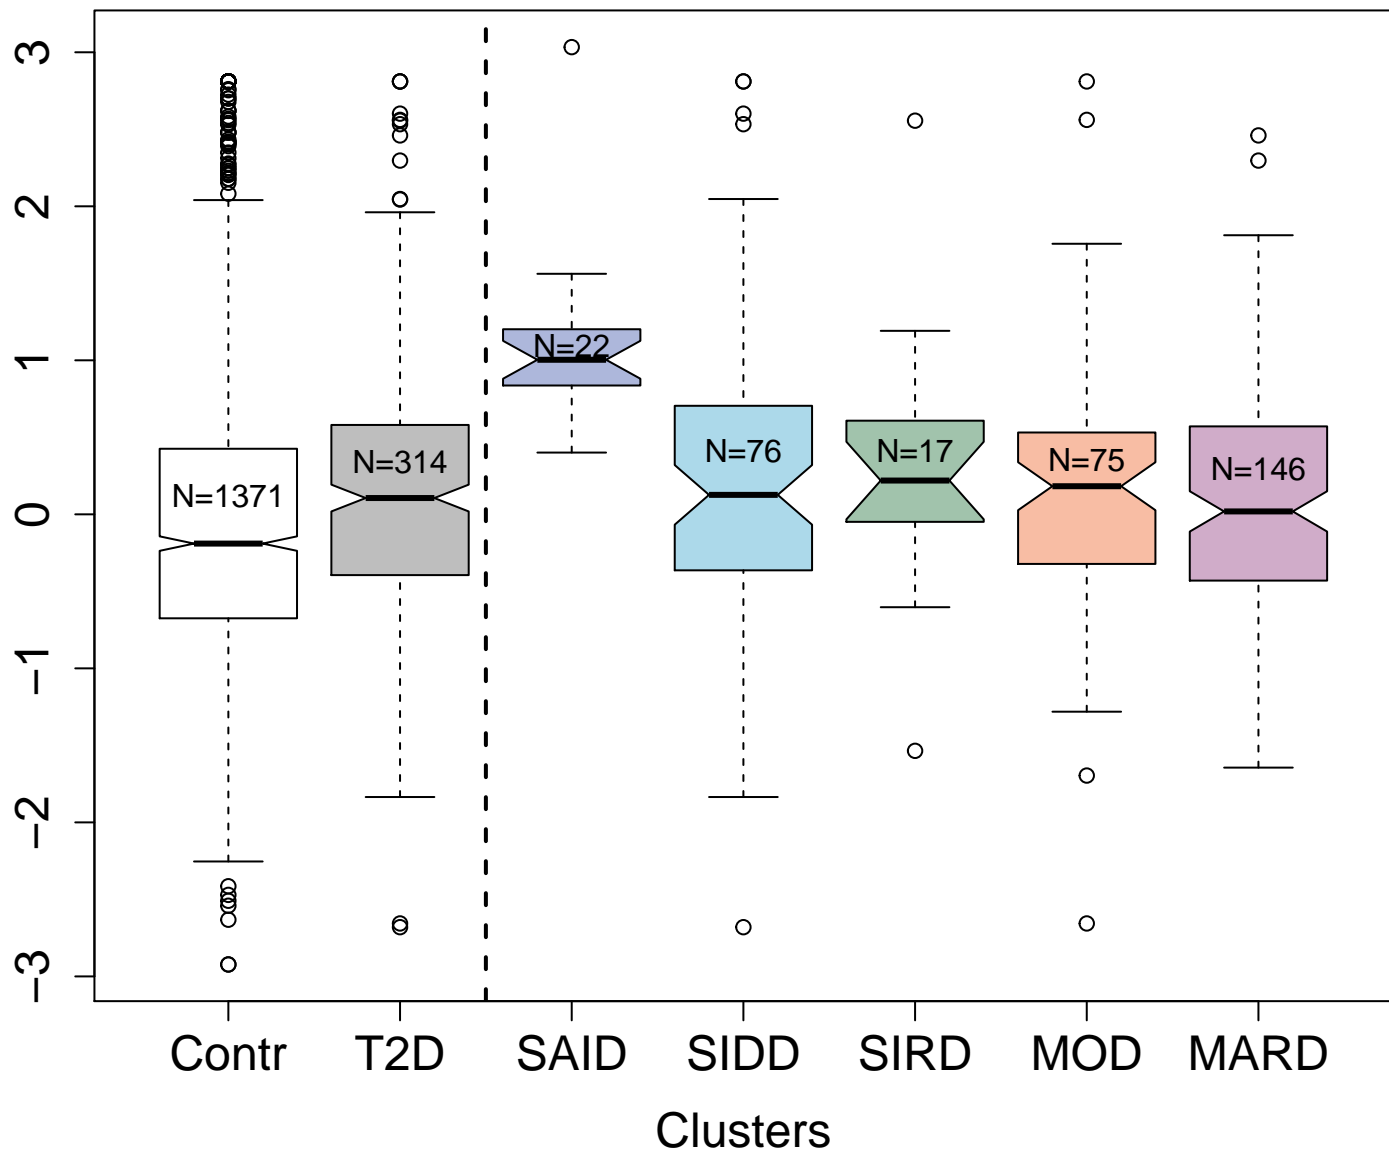

M42087 : indoleacetylglutamine

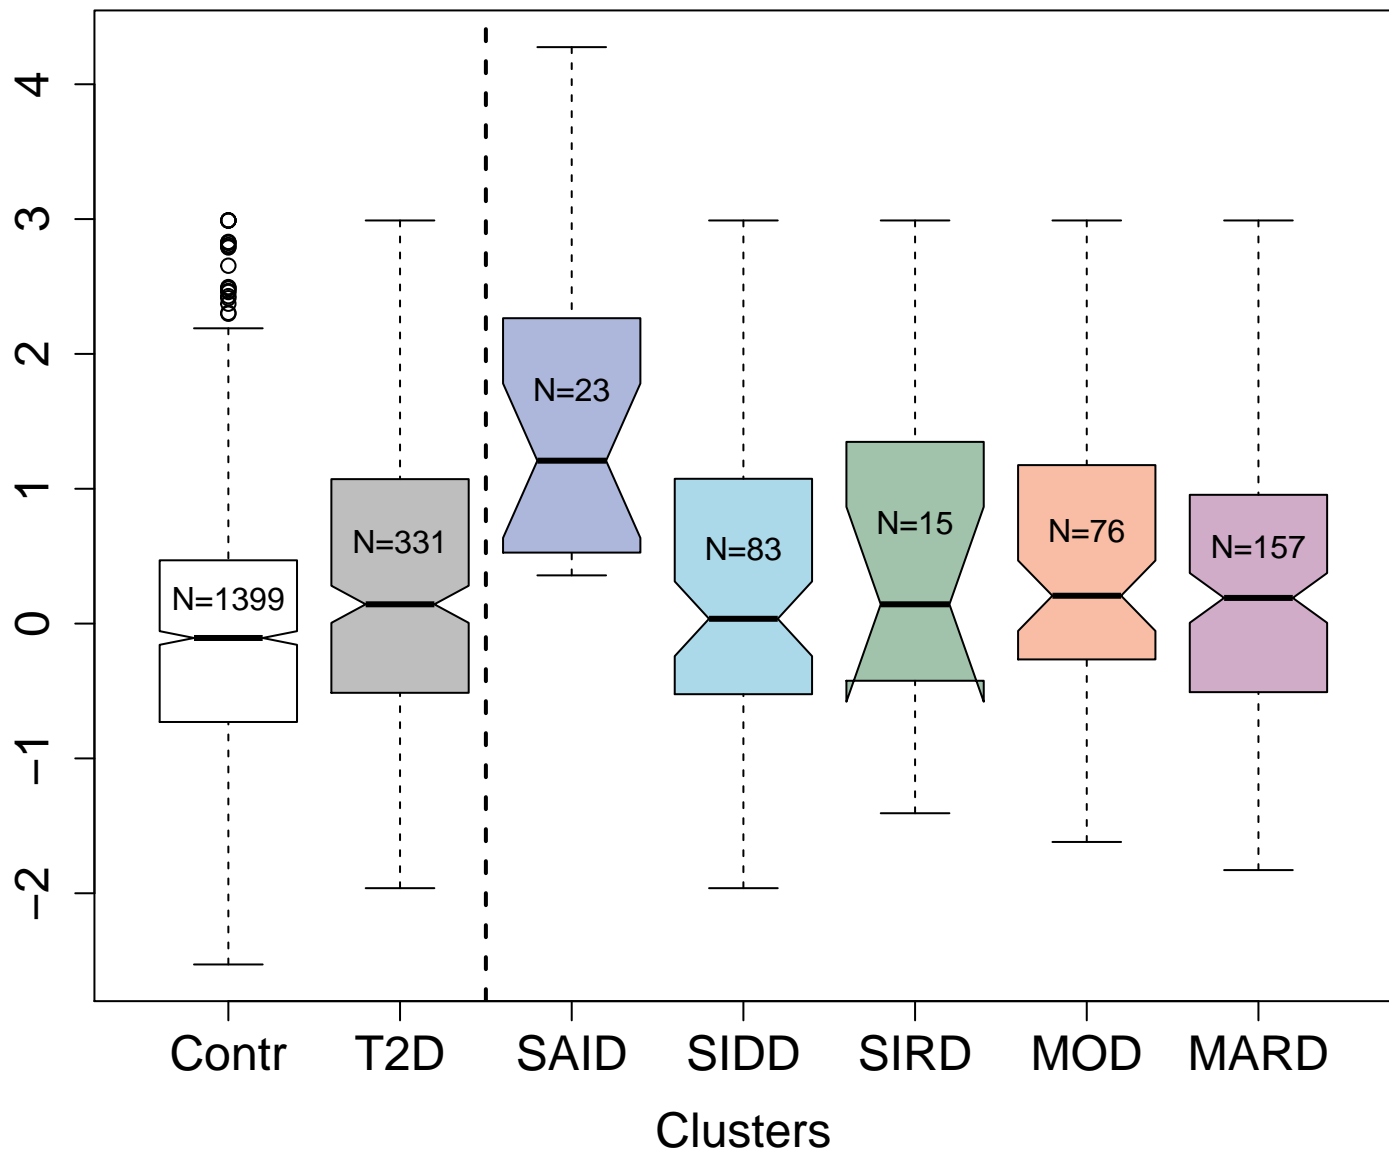

M33161 : 2-methoxyacetaminophen glucuronide\*

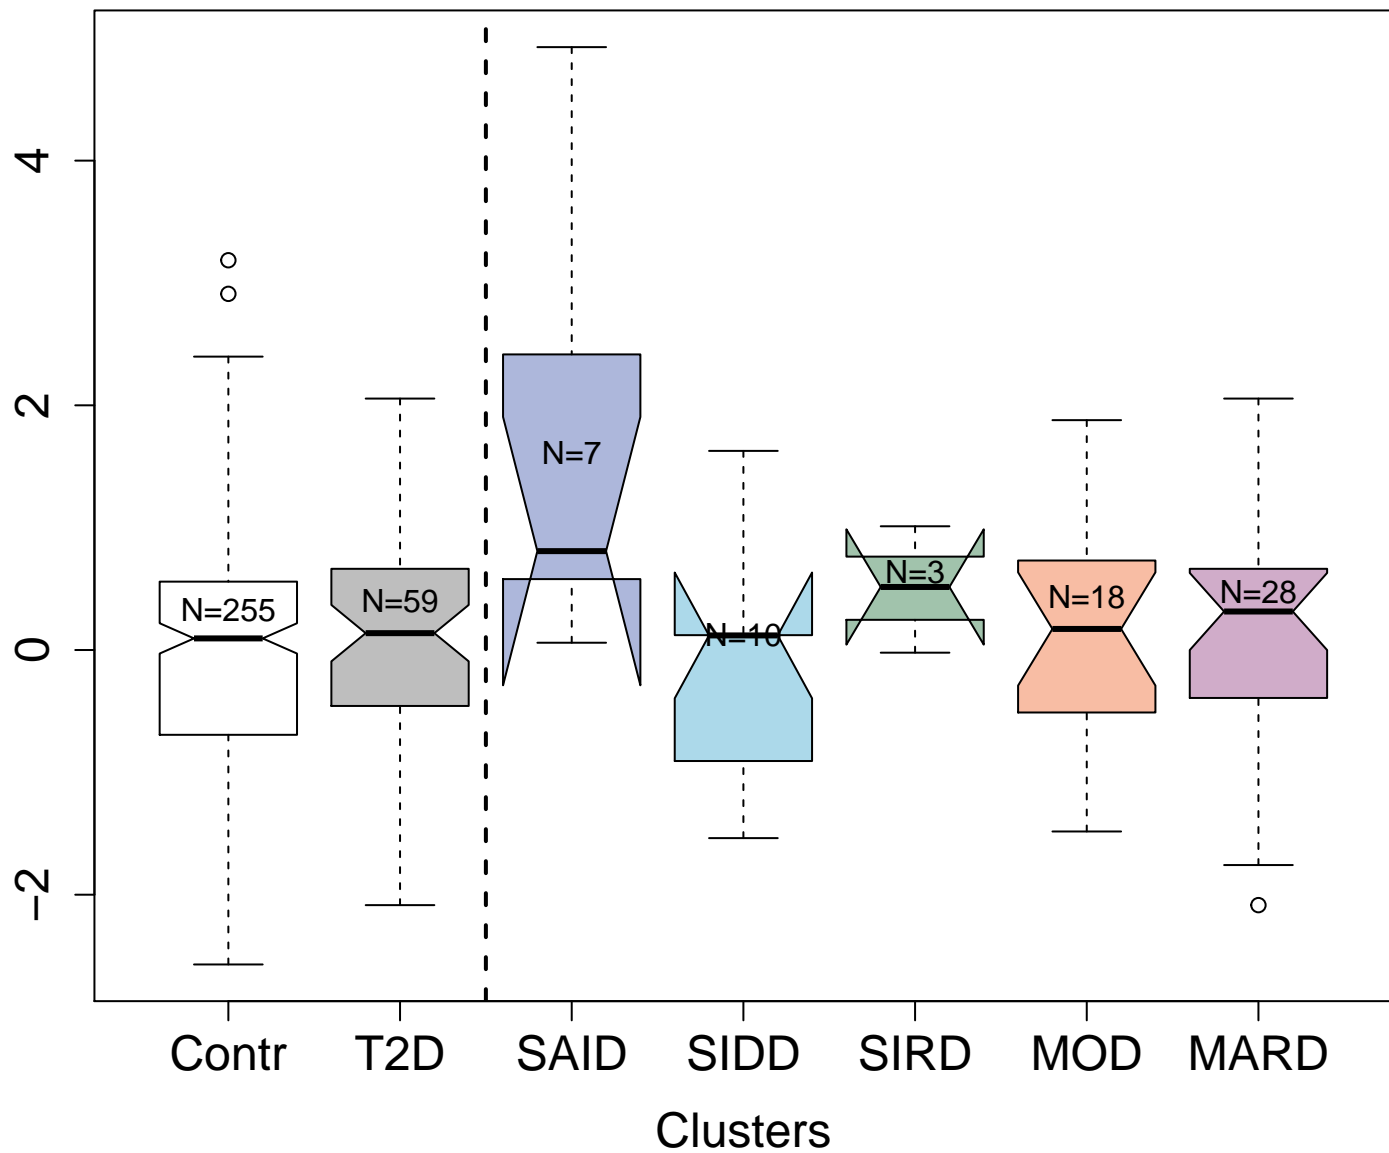

M57637 : carotene diol (3)

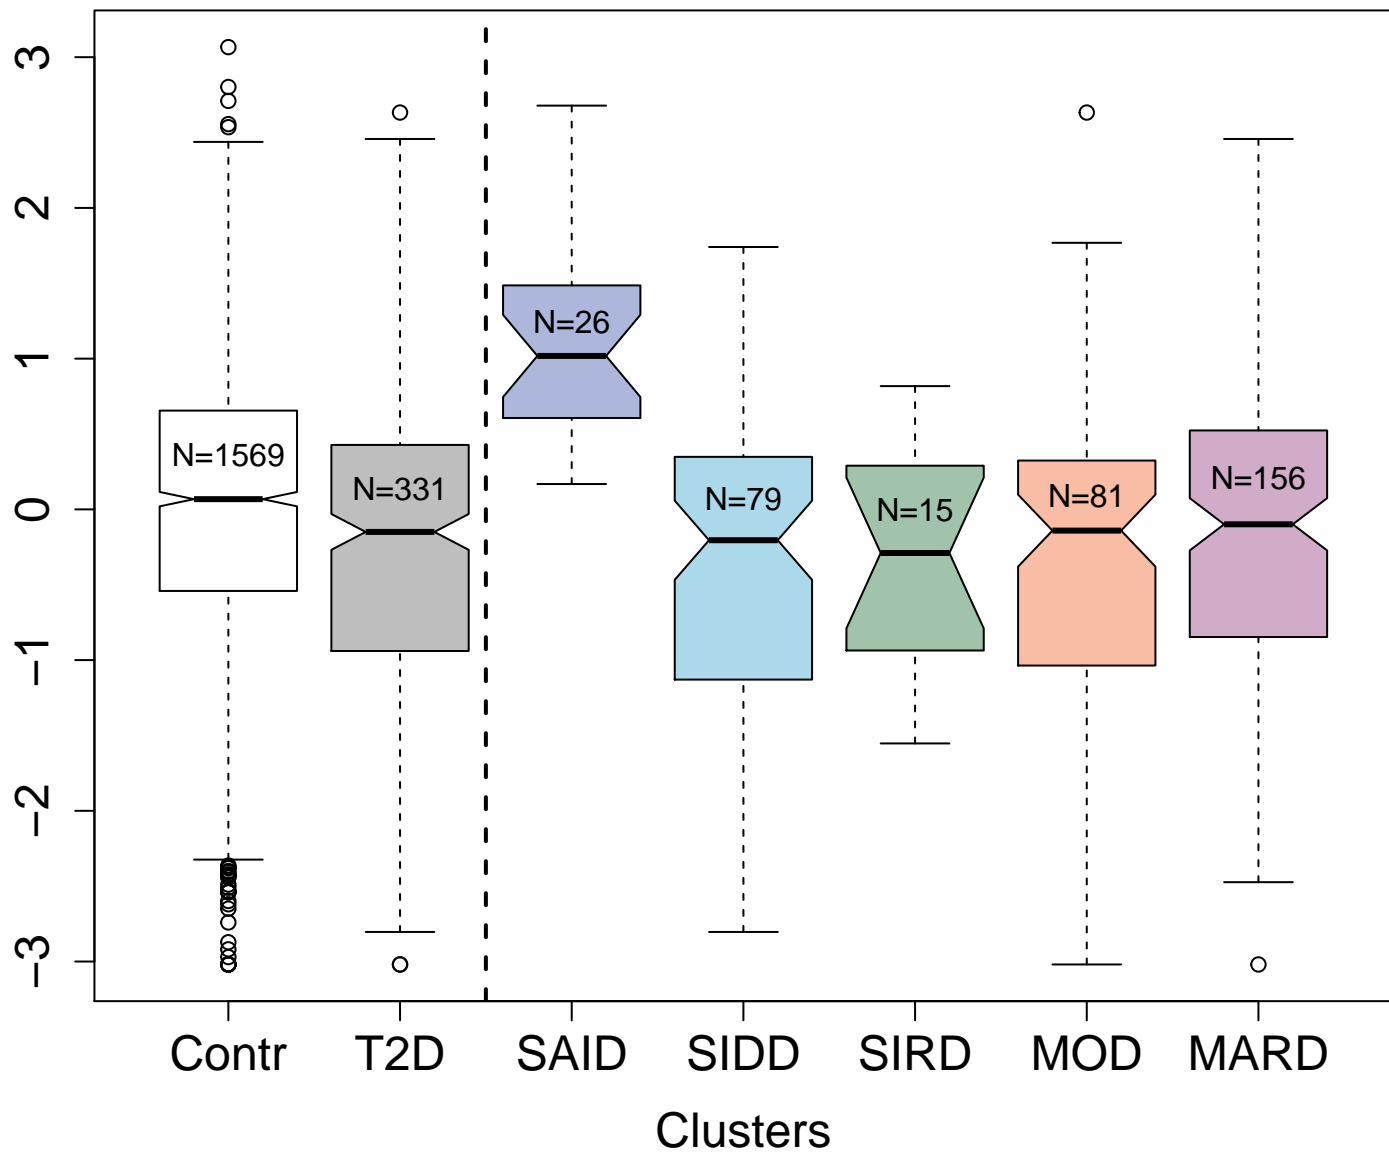

M22185 : N-acetylaspartate (NAA)

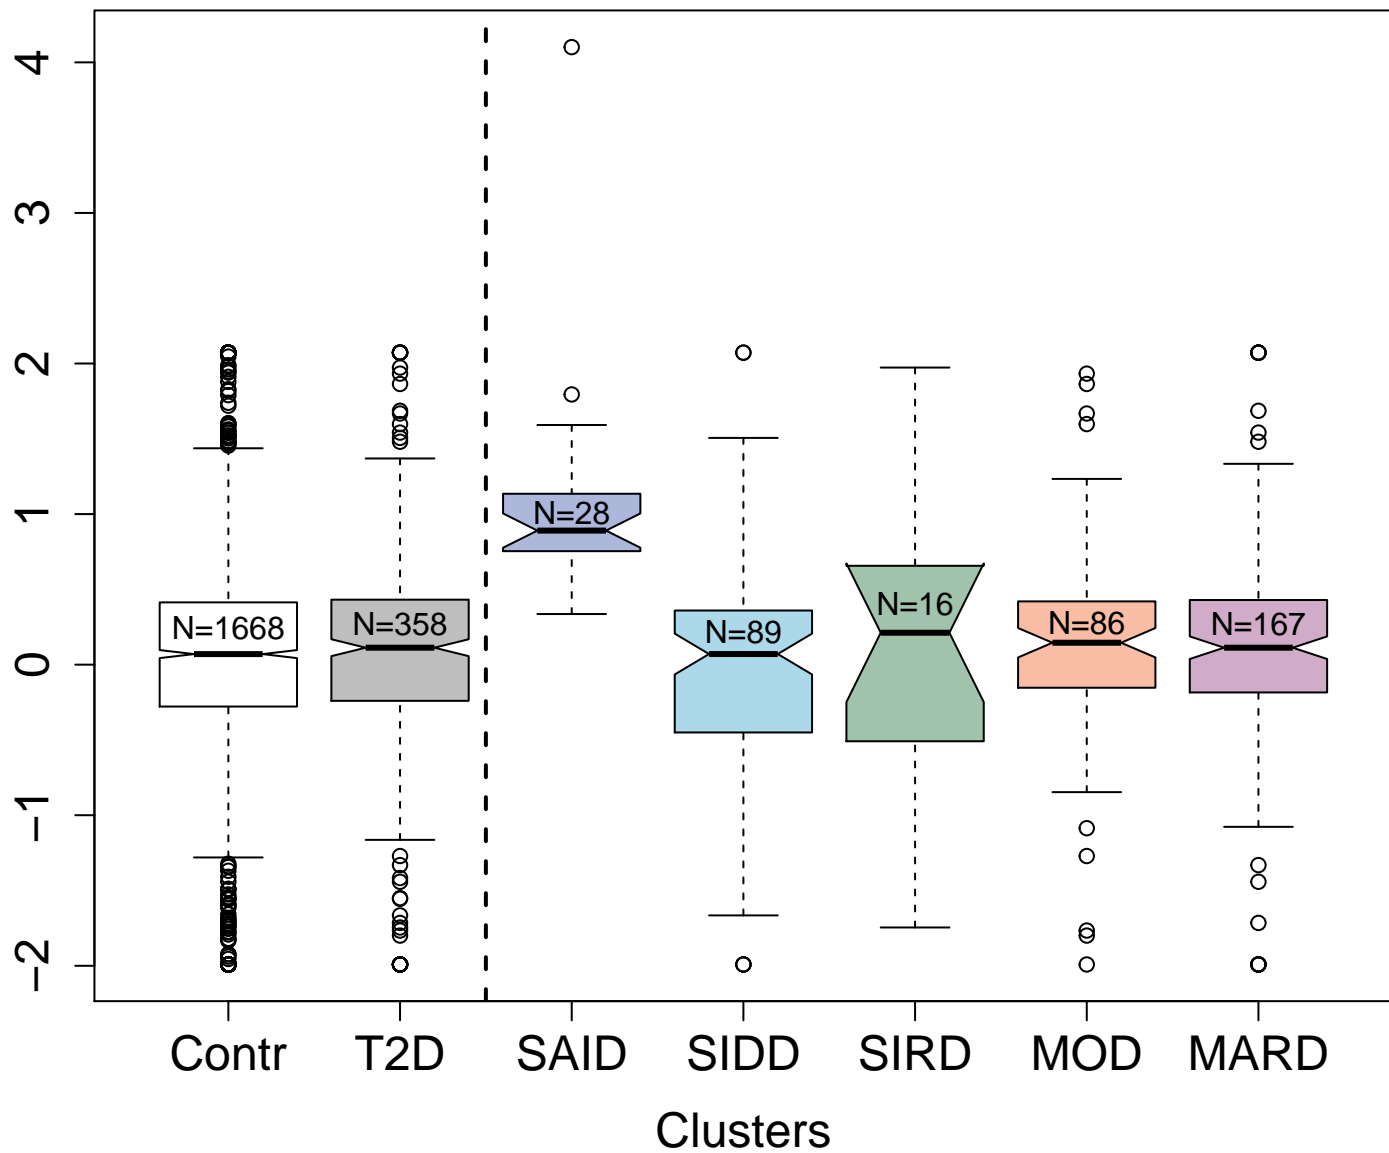

M42449 : 1-palmitoyl-2-linoleoyl-GPE (16:0/18:2)

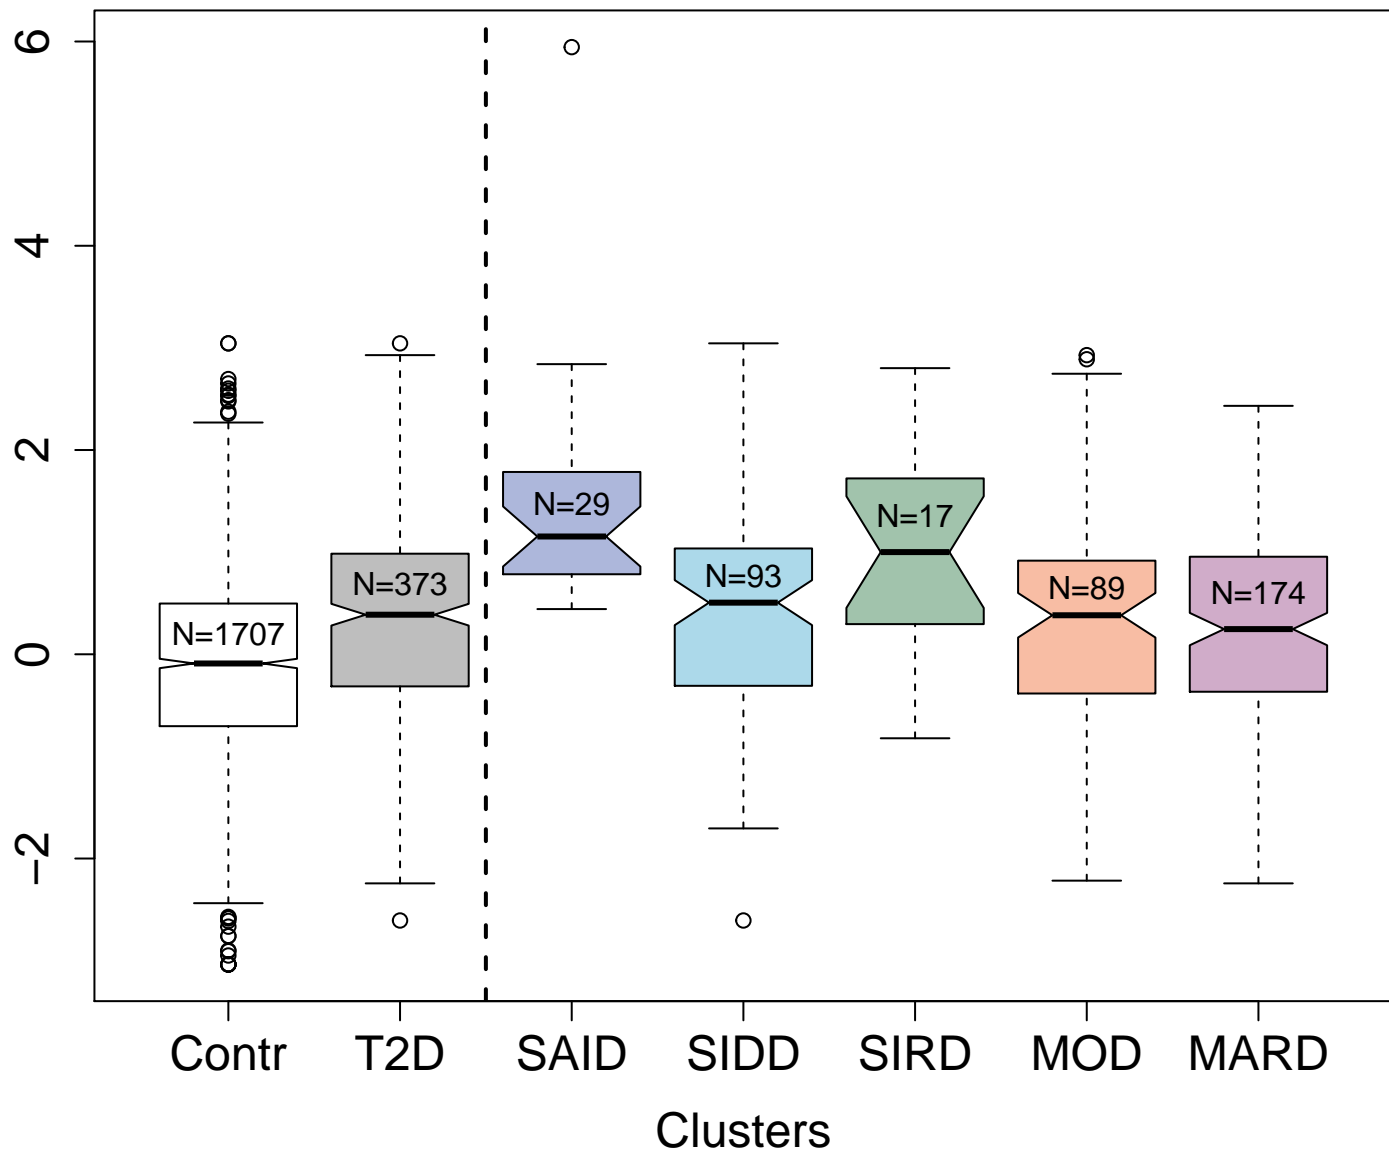



M52604 : N-palmitoyl-sphinganine (d18:0/16:0)

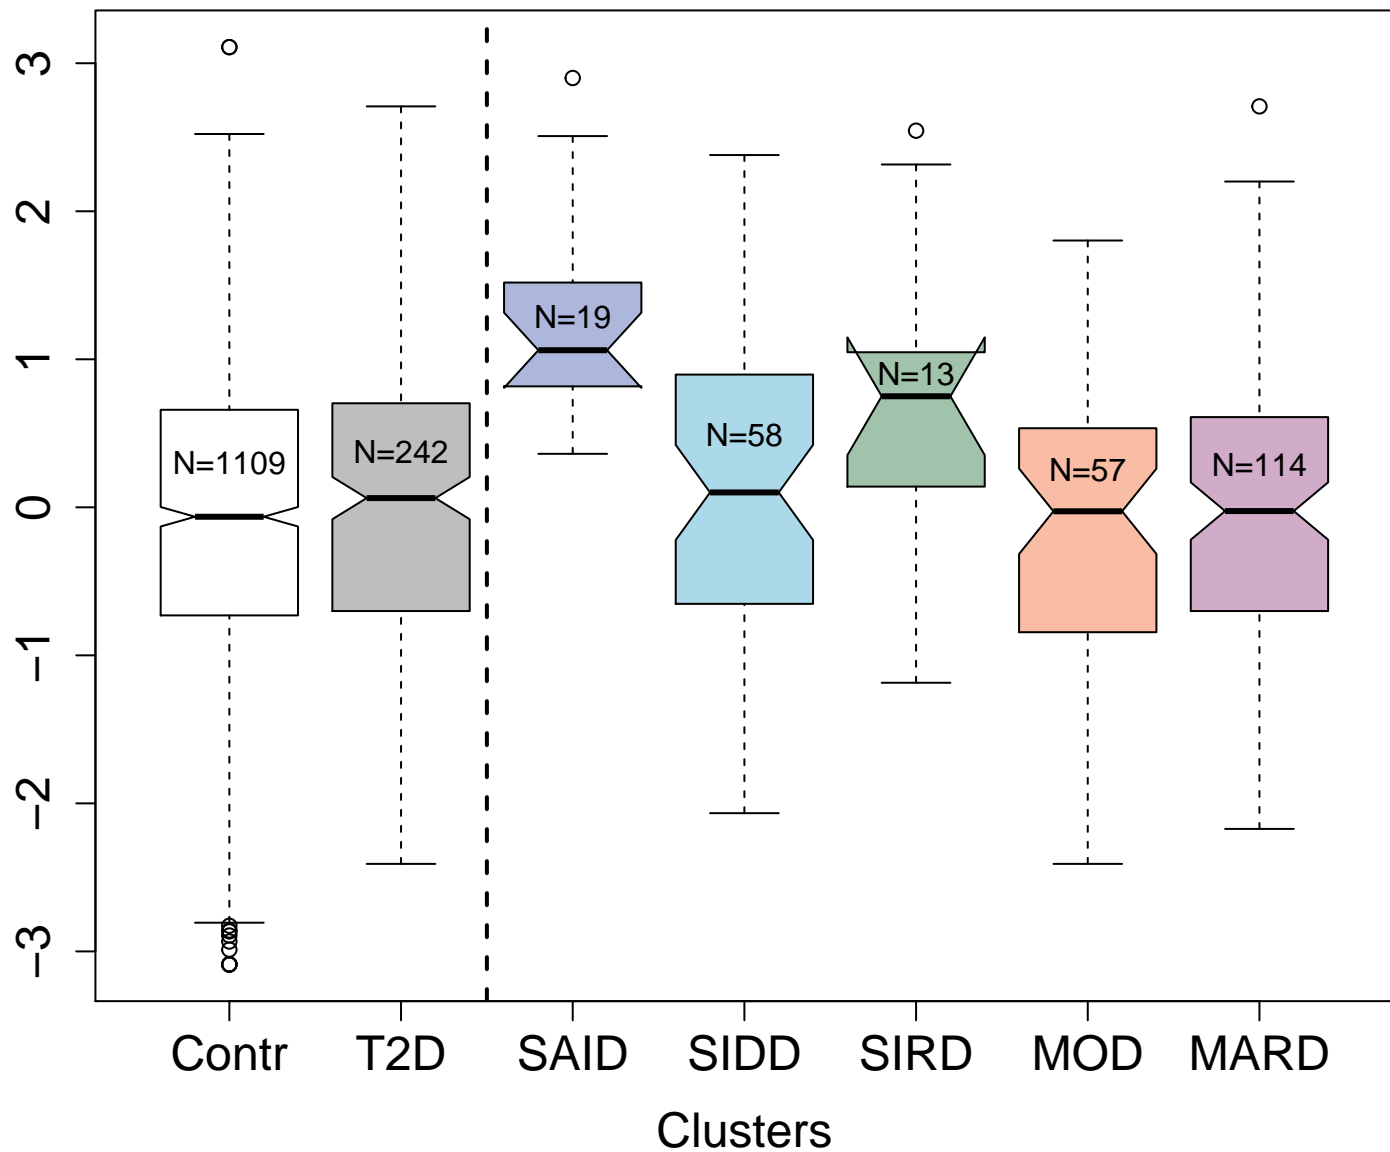

M37506 : palmitoyl sphingomyelin (d18:1/16:0)

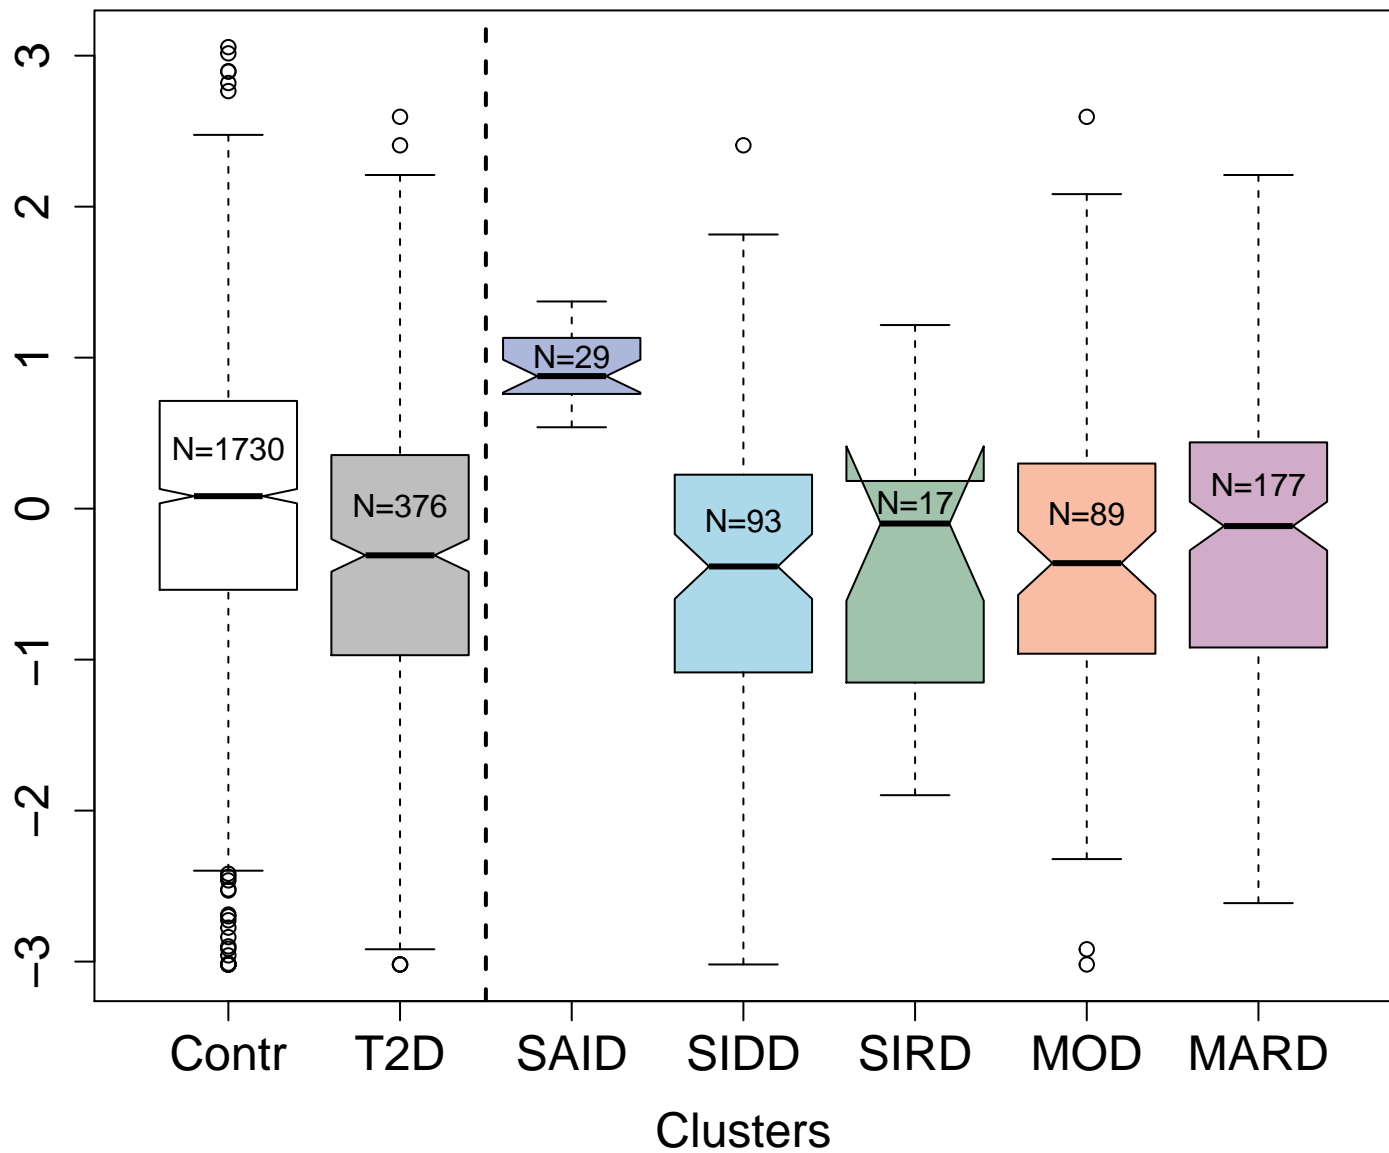

M27718 : creatine

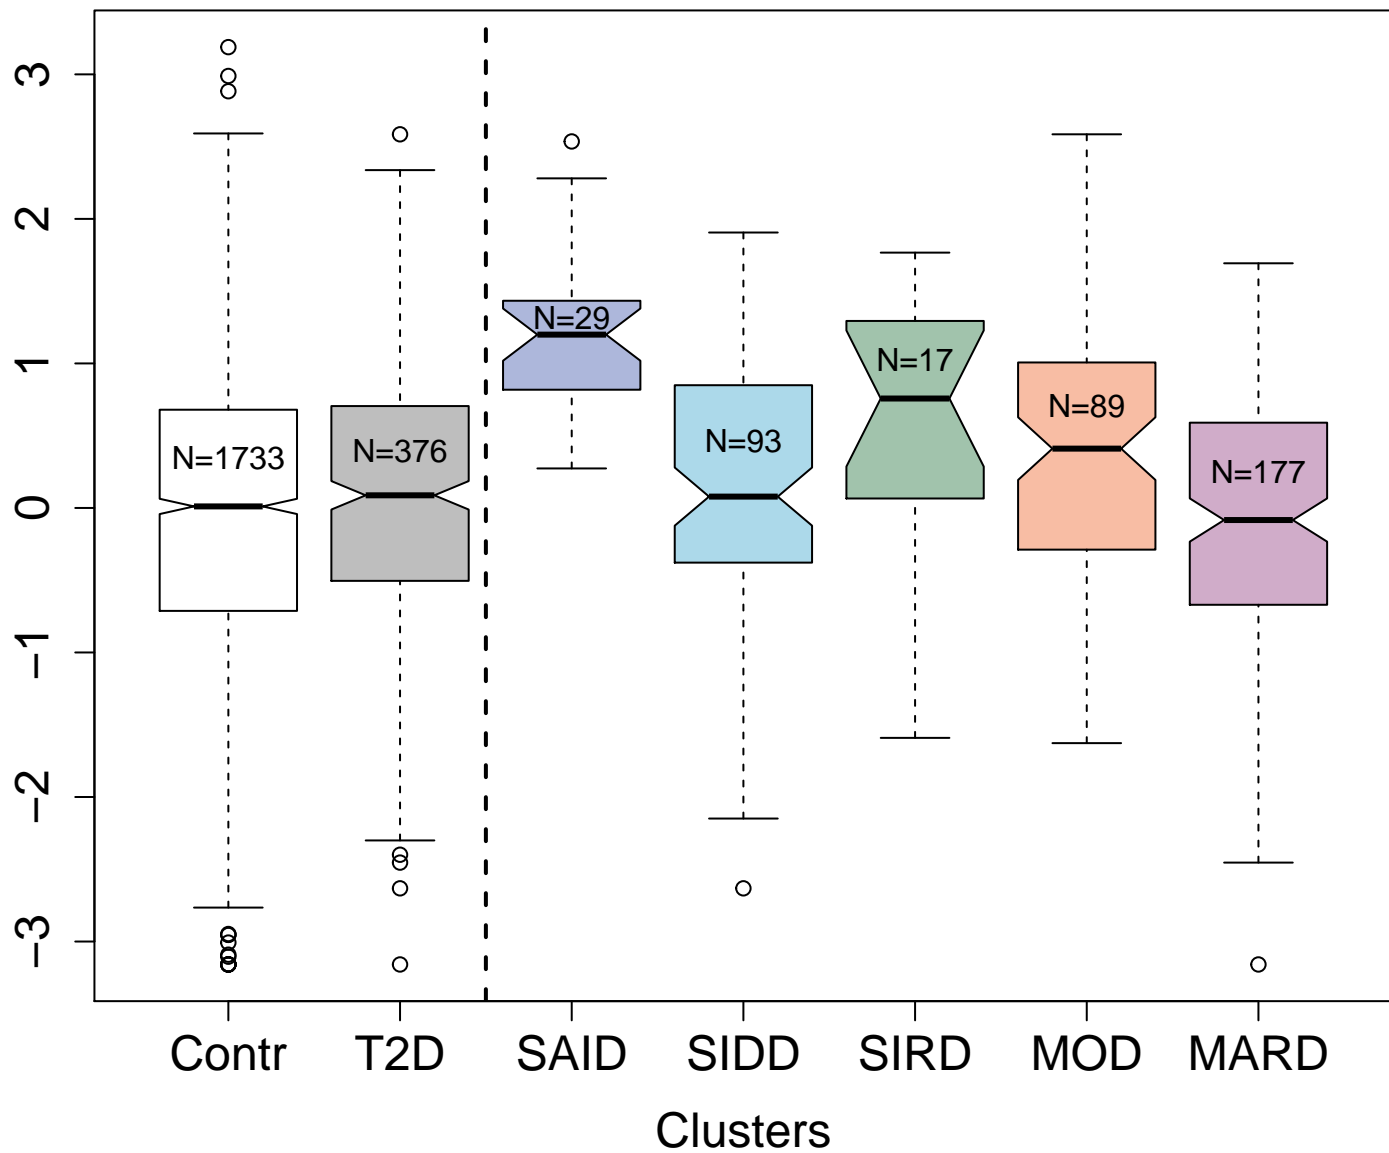

M52234 : glycosyl-N-stearoyl-sphingosine (d18:1/18:0)

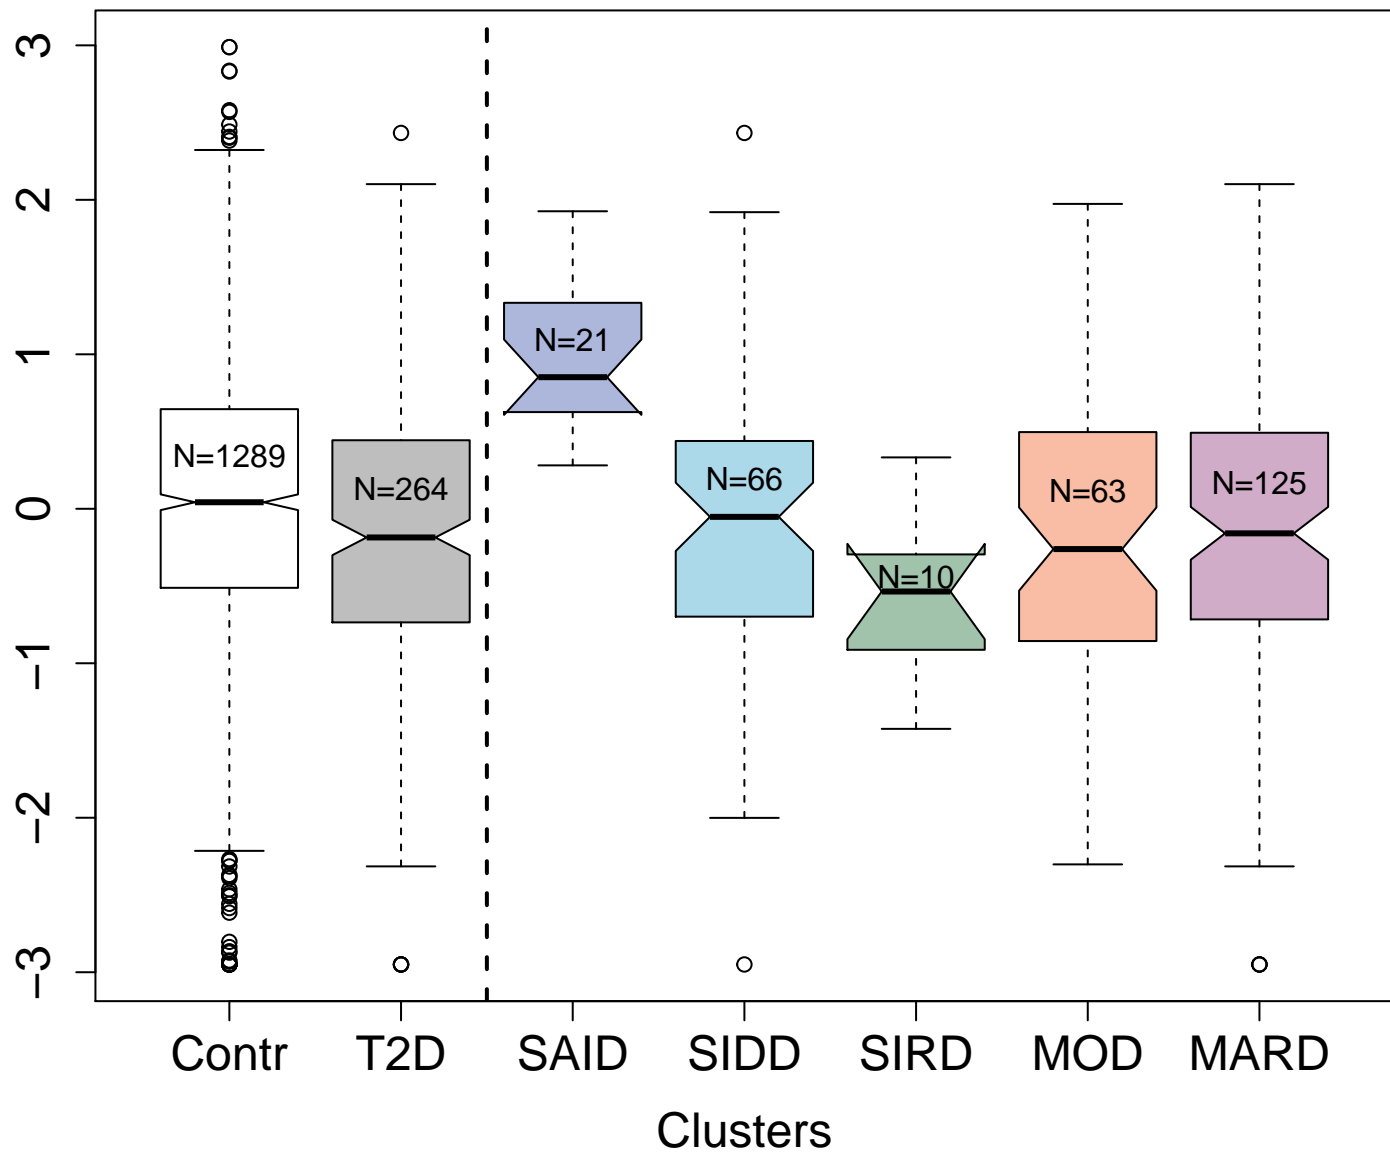

M37076 : N-acetyls erine

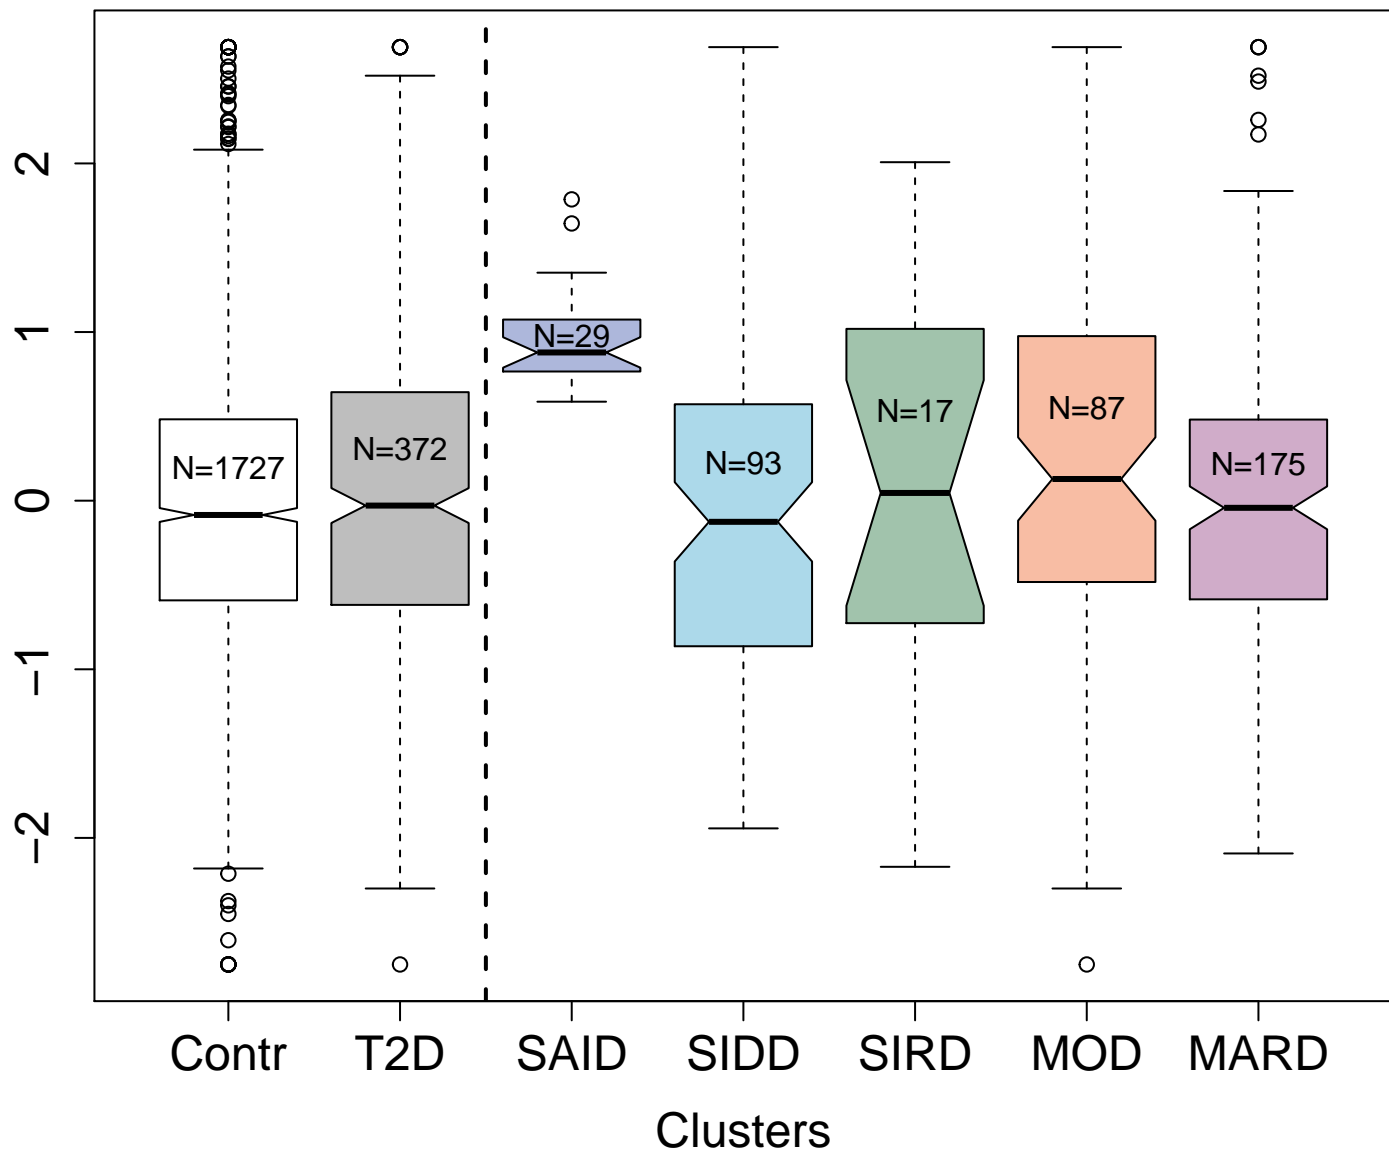

M46709 : X - 17654

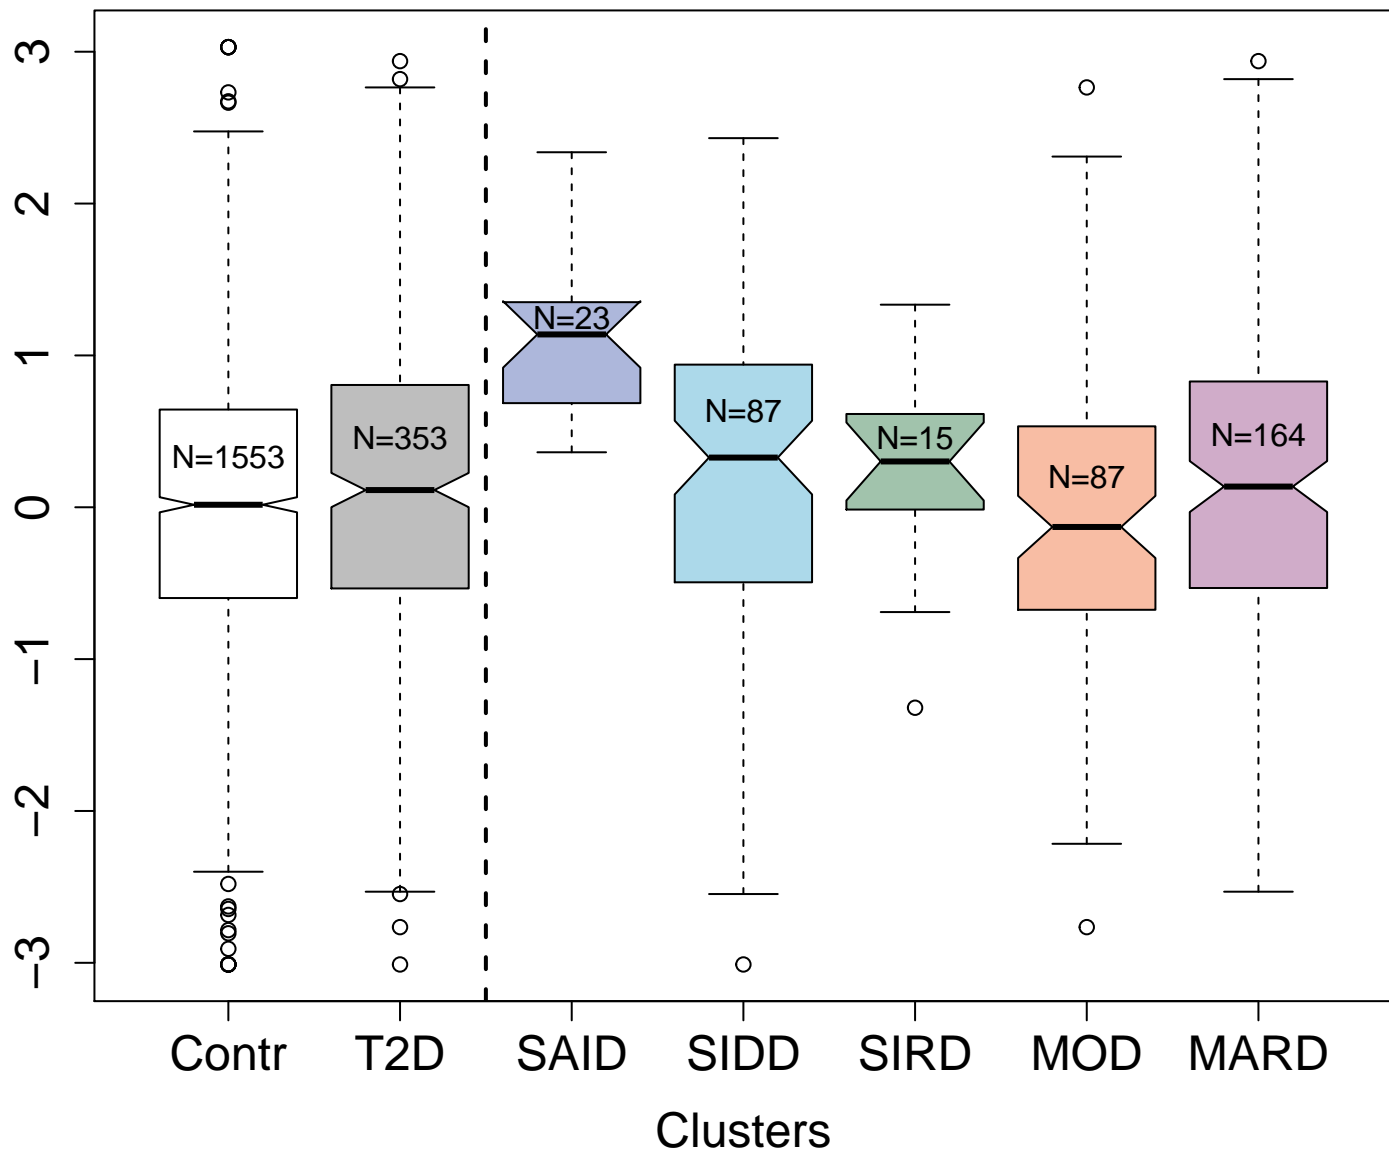

M46266 : X - 15486

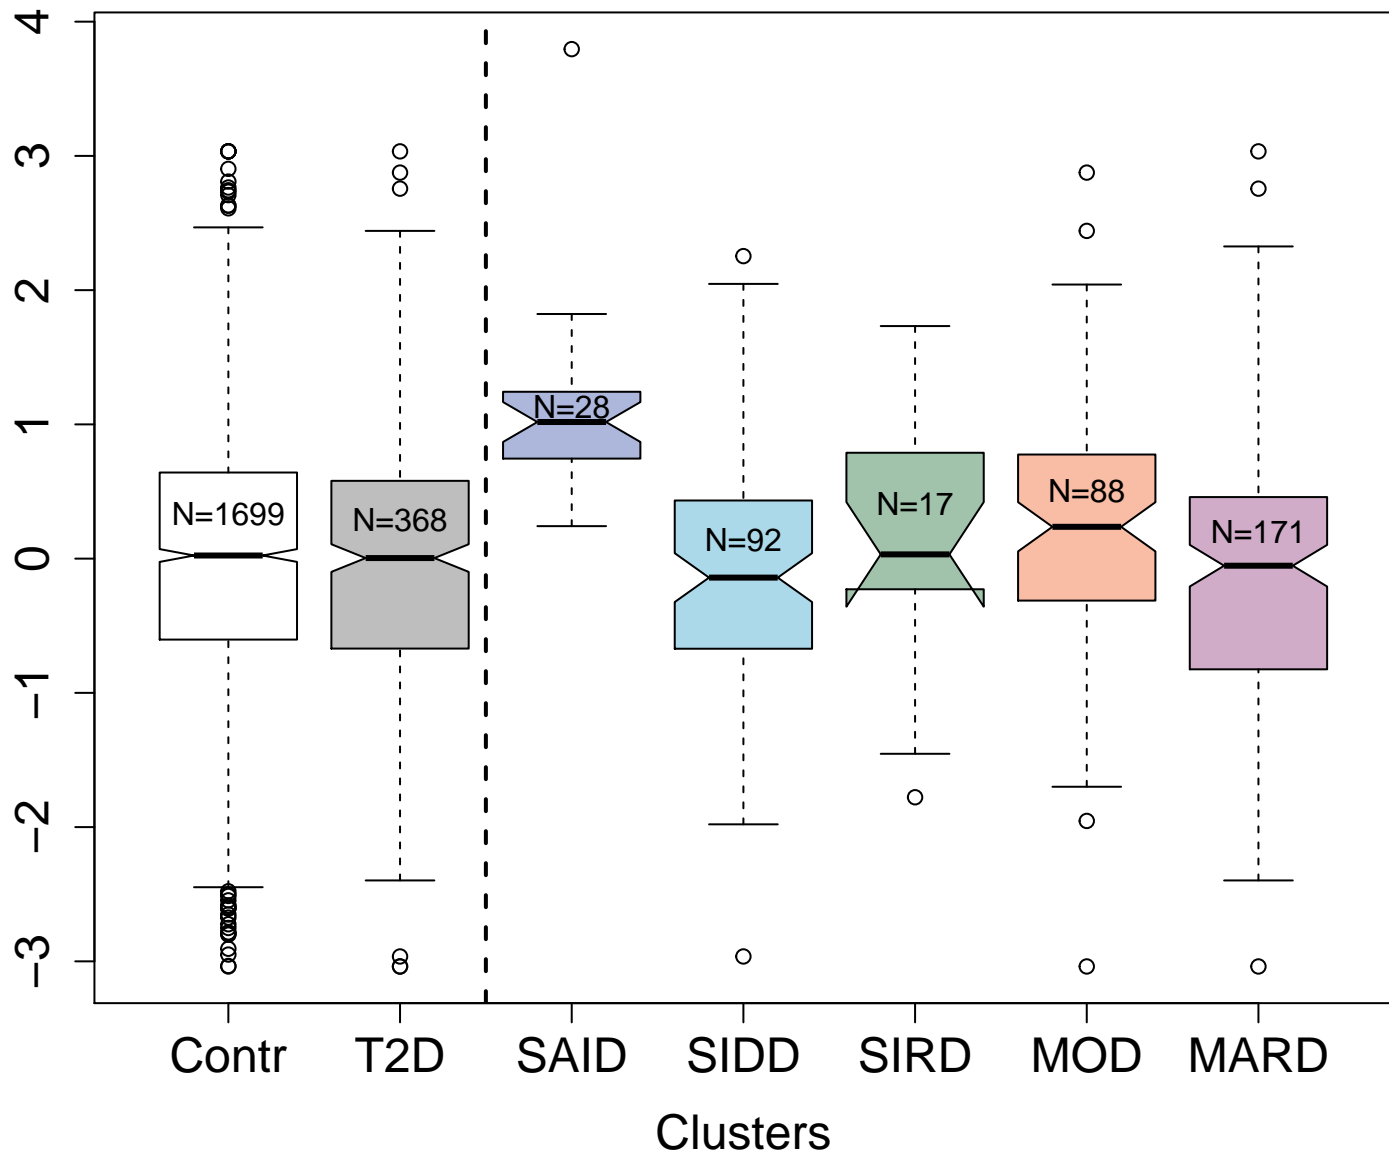

M62923 : eicosenedioate (C20:1-DC)\*

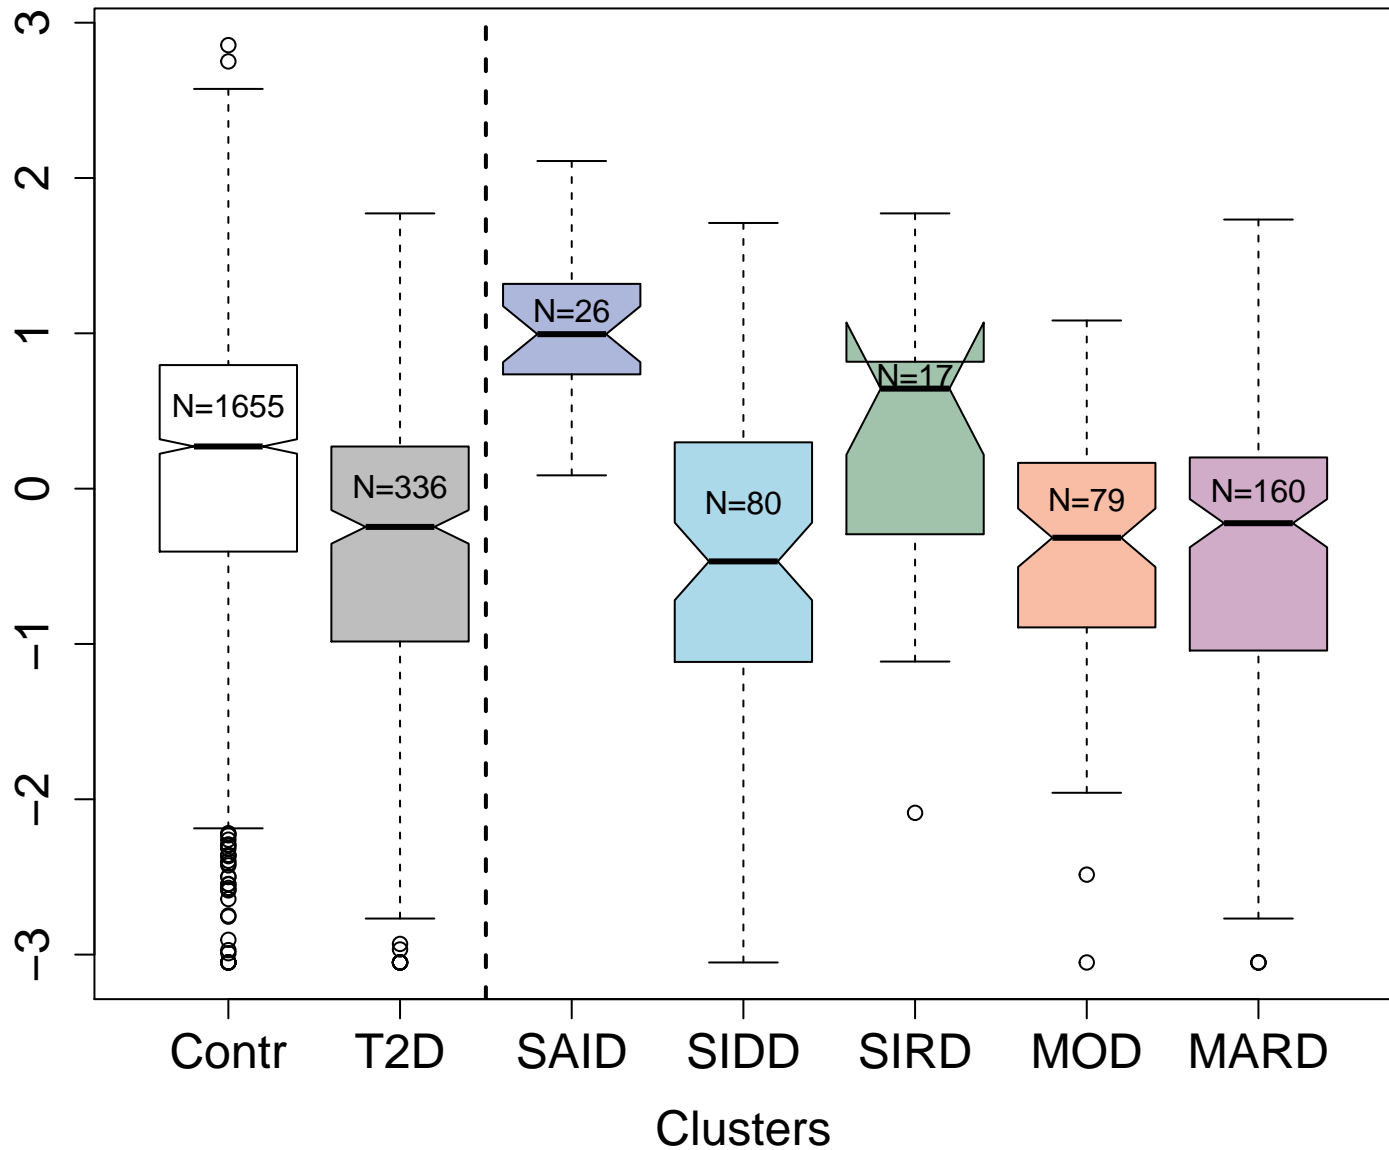



M33973 : epiandrosterone sulfate

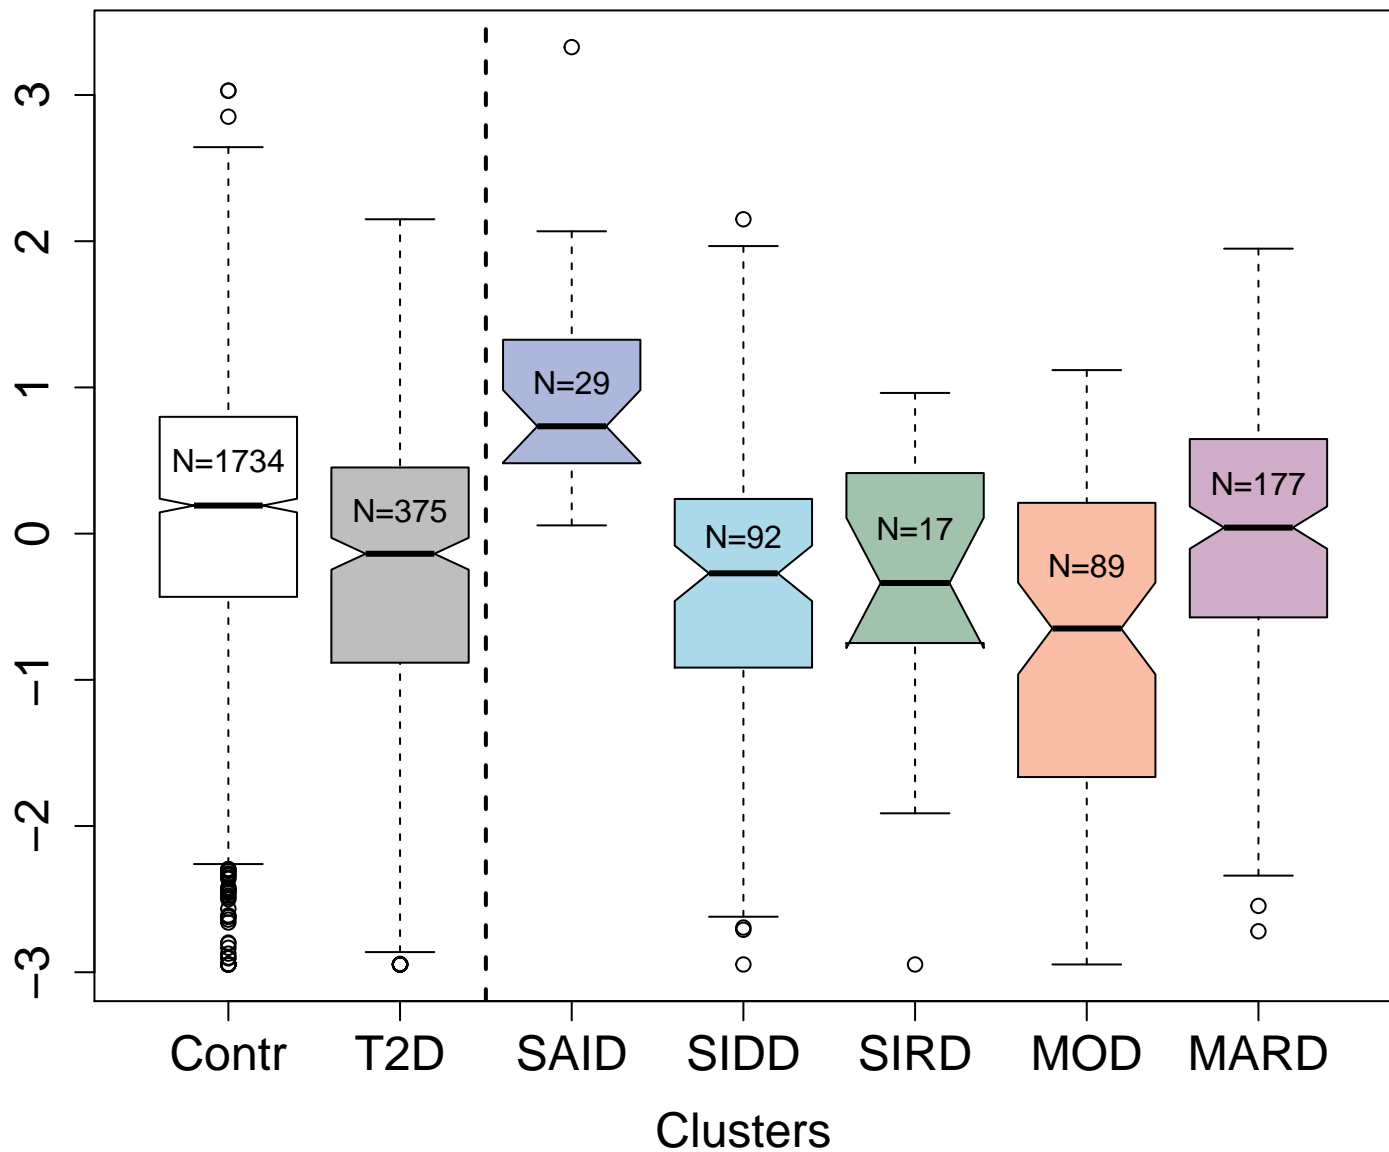

M38662 : cotinine N-oxide

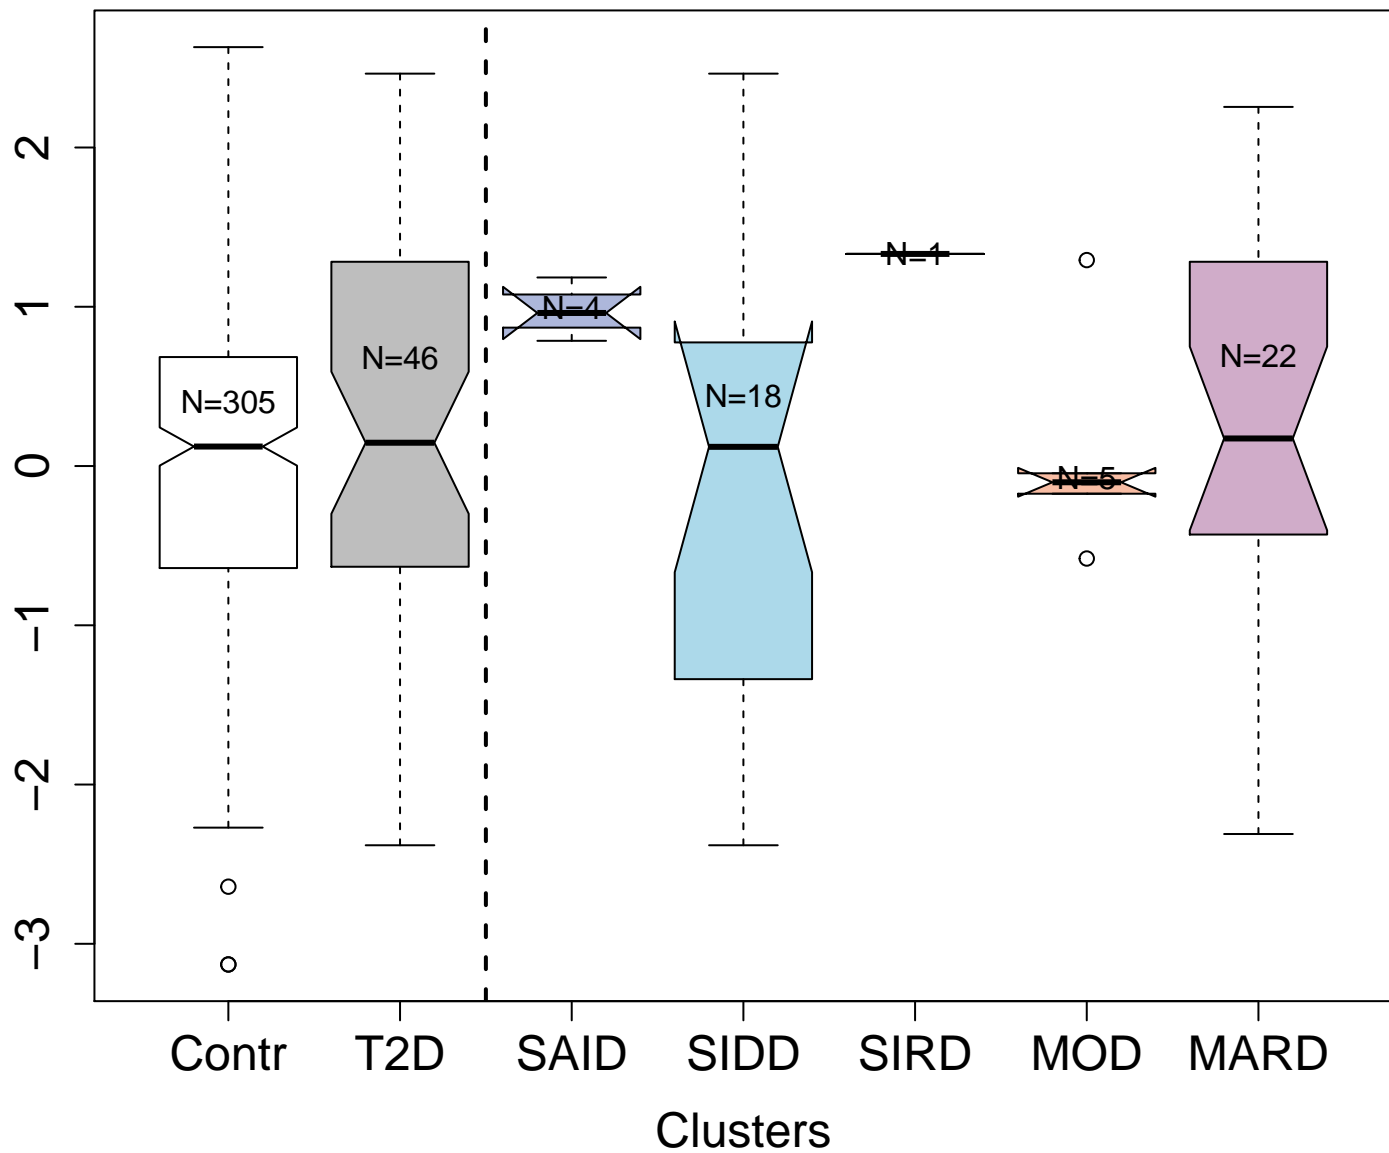

M39271 : 1-(1-enyl-stearoyl)-GPE (P-18:0)\*

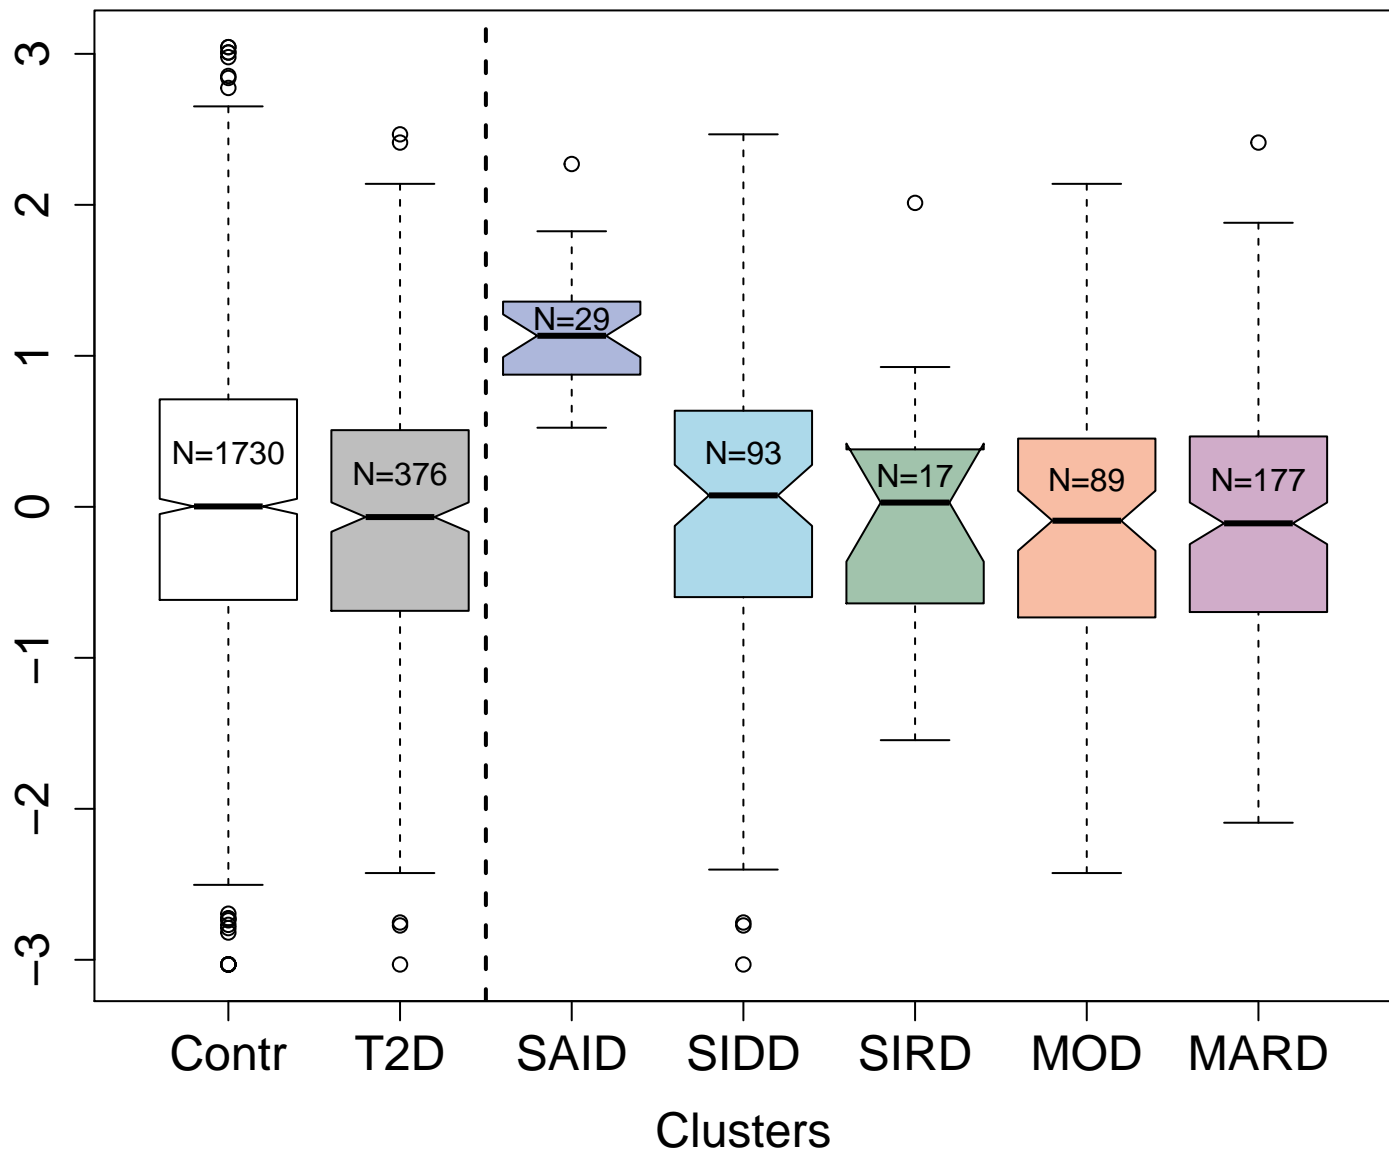

M35635 : 3-(3-hydroxyphenyl)propionate

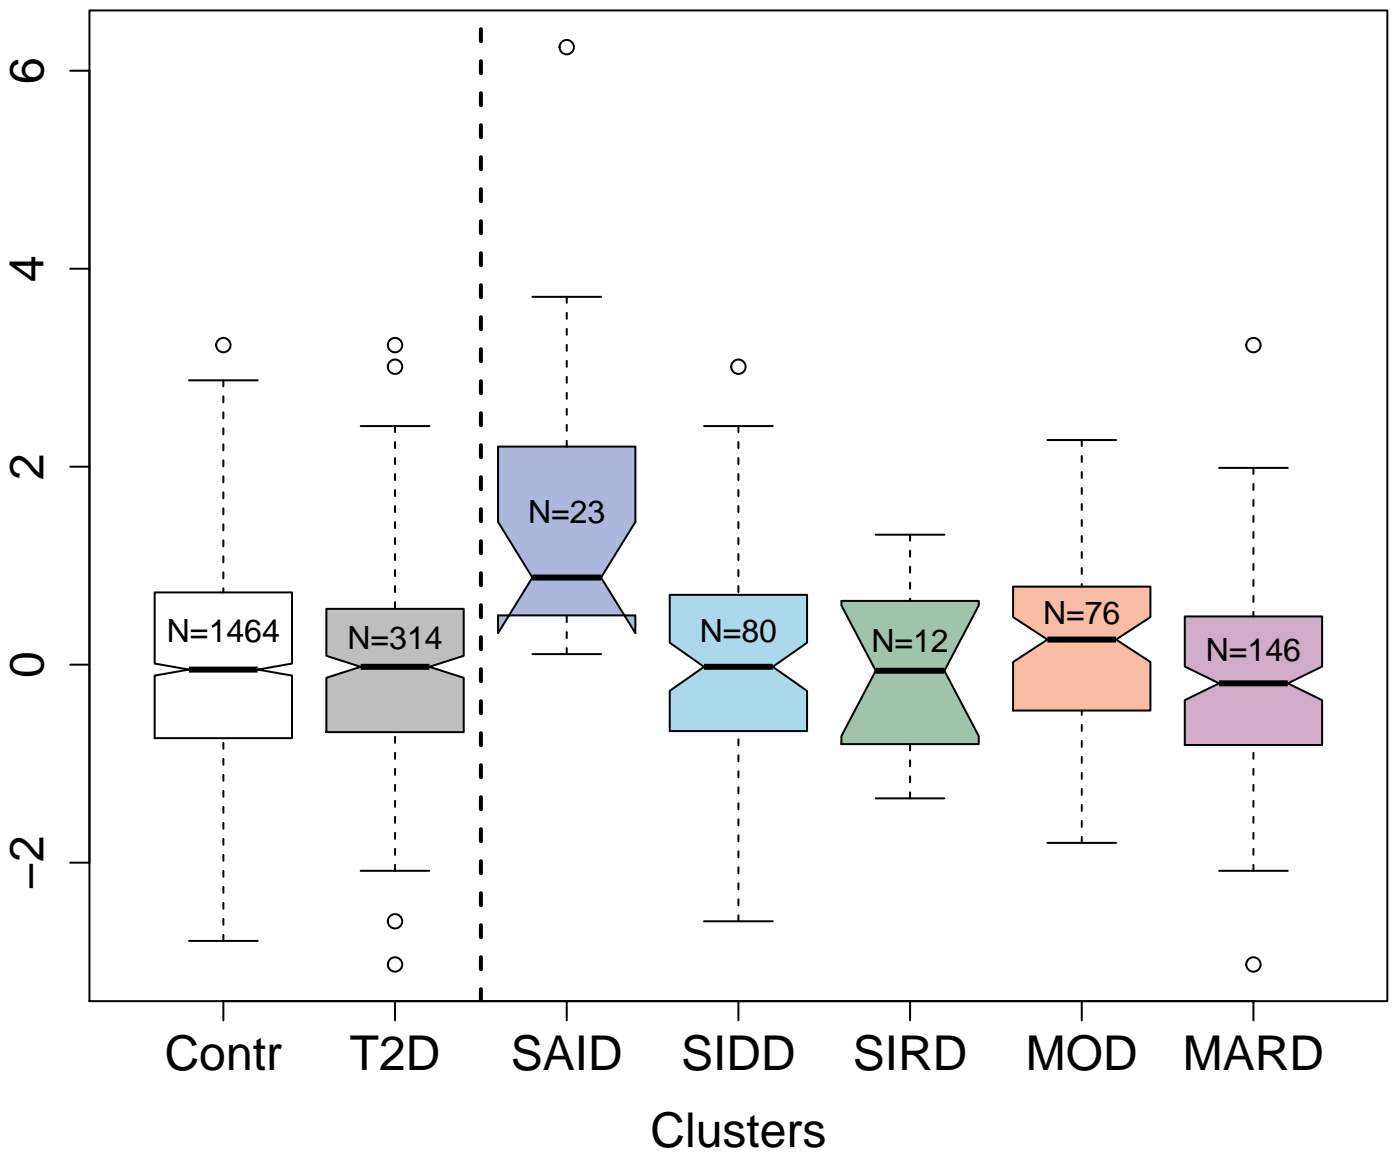



M35253 : 2-palmitoyl-GPC (16:0)\*

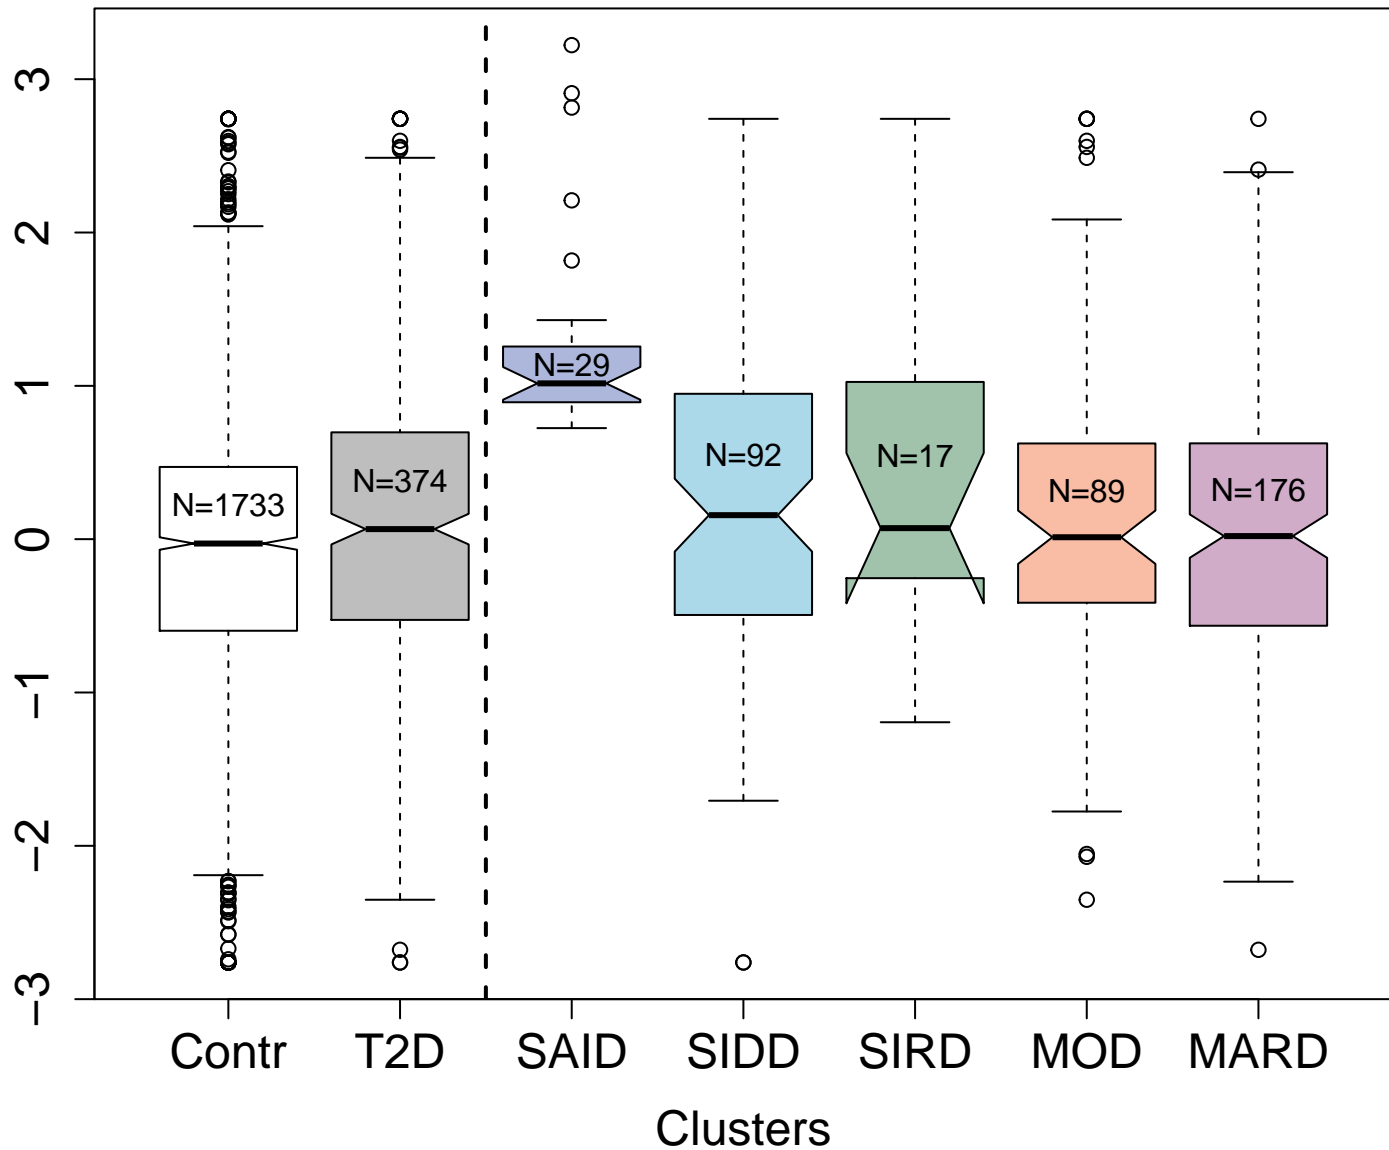

M18467 : eicosapentaenoate (EPA; 20:5n3)

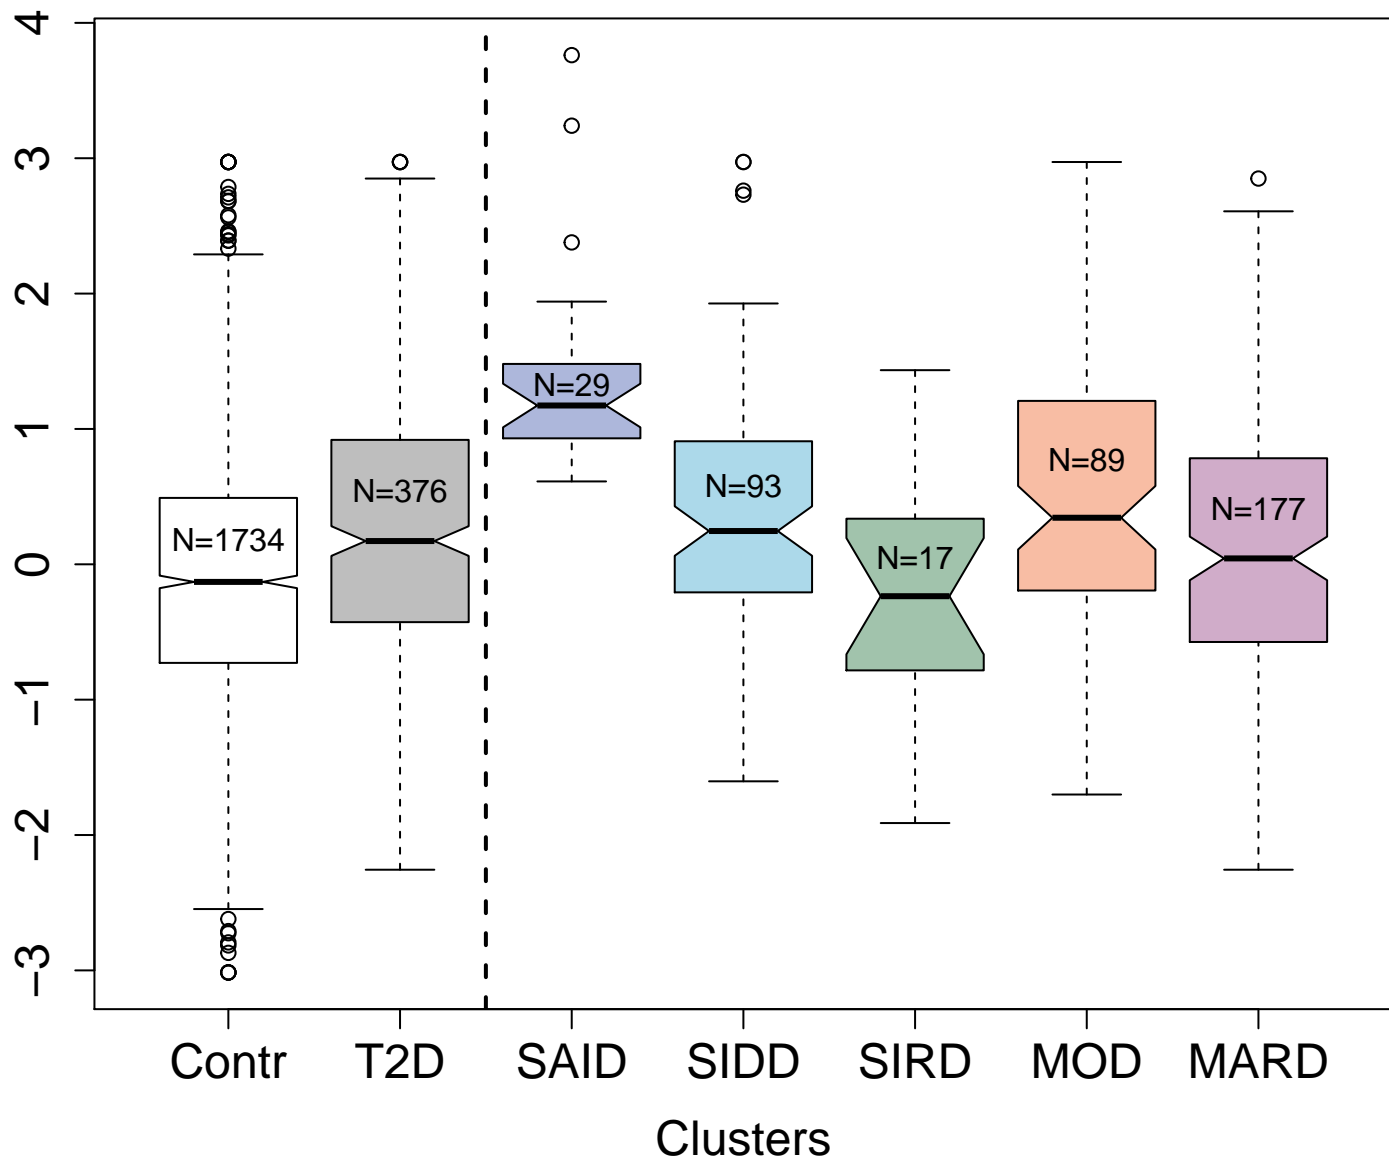

M42381 : gamma-CEHC glucuronide\*

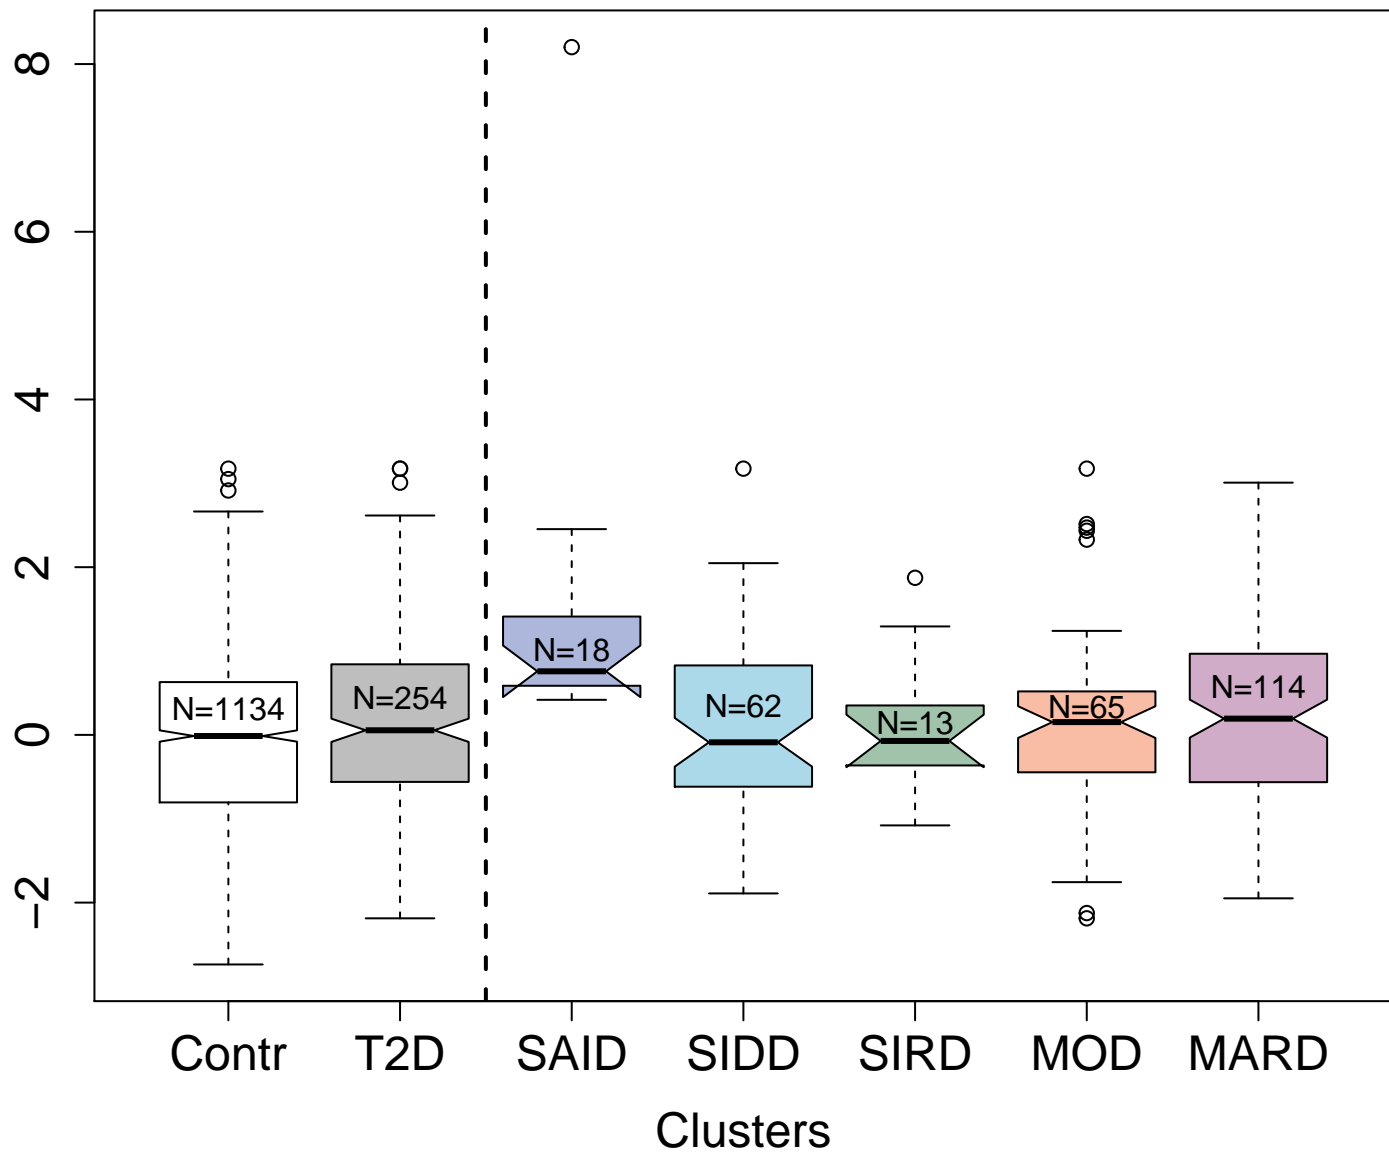



M63236 : 3-hydroxypyridine glucuronide

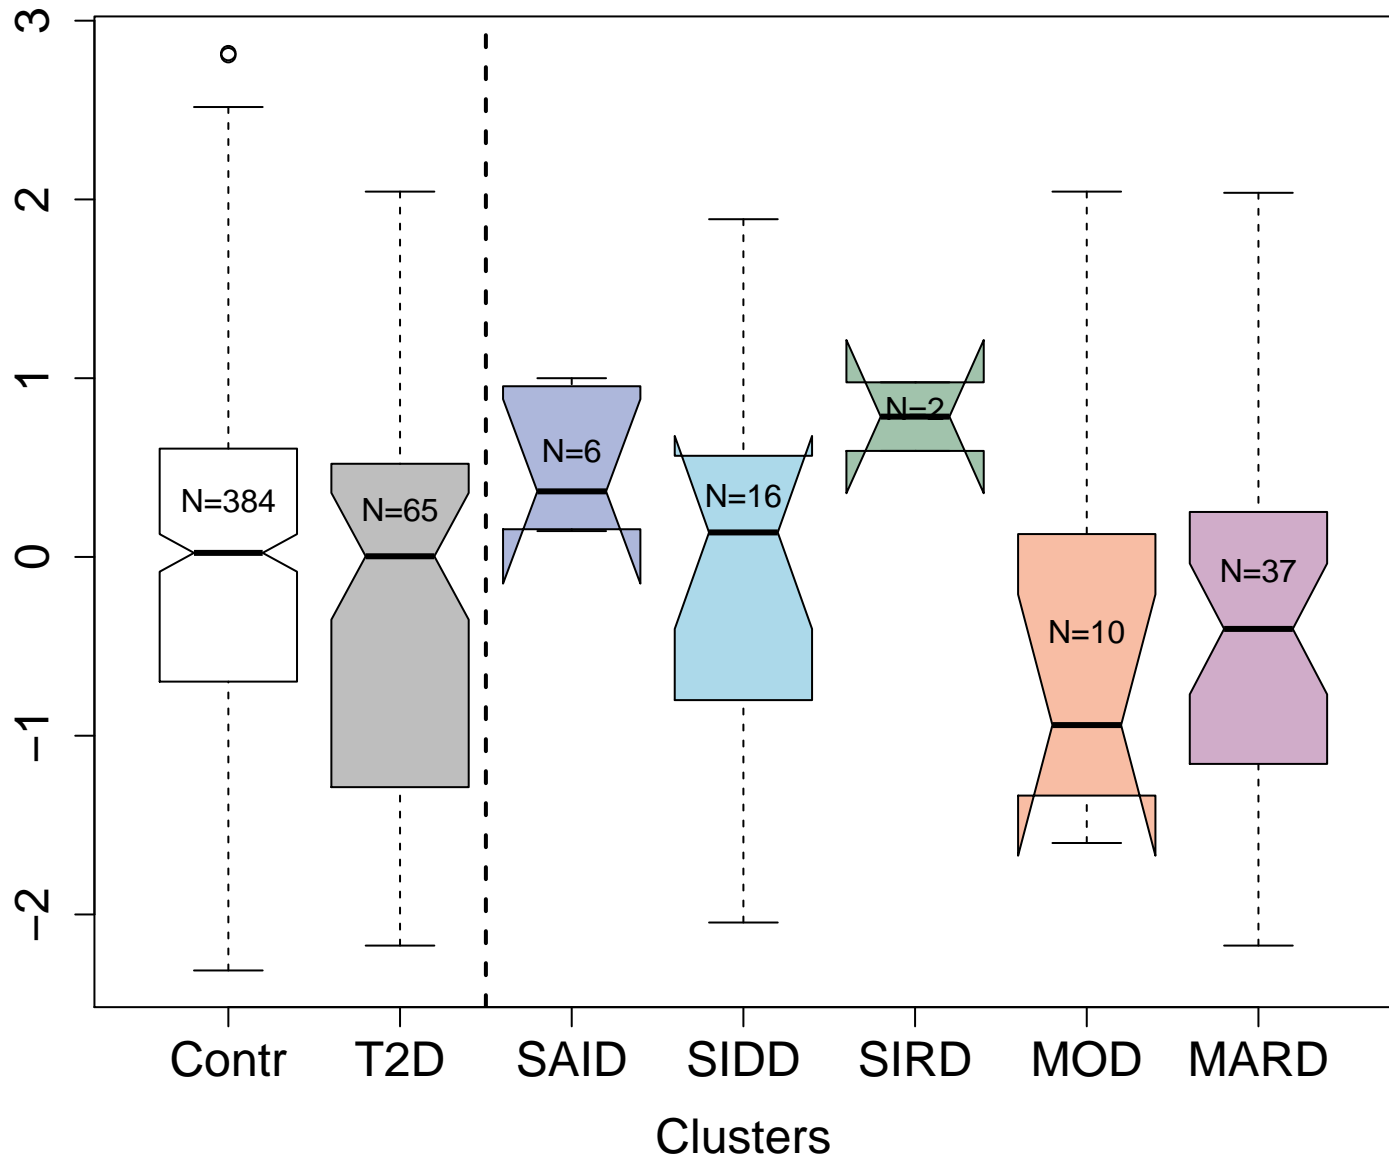

M40708 : pregnanediol-3-glucuronide

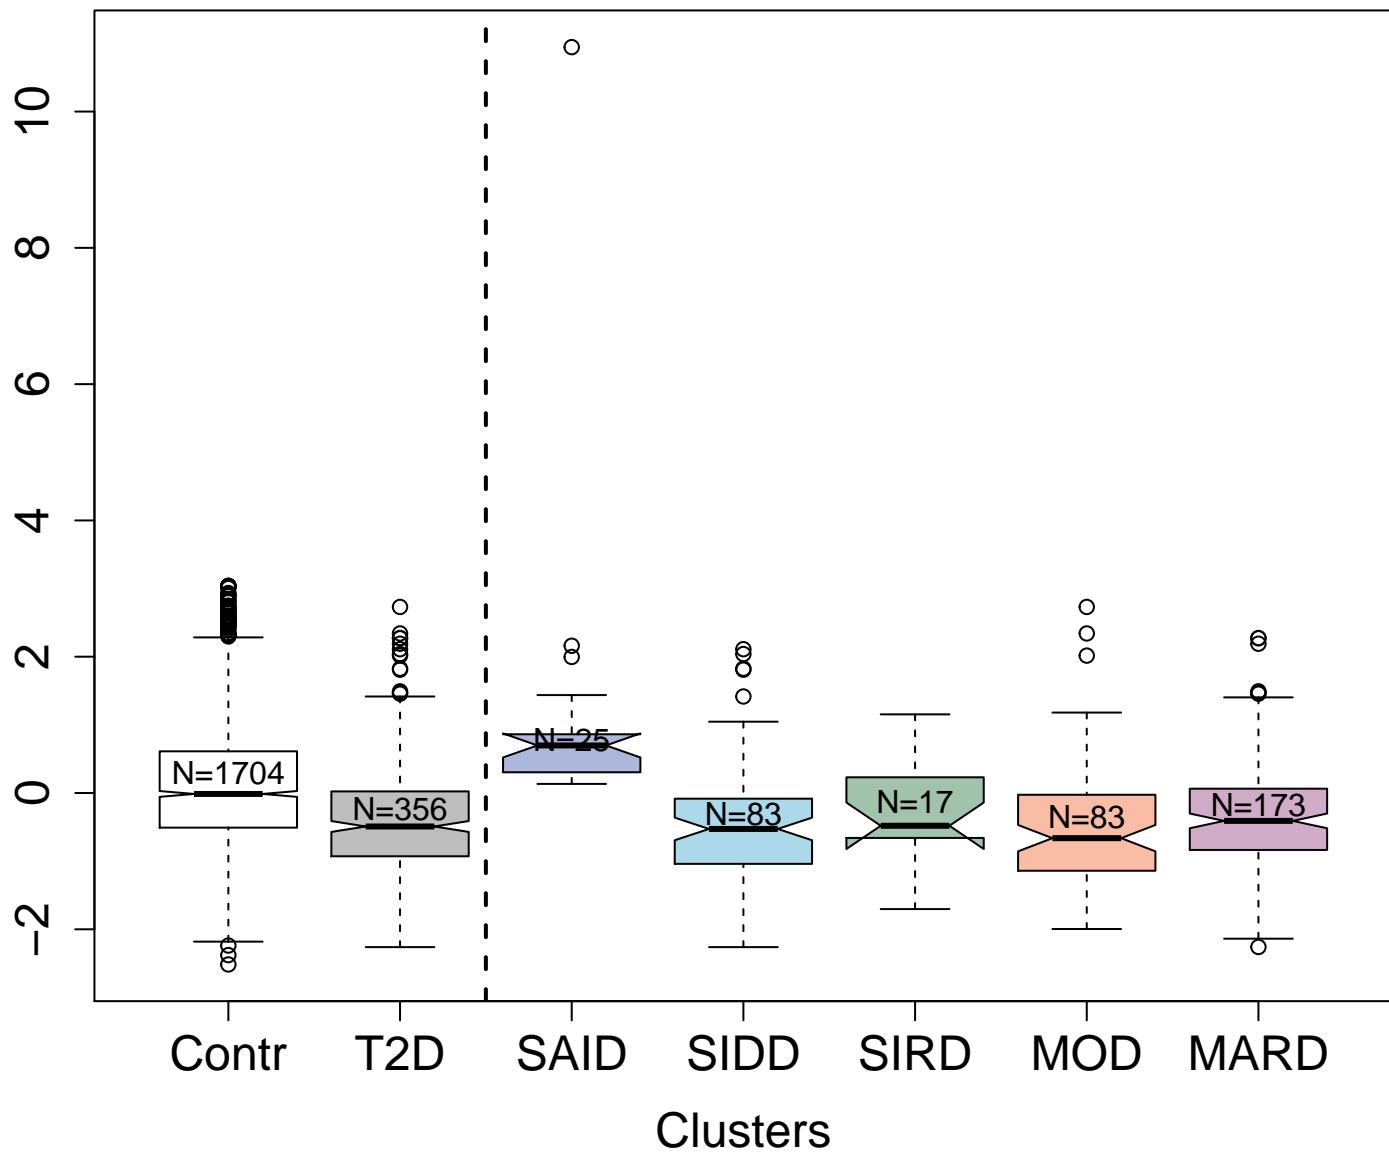

M52974 : glycochenodeoxycholate 3-sulfate

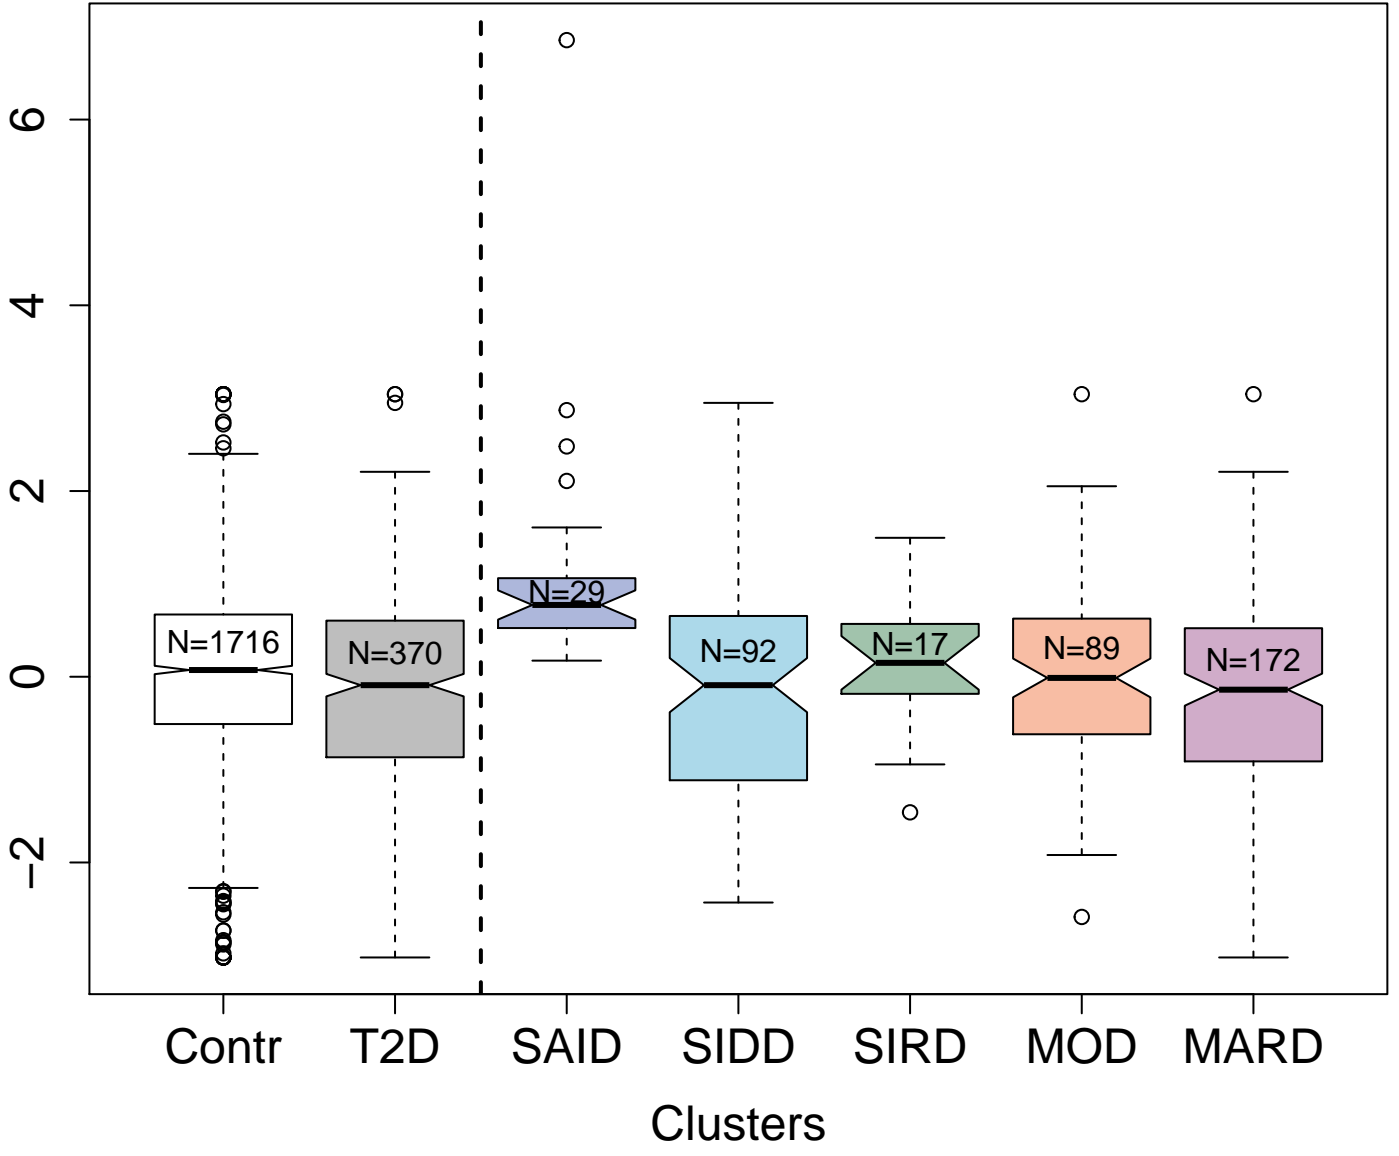

M54 : tryptophan

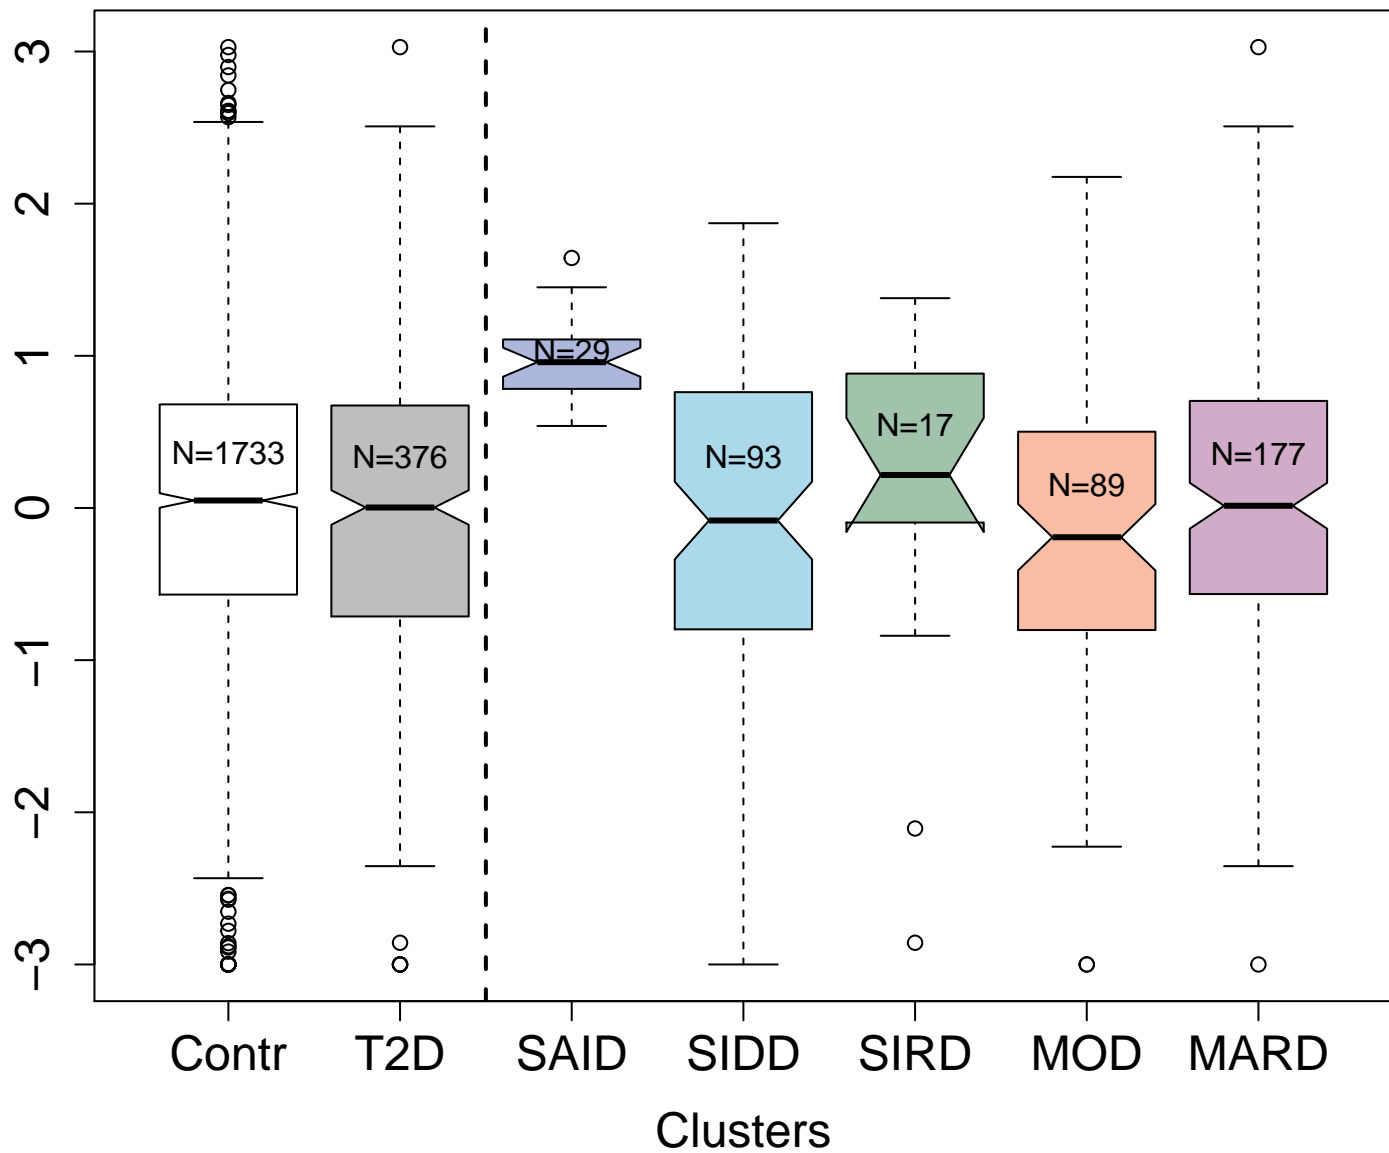

M32492 : caprylate (8:0)

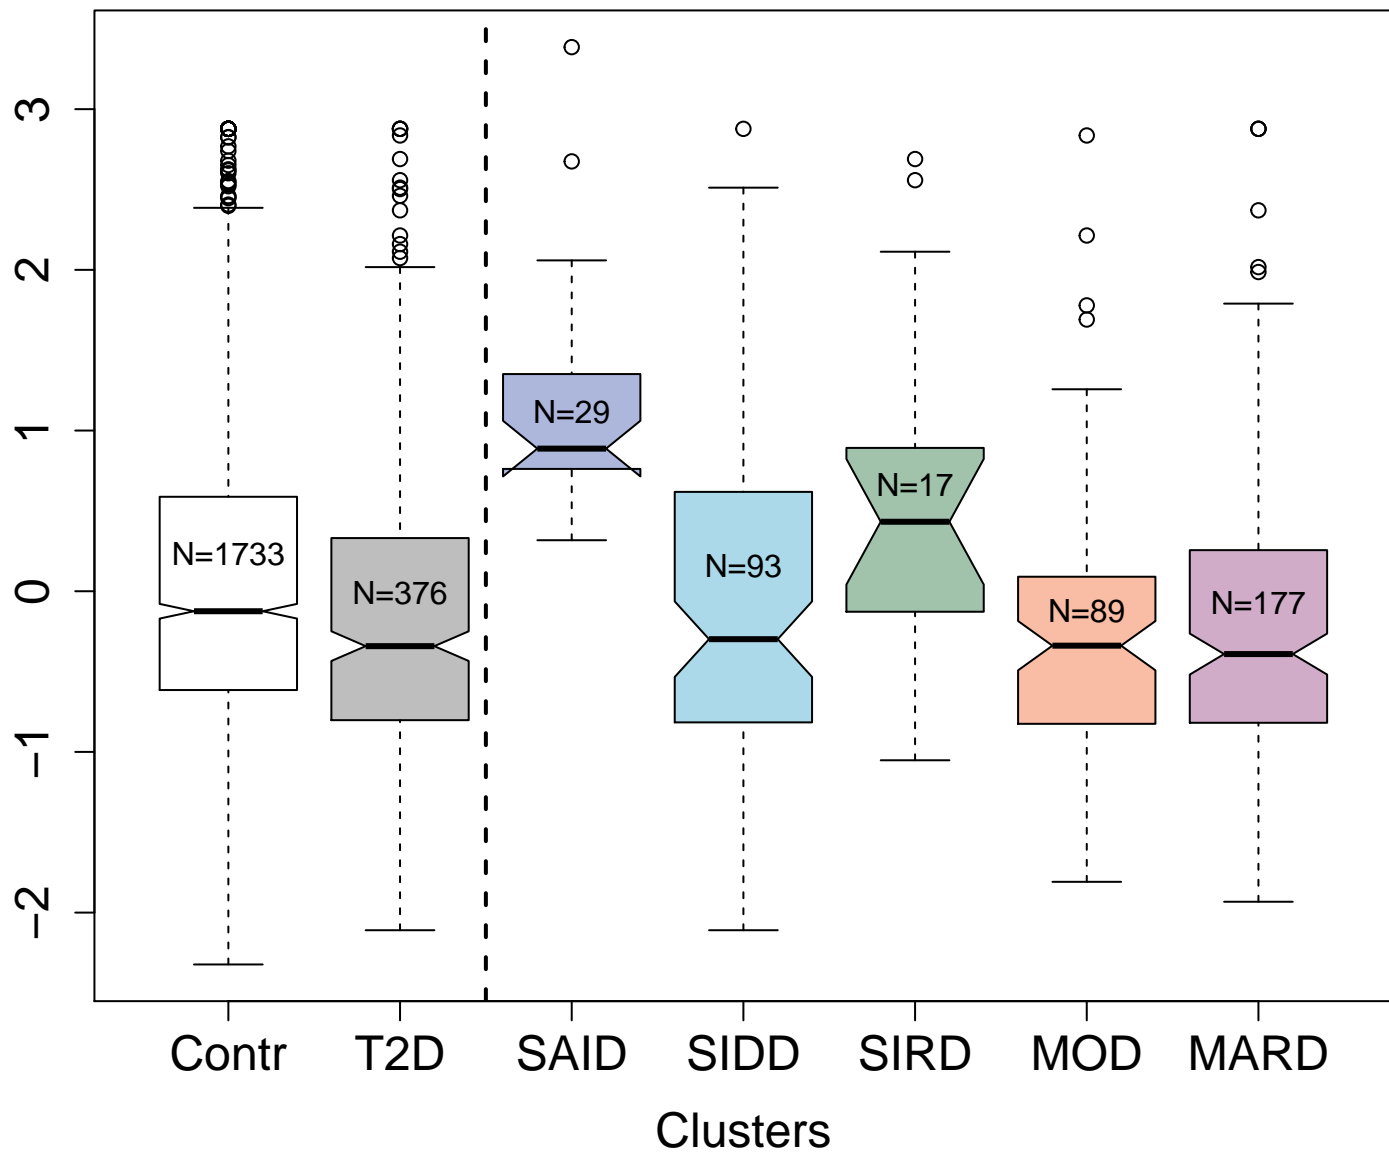

M49532 : X - 23655

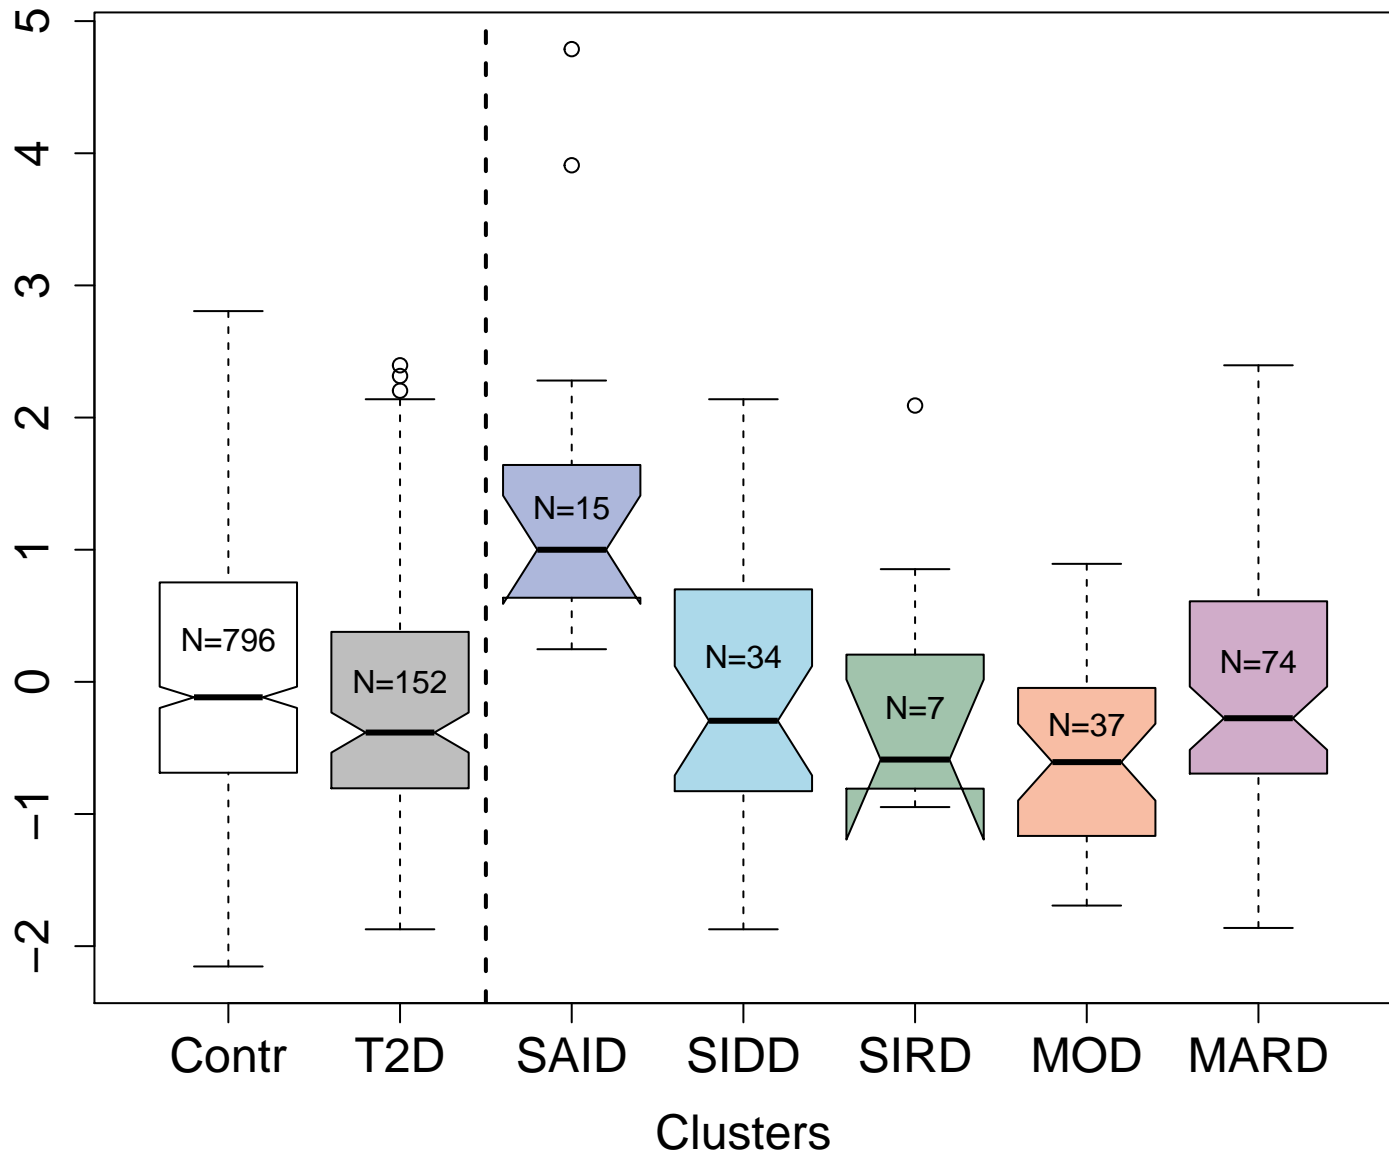

M43592 : 4-methylbenzenesulfonate

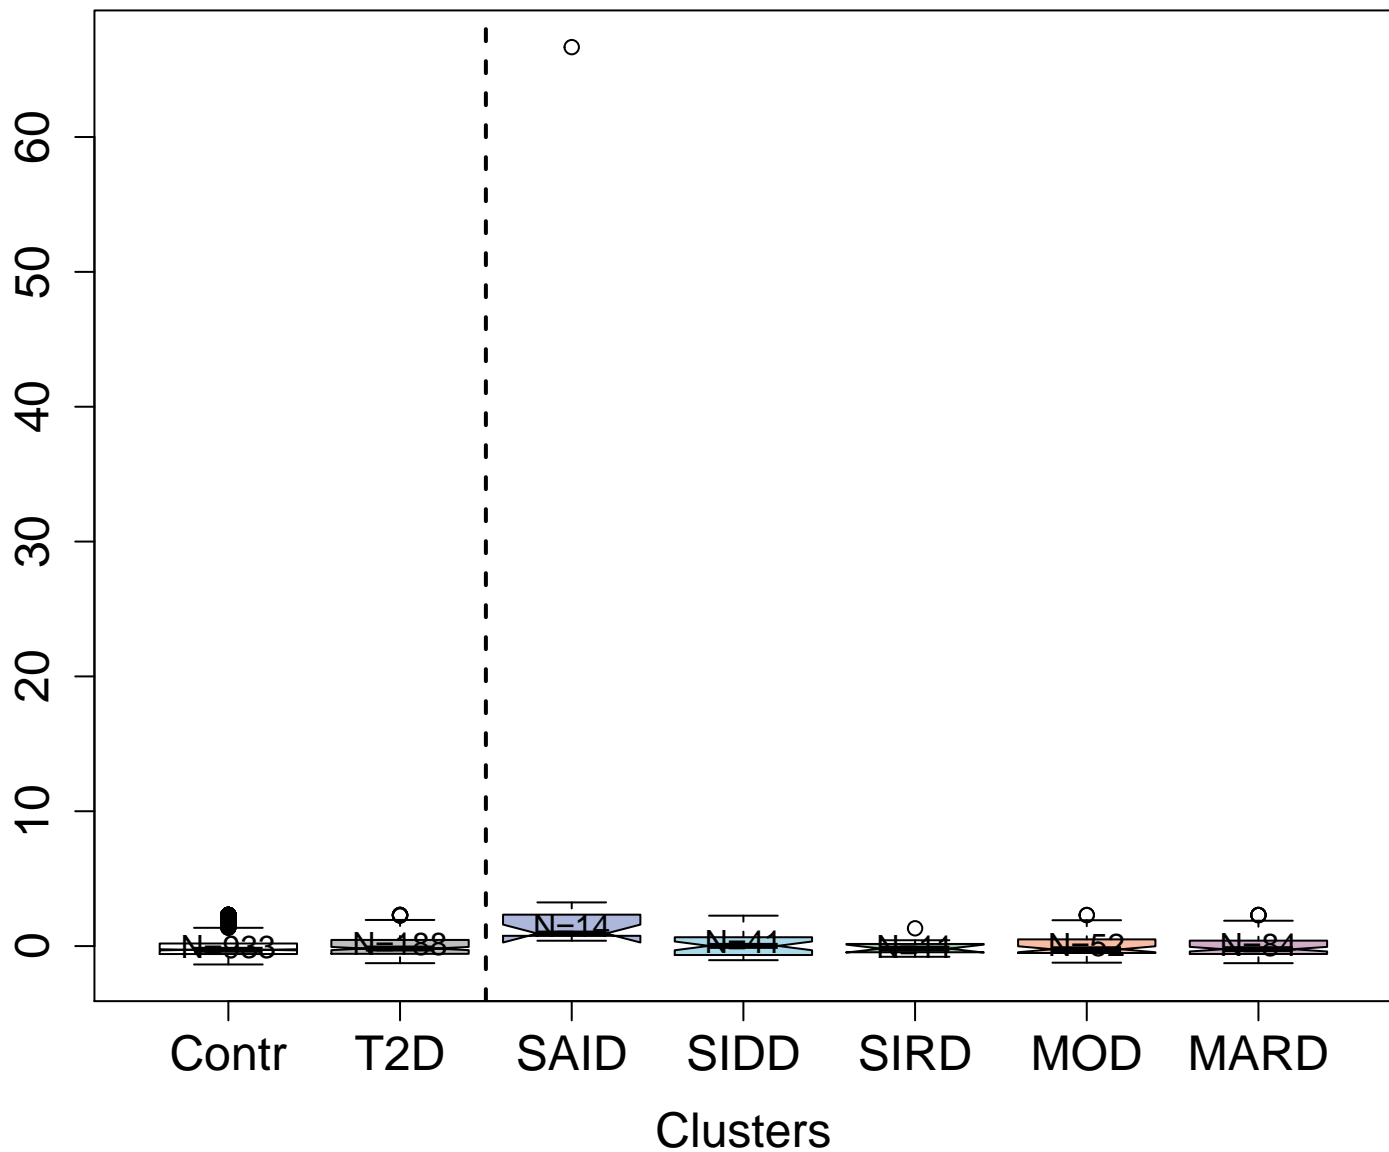

M46516 : X - 21471

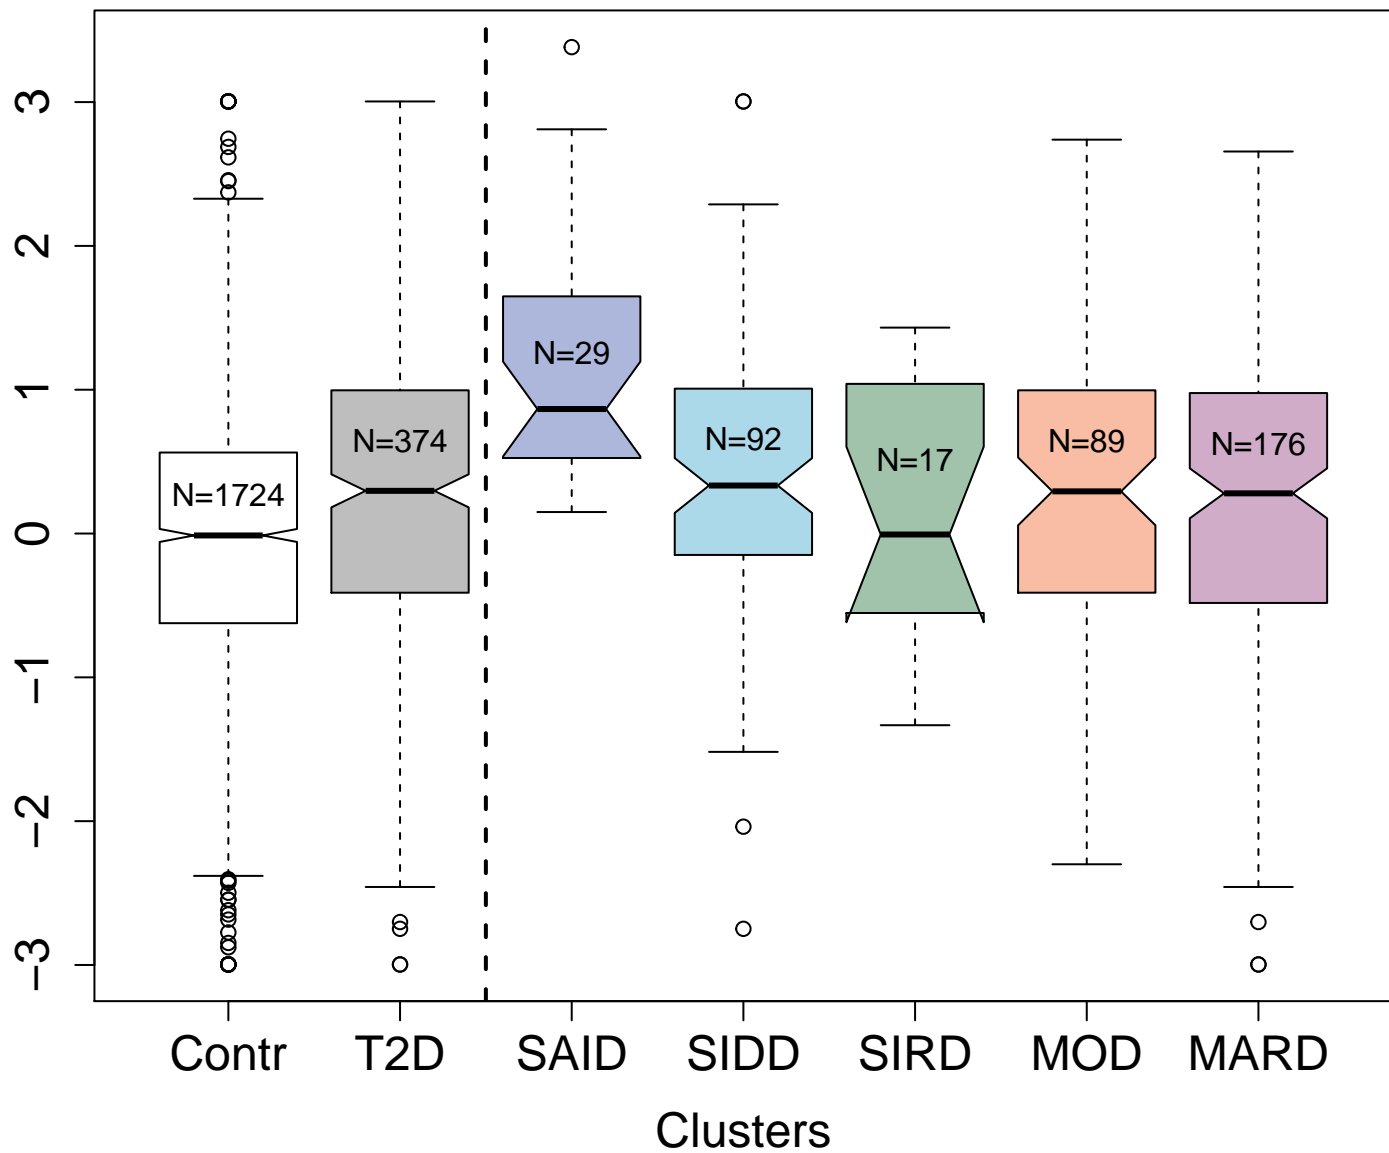



M35172 : orotidine

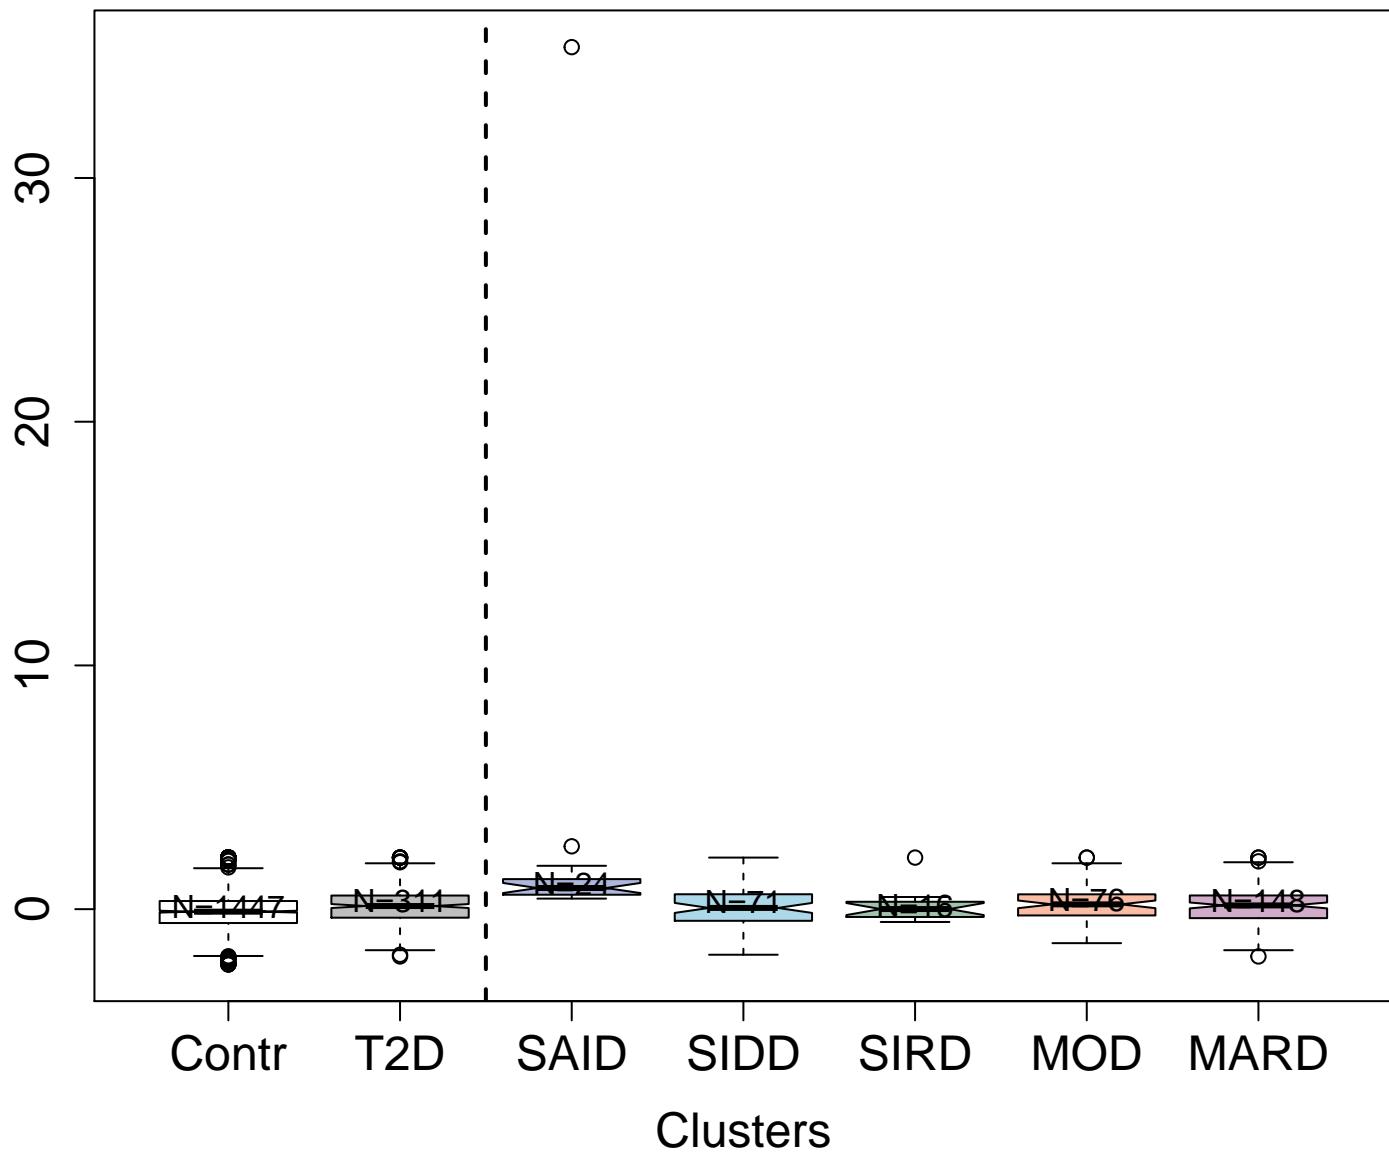

M47886 : bilirubin (E,Z or Z,E)\*

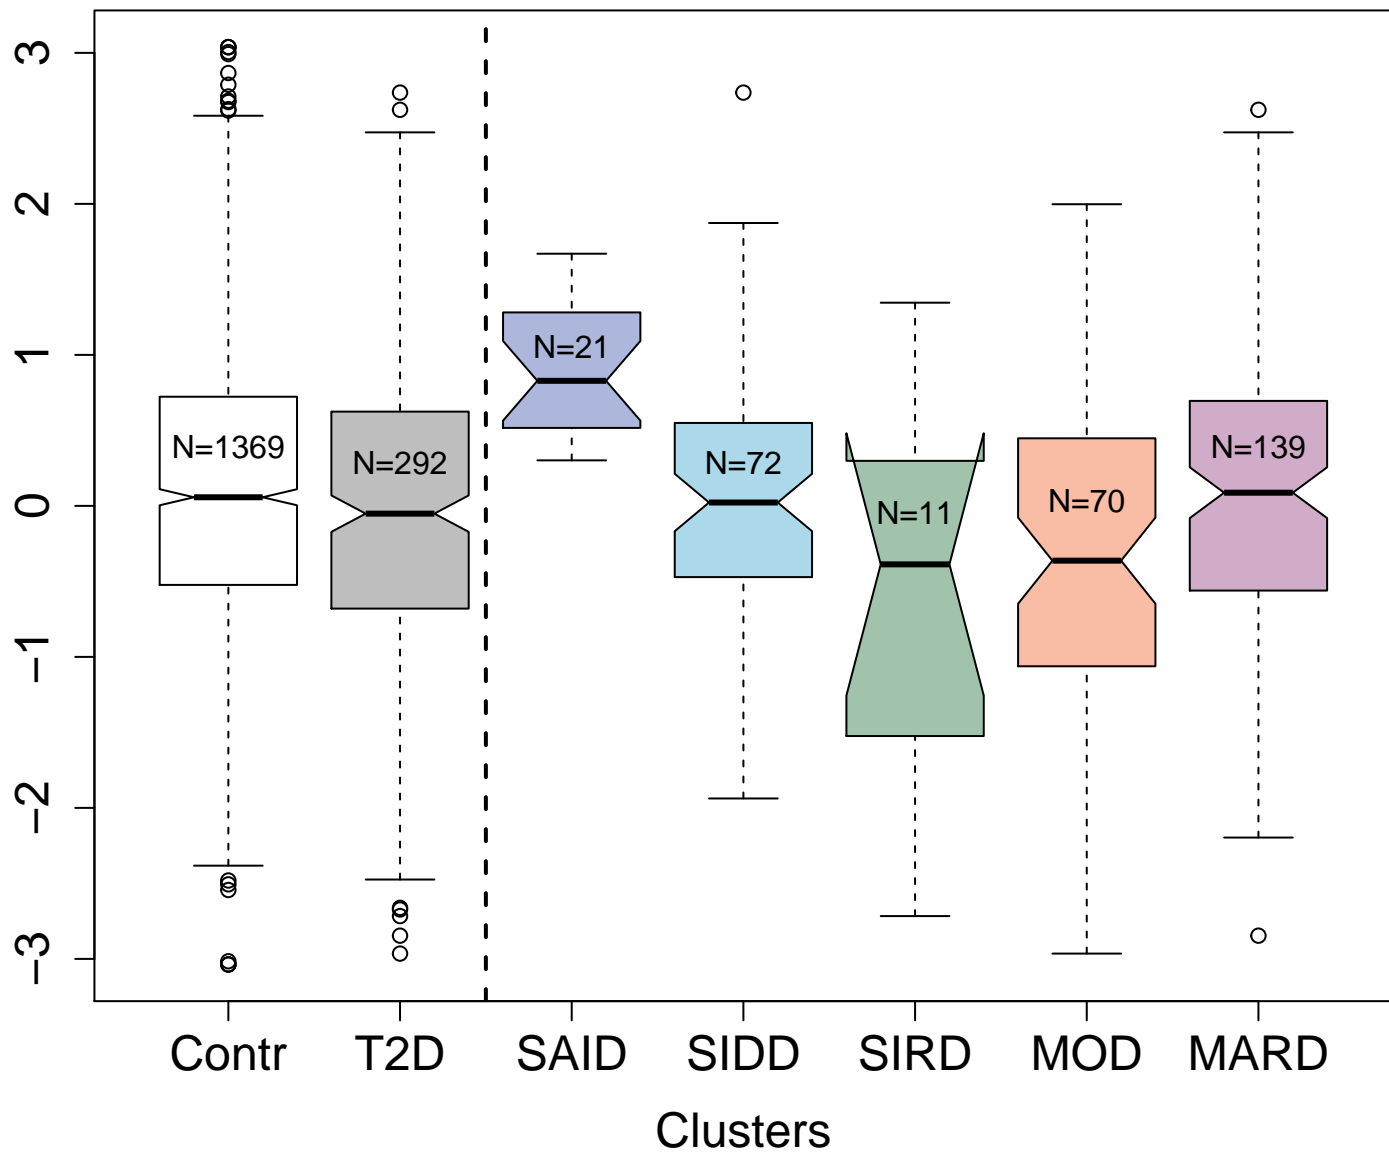

M54910 : vanillactate

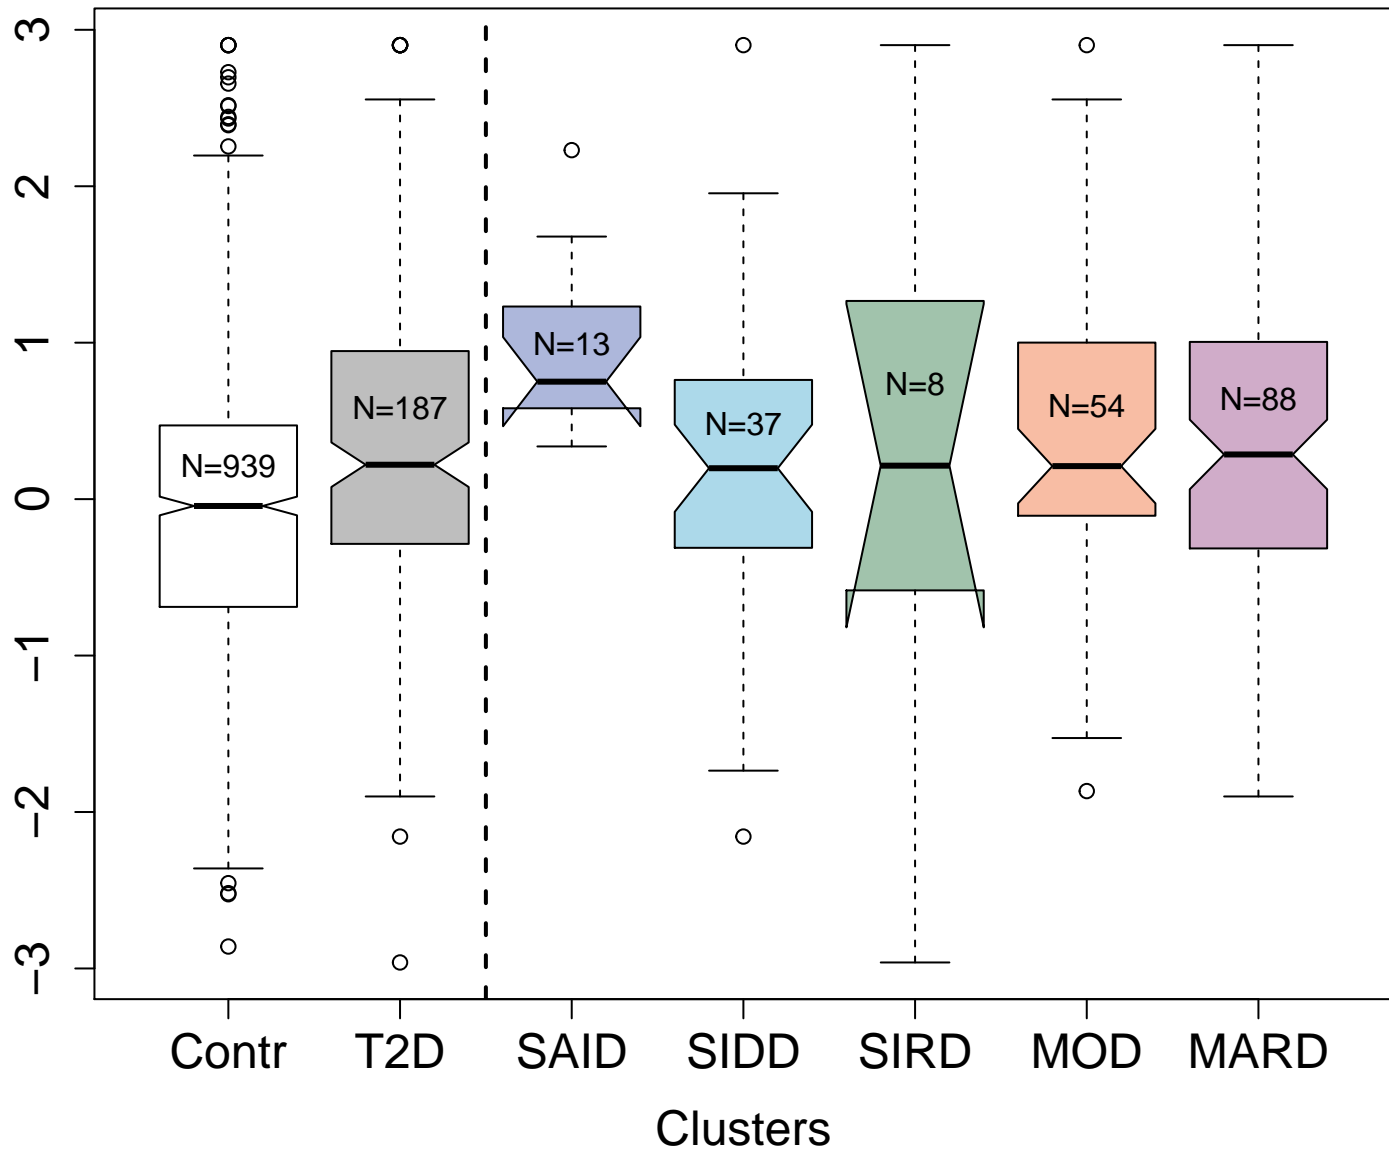

M44621 : 1-(1-enyl-oleoyl)-GPE (P-18:1)\*

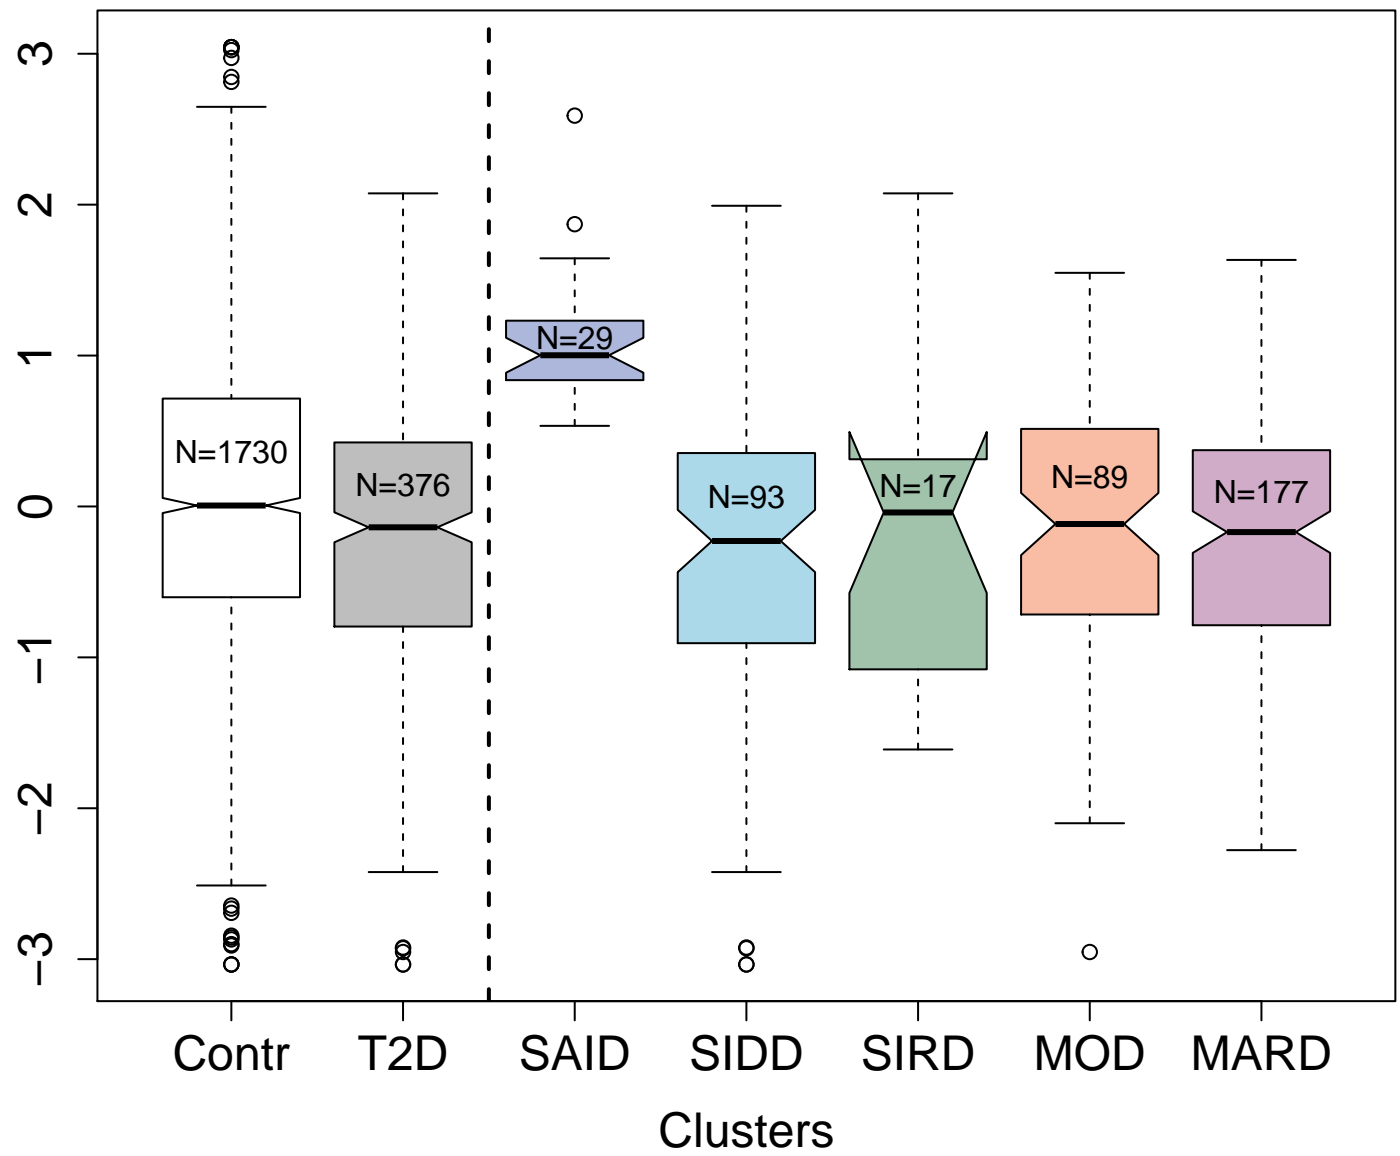

M12032 : 4-acetamidophenol

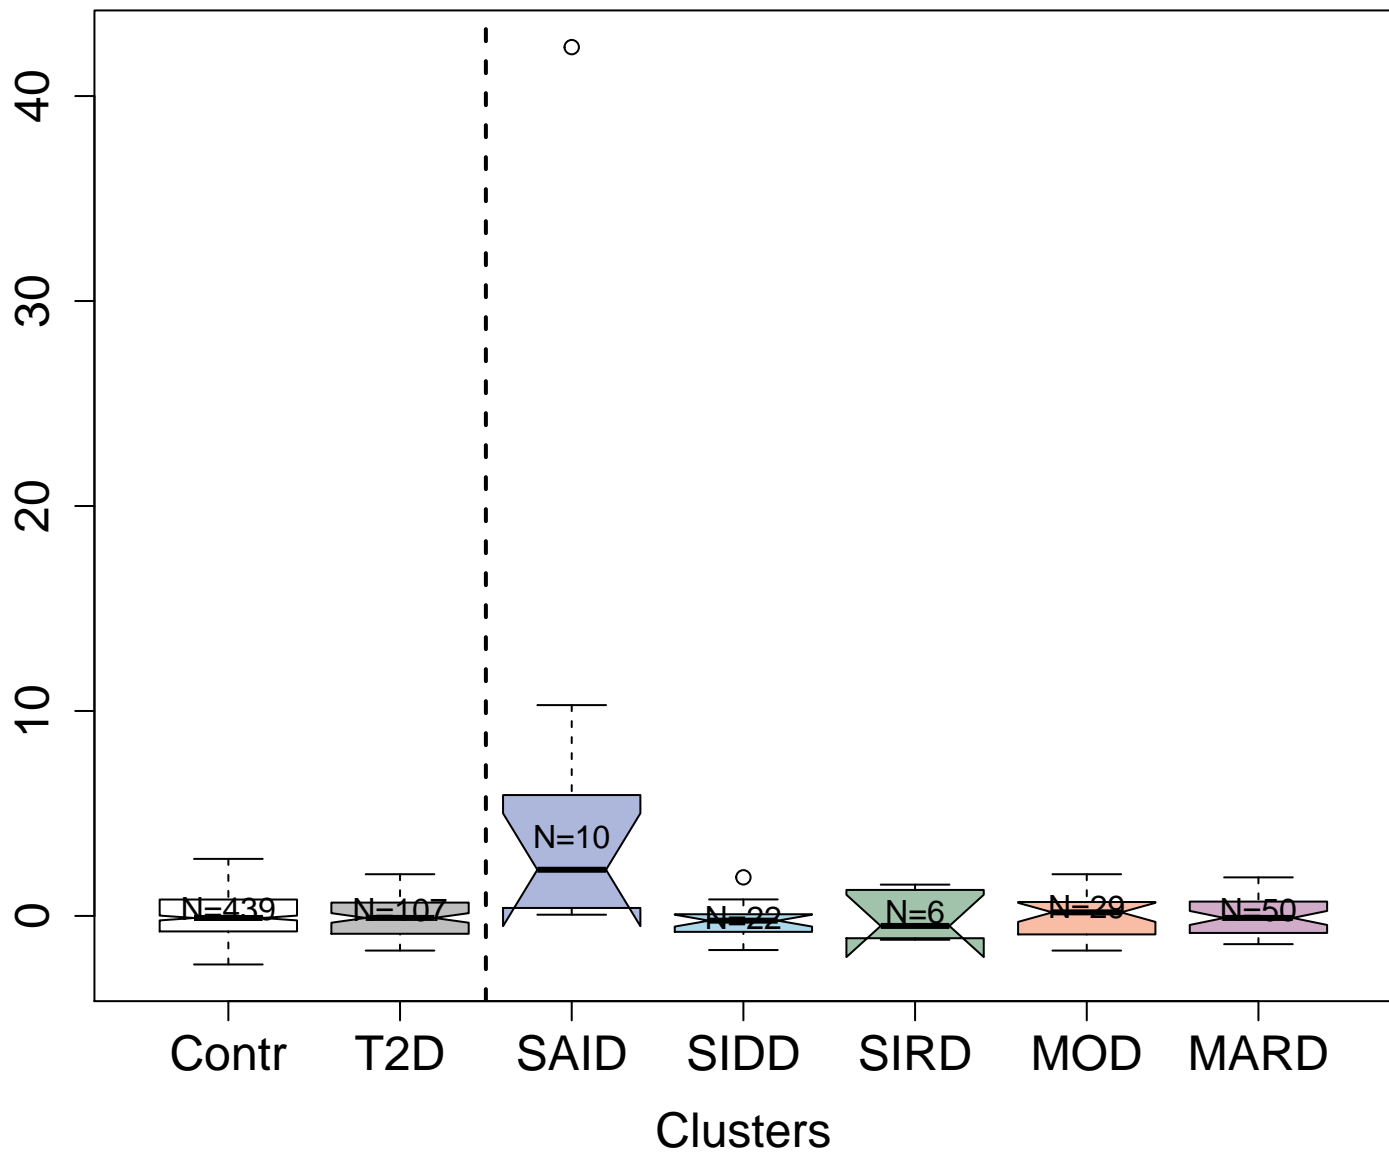

M47120 : 9-hydroxystearate

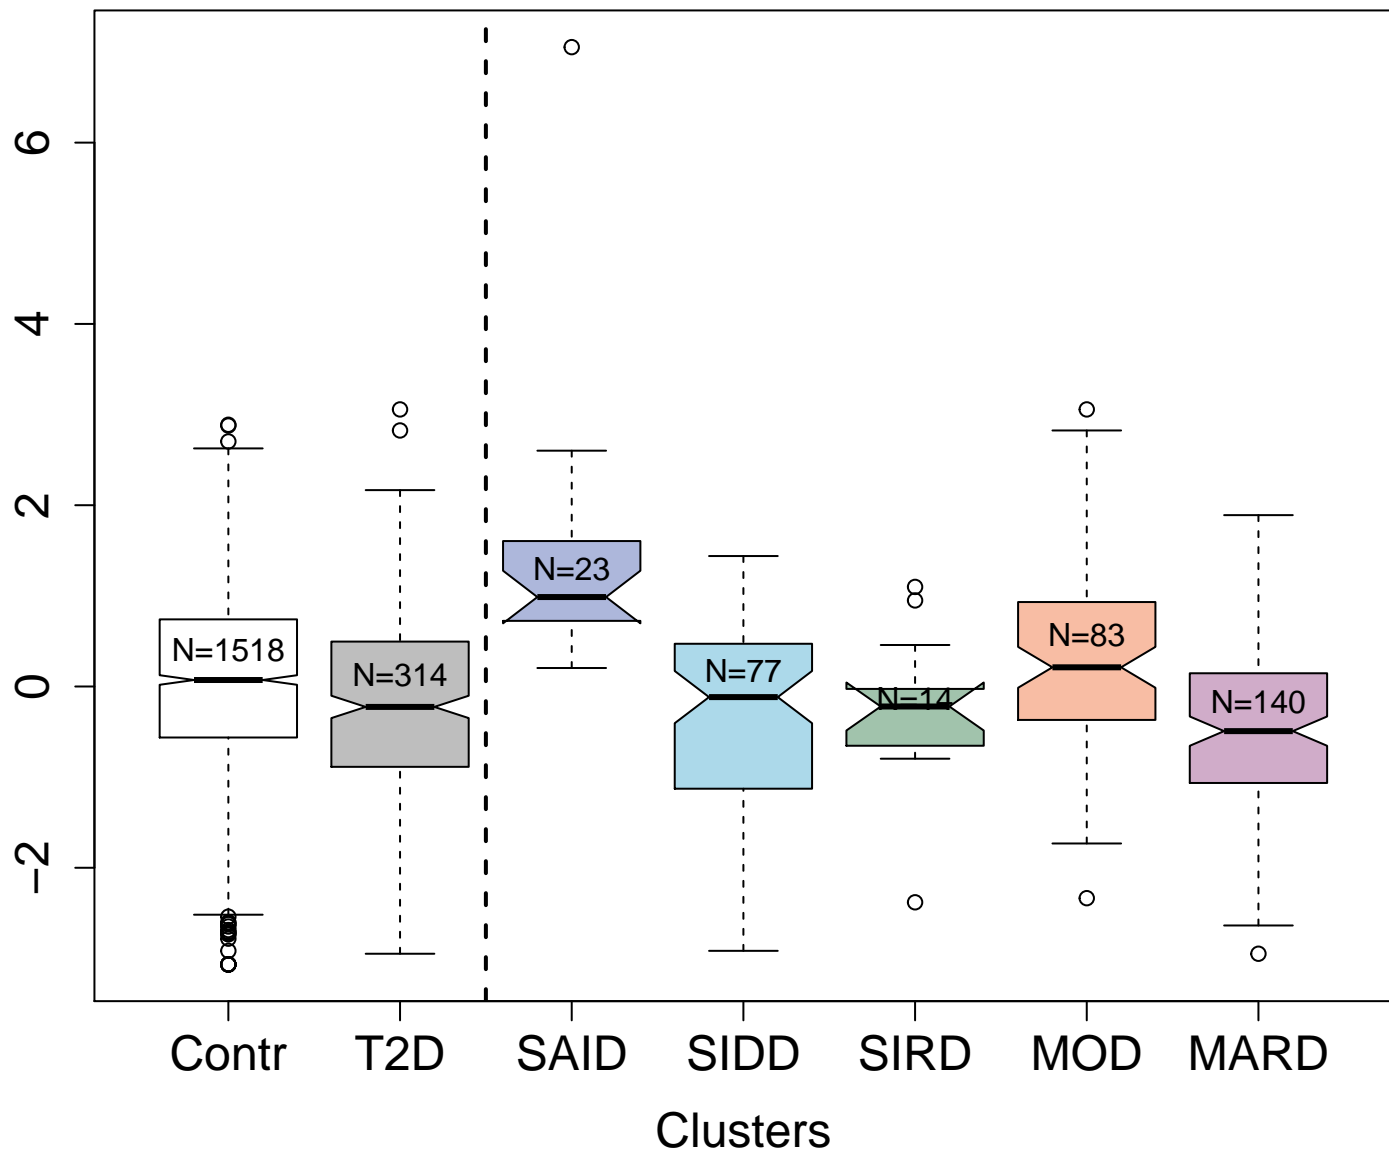

M46608 : X - 11880

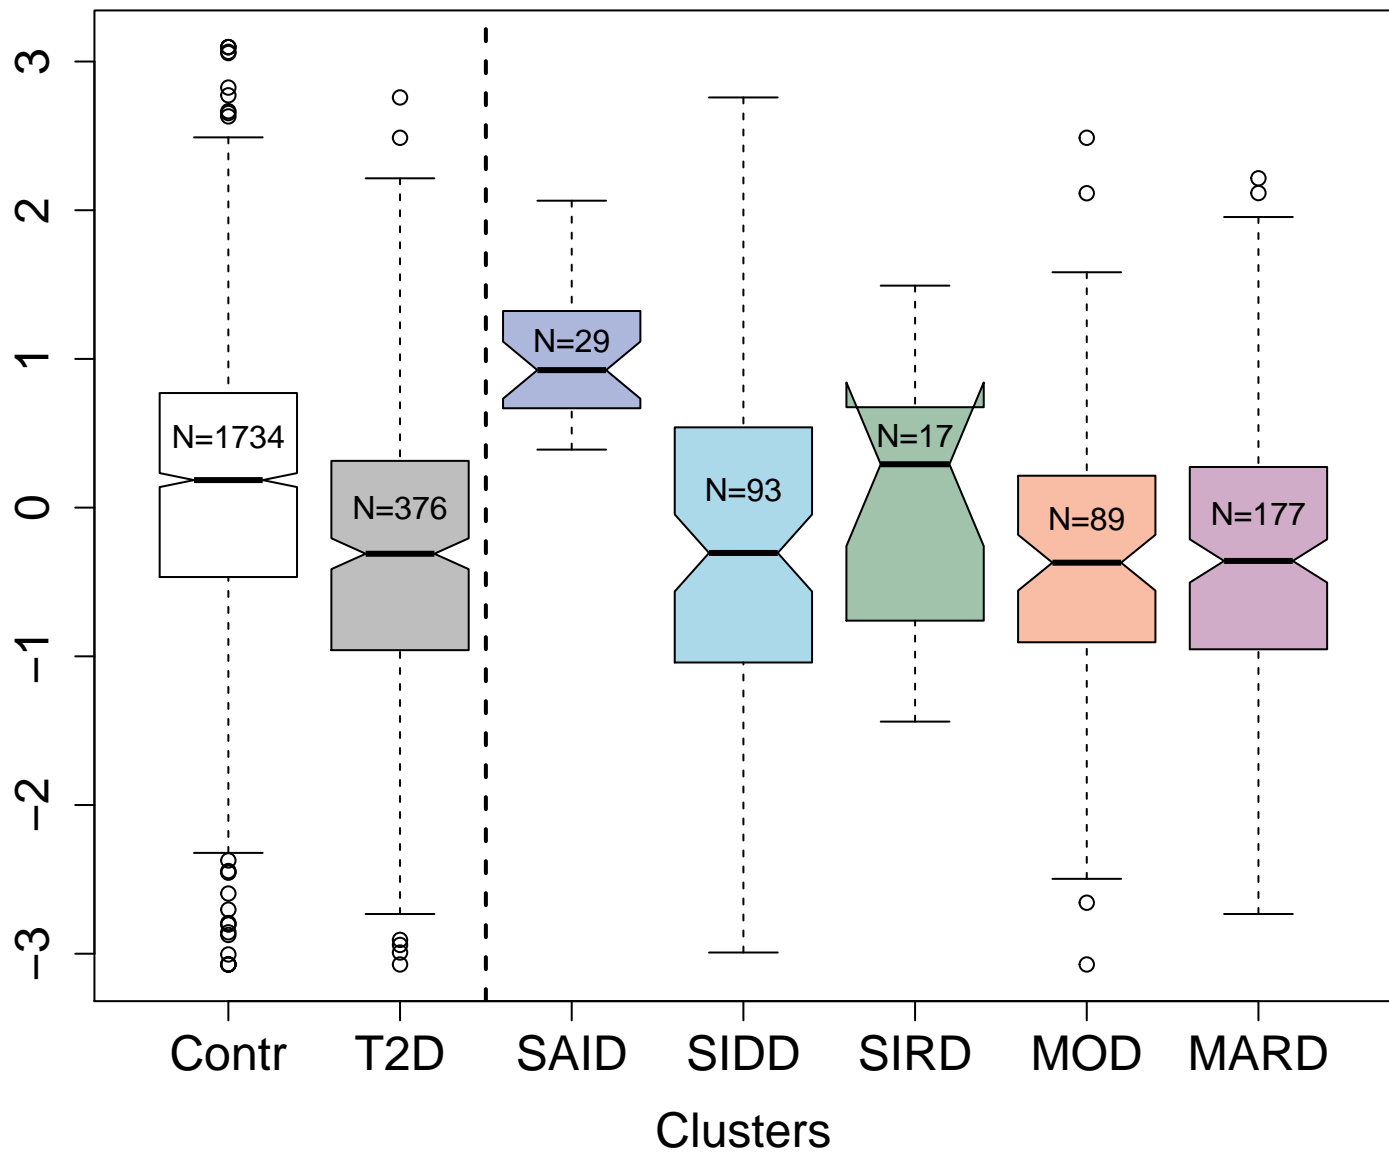

M46976 : X - 17365

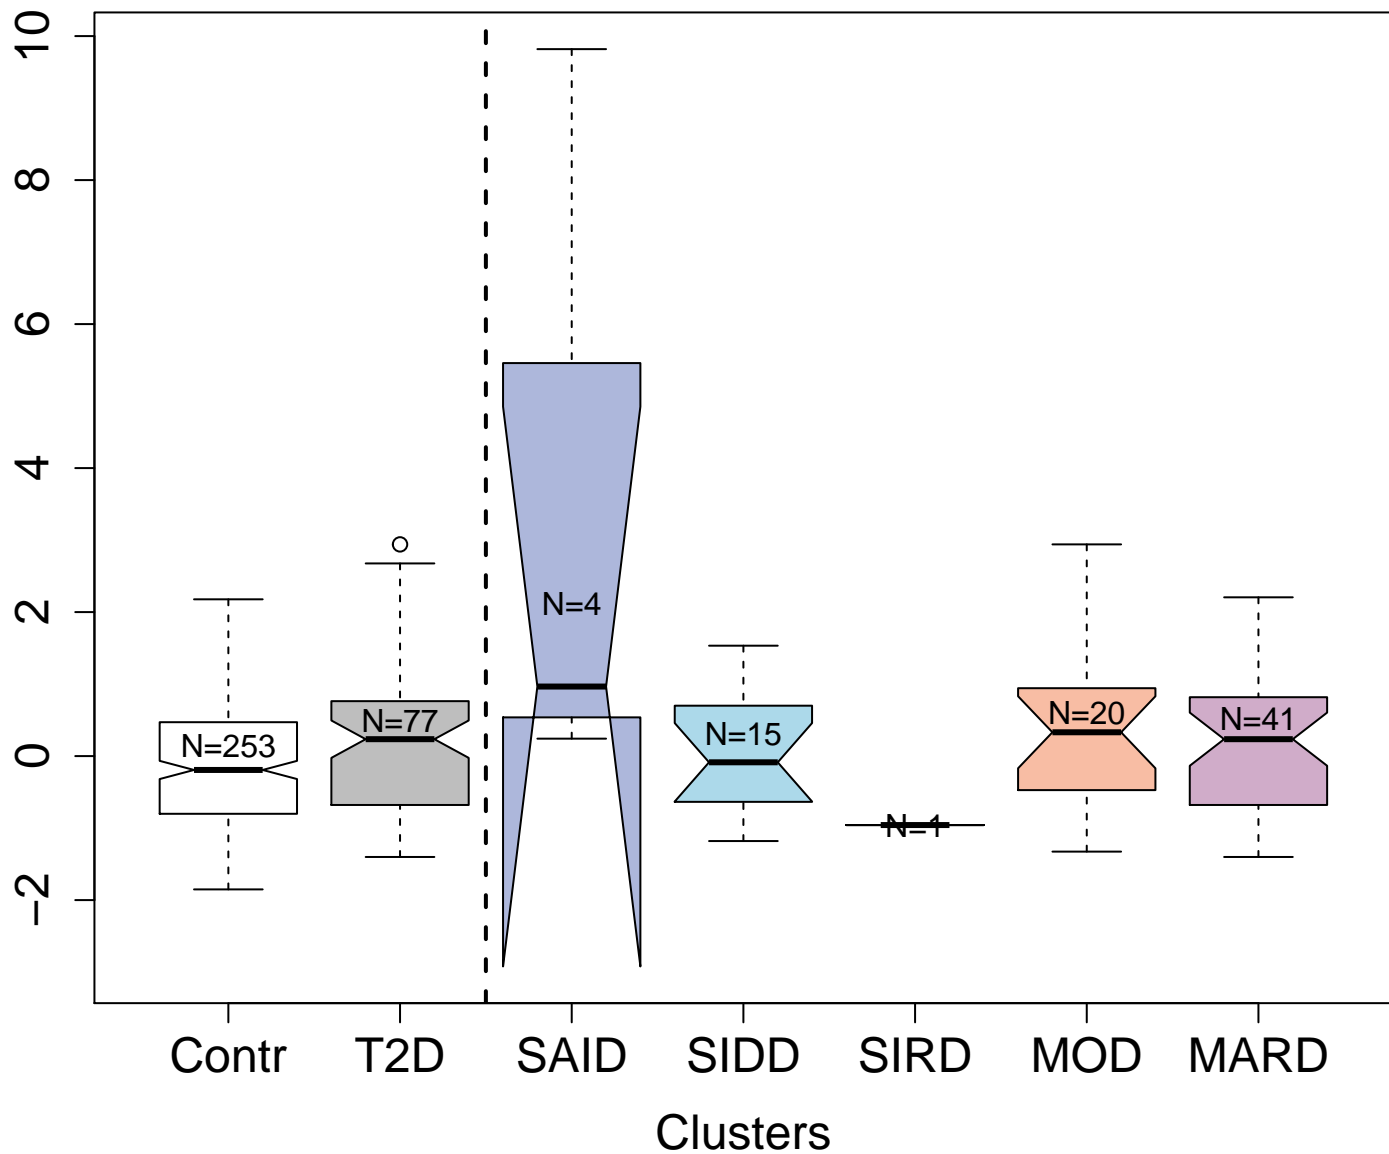



M22138 : homocitrulline

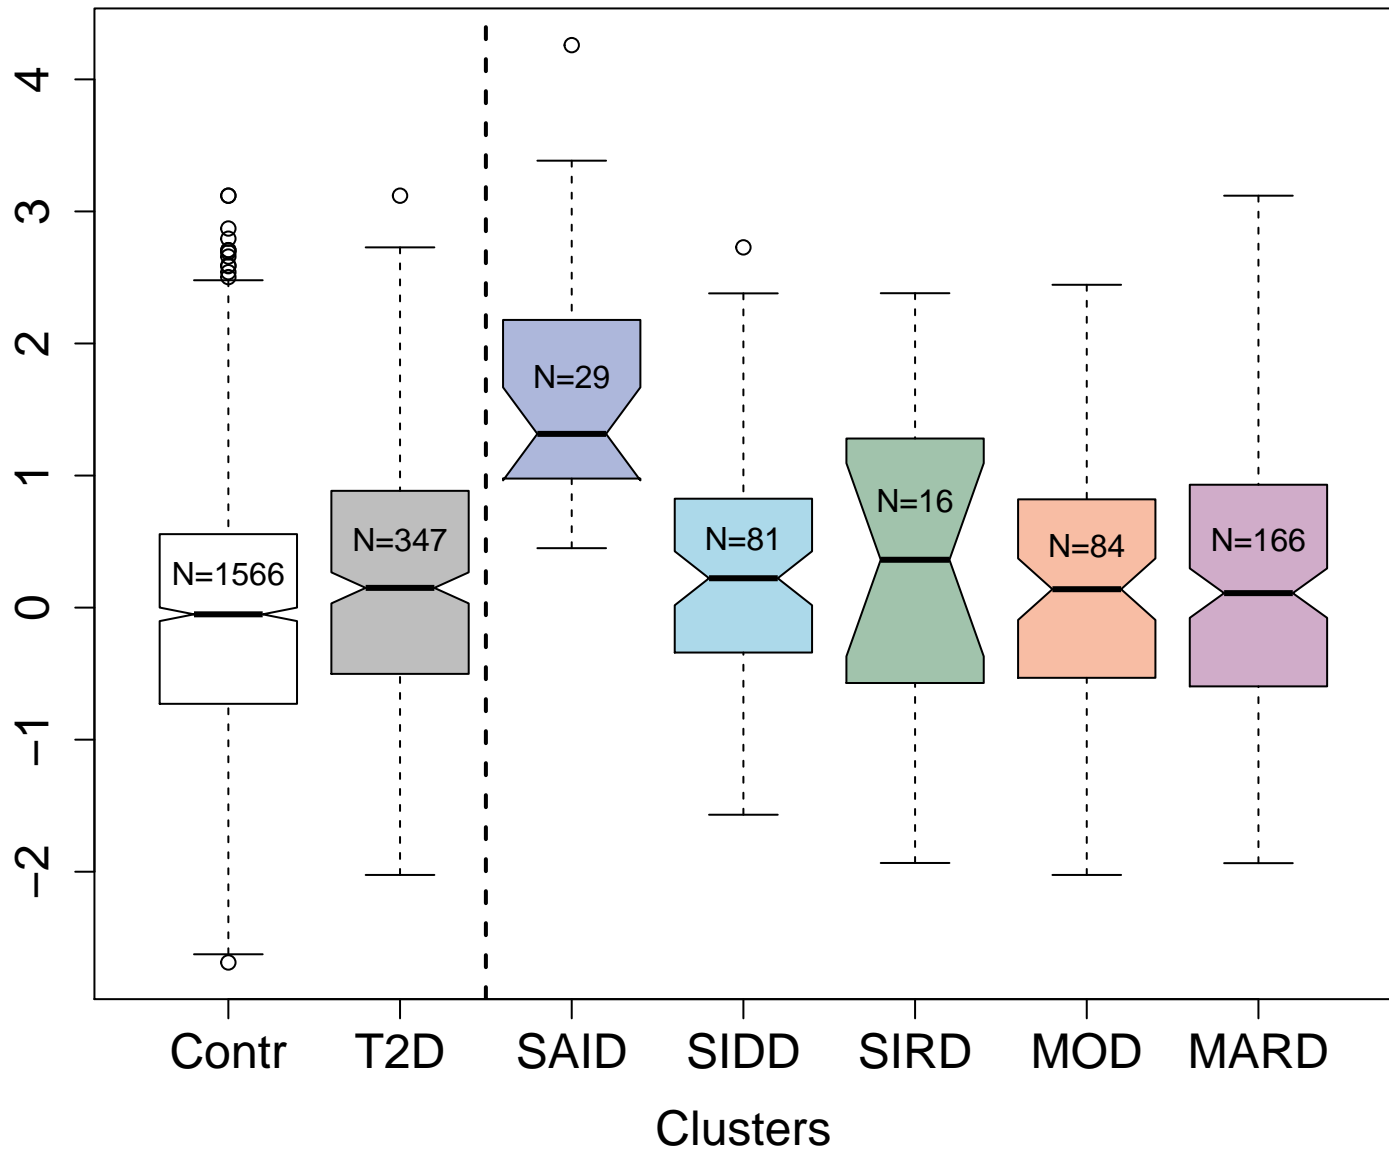

M2125 : taurine

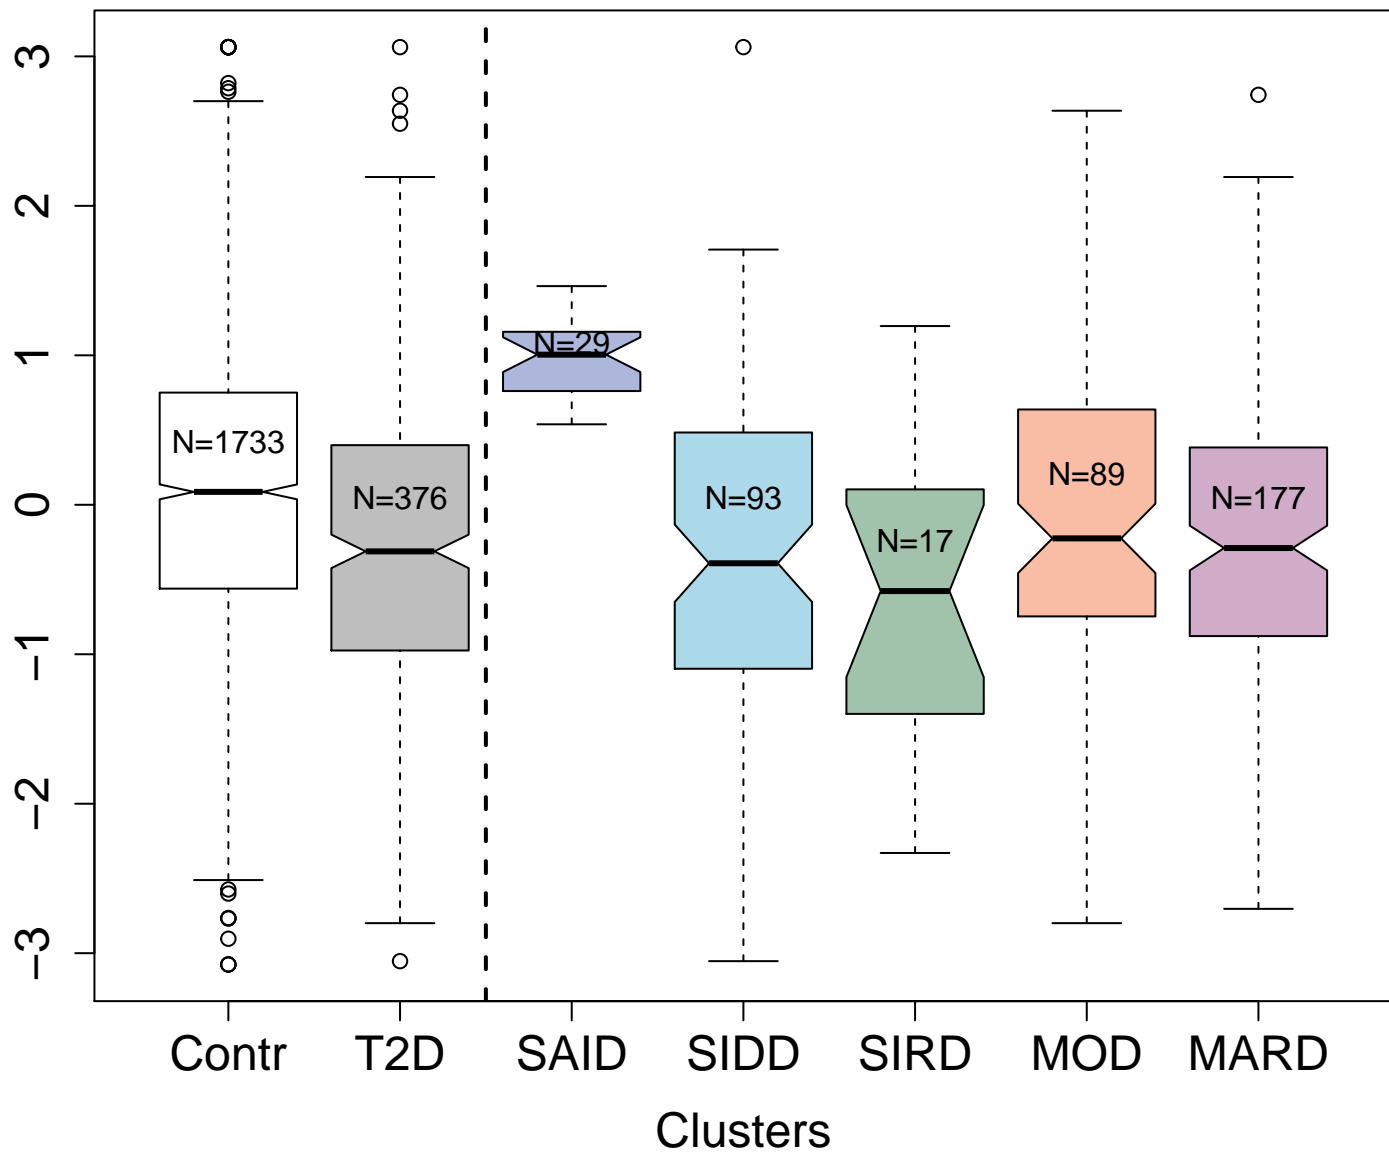

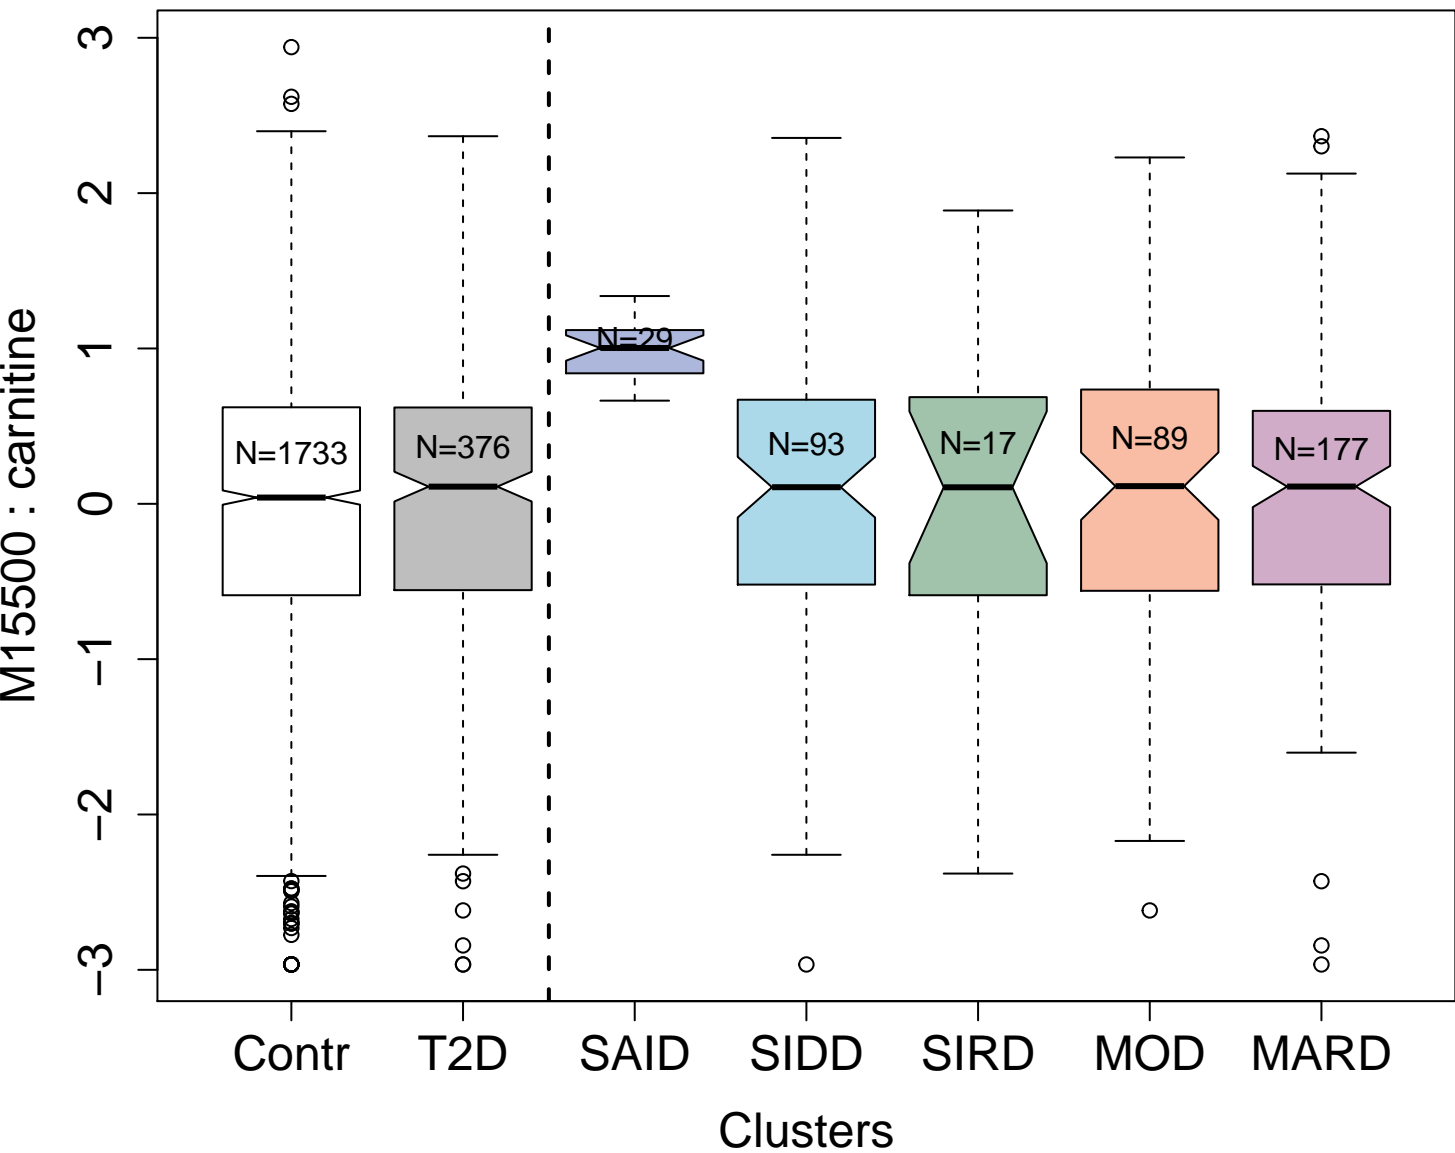

M18476 : glycocholate

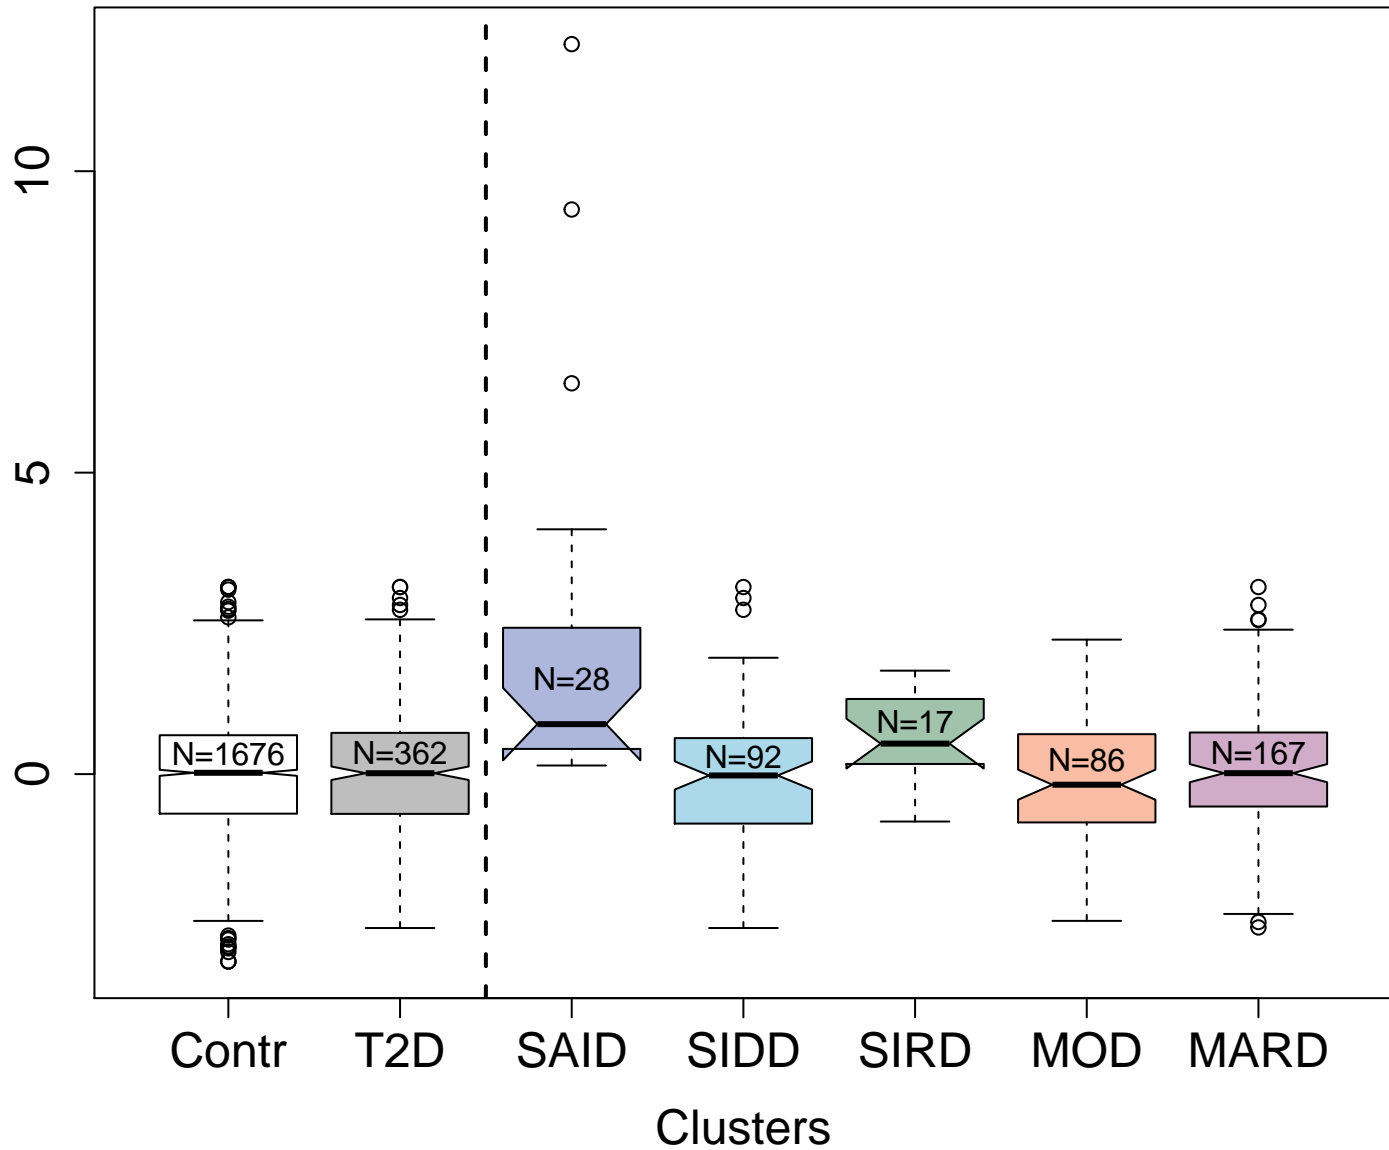

M53231 : thioproline

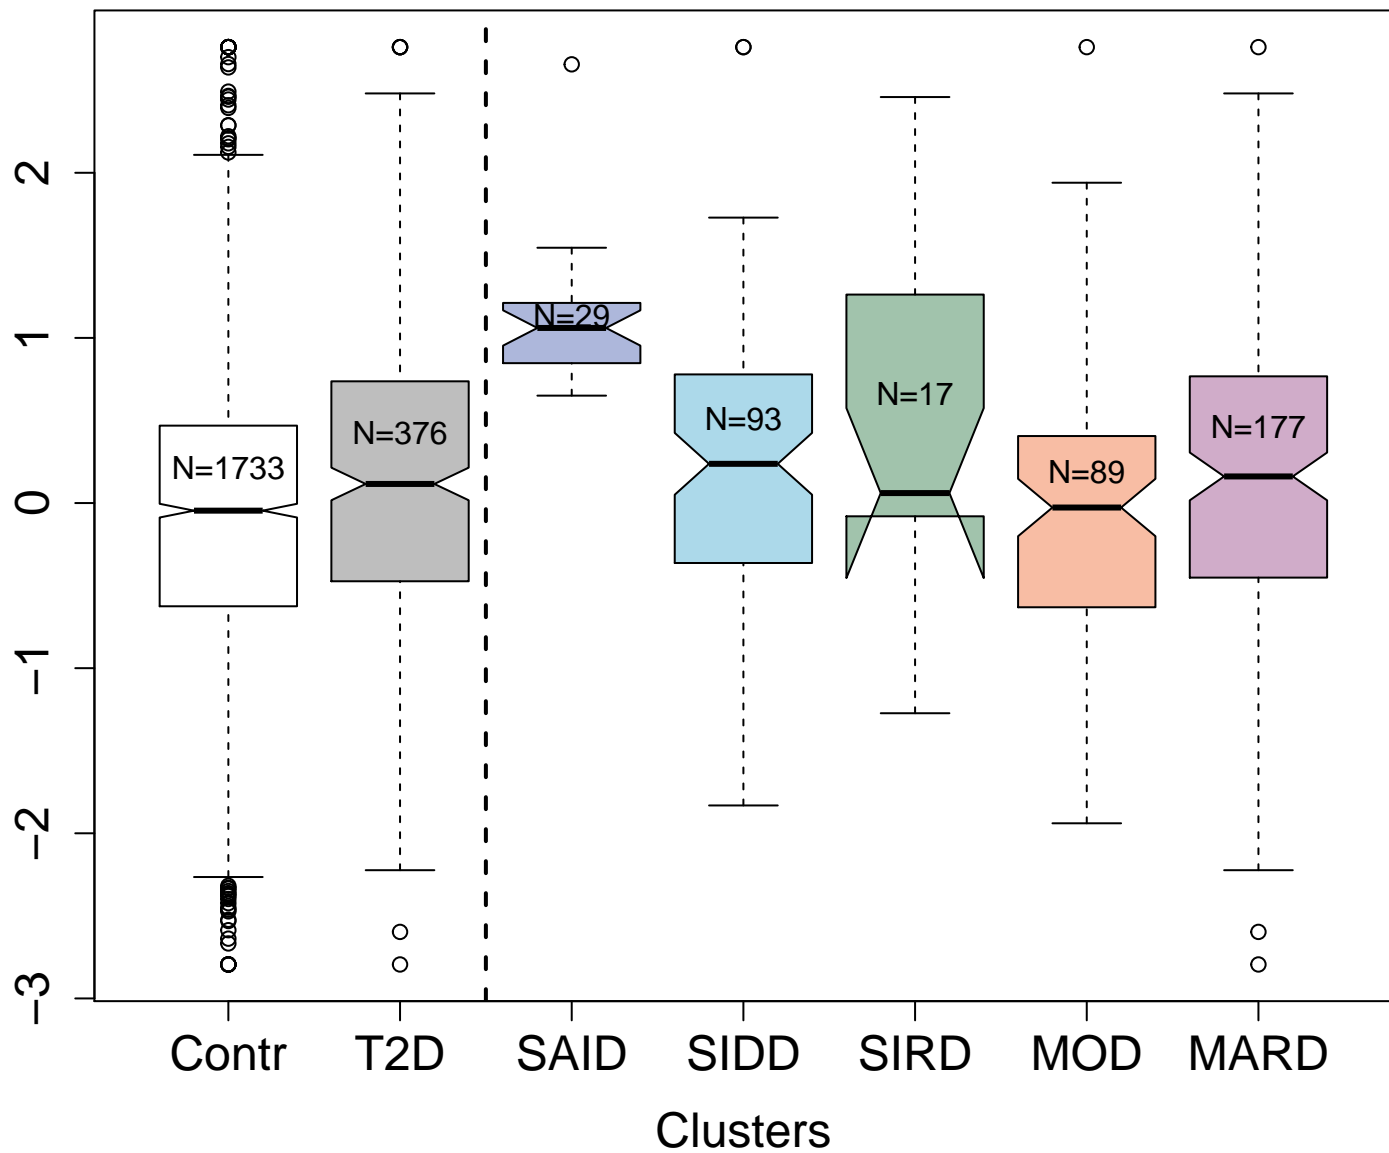

M63590 : ascorbic acid 2-sulfate

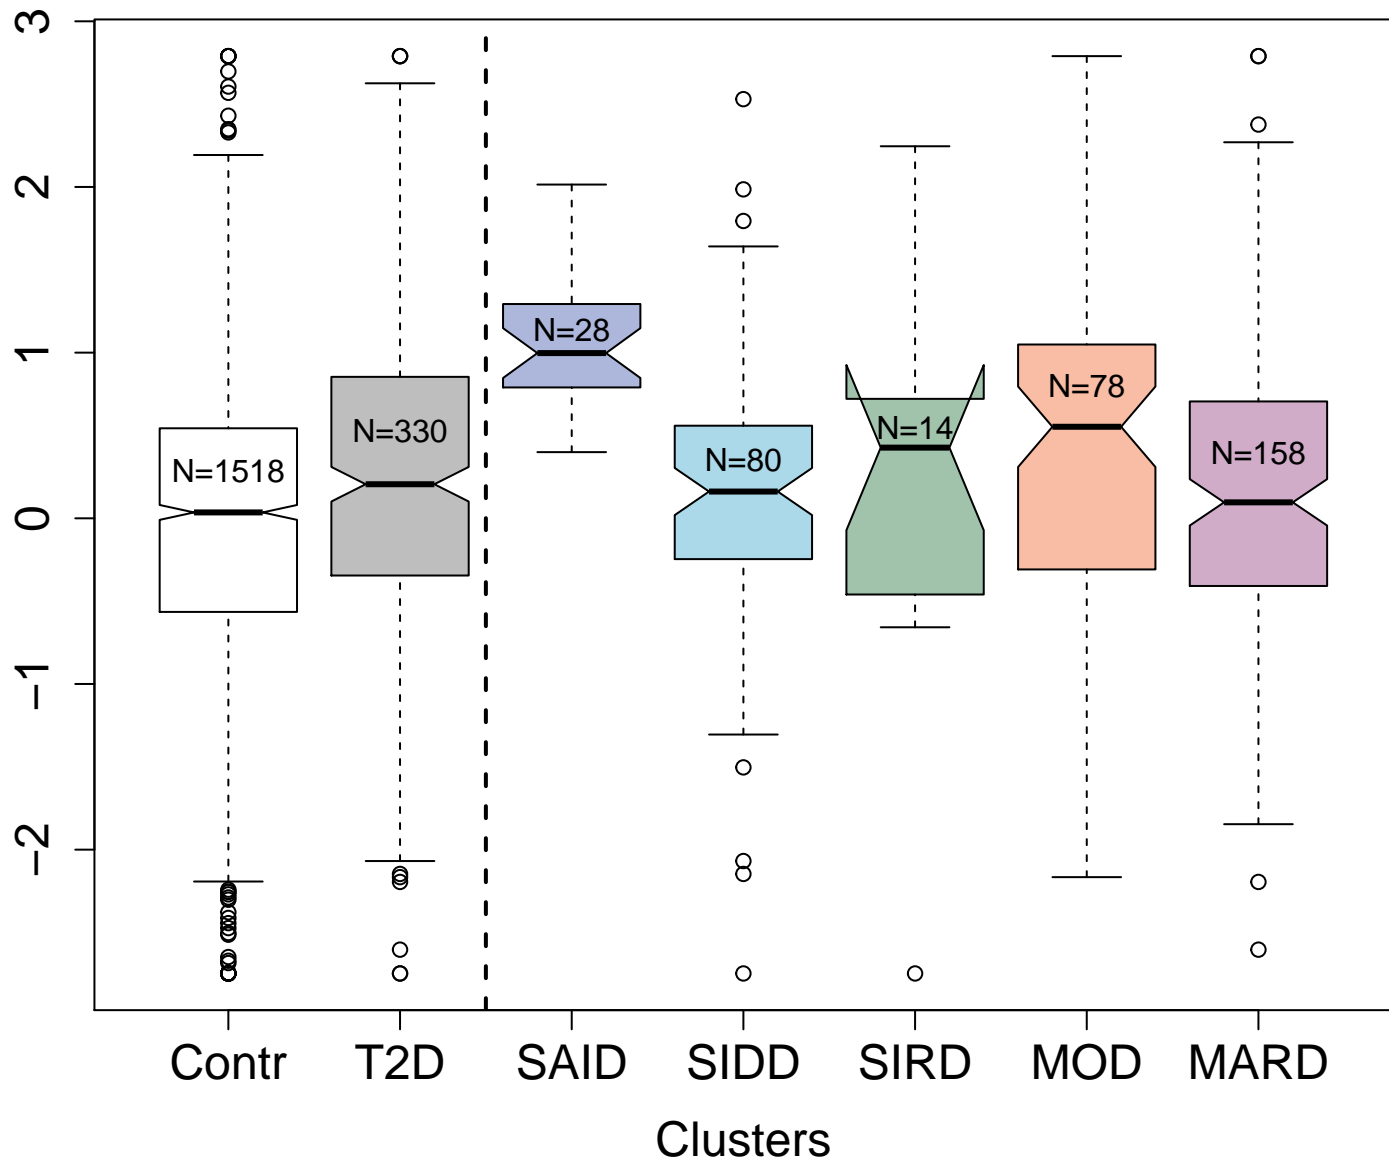

M57659 : N-palmitoylserine

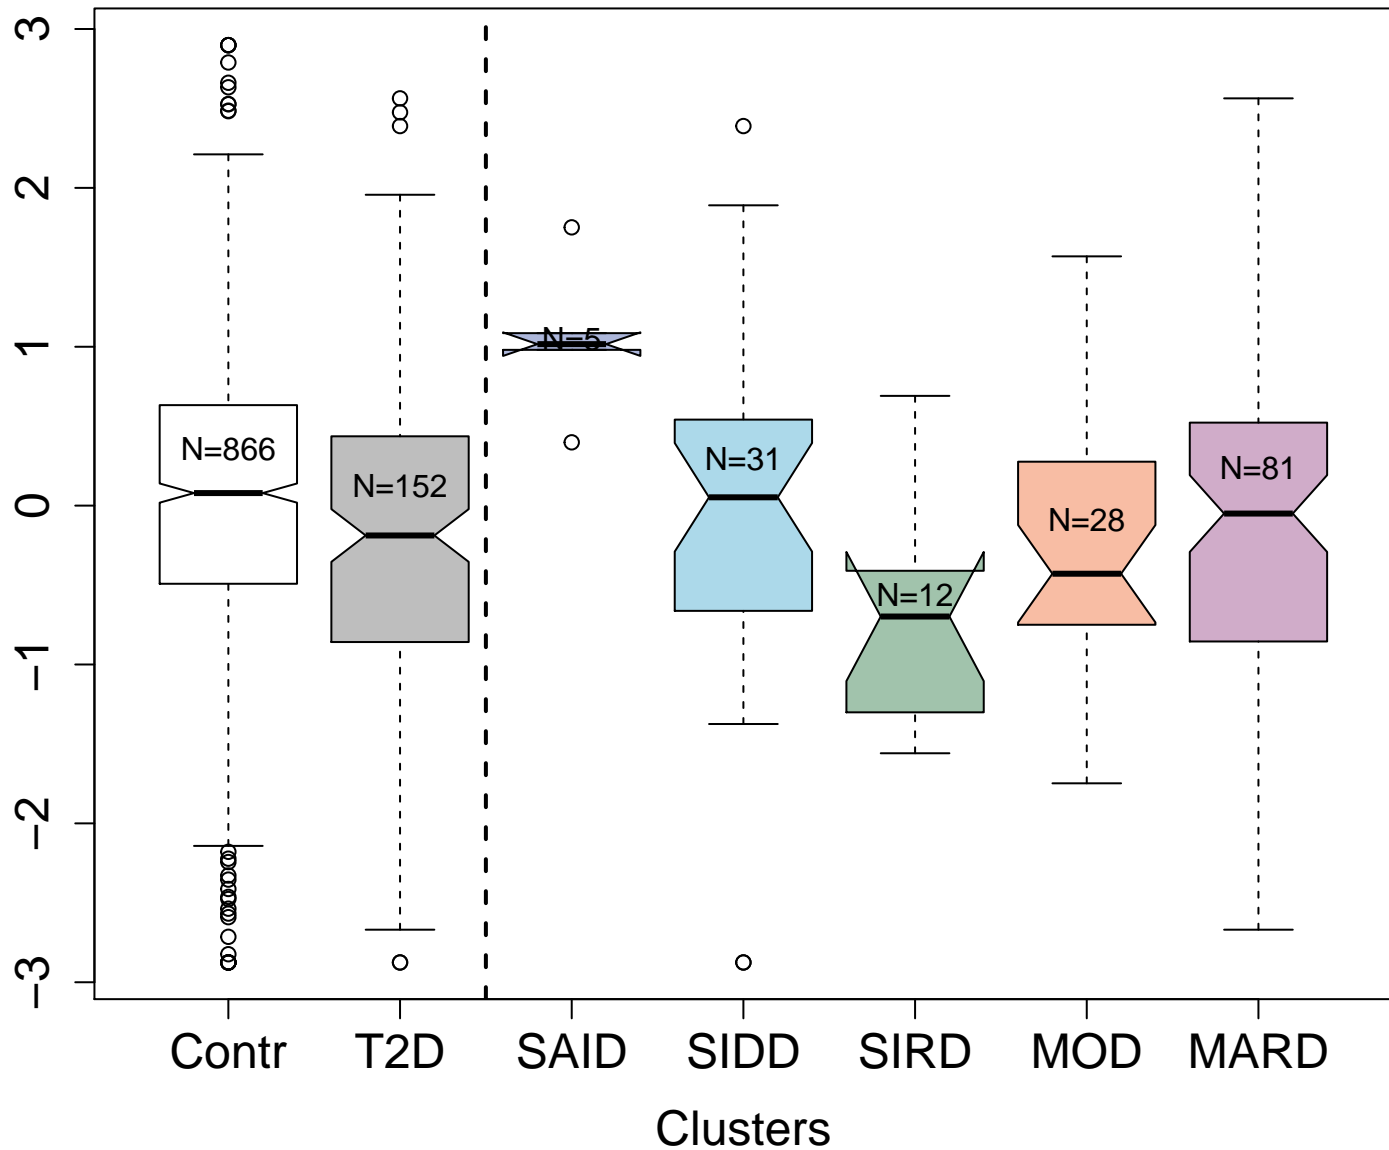

M43333 : carboxyibuprofen

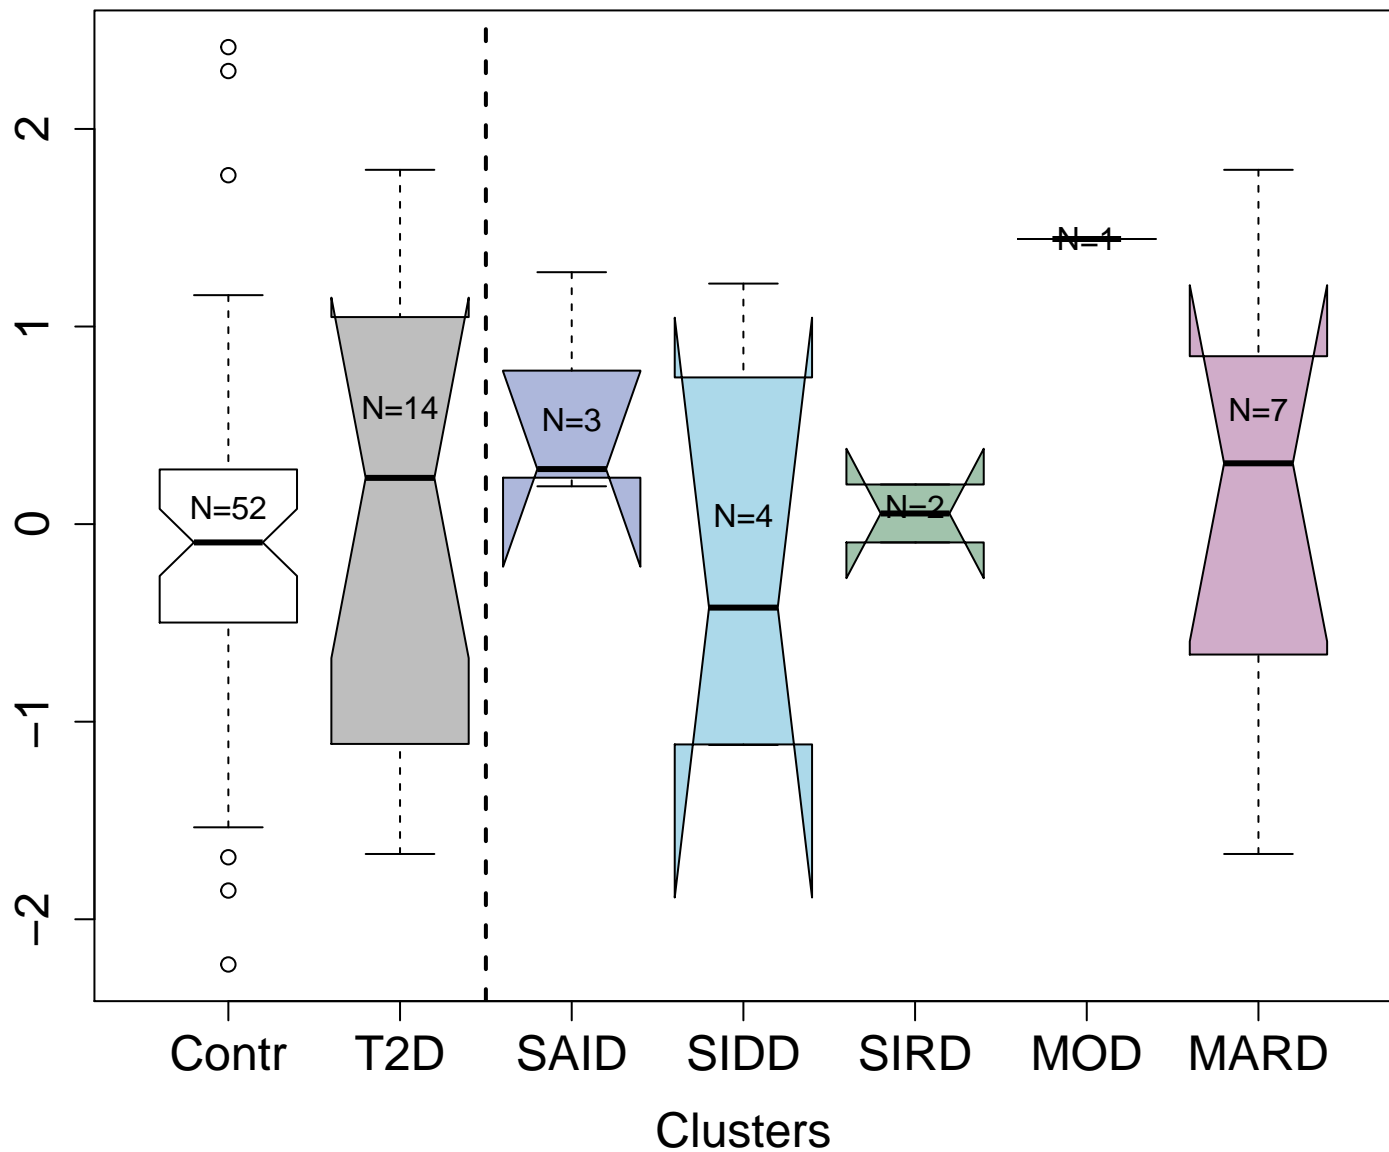



M19260 : 1-oleoyl-GPS (18:1)

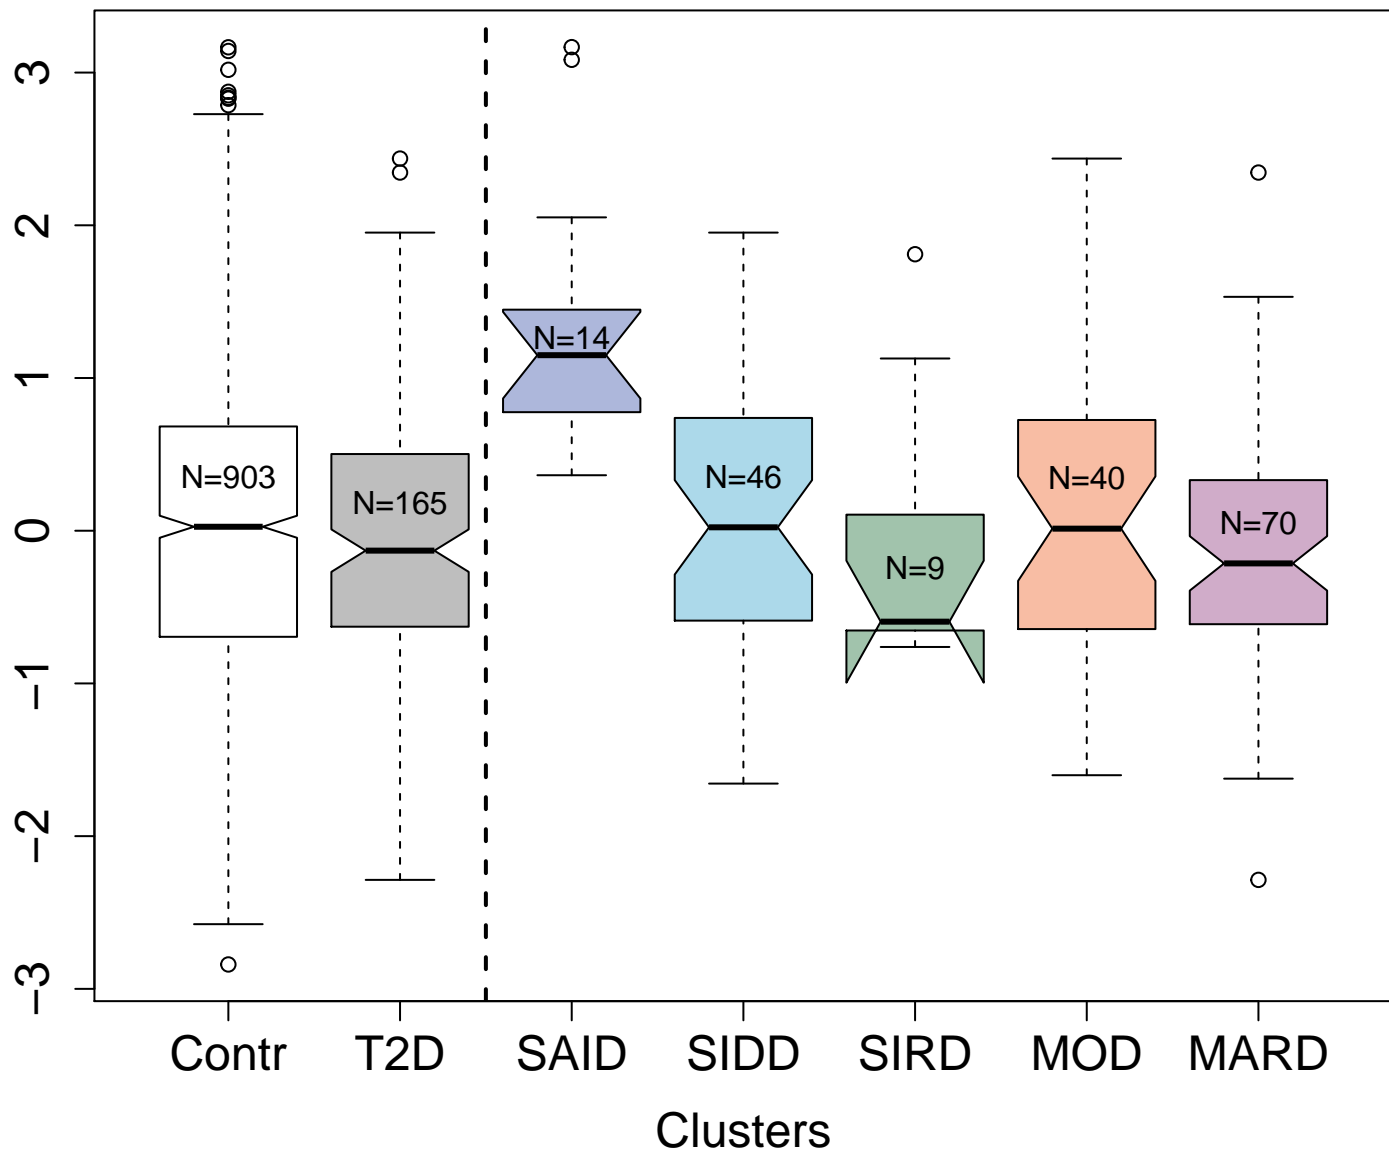

M62527 : lithocholic acid sulfate (2)

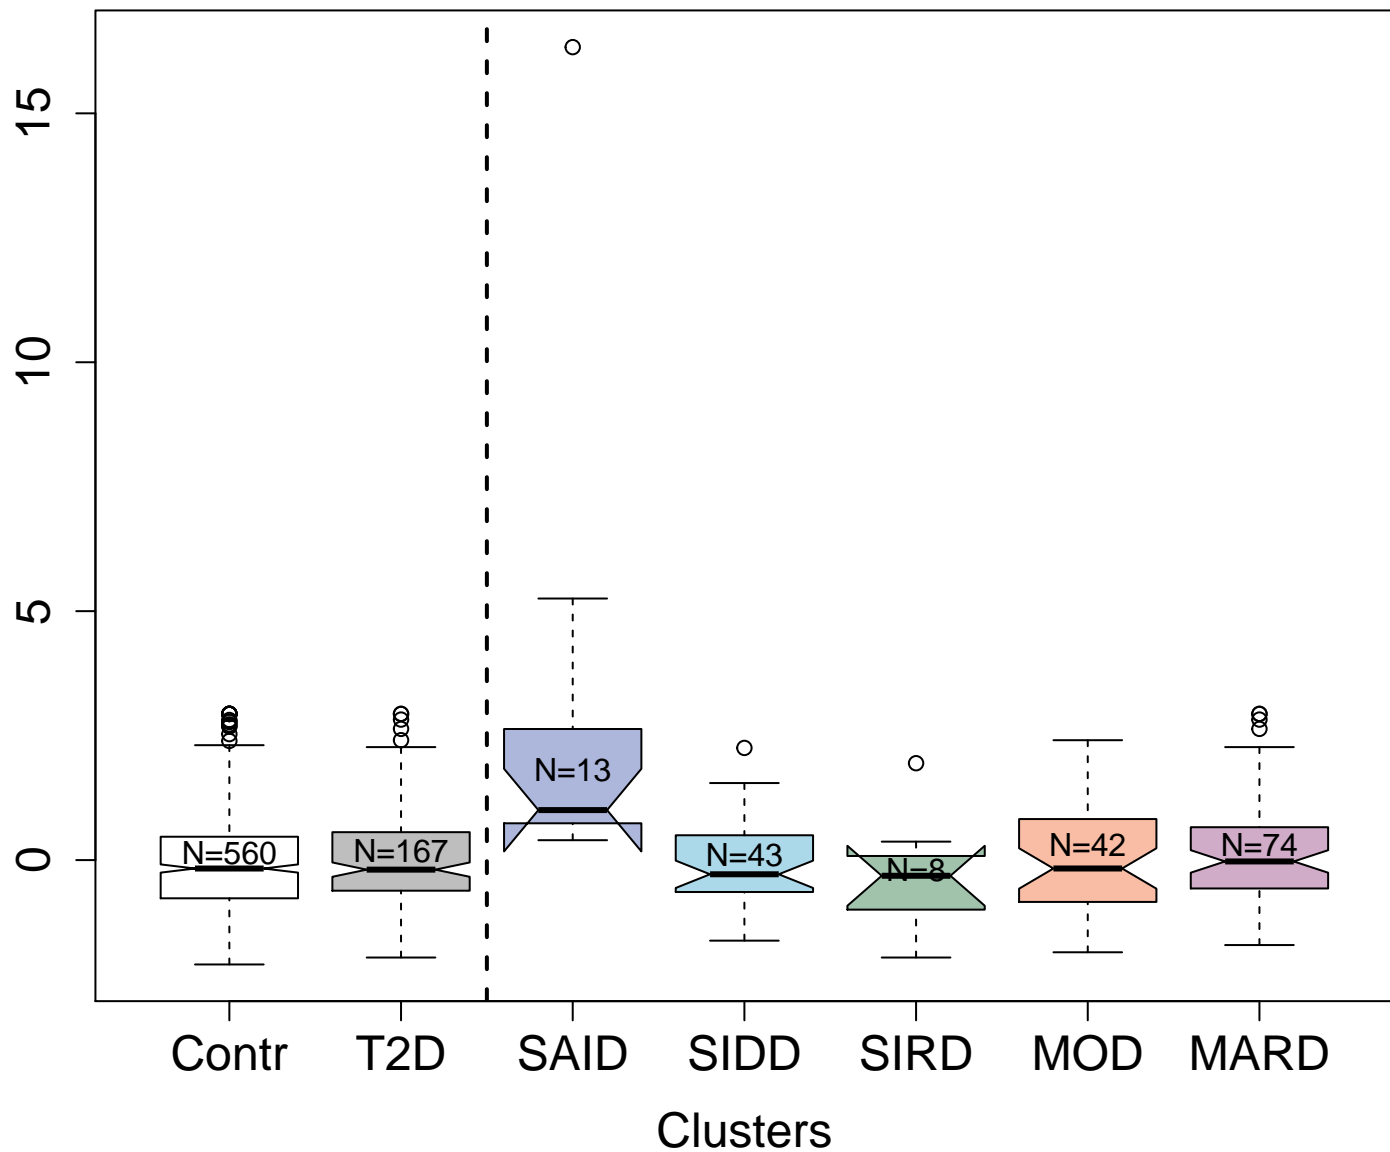

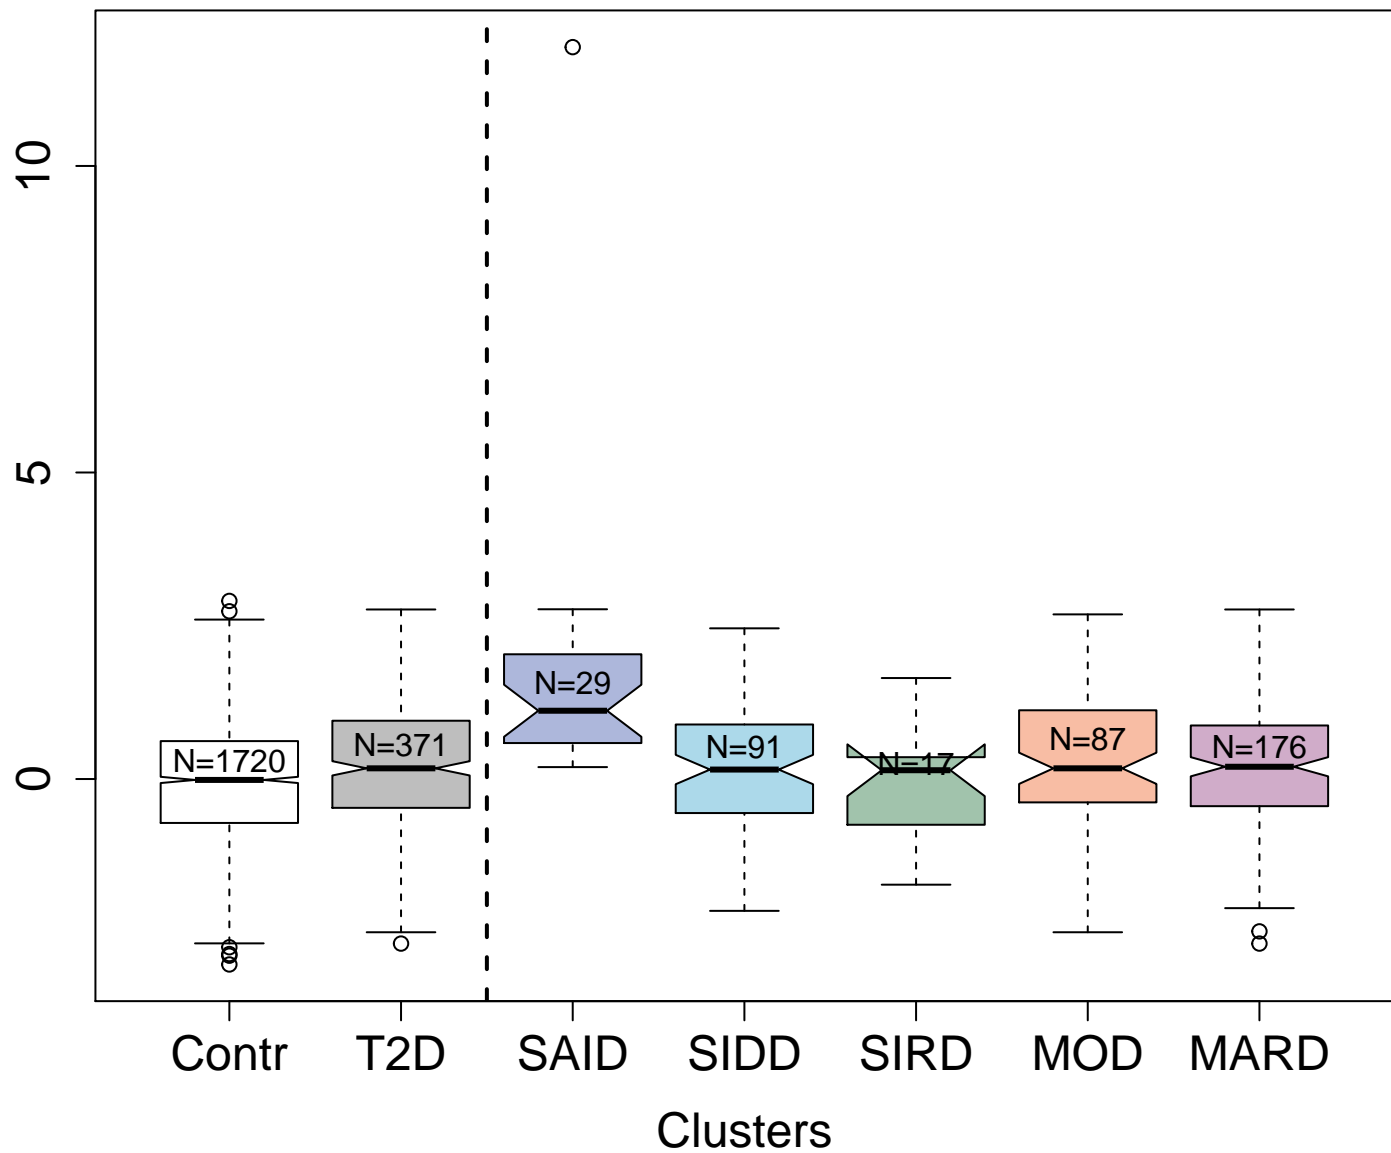

M52914 : 5-hydroxyindole sulfate

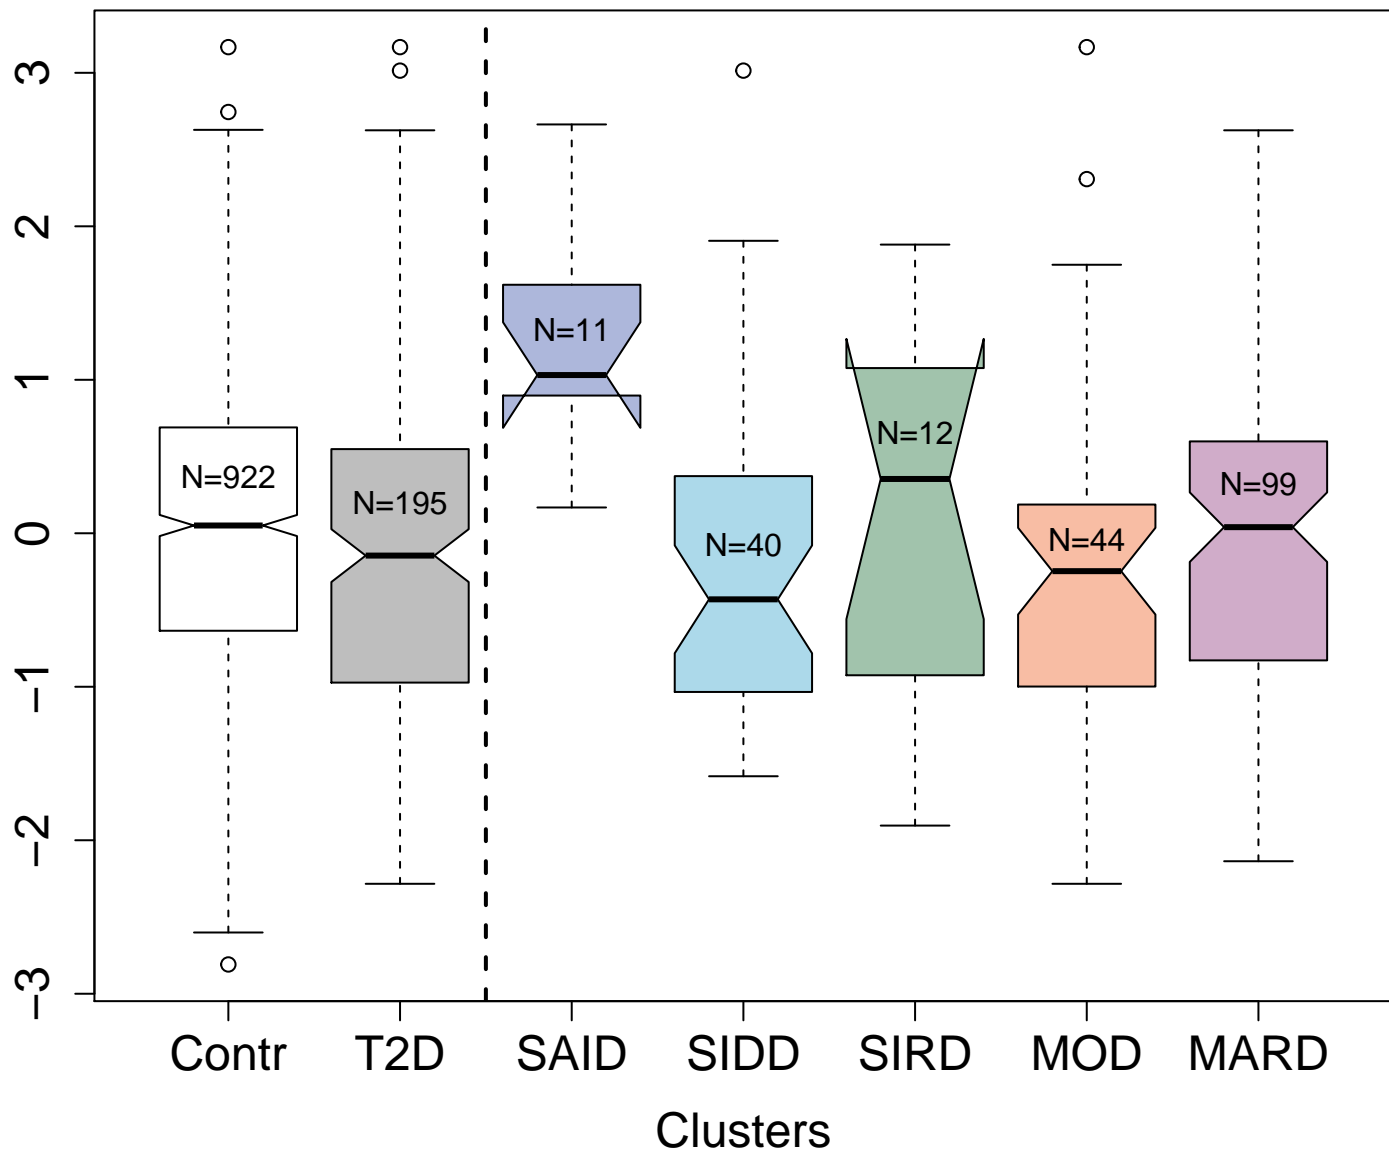

M48407 : dopamine 3-O-sulfate

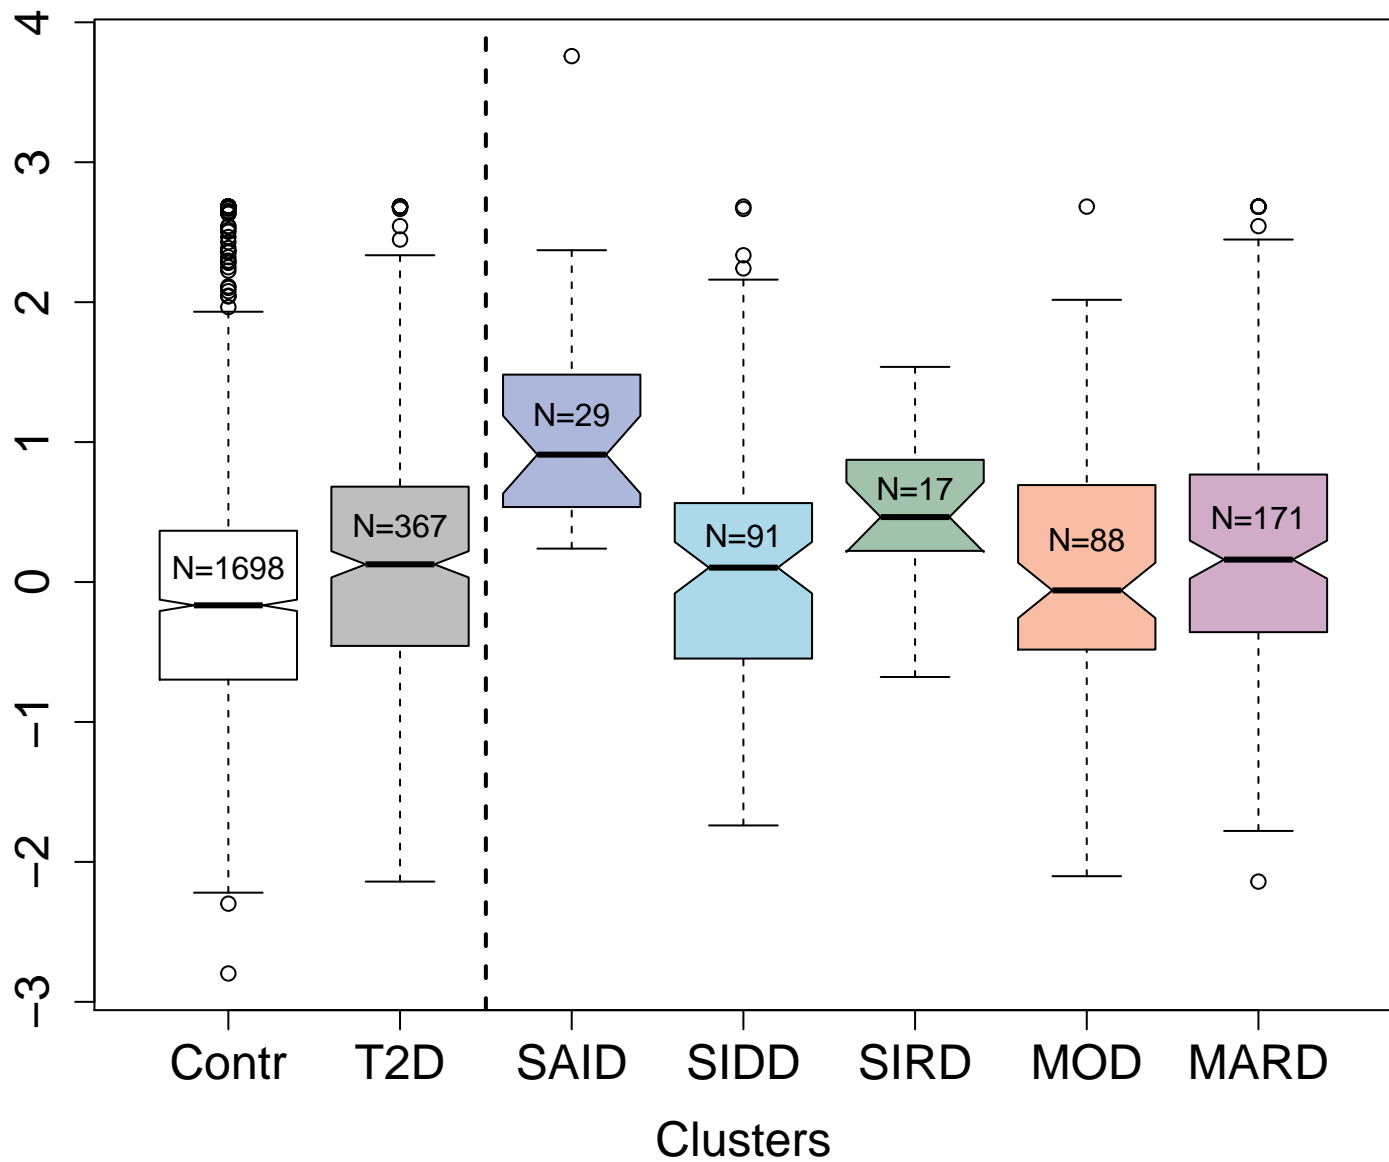

M61864 : dodecenedioate (C12:1-DC)\*

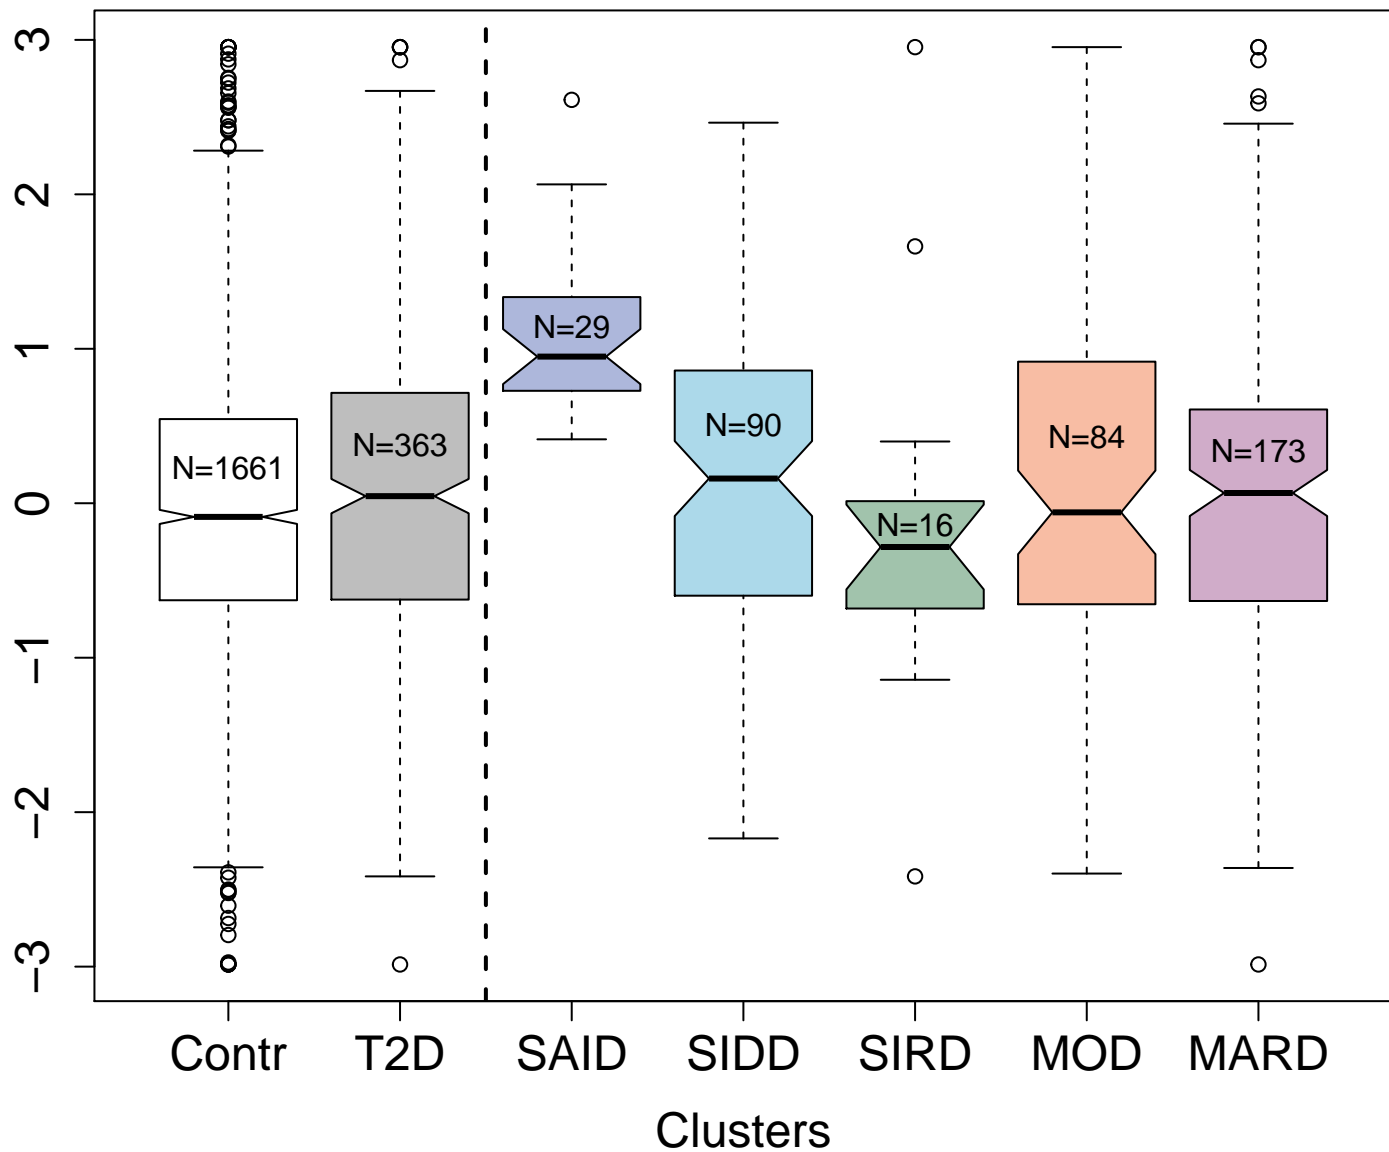

M54736 : phenylacetyl/methionine

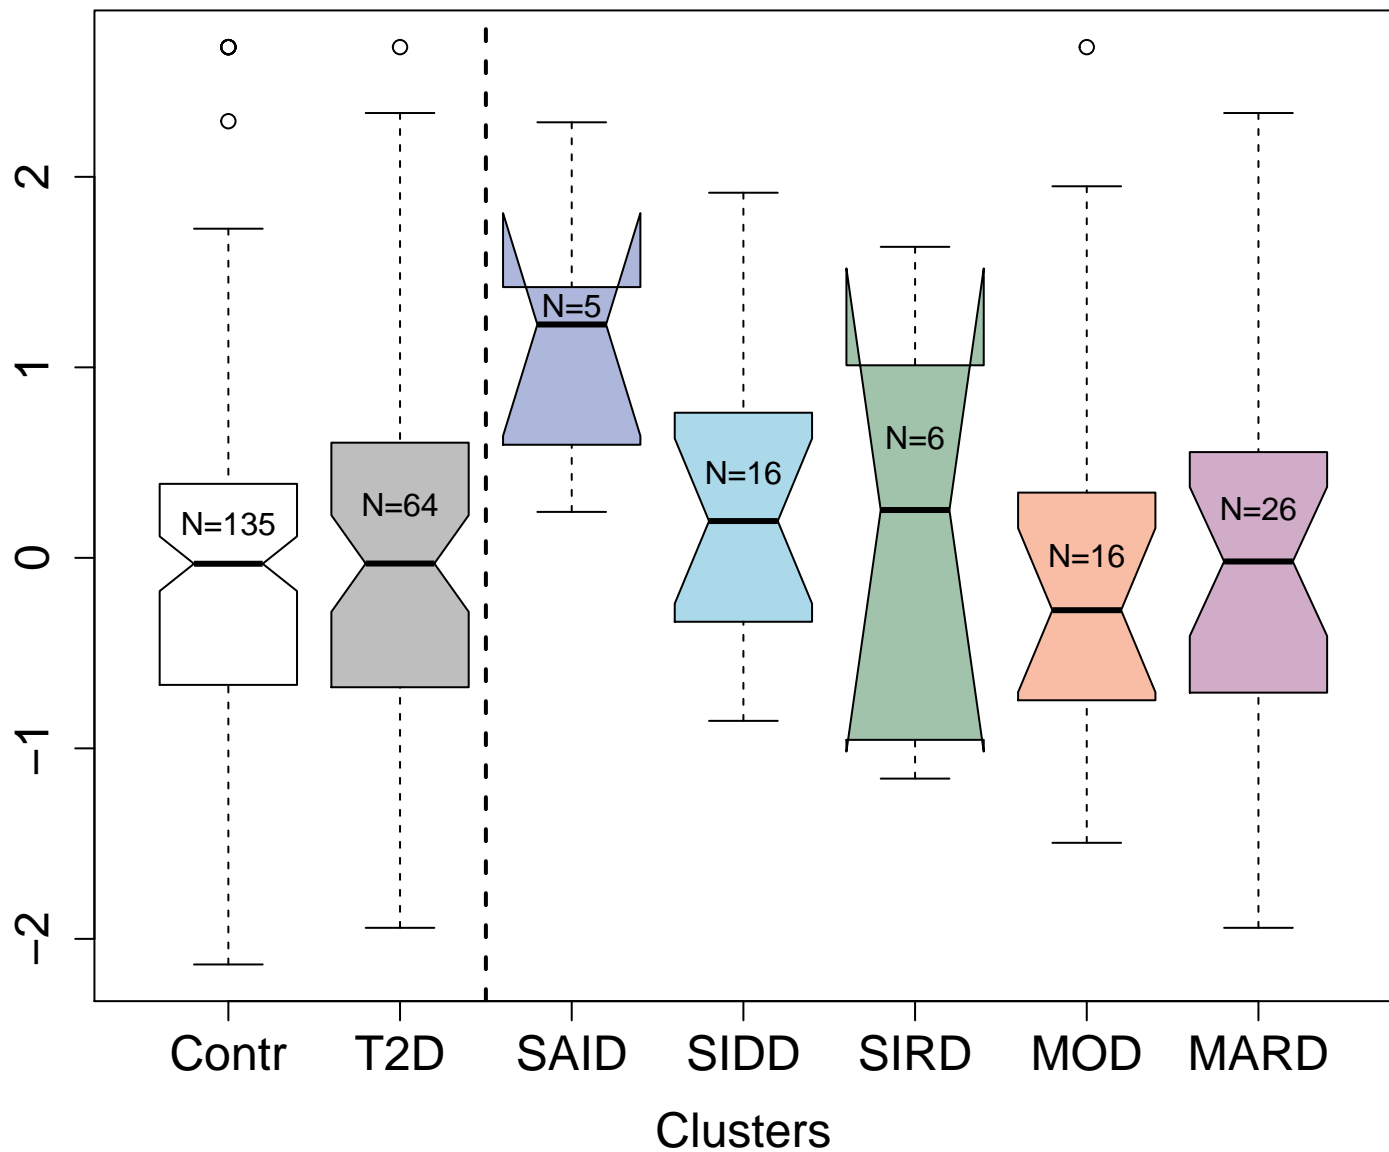

M46390 : X - 11308

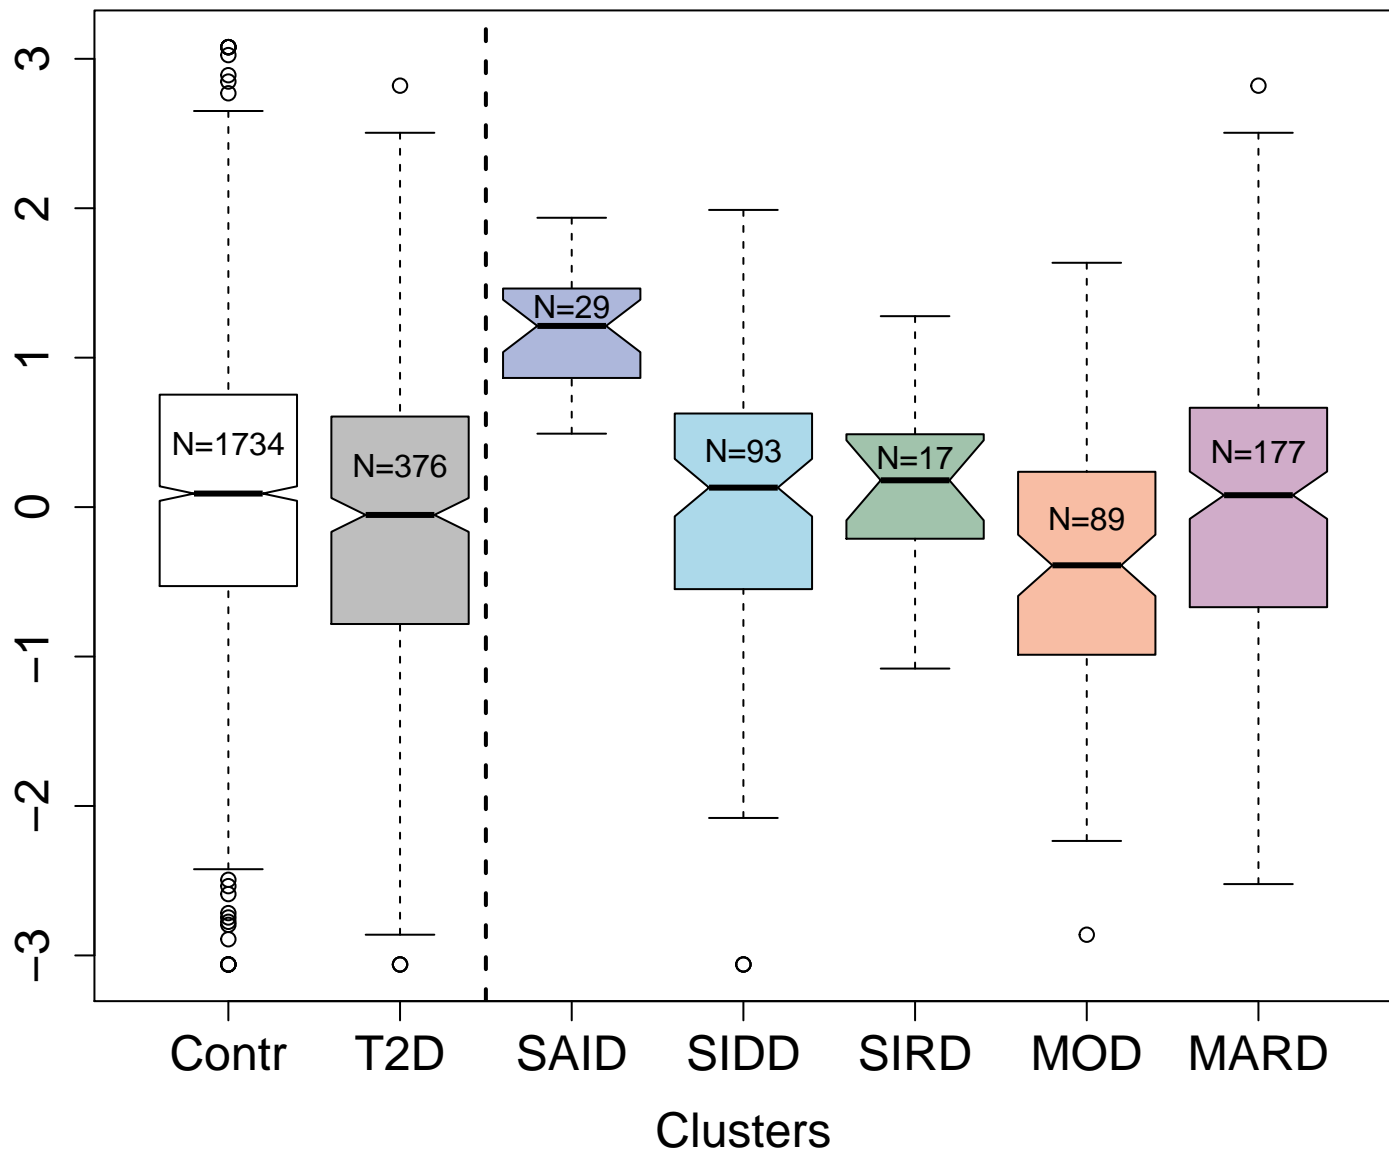



M48429 : methyl-4-hydroxybenzoate sulfate

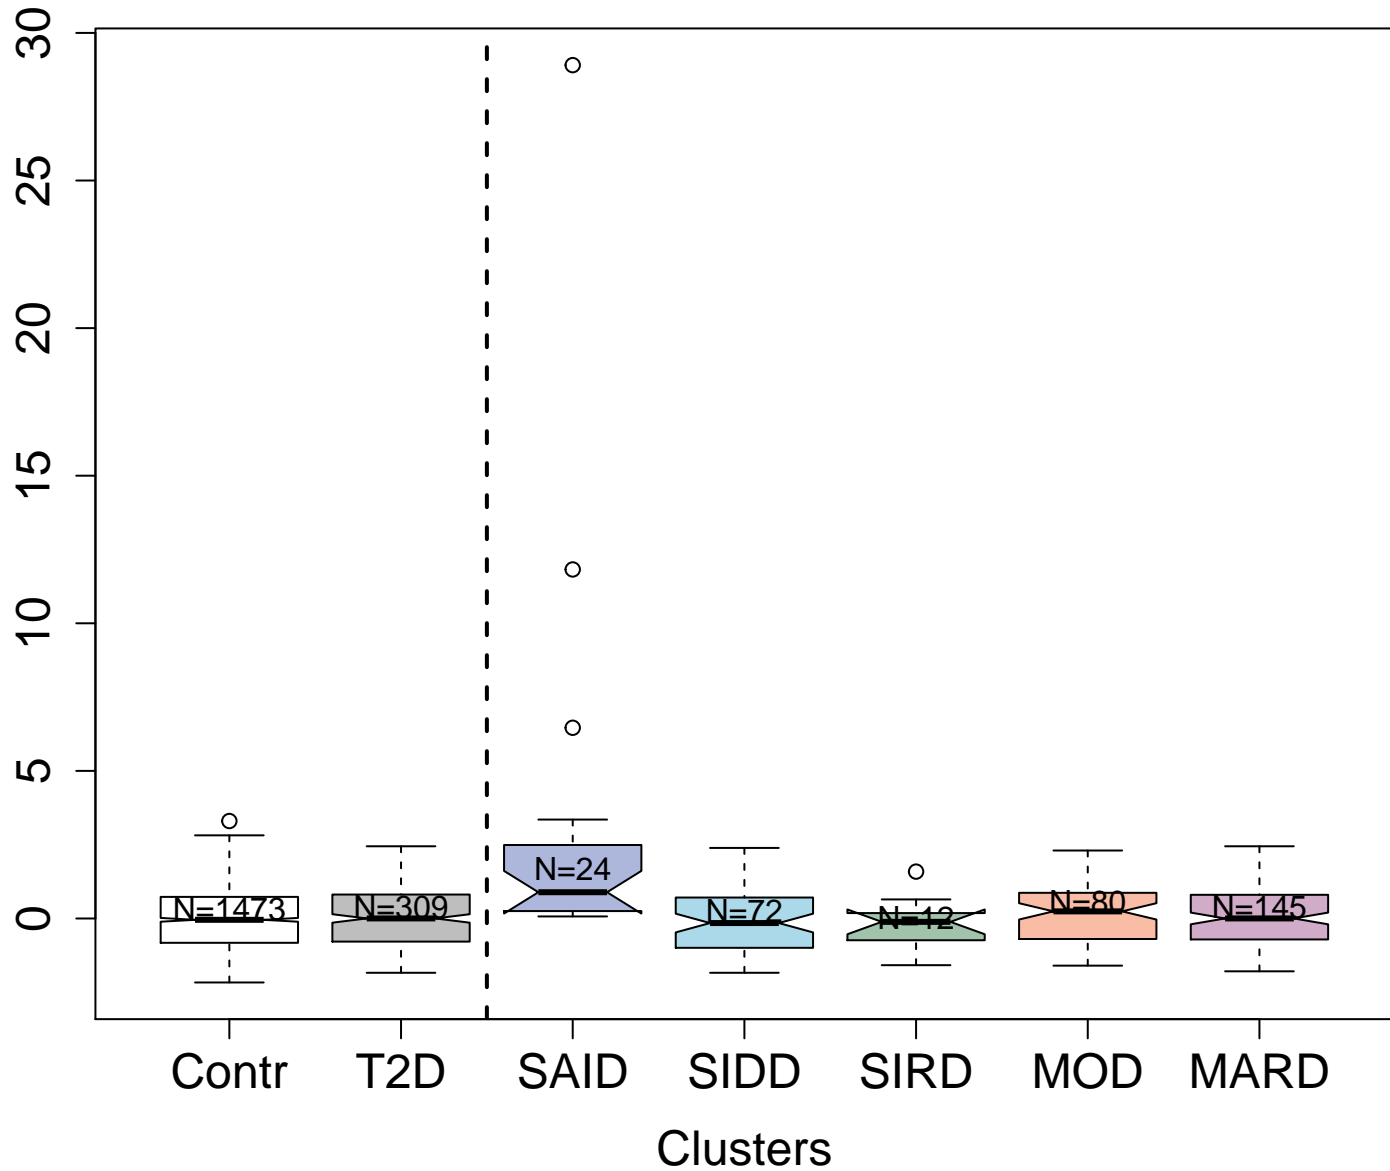

M46633 : X - 12844

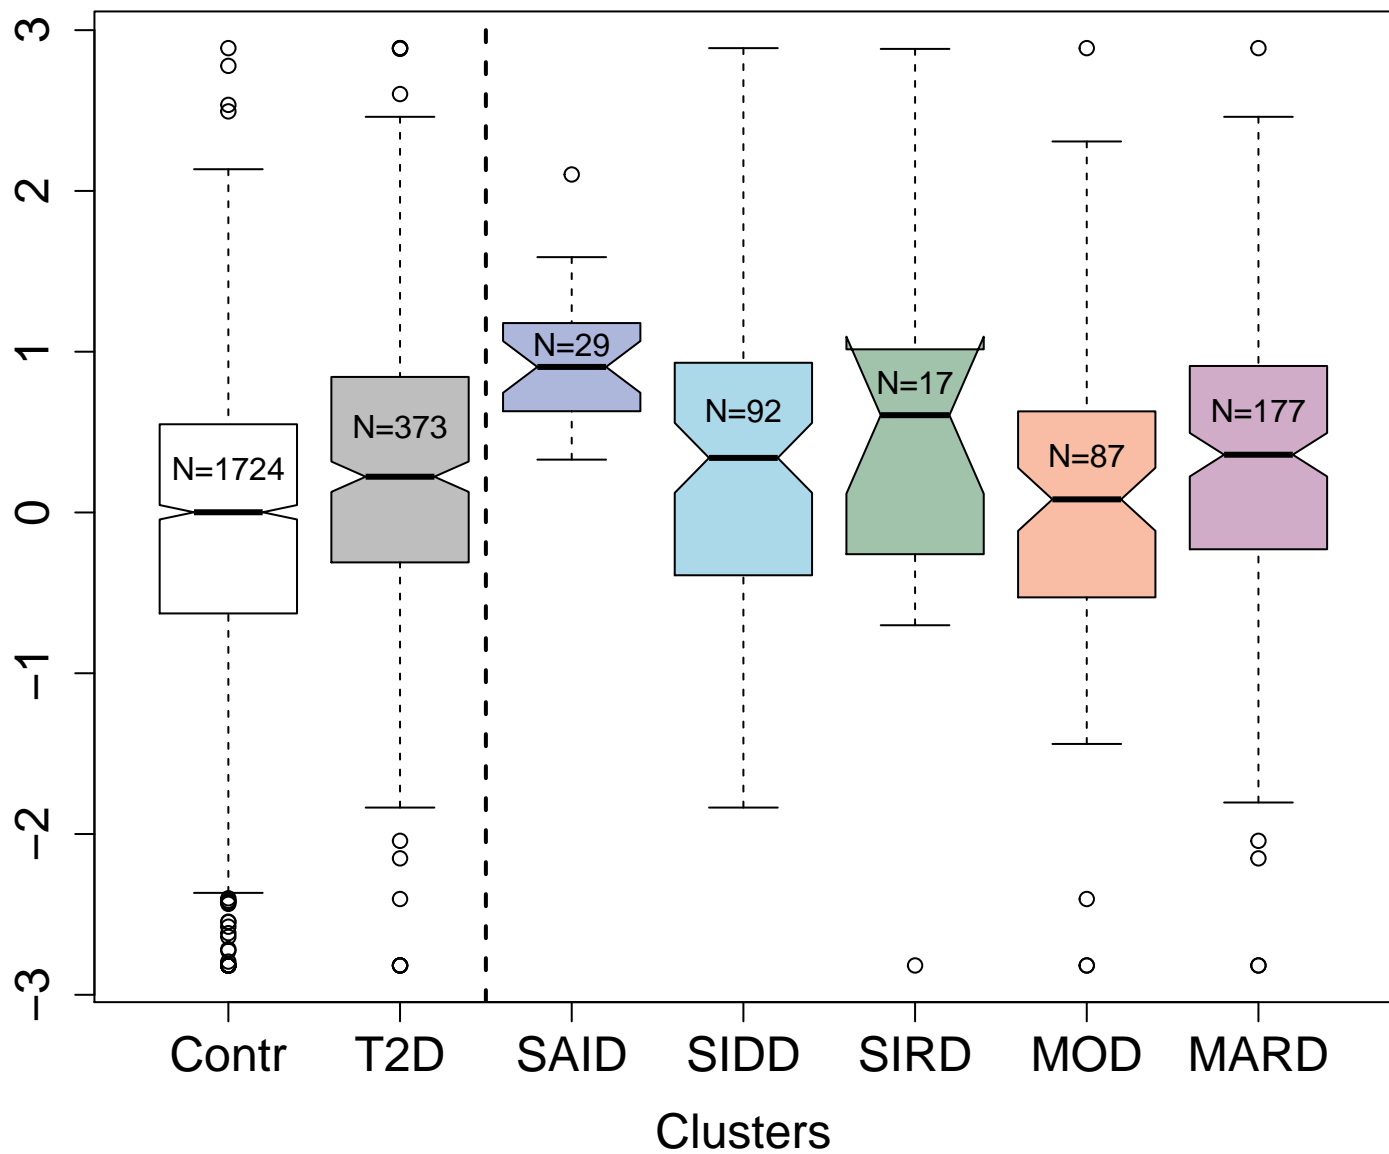

M19503 : stearoyl sphingomyelin (d18:1/18:0)

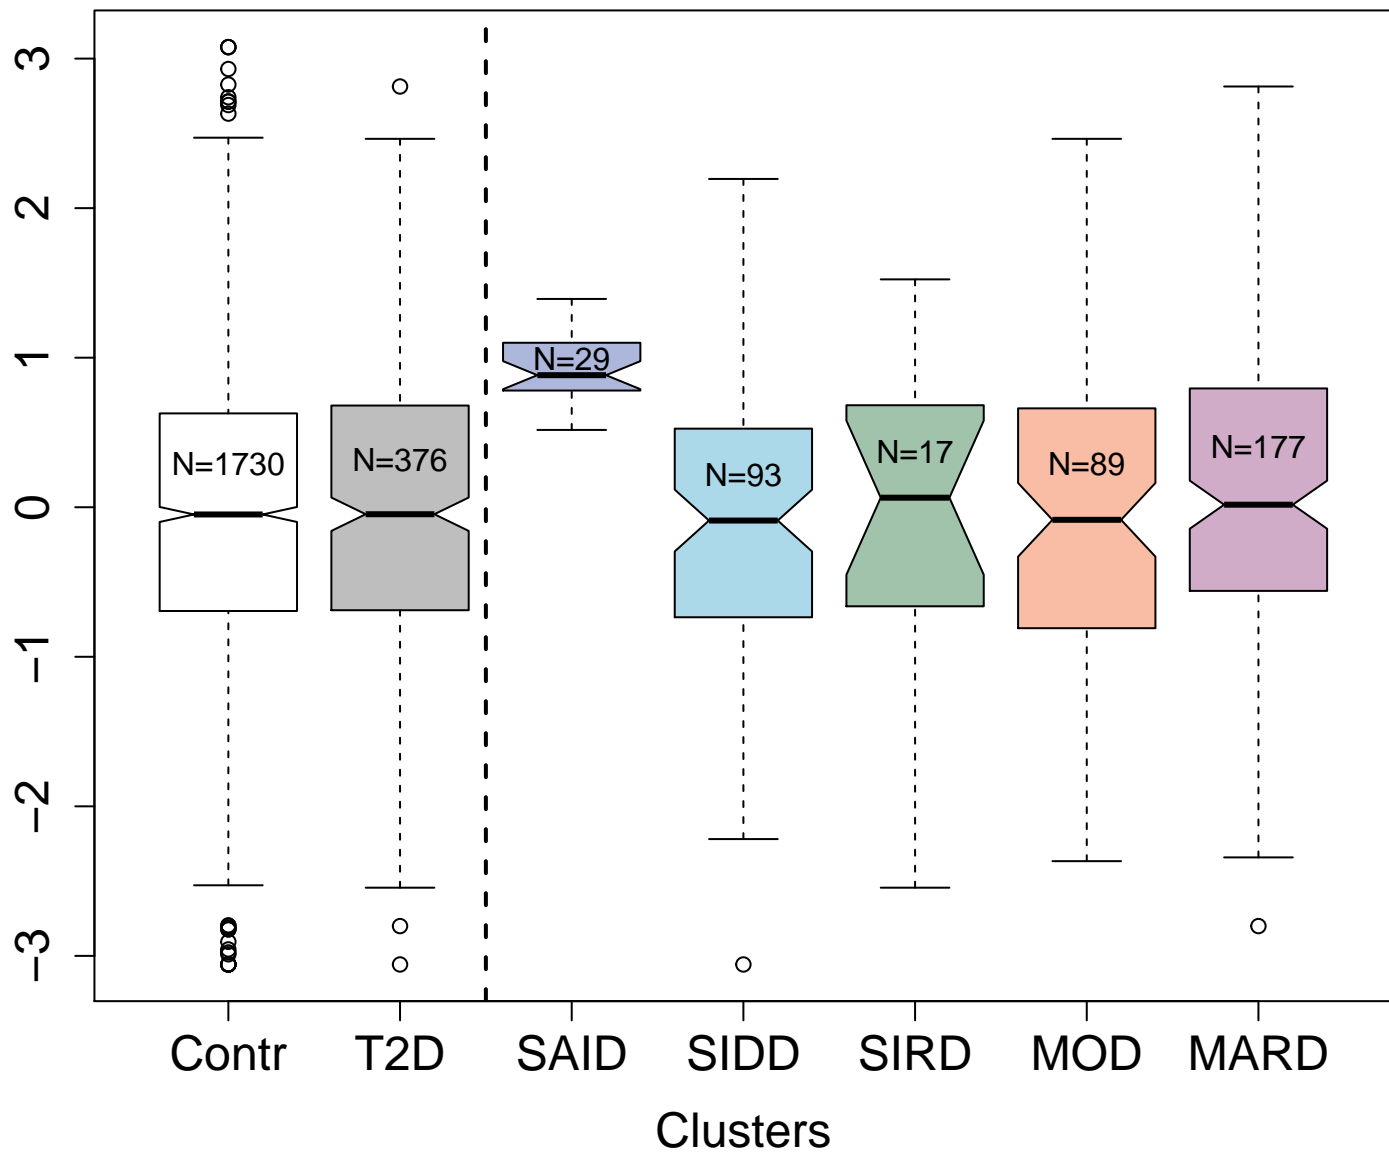

M40469 : N1-Methyl-2-pyridone-5-carboxamide

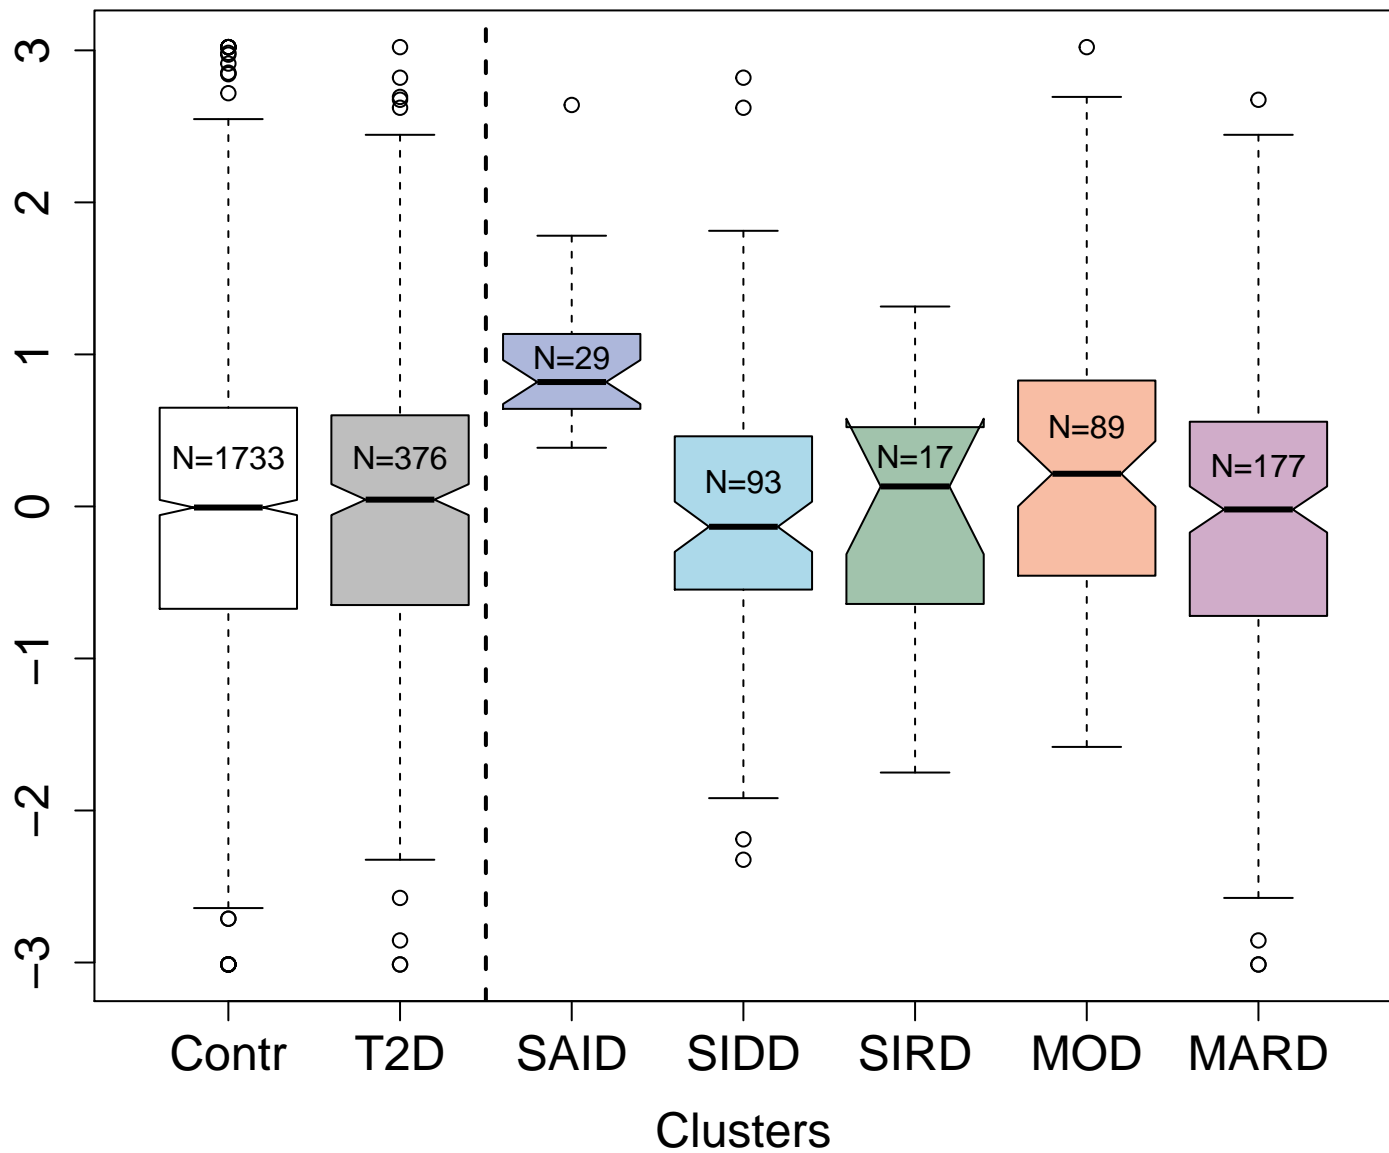

M63592 : X - 25810

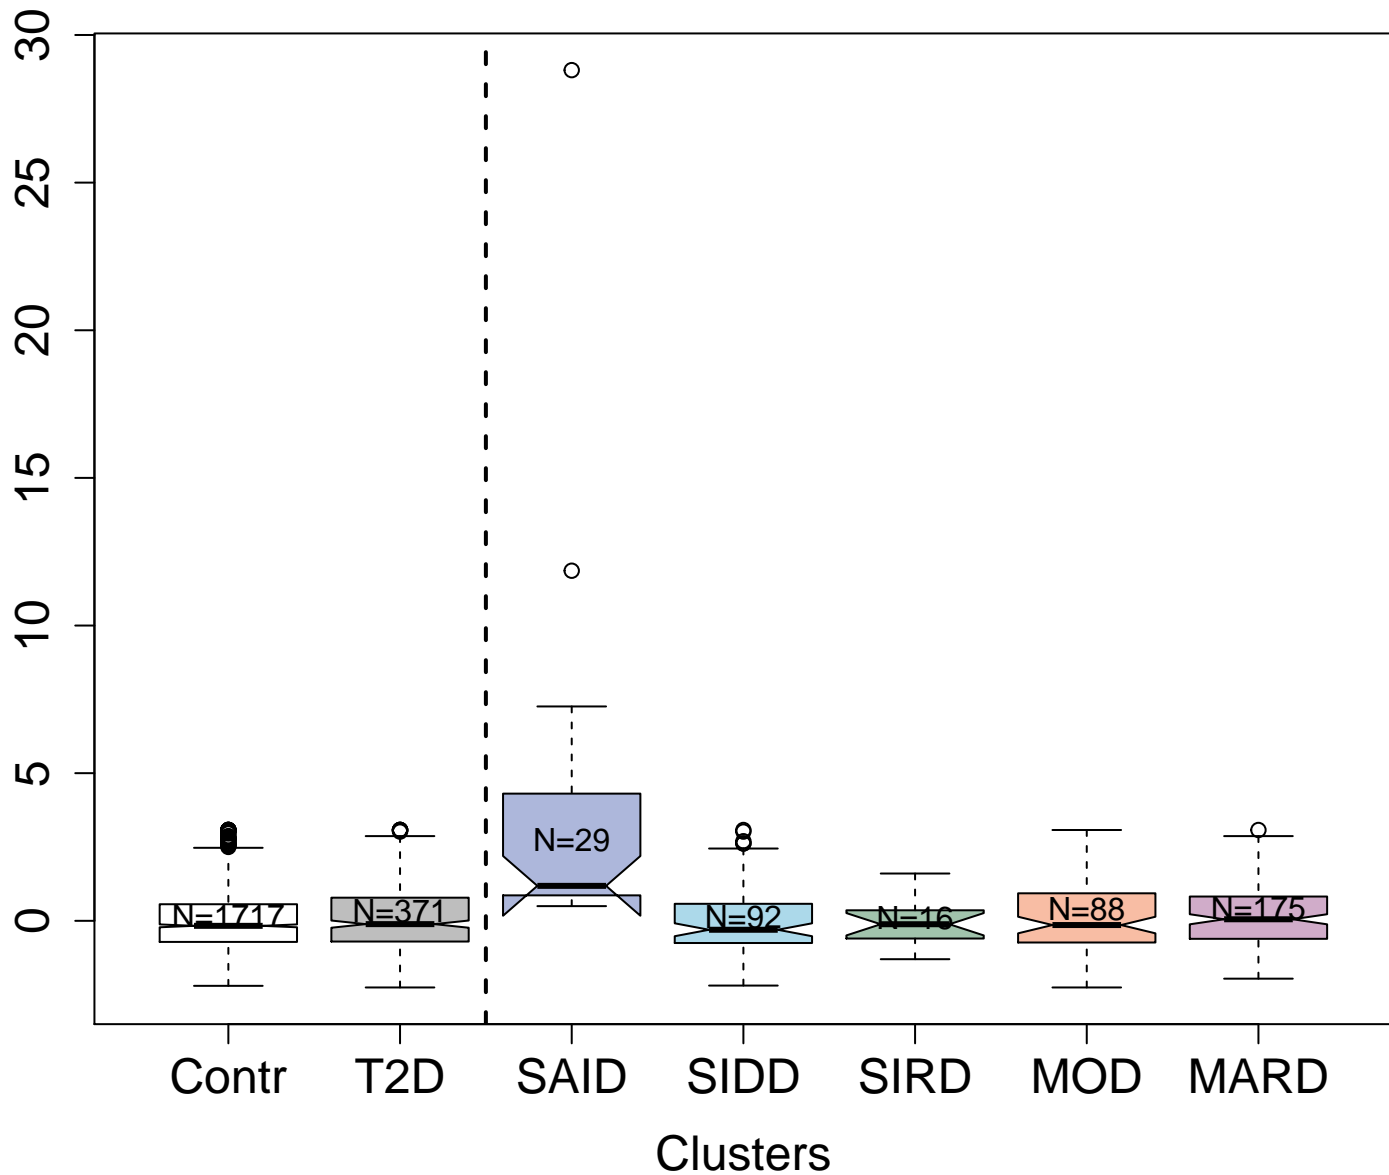

M62296 : sulfate of piperine metabolite C<sup>16</sup>H<sup>19</sup>NO<sub>3</sub> (3)\*

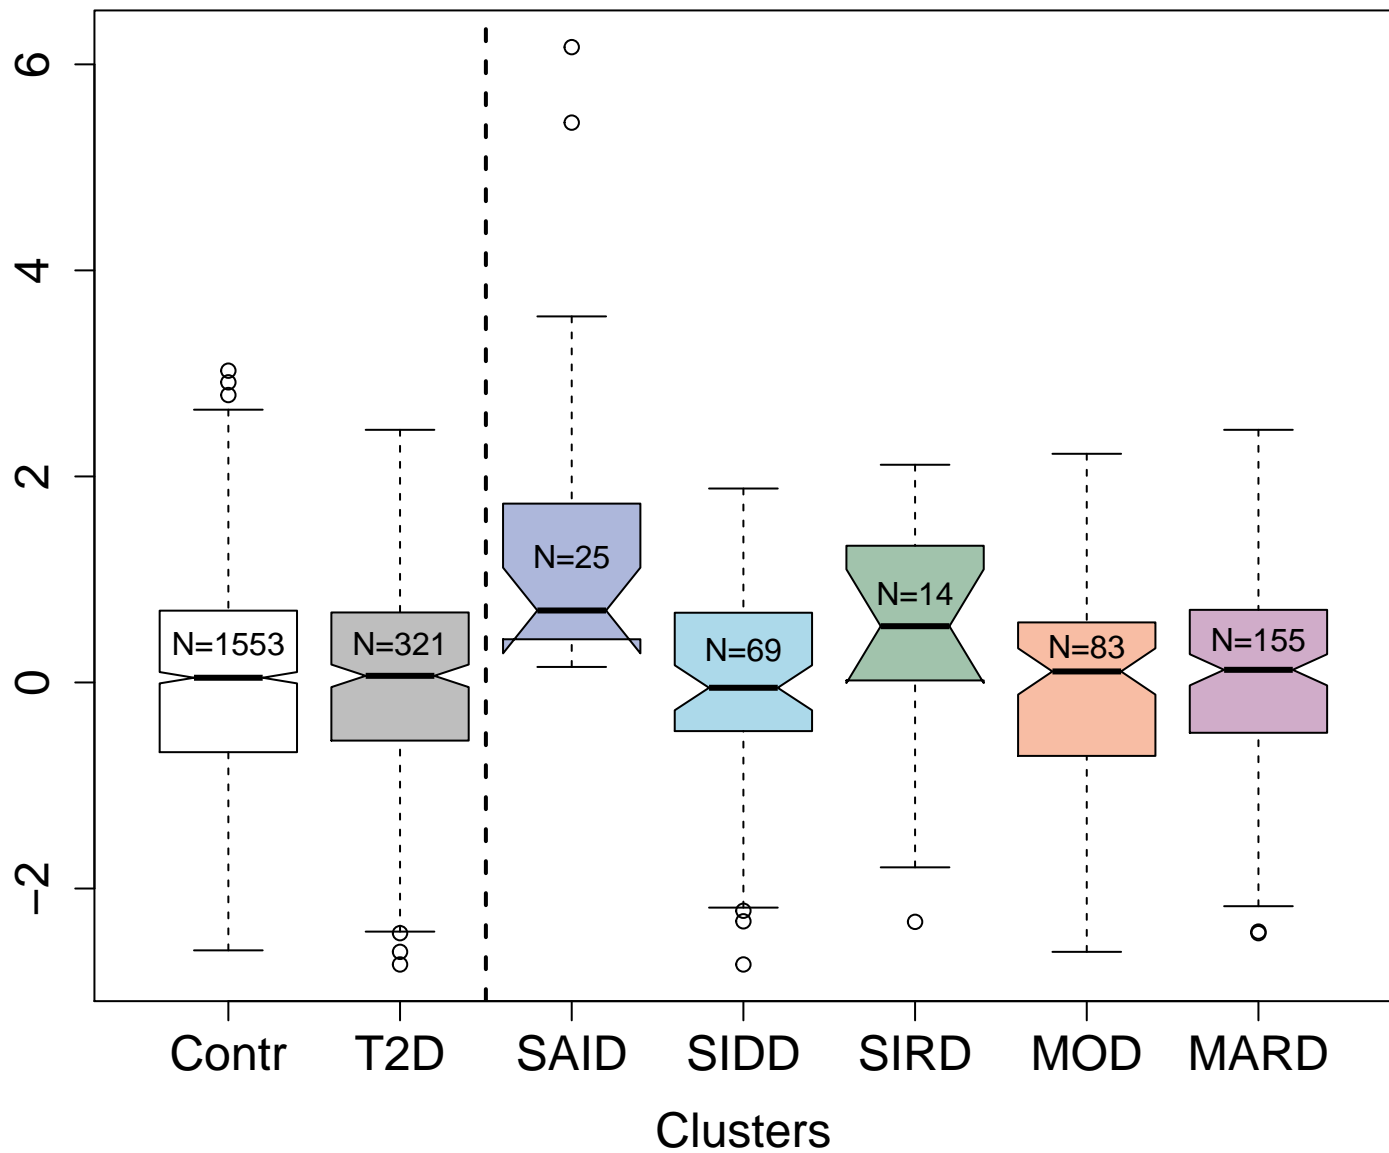

M48460 : propyl 4-hydroxybenzoate sulfate

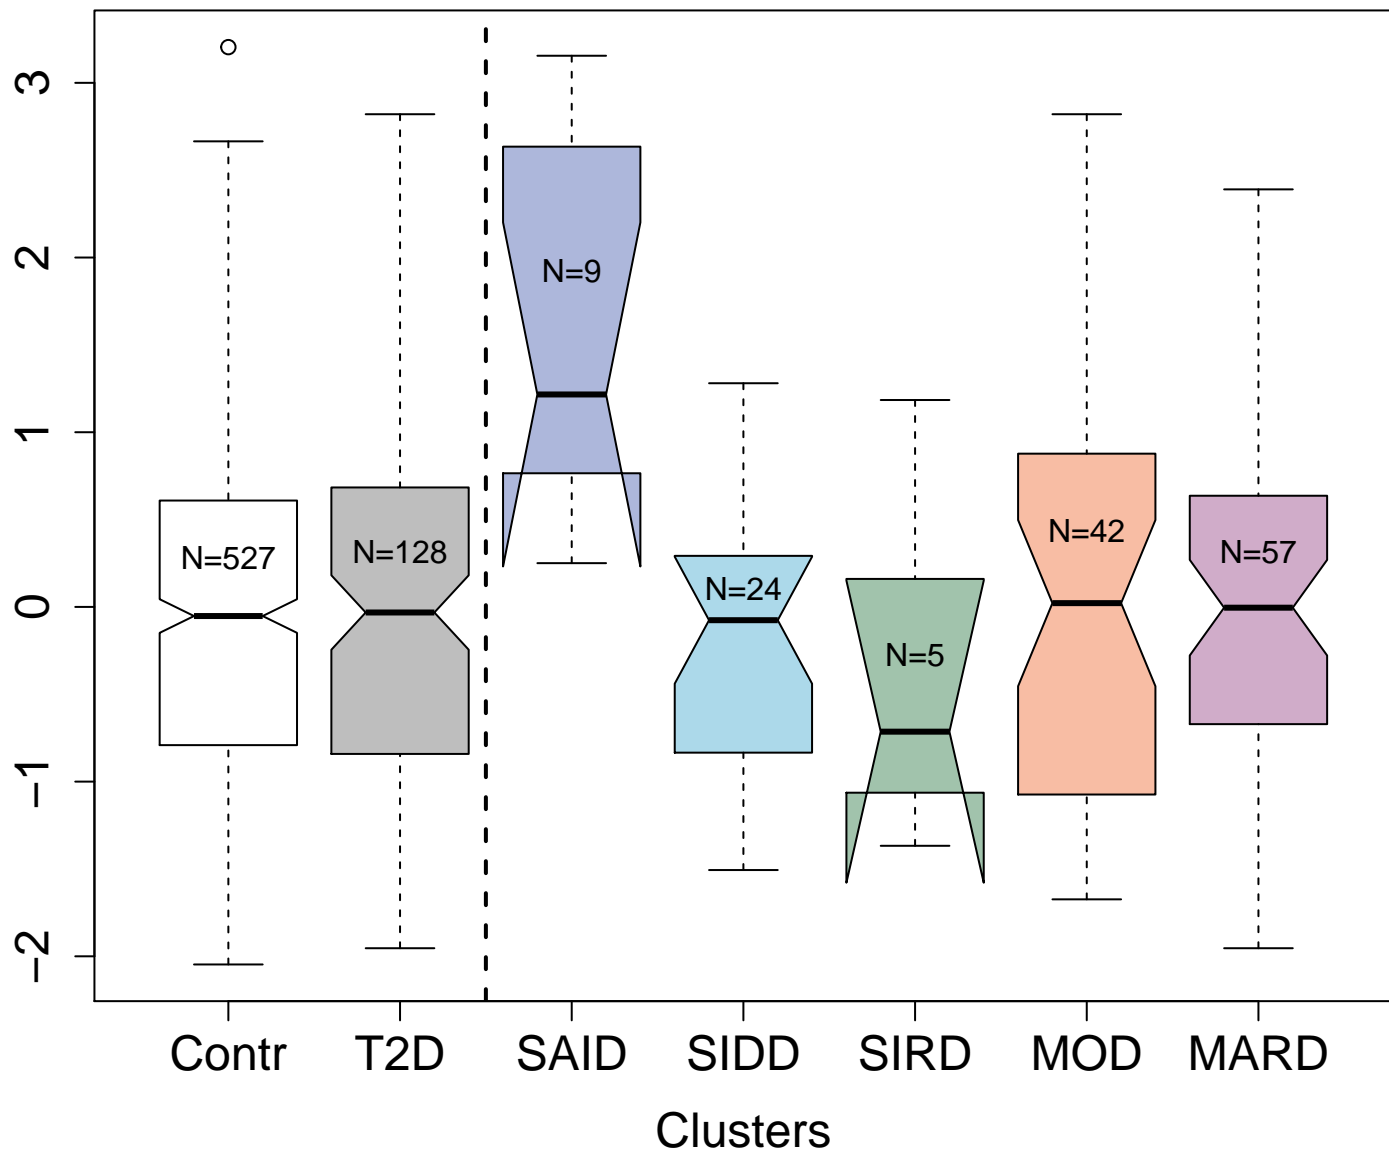

M52925 : phenylacetylglutamate

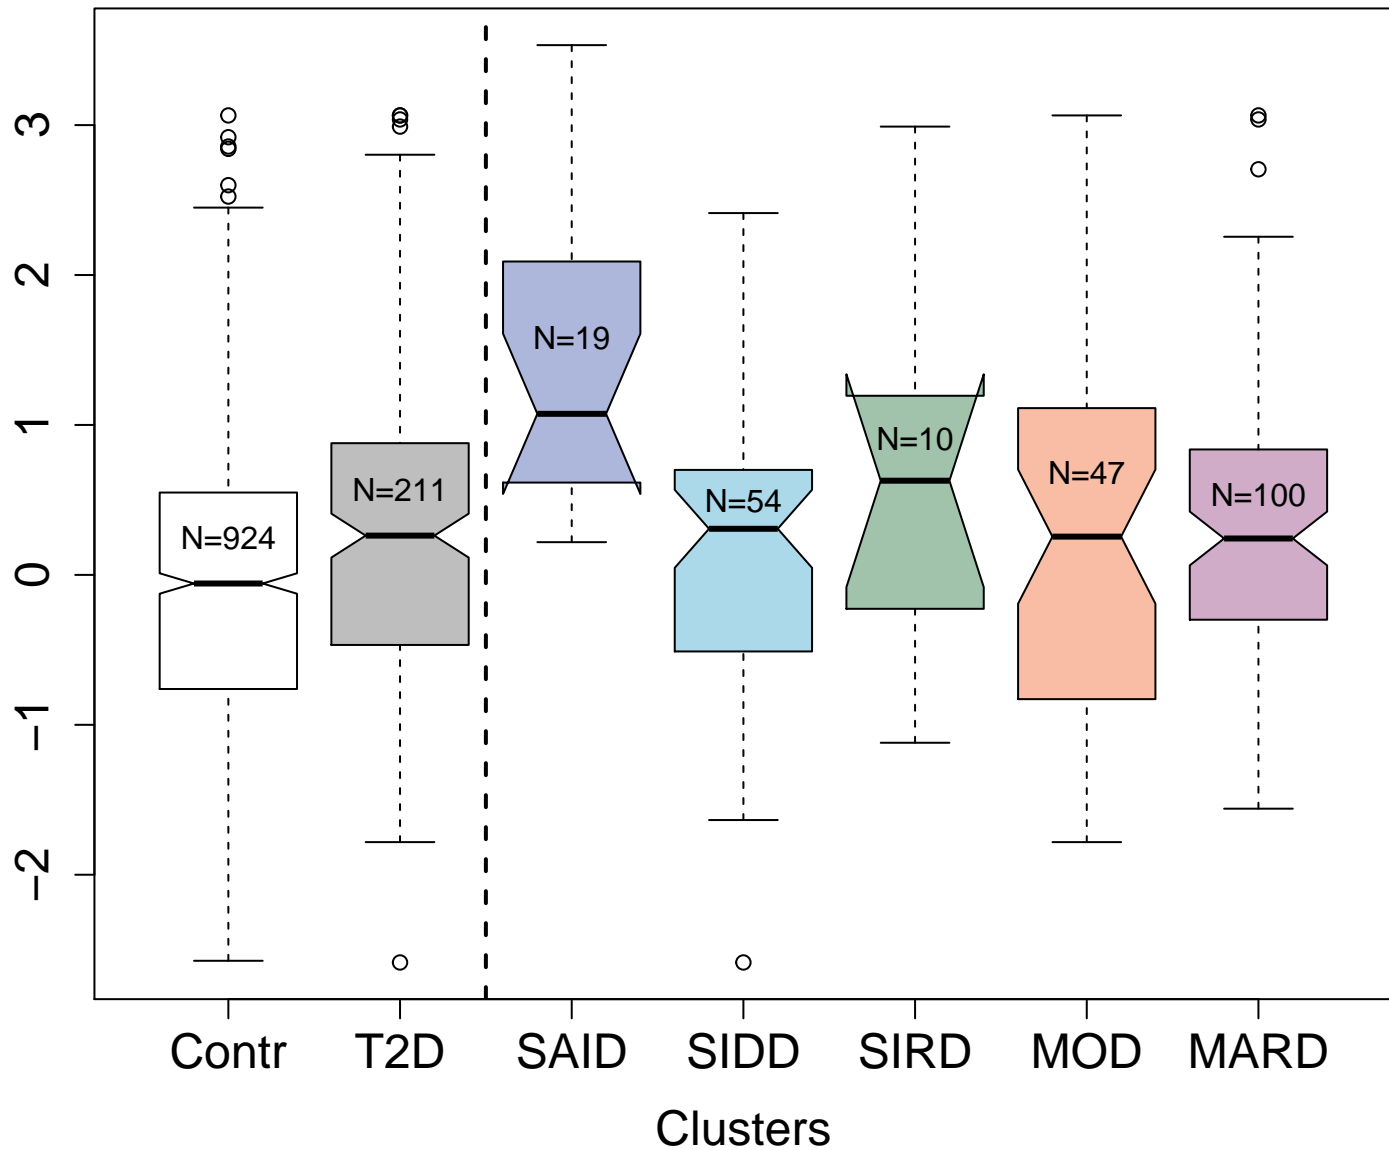



M63739 : 2-hydroxy-4-(methylthio)butanoic acid

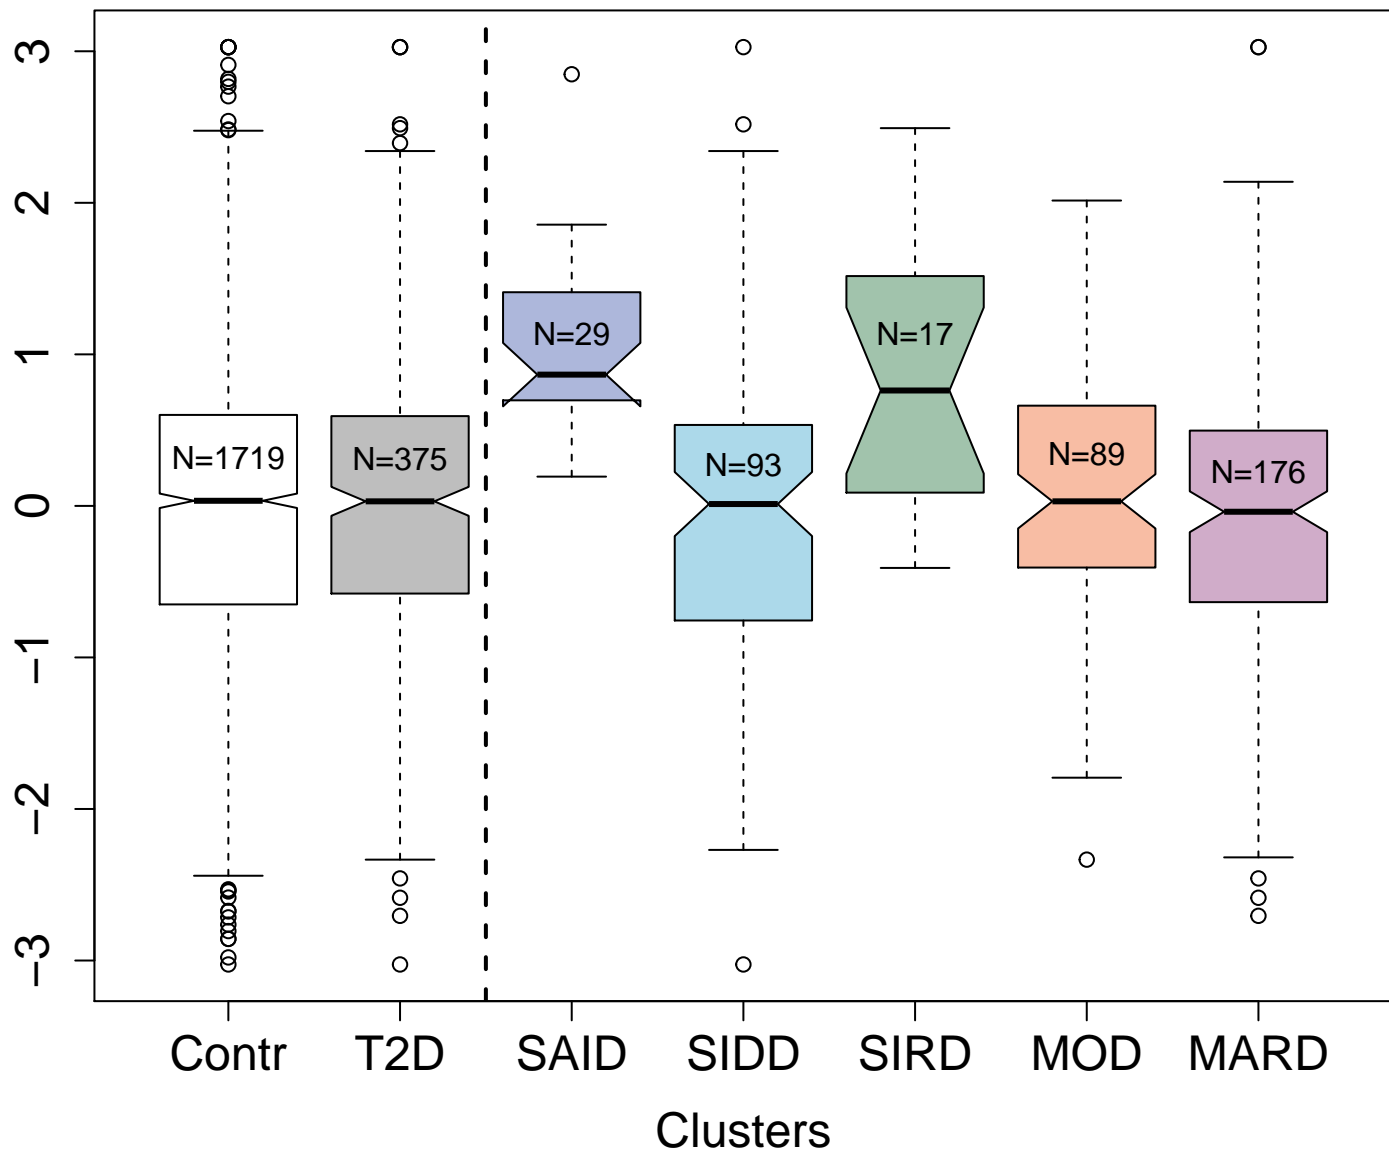

M46998 : X - 21821

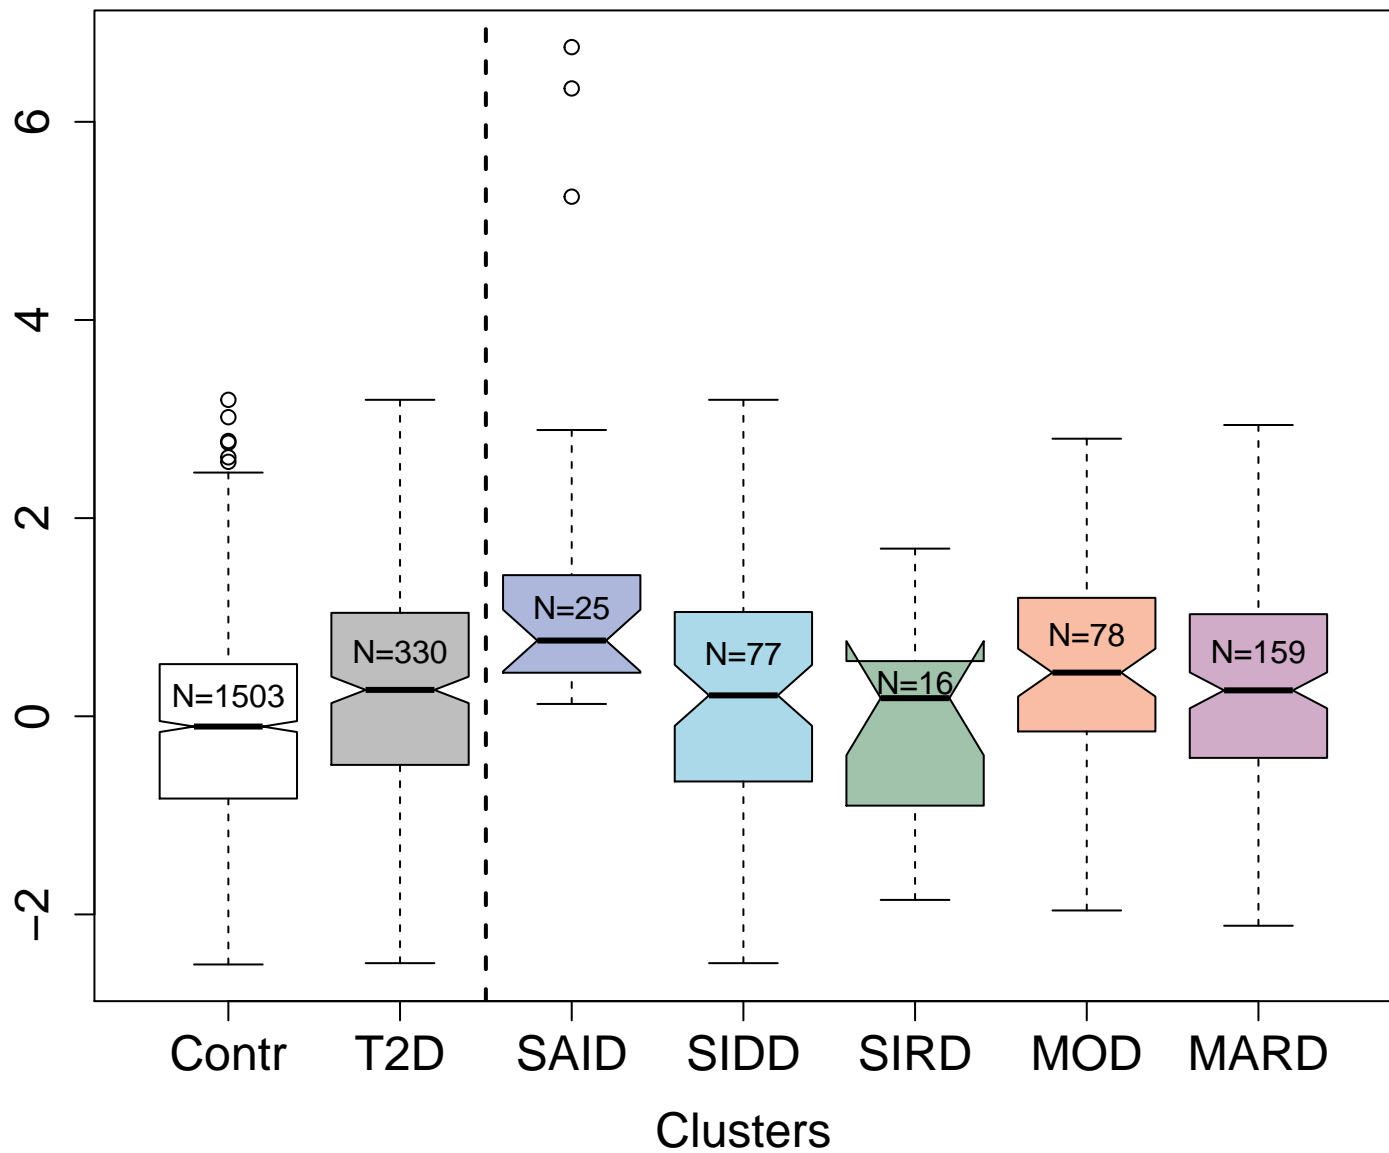

M46986 : X - 12812

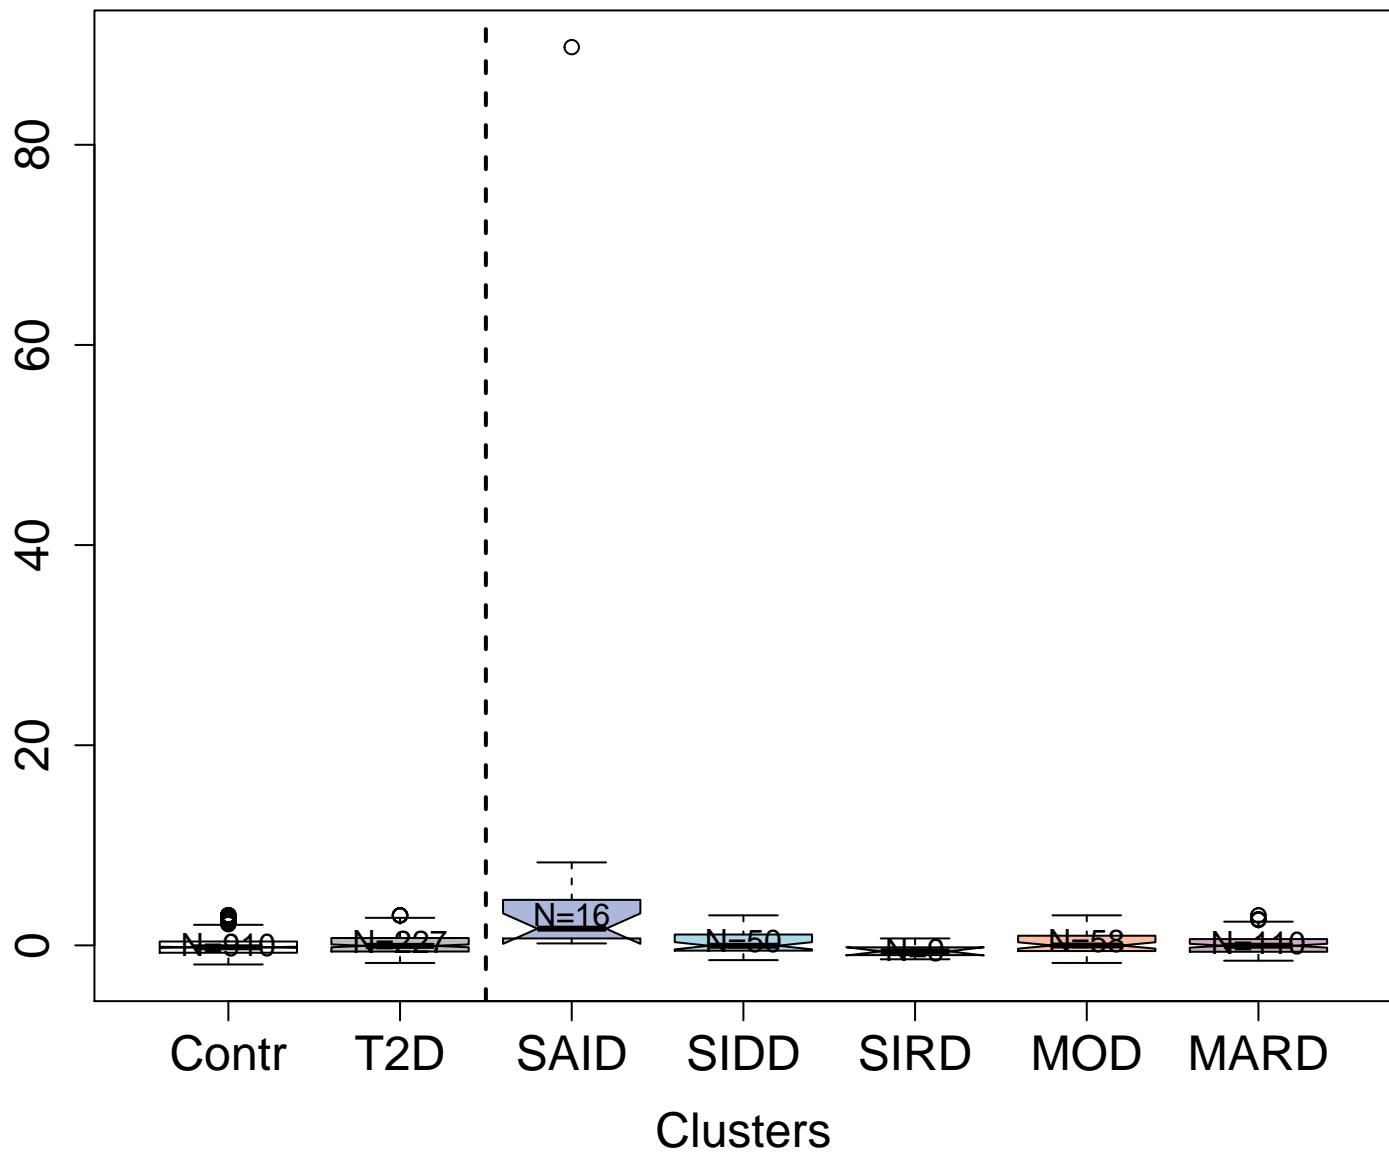

M42395 : undecanedioate (C11-DC)

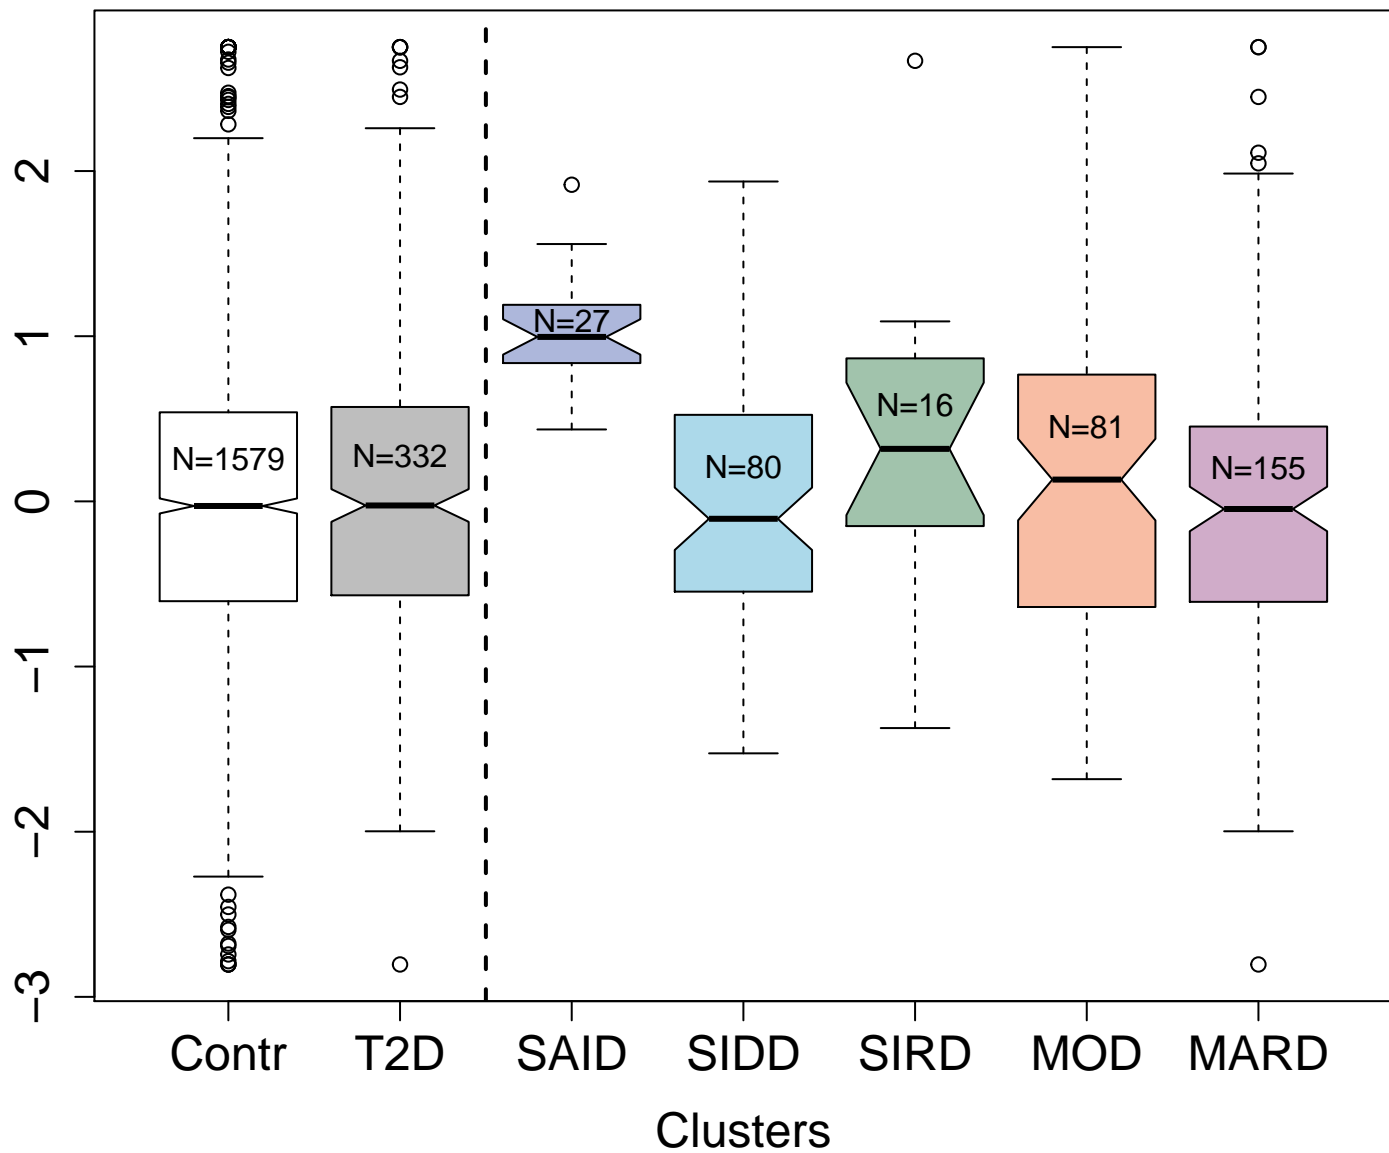

M27513 : indoleacetate

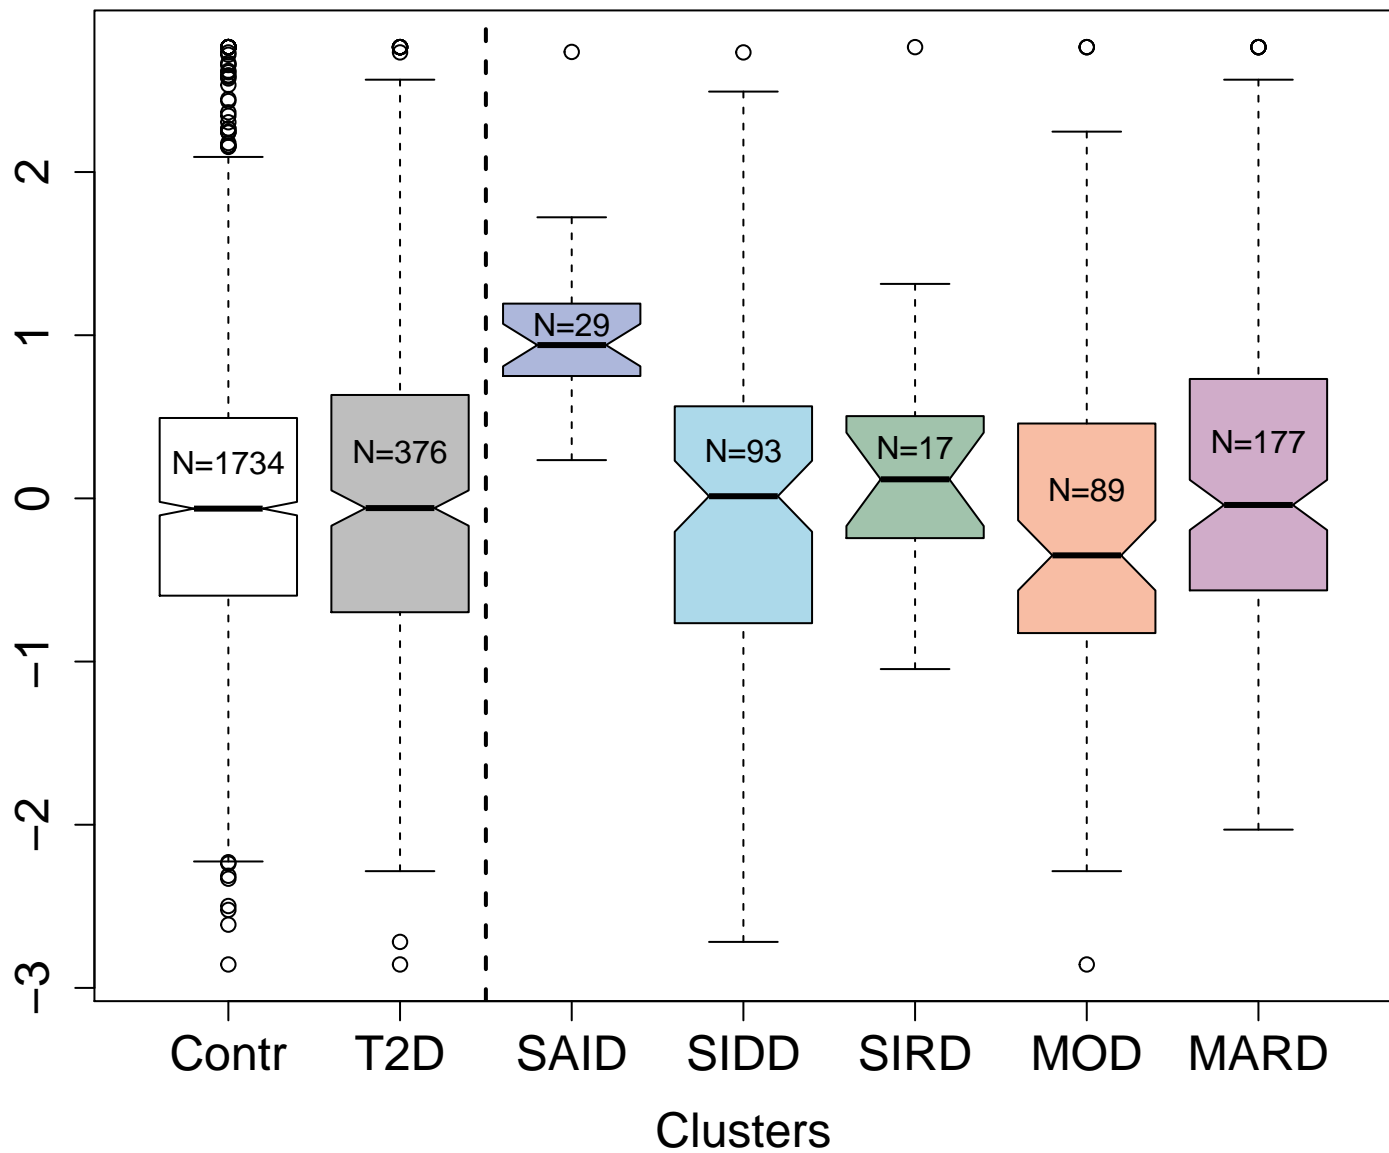

M36103 : p-cresol sulfate

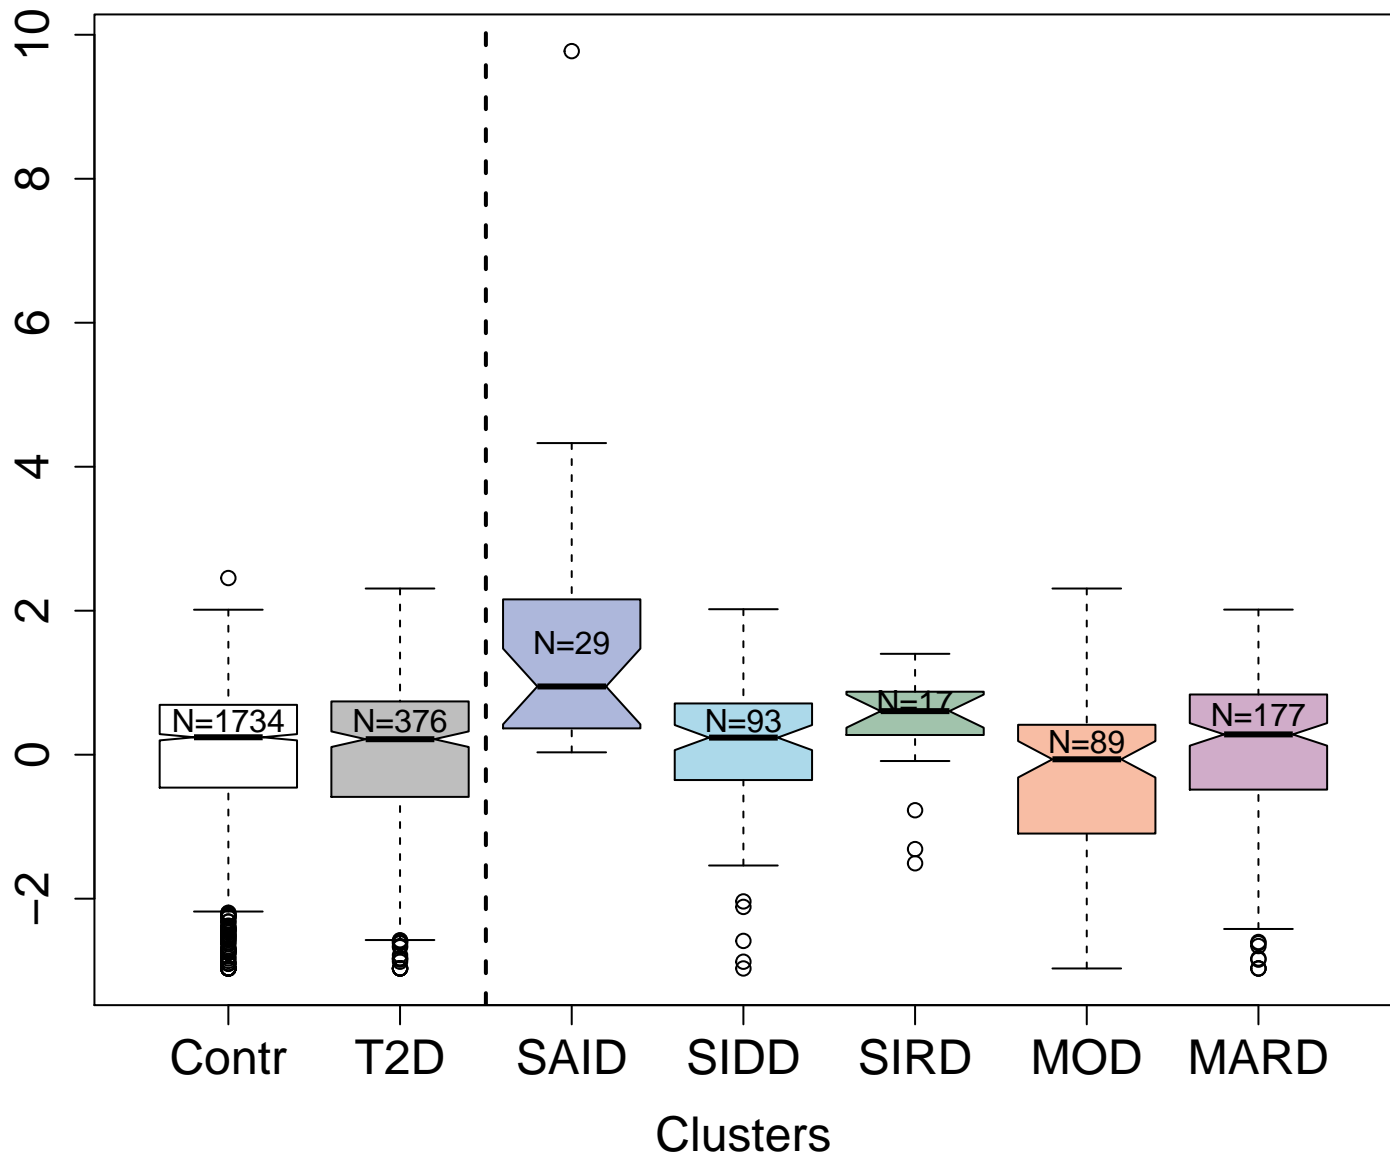

M46521: X - 11852

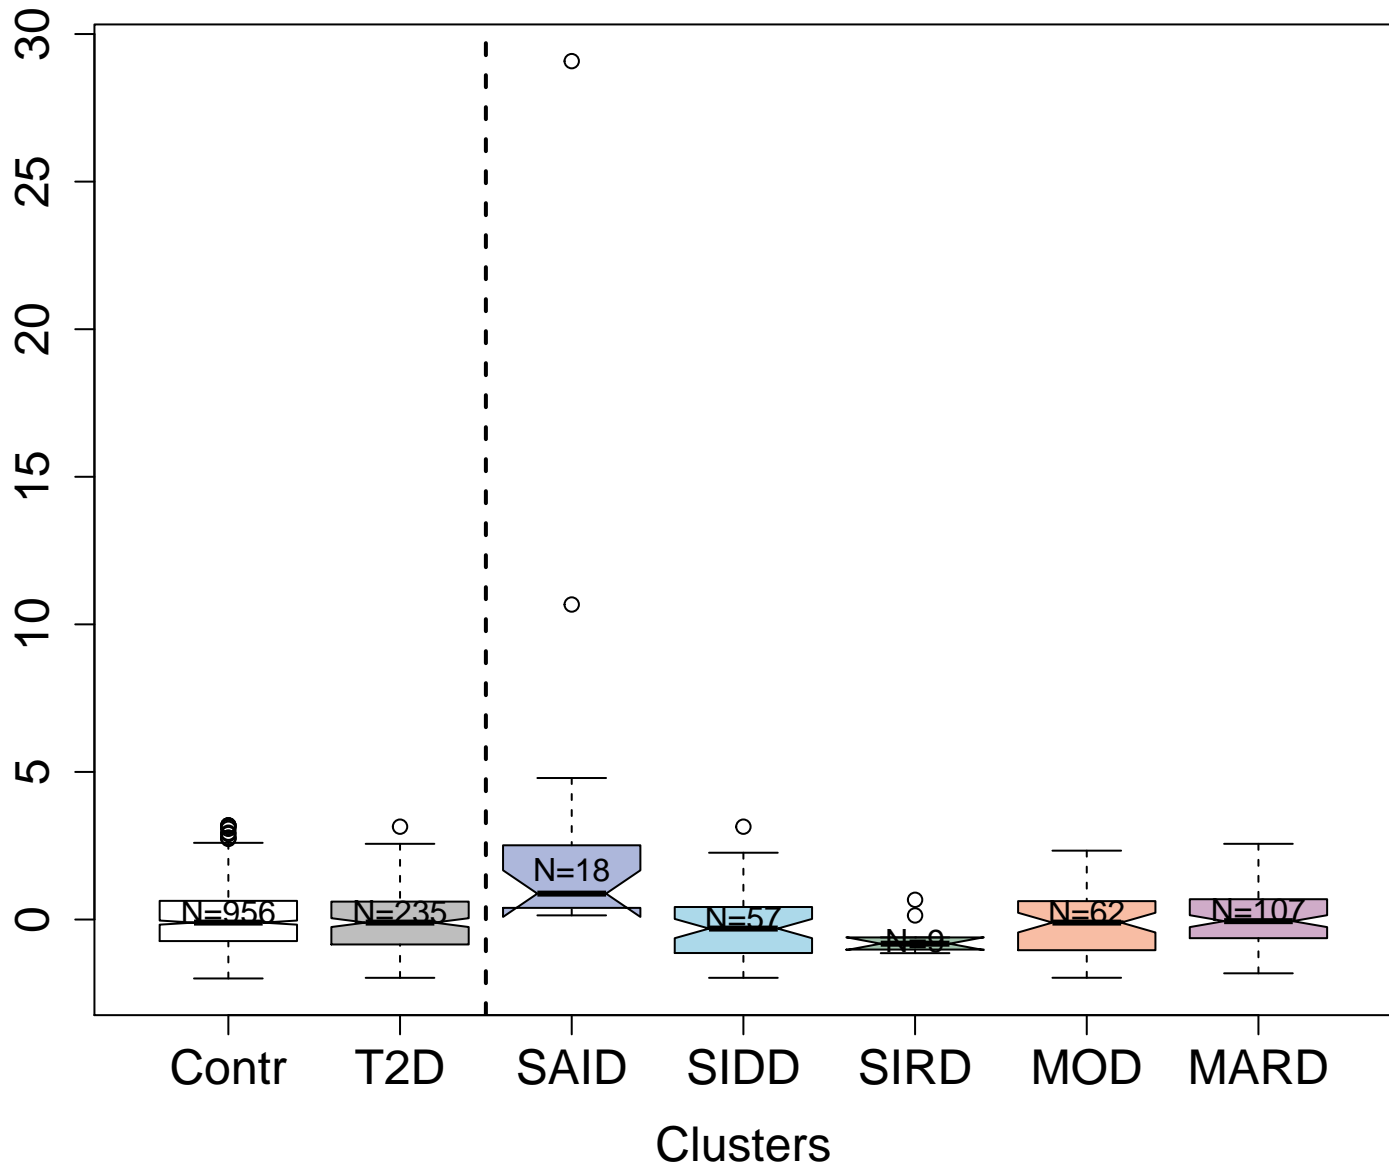

M1508 : pantothenate

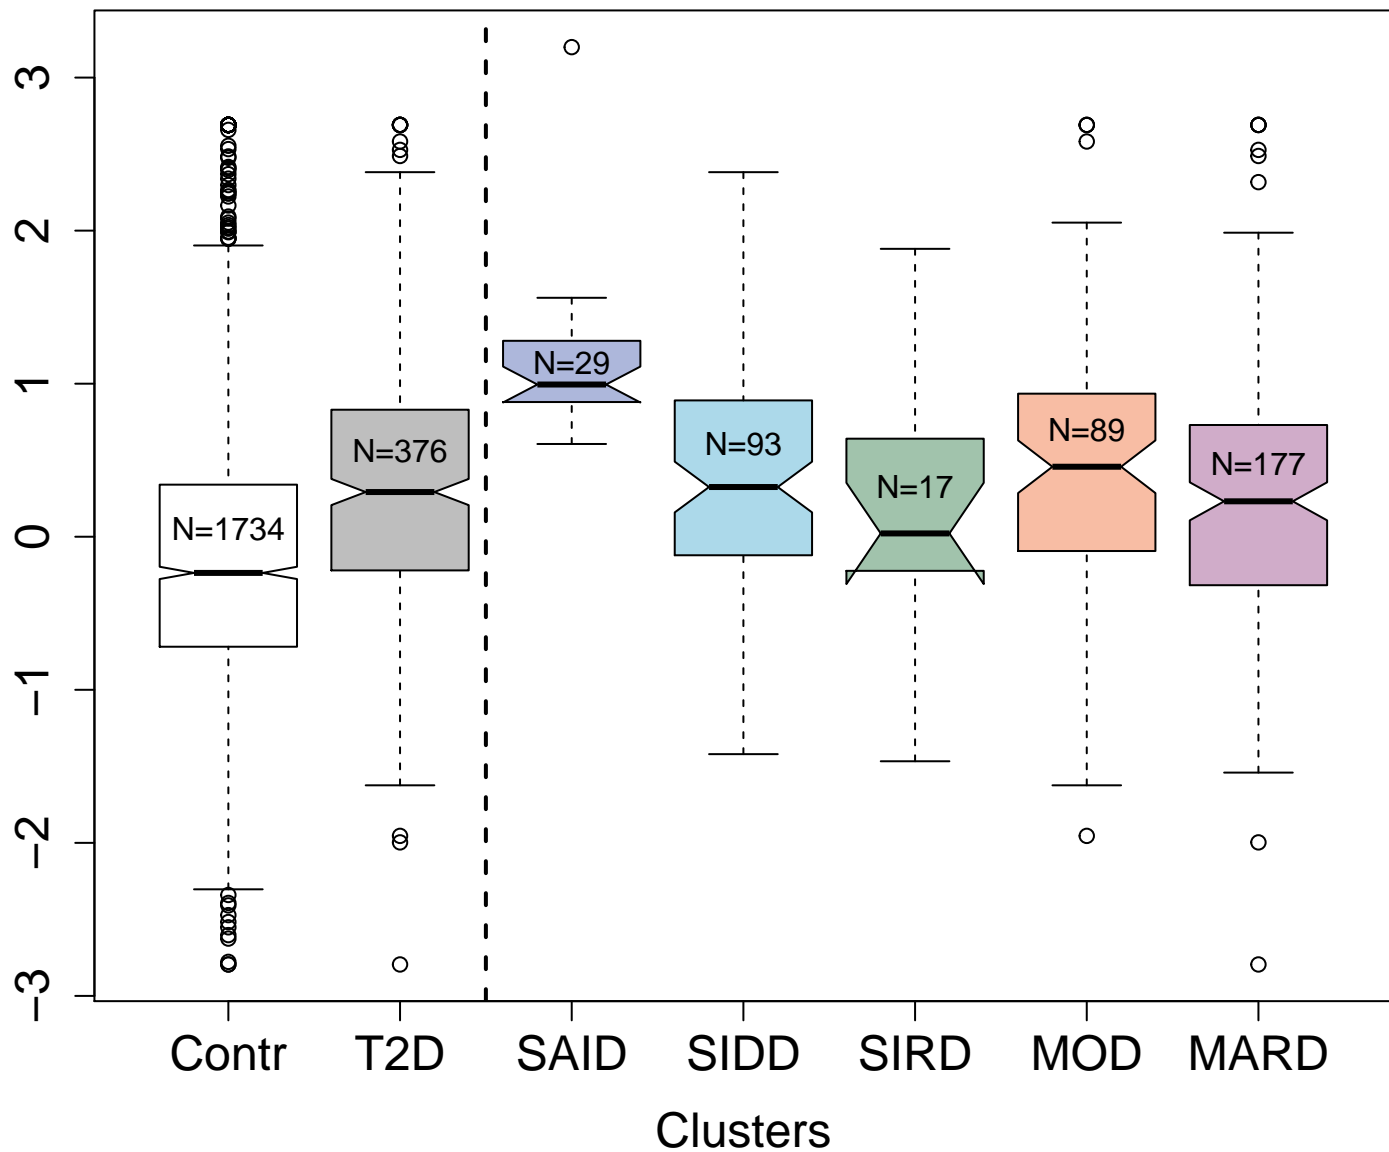



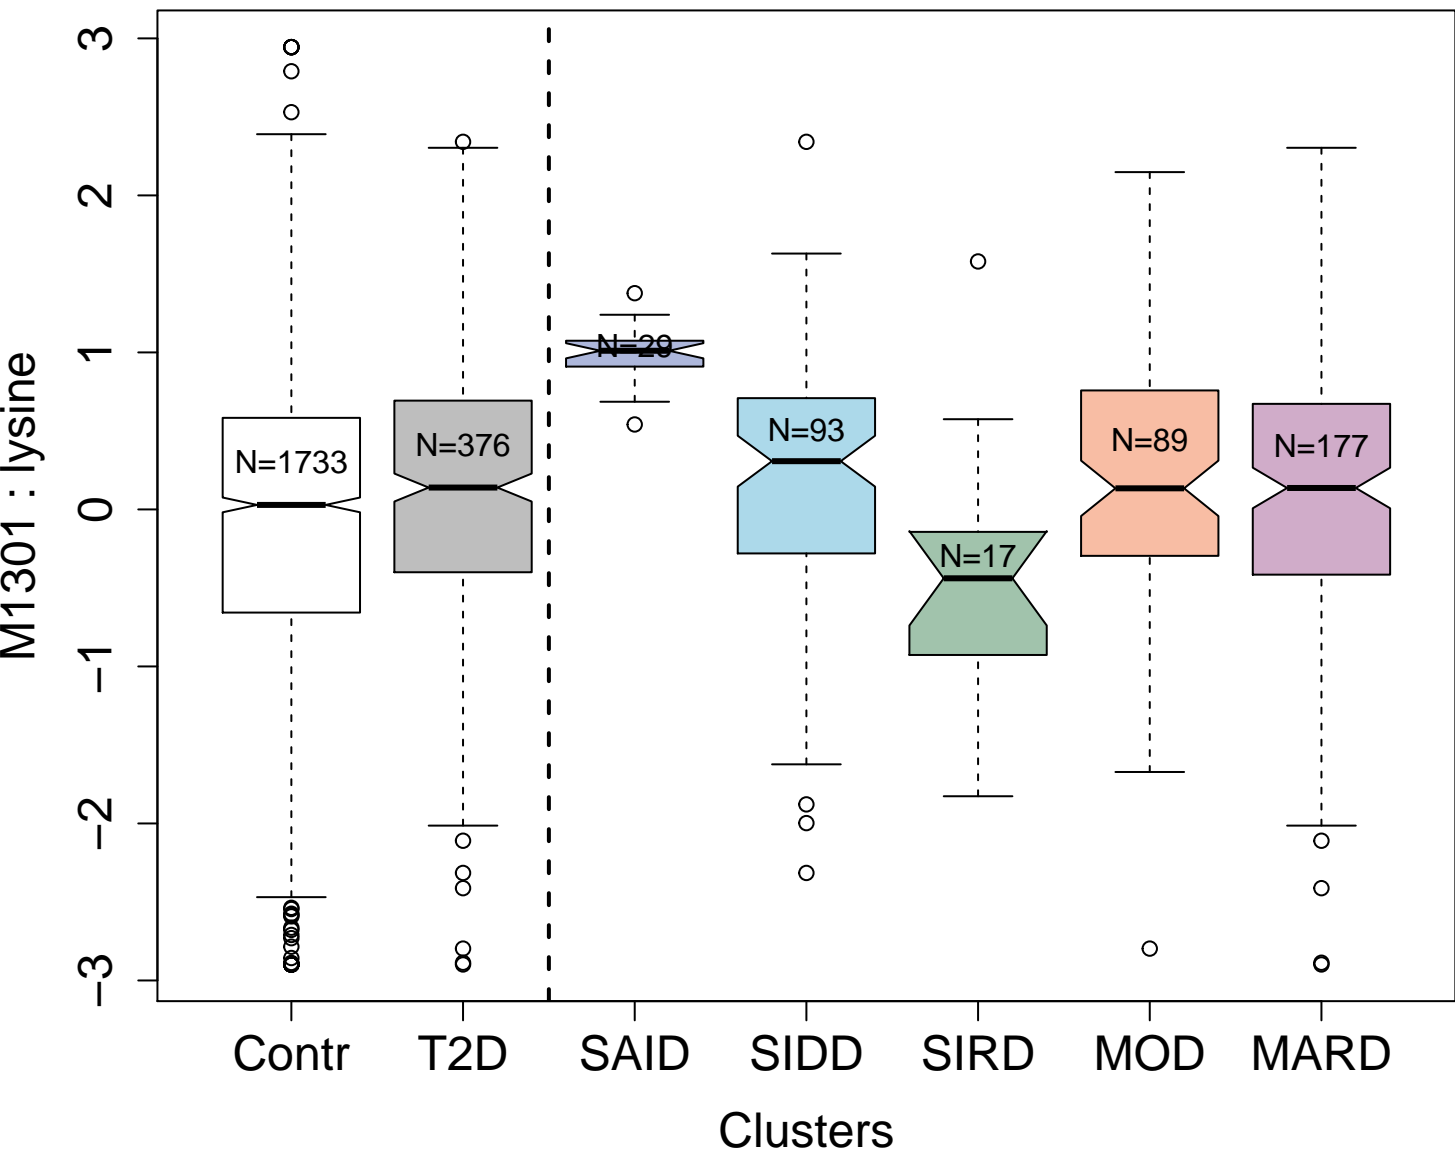

M38100 : betonicine

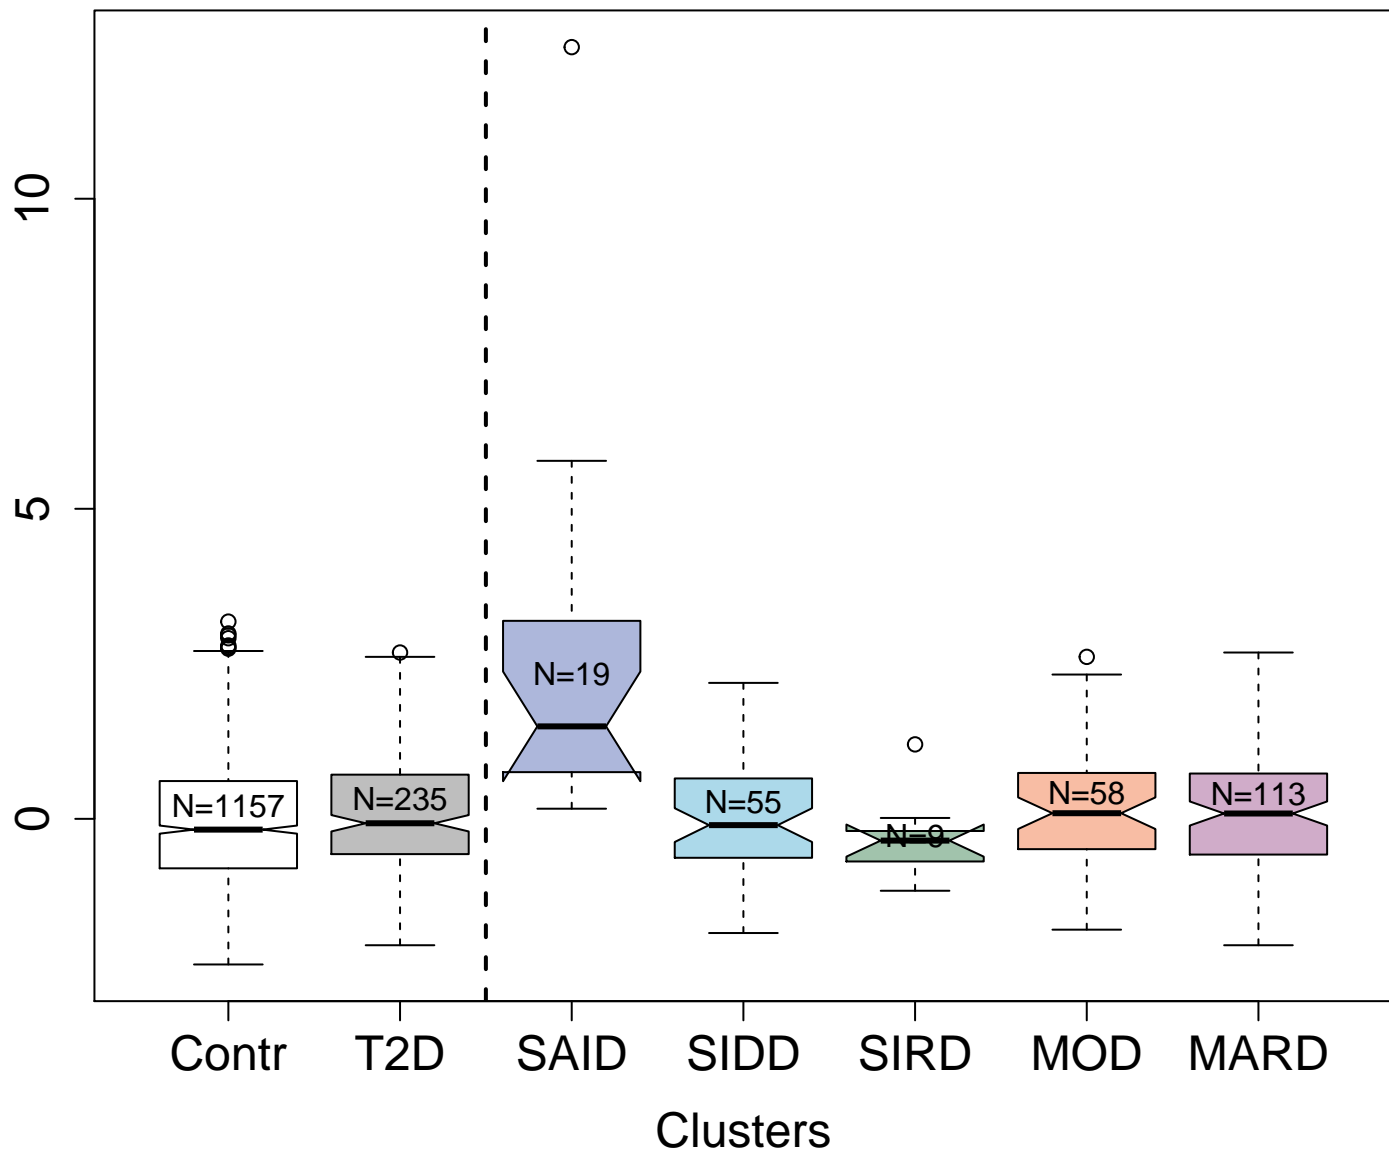

M18394 : theophylline

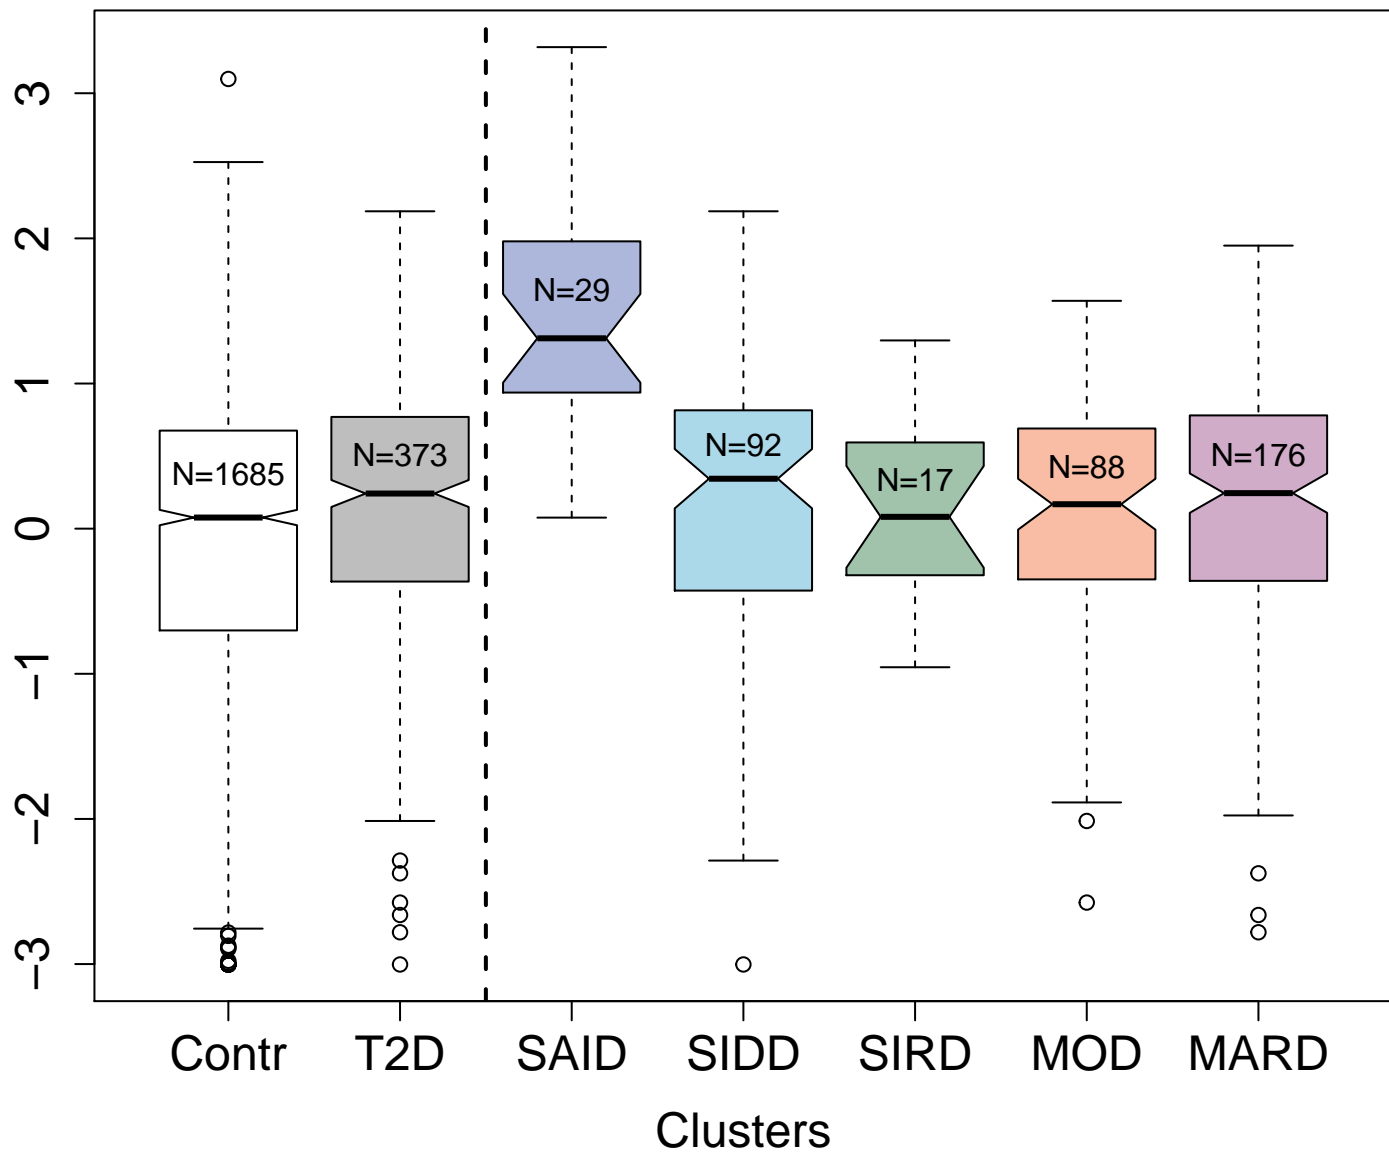

M38395 : 12,13-DiHOME

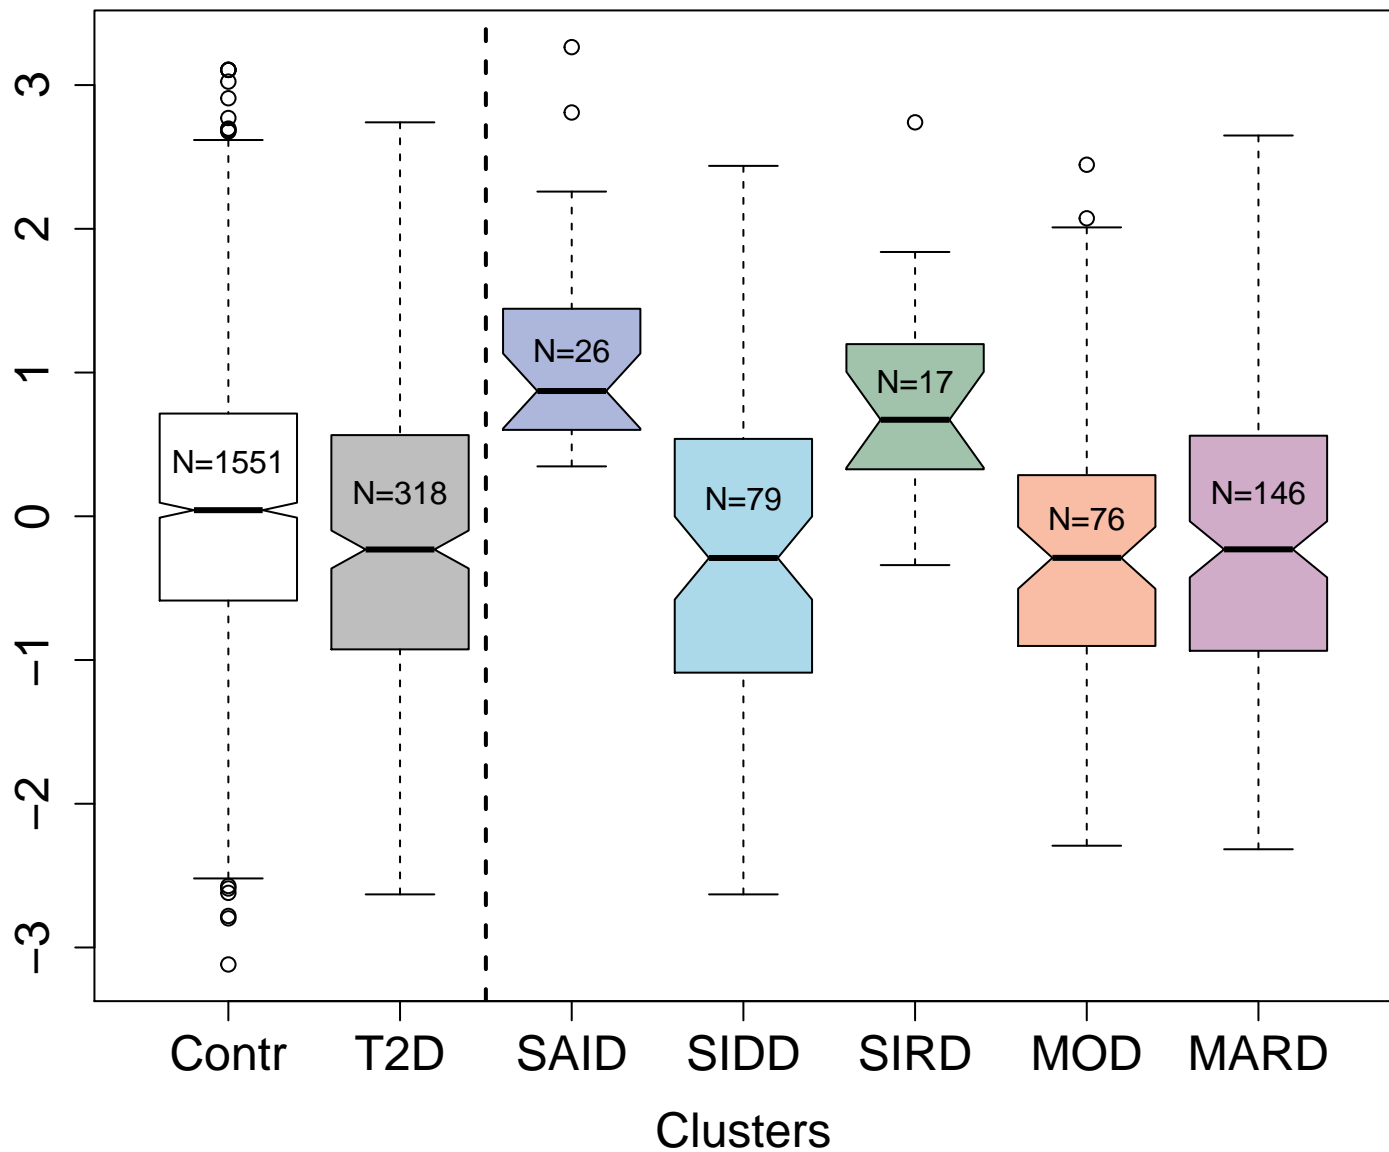

M52467 : 1-palmitoyl-2-arachidonoyl-GPI (16:0/20:4)\*

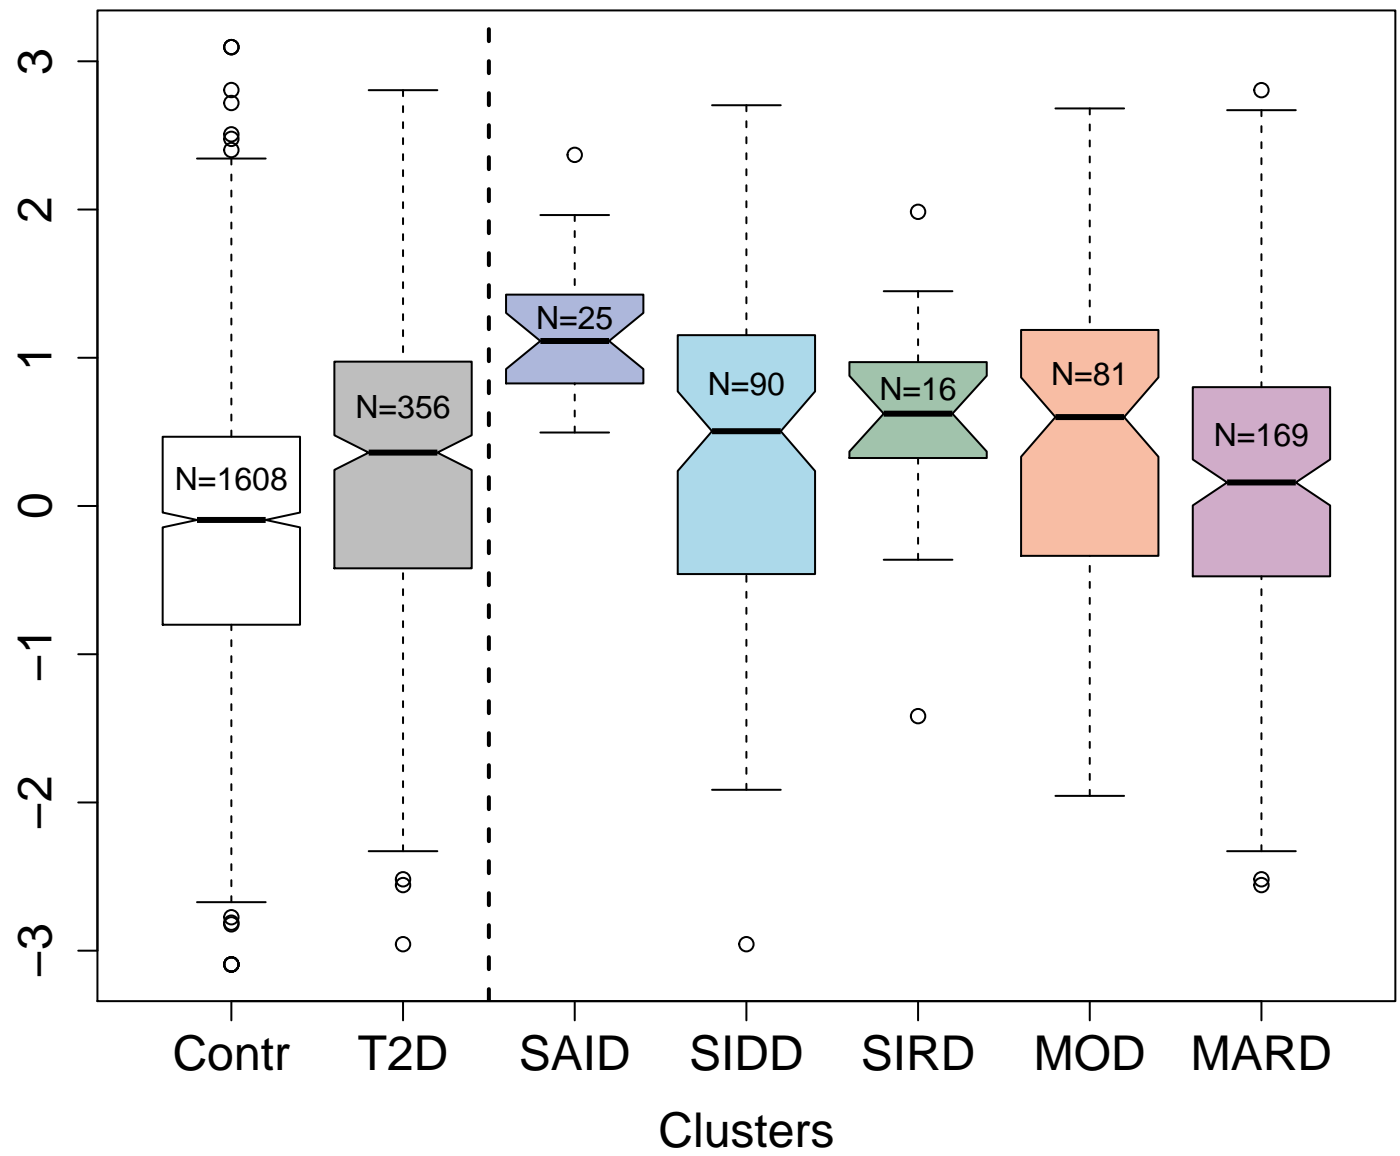

M53176 : 1-linoleoyl-2-linolenoyl-GPC (18:2/18:3)\*

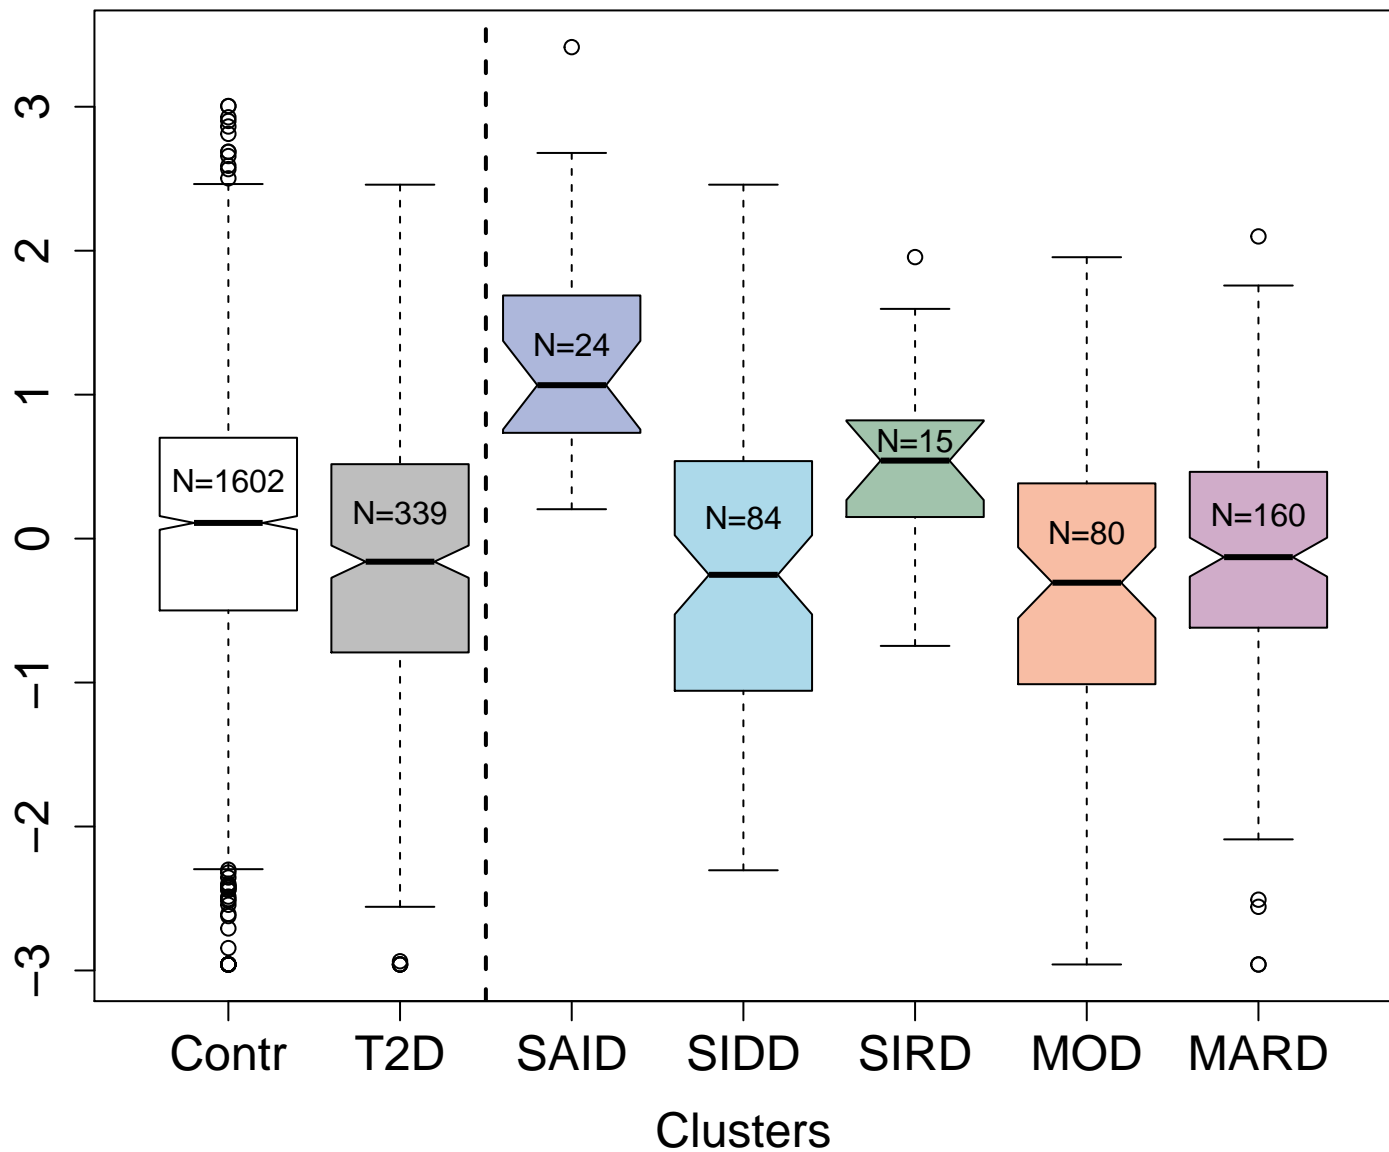

M1437 : succinate

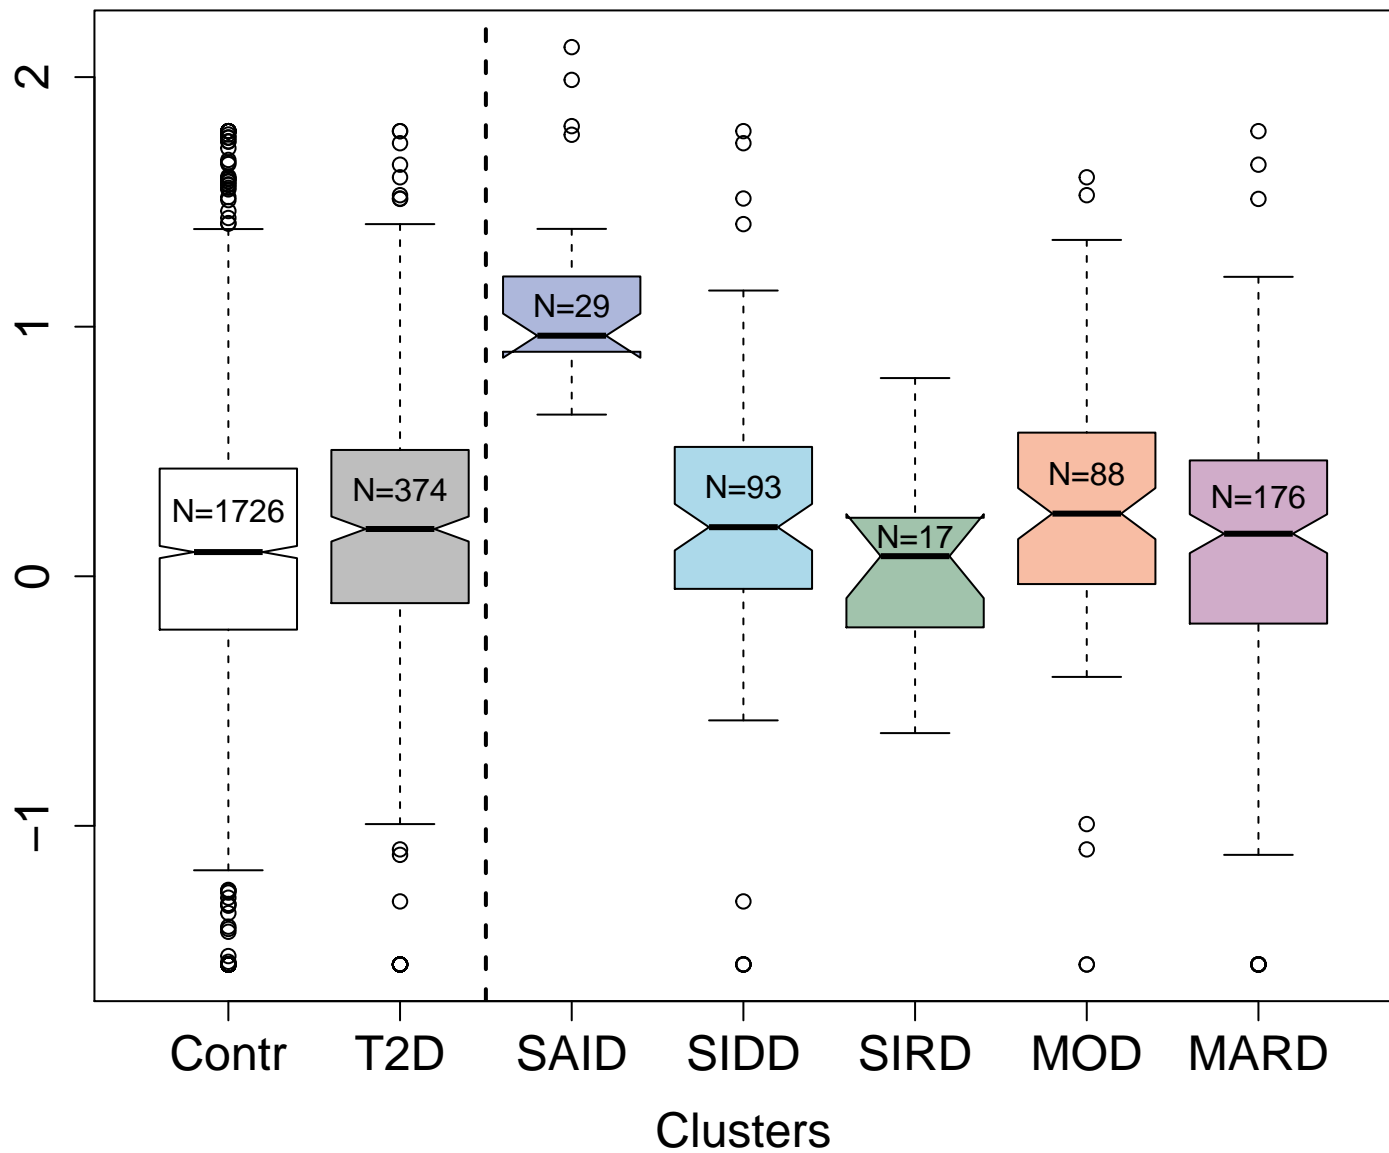

M46624 : X - 12798

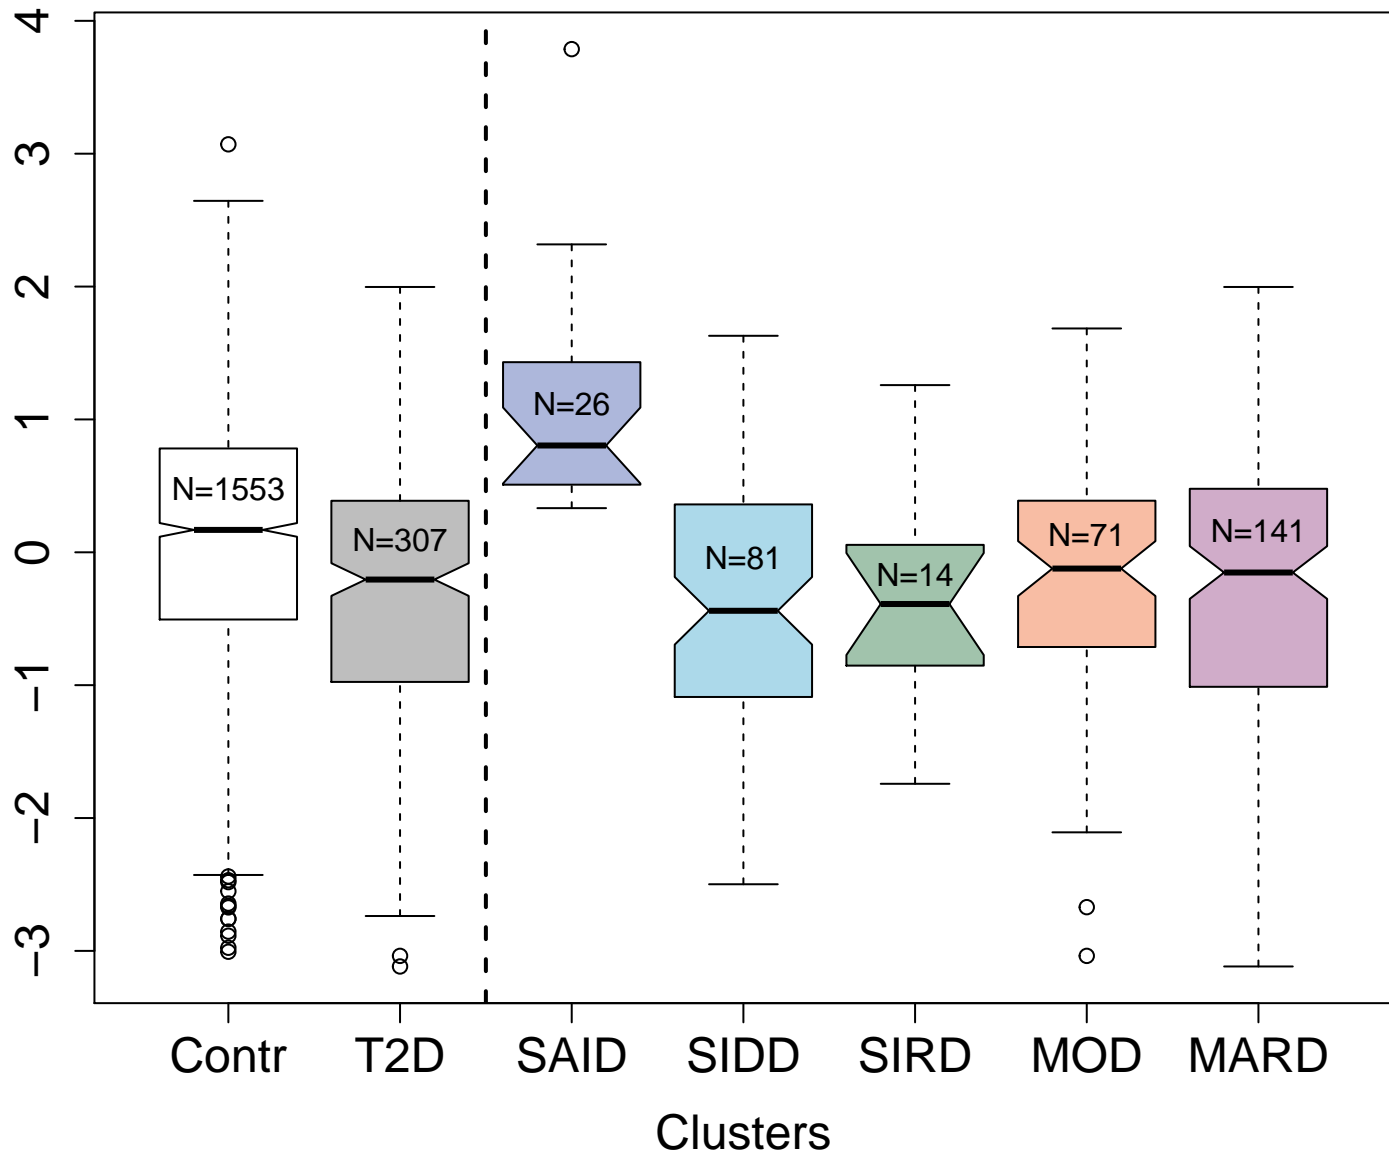



M33947 : gamma-glutamyltryptophan

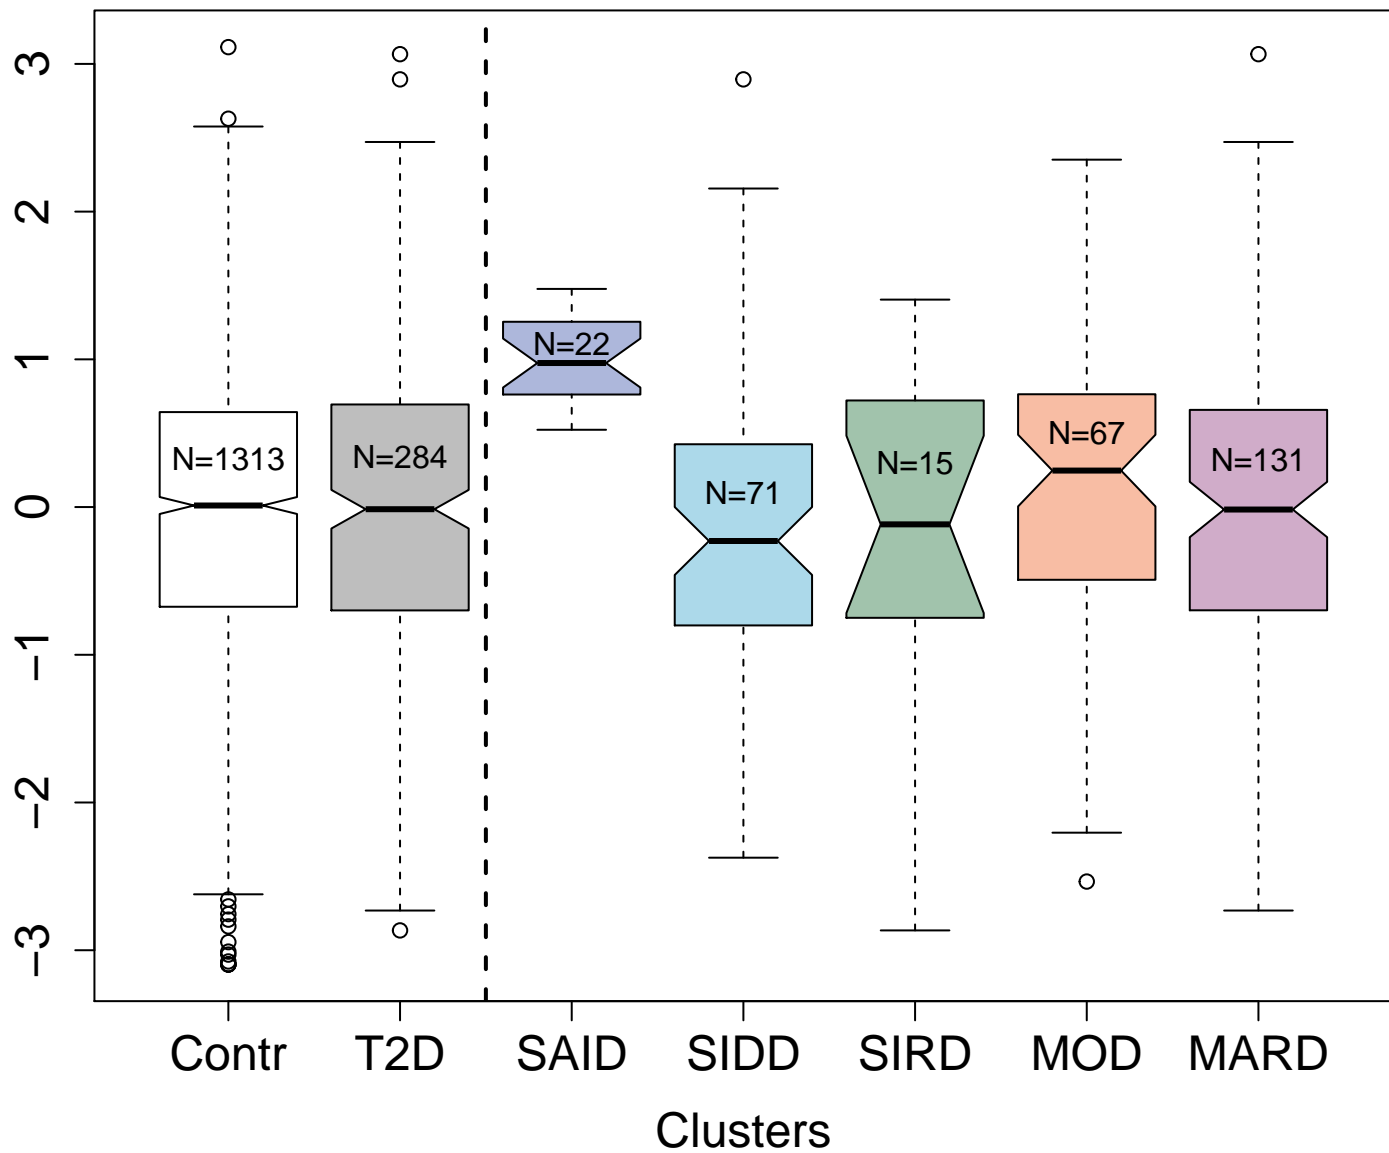

M57714: X - 24947

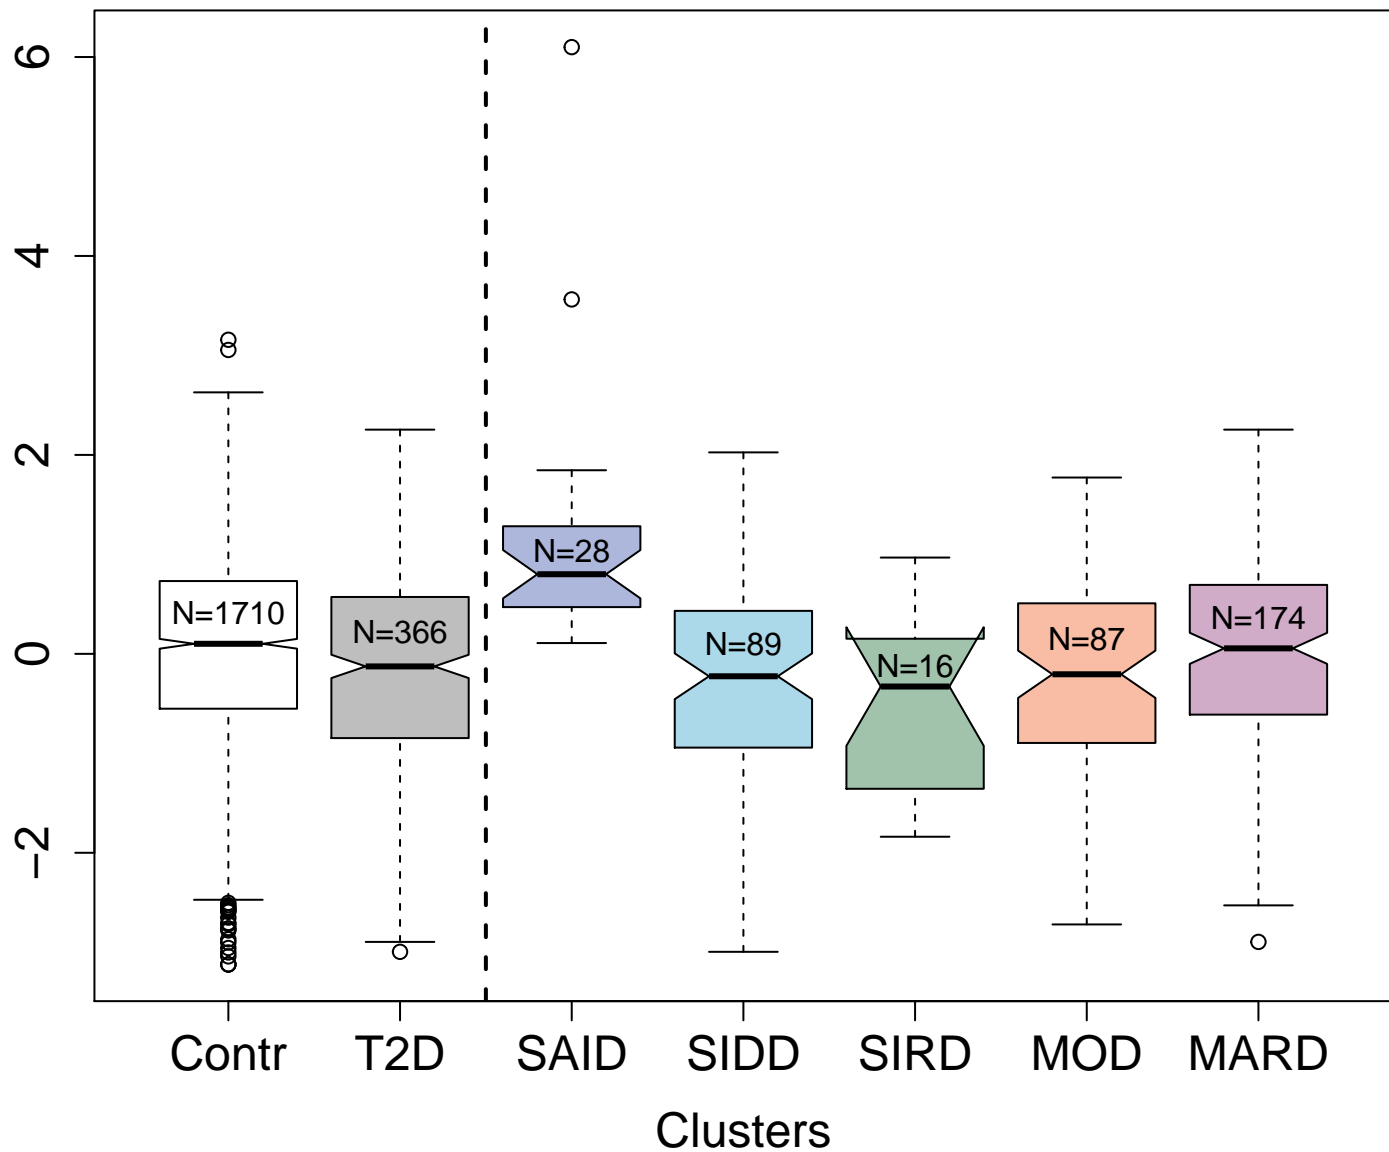

M37445 : 4-hydroxycoumarin

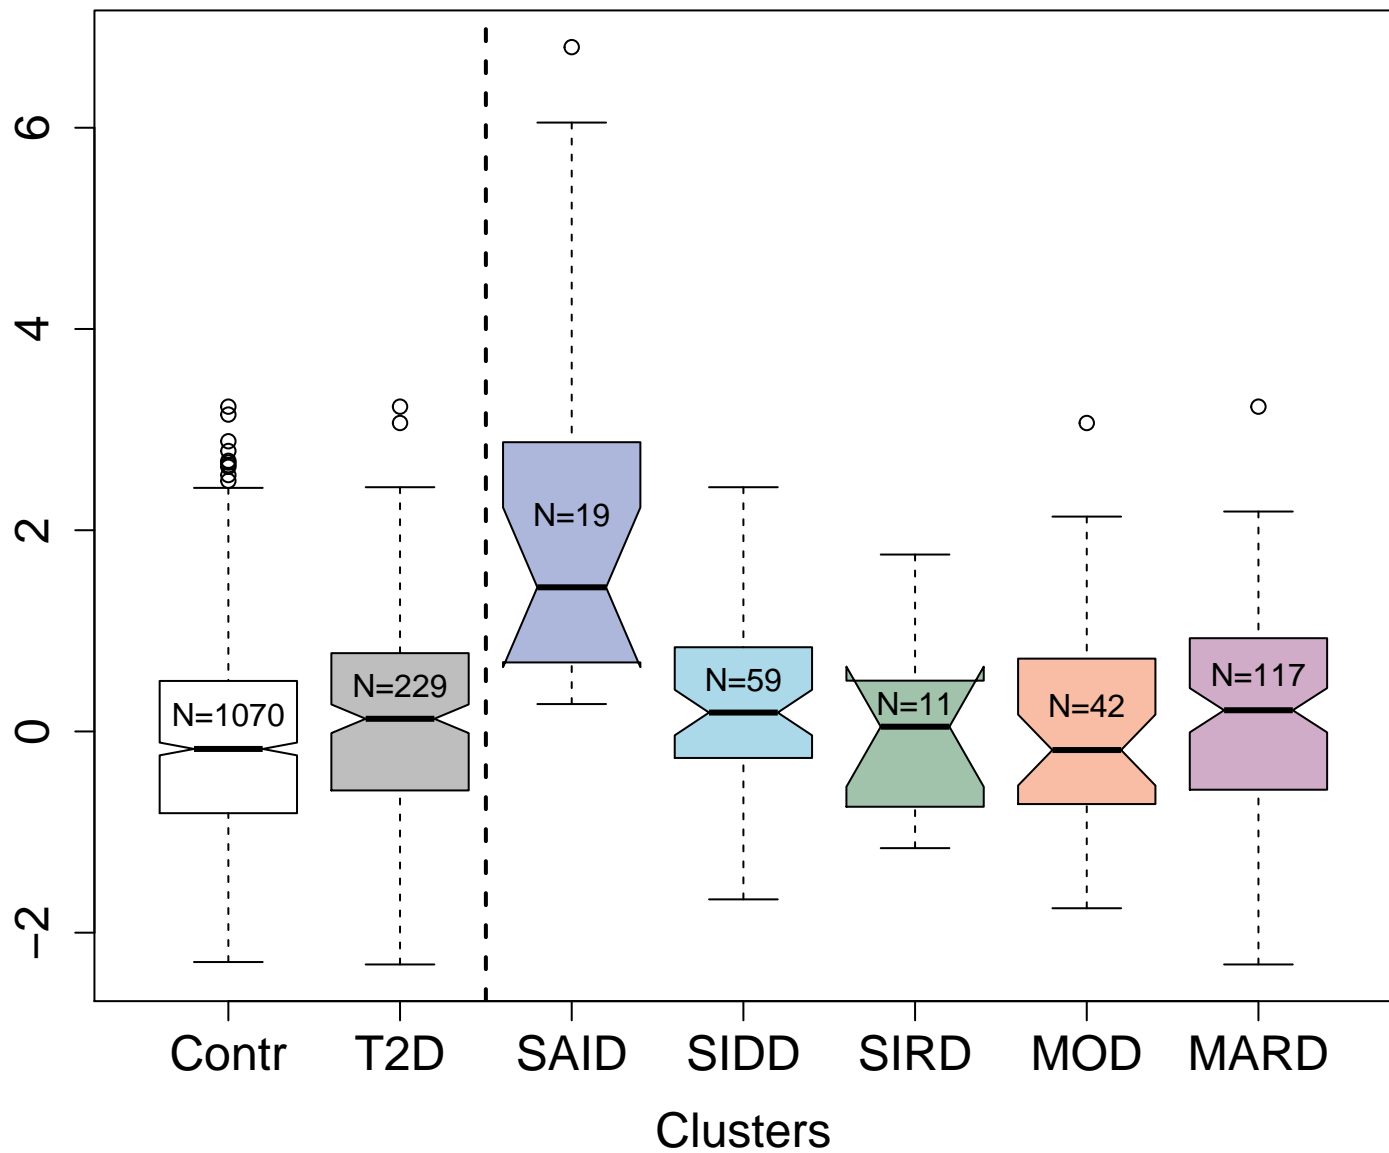

M46686 : X - 17137

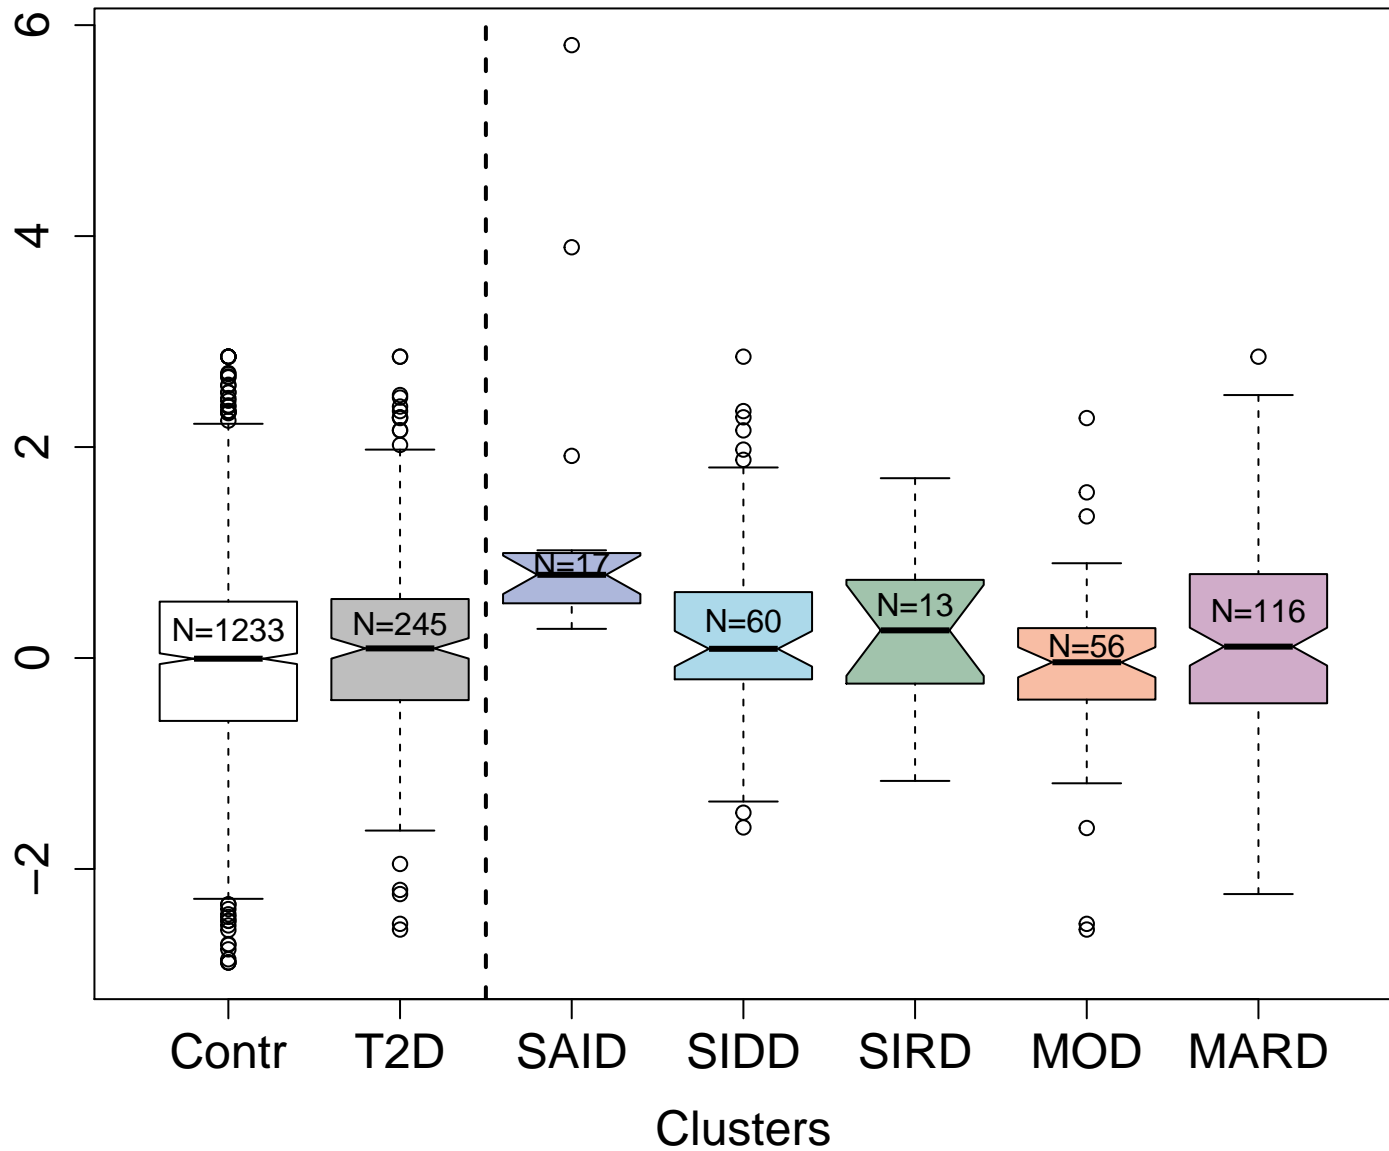

M62719: X - 25422

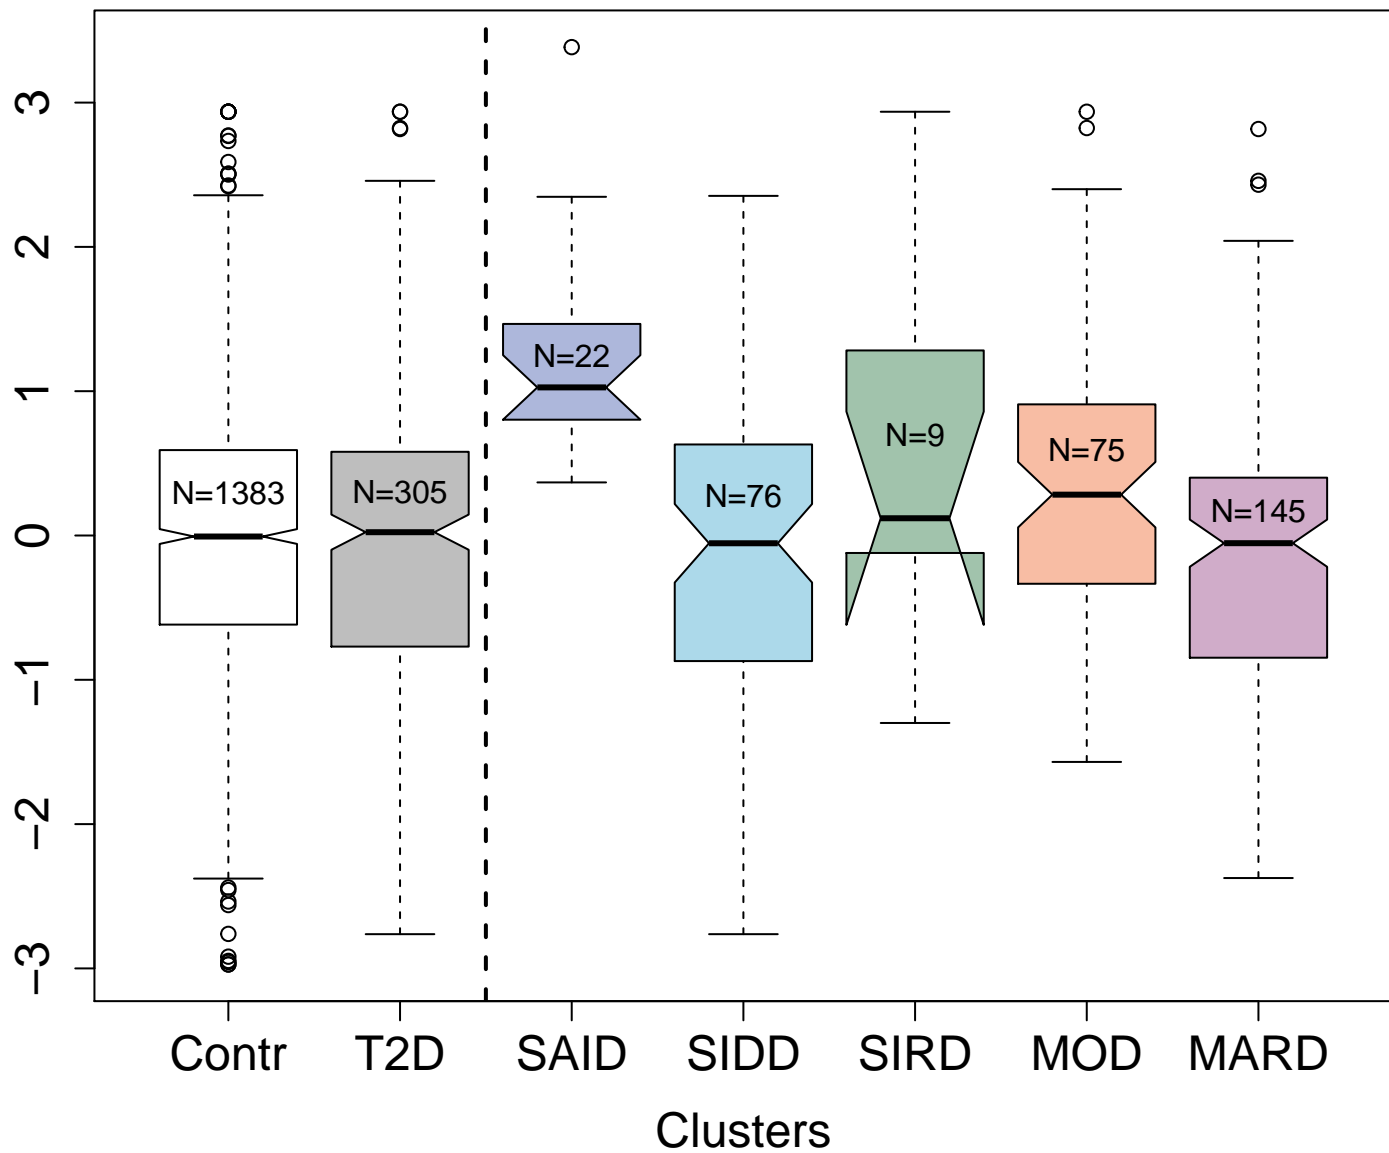

M40406 : trimethylamine N-oxide

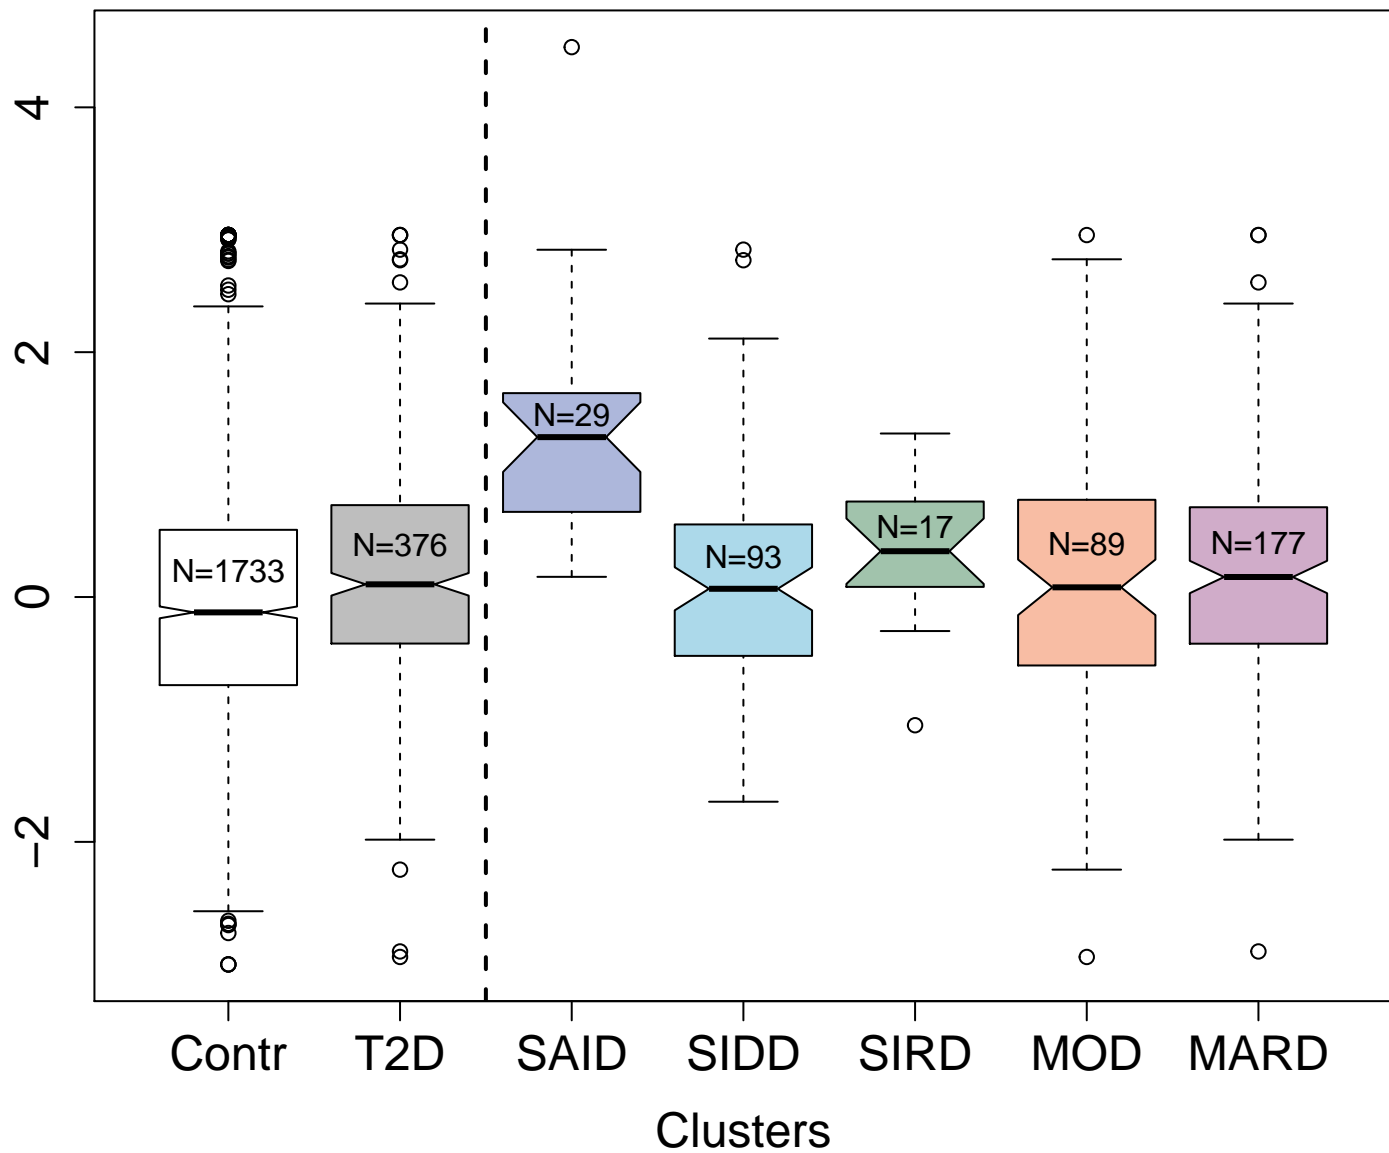

M34456 : gamma-glutamylisoleucine\*

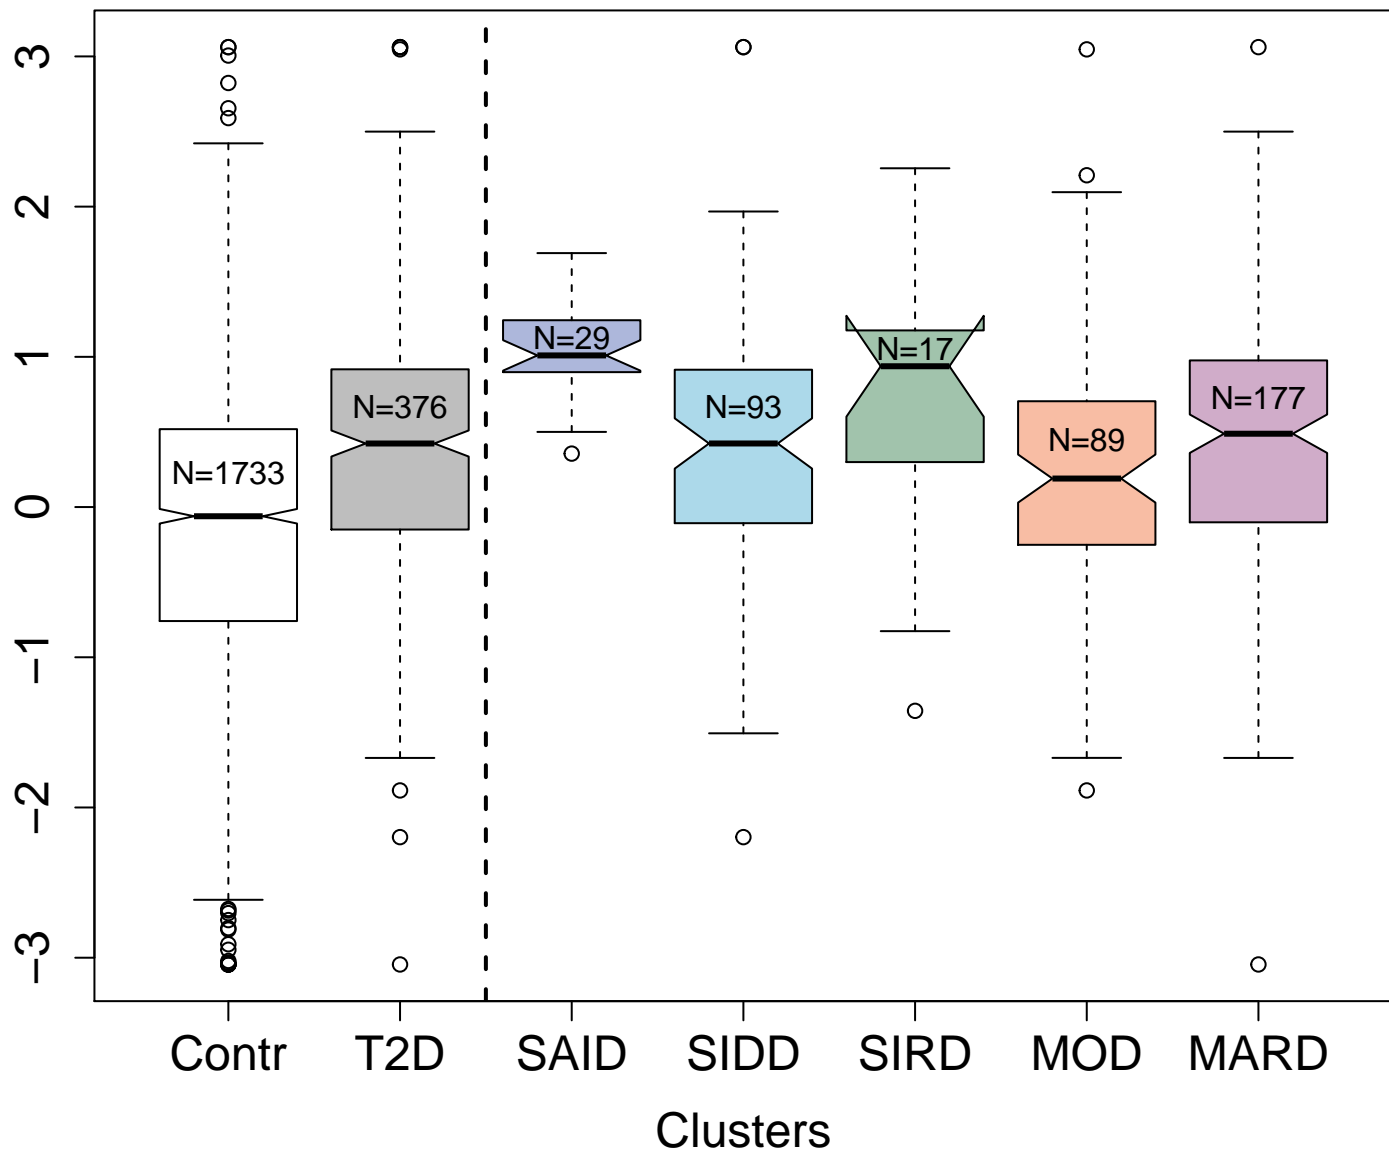

M35665 : N-acetyl-aspartyl-glutamate (NAAG)

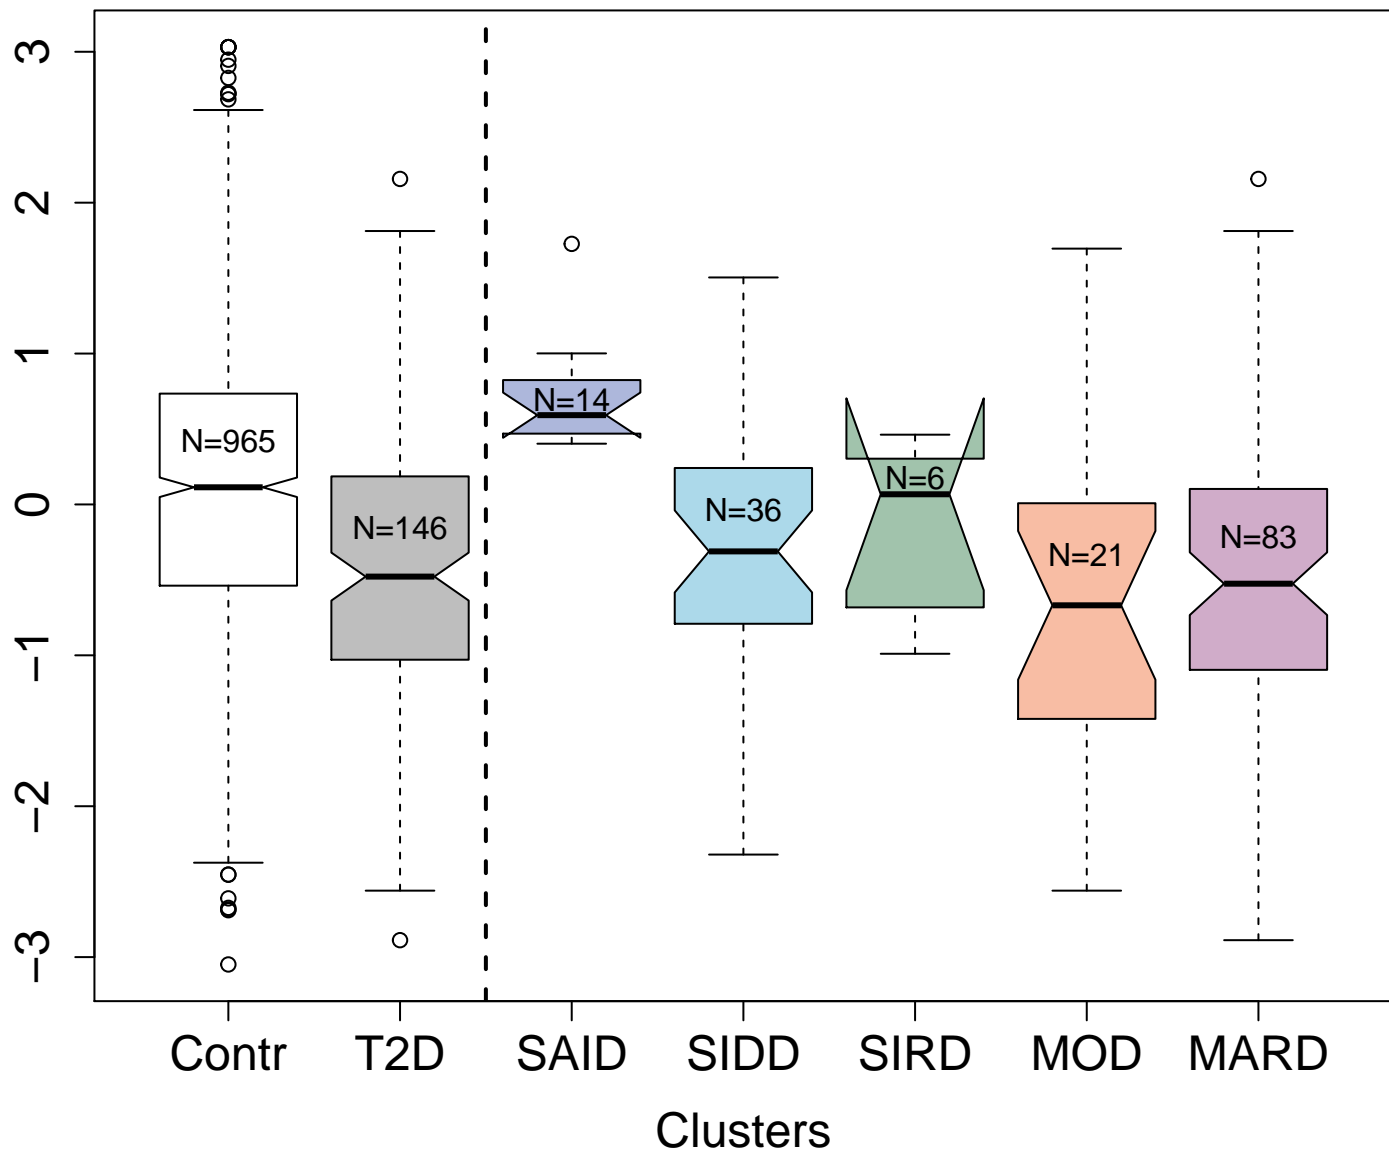



M57636 : carotene diol (2)

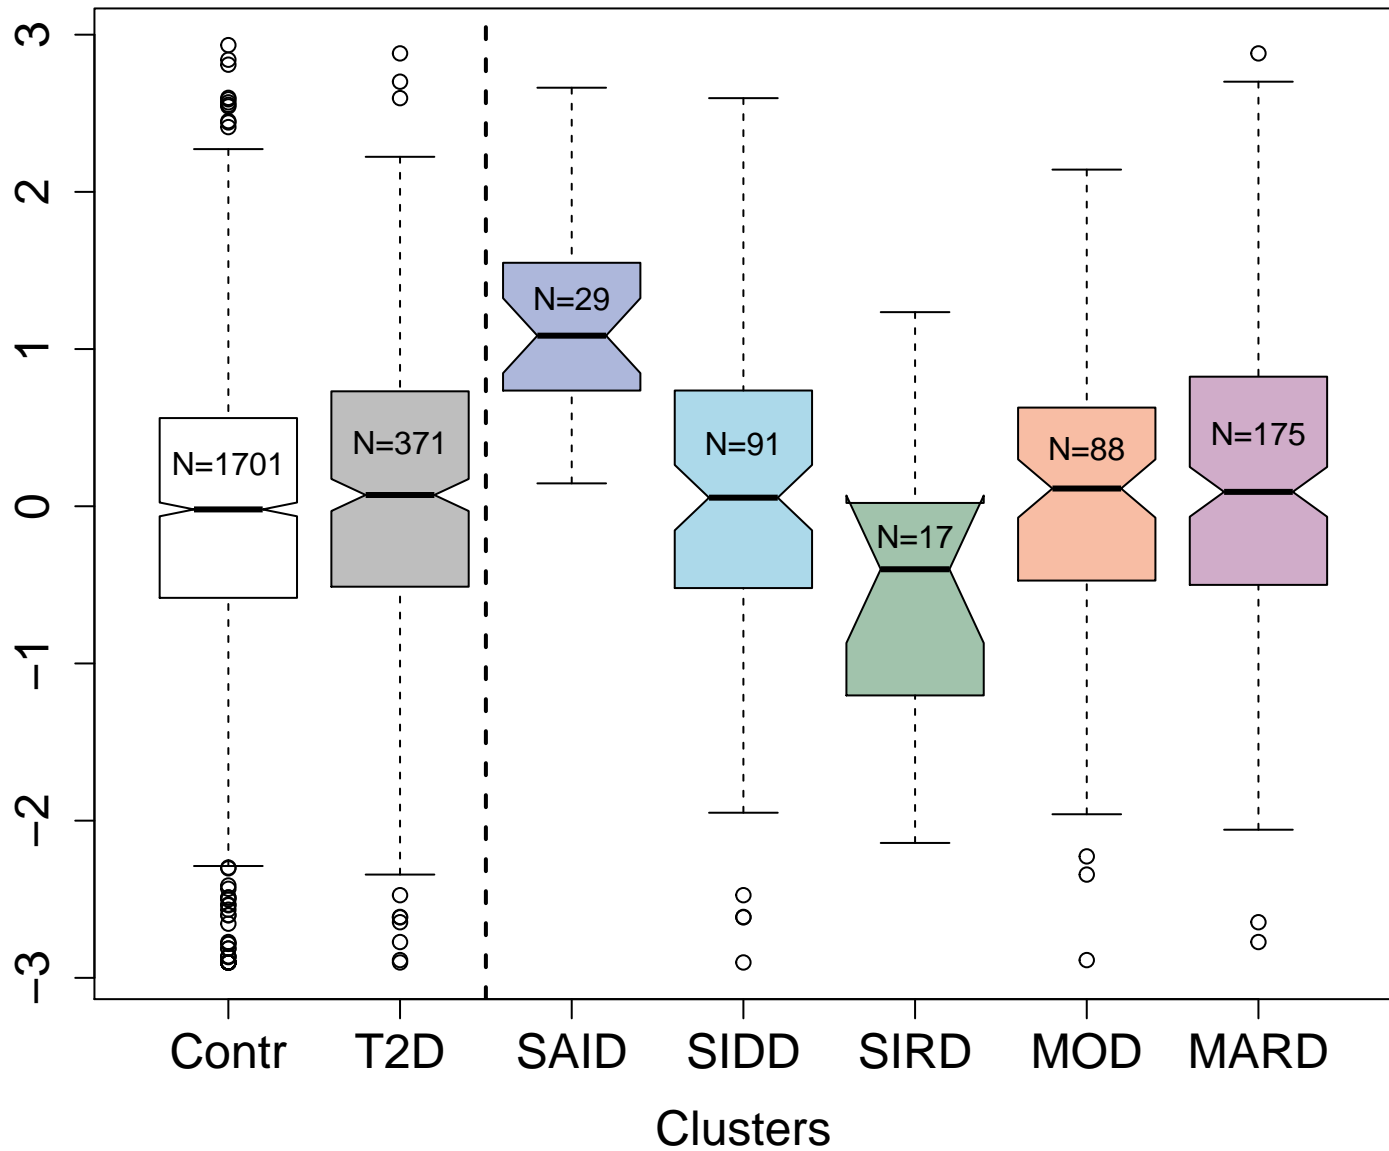

M35527 : 4-hydroxyhippurate

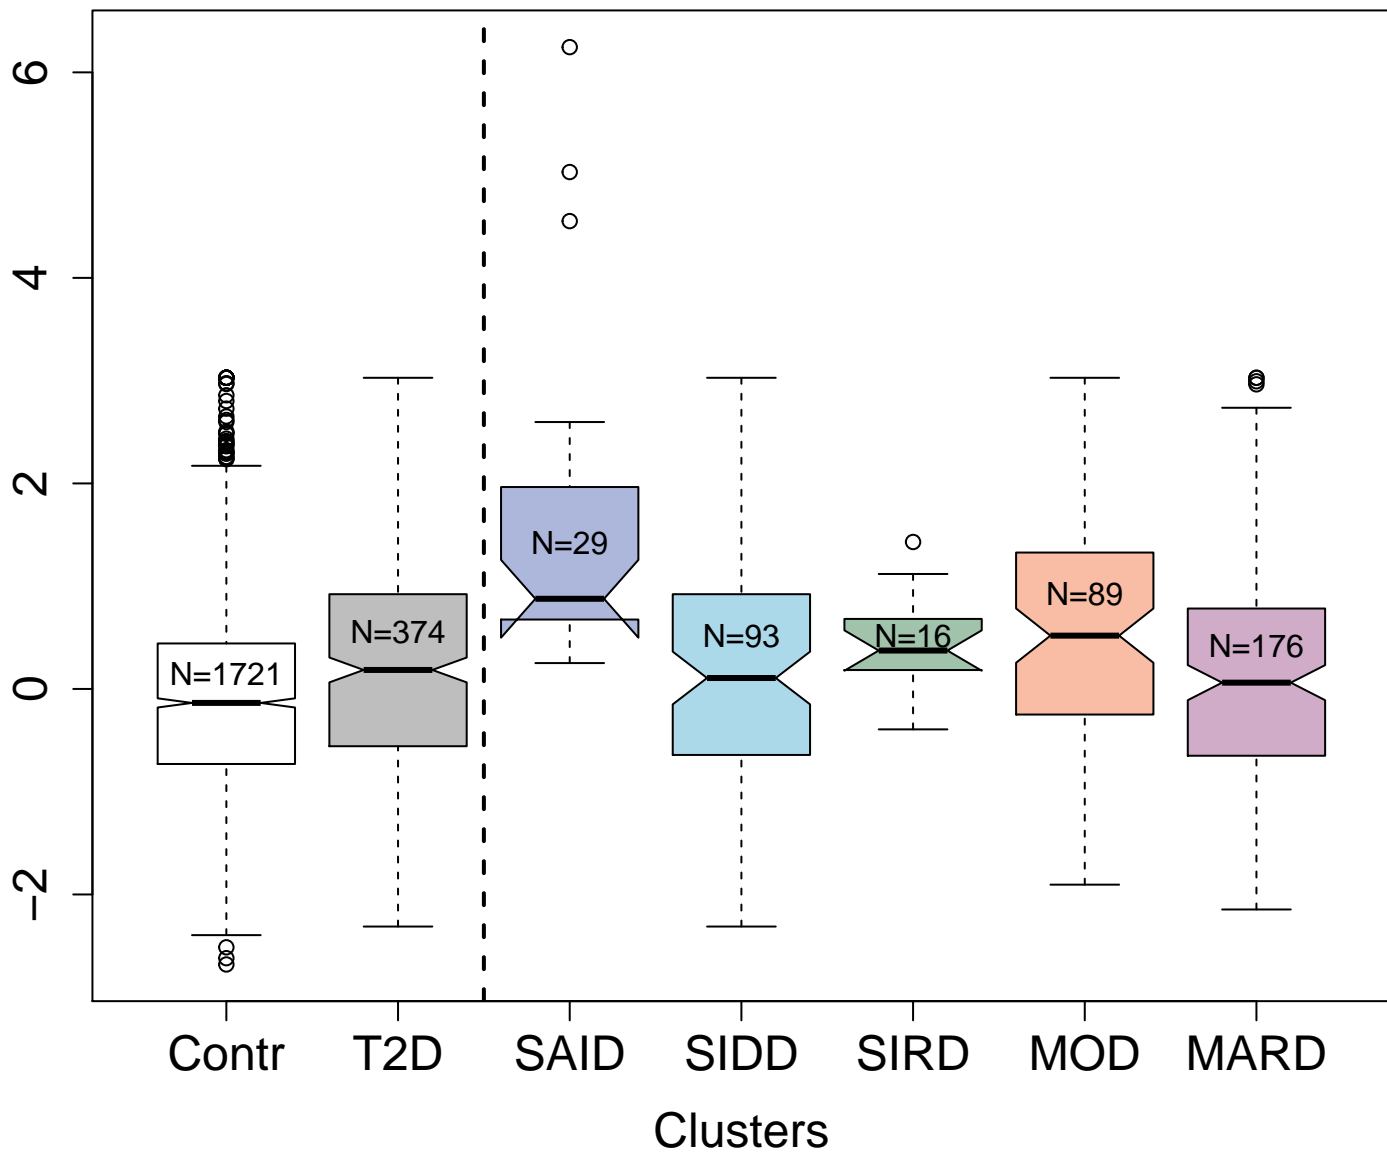

M39831 : eicosanedioate (C20-DC)

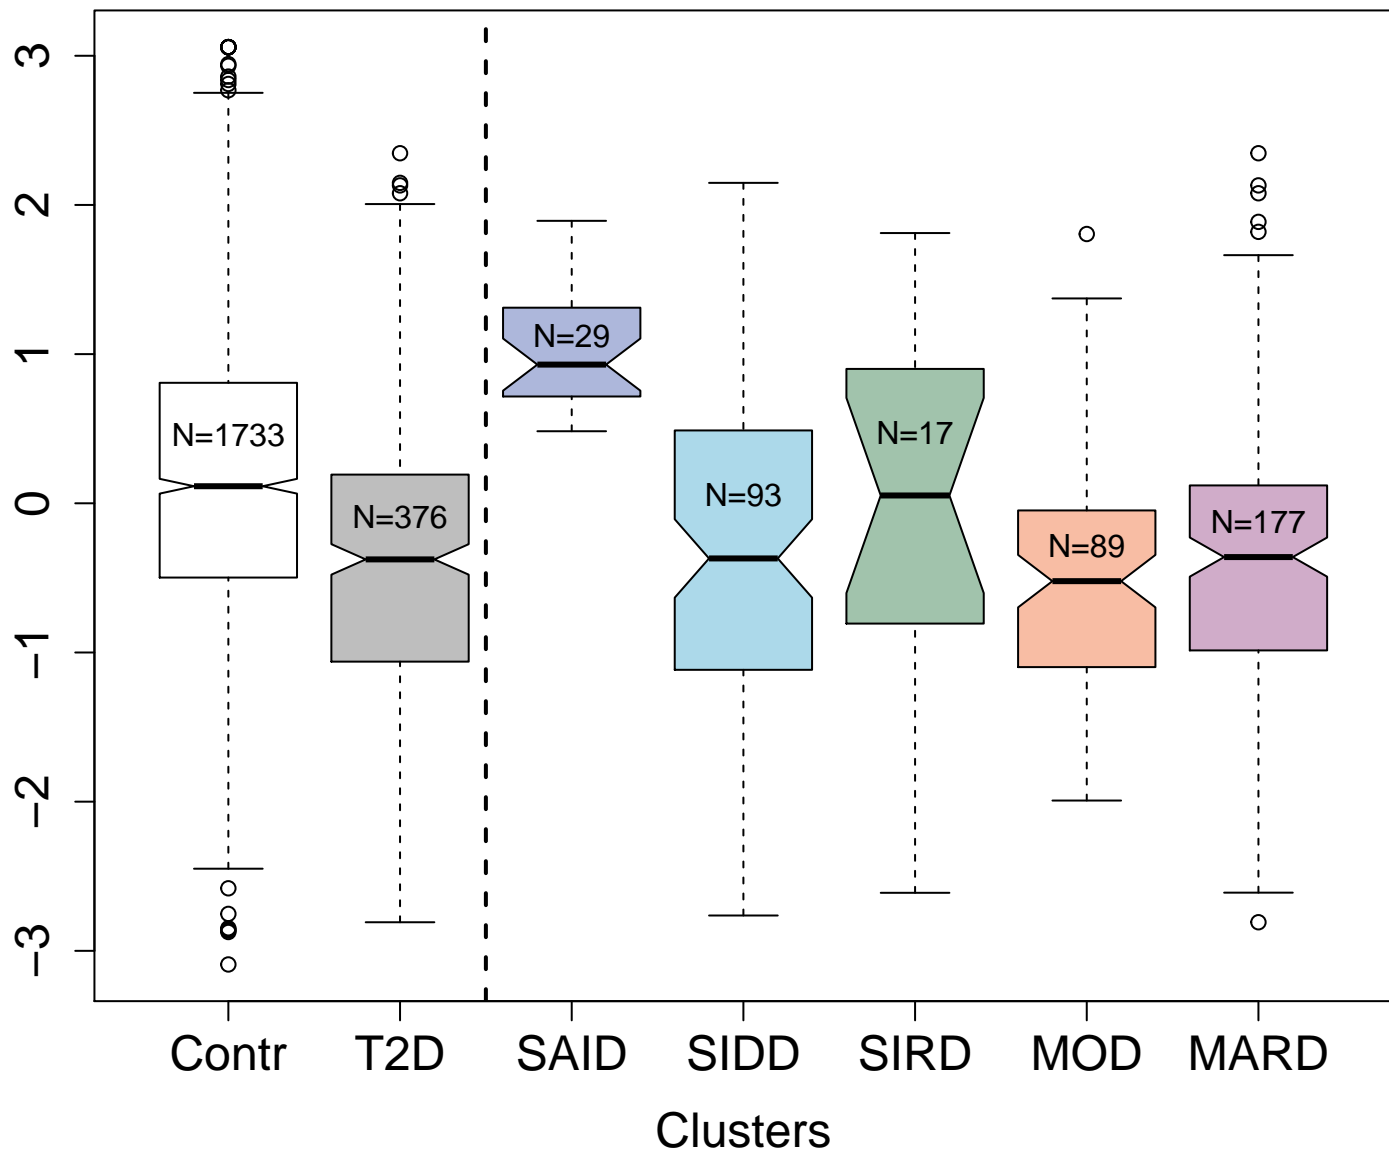

M15745 : methylsuccinate

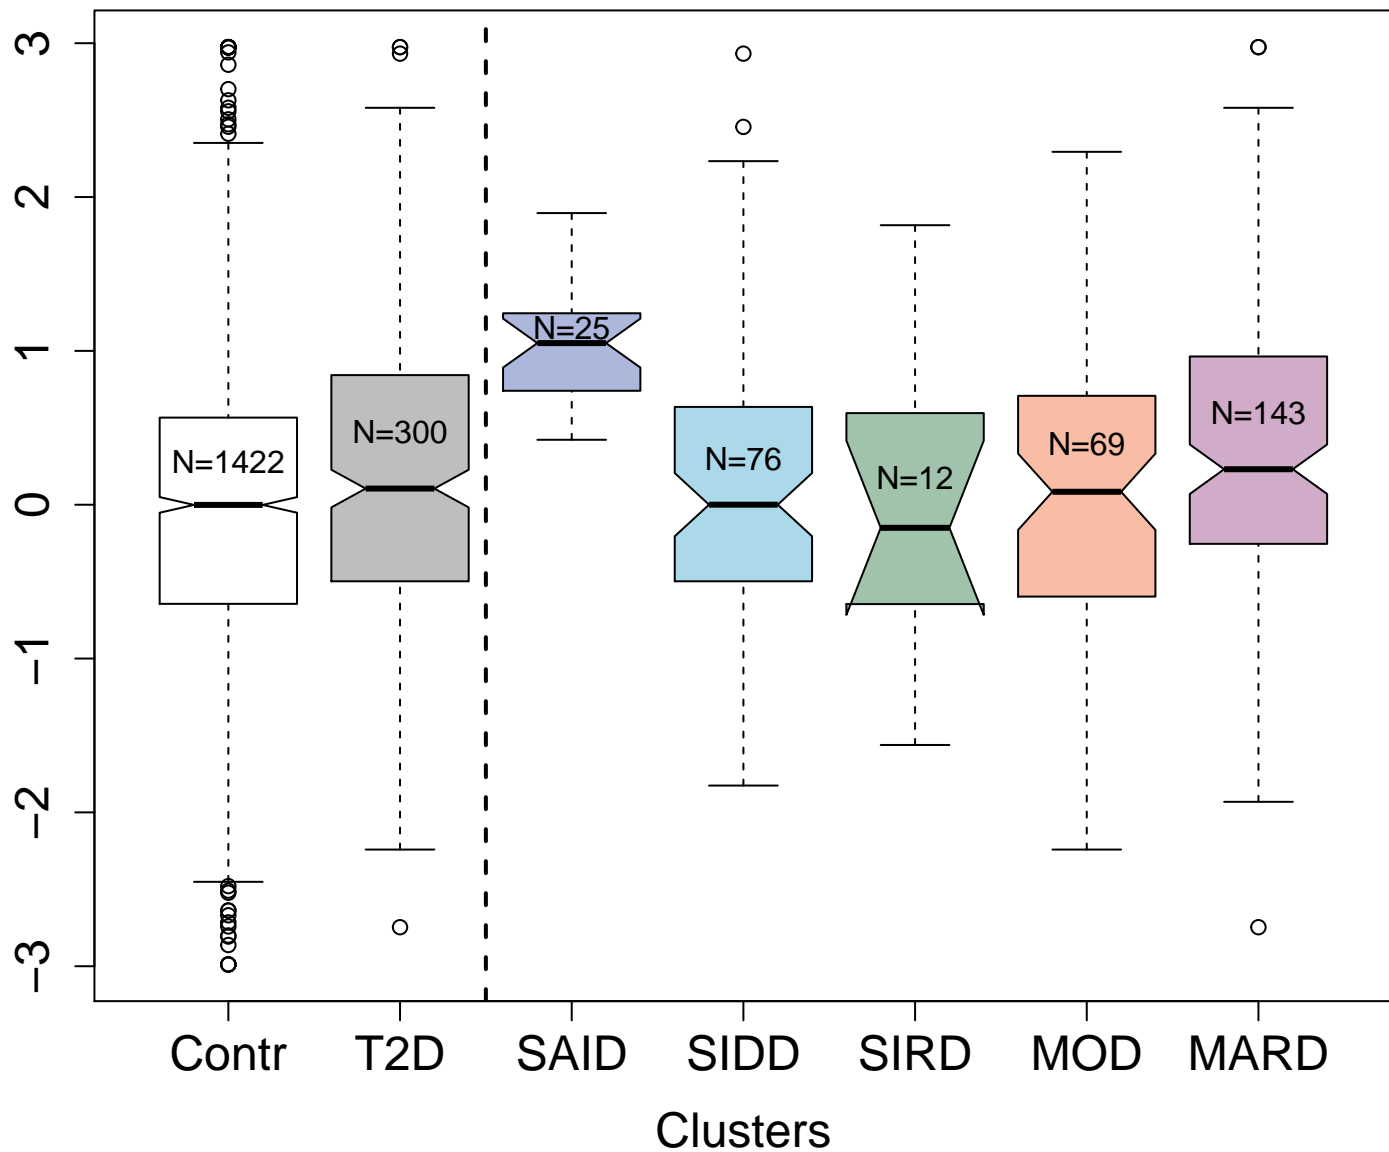

M48492 : behenoyl sphingomyelin (d18:1/22:0)\*

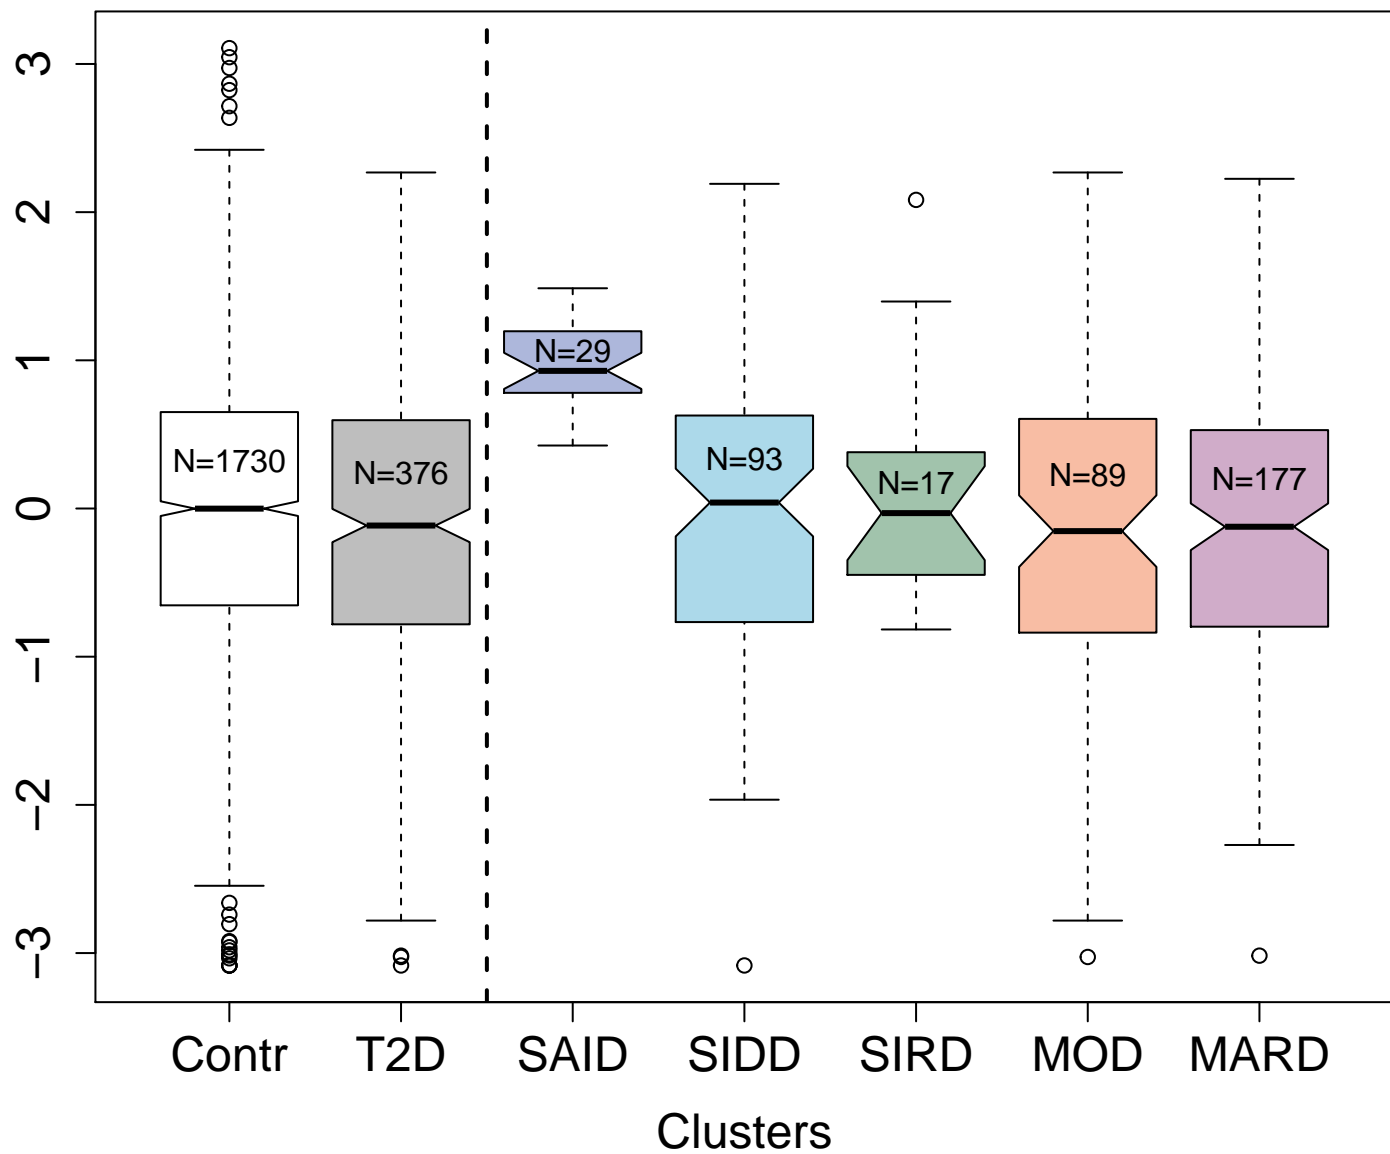

M63610 : deoxycholic acid glucuronide

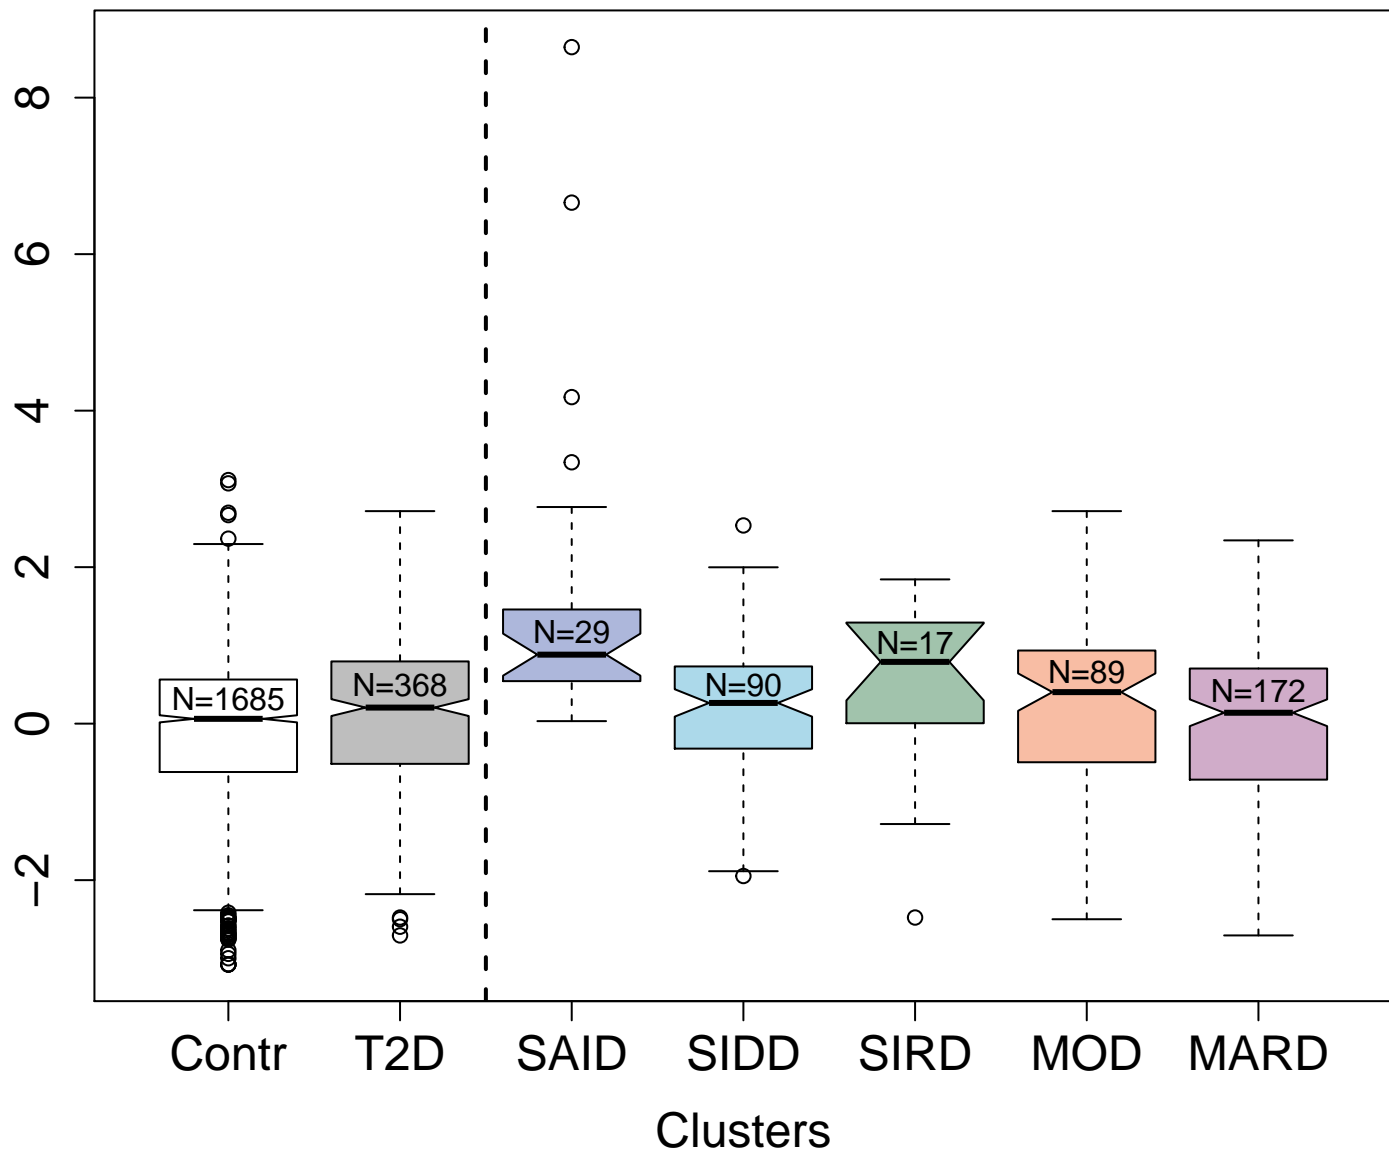

M62062 : 3-hydroxystachydrine\*

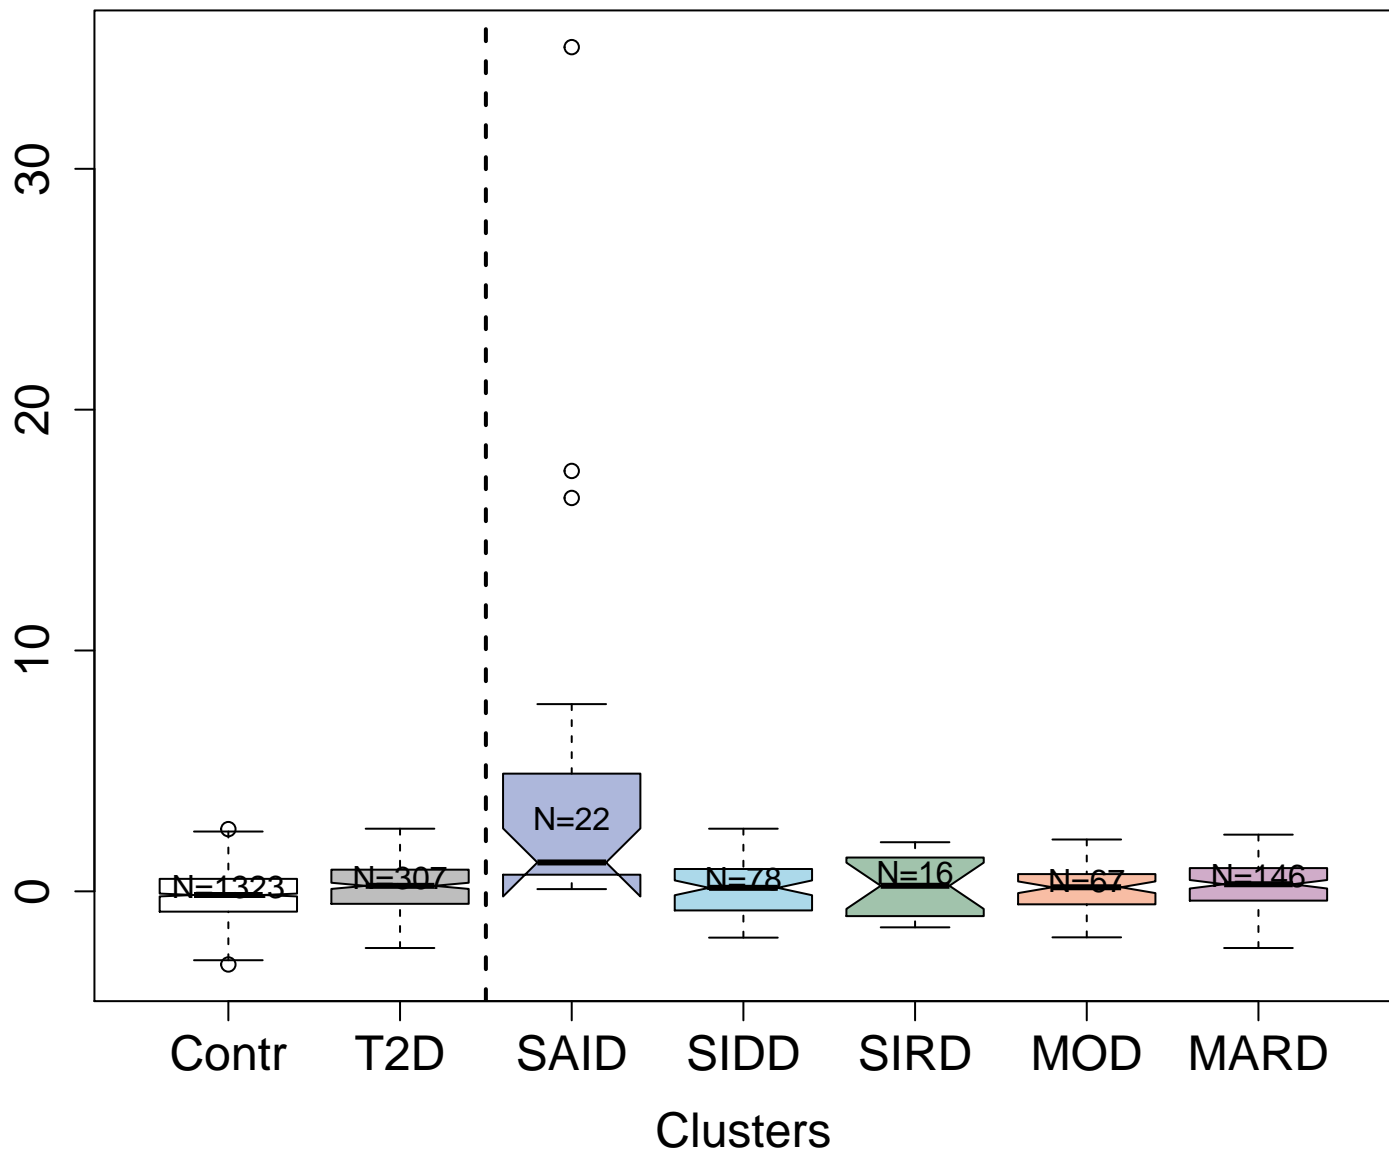

M55 : beta-alanine

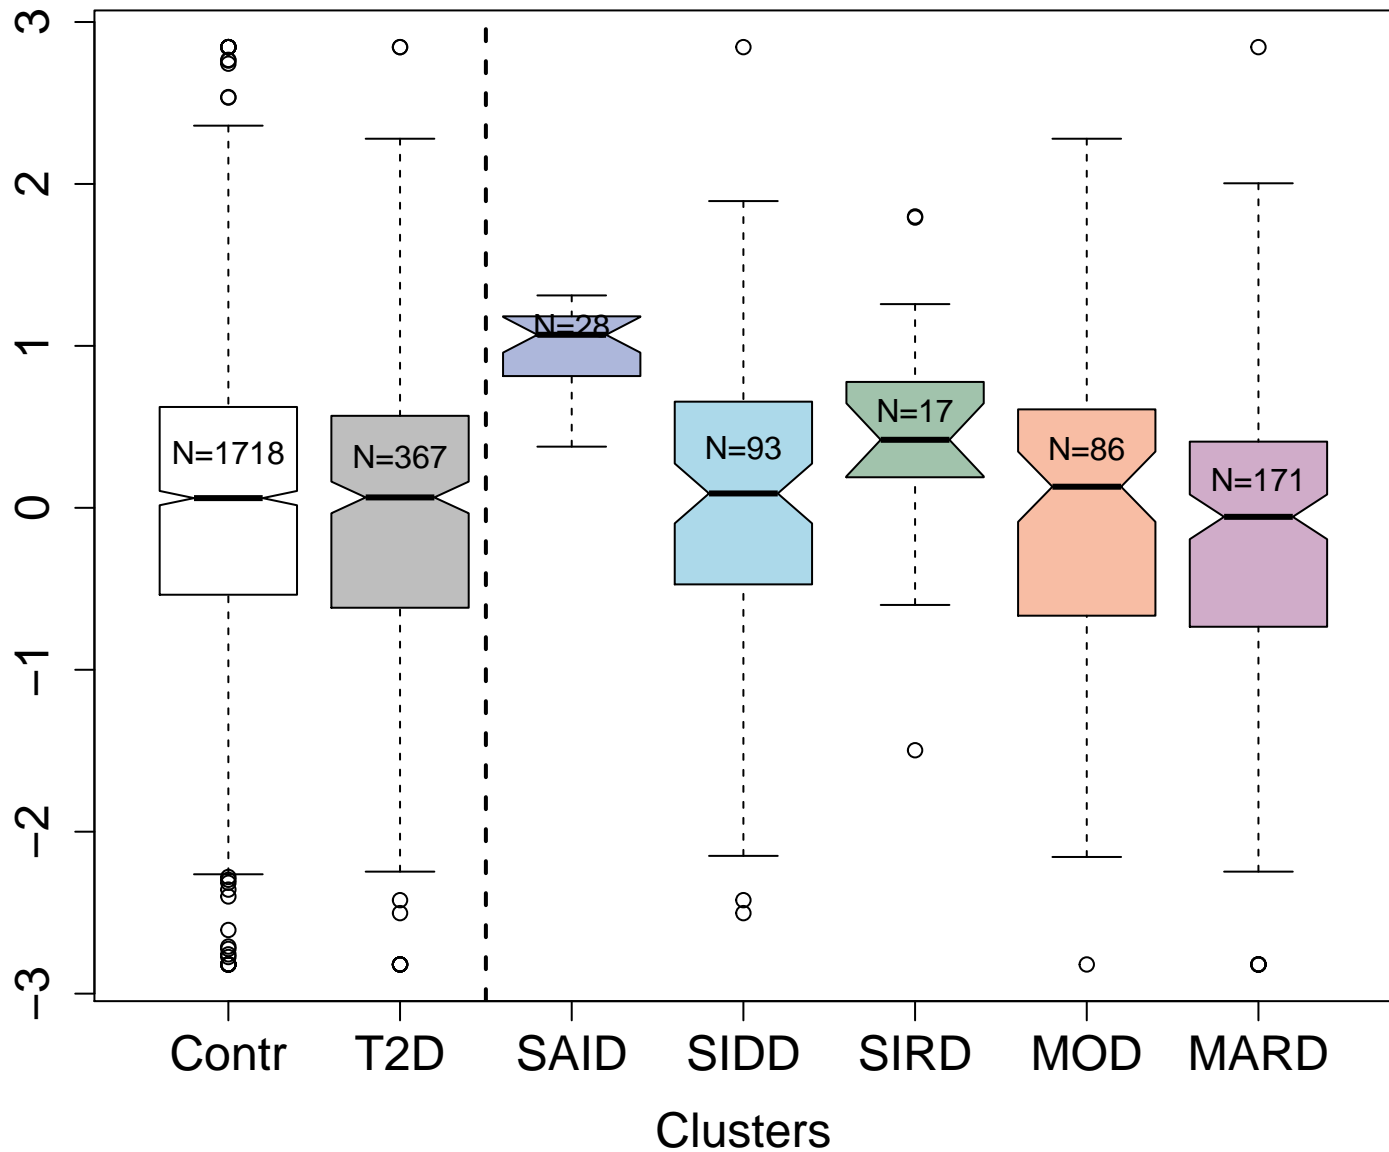



M39379 : glycoorseoexychoilate

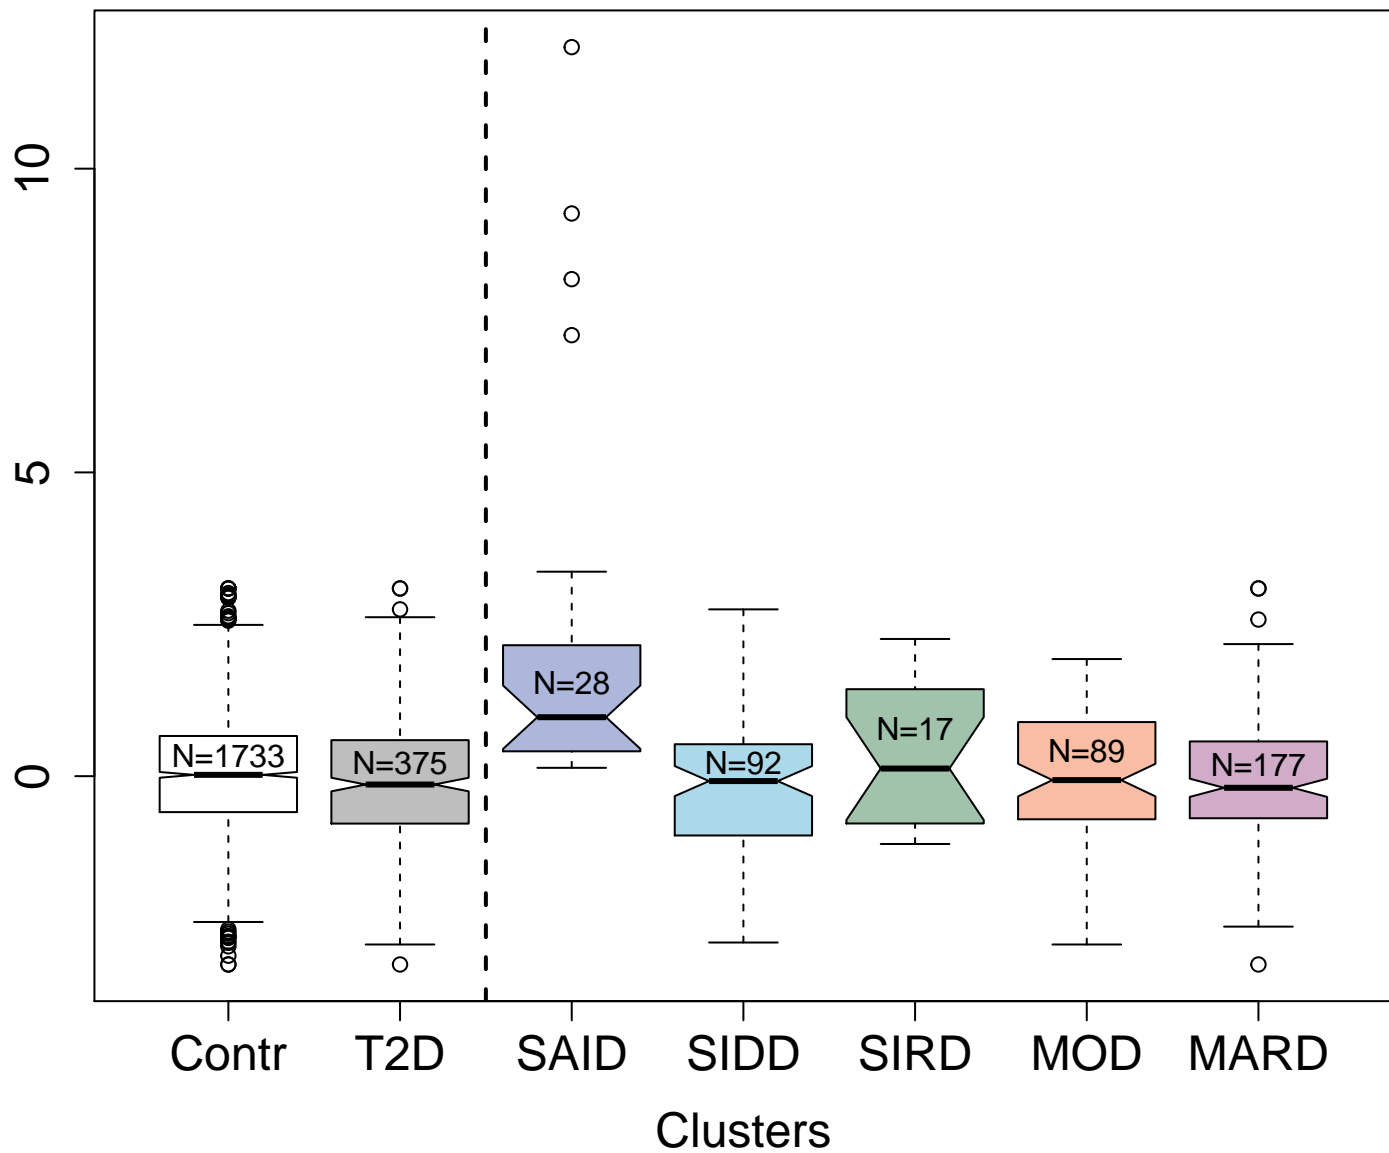

M56 : cystine

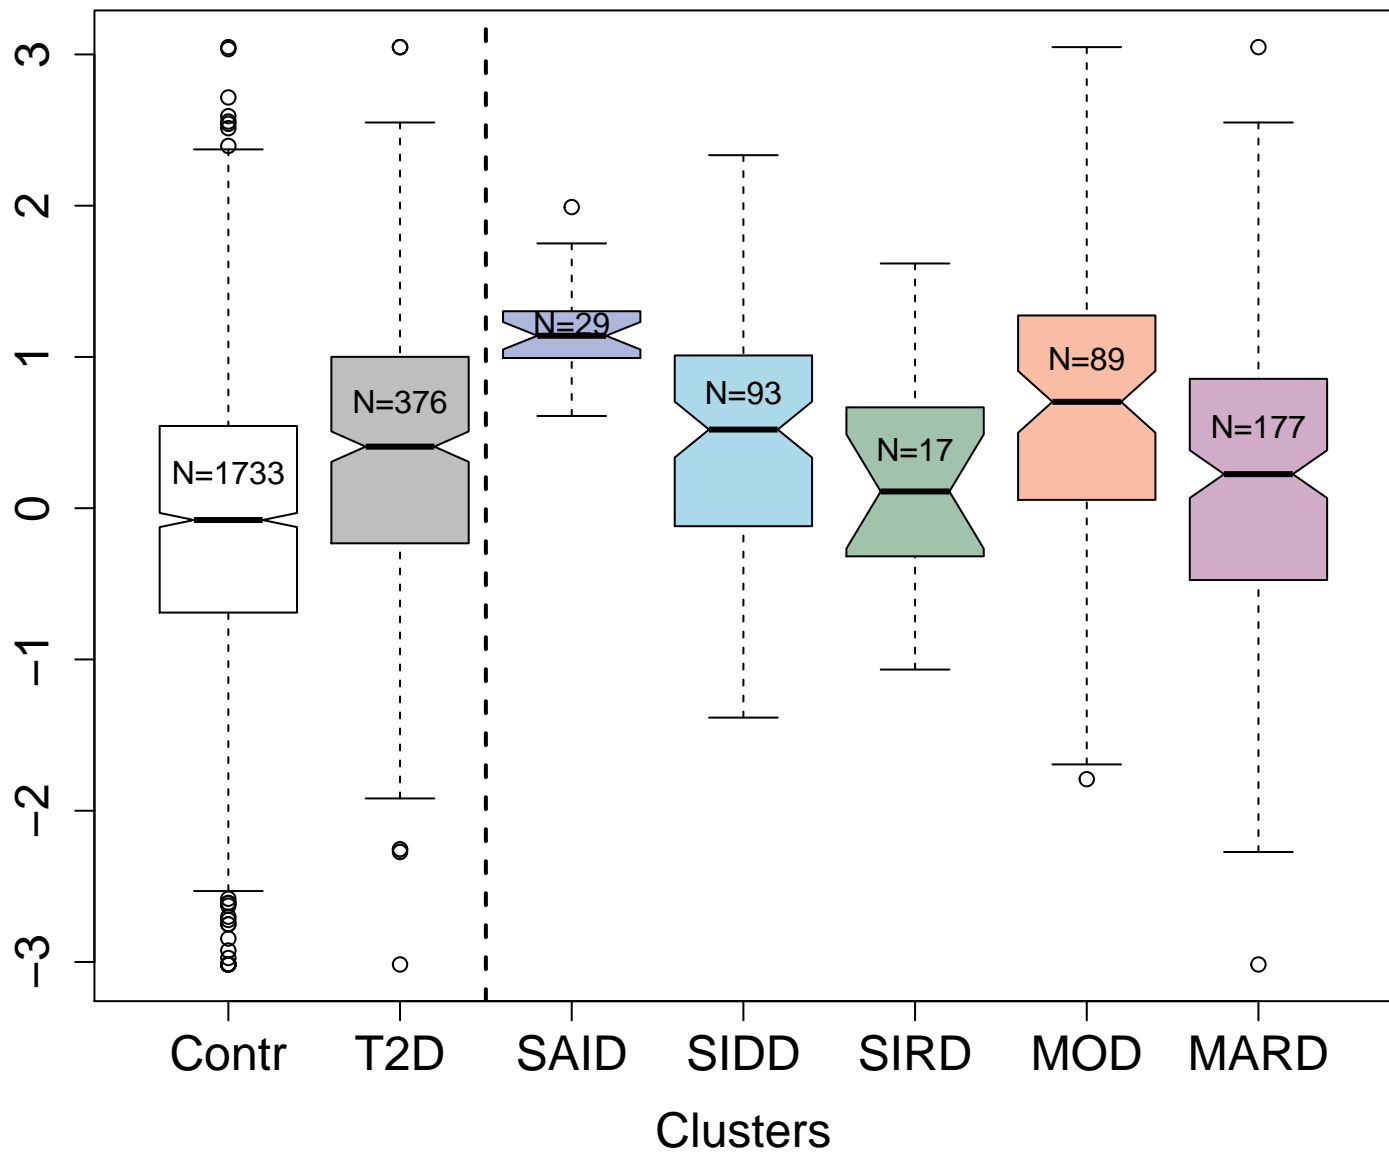

M34393 : 1-linolenylglycerol (18:3)

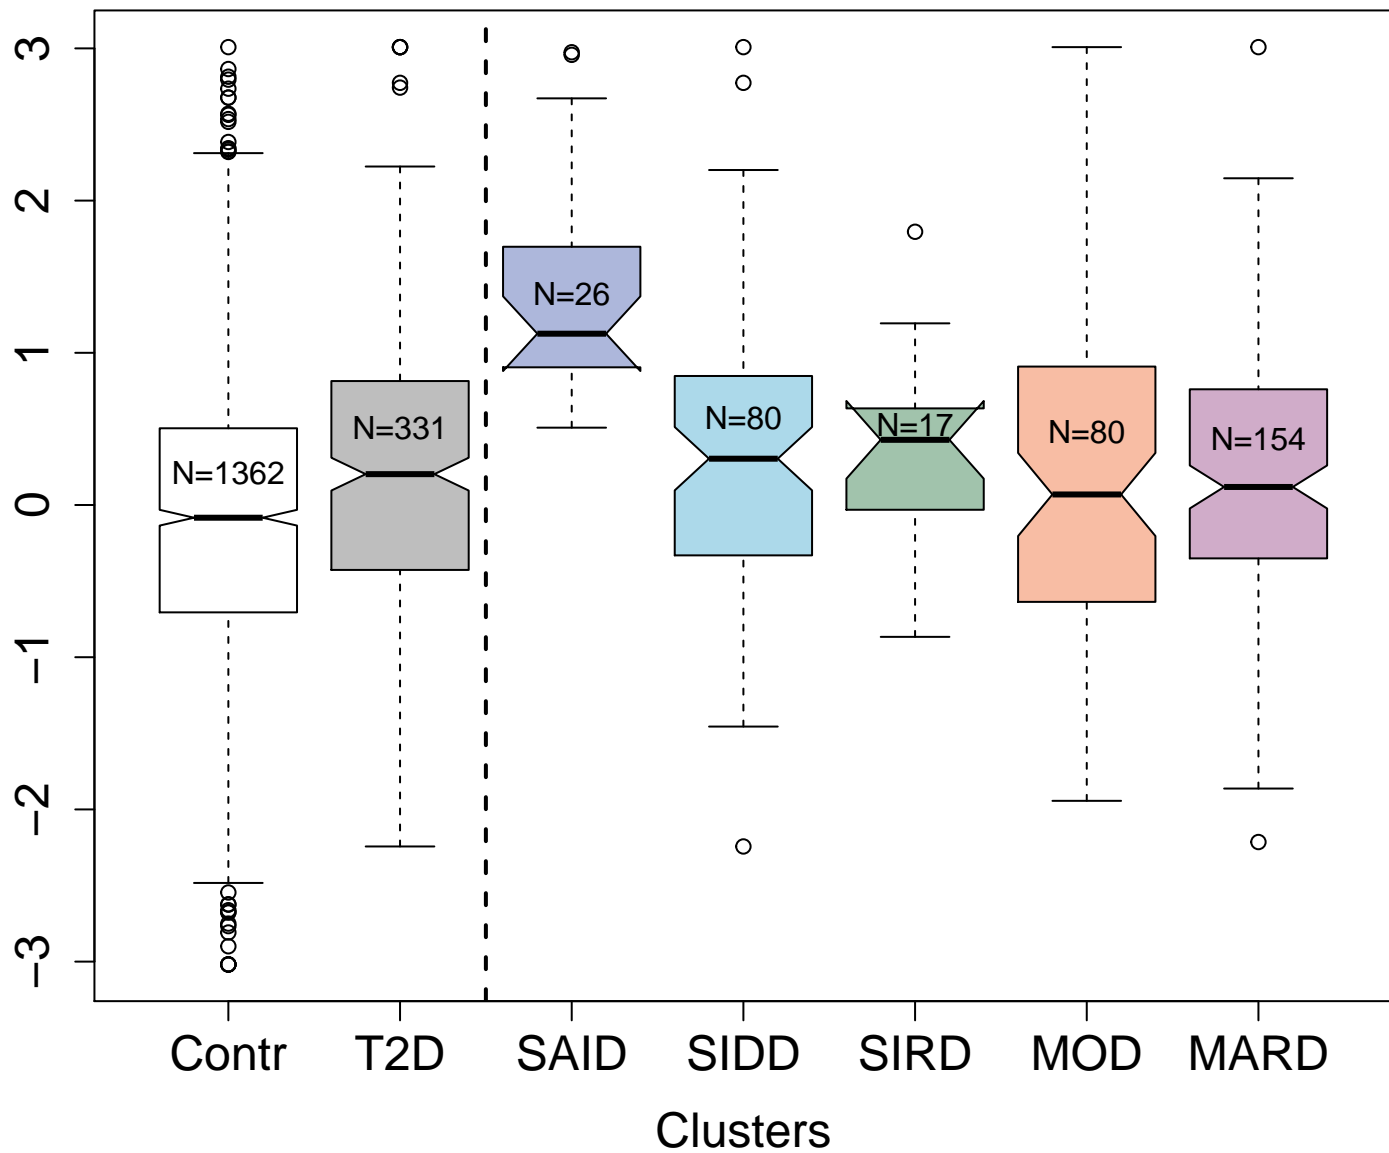

M48715 : eugenol sulfate

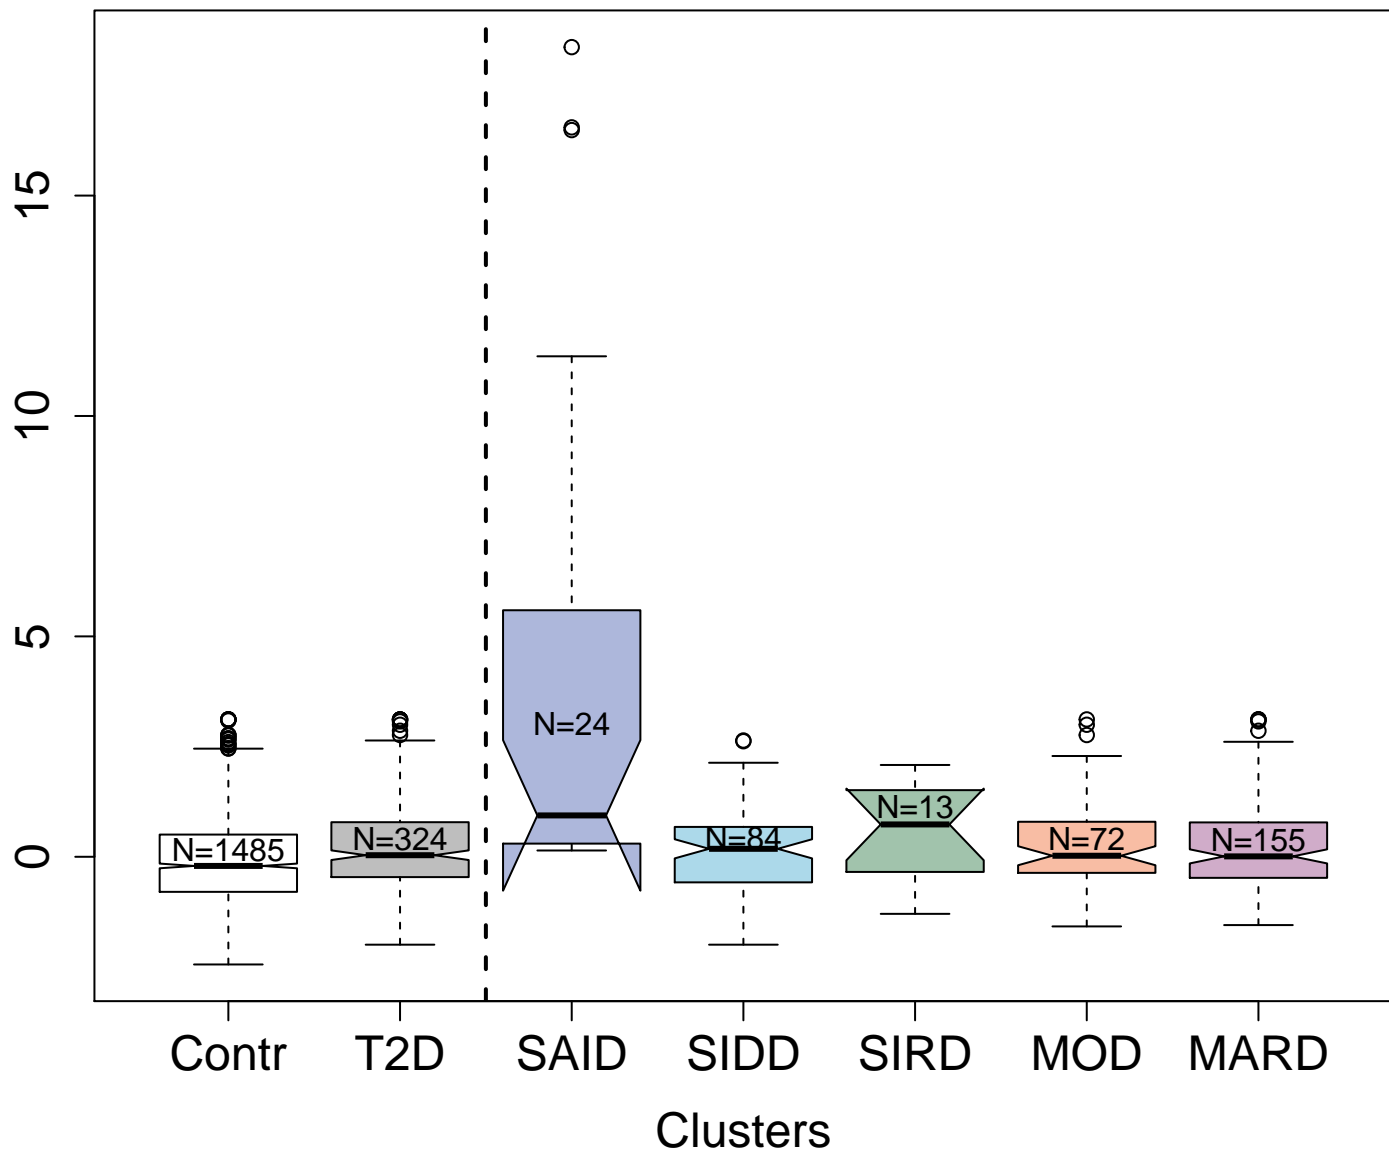

M63988 : 4-chlorobenzoic acid

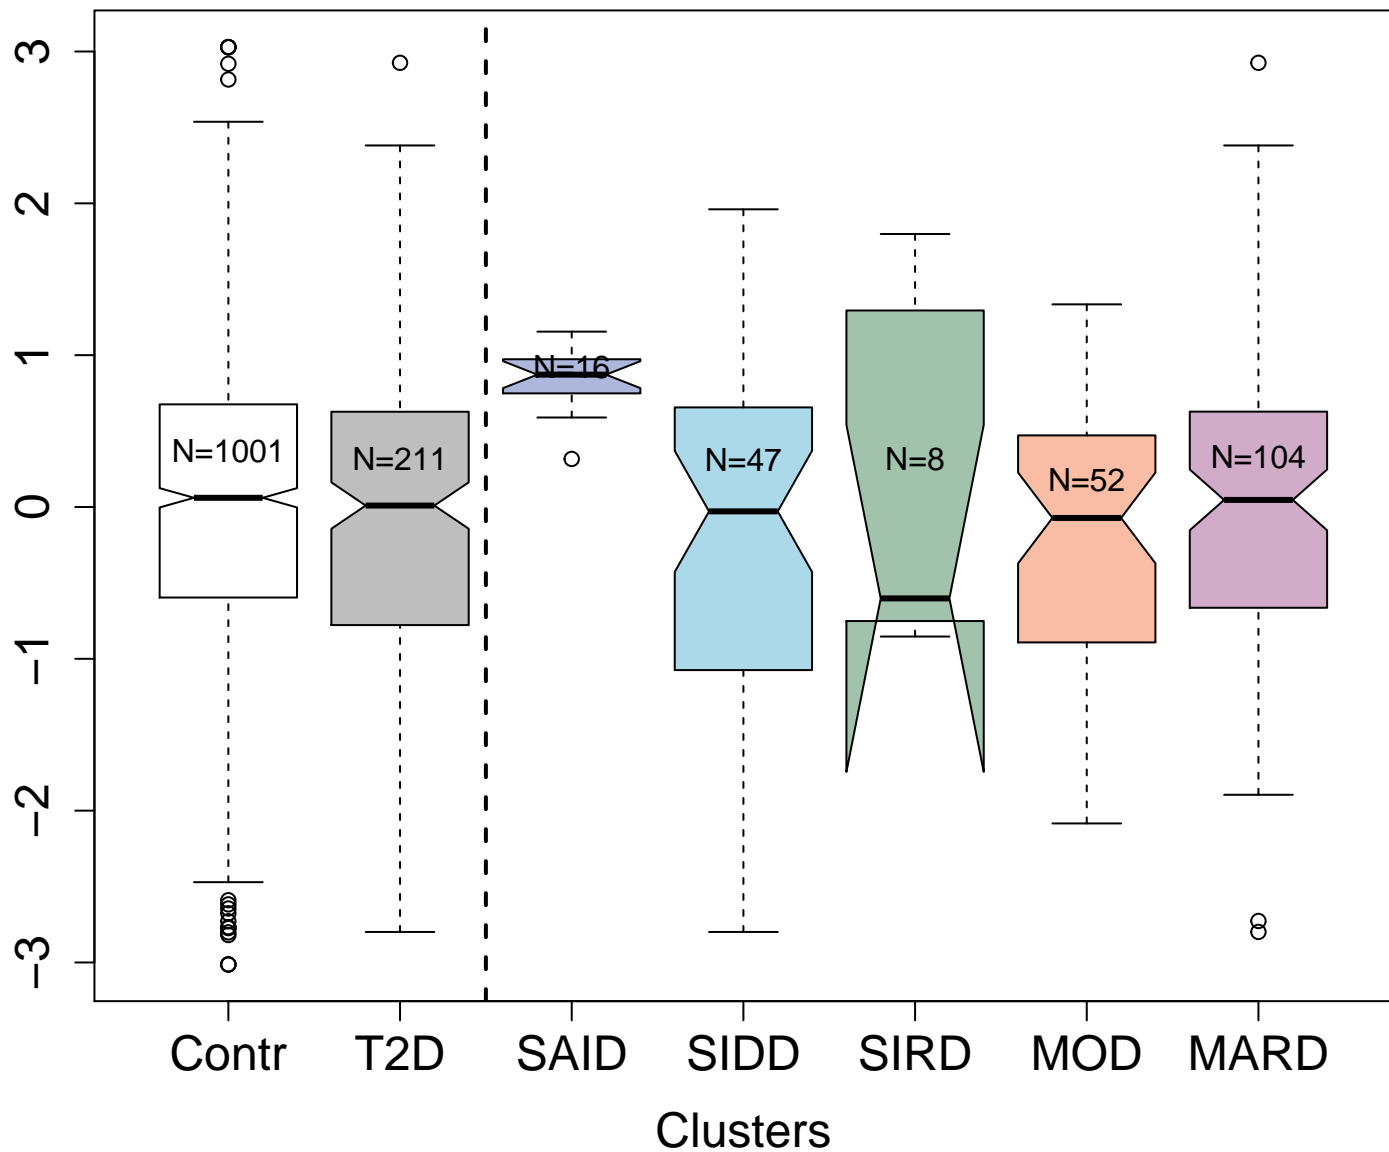

M37198 : 5alpha-pregnan-3beta,20alpha-diol disulfate

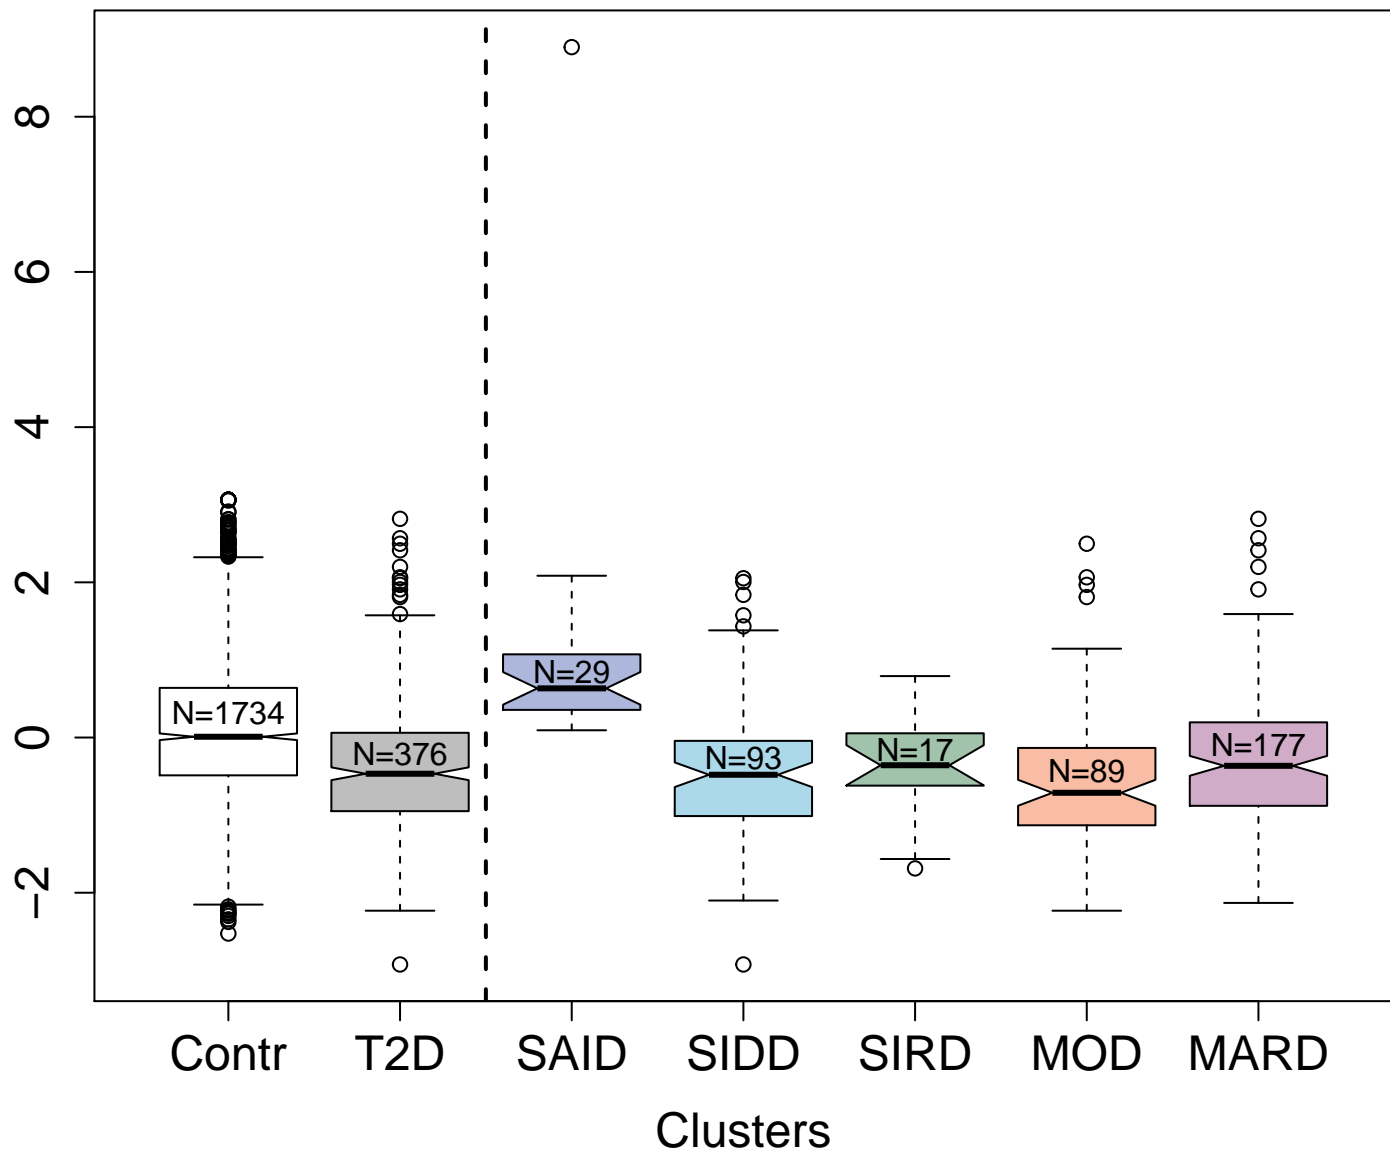

M15720 : N-acetylglutamate

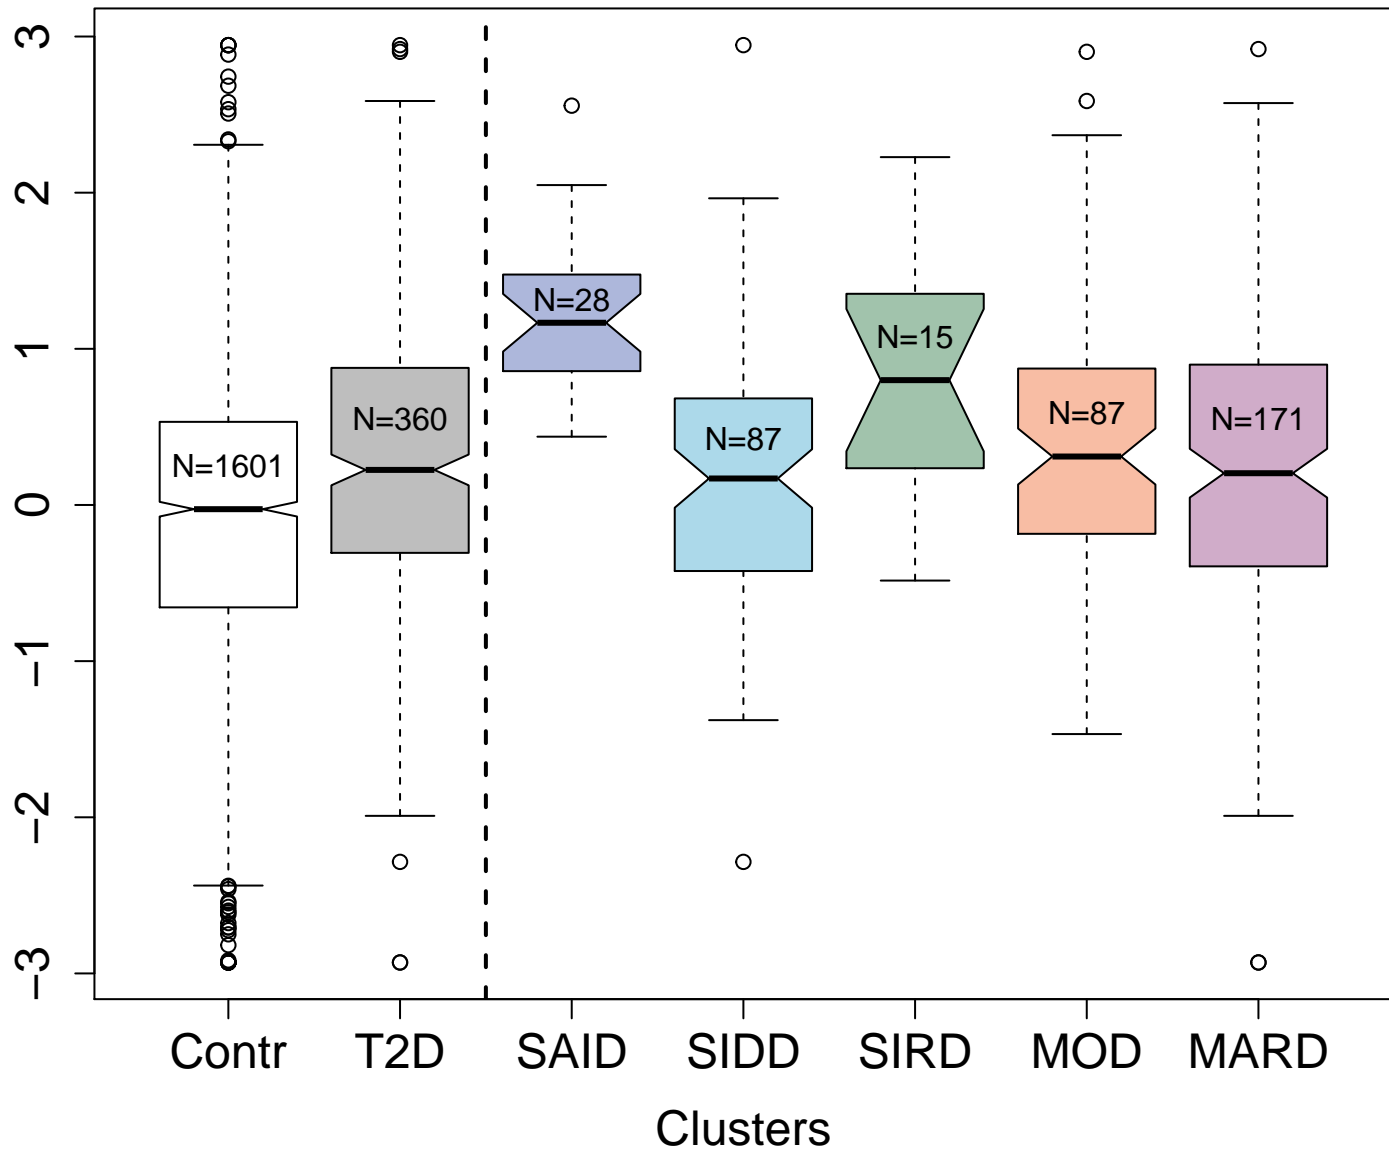

M52610 : 1-palmitoyl-2-docosahexaenoyl-GPC (16:0/22:6)

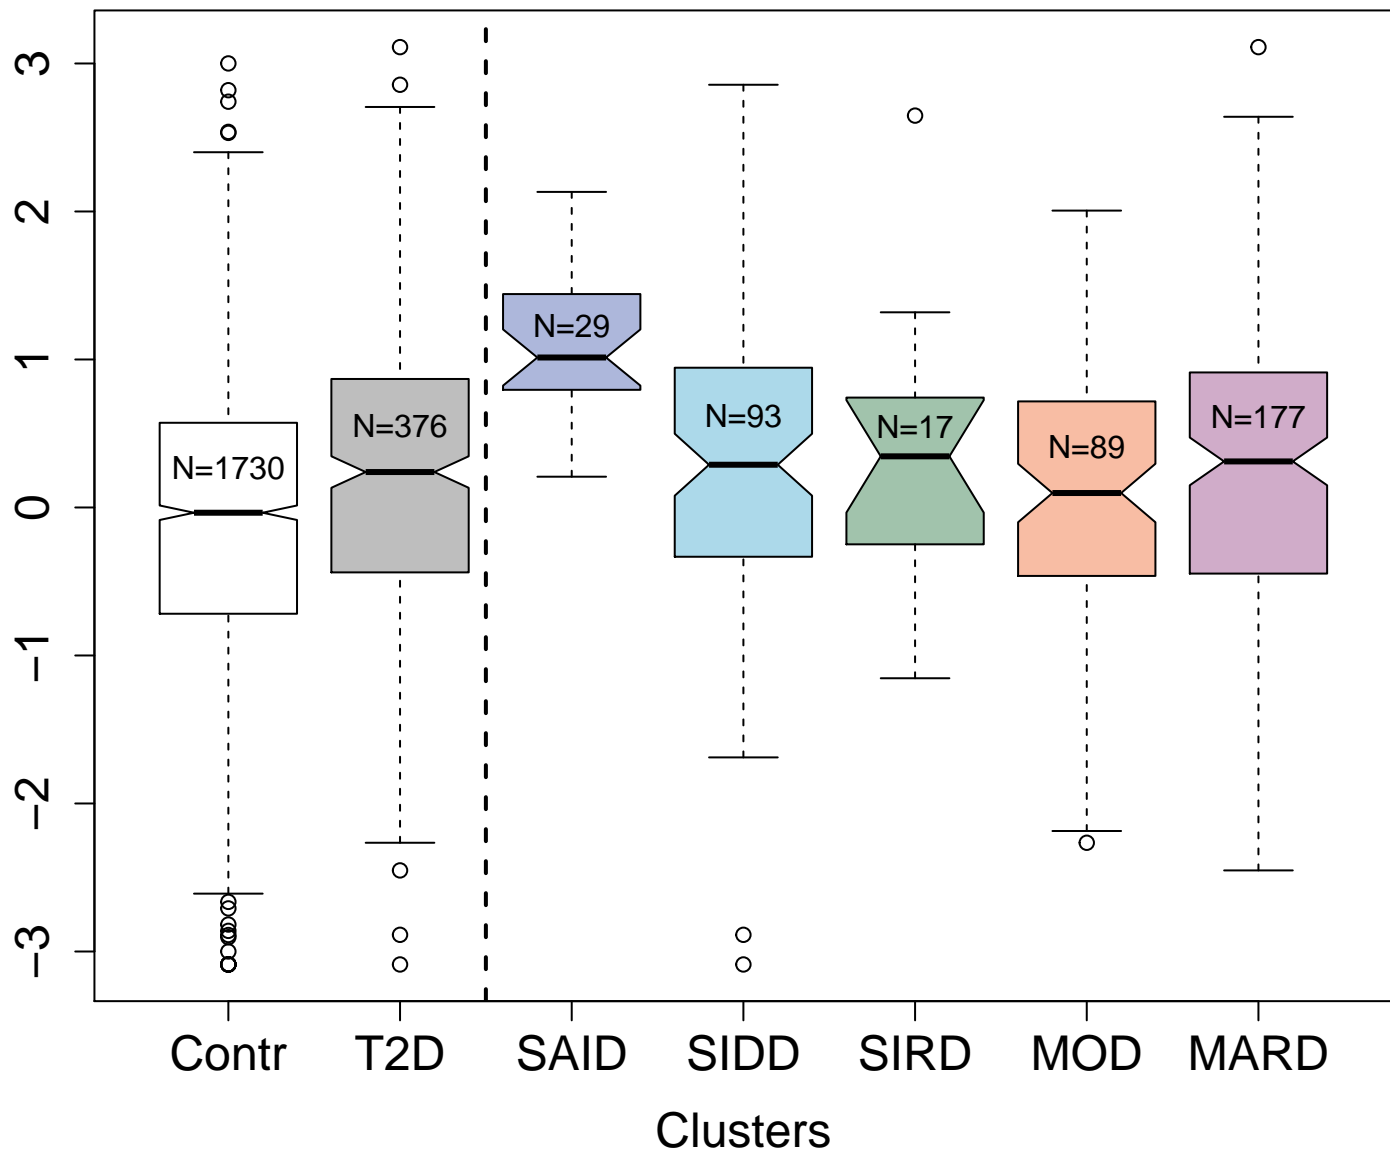



M52025 : X - 23997

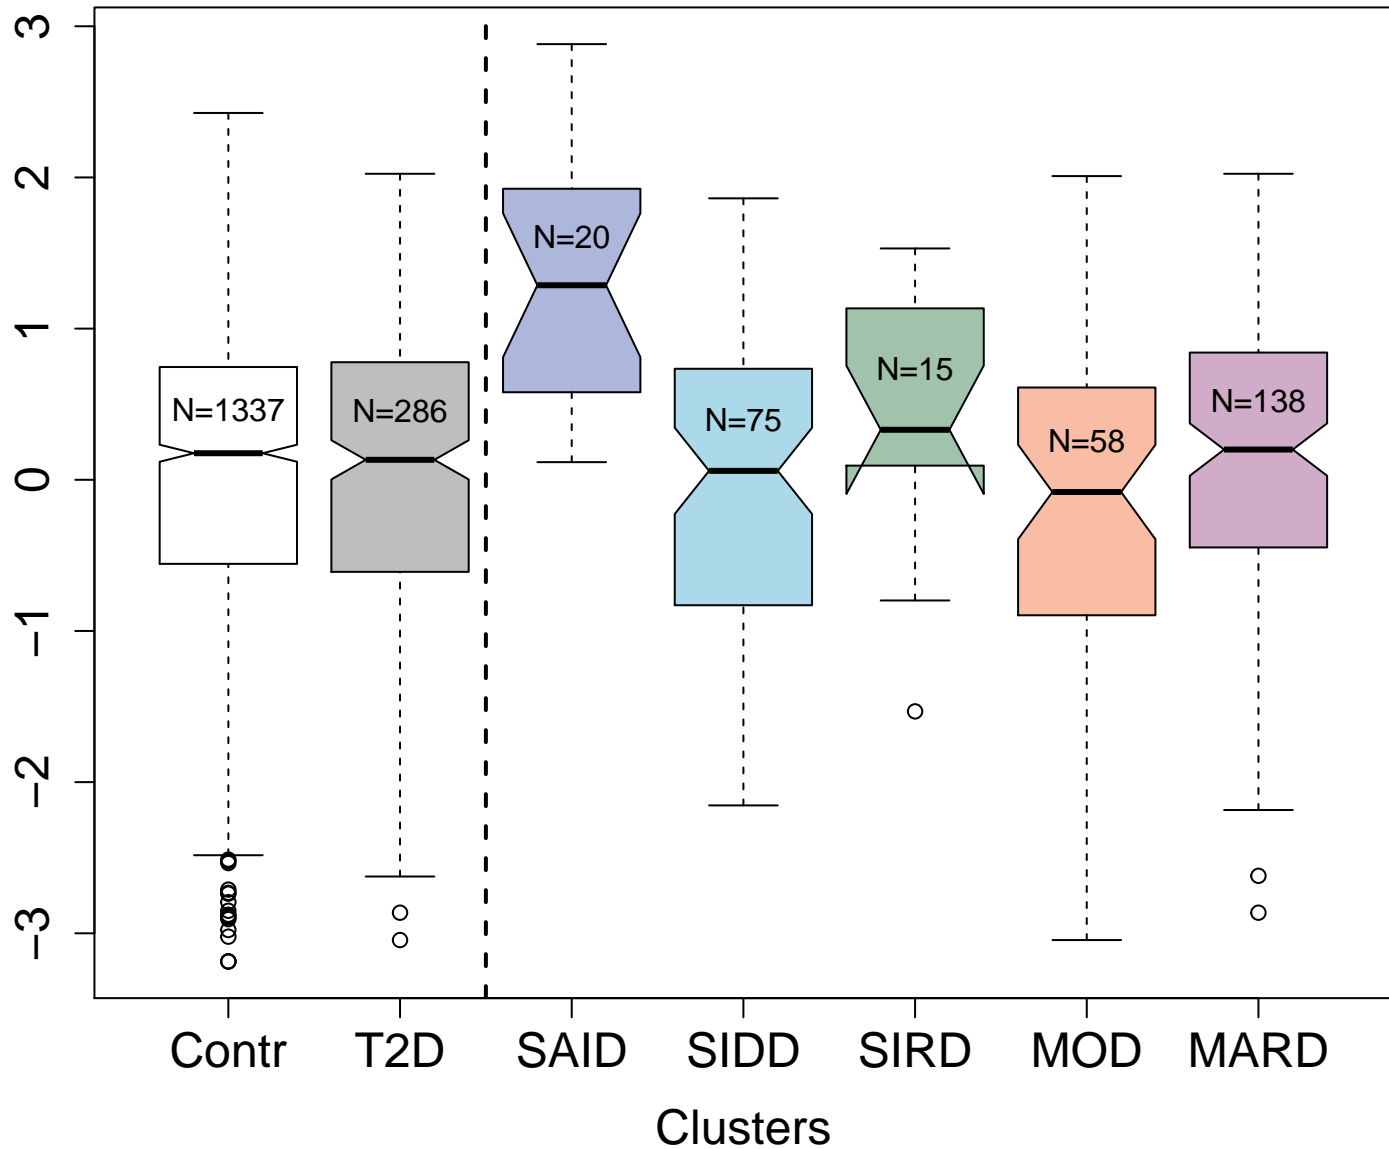

M43807 : bilirubin (Z,Z)

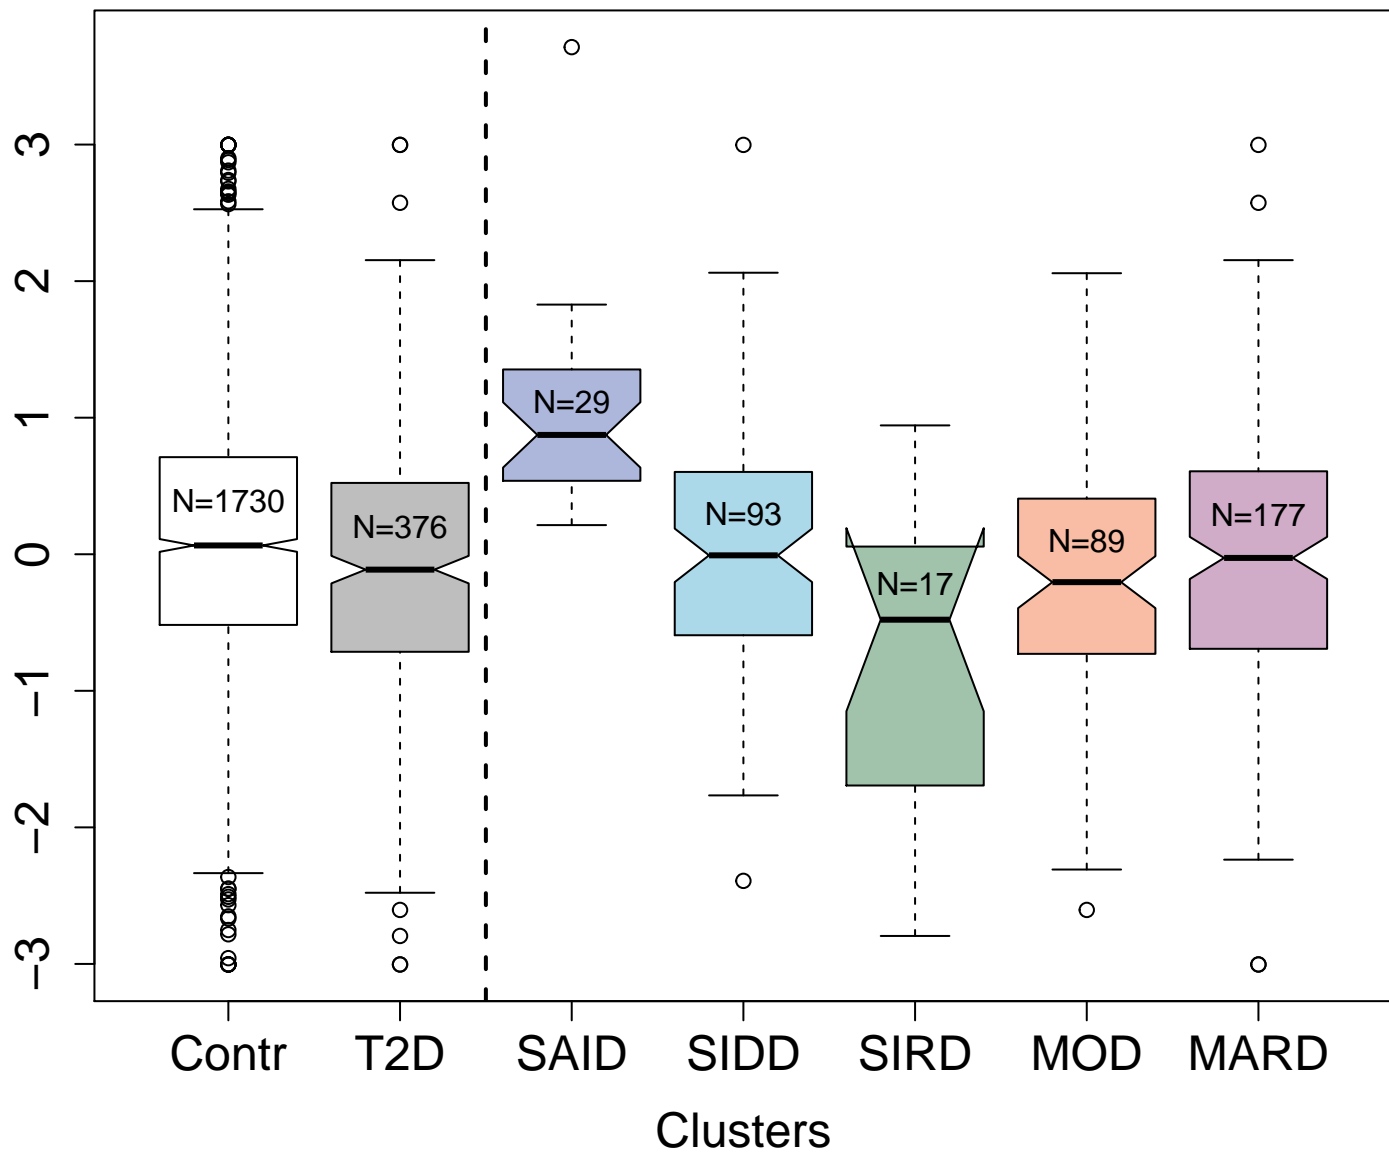

M31938 : 5-hydroxyhexanoate

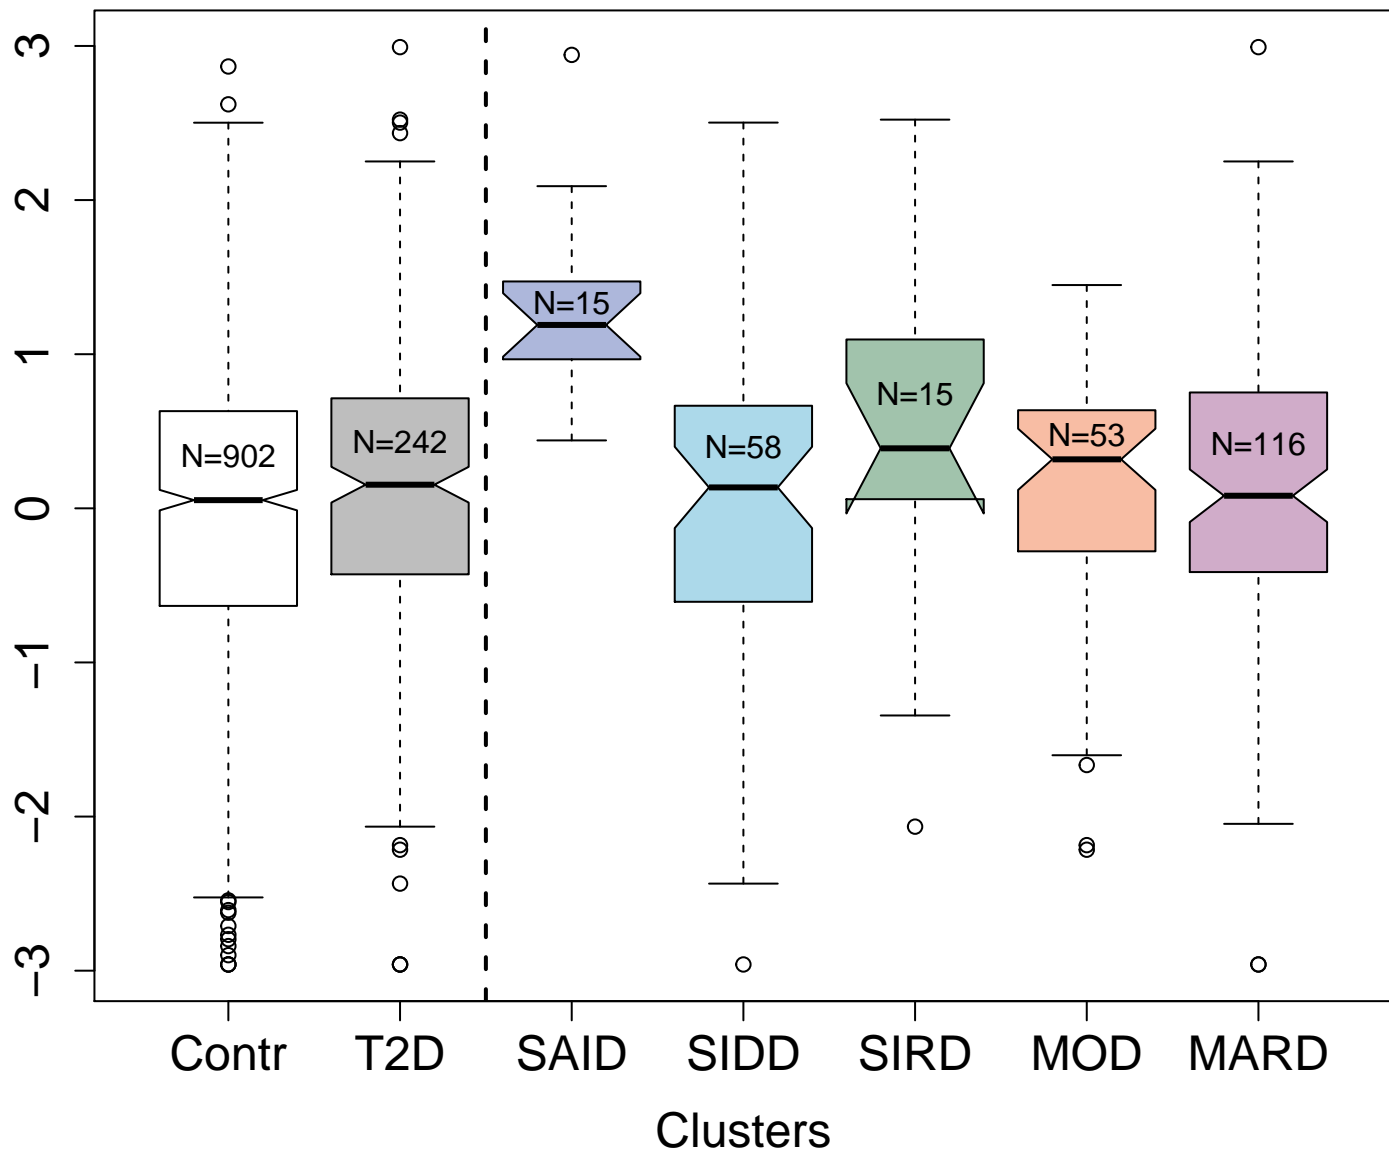

M62562 : 1-carboxyethylvaline

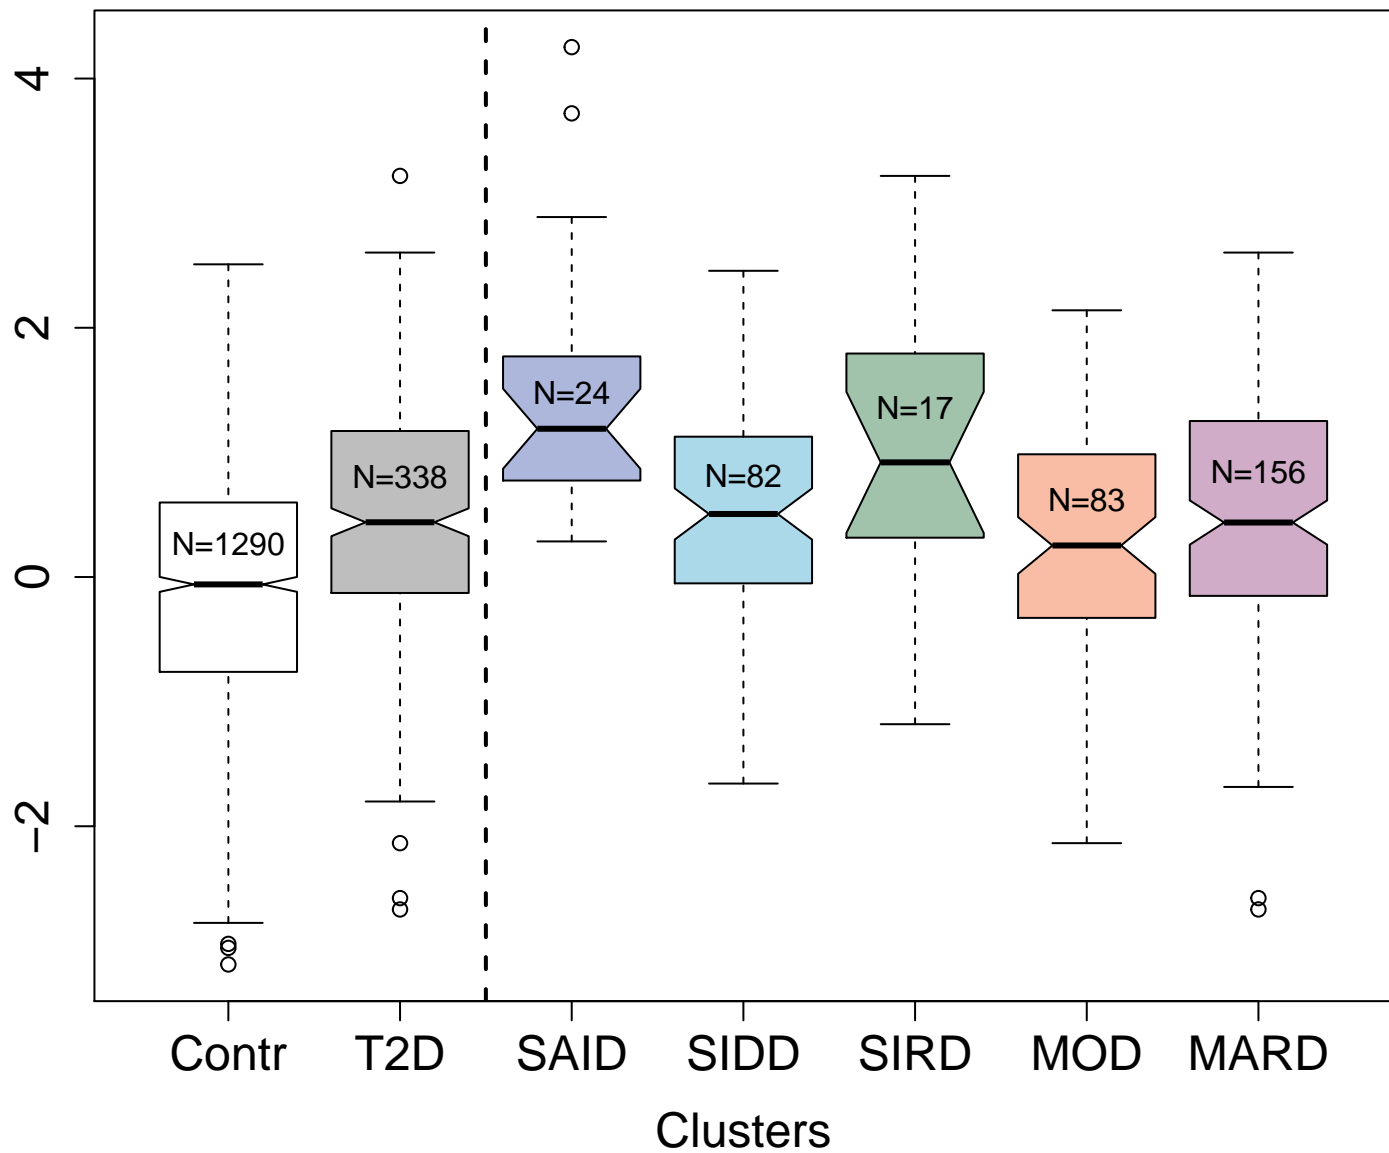

M48441 : 4-hydroxychlorothalonil

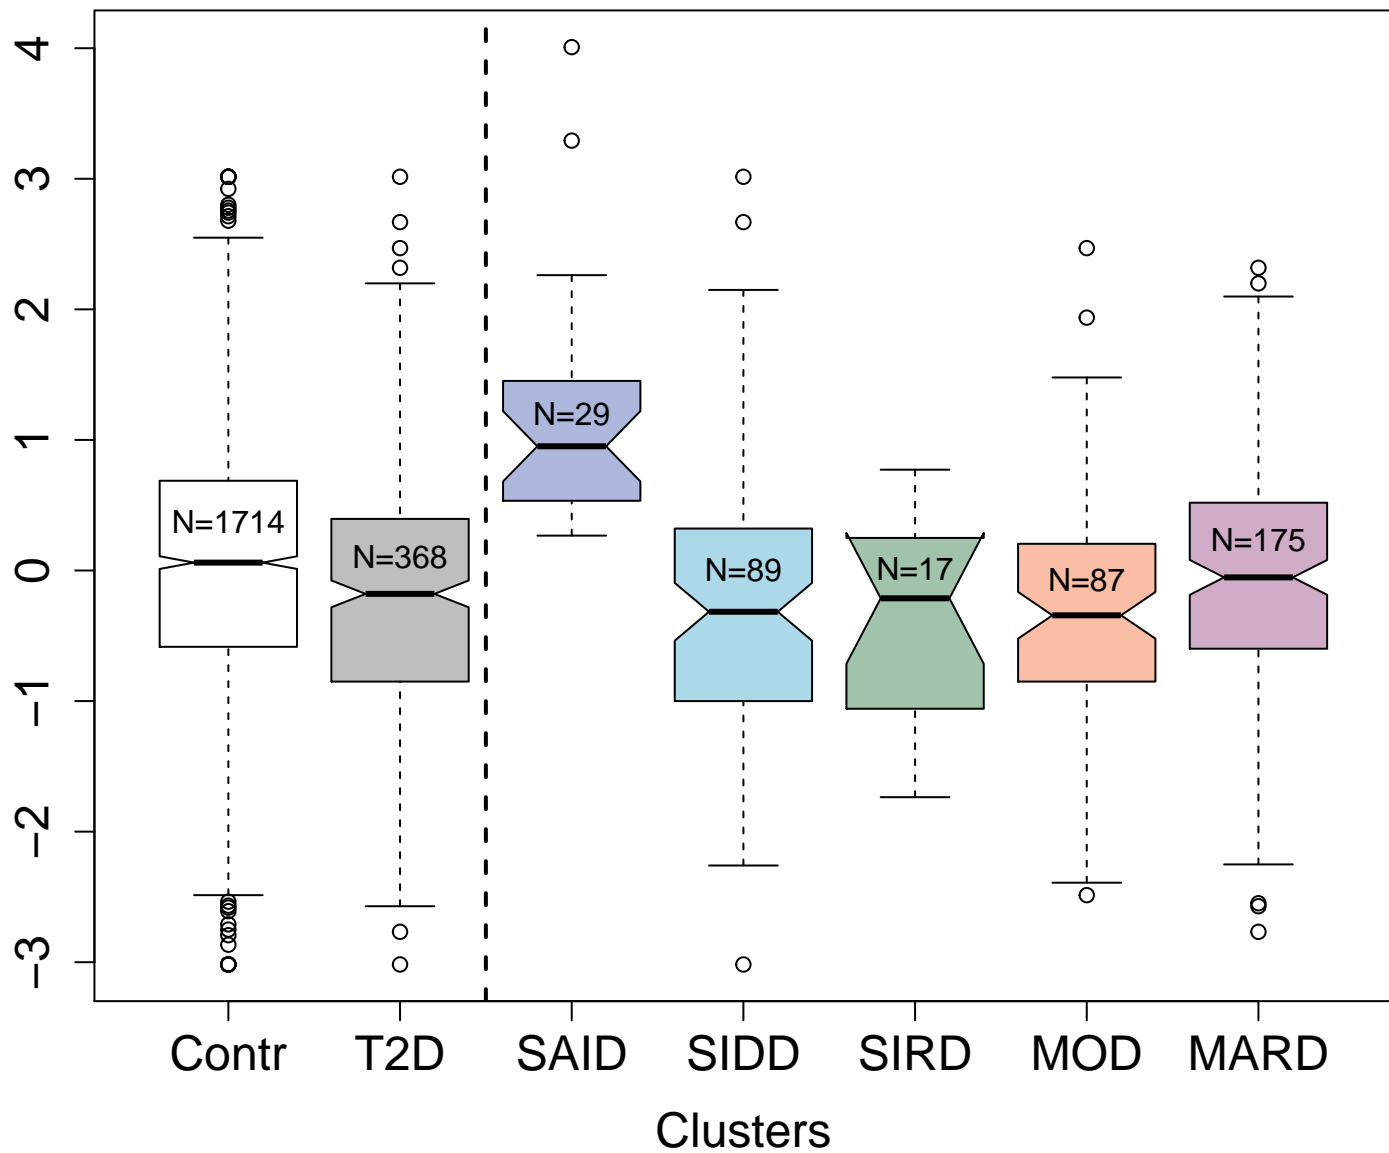

M64050 : 2-methoxyhydroquinone sulfate (2)

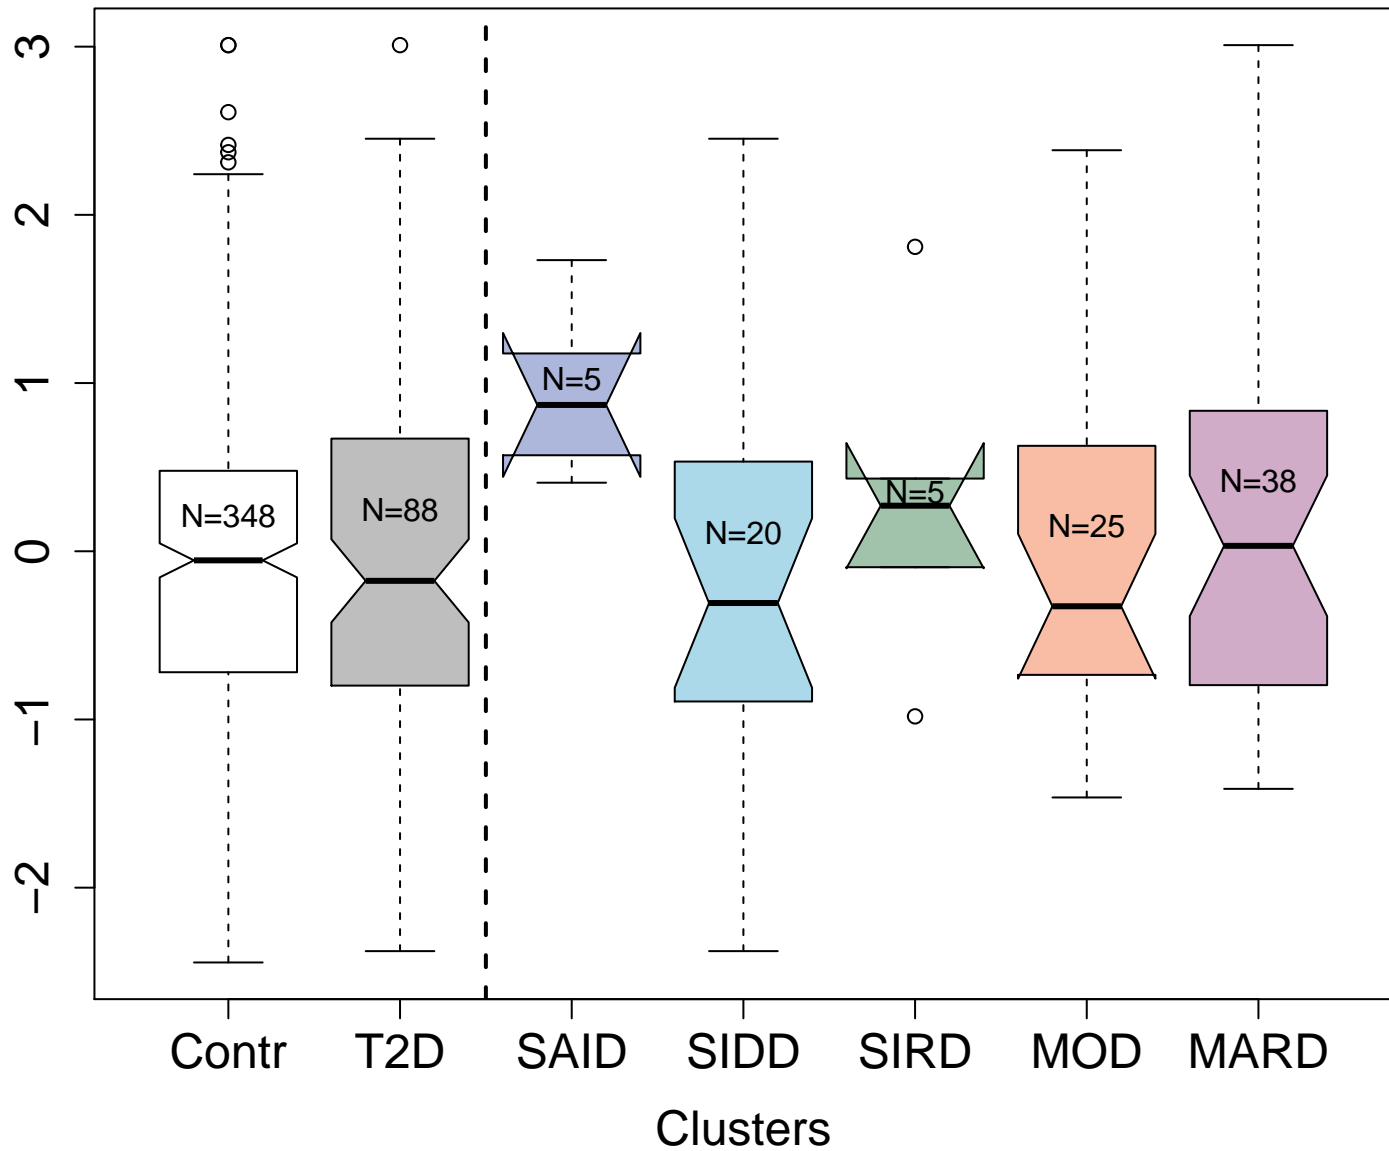

M15765 : ethylmalonate

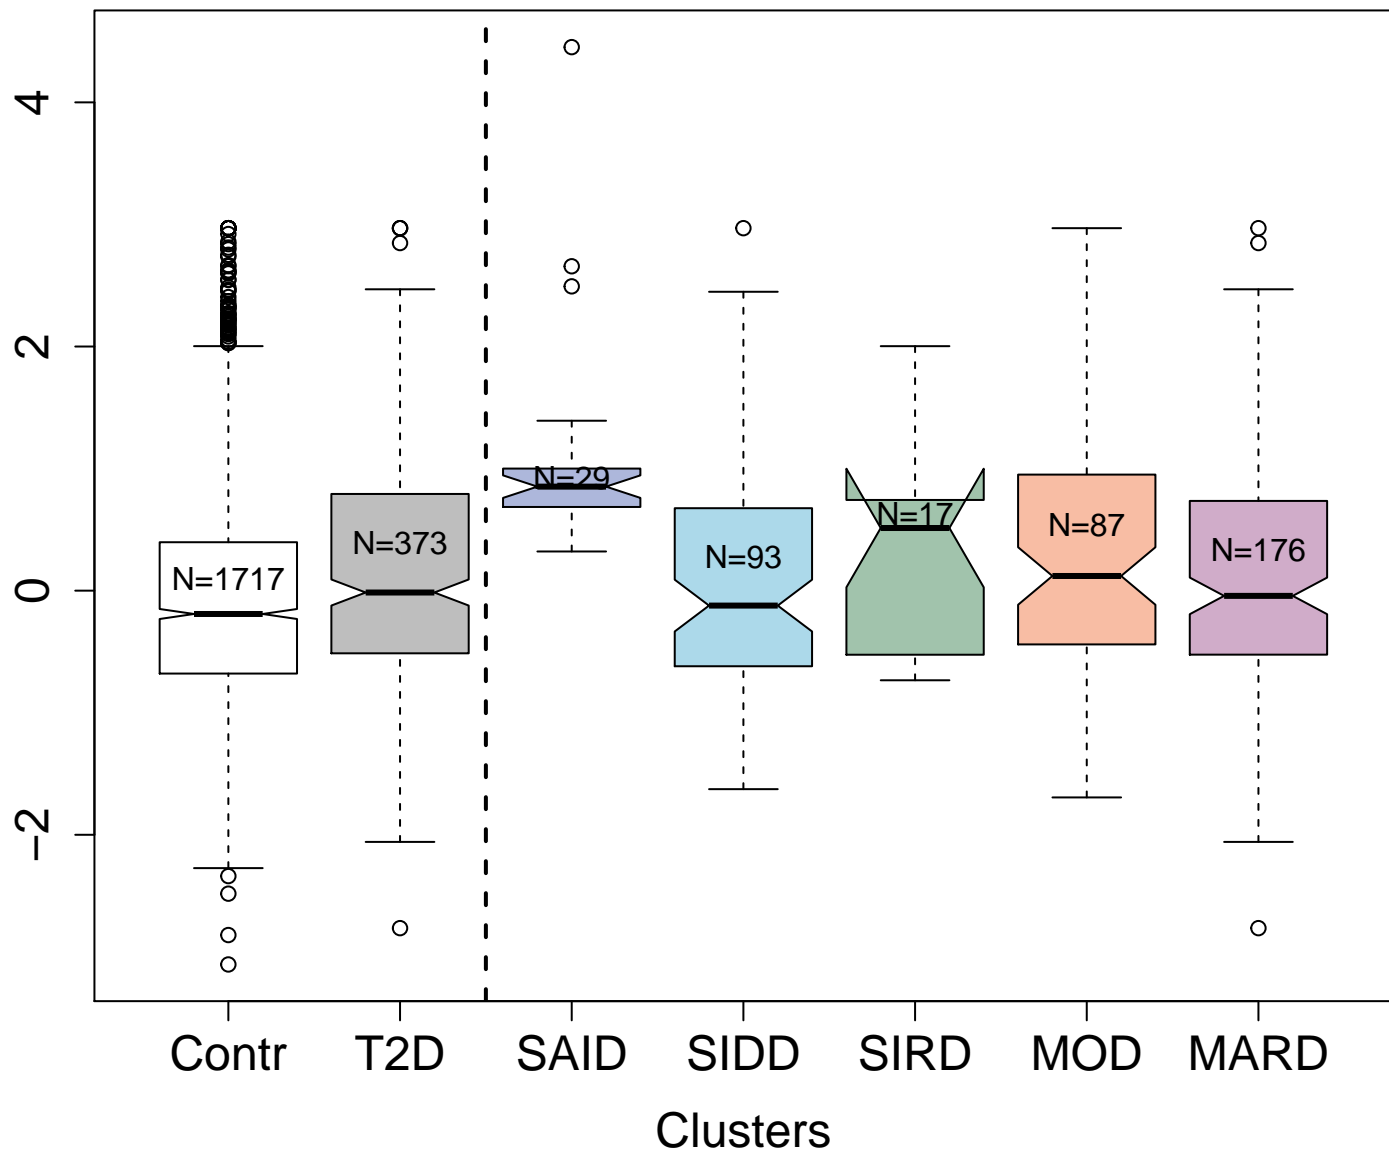

M43374 : indolin-2-one

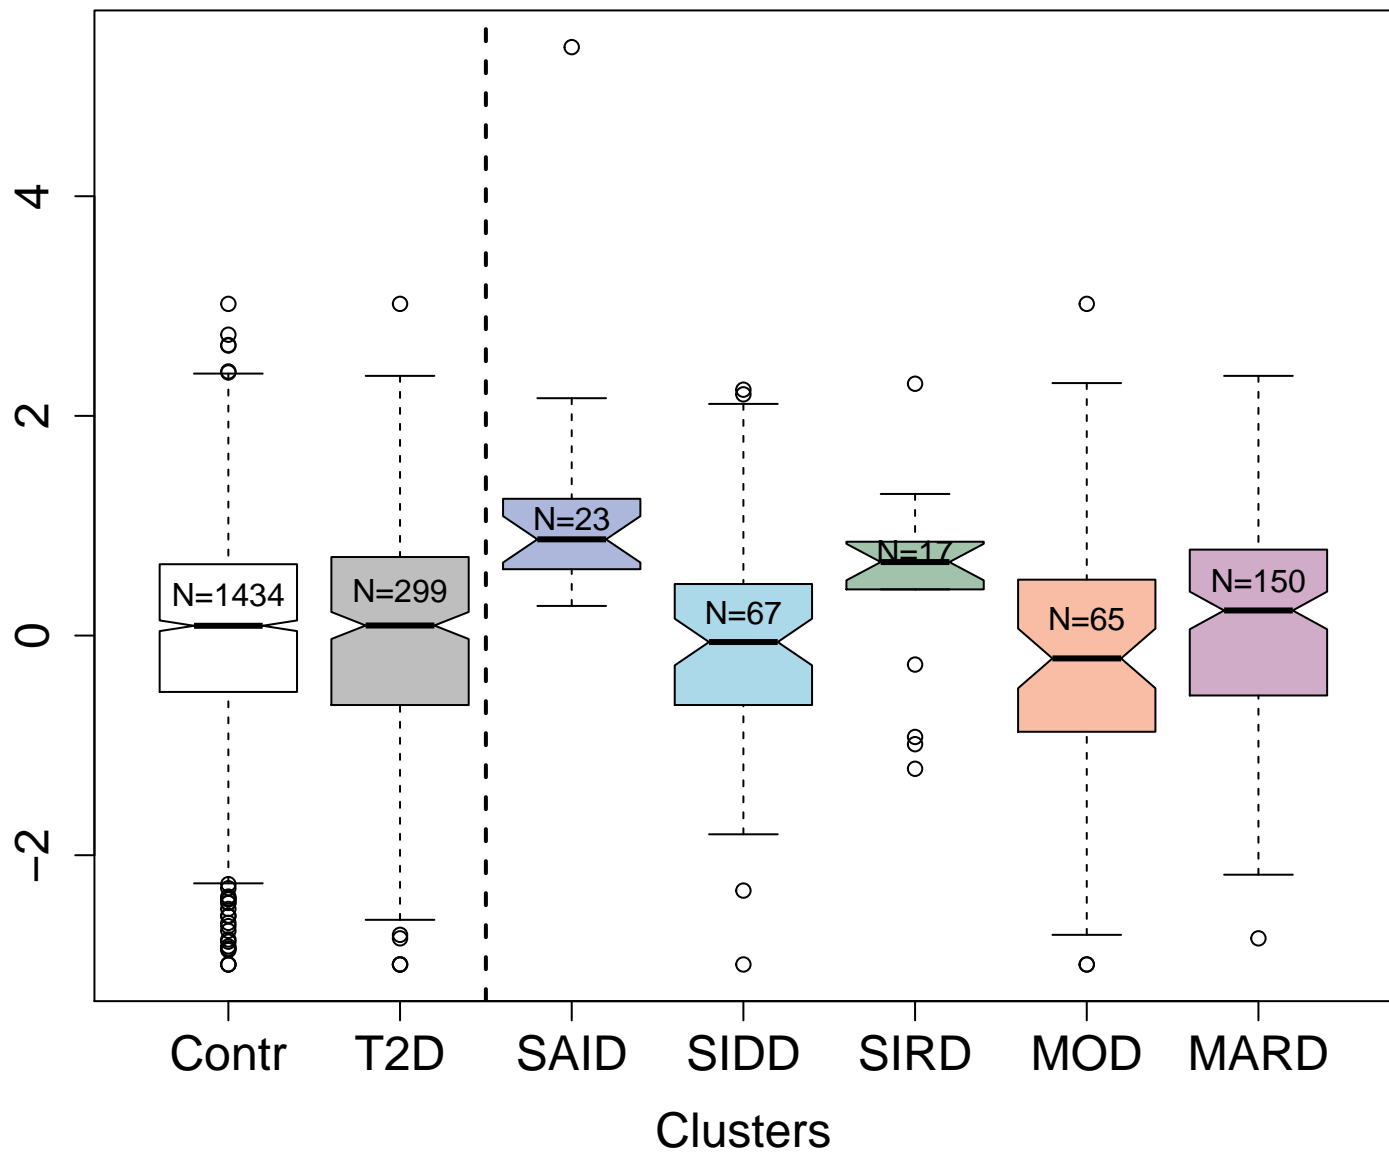



M18474 : estrone 3-sulfate

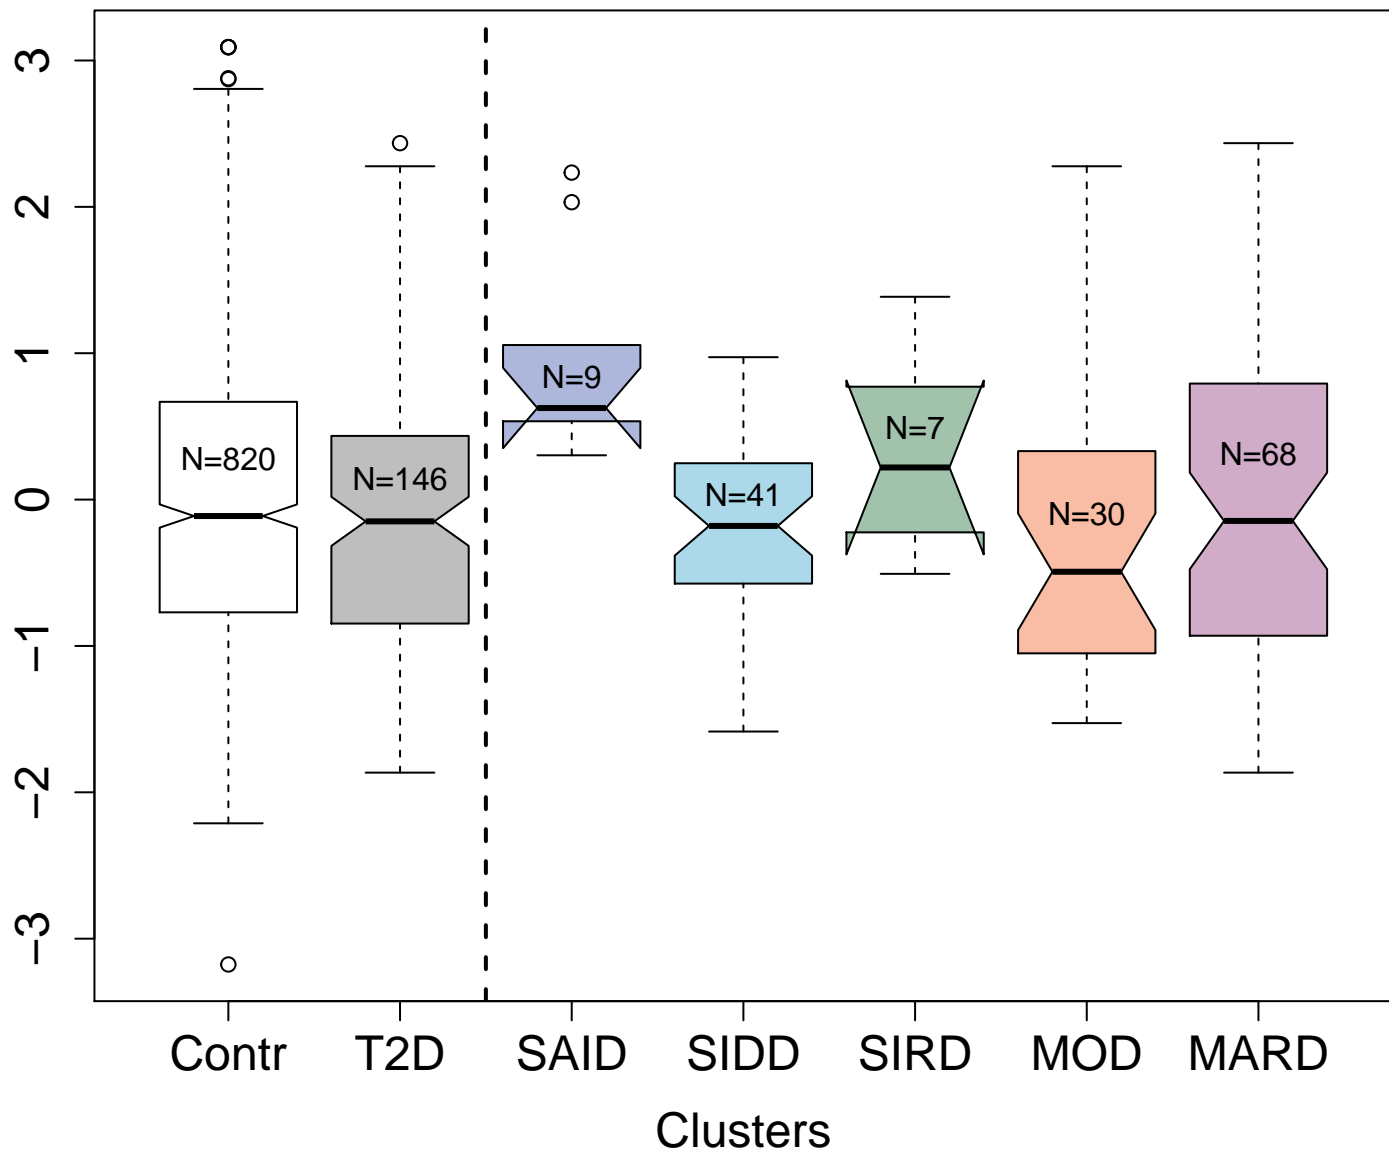

M63191 : branched chain 14:0 dicarboxylic acid\*\*

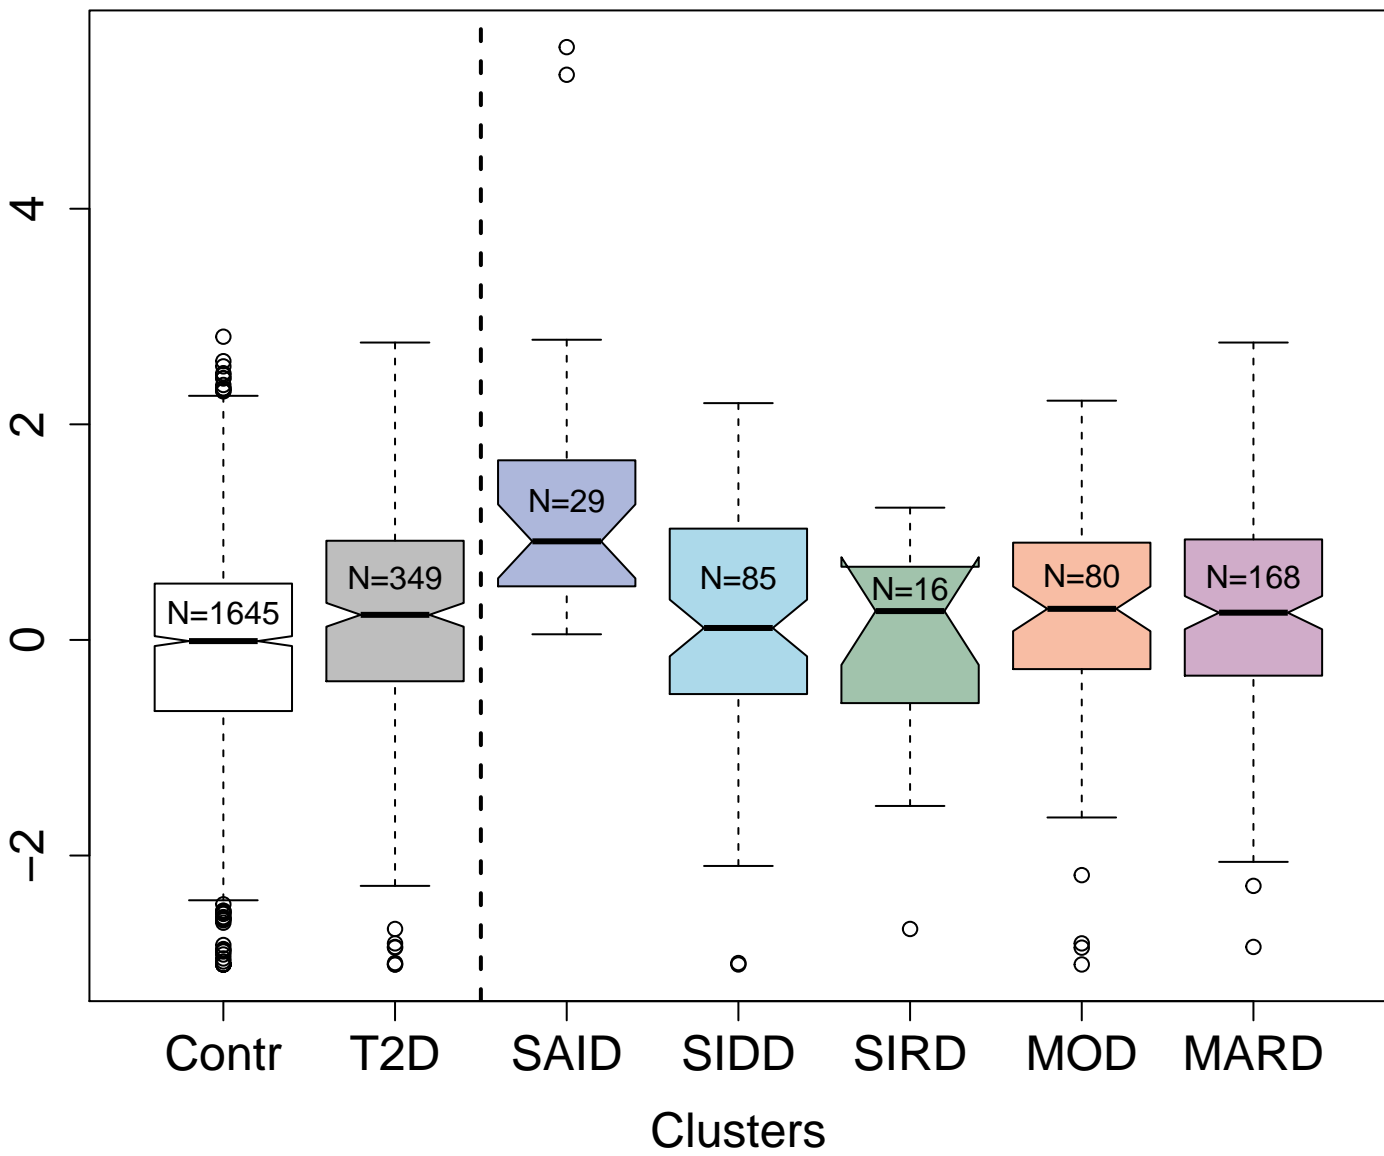

M46646 : X - 13835

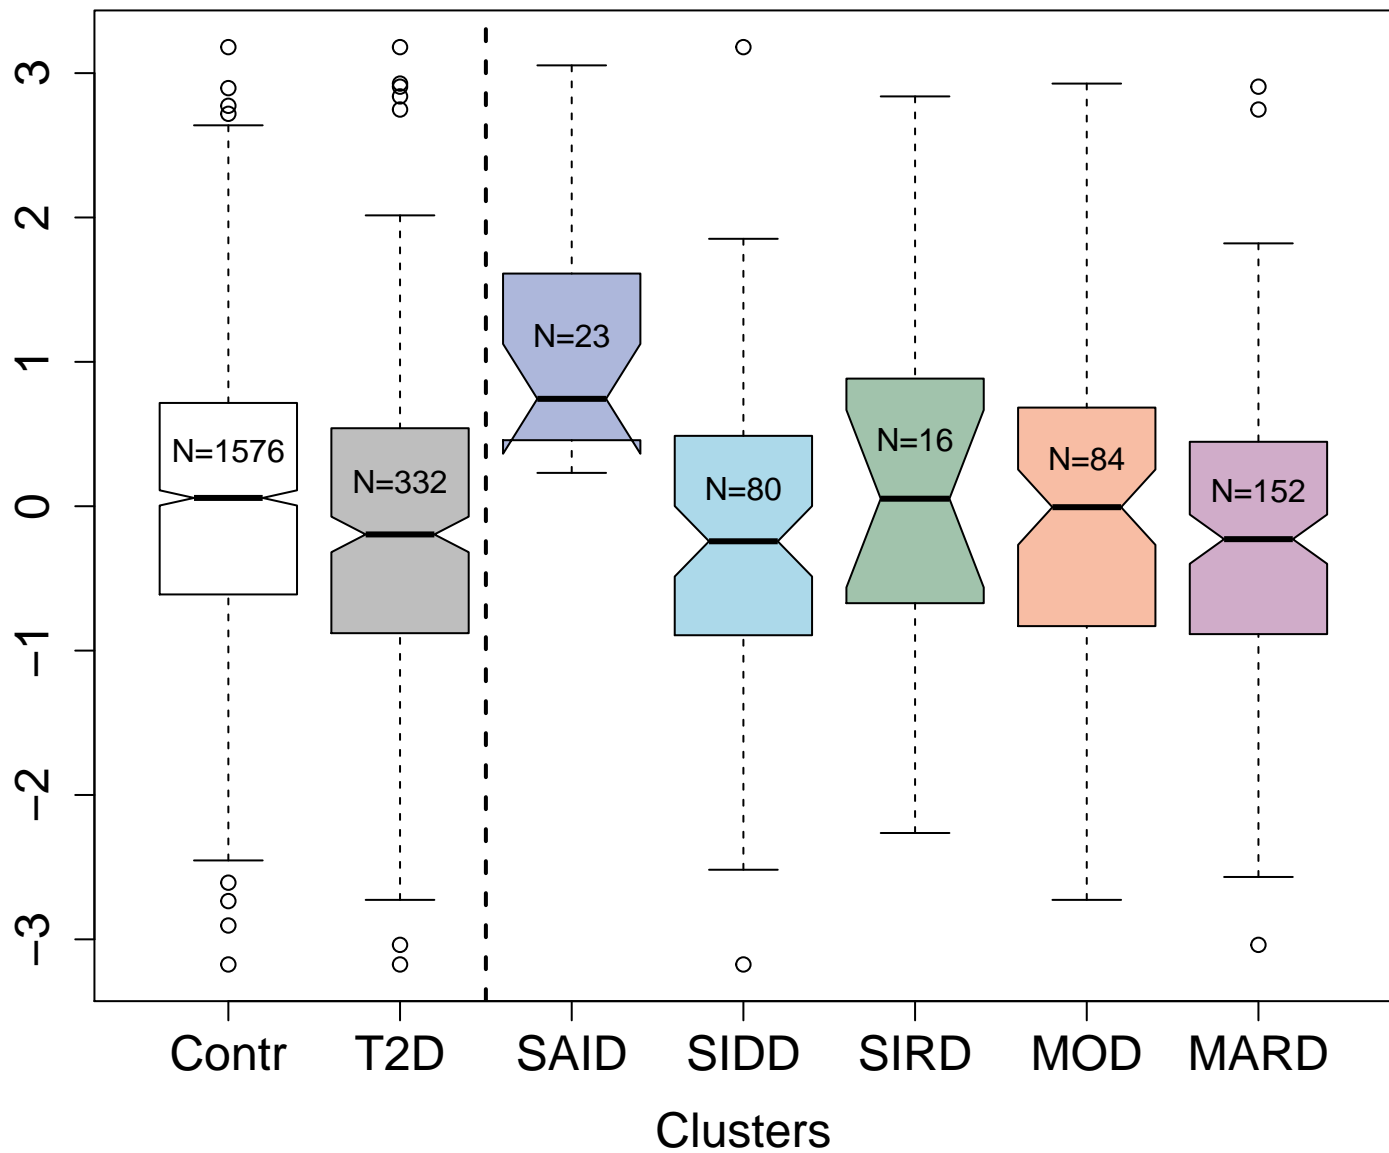

M47988 : X - 16087

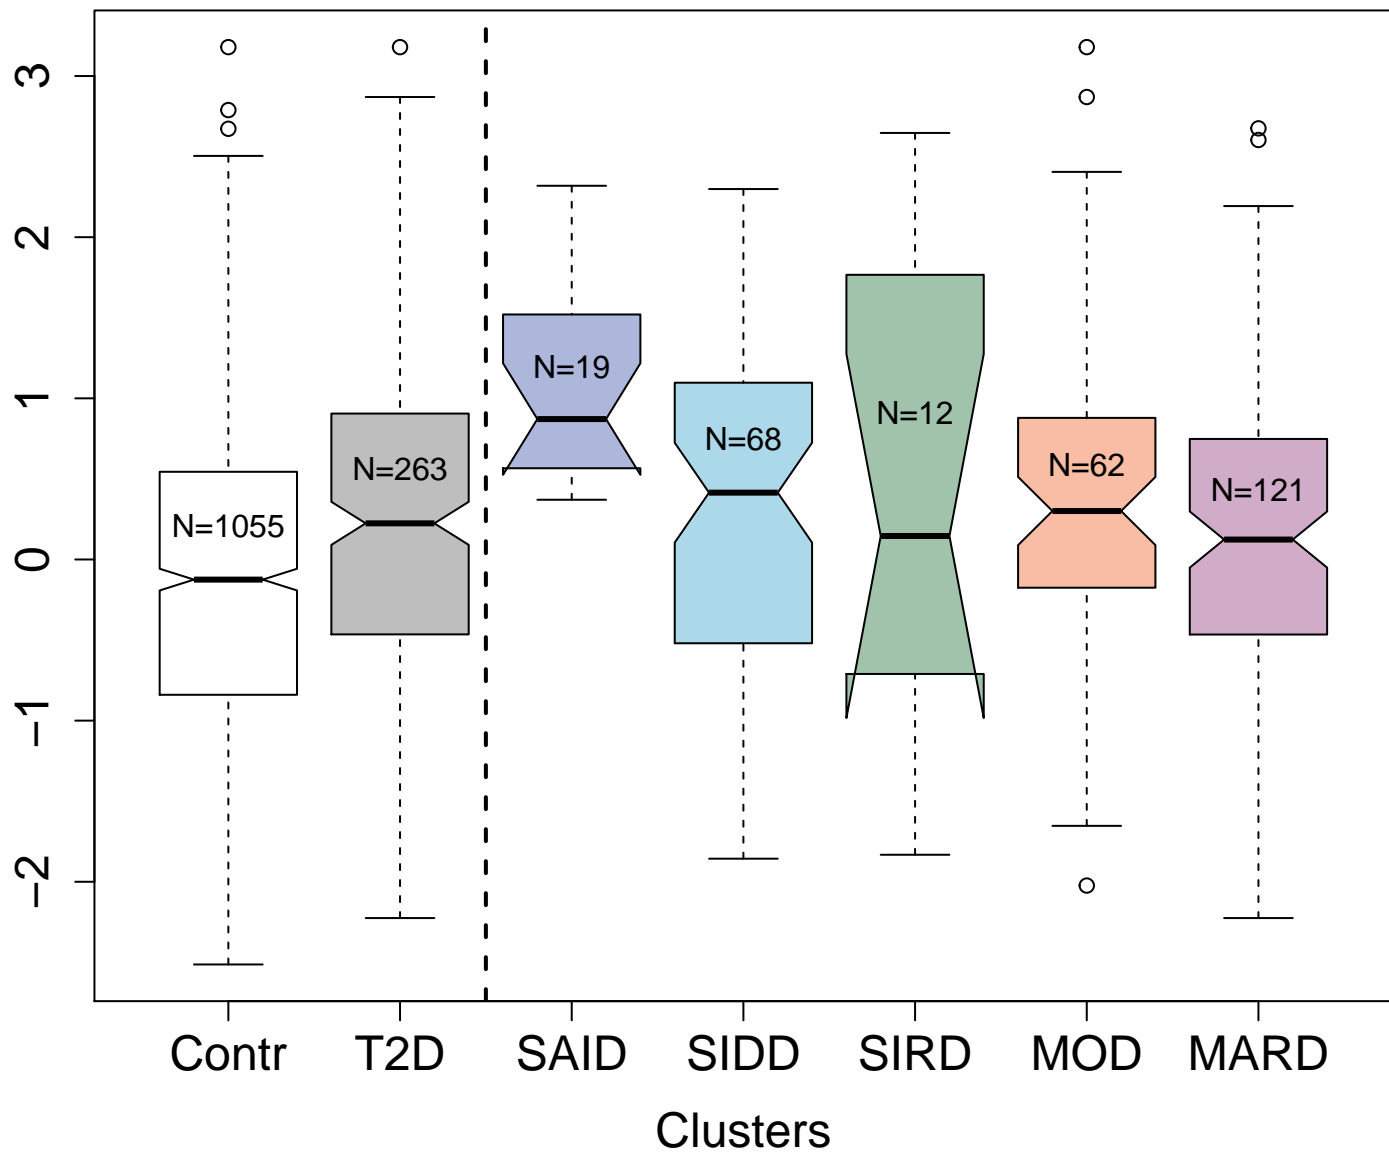

M46466 : X - 11843

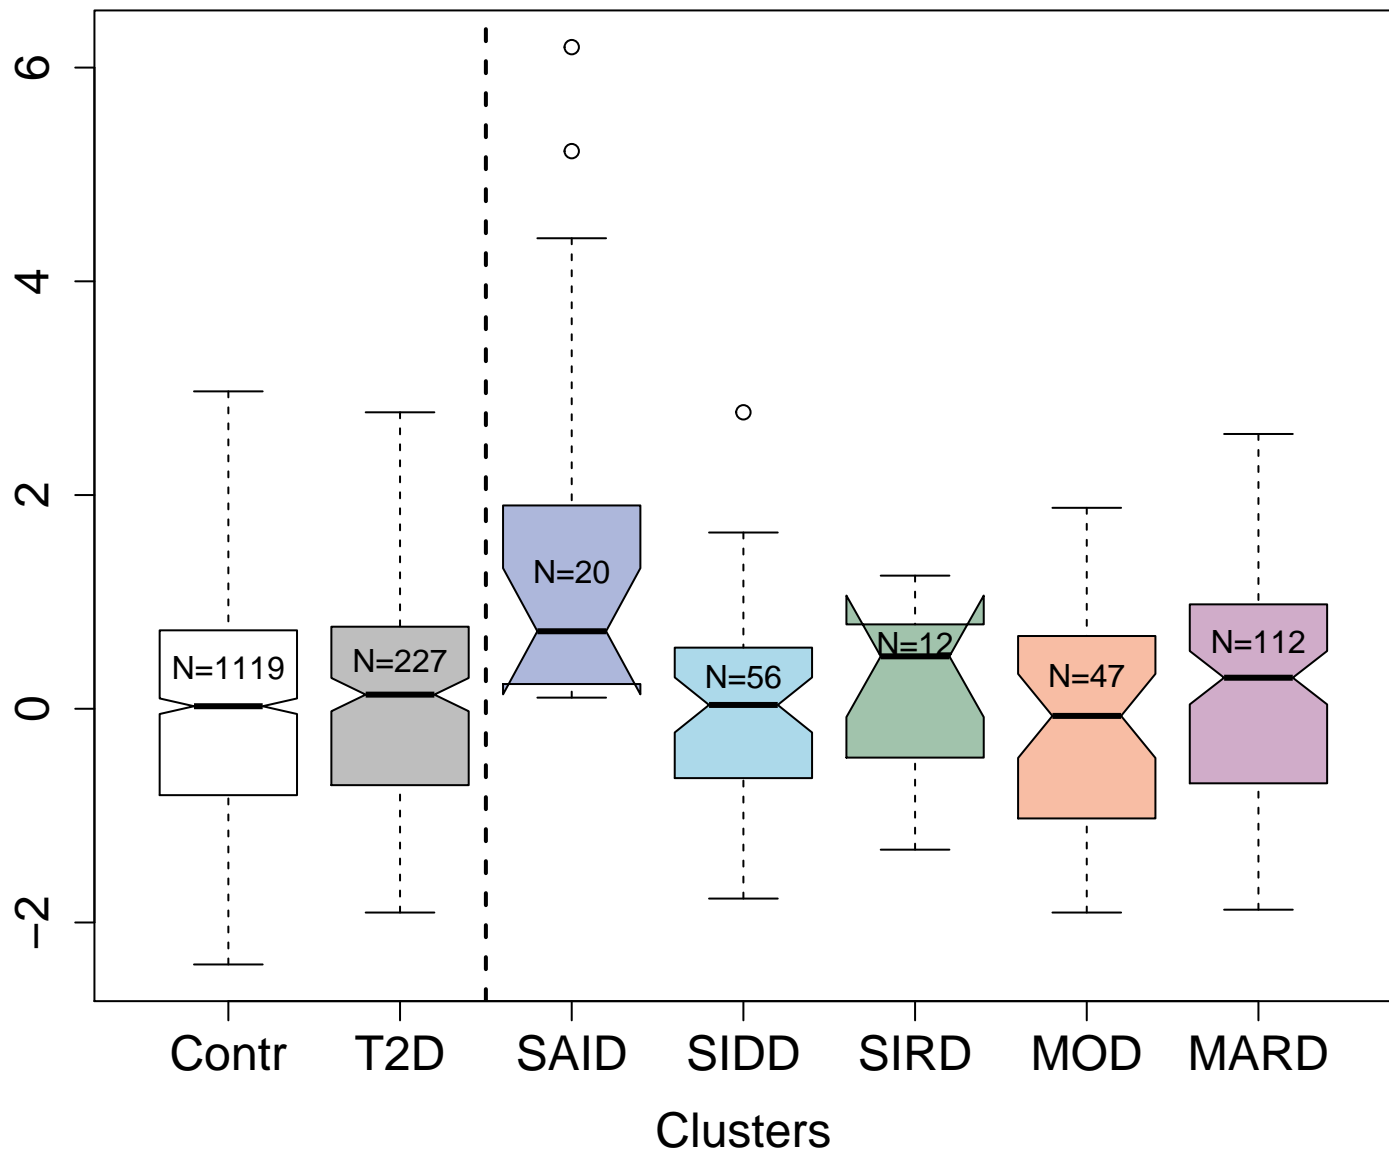

M1587 : N-acetylleucine

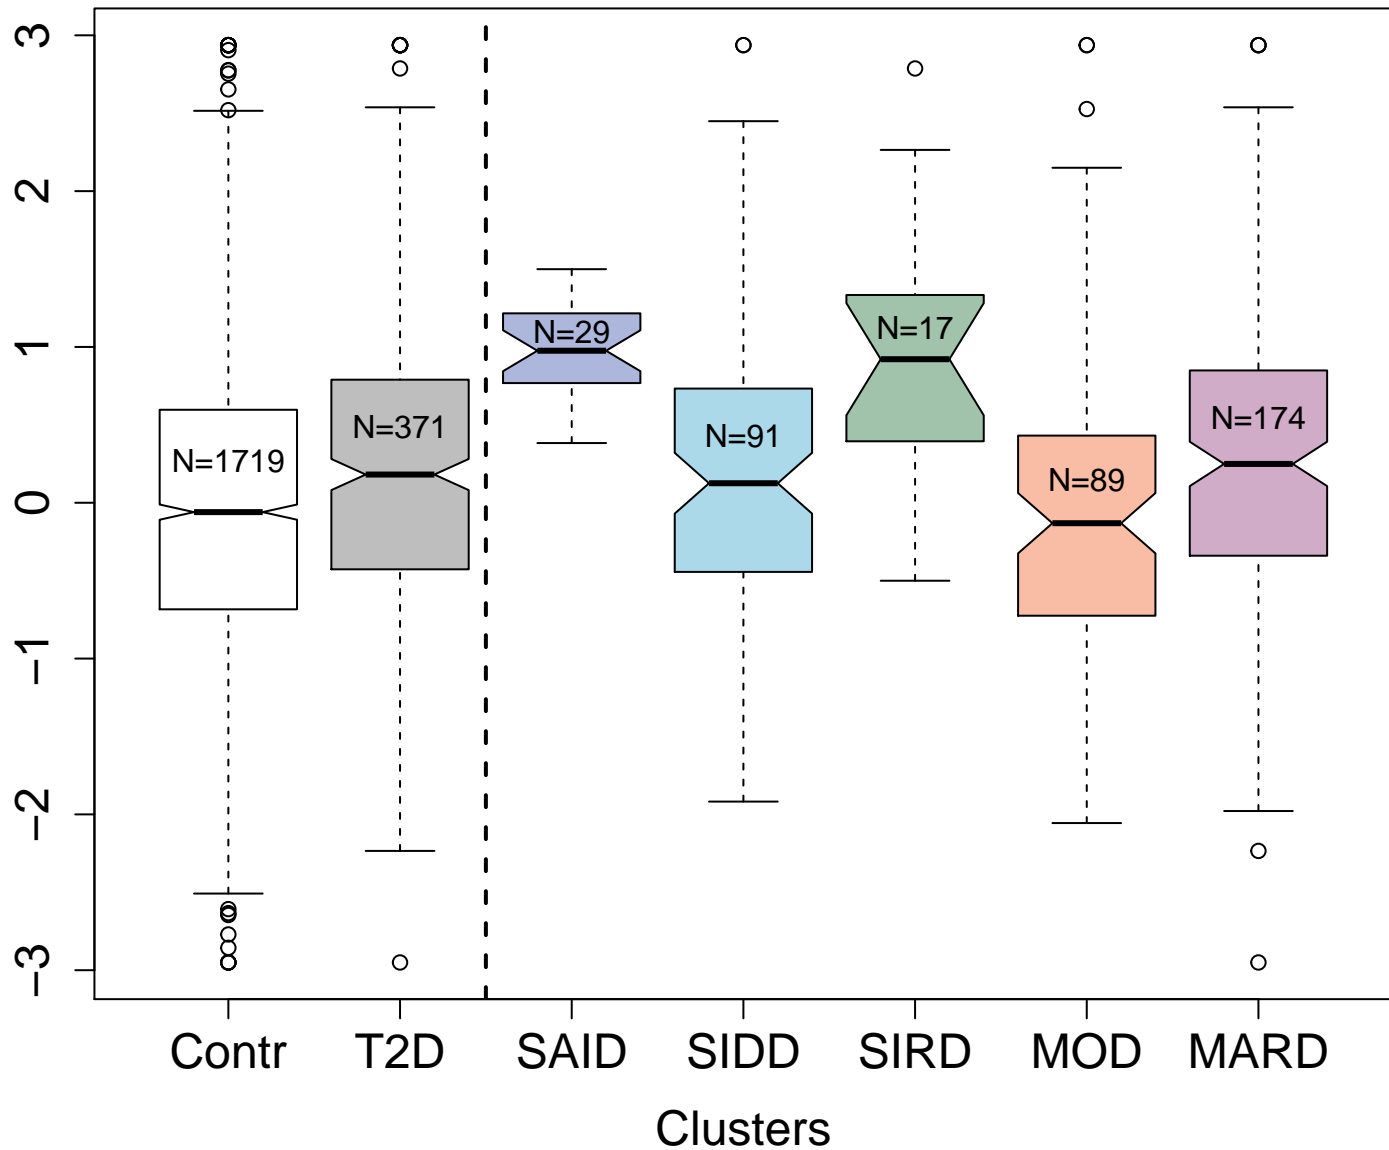

M48021: X - 17673

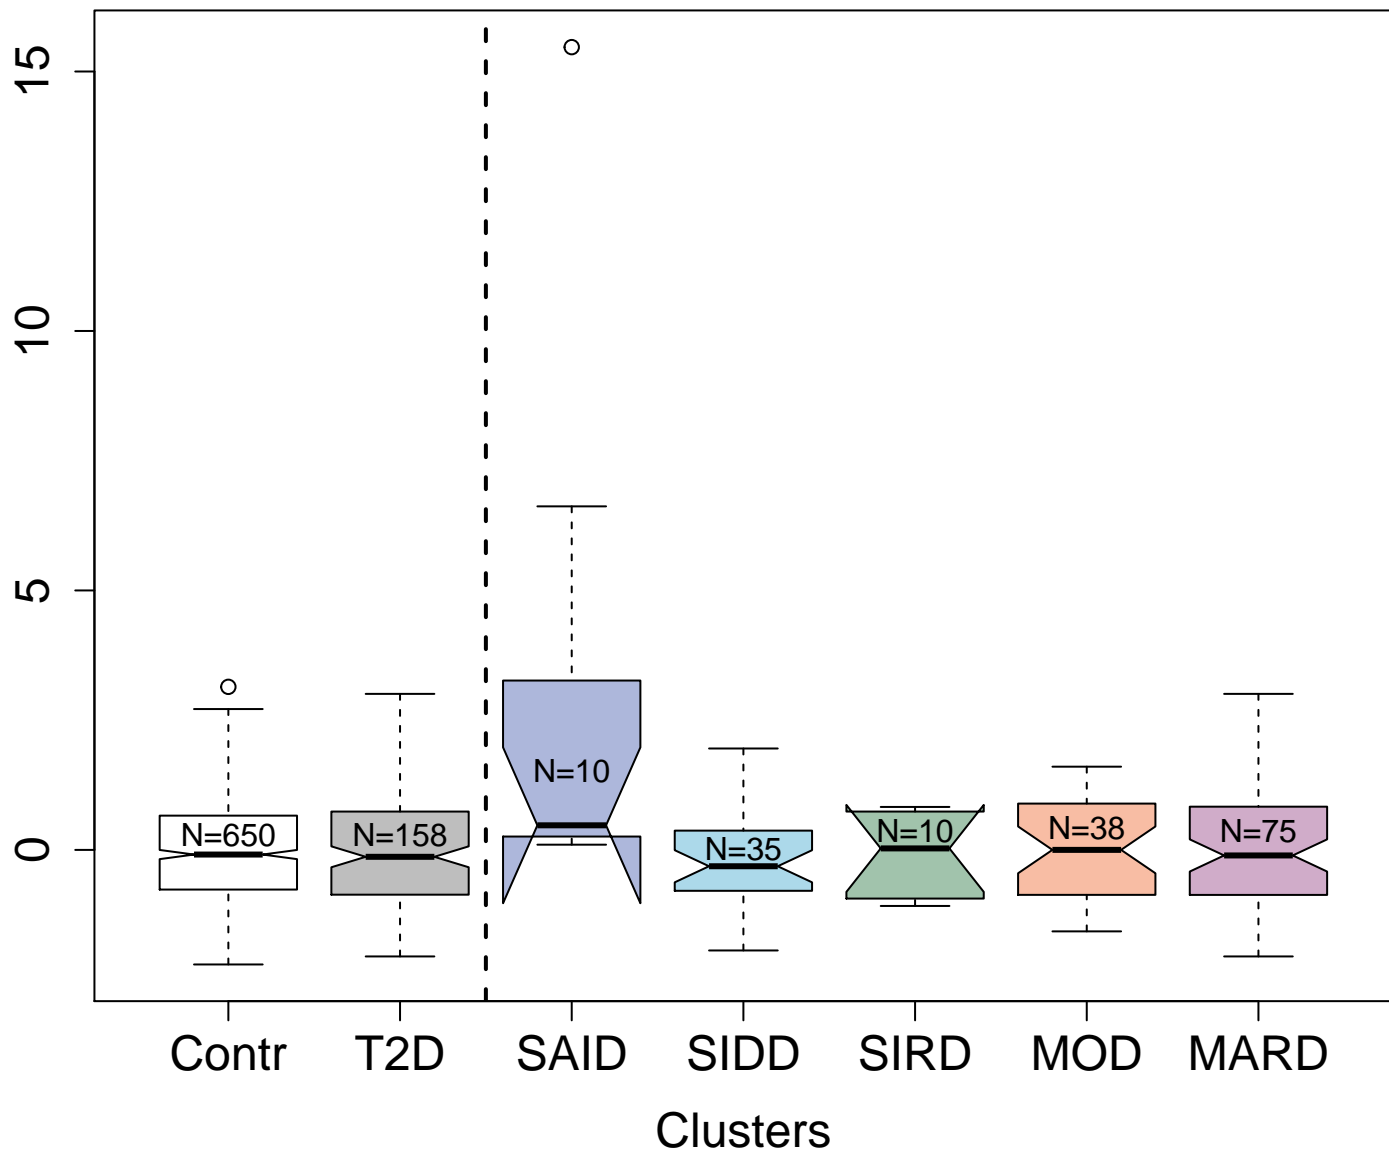

M47417 : X - 22162

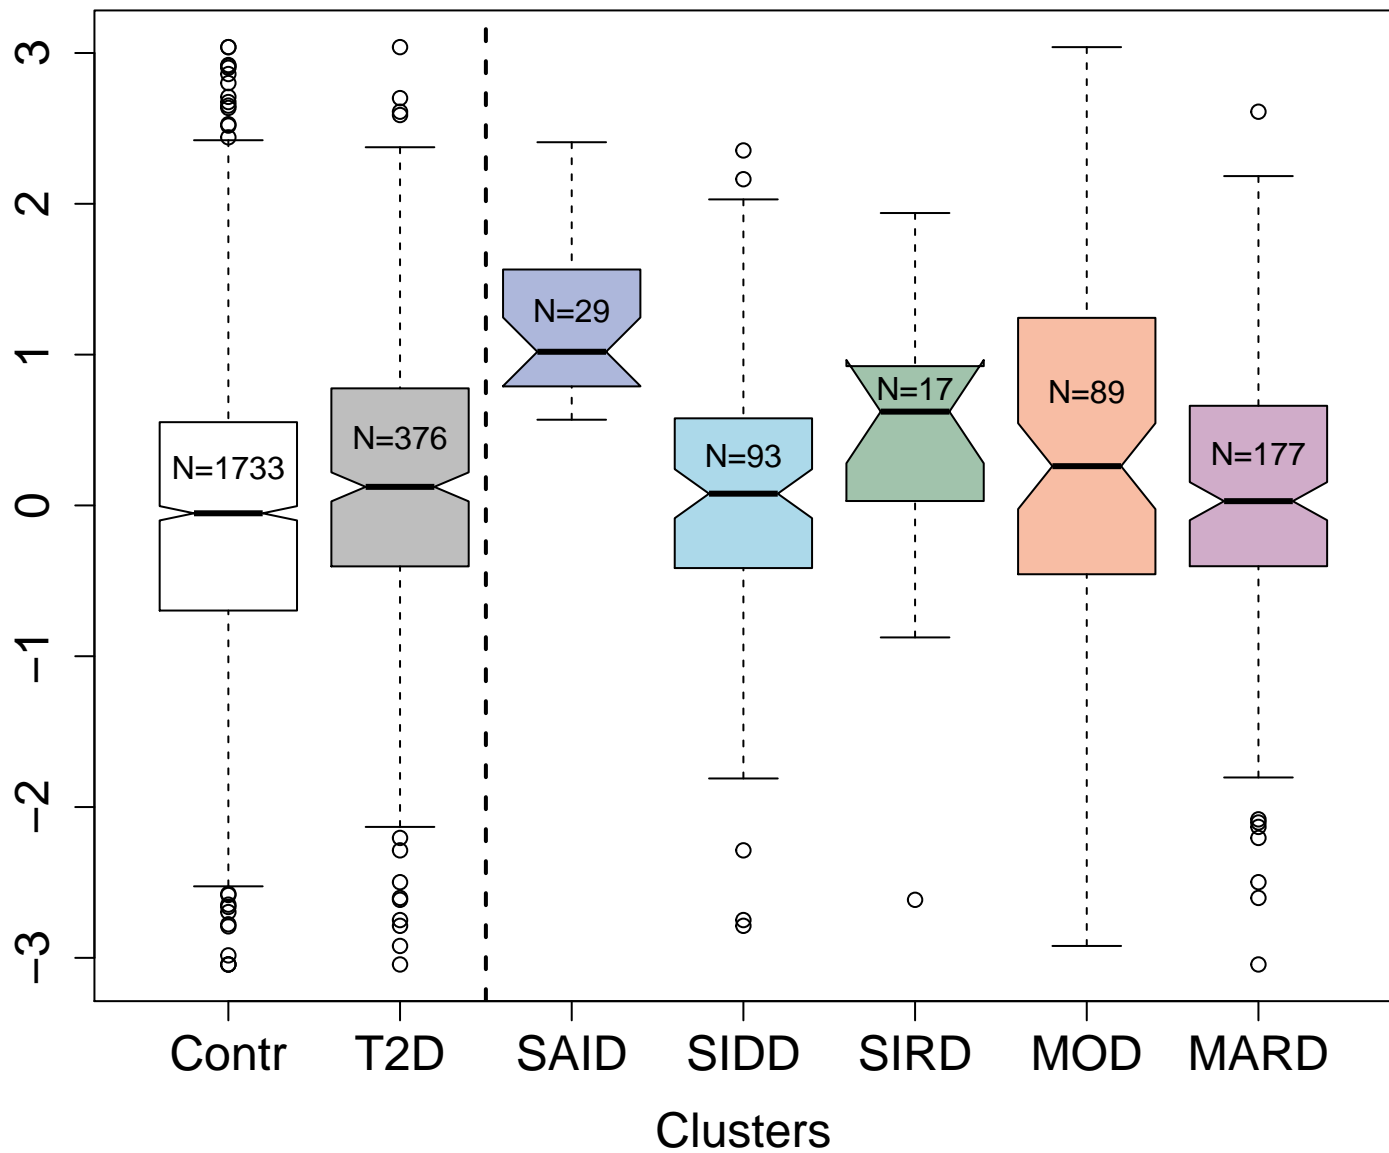



M37372 : 5-HETE

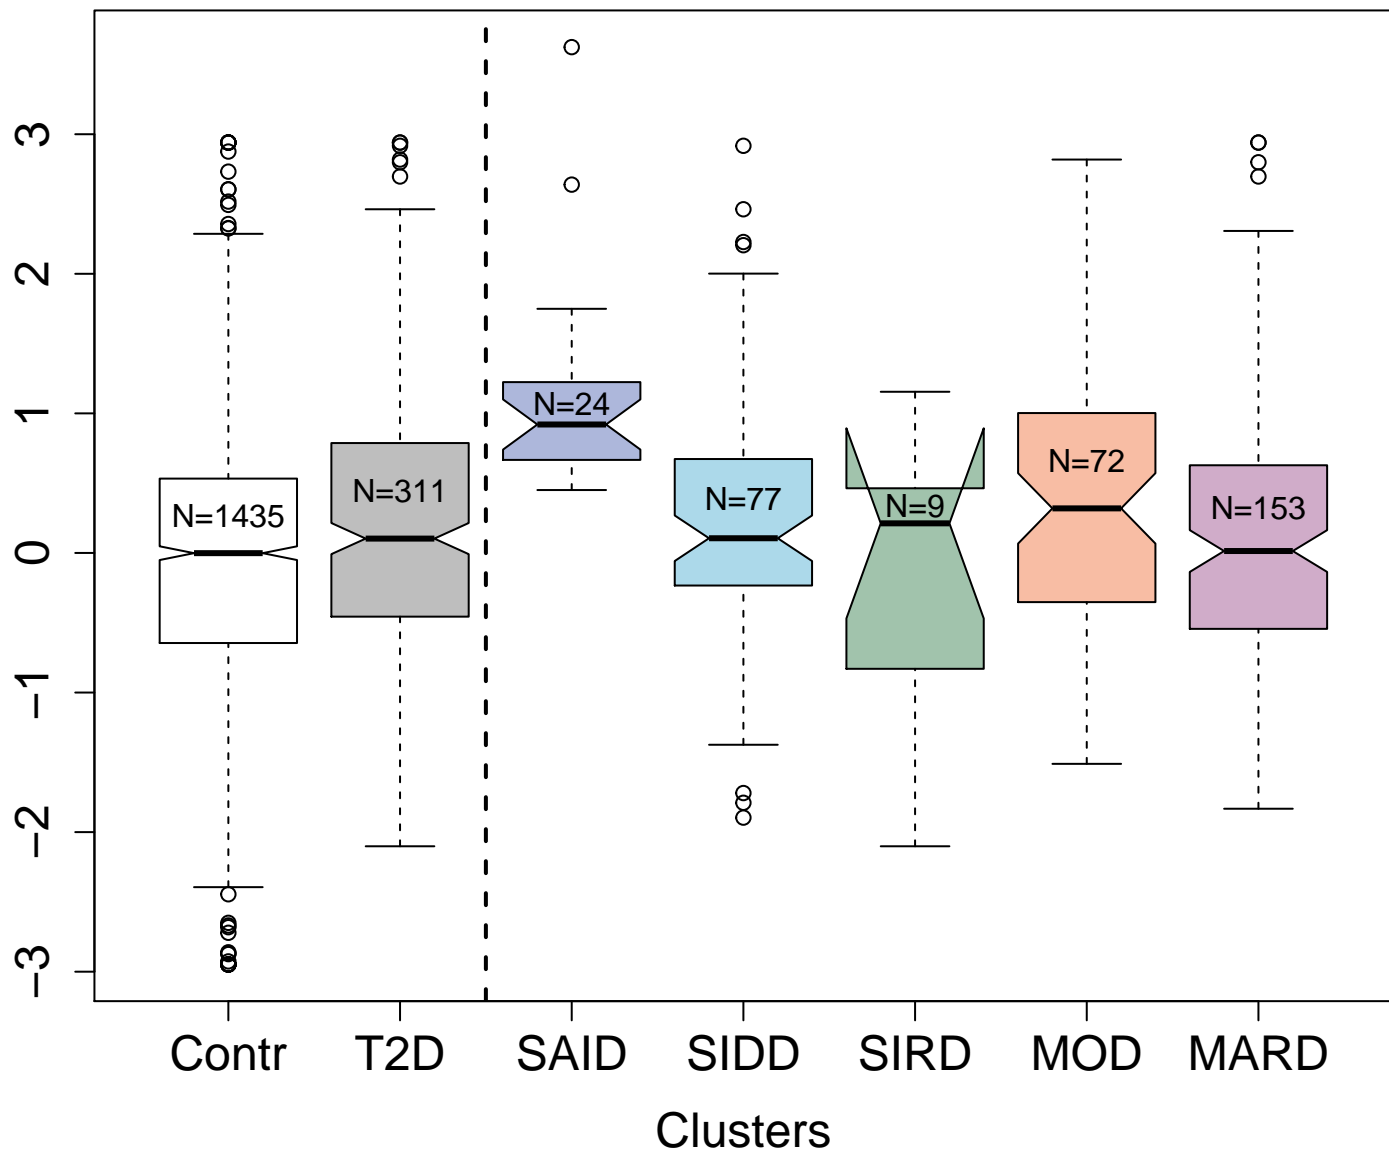

M37185 : 5alpha-androstan-3alpha,17beta-diol monosulfate

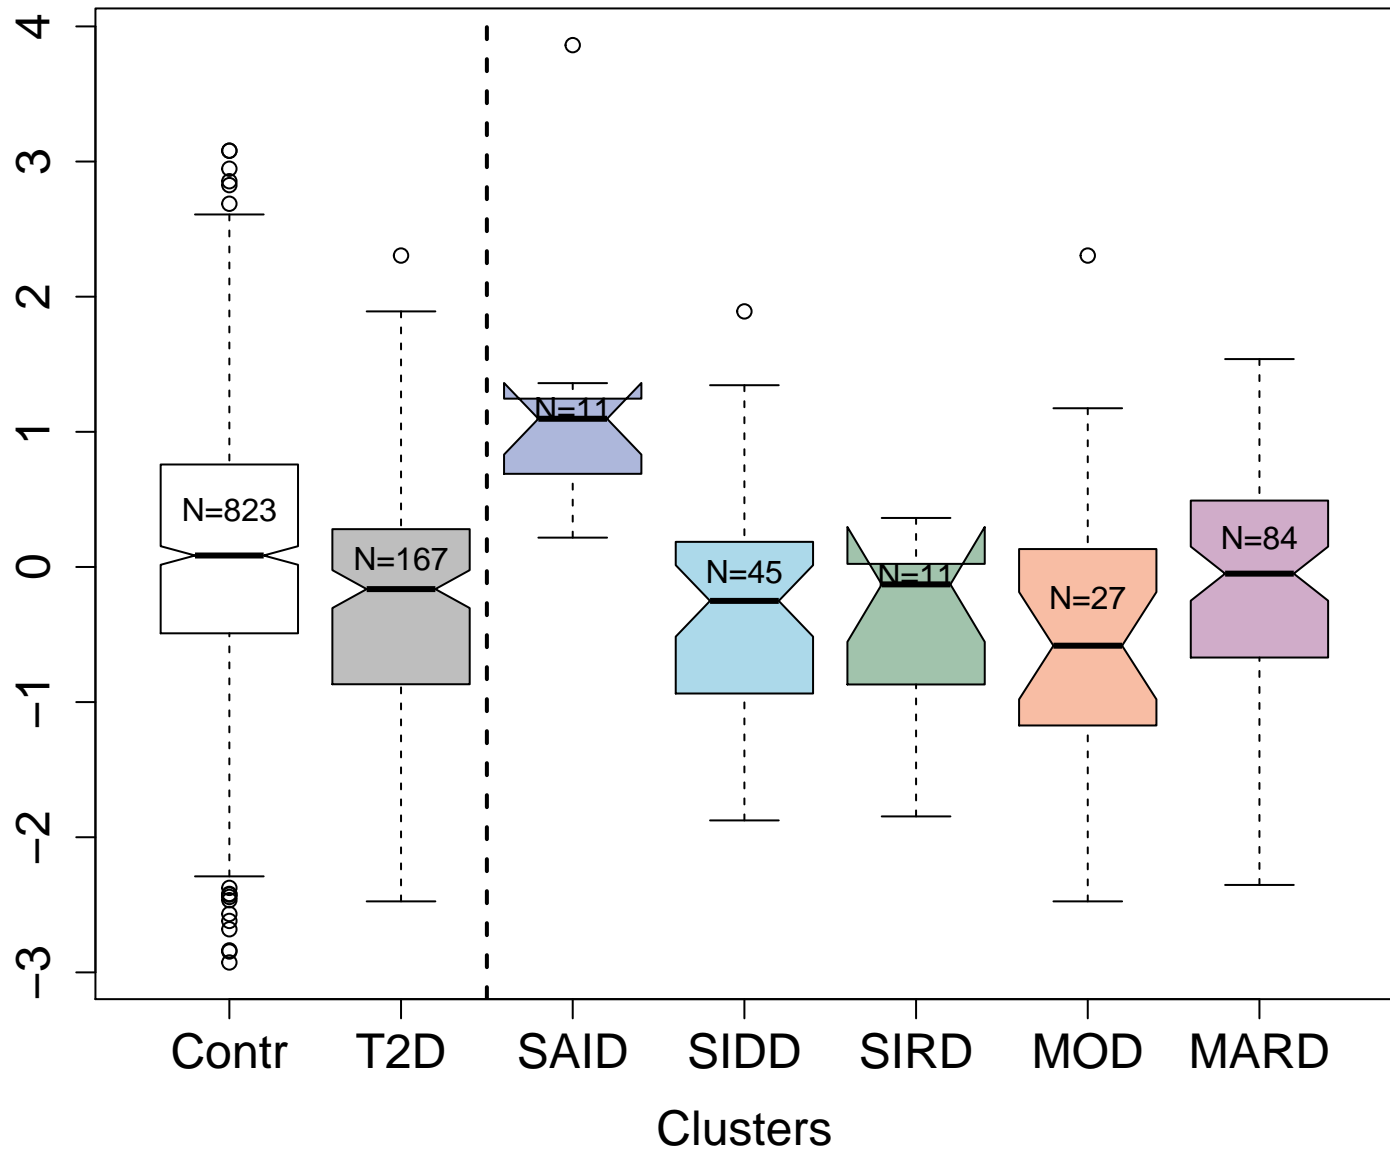

M37203 : androstenediol (3beta,17beta) disulfate (2)

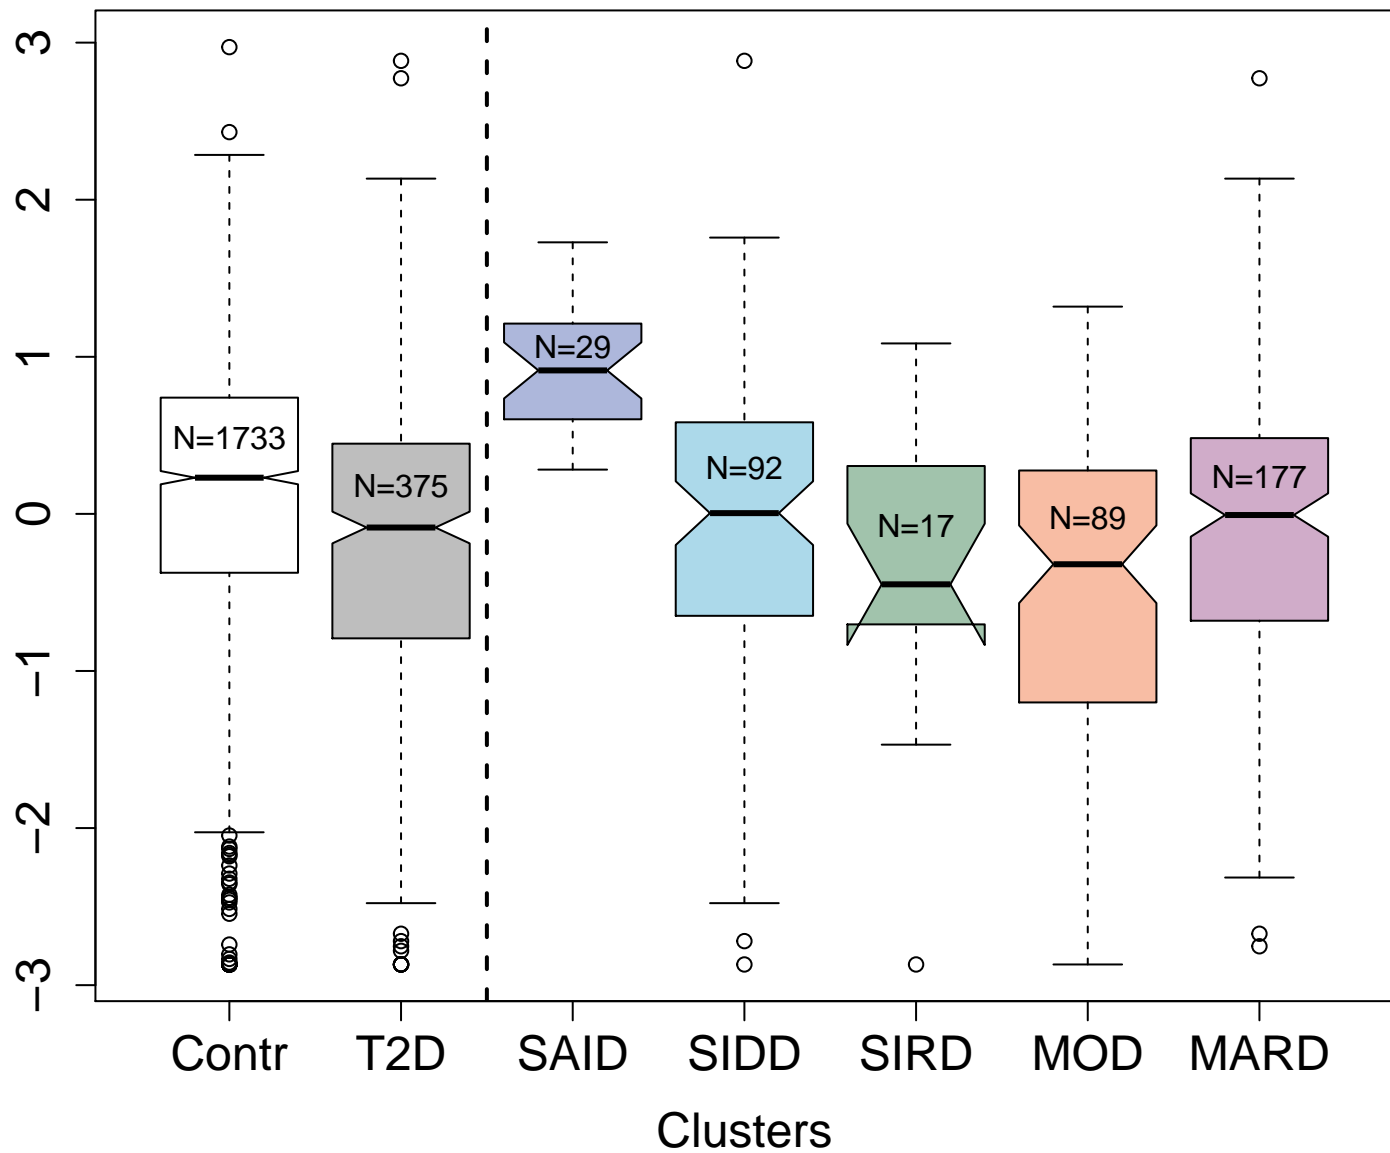

M47028 : X - 21851

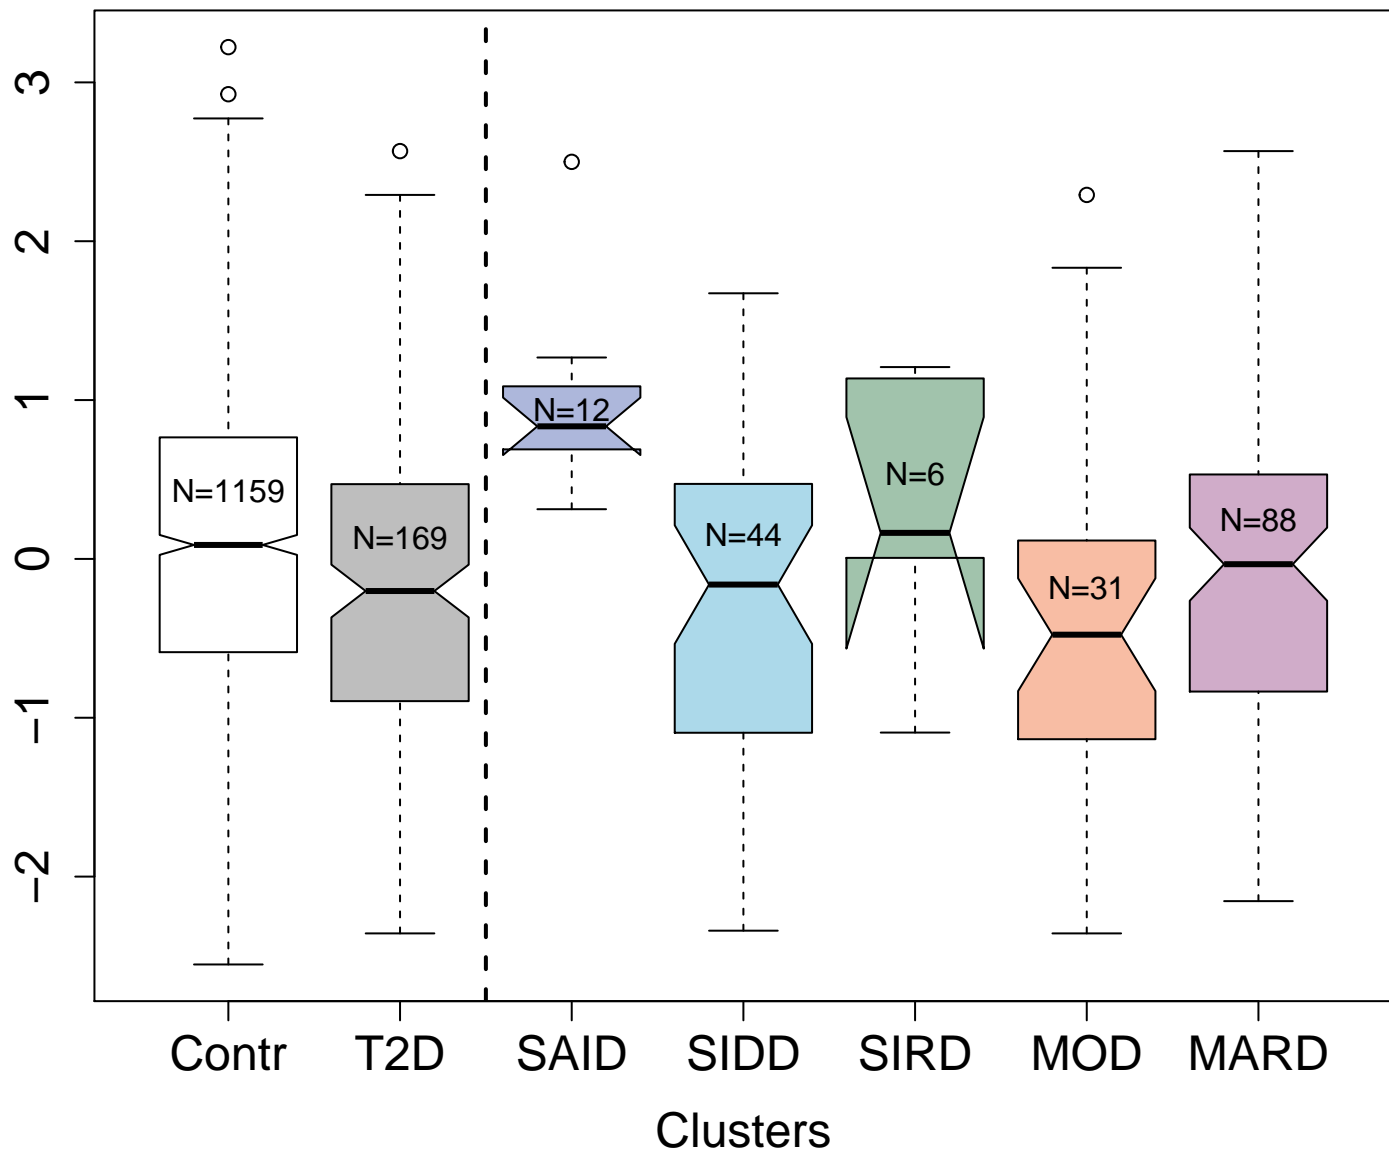

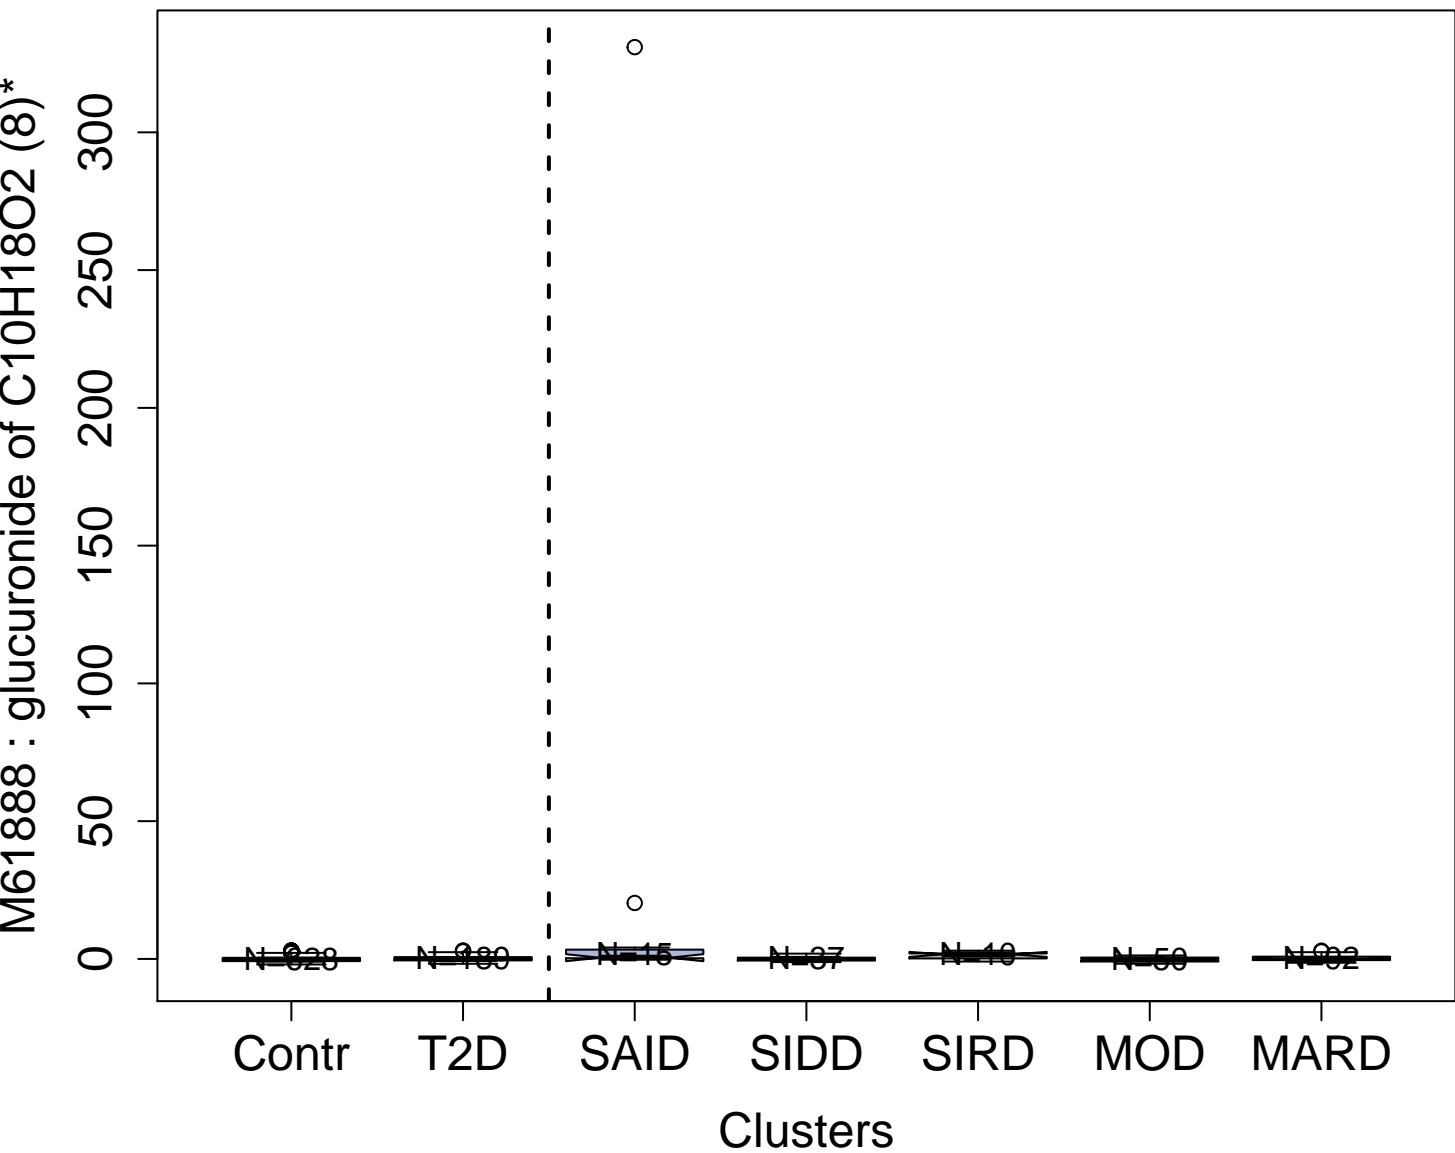

M47650 : X - 11483

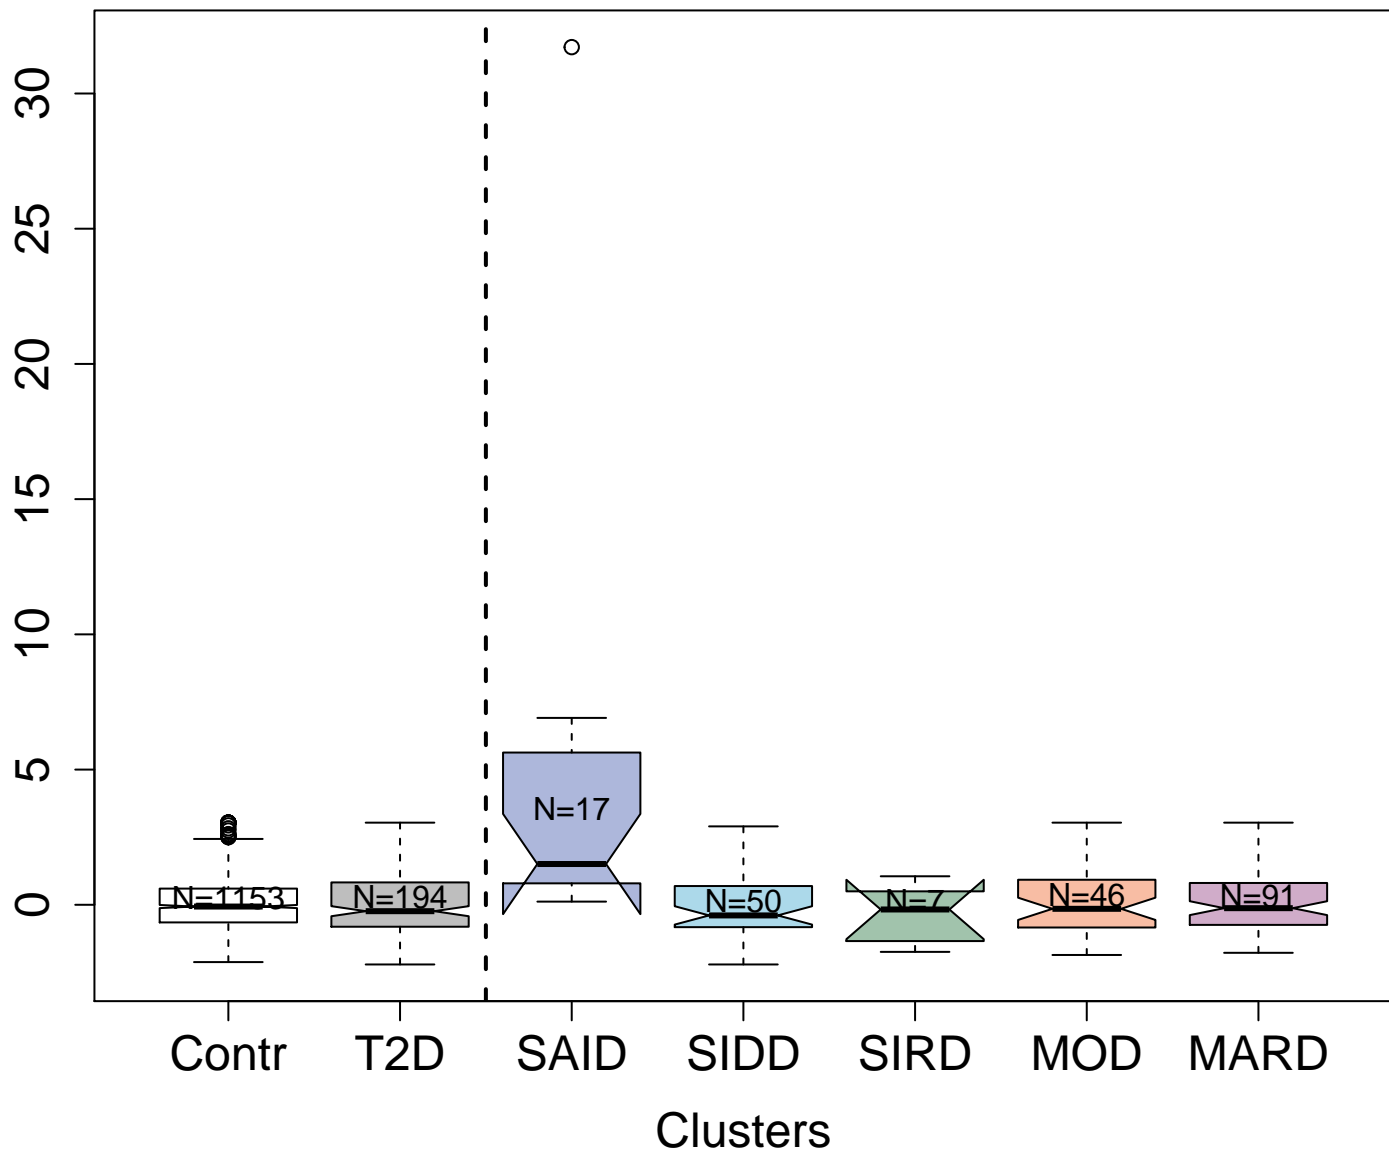

M63254 : N2-acetyl, N6, N6-dimethyllysine

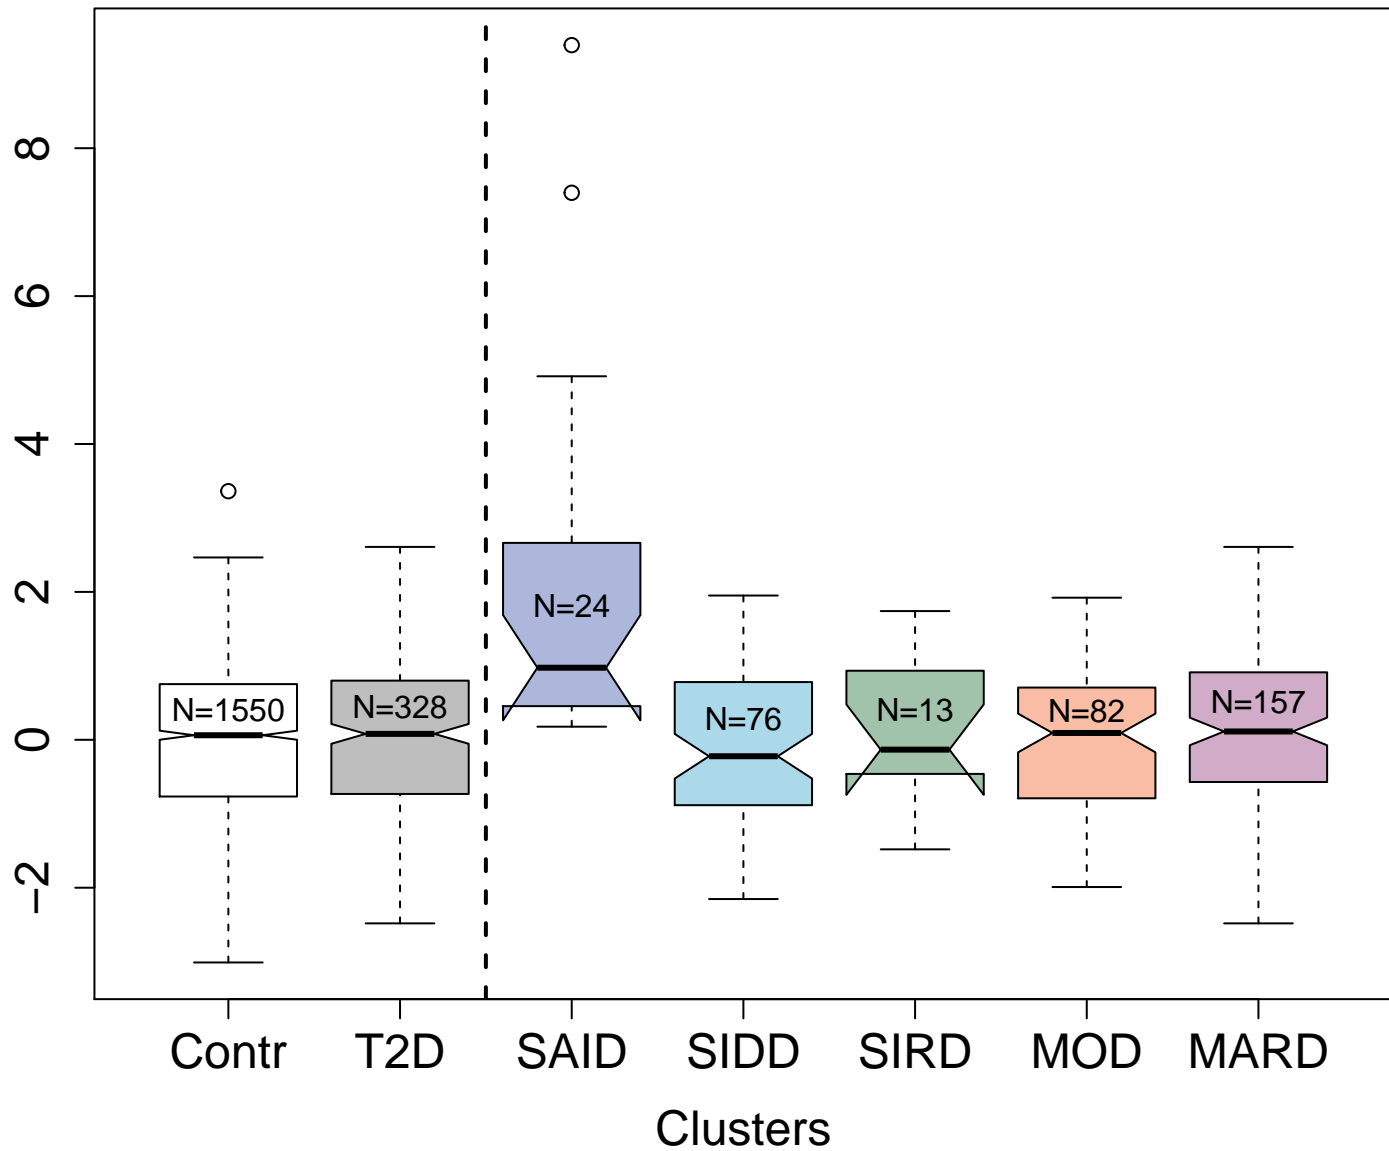

M22137 : homoarginine

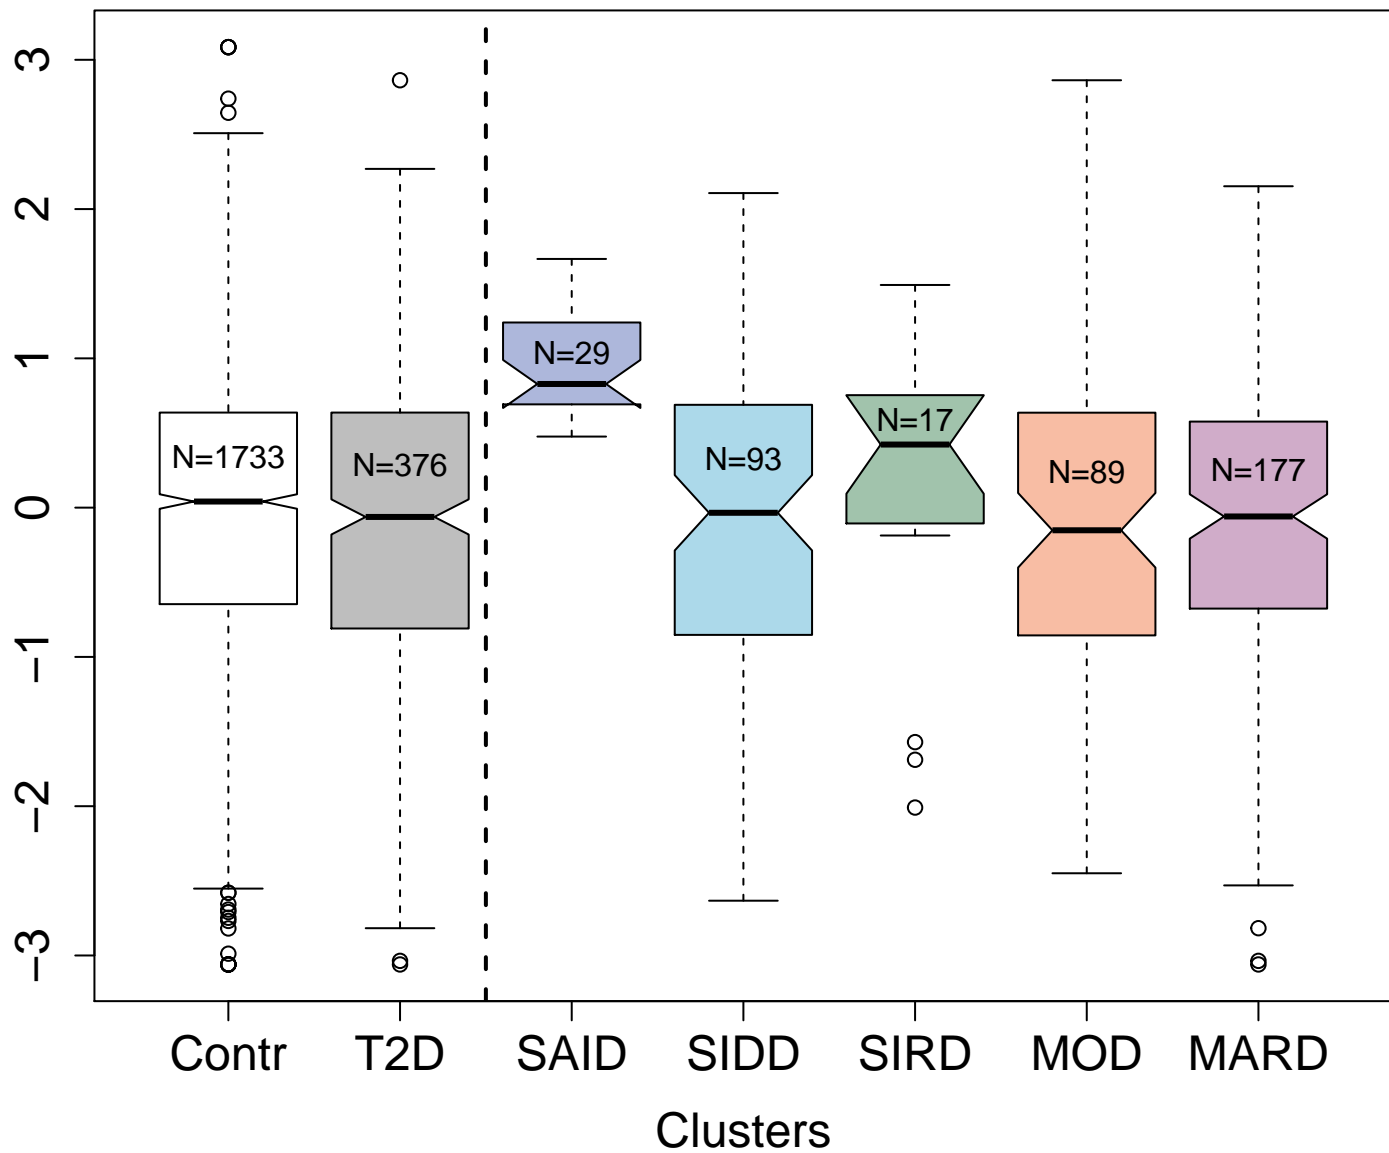



M61769 : 5-dodecenoylcarnitine (C12:1)

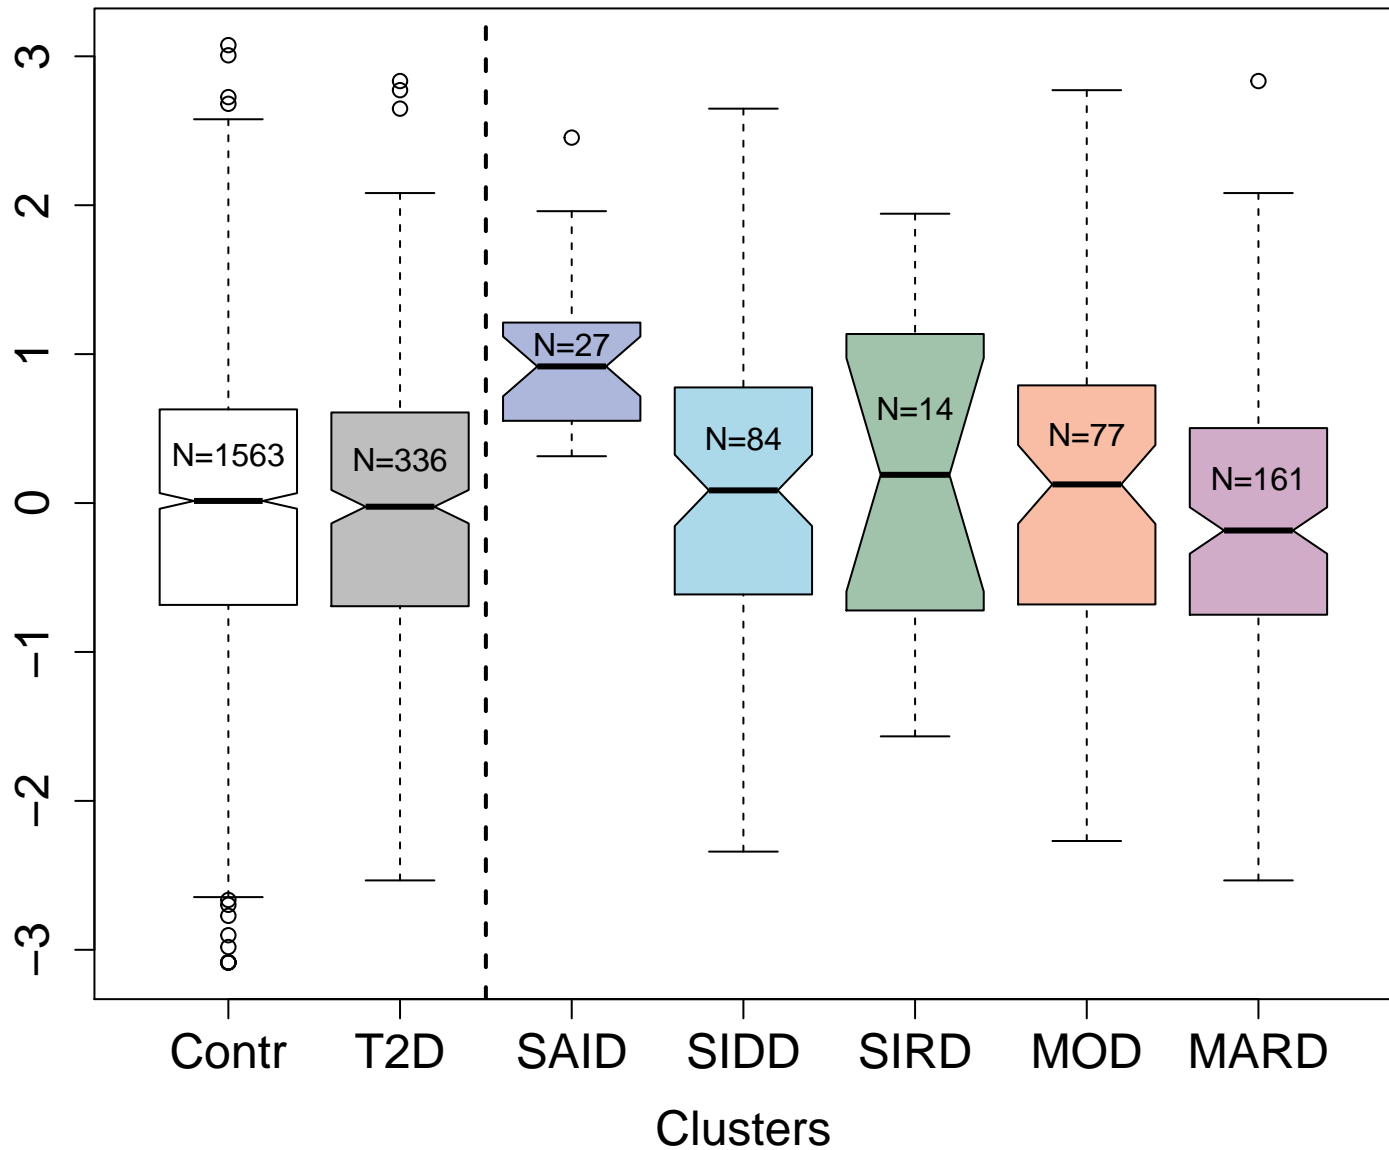

M62793 : tetrahydrocortisol sulfate (1)

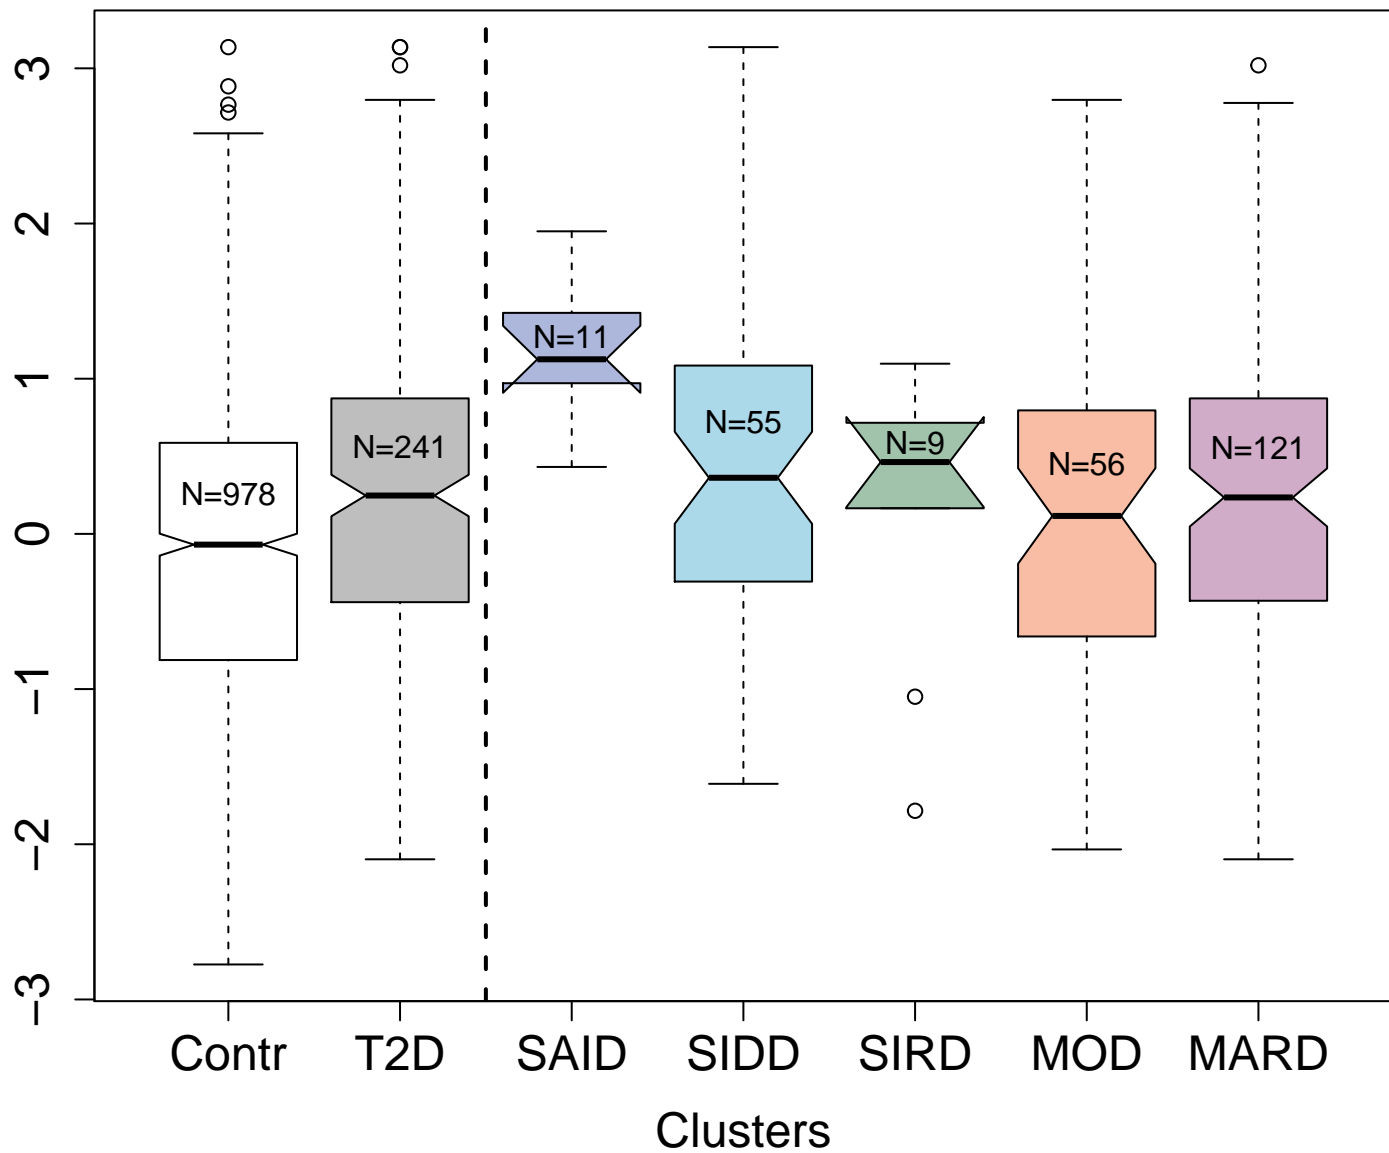

M47016 : X - 21839

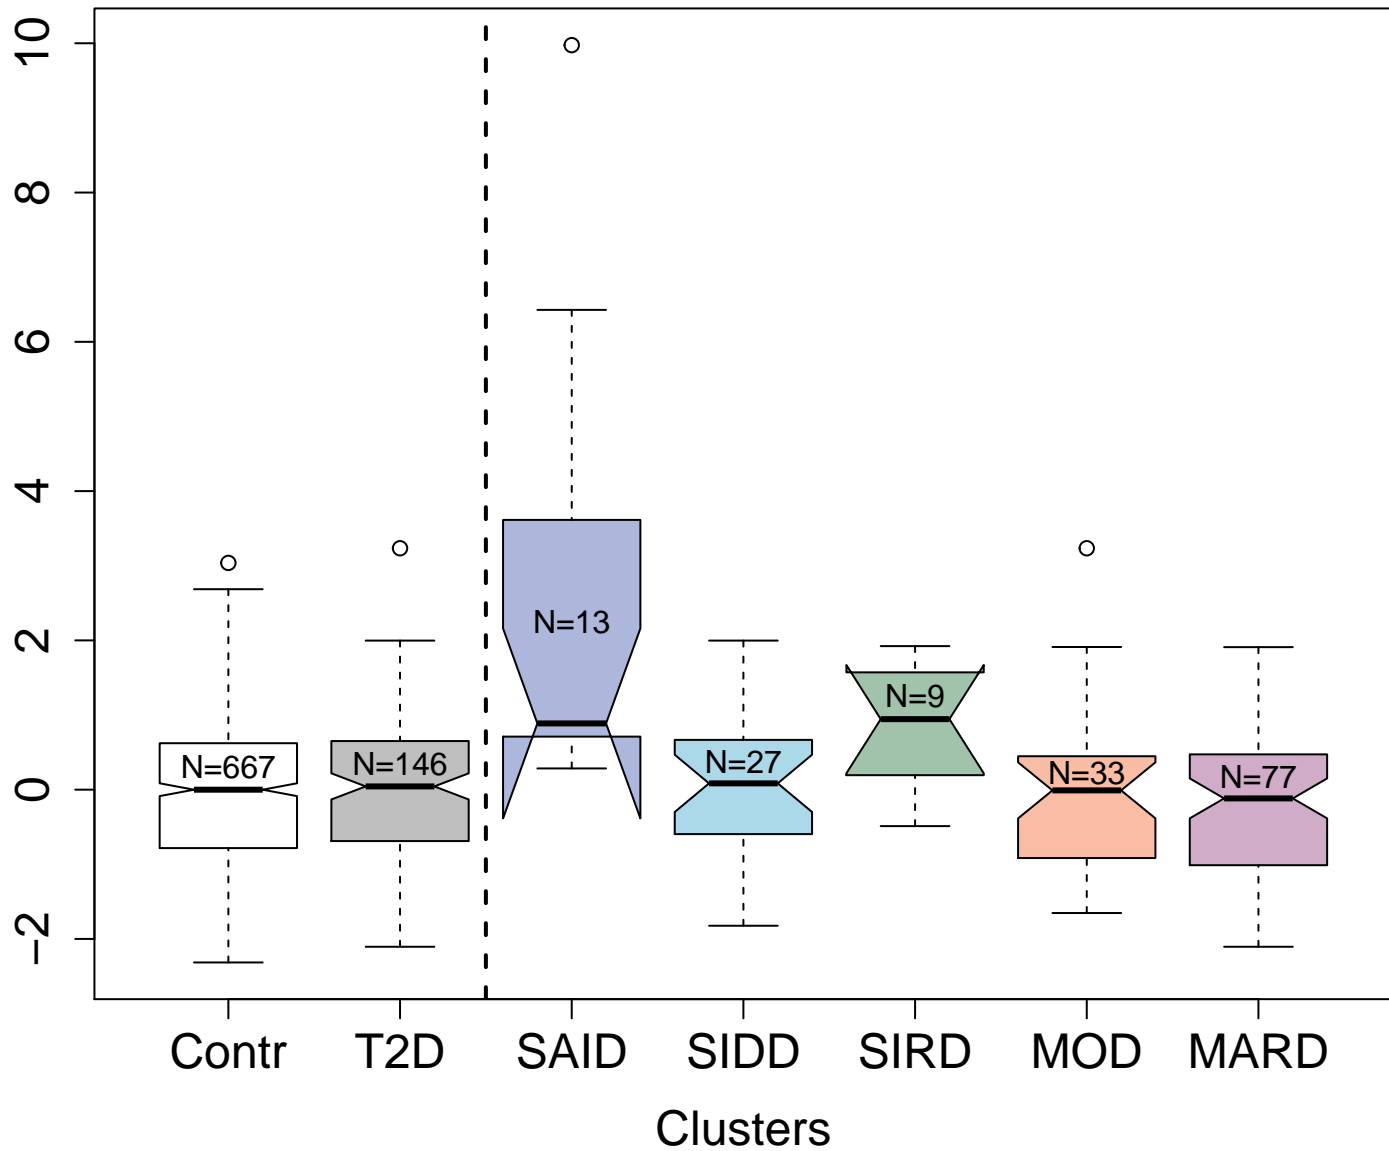

M45951 : 1-linolenyl-GPC (18:3)\*

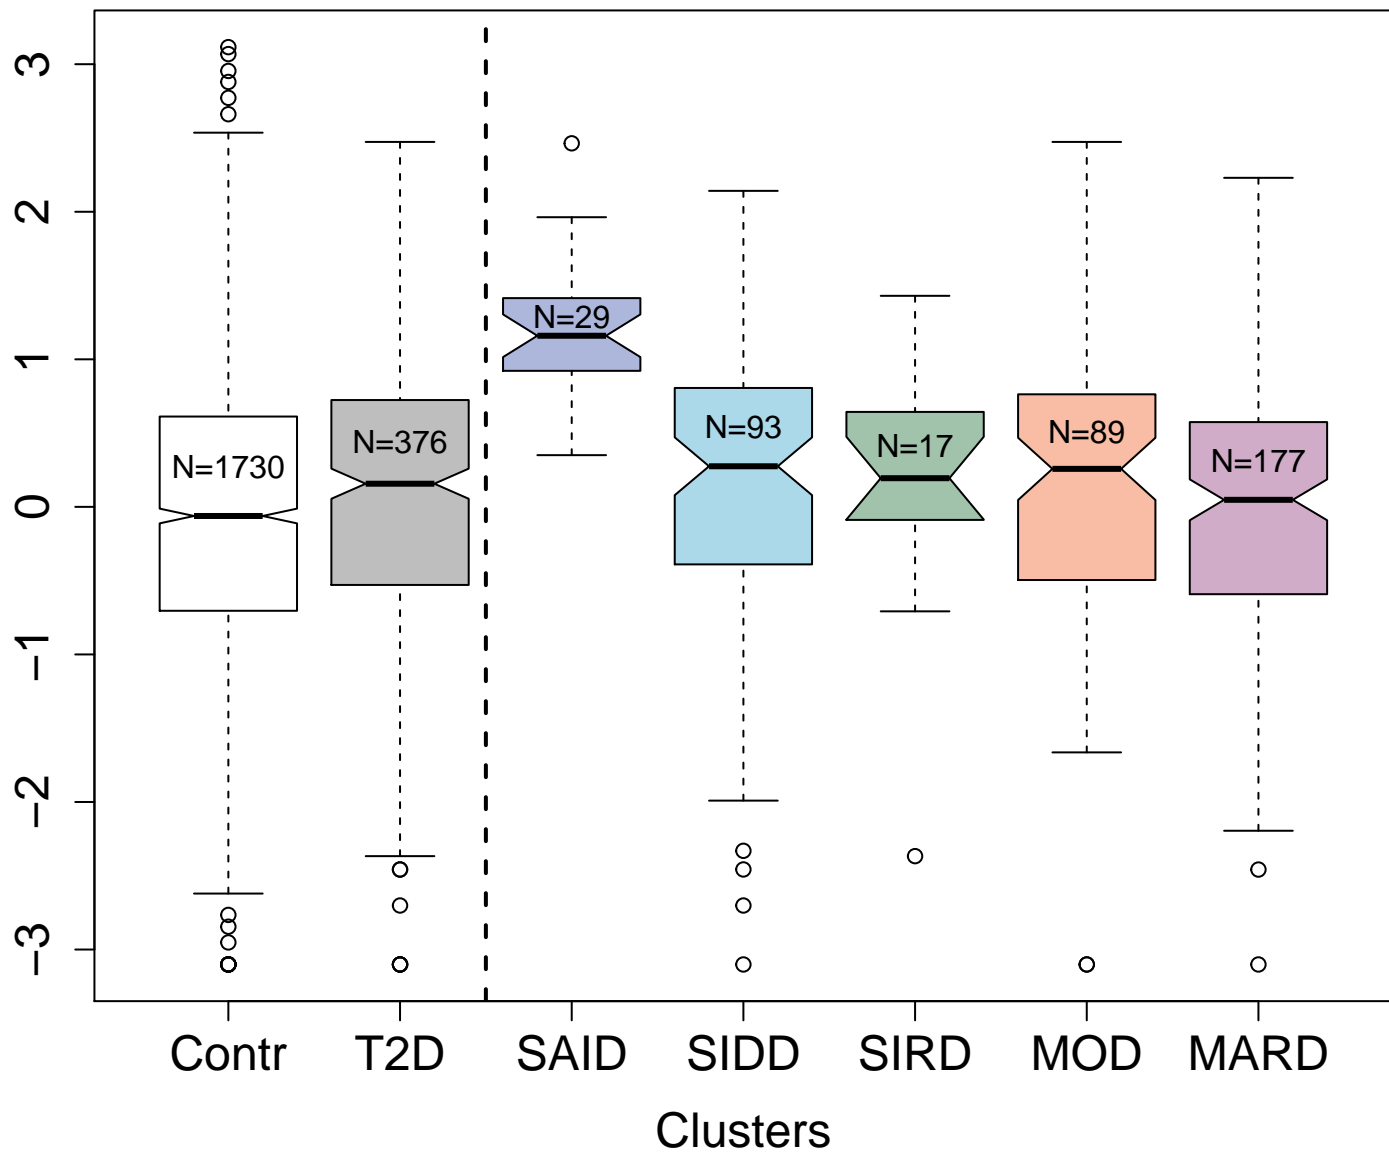

M573 : cytosine

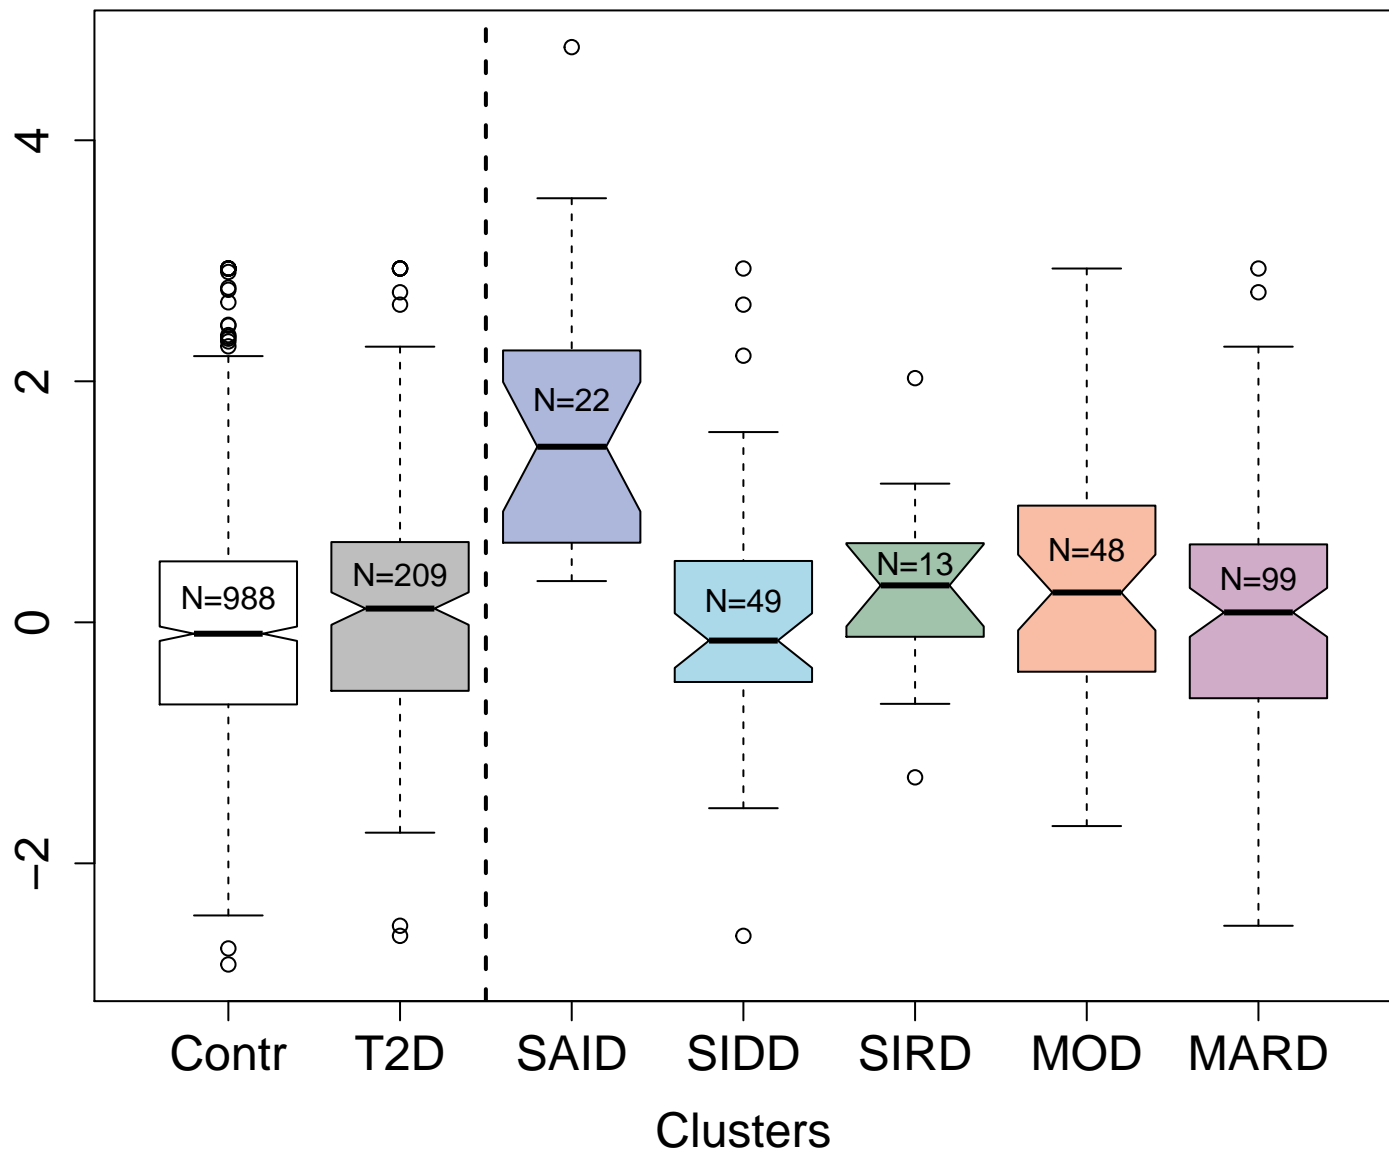

M57595 : glycosyl ceramide (d18:1/20:0, d16:1/22:0)\*

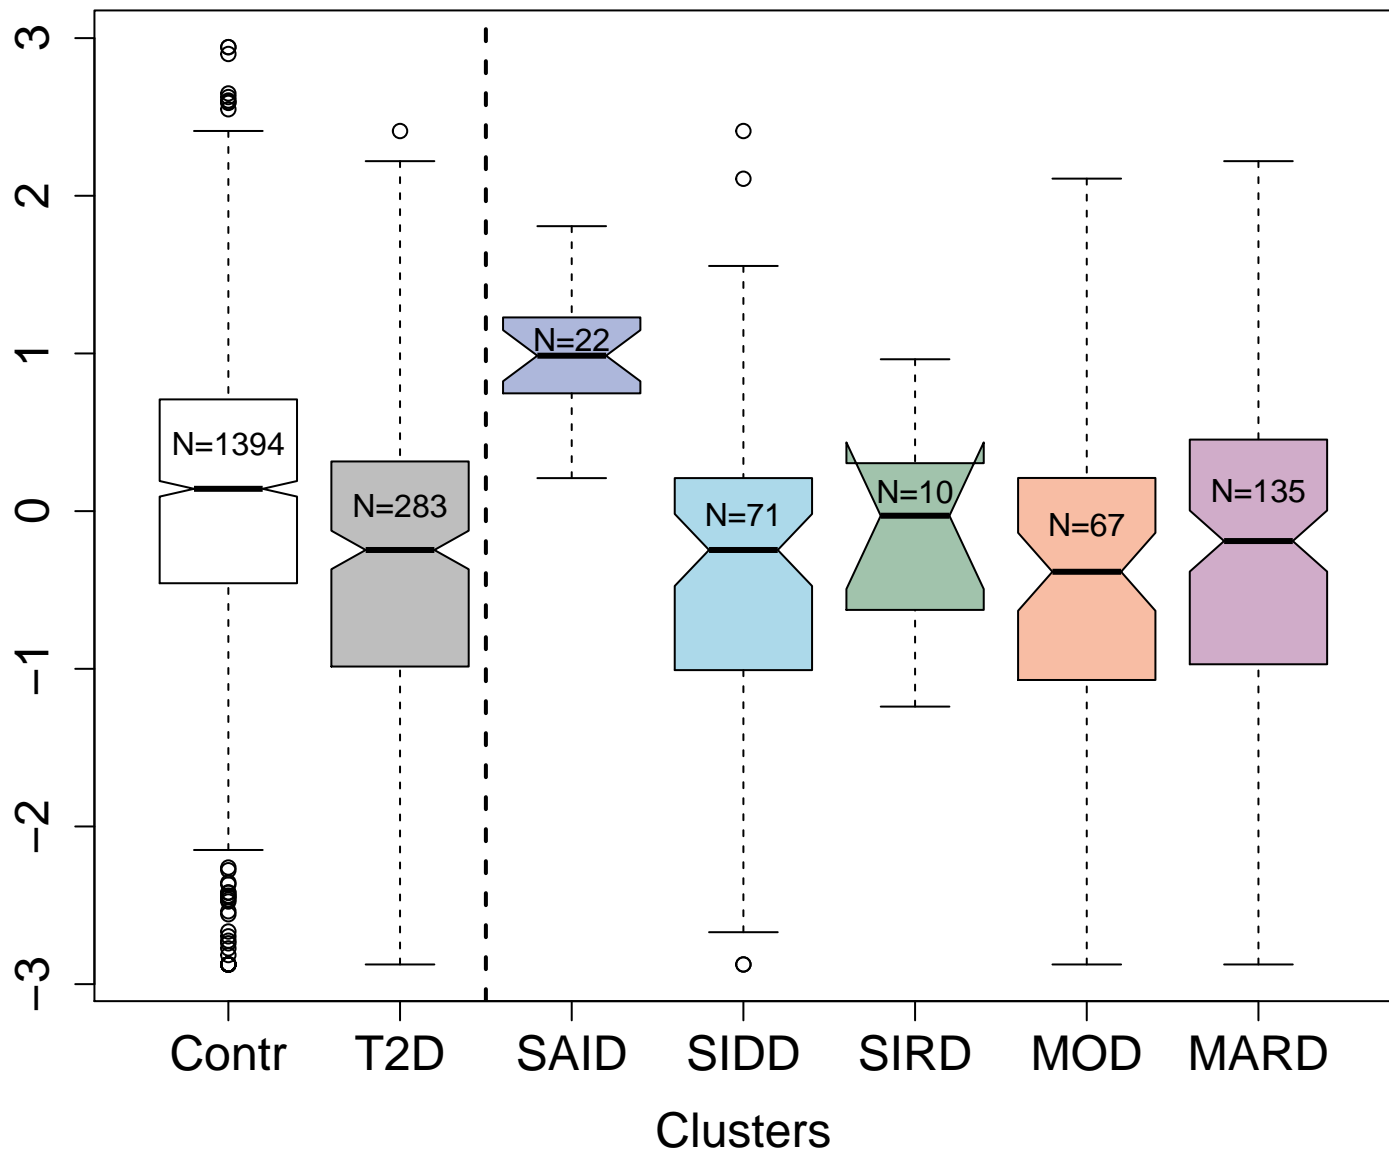

M62496 : X - 25267

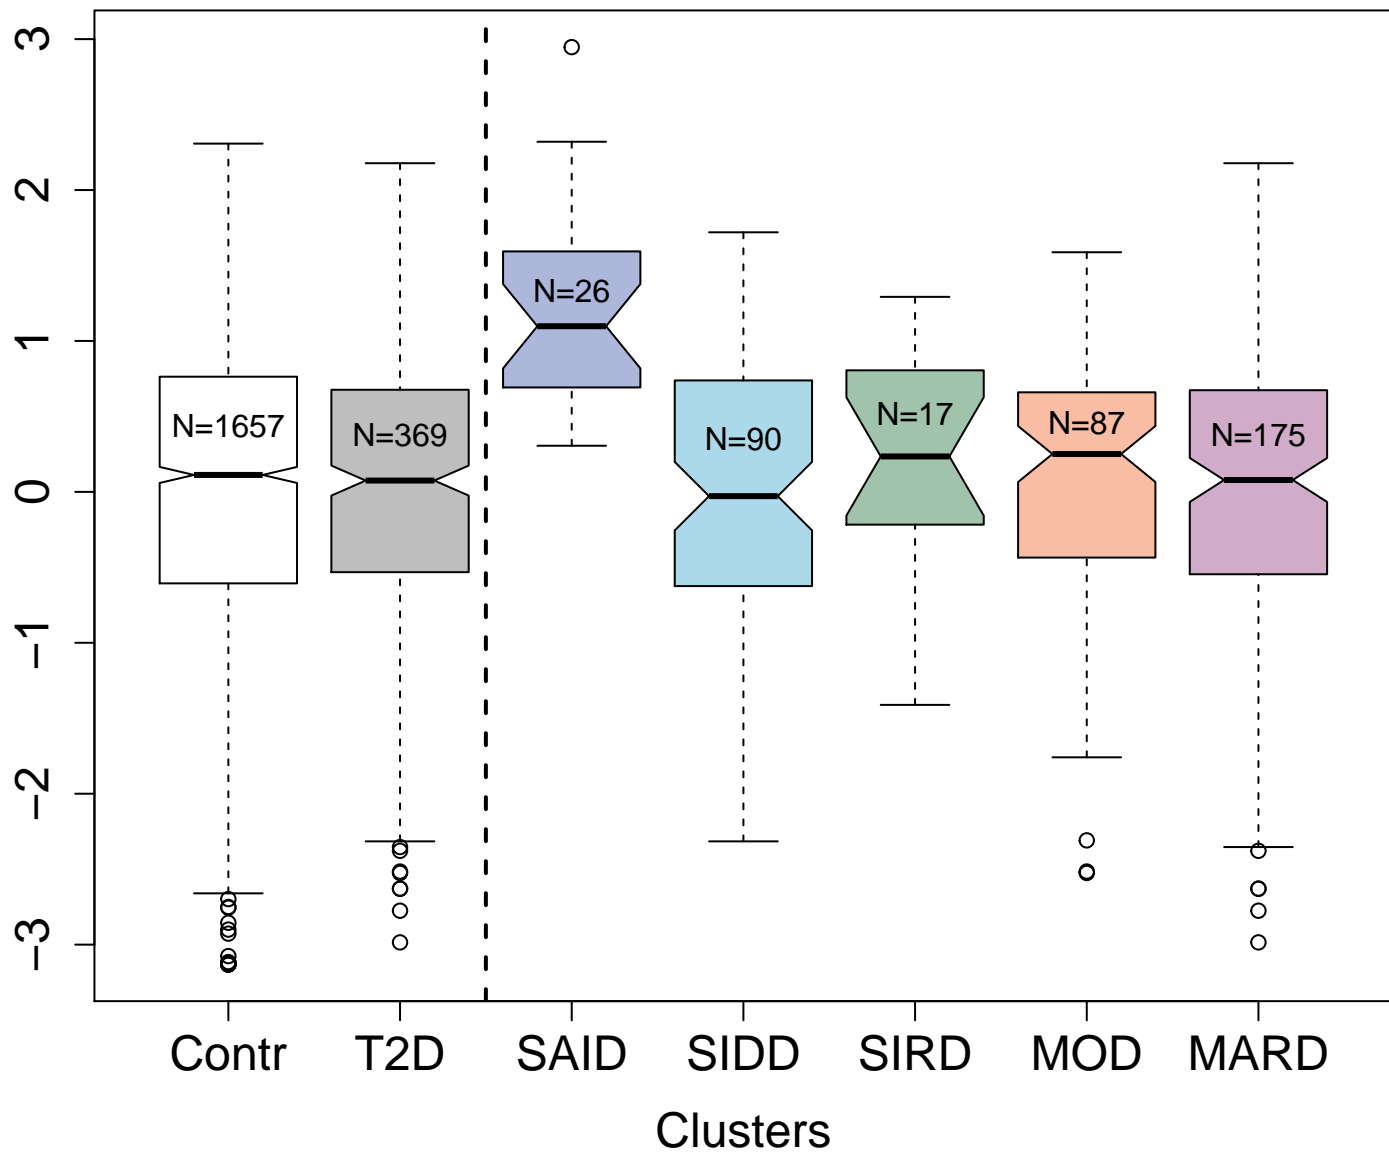

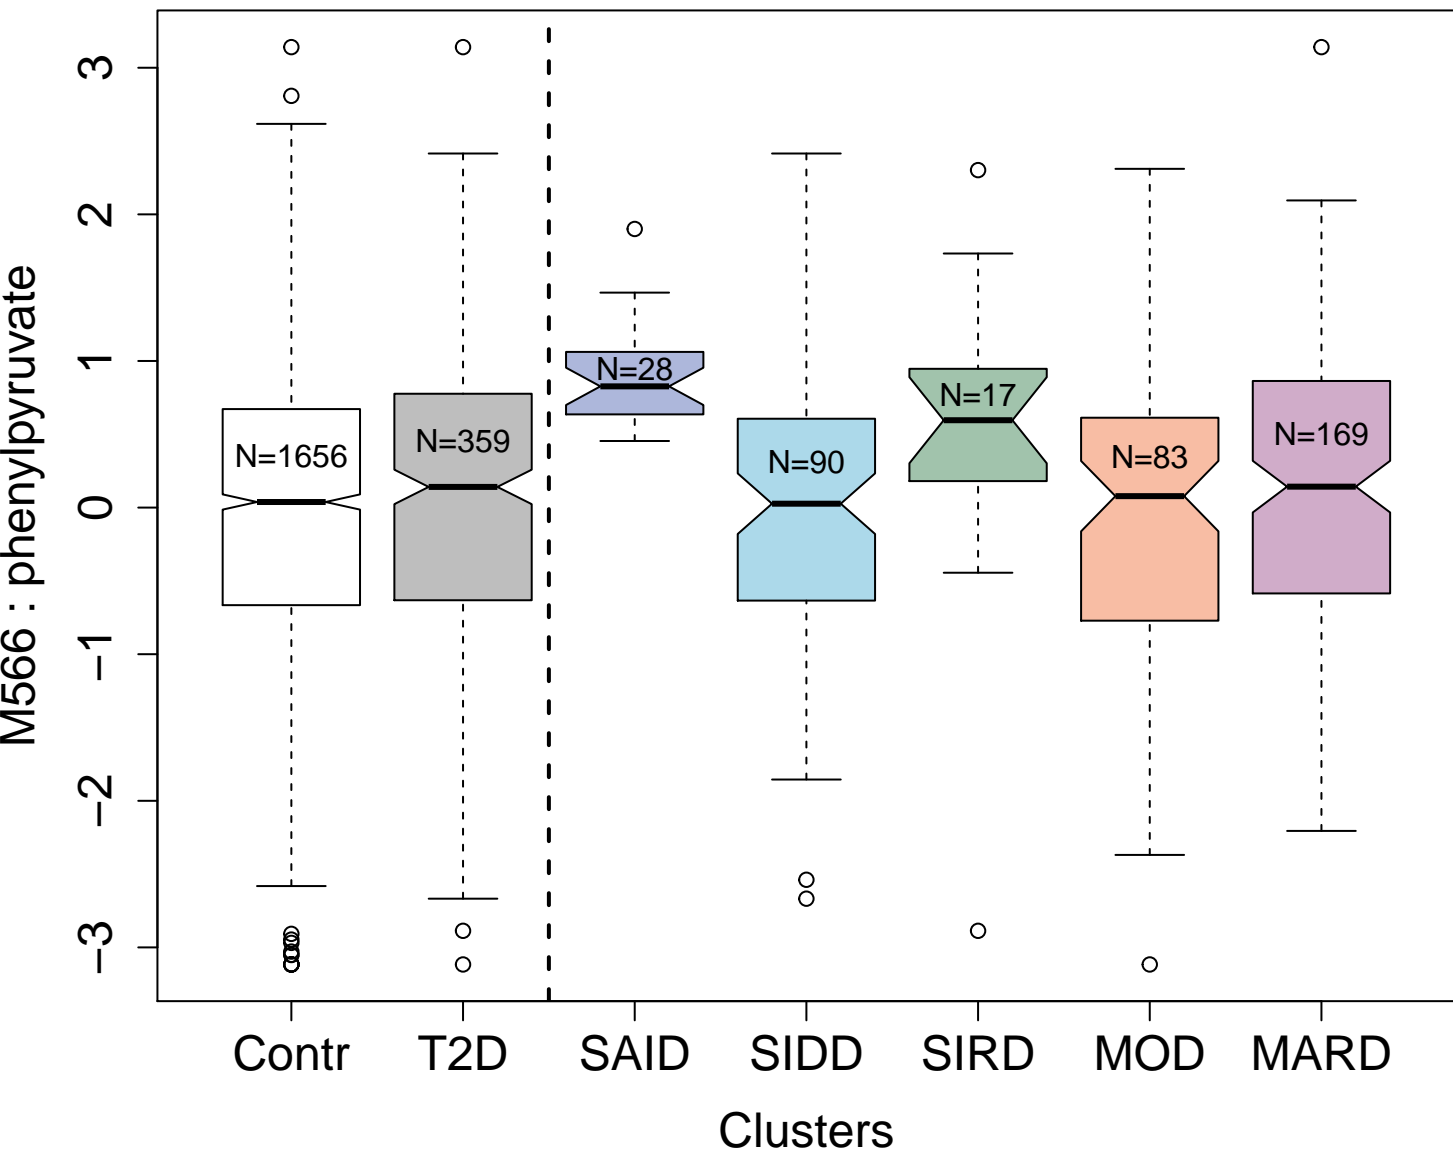



M63853 : vanillic acid glycine

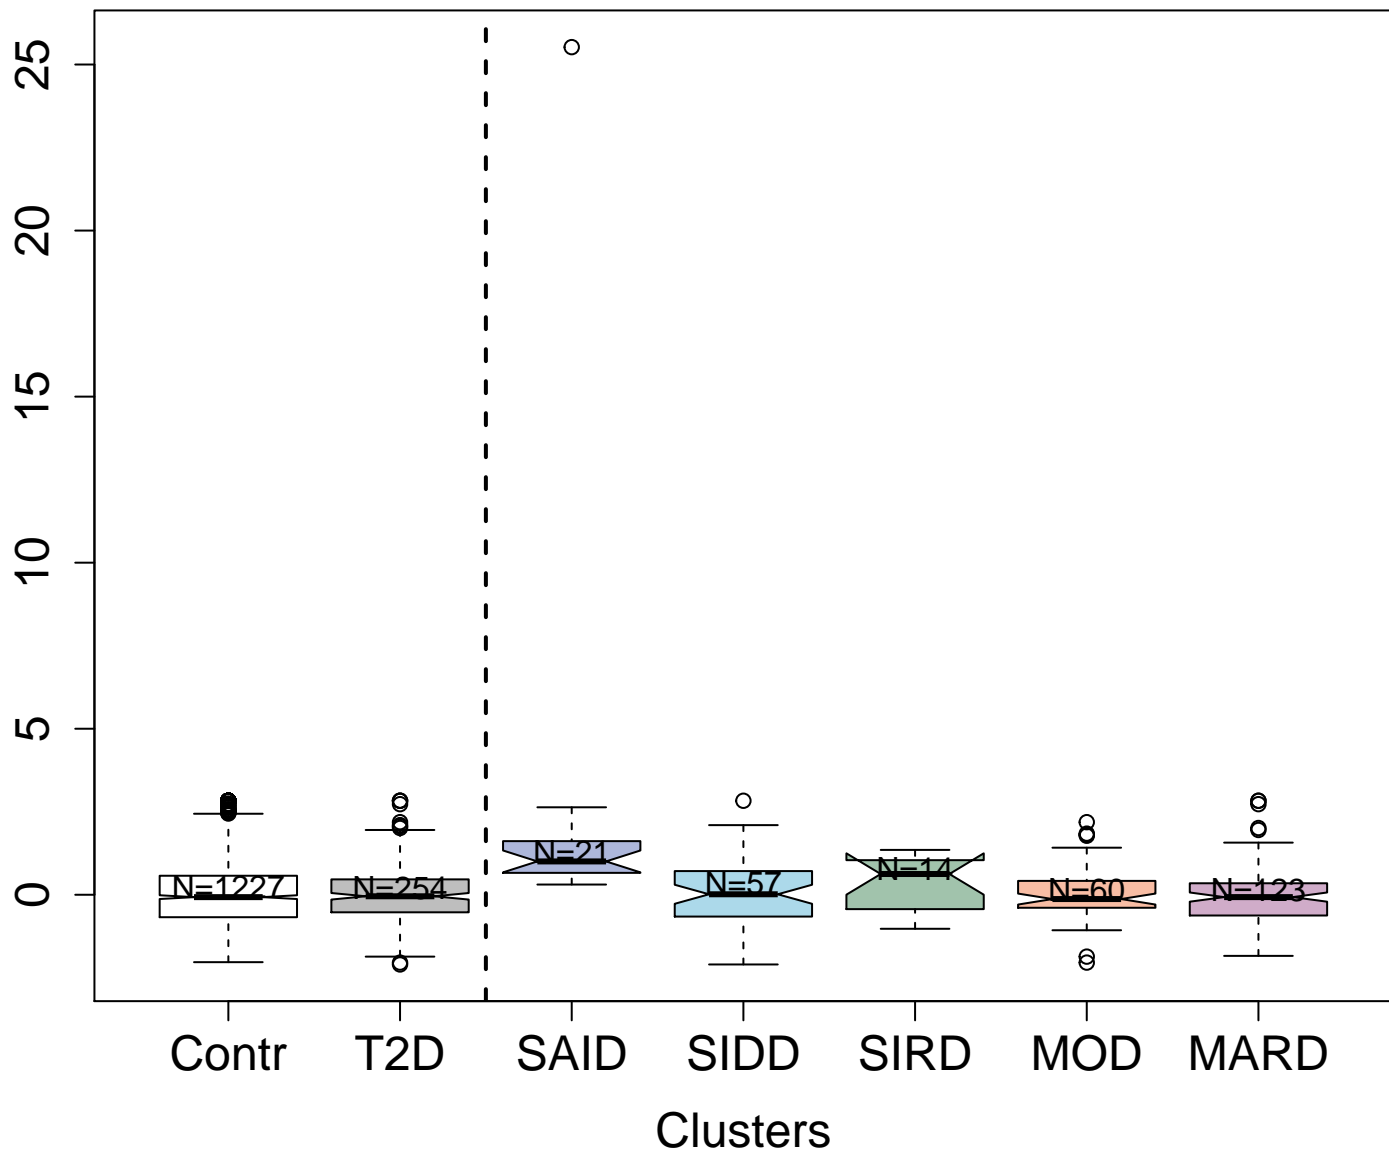

M52450 : 1-palmitoyl-2-linoleoyl-GPI (16:0/18:2)

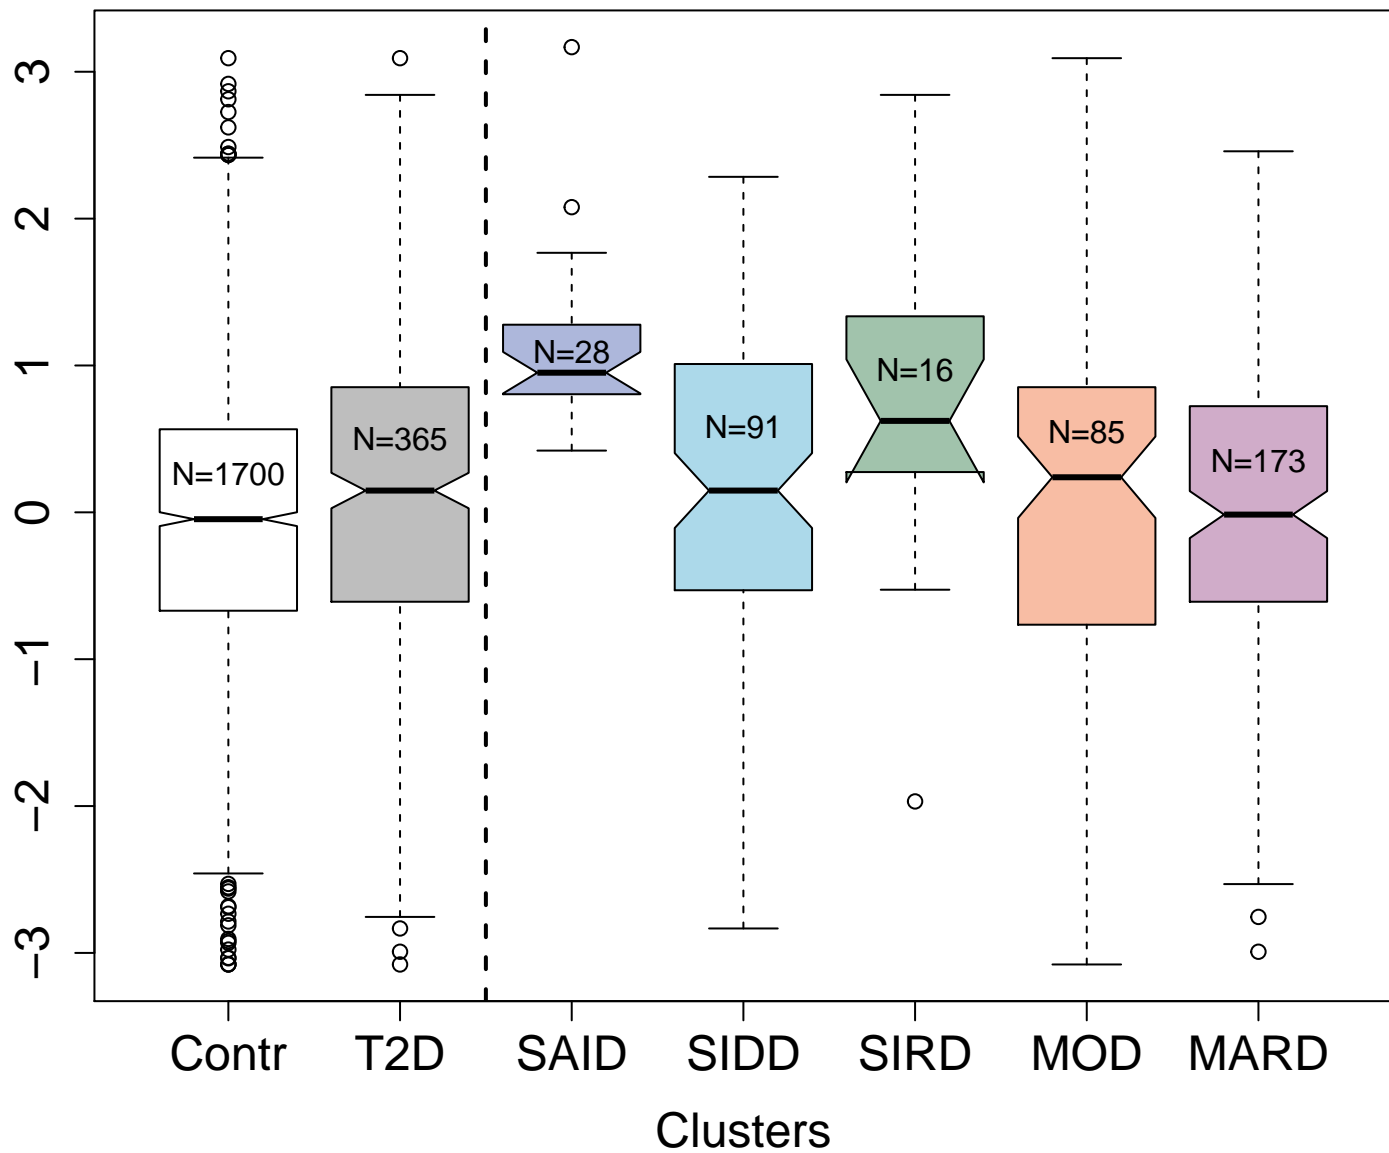

M34445 : sphingosine 1-phosphate

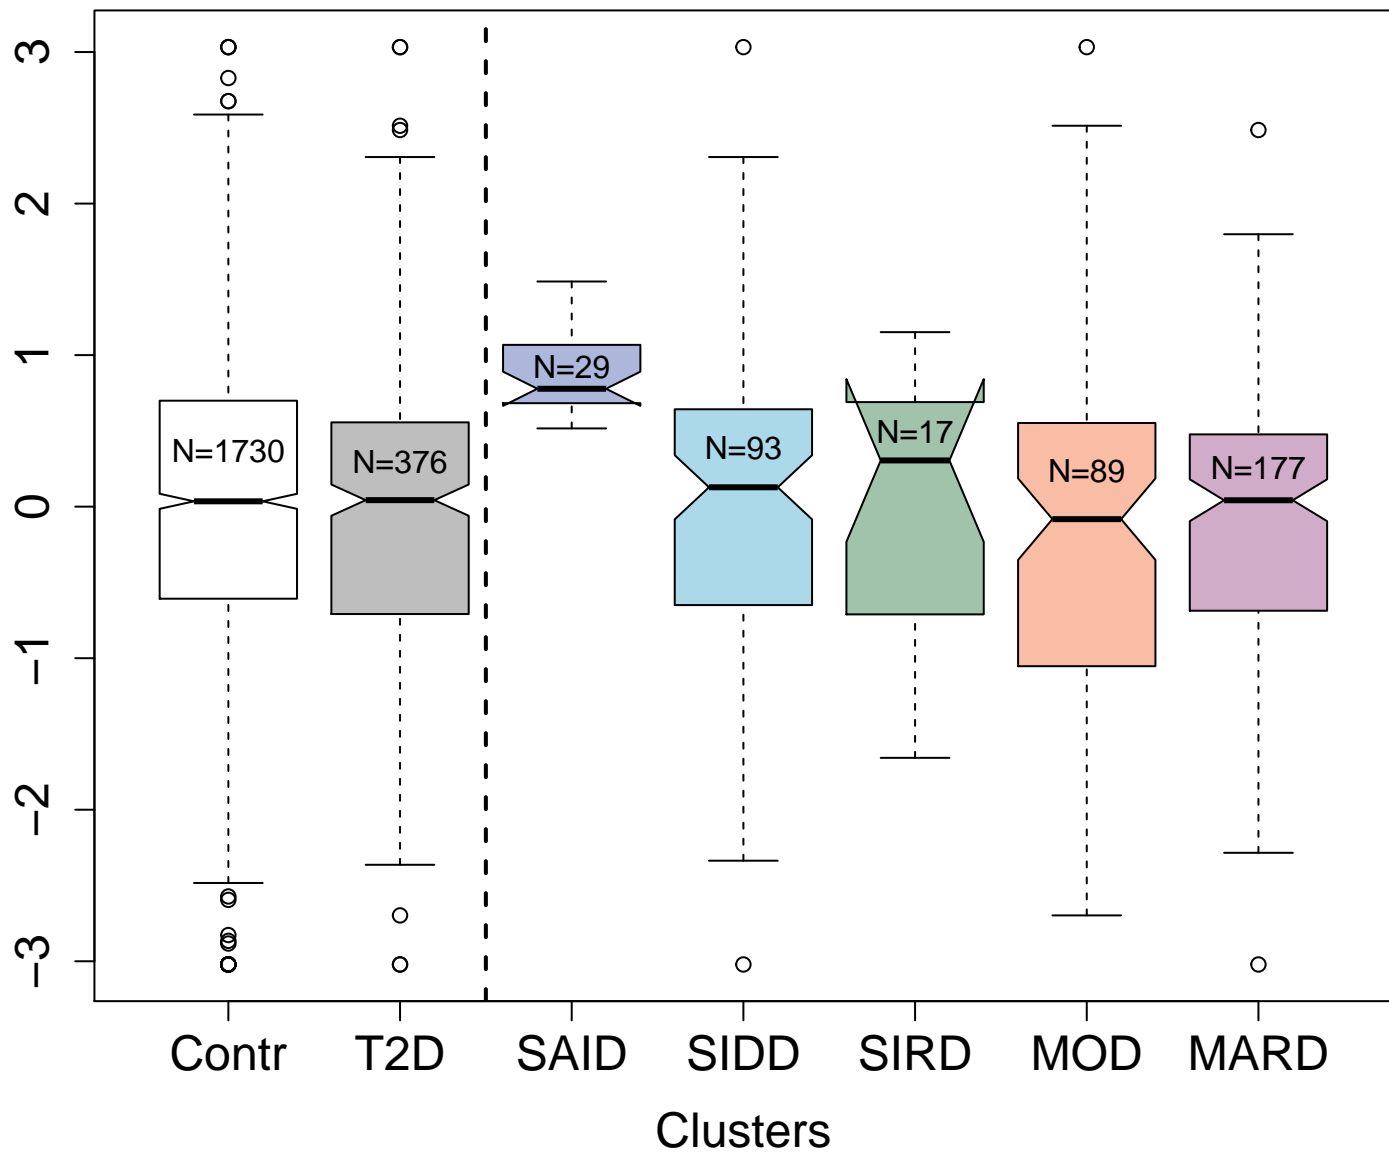

M46701 : X - 19141

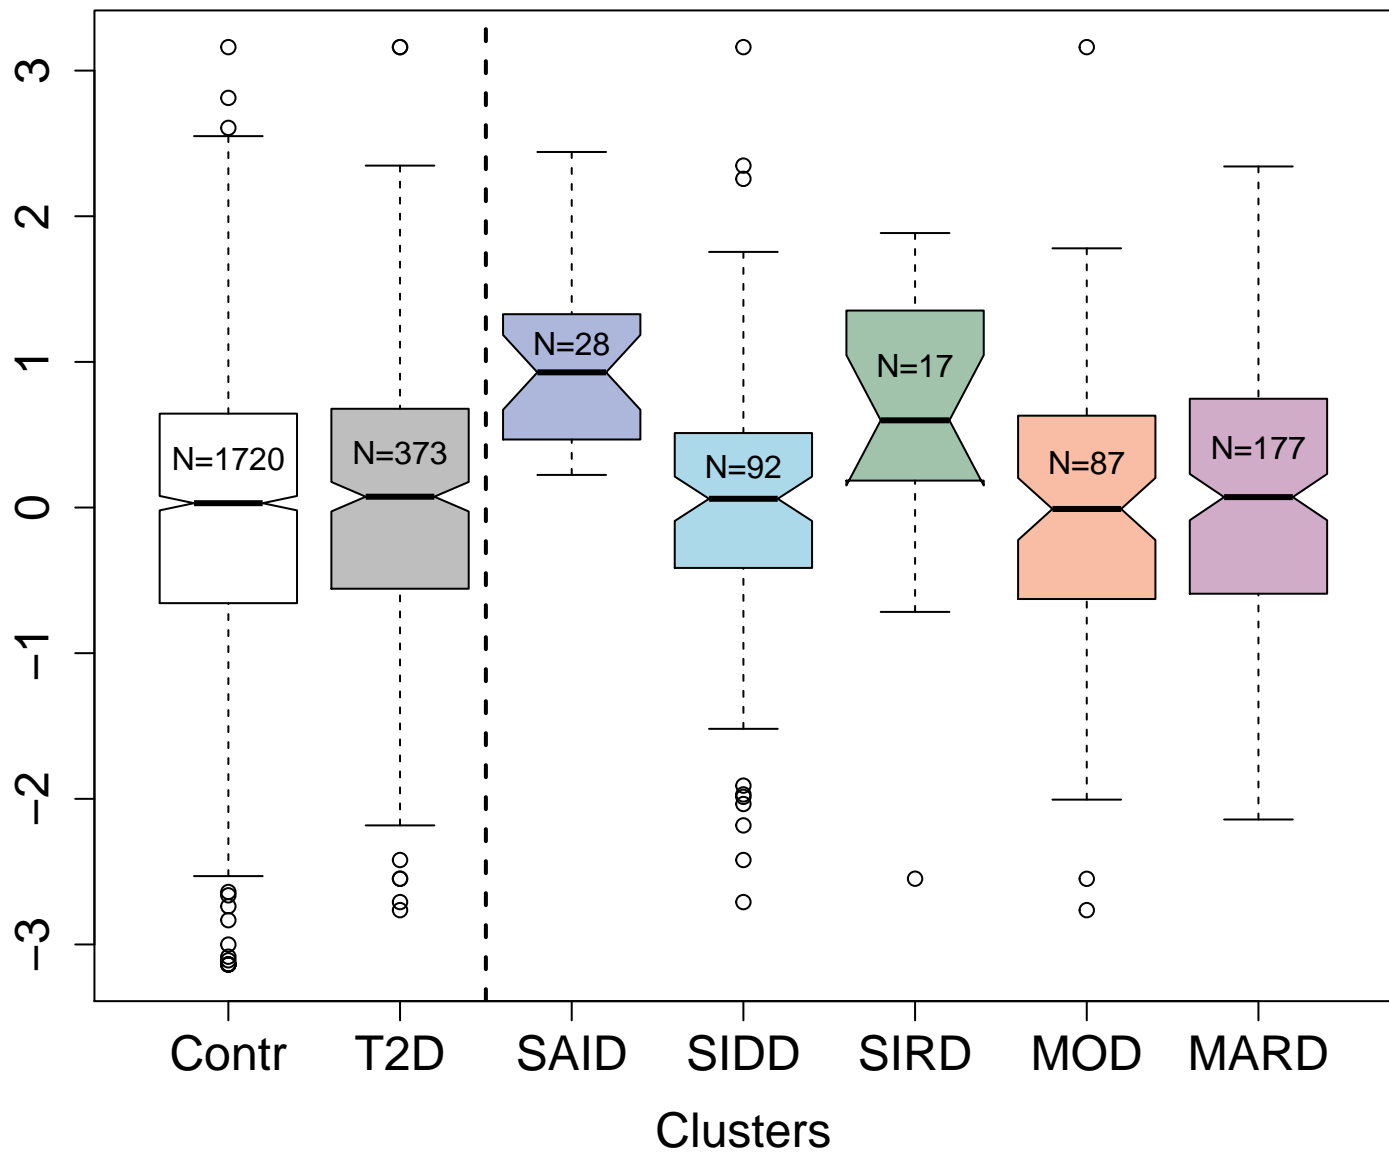

M61700 : 2-hydroxyarachidate\*

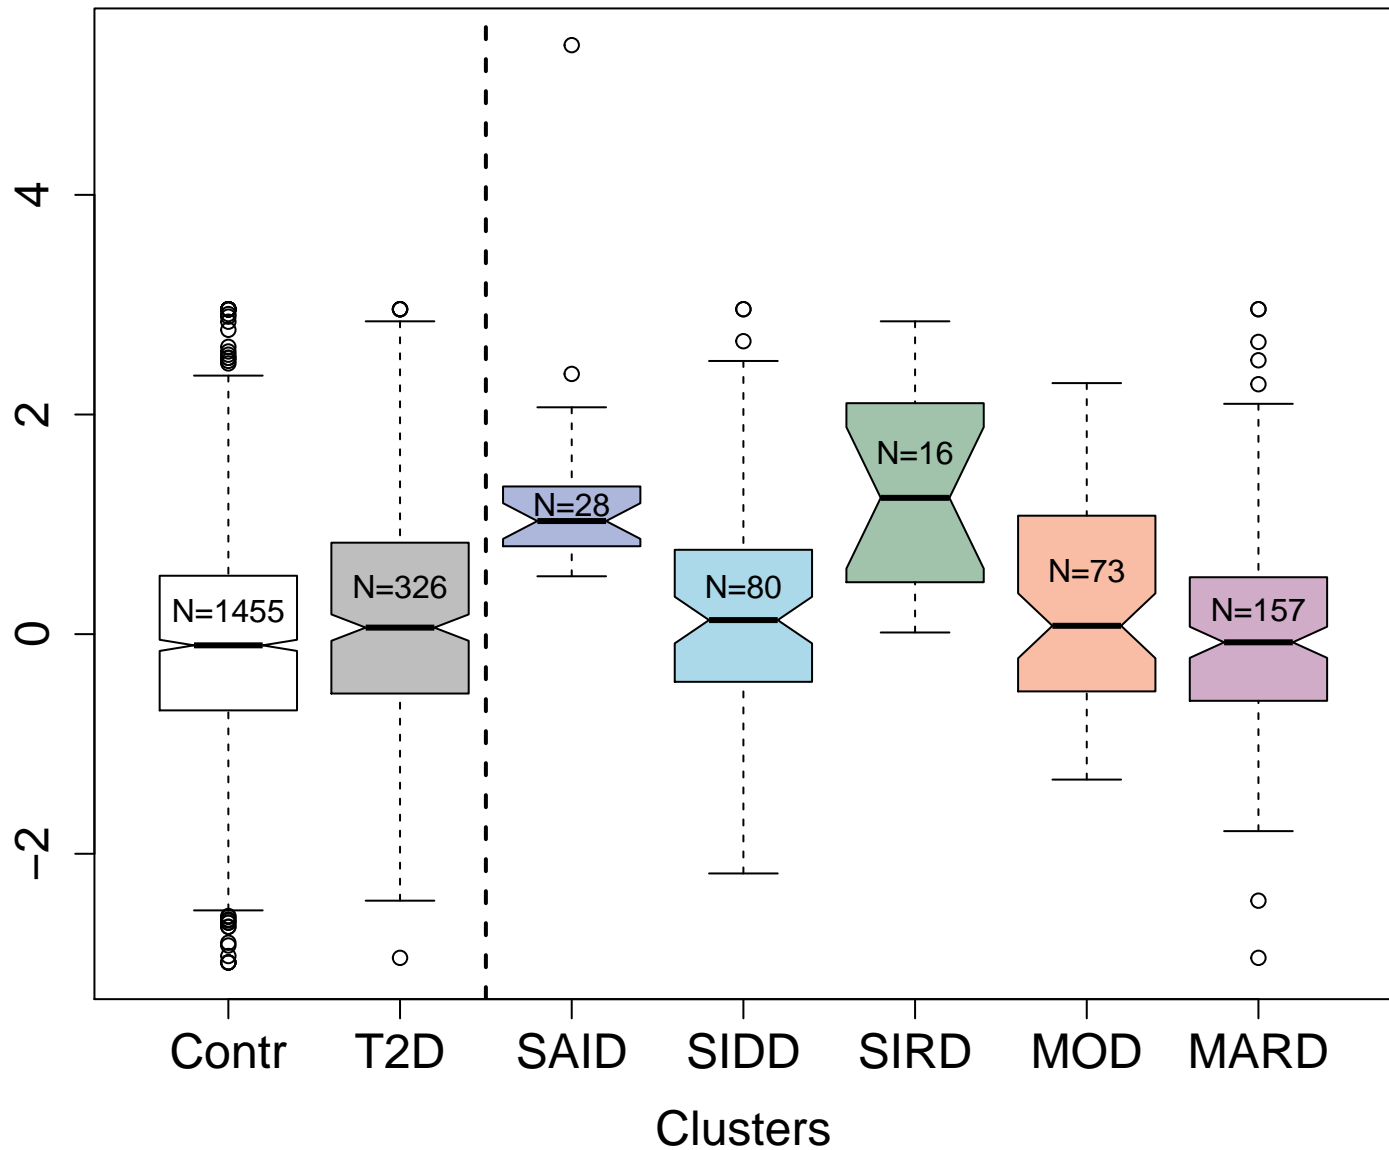

M46594 : X - 11372

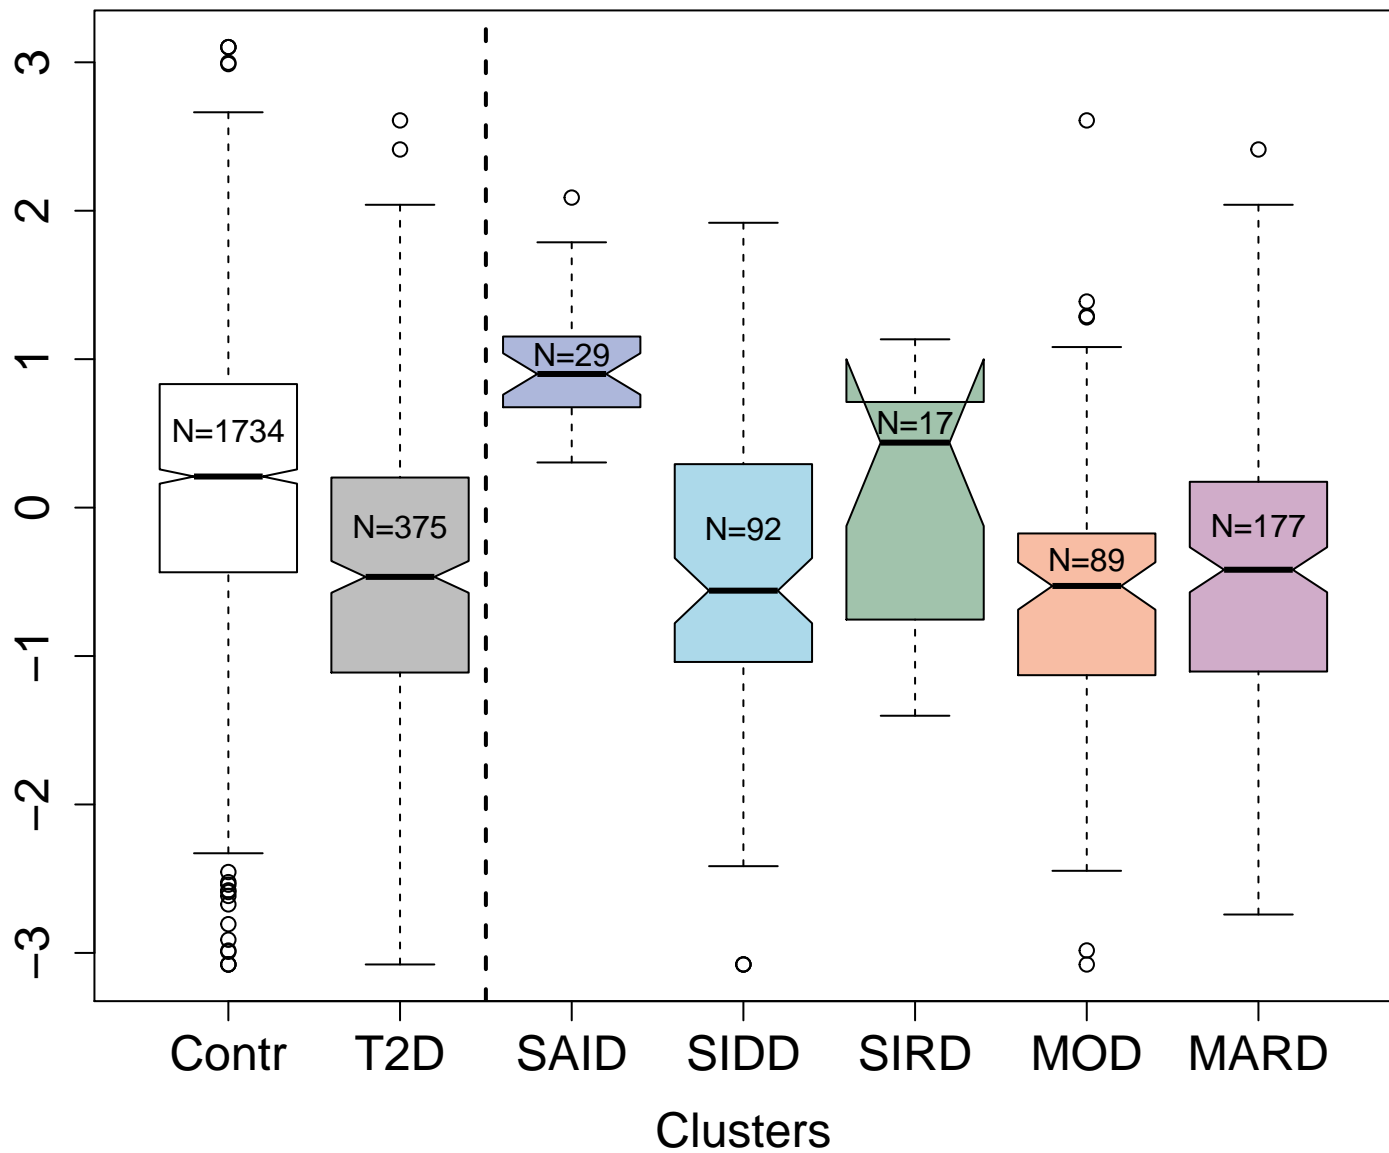

M1561 : alpha-tocopherol

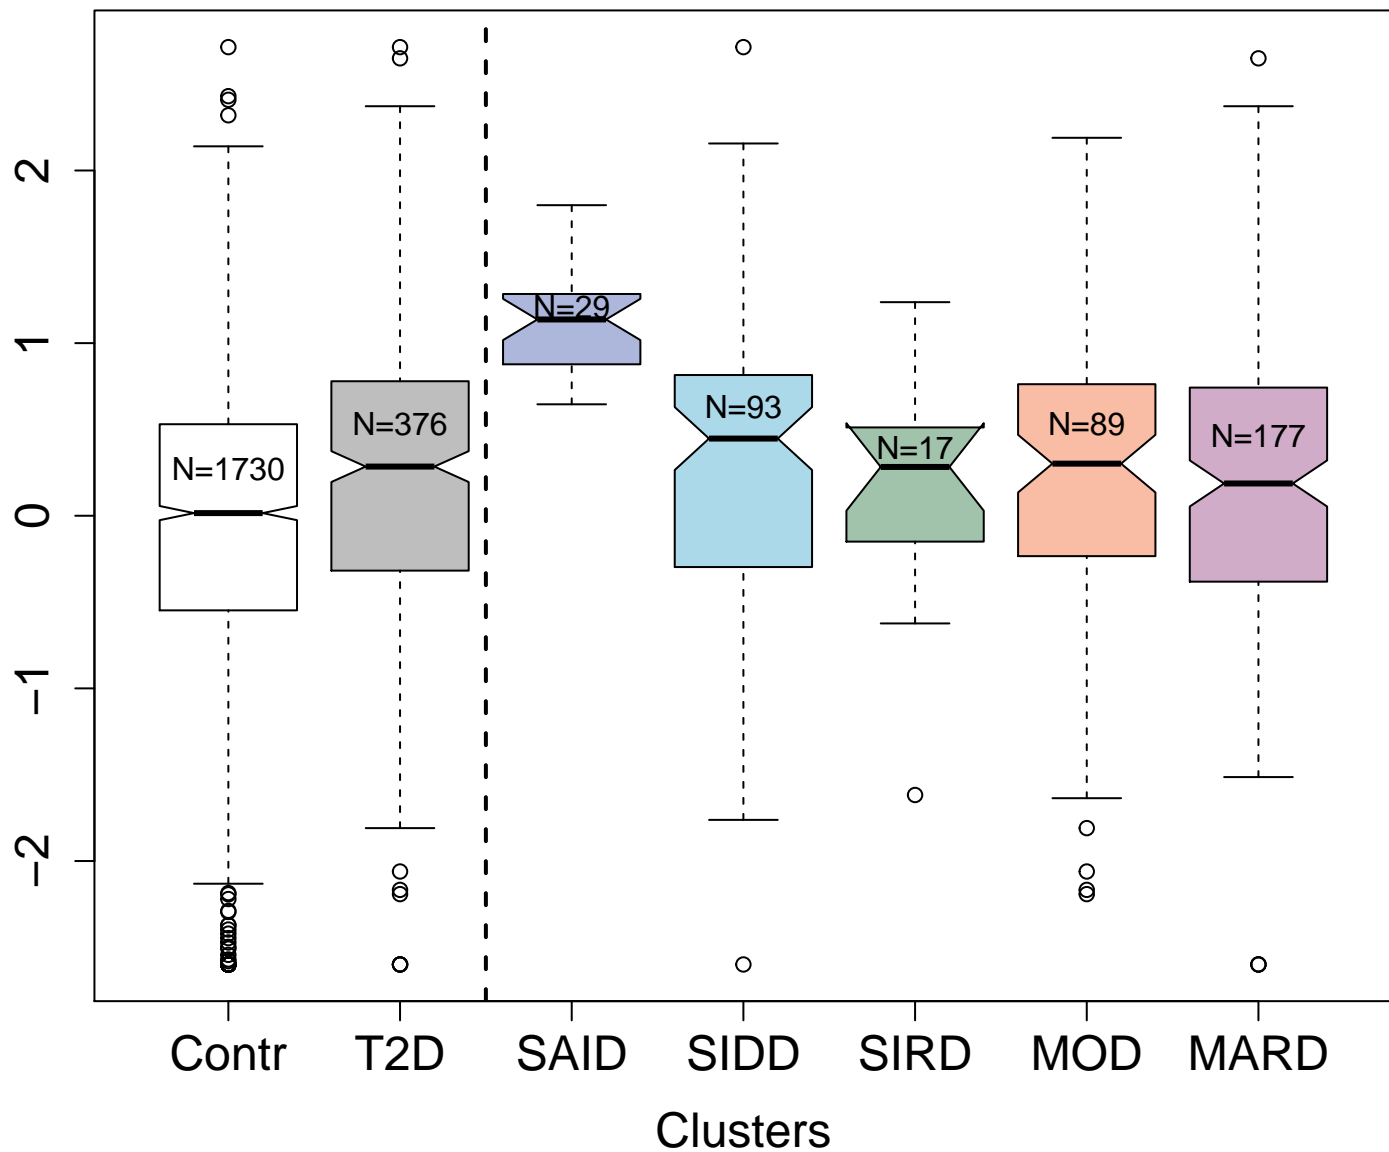

M46596 : X - 11407

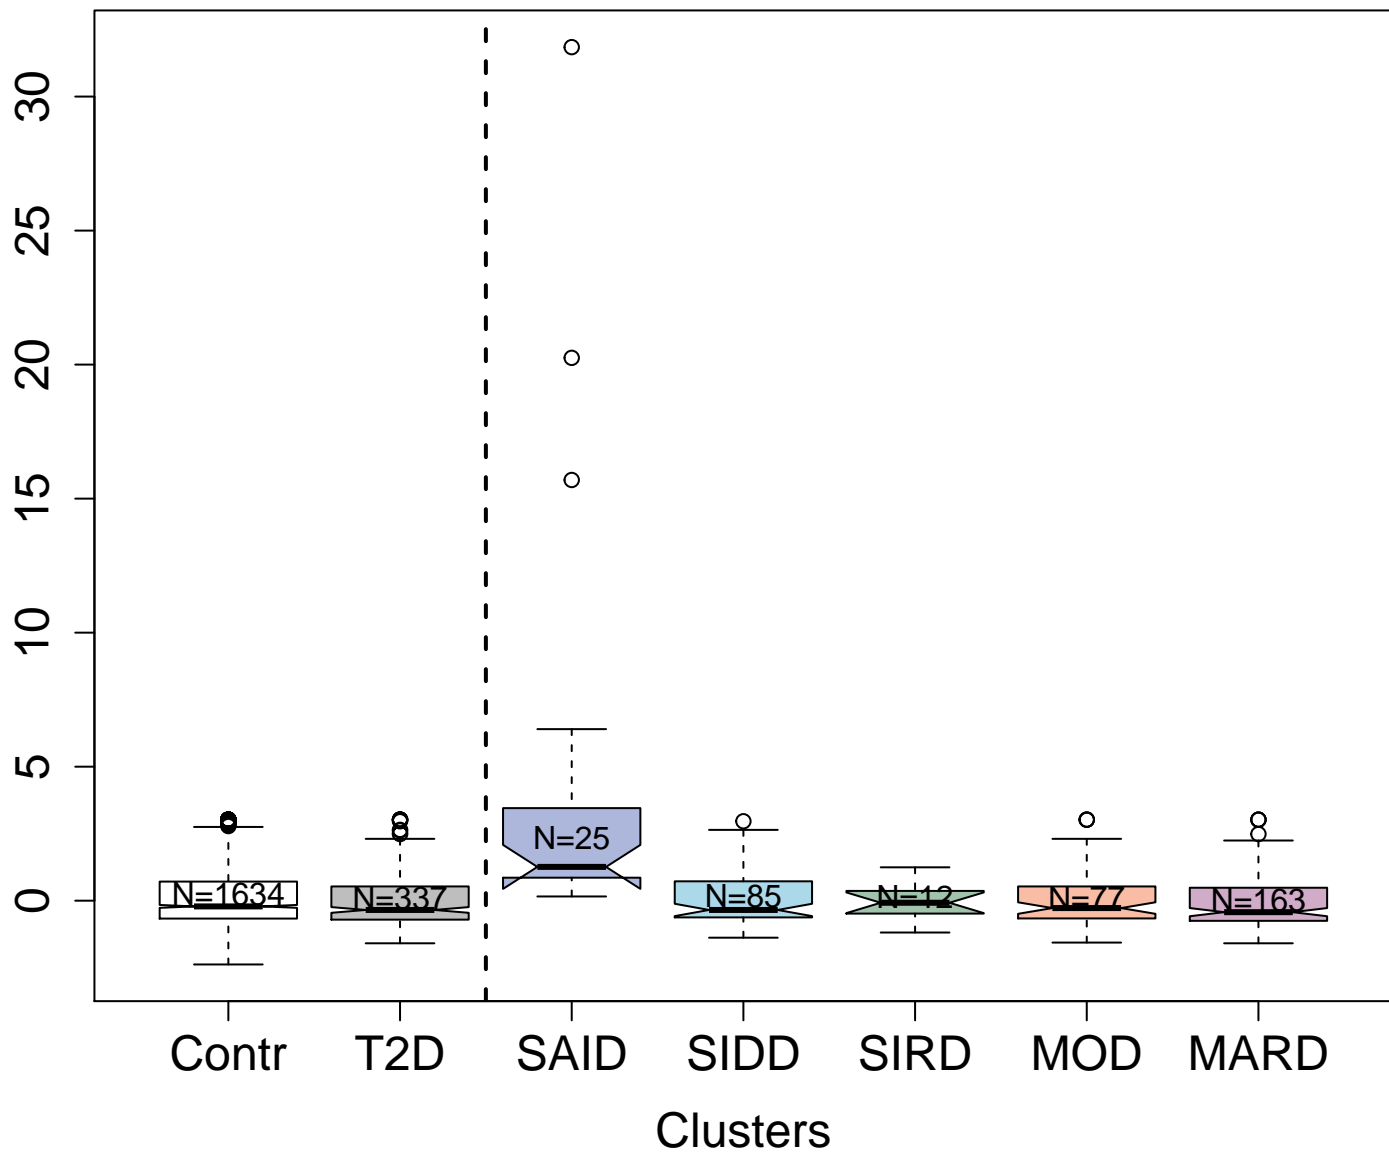



M44664 : glutaryl carnitine (C5-DC)

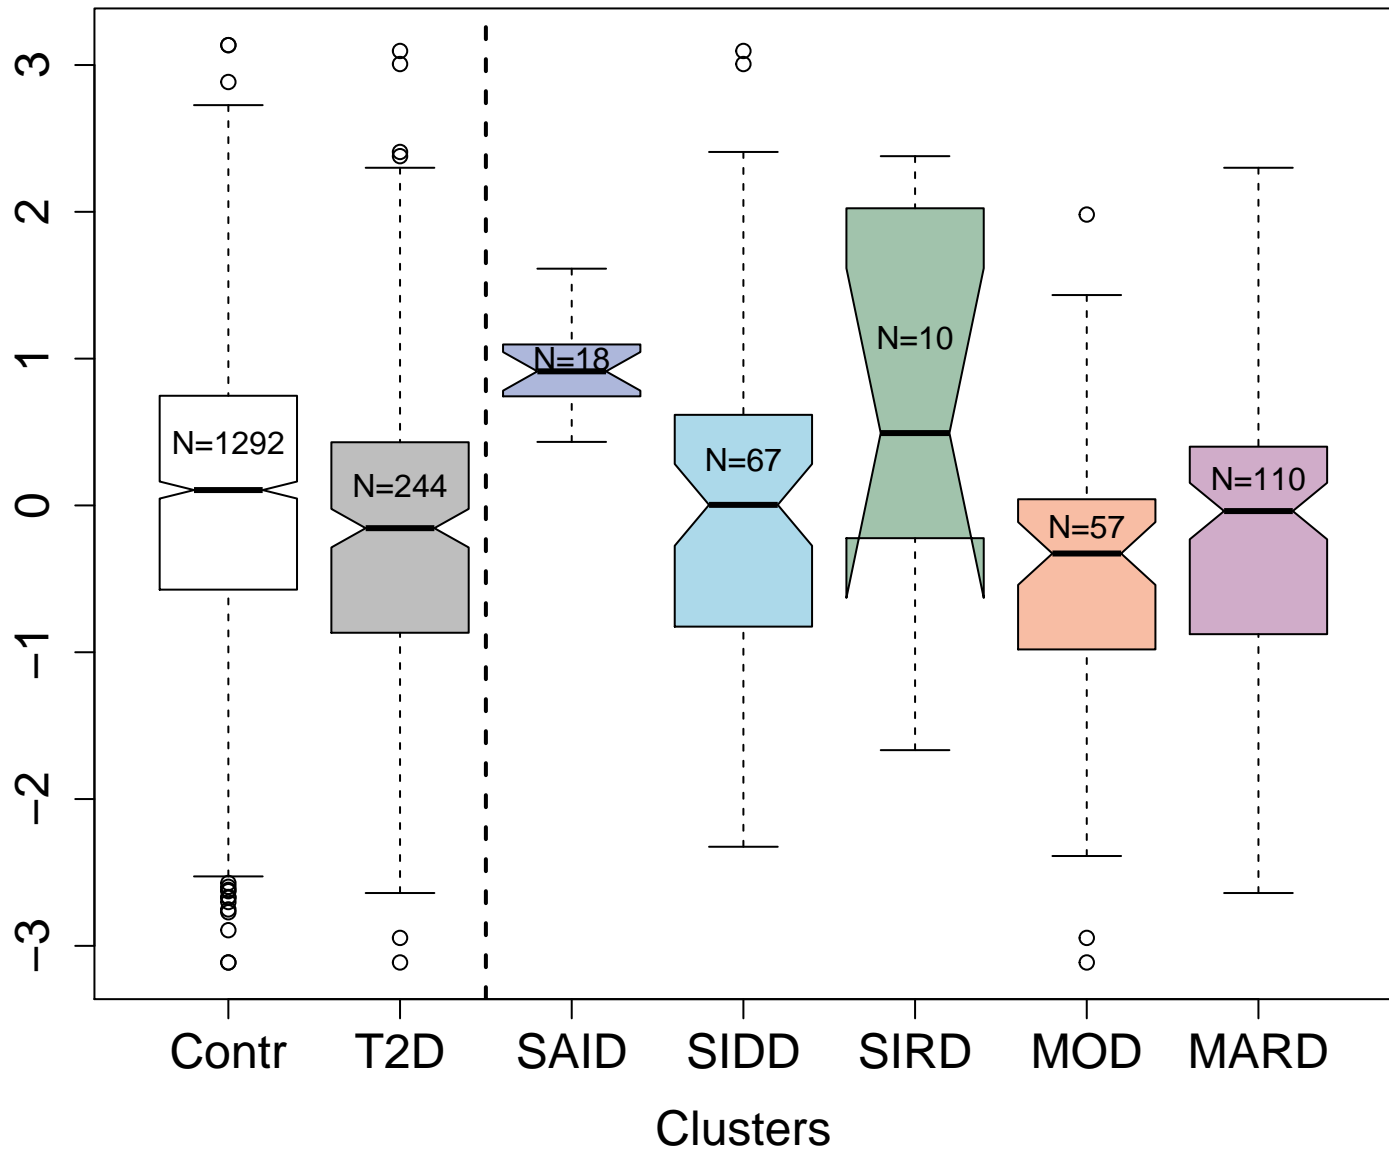

M57564 : perfluorooctanesulfonate (PFOS)

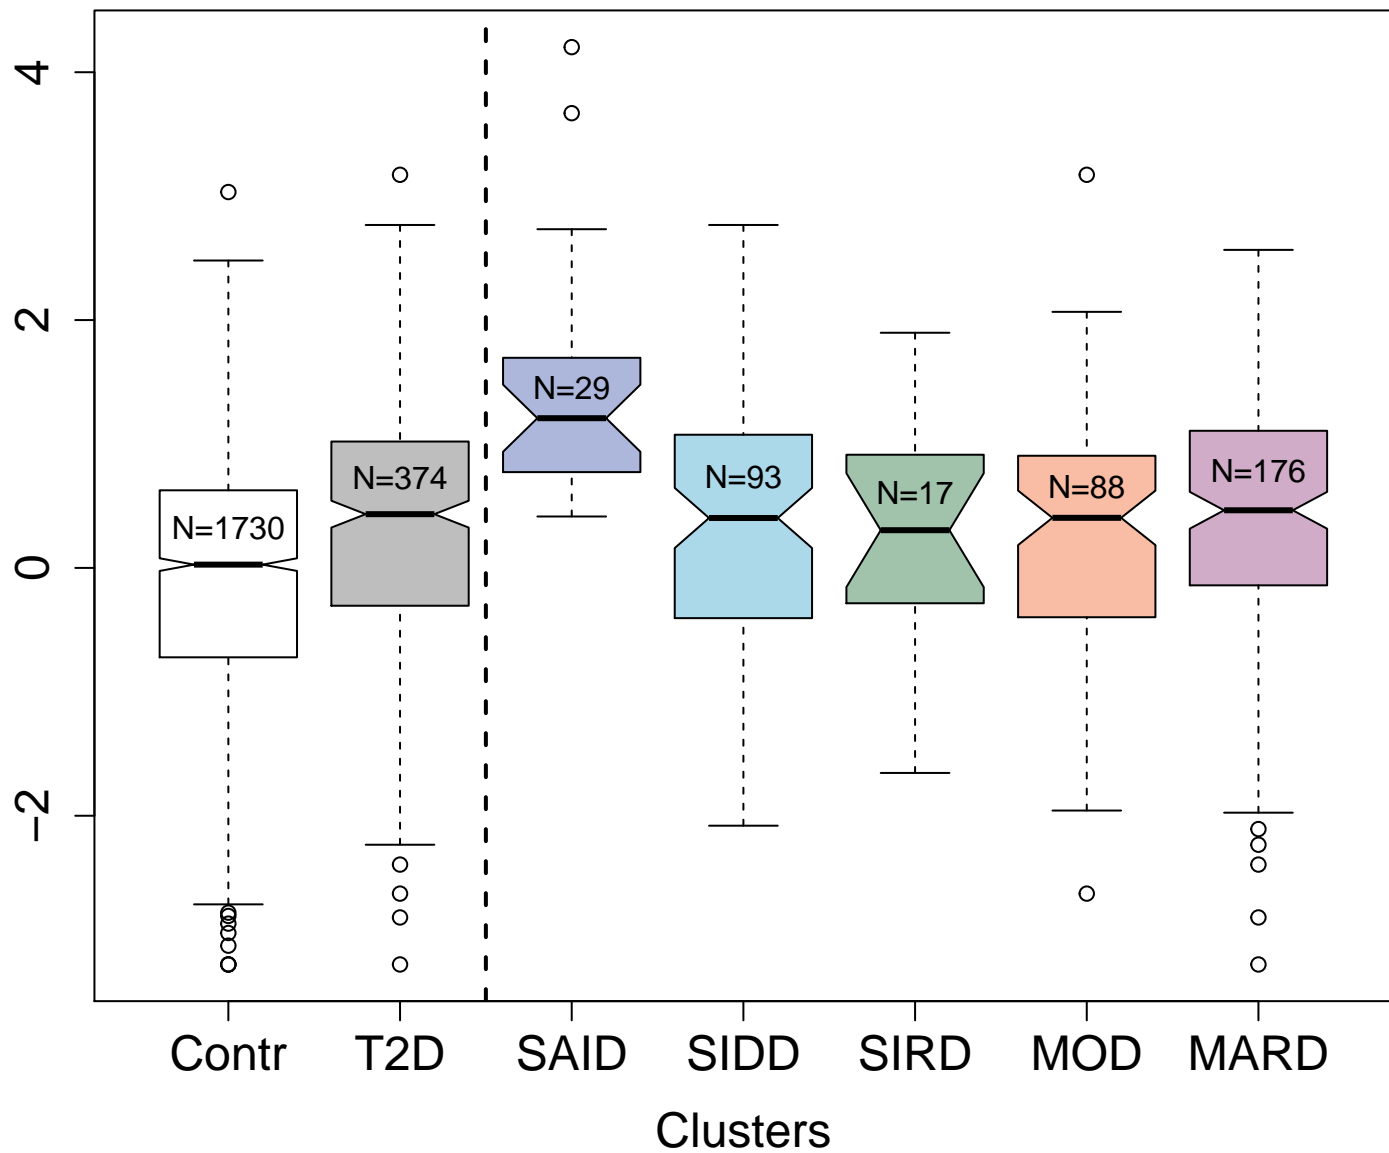

M47664 : X - 13658

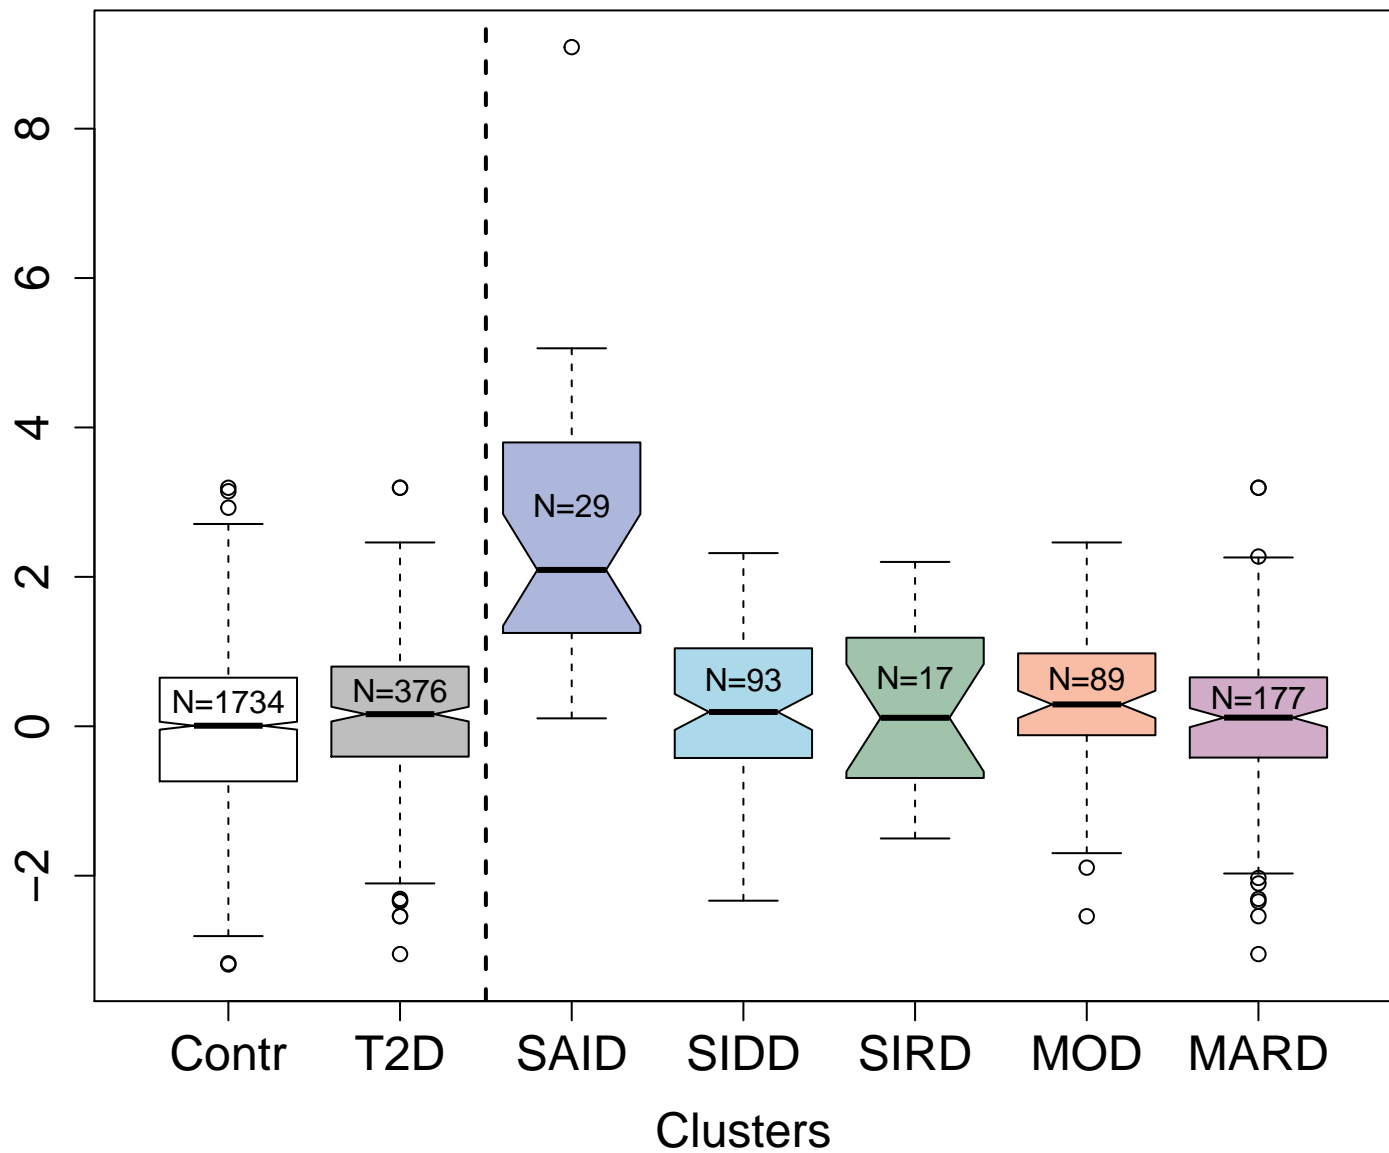



M33230 : 1-palmitoleyl-GPC (16:1)\*

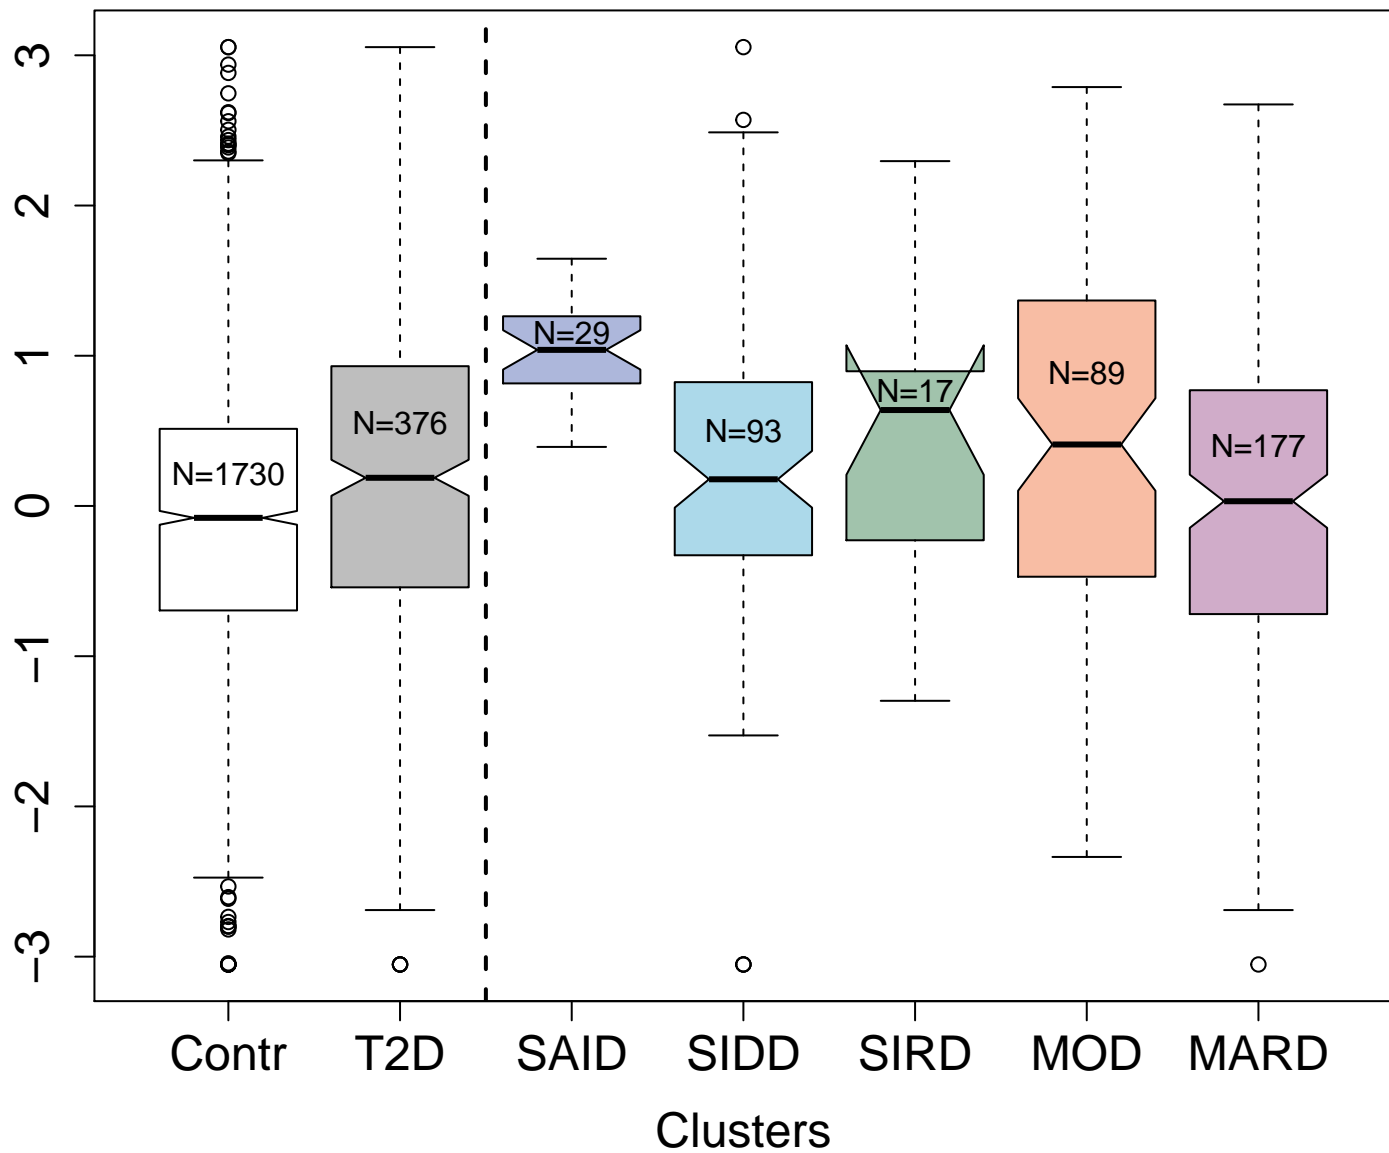

M47967 : X - 13726

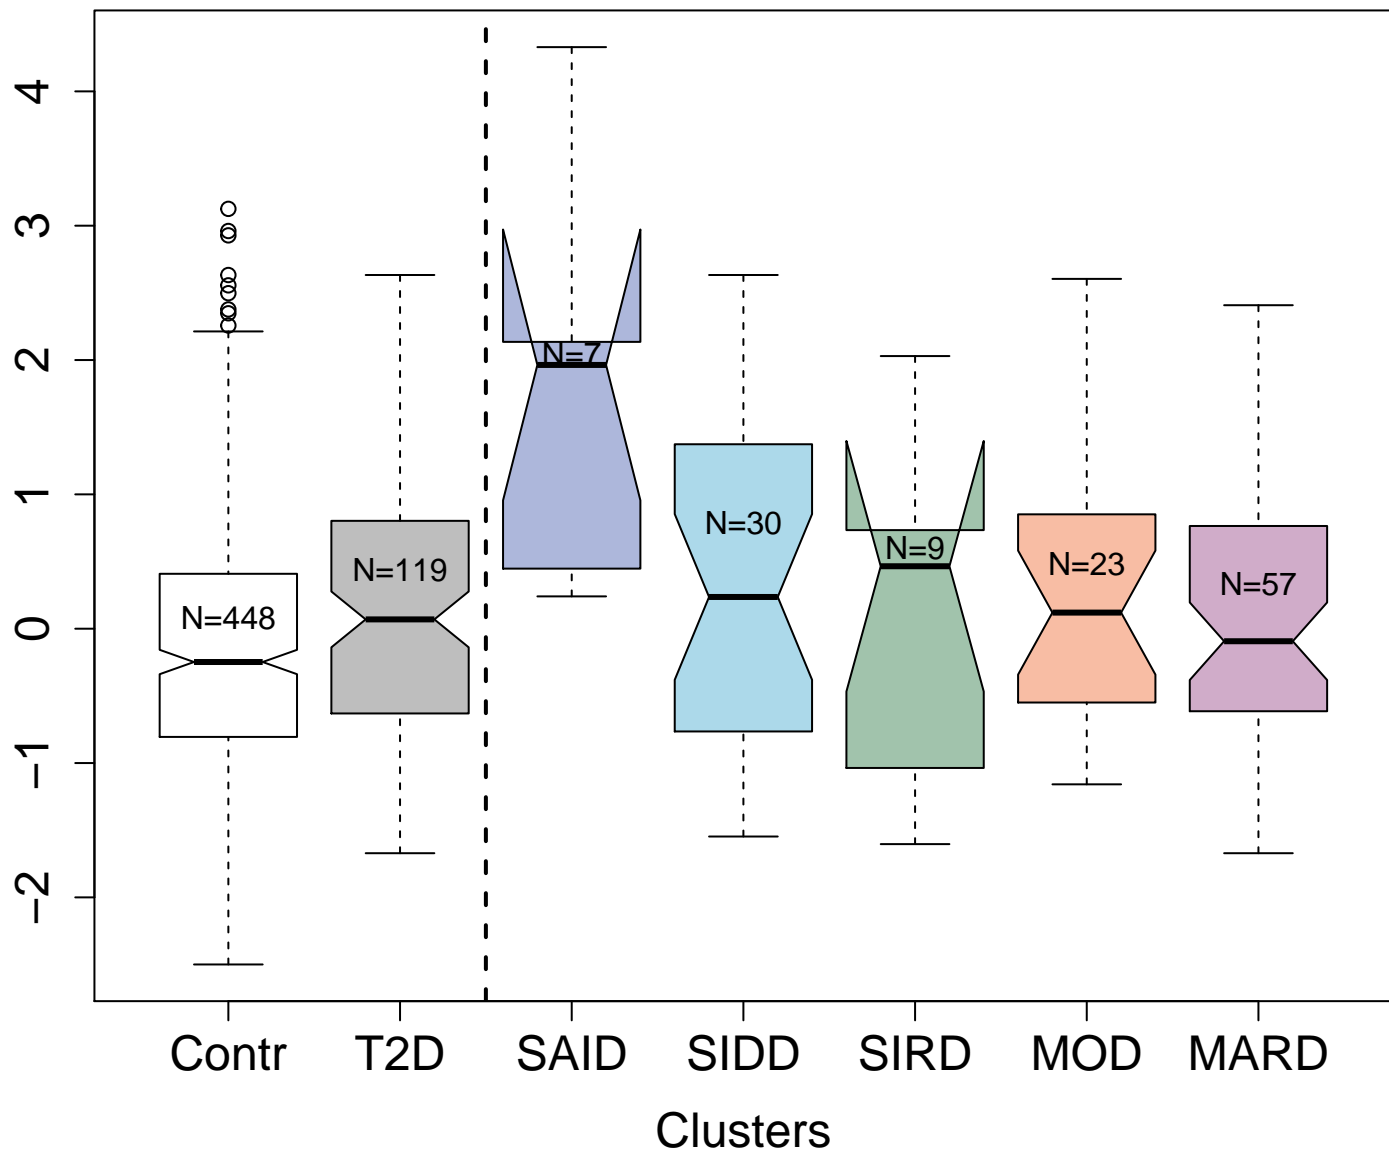

M541 : 4-hydroxyphenylacetate

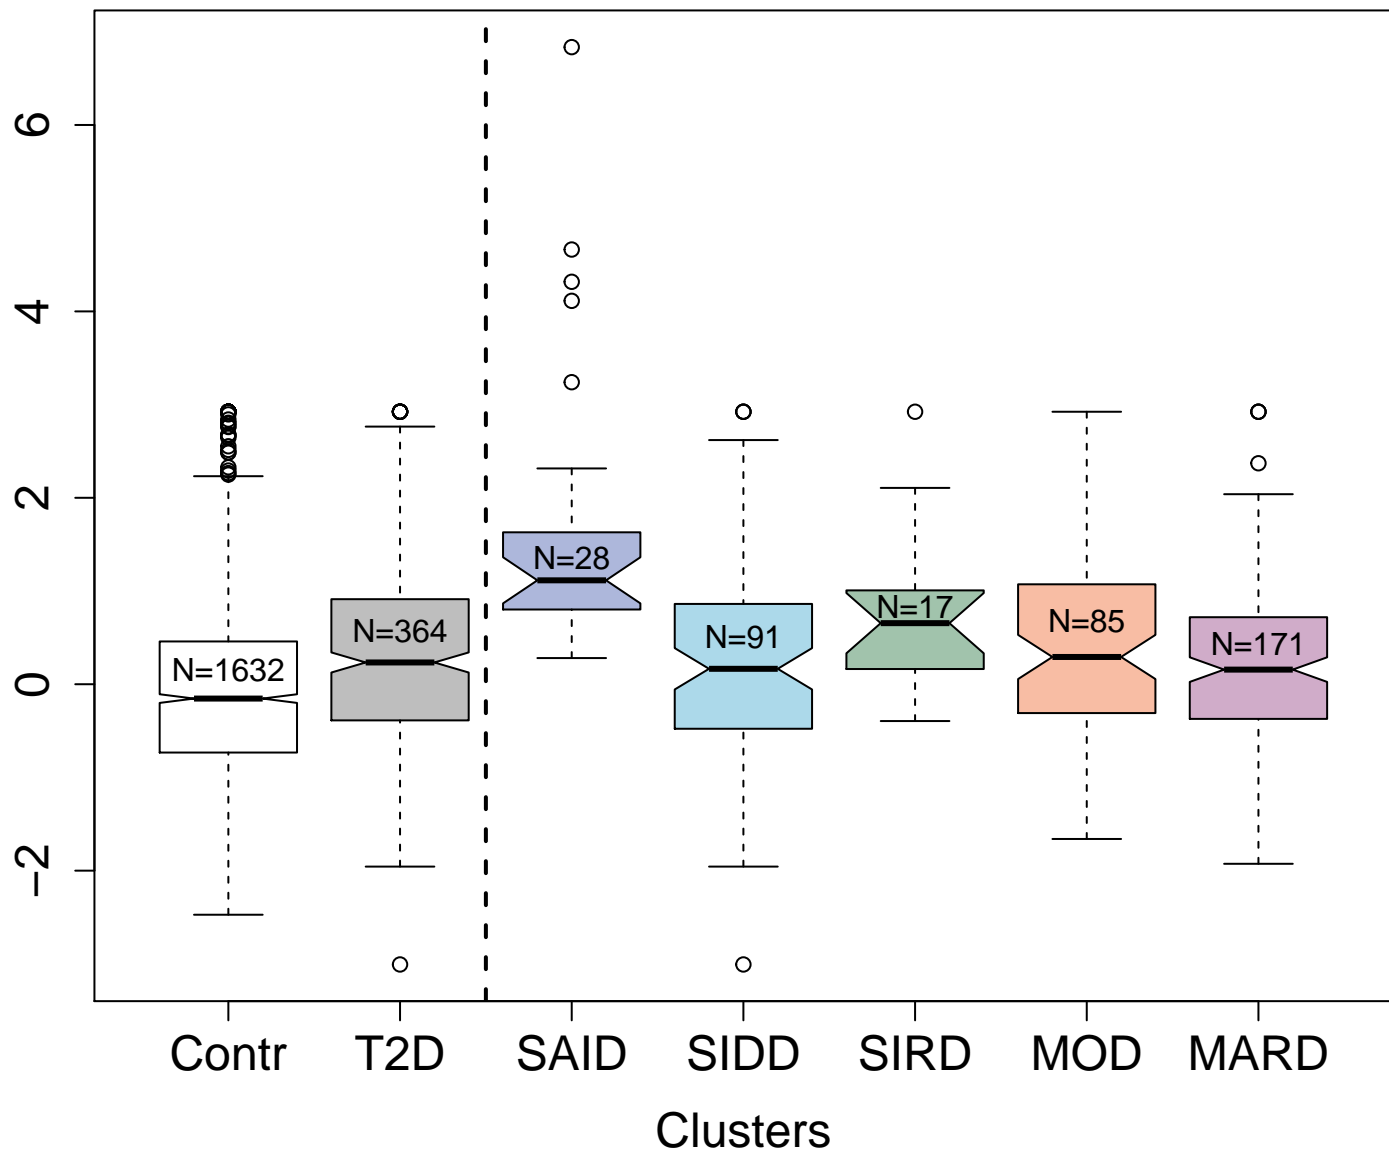

M62955 : 8-methoxykynurenate

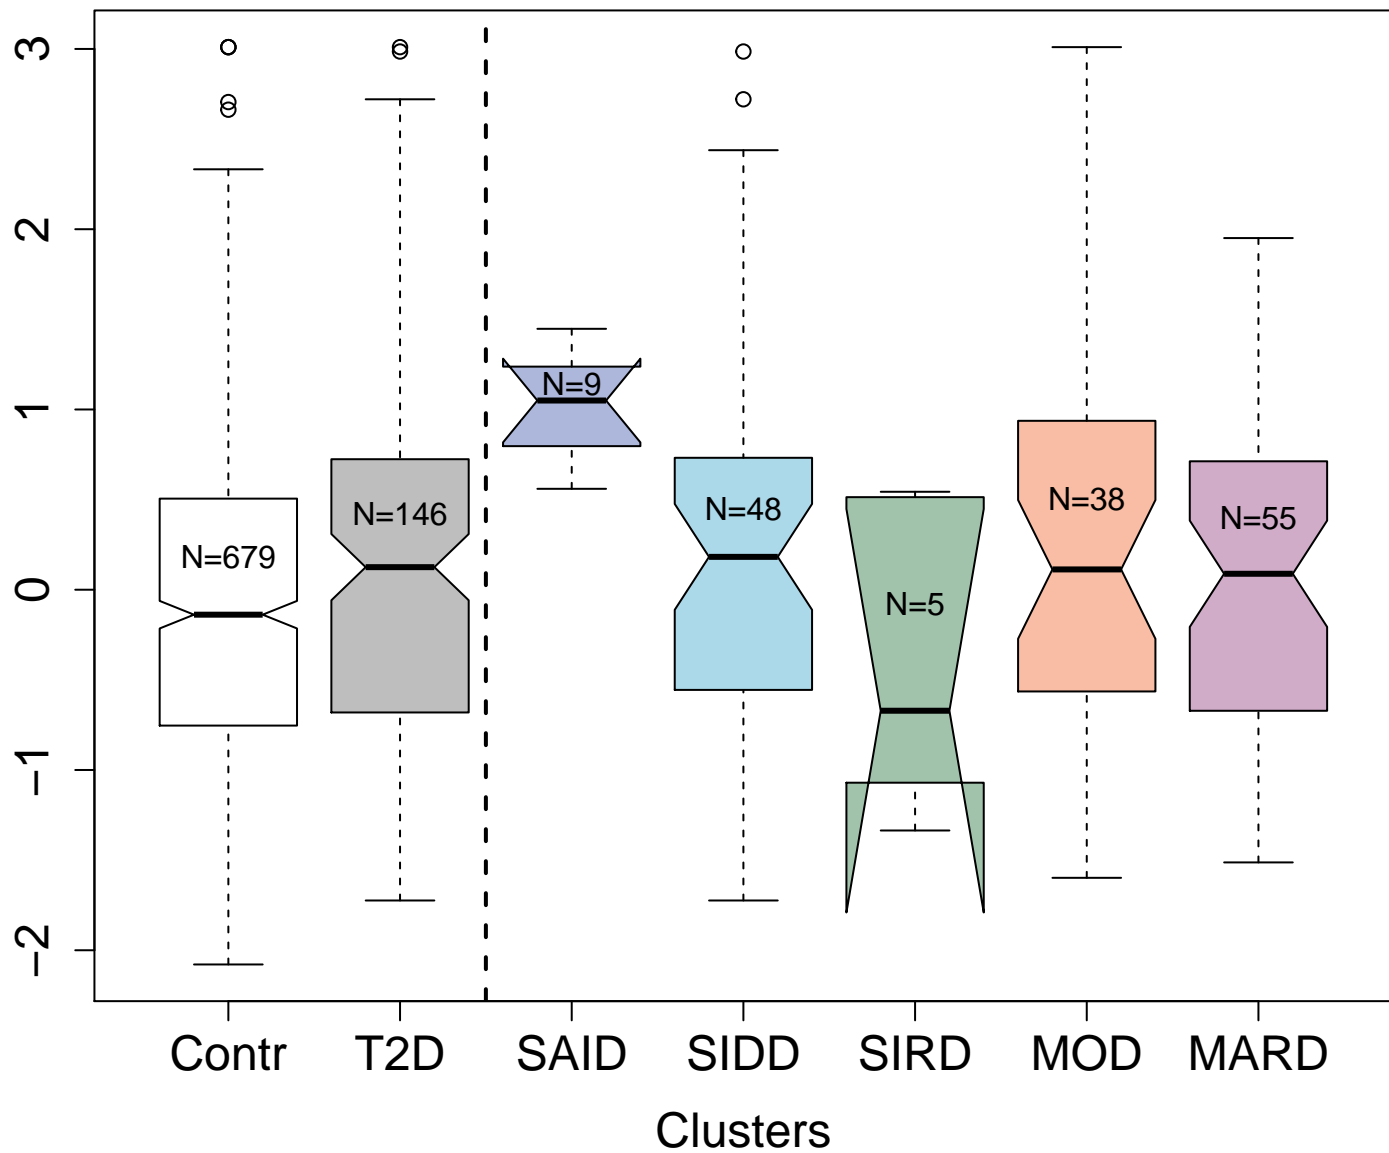



M46645 : X - 13728

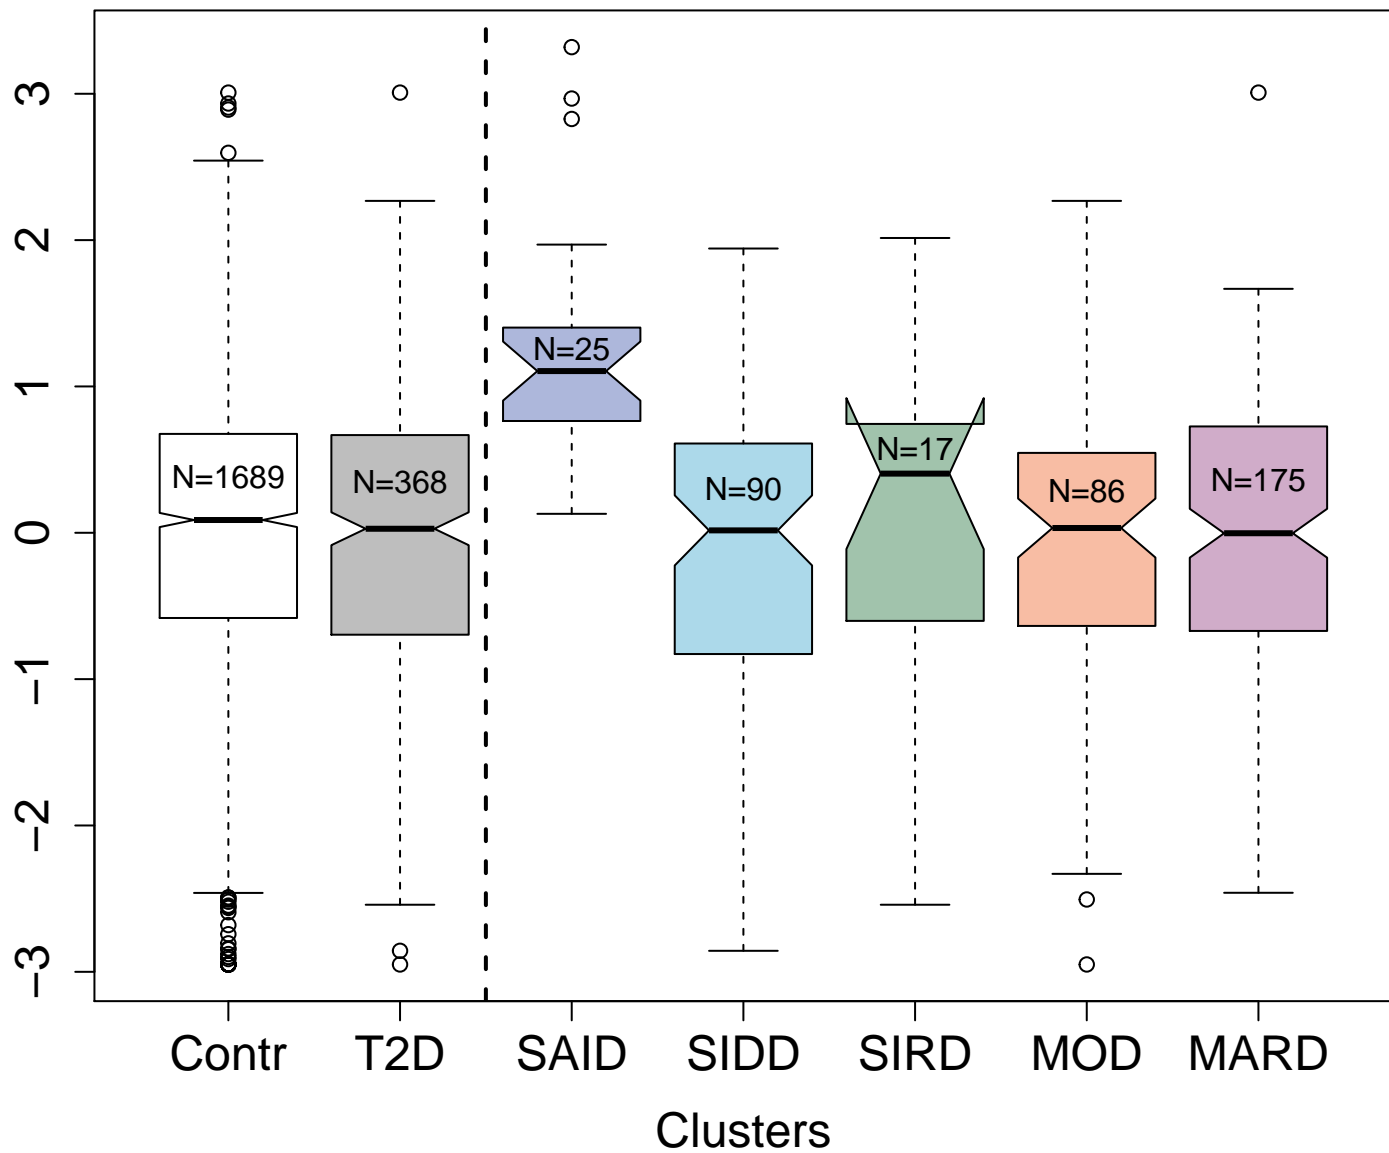

M32445 : 3-methylxanthine

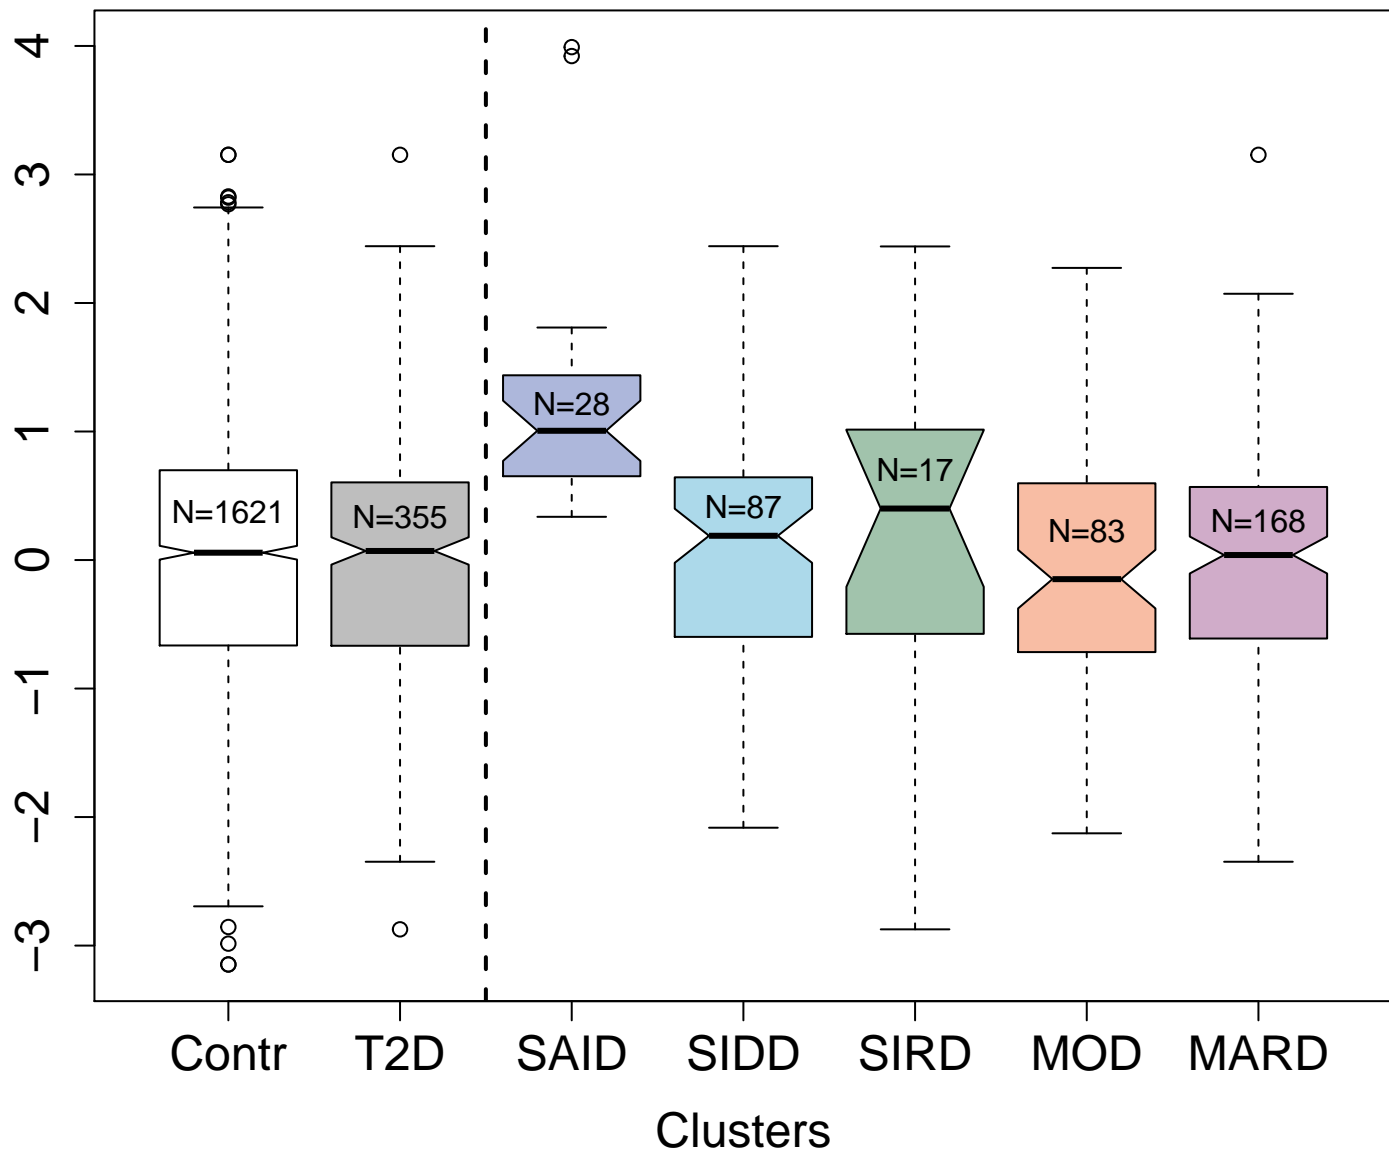

M38165 : palmitoyl ethanolamide

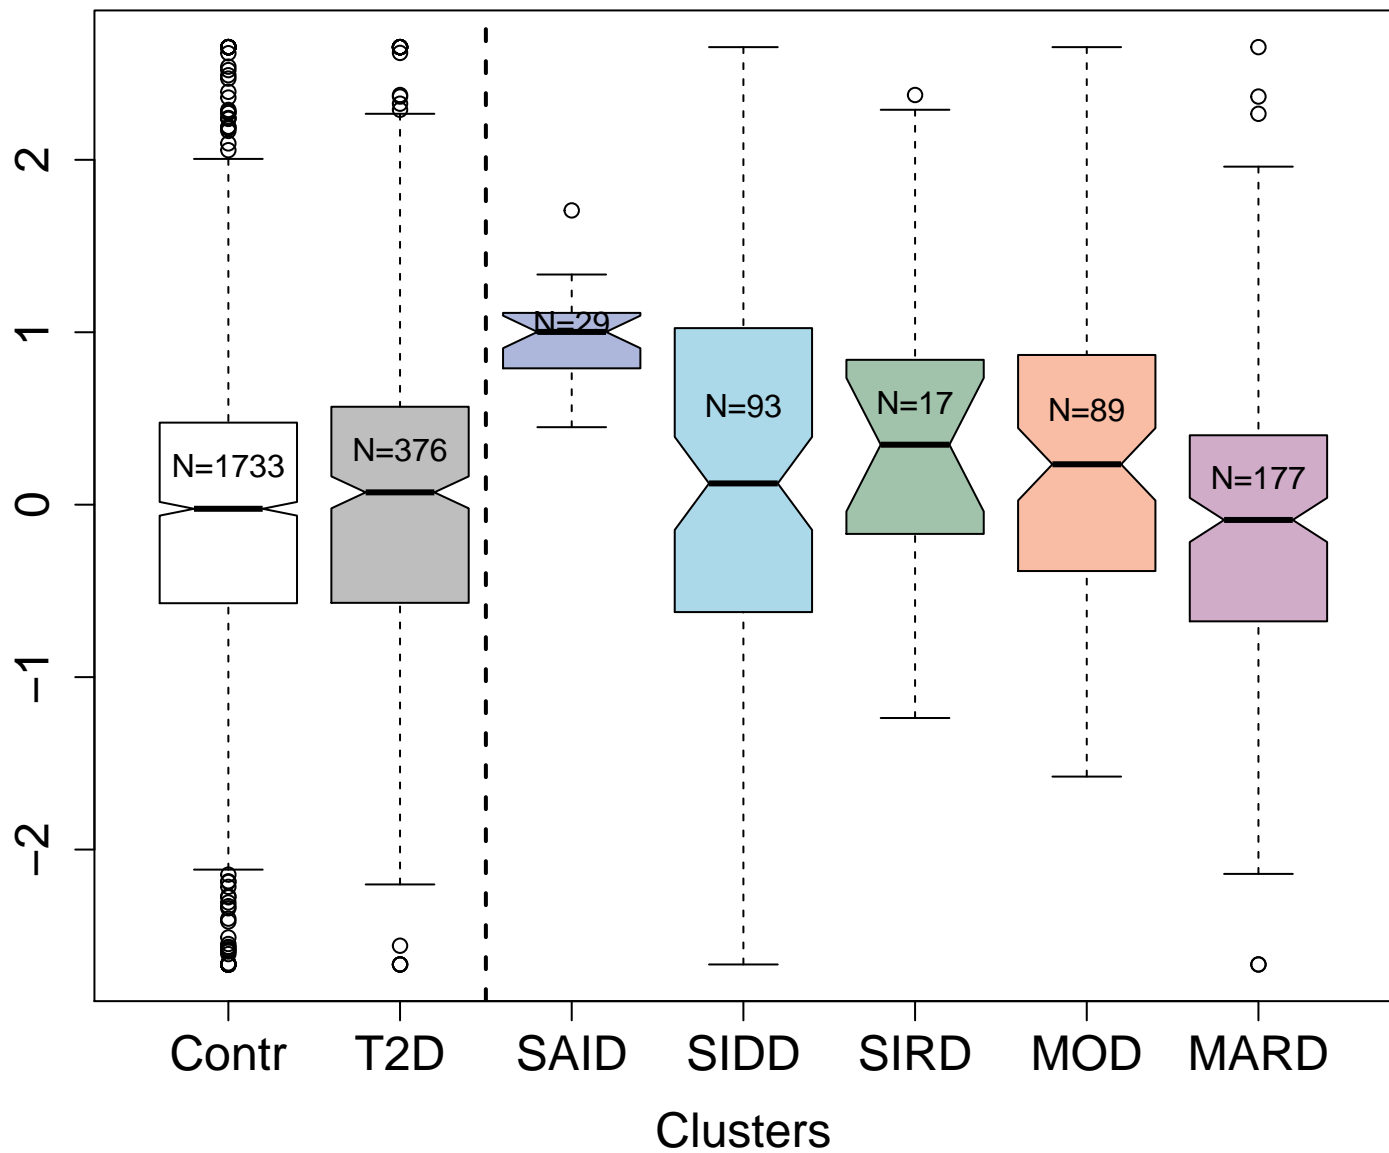

M62819 : N,N-dimethyl-5-aminovalerate

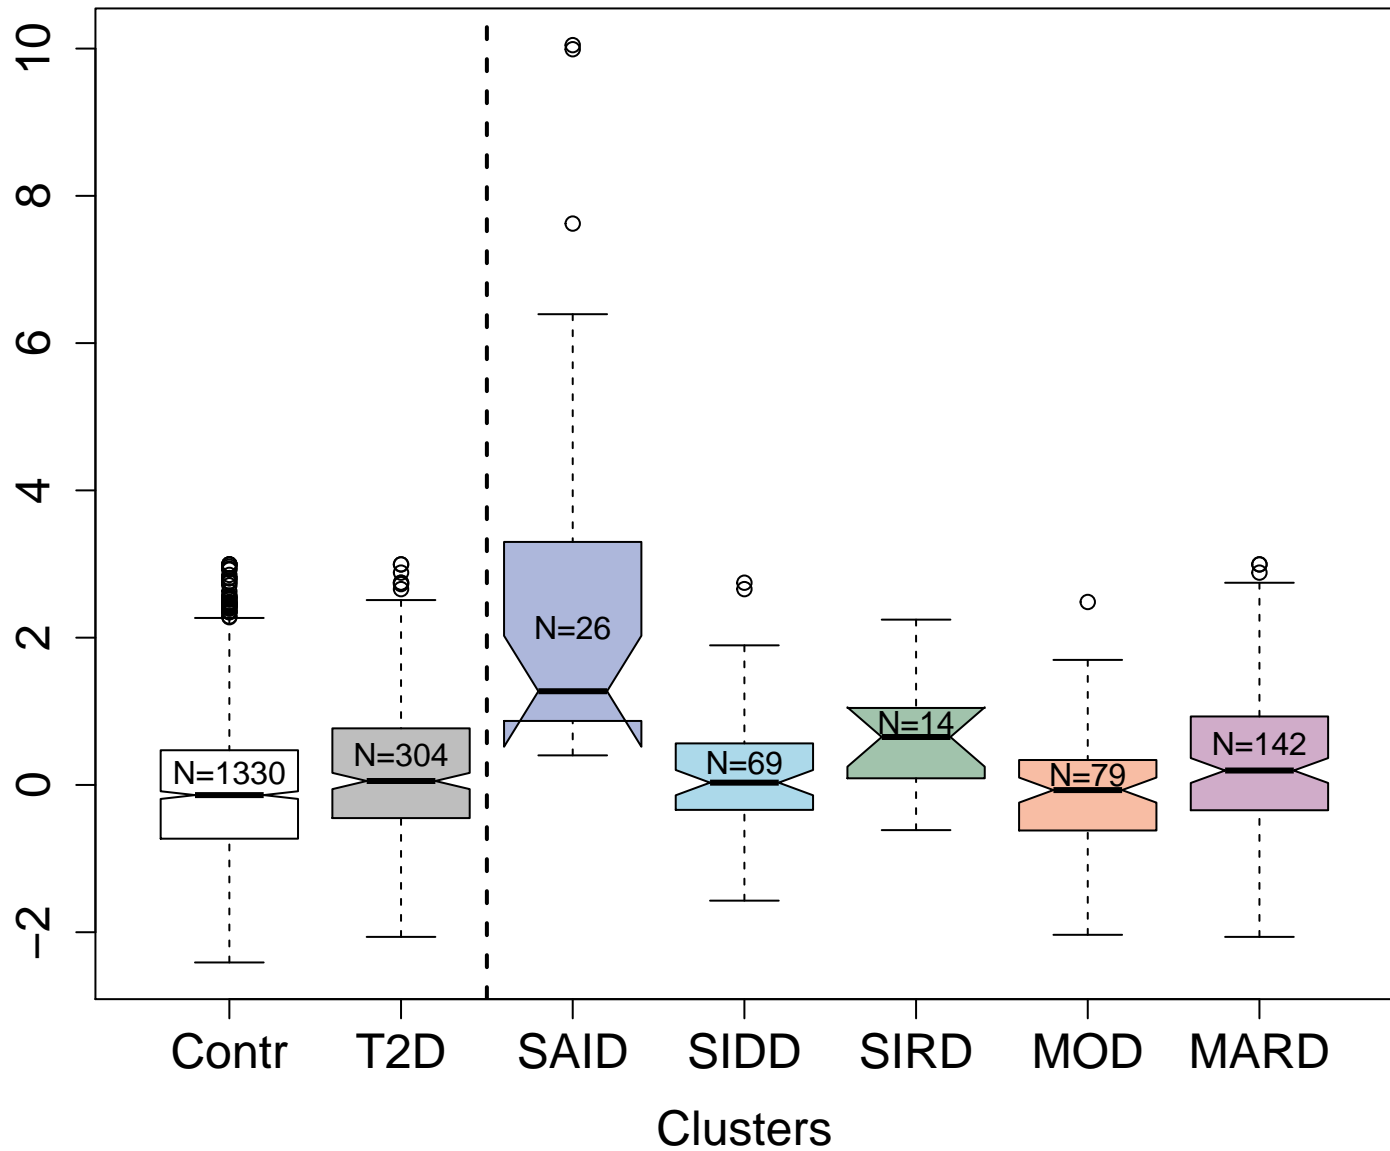

M46223 : linoleoylcarnitine (C18:2)\*

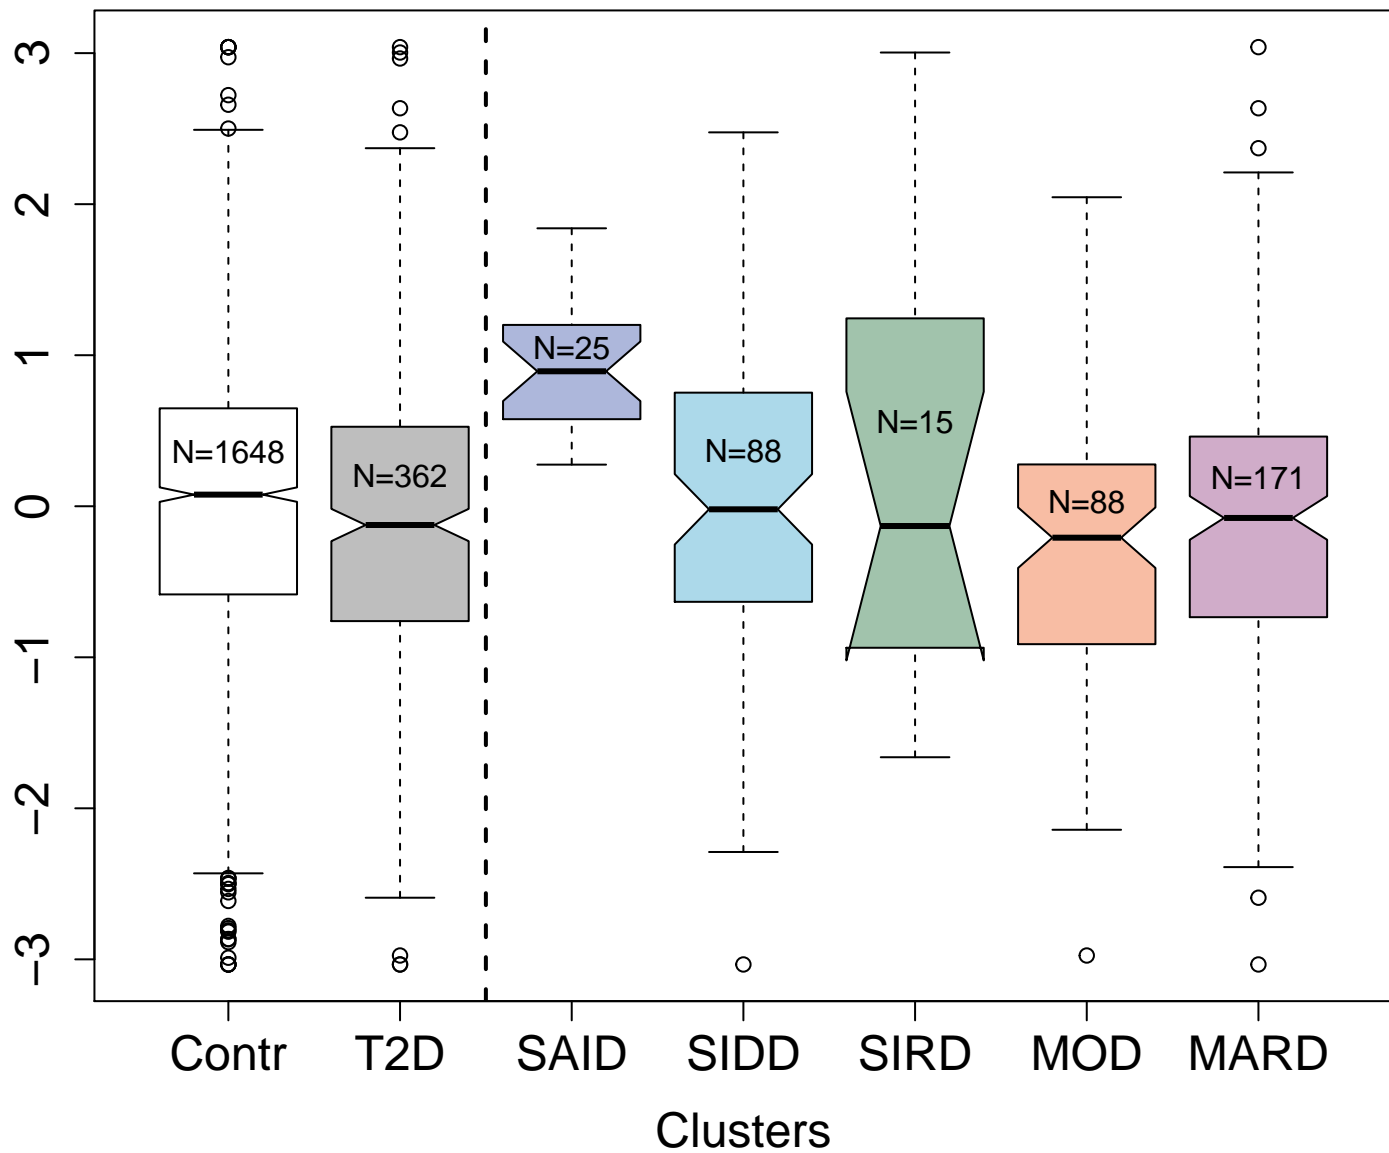

M38102 : oleoyl ethanolamide

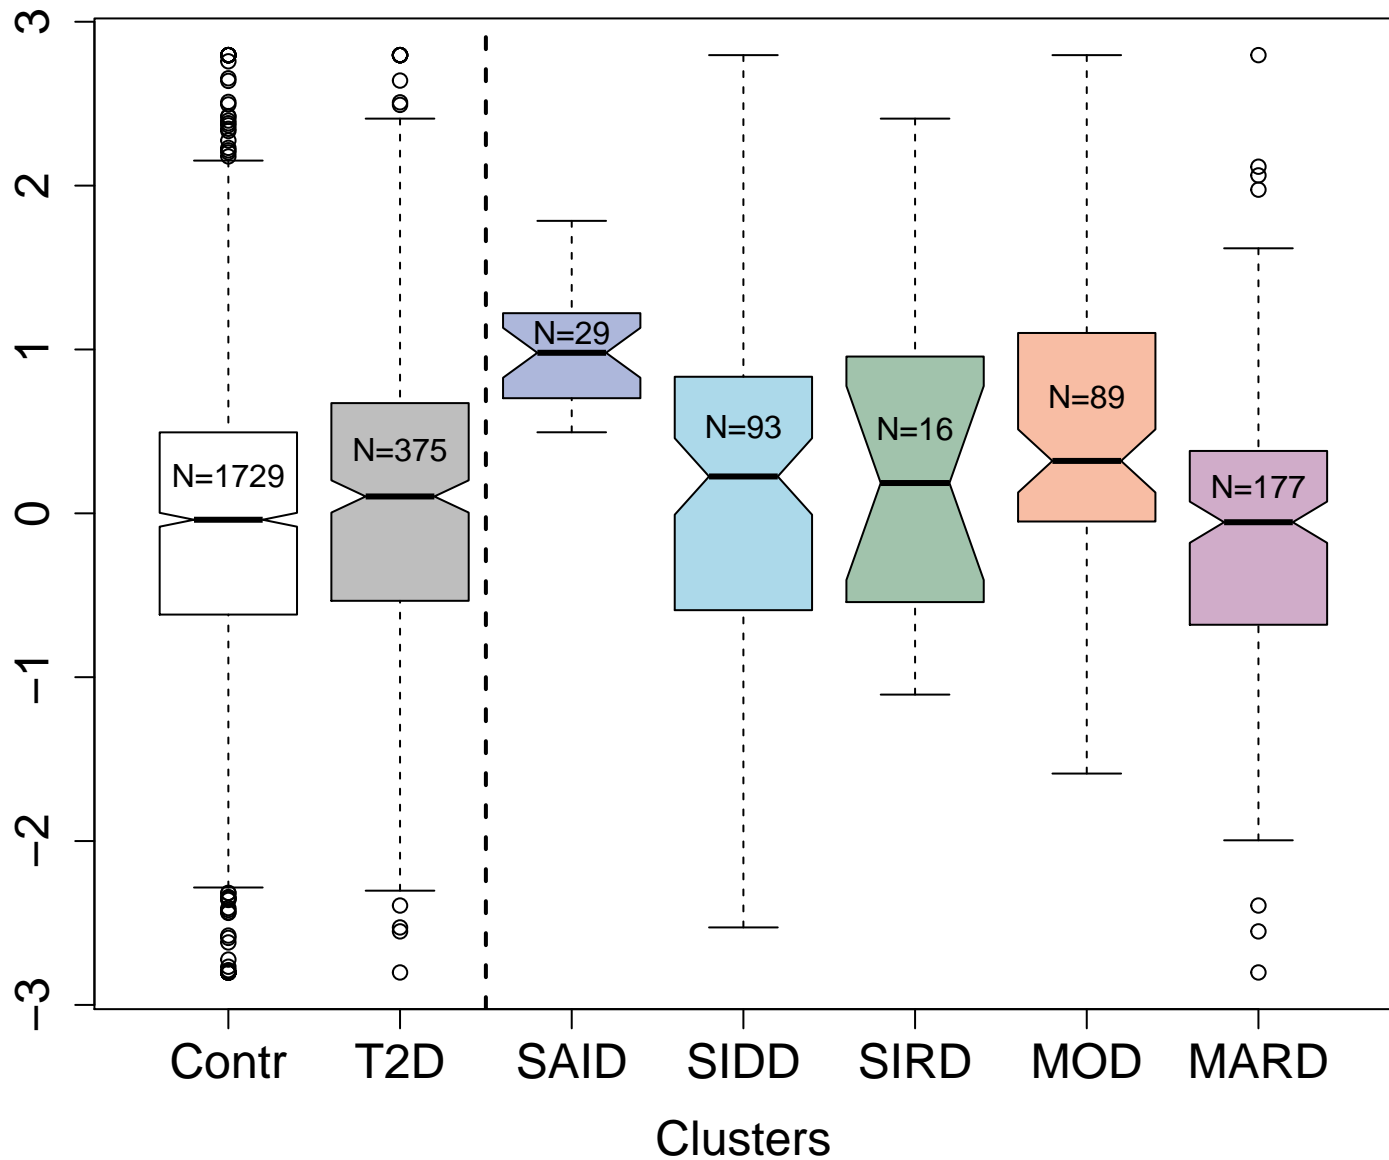

M21151 : saccharin

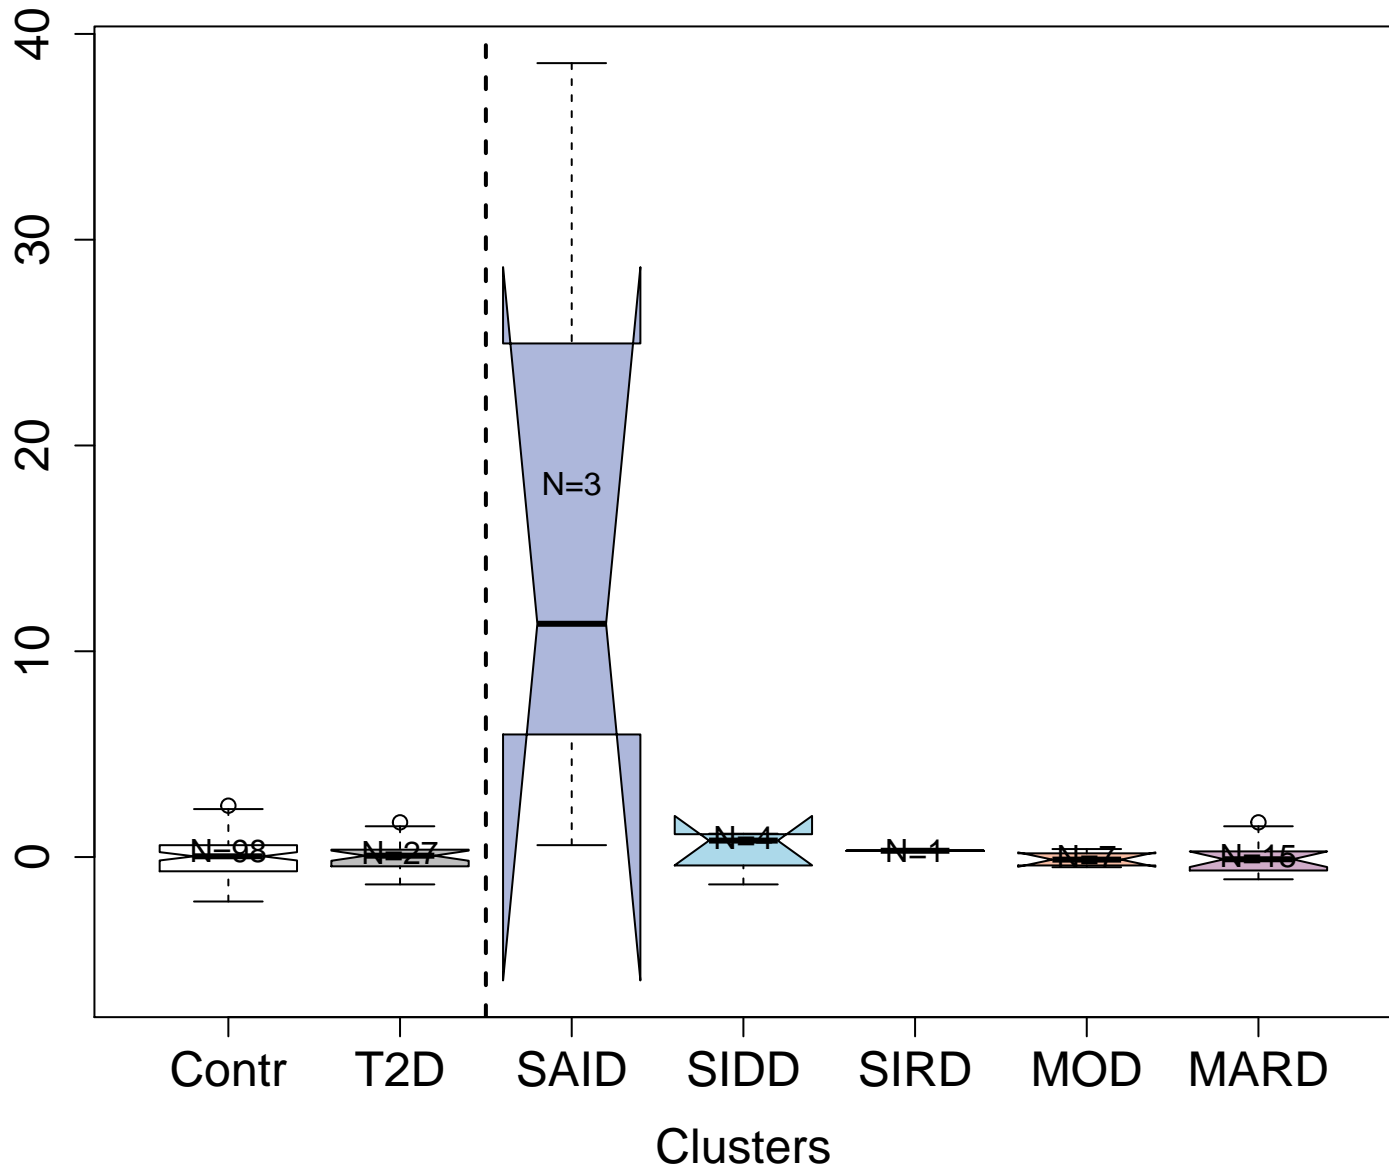

M46627 : X - 12740

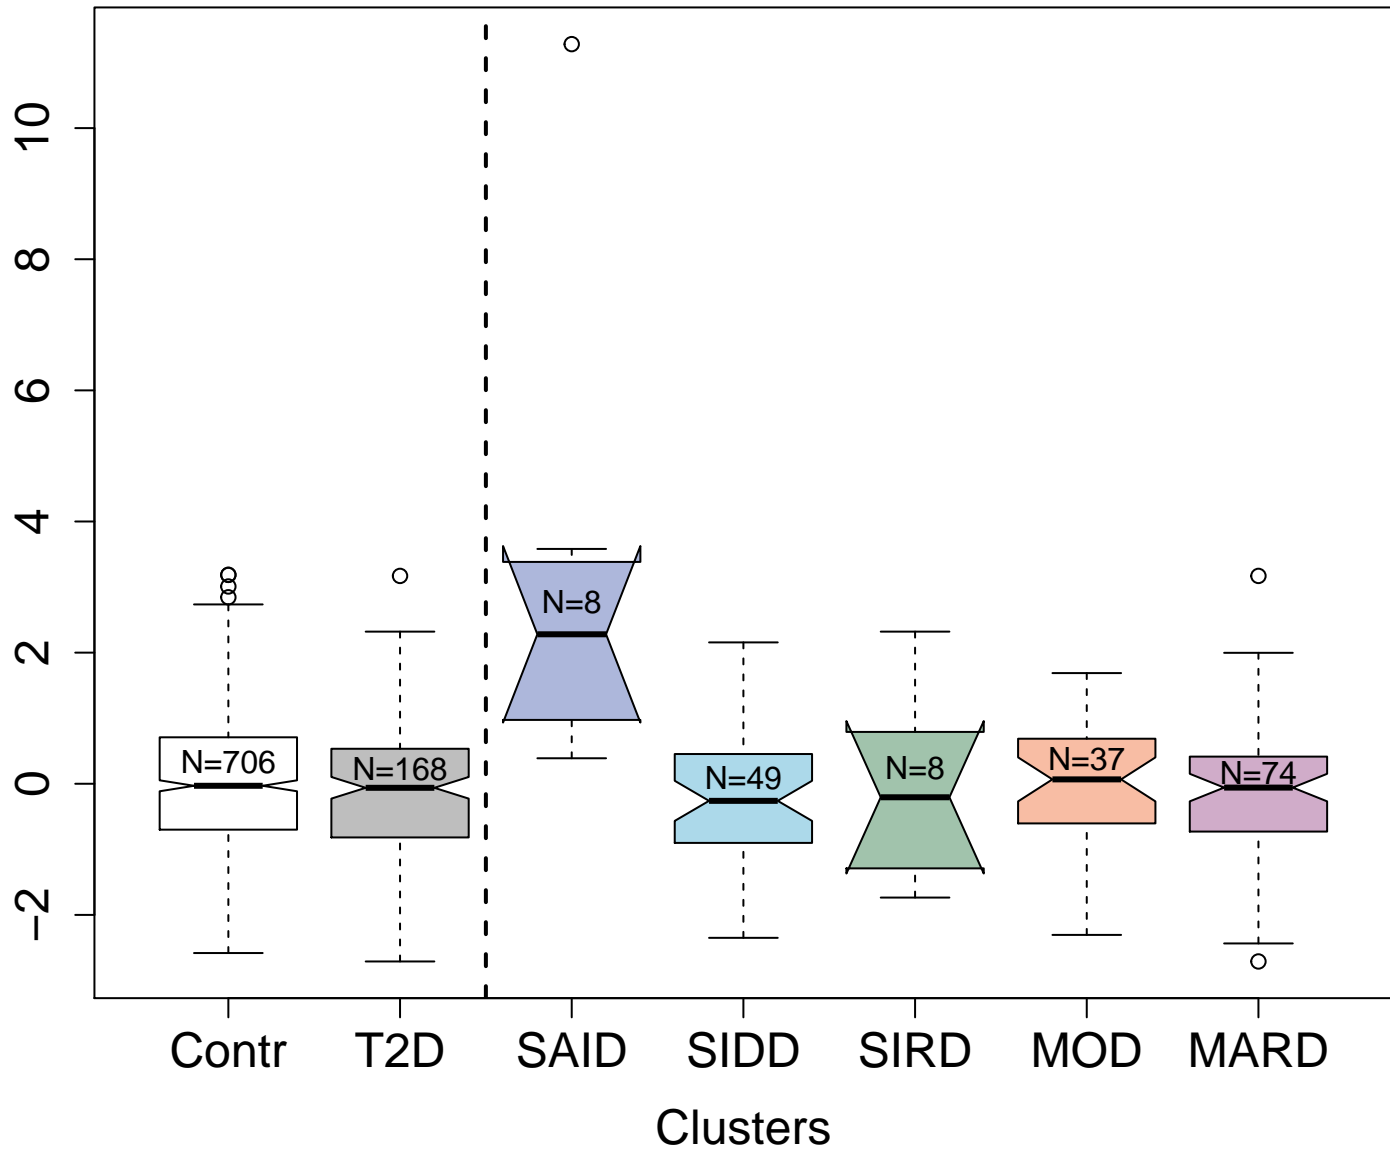



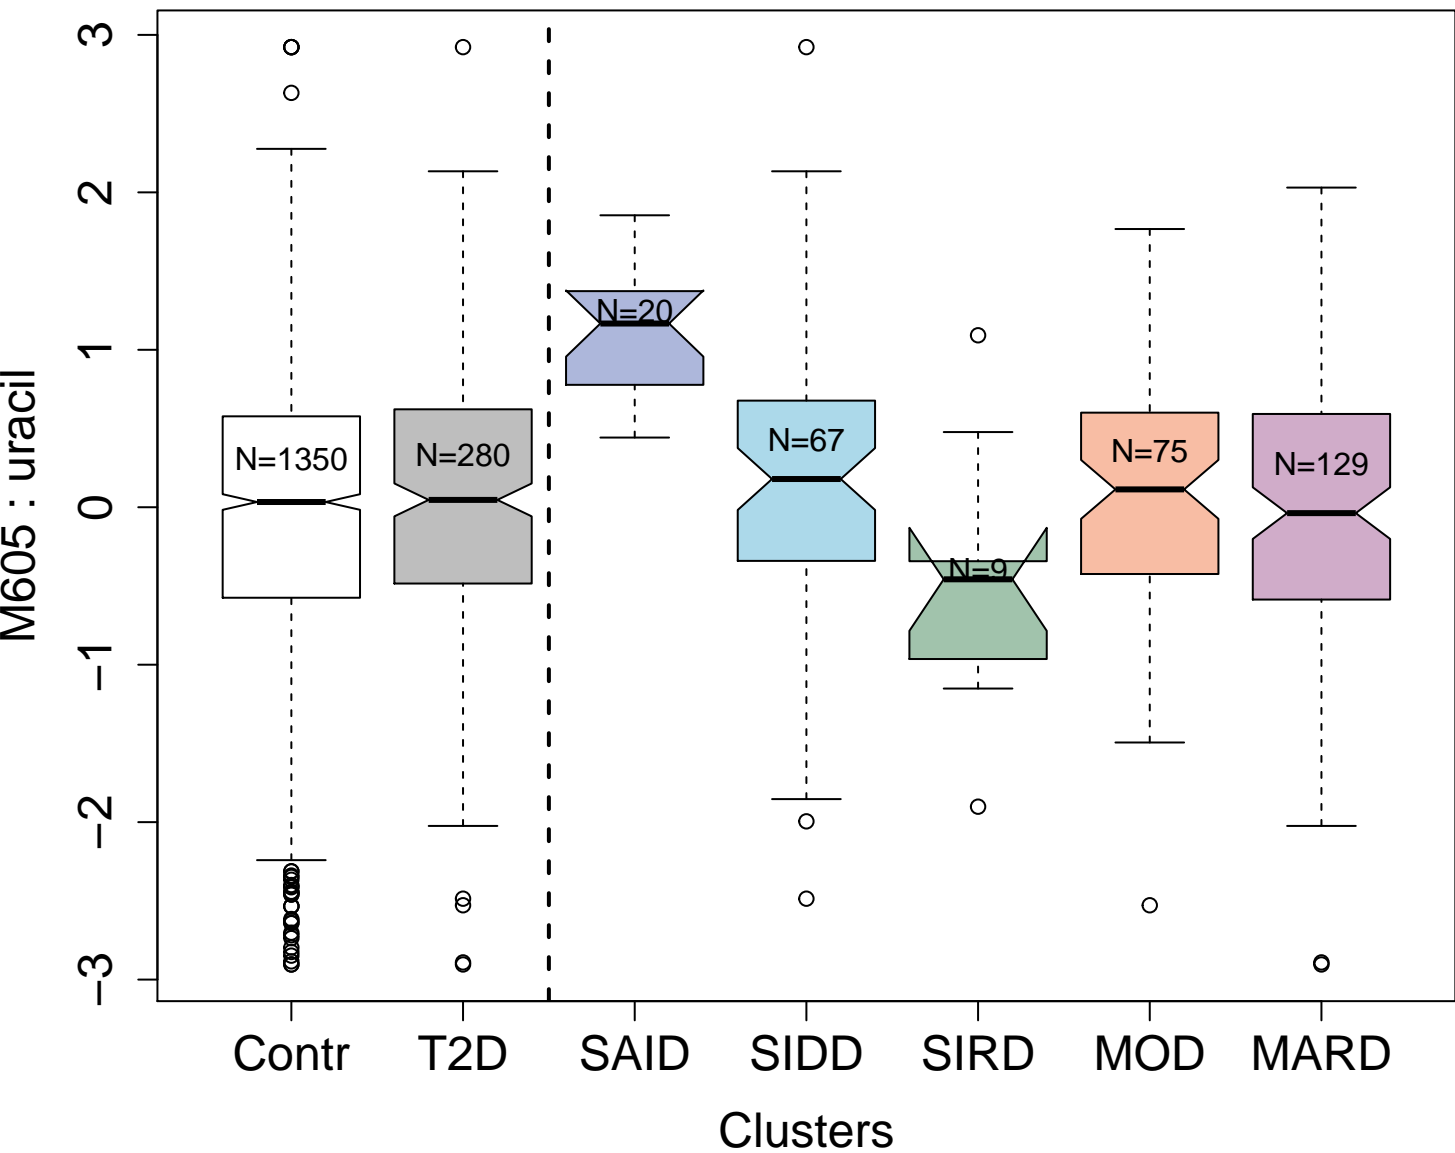

M2133 : inosine 5' -monophosphate (IMP)

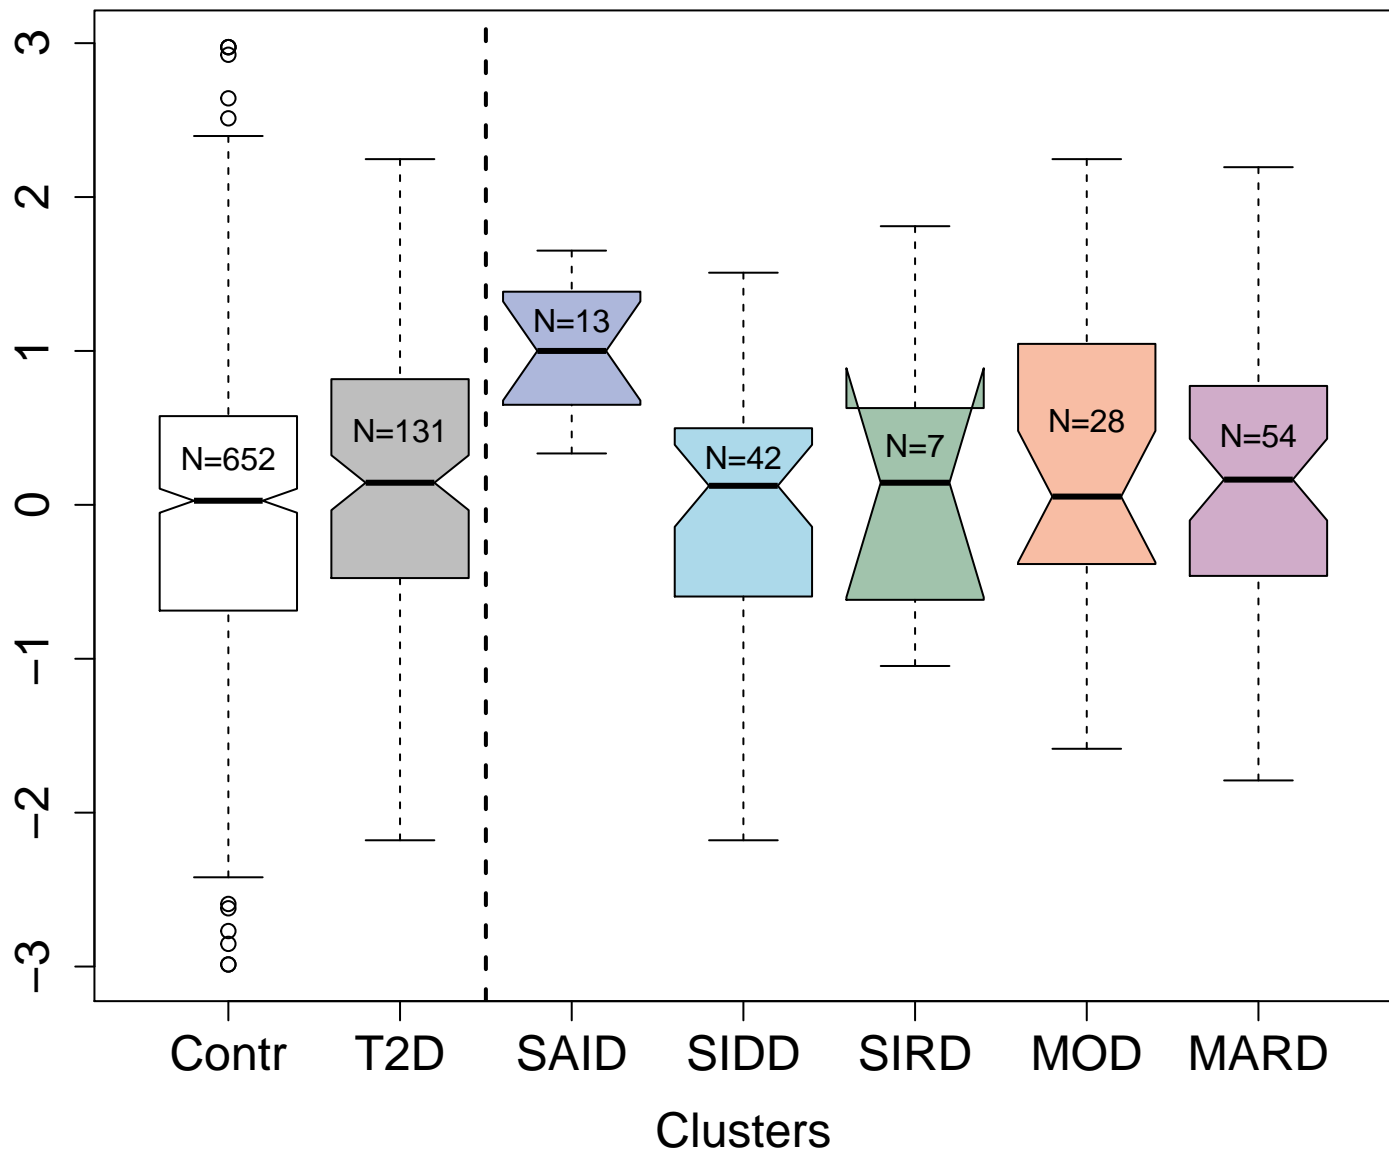

M47662 : X - 12830

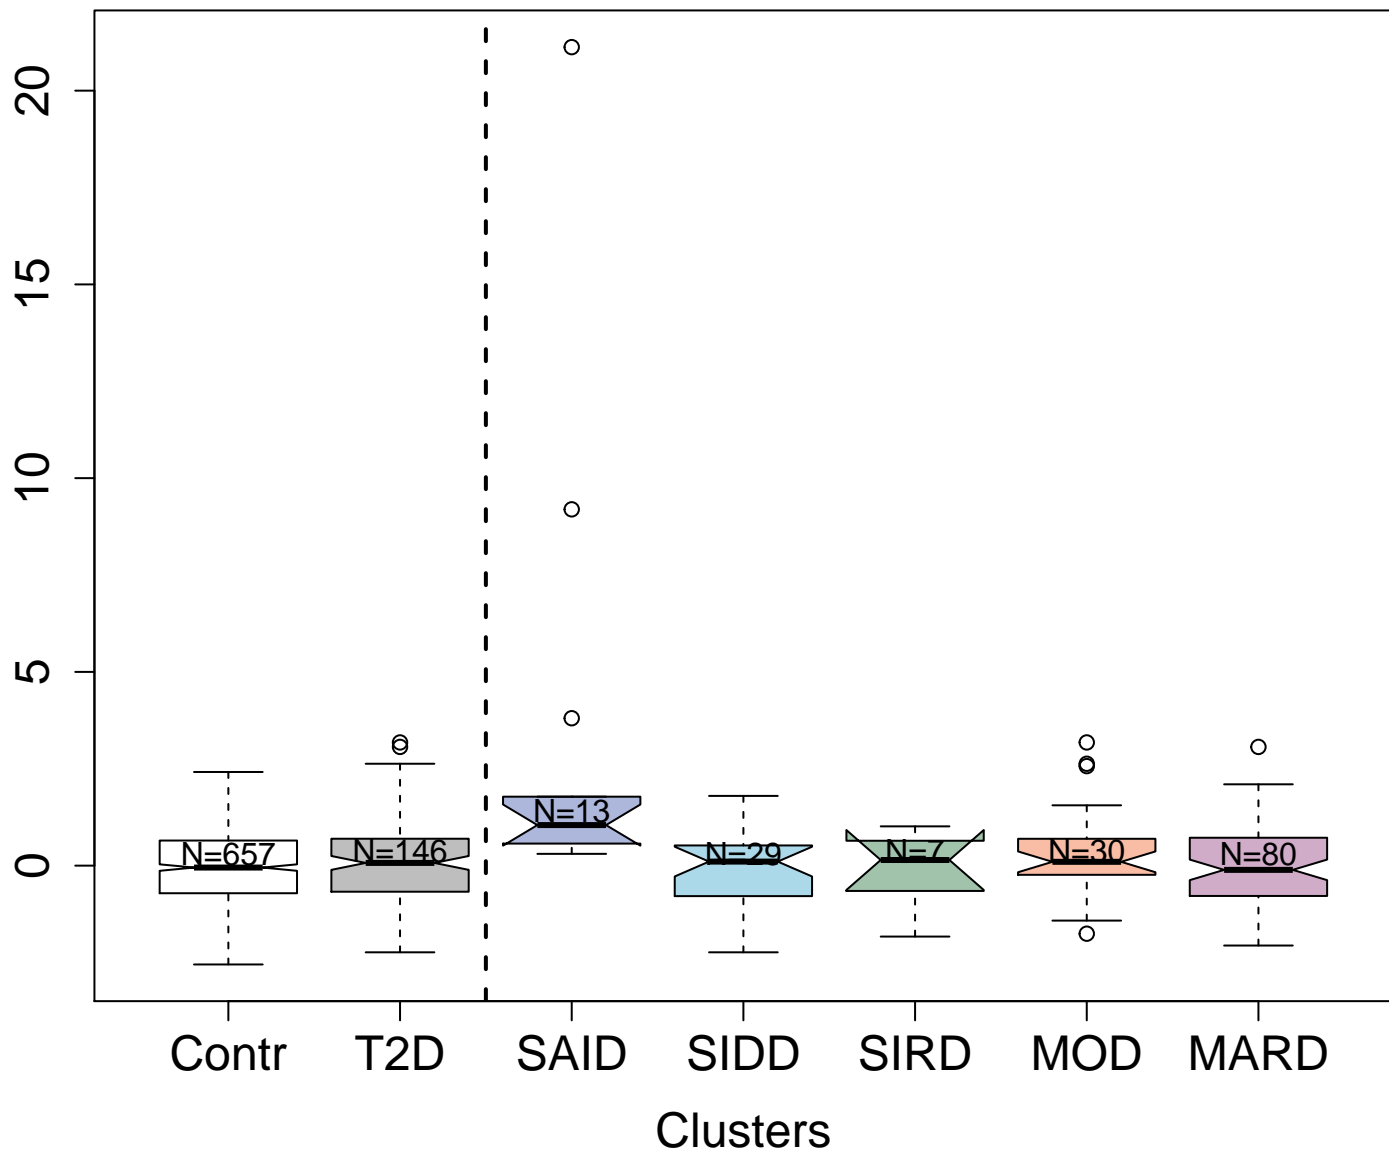

M35322 : hydroquinone sulfate

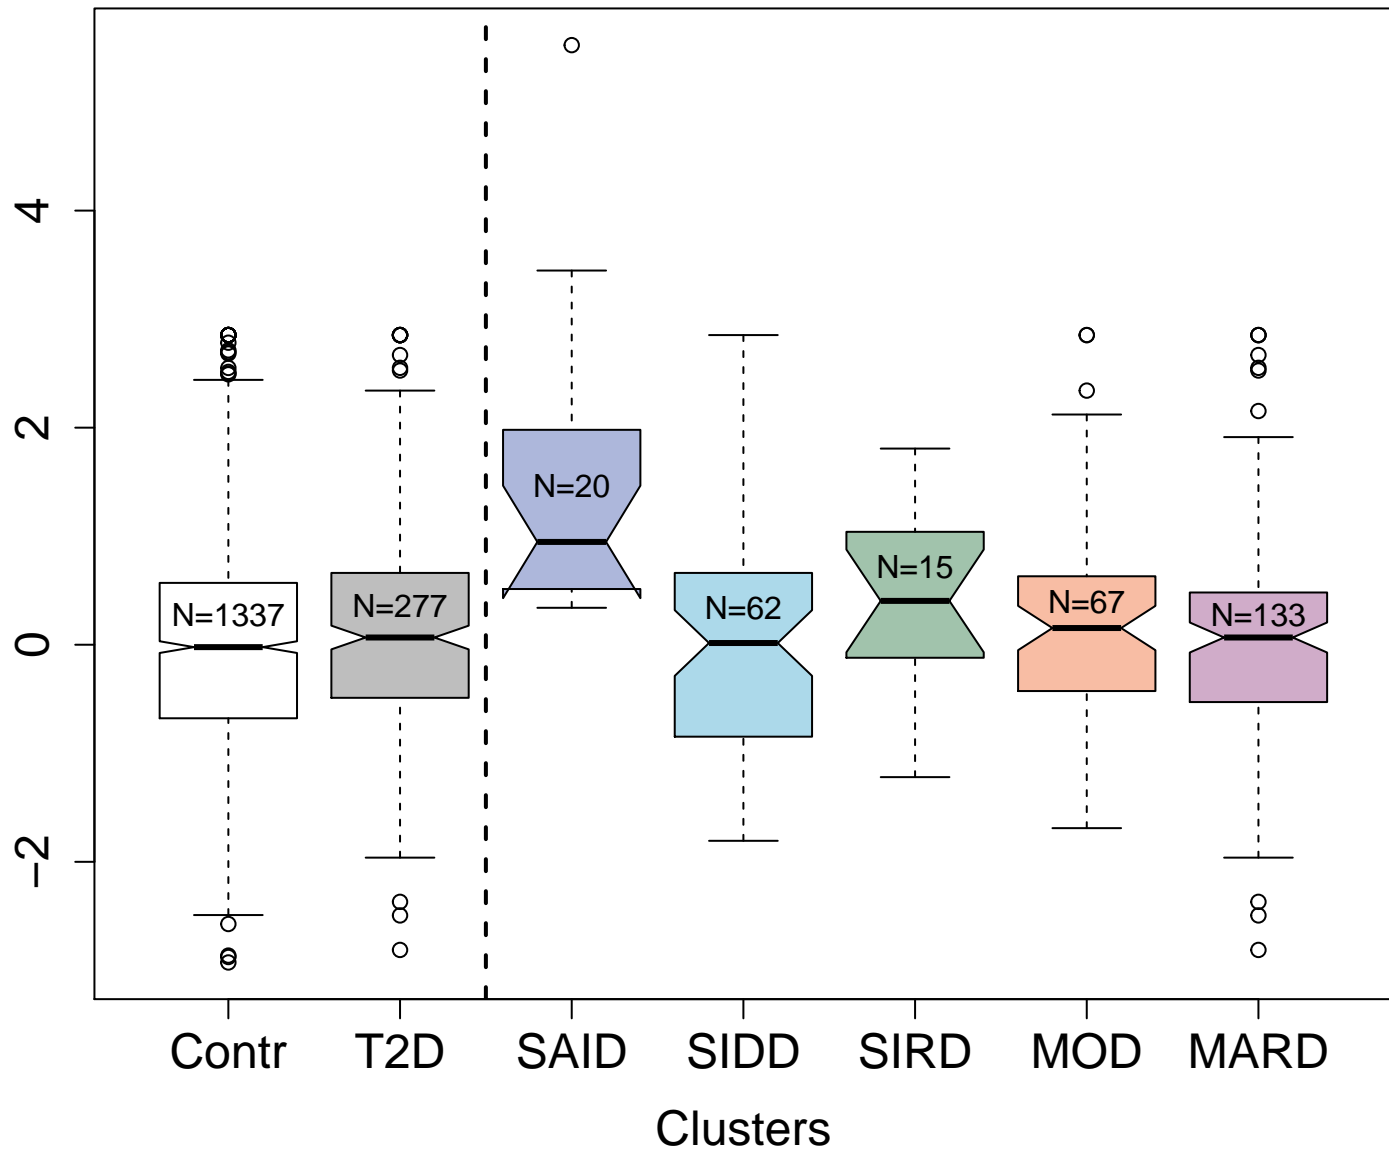

M43256 : N-acetyl-3-methylhistidine\*

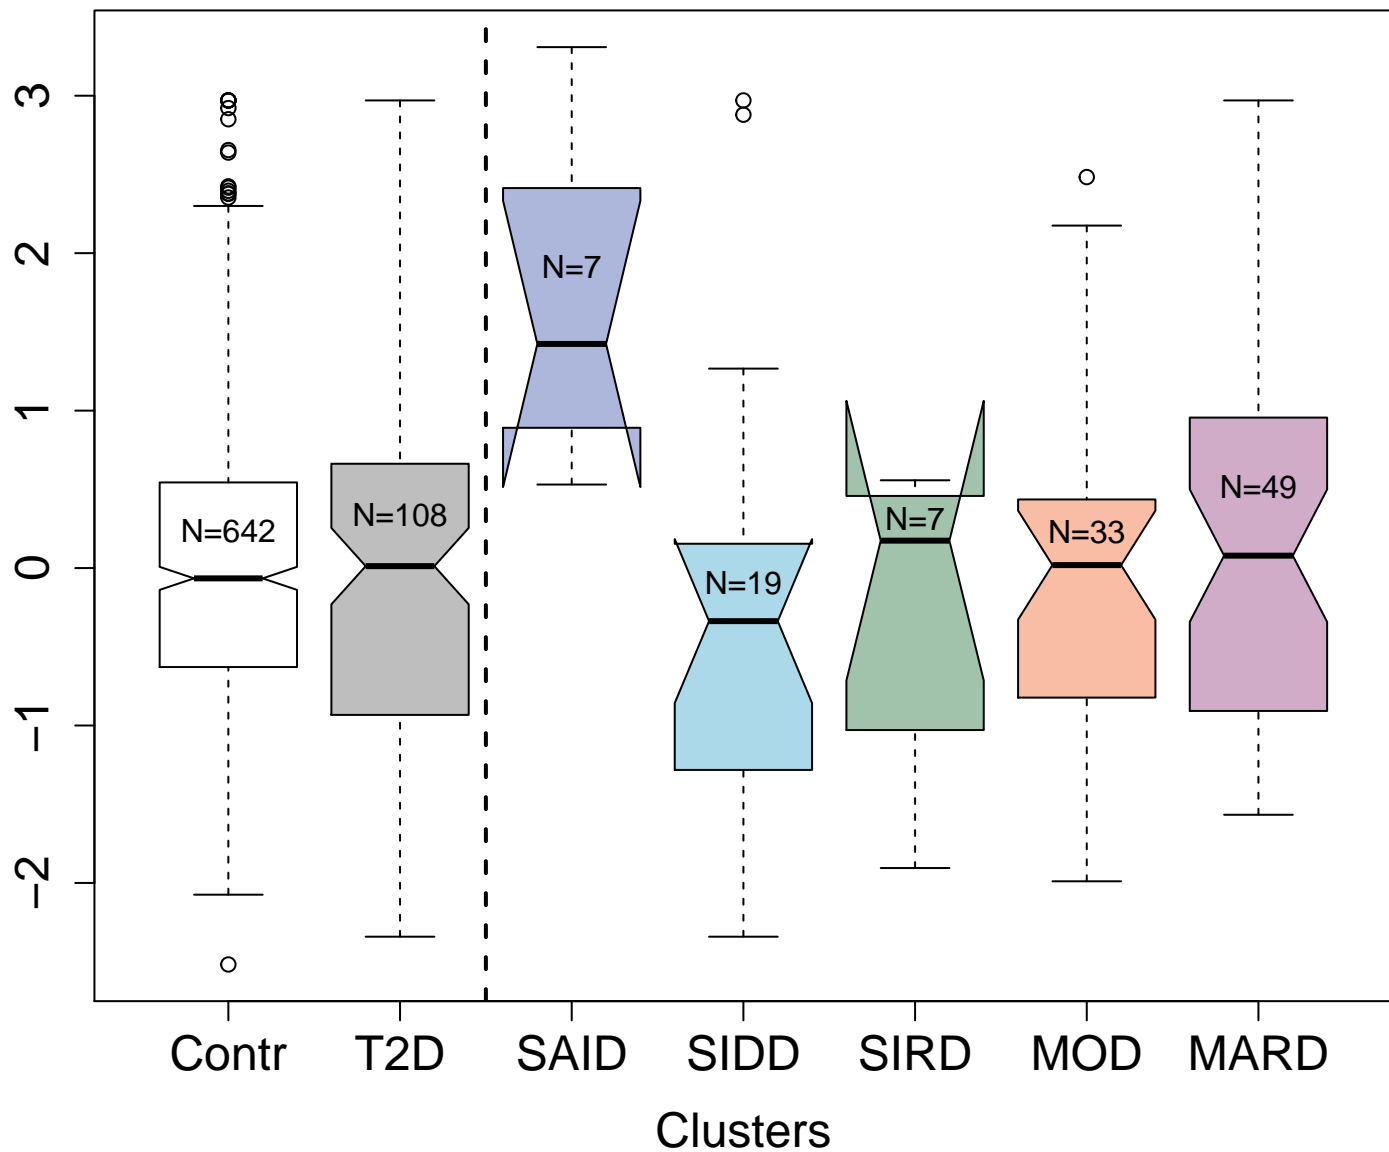

M37207 : androstenediol (3alpha, 17alpha) monosulfate (2)

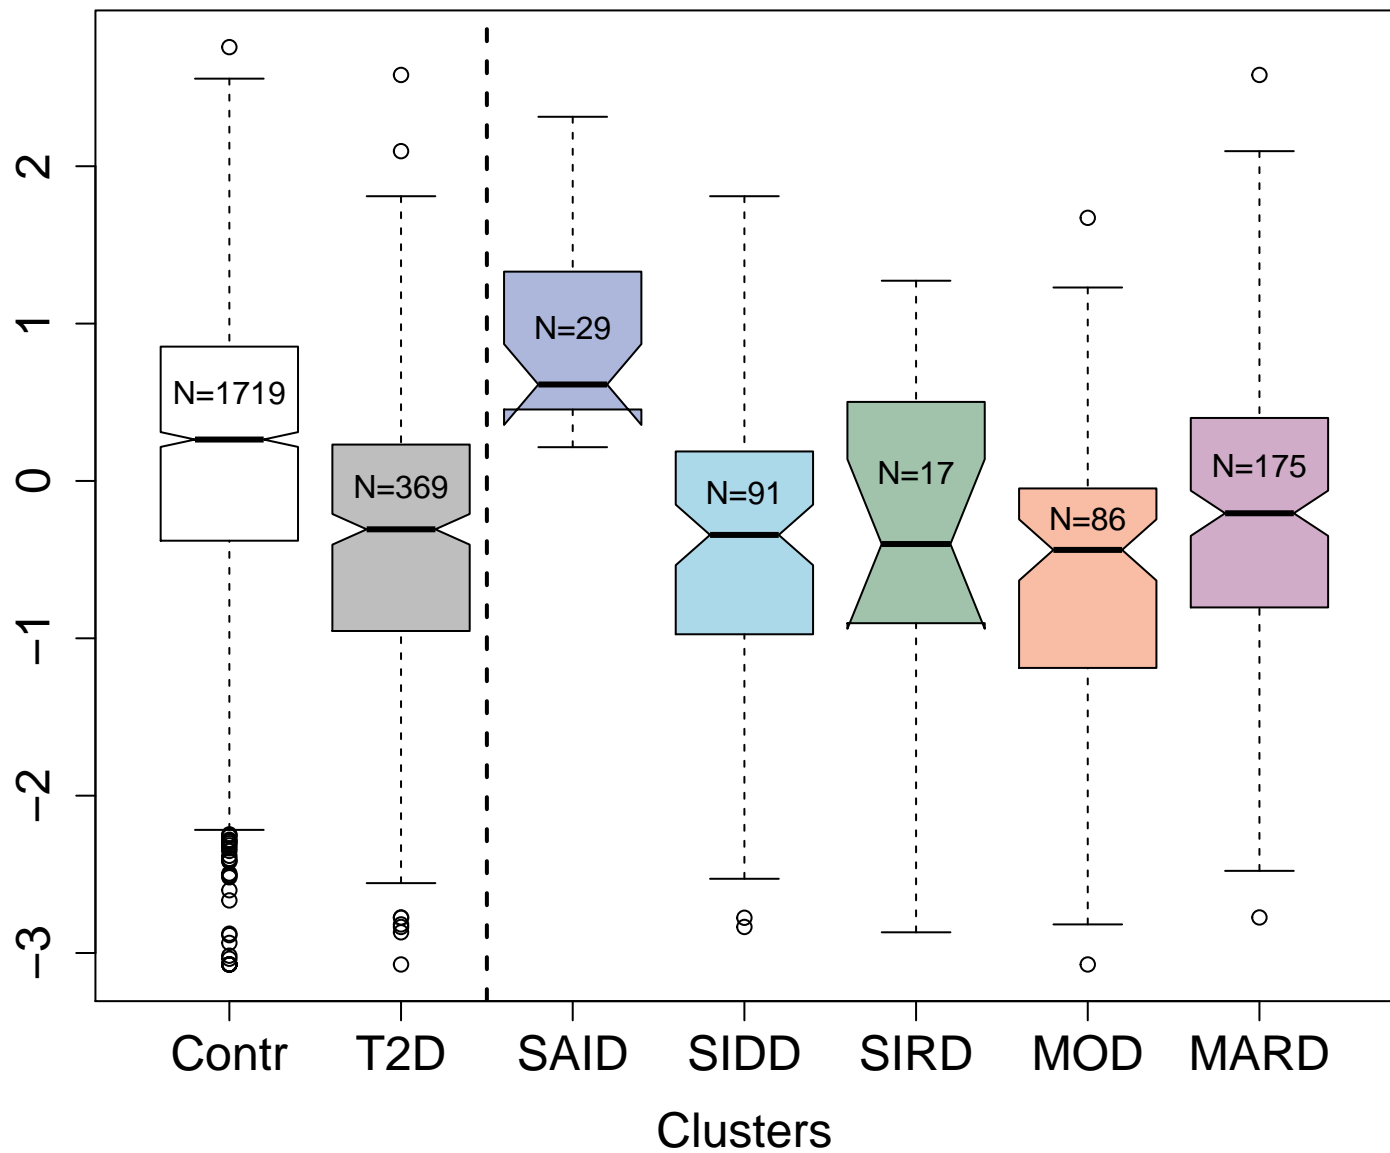

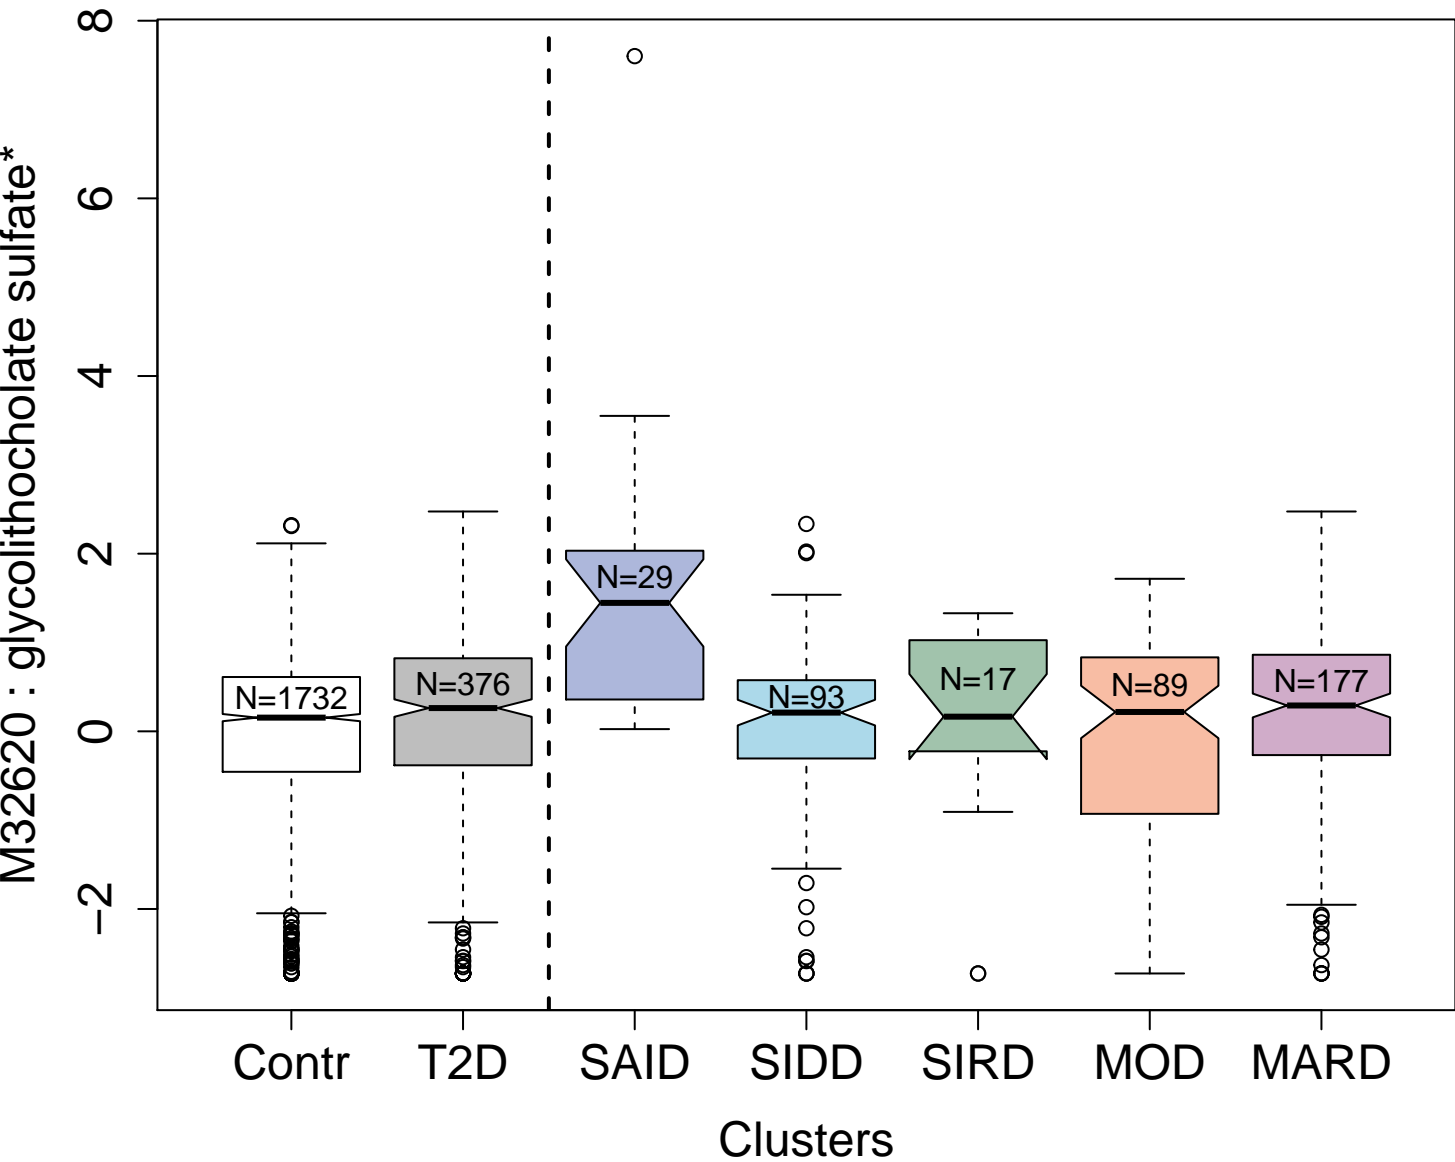

M53267 : X - 24748

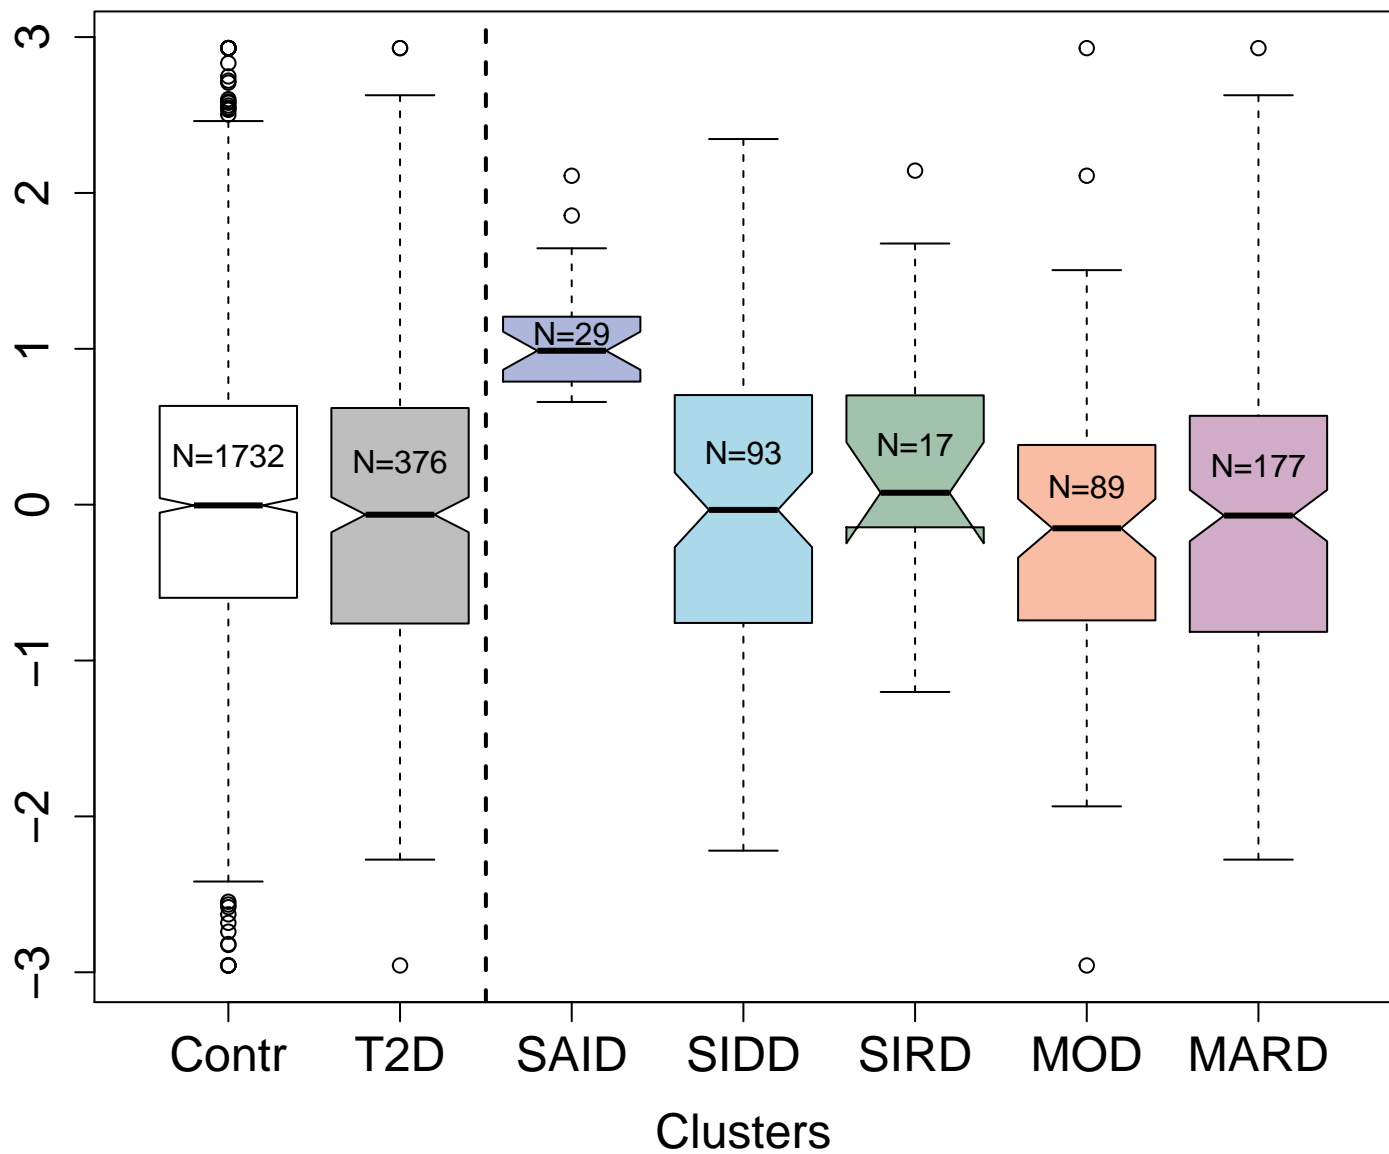



M48997 : isoeugenol sulfate

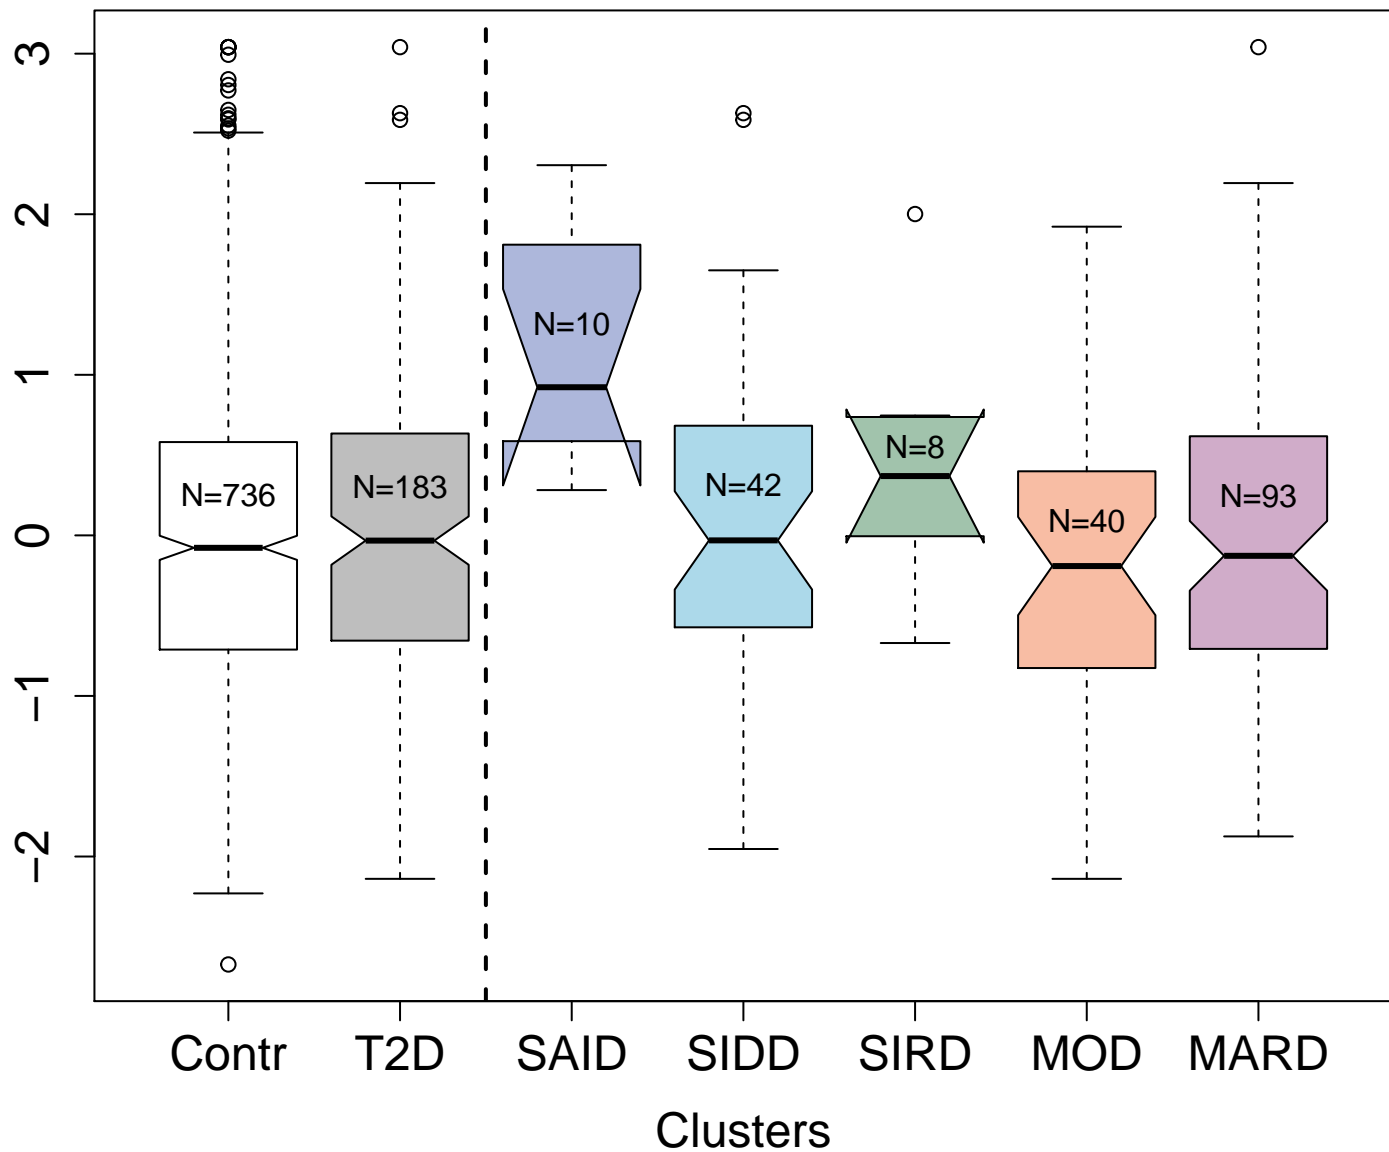

M57547 : 2,3-dihydroxy-2-methylbutyrate

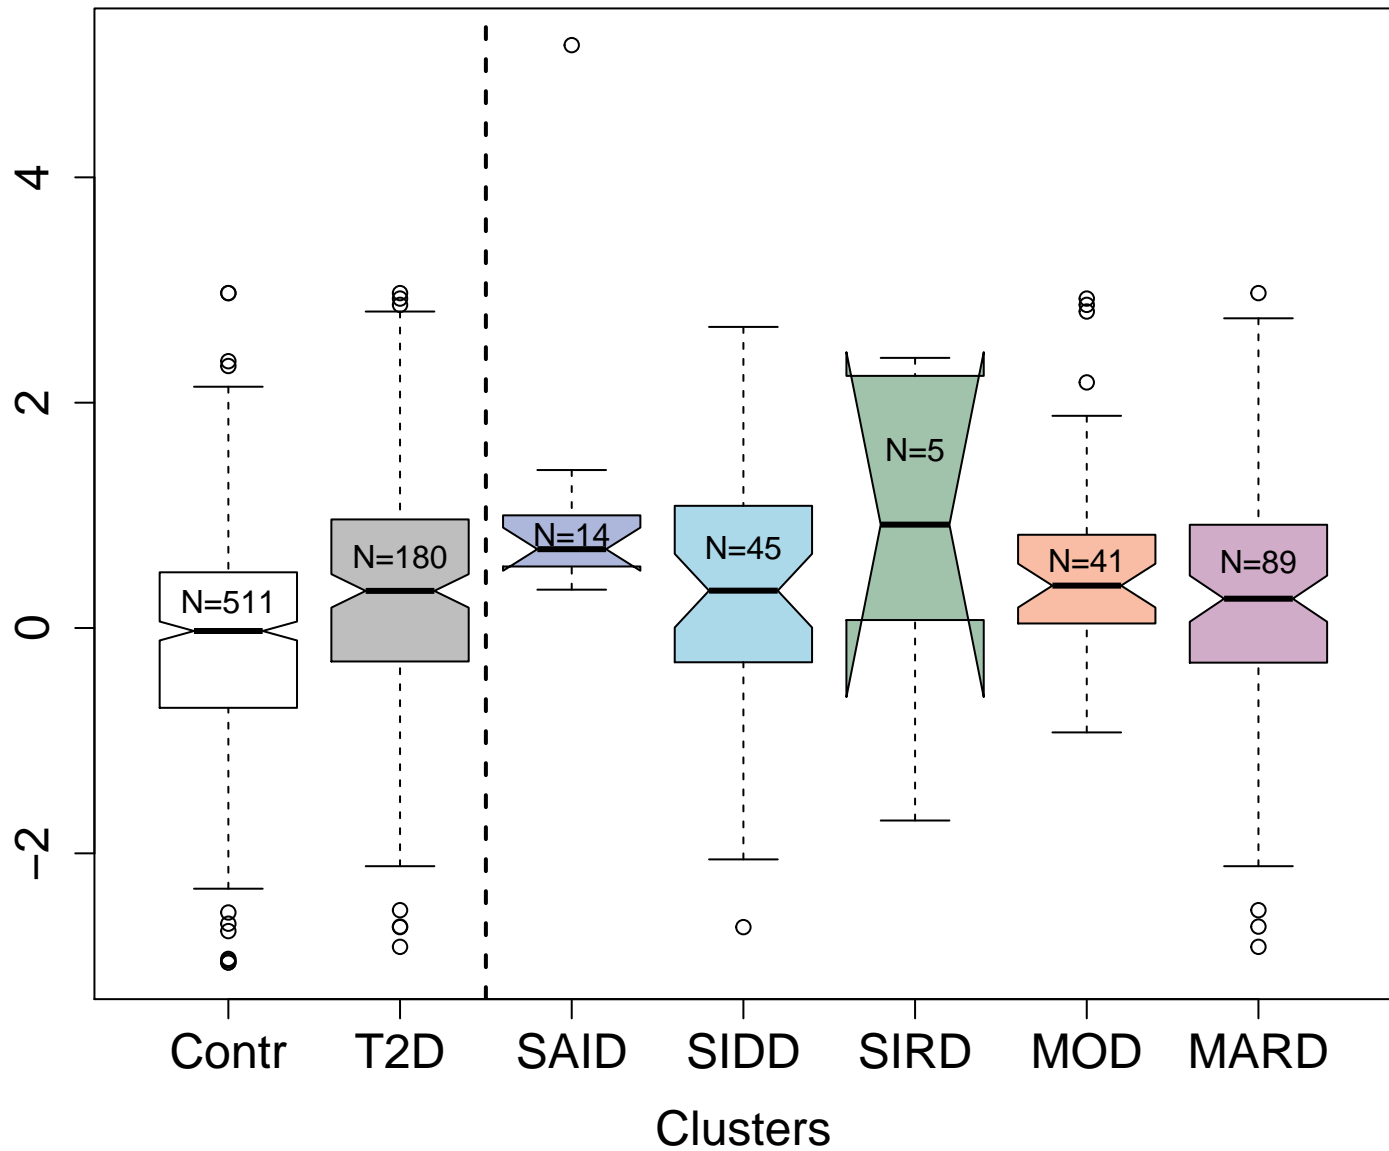

M38637 : cinnamoylglycine

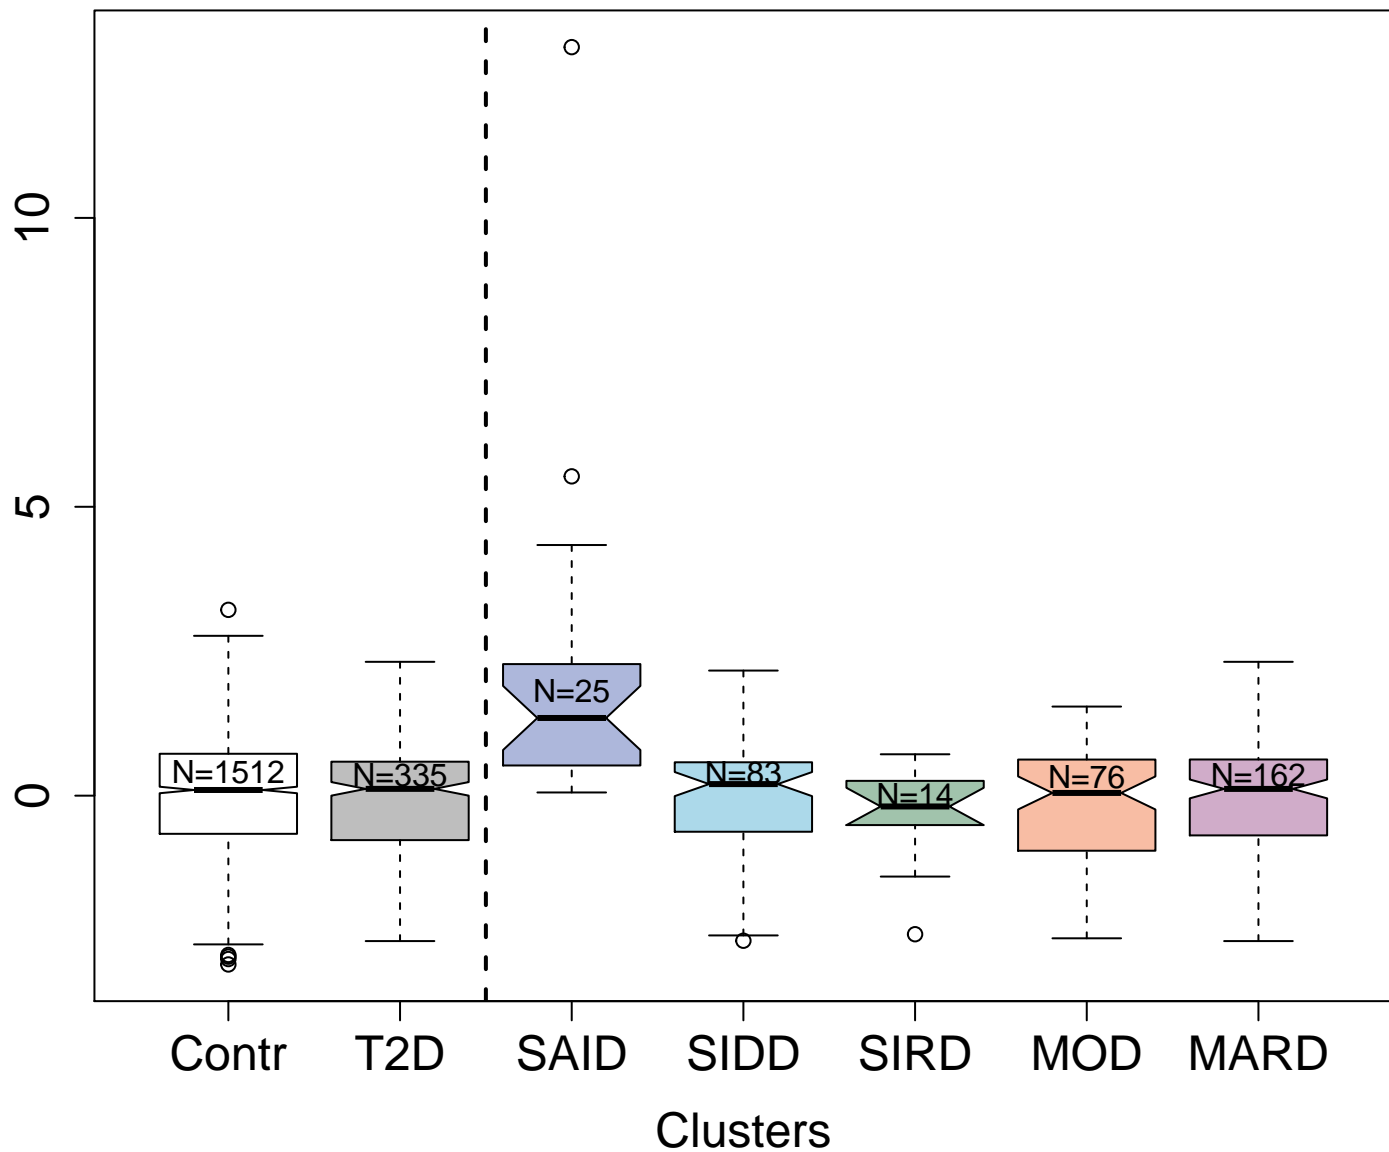

M46700 : X - 18922

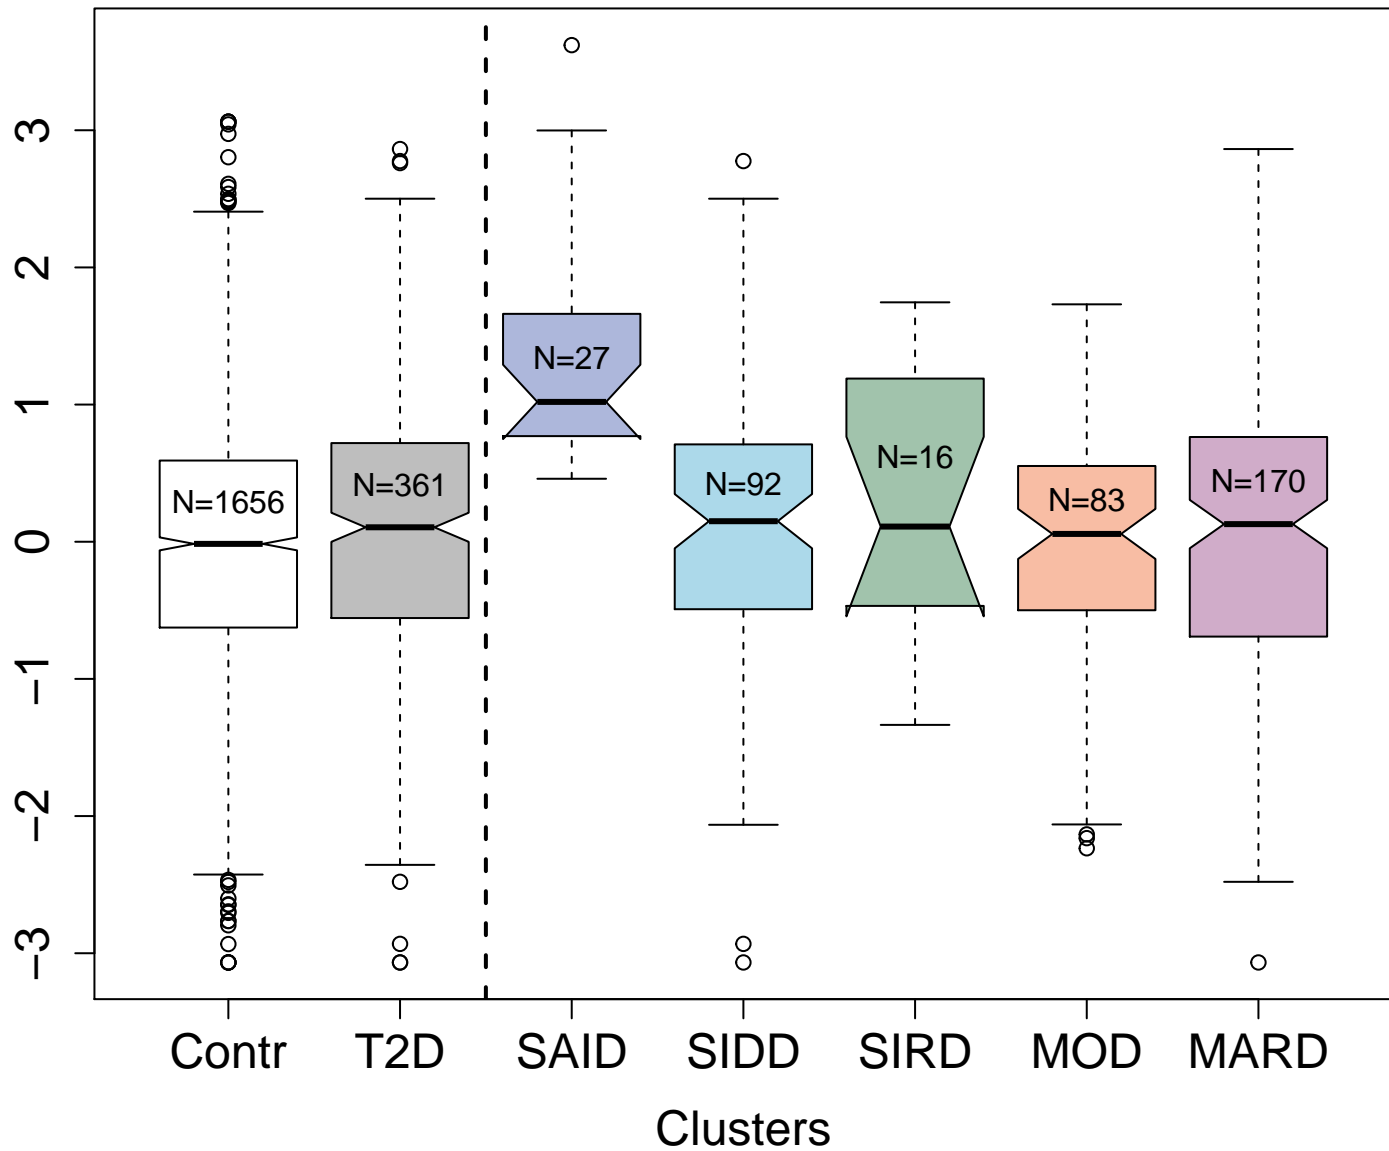

M62299 : sulfate of piperine metabolite C18H21NO3 (3)\*

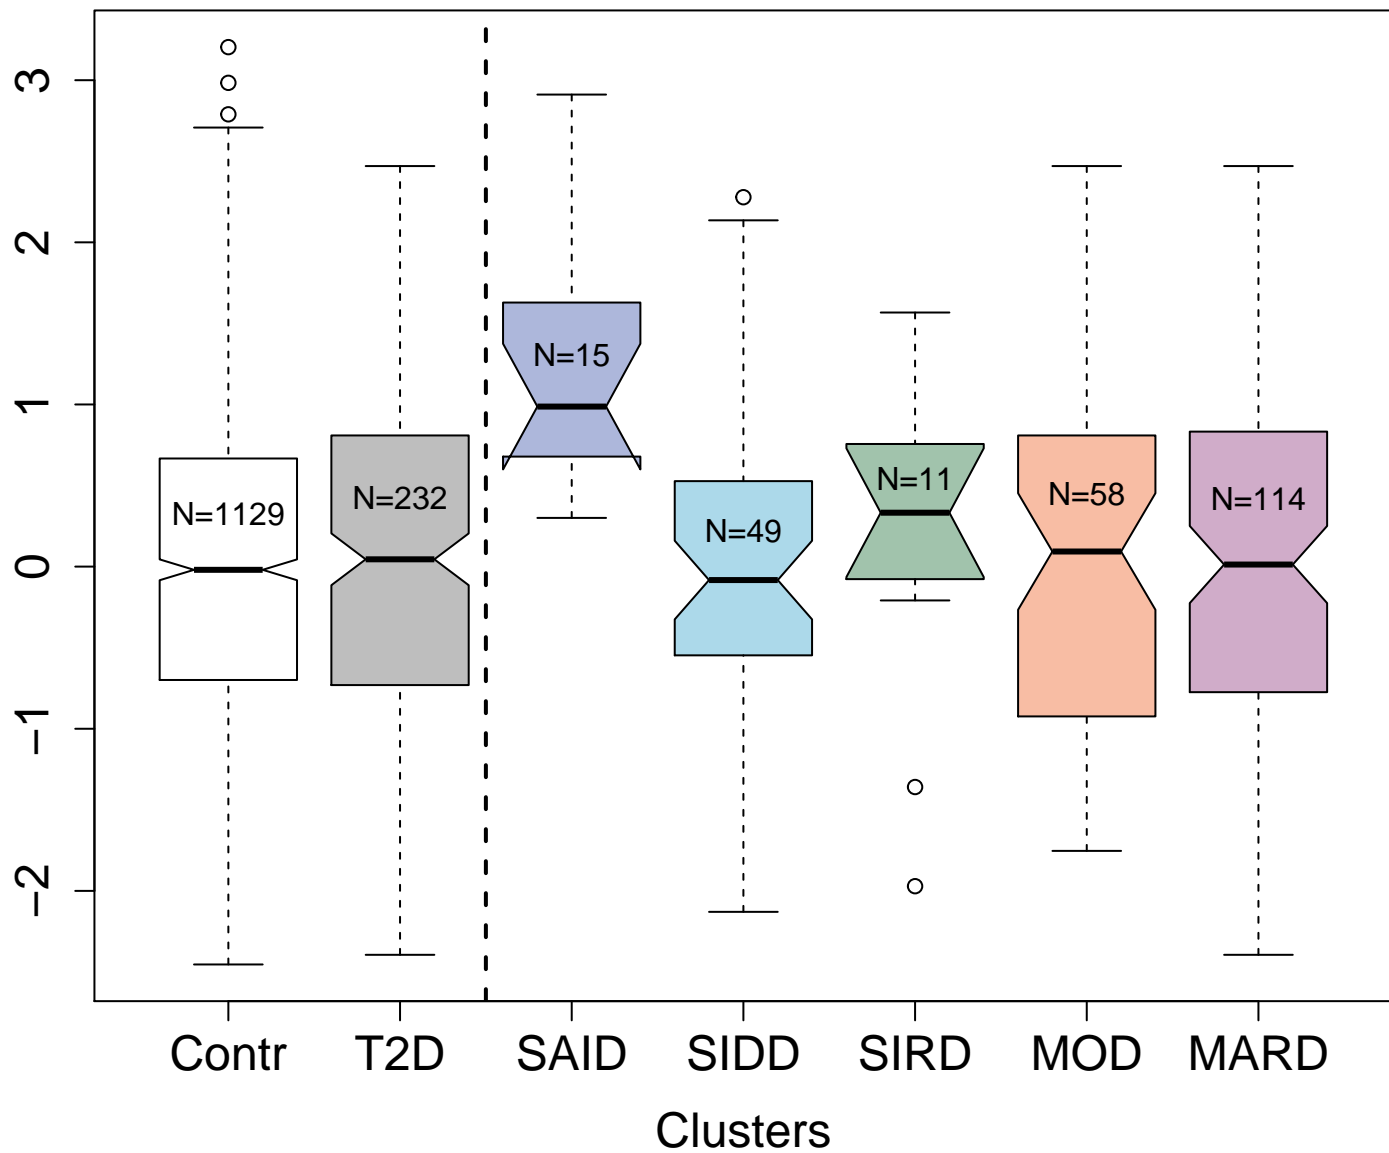

M52843 : X - 24522

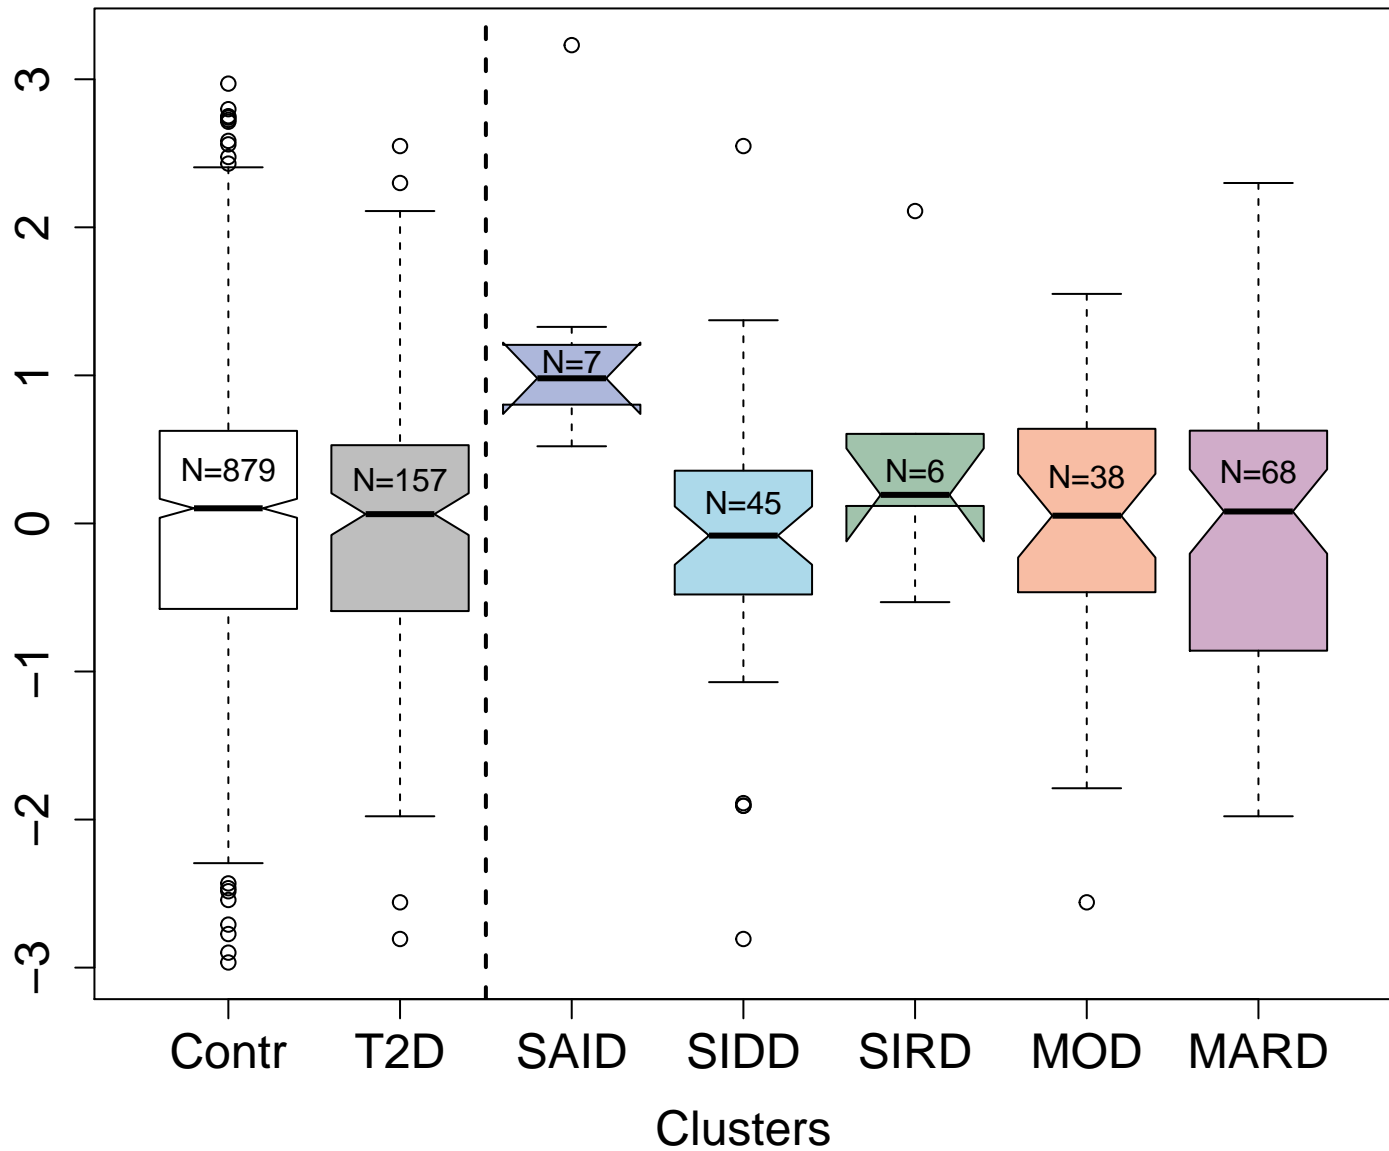

M40007 : carboxyethyl-GABA

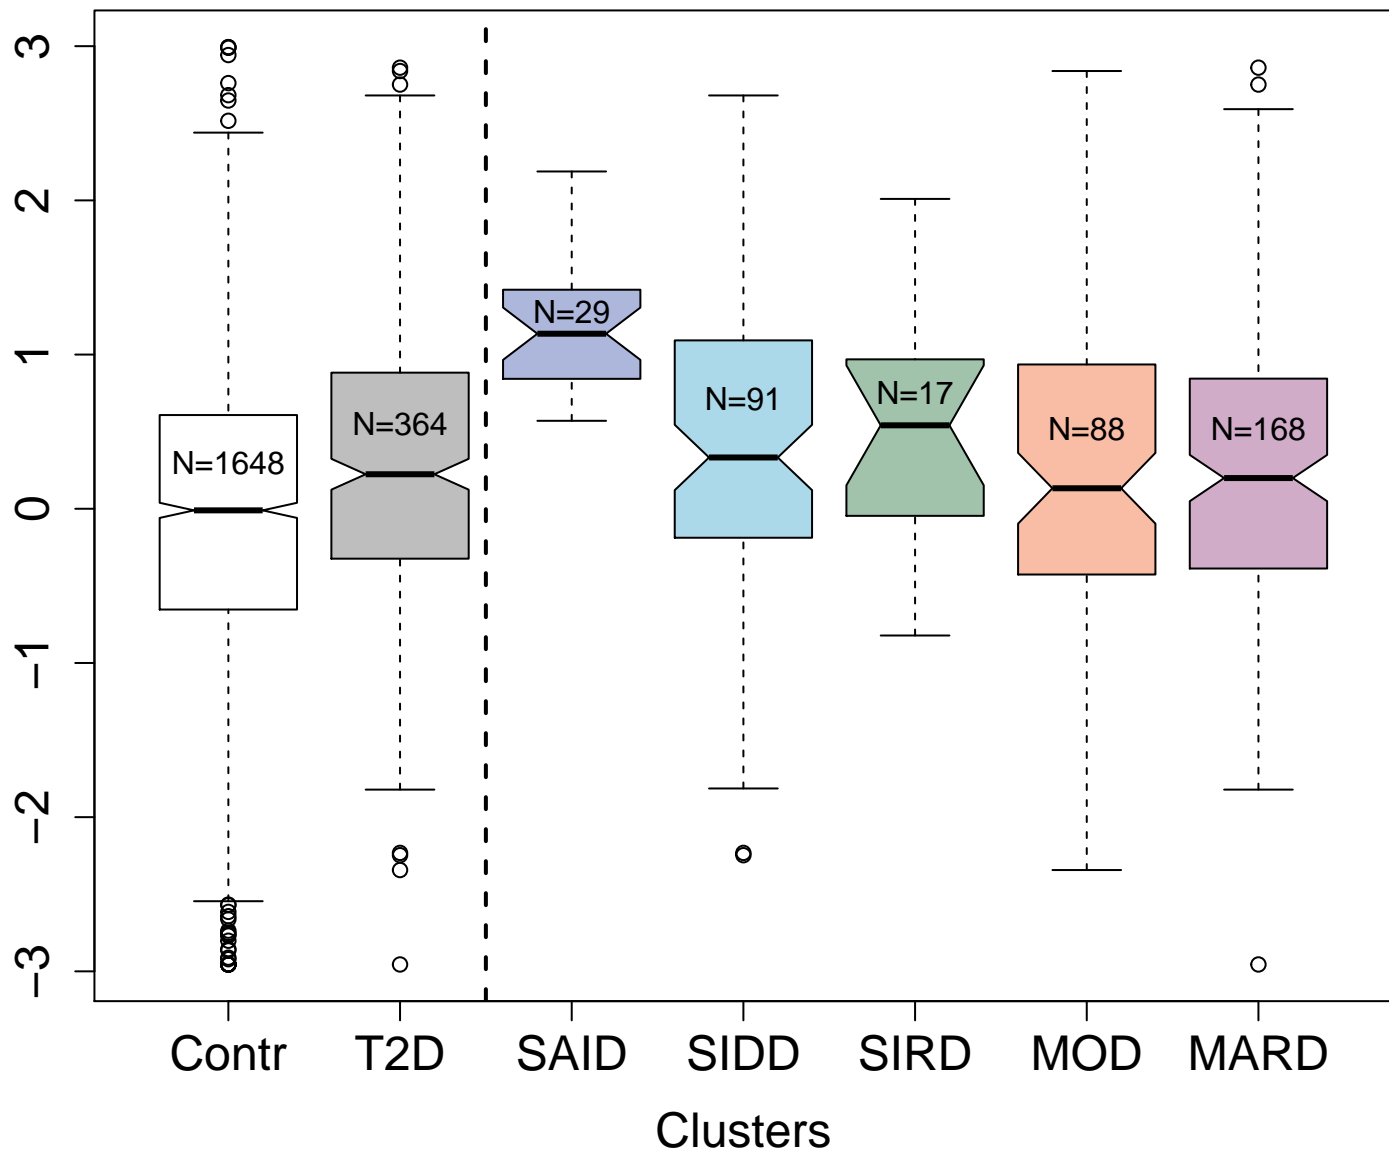

M1516 : sarcosine

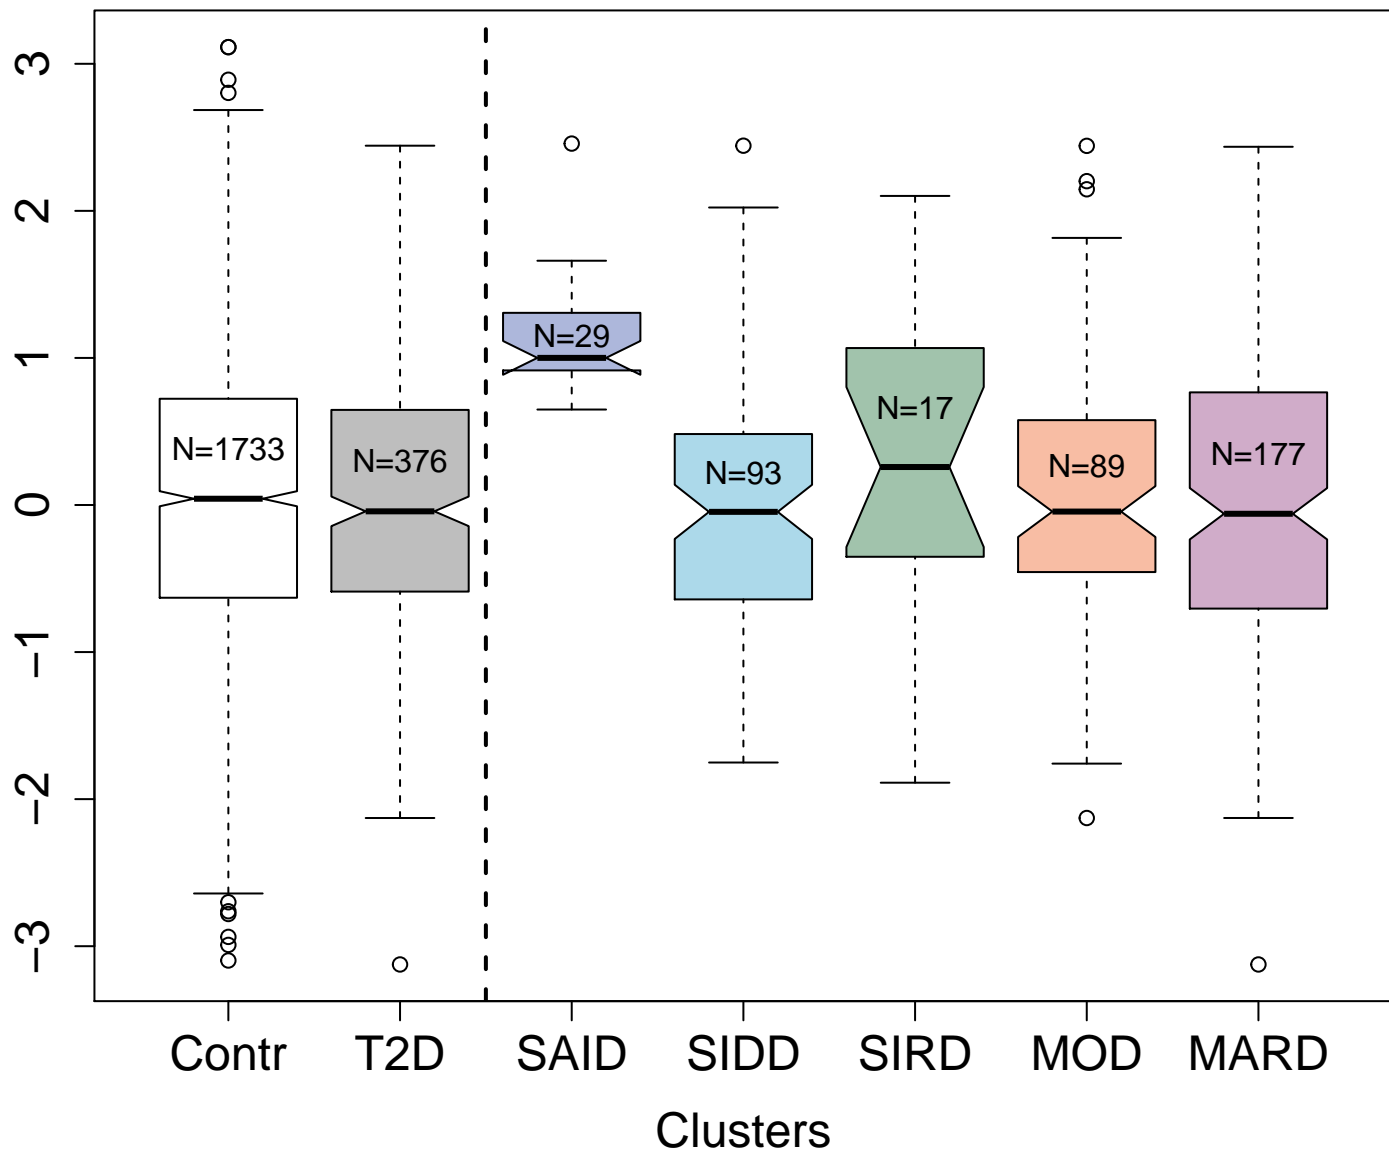



M38140 : 1-hydroxy-2-naphthalenecarboxylate

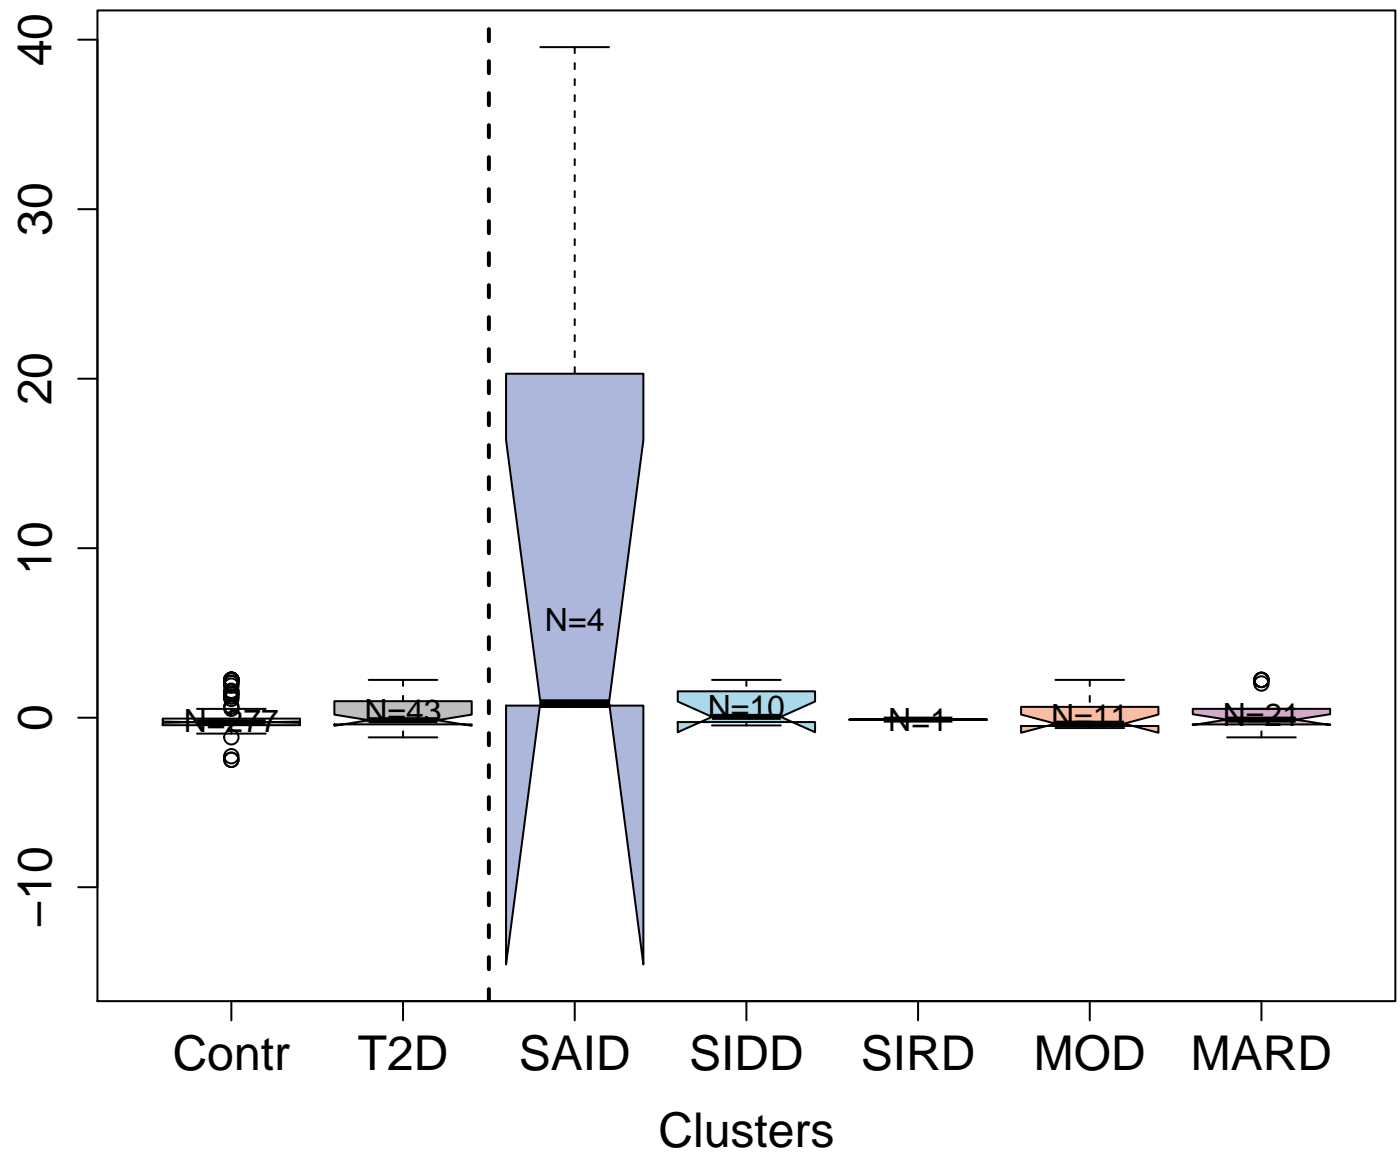

M1868 : cysteine

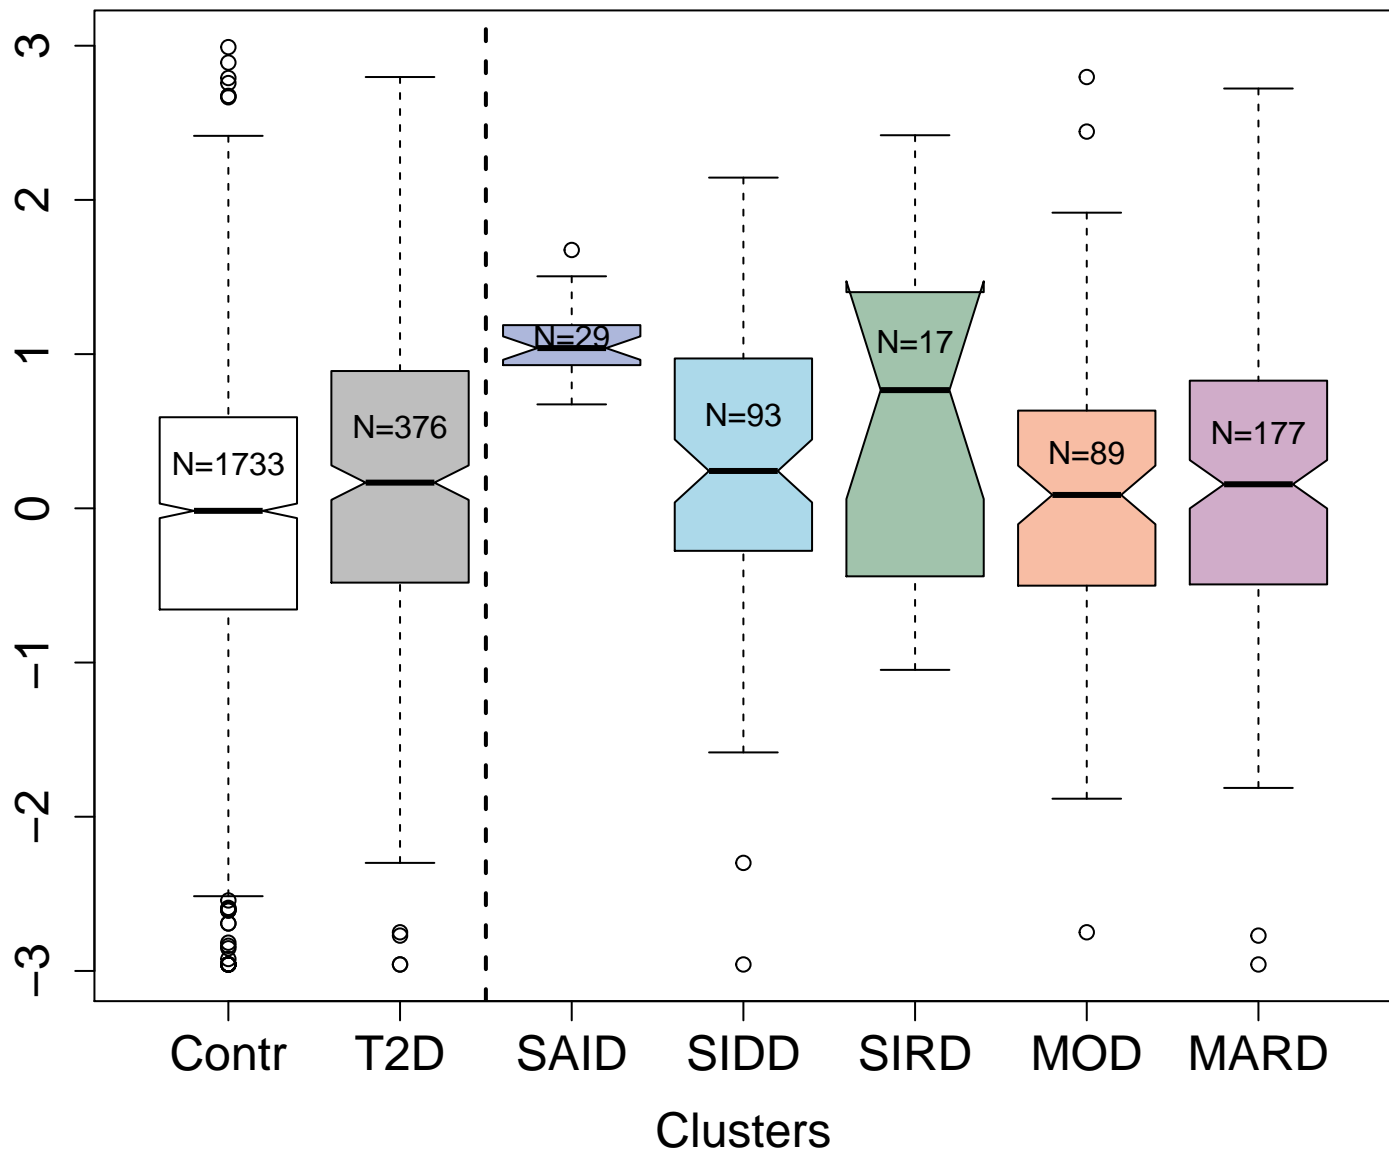

M48003 : X - 17353

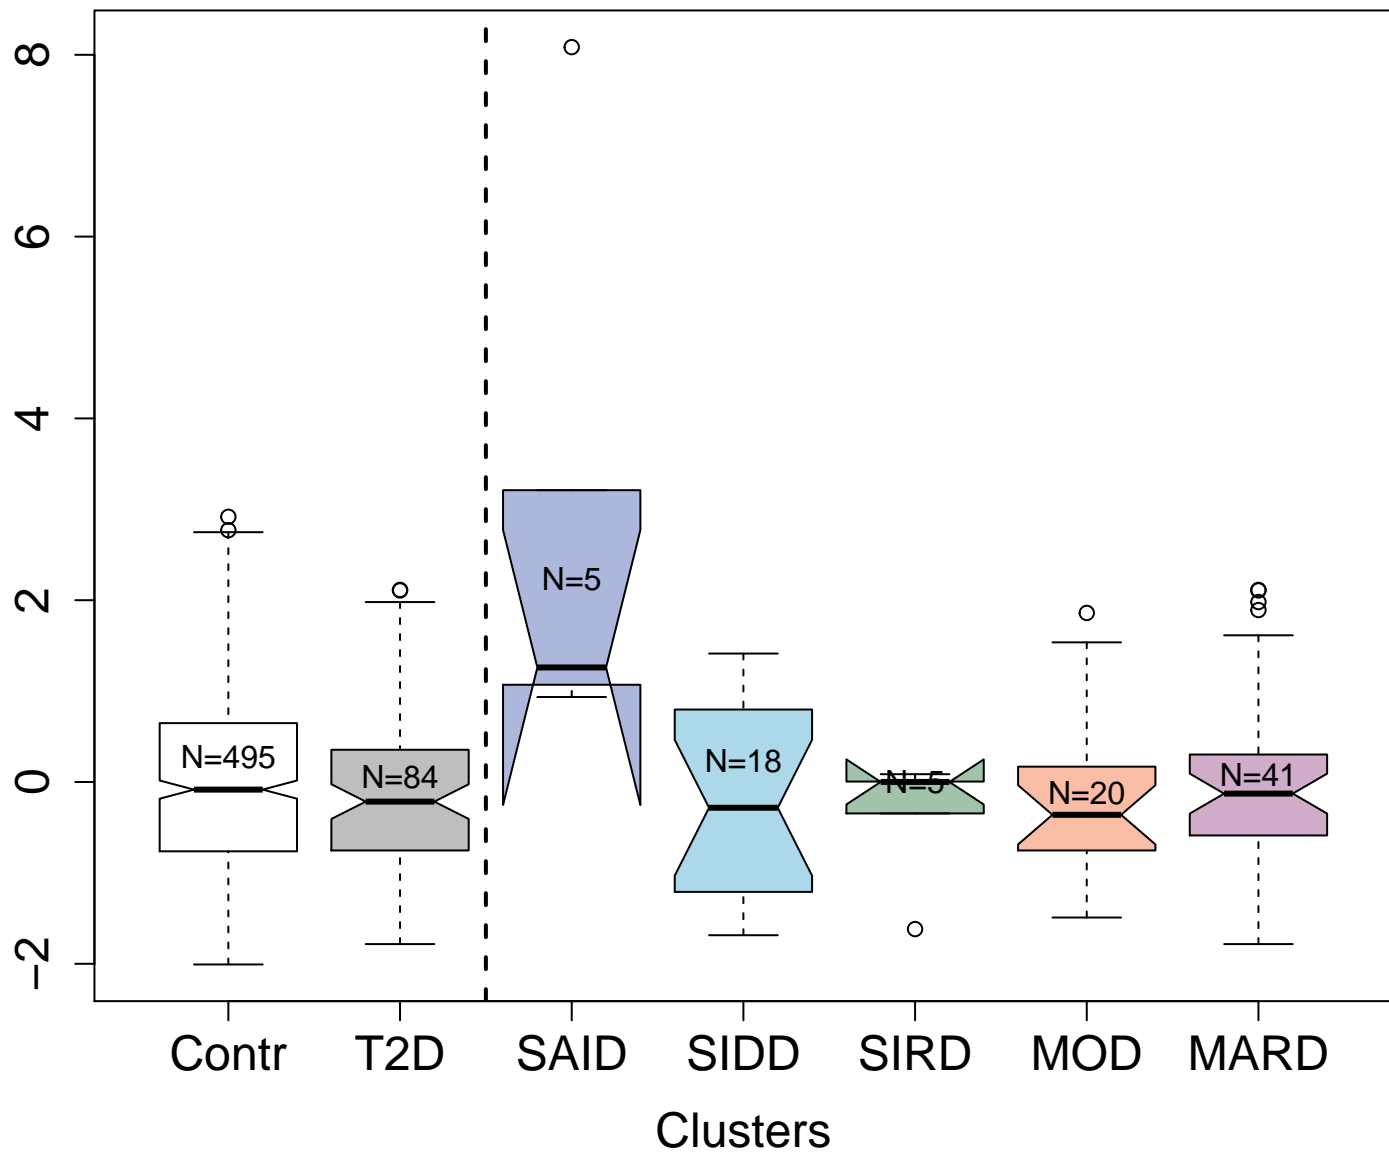

M31932 : propionylglycine

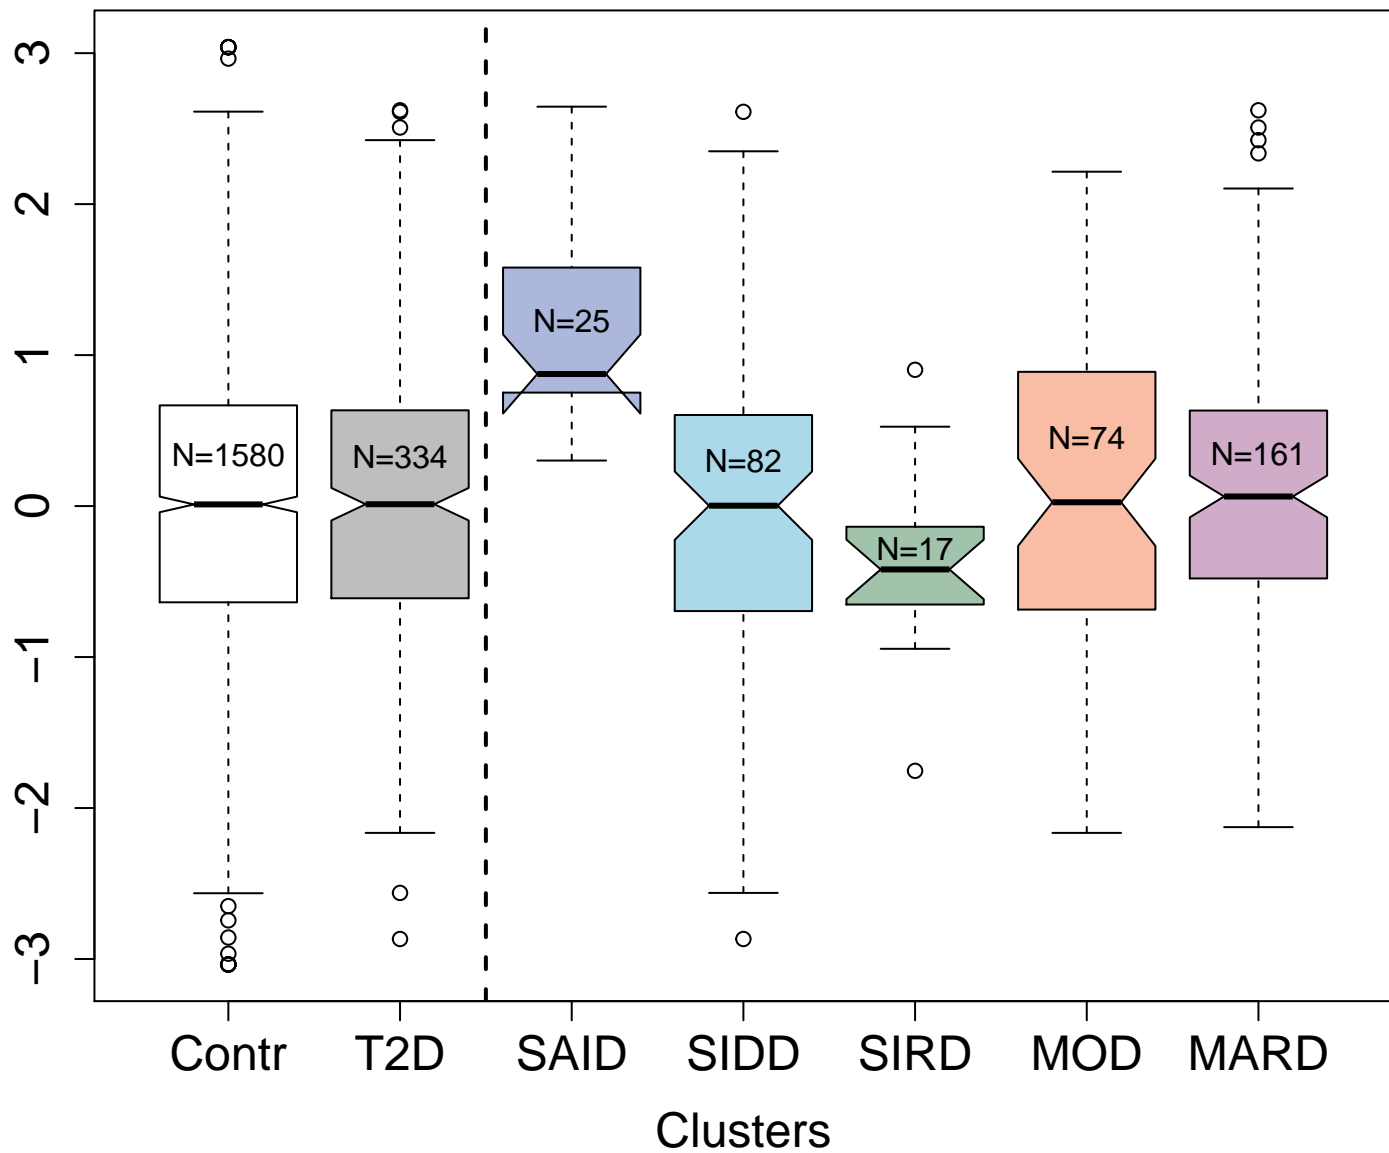

M45721 : 3-(N-acetyl-L-cystein-S-y) acetaminophen

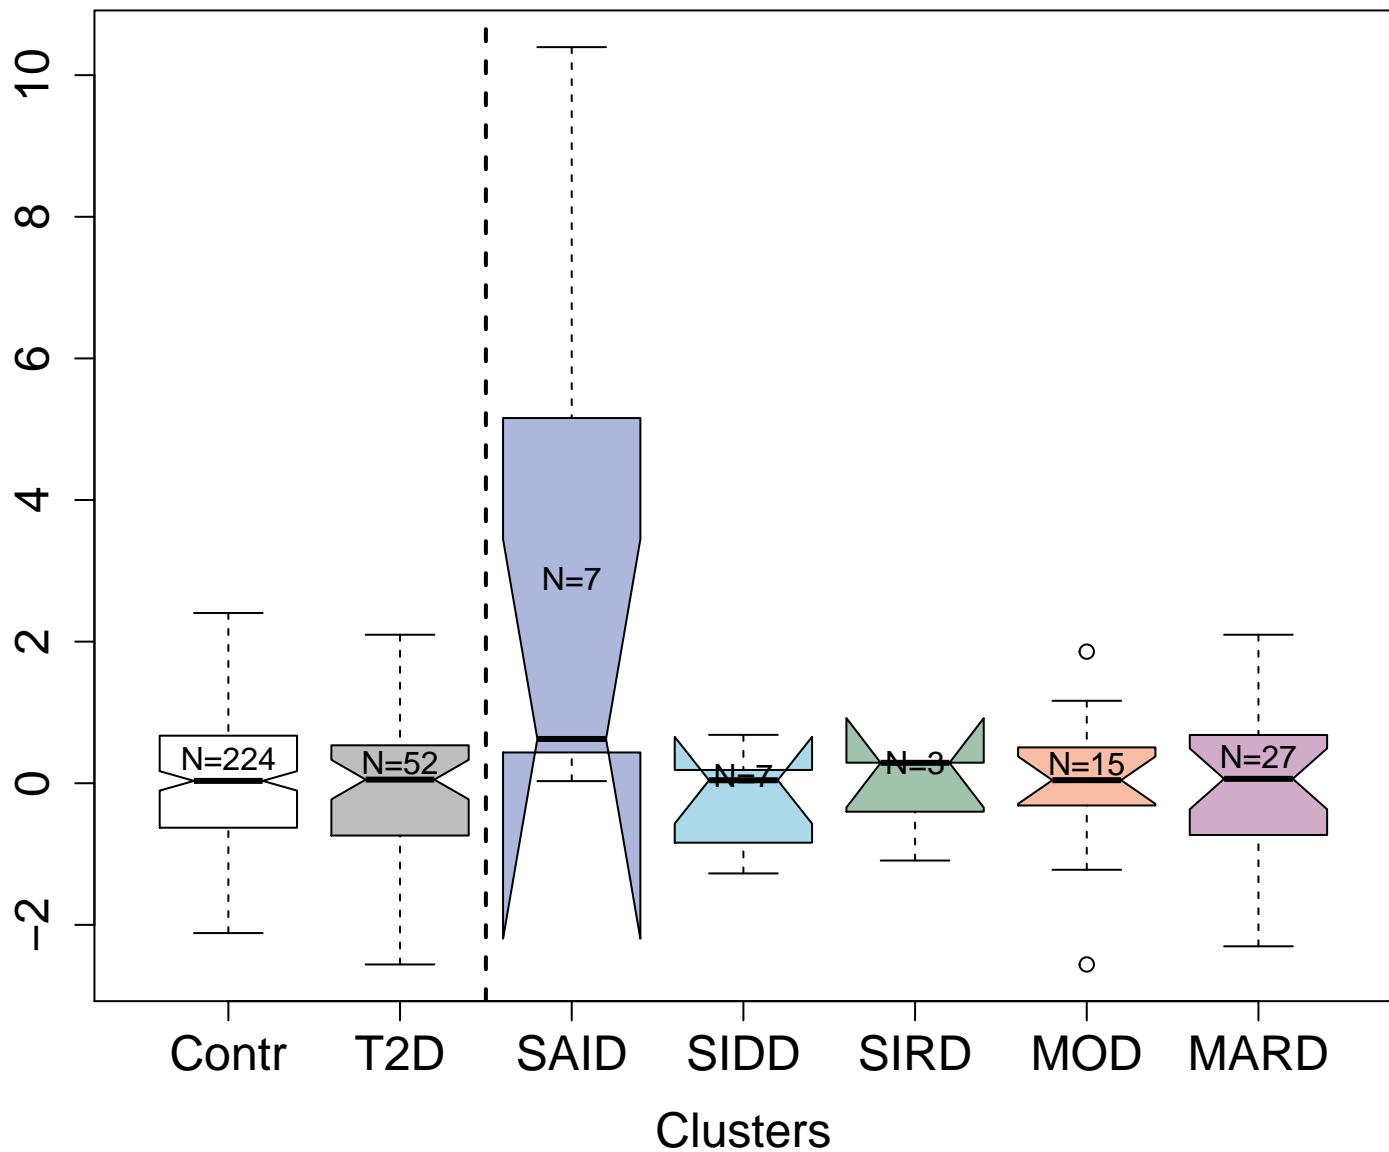

M47917 : X - 12306

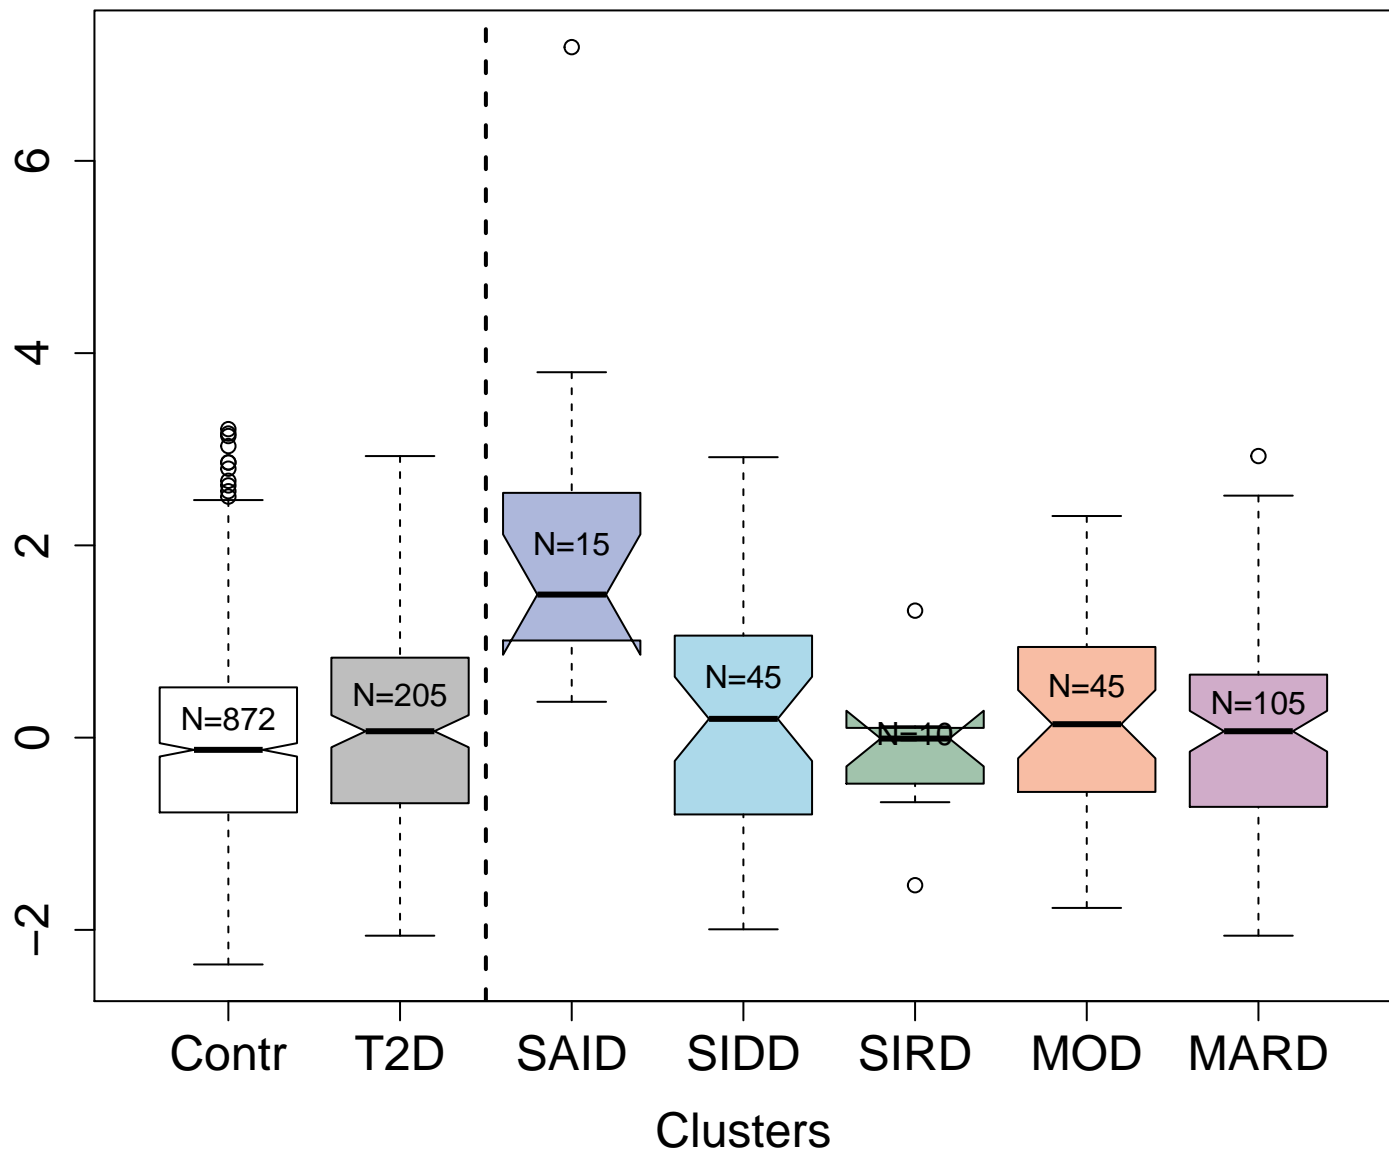

M37475 : 4-acetaminophen sulfate

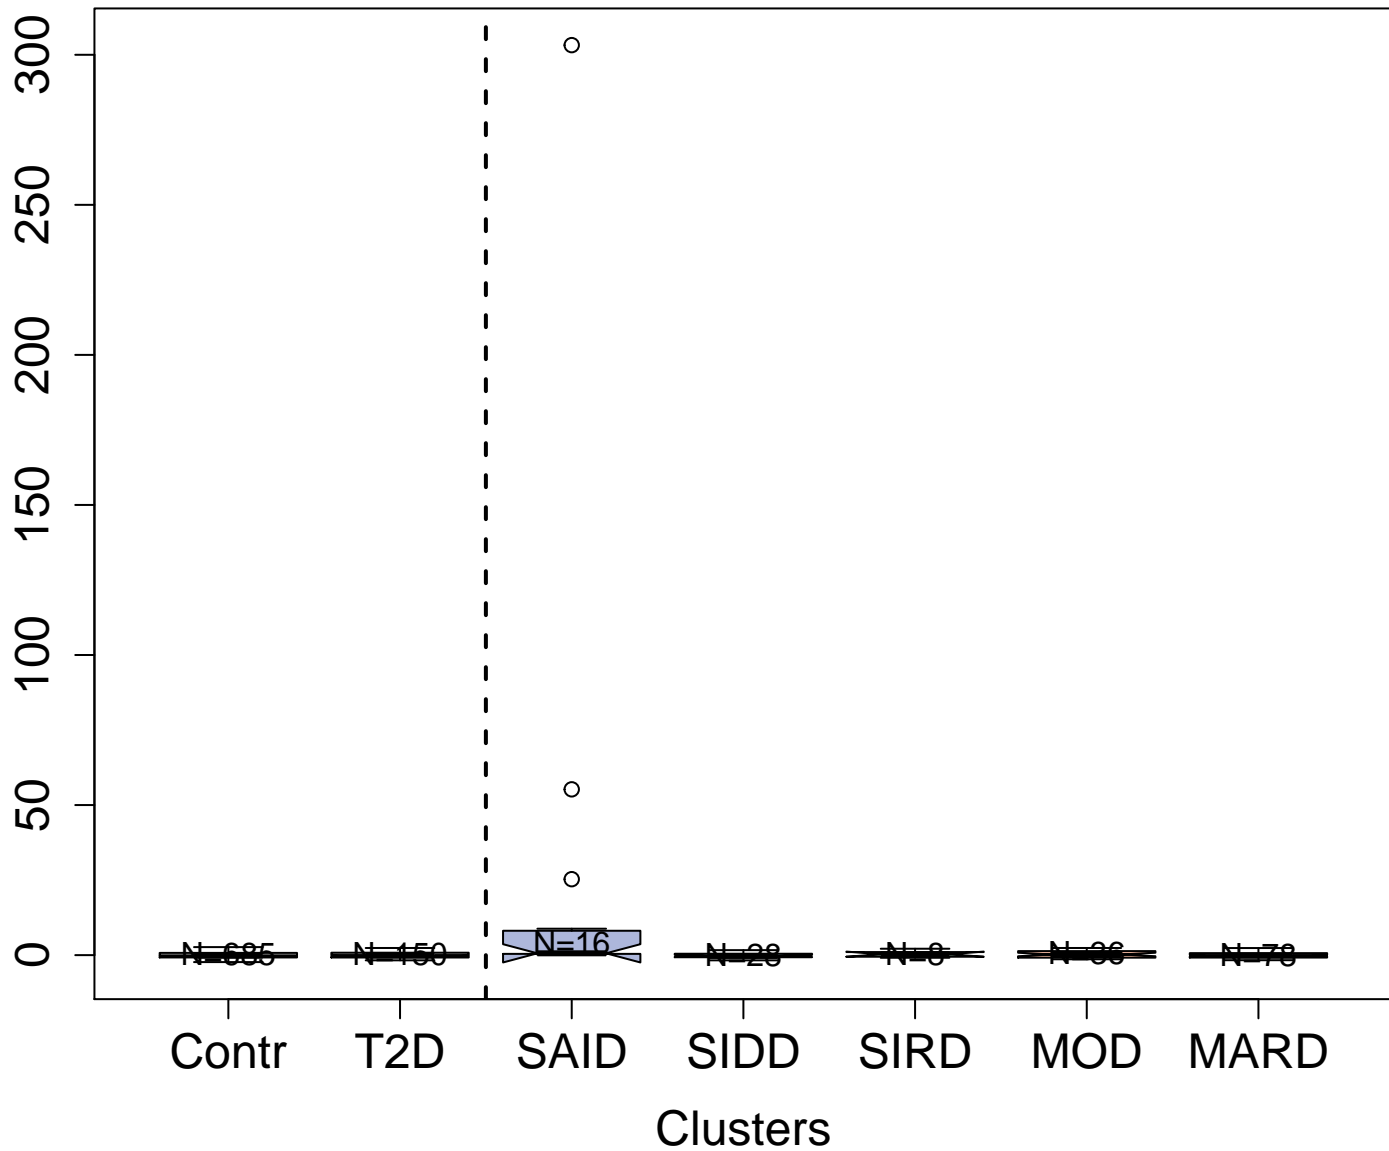

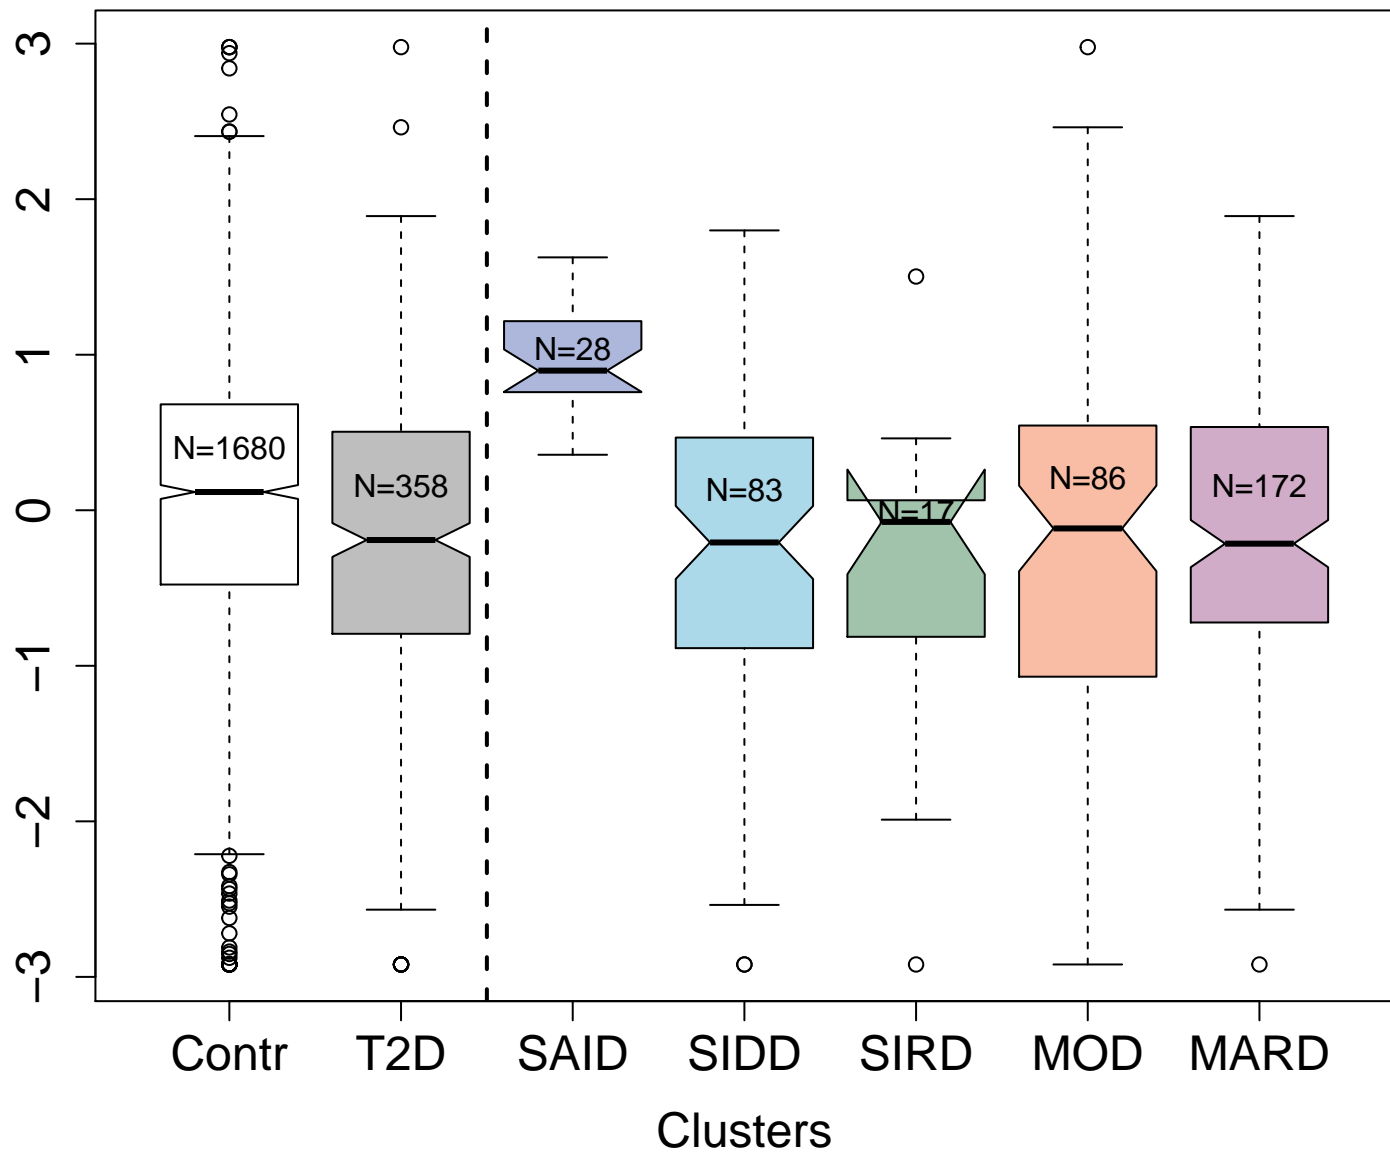



M32698 : X - 11381

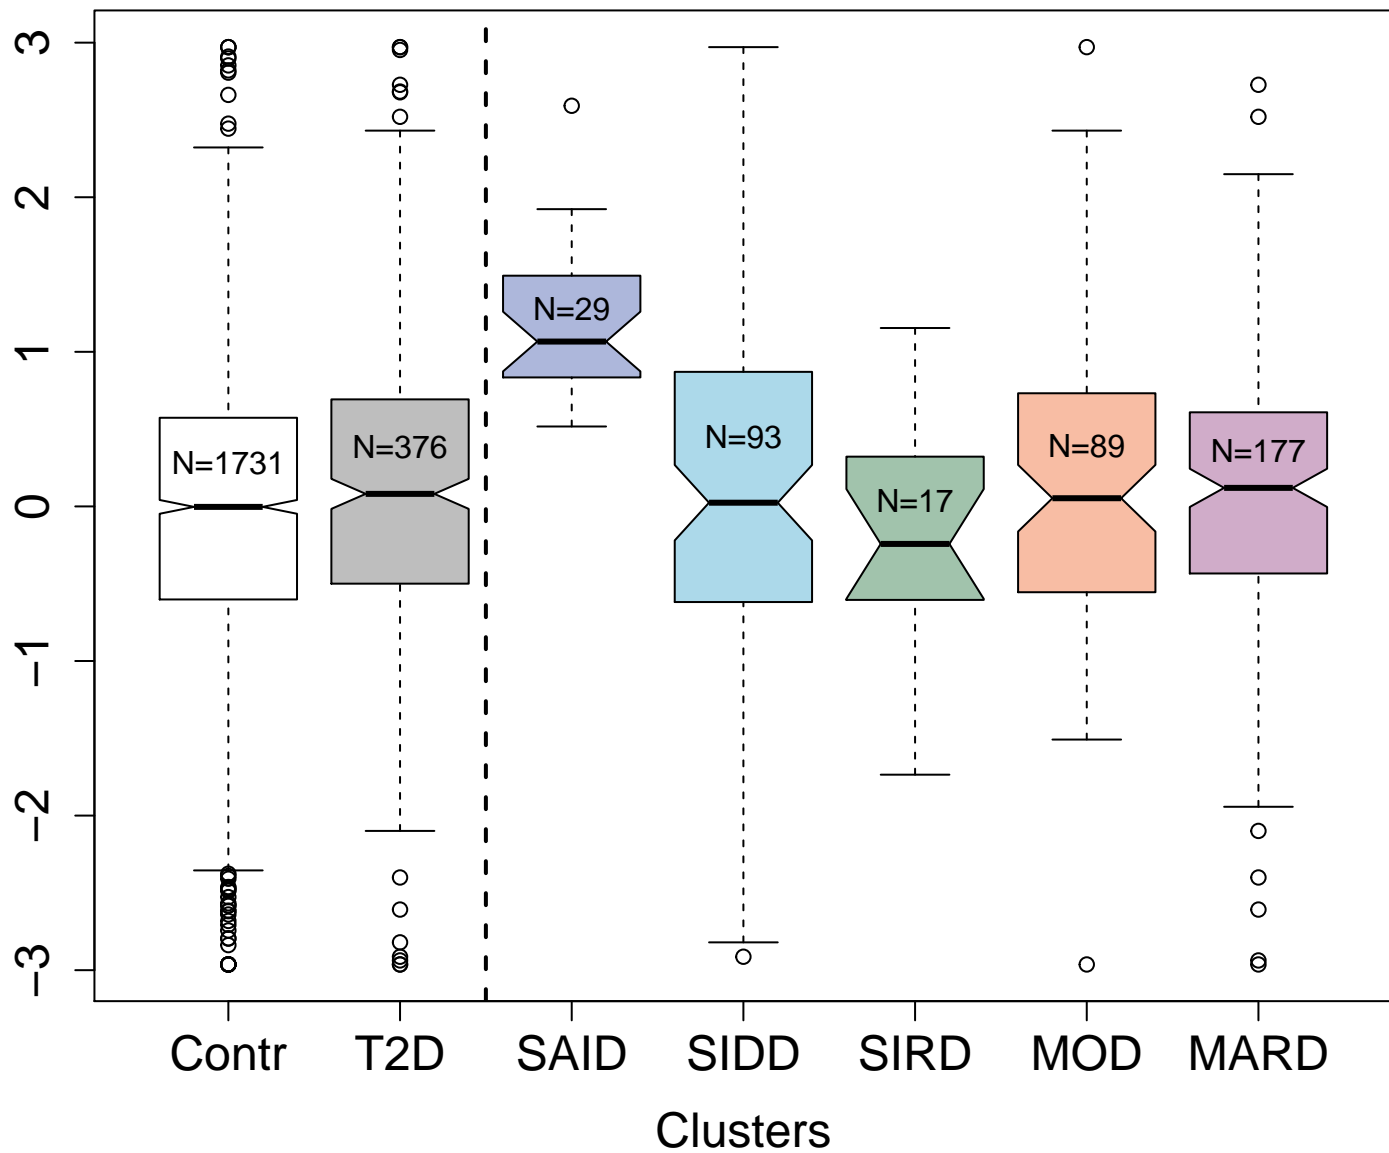

M48019 : X - 17655

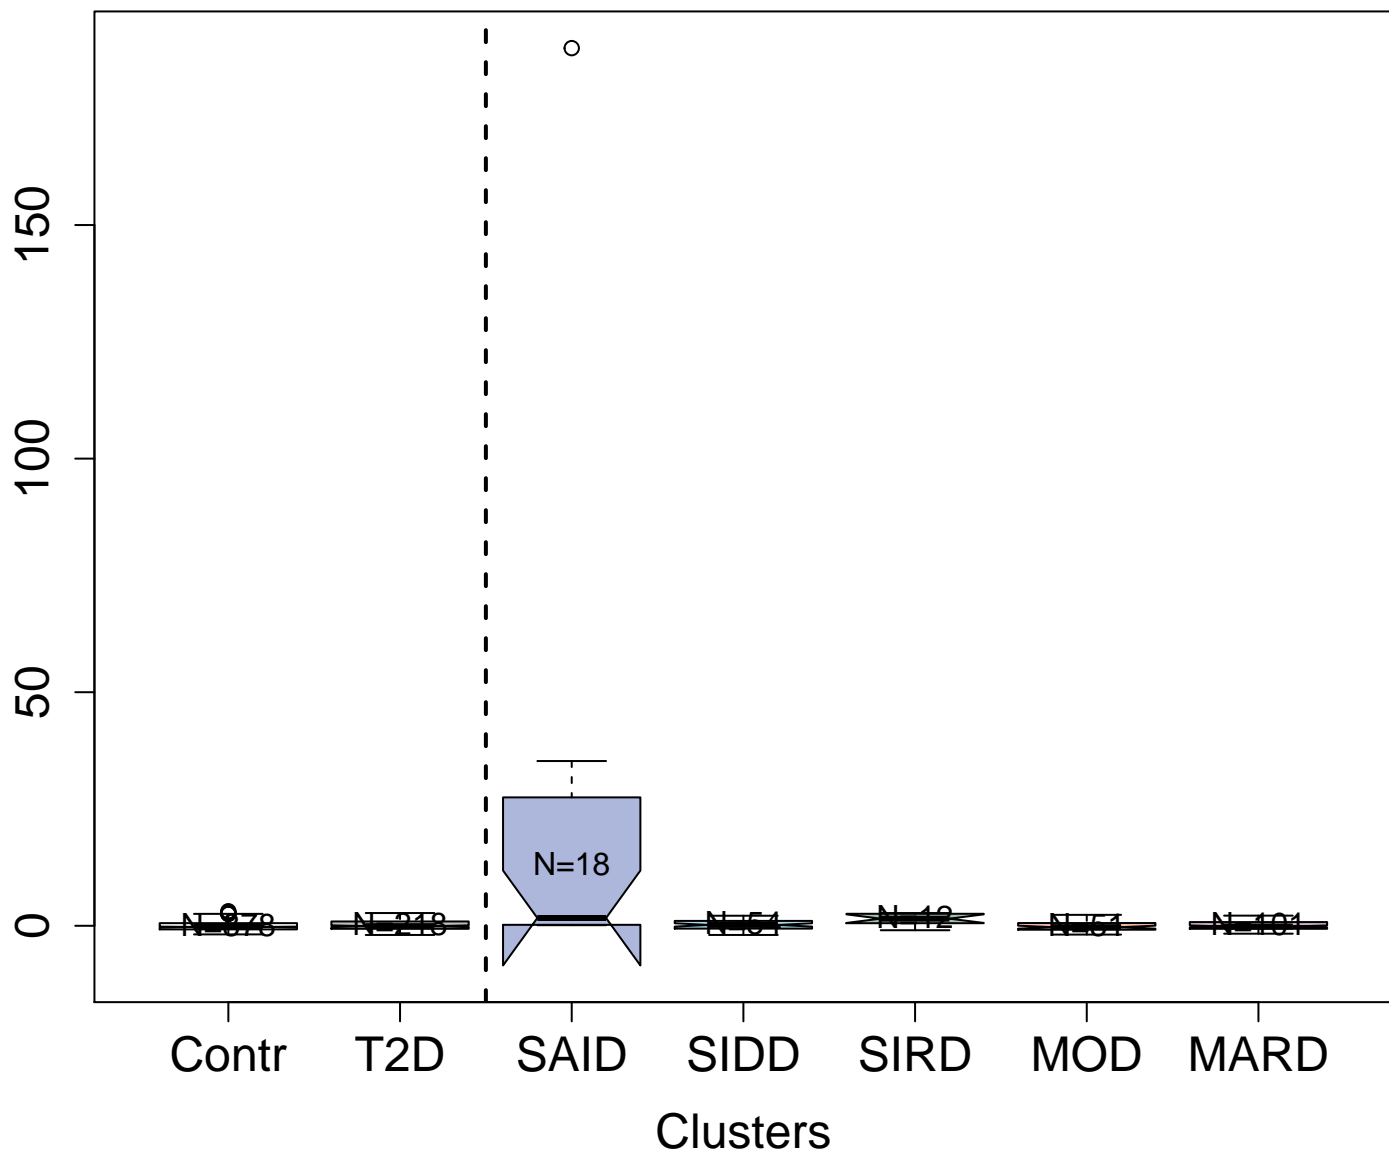

M47670 : X - 18899

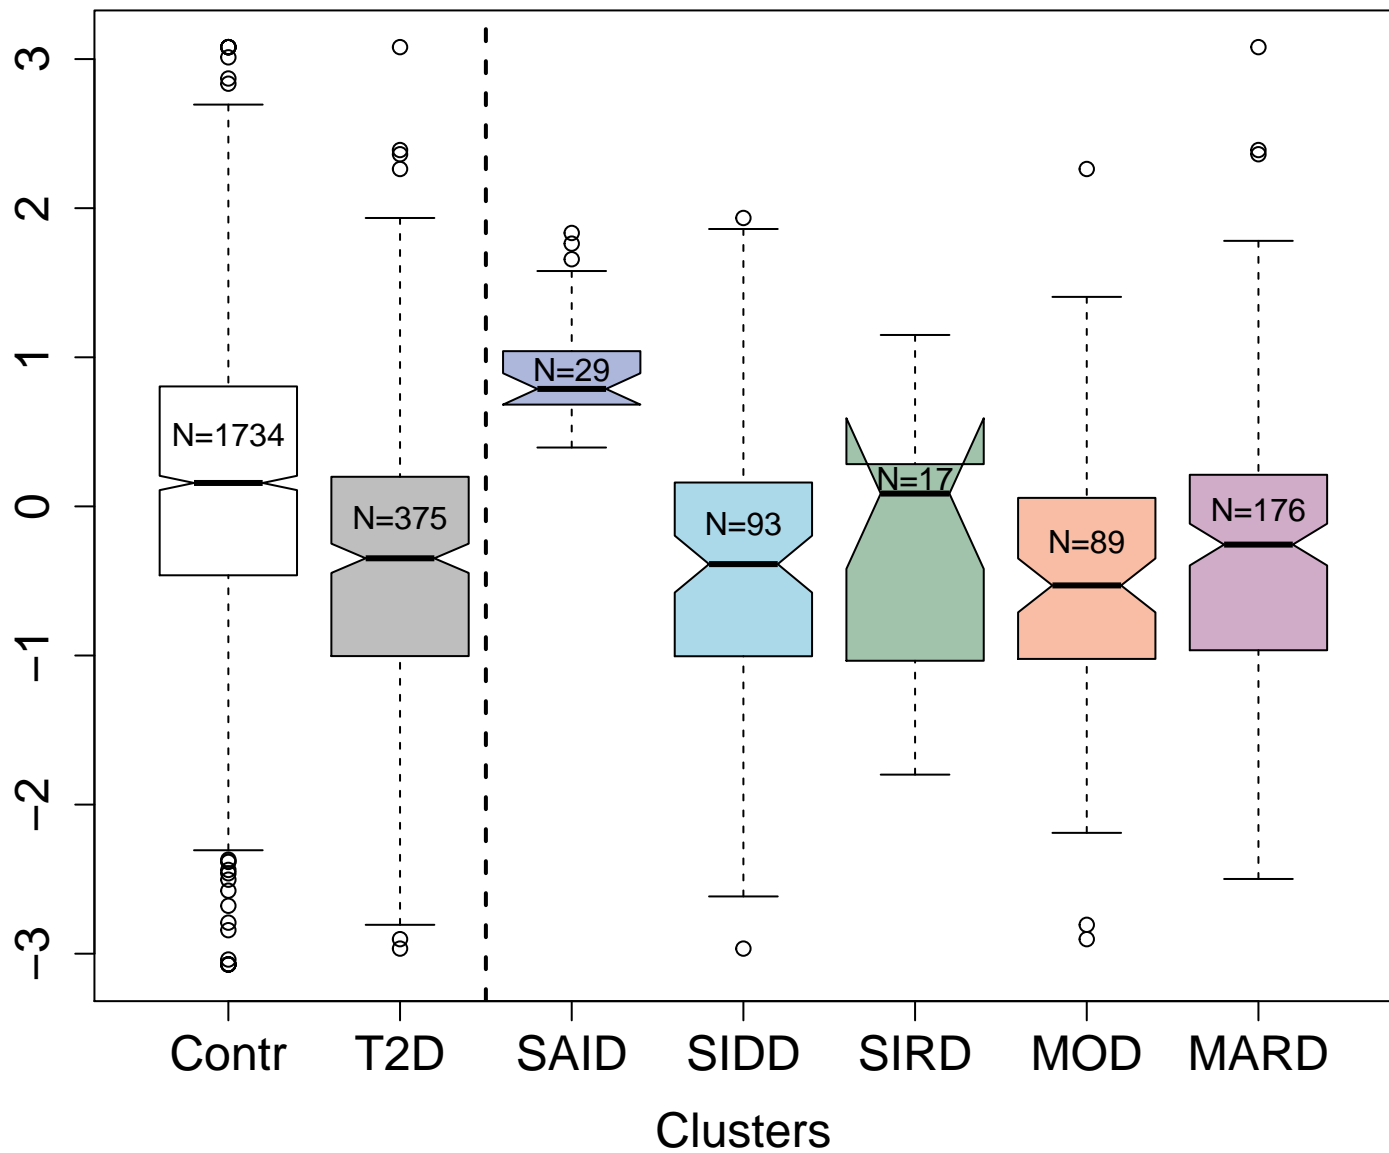

M46515 : X - 21470

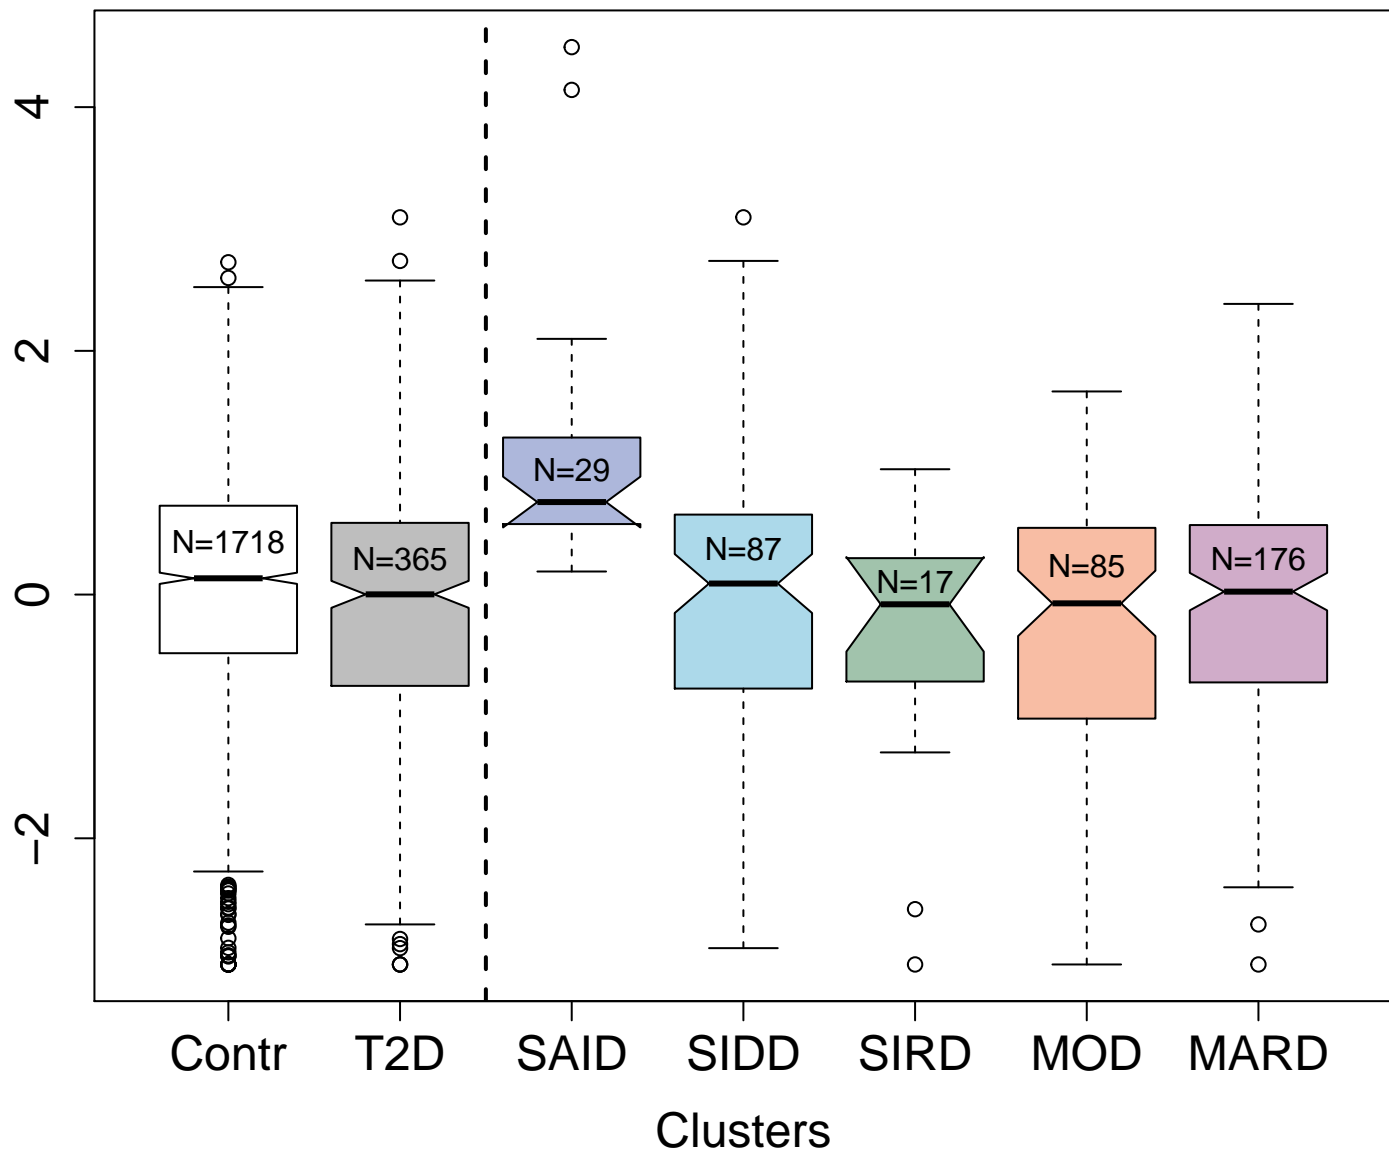

M46548 : 3-methylglutaryl/carnitine (2)

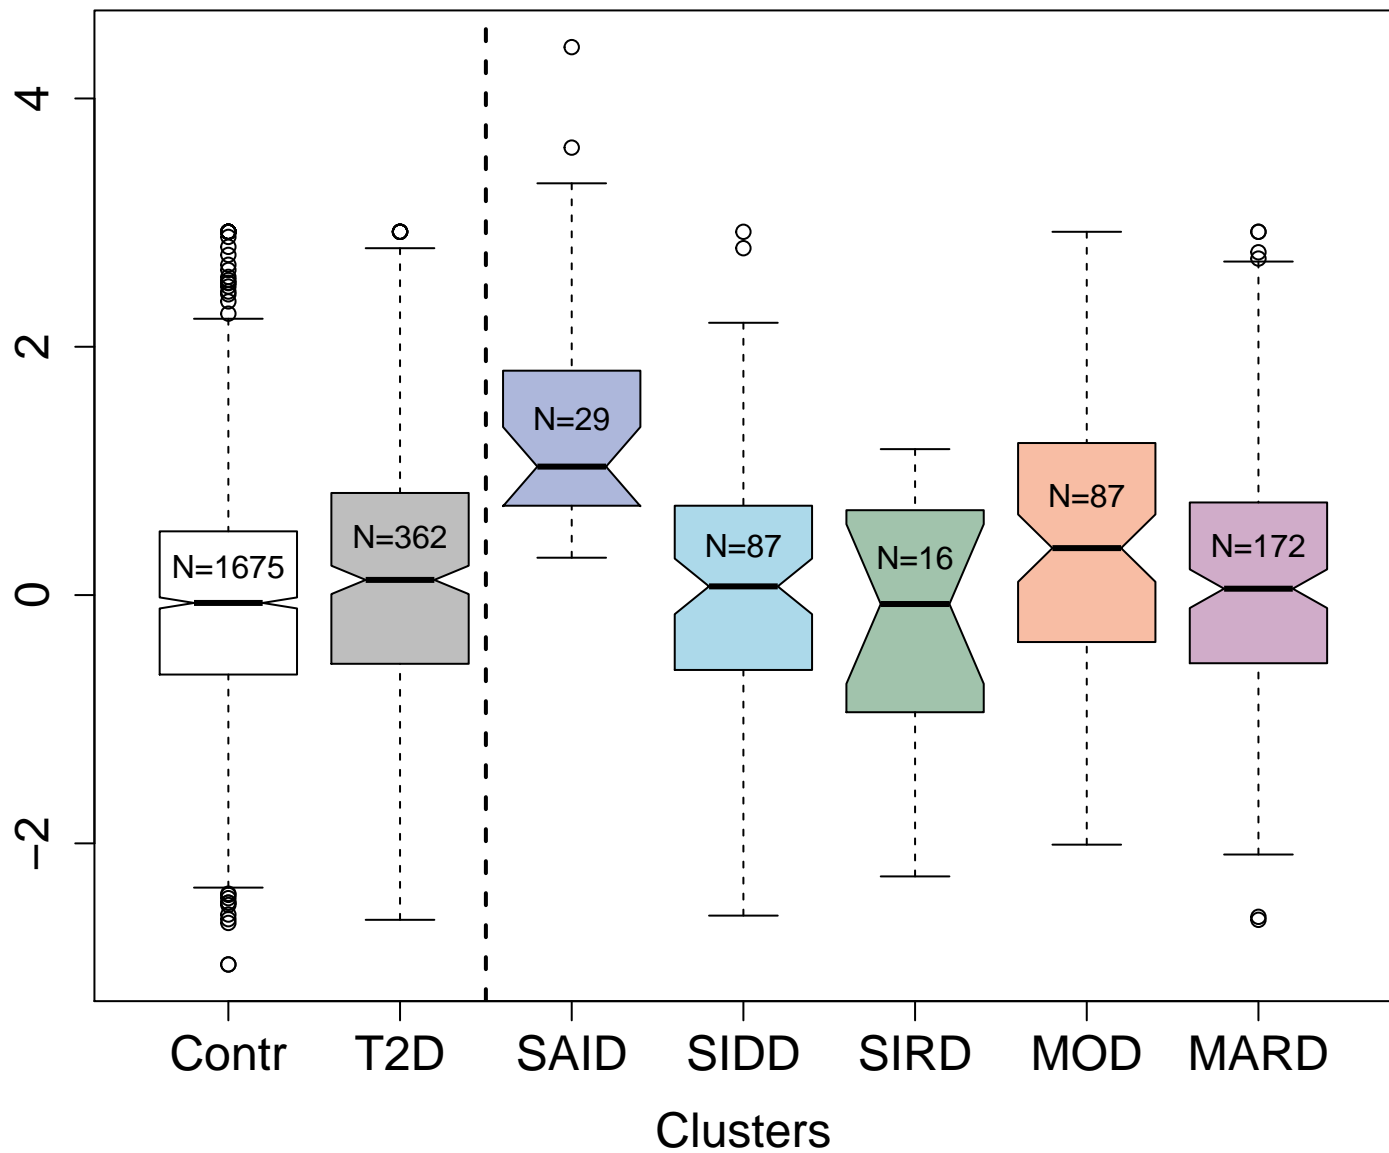

M37190 : 5alpha-androstan-3beta,17beta-diol disulfate

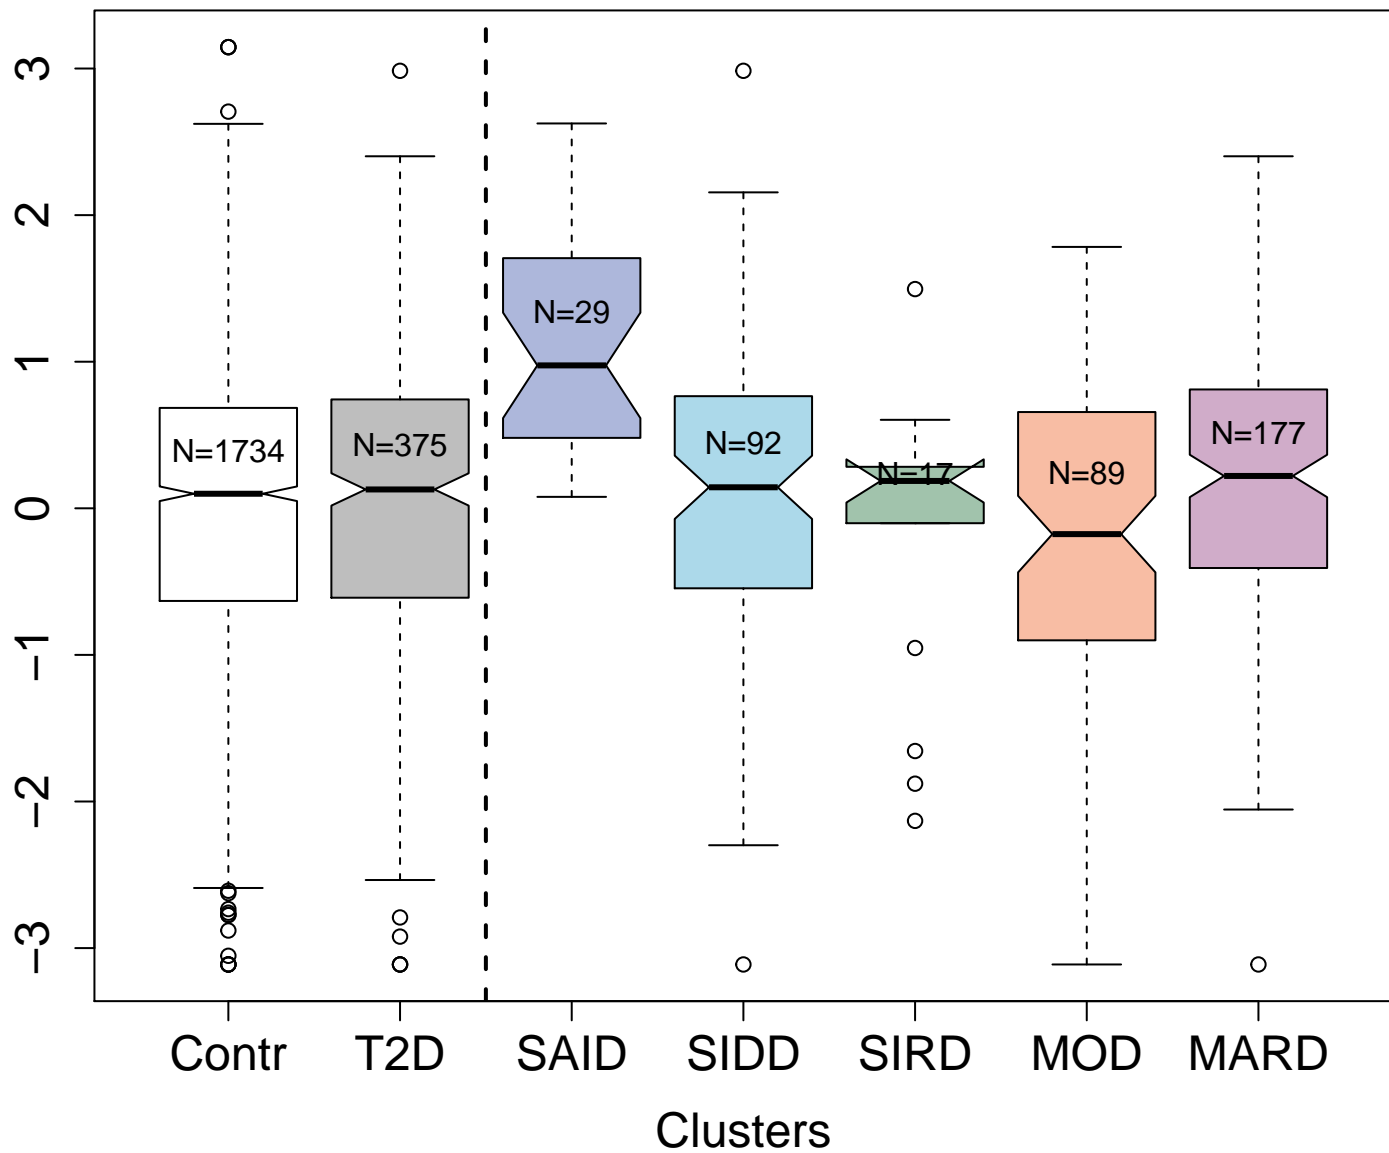

M1591 : N-acetylvaline

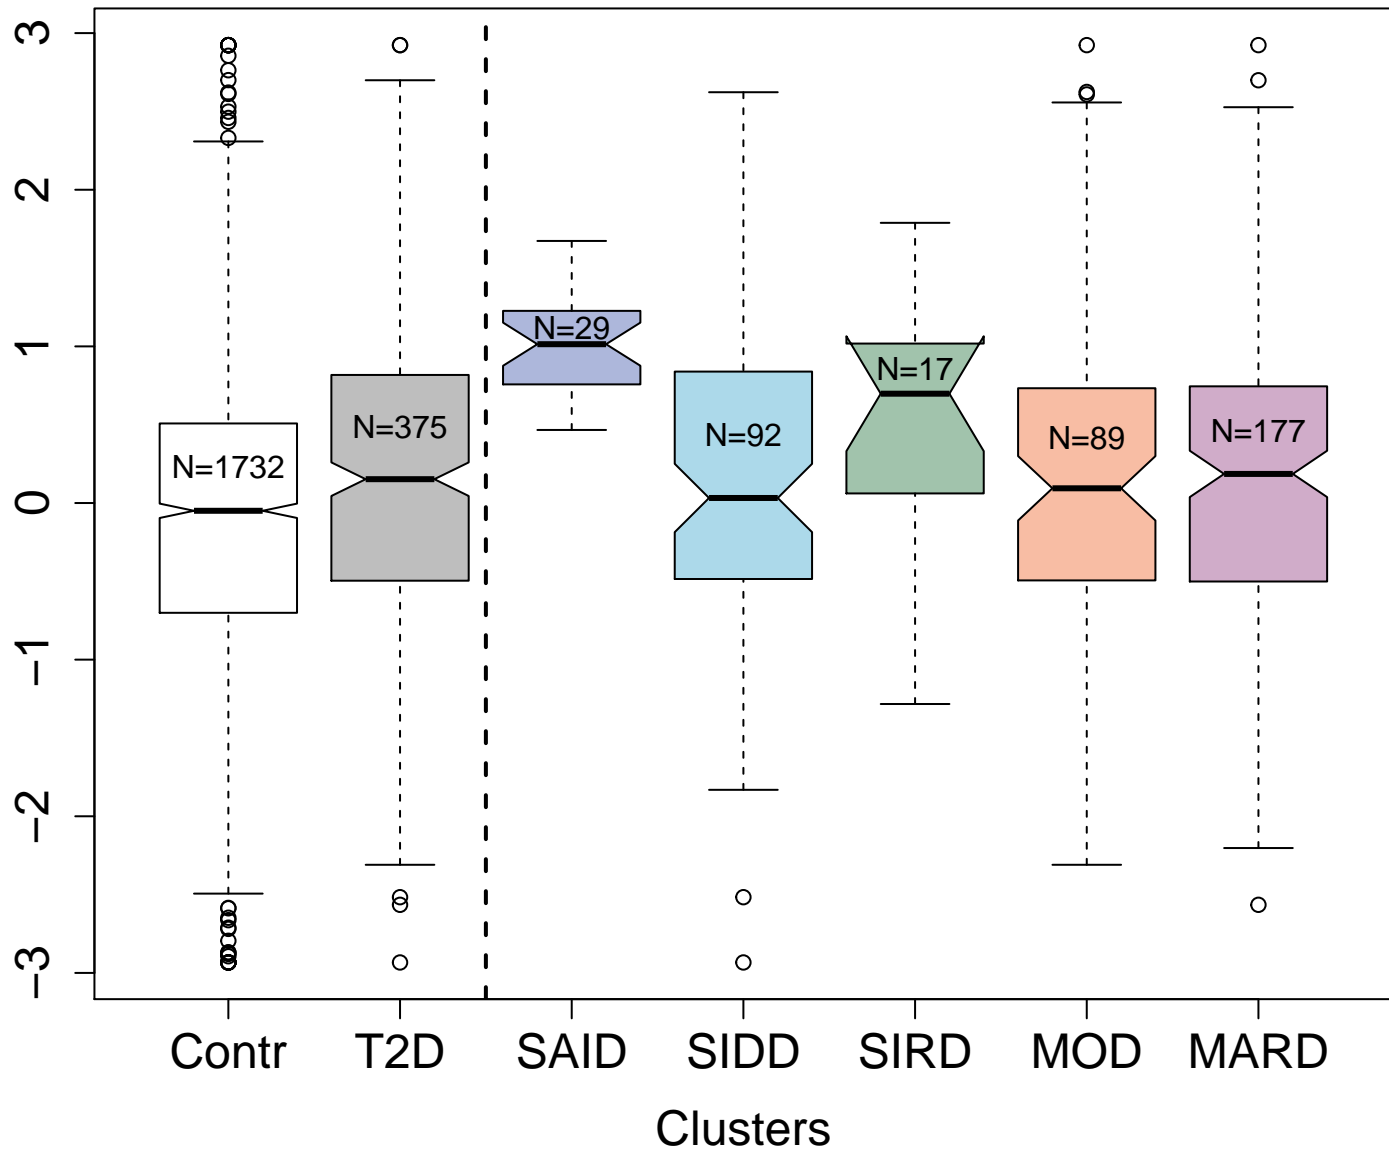

M18349 : indolelactate

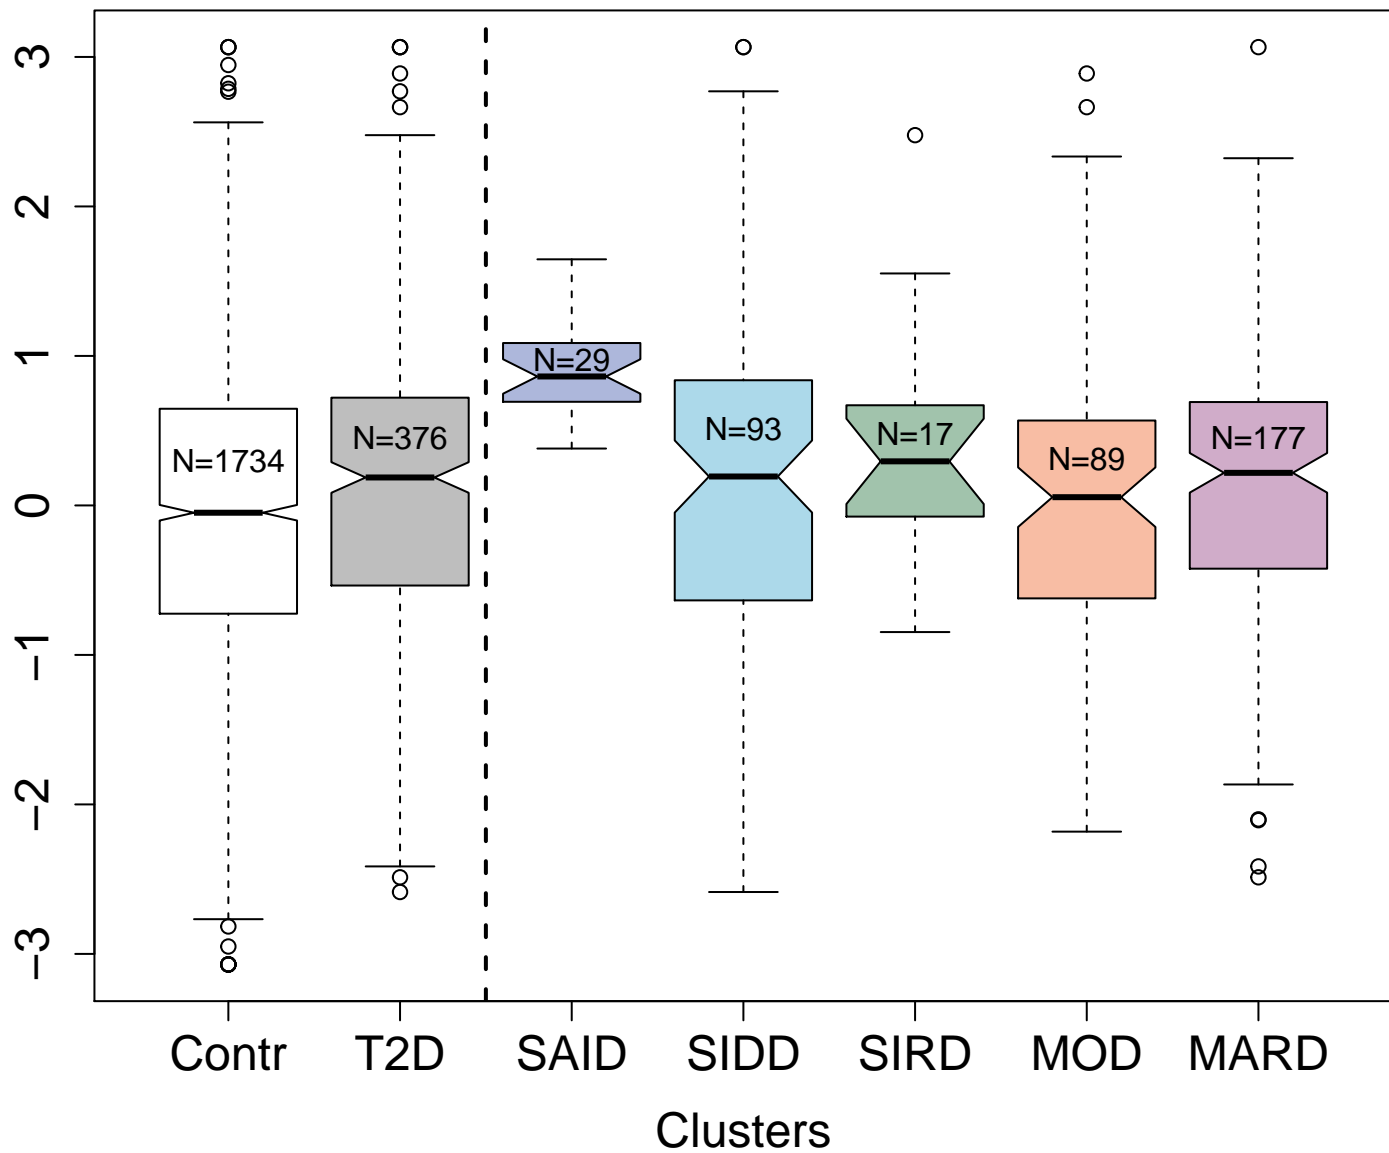



M57416 : N-palmitoyl-sphingadienine (d18:2/16:0)\*

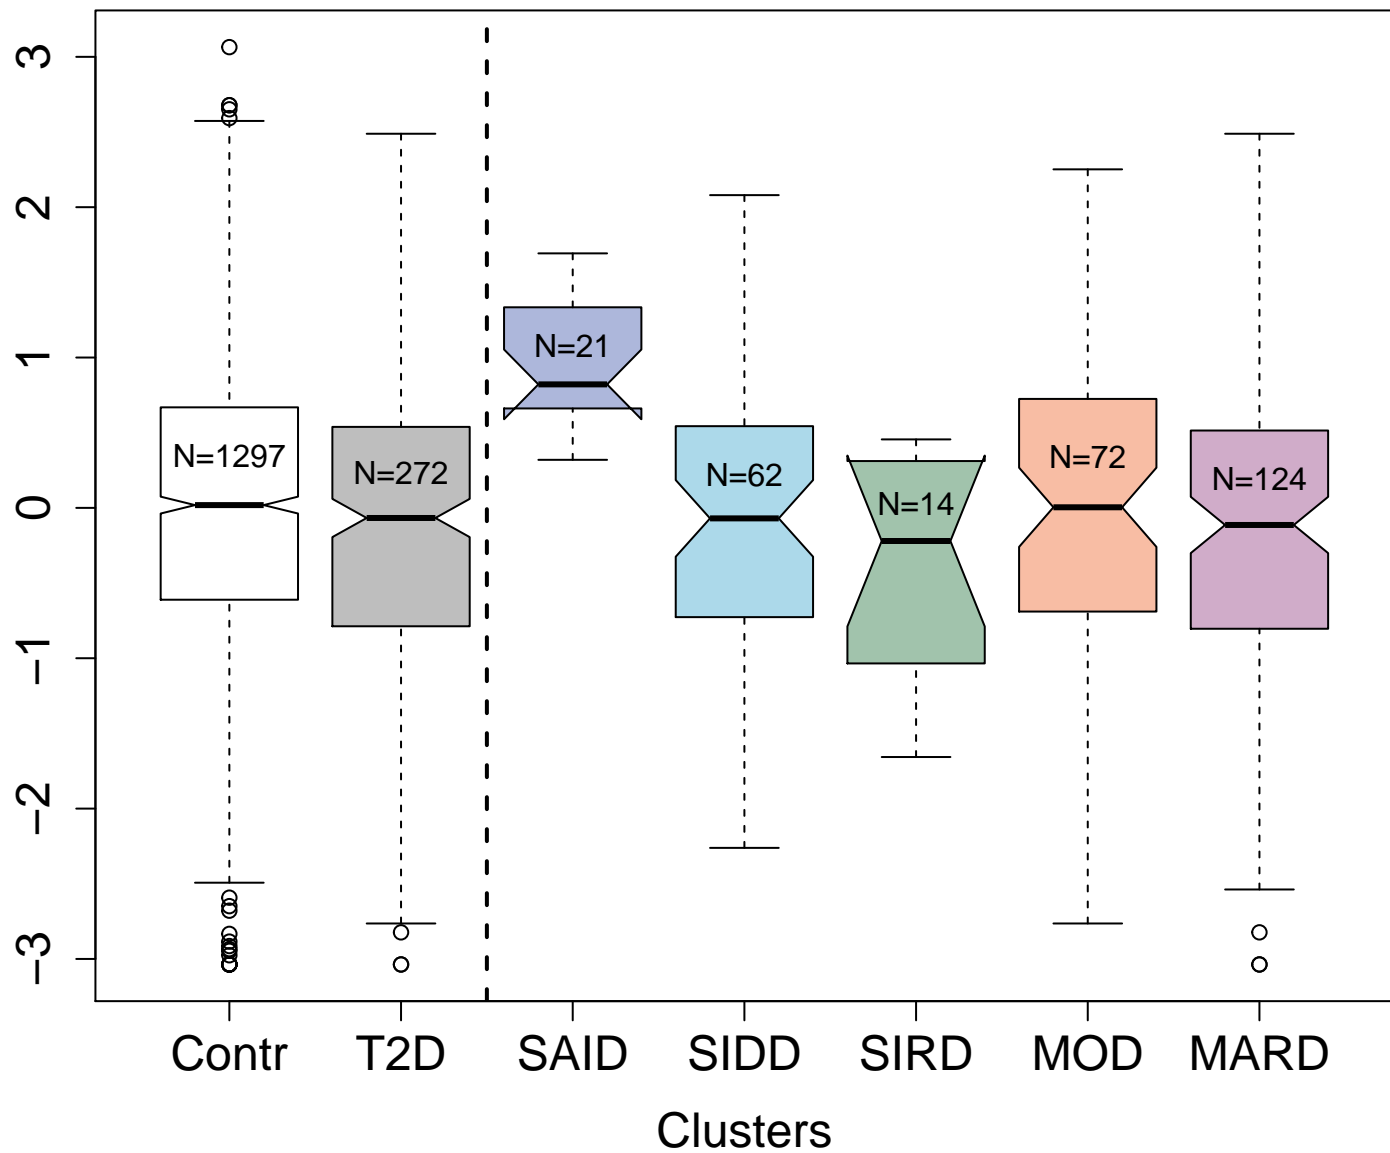

M22842 : cholate

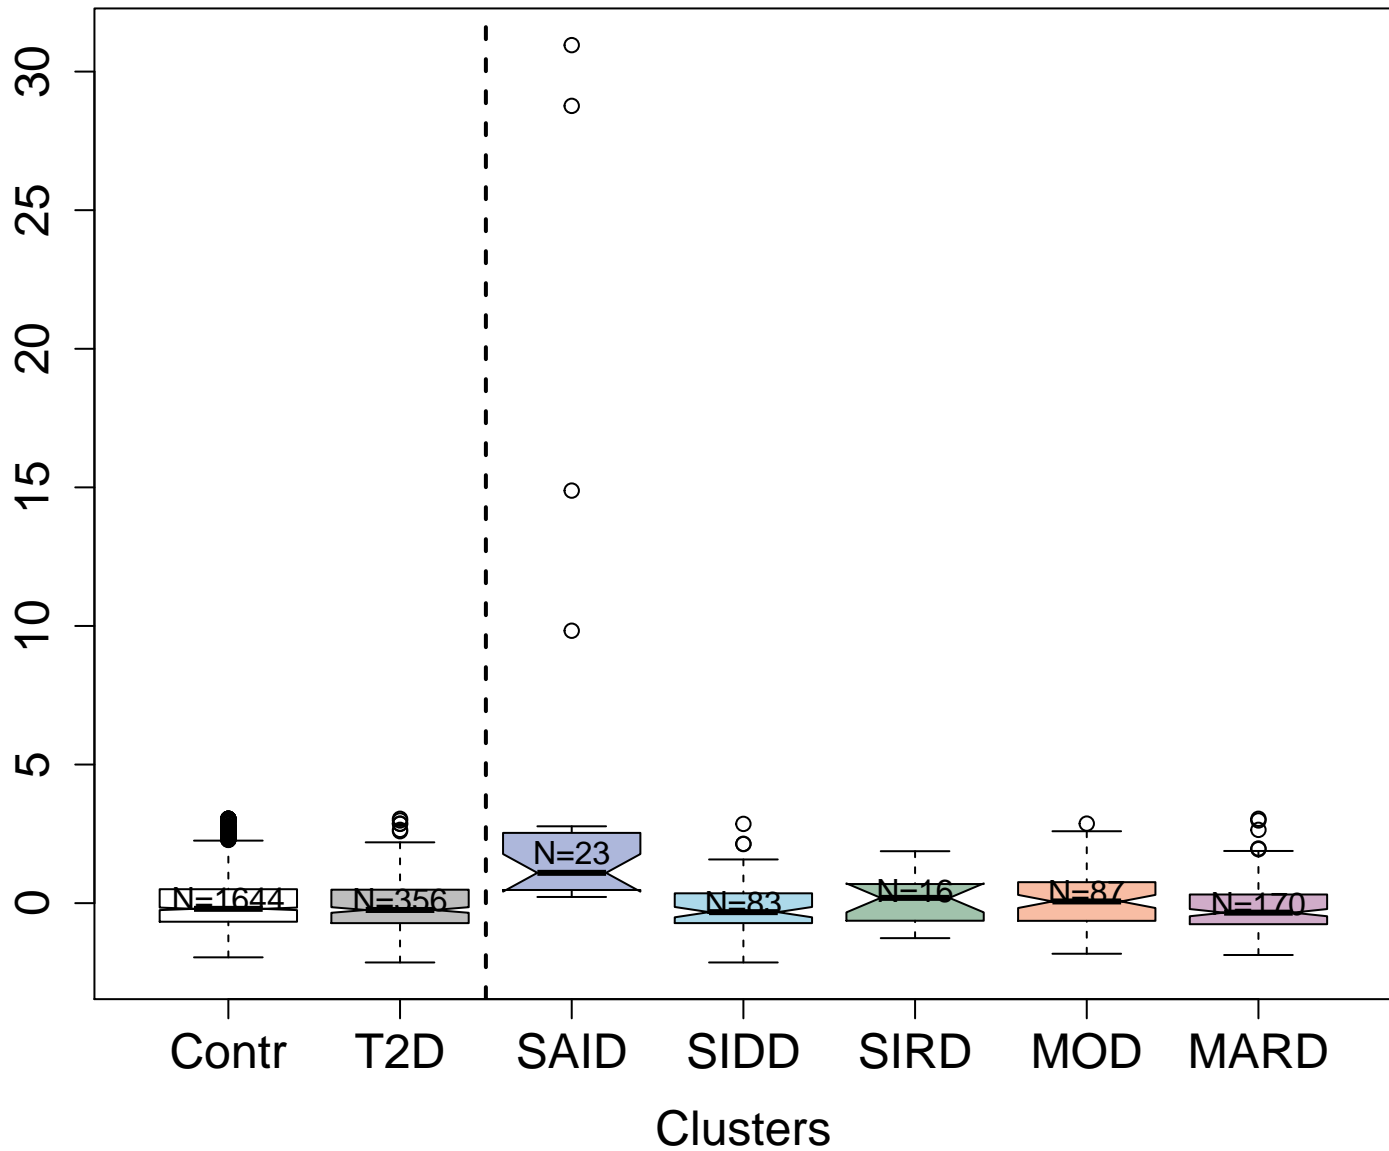

M48490 : sphingomyelin (d18:1/20:0, d16:1/22:0)\*

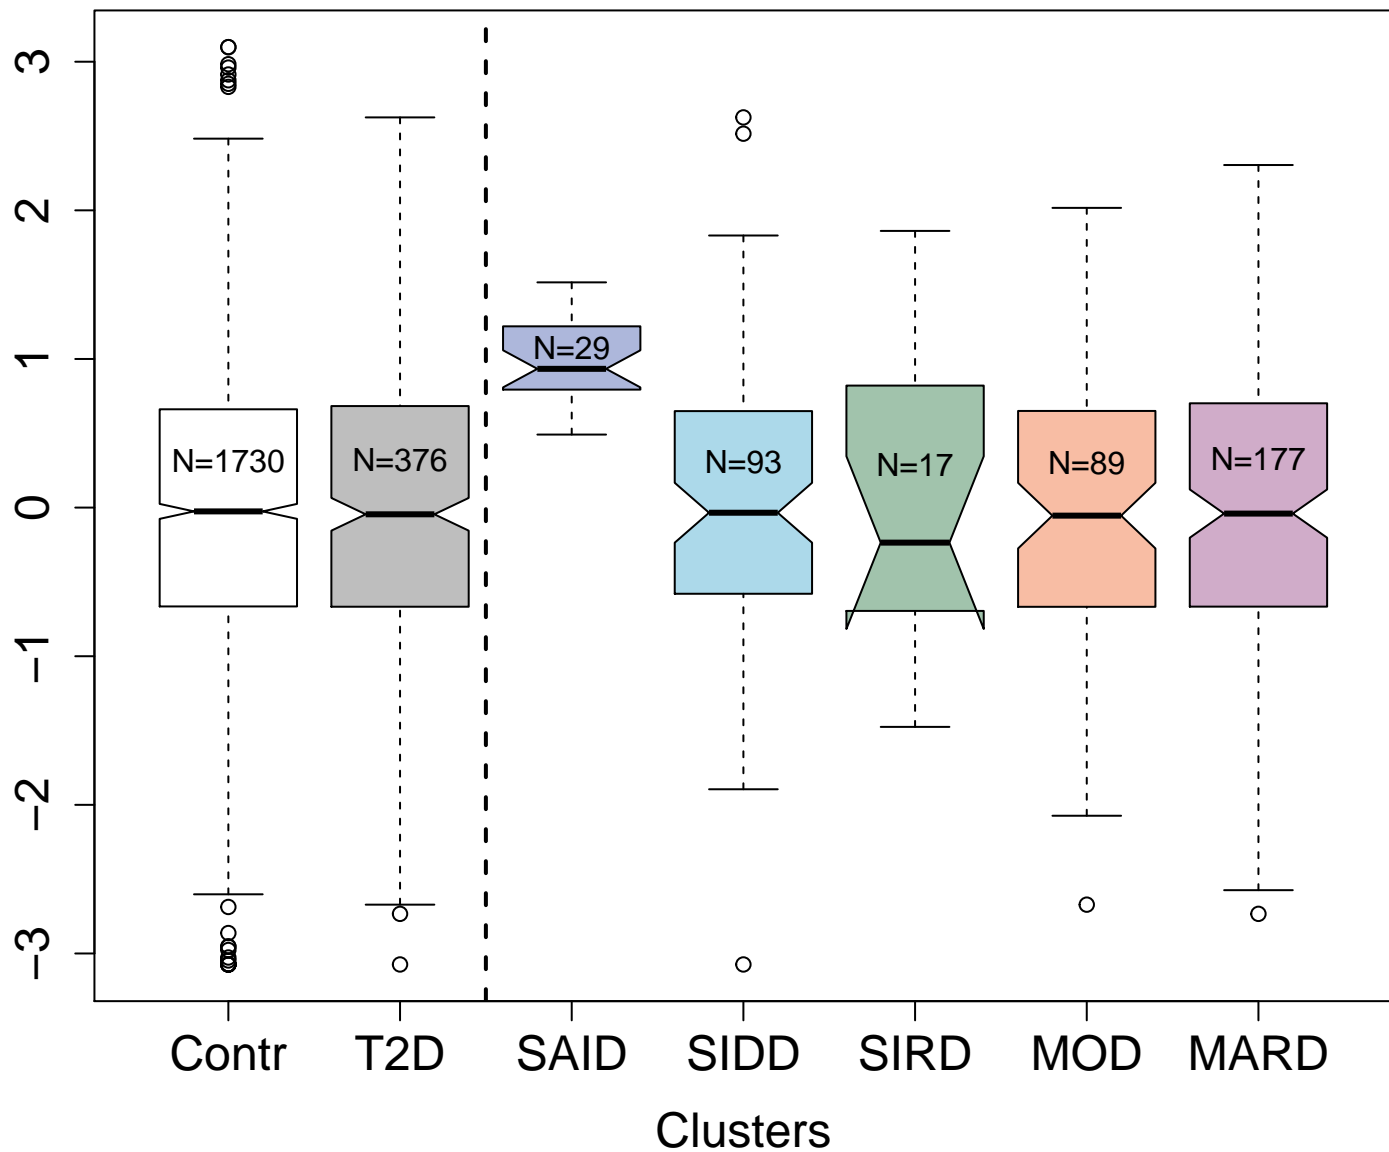

M37480 : 5alpha-pregnan-3beta-ol,20-one sulfate

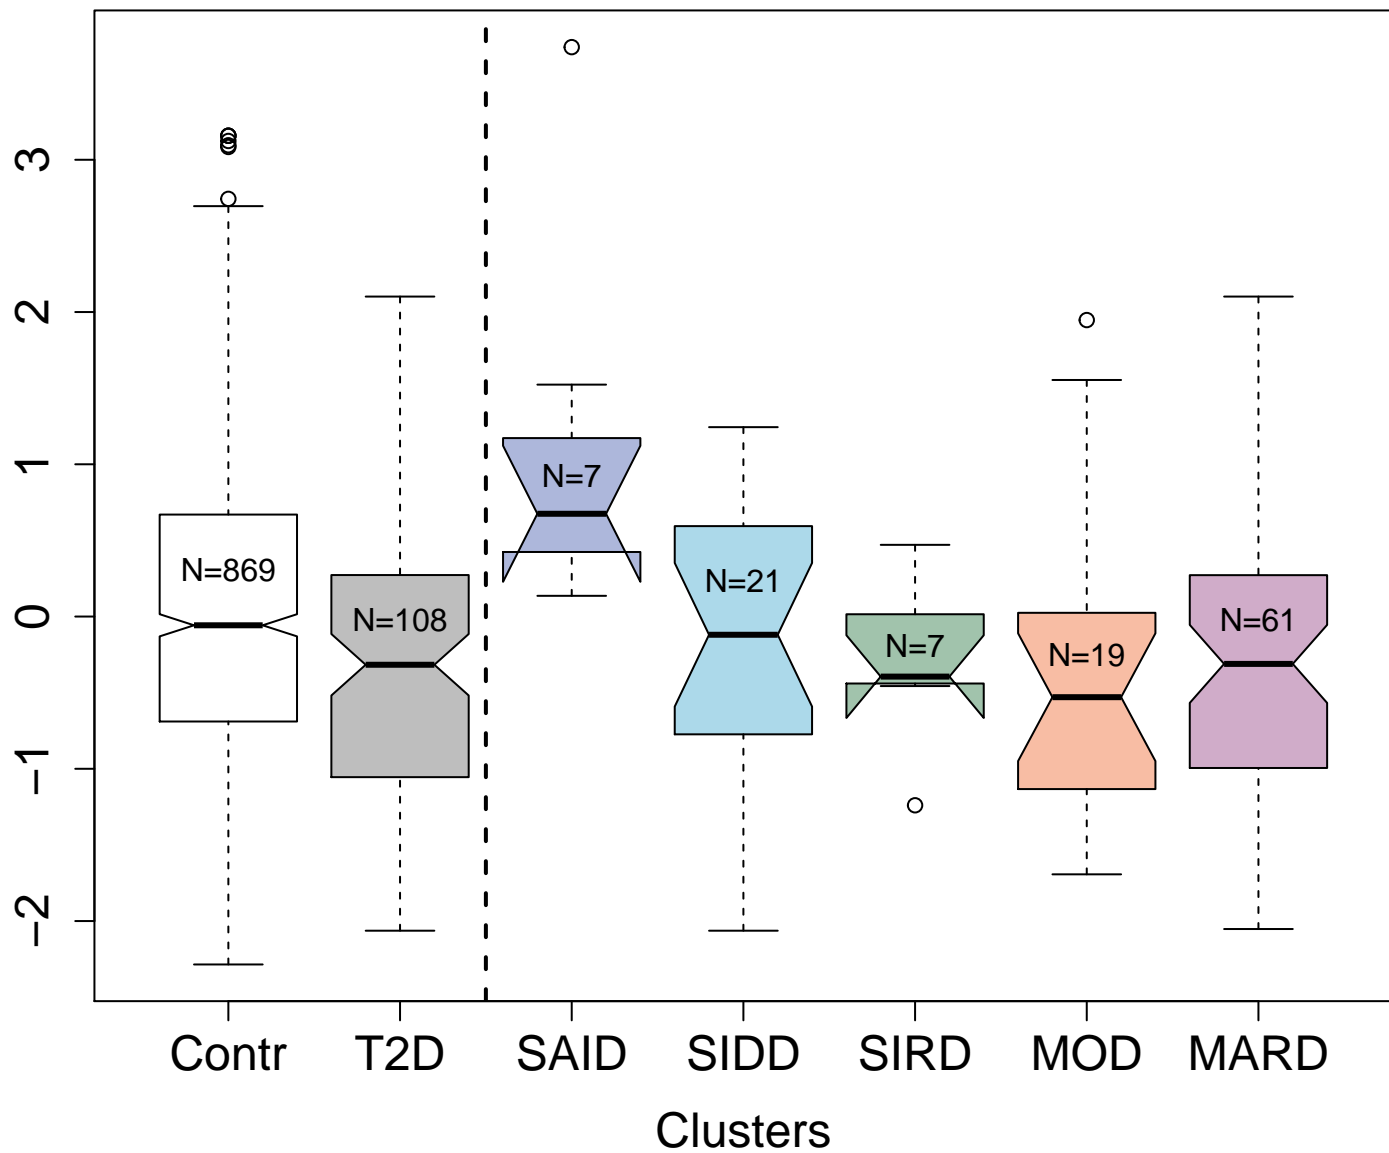

M1584 : methyl indole-3-acetate

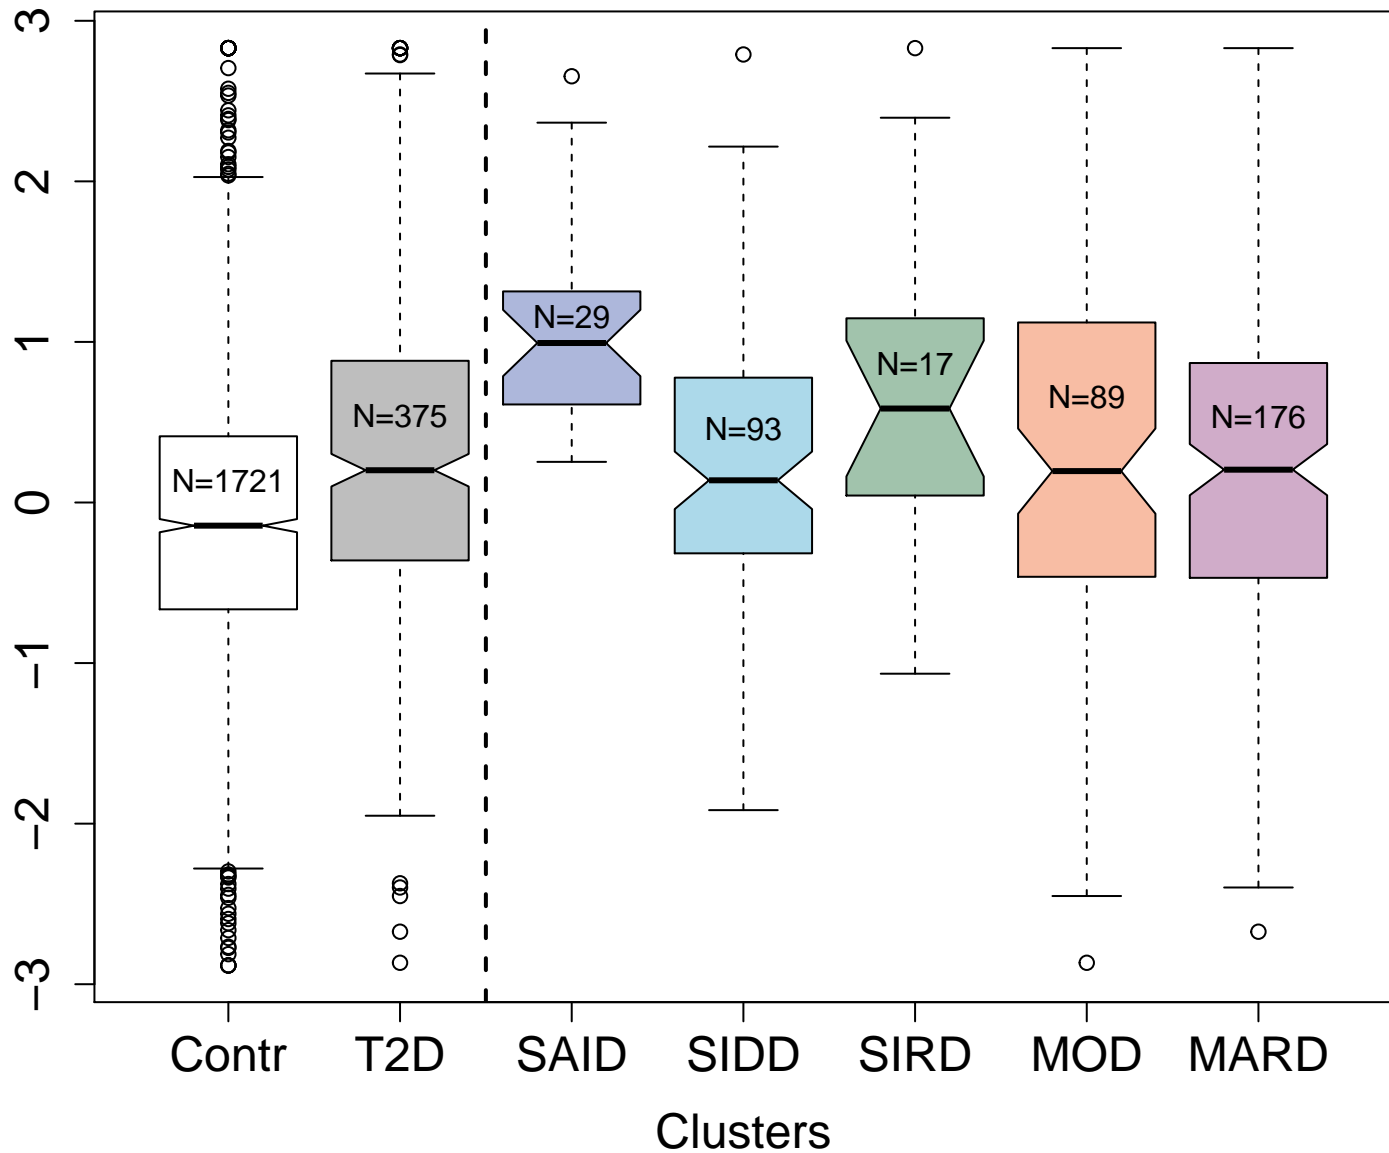

M43239 : S-allylcysteine

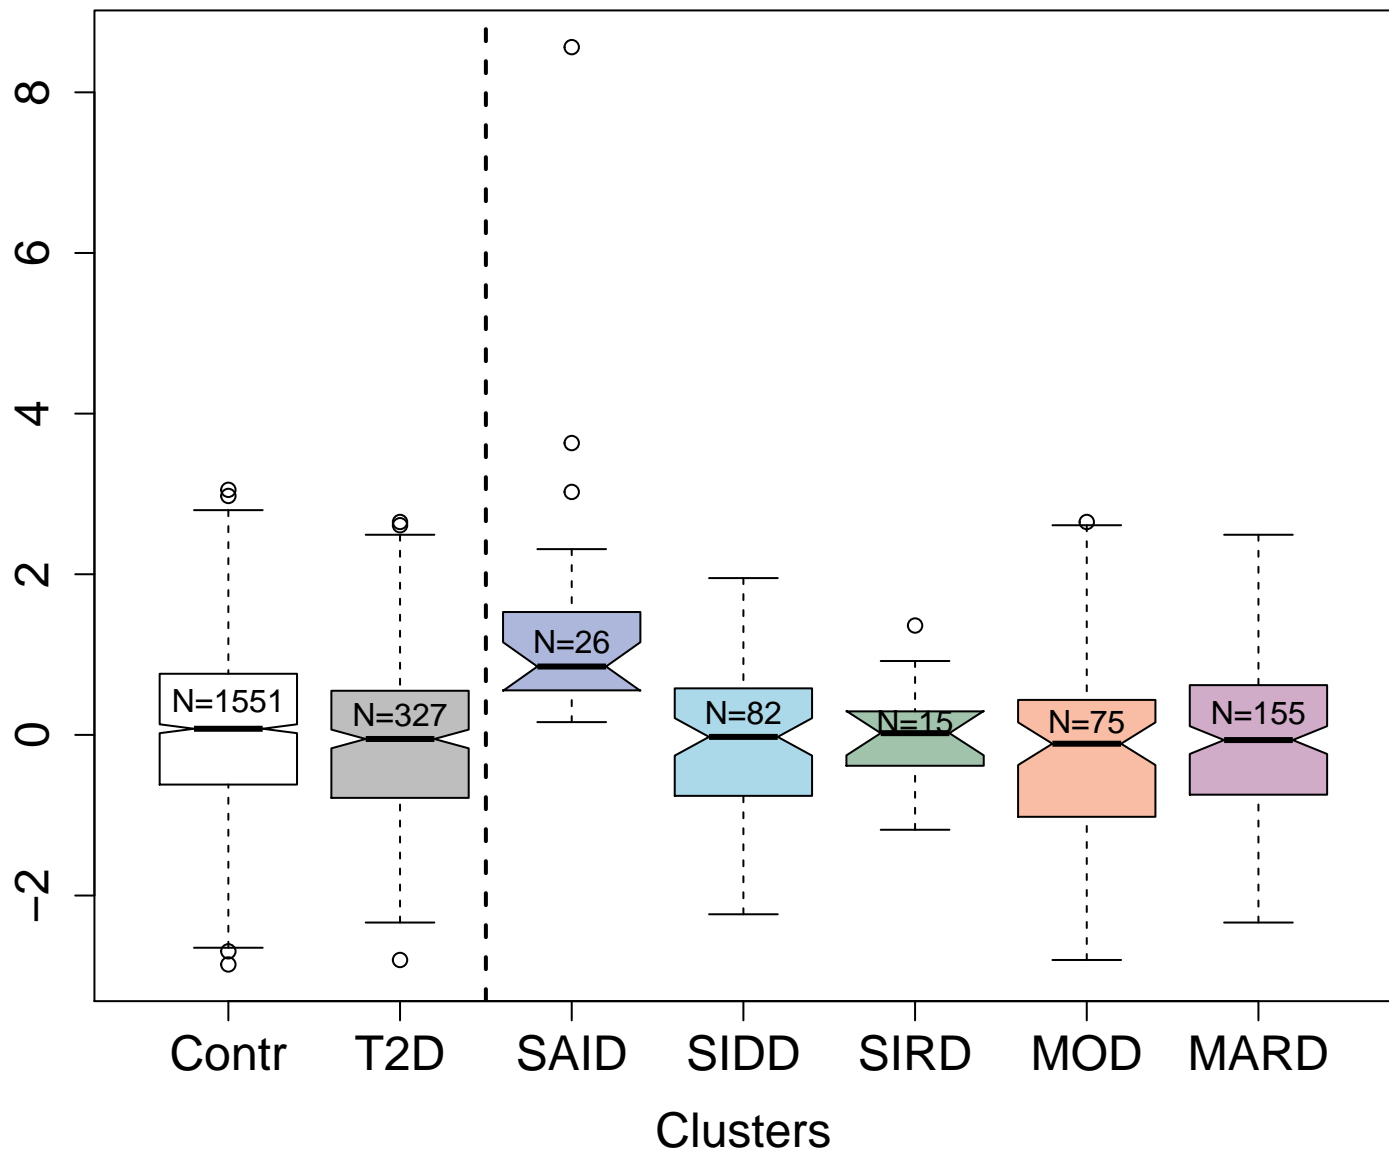

M34109 : metoprolol acid metabolite\*

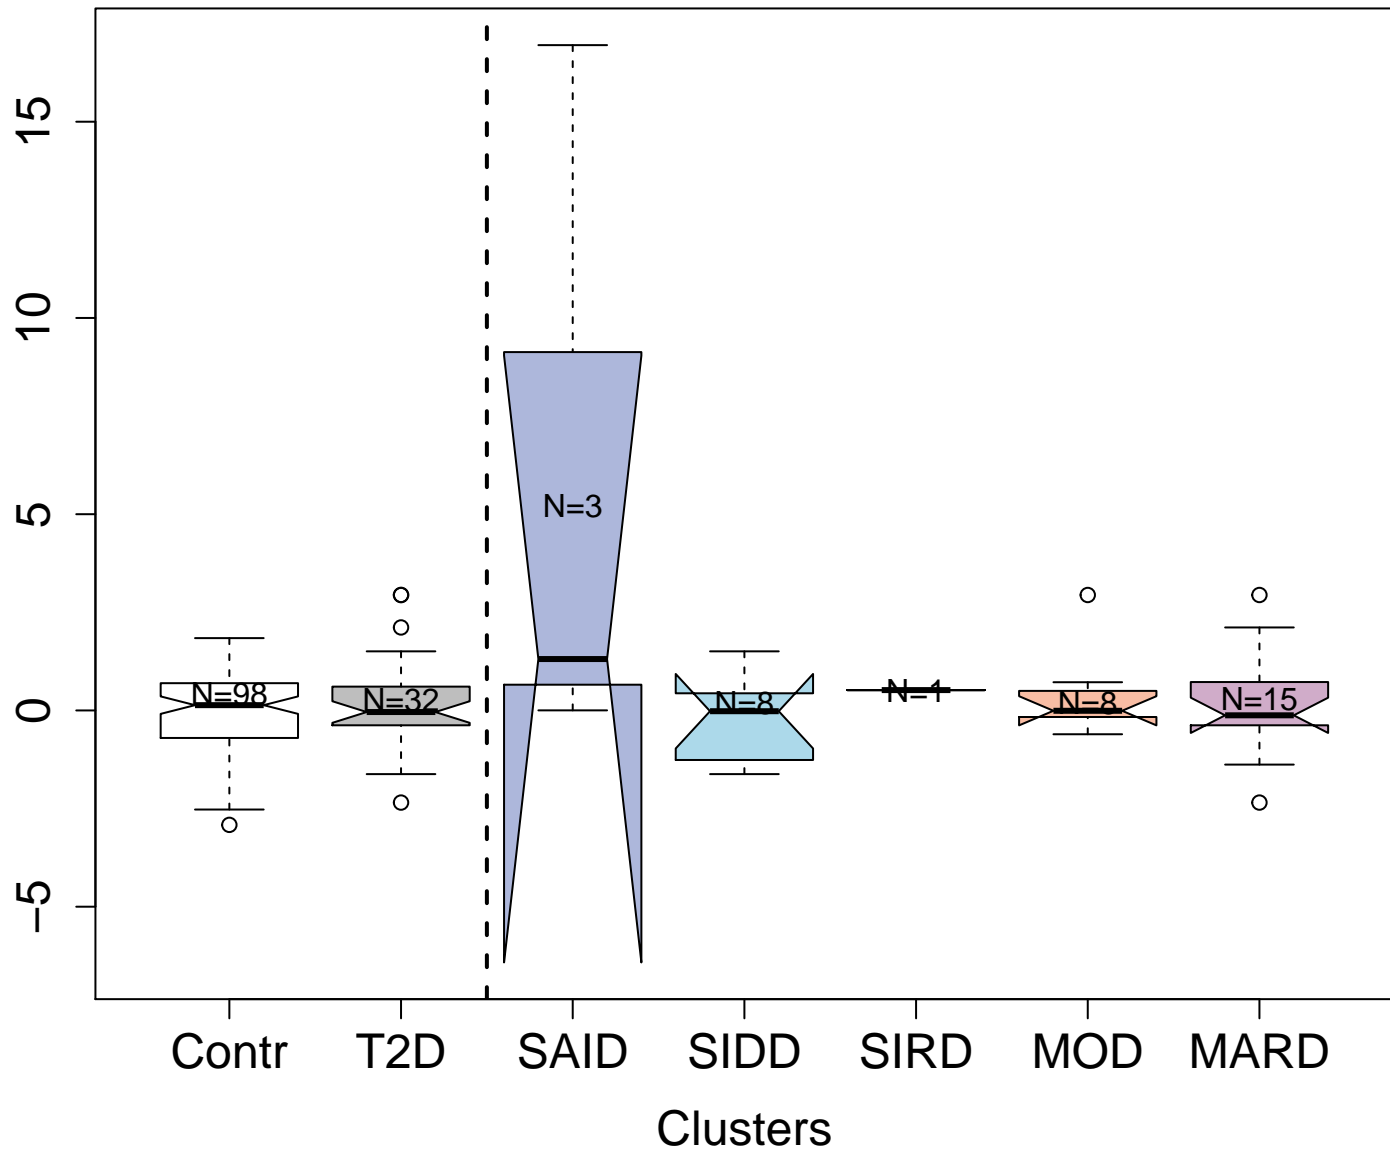

M57591 : beta-cryptoxanthin

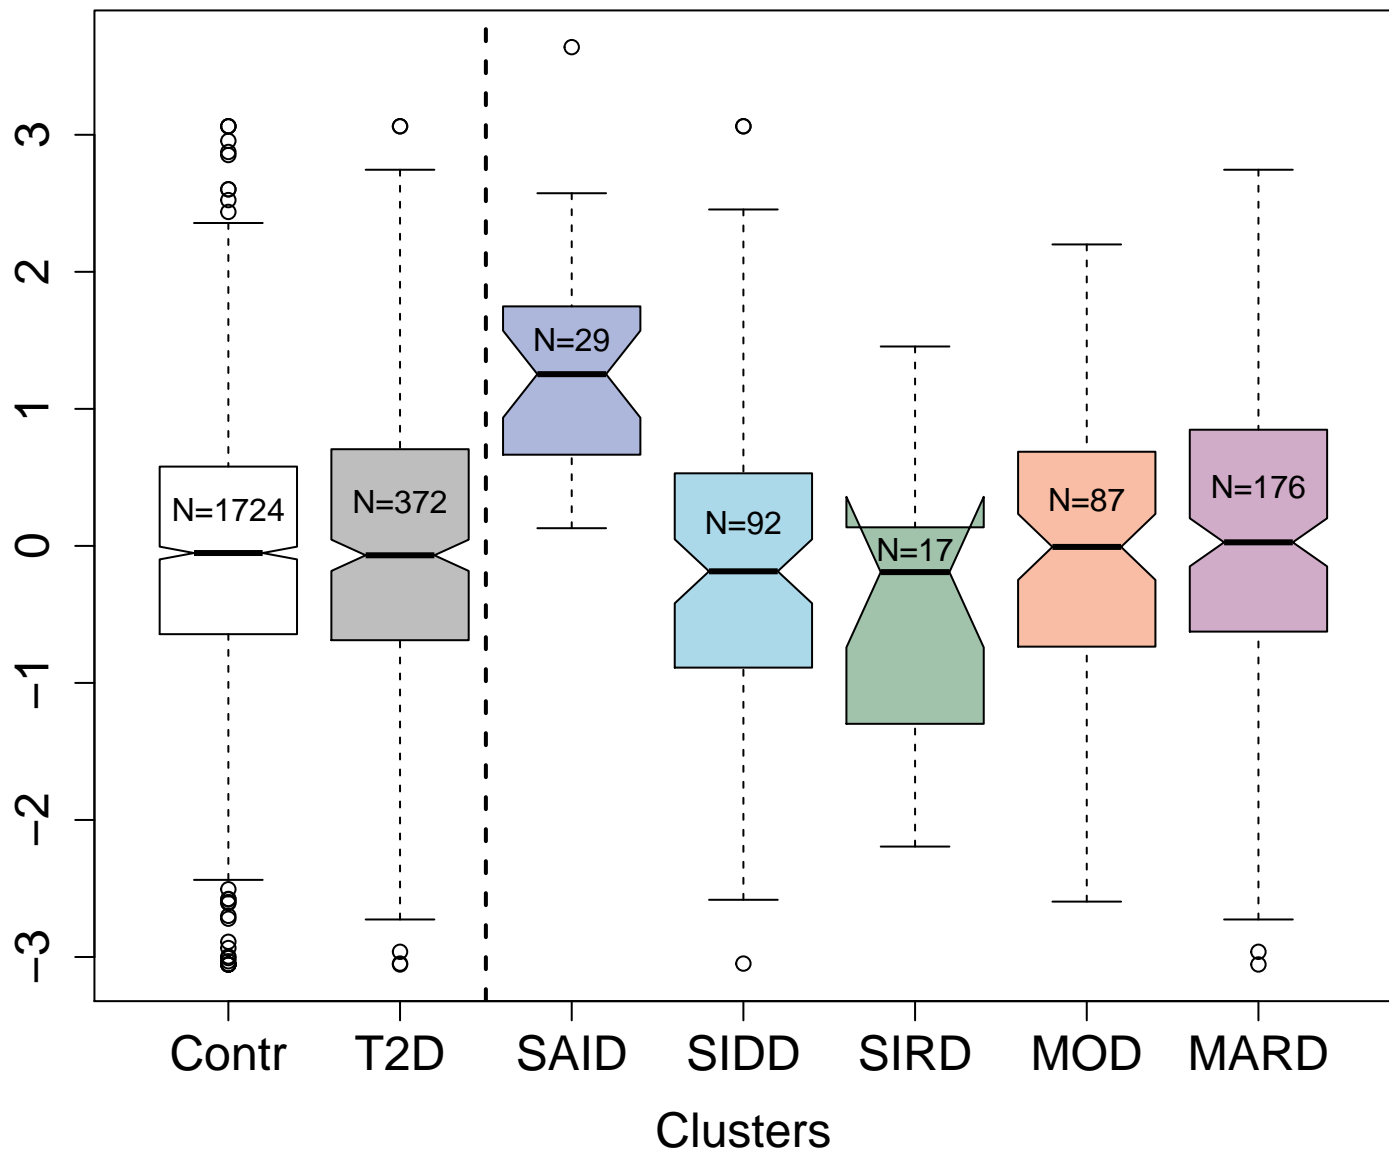



M63597 : 4-allylcatechol sulfate

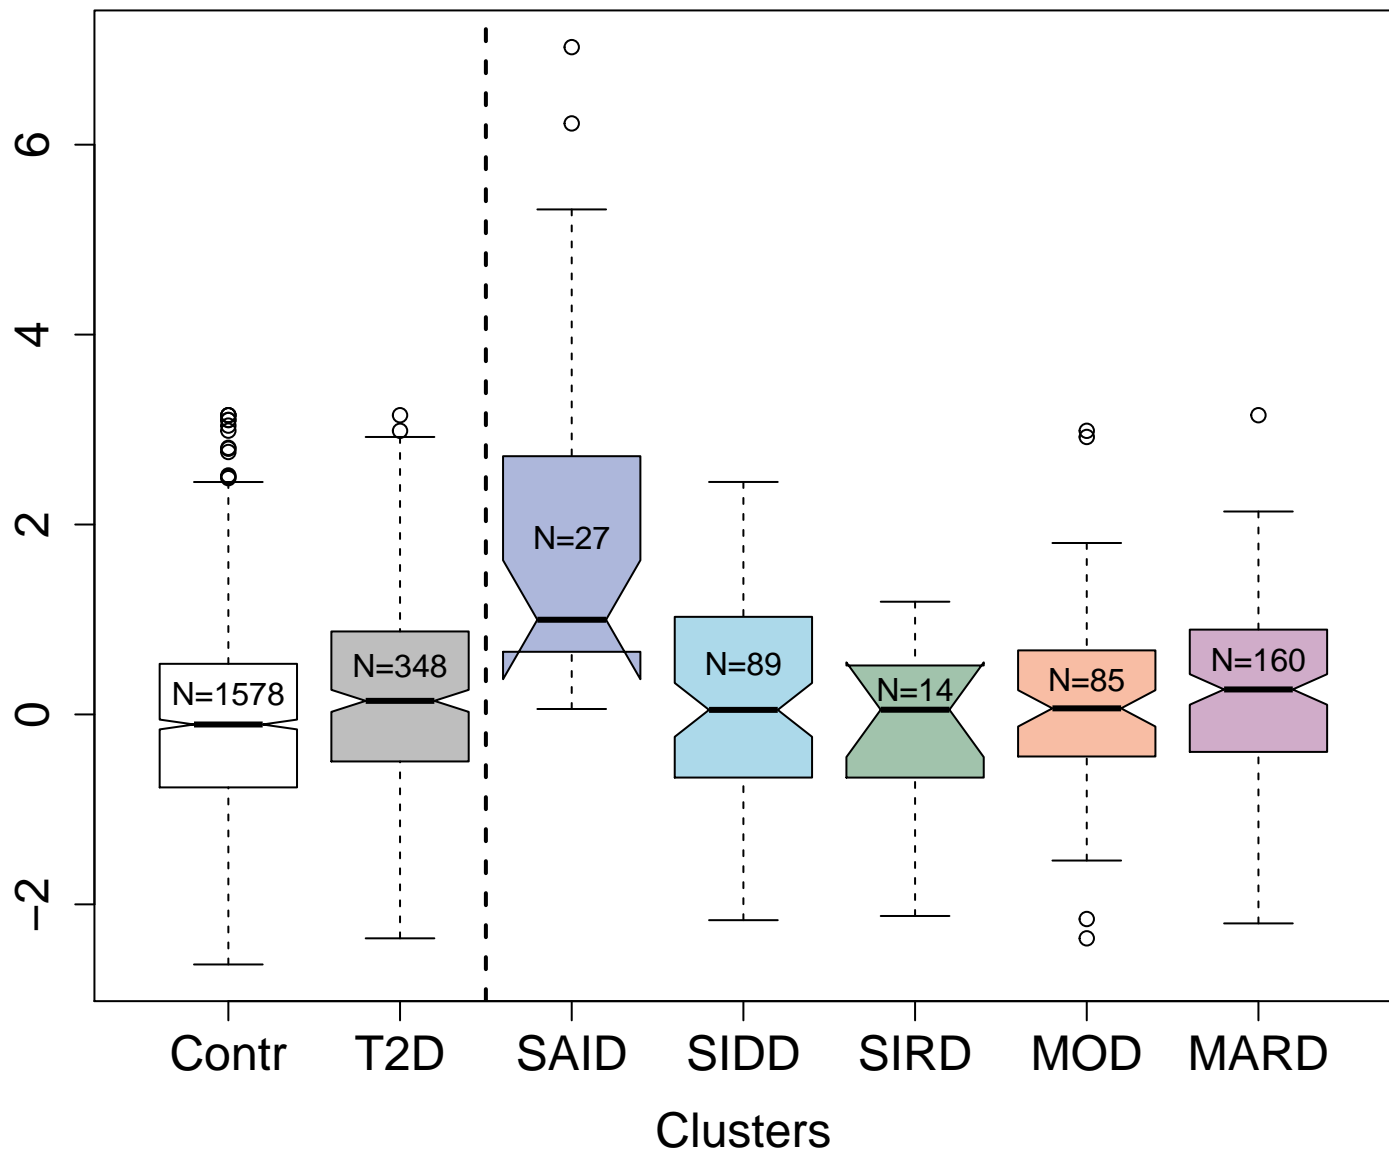

M47992 : X - 16649

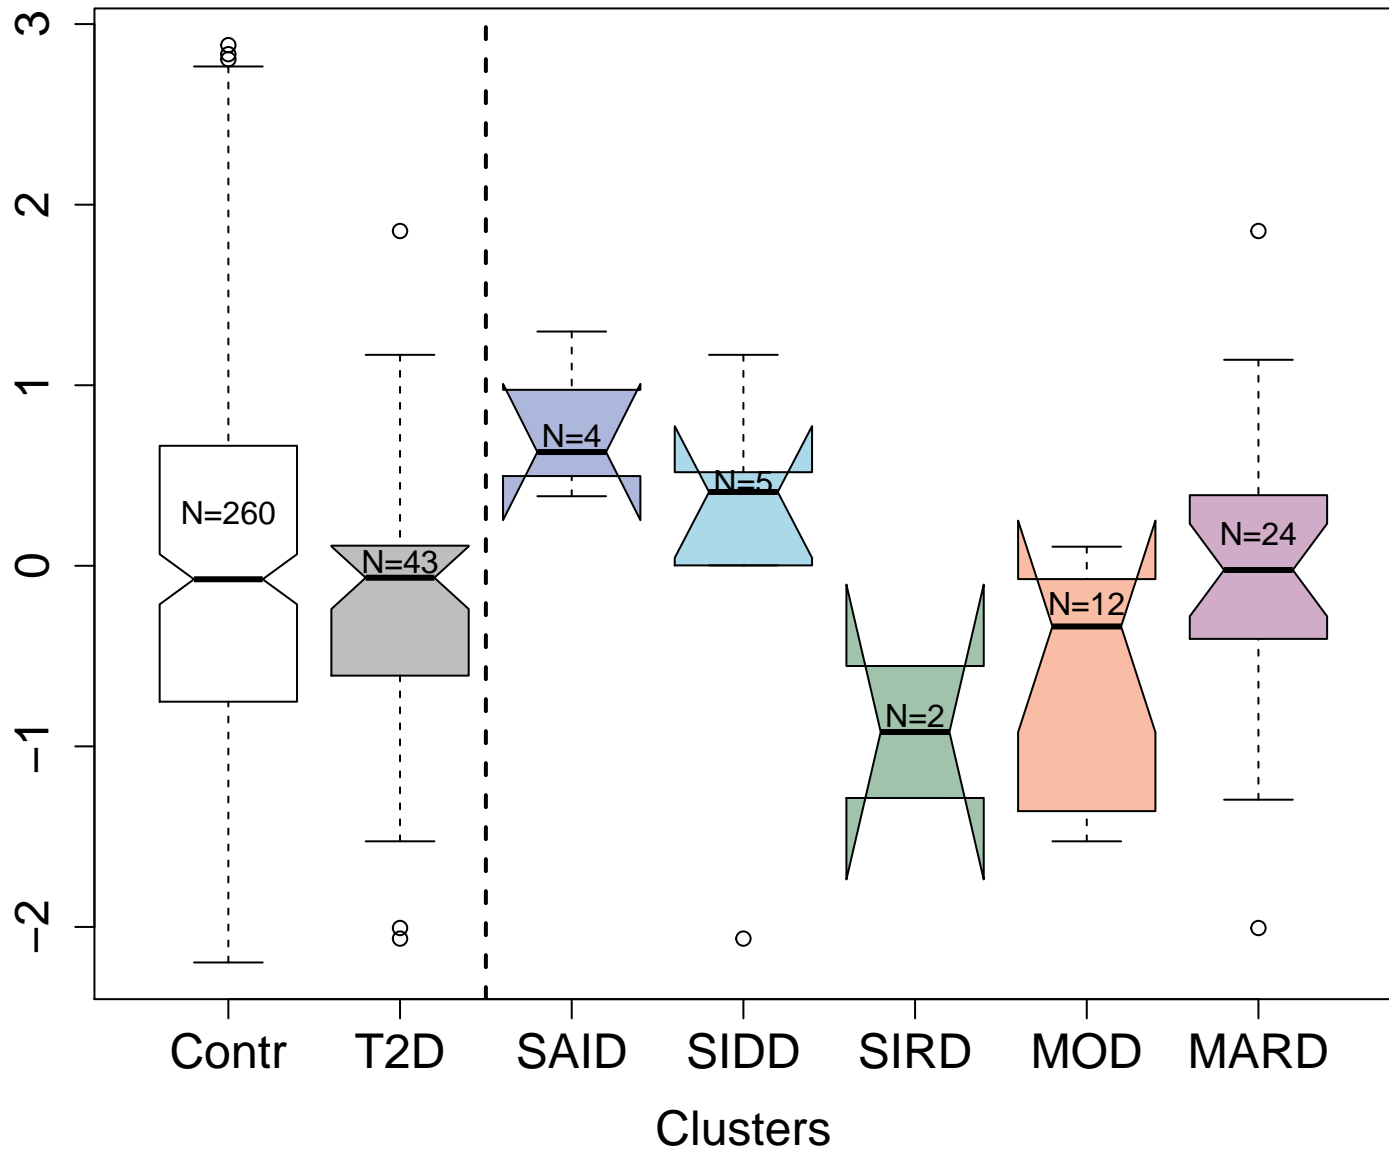

M52548 : X - 24352

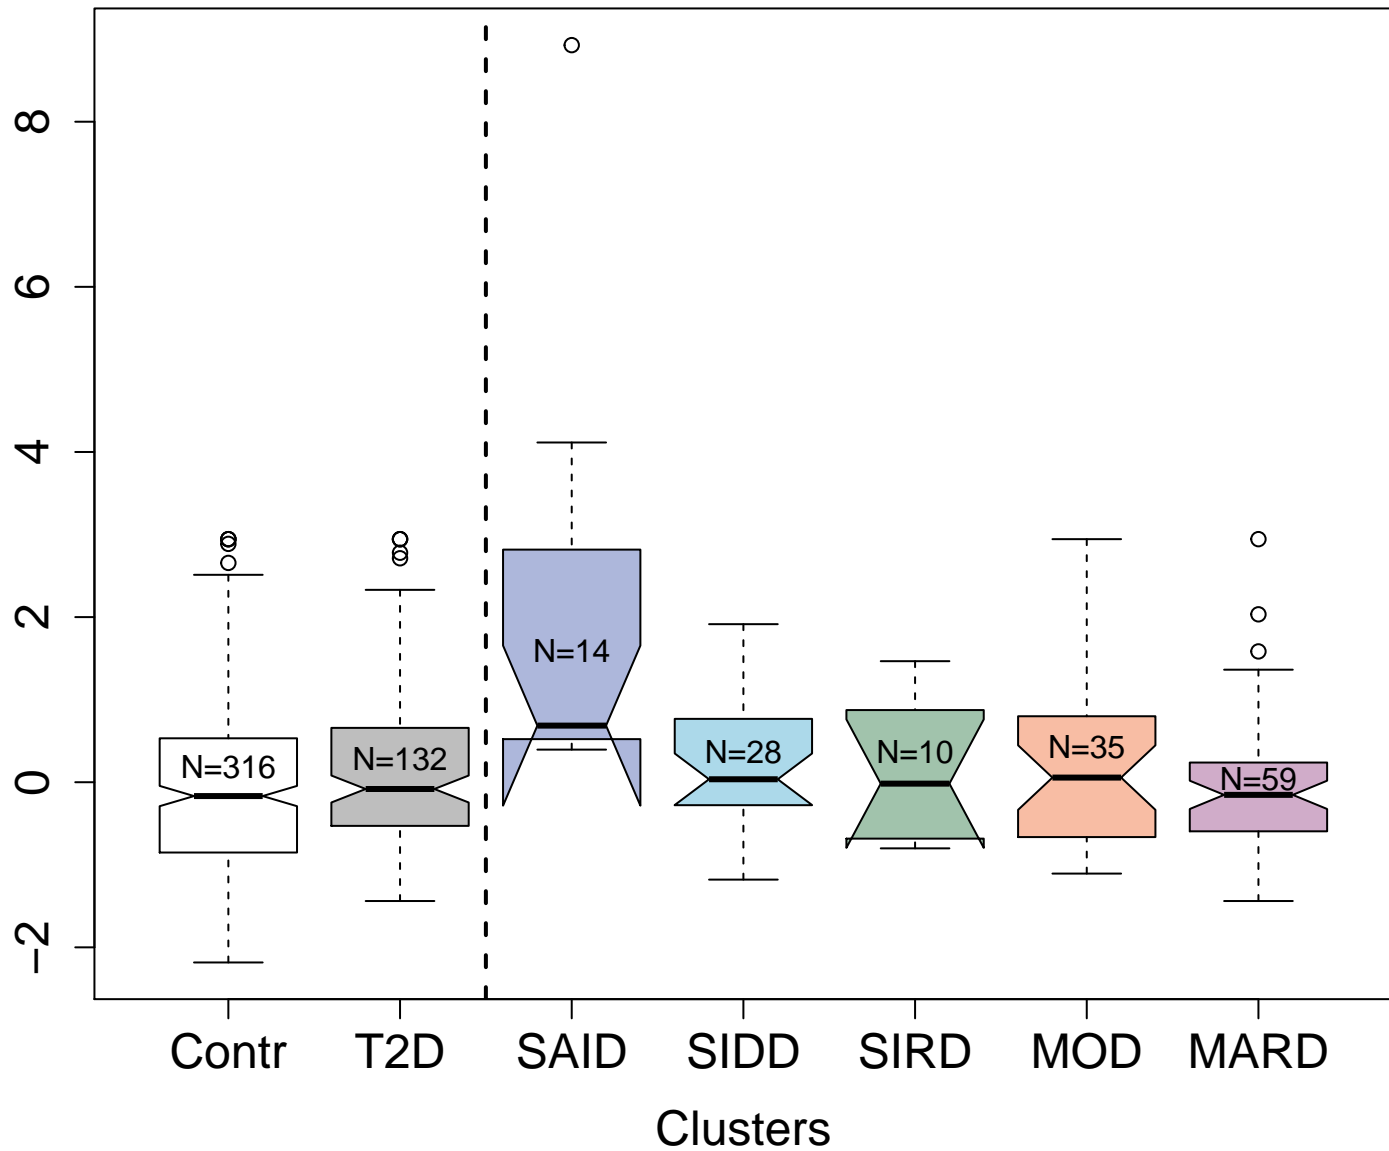

M38276 : 2,3-dihydroxyisovalerate

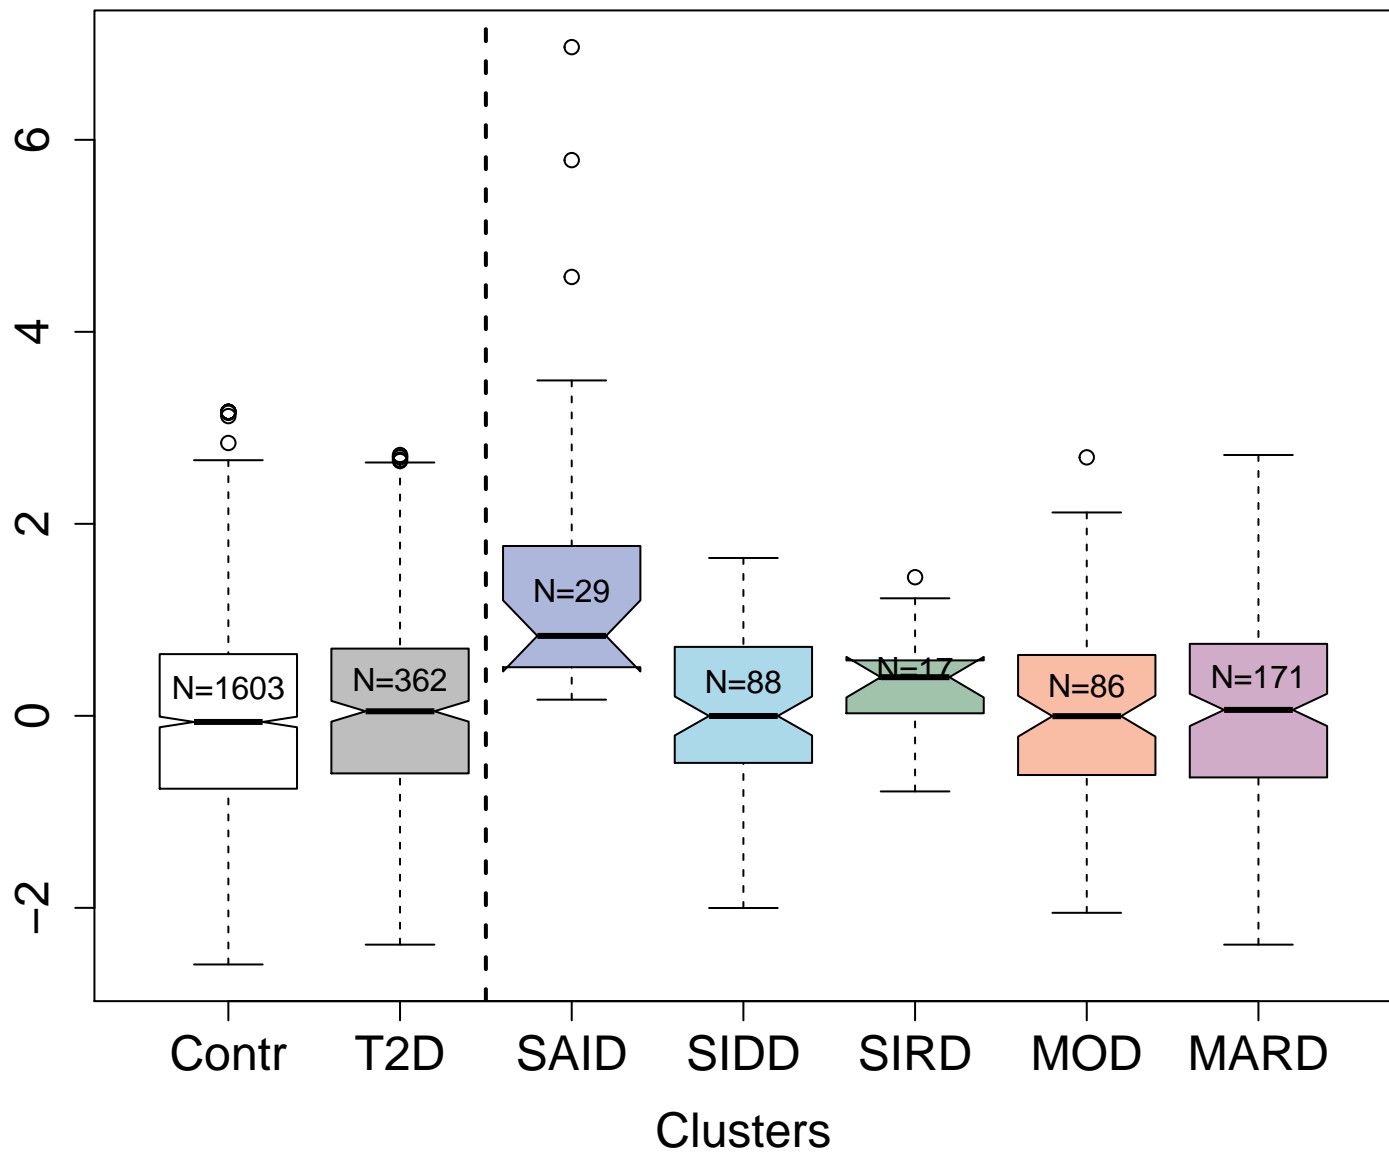

M34424 : 5-acetylamino-6-amino-3-methyluracil

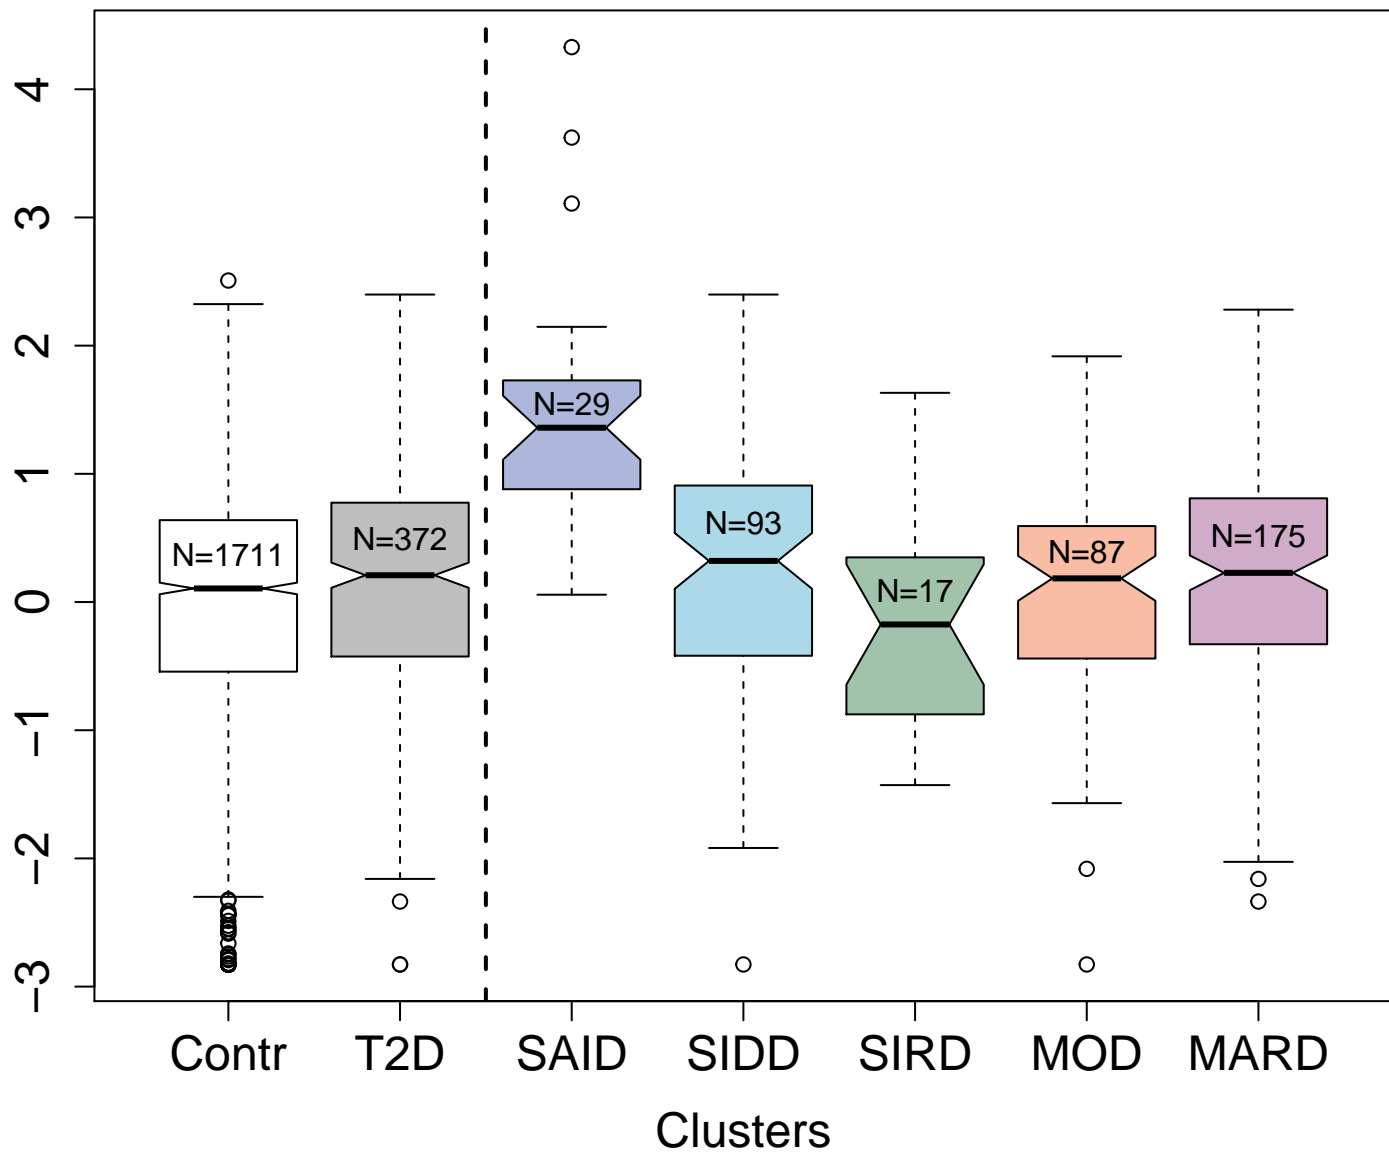

M46730 : X - 21661

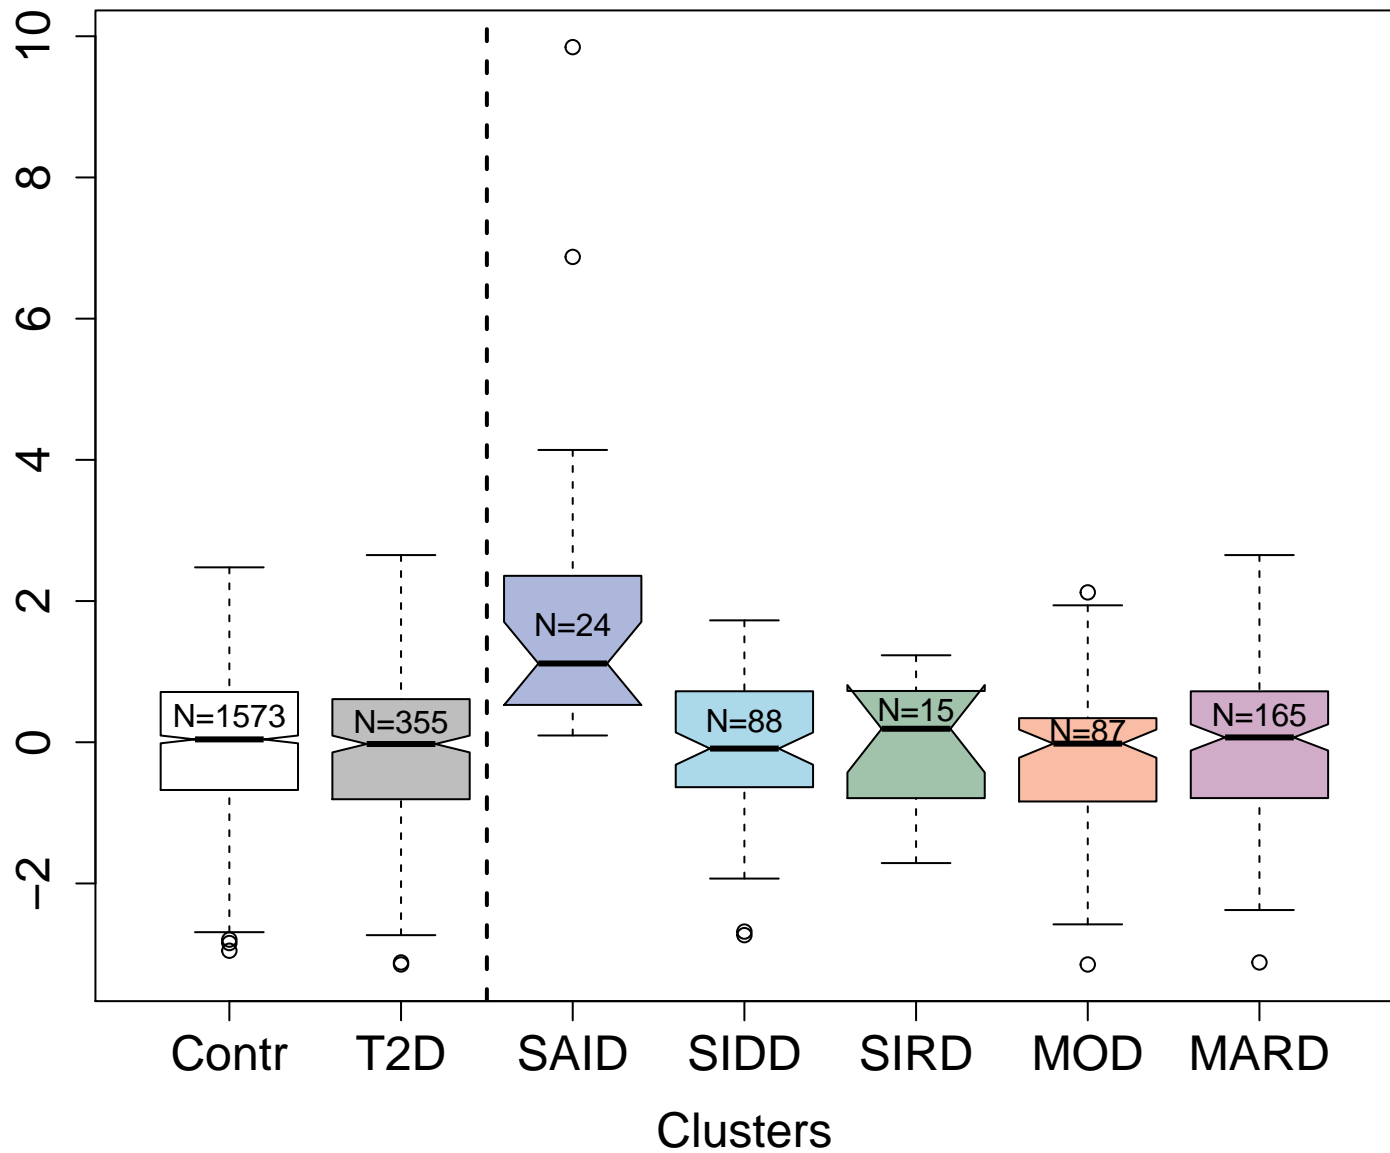

M48885 : arabinol/xyliol

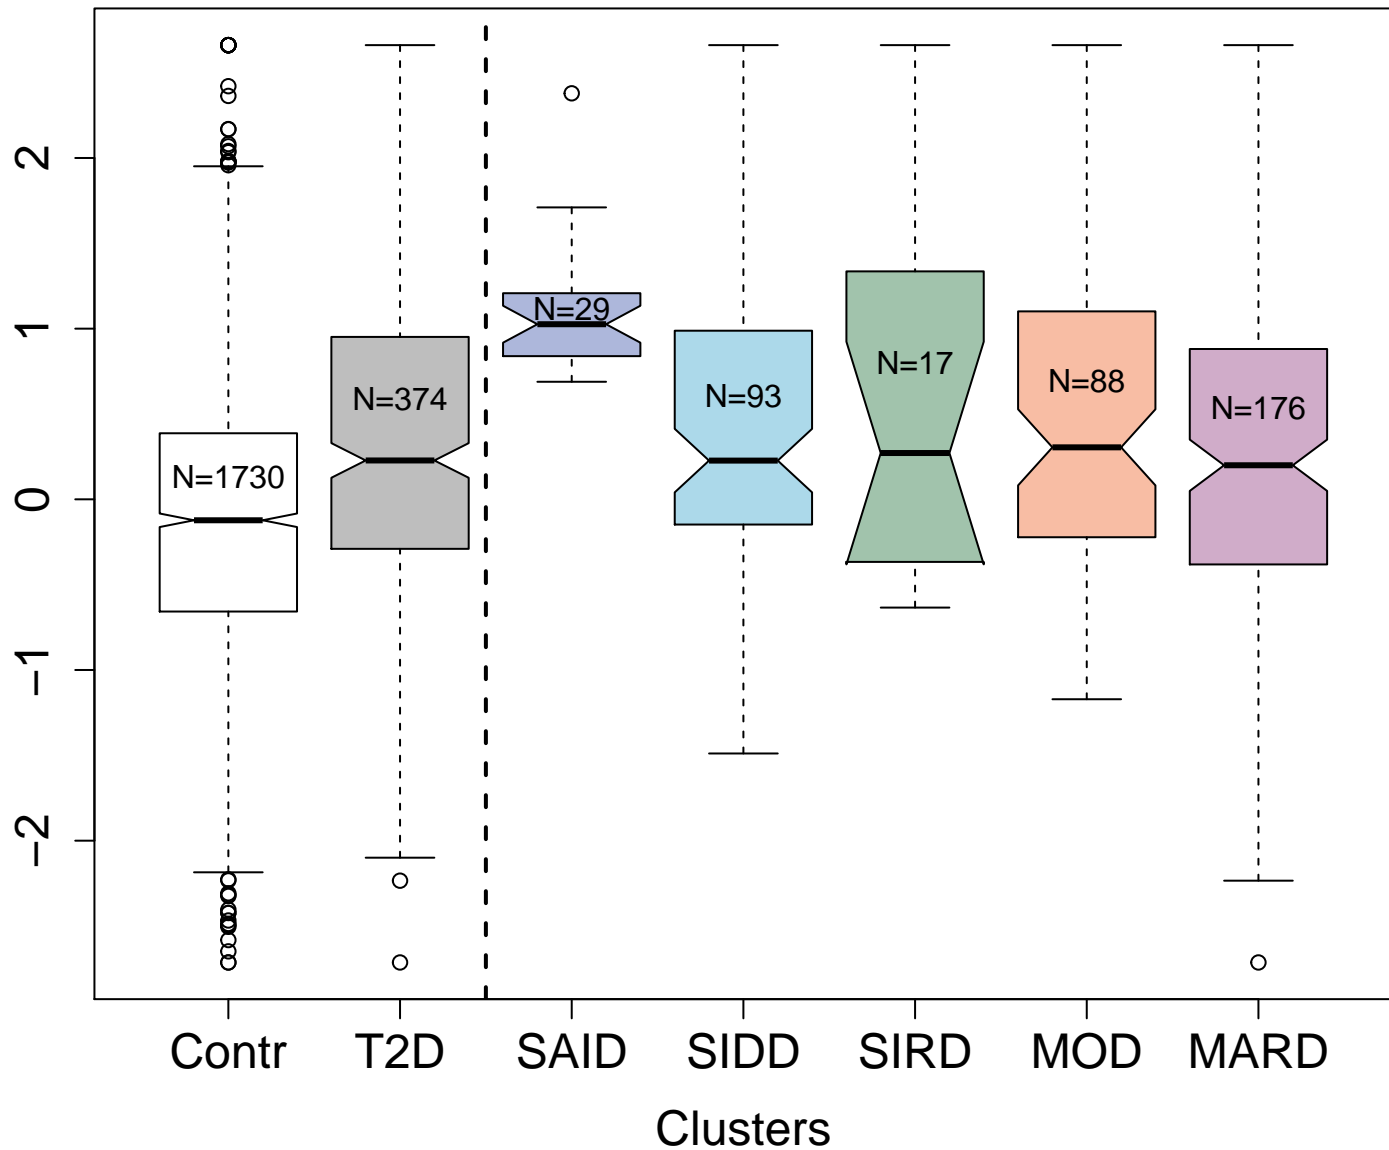

M33132 : X - 11787

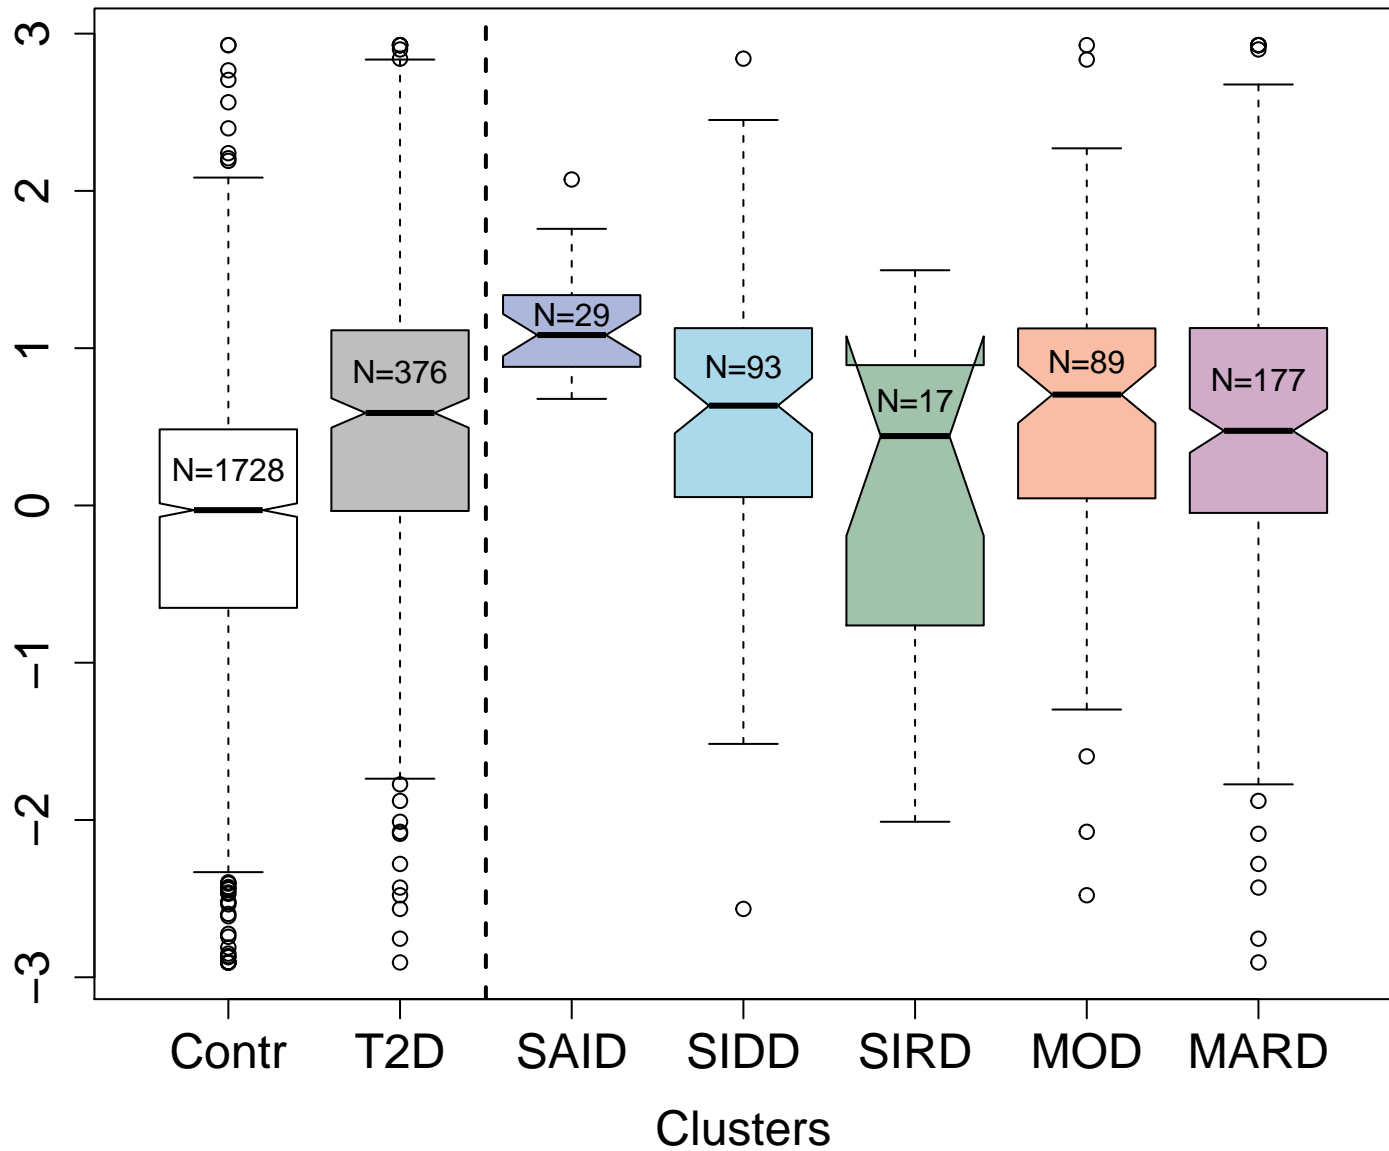



M40481 : dihydroferulate

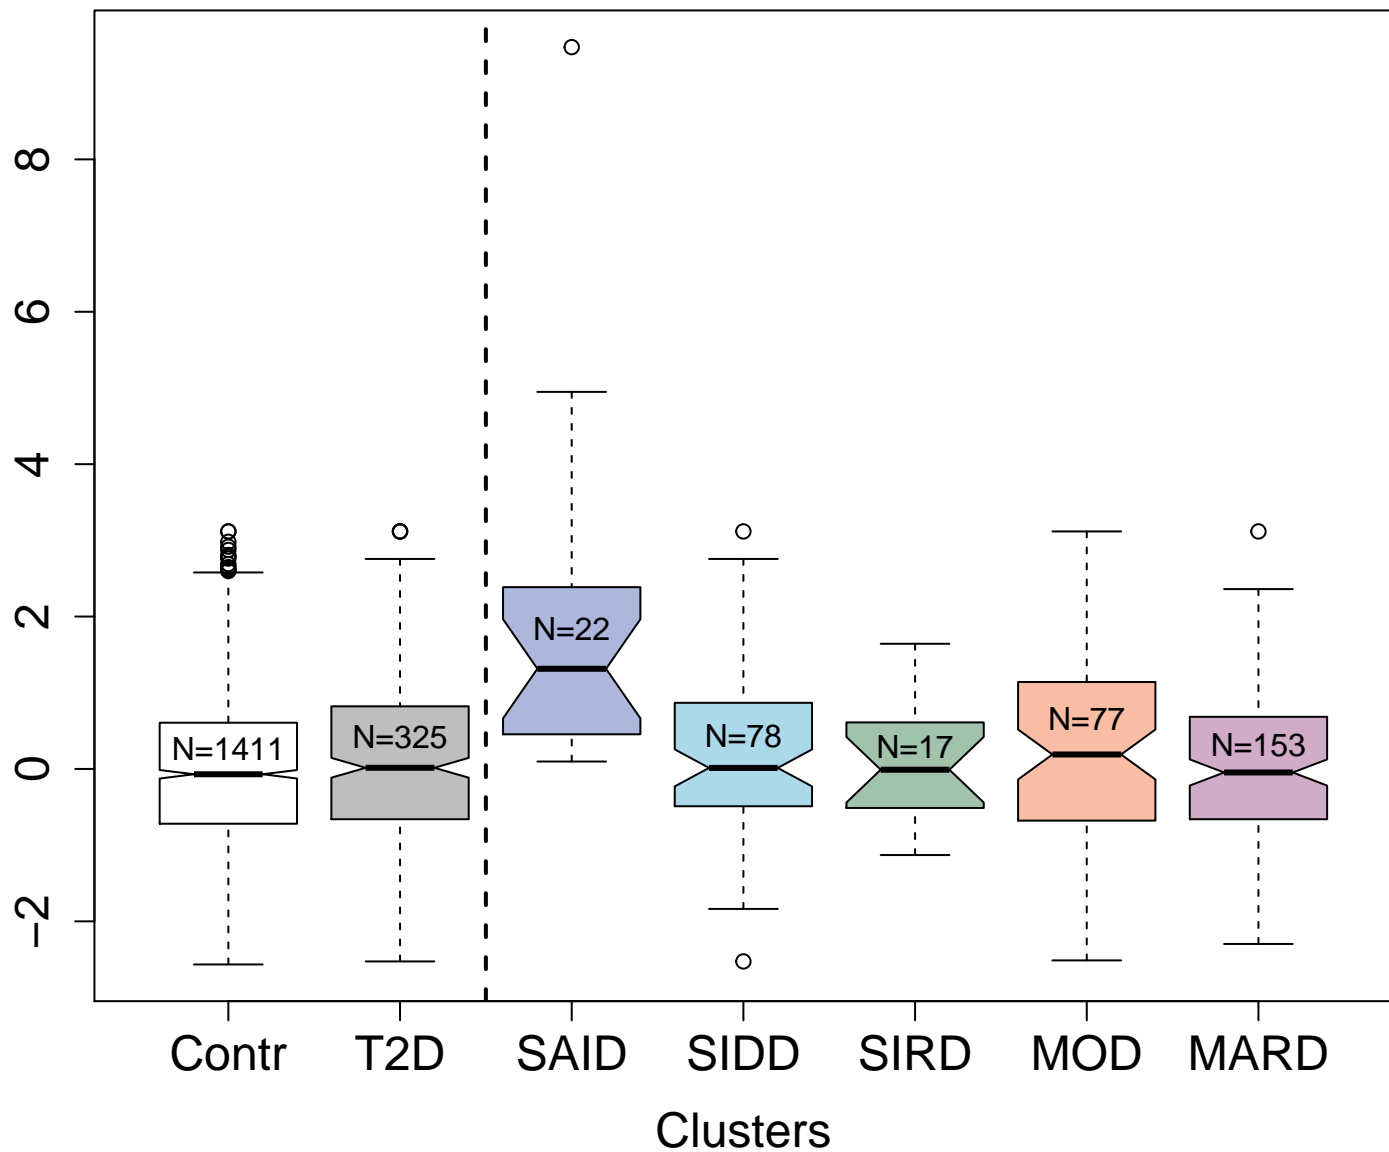

M35107 : isovalerylglycine

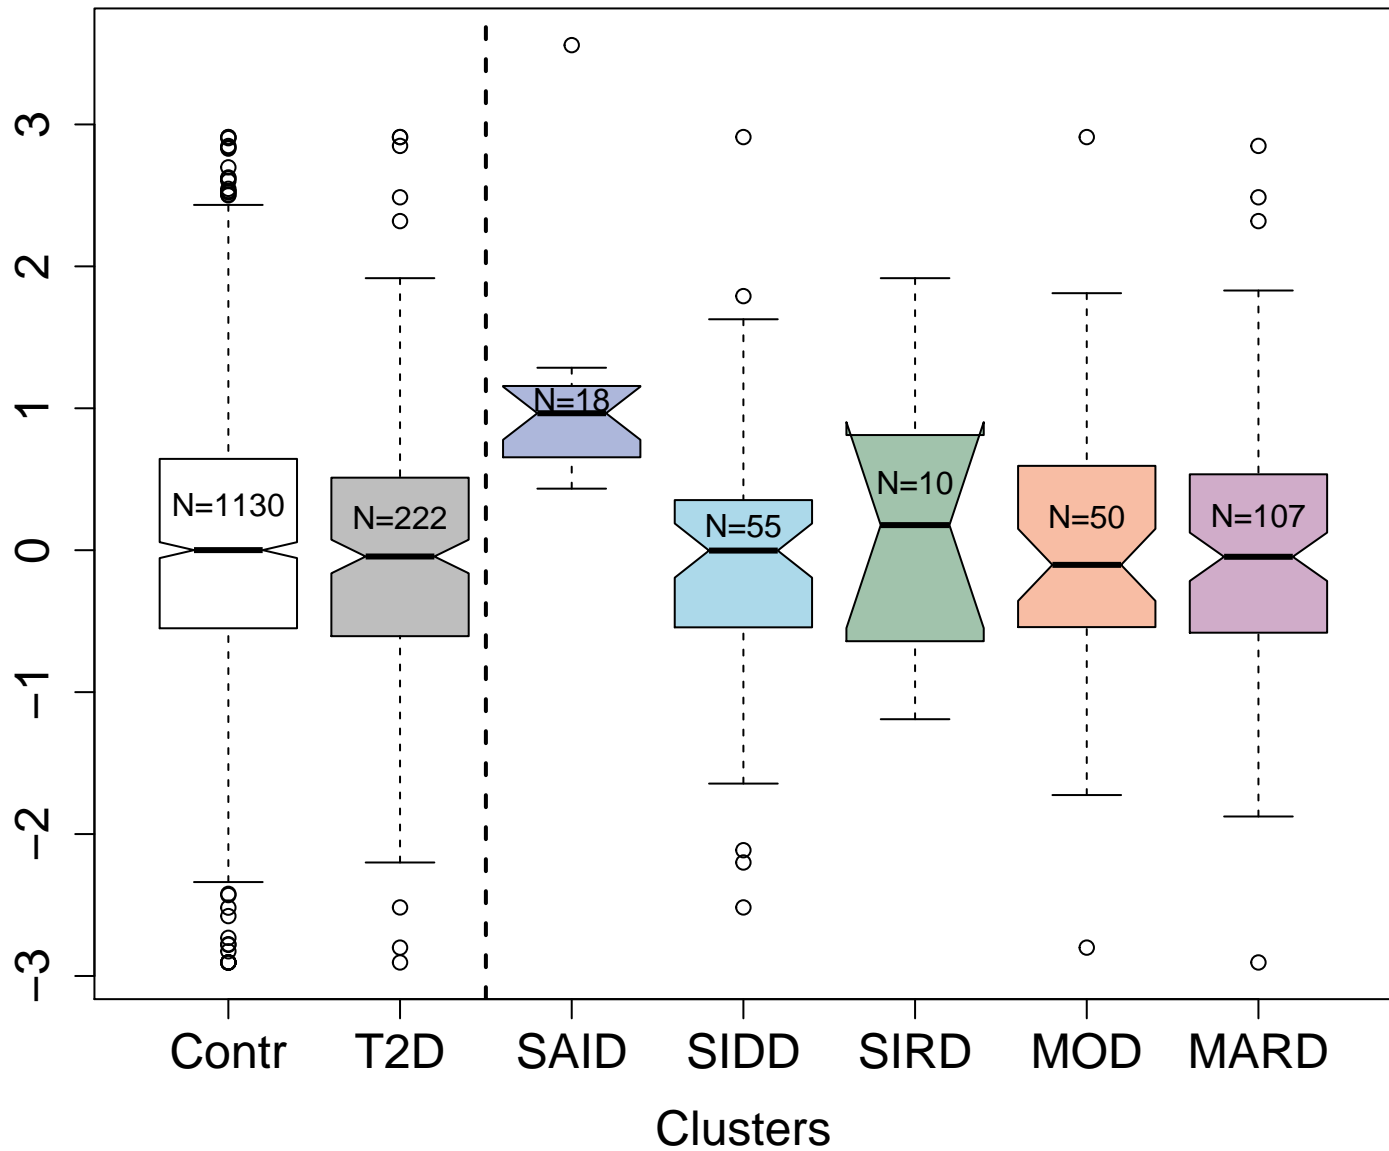

M32349 : 4-imidazoleacetate

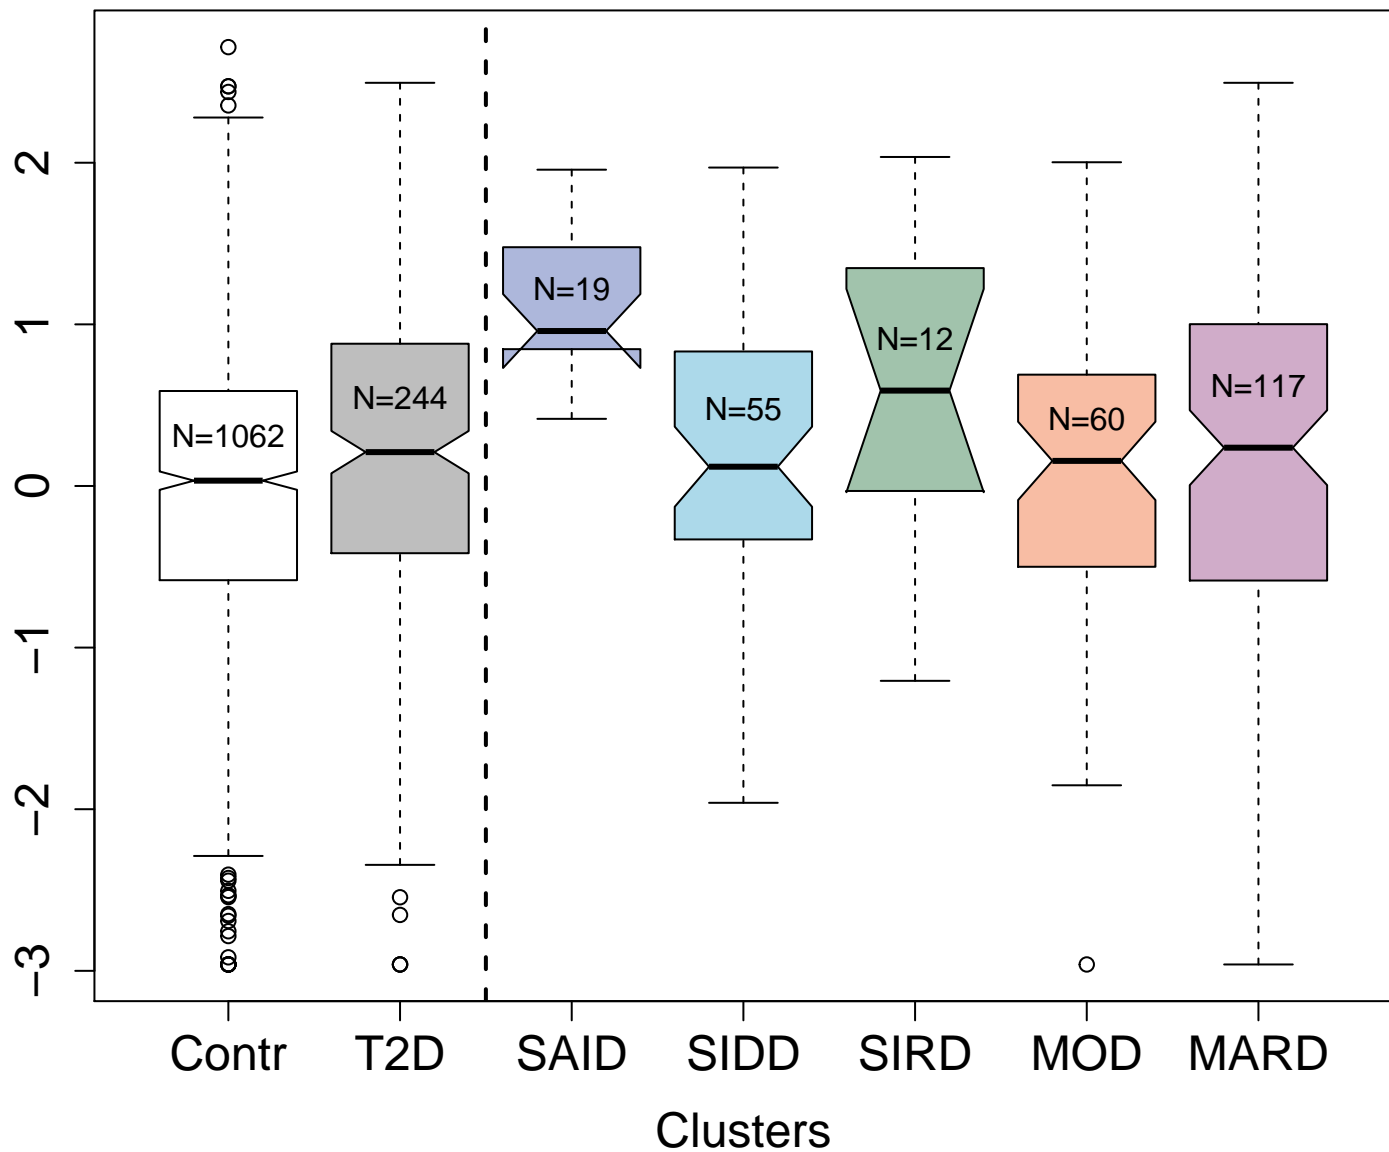

M1418 : 5,6-dihydrothymine

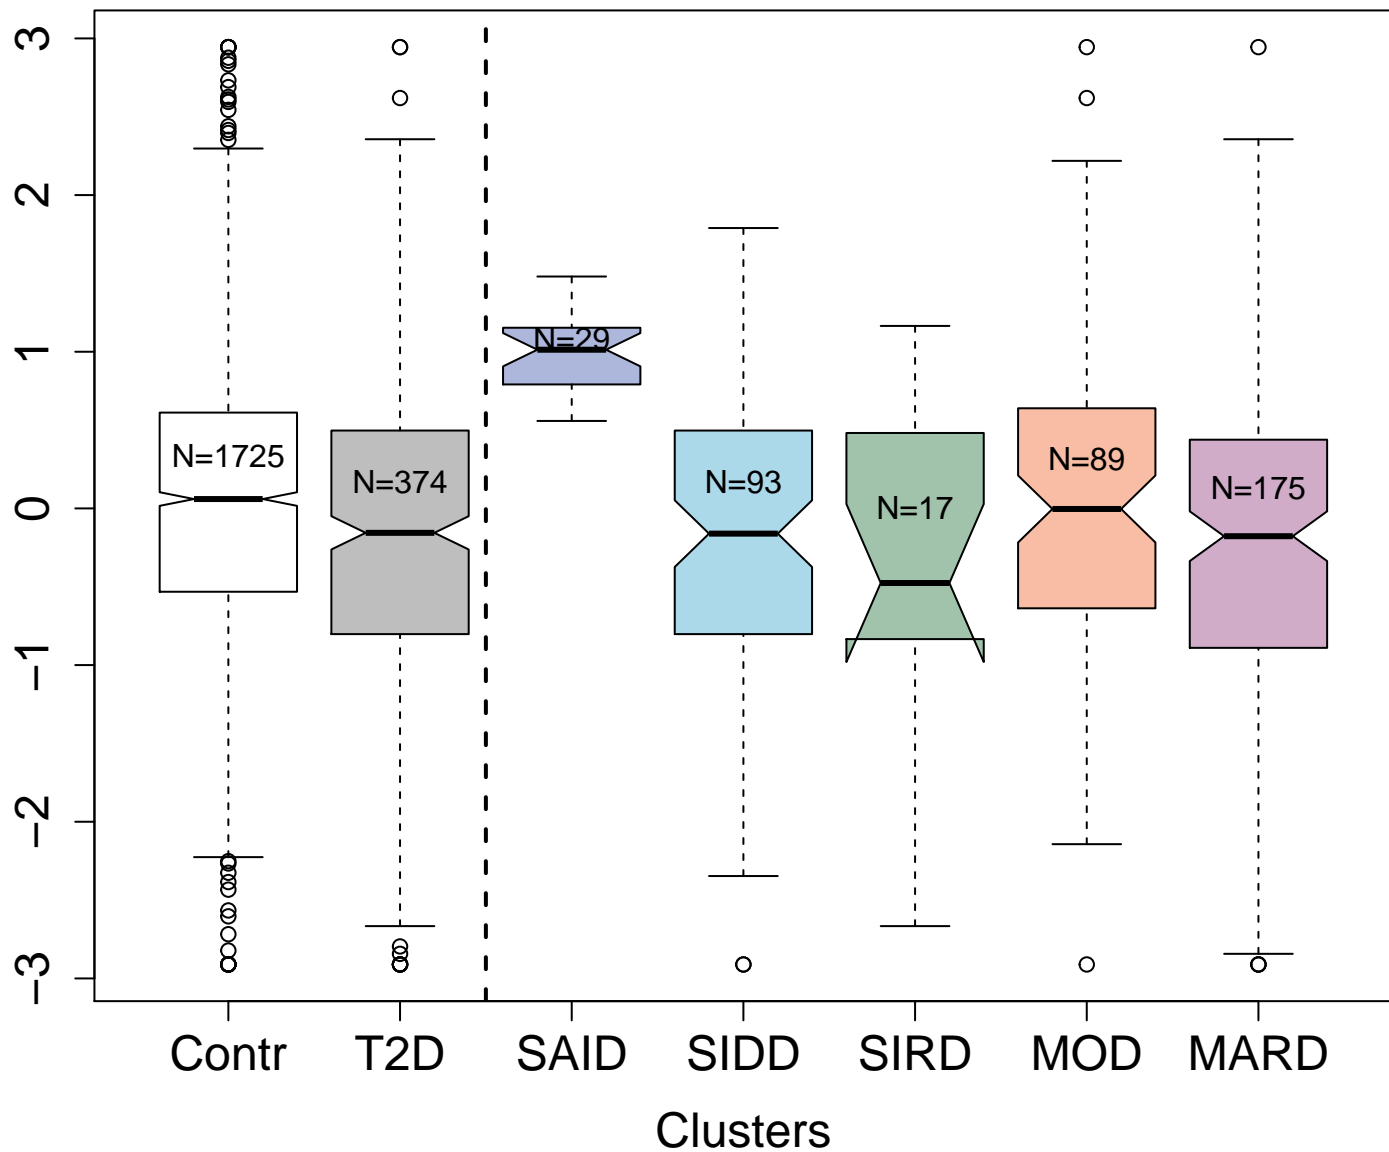

M57810 : nisinatc (24:6n3)

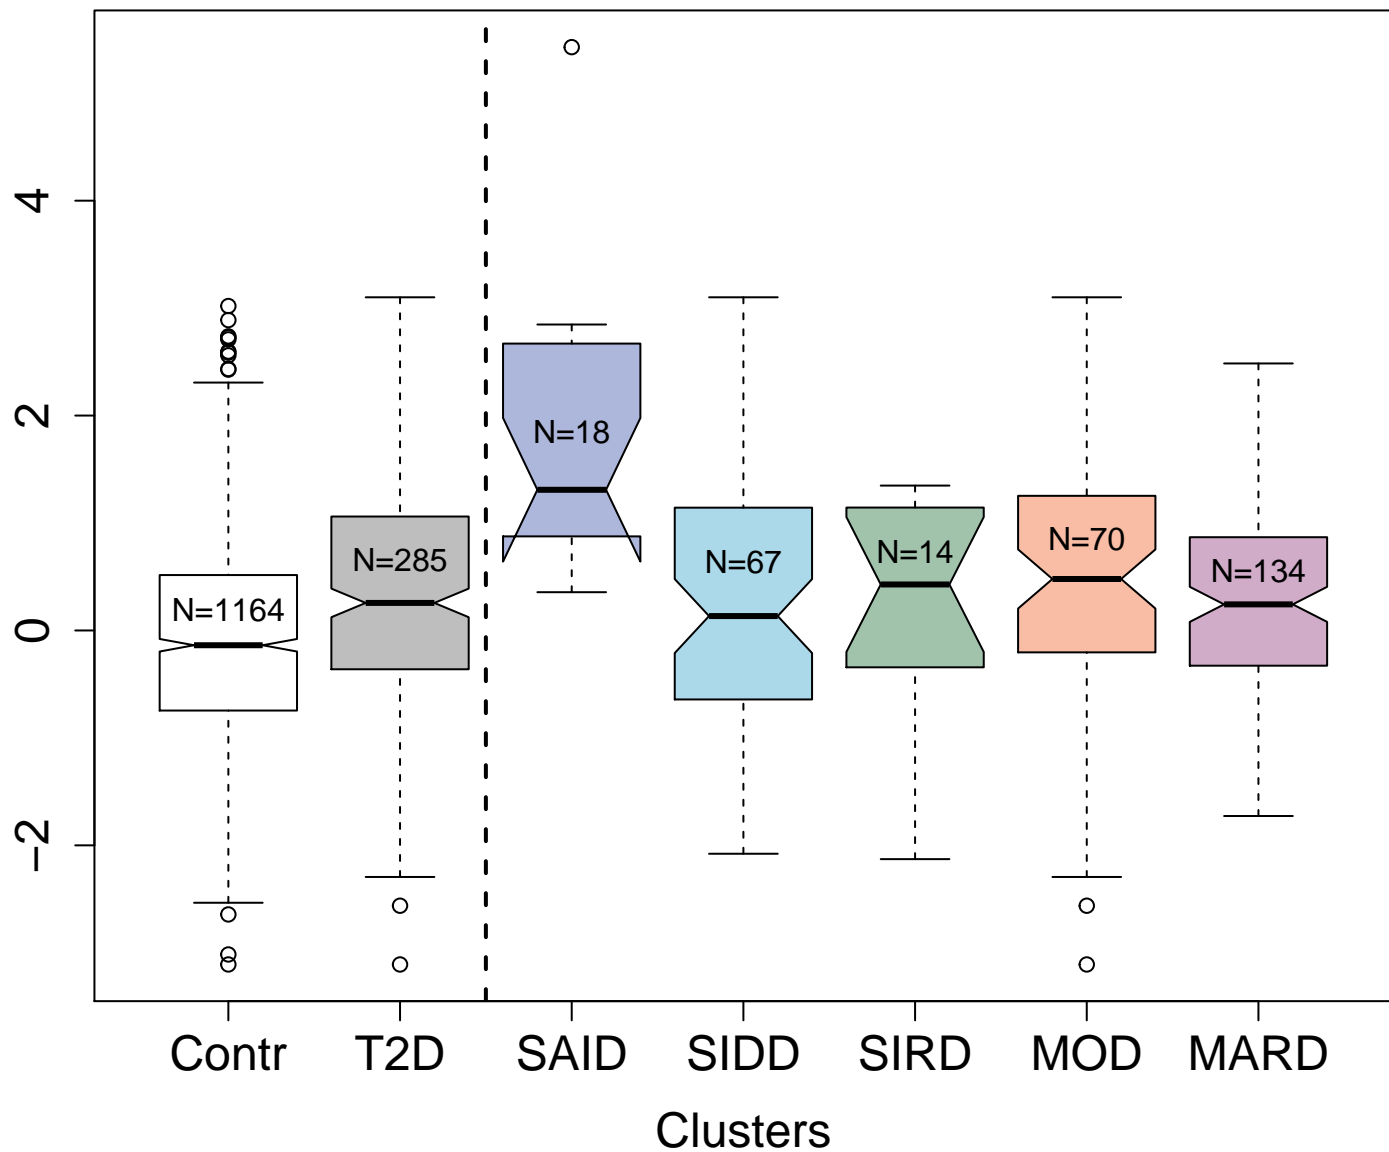

M53097 : X - 24669

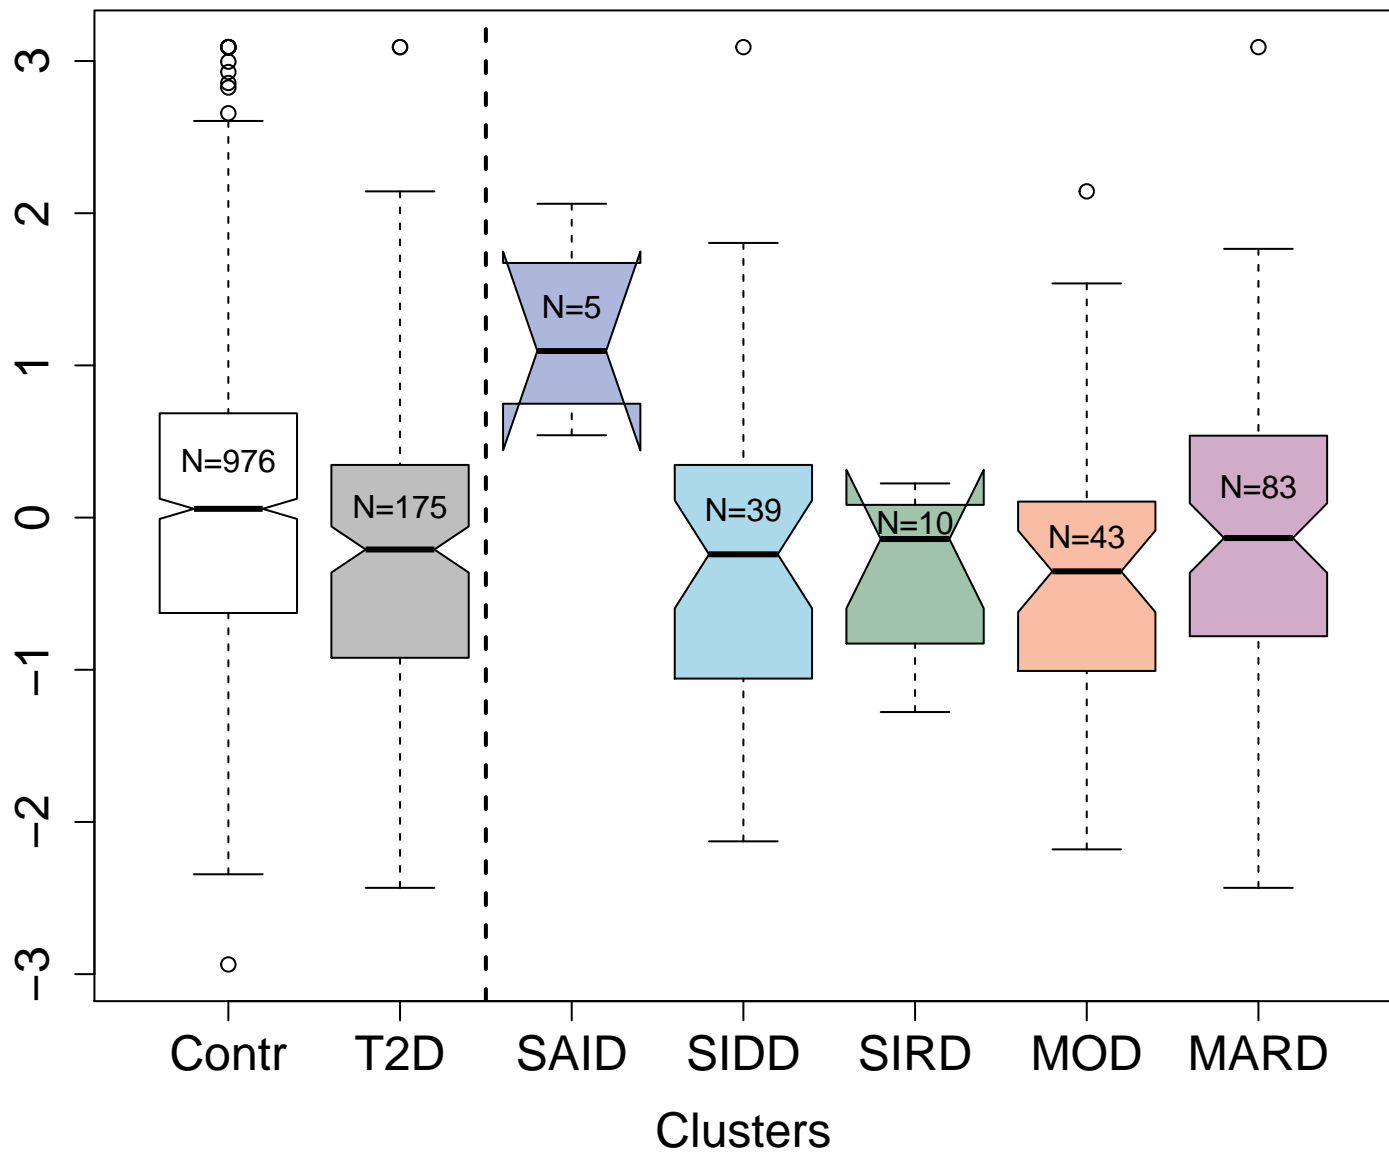

M12261 : taurodeoxycholate

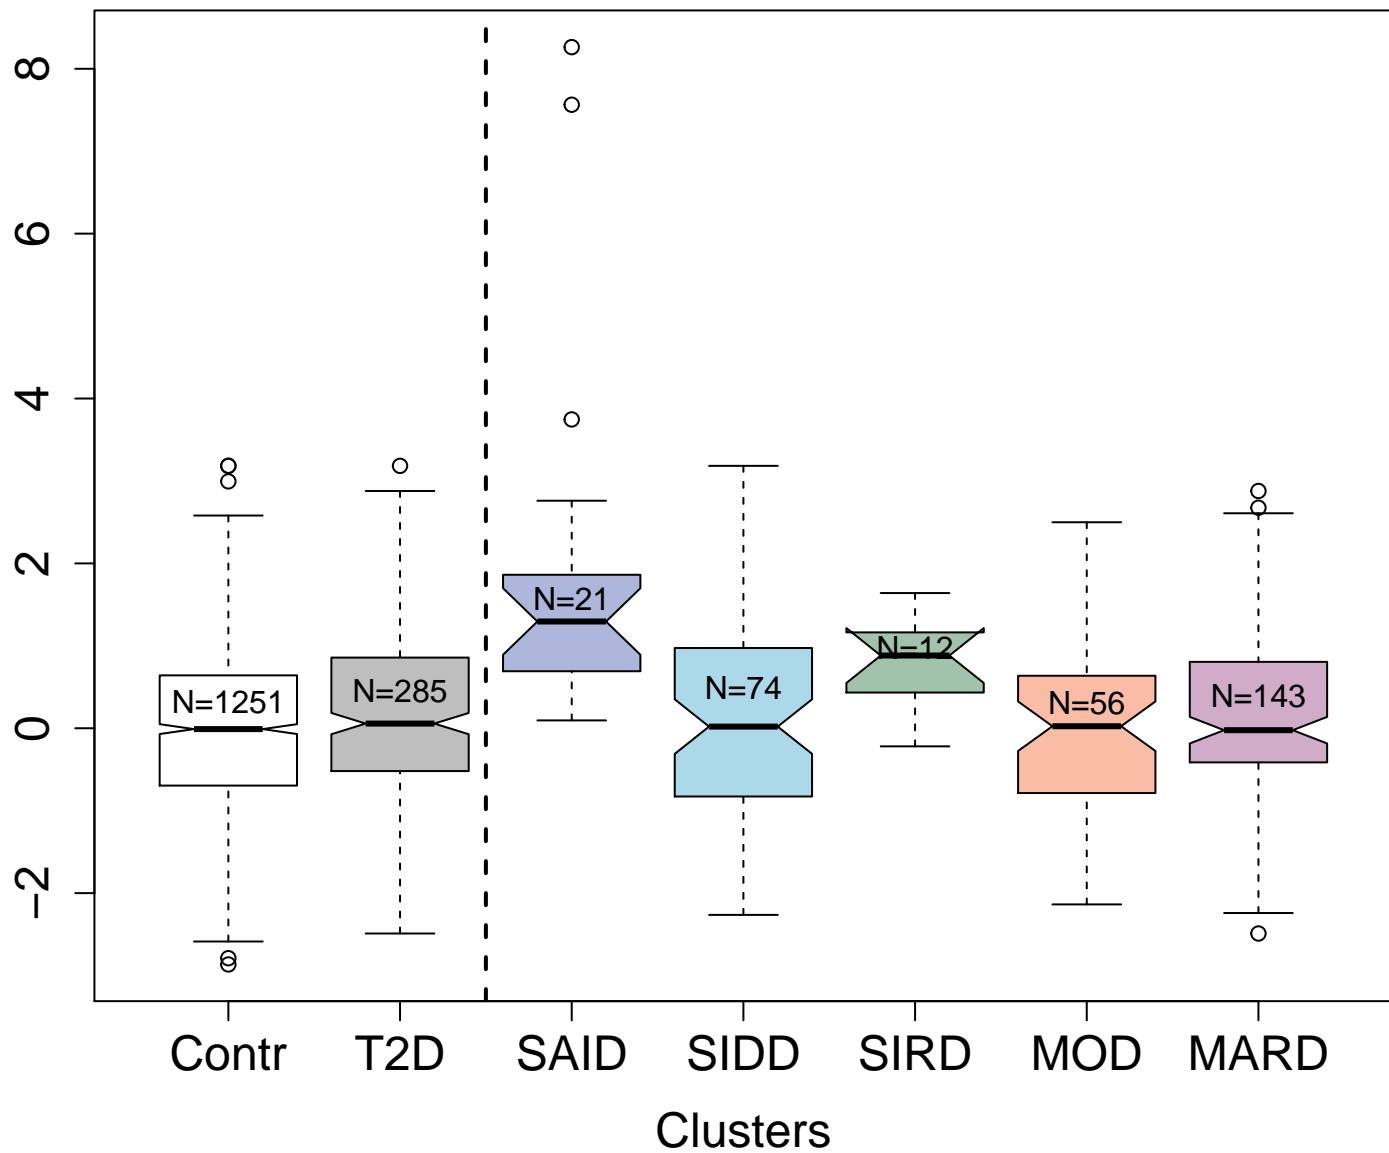

M35126 : phenylacetylglutamine

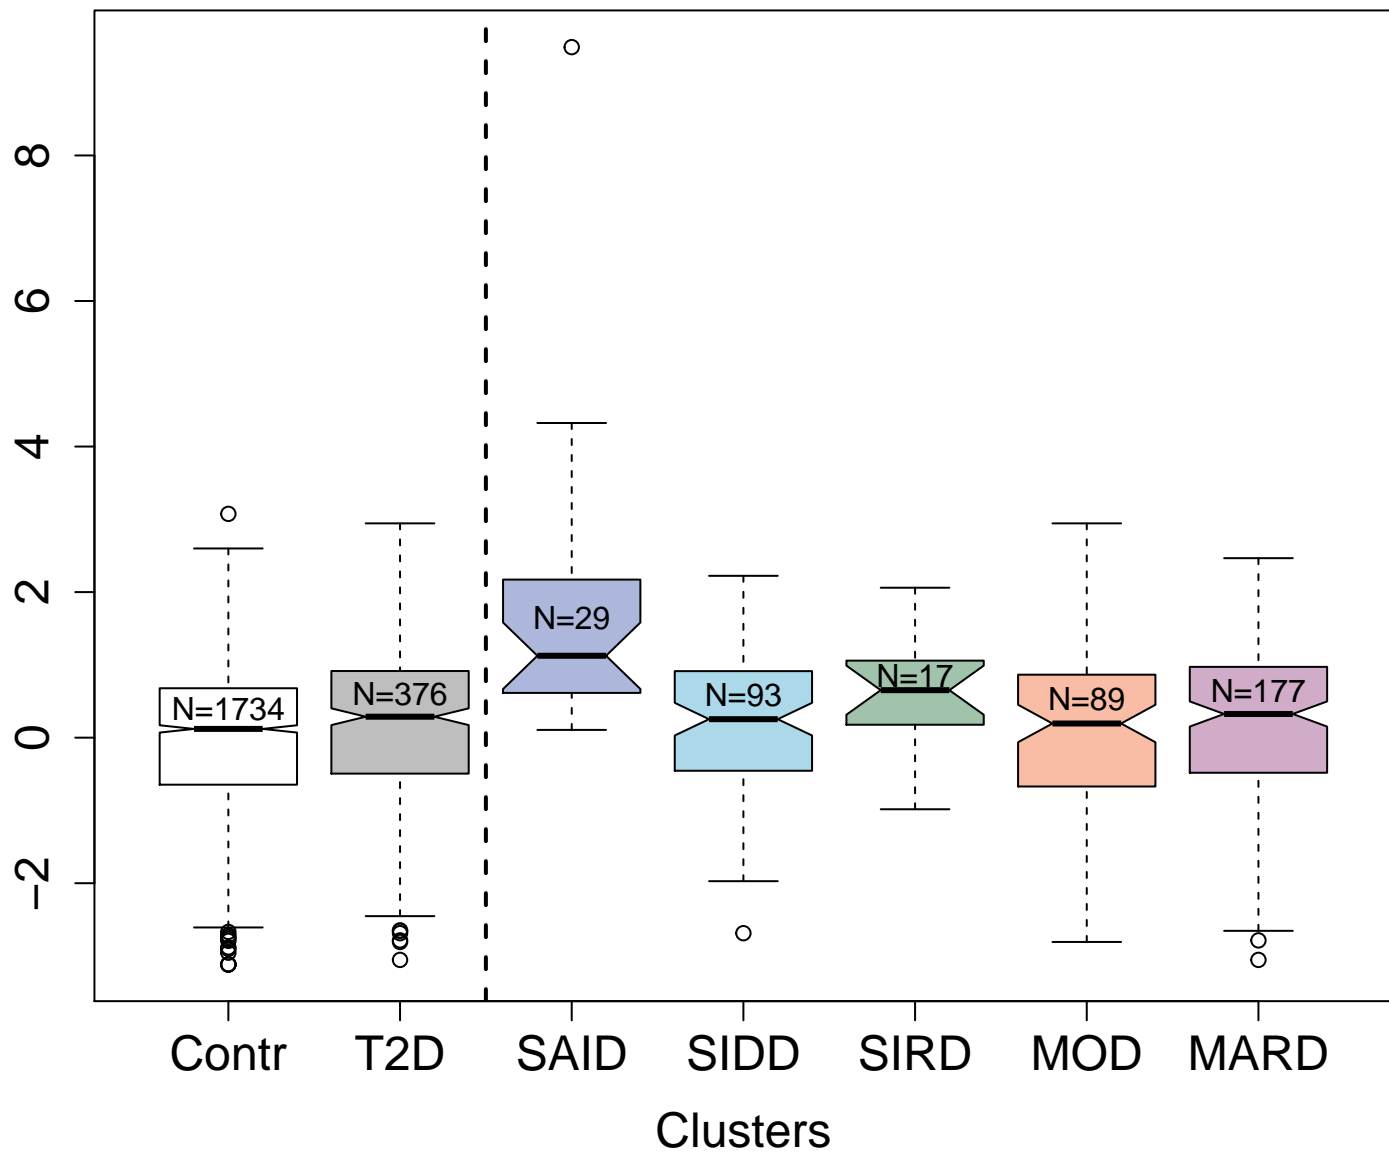



M52697 : 1-oleoyl-2-docosahexaenoyl-GPC (18:1/22:6)\*

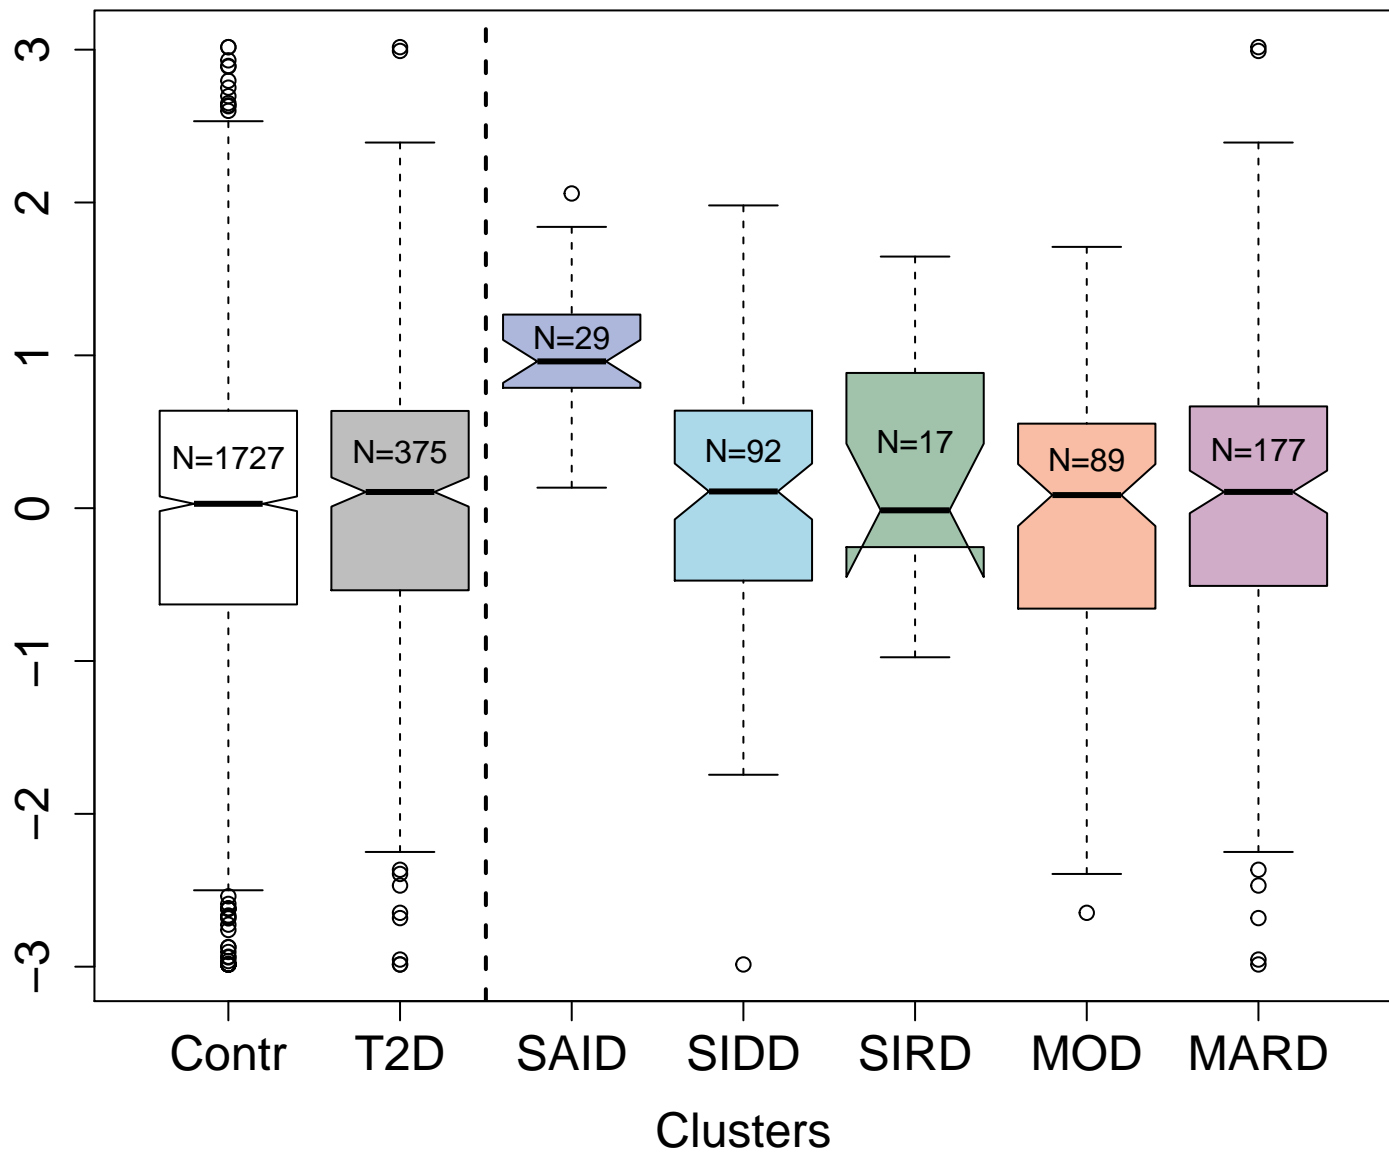

M37496 : N-acetylputrescine

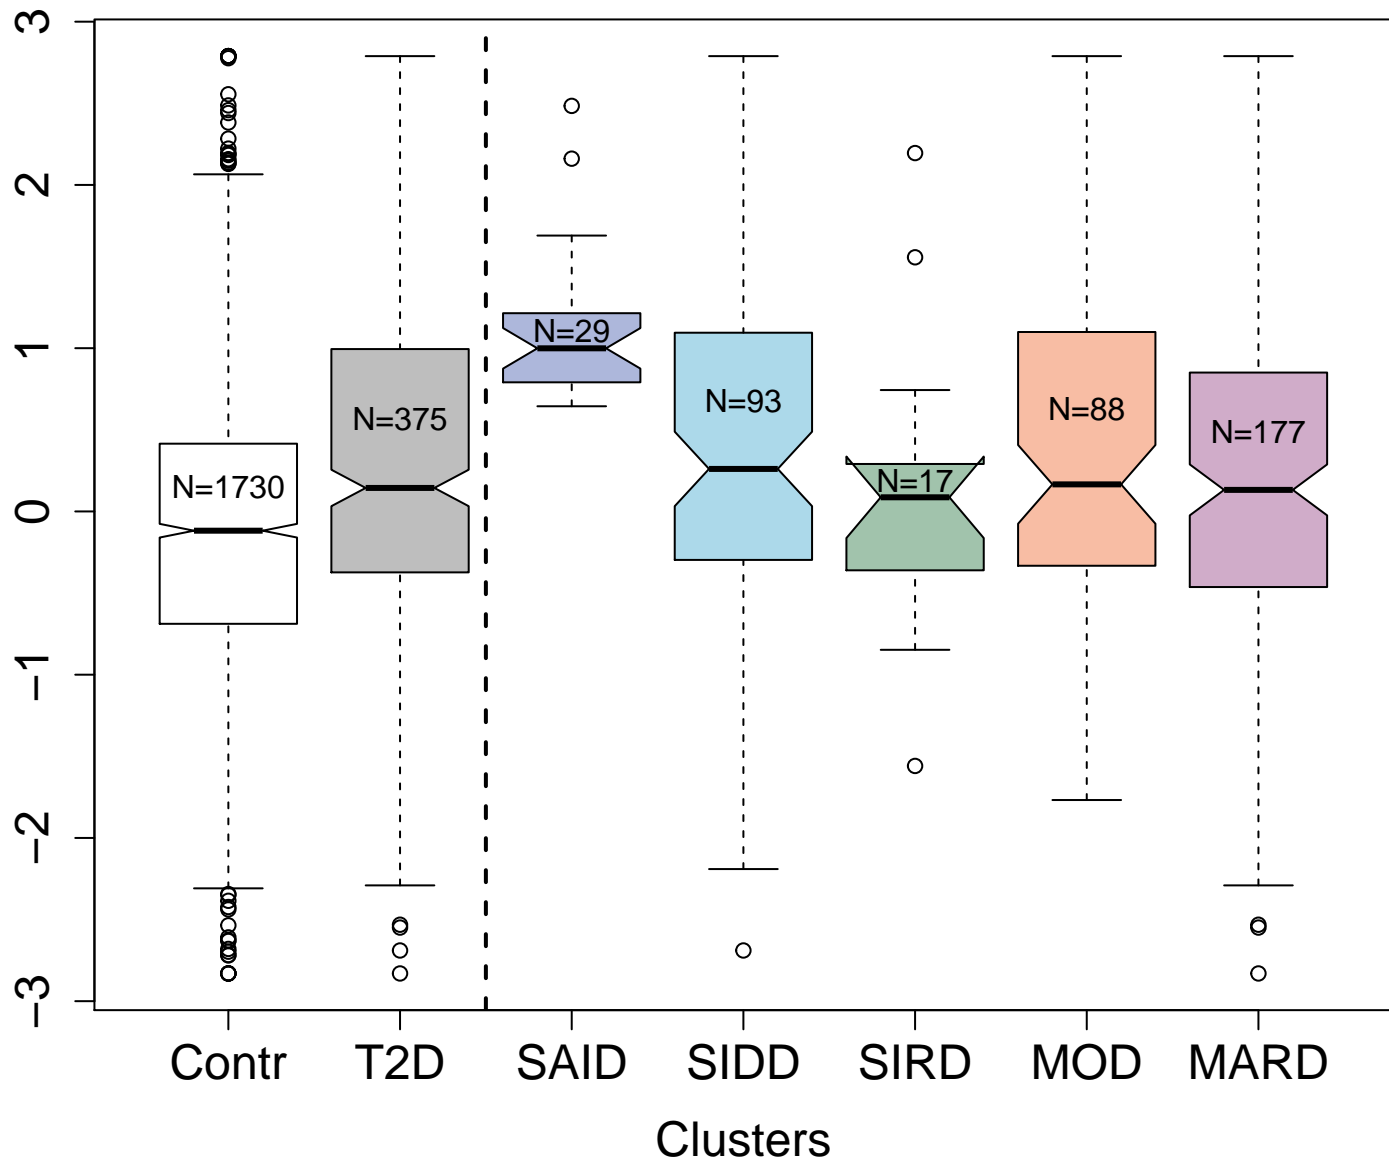

M37478 : docosapentaenoate (n6 DPA; 22:5n6)

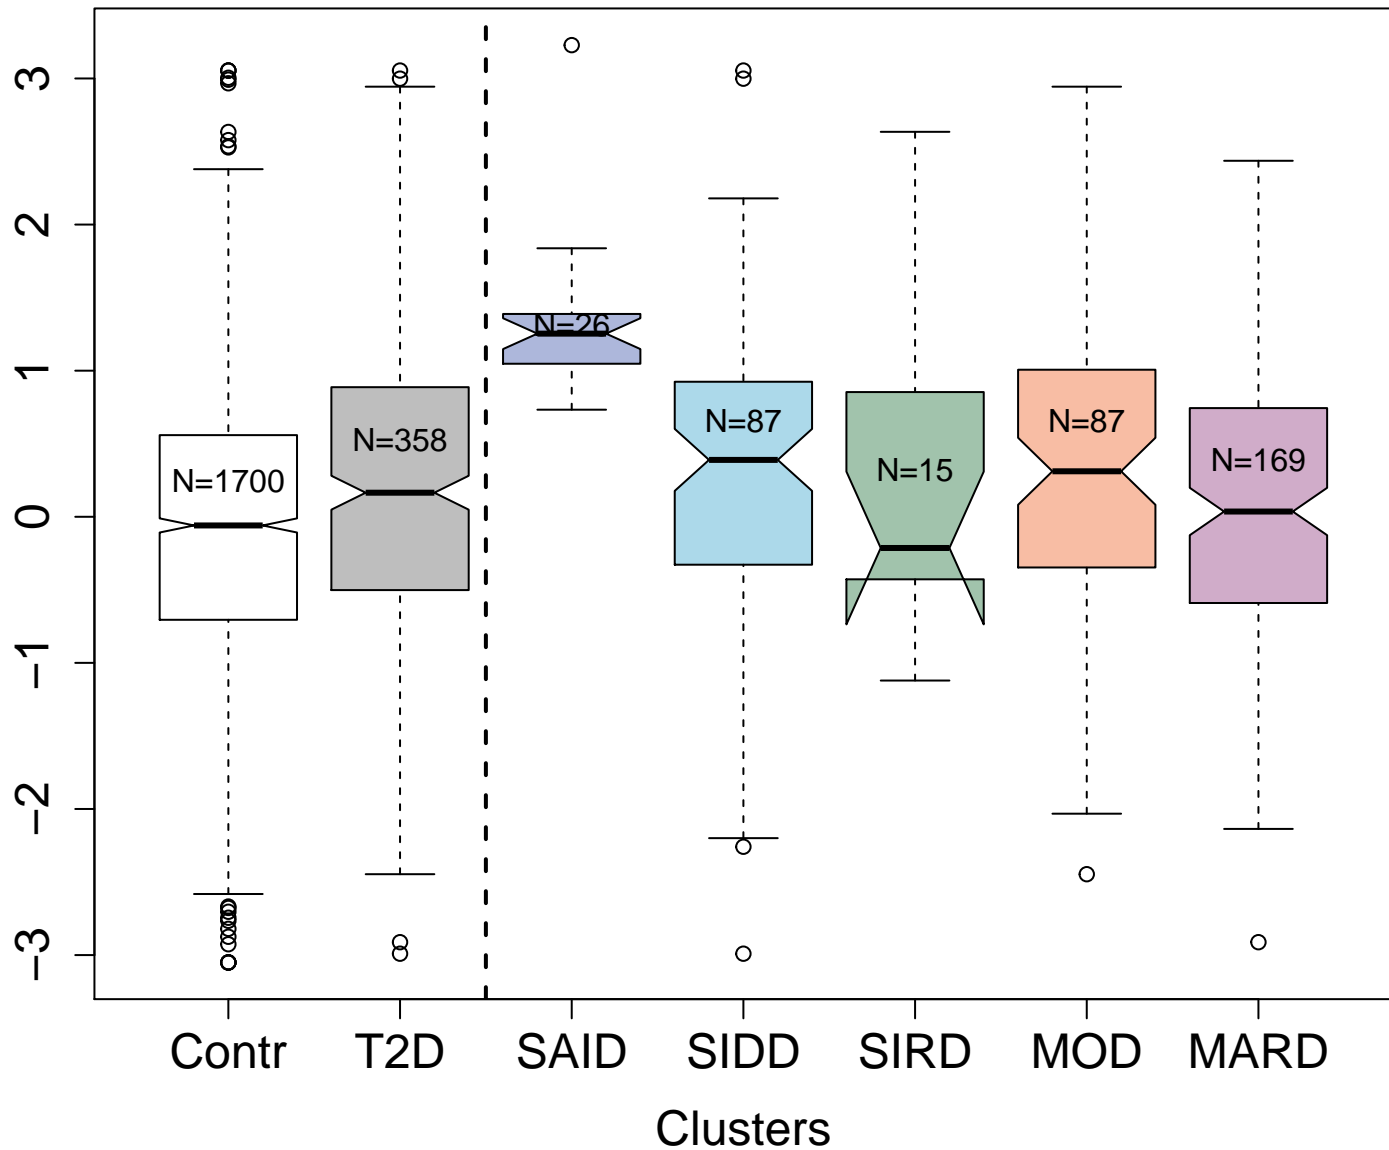

M62921 : pregnenetriol disulfate\*

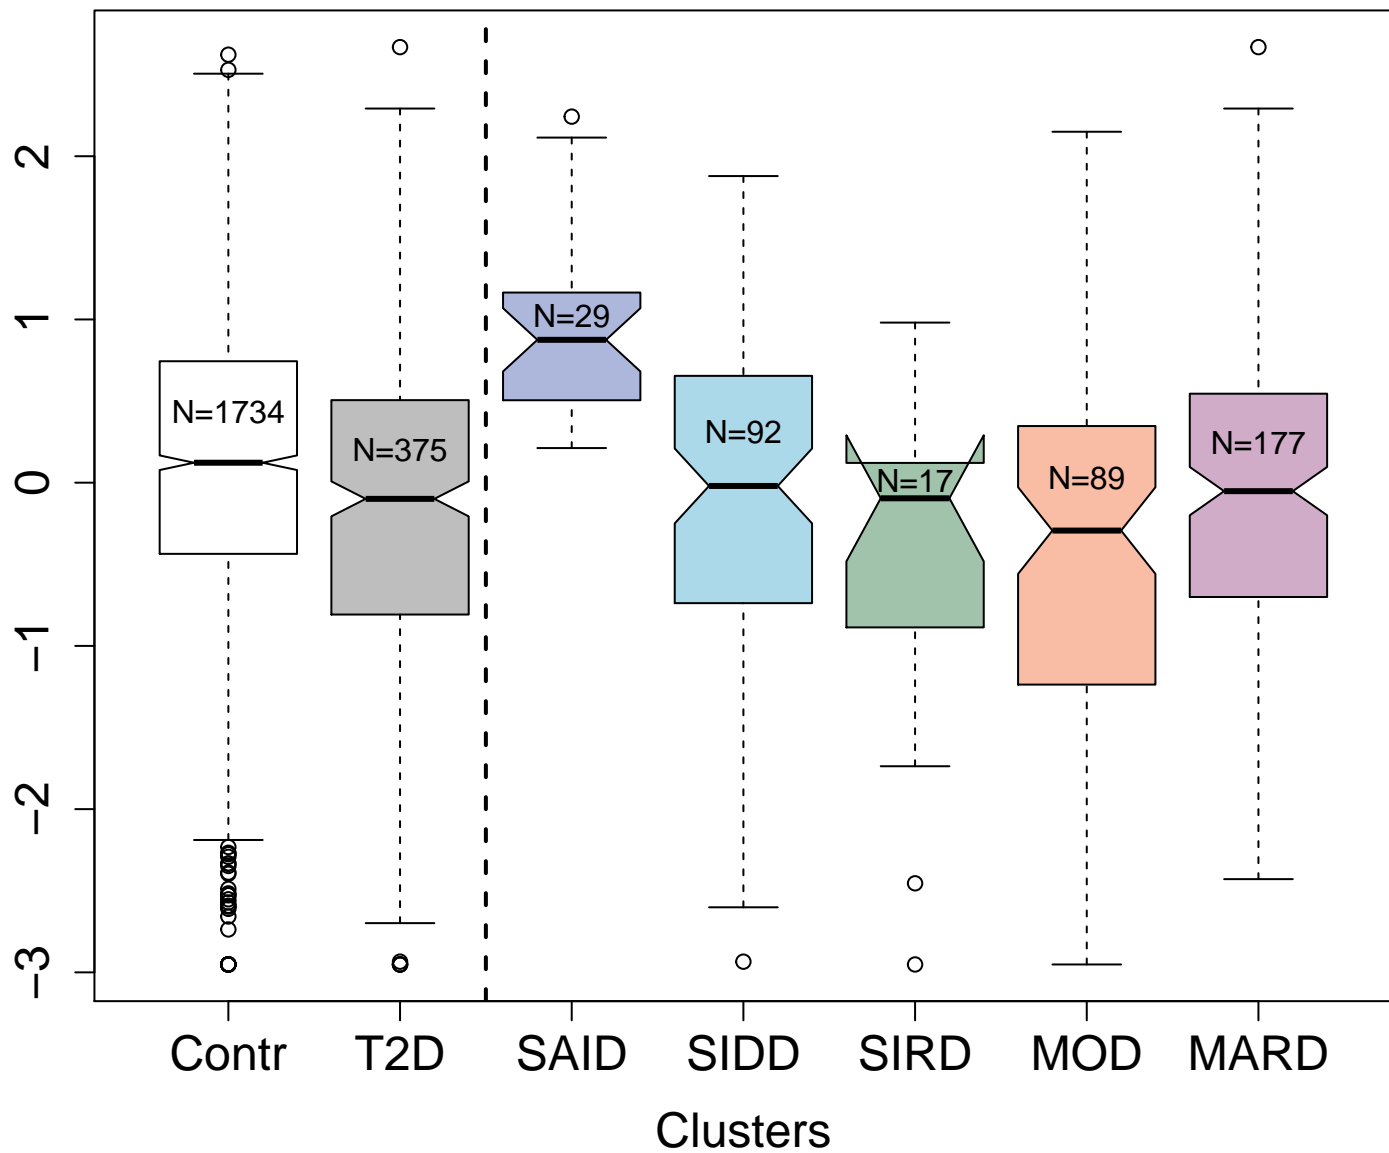

M46507 : X - 11850

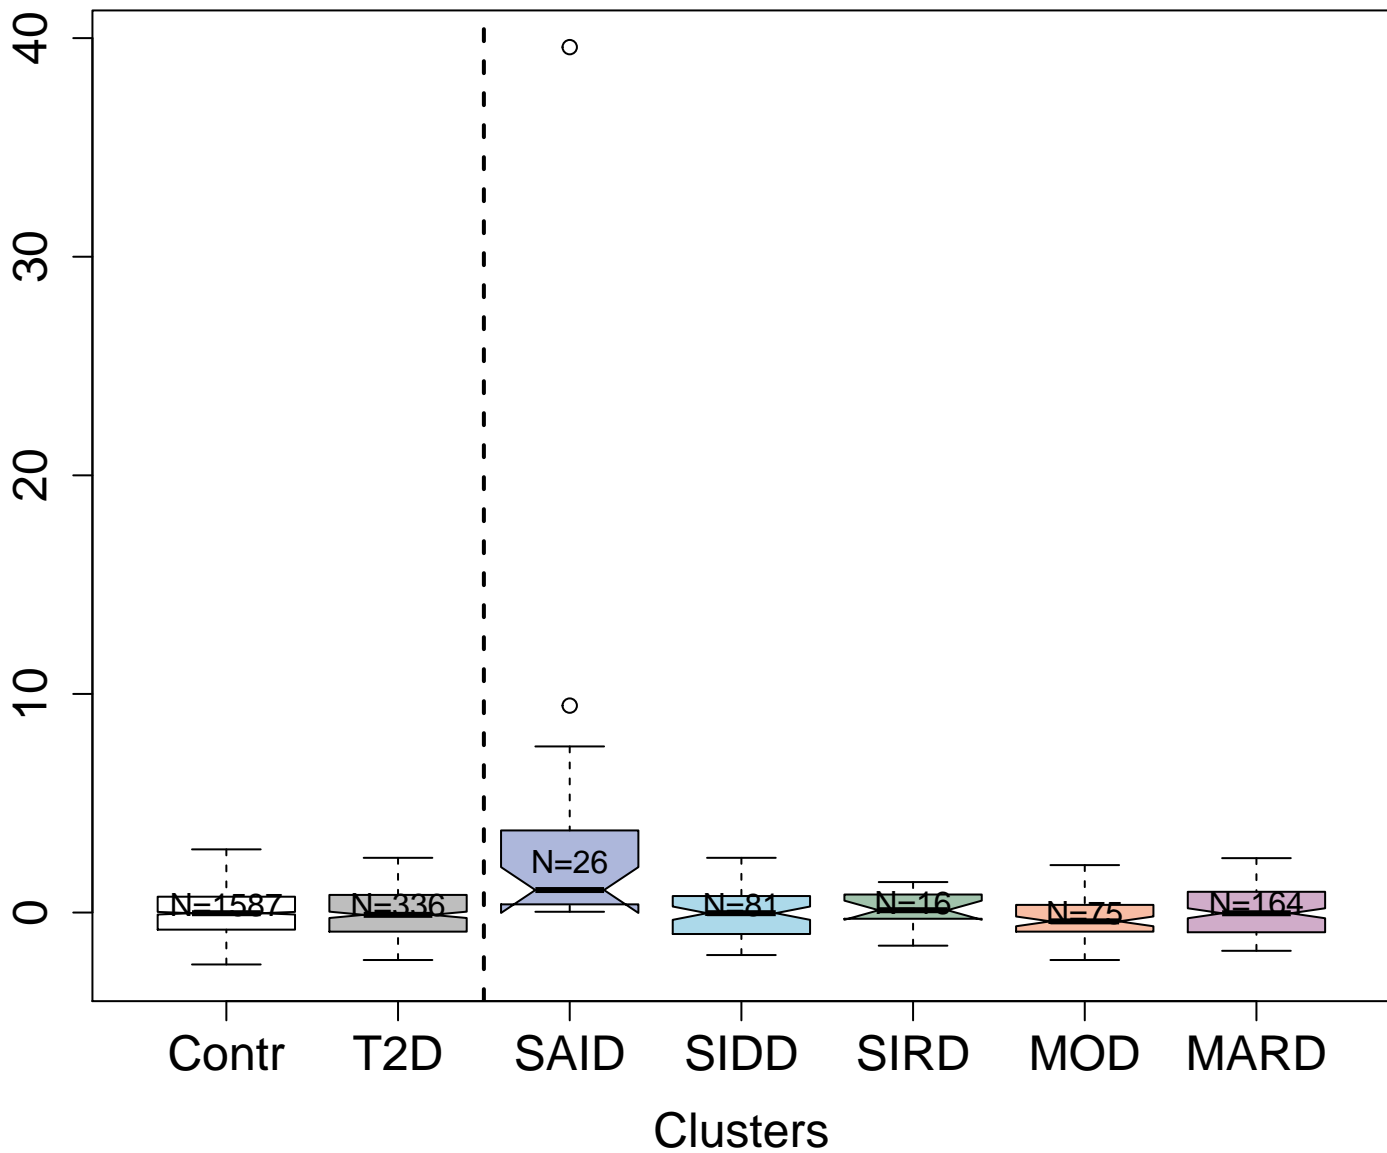

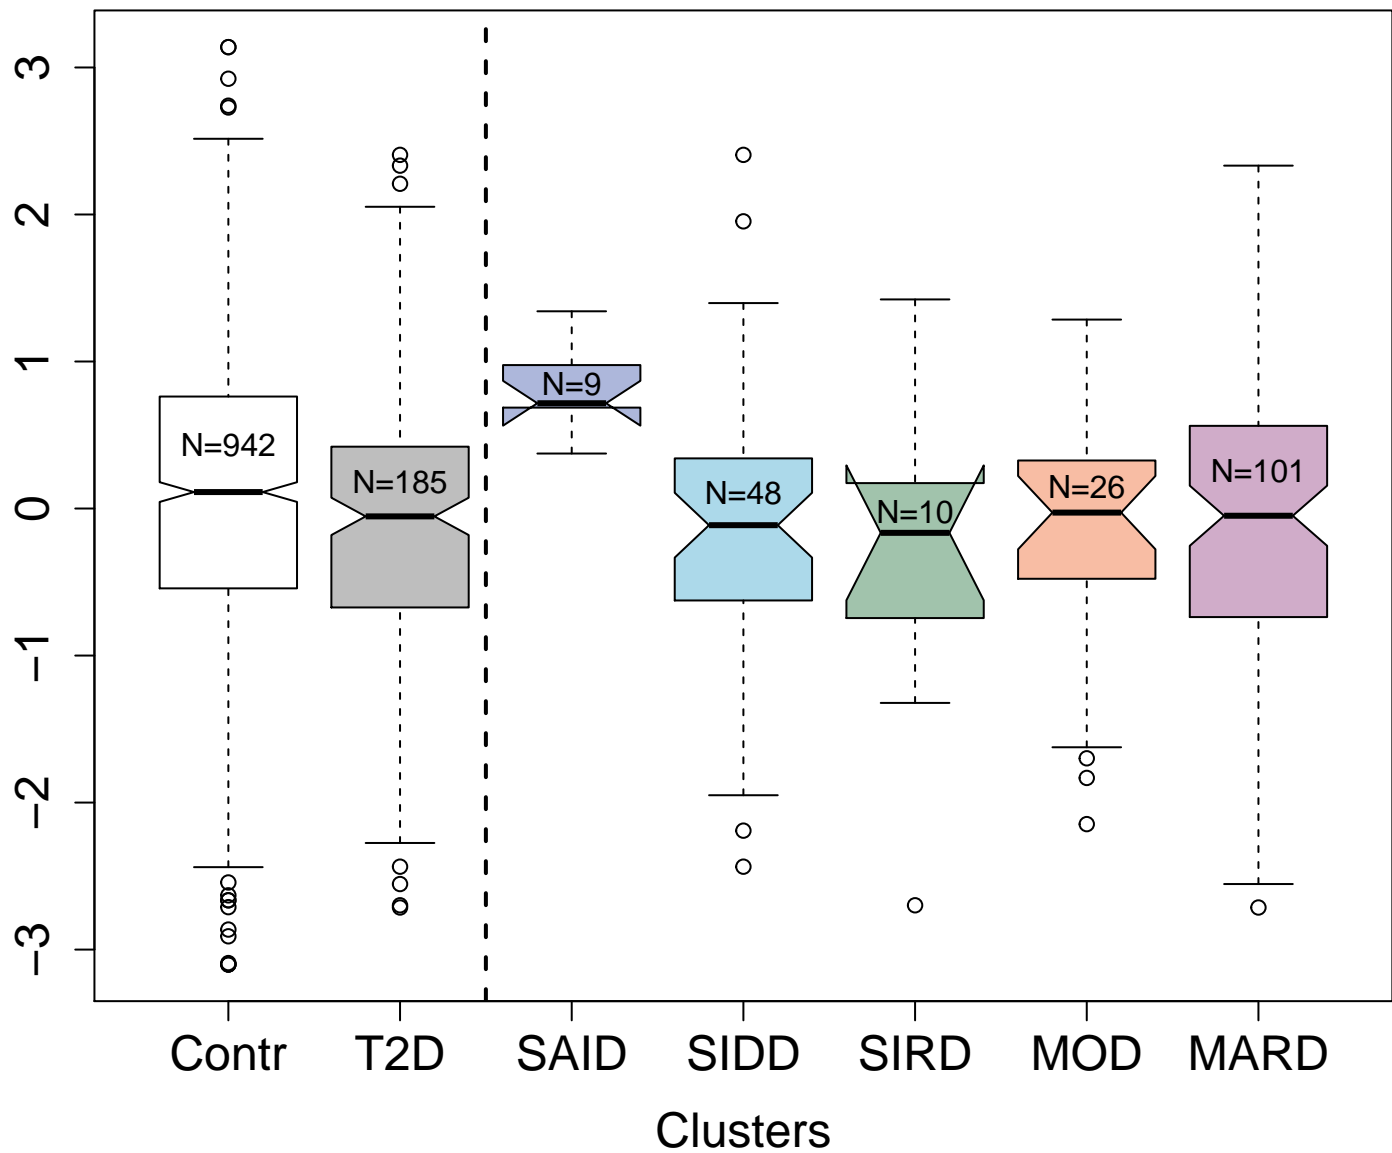

M62798 : 4-acetylcatechol sulfate (1)

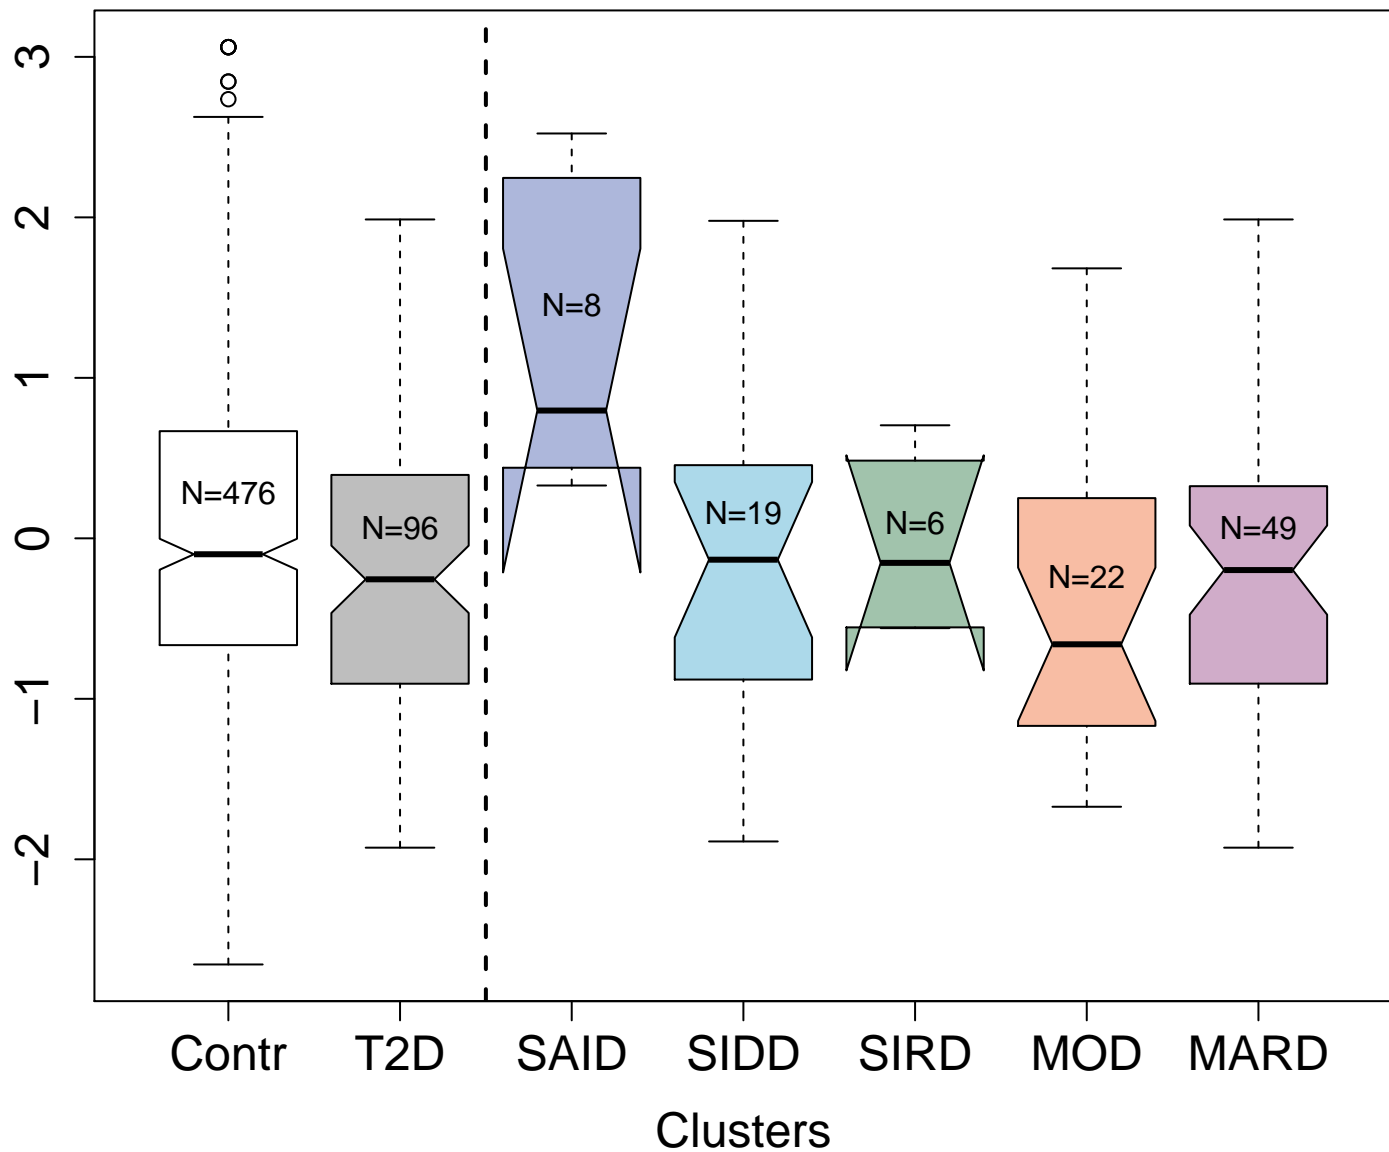

M17665 : p-hydroxybenzaldehyde

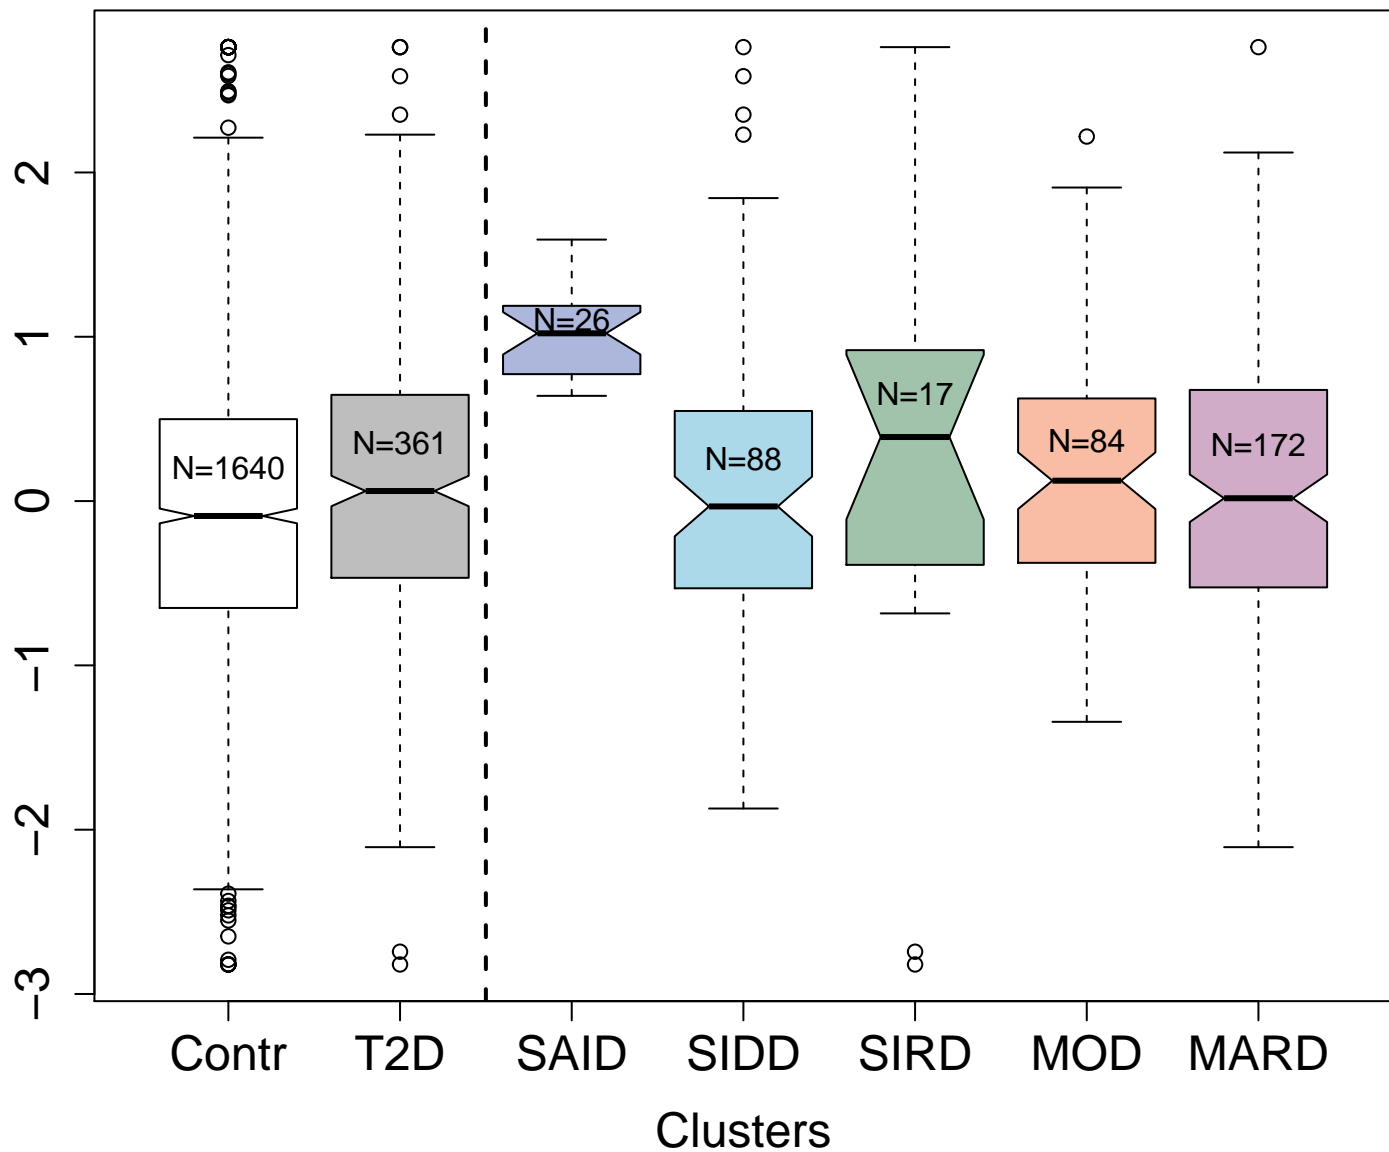



M37530 : leukotriene B4

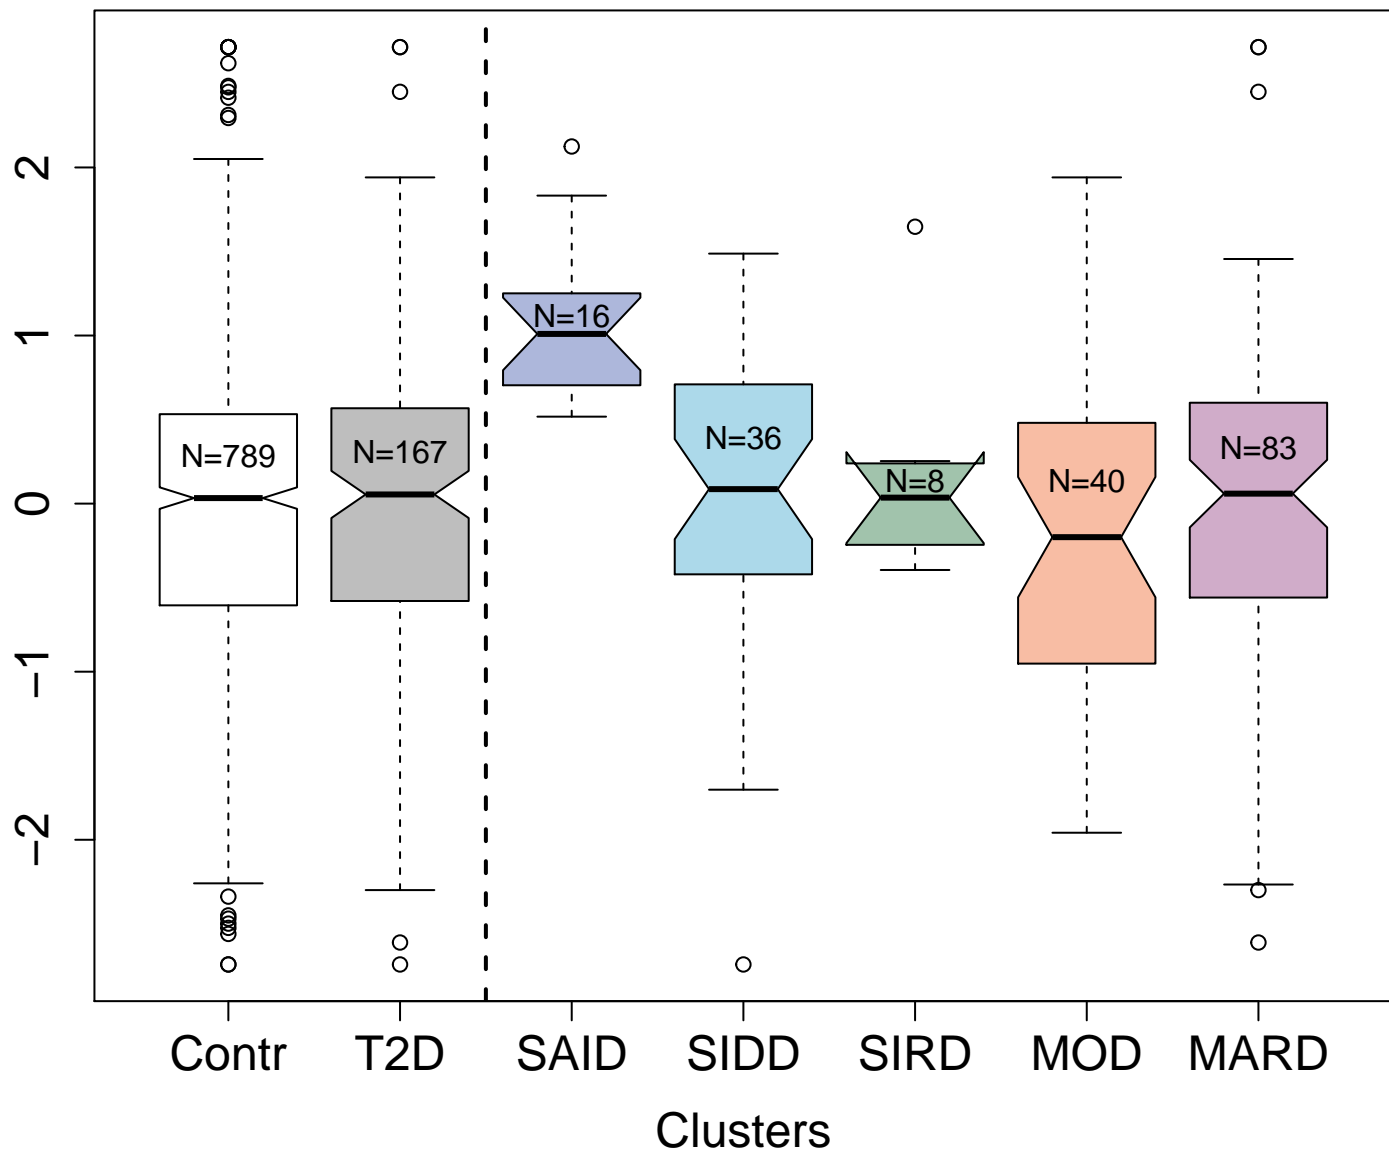

M44877 : N-palmitoyl-sphingosine (d18:1/16:0)

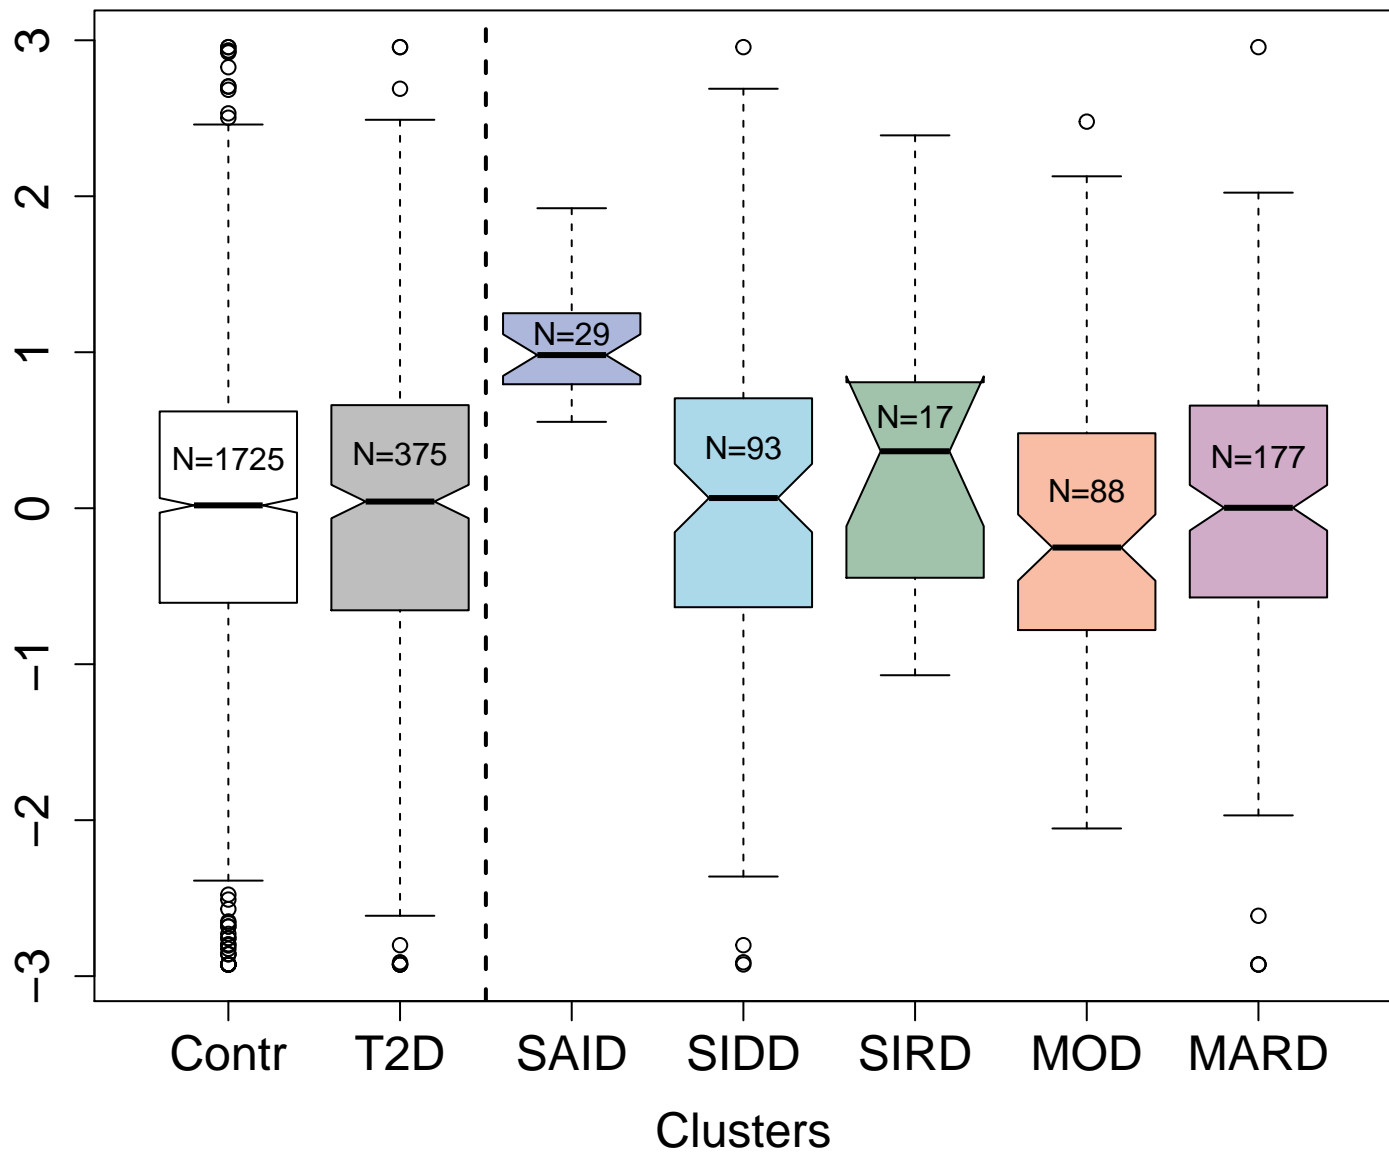

M47478 : X - 10458

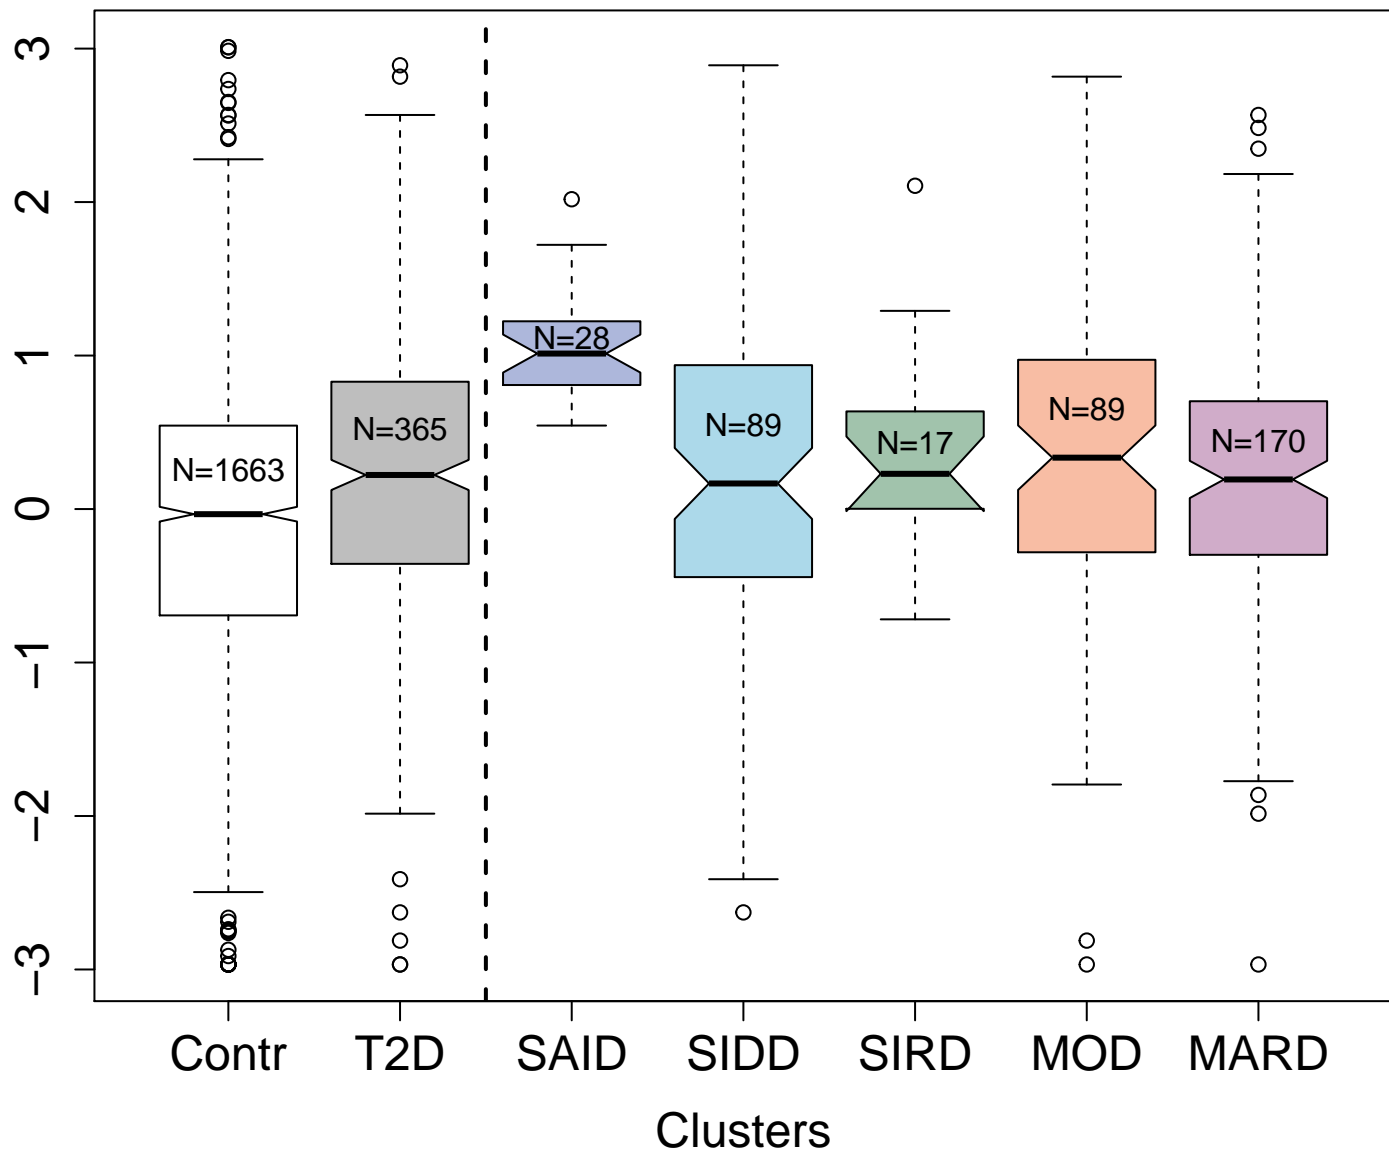

M61866 : heptenedioate (C7:1-DC)\*

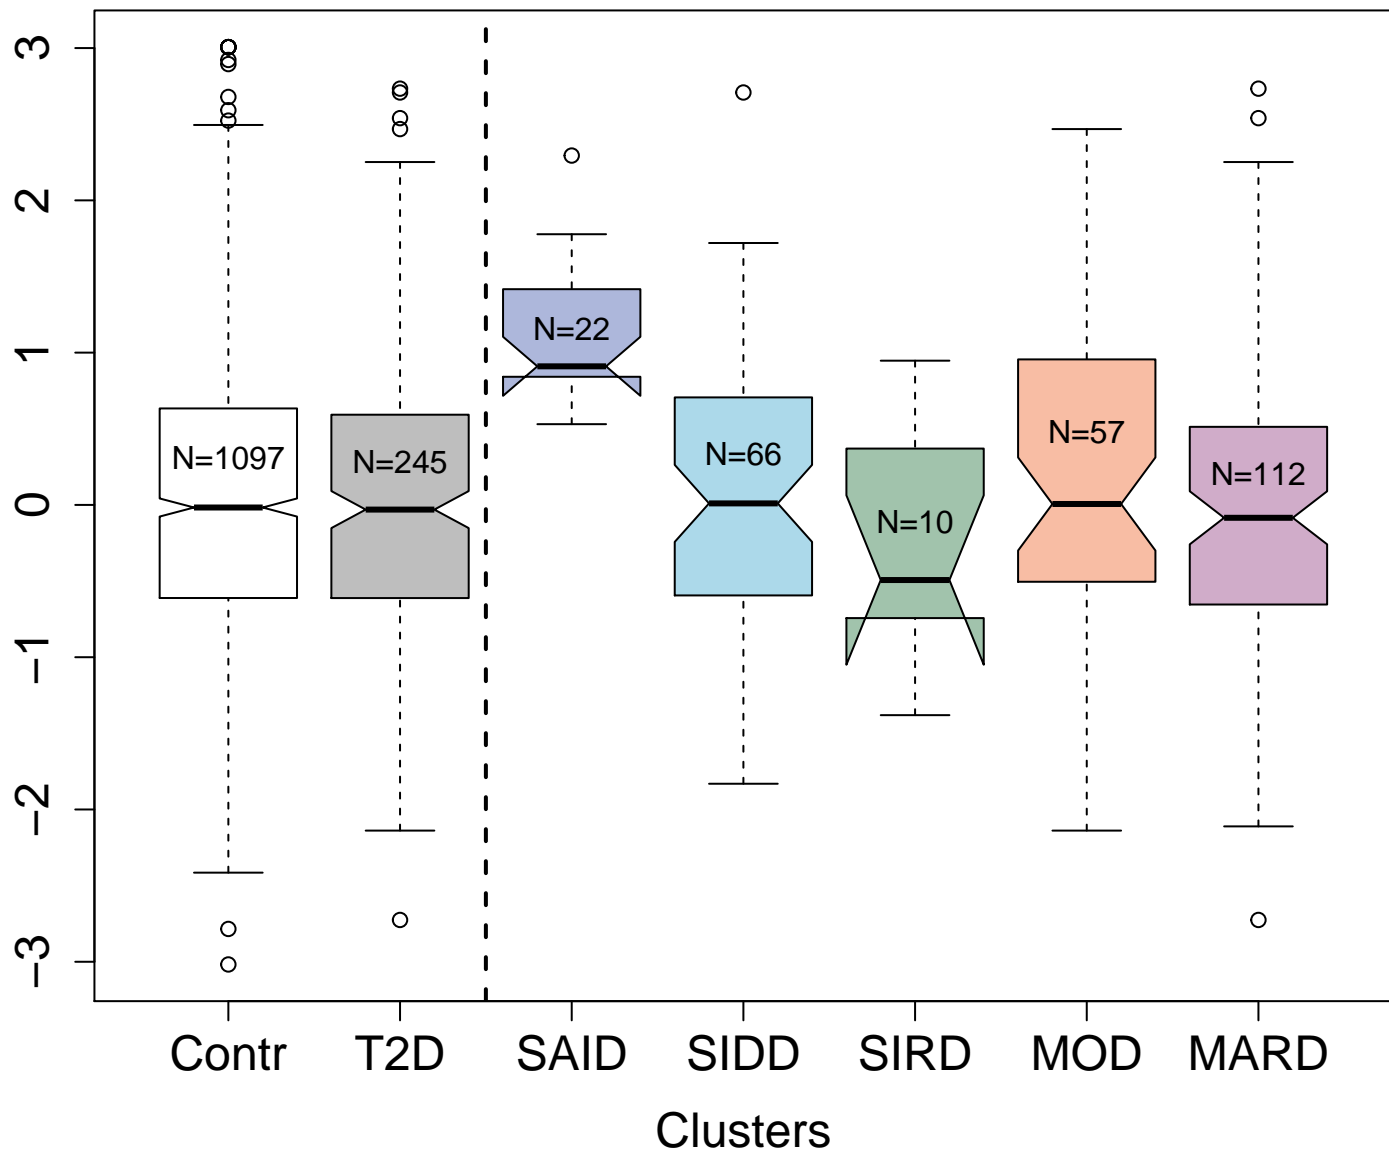

M57711 : HWESASXX\*

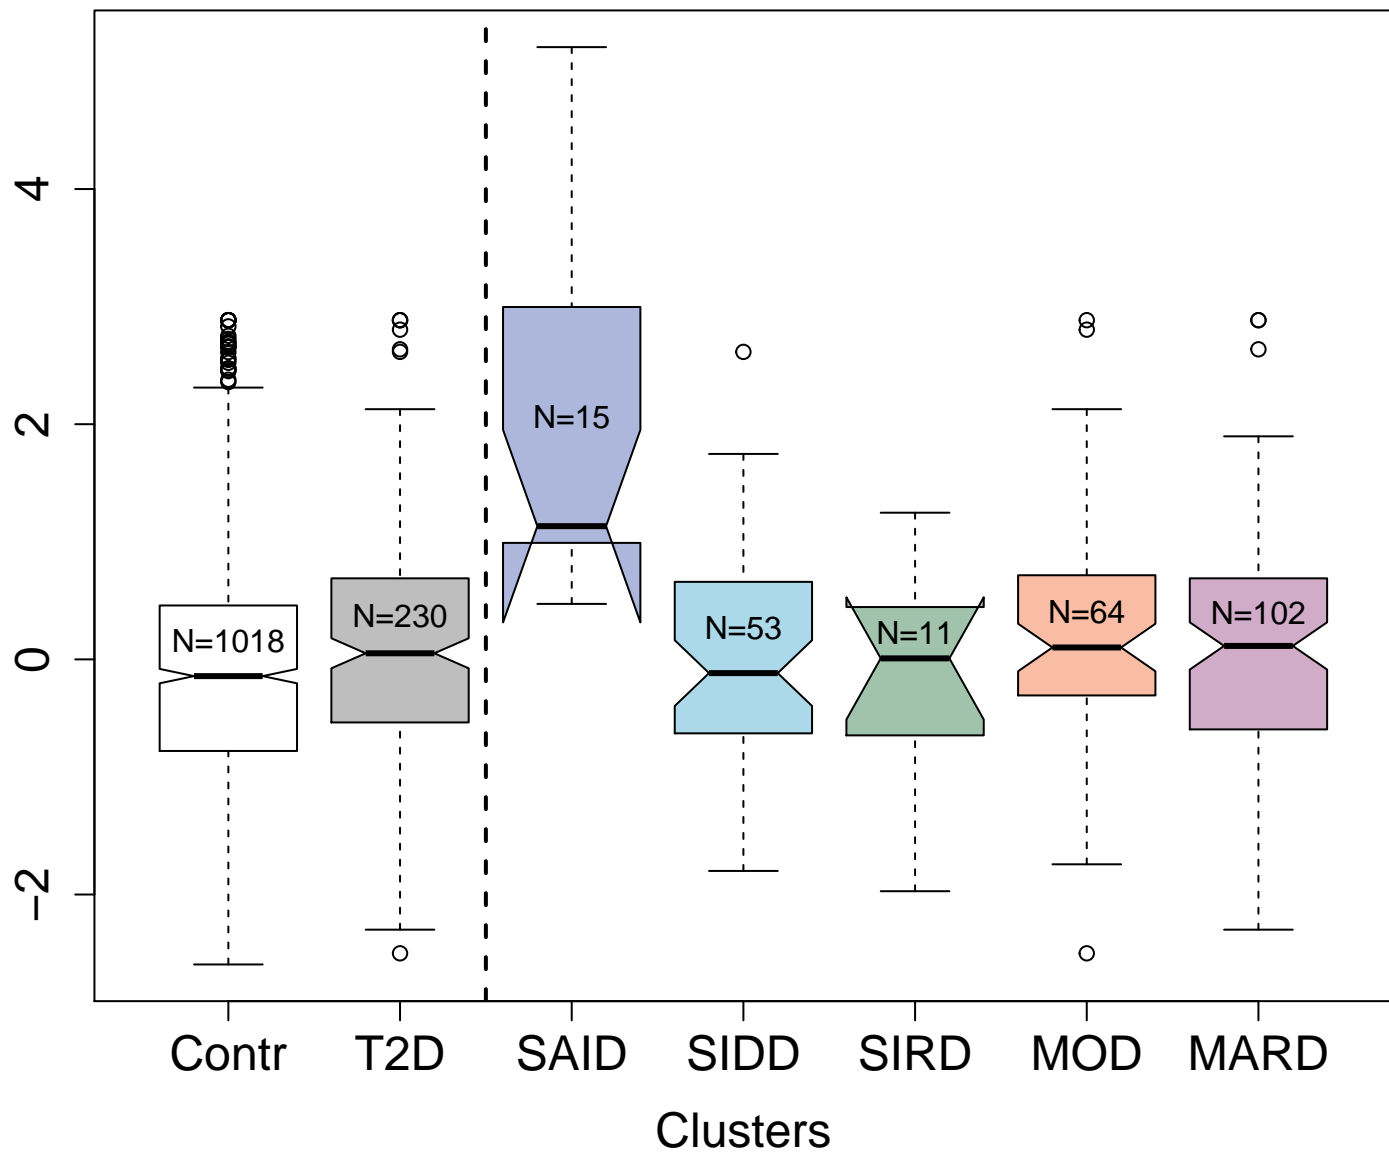

M62853 : 3-amino-2-piperidone

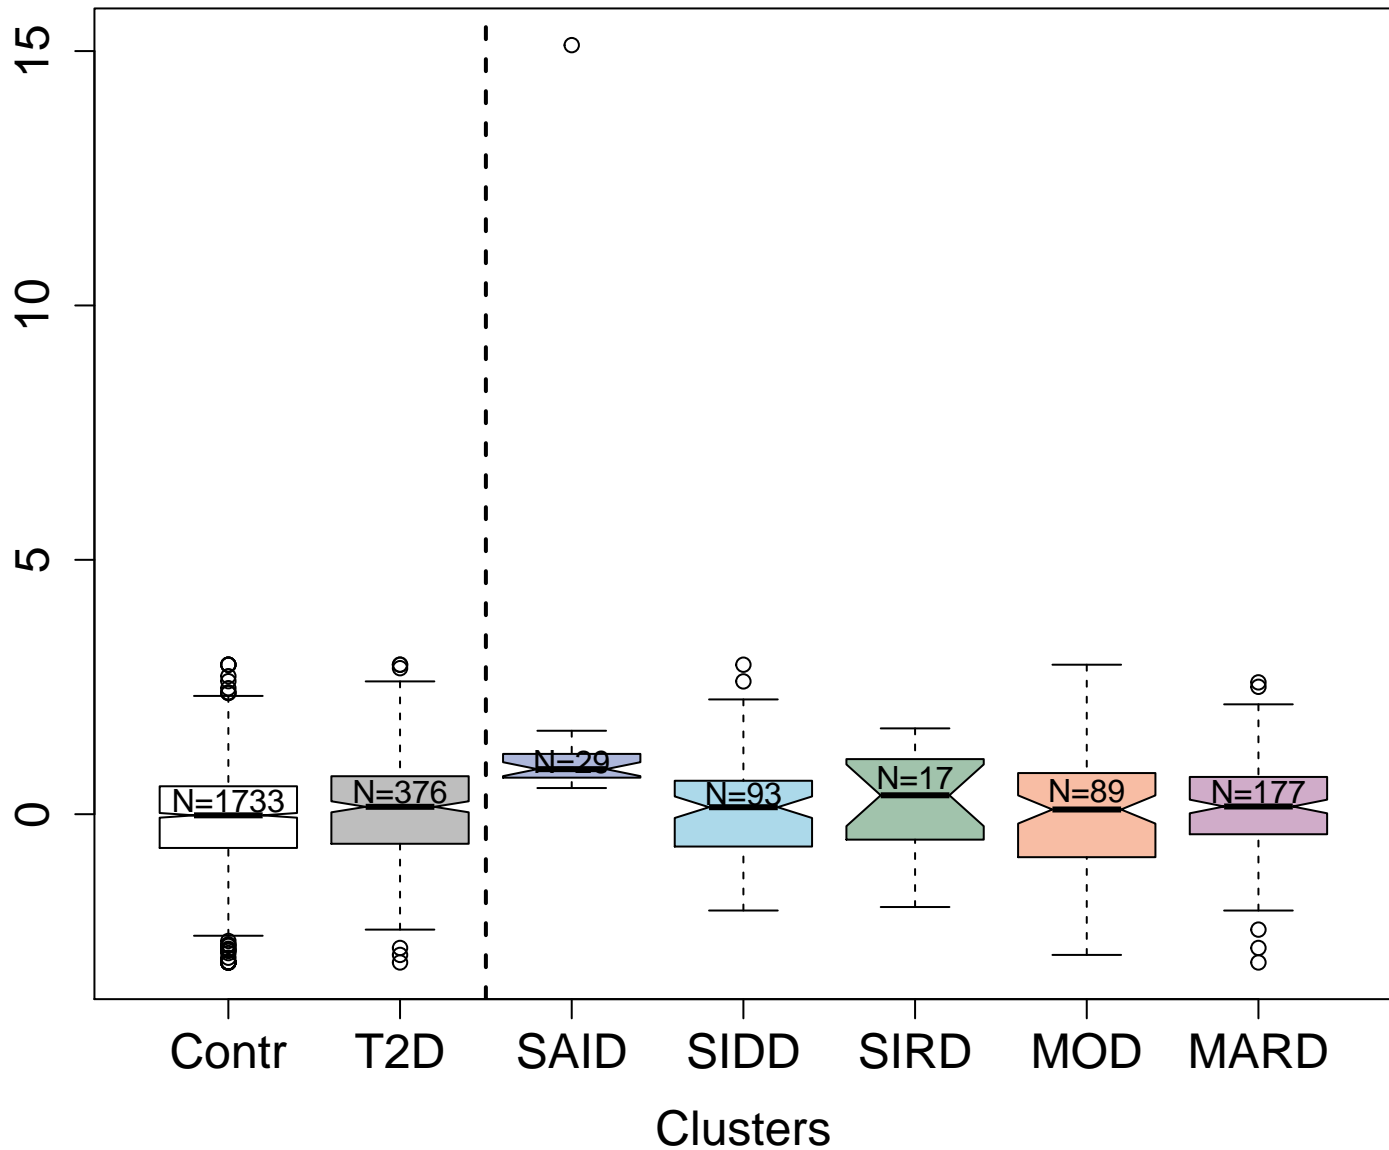

M32562 : pregnenediol disulfate (C21H34O8S2)\*

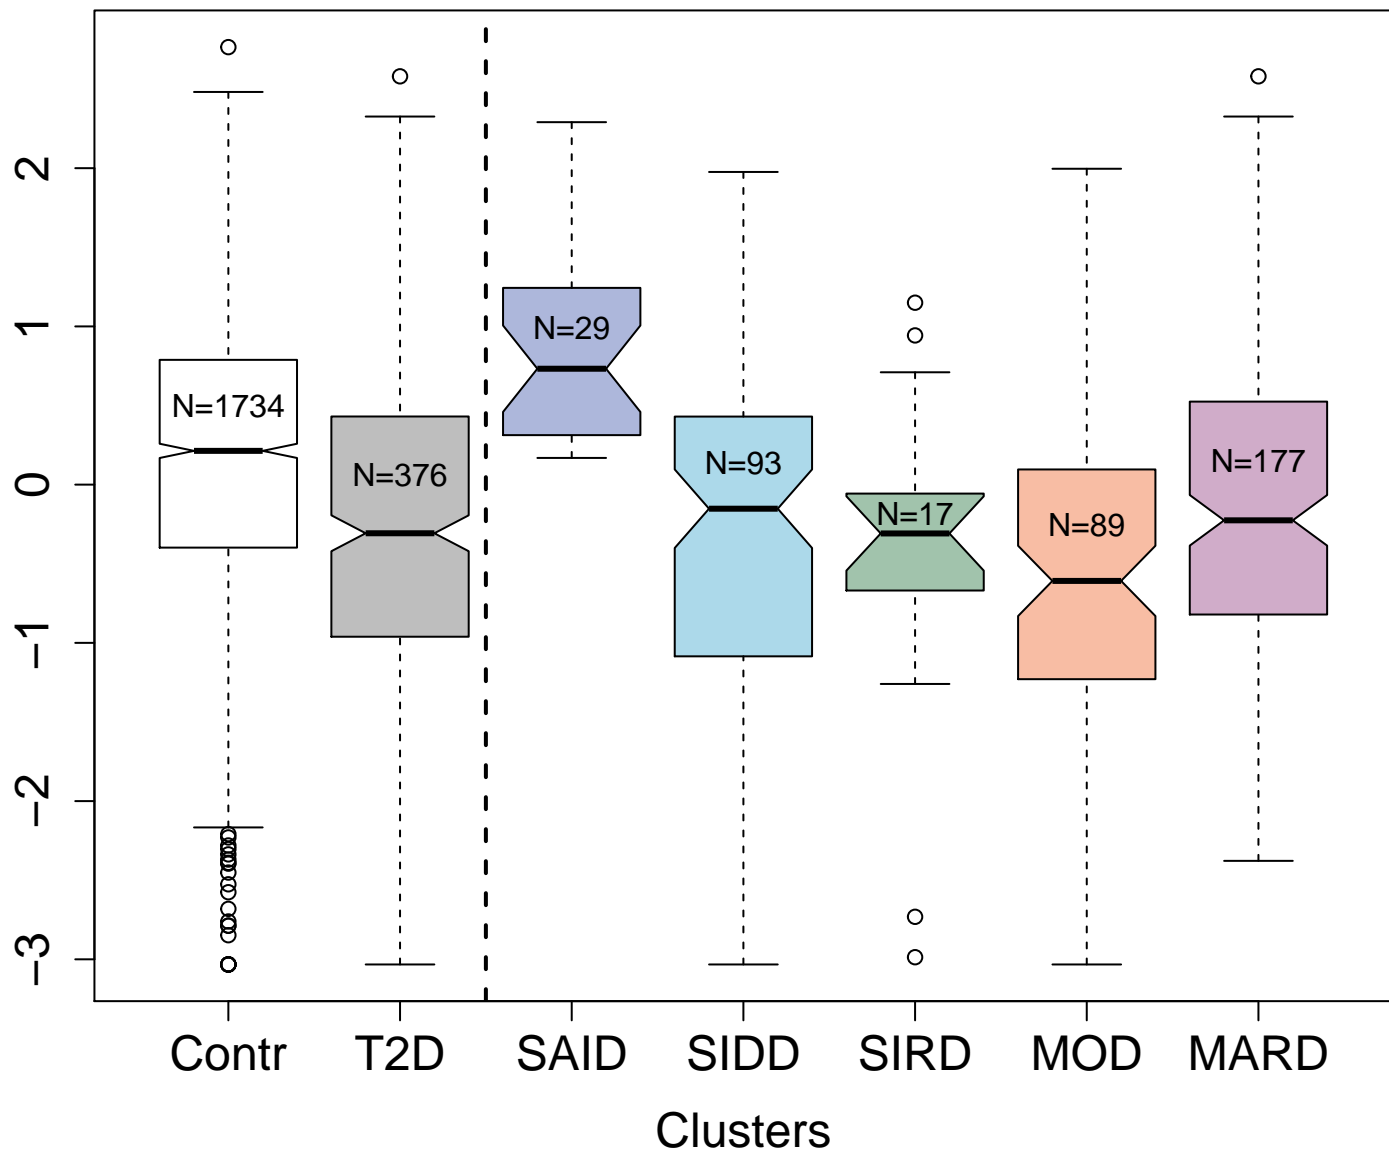

M46984 : X - 21807

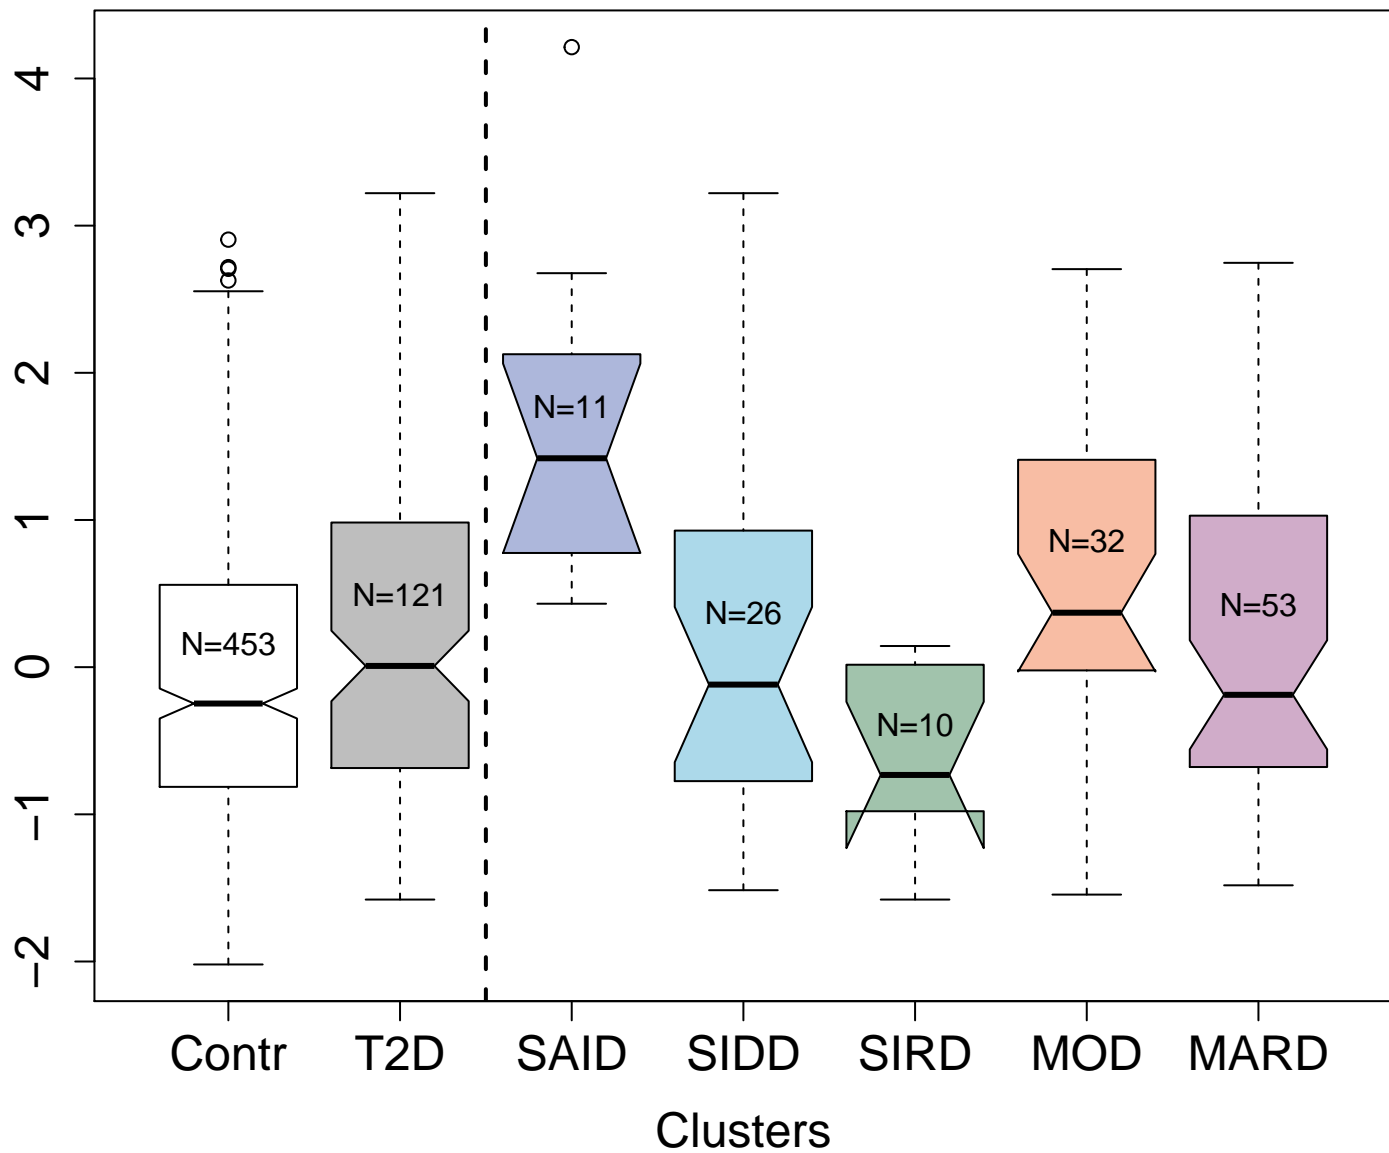



M27447 : 1-linoleoylglycerol (18:2)

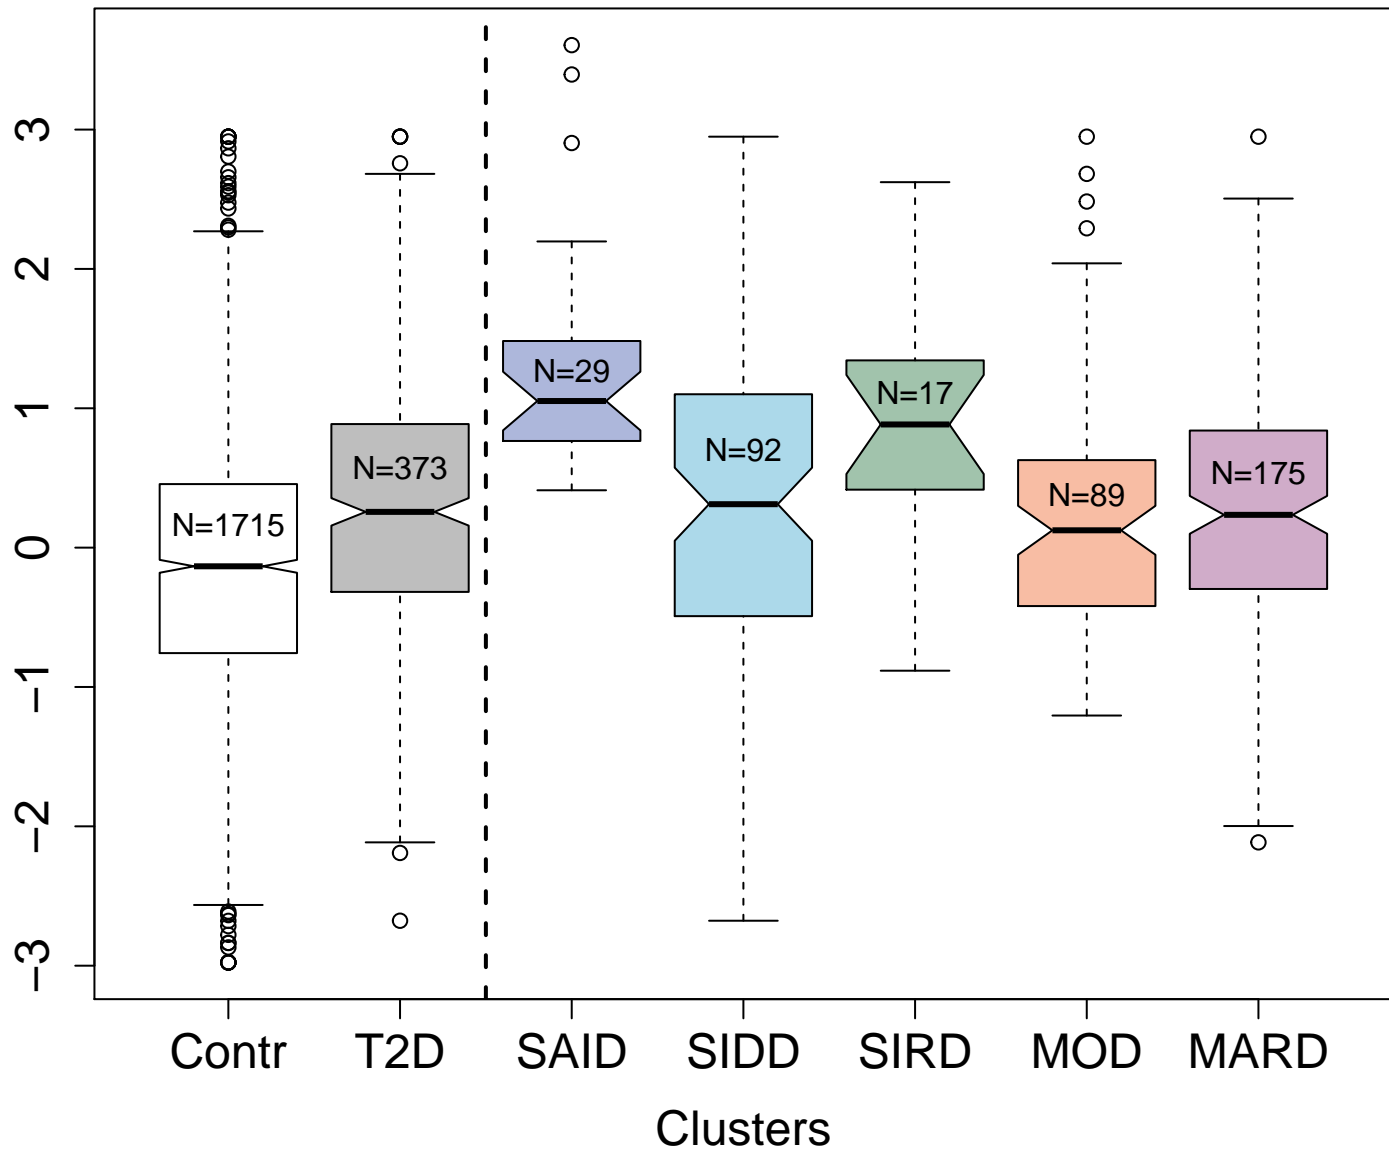

M44876 : gamma-CEHC

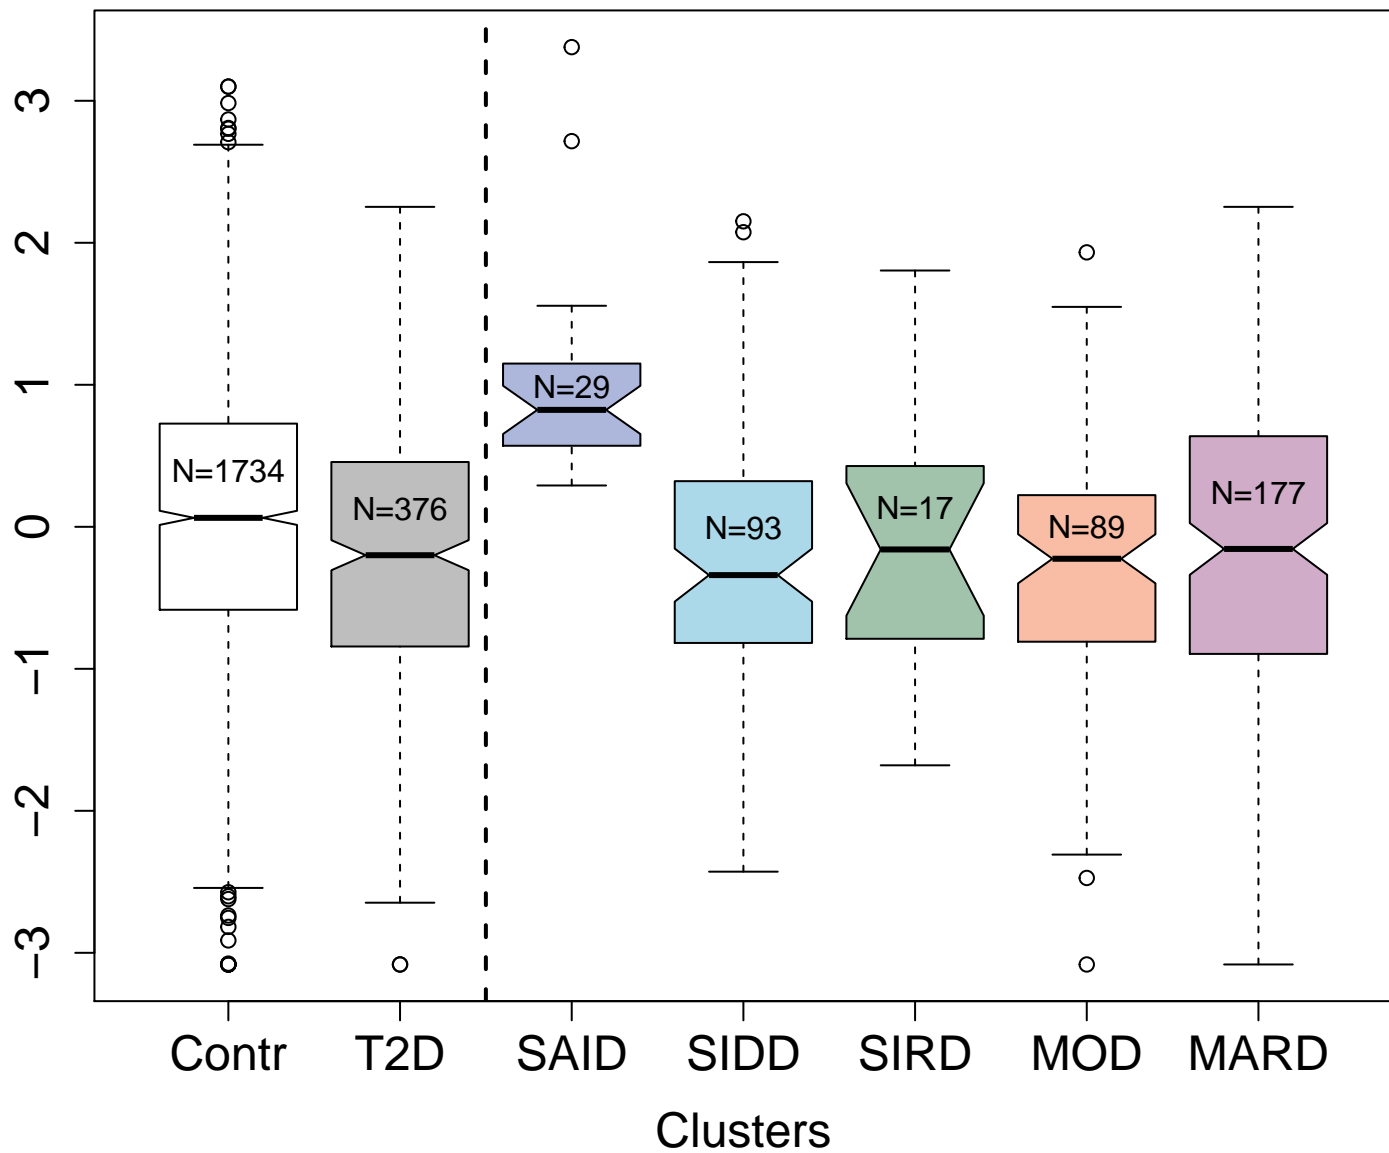

M53013 : glycosyl-N-palmitoyl-sphingosine (d18:1/16:0)

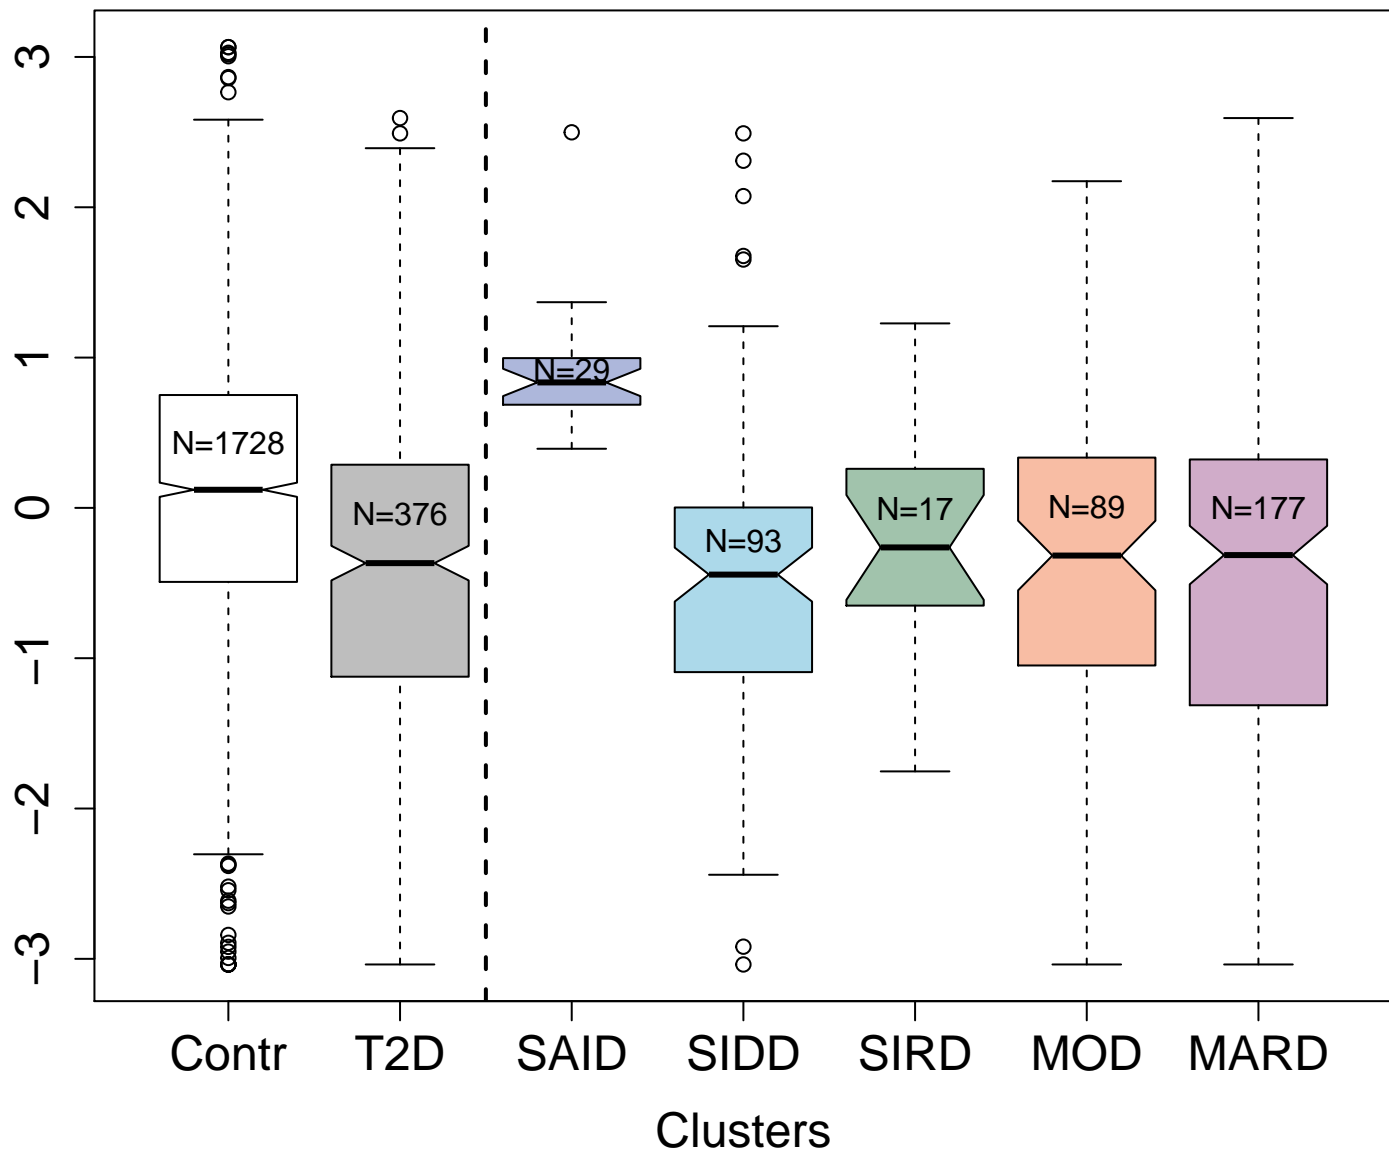

M52431 : 1-palmitoleoylglycerol (16:1)\*

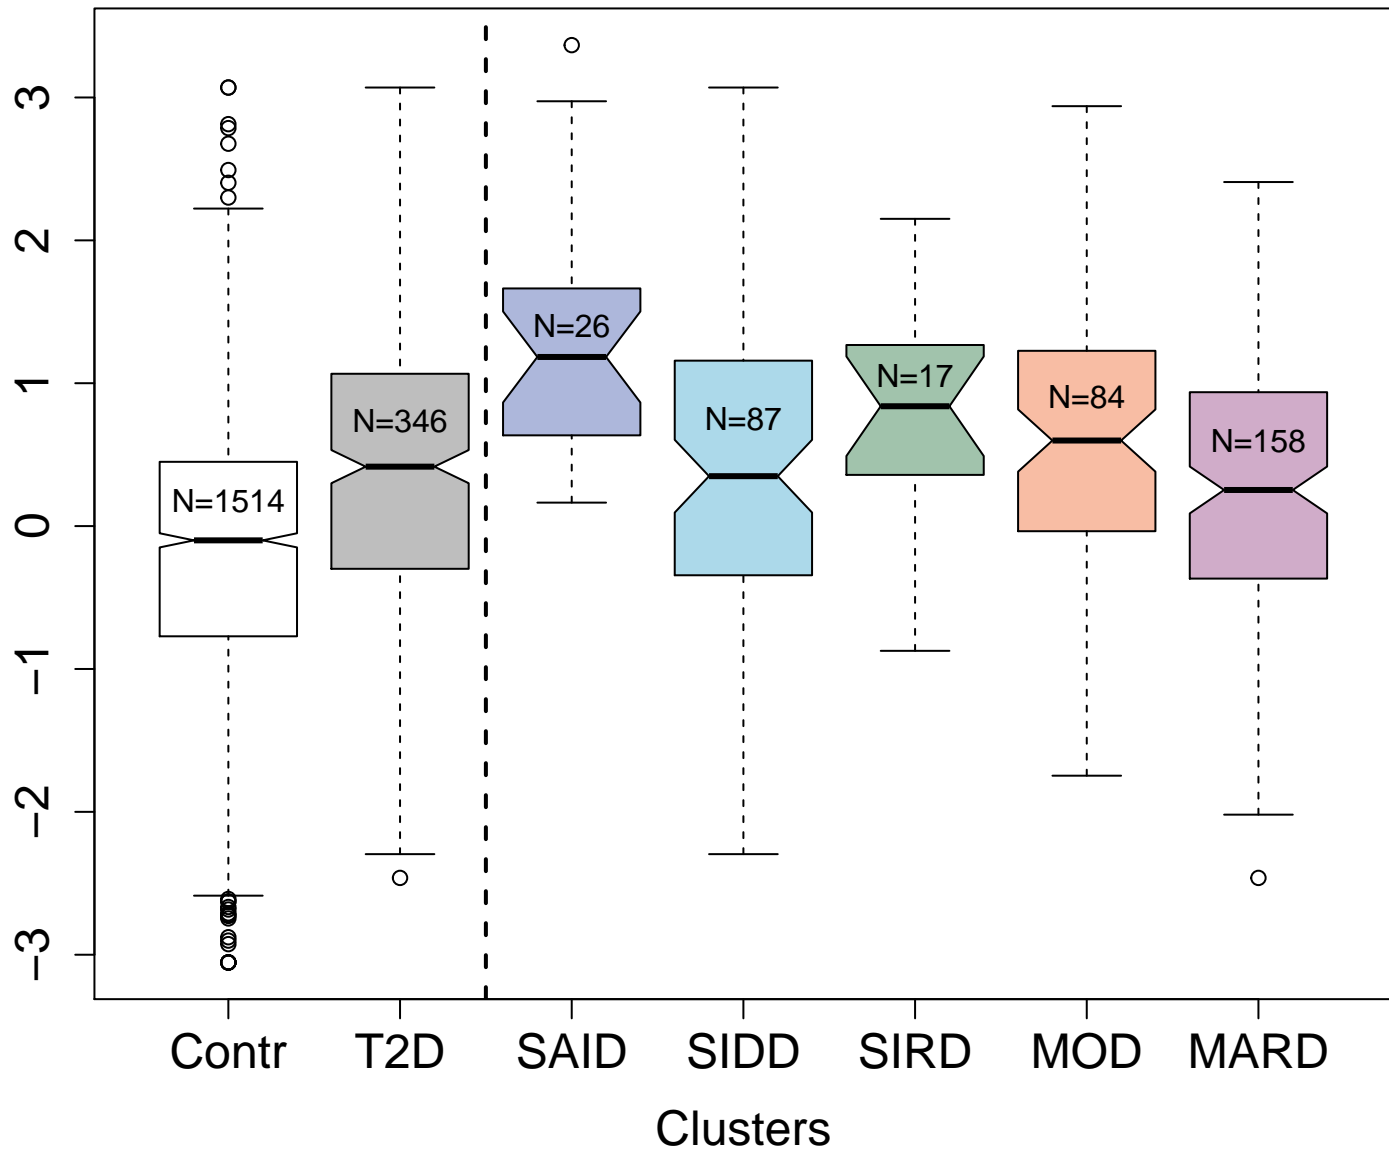

M53065 : X - 24637

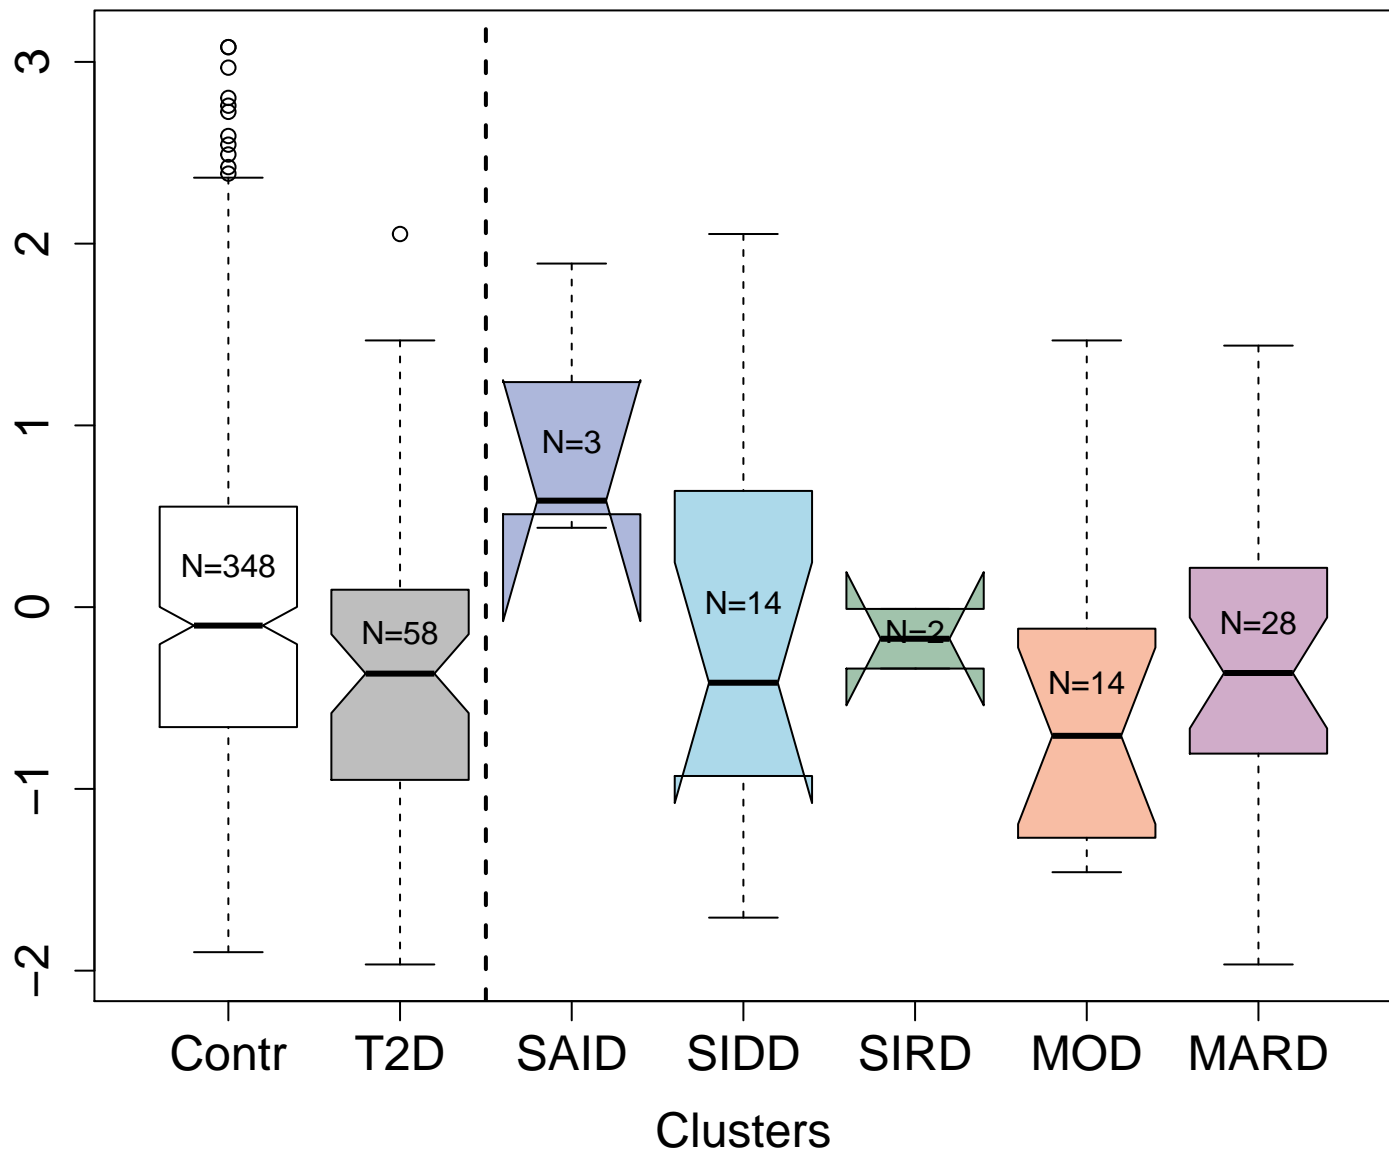

M22206 : theanine

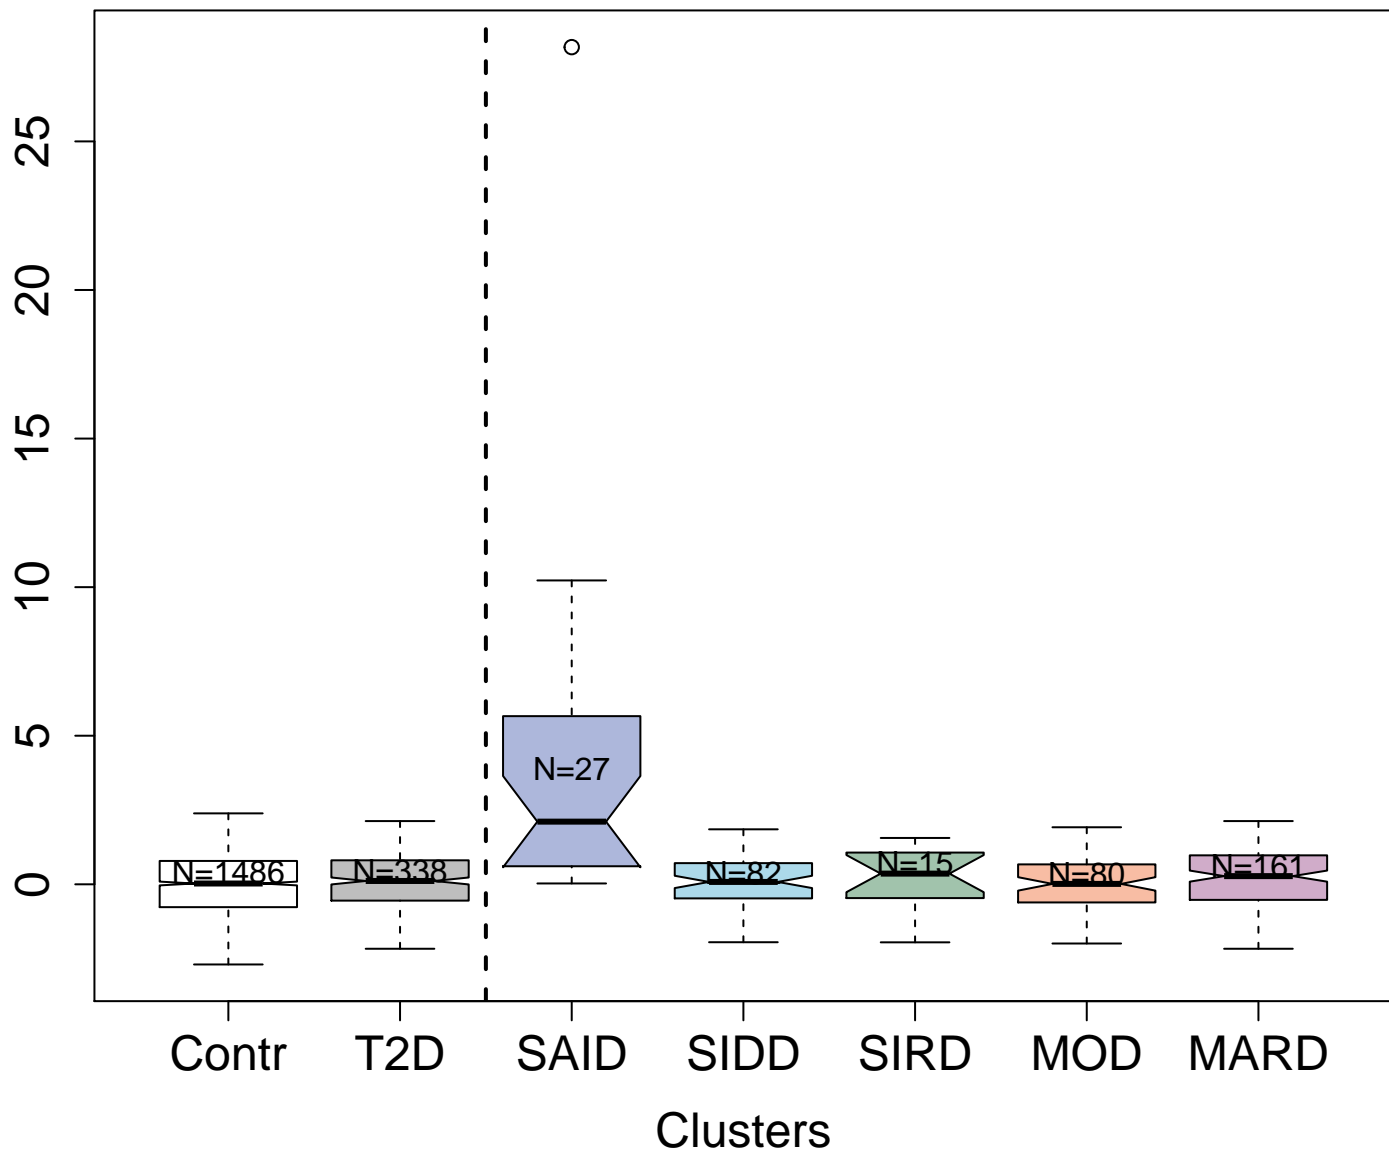

M57747 : 3-methylglutaconate

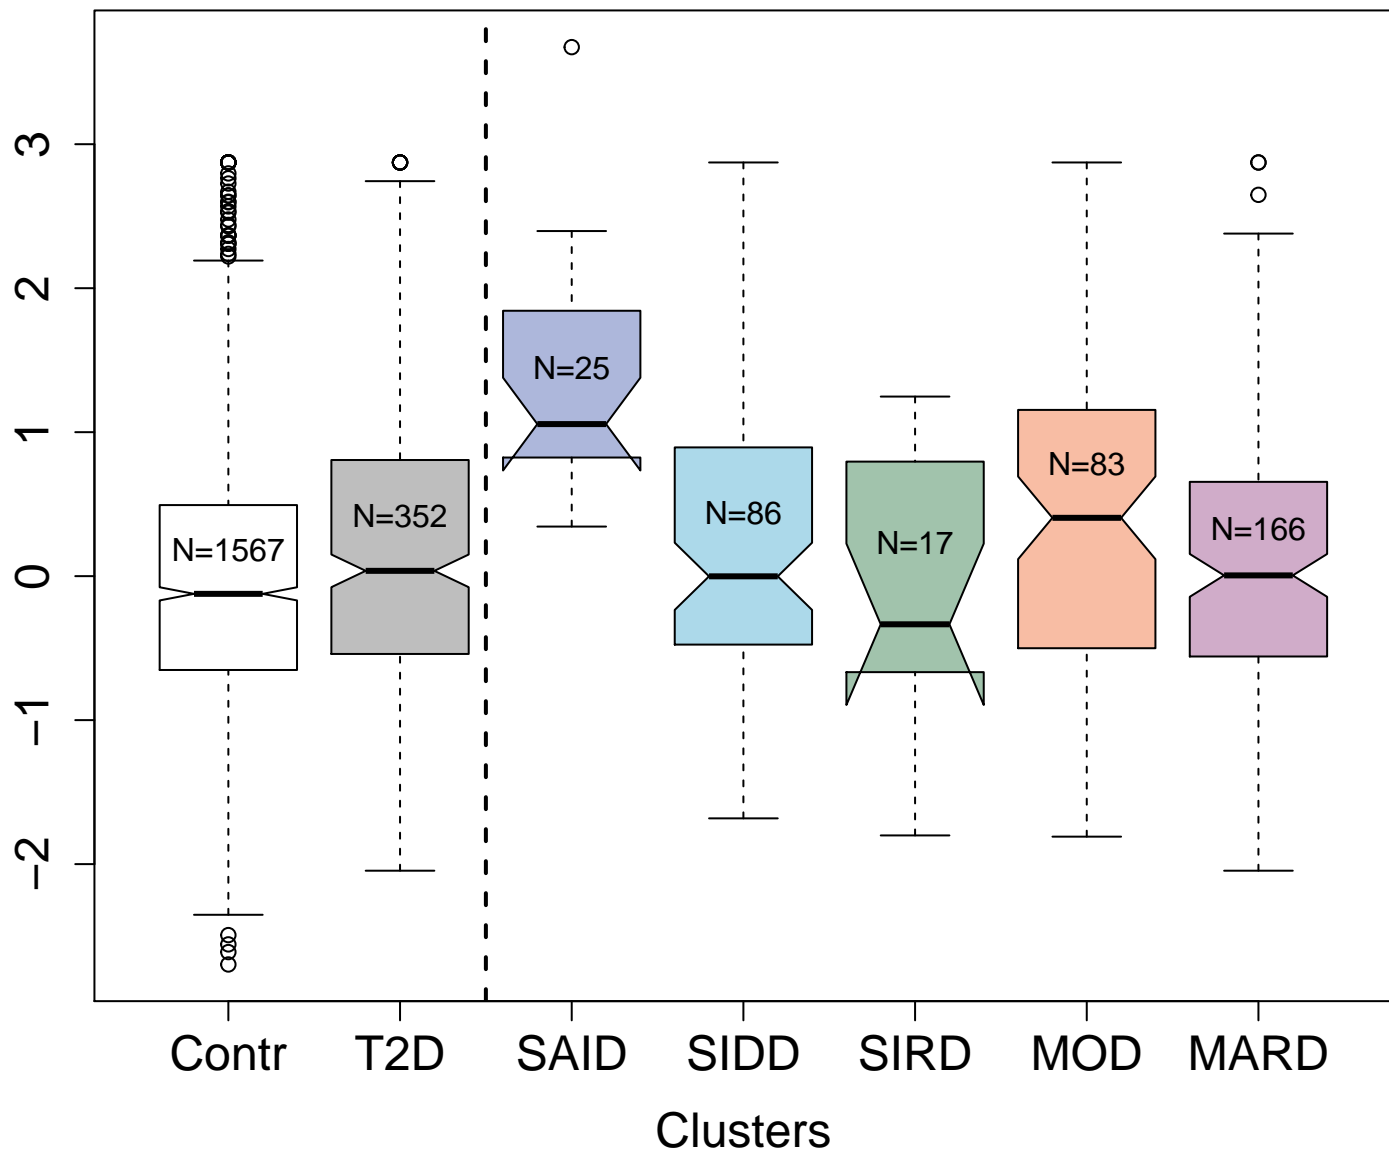

M5983 : corticosterone

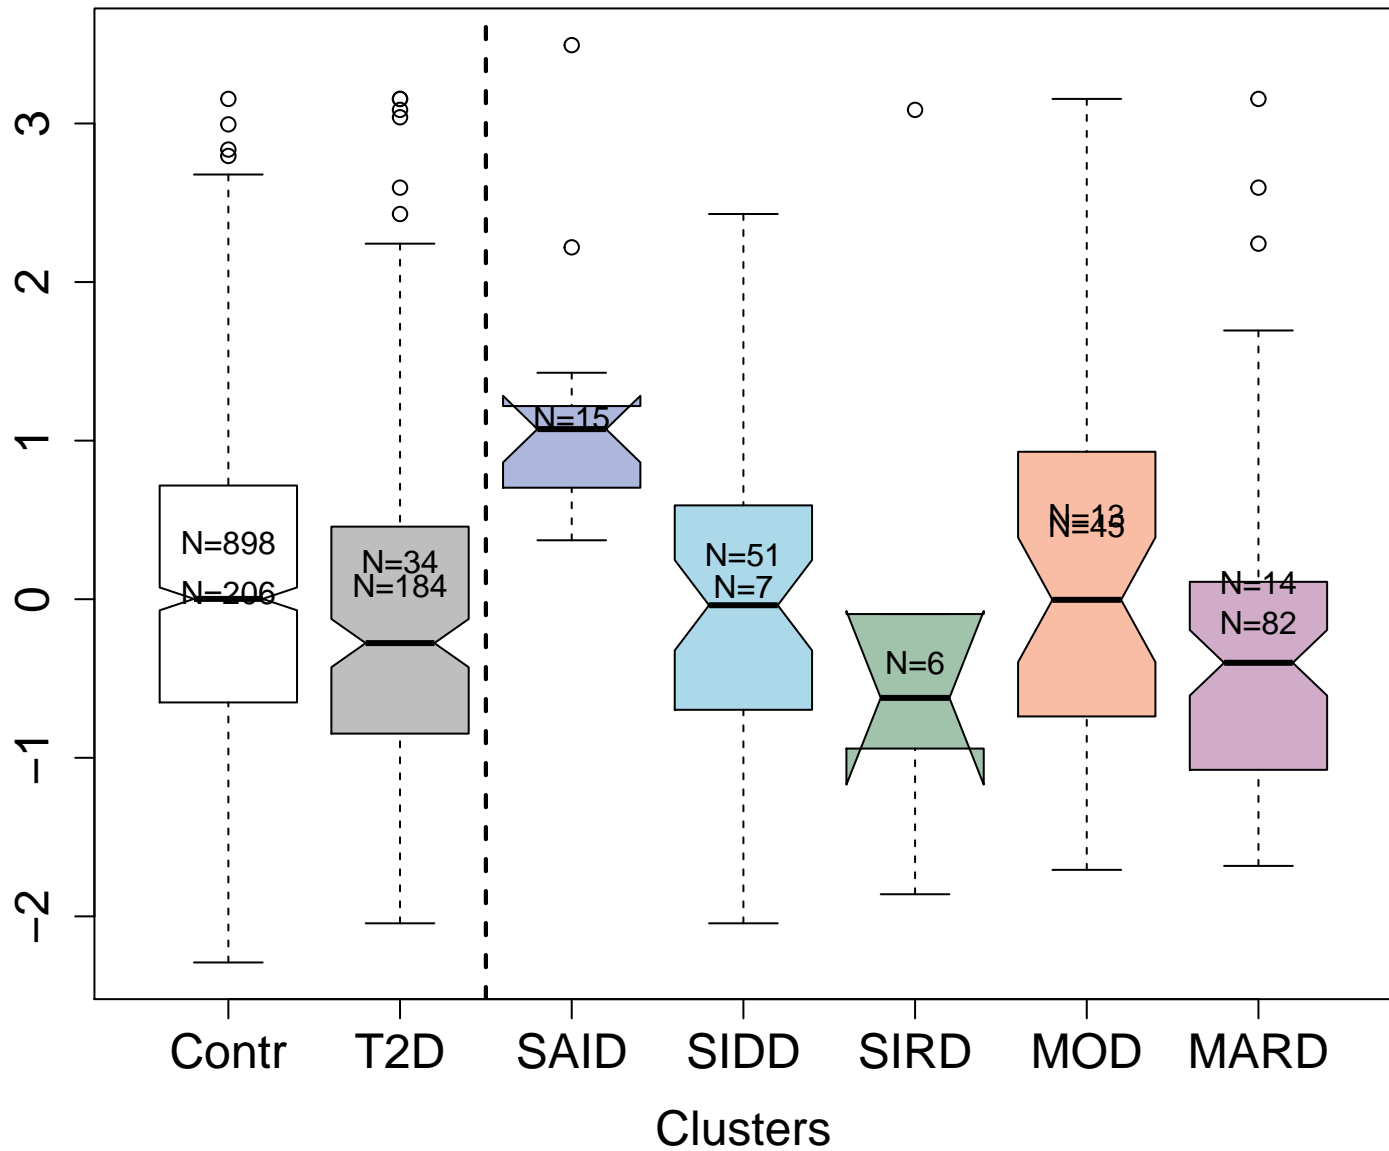



M15753 : hippurate

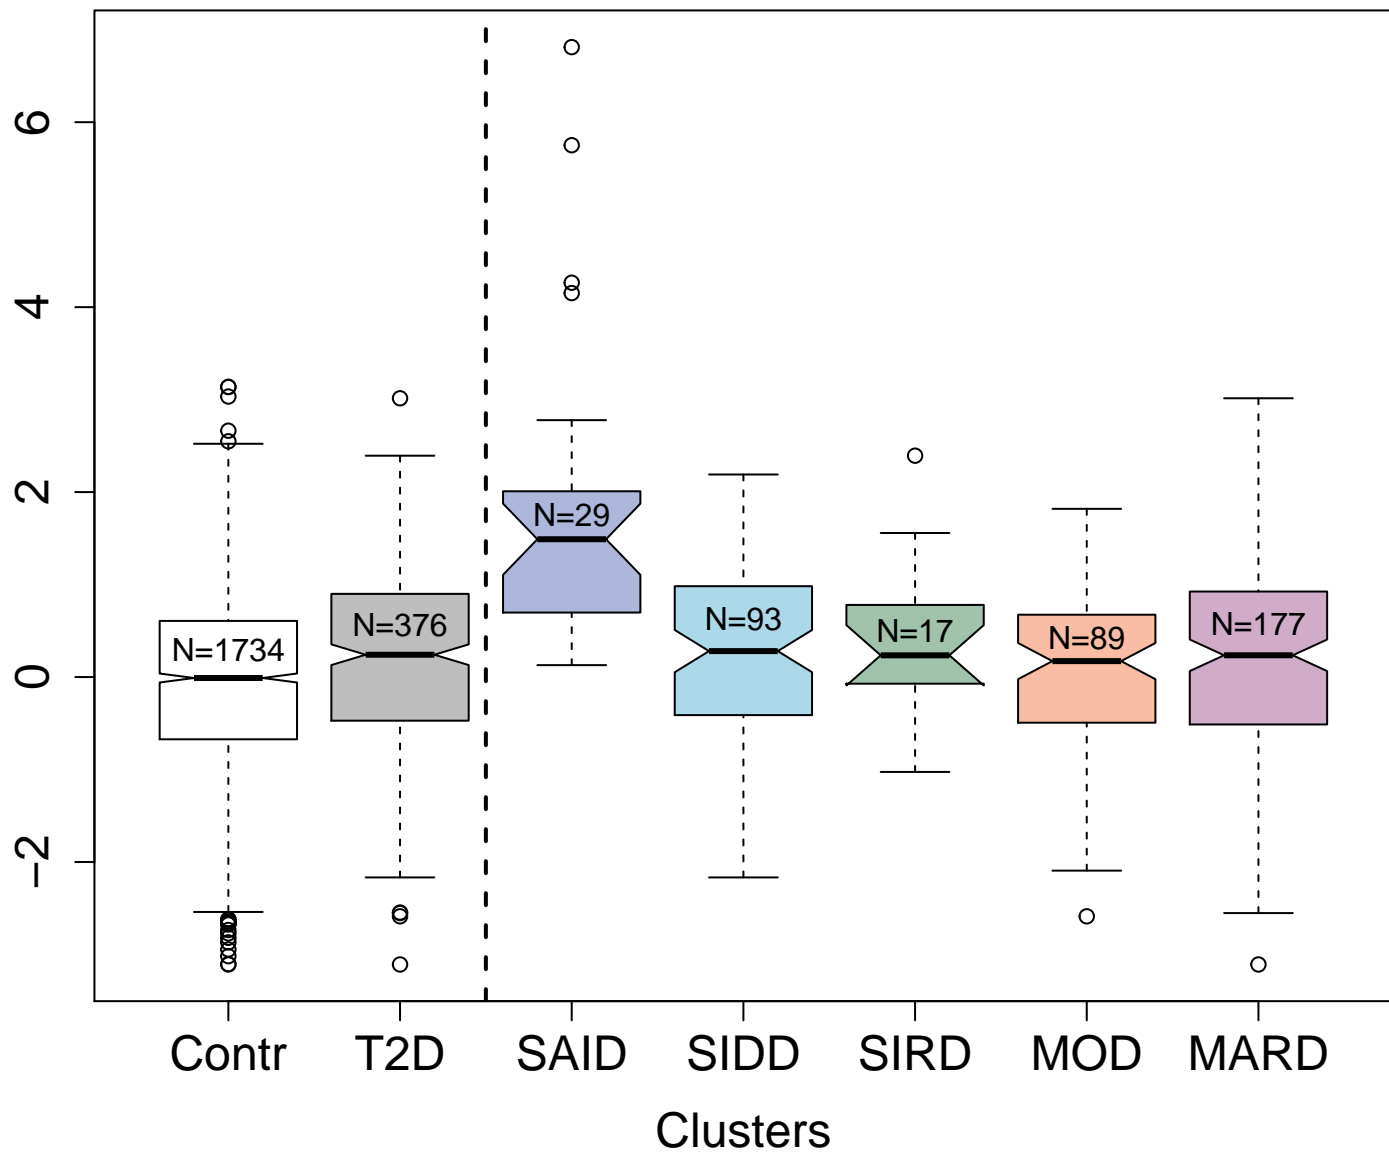

M18254 : paraxanthine

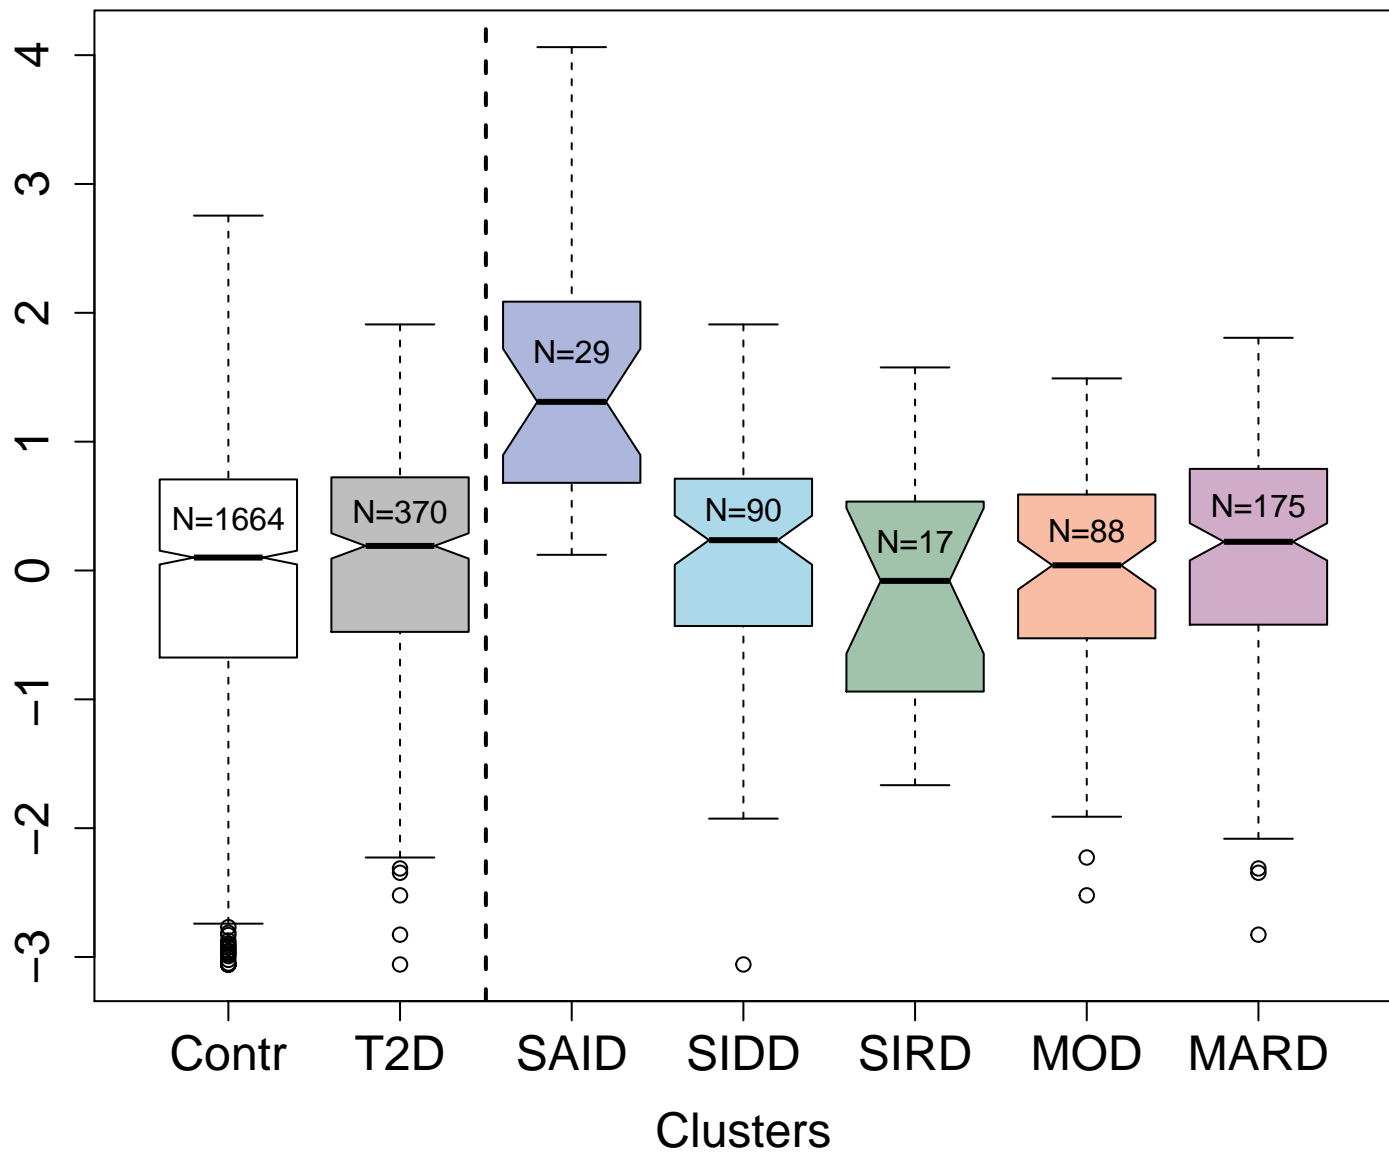

M37184 : 5alpha-androstan-3alpha,17beta-diol disulfate

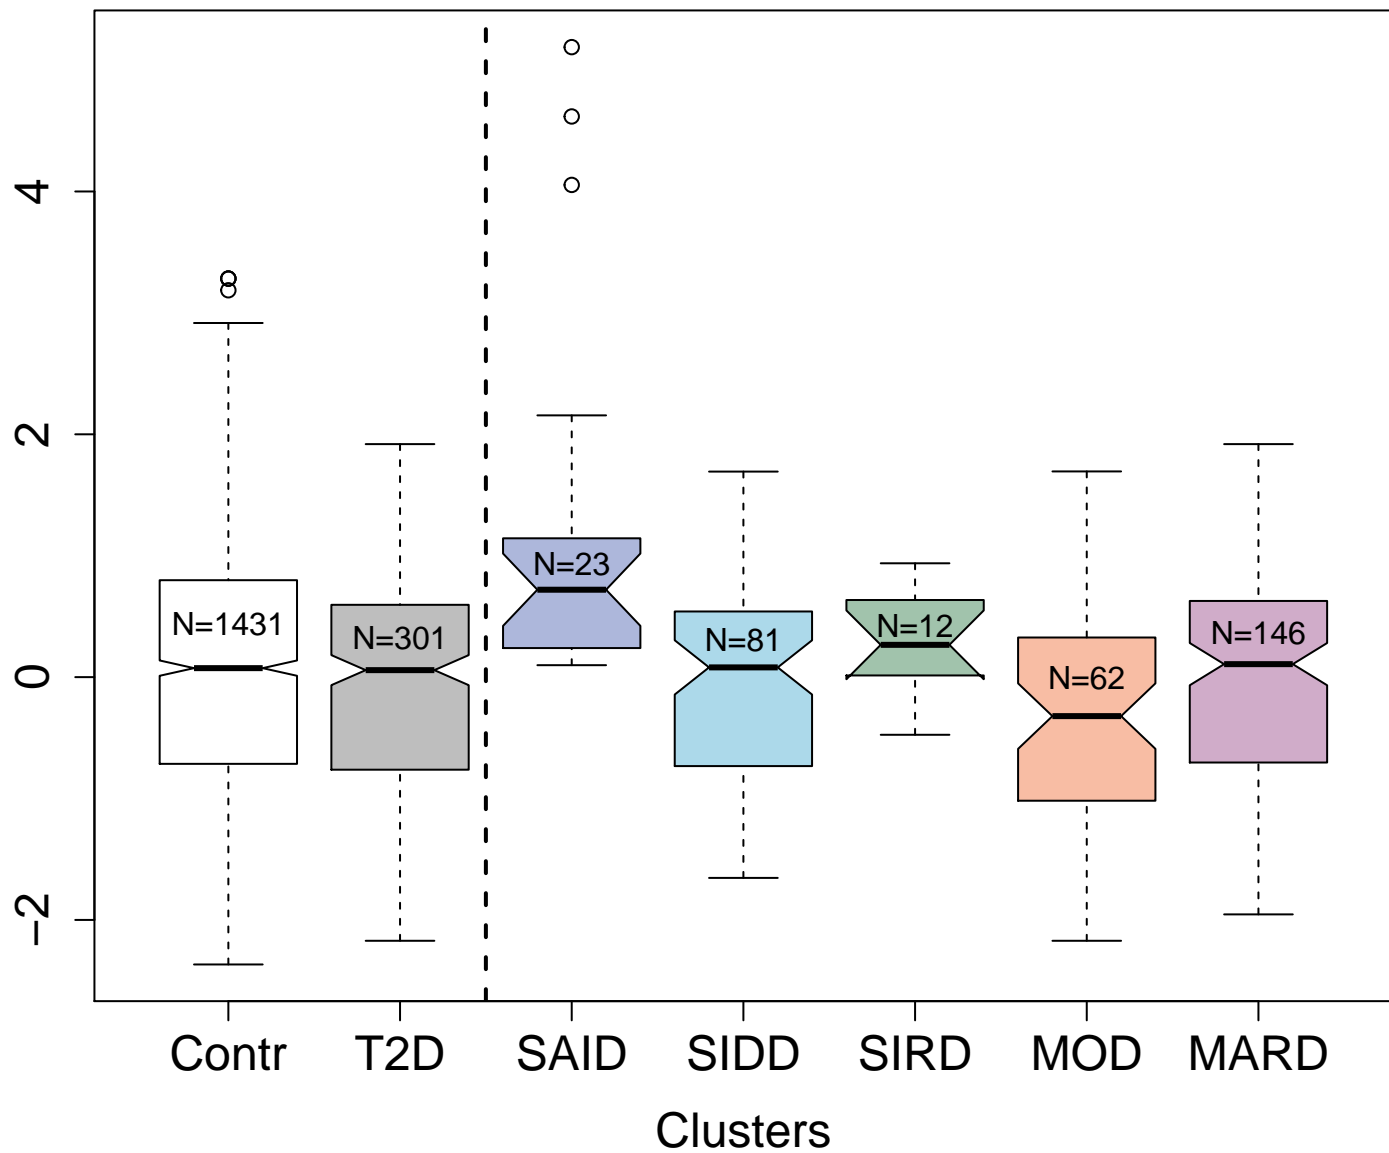

M57473 : sphingomyelin (d18:0/18:0, d19:0/17:0)\*

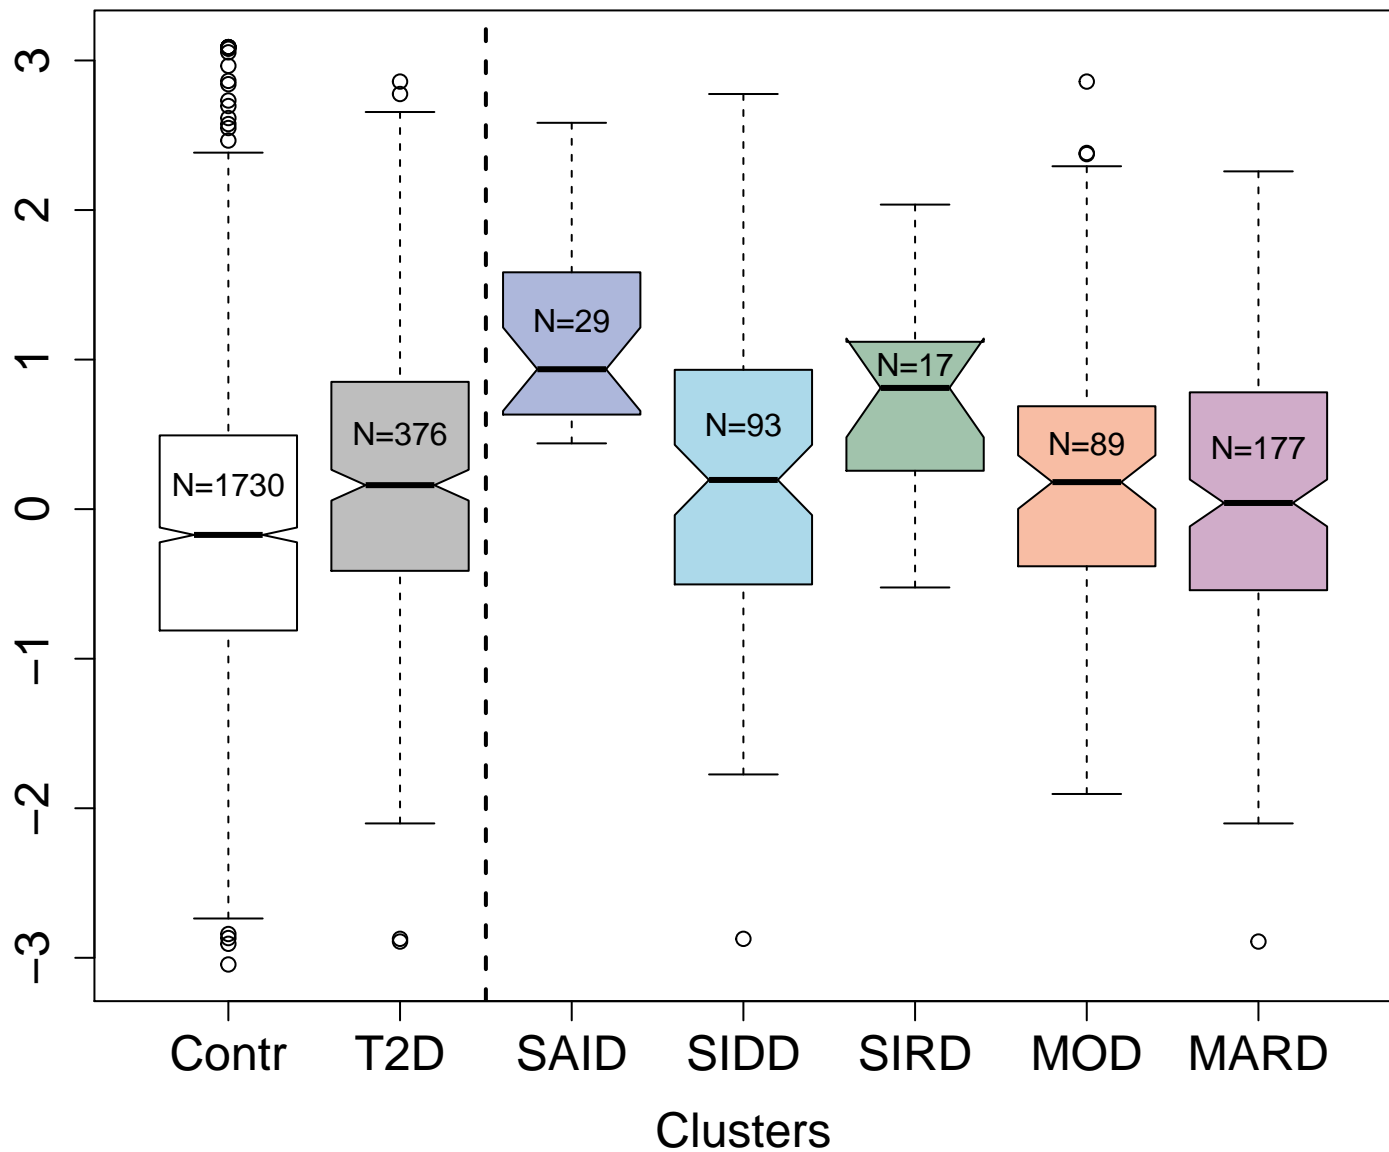

M38661 : hydroxycotinine

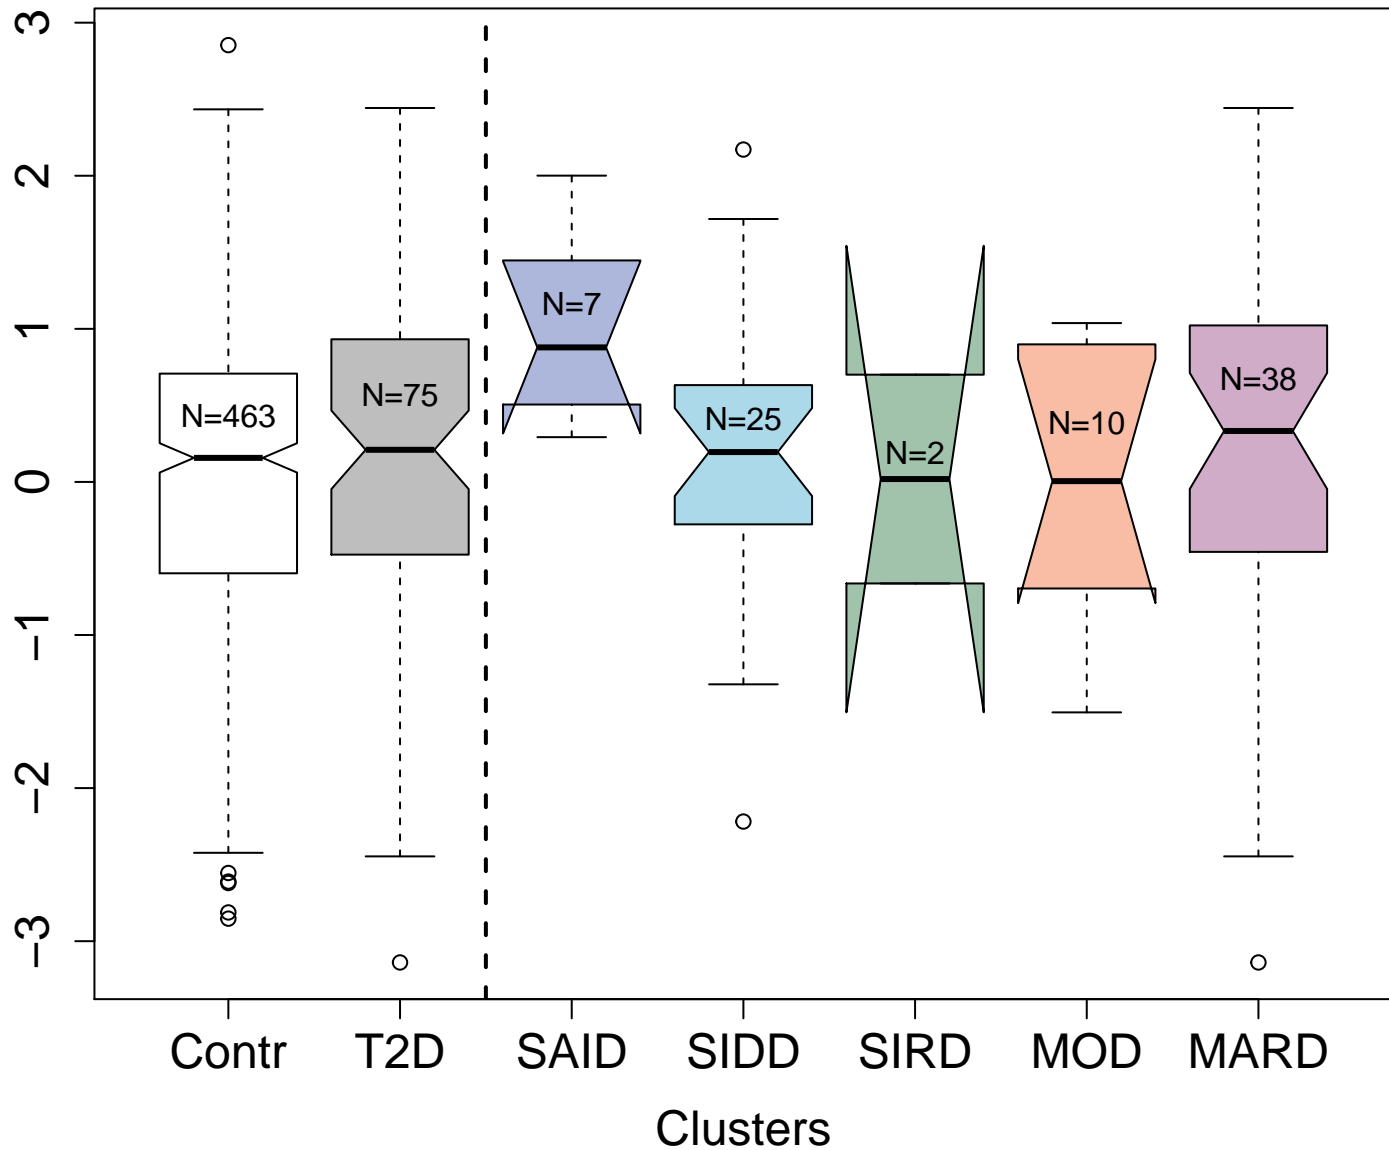

M46510 : X - 12544

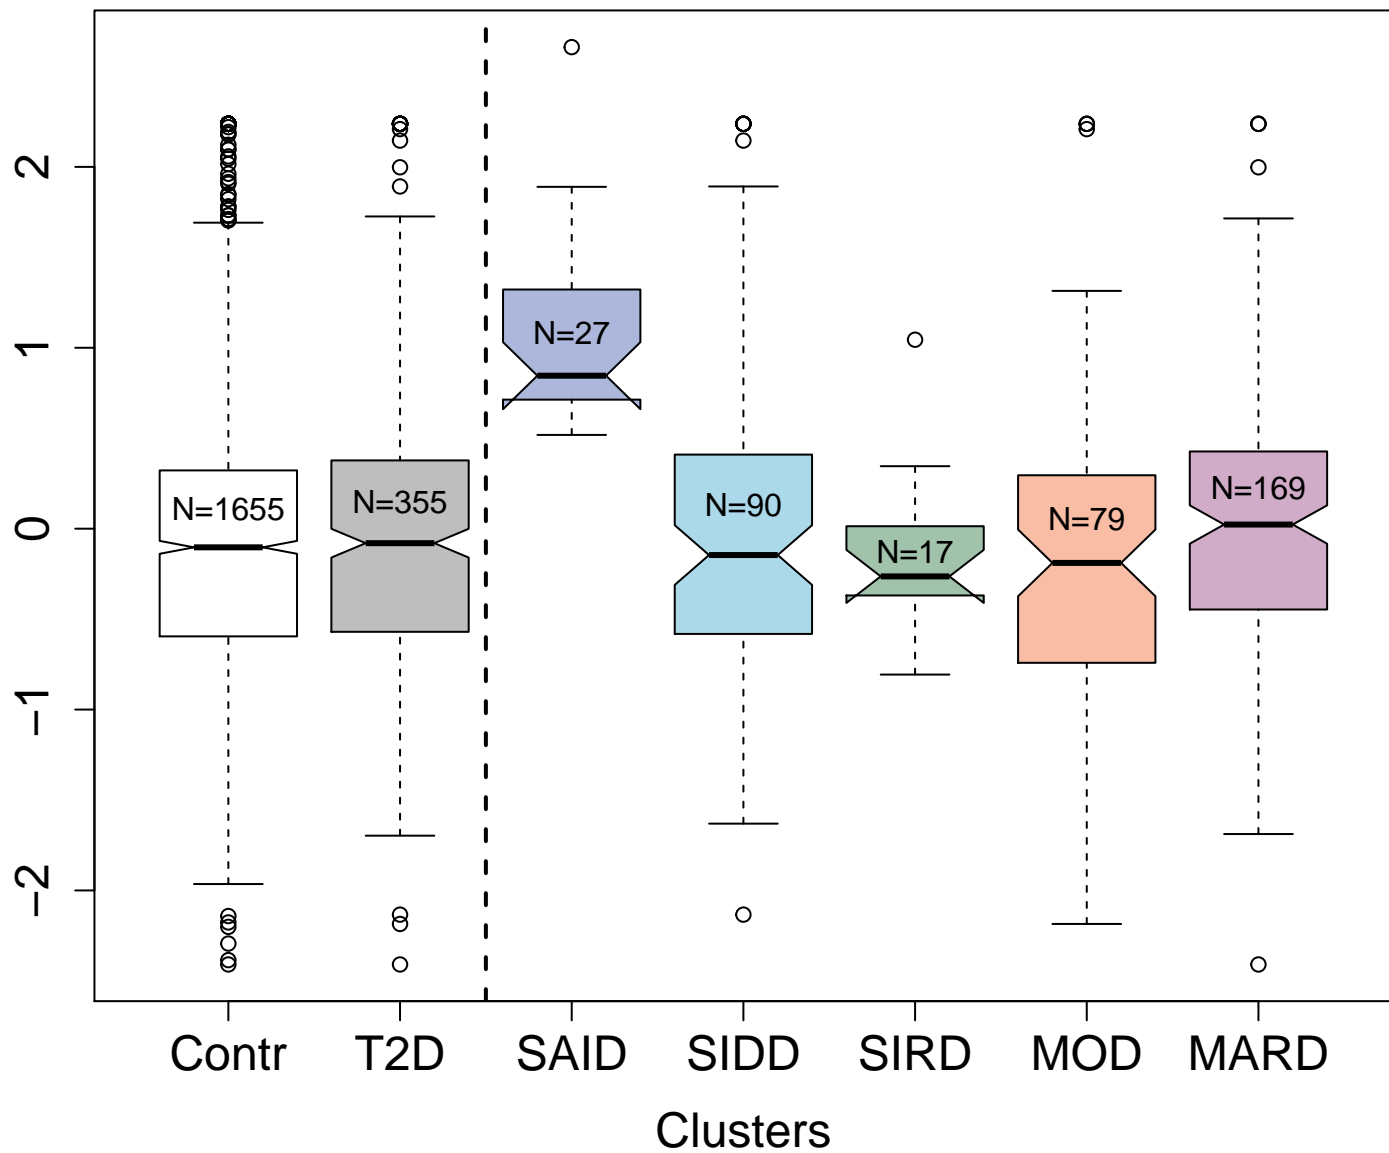

M46994 : X - 17367

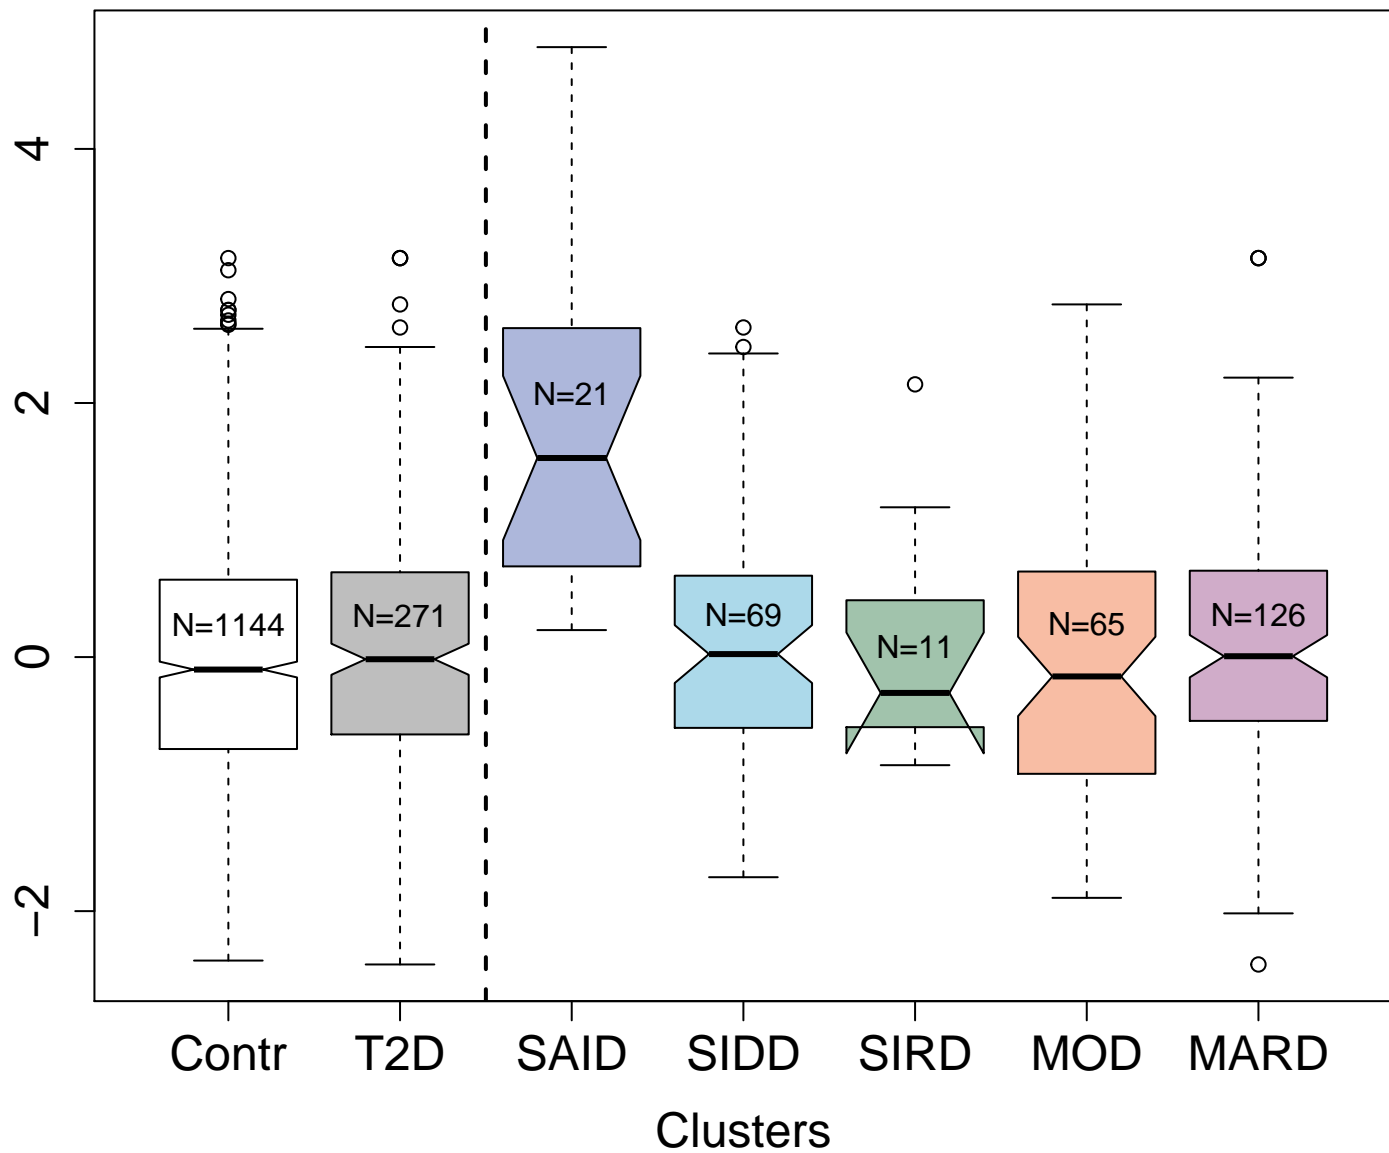

M52605 : sphinganine-1-phosphate

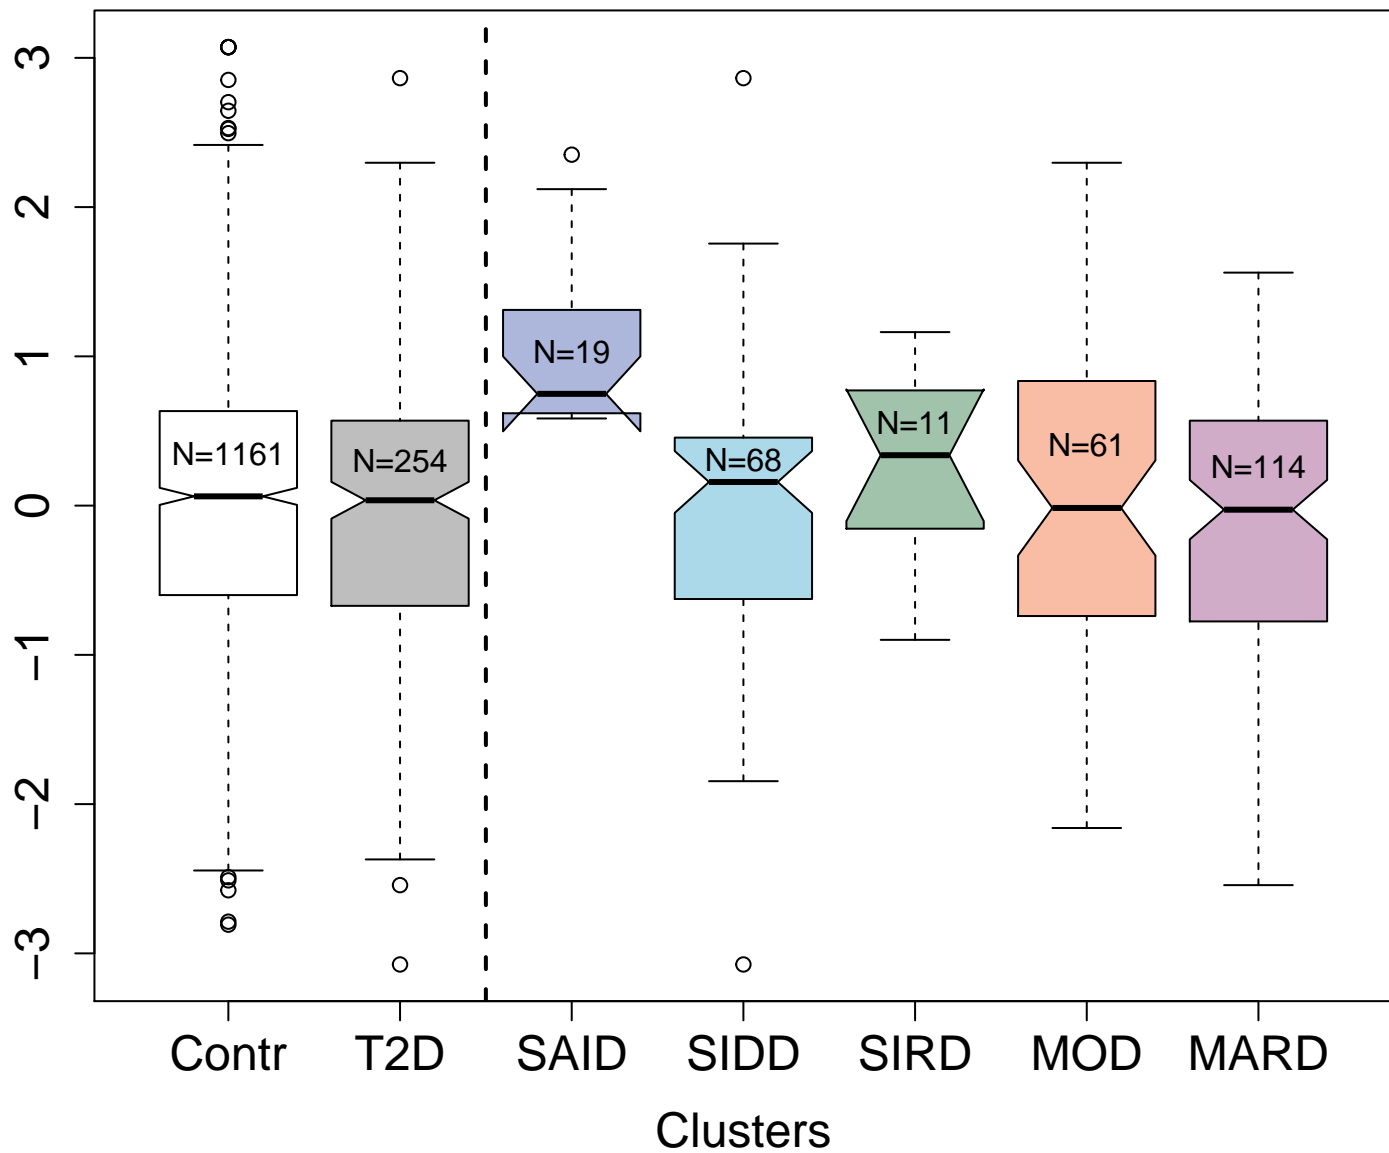



M32198 : acetylcarnitine (C2)

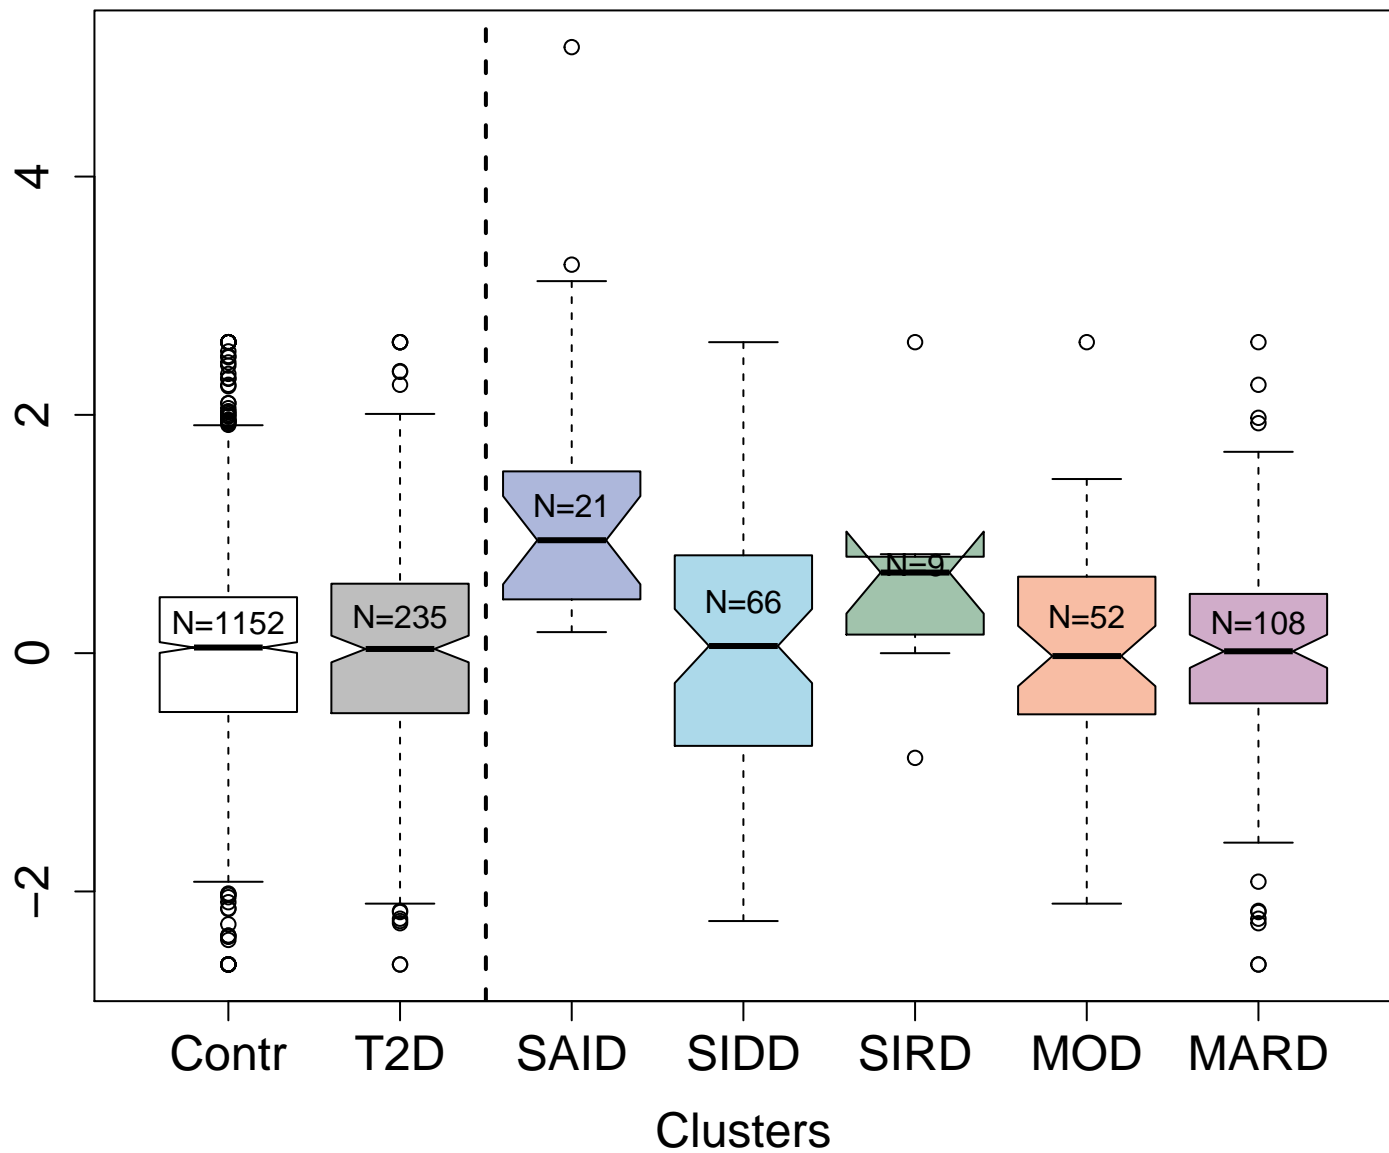

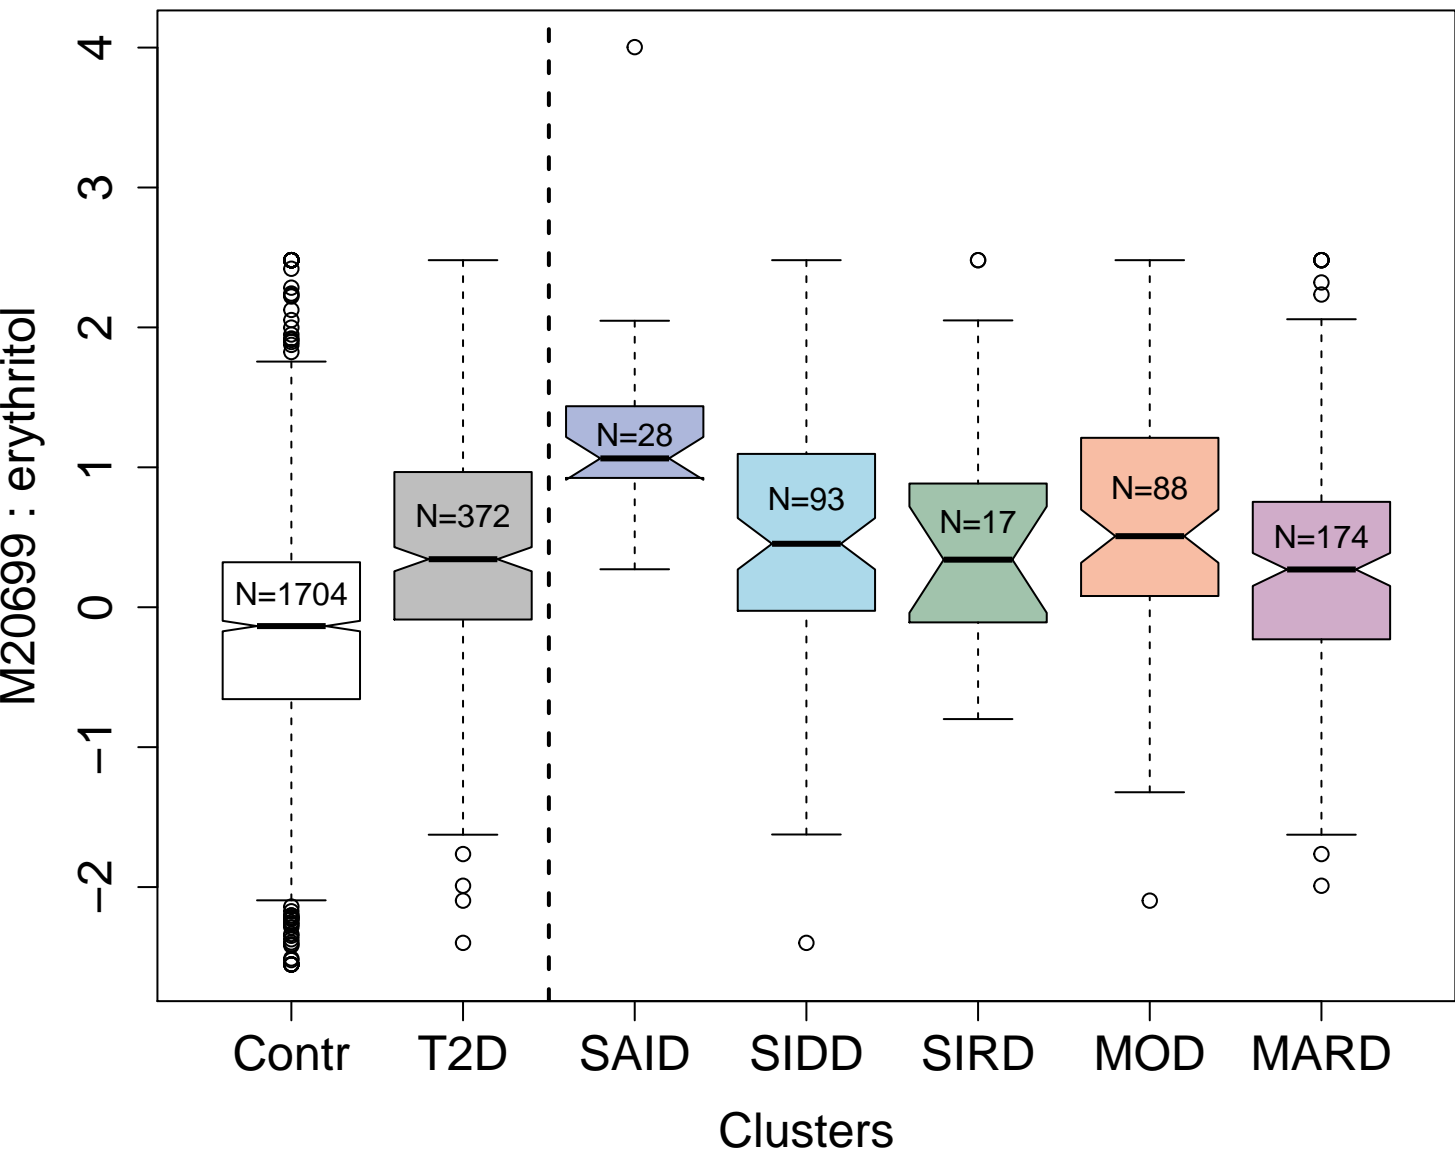

M34214 : 1-arachidonoyl-GPI (20:4)\*

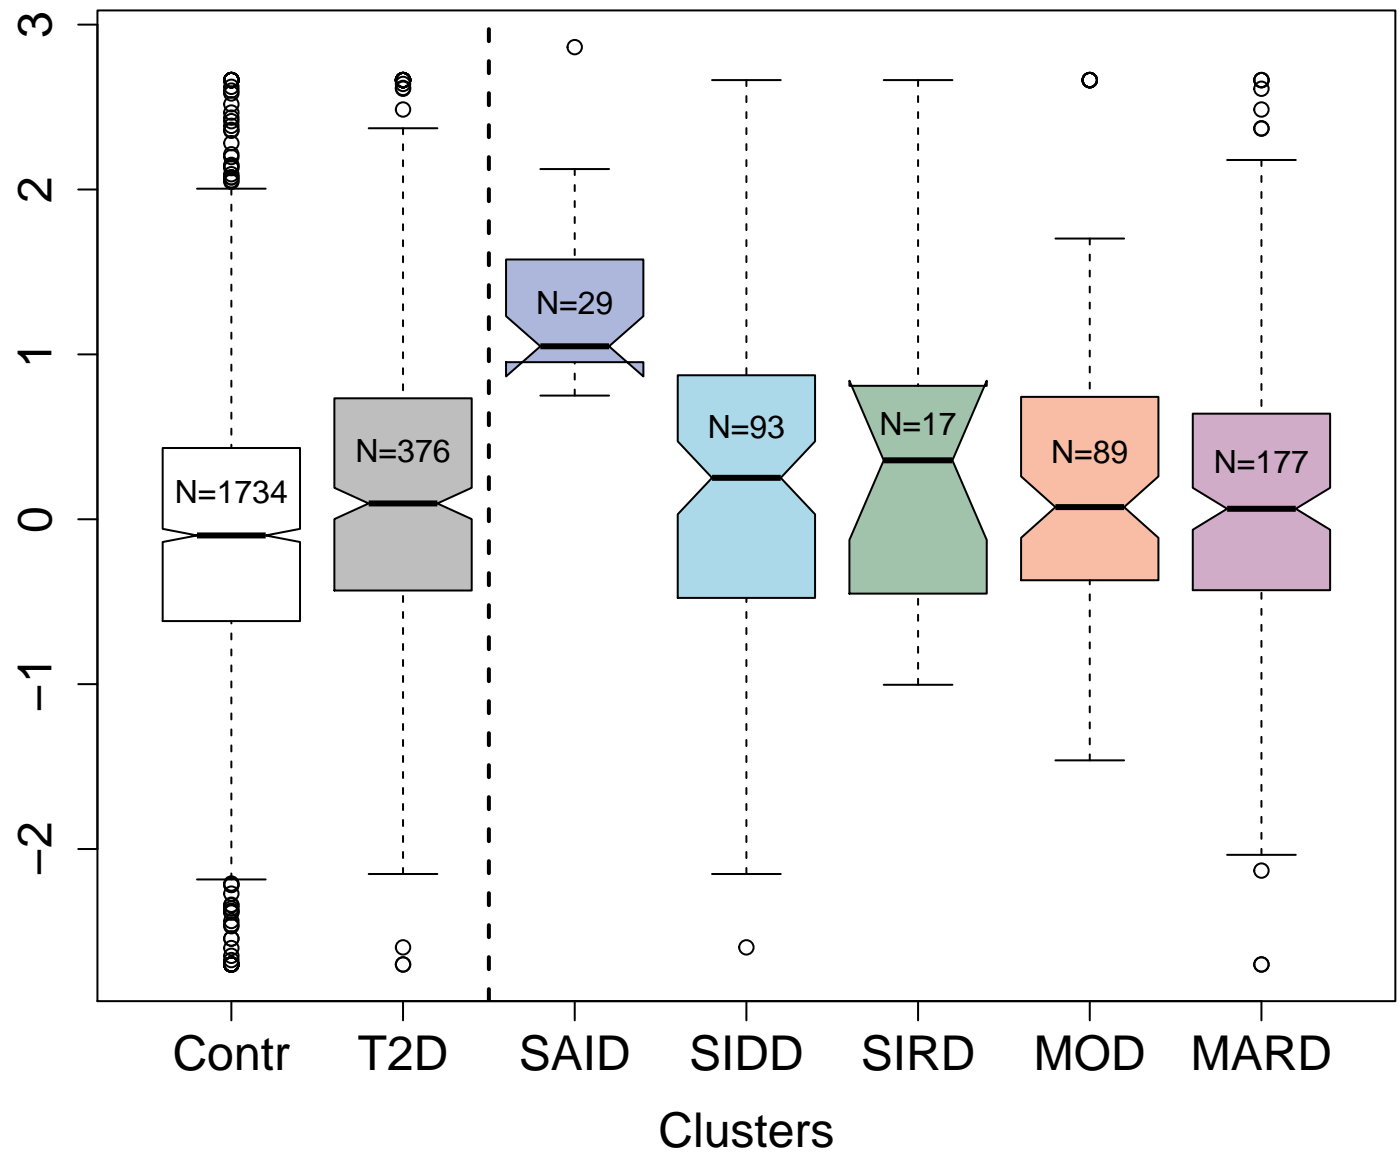

M46511: X - 16938

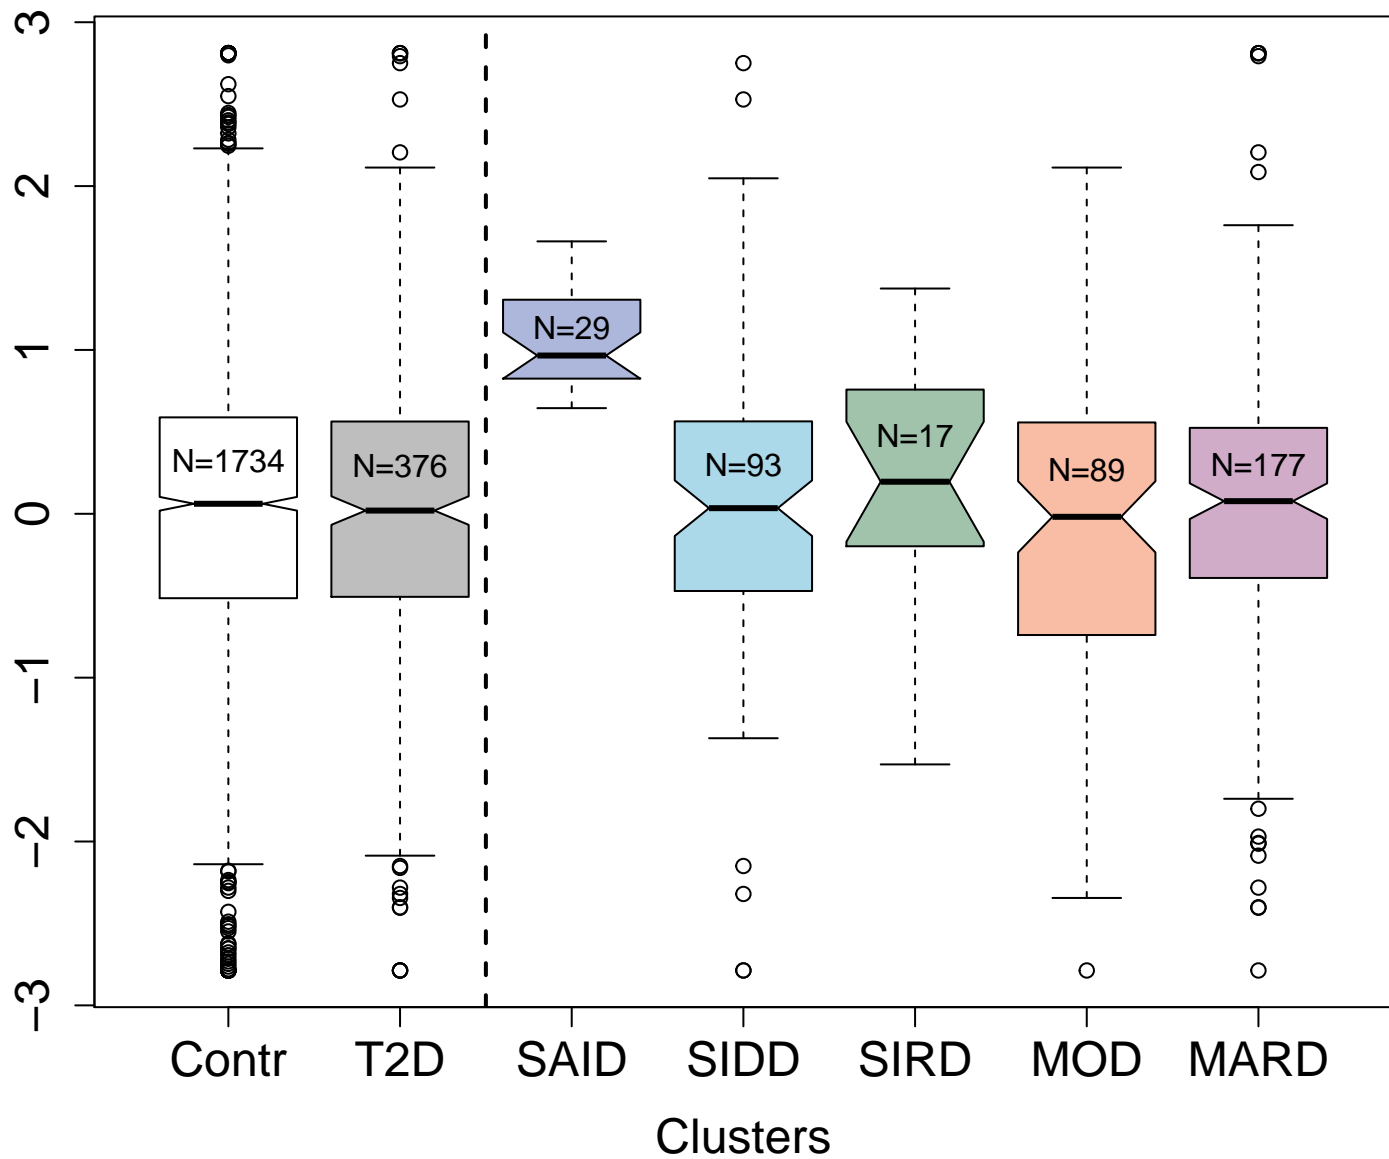

M1101 : homovanillate (HVA)

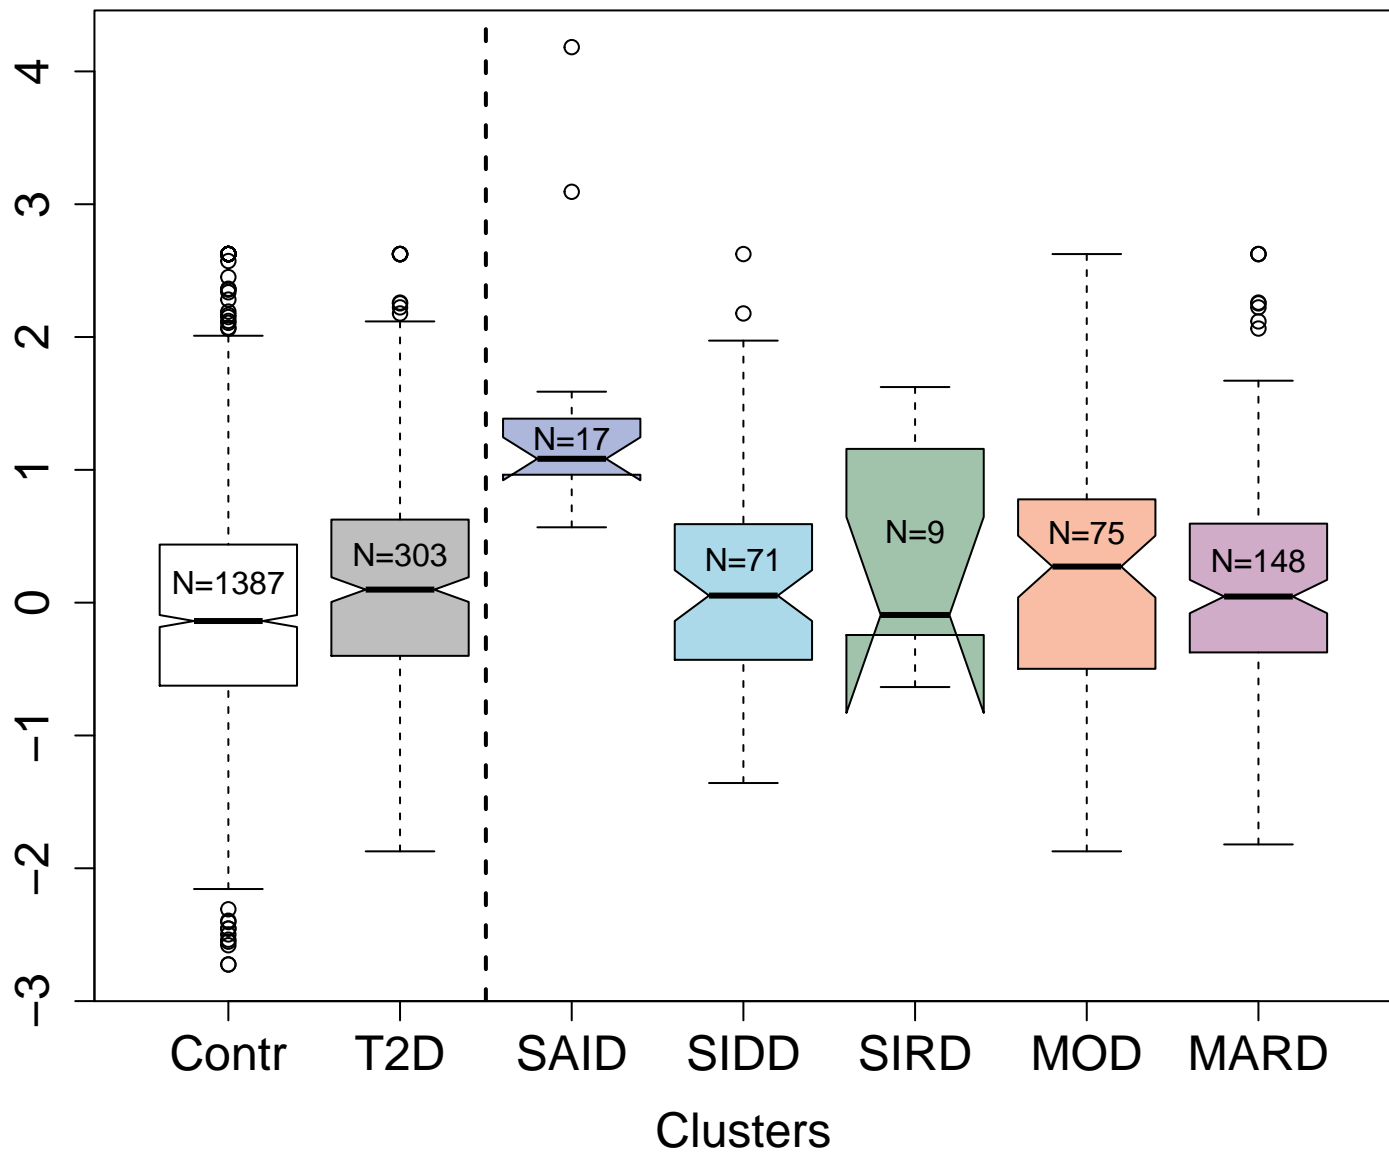

M62524 : dihydrocaffeate sulfate (2)

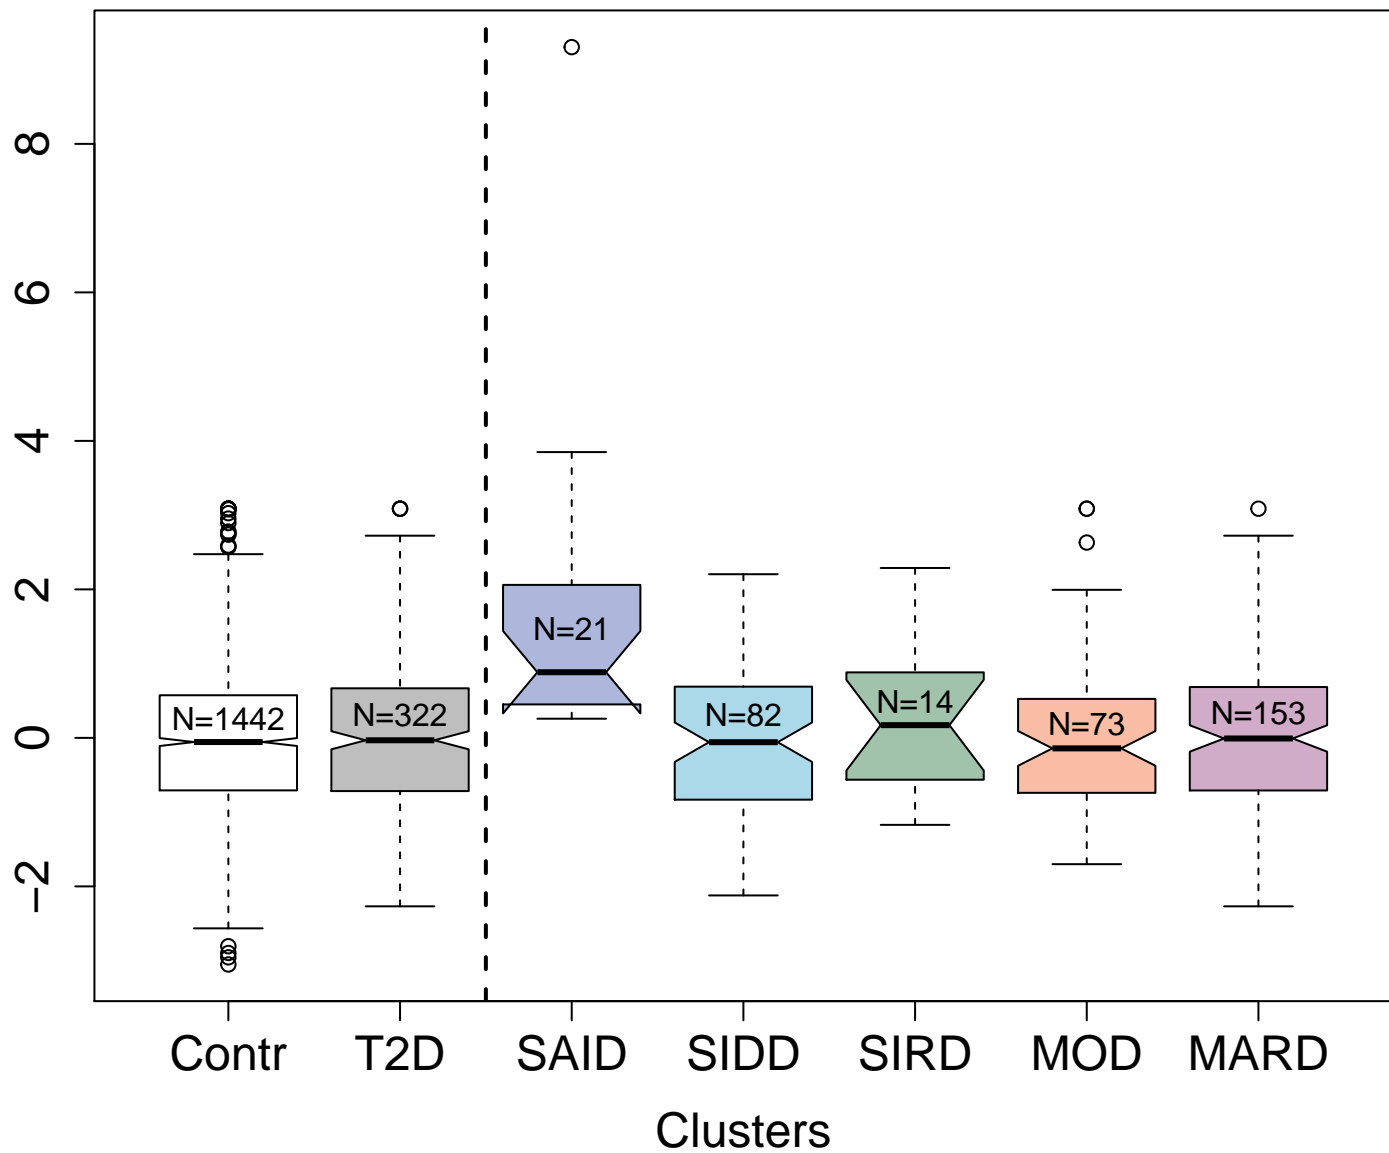

M57746 : anthranilate

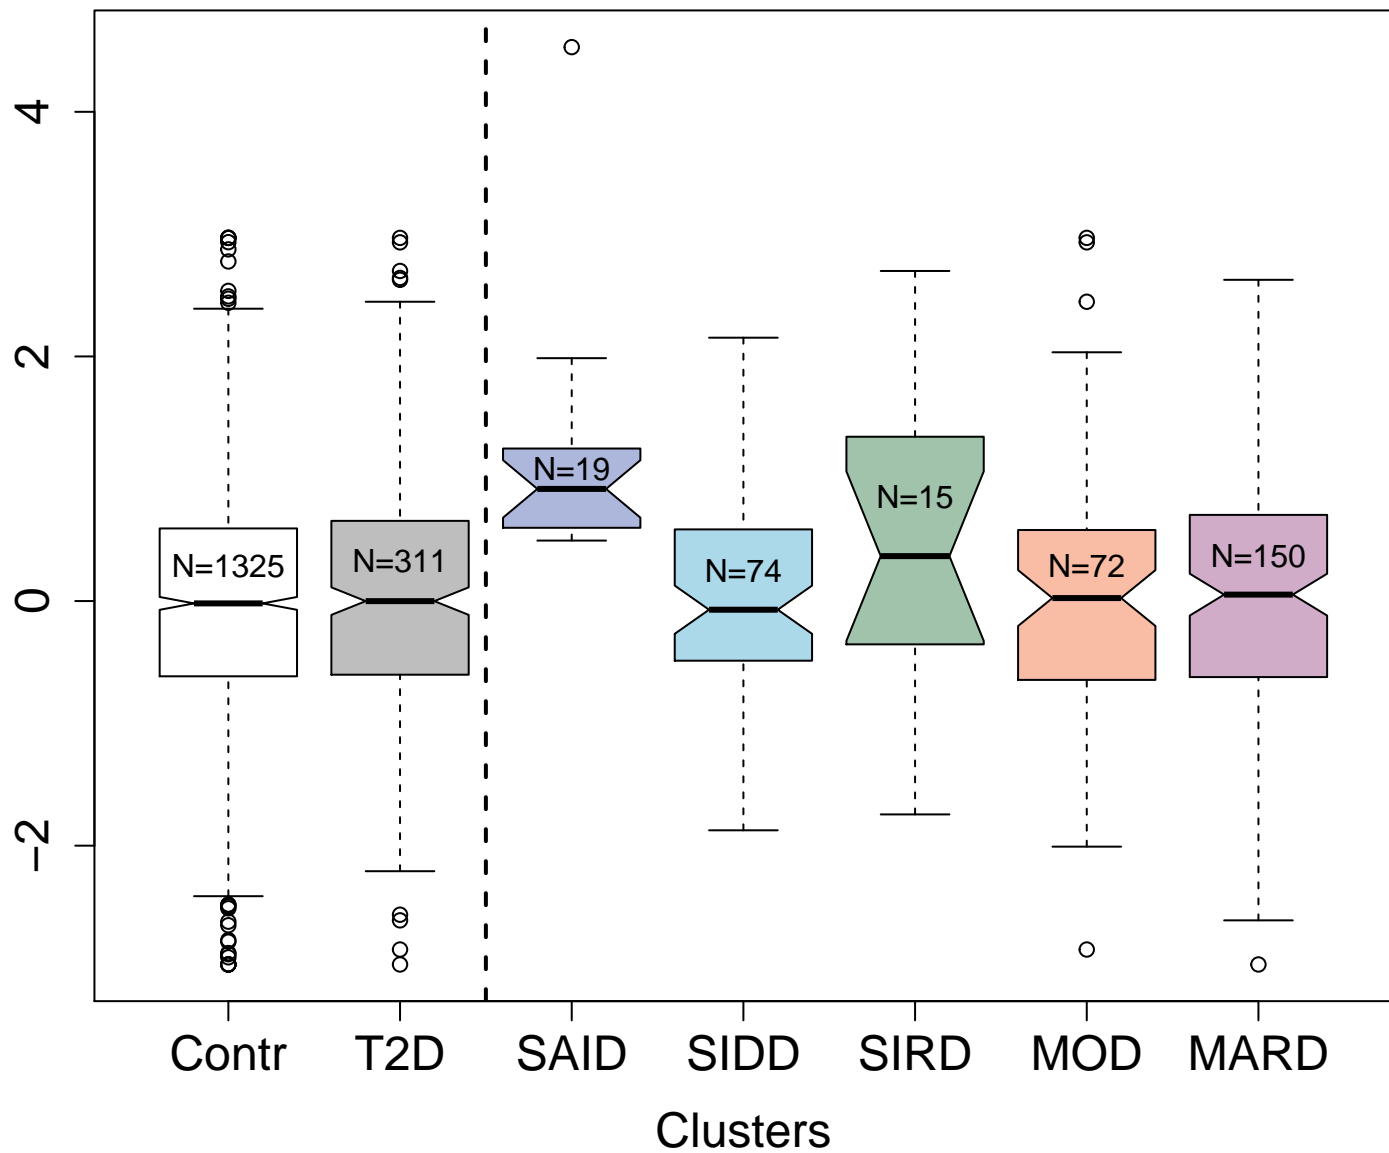

M52433 : sphingomyelin (d17:1/16:0, d18:1/15:0, d16:1/17:0)

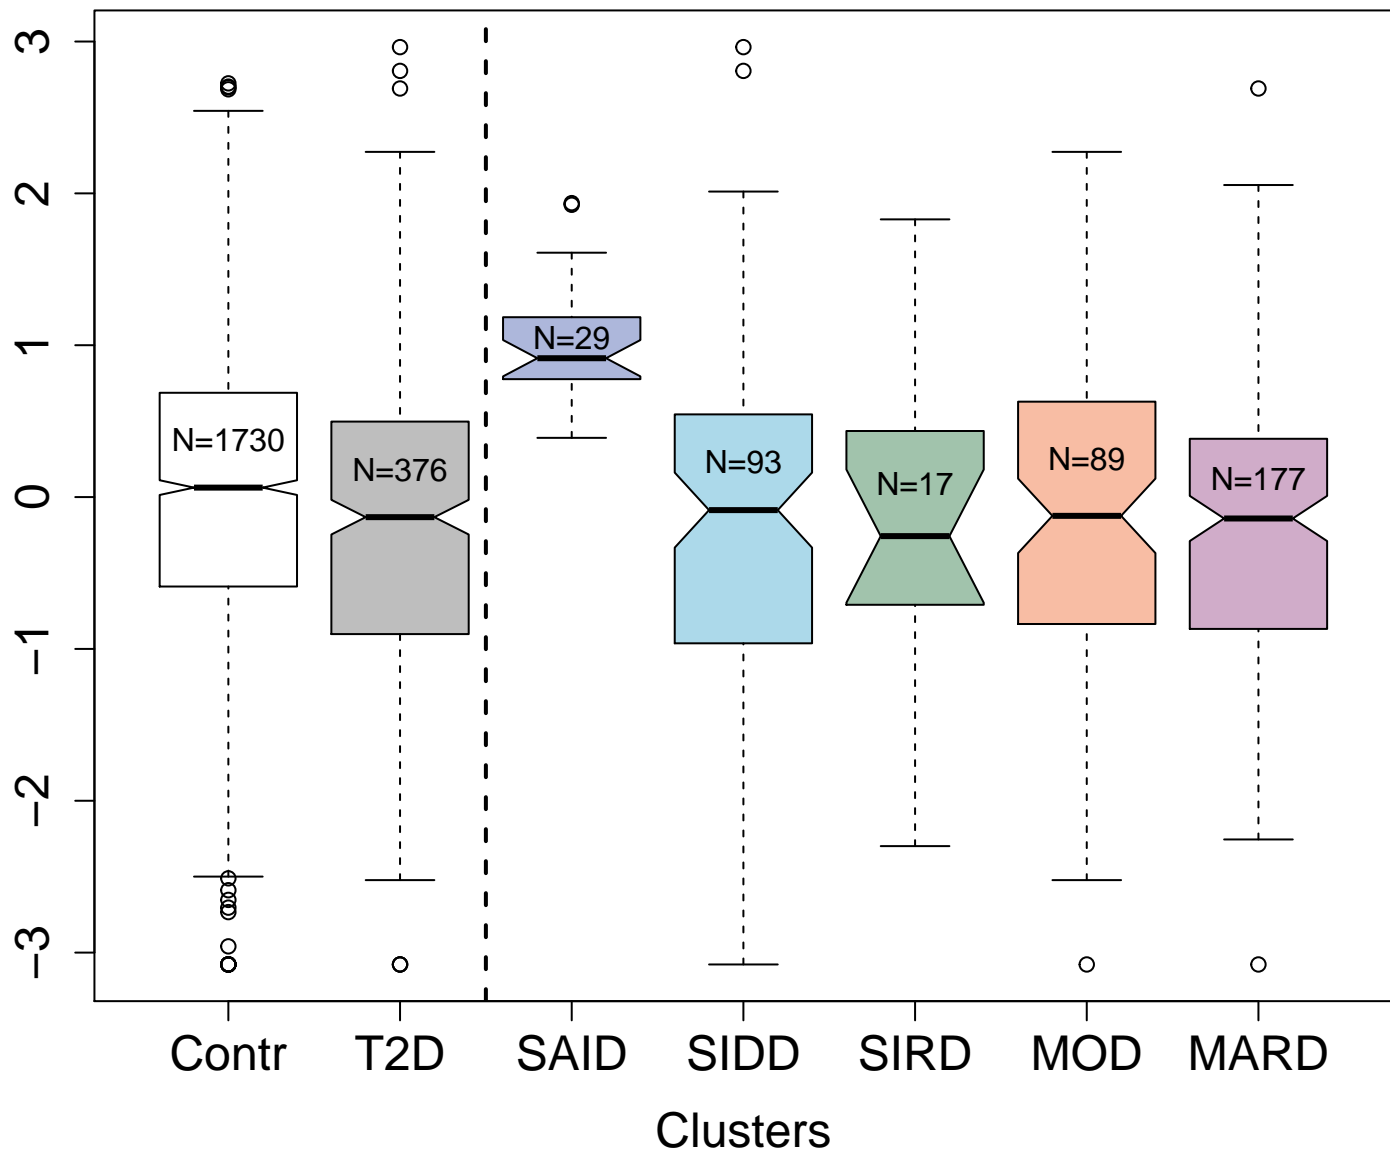



M37209 : androstenediol (3alpha, 17alpha) monosulfate (3)

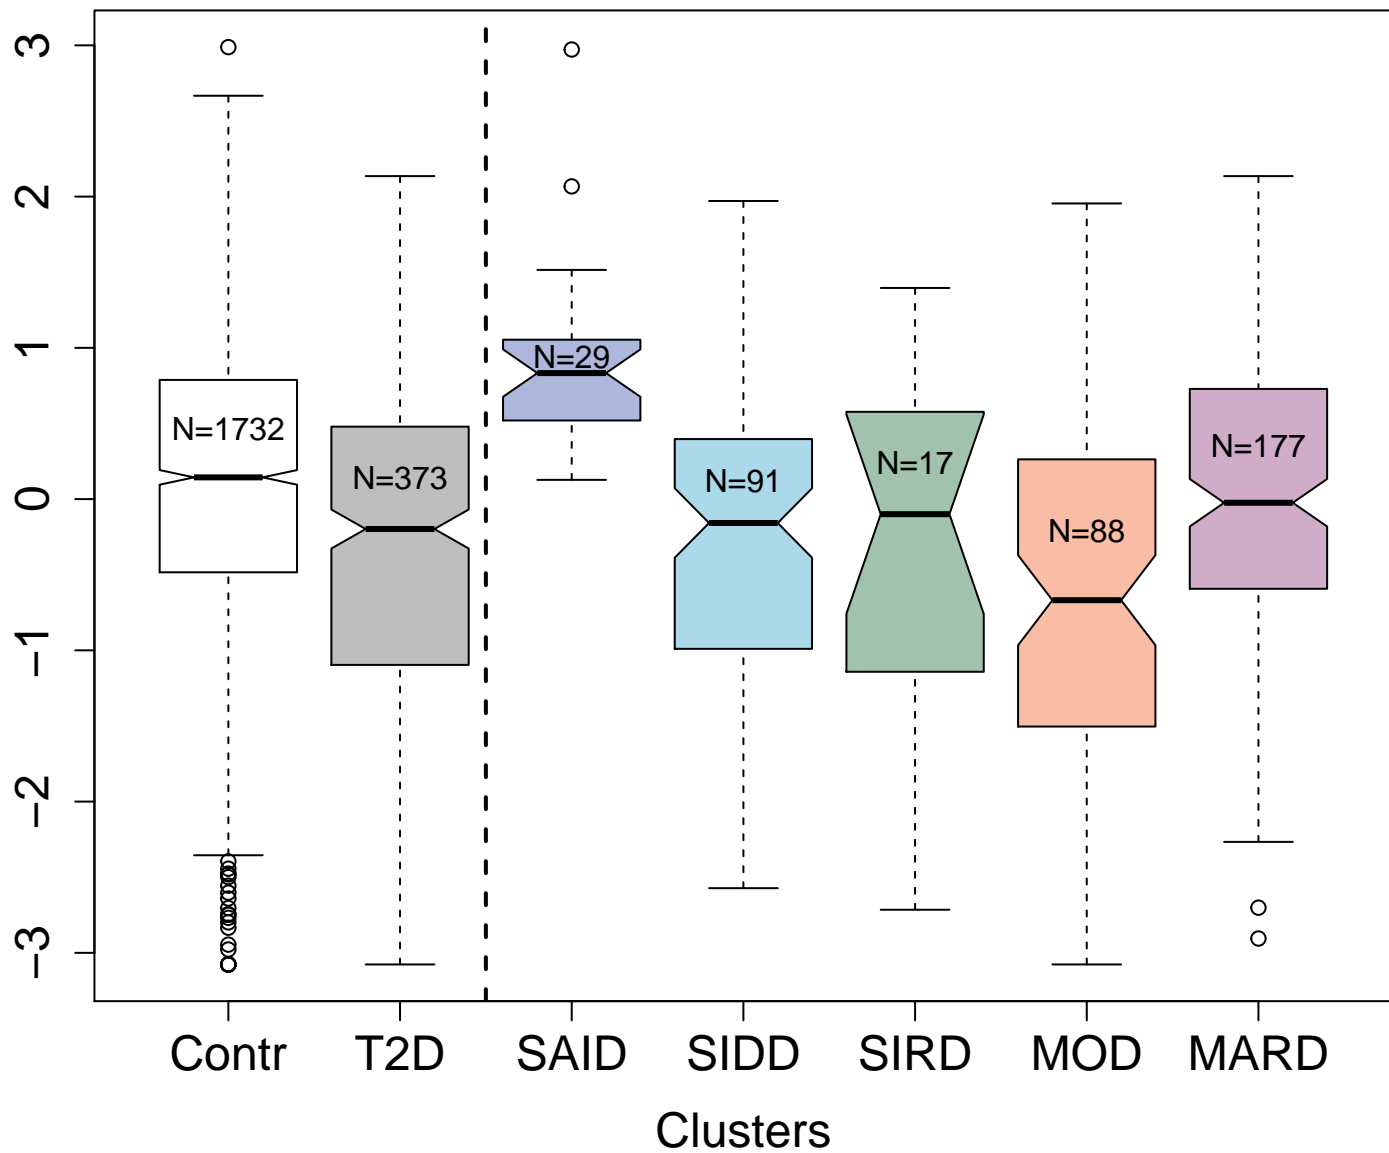

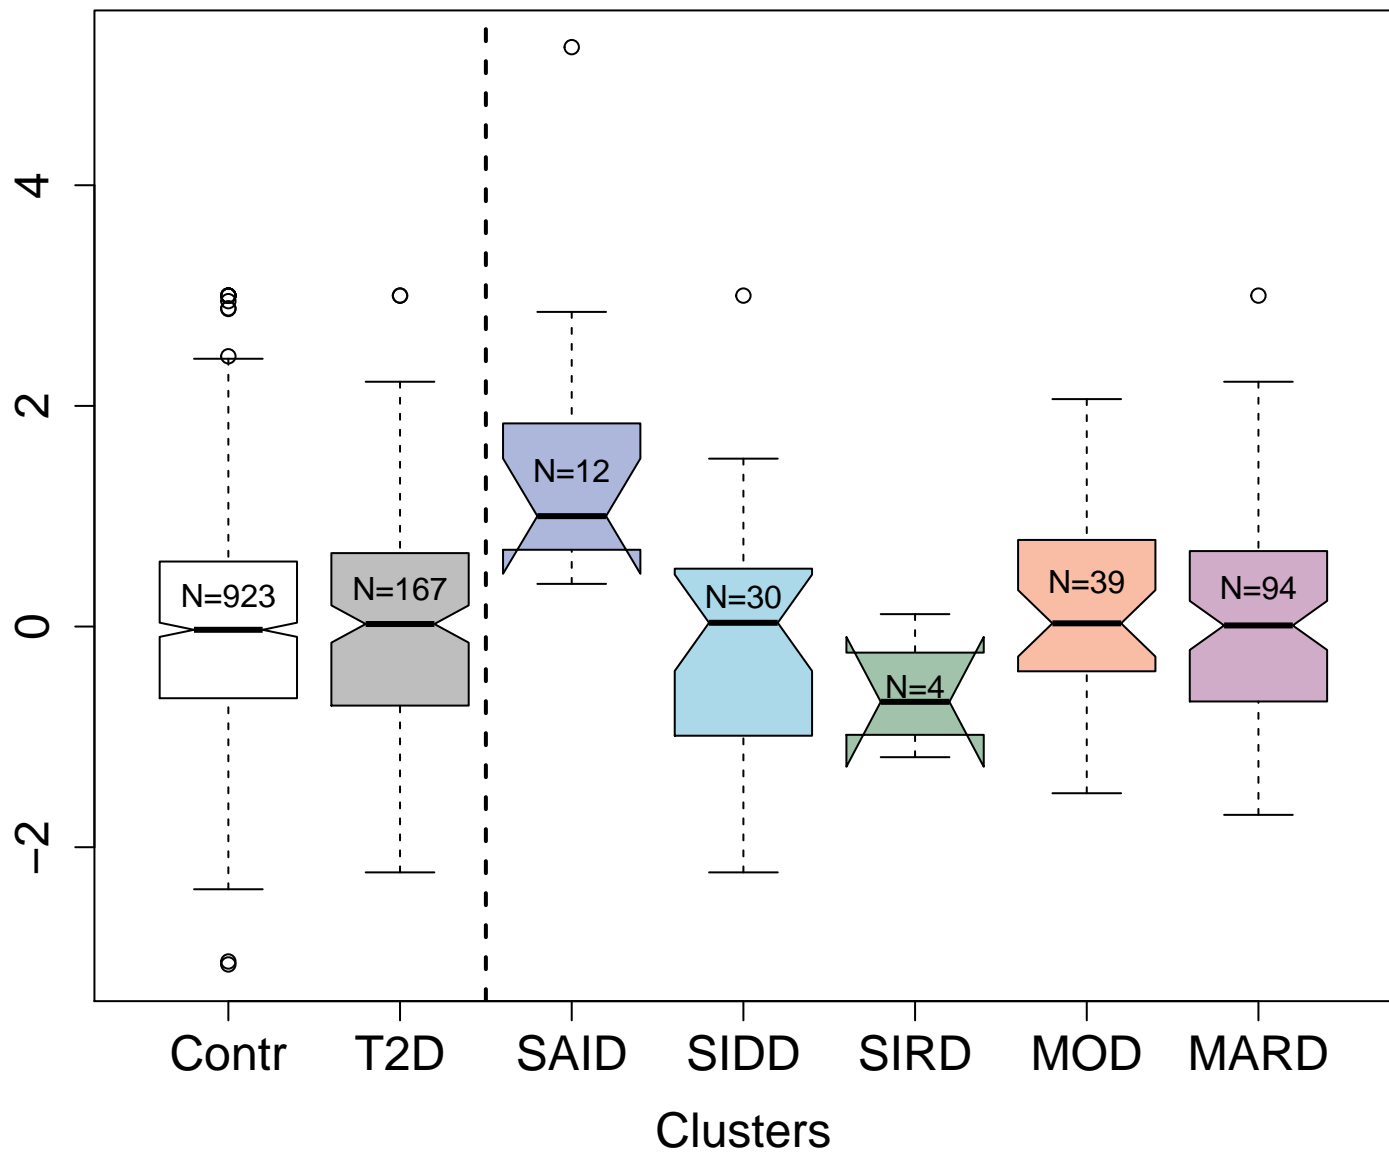

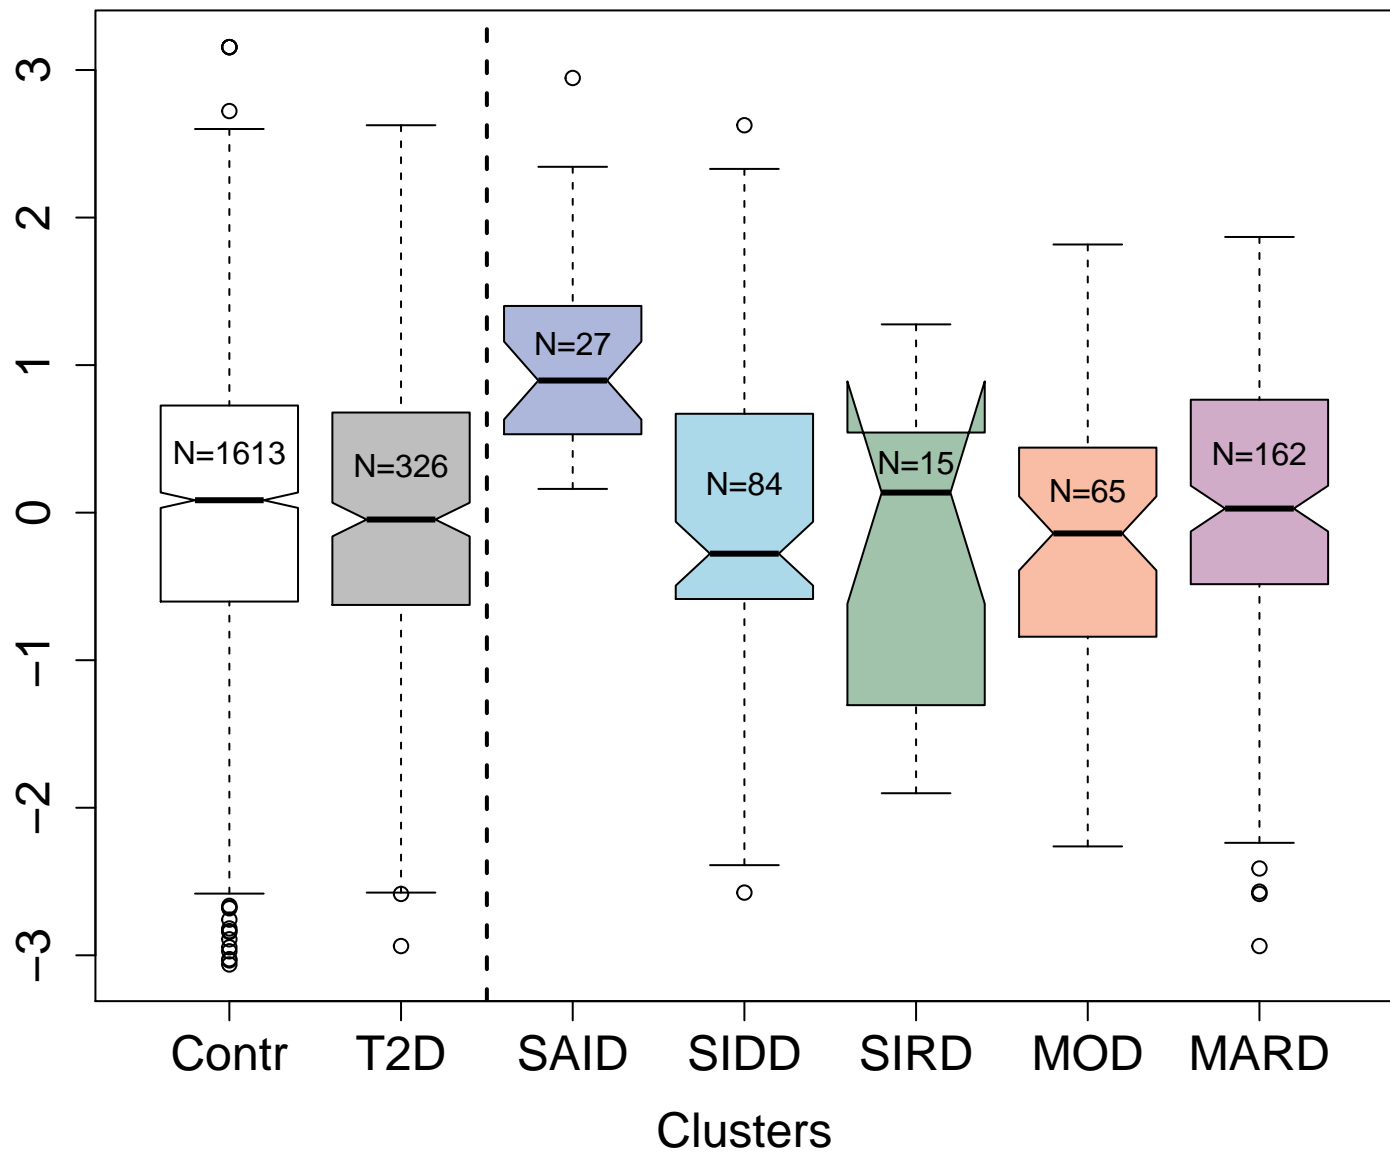

M55017 : 4-hydroxyphenylacetylglutamine

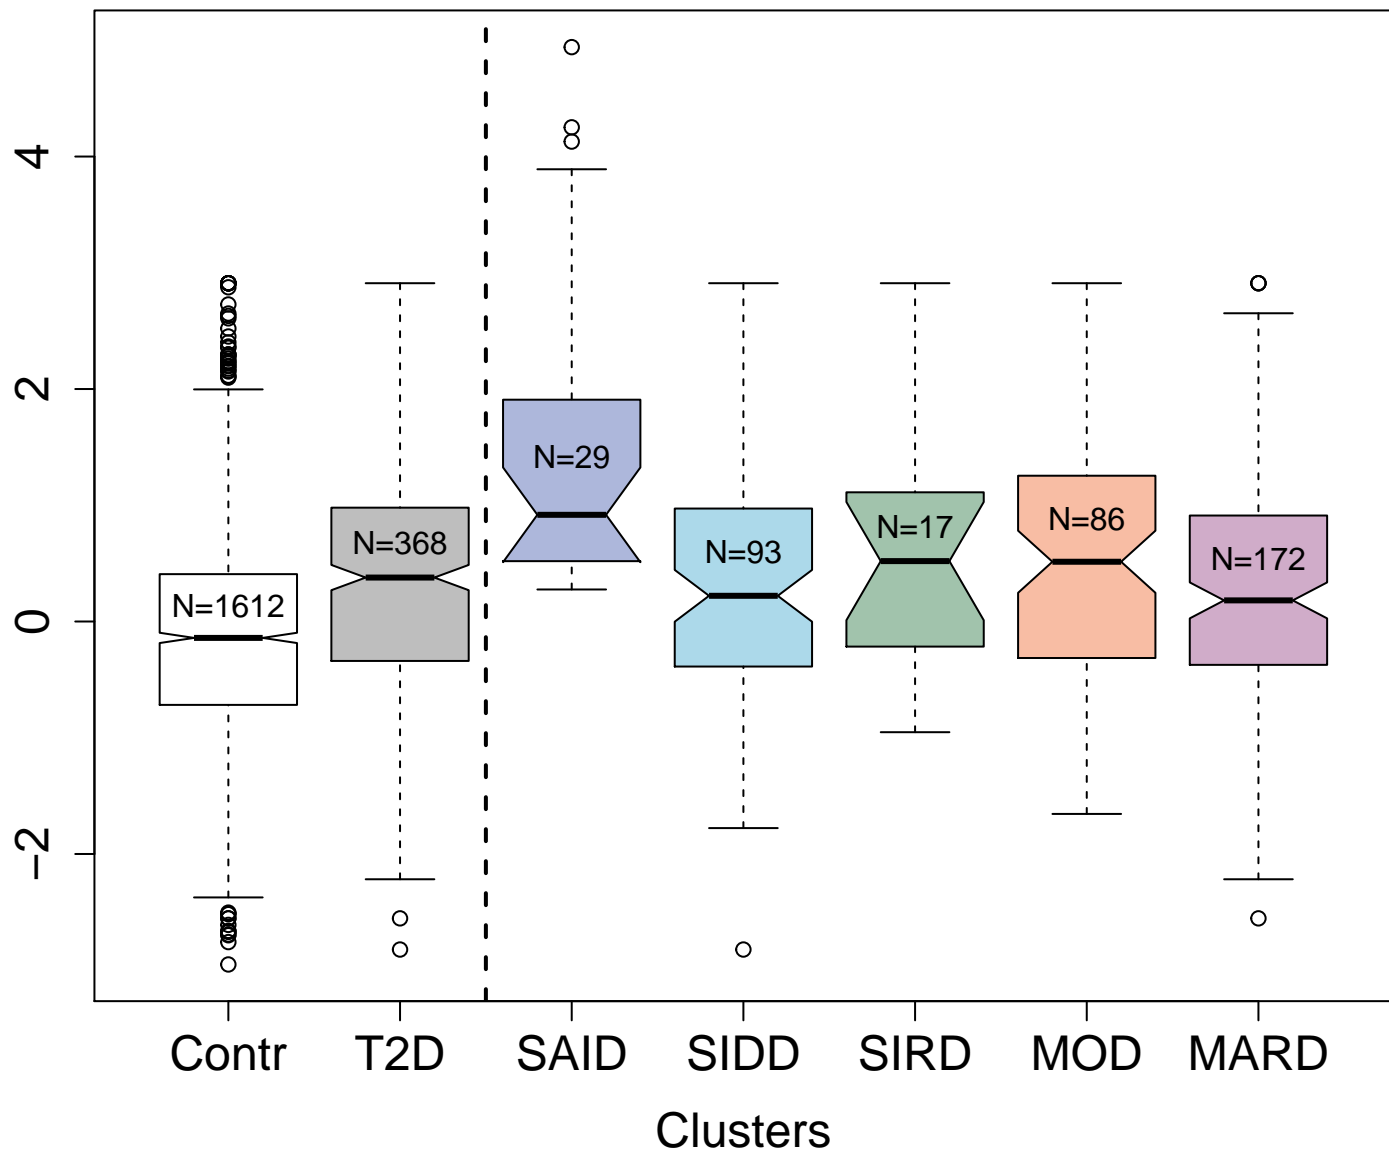

M54695 : X - 24757

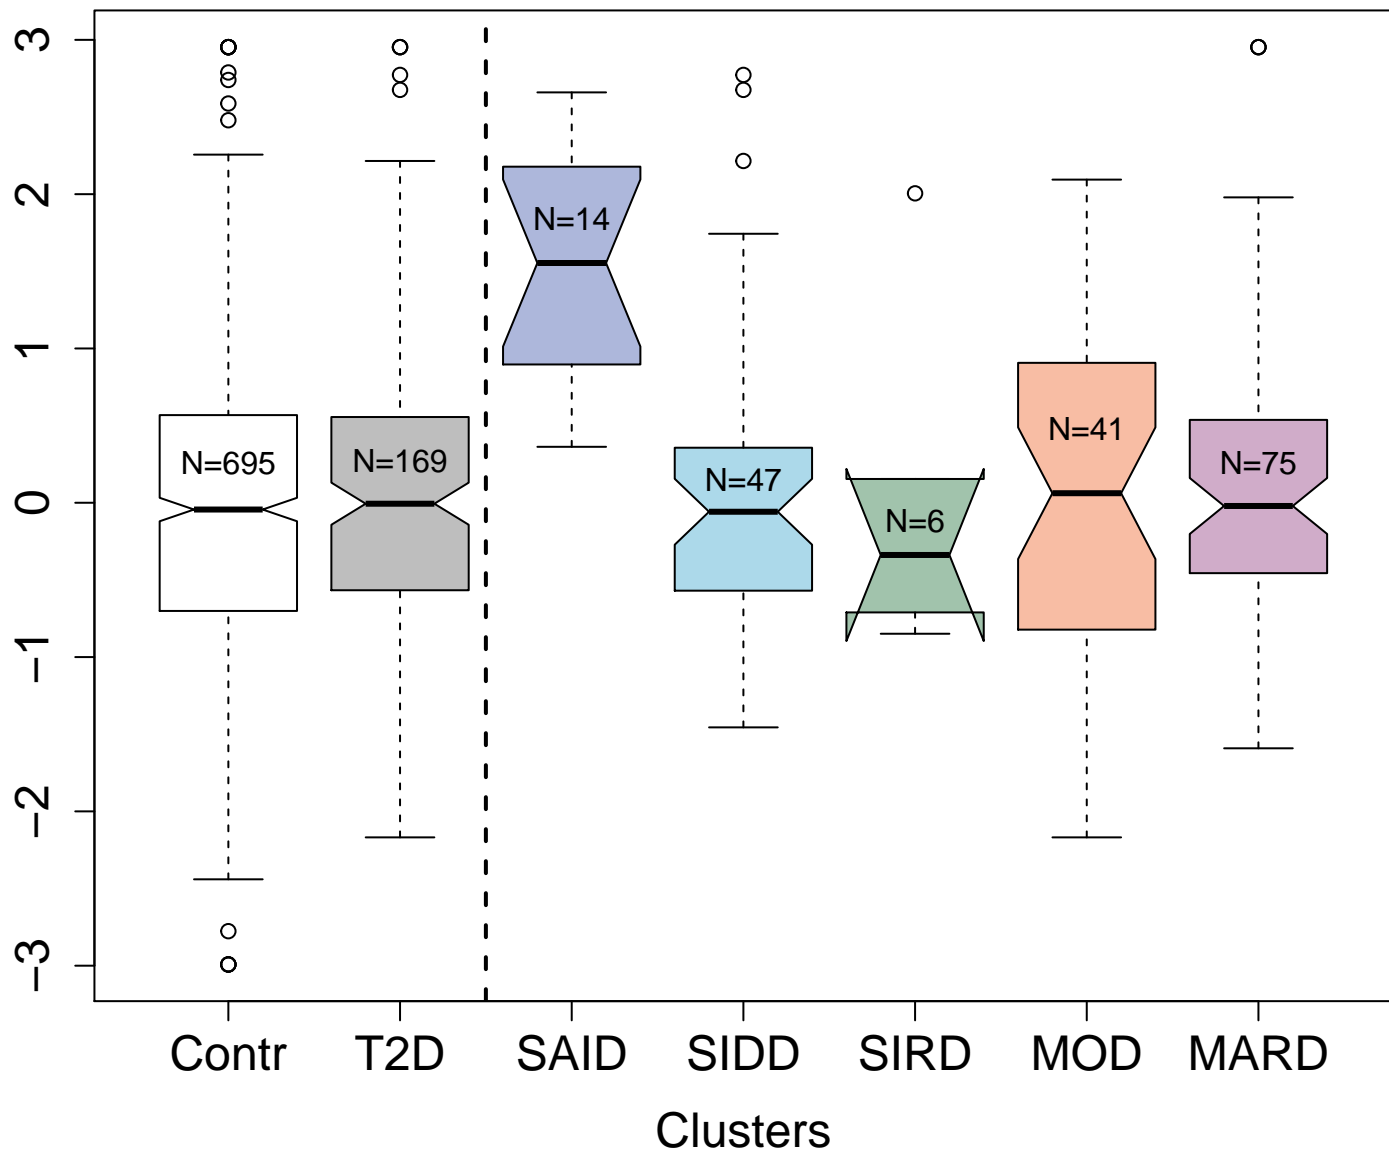

M61876 : glucuronide of C14H26O4 (1)\*

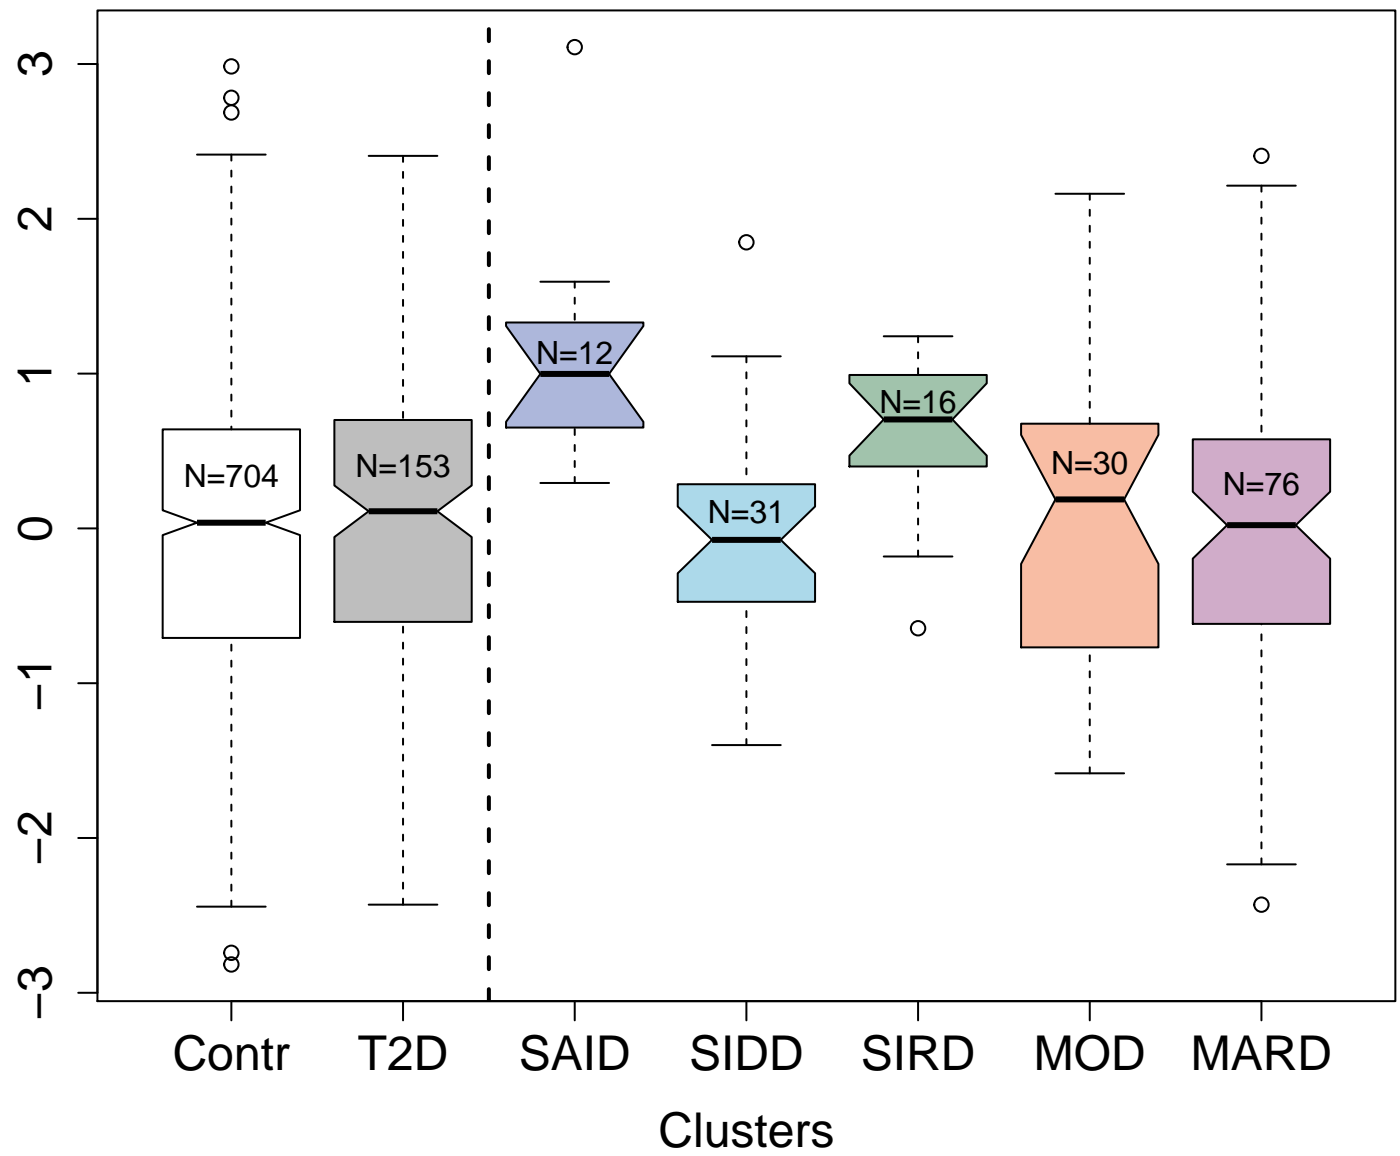

M62152 : sphingomyelin (d17:1/14:0, d16:1/15:0)\*

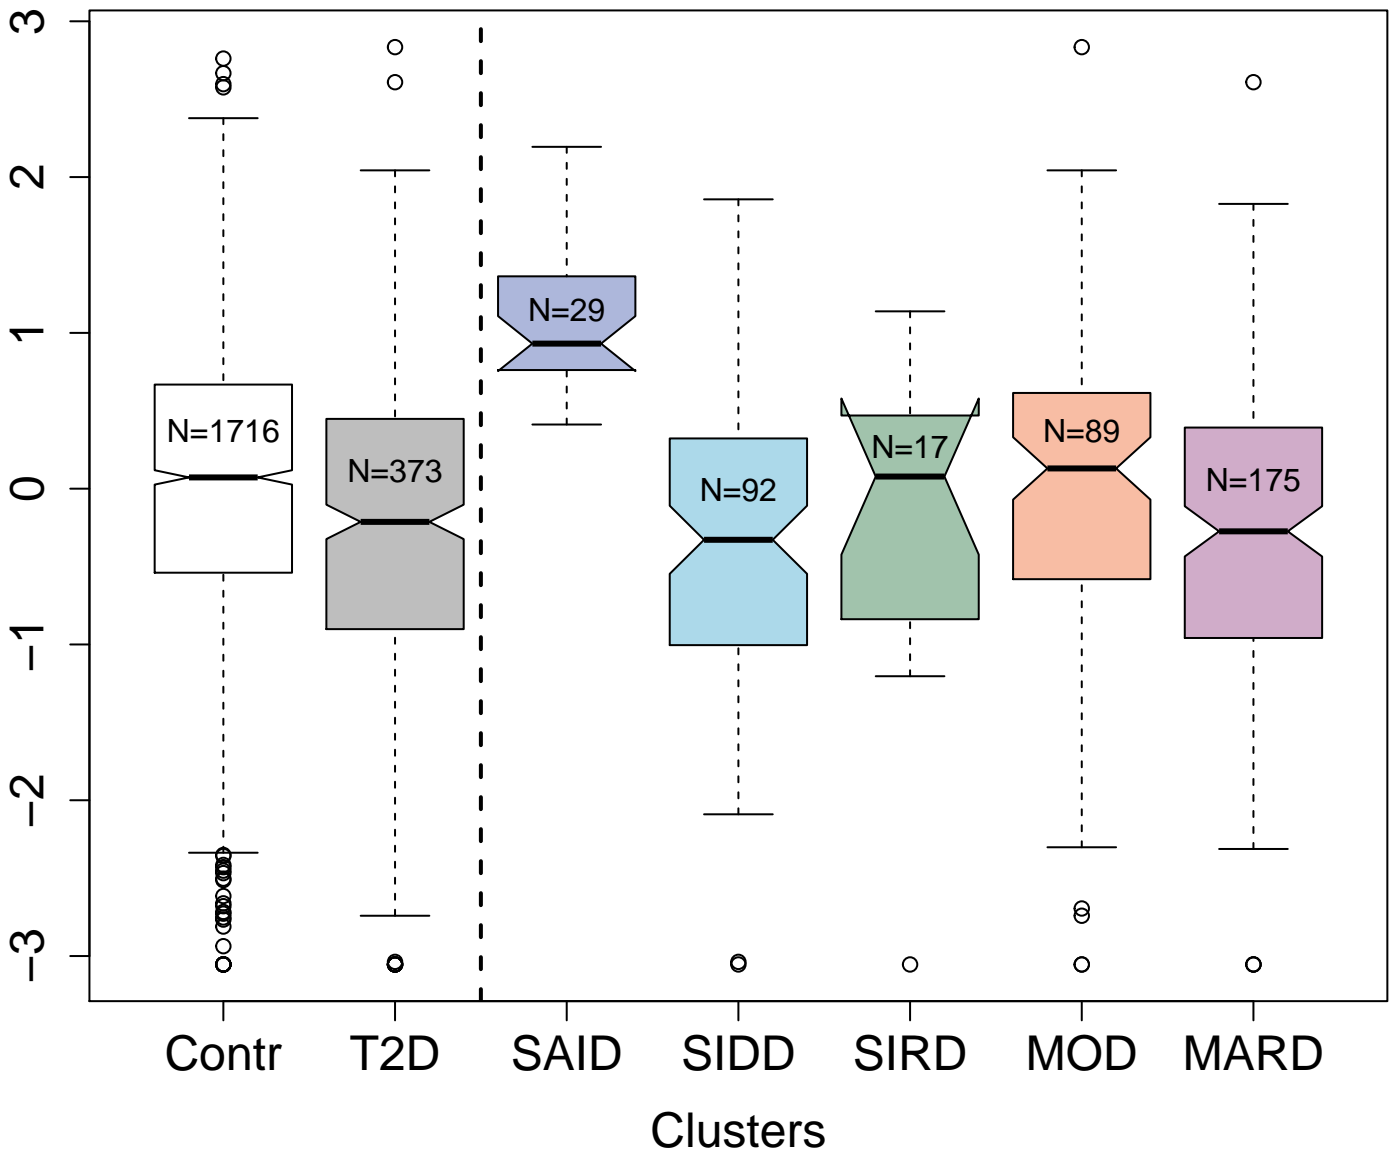

M48763 : 3-methoxycatechol sulfate (1)

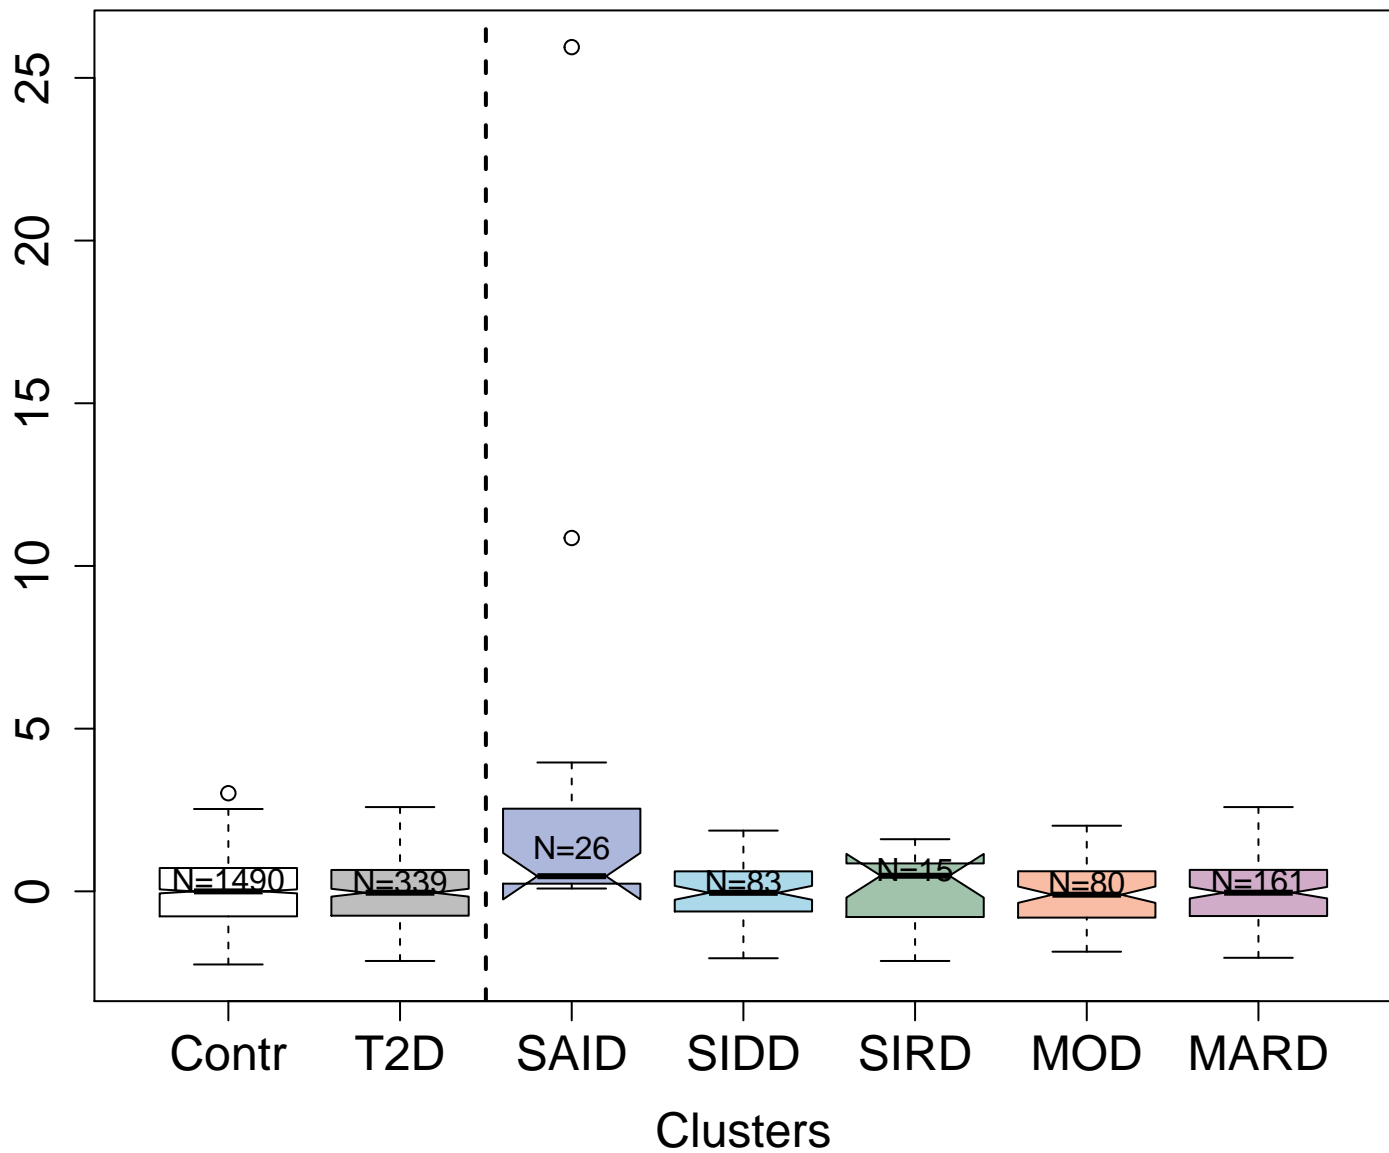



M22130 : phenyllactate (PLA)

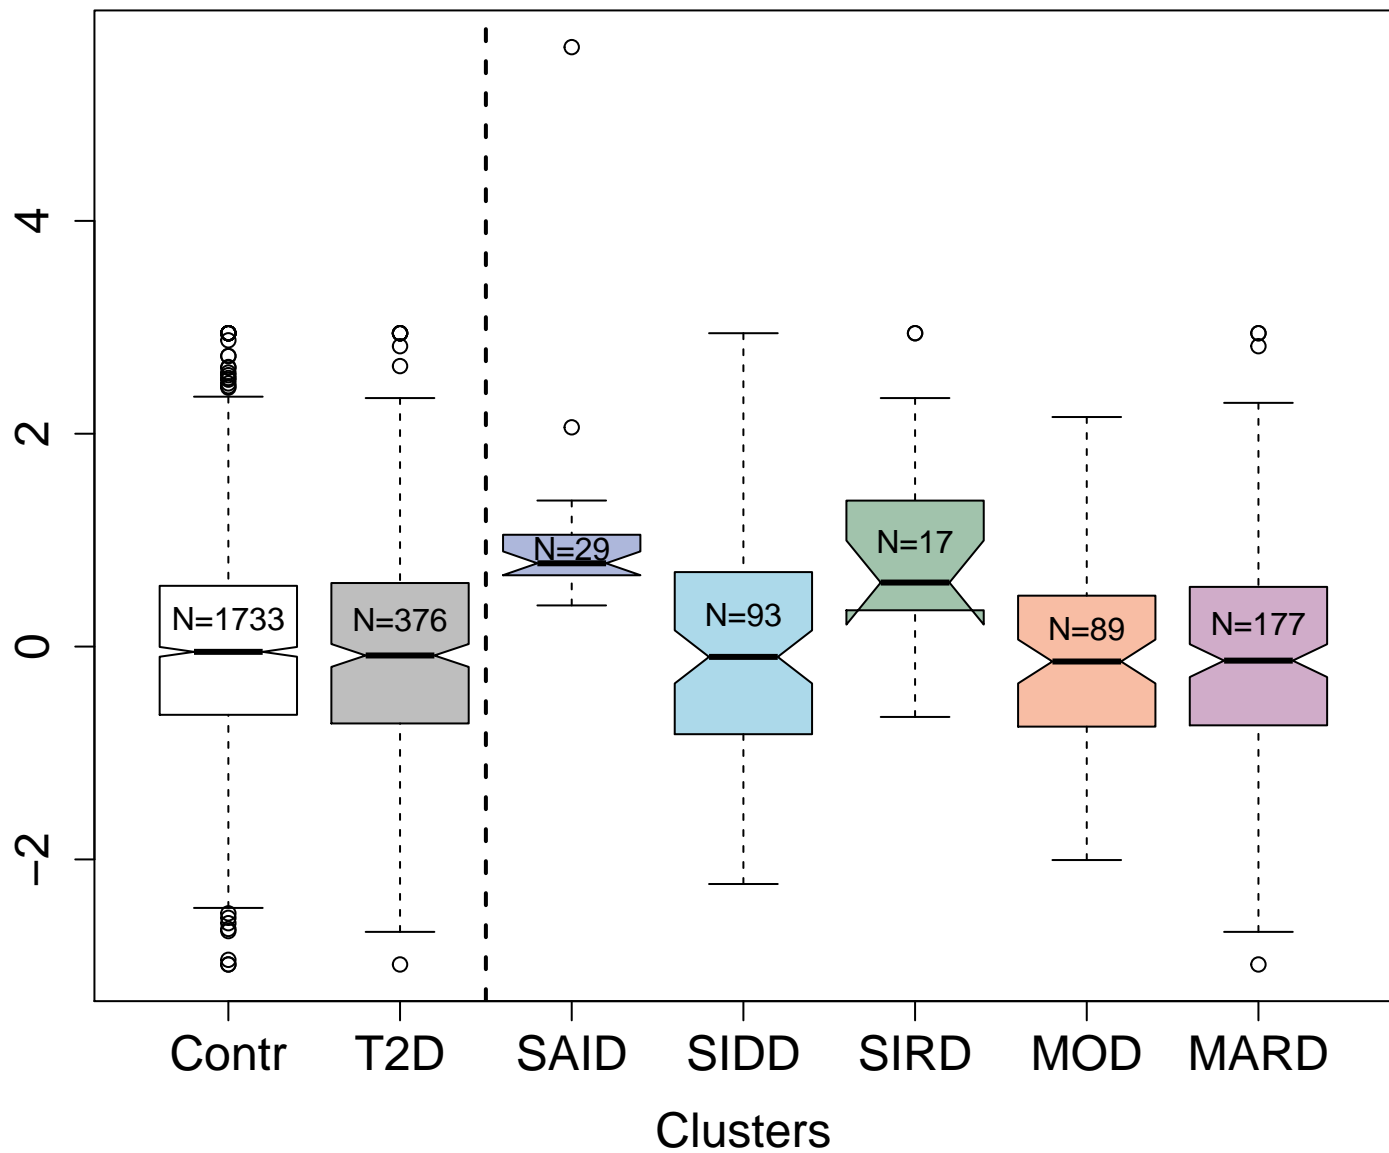

M31943 : 3-hydroxysebacate

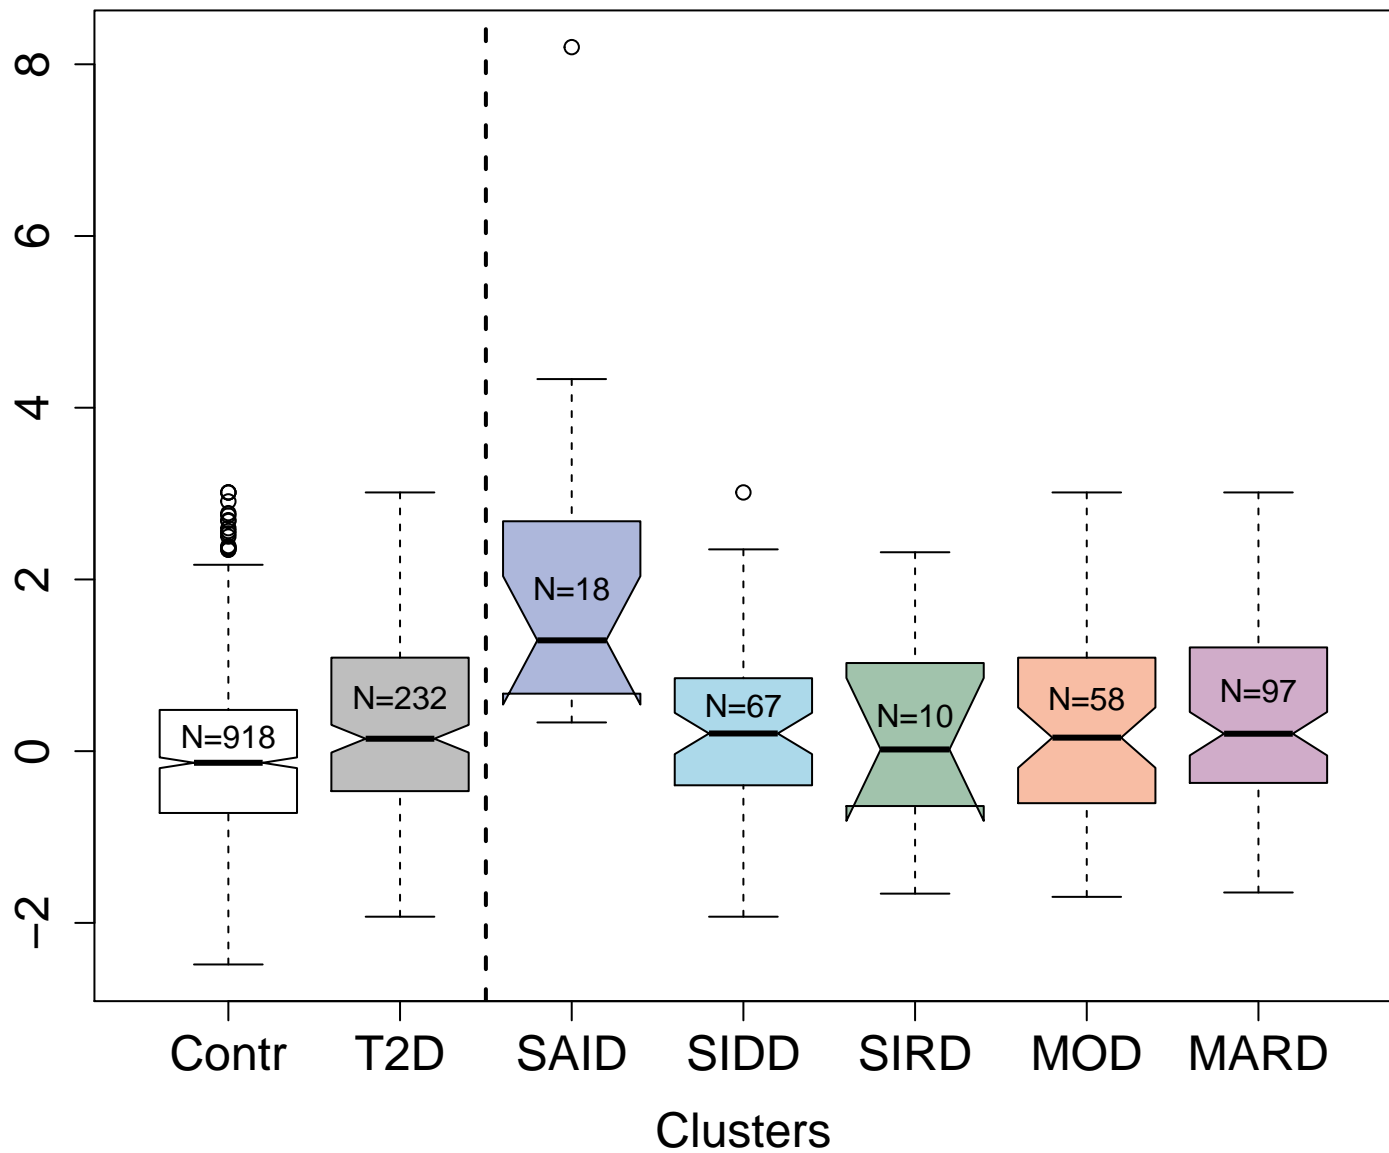

M52716 : 1-(1-enyl-palmitoyl)-2-palmitoyl-GPC (P-16:0/16:0)

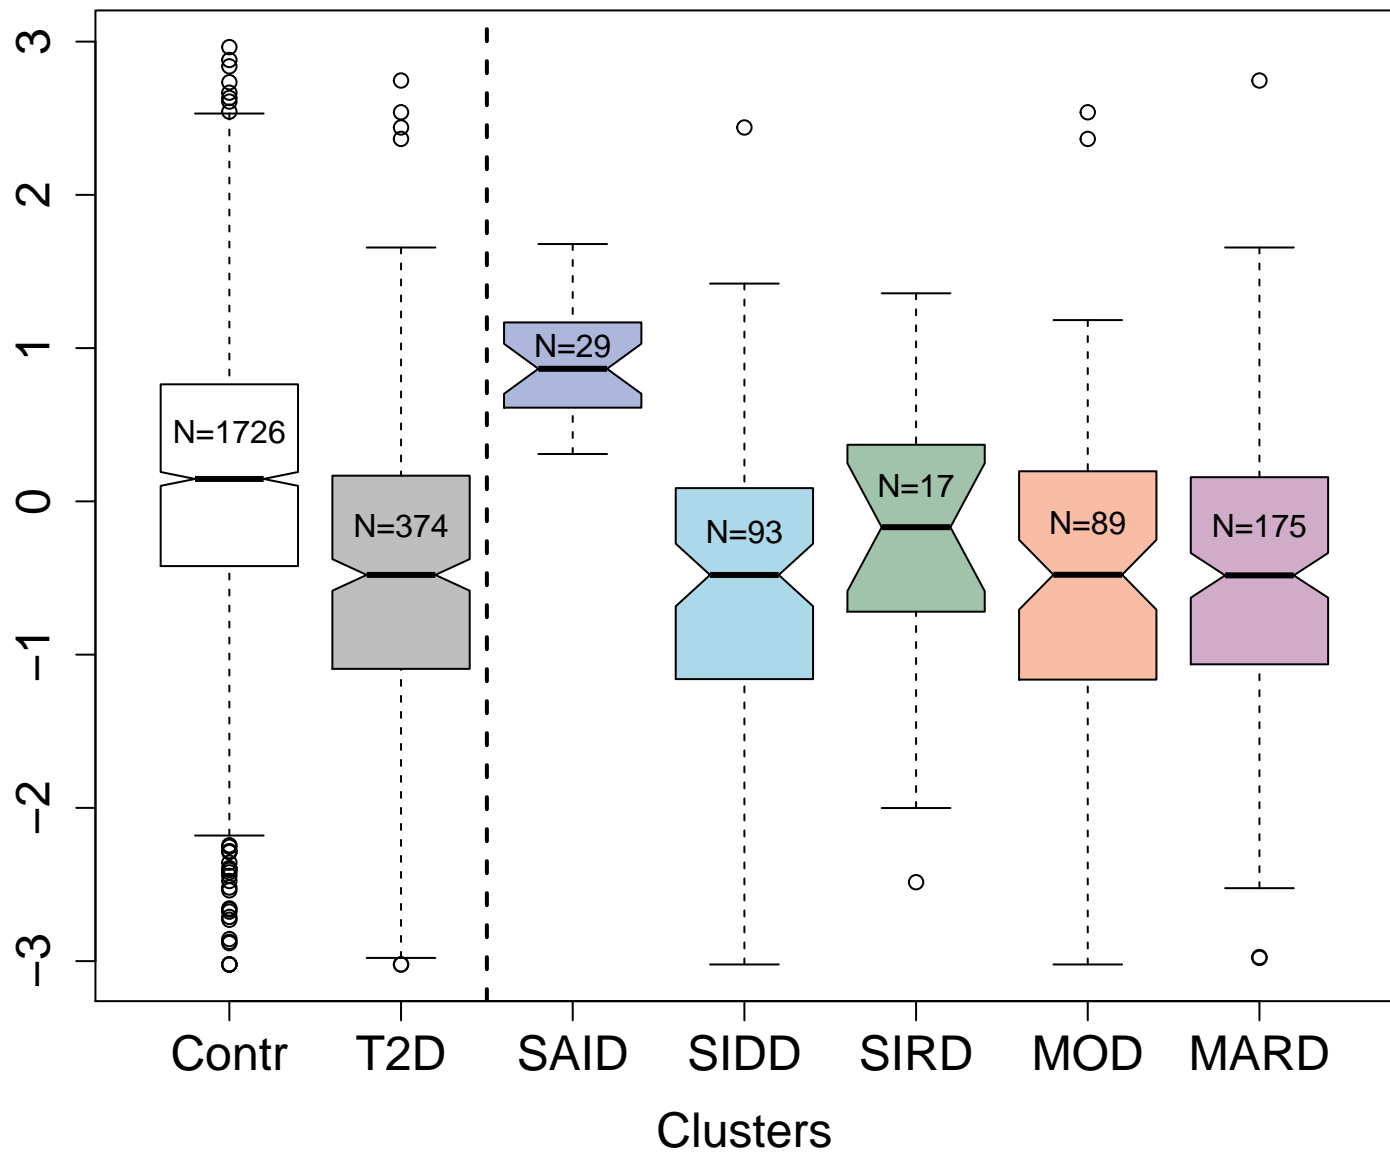

M47112 : etiocholanolone glucuronide

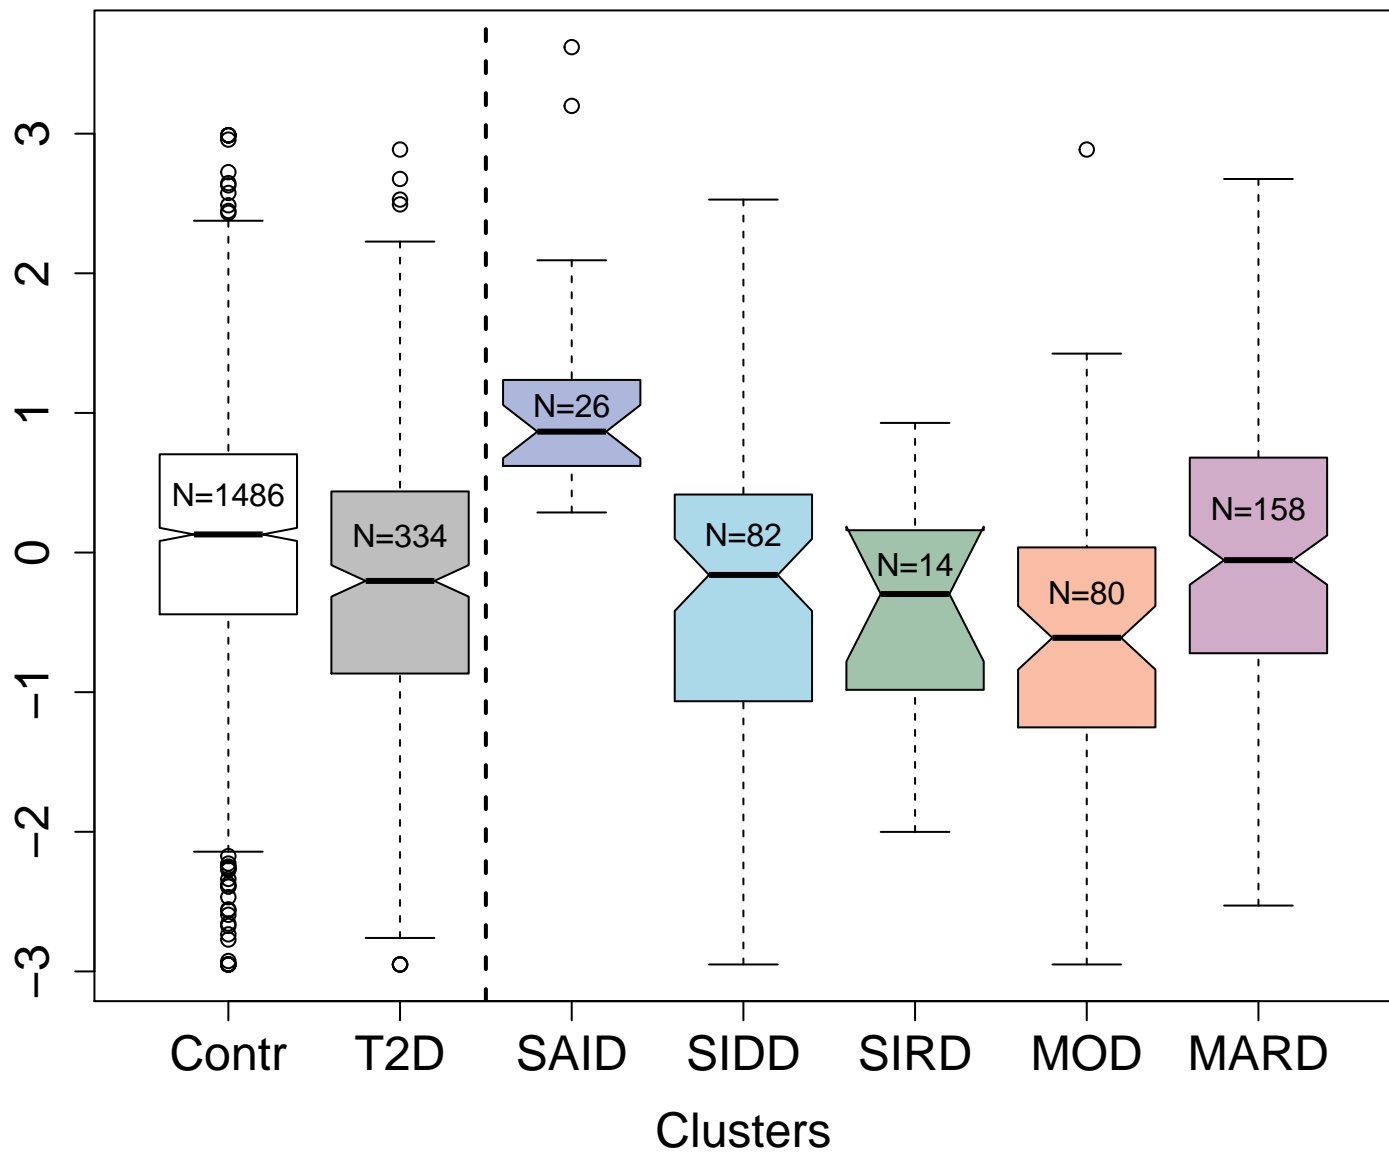

M48445 : 2-methoxyresorcinol sulfate

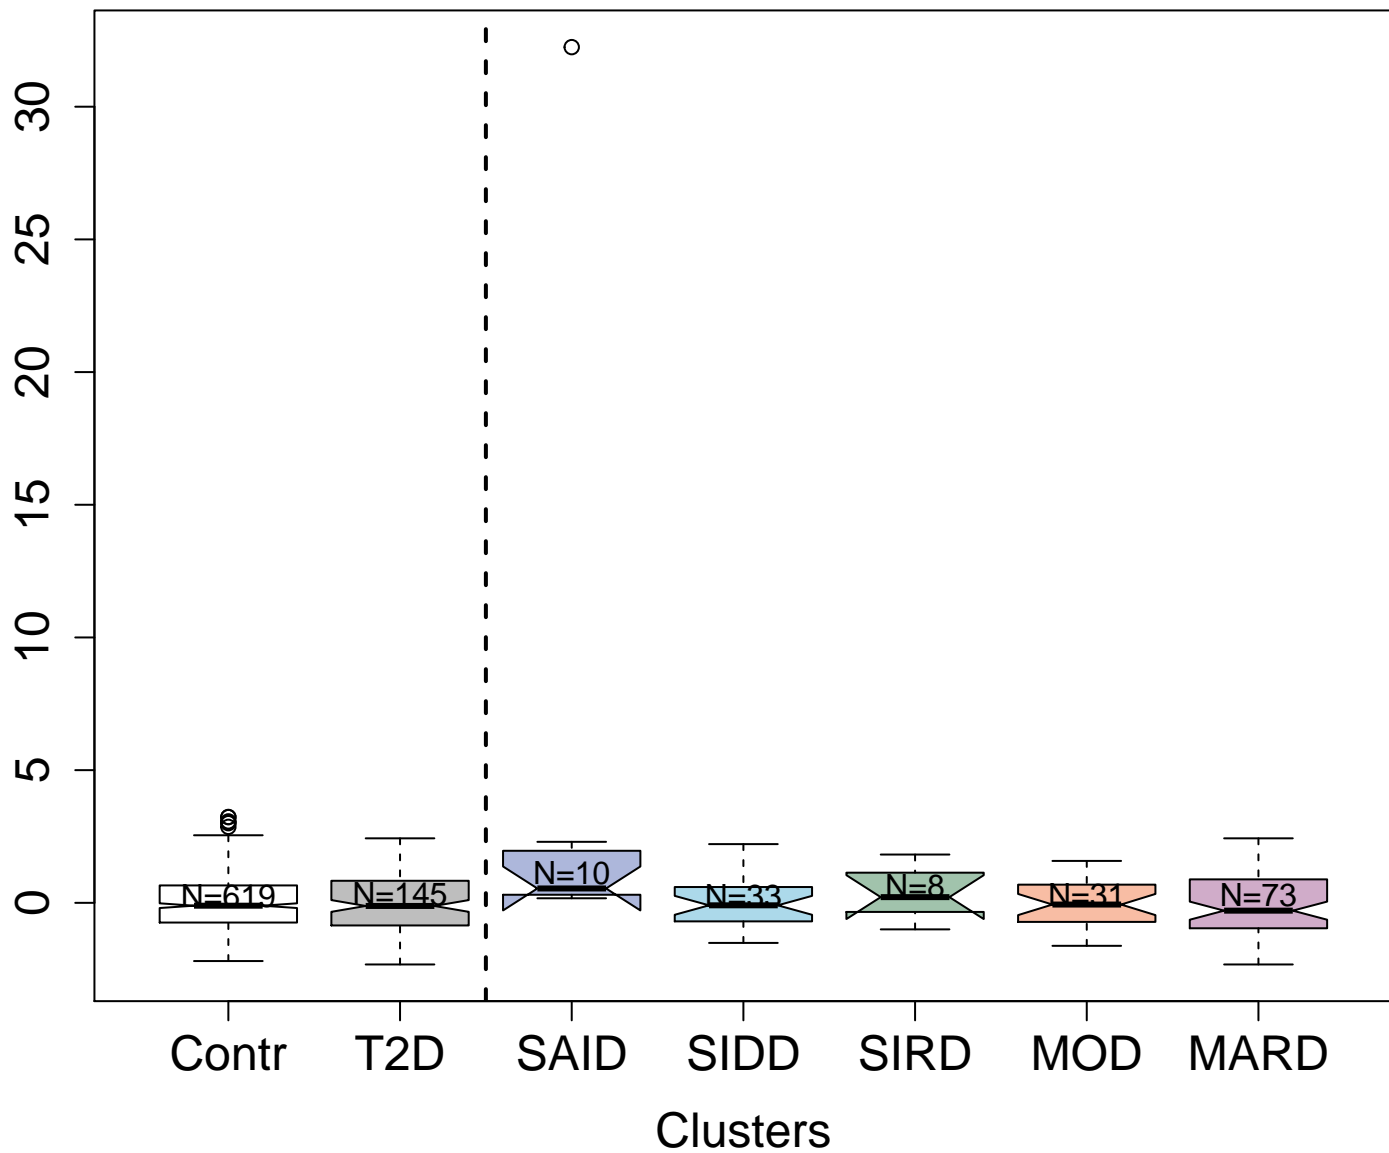

M46602 : X - 11478

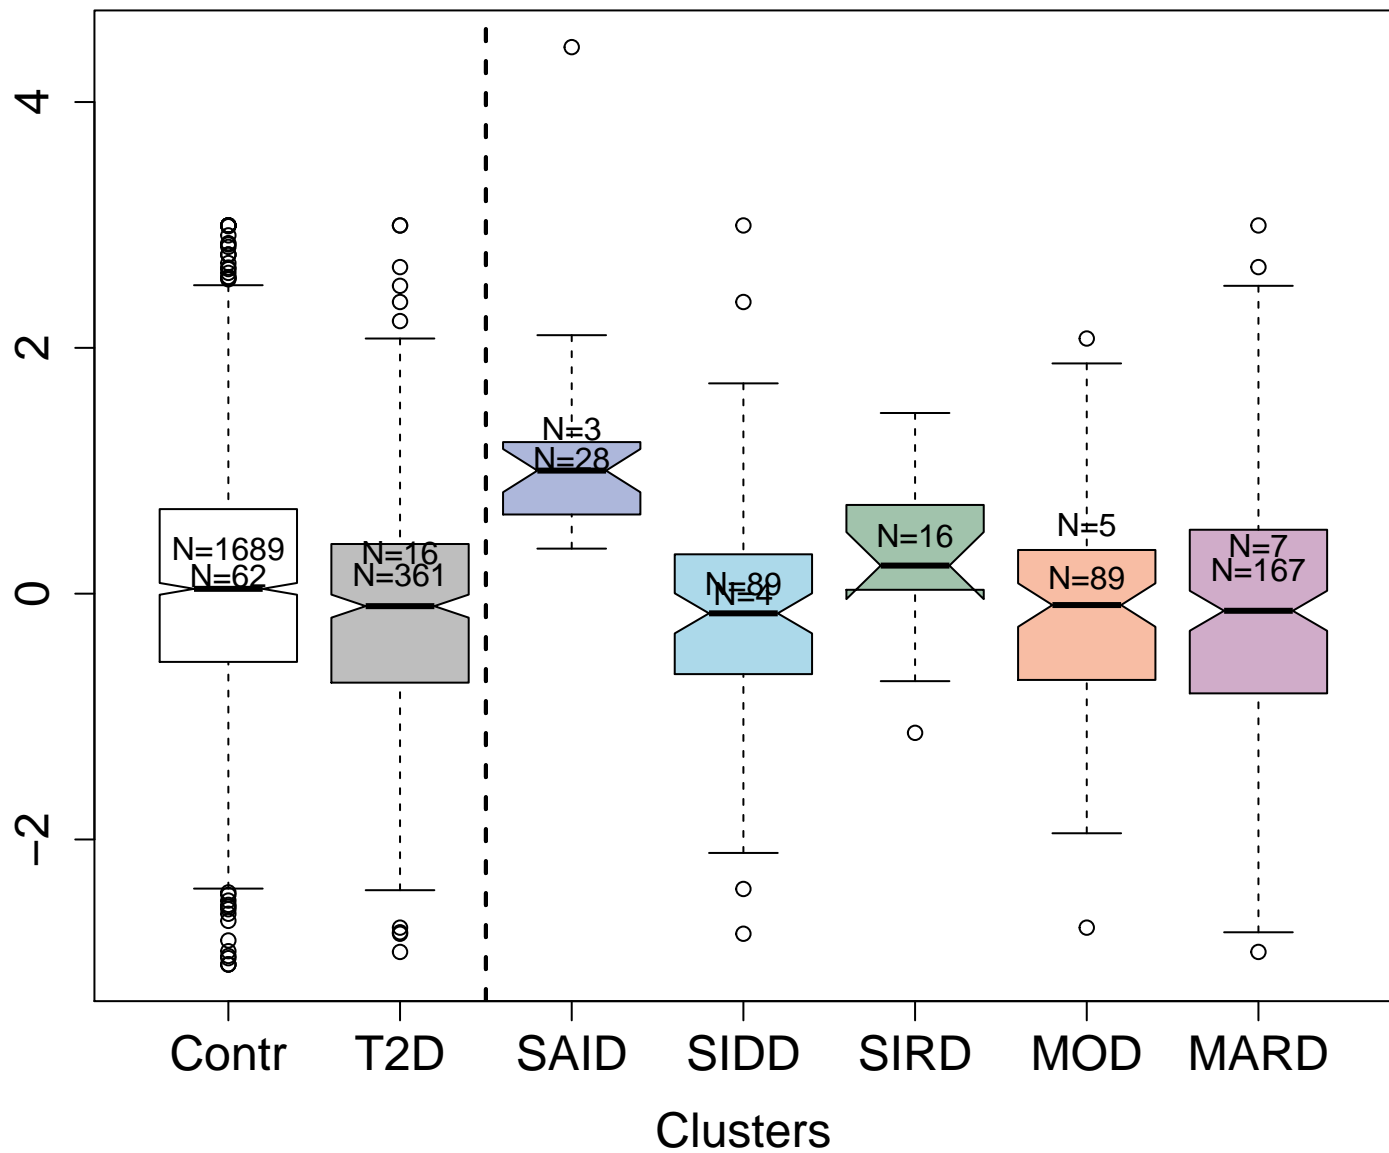

M39625 : hydrochlorothiazide

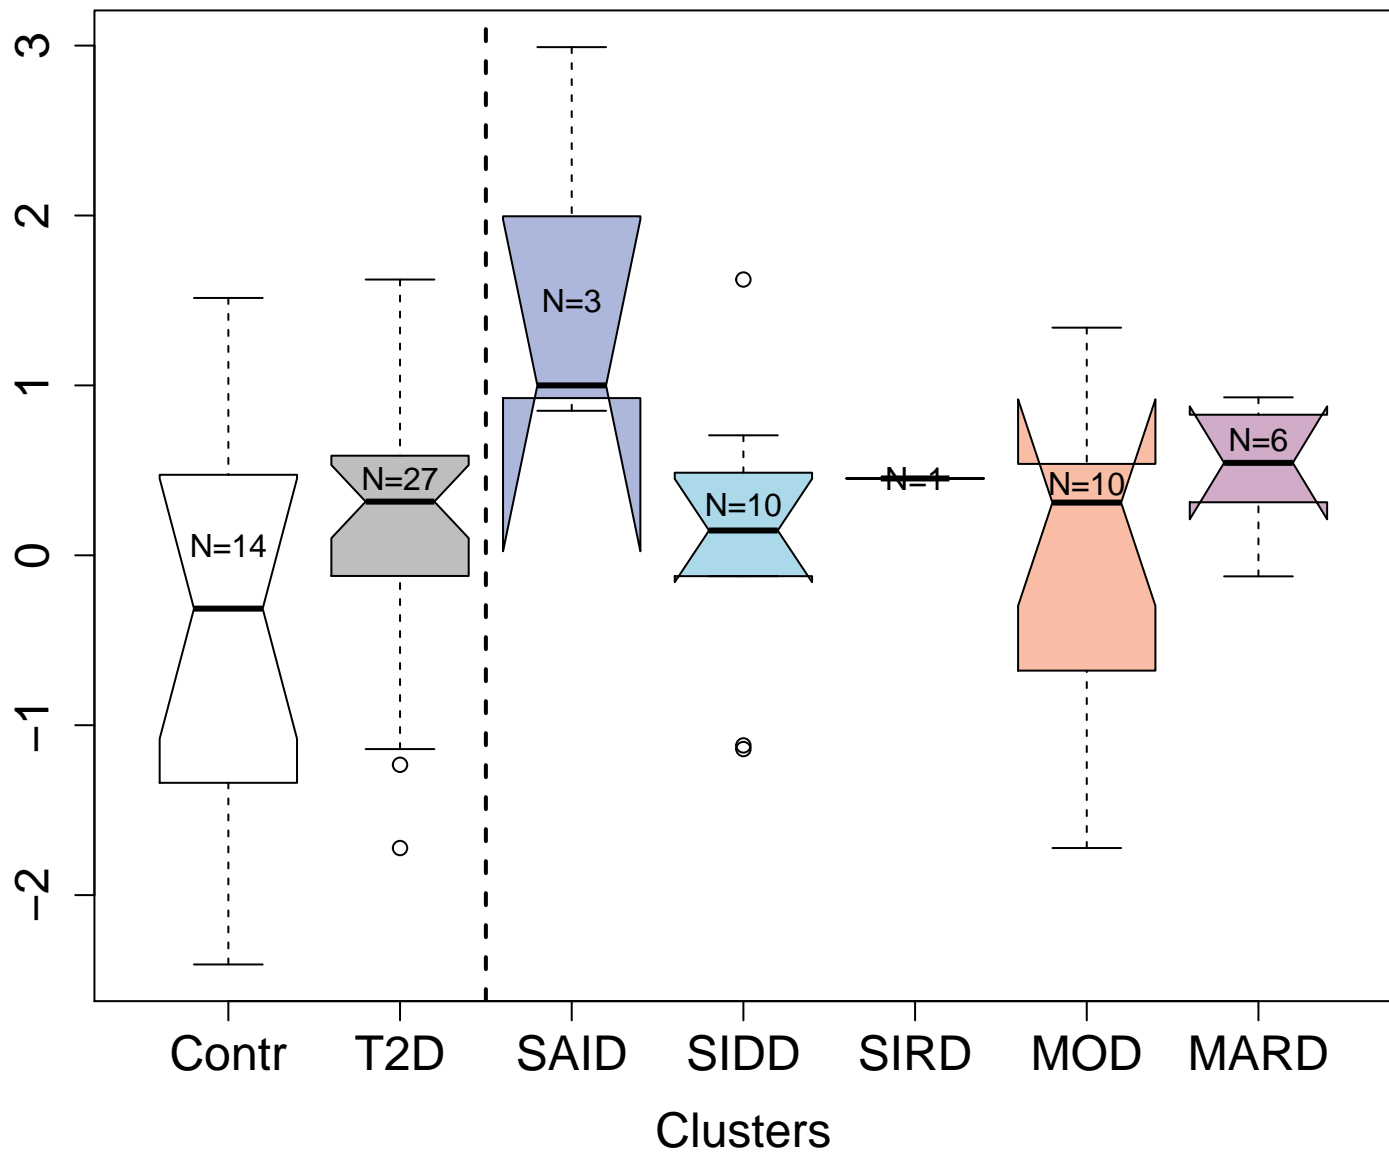

M46295 : X - 21286

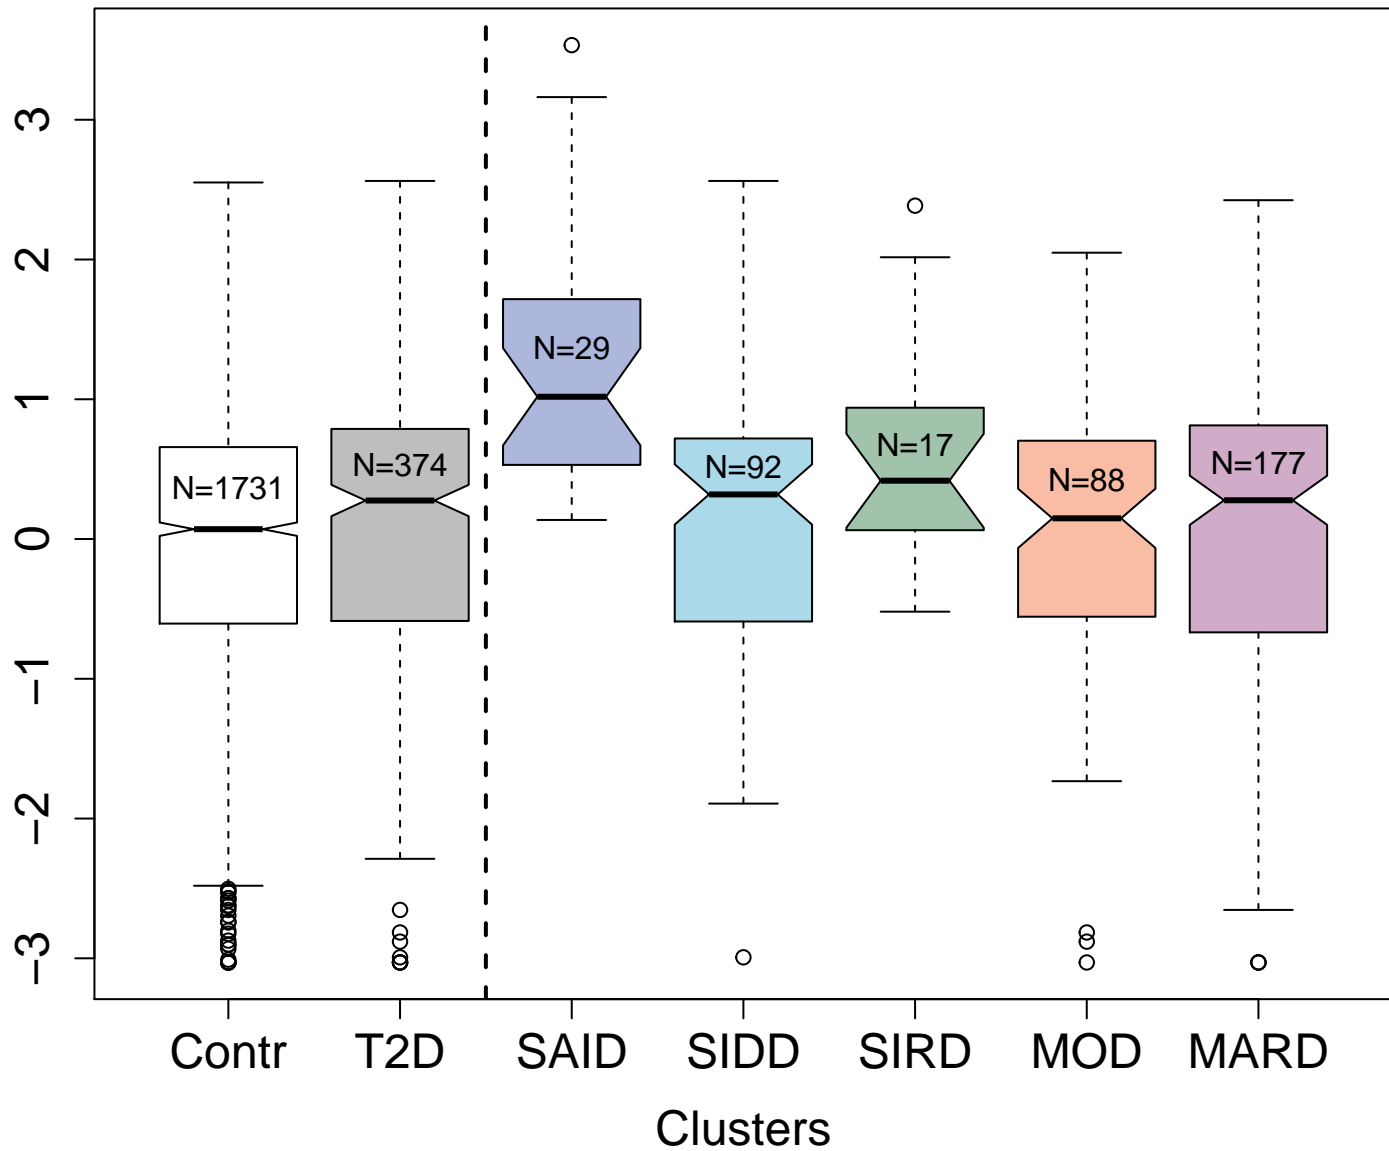



M18497 : taurocholate

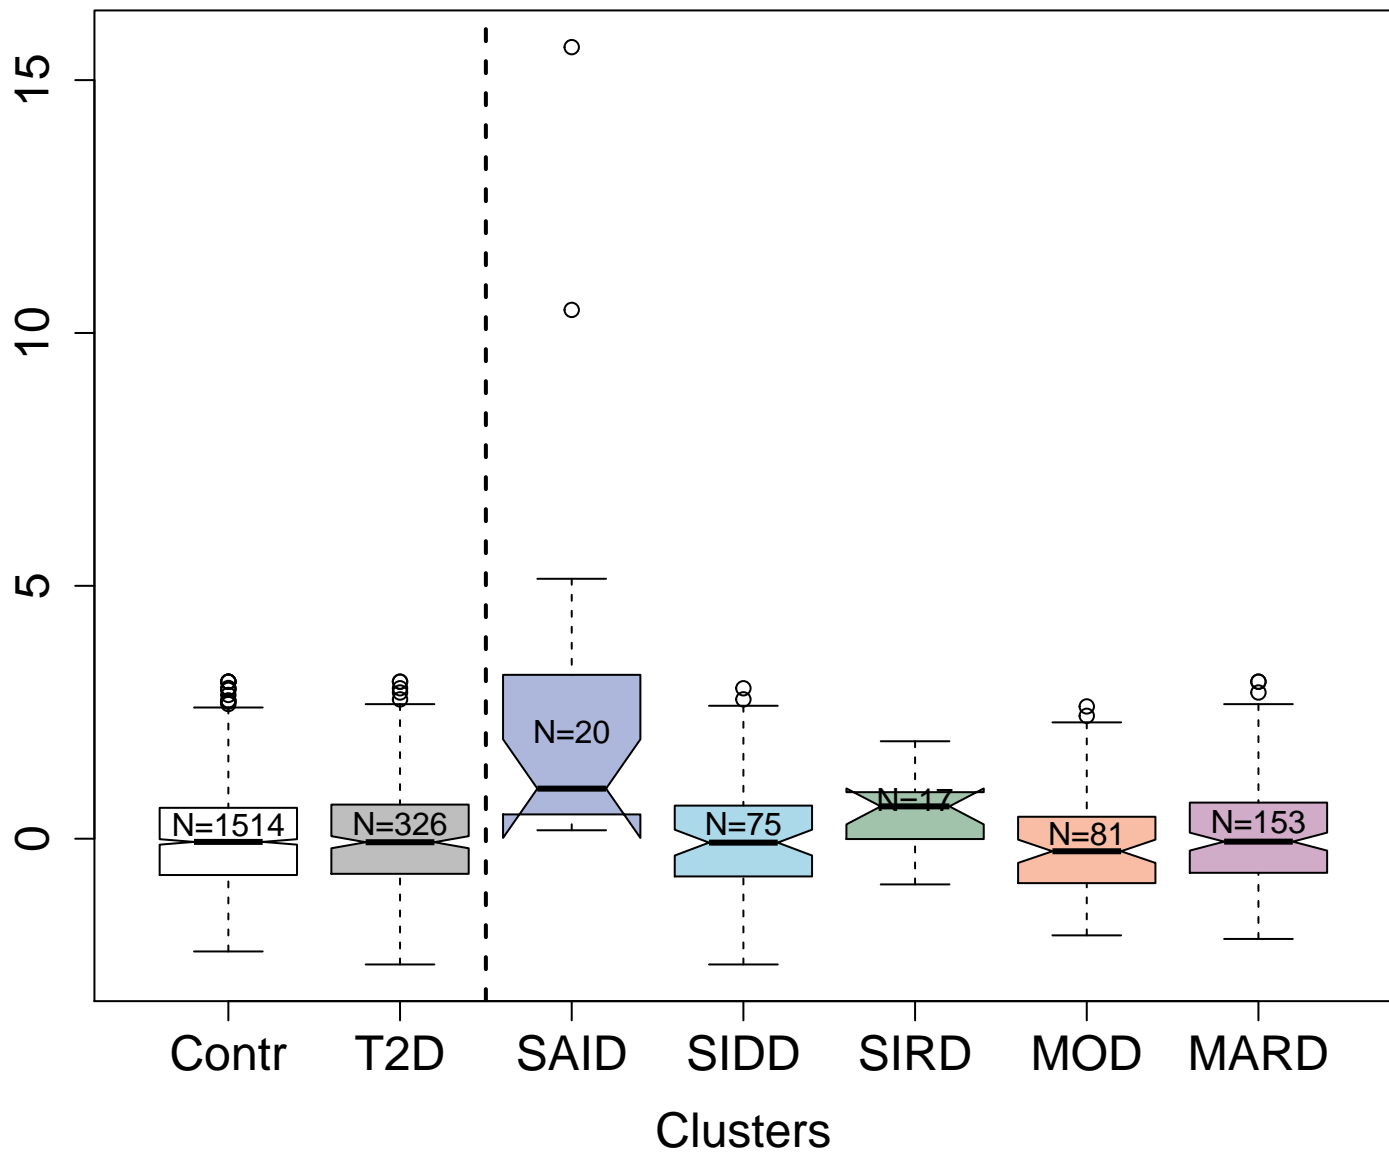

M46672 : X - 17325

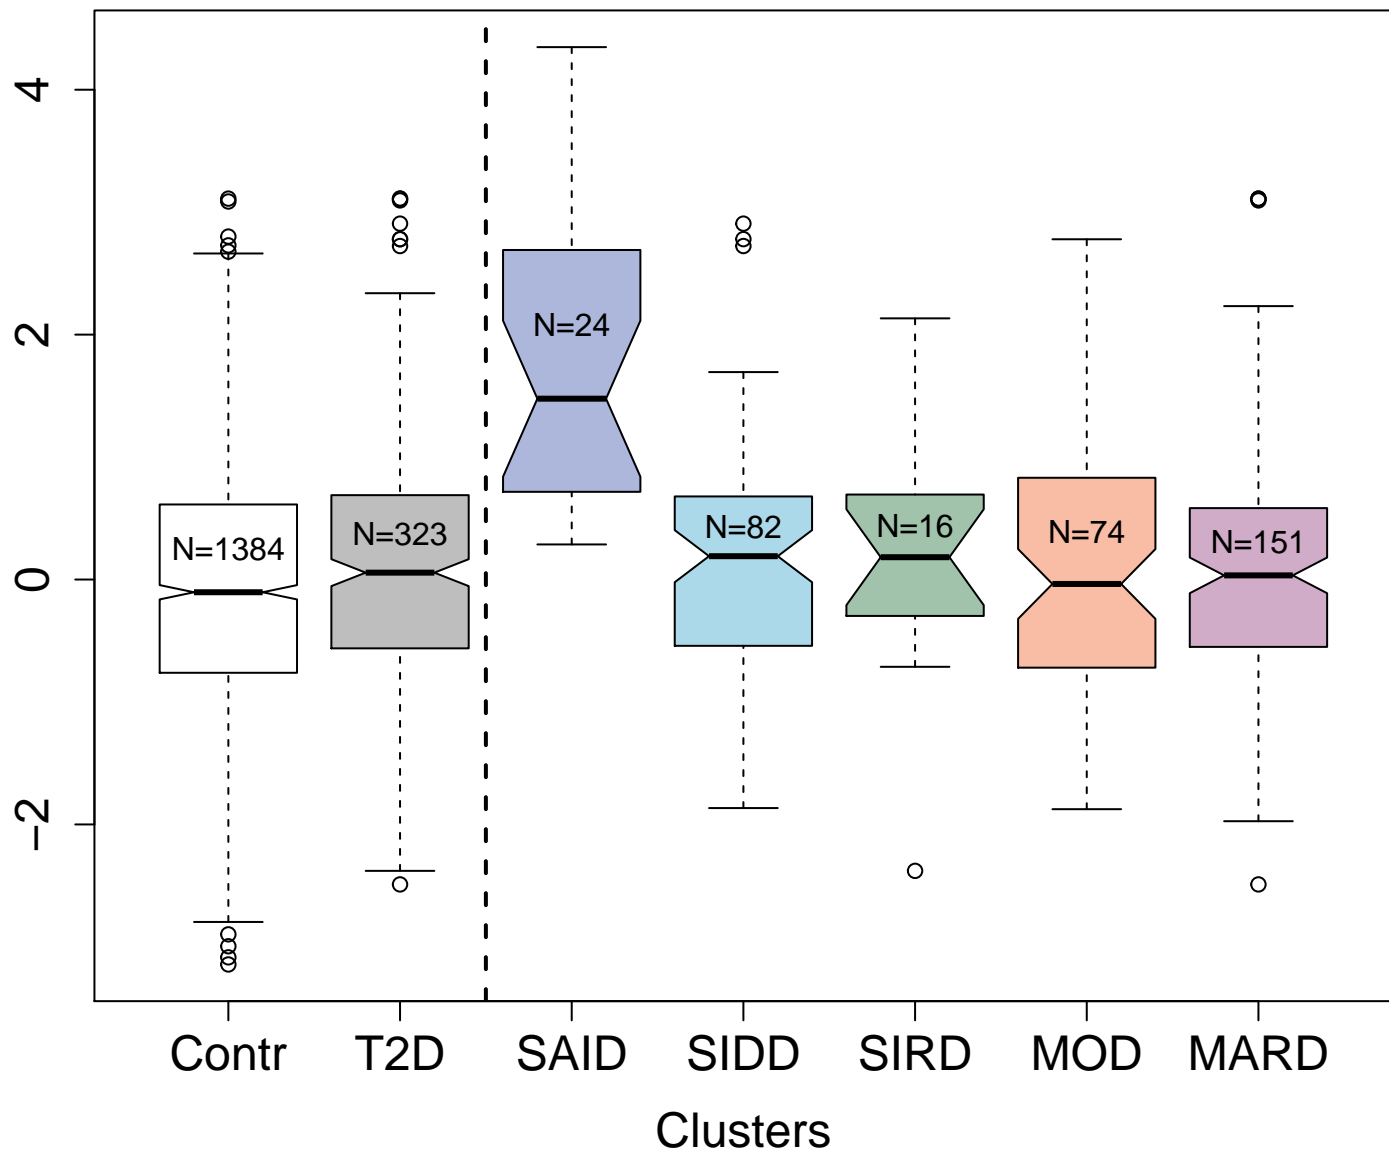

M52603 : 1,2-dilinoeoyl-GPC (18:2/18:2)

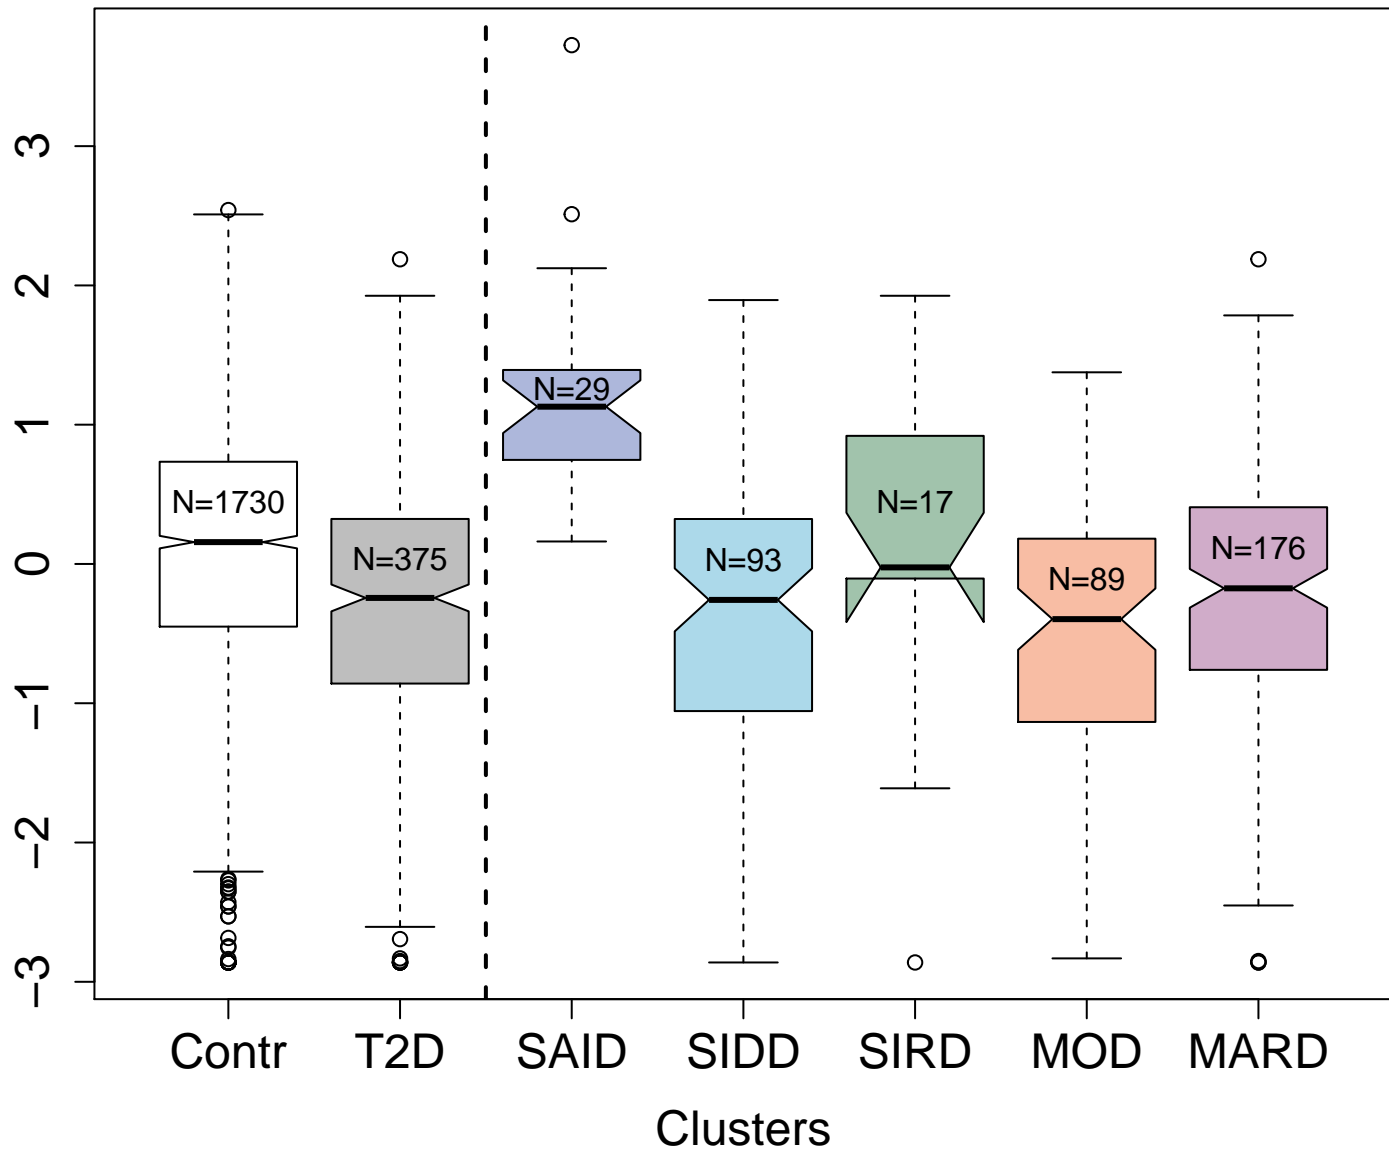

M46165 : 3-methyl catechol sulfate (1)

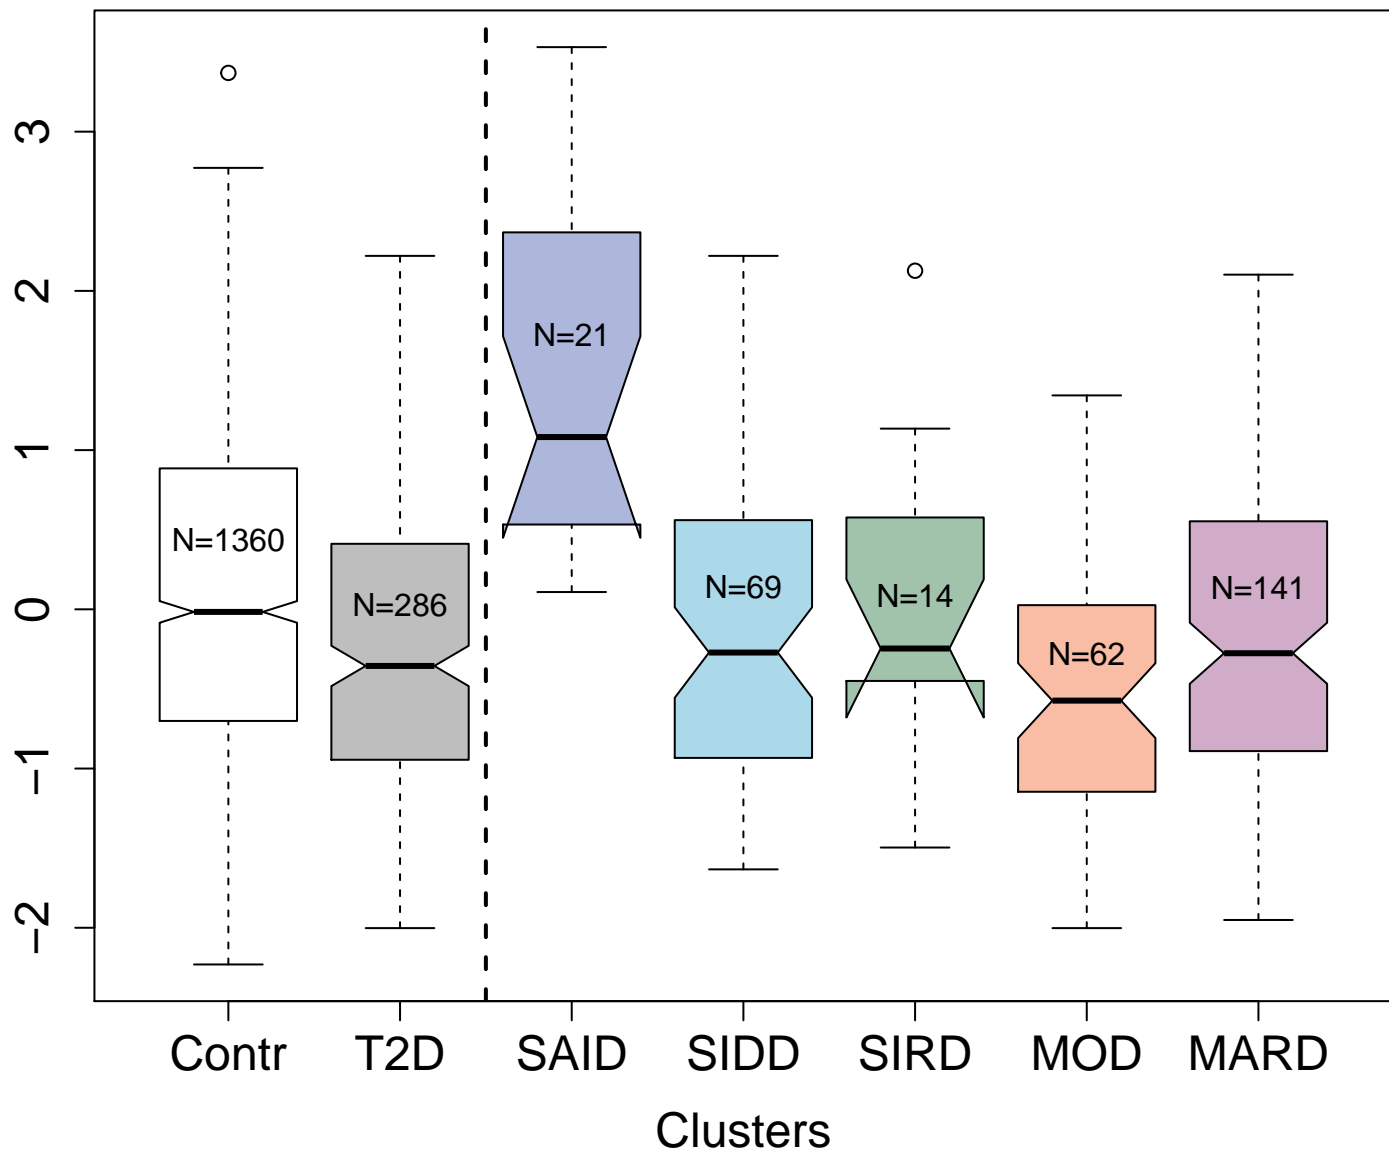

M52438 : 1-stearoyl-2-oleoyl-GPC (18:0/18:1)

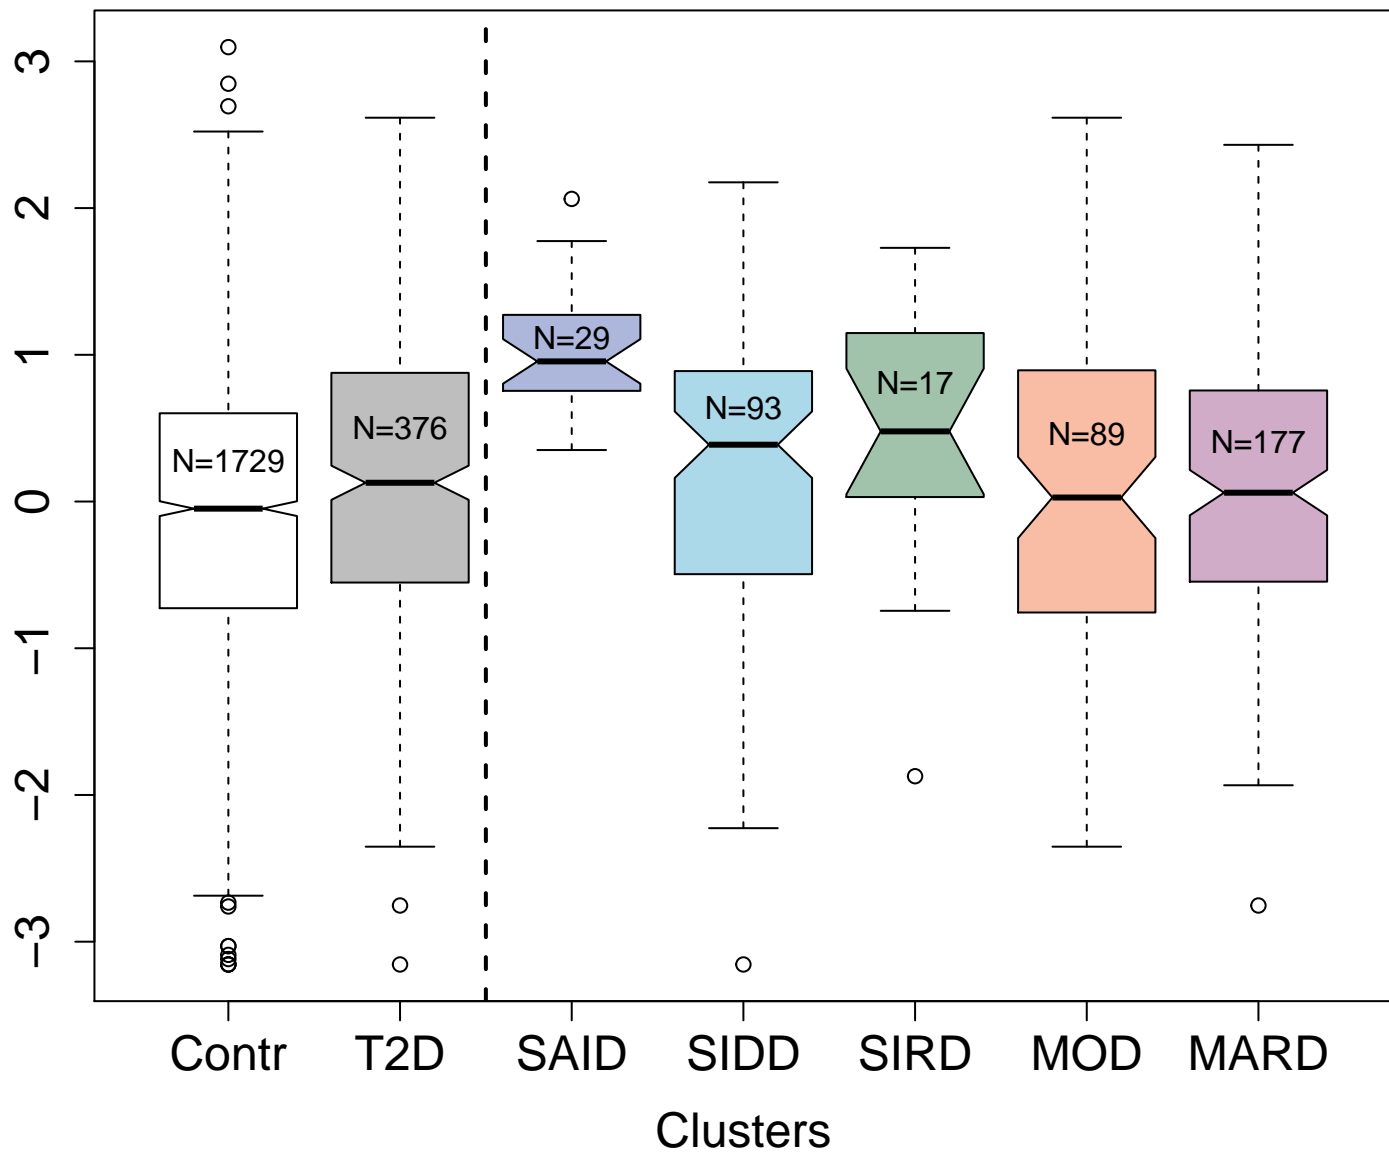

M47686 : X - 12096

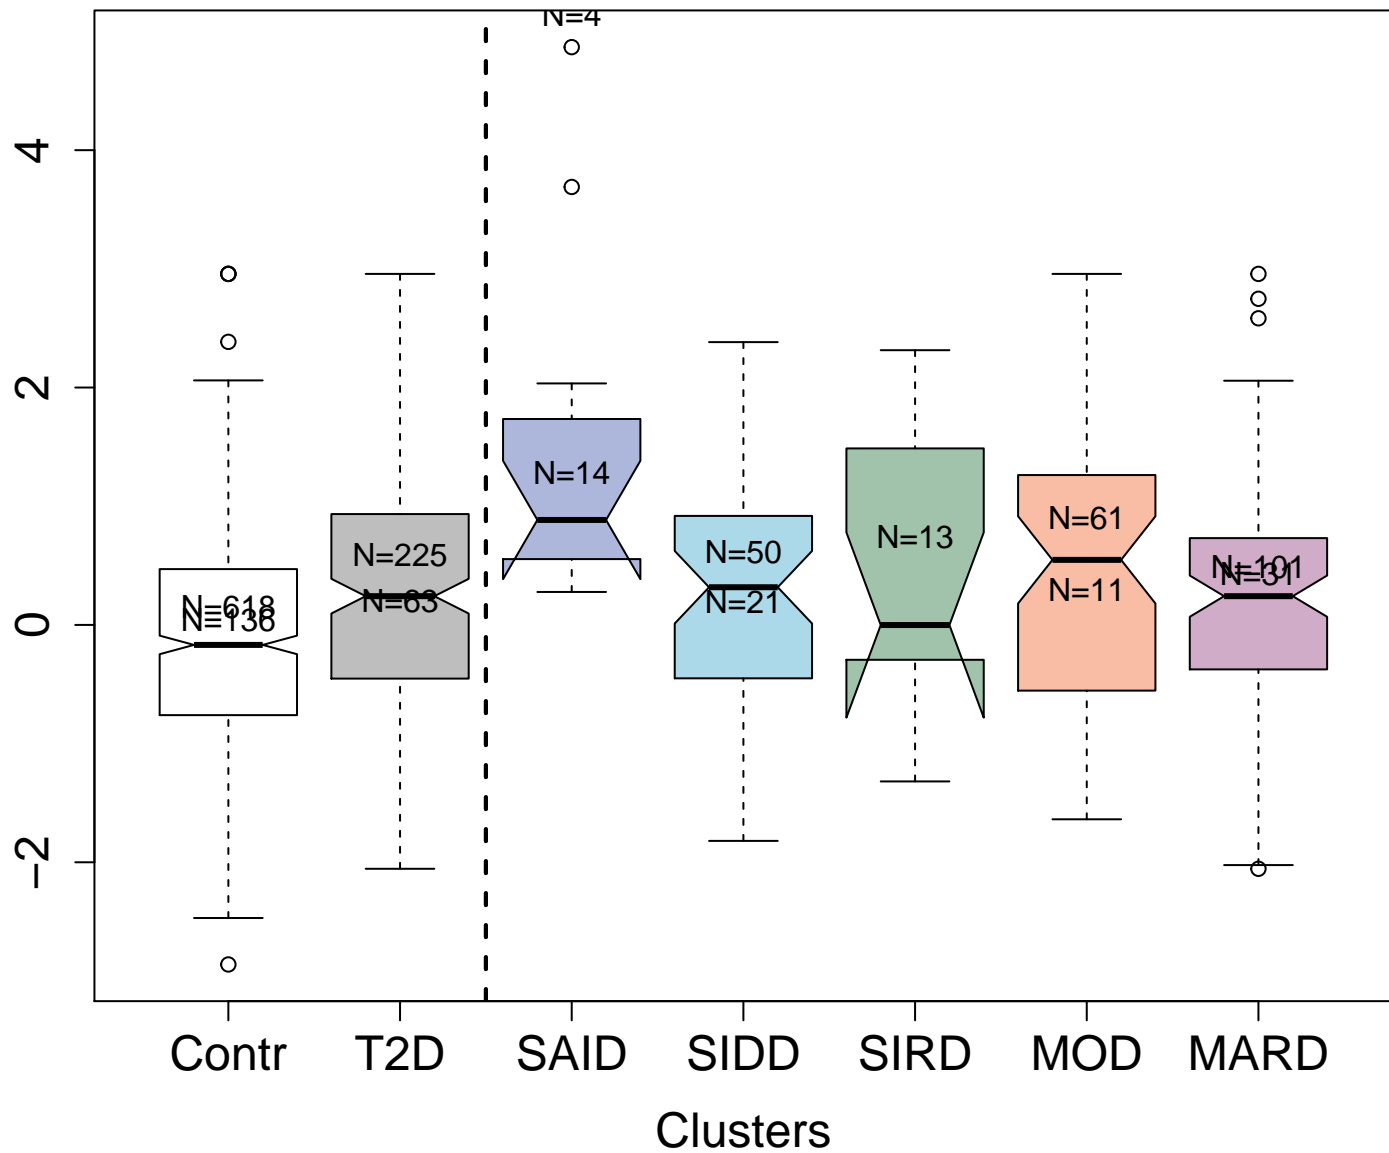

M34365 : 3-(cystein-S-y)acetaminophen\*

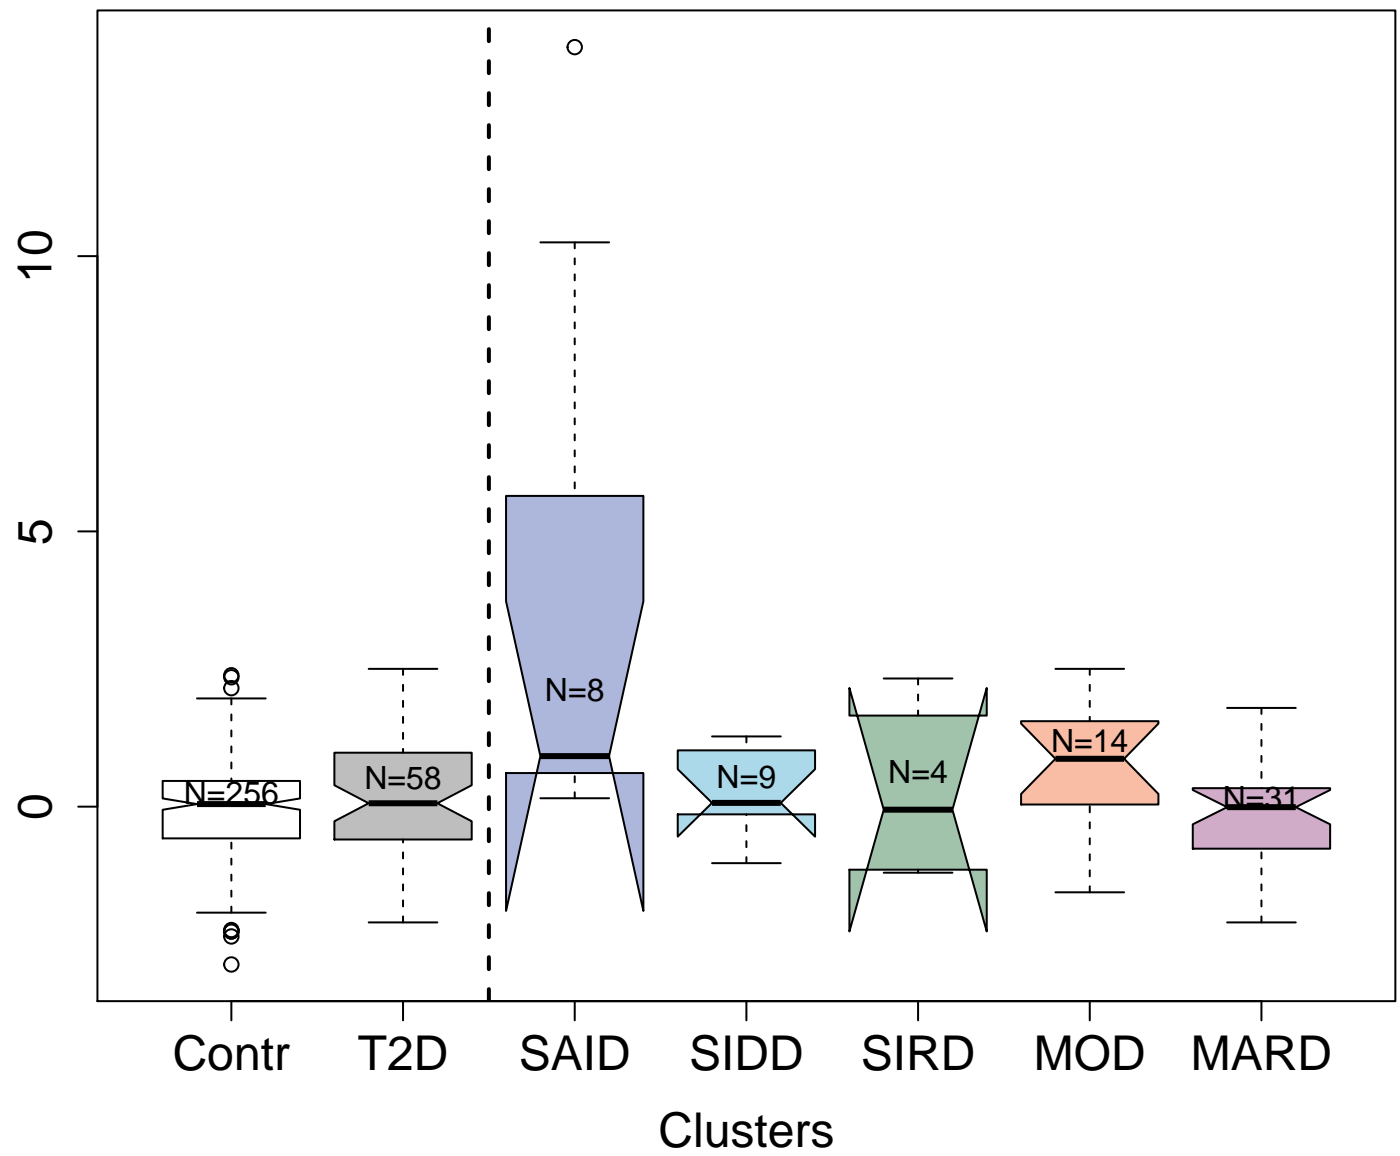

M39270 : 1-(1-enyl-palmitoyl)-GPE (P-16:0)\*

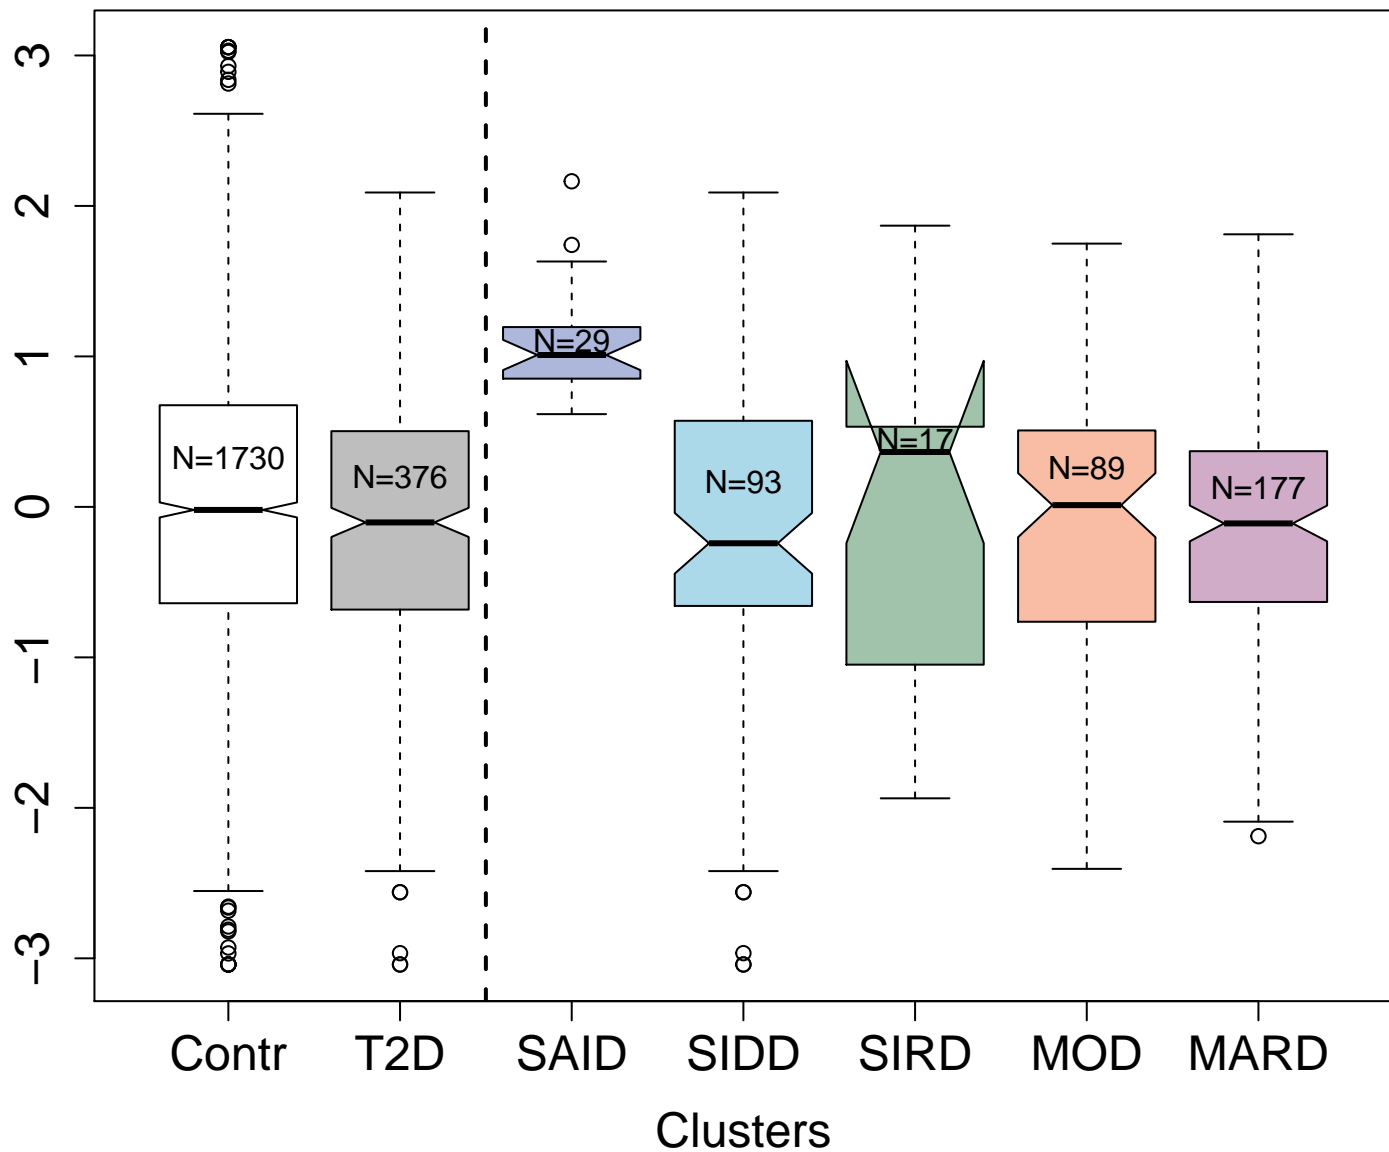



M37181 : 4-allylphenol sulfate

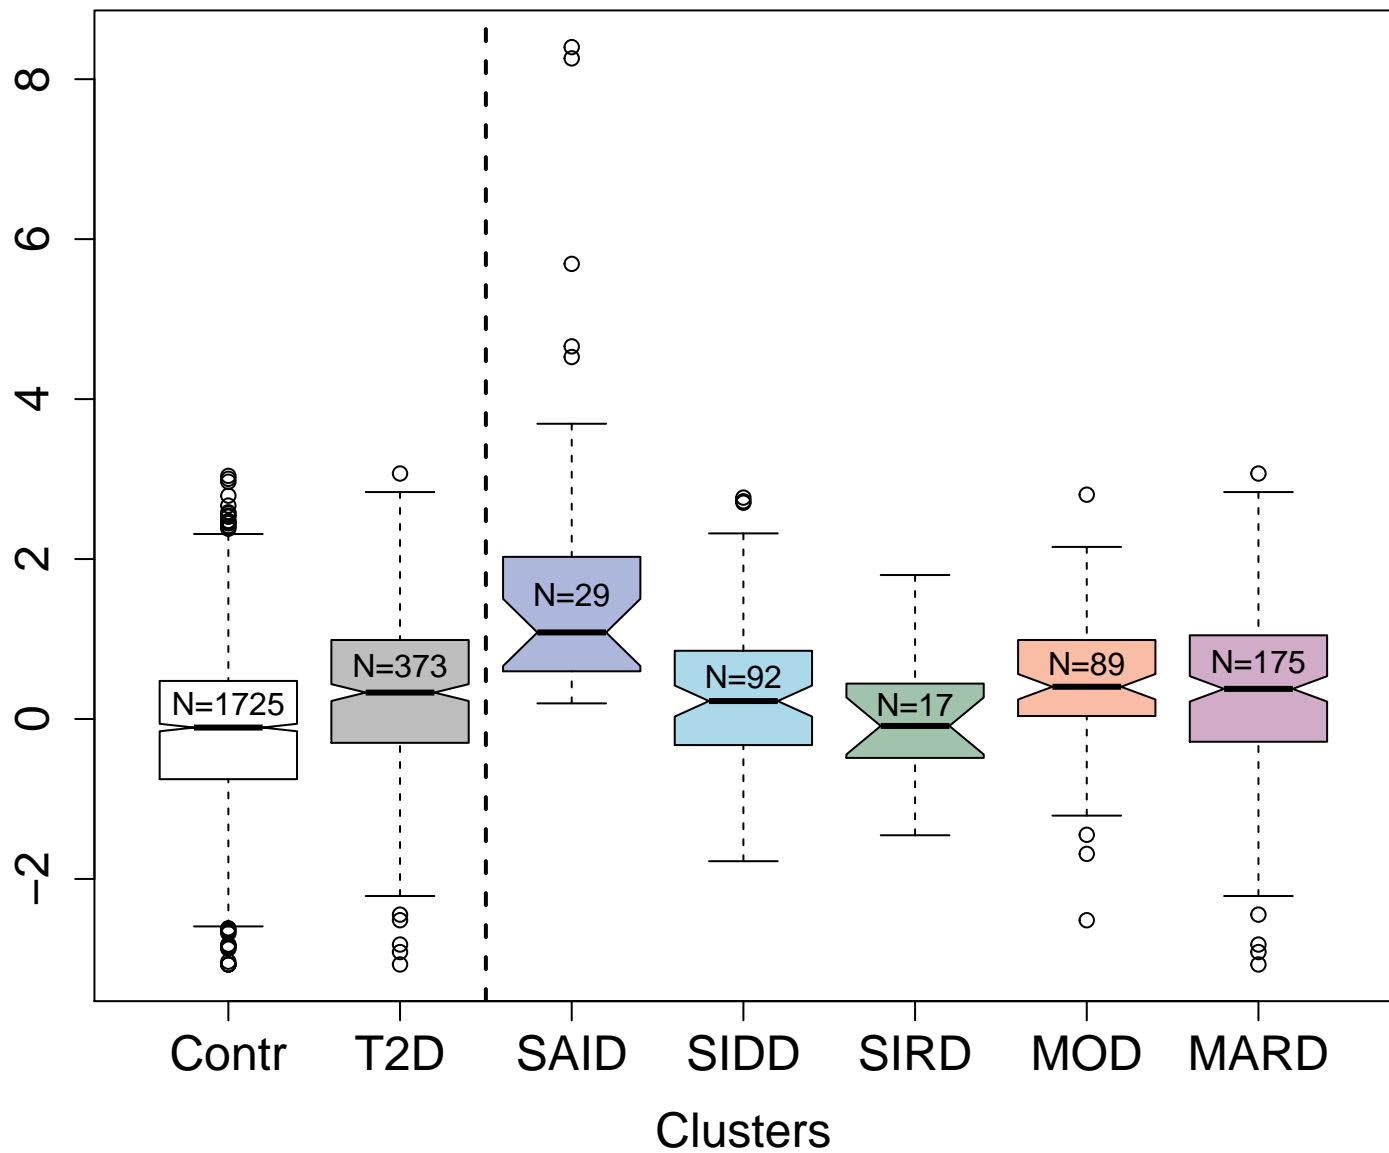

M33967 : N-acetylisoleucine

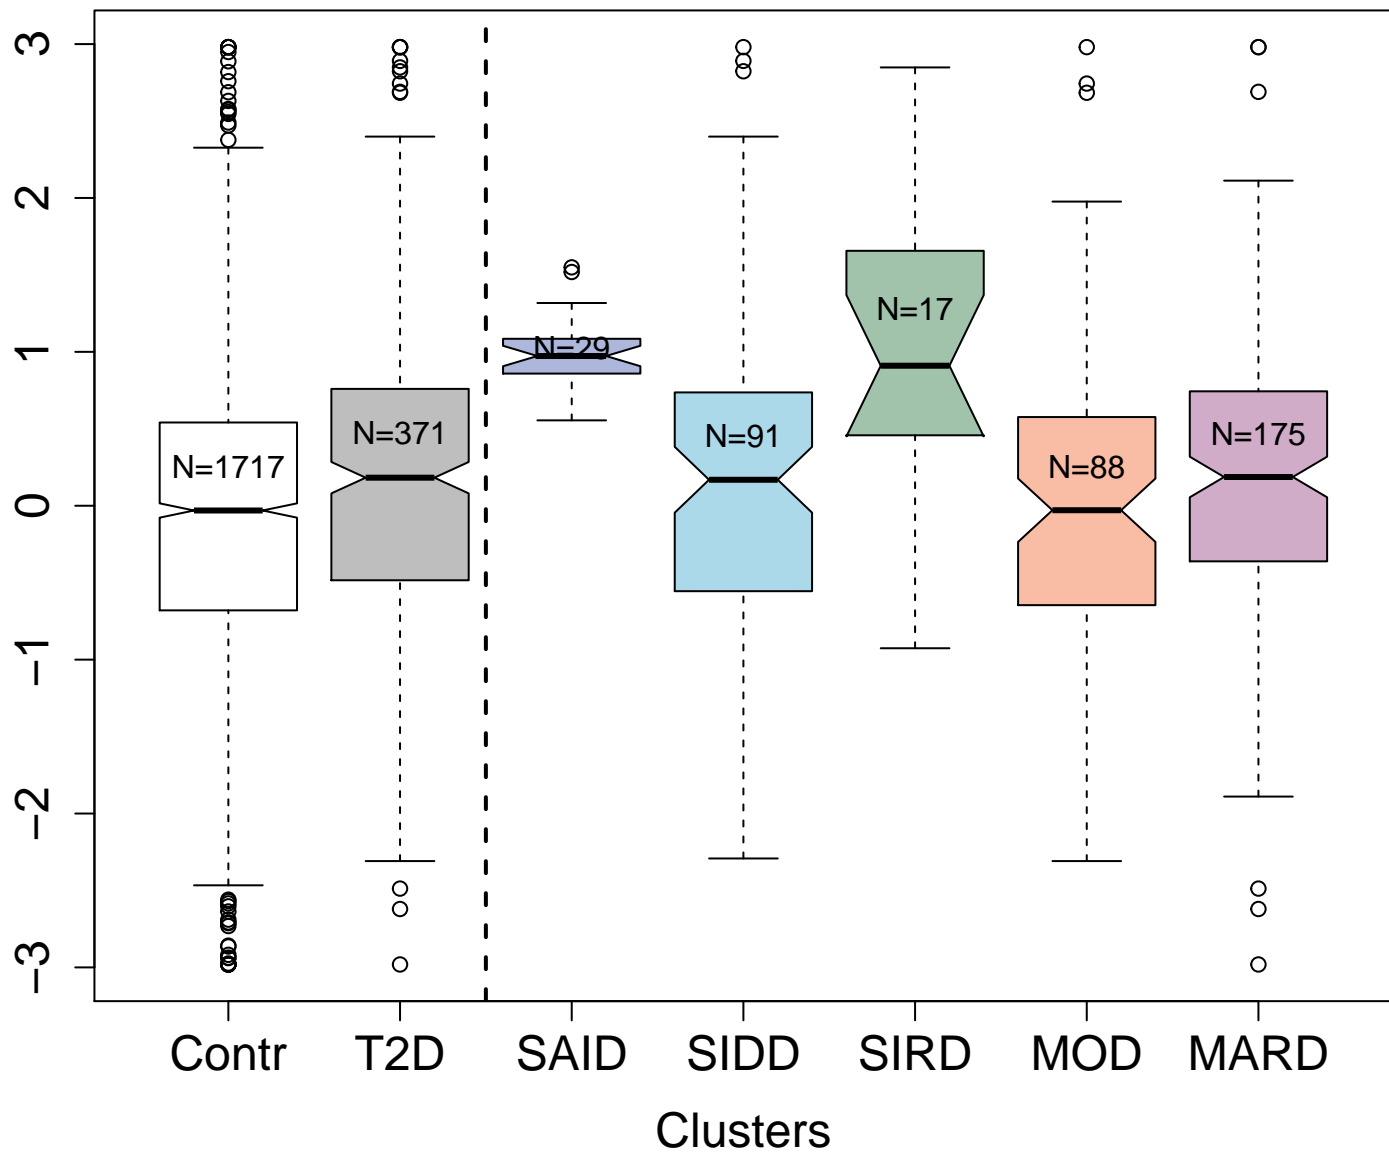

M1519 : sucrose

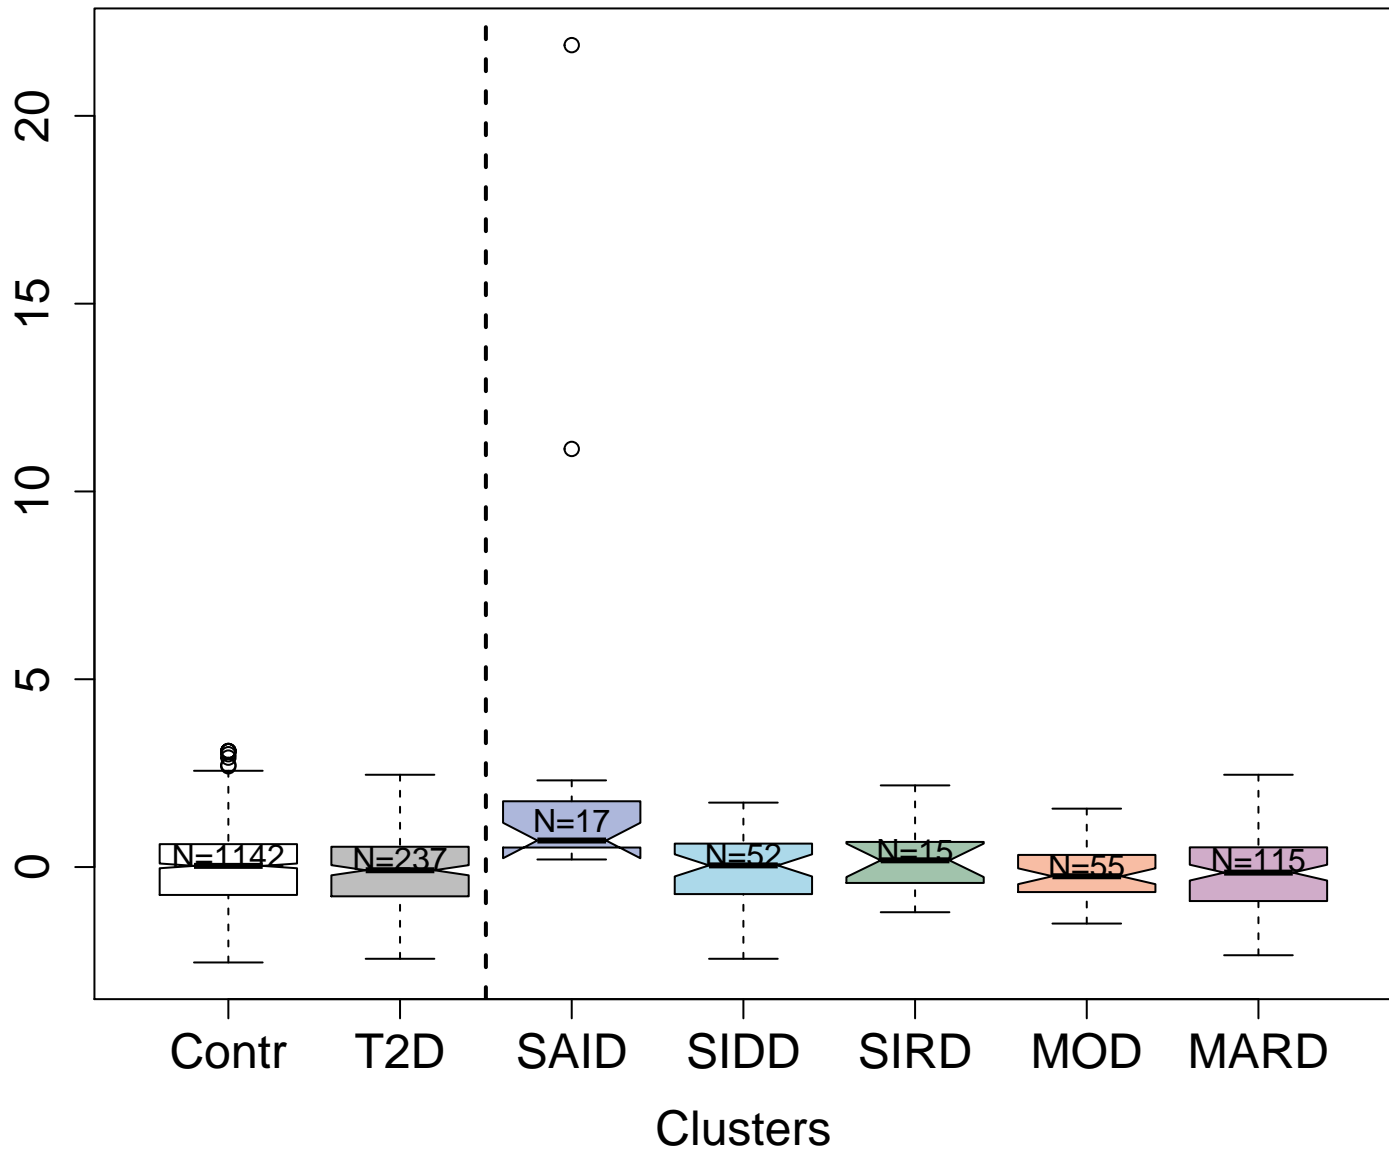

M531 : 3-hydroxy-3-methylglutarate

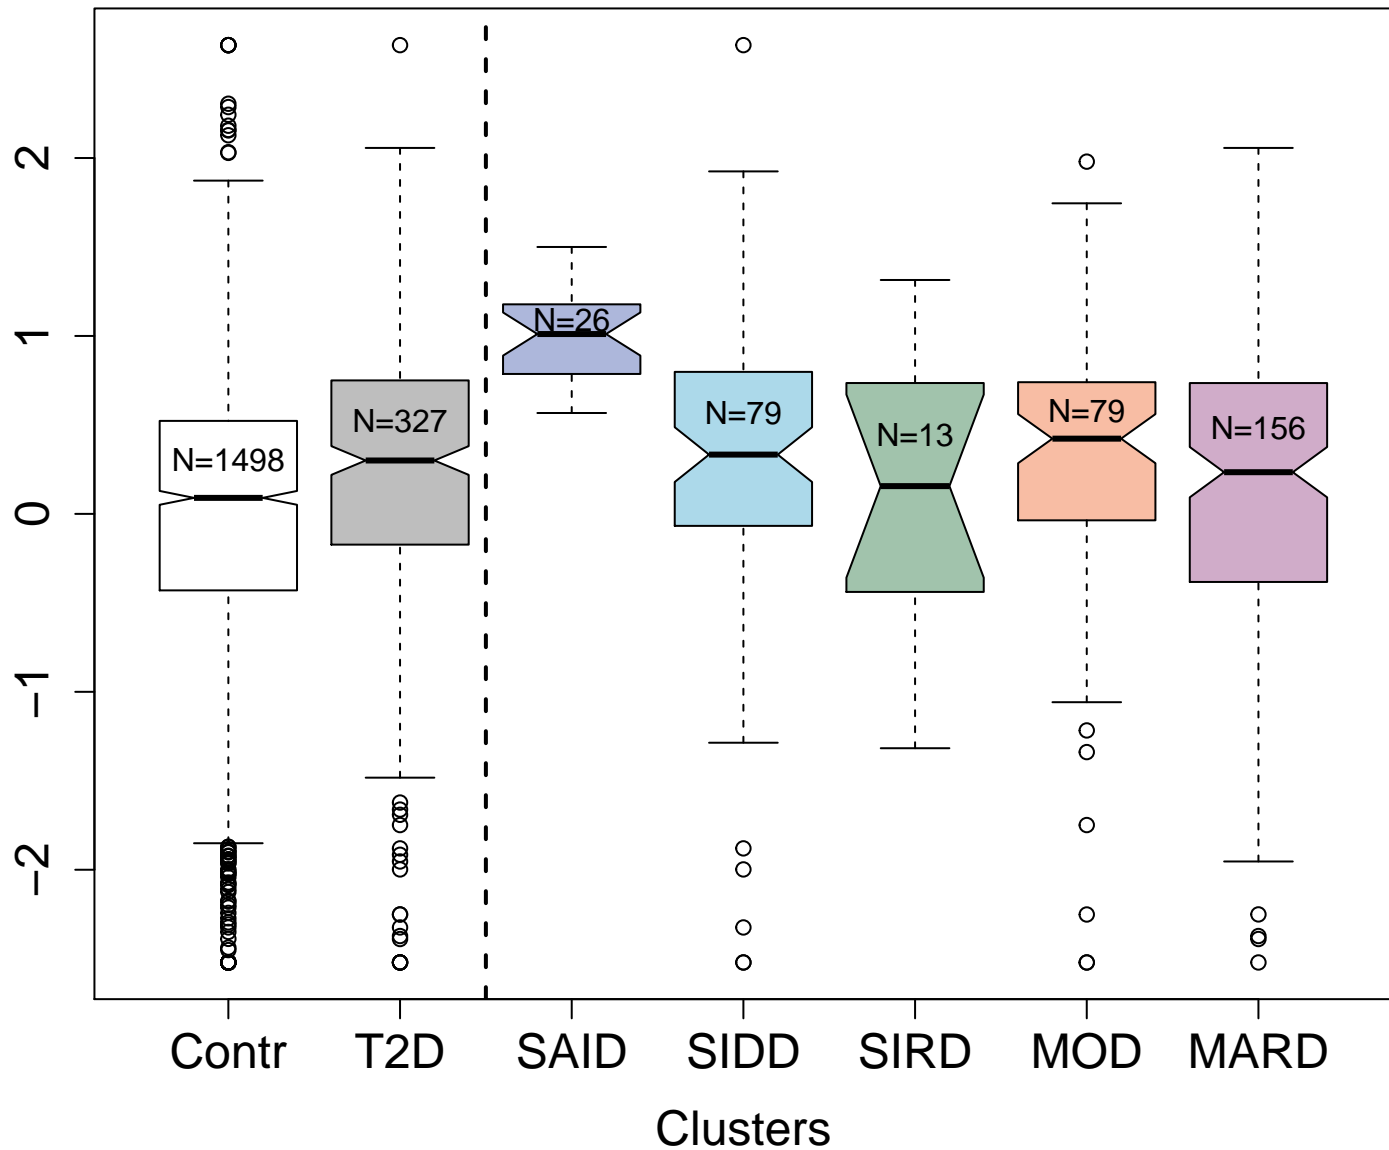

M52280 : X - 24241

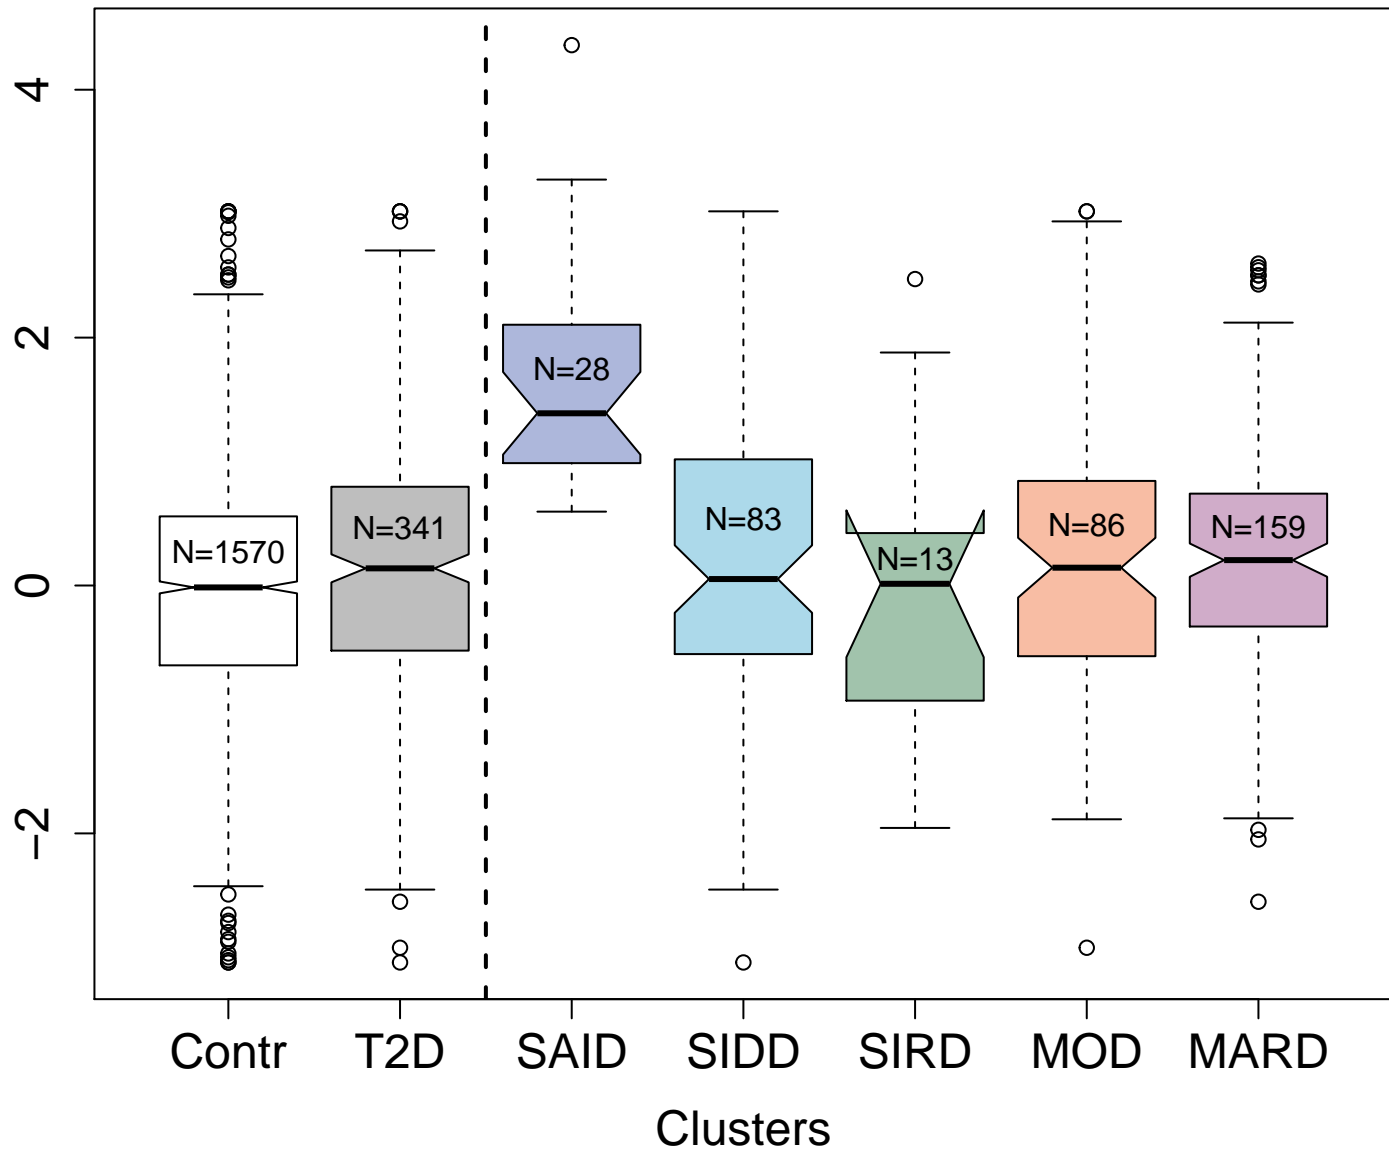

M46359 : X - 21315

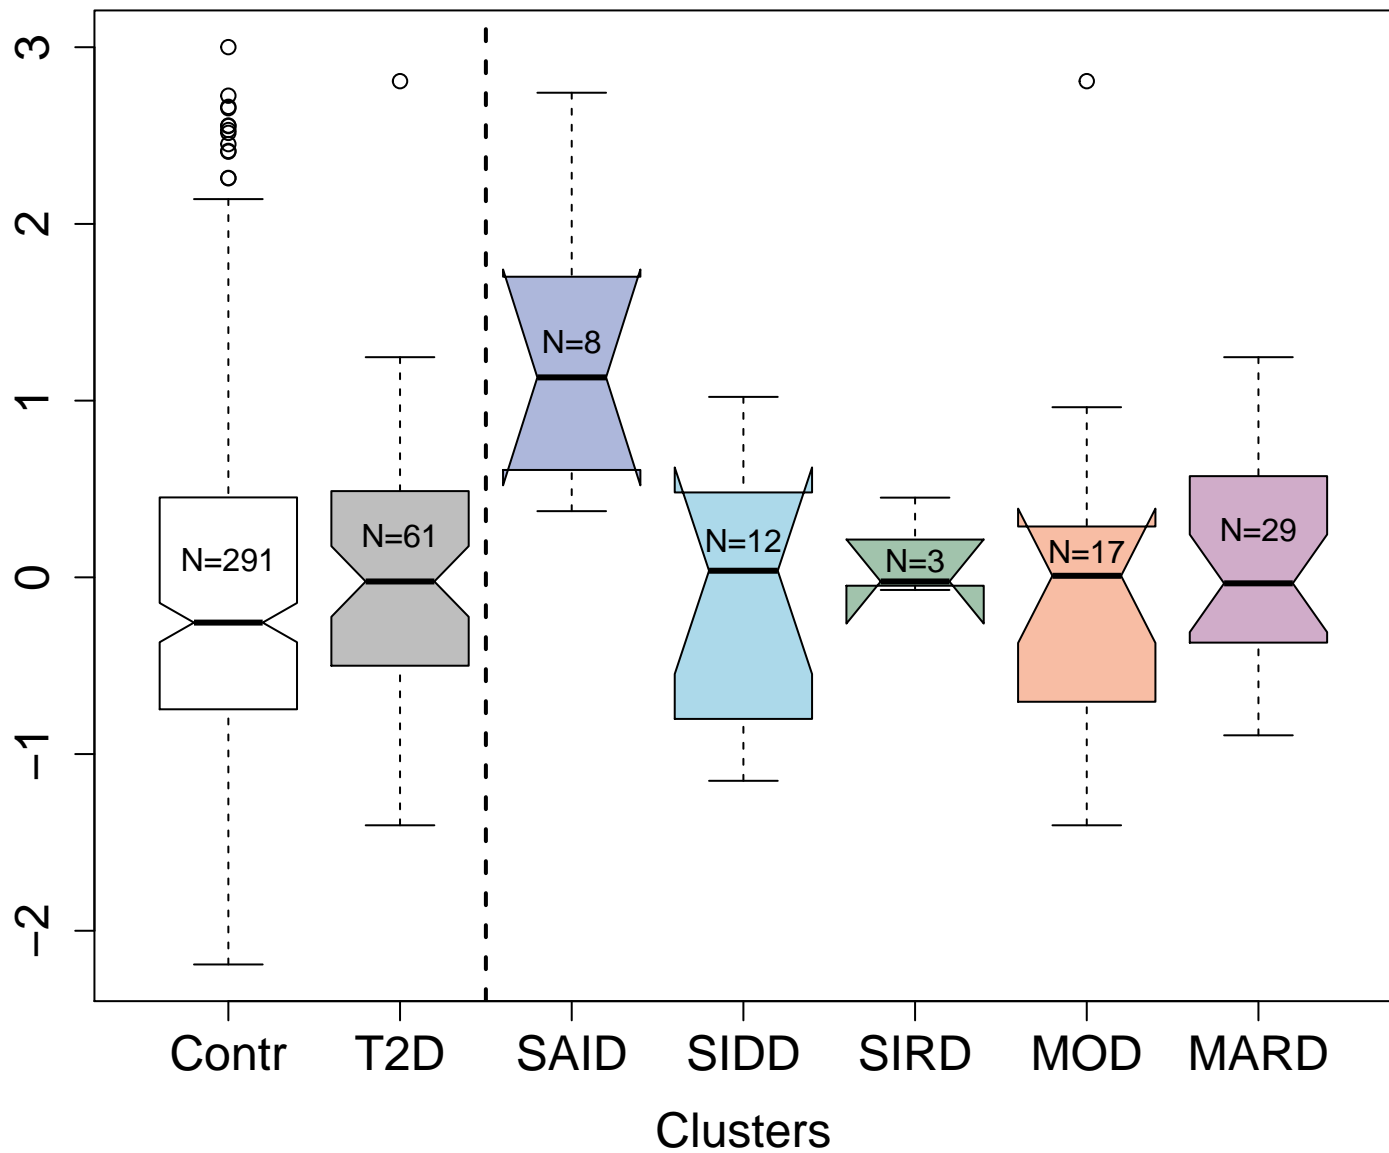

M62749 : X - 25433

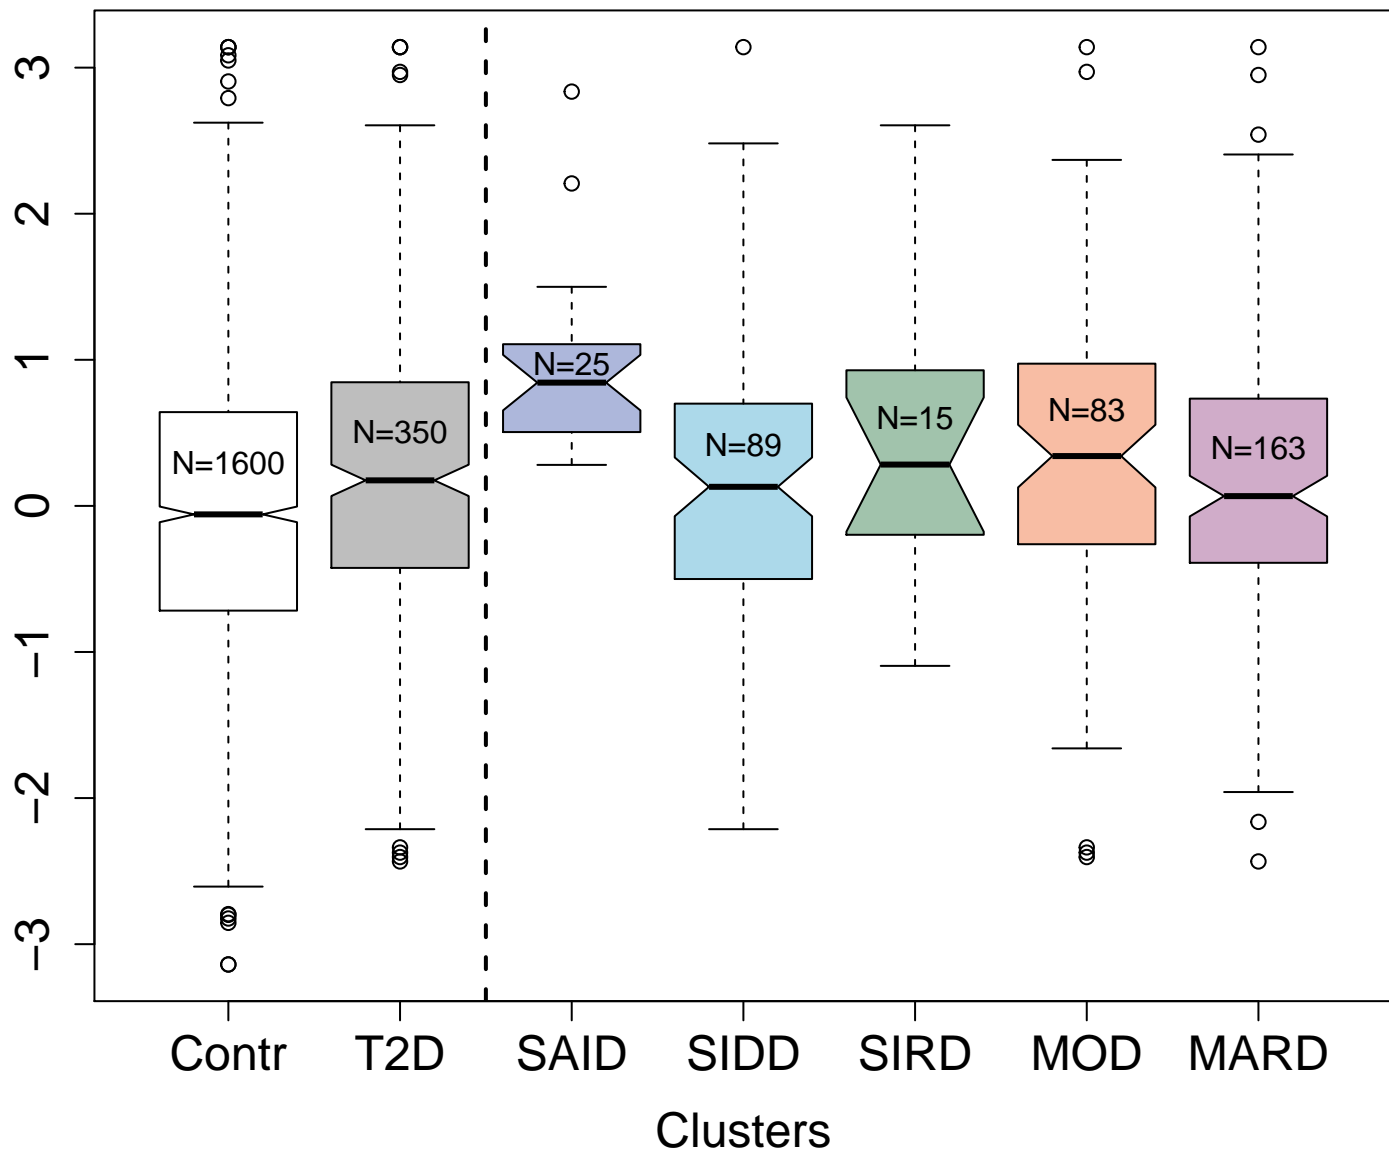

M1648 : serine

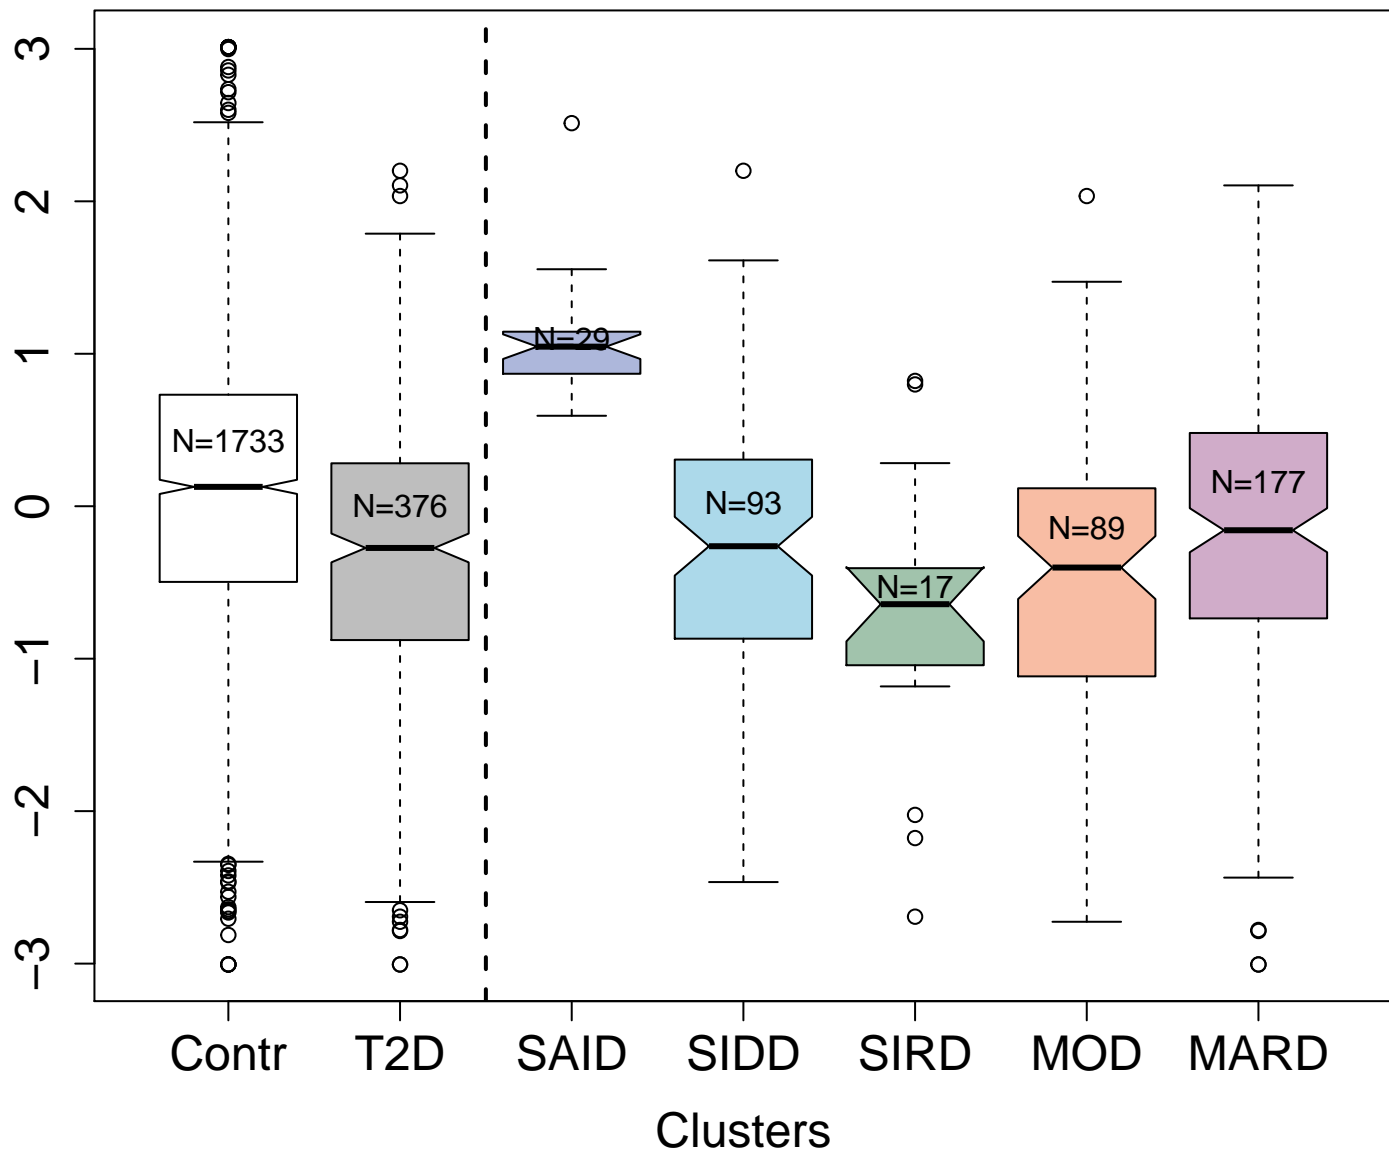



M47936 : X - 12726

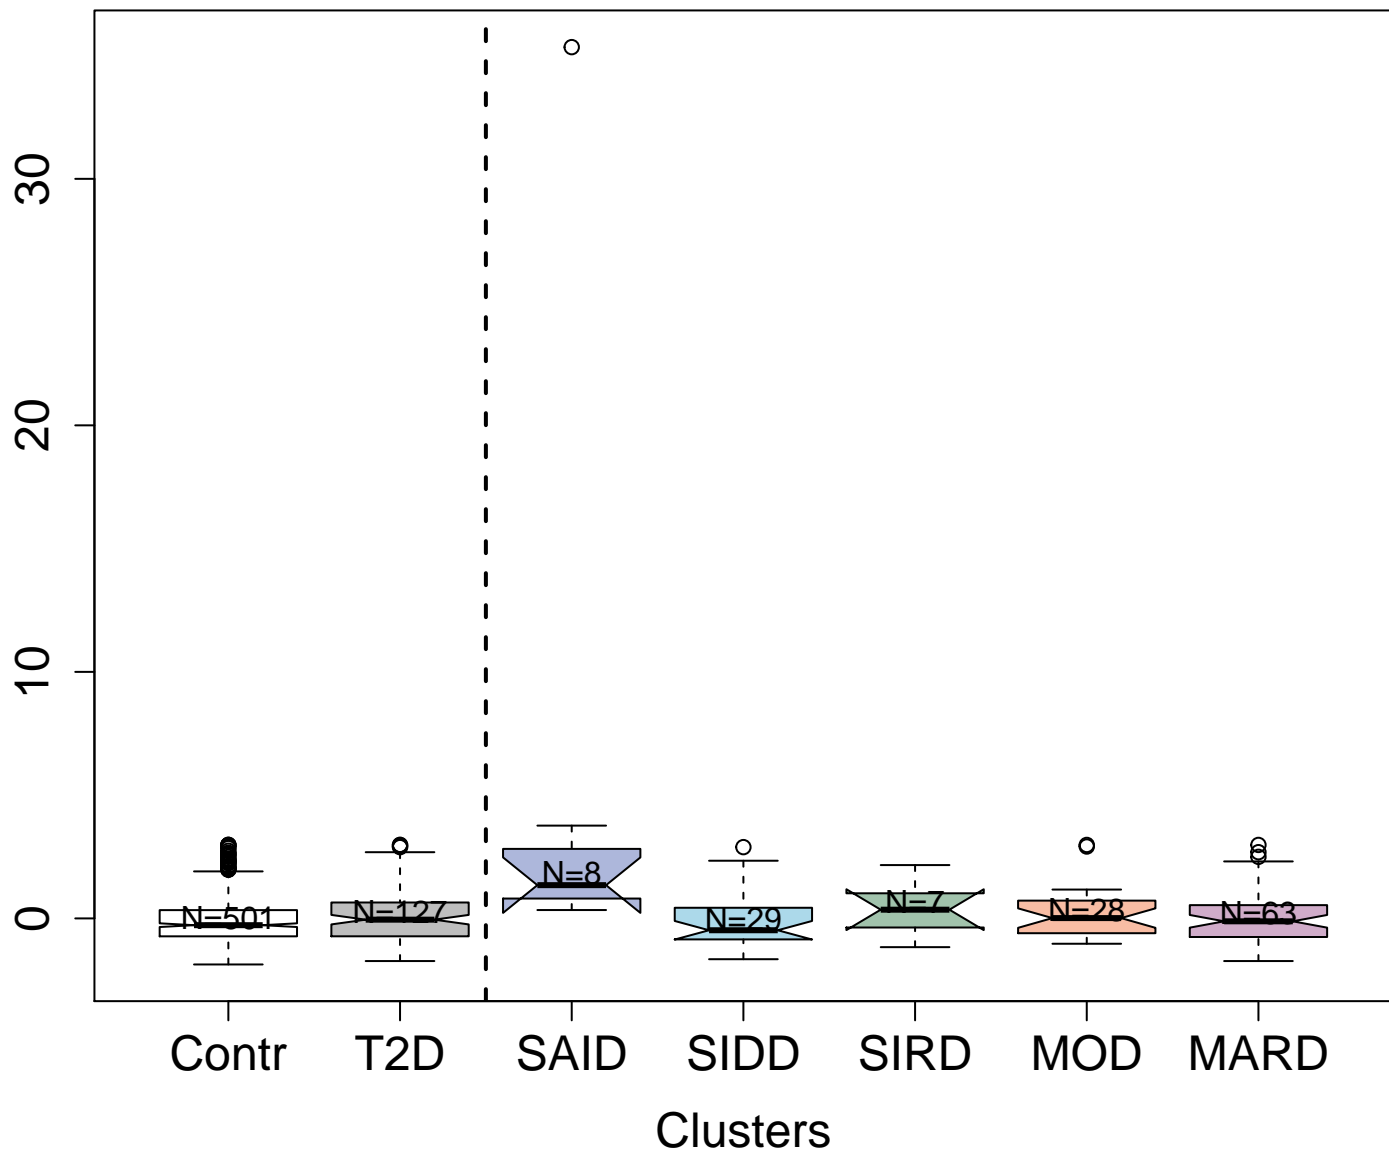

M46639 : X - 12851

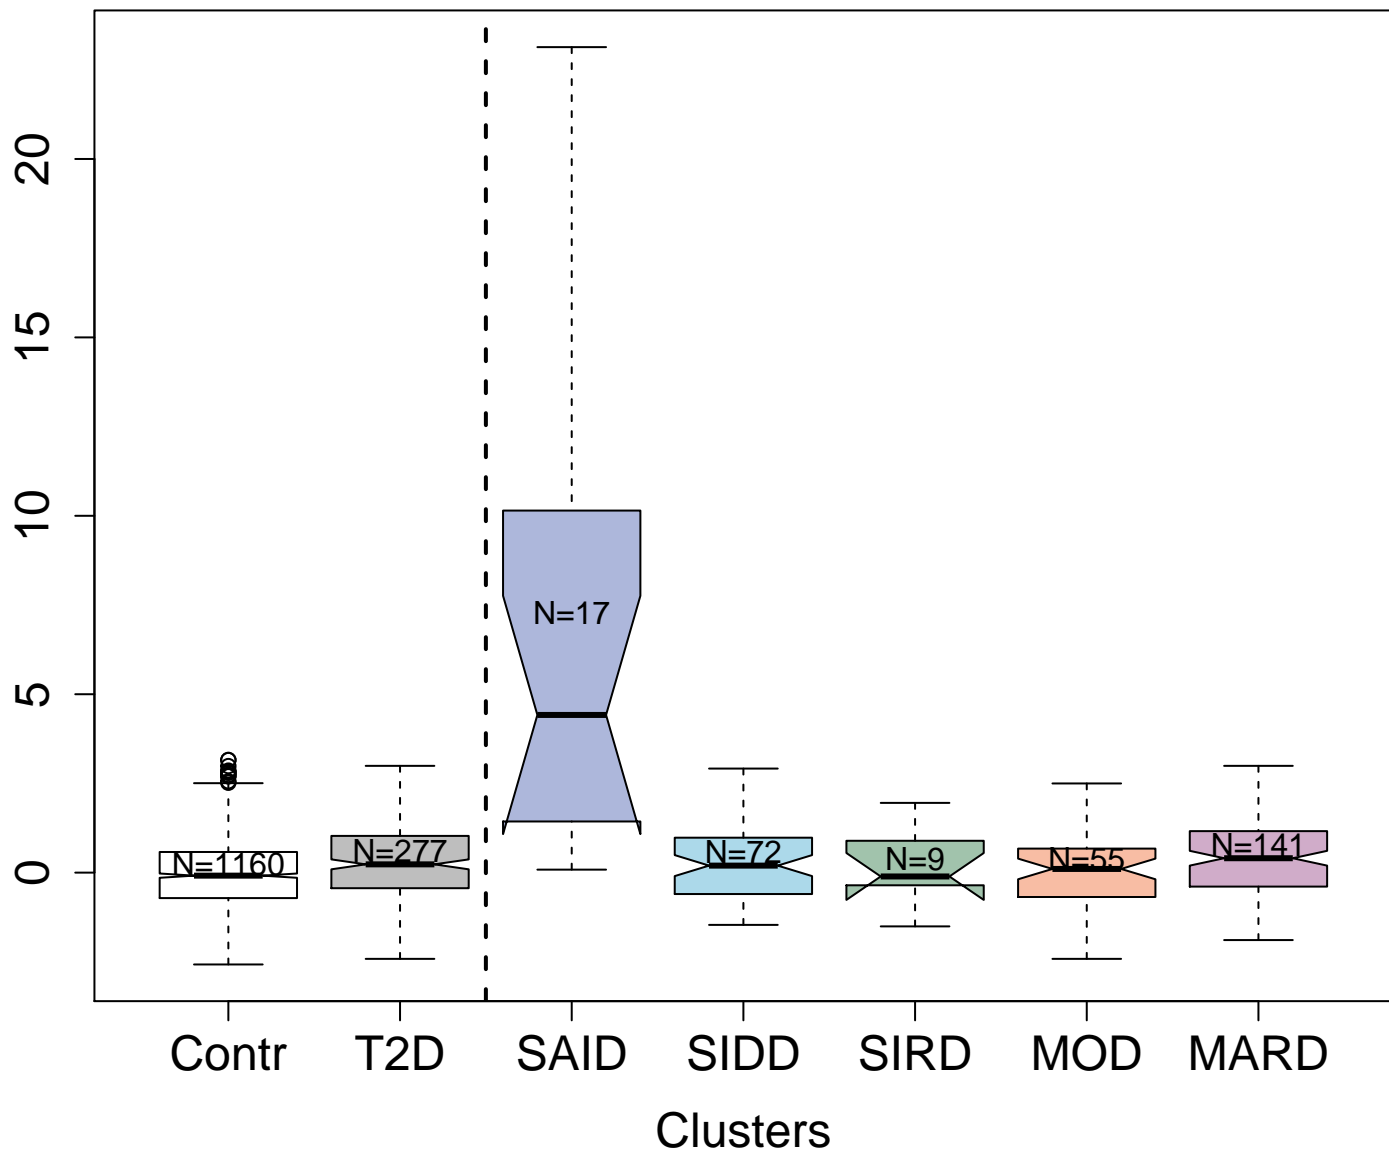

M46636 : X - 12849

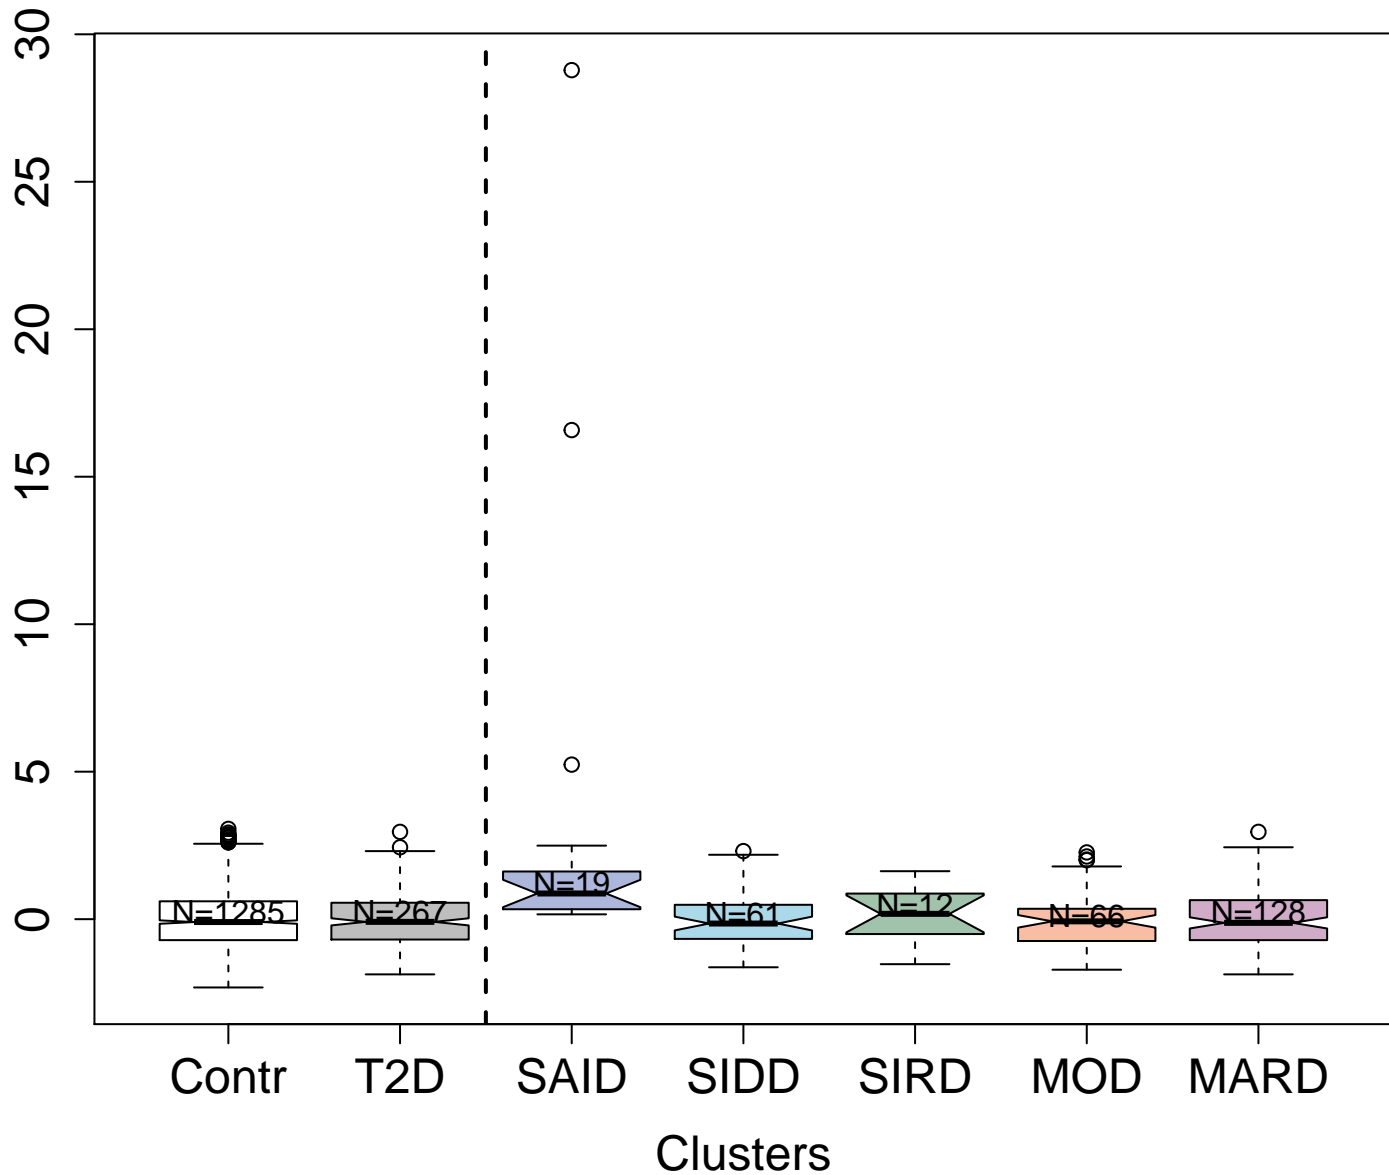

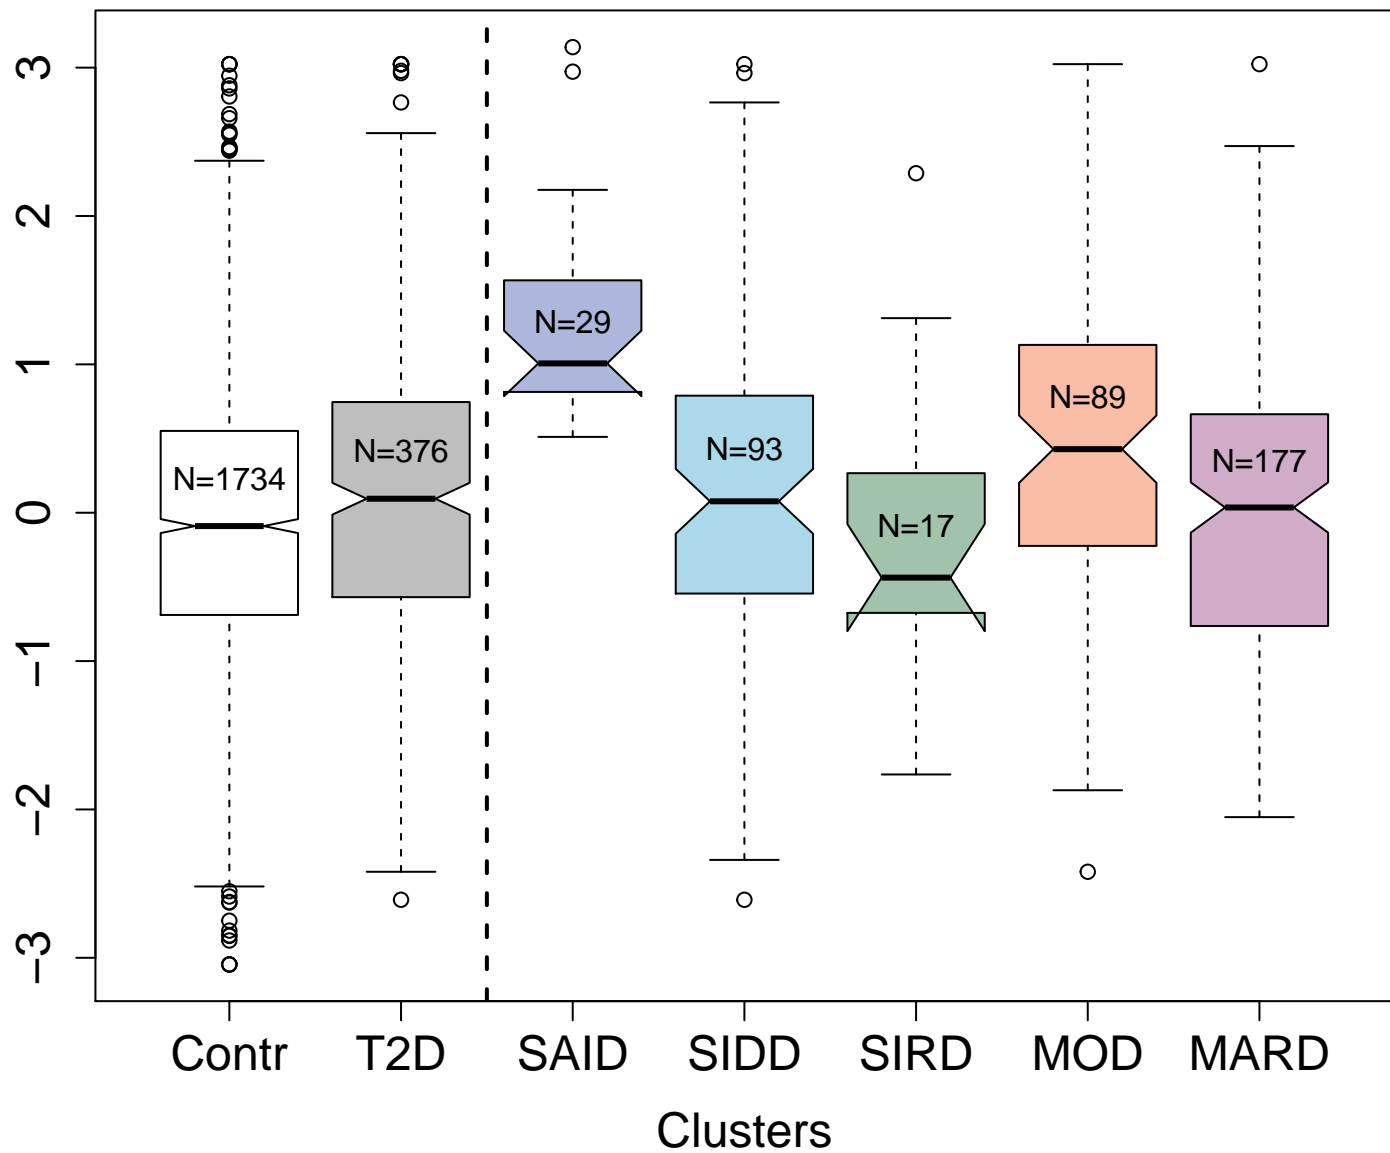

M43493 : formiminoglutamate

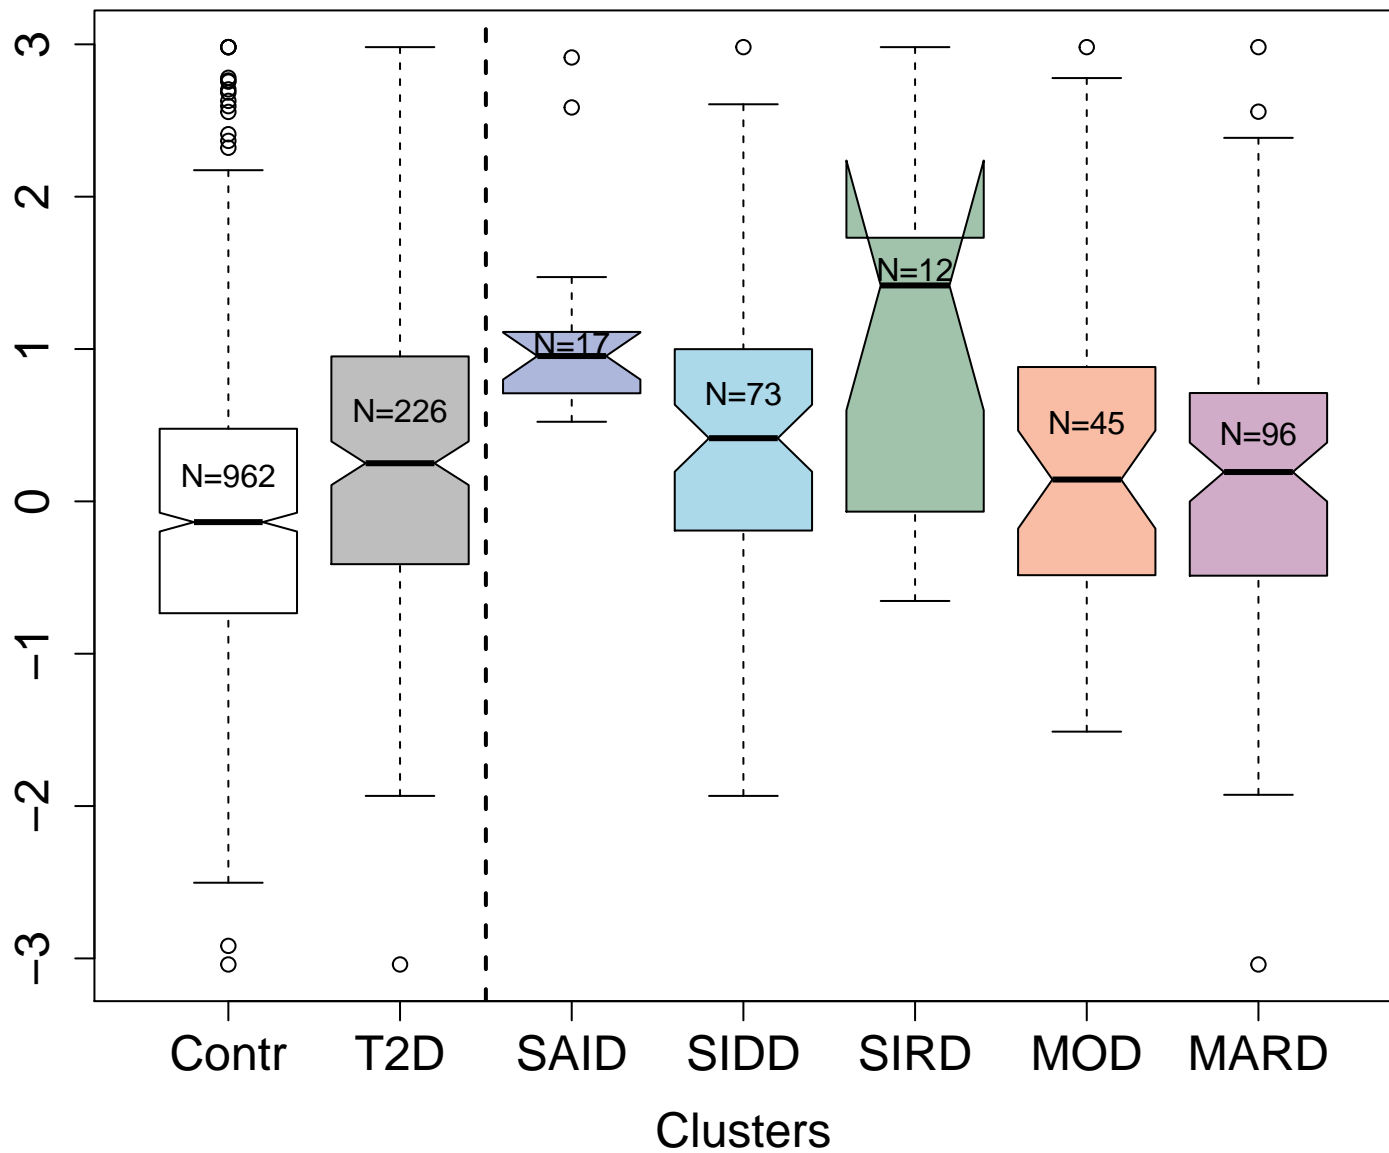

M47155 : glycerophosphoinositol\*

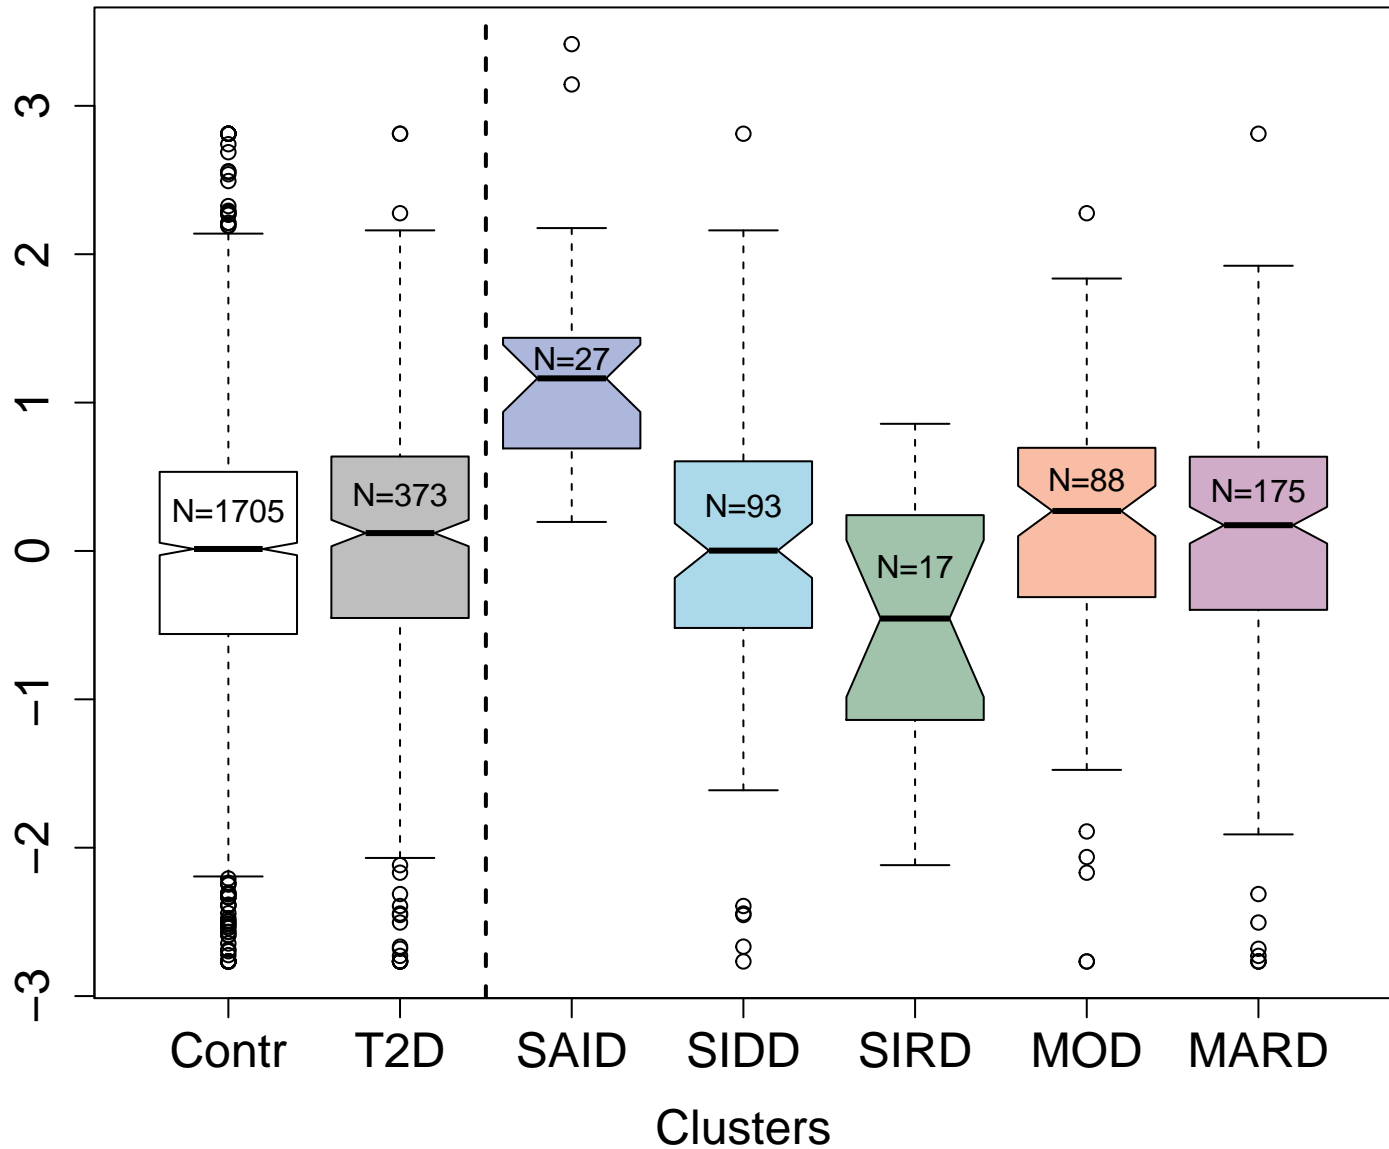

M33384 : salicylic glucuronide\*

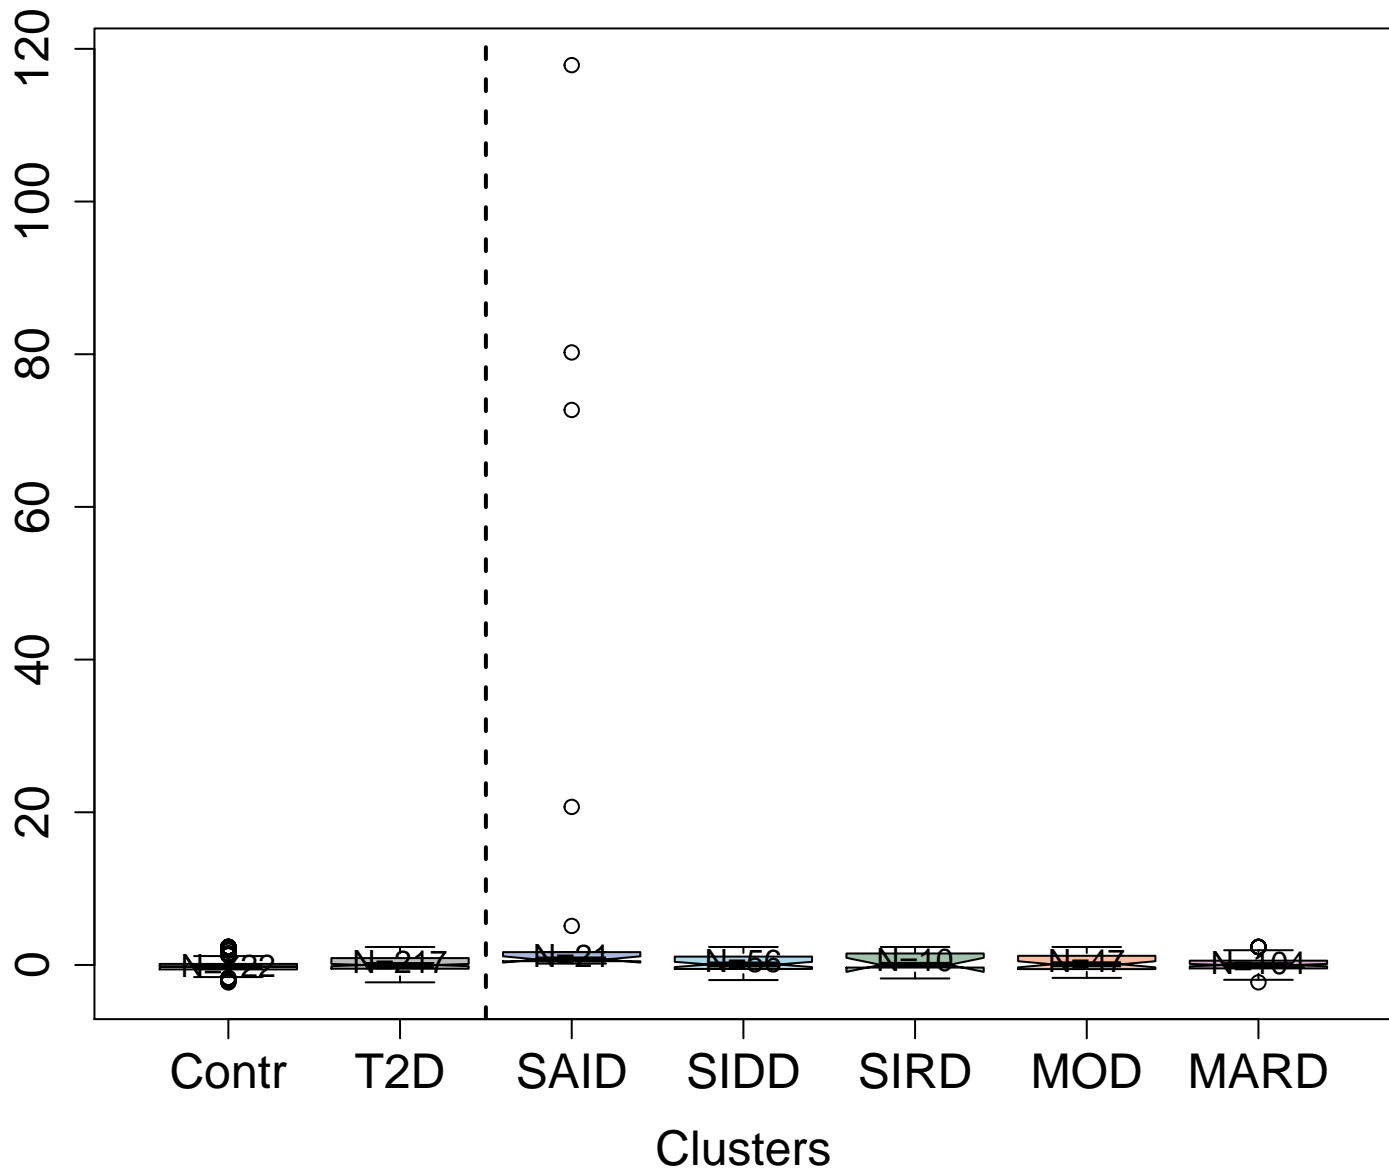

M15677 : 3-methylhistidine

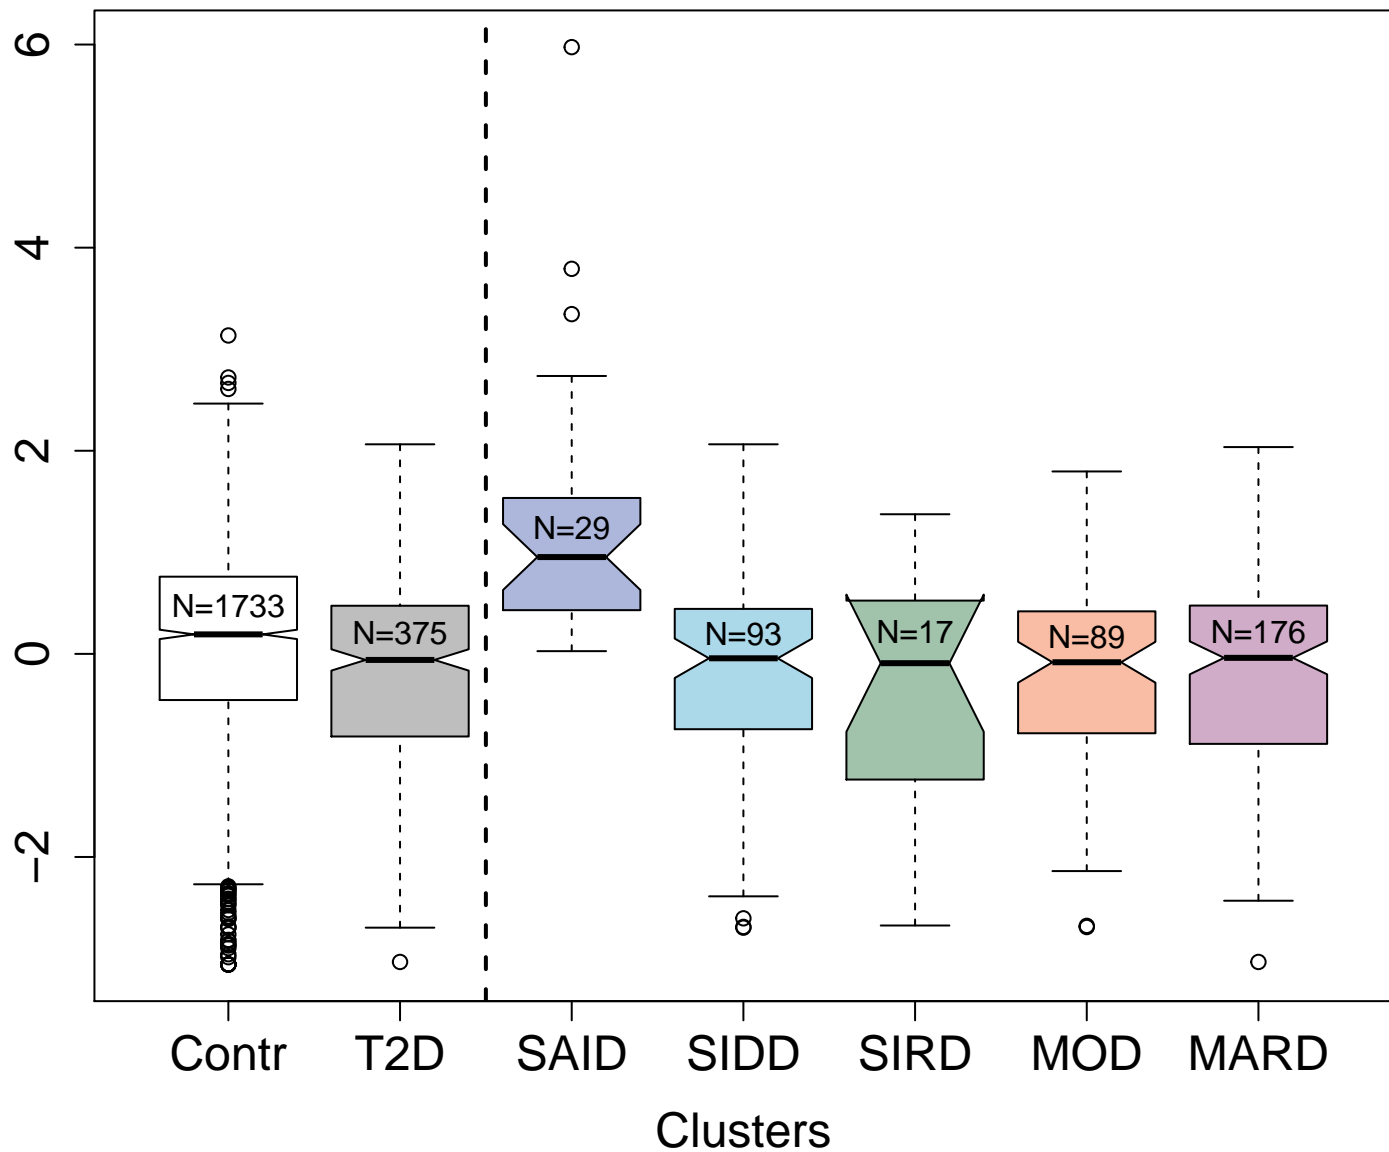



M34419 : 1-linoleoyl-GPC (18:2)

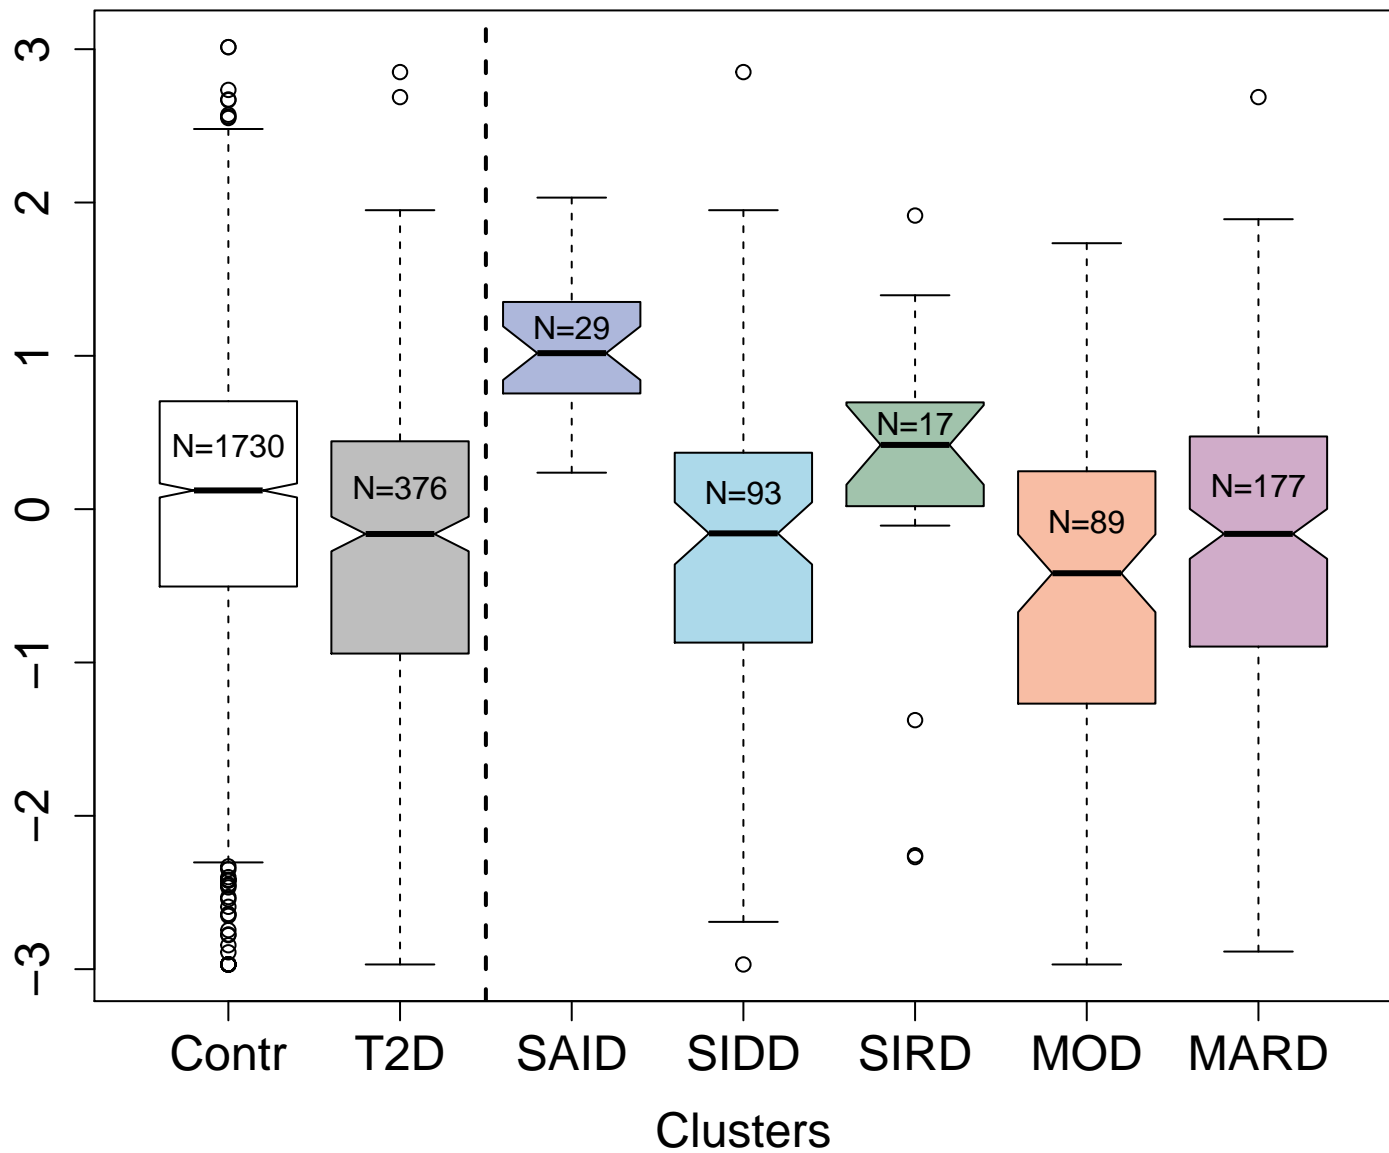

M37253 : 2-hydroxyglutarate

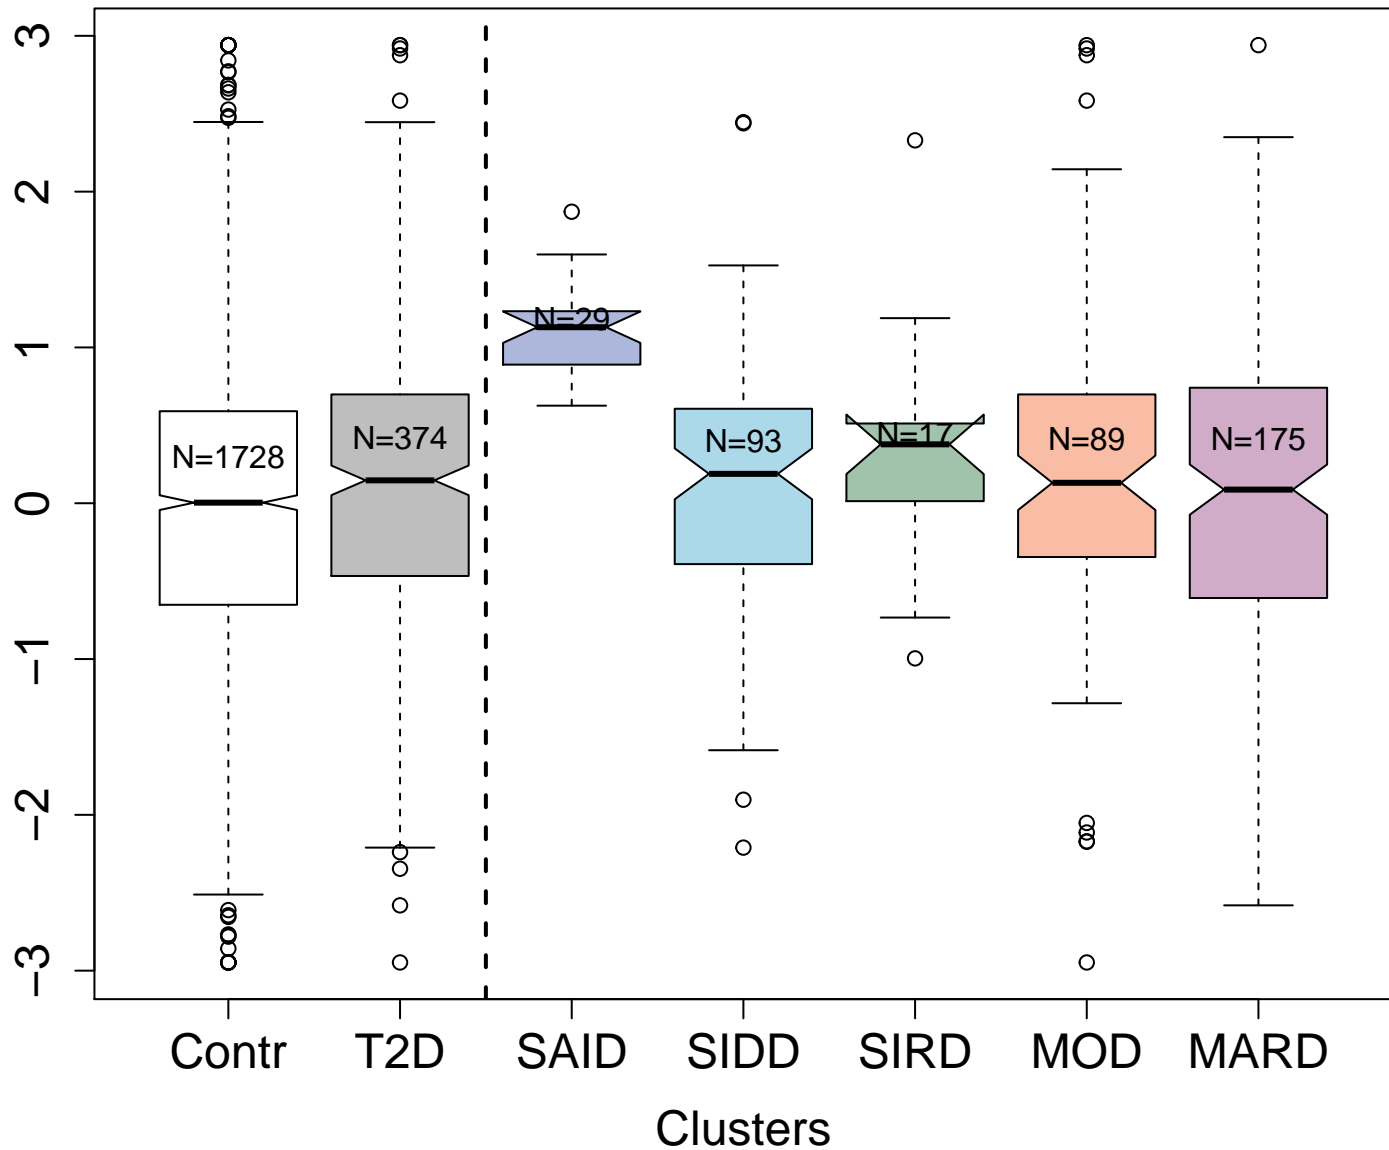

§15 : branched-chain, straight-chain, or cyclopropyl 10:1 fatty a

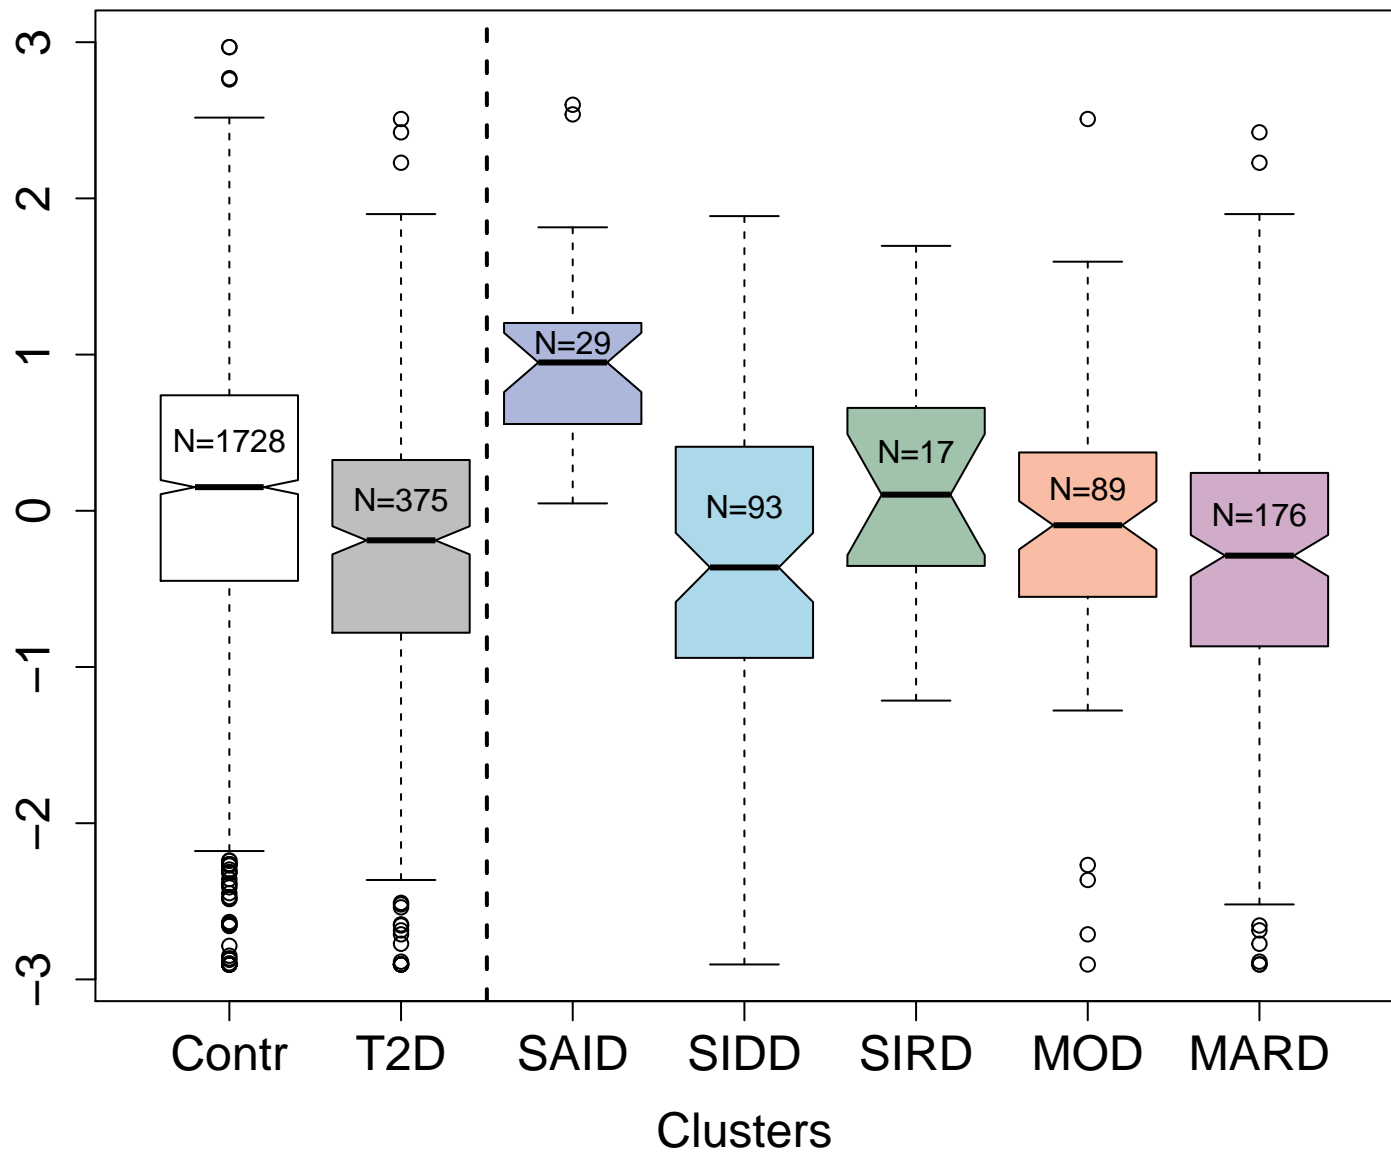

M47671: X - 18921

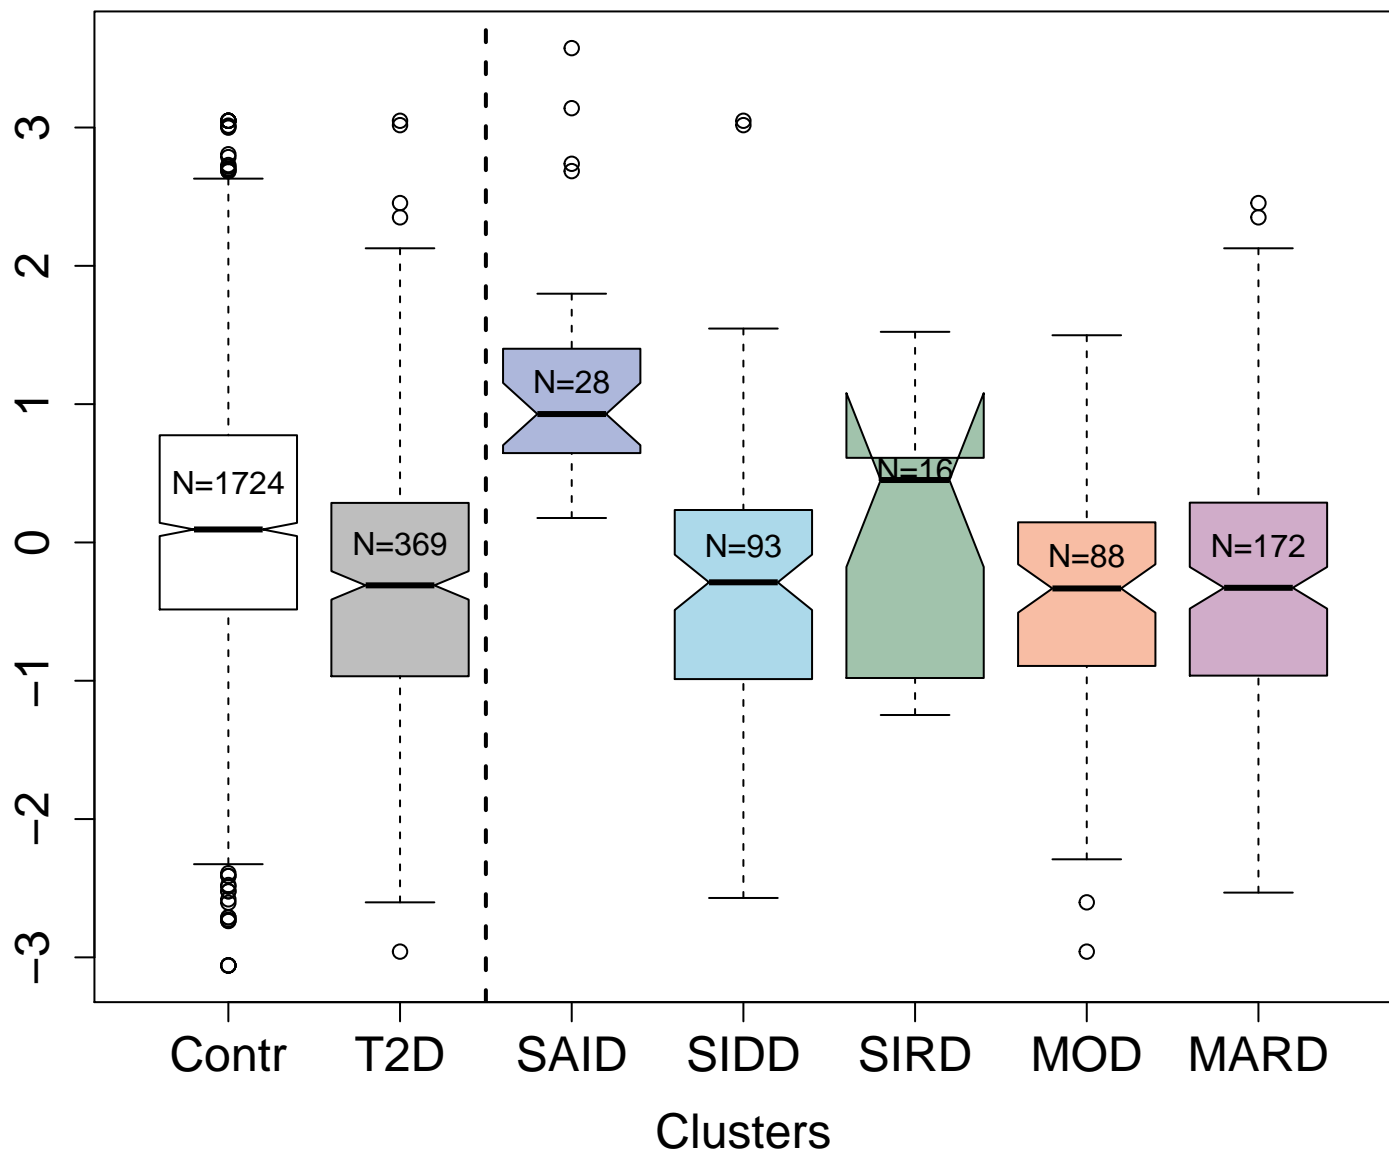

M43530 : N-acetyl-cadaverine

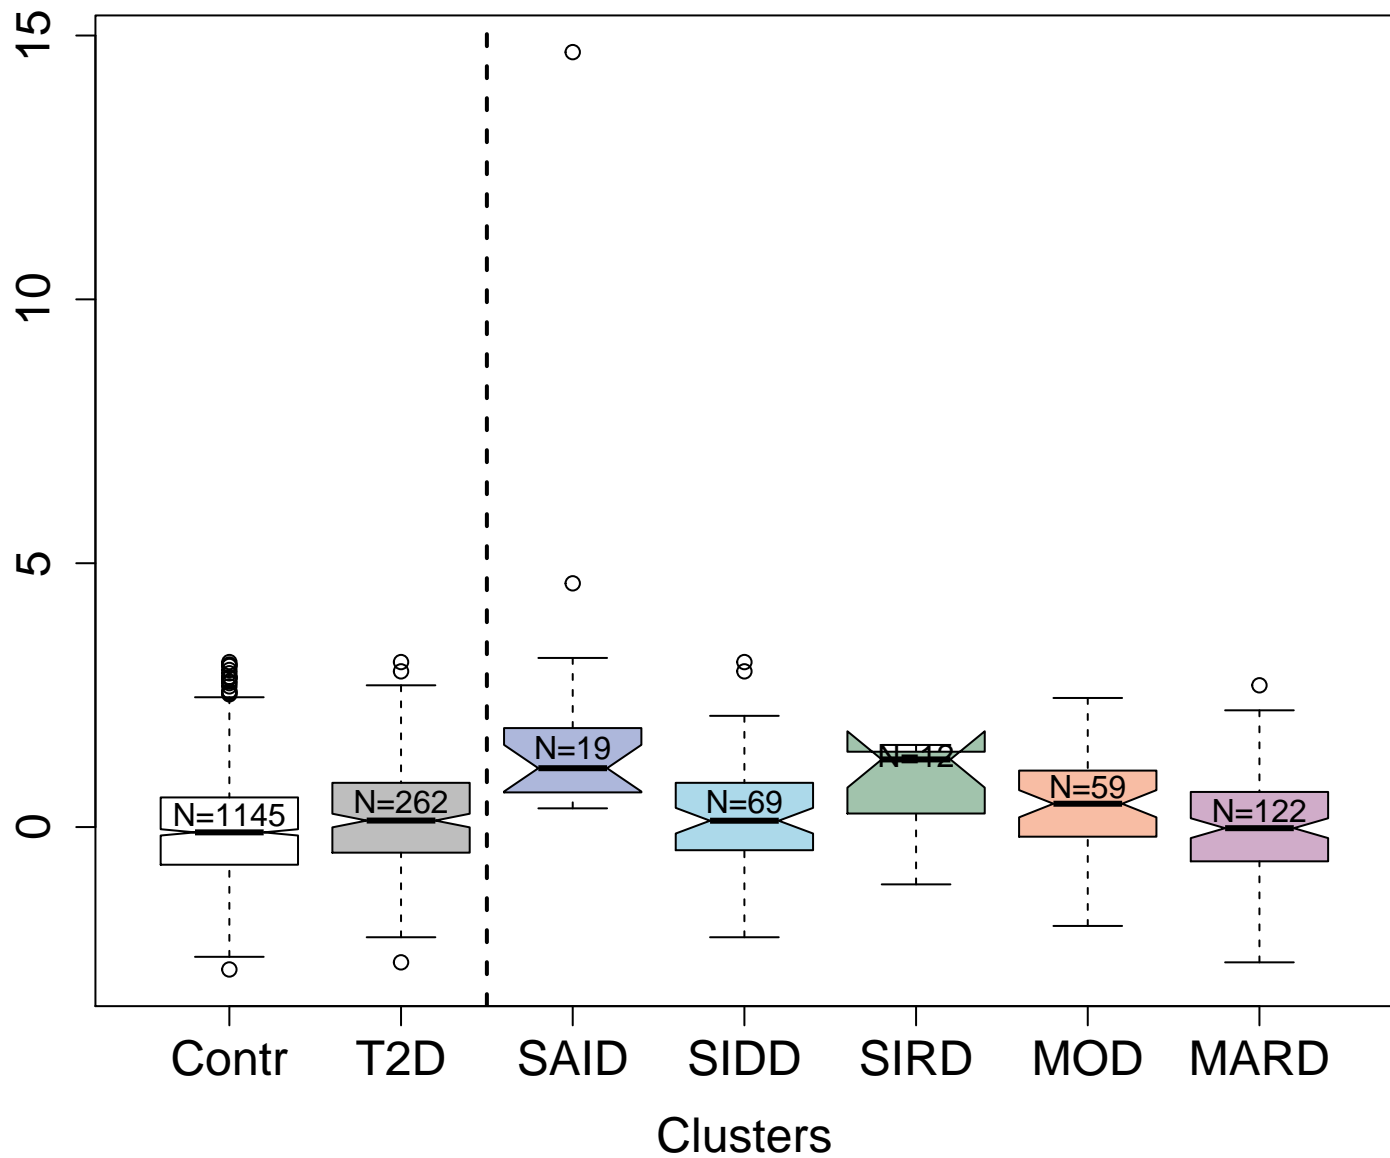

M46172 : 5alpha-pregnan-3,20-diol disulfate

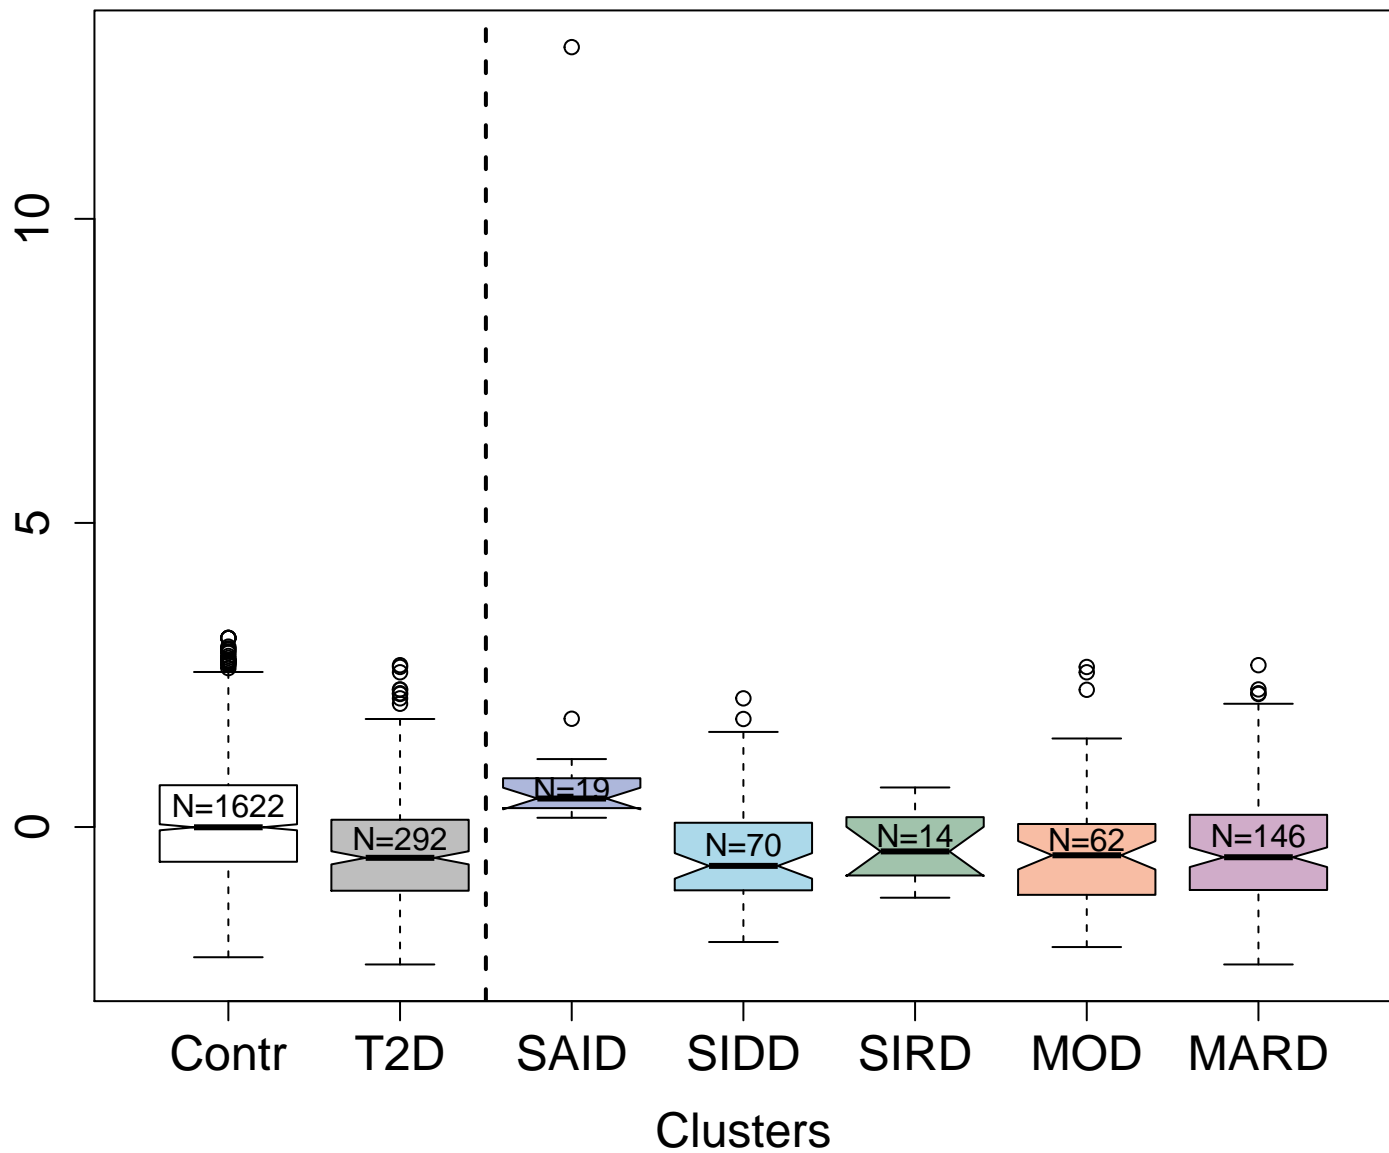

M32506 : 2-linoleoylglycerol (18:2)

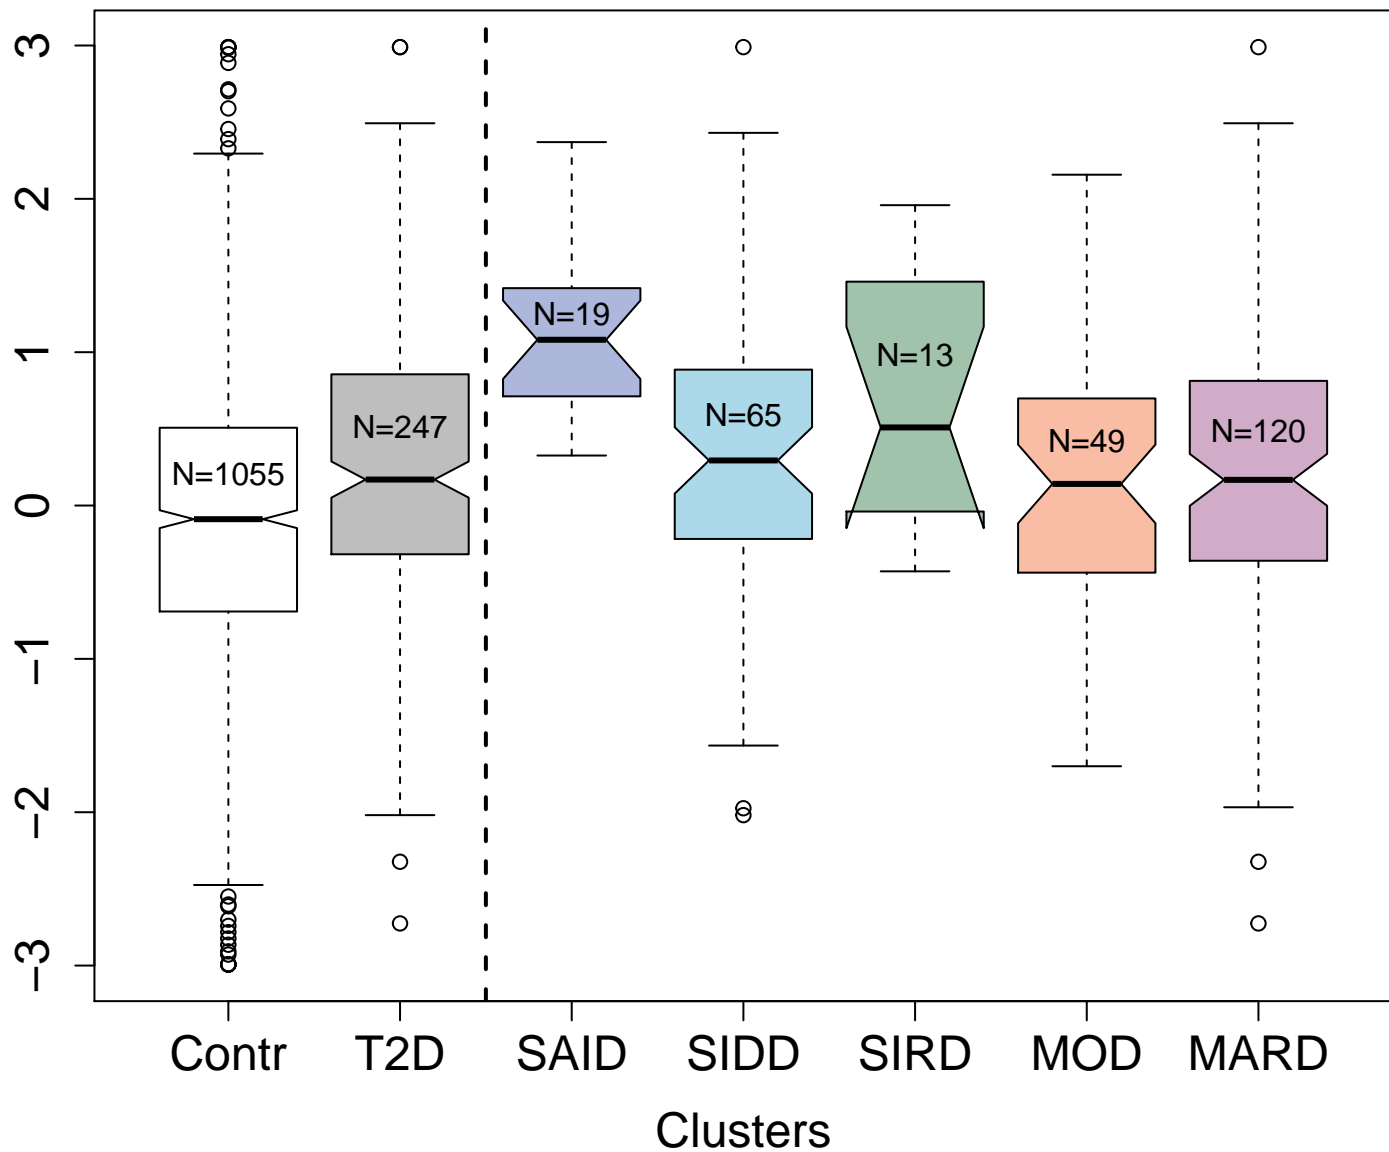

M63687 : ascorbic acid 3-sulfate\*

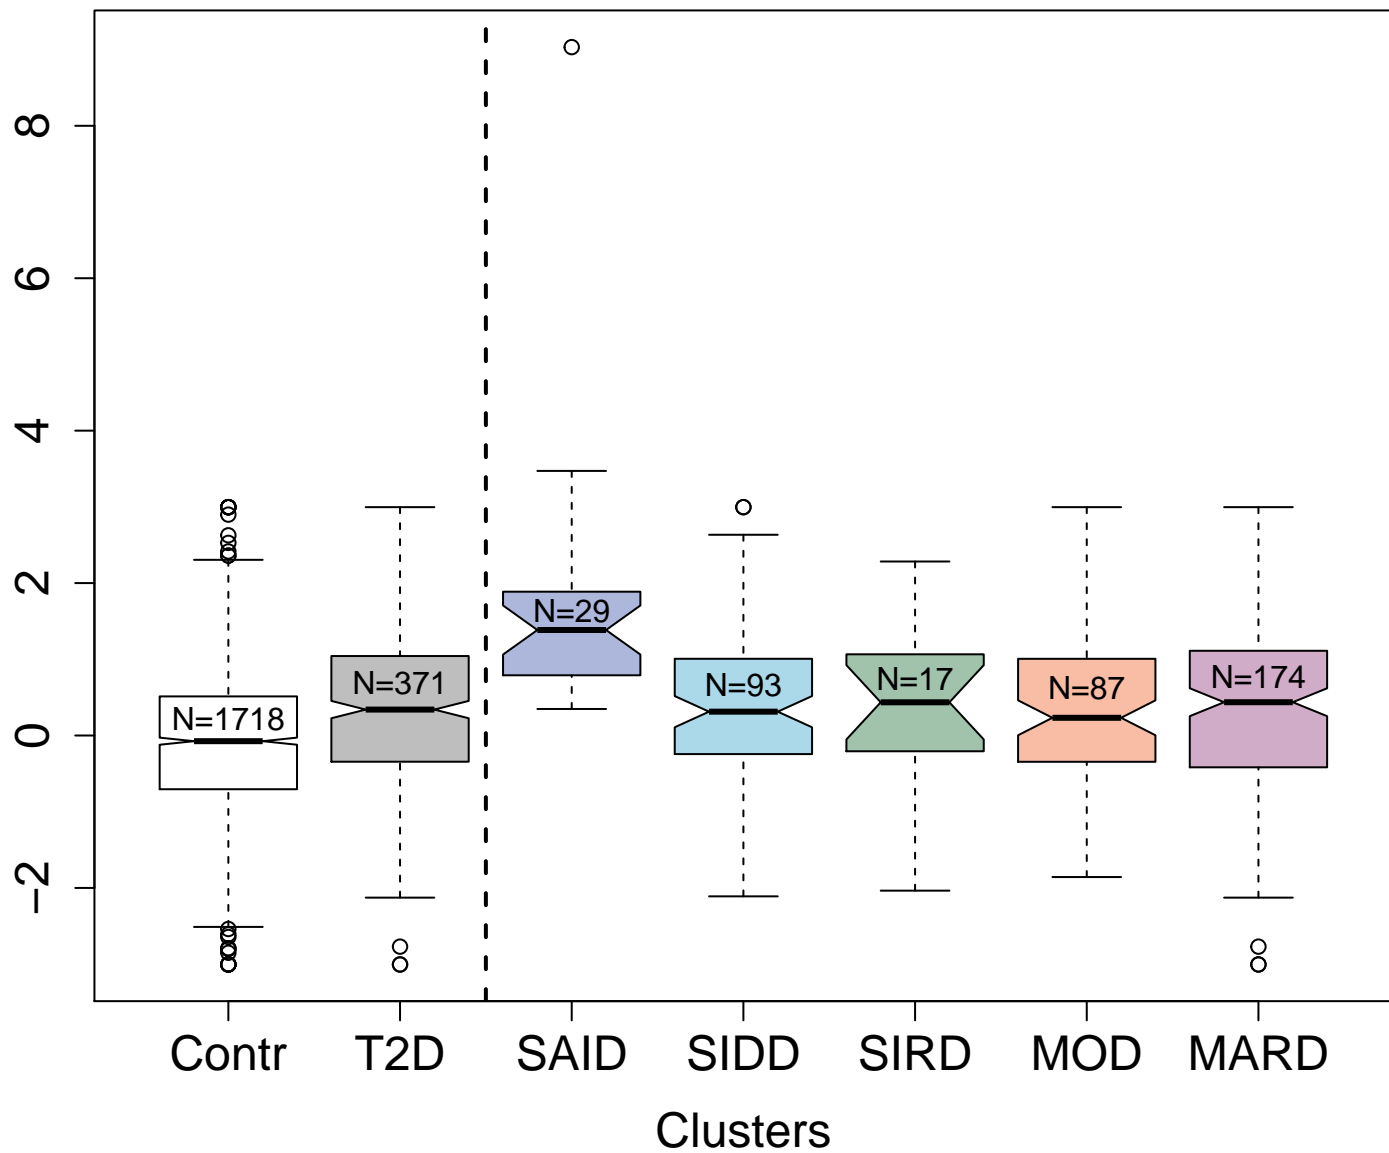



M32401 : trigonelline (N'-methylnicotinate)

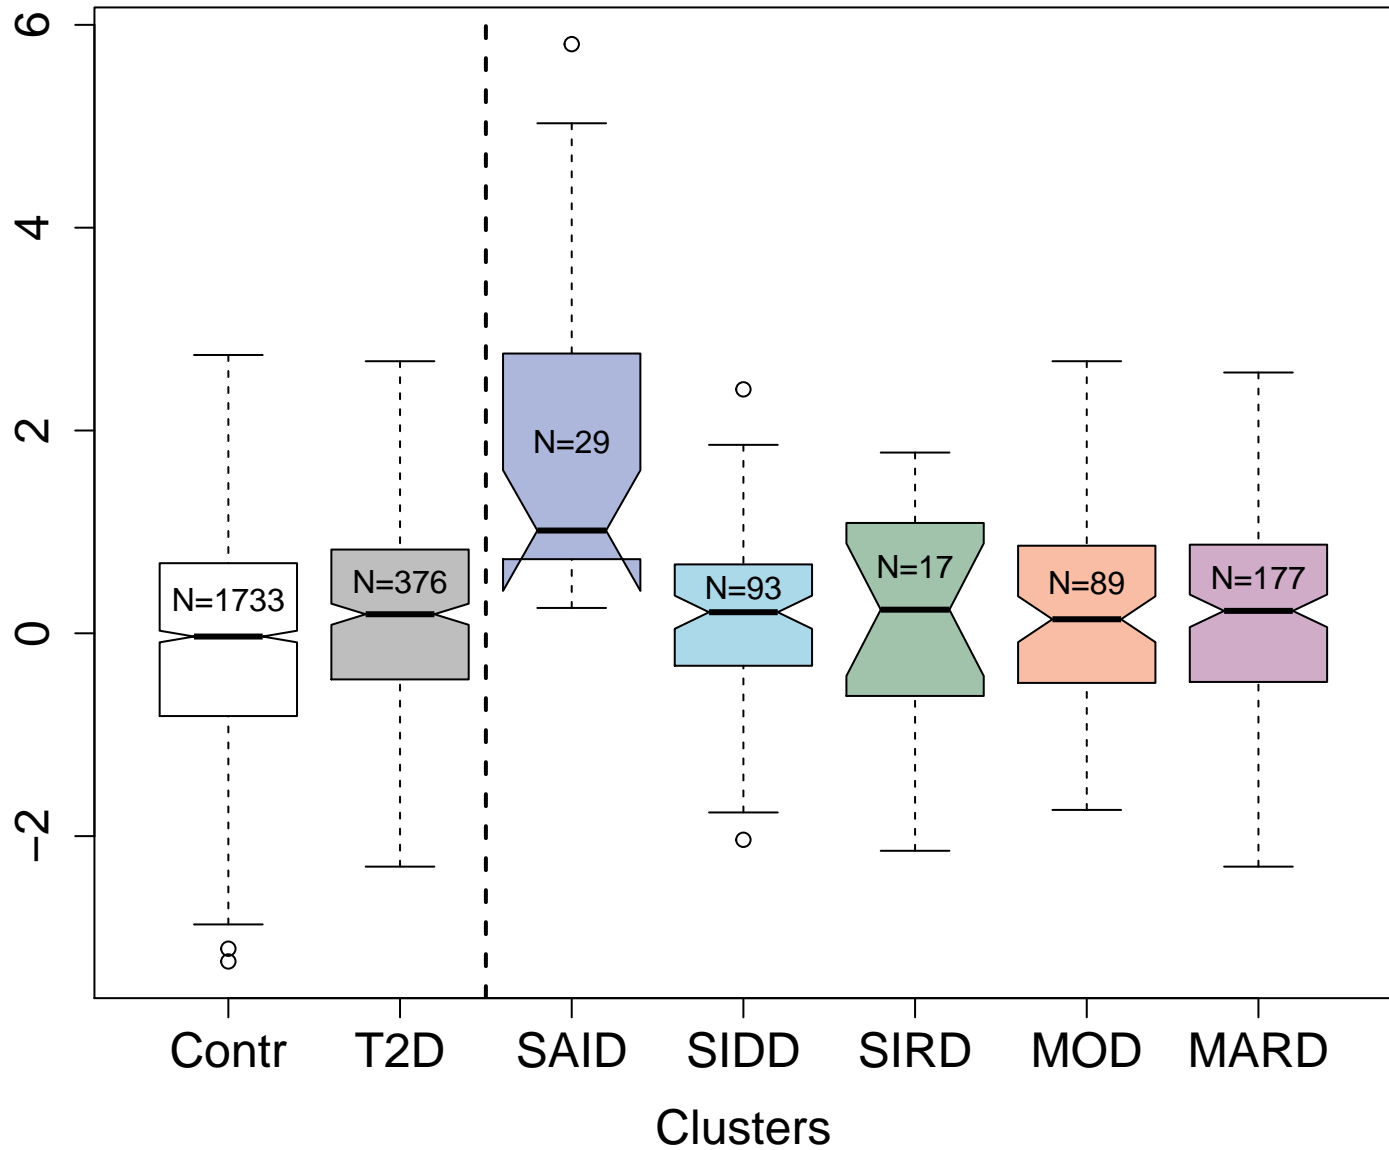

M52615 : sphingomyelin (d18:1/17:0, d18:1/18:0, d17:1/18:0, d19:1/16:0)

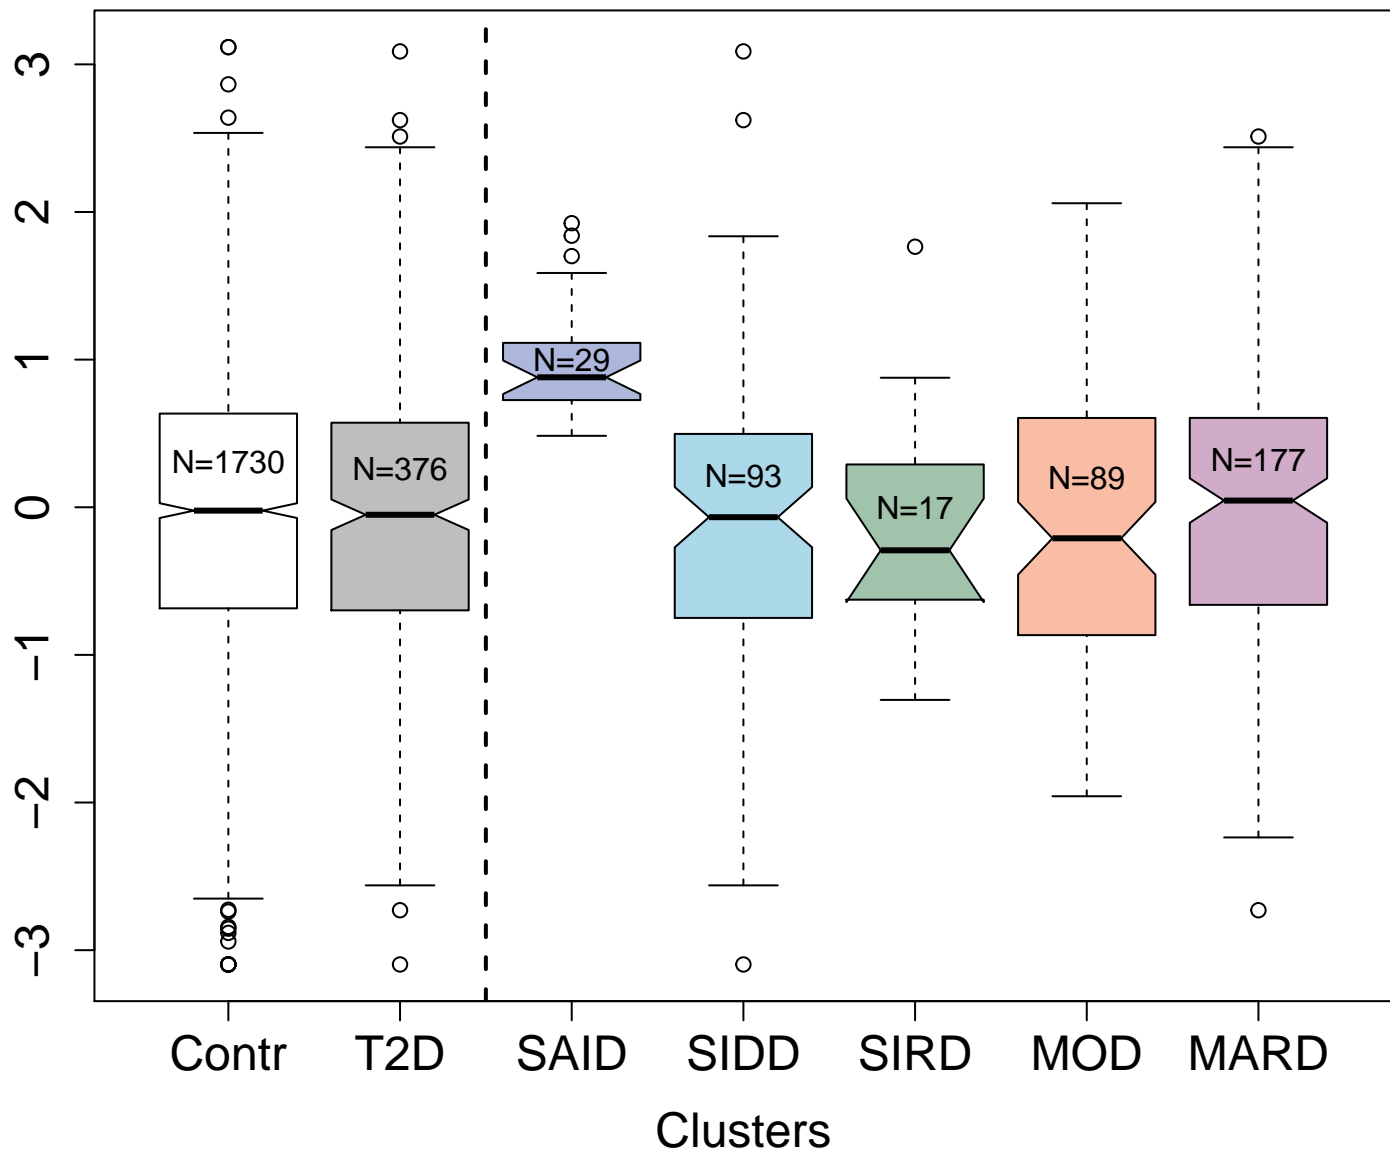

52689 : 1-(1-enyl-palmitoyl)-2-arachidonoyl-GPC (P-16:0/20

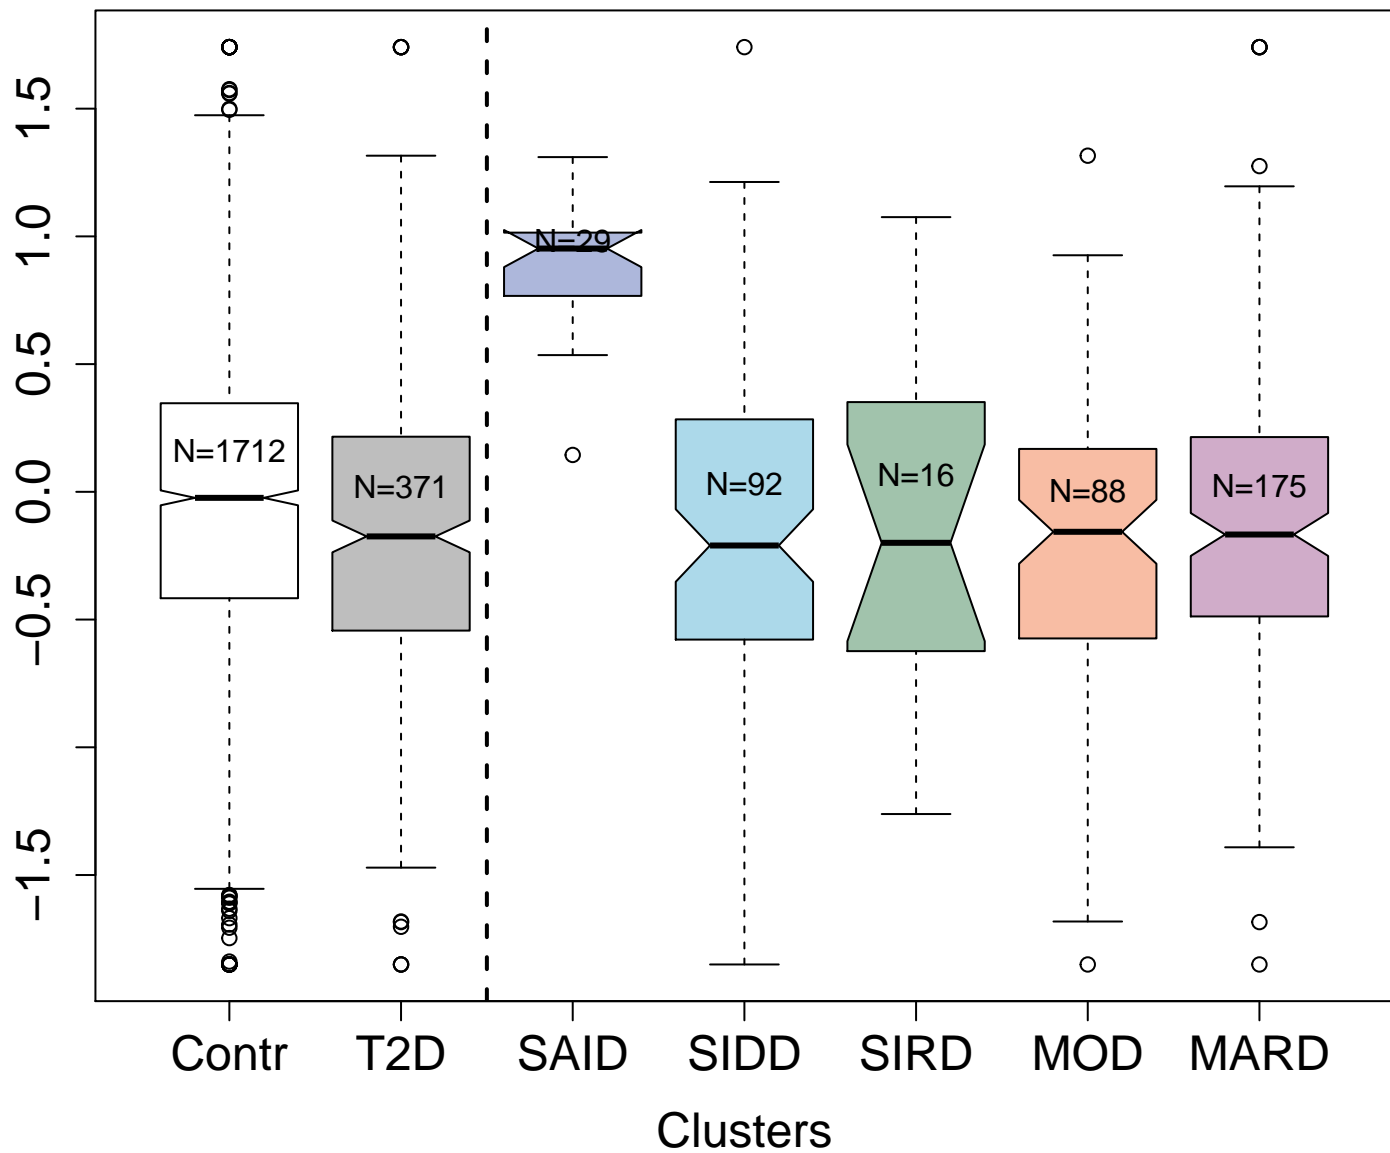

M46977 : X - 15503

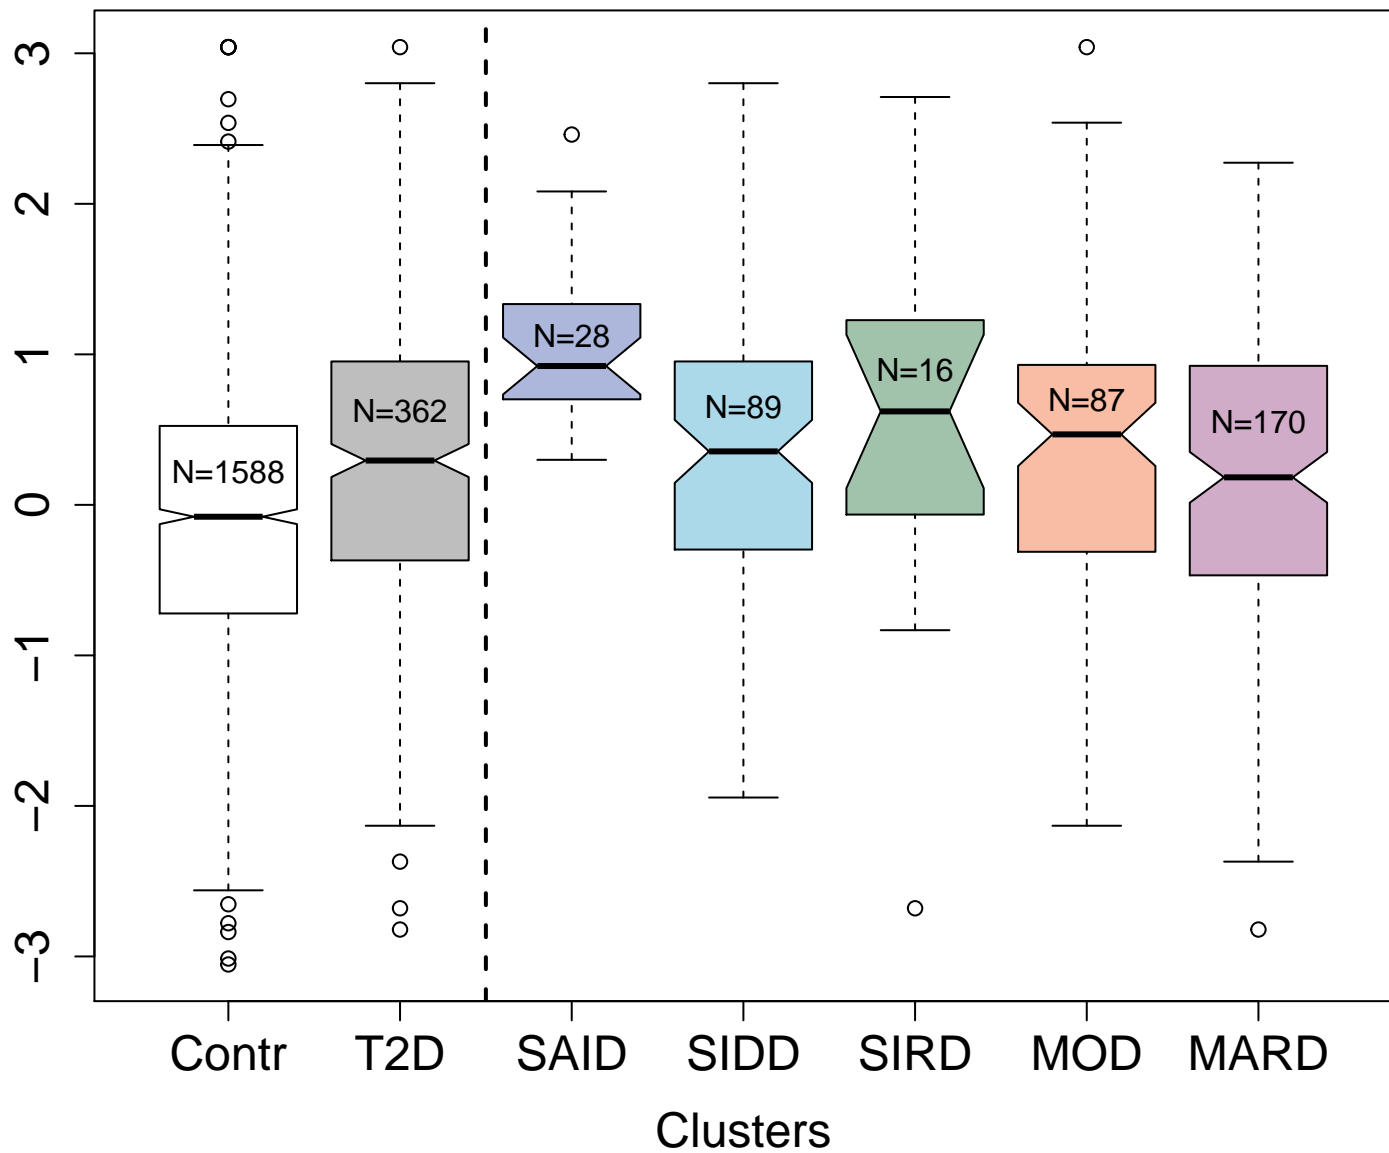

M40730 : imidazole propionate

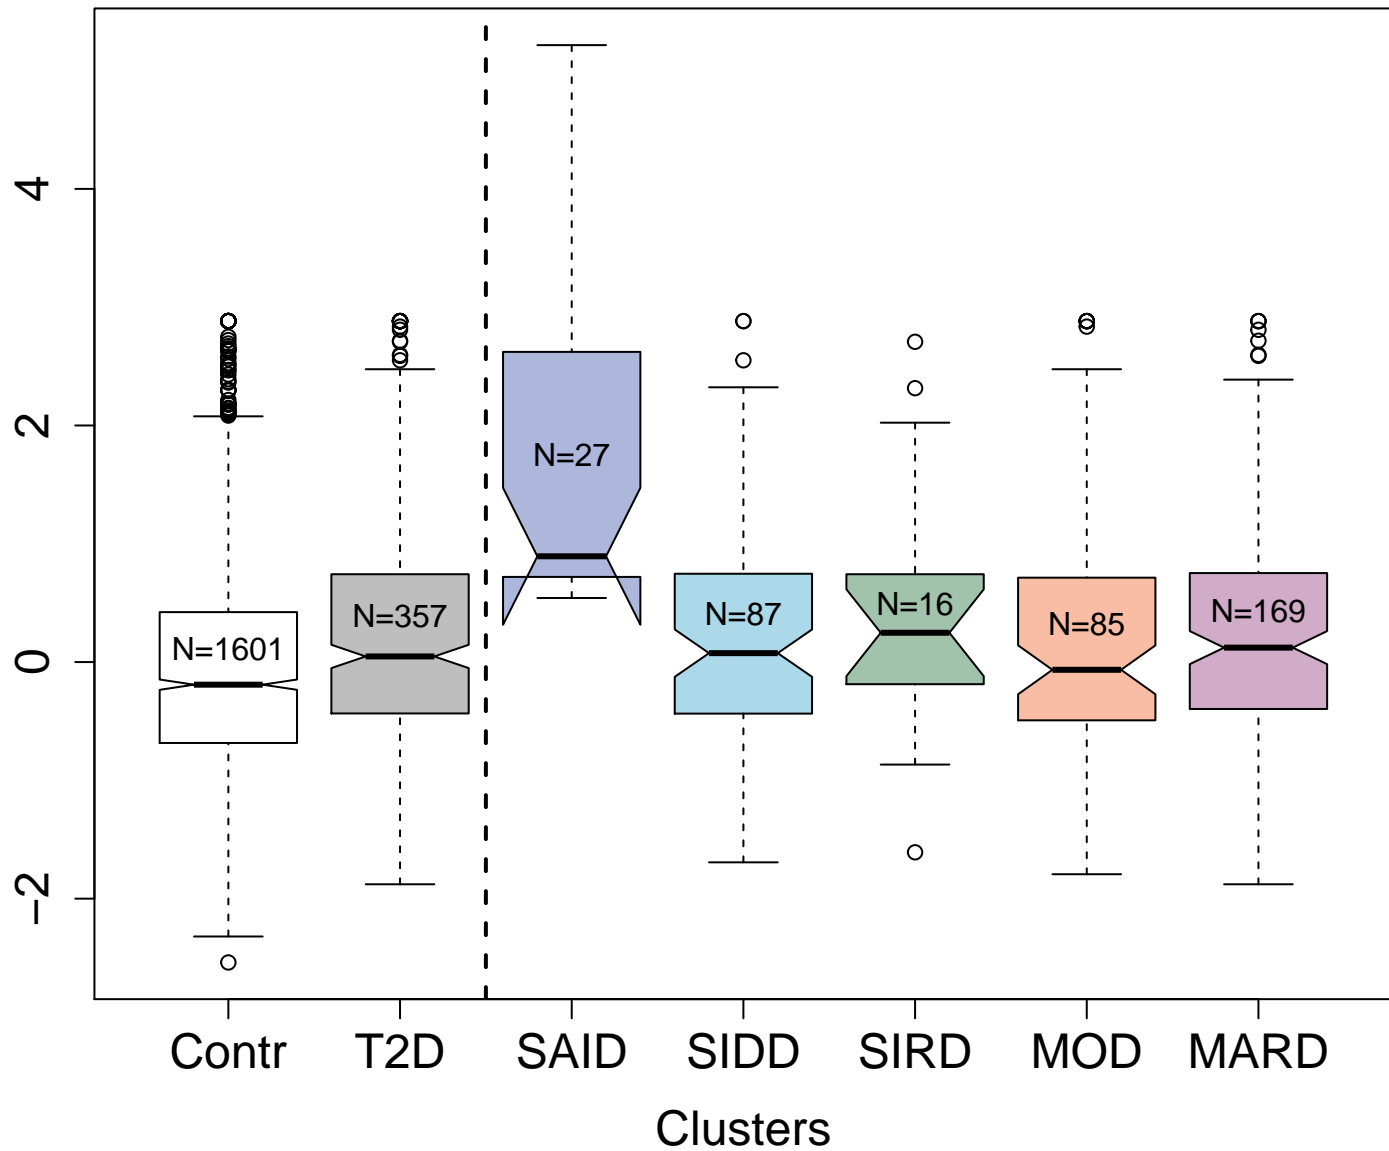

M17799 : ibuprofen

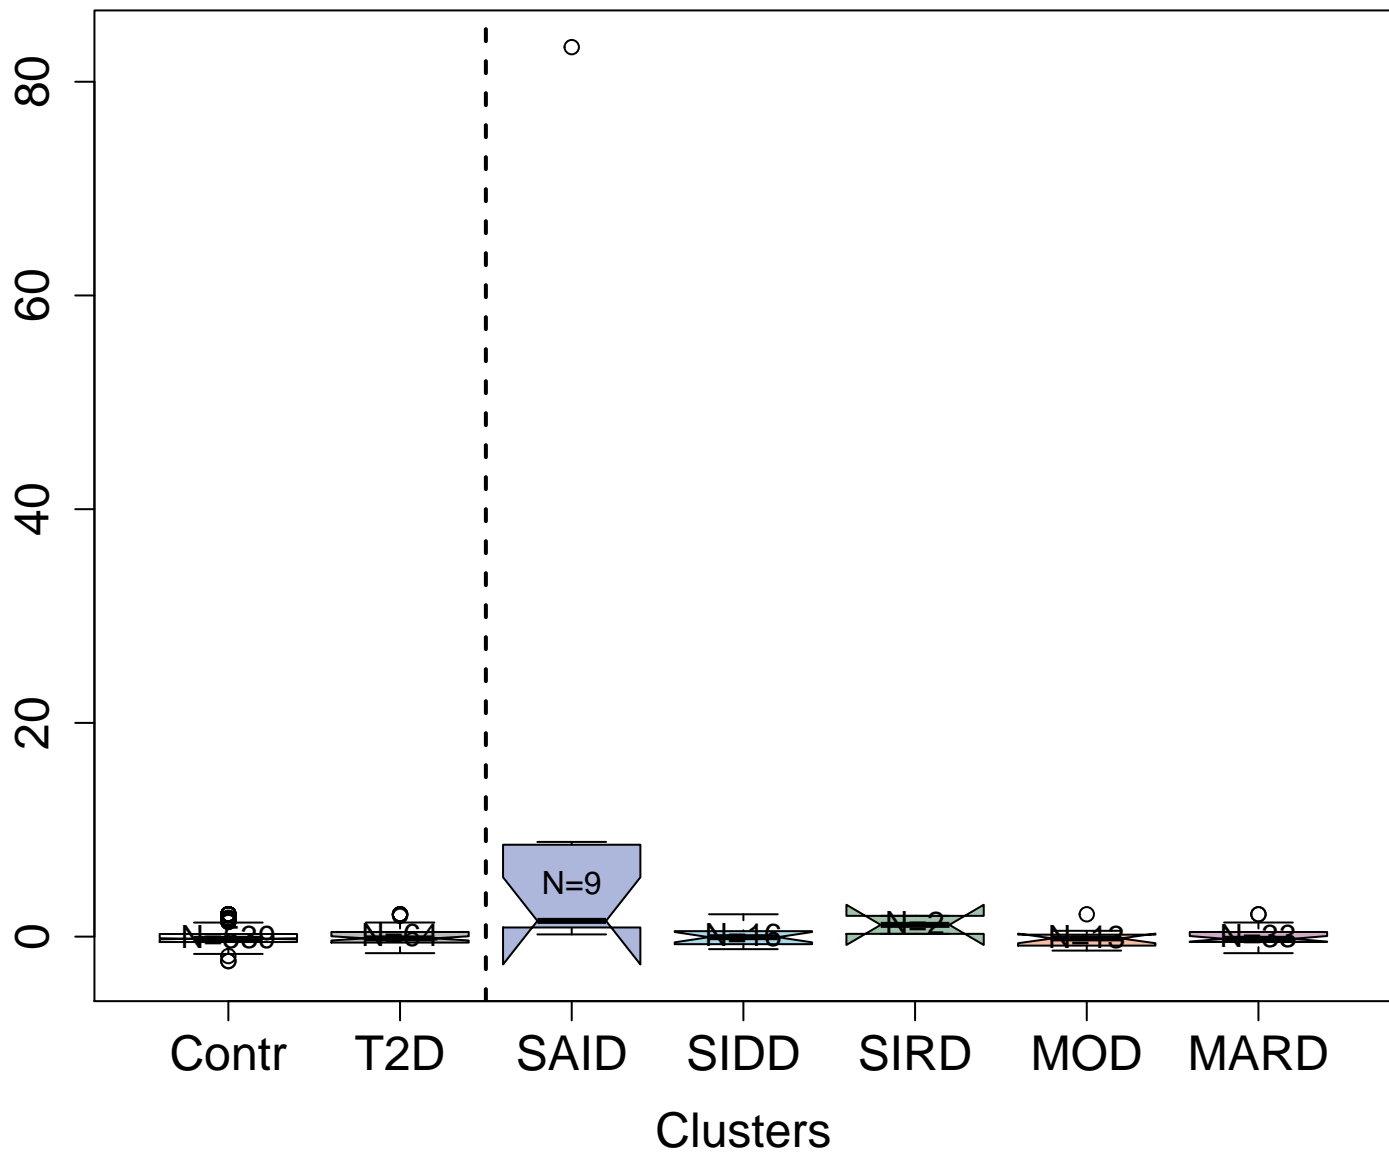

M47802 : X - 16397

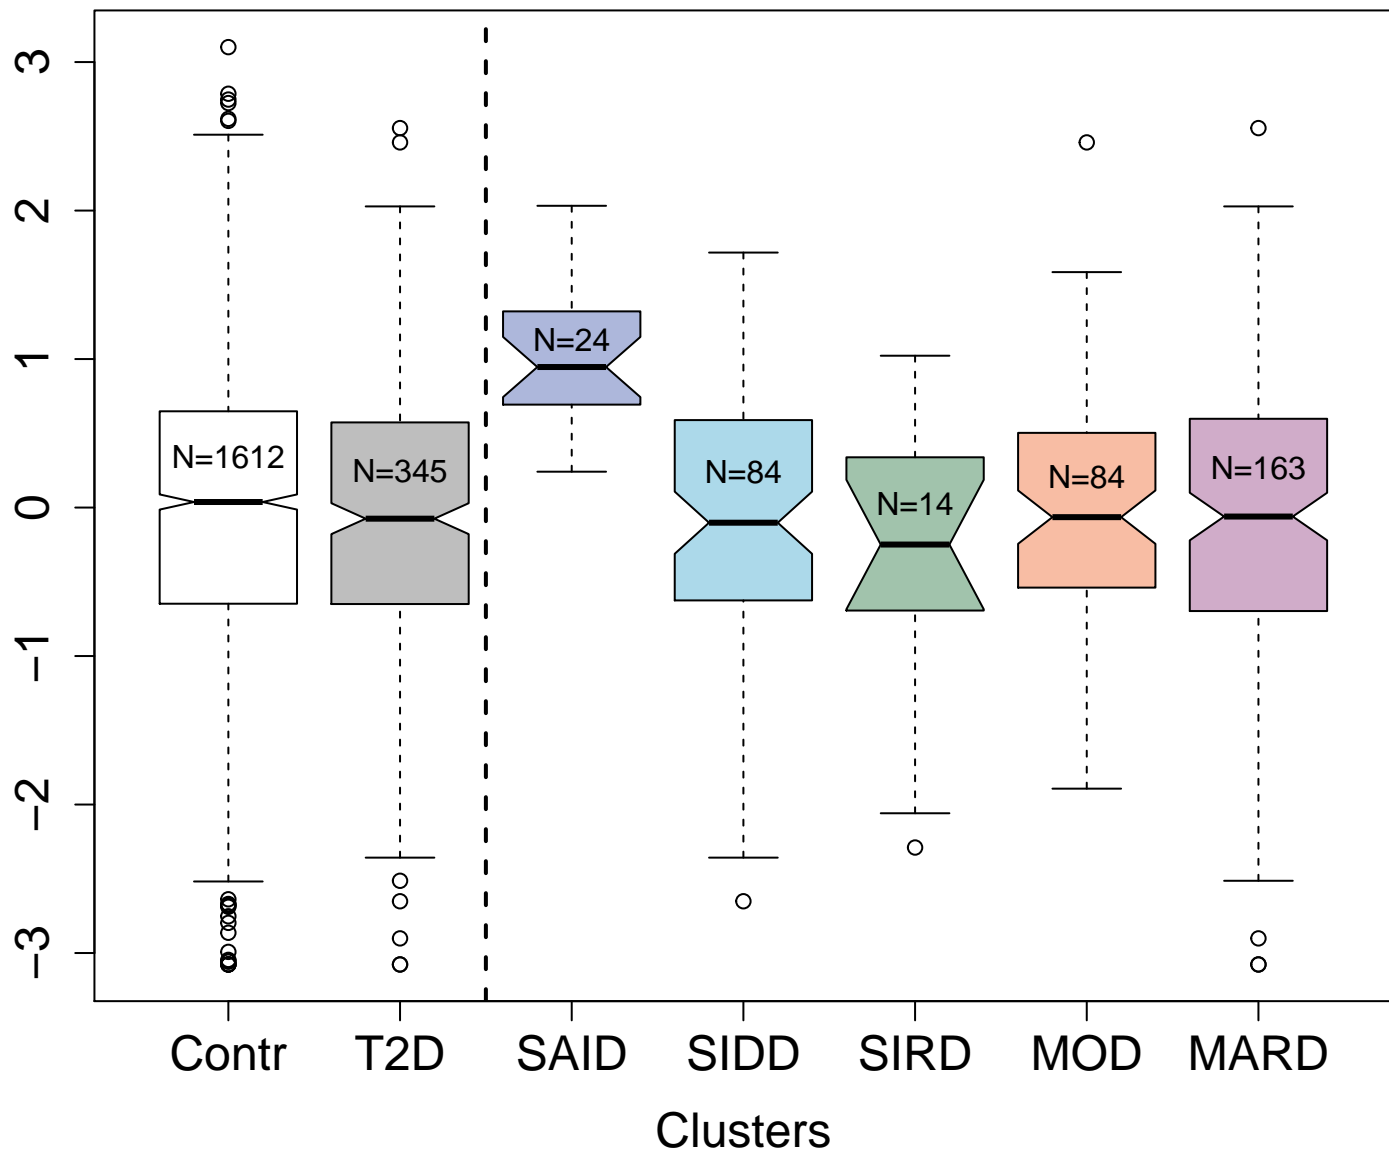

M61860 : octadecadienedioate (C18:2-DC)\*

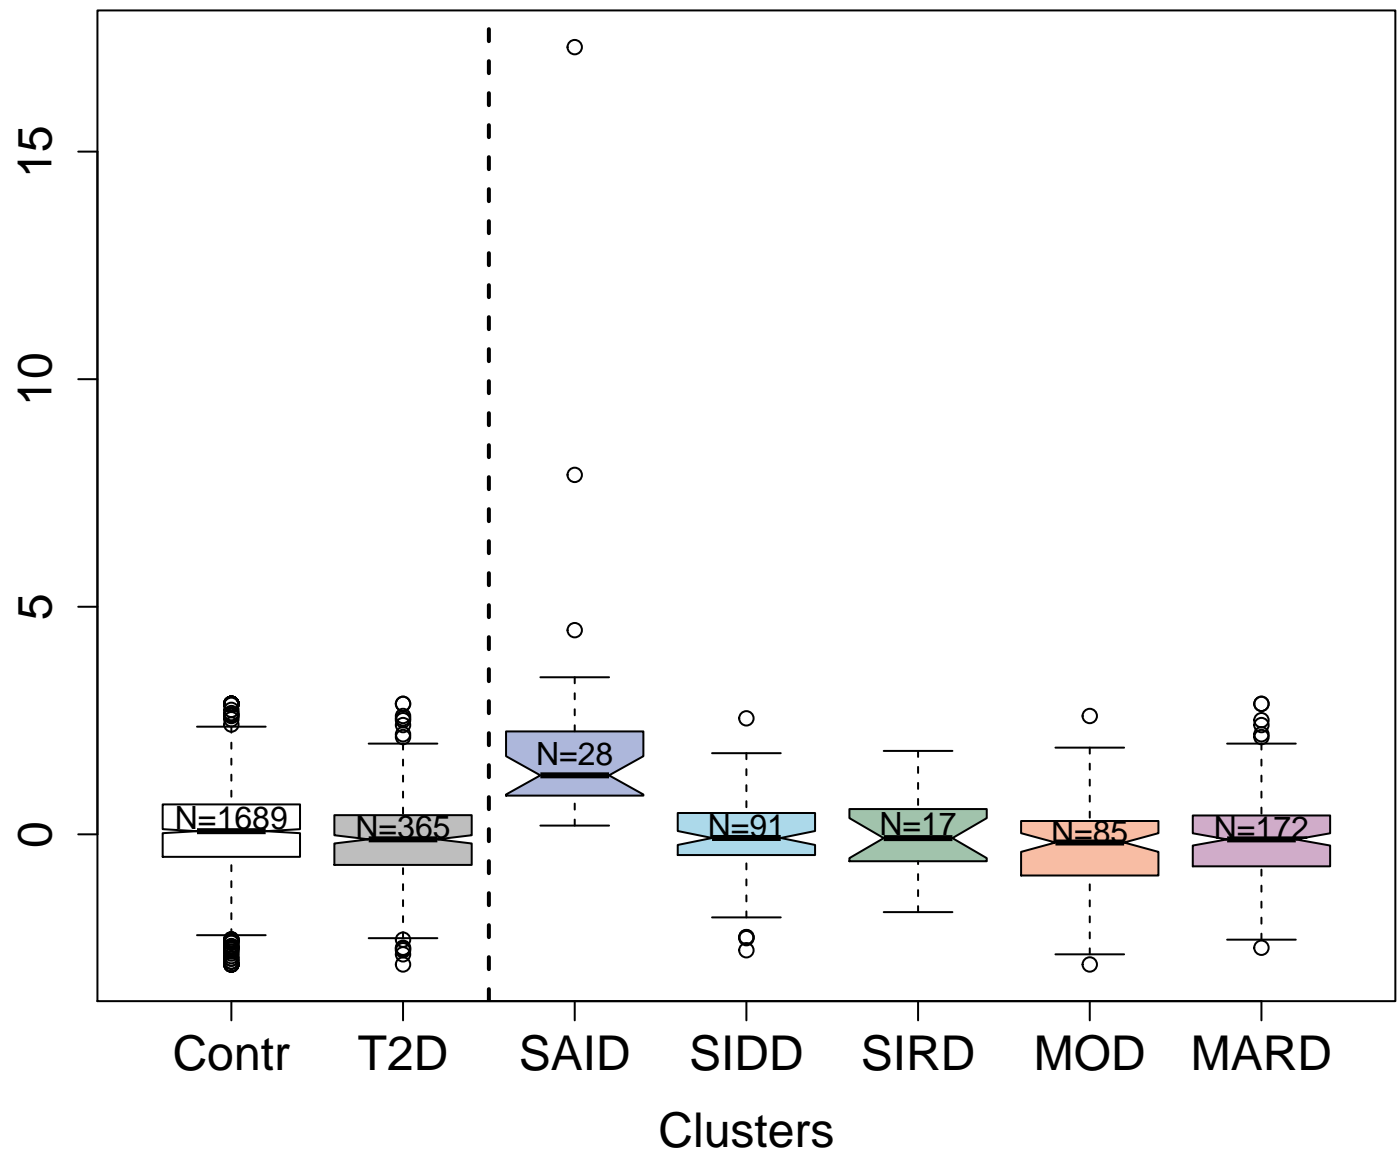



M1110 : arachidonate (20:4n6)

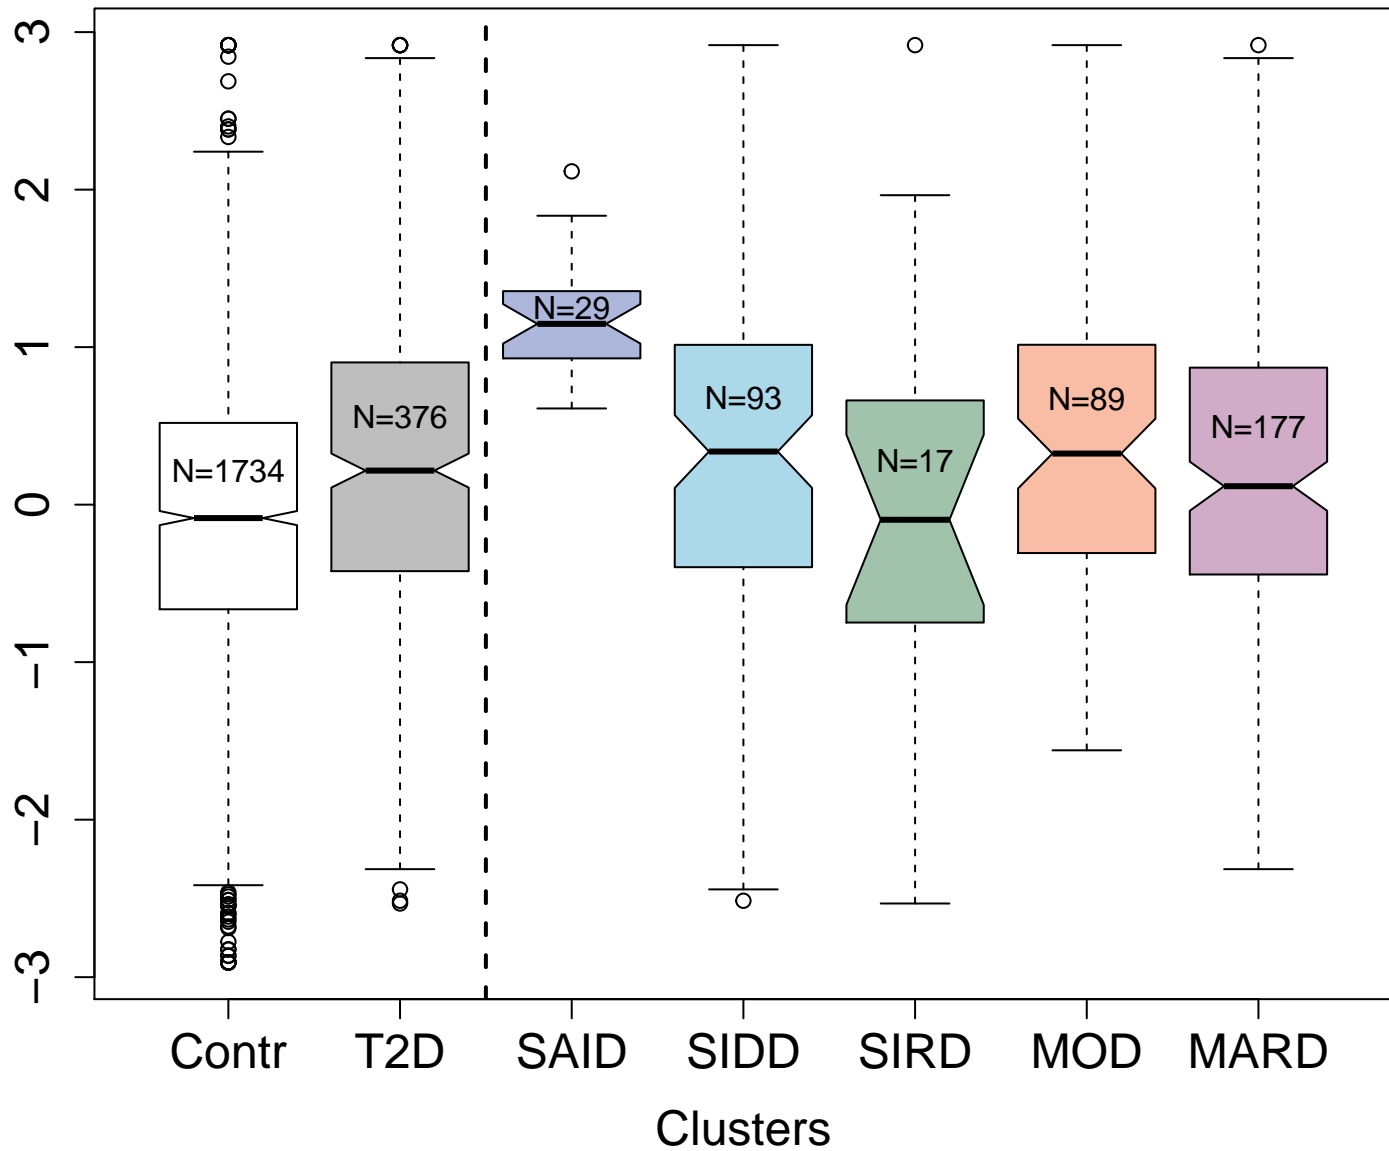

M1123 : inosine

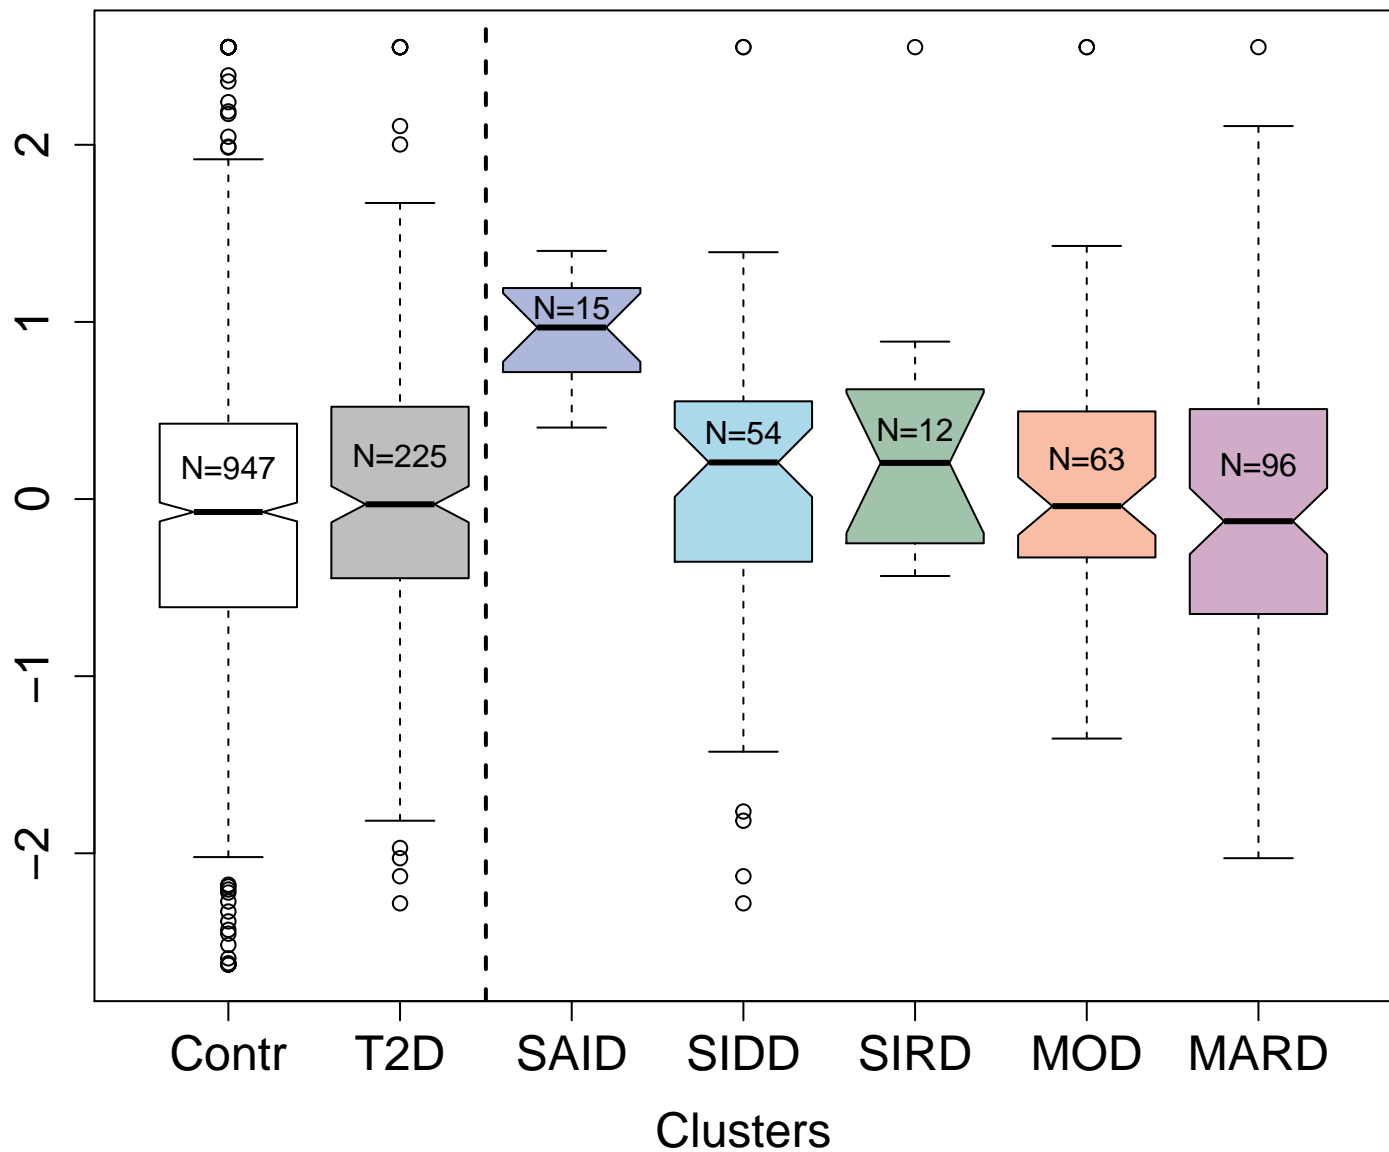

M32398 : seabate (C10-DC)

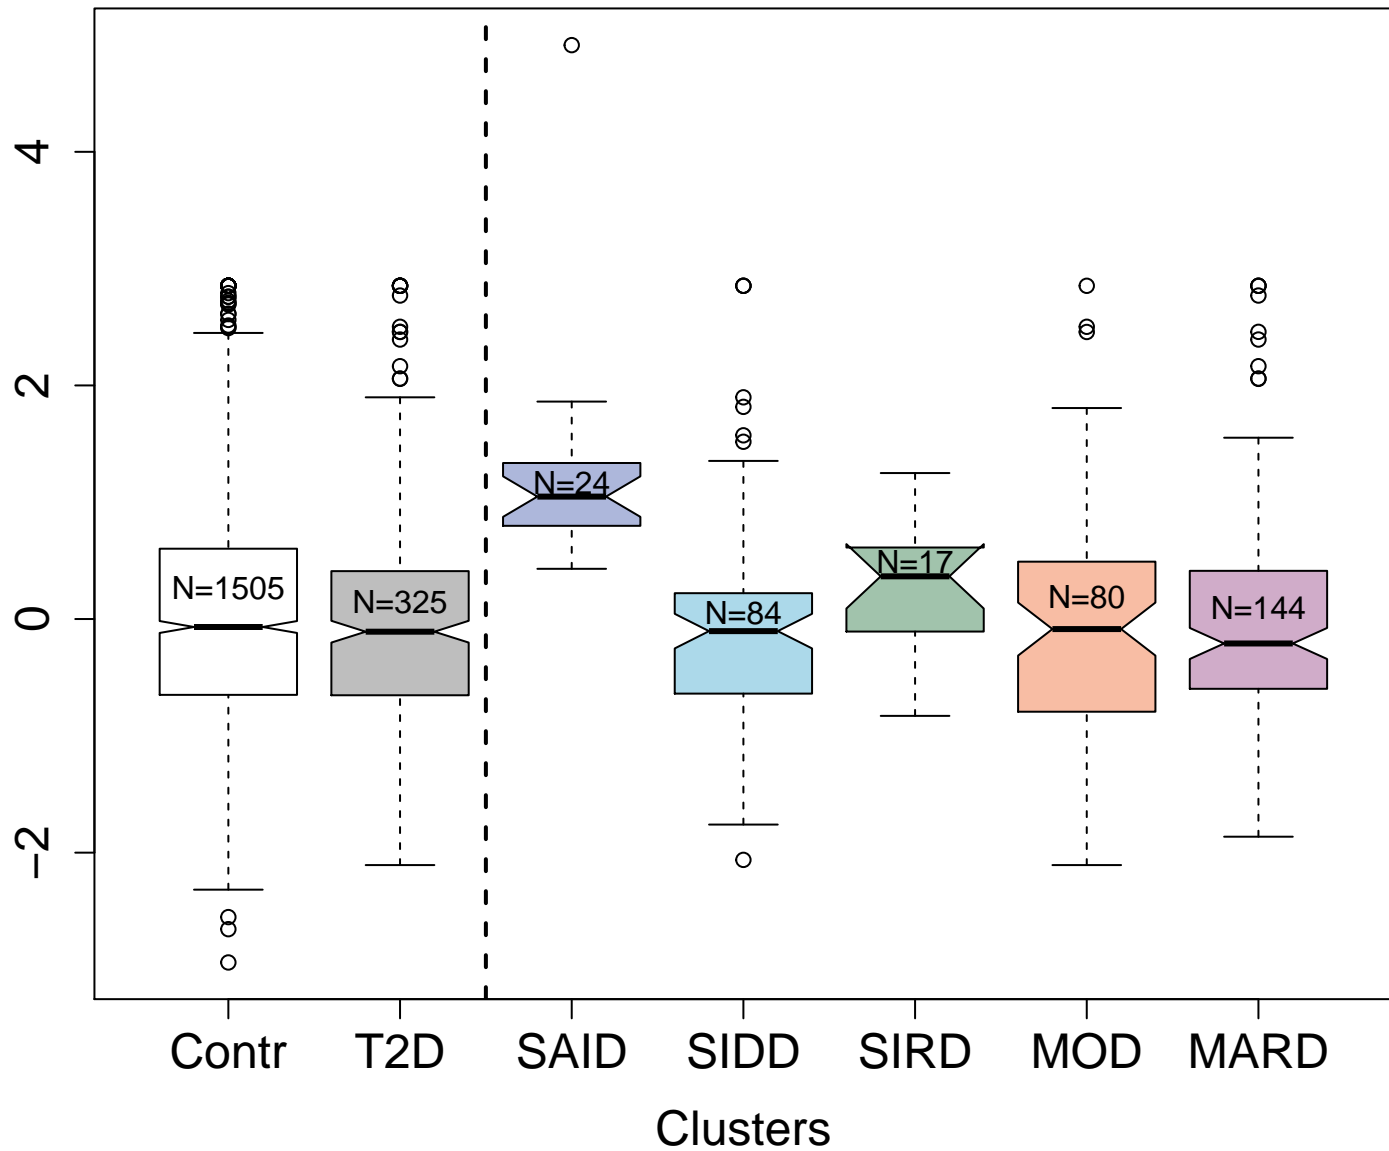

M49525 : X - 23648

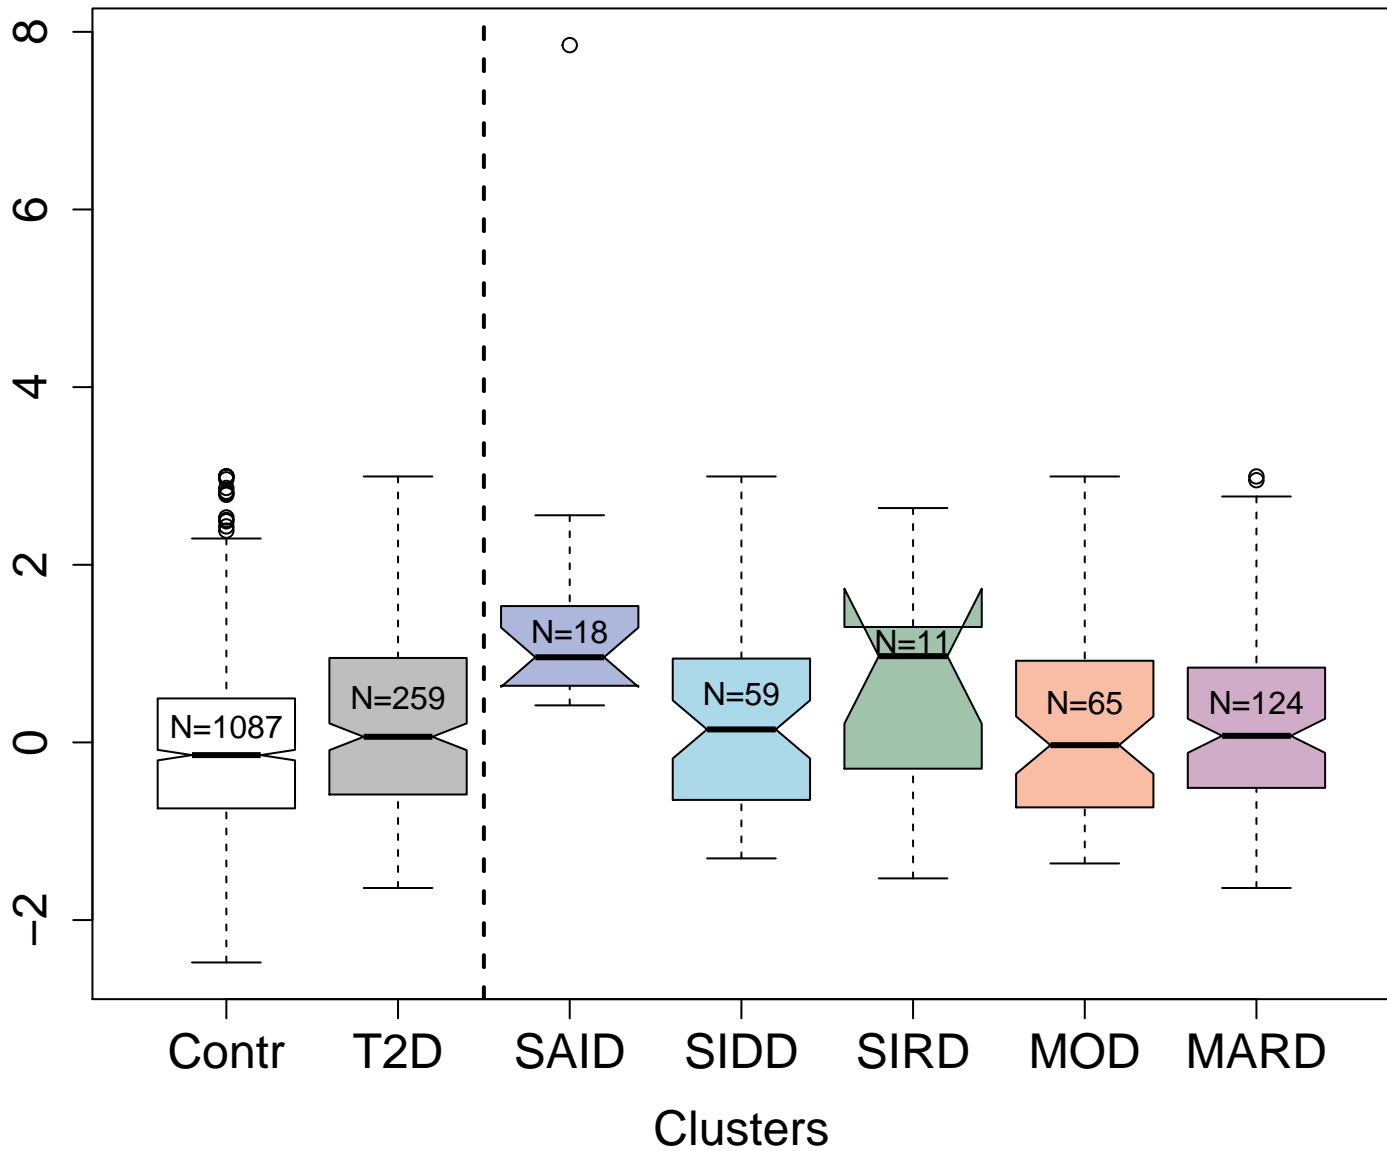

M45415 : 3-(3-hydroxyphenyl)propionate sulfate

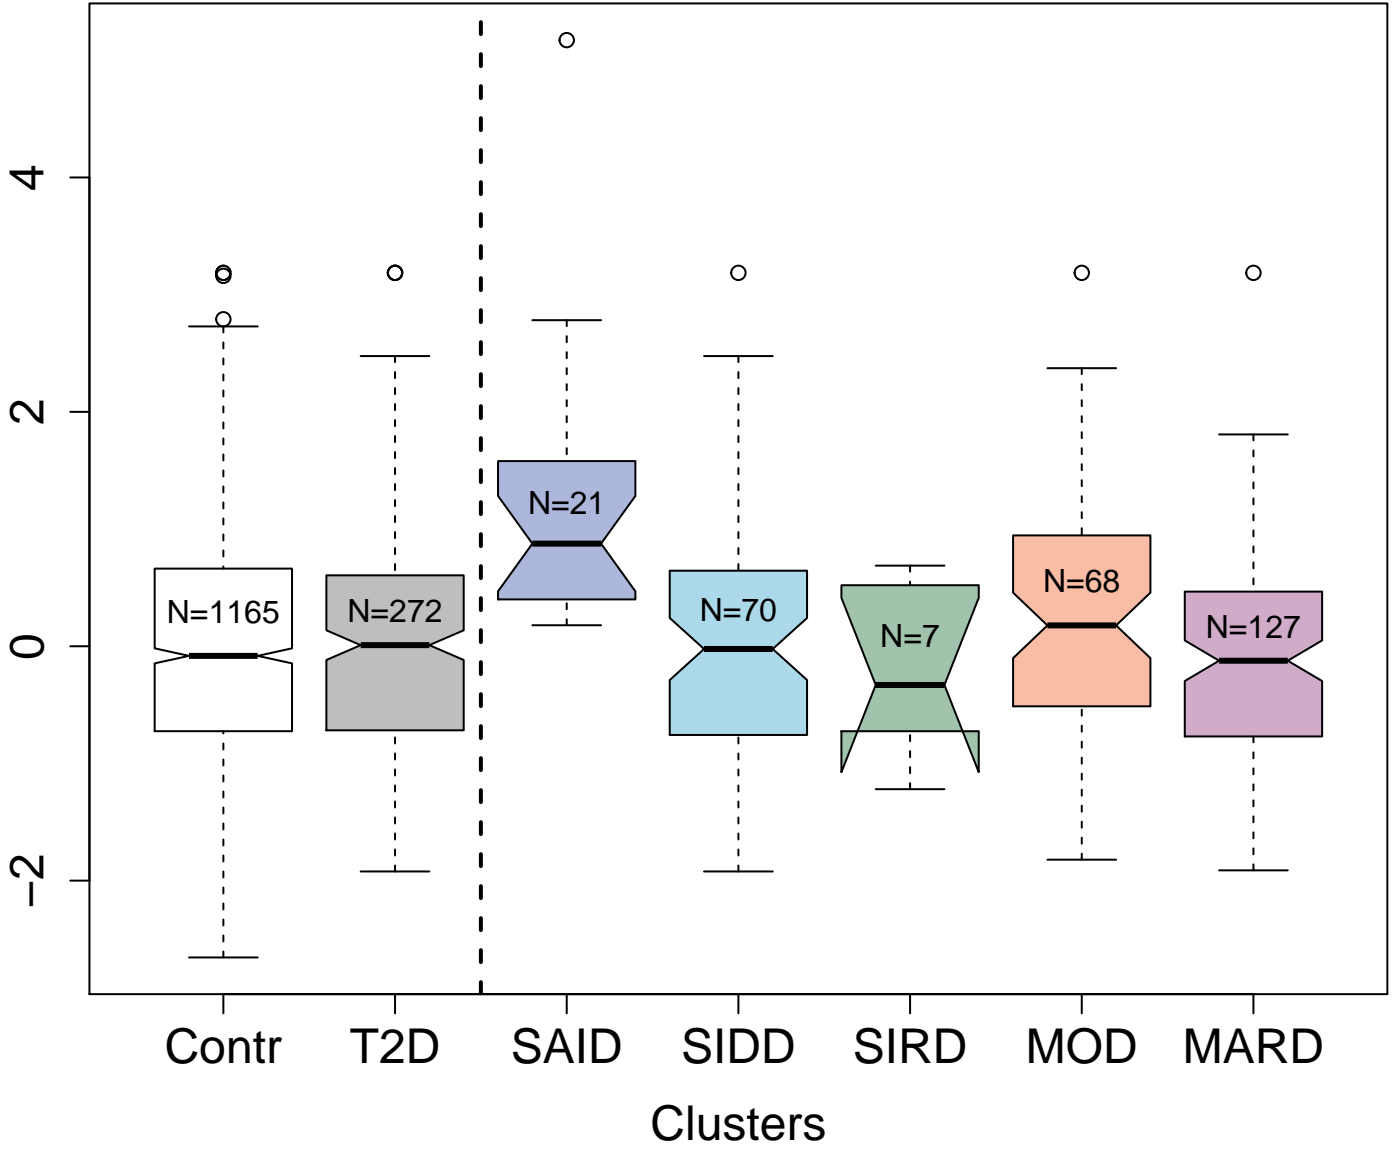

M17945 : 2-hydroxysteerate

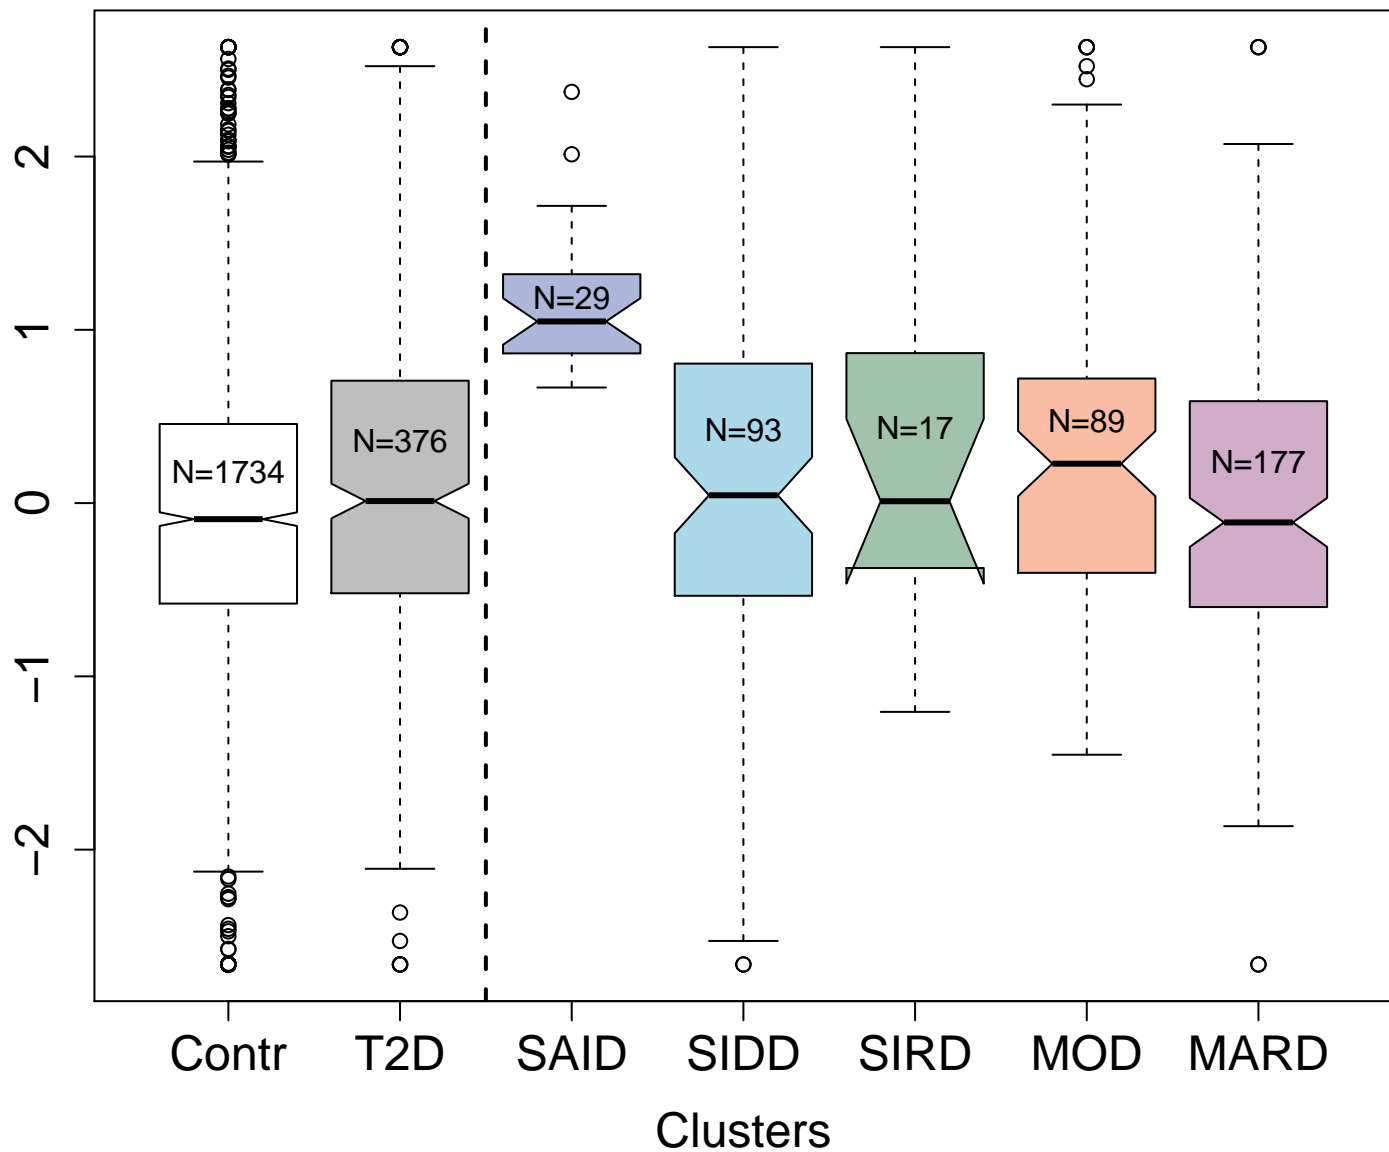

M43470 : 3-hydroxycytidine glucuronide

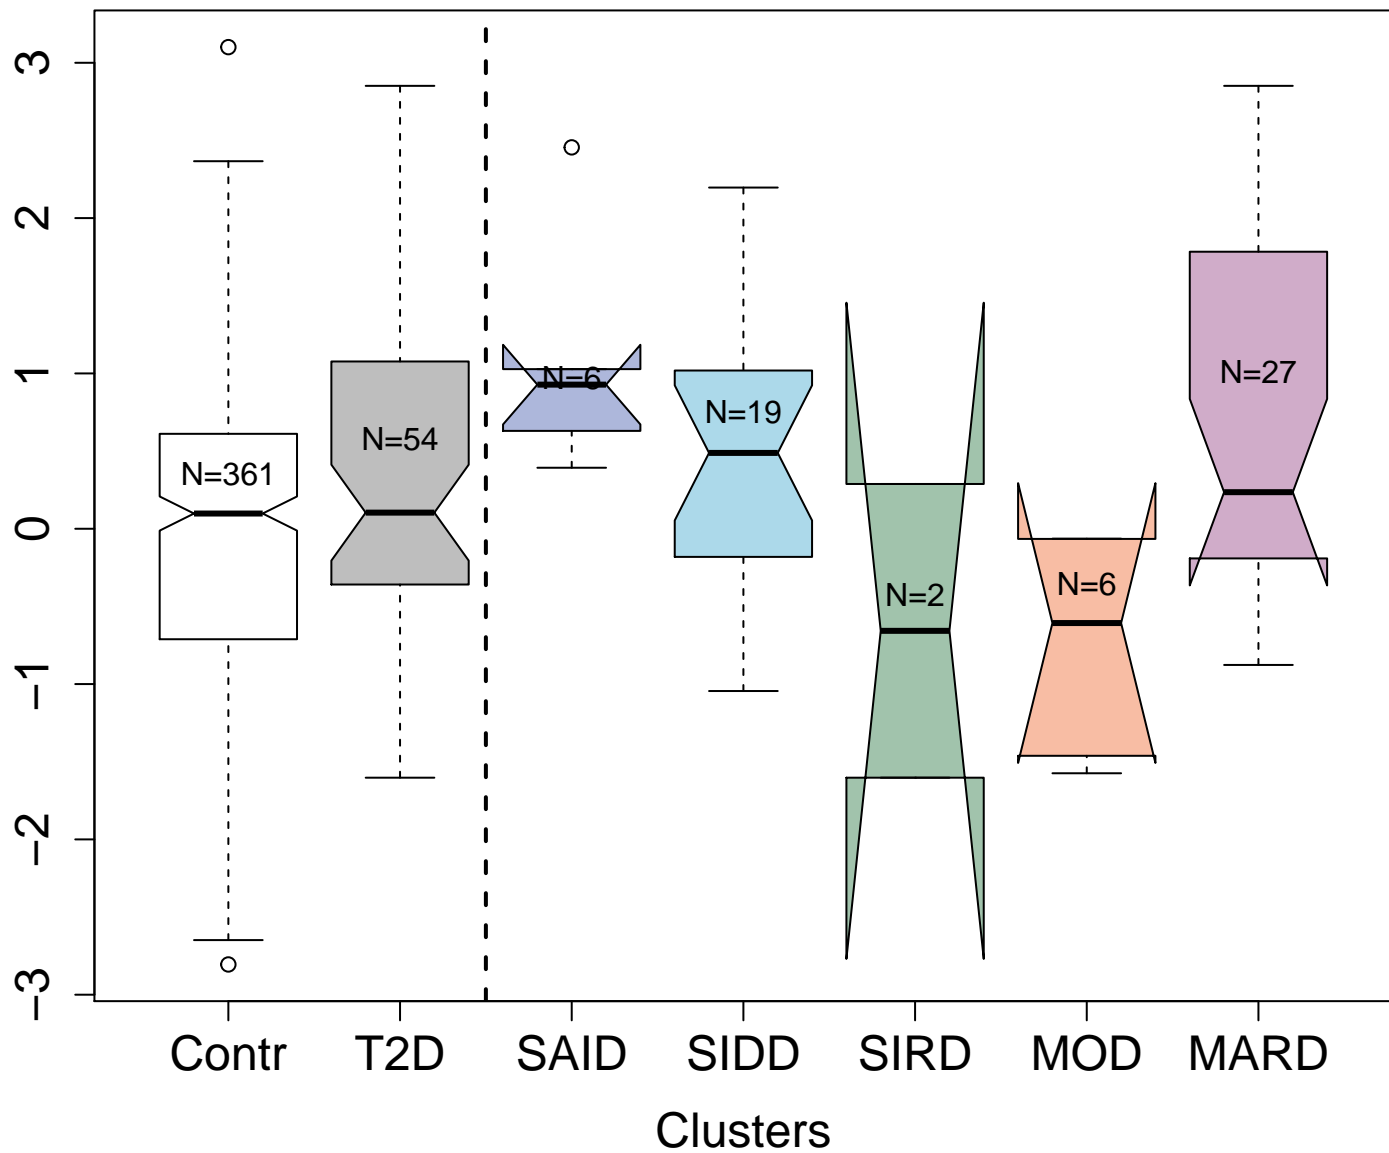

M1898 : proline

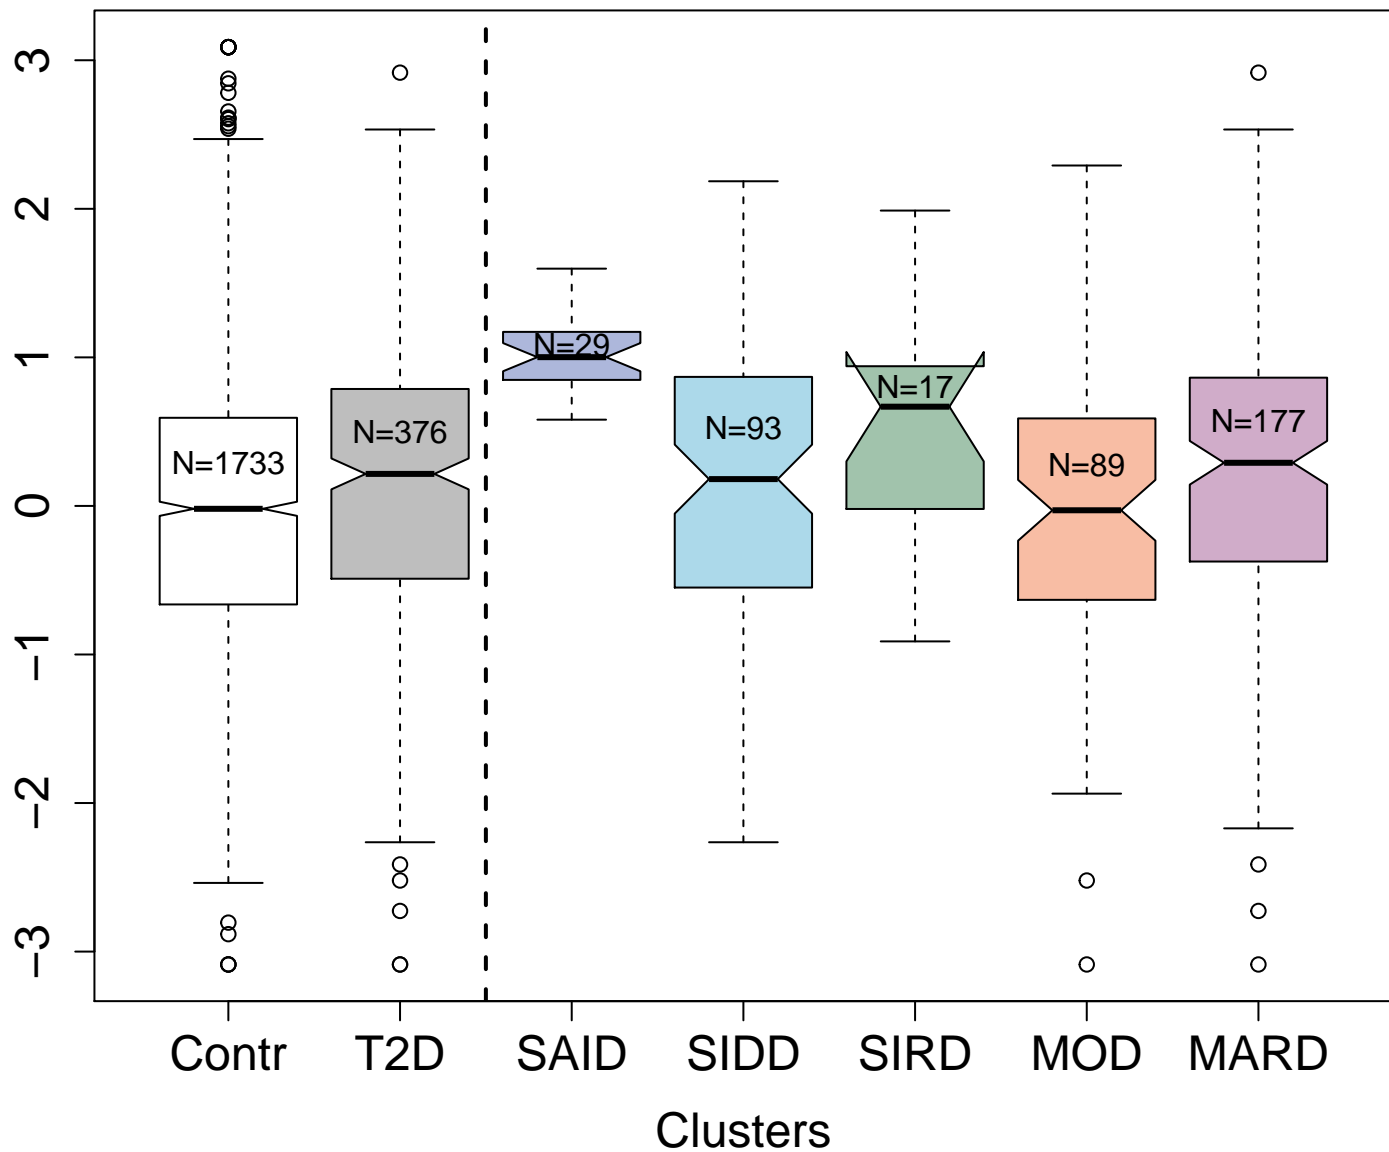



M35437 : isobutyrylglycine

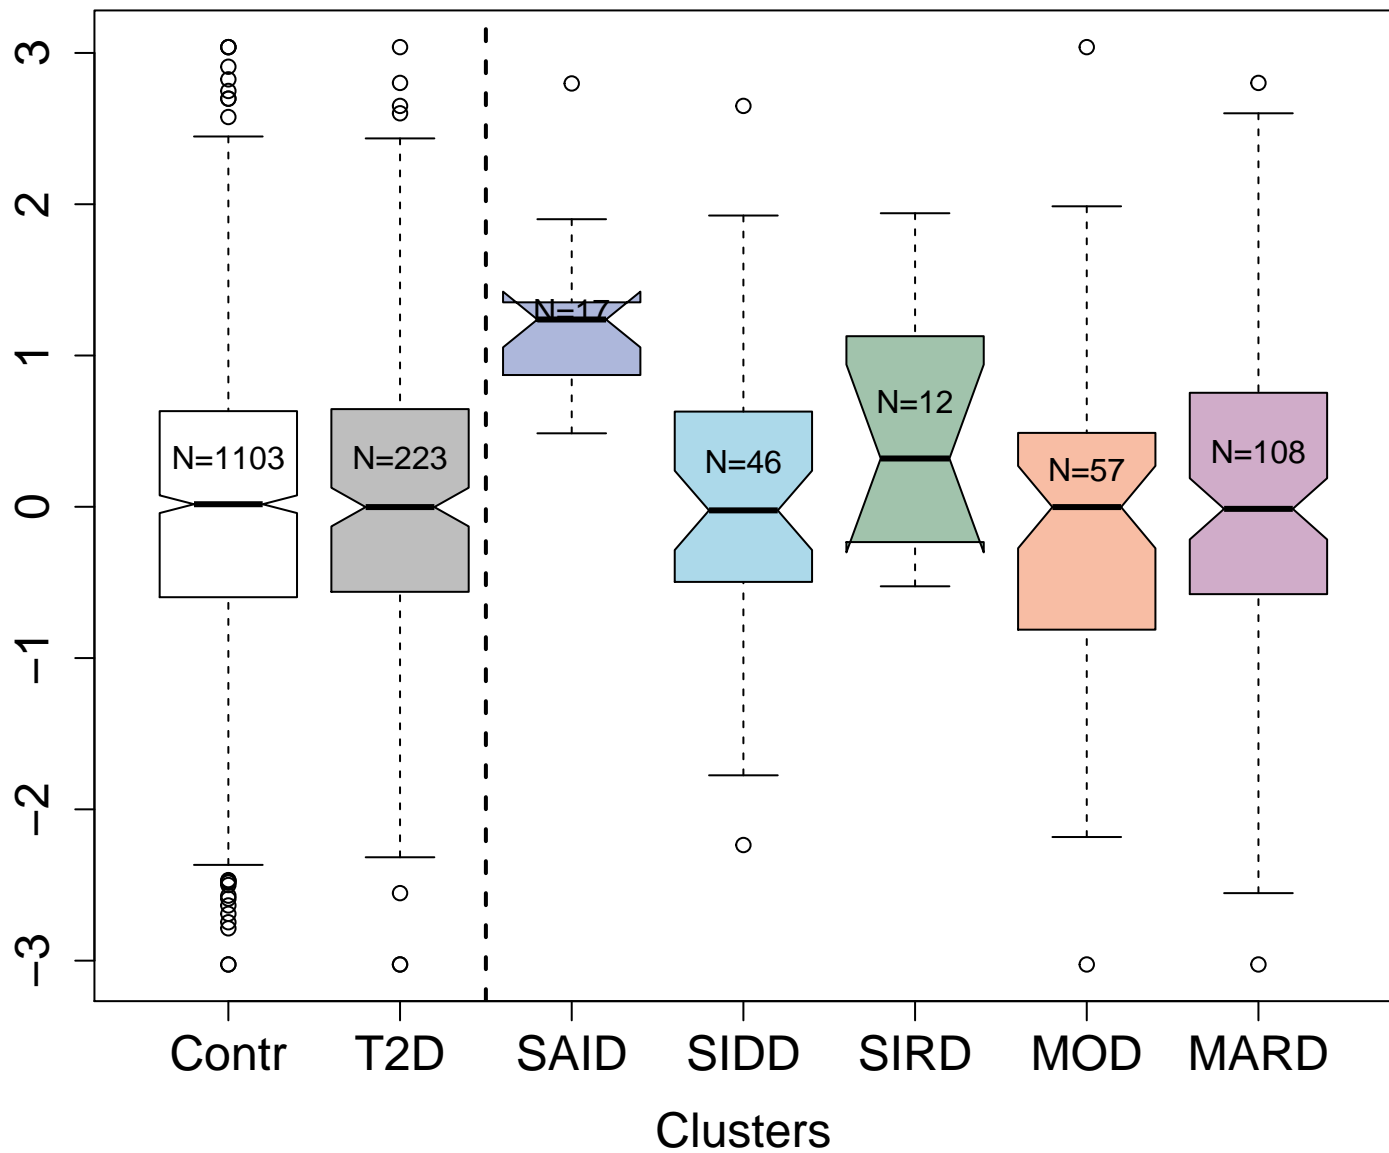

M46993 : X - 21816

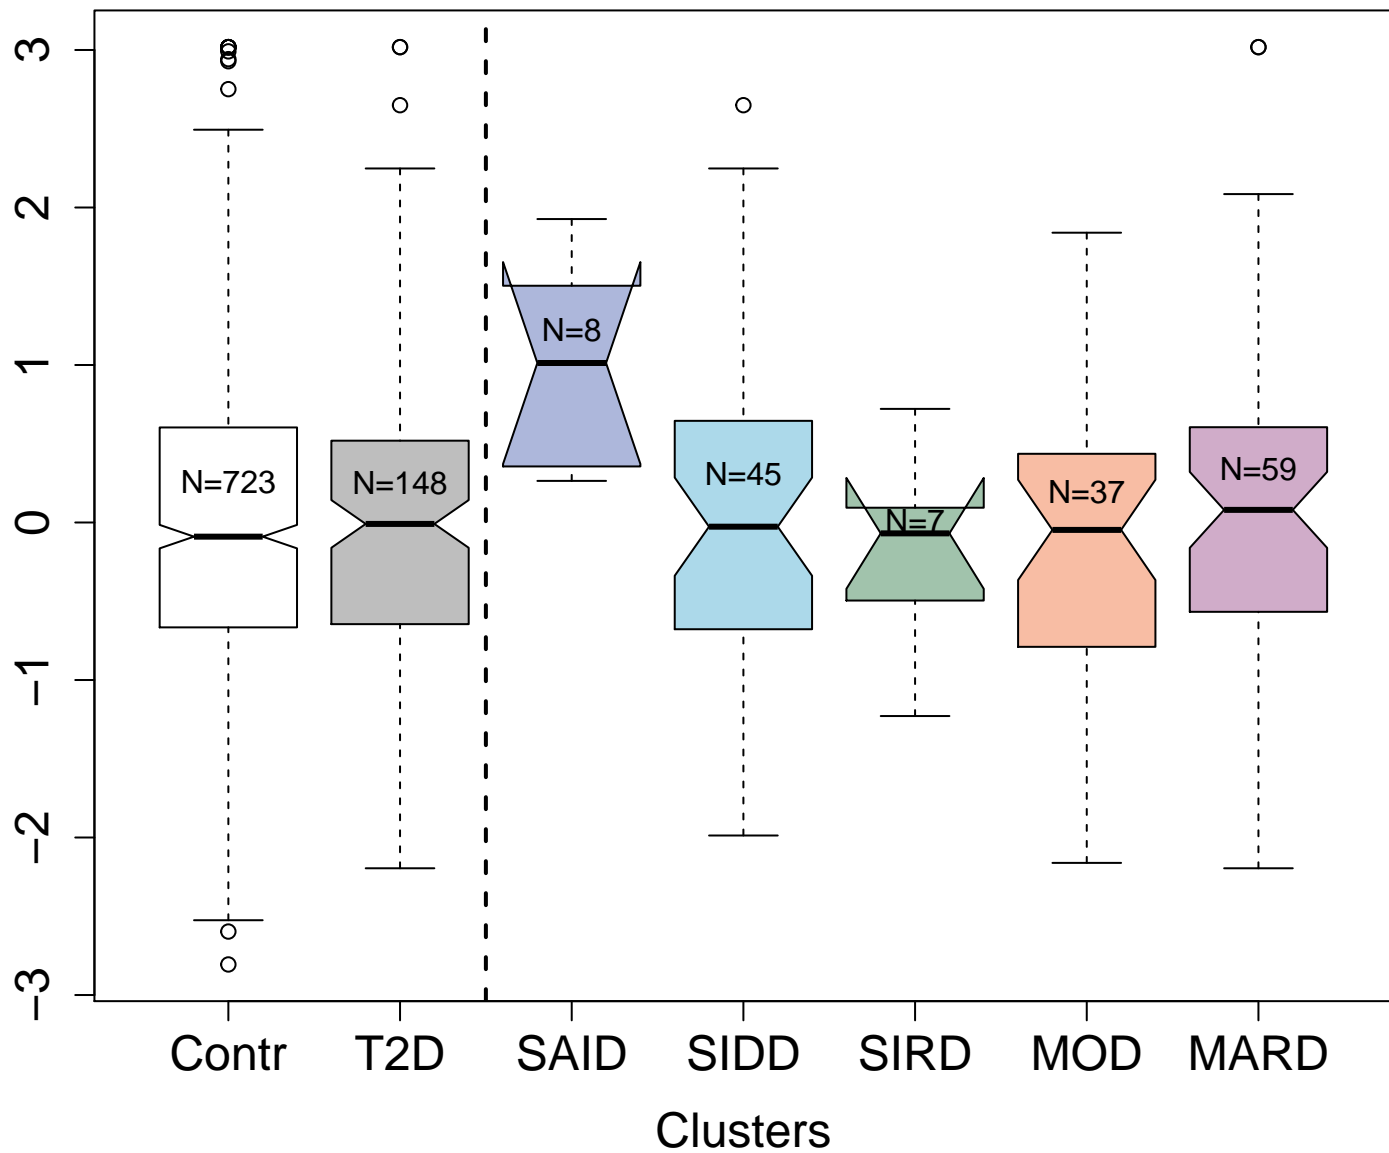

M63731 : glycosodeoxychoic acid sulfate (1)

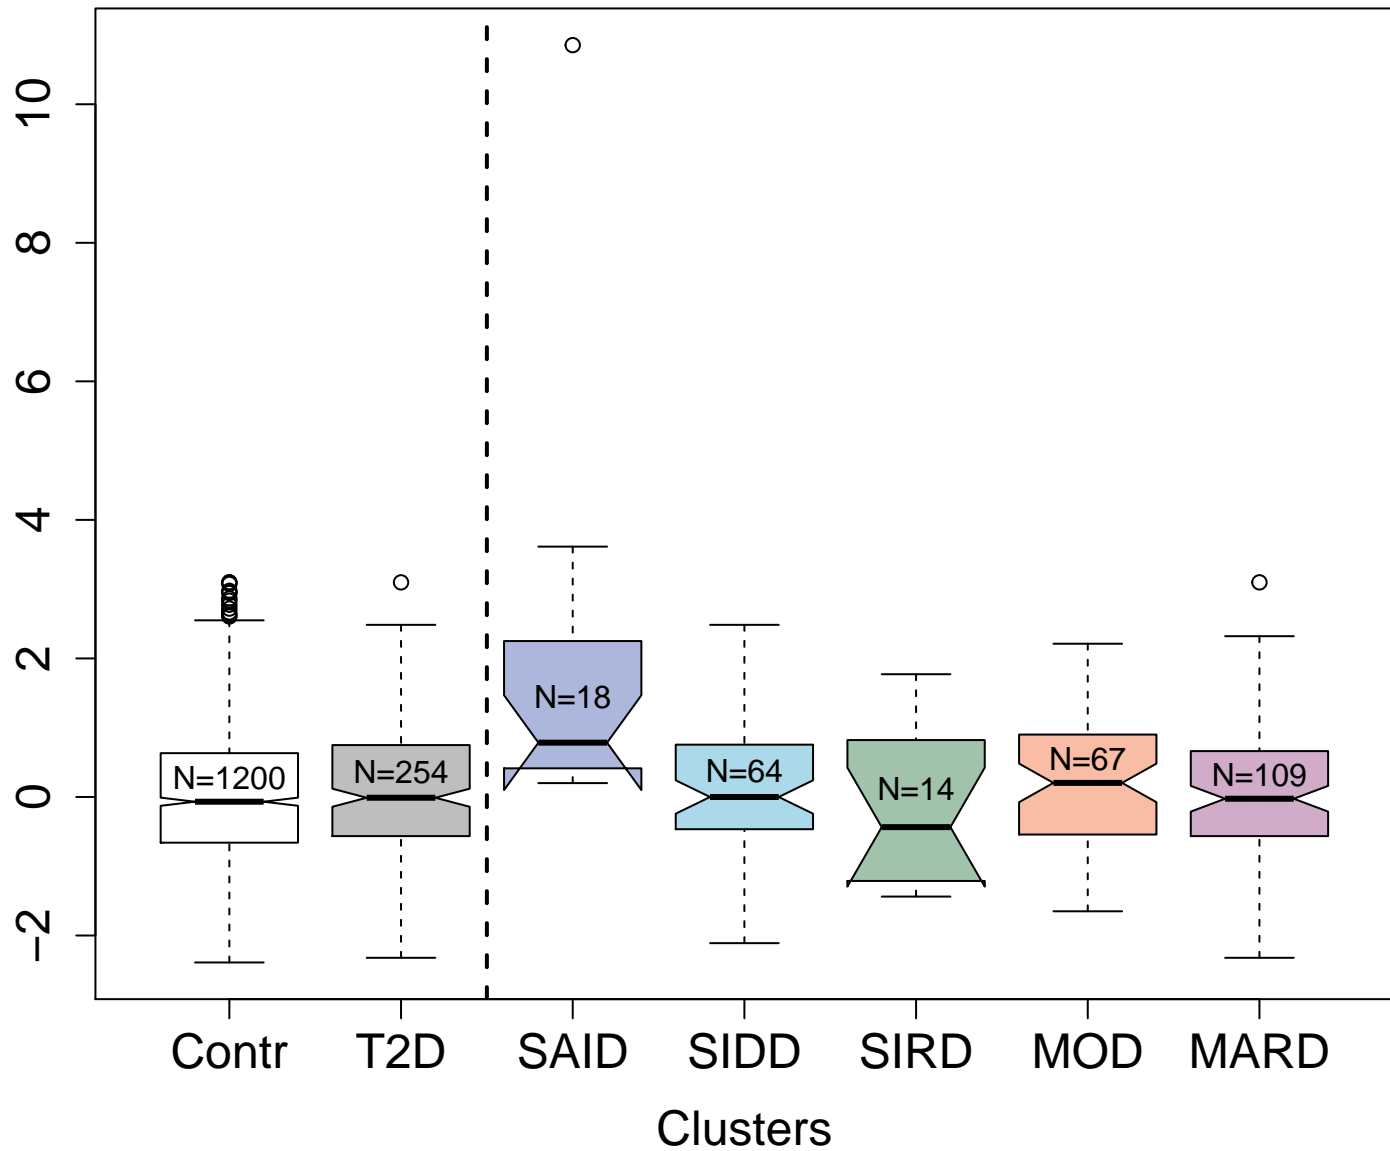

M1126 : alanine

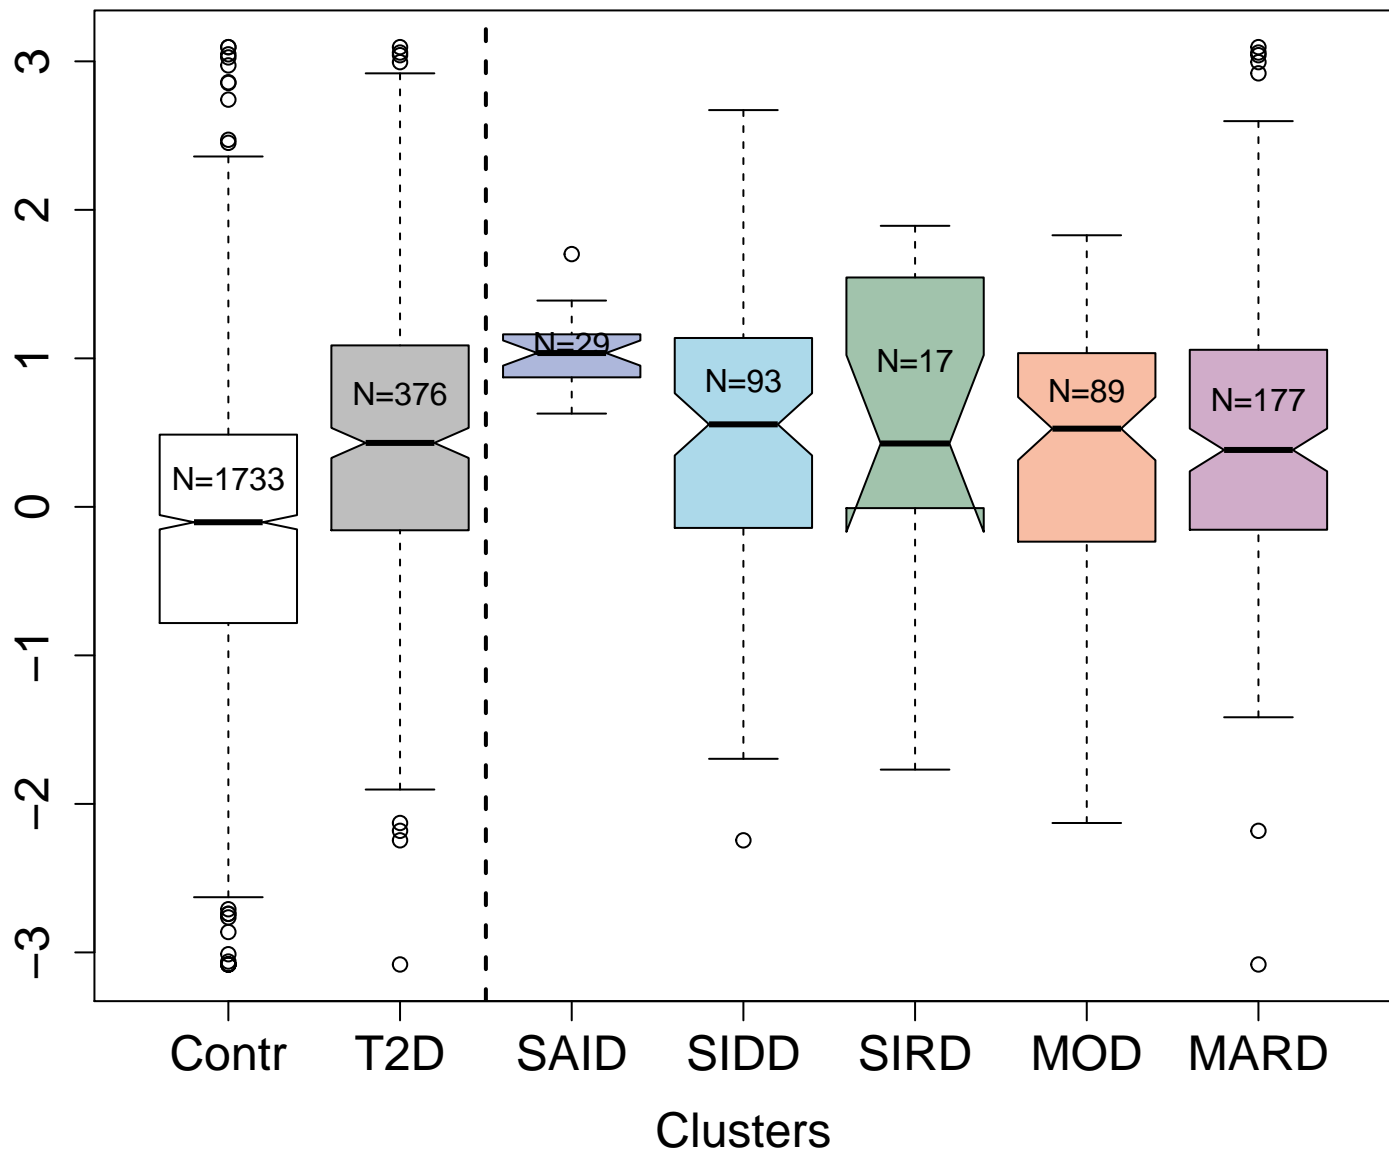

M27738 : threonate

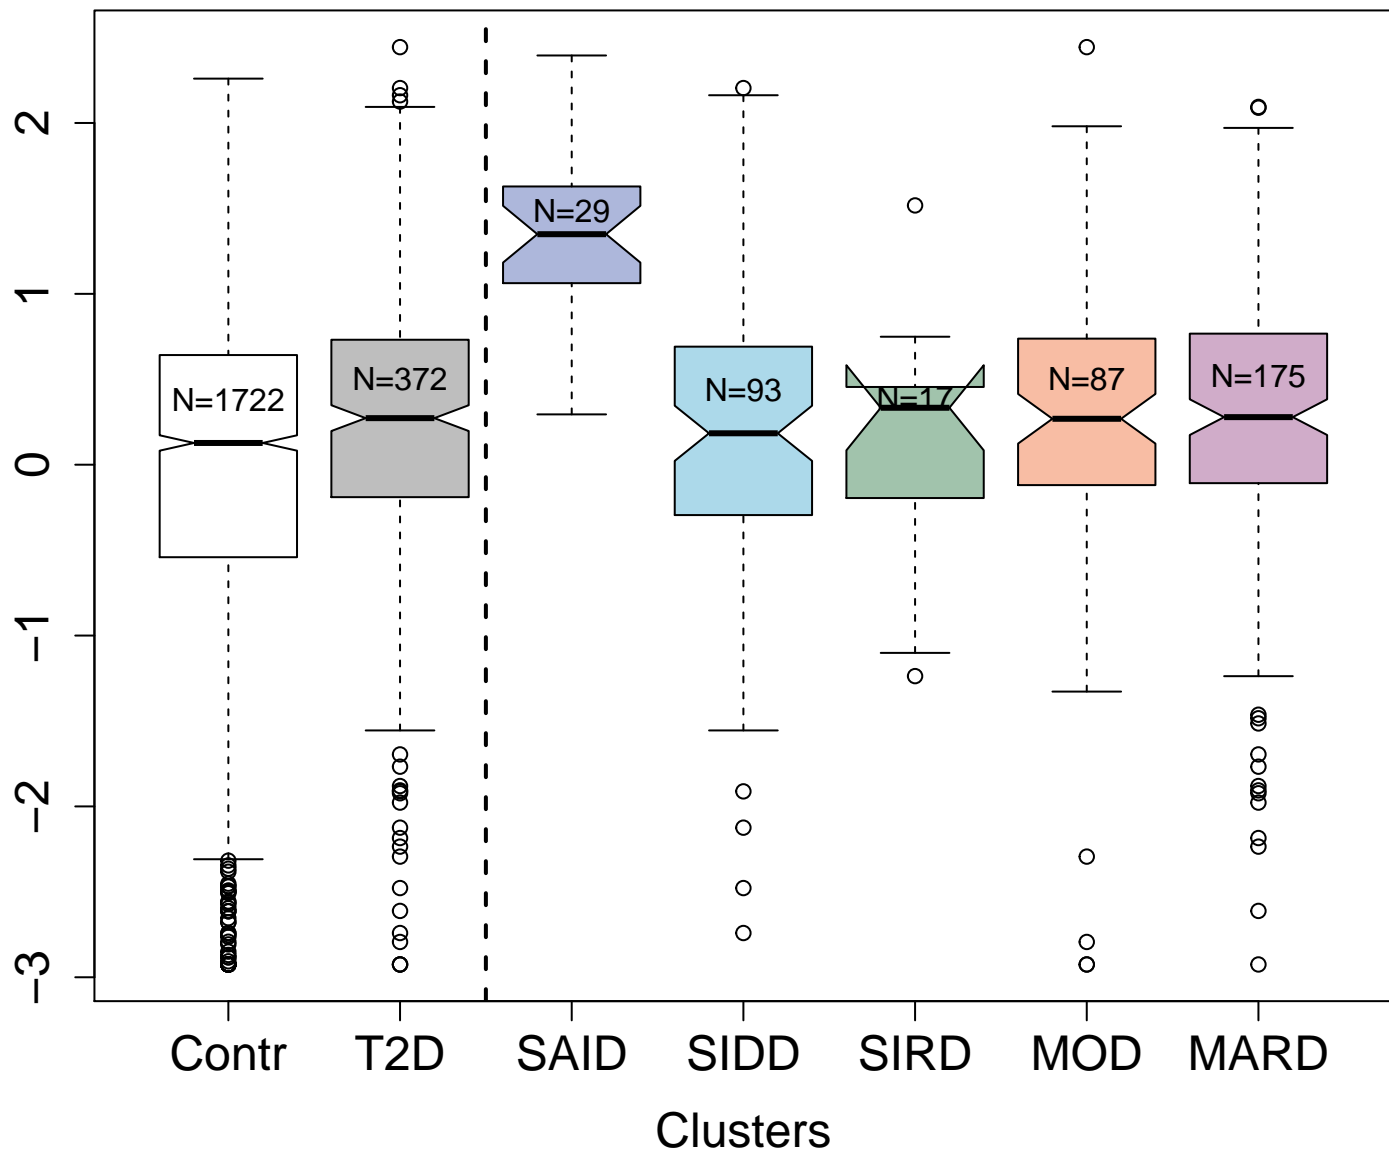

M36751 : N2-acetyllysine

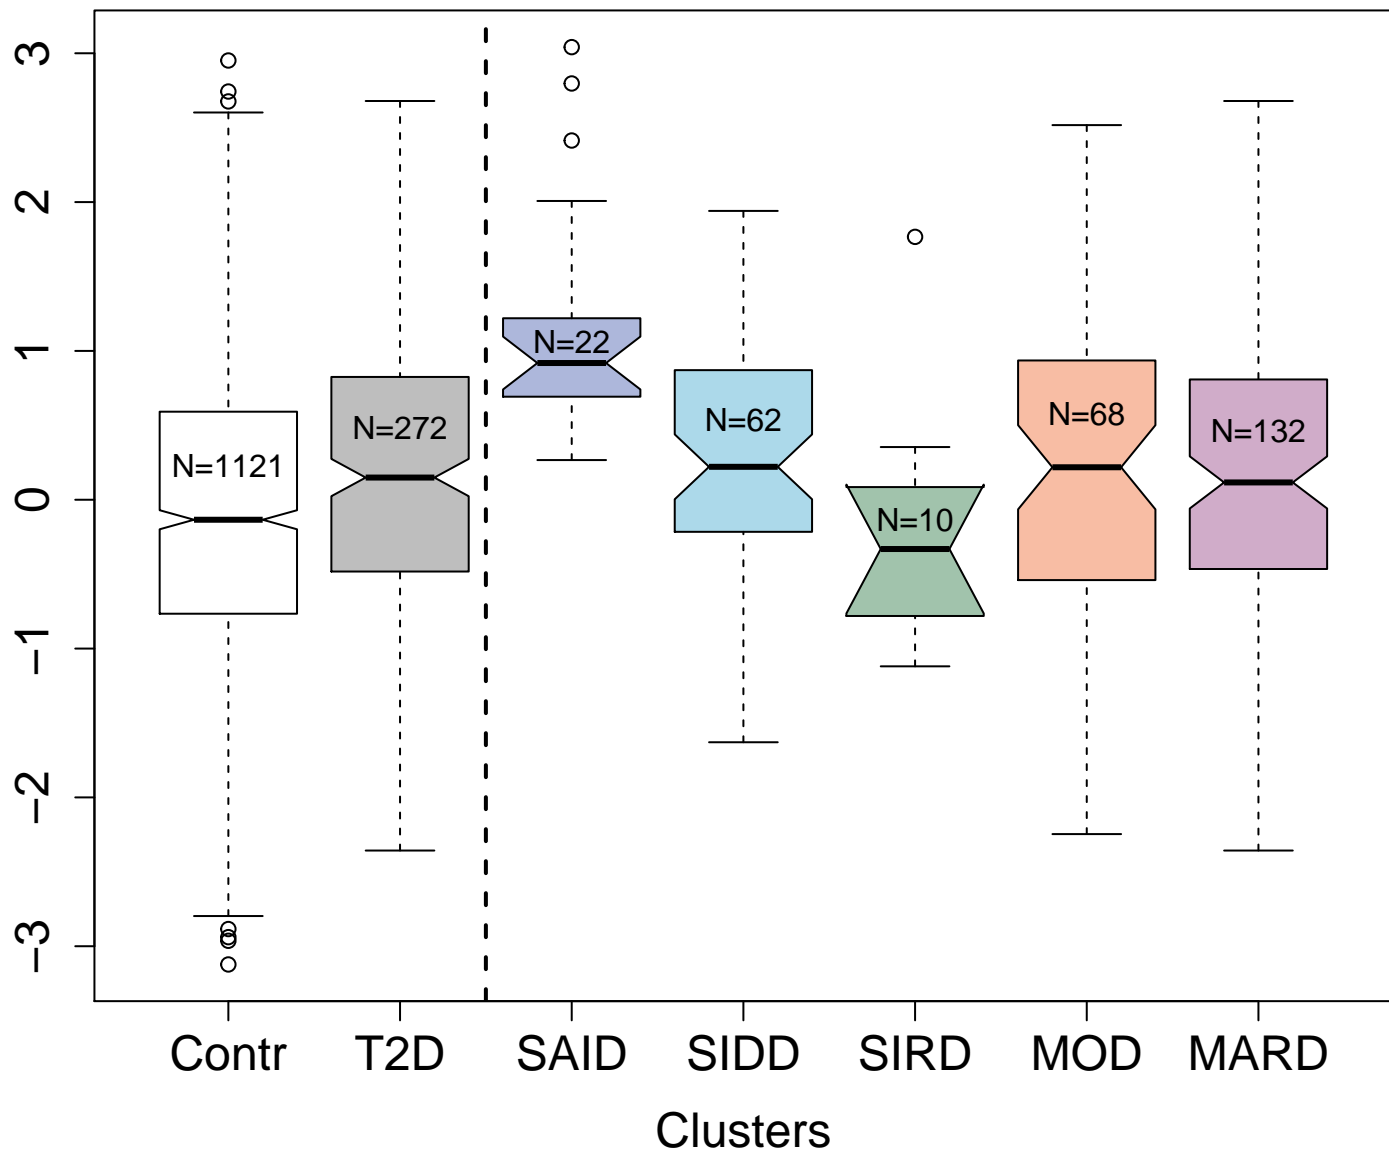

M43549 : N-formylanthranilic acid

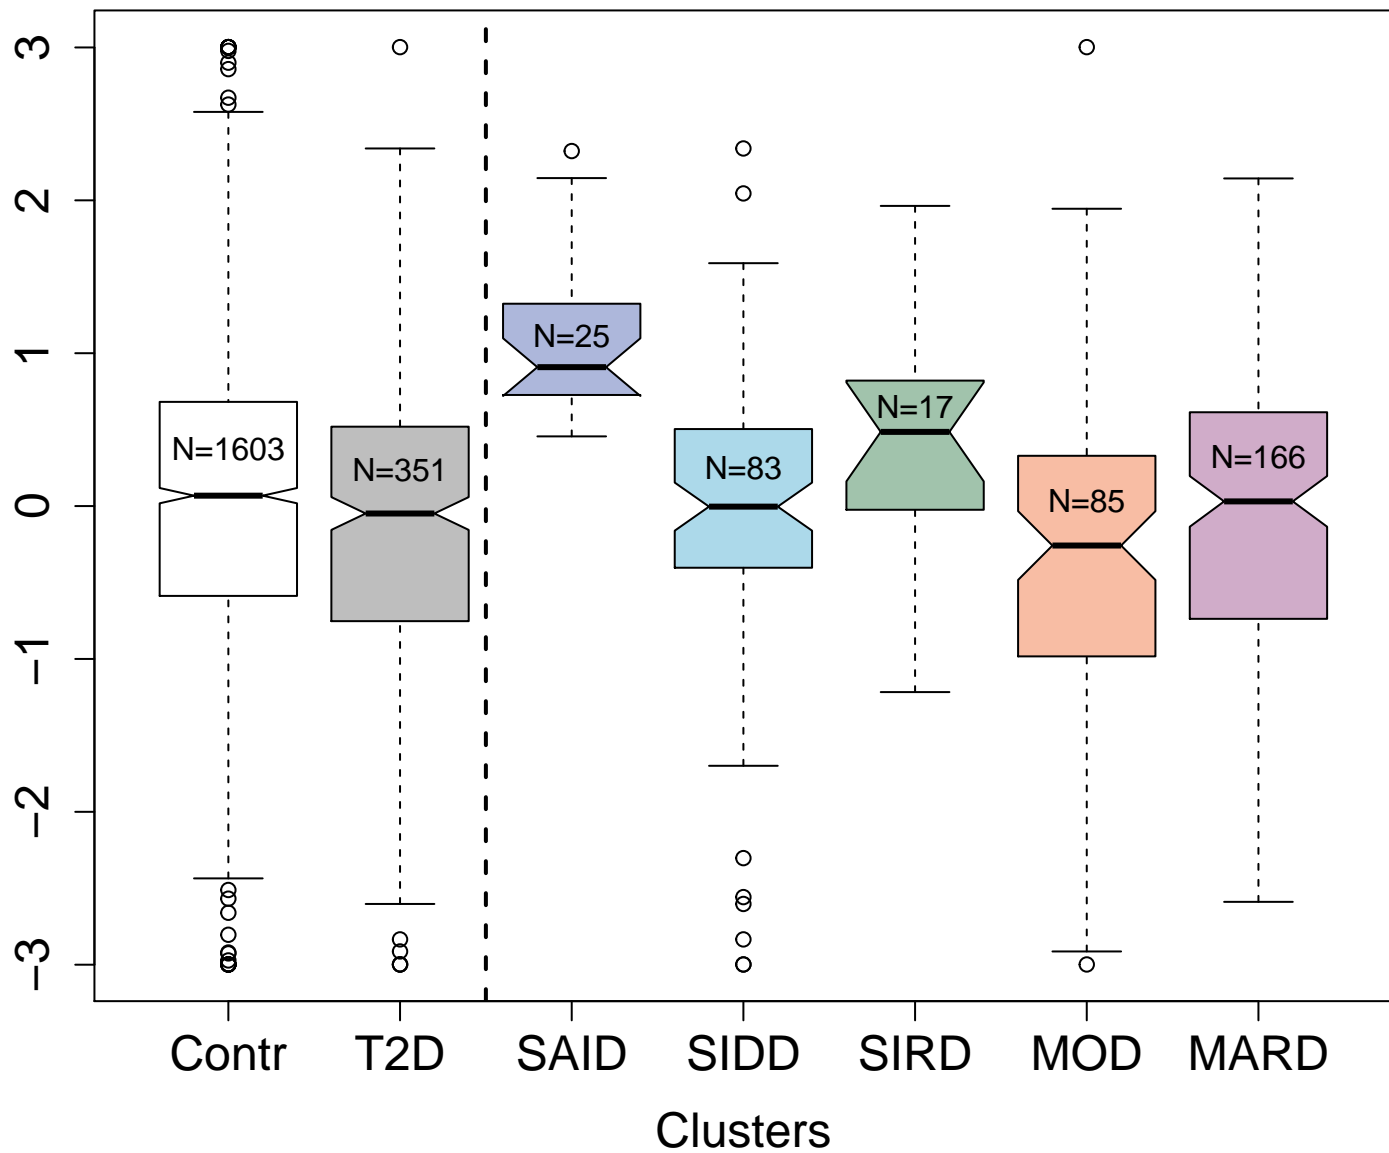

M3155 : 3-ureidopropionate

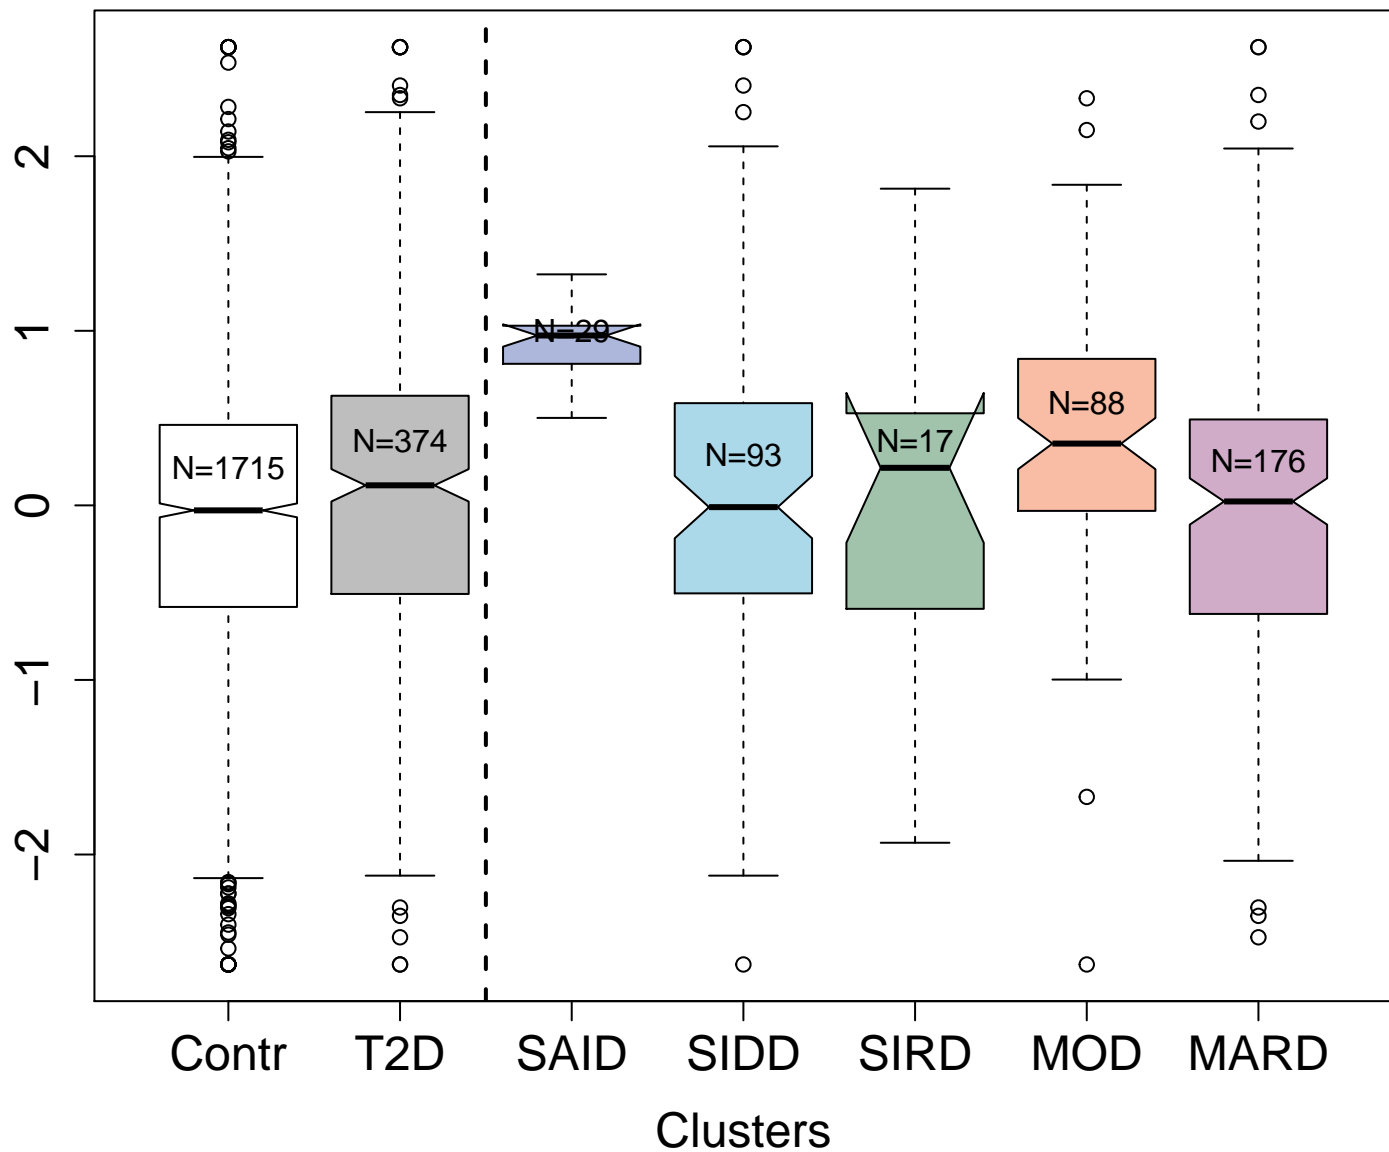



M52473 : gamma-tocopherol/beta-tocopherol

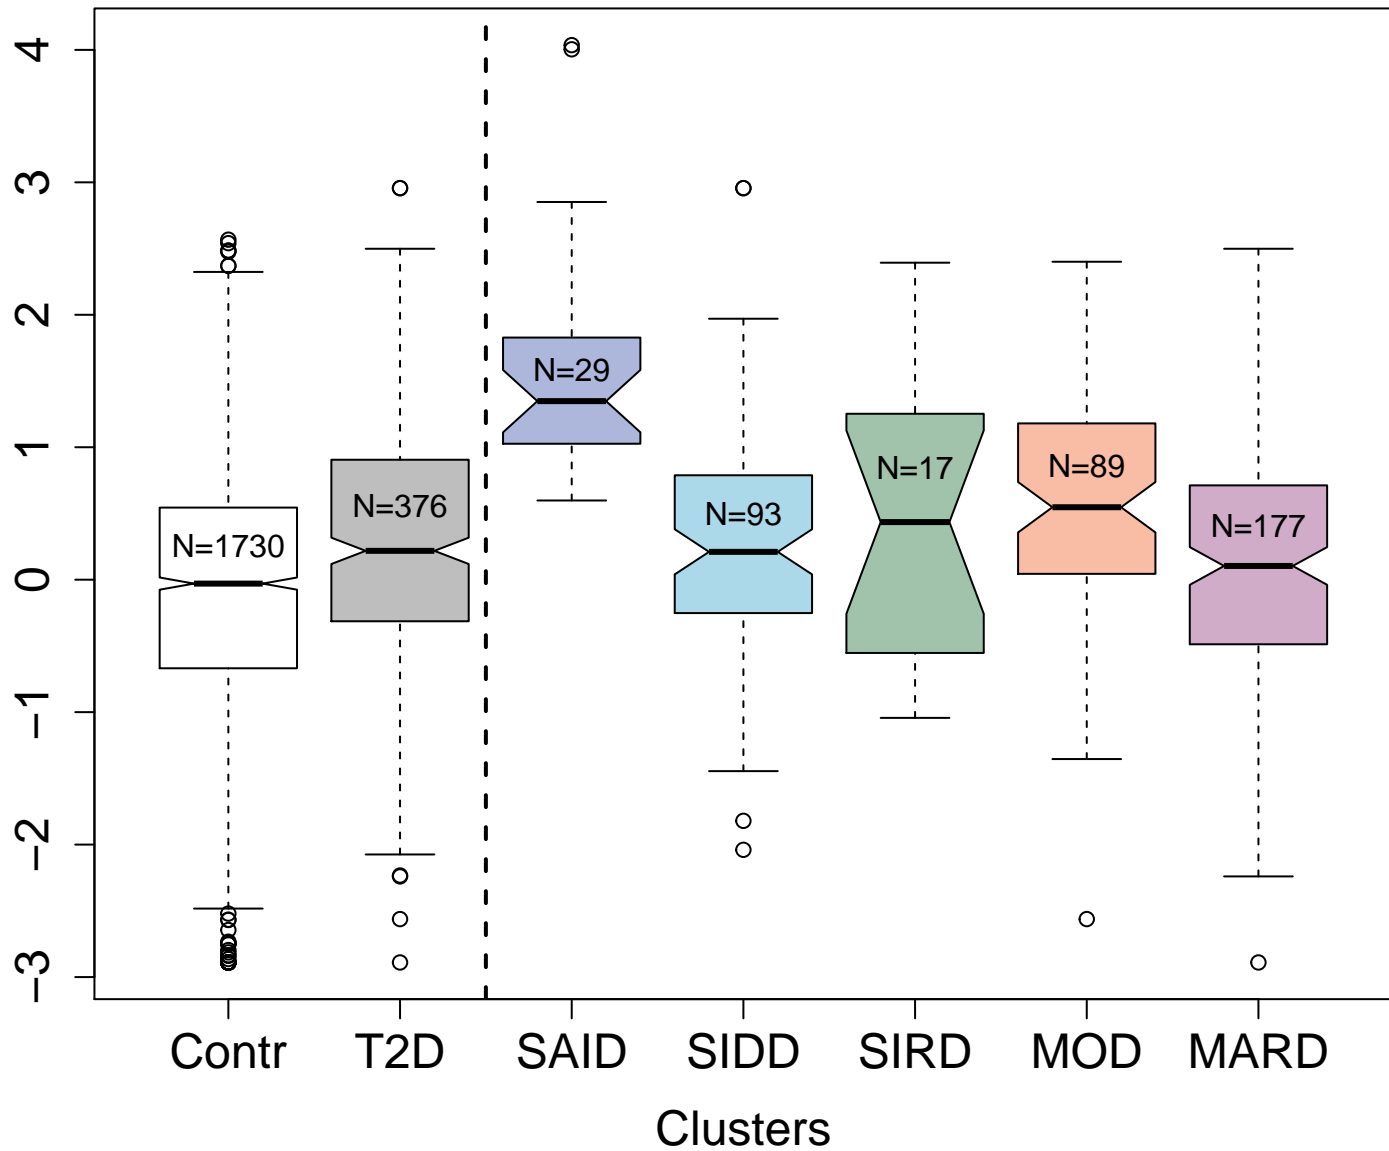

M62889 : taurodeoxycholic acid 3-sulfate

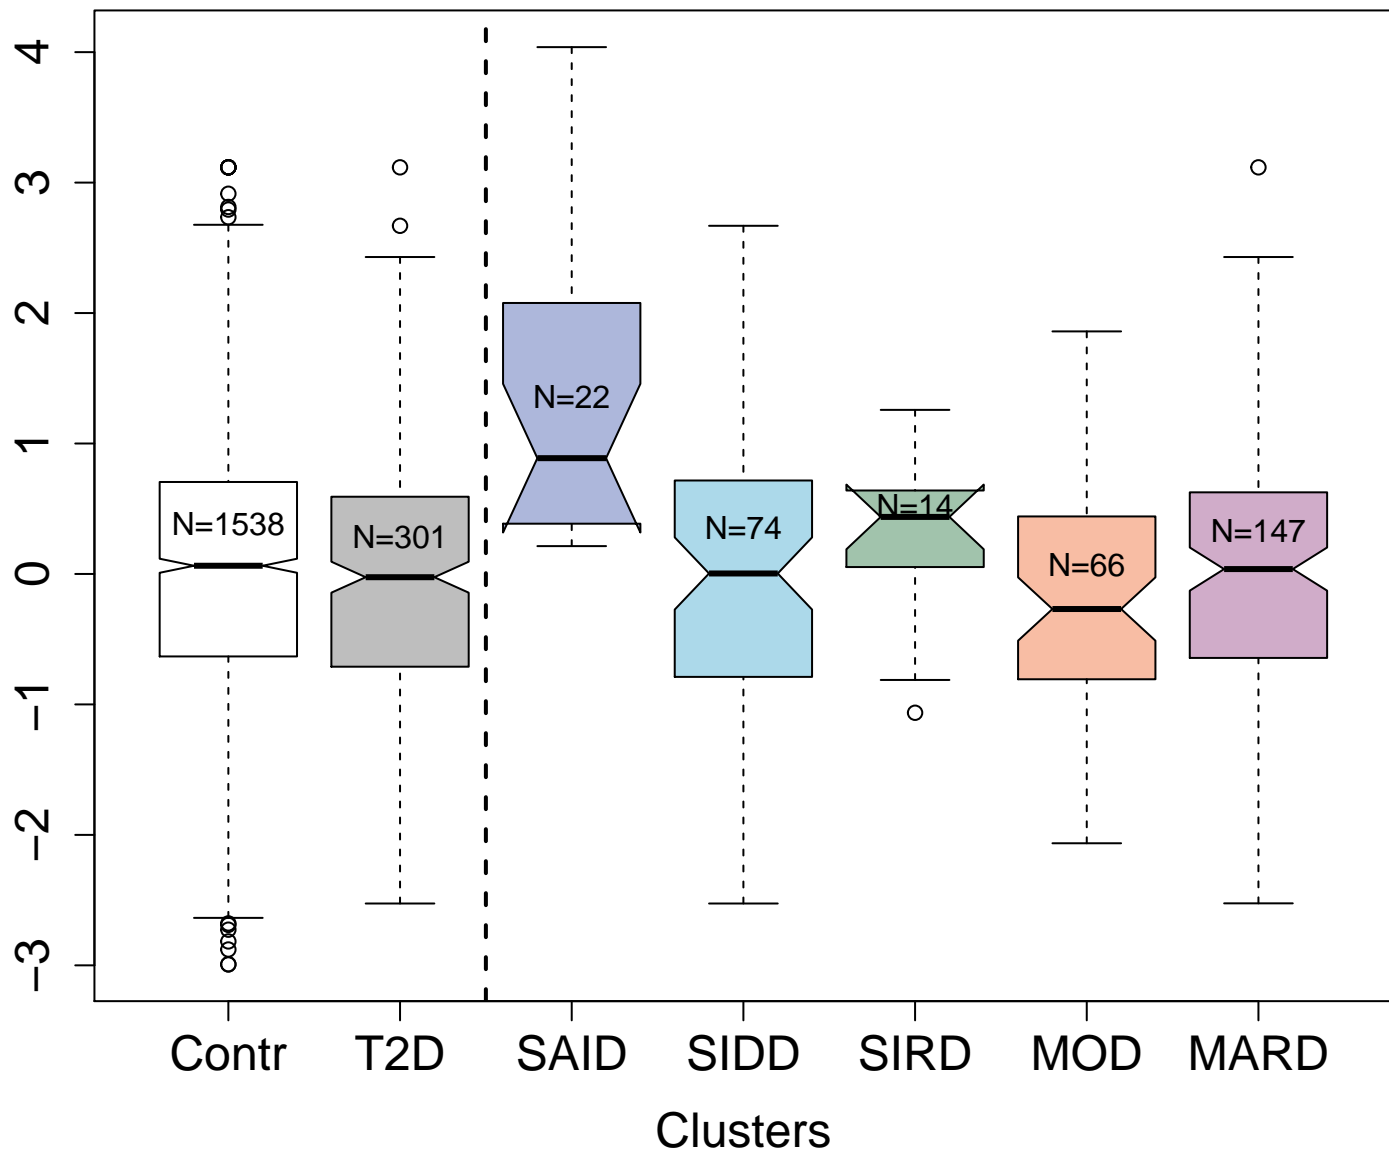

M15736 : 4-acetamidophenylglucuronide

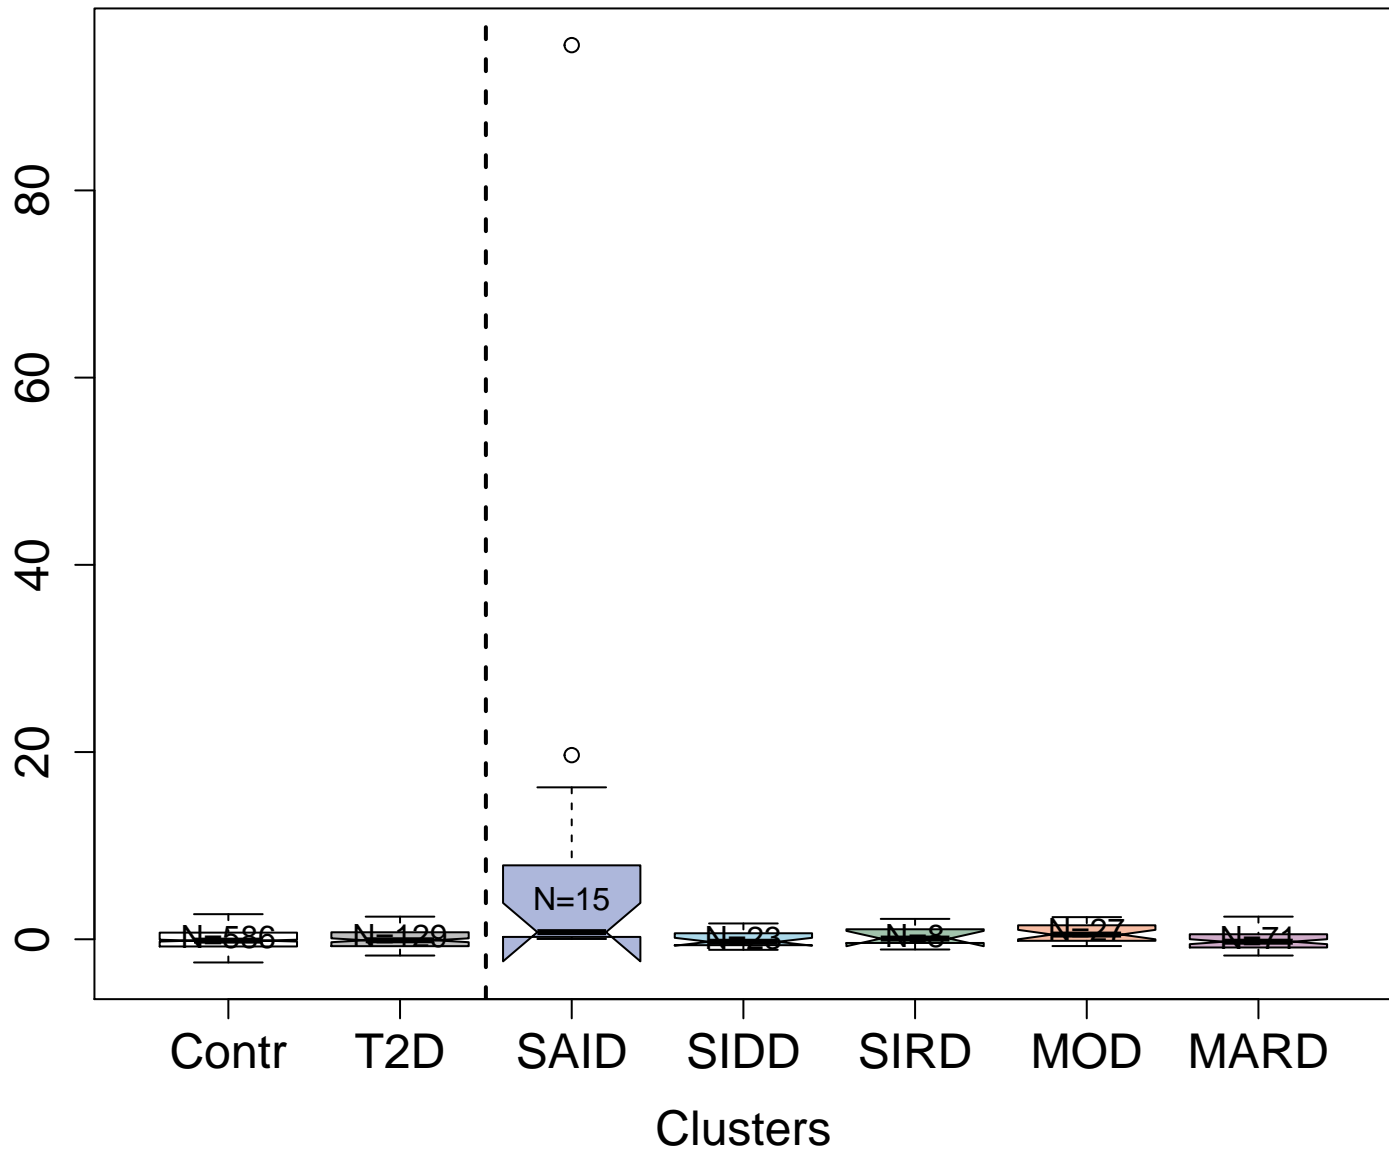

M34390 : 7-methylxanthine

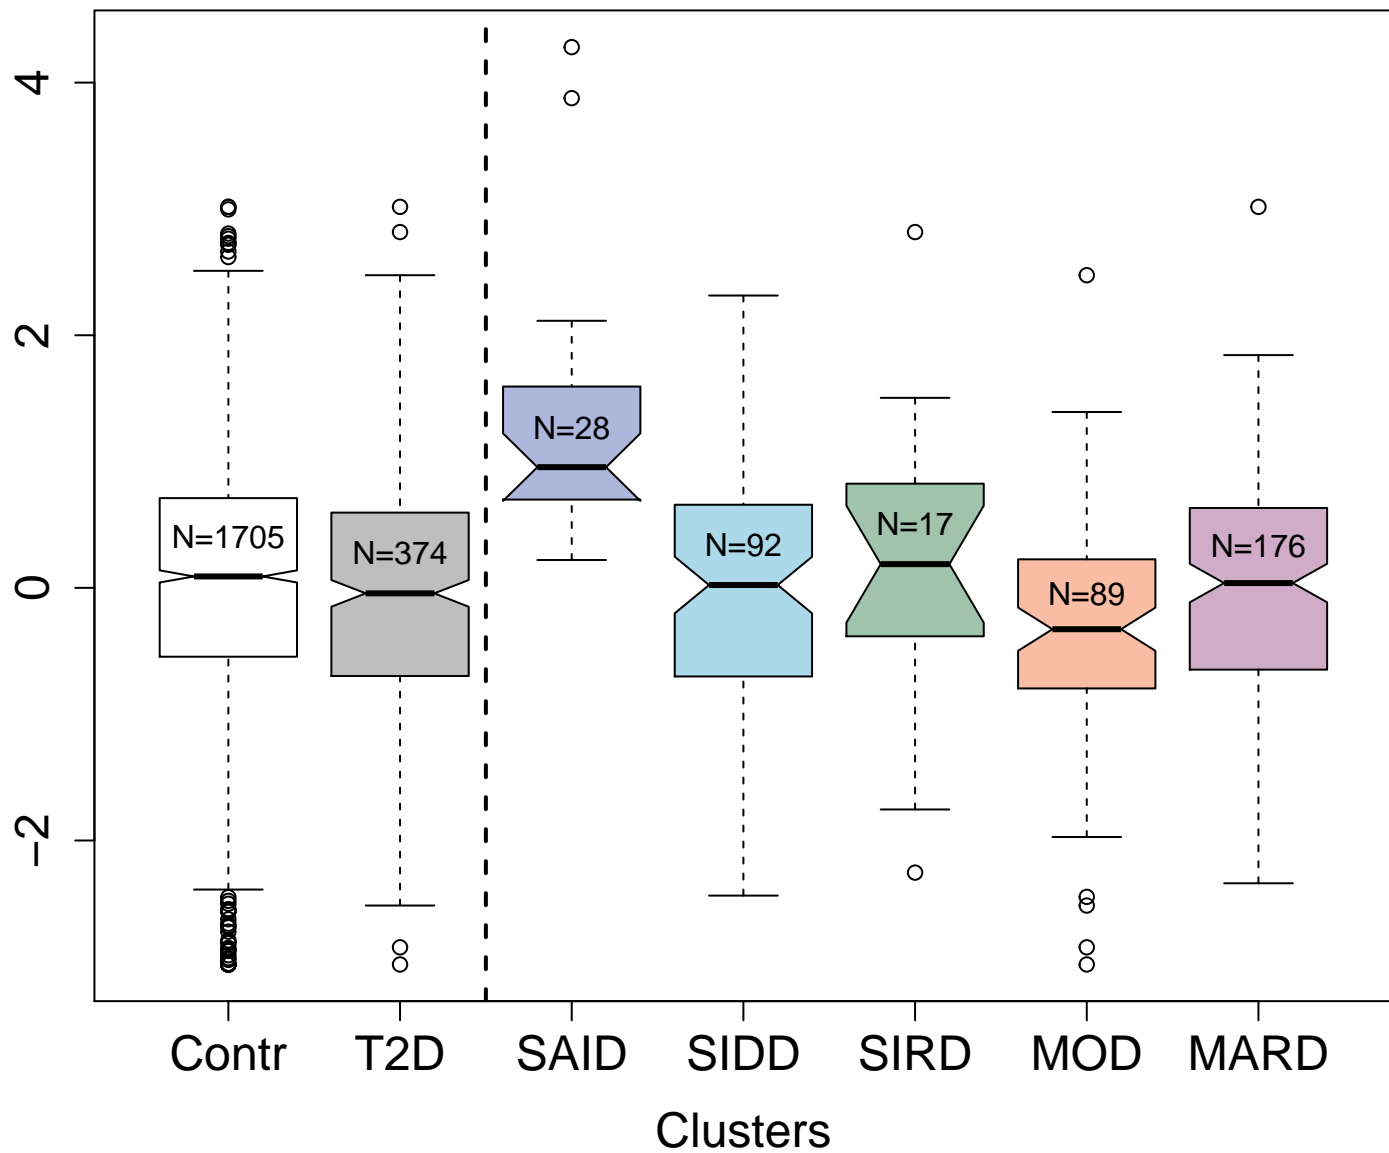

M46592 : X - 11299

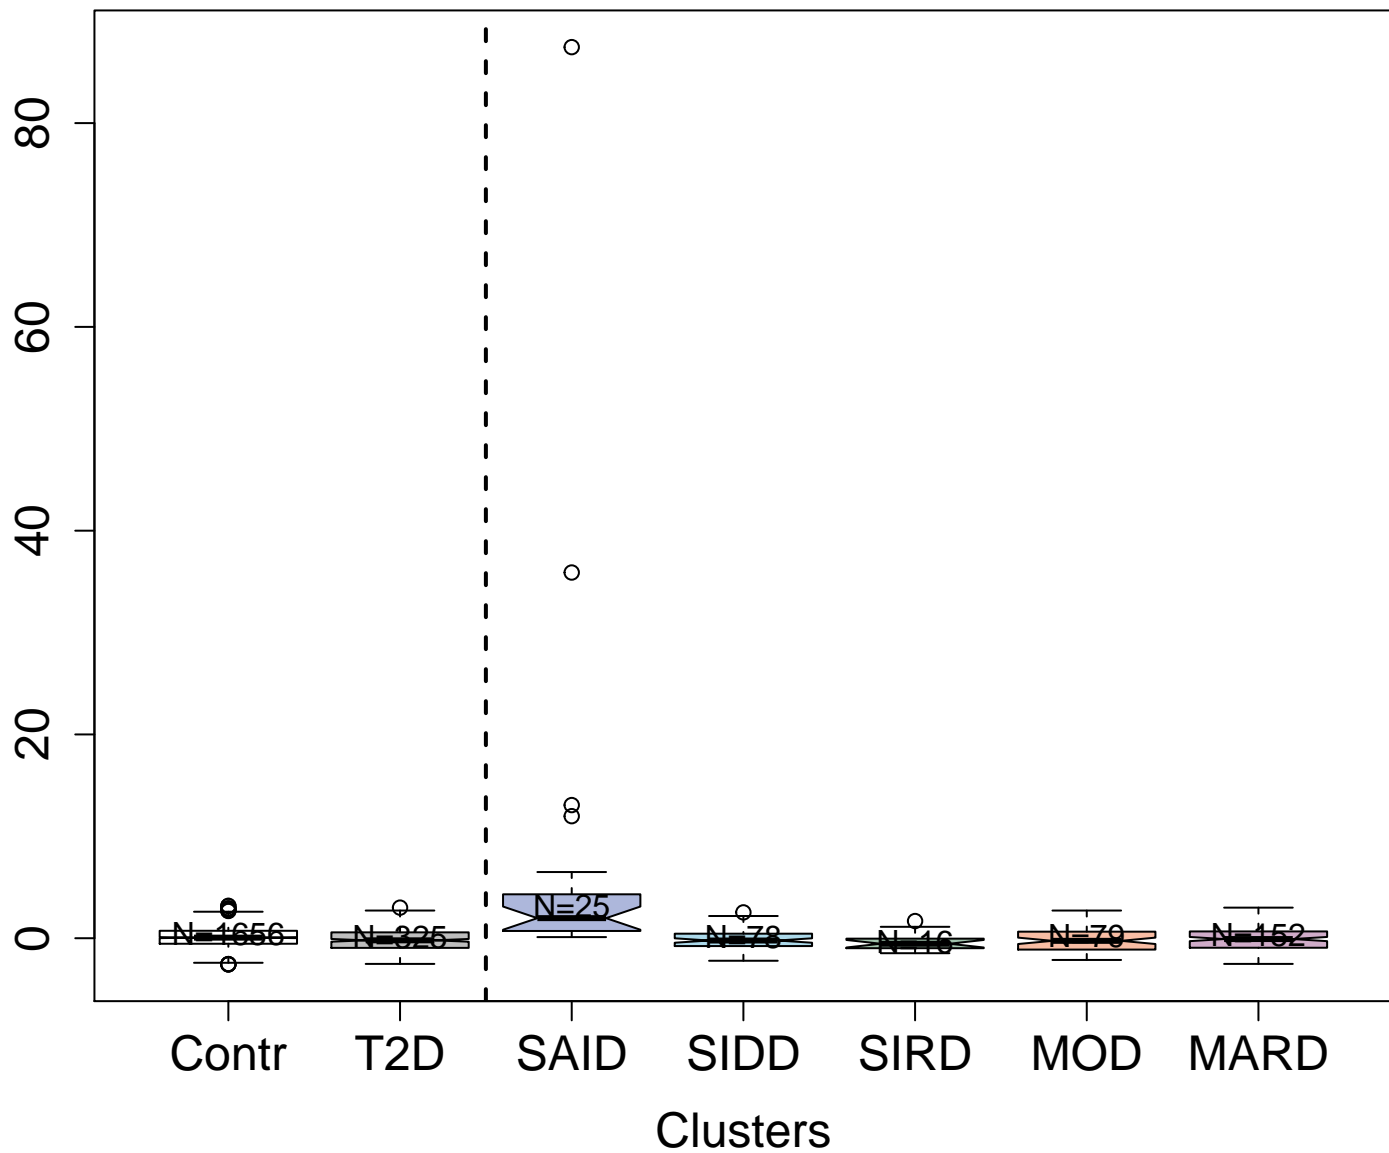

M46297 : 5-HEPE

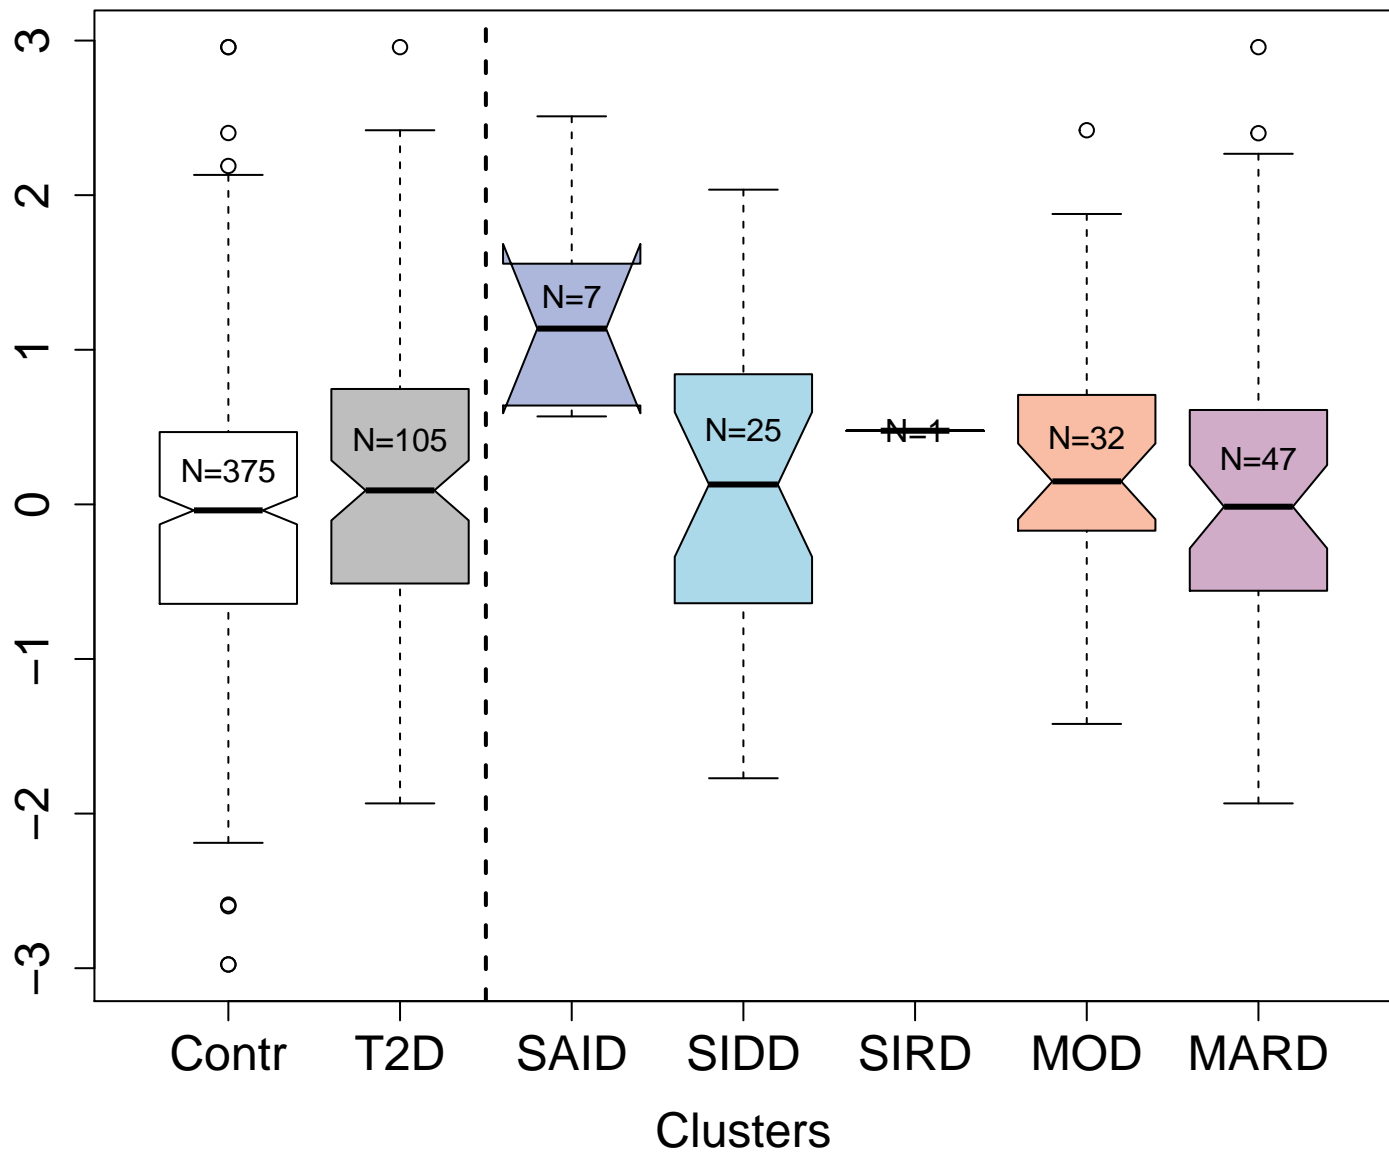

M62937 : X - 25503

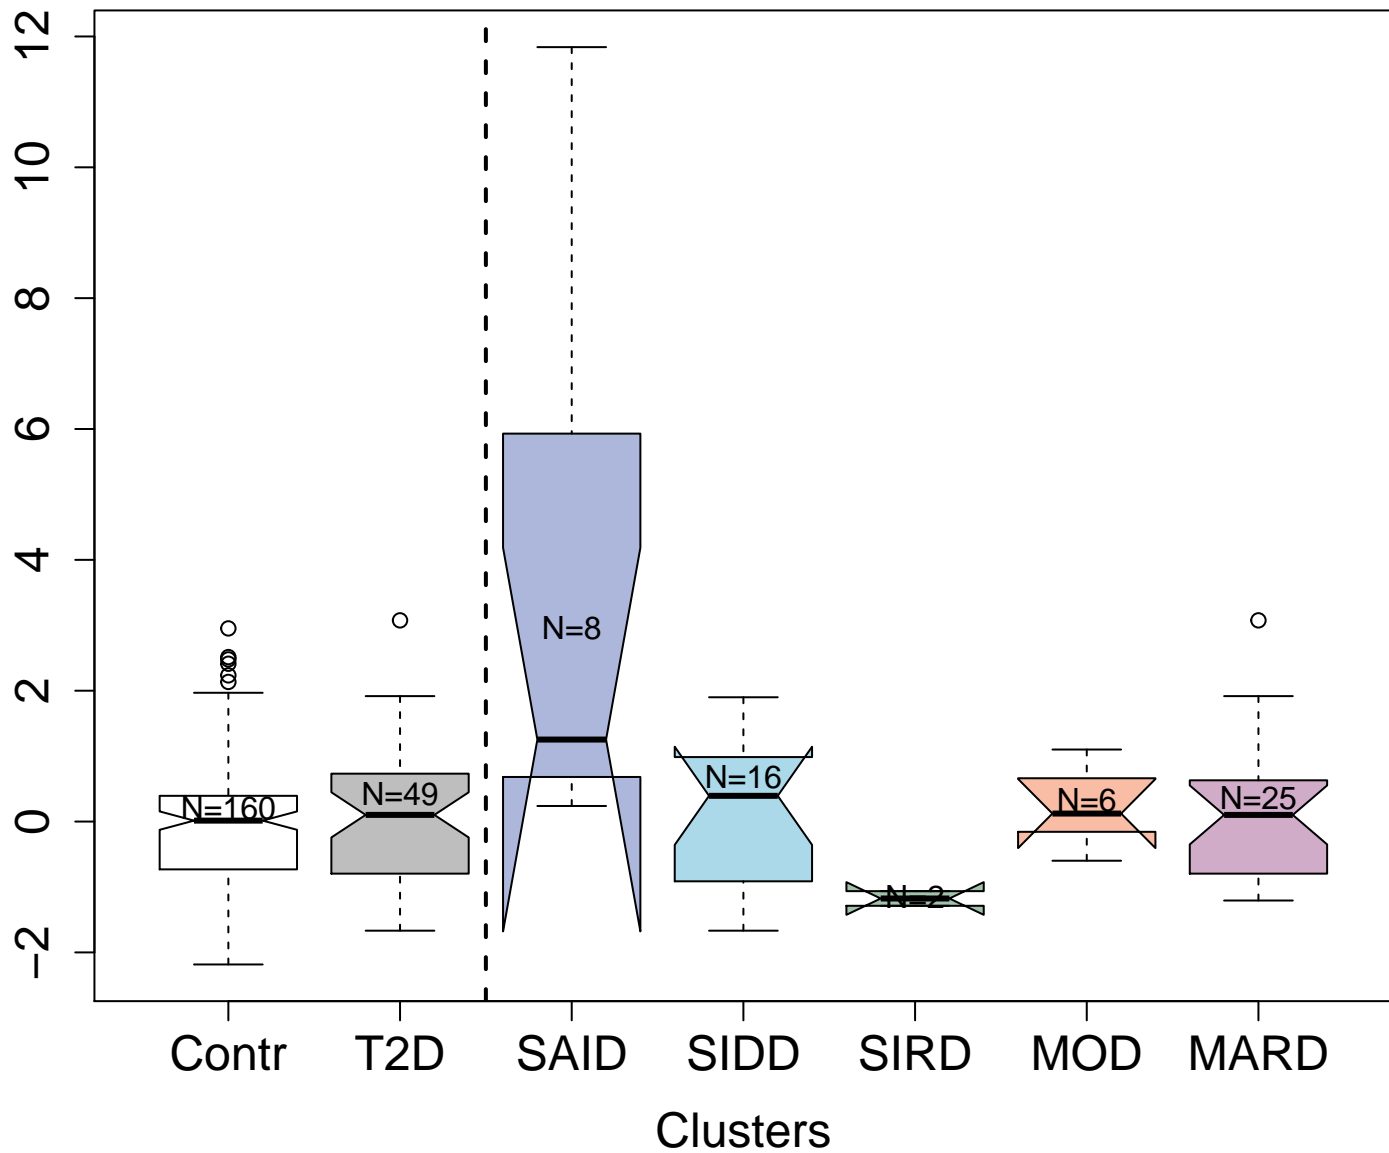

M62309 : N-acetyl-isoptreanine

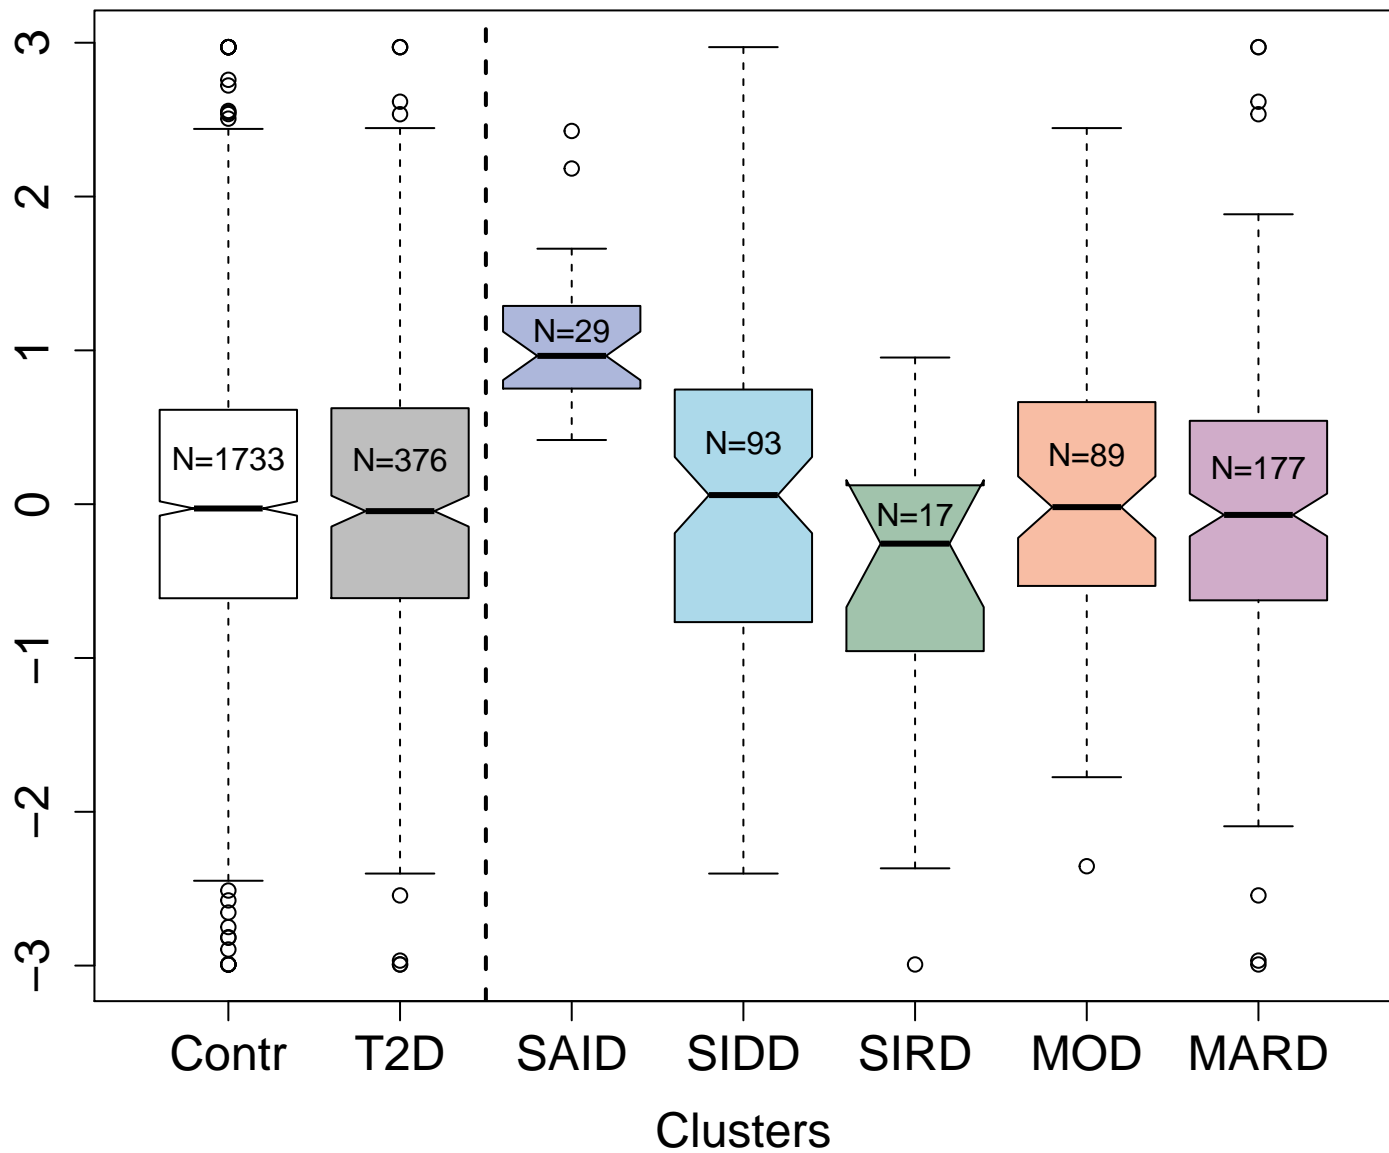



M62862 : N6,N6-dimethyllysine

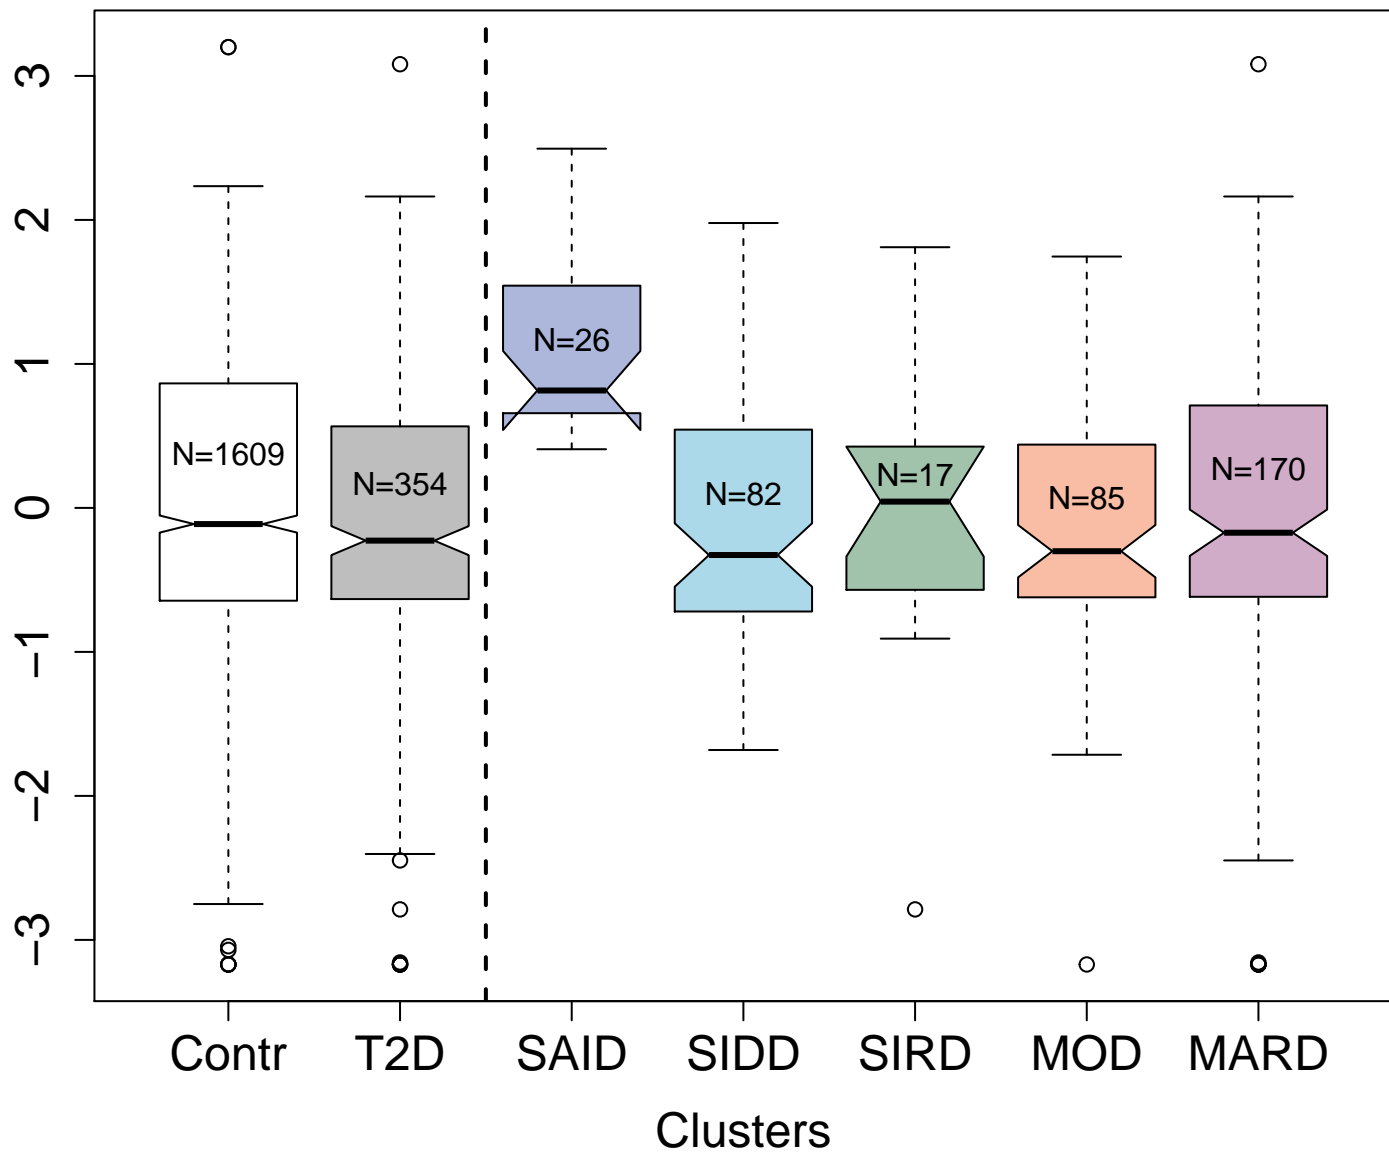

M37482 : 17alpha-hydroxypregnenolone 3-sulfate

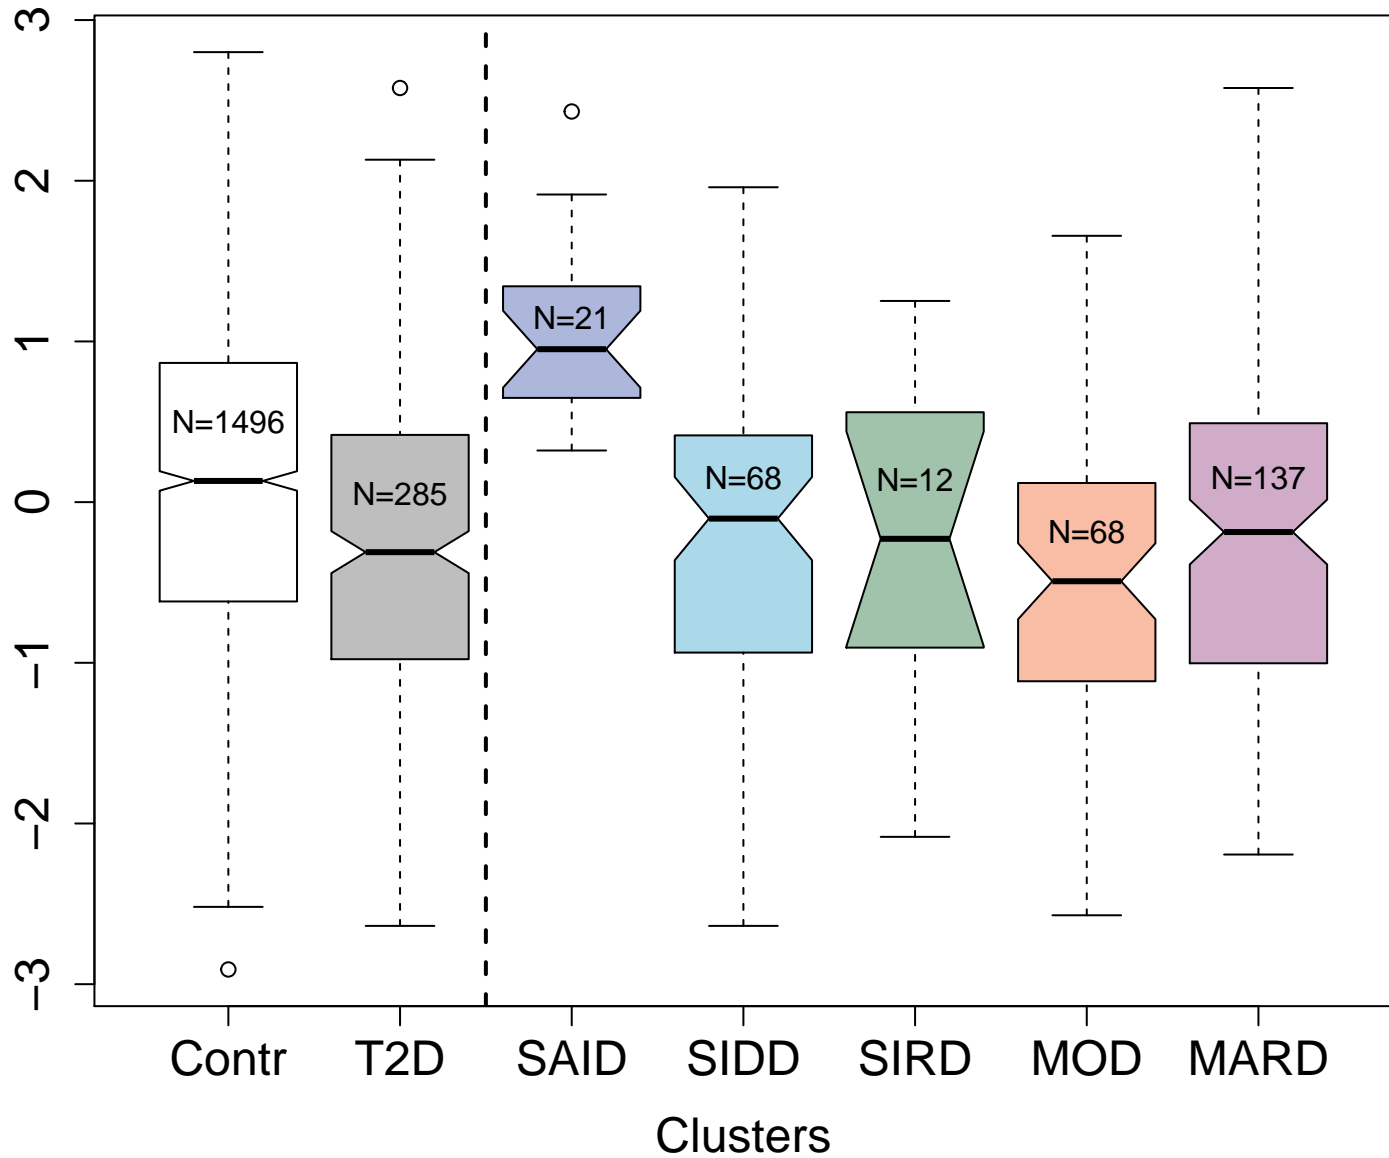

M34093 : hyochoolate

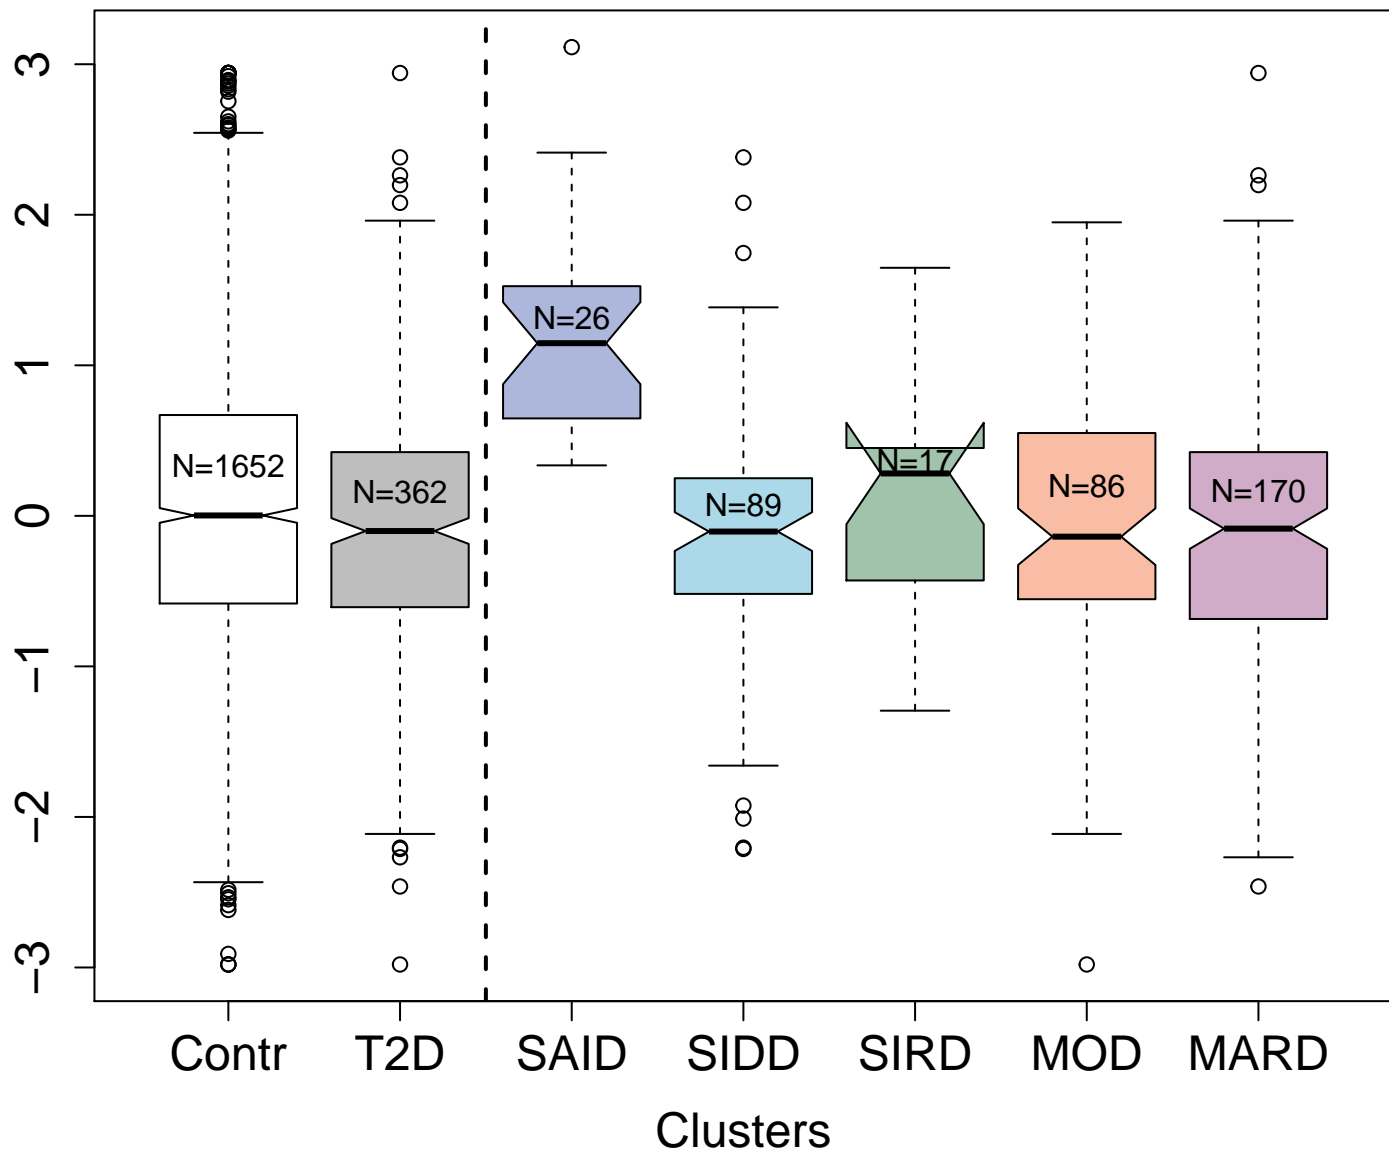

M46490 : X - 17185

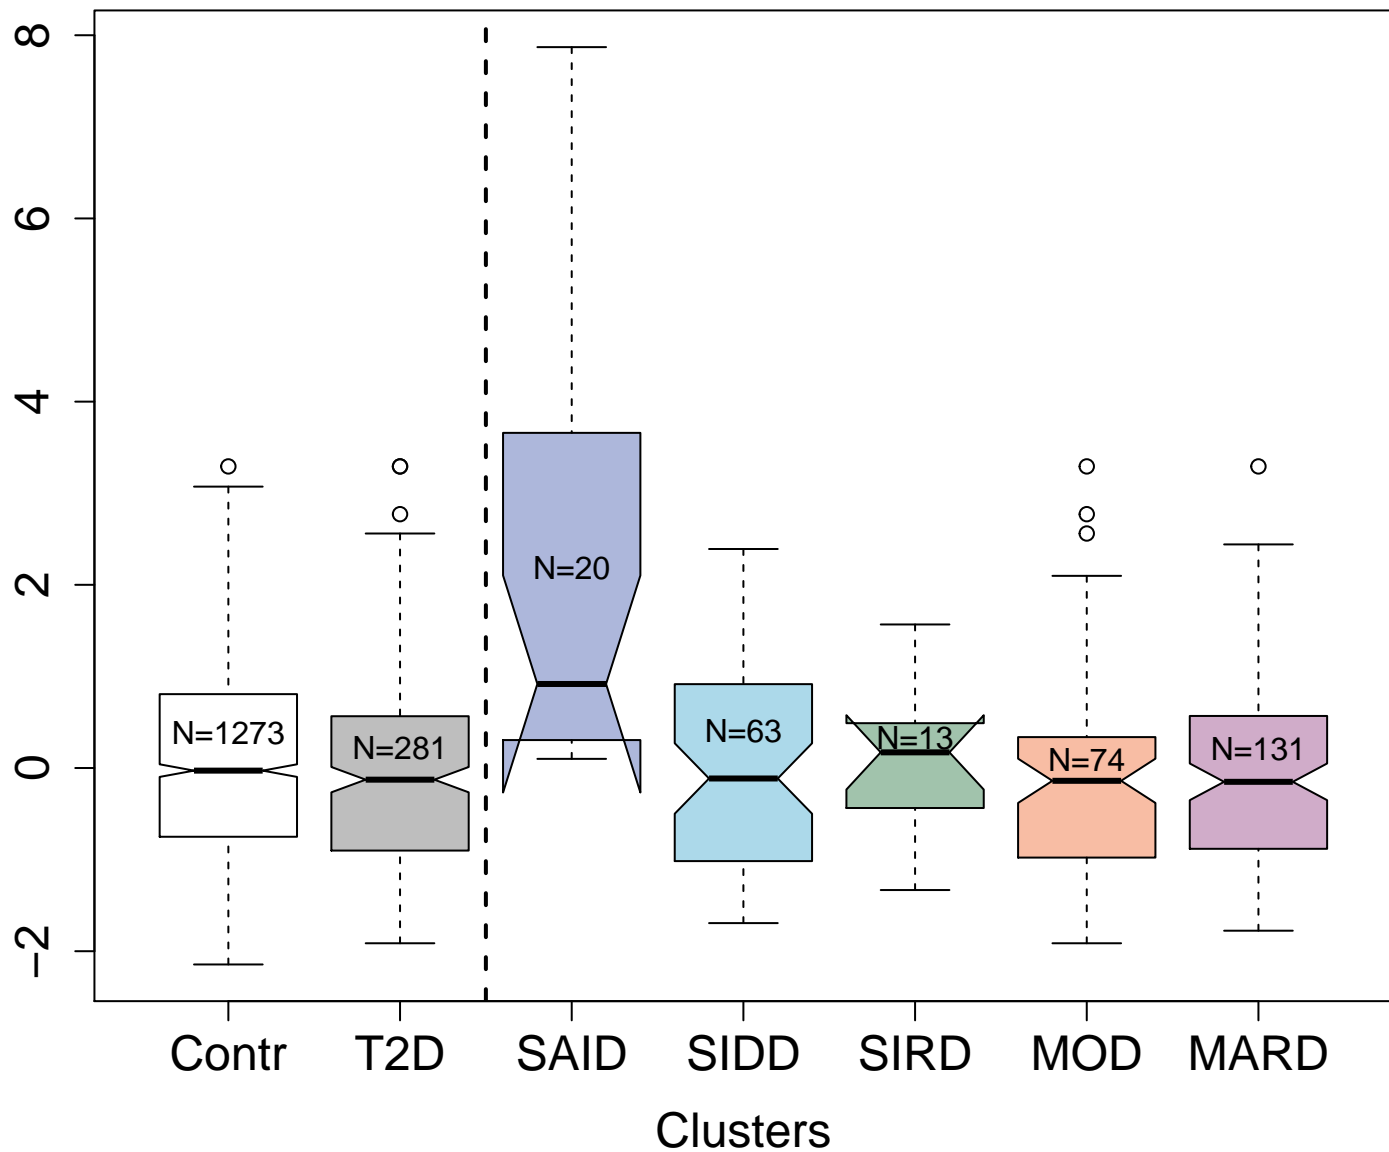

M38116 : indole-3-carboxylate

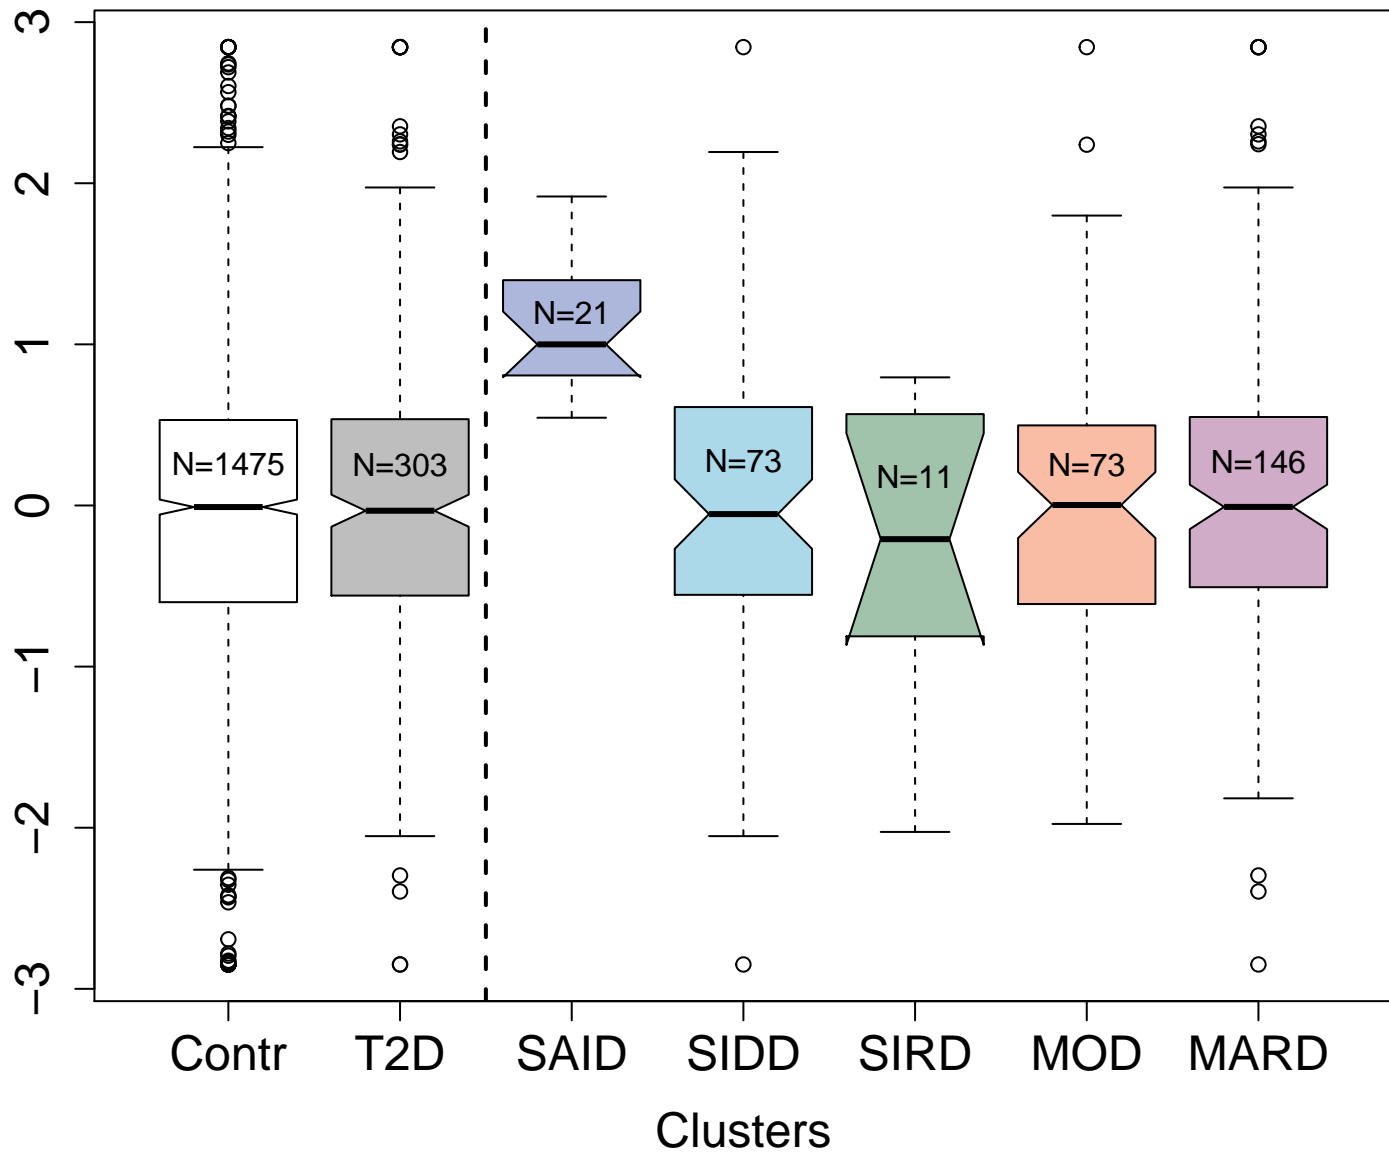

M38178 : cis-4-decenoylcarnitine (C10:1)

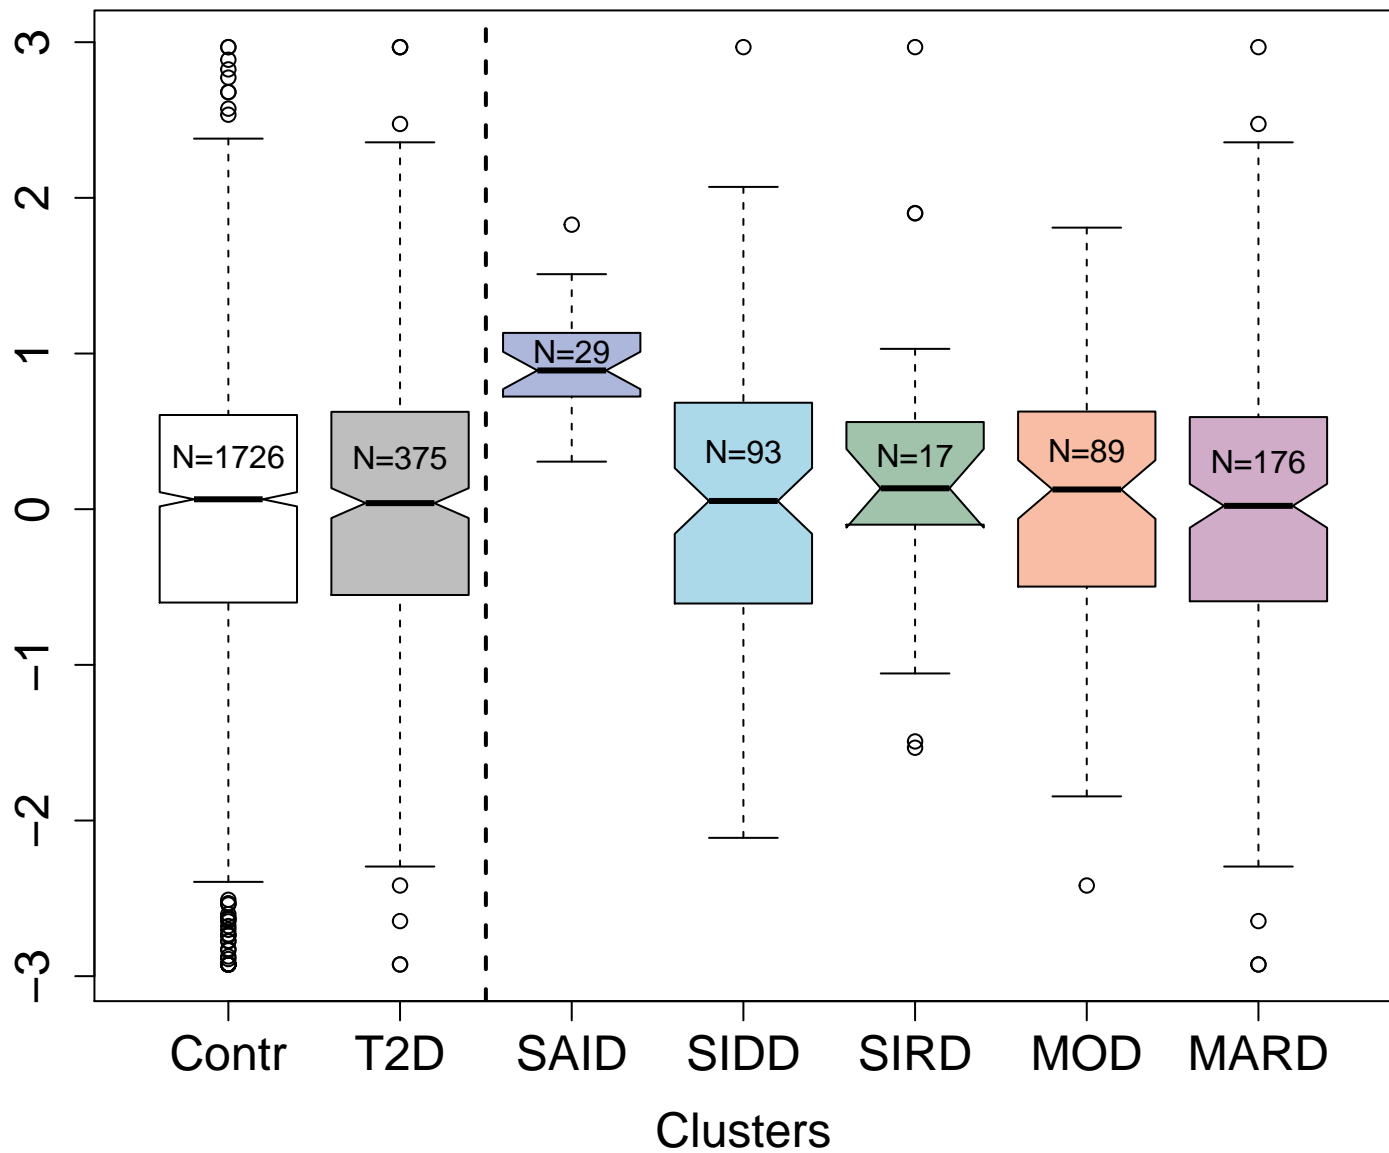

M53010 : lactosyl-N-palmitoyl-sphingosine (d18:1/16:0)

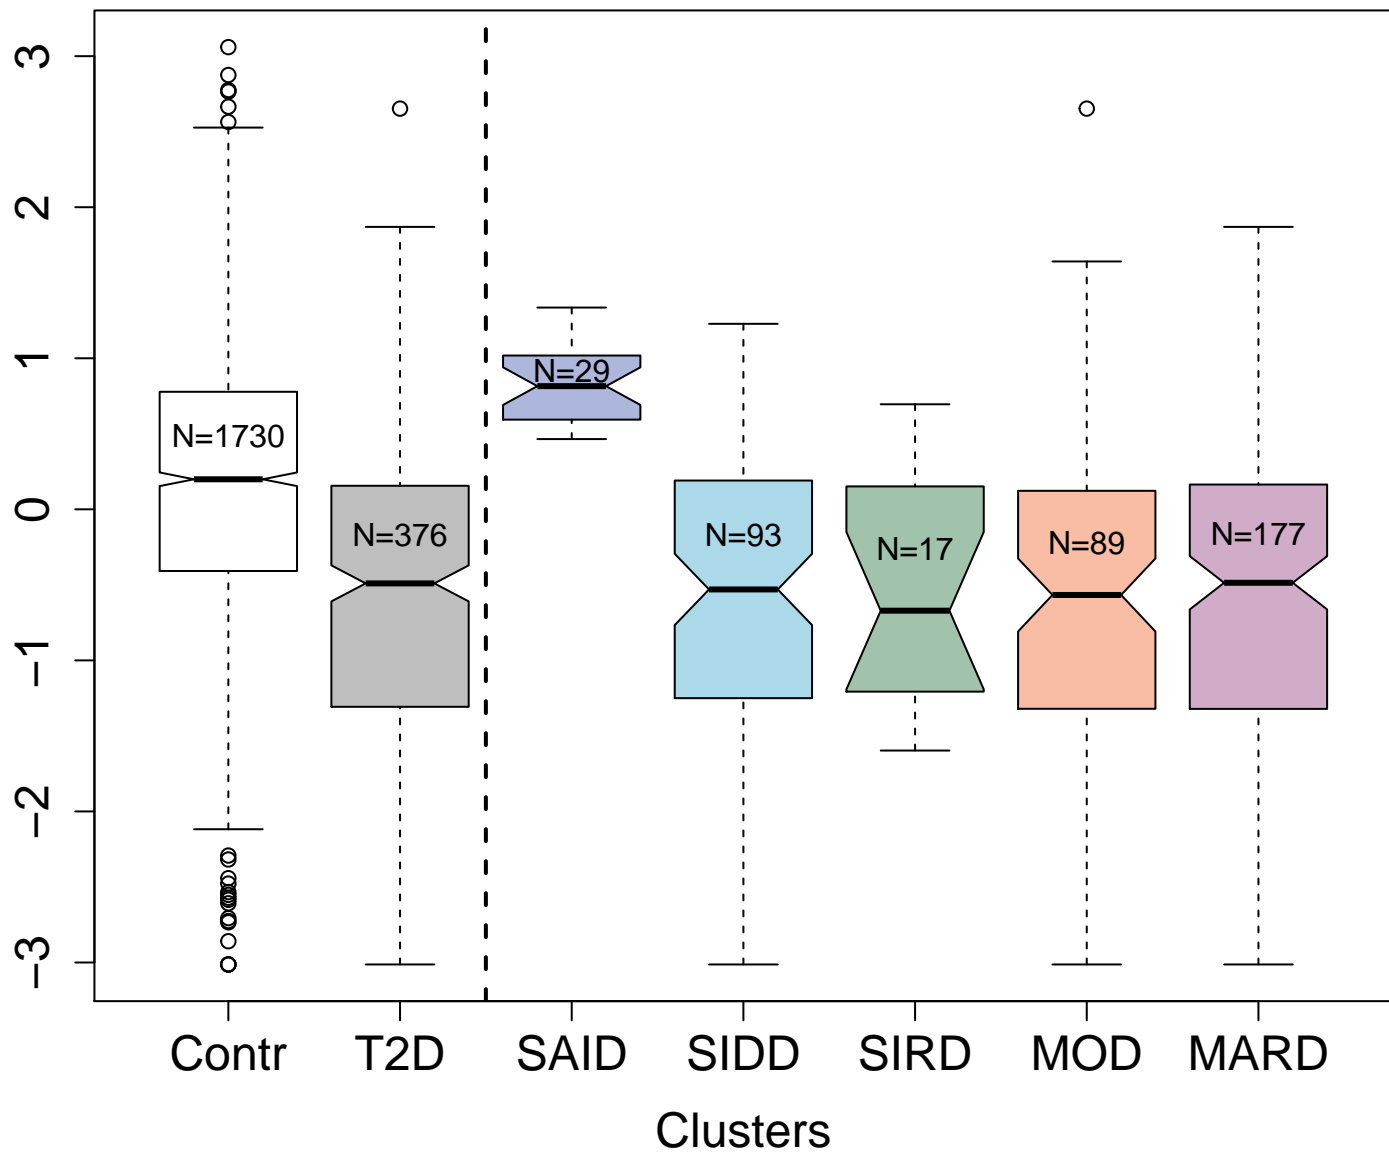

M62714 : X - 25417

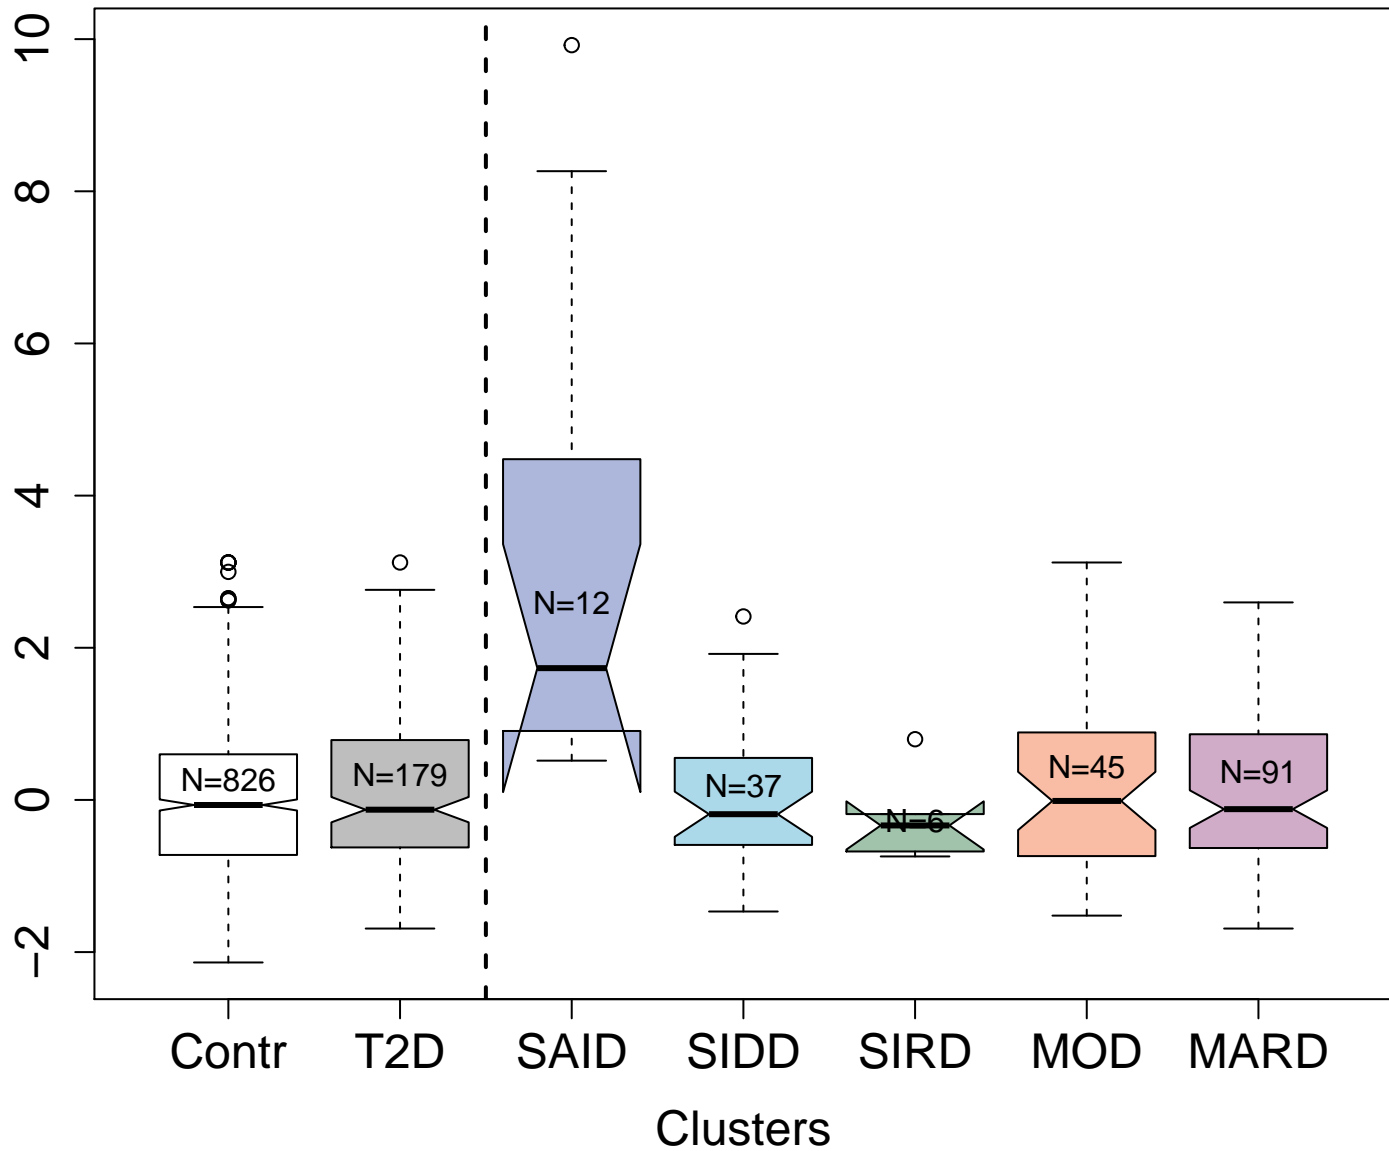



M57745 : phenylacetate

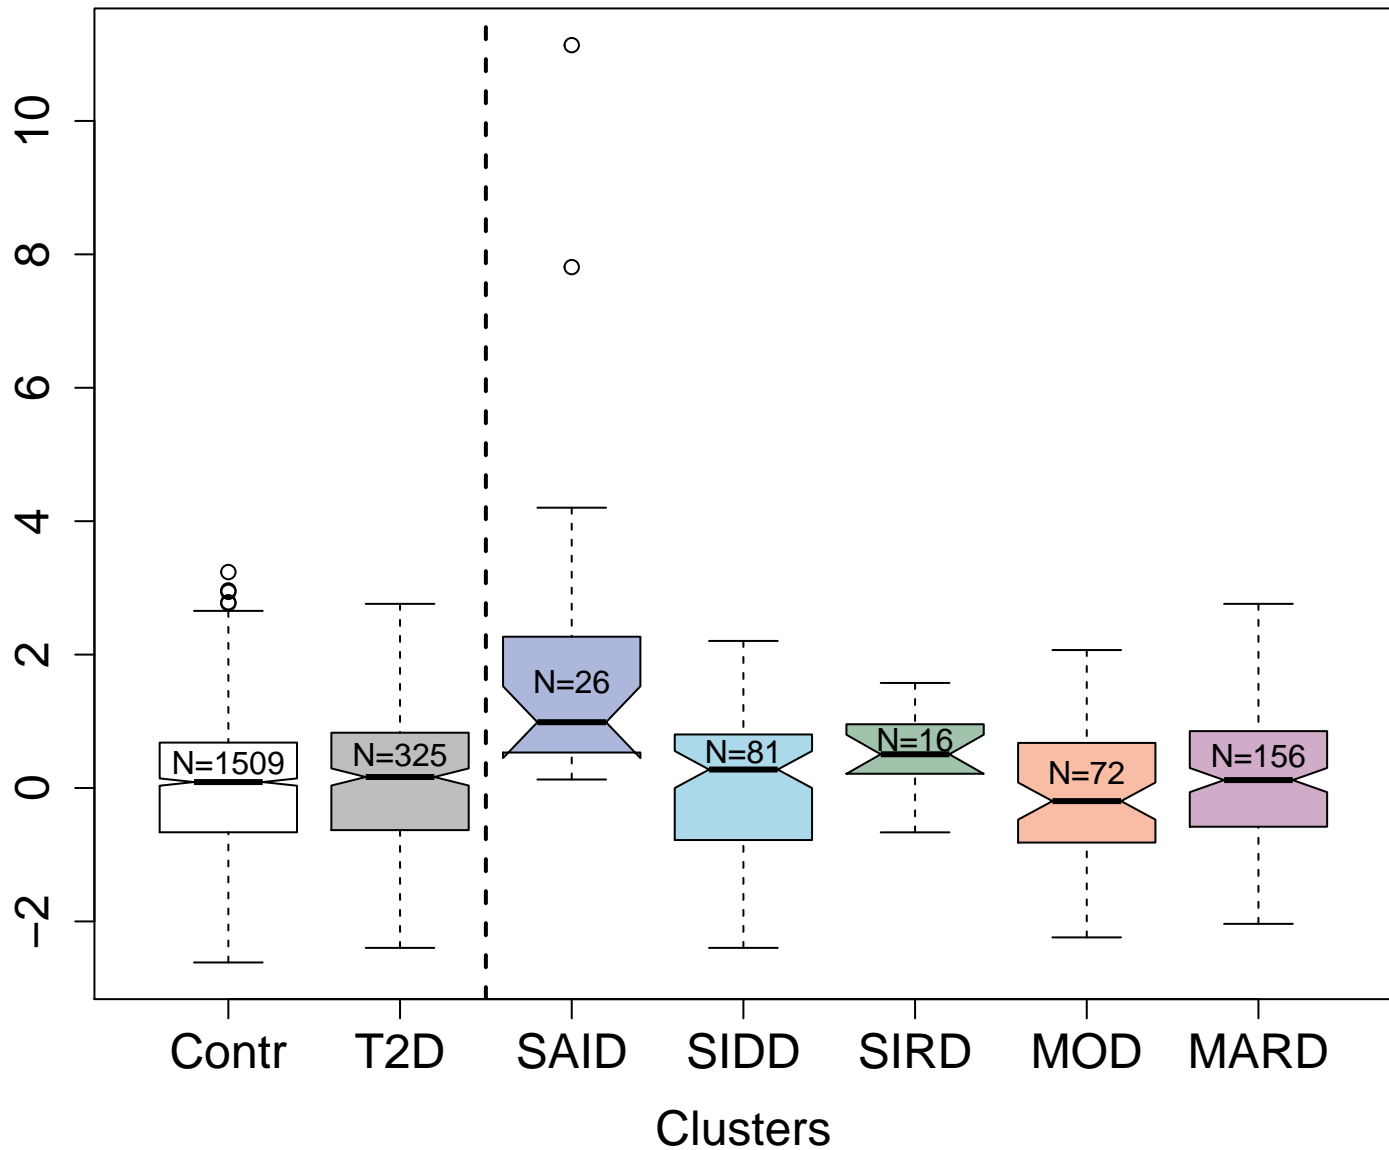

M52636 : X - 24422

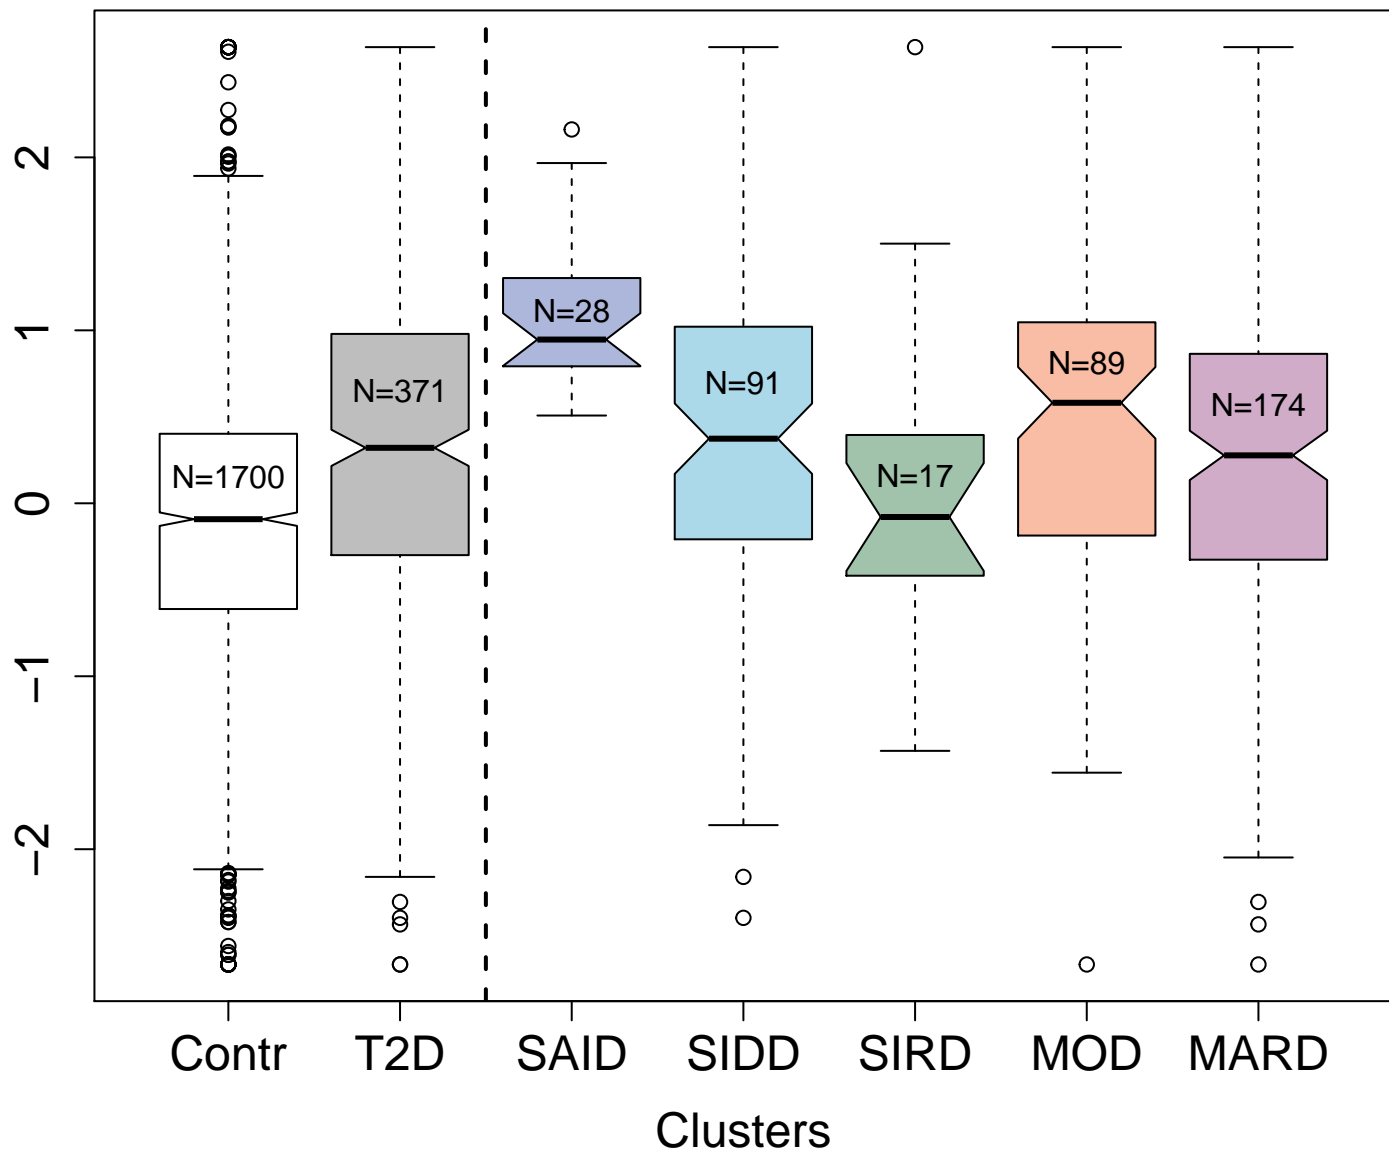

M63657 : glutamine conjugate of C6H10O2 (1)\*

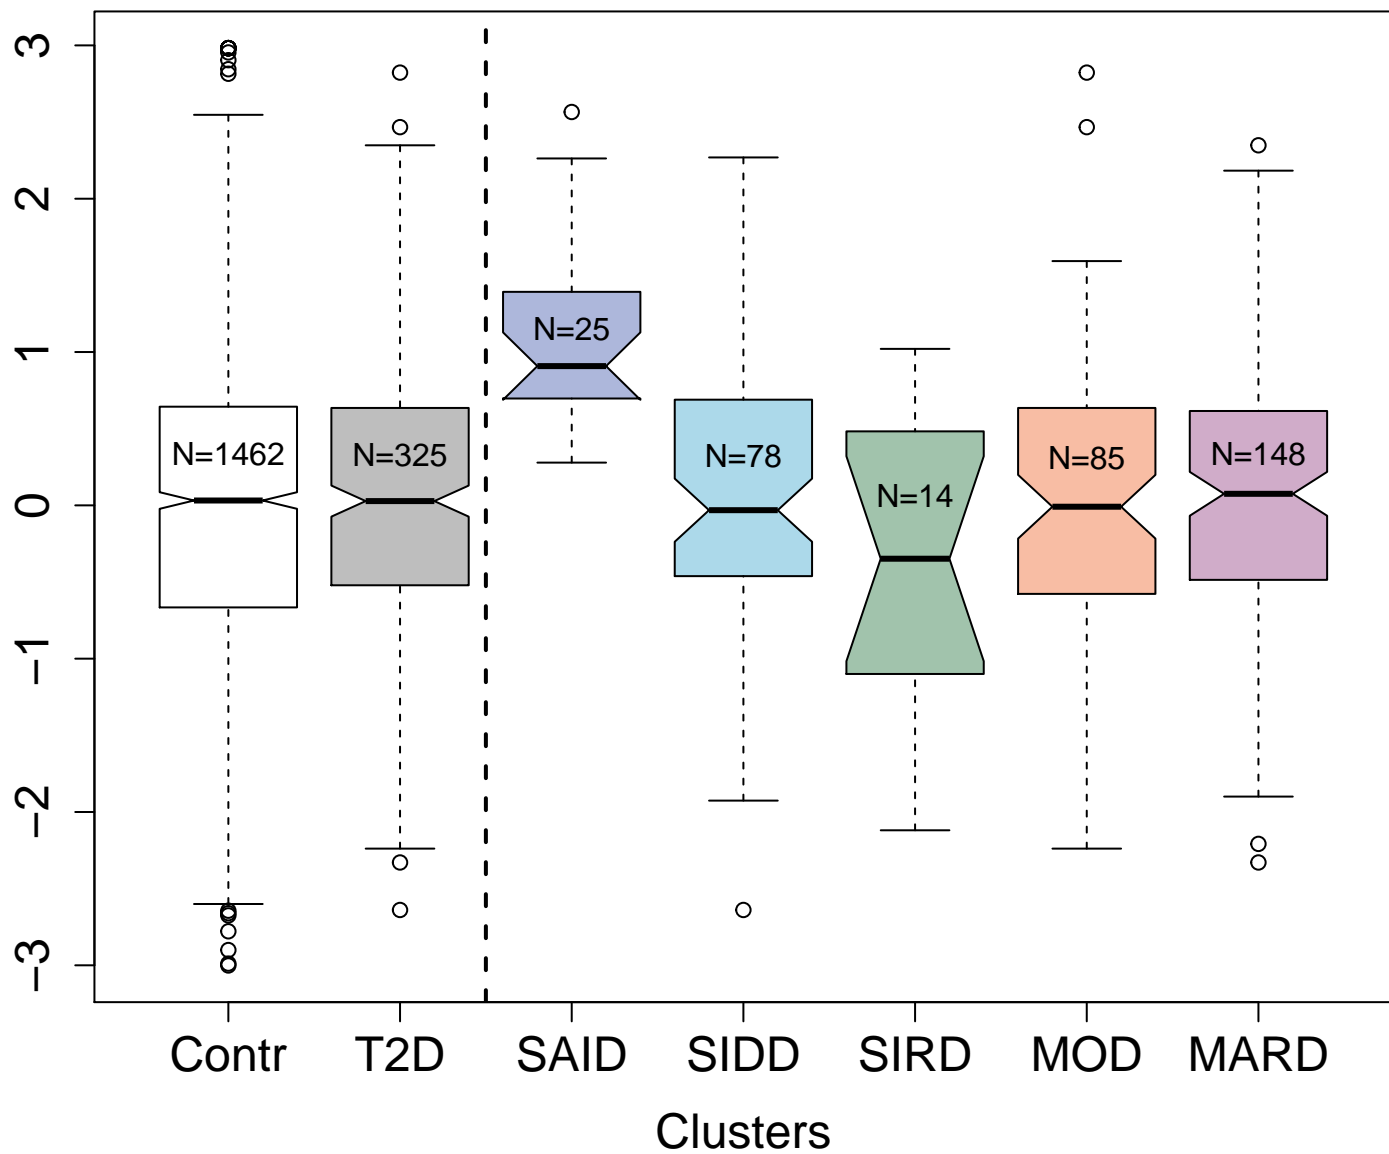

M63613 : undecenoylcarnitine (C11:1)

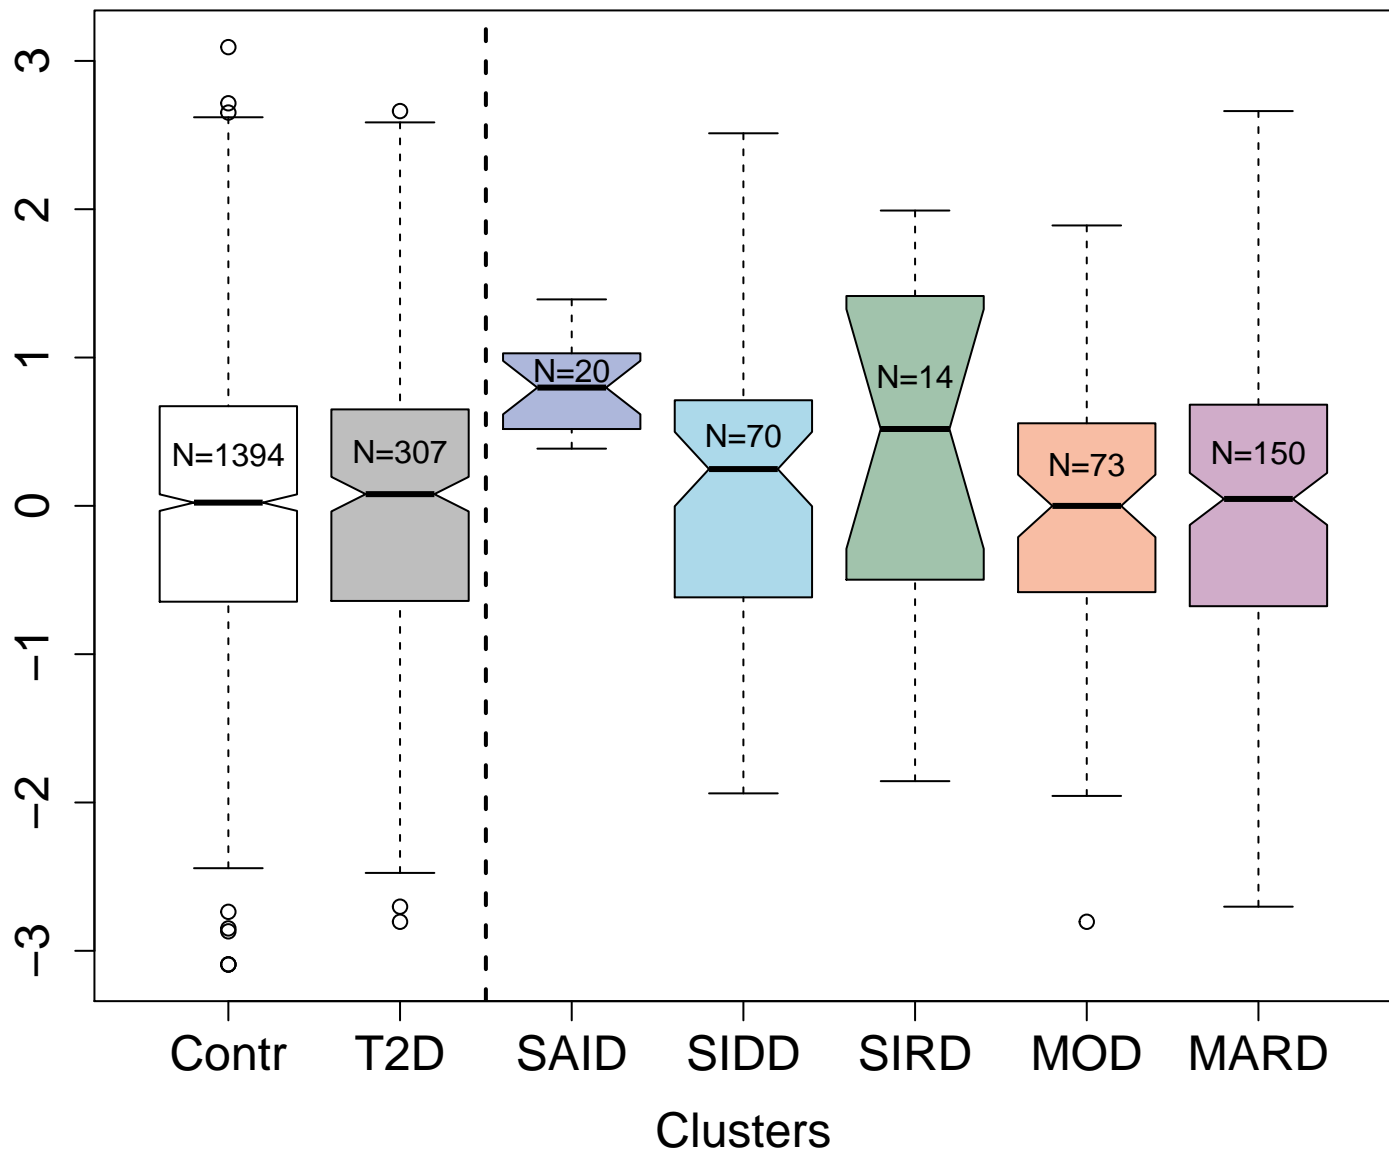

M61874 : glucuronide of C12H22O4 (1)\*

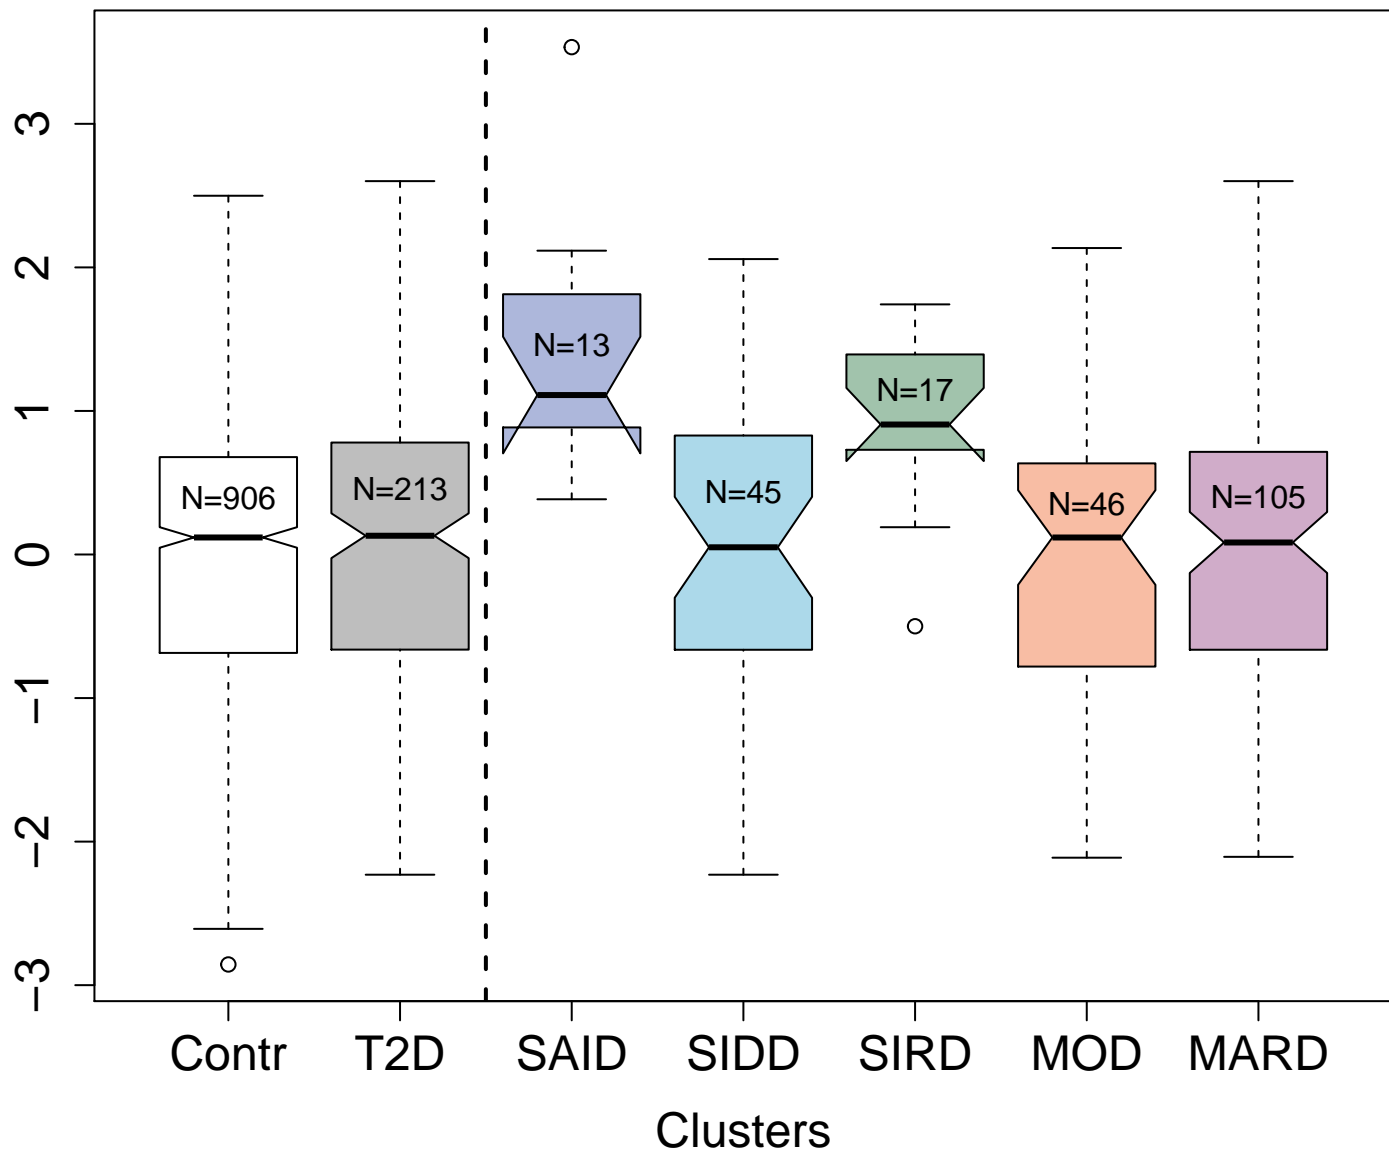

M33983 : tauro-beta-muricholate

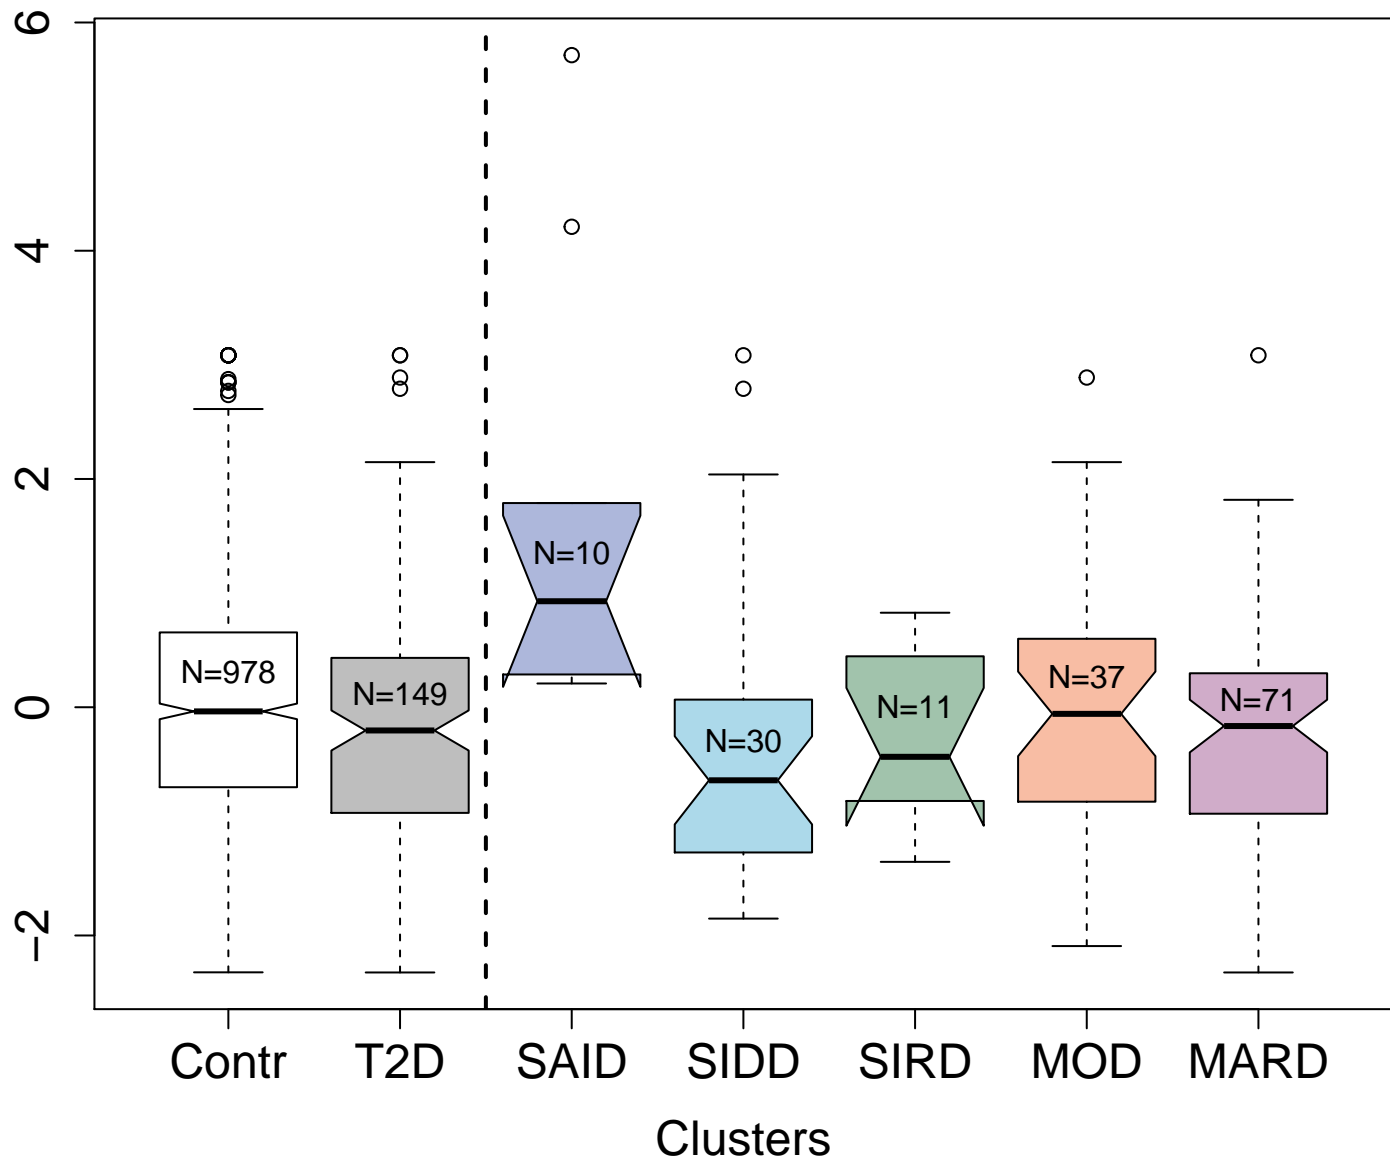

M57718 : X - 24951

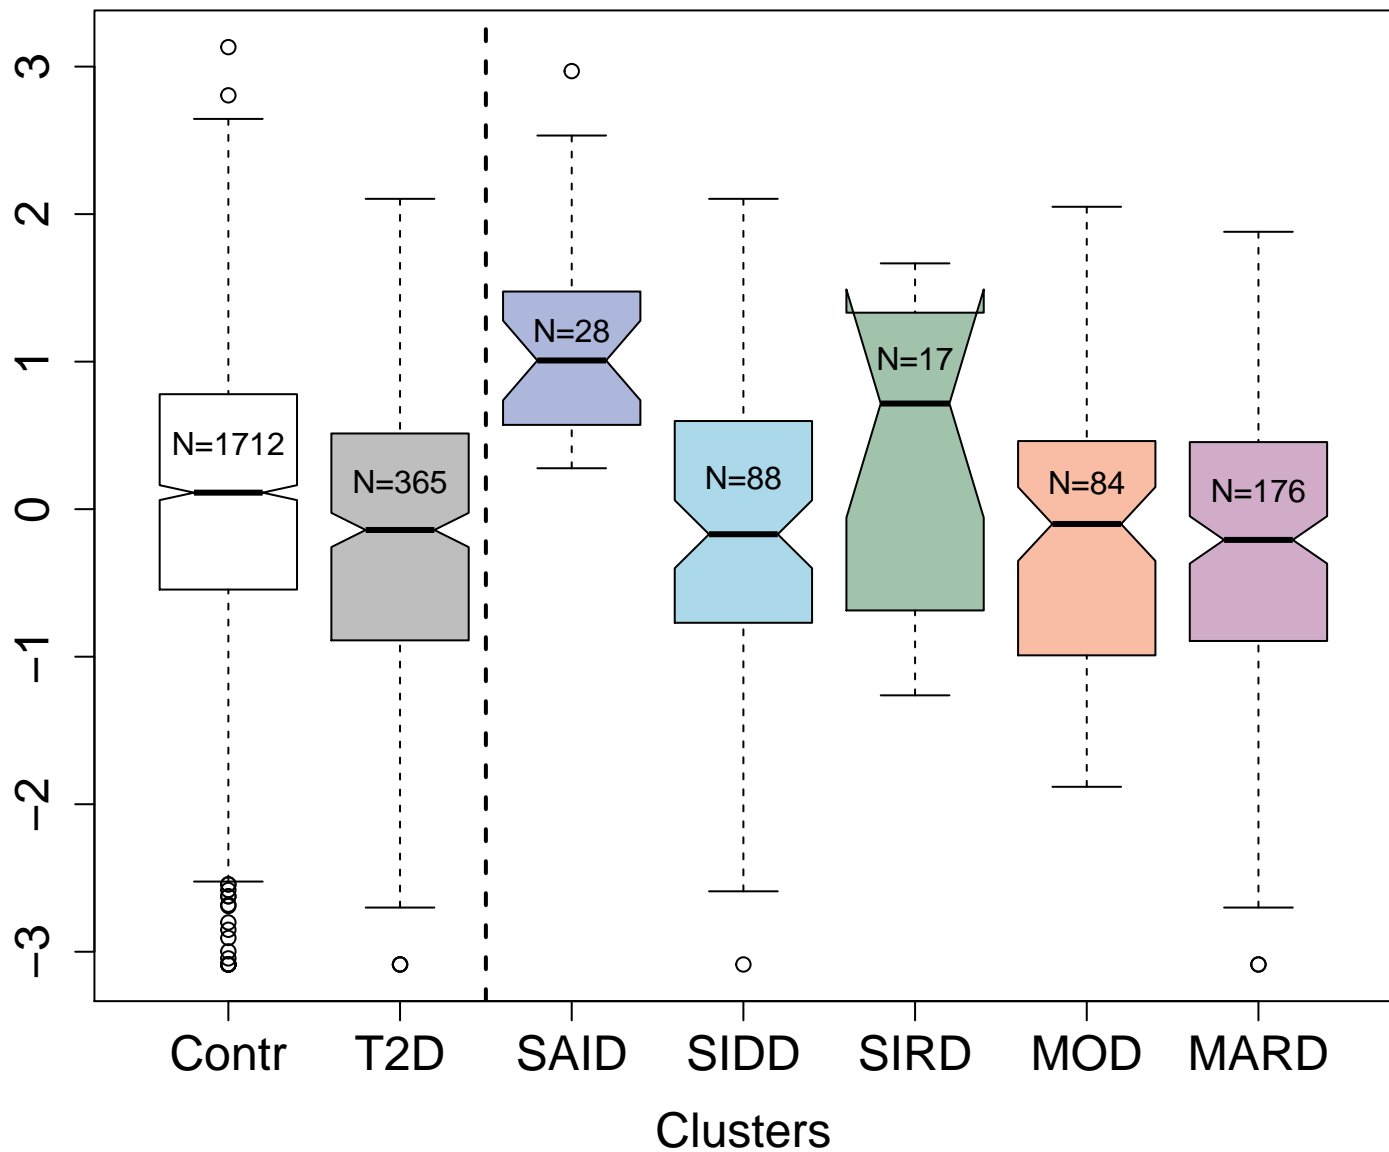

M63990 : 2-O-methylascorbic acid

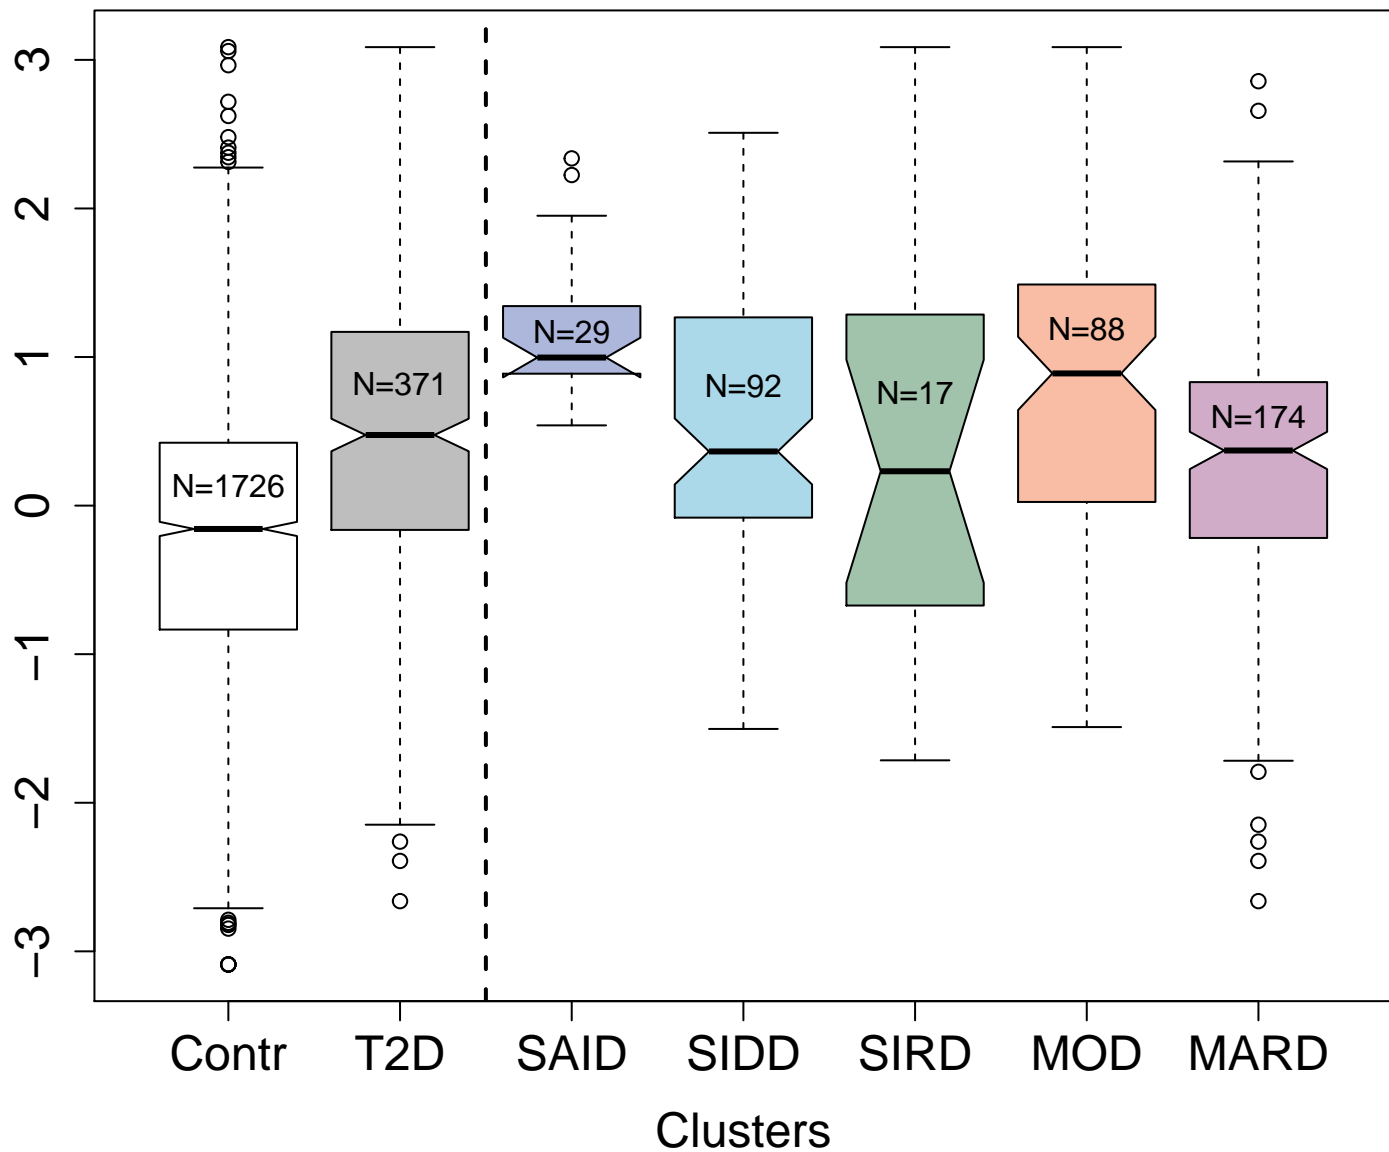



M62922 : pregnenetriol sulfate\*

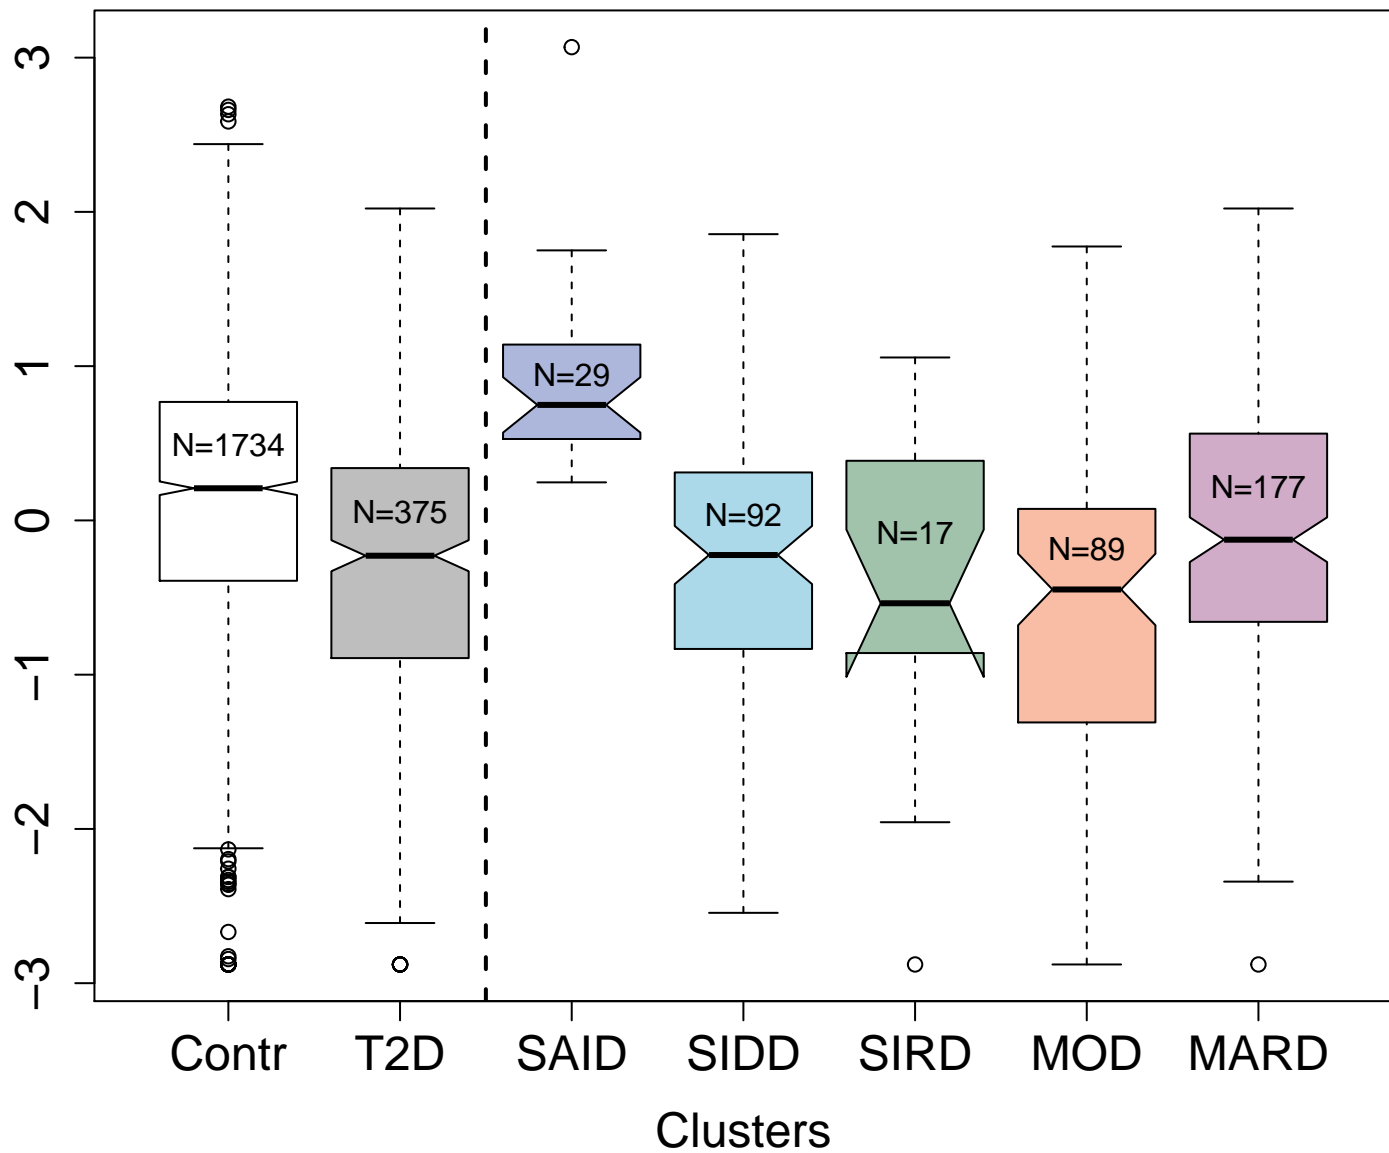

M46902 : X - 21733

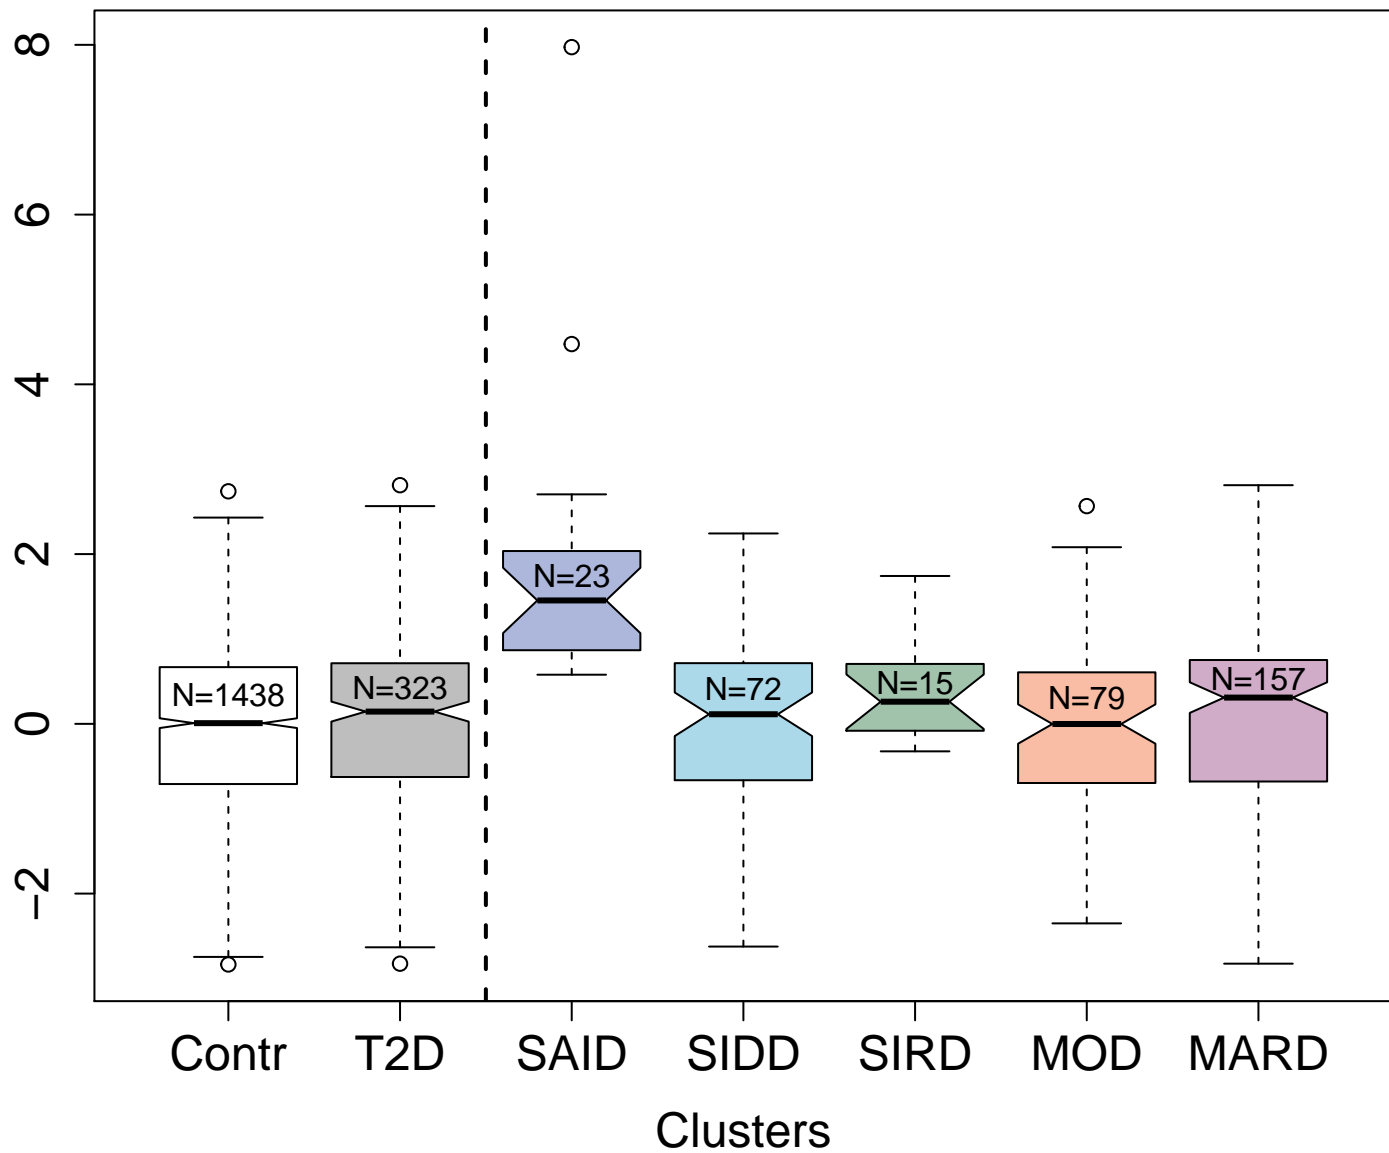

M36600 : 1-linoleoyl-GPE (18:2)\*

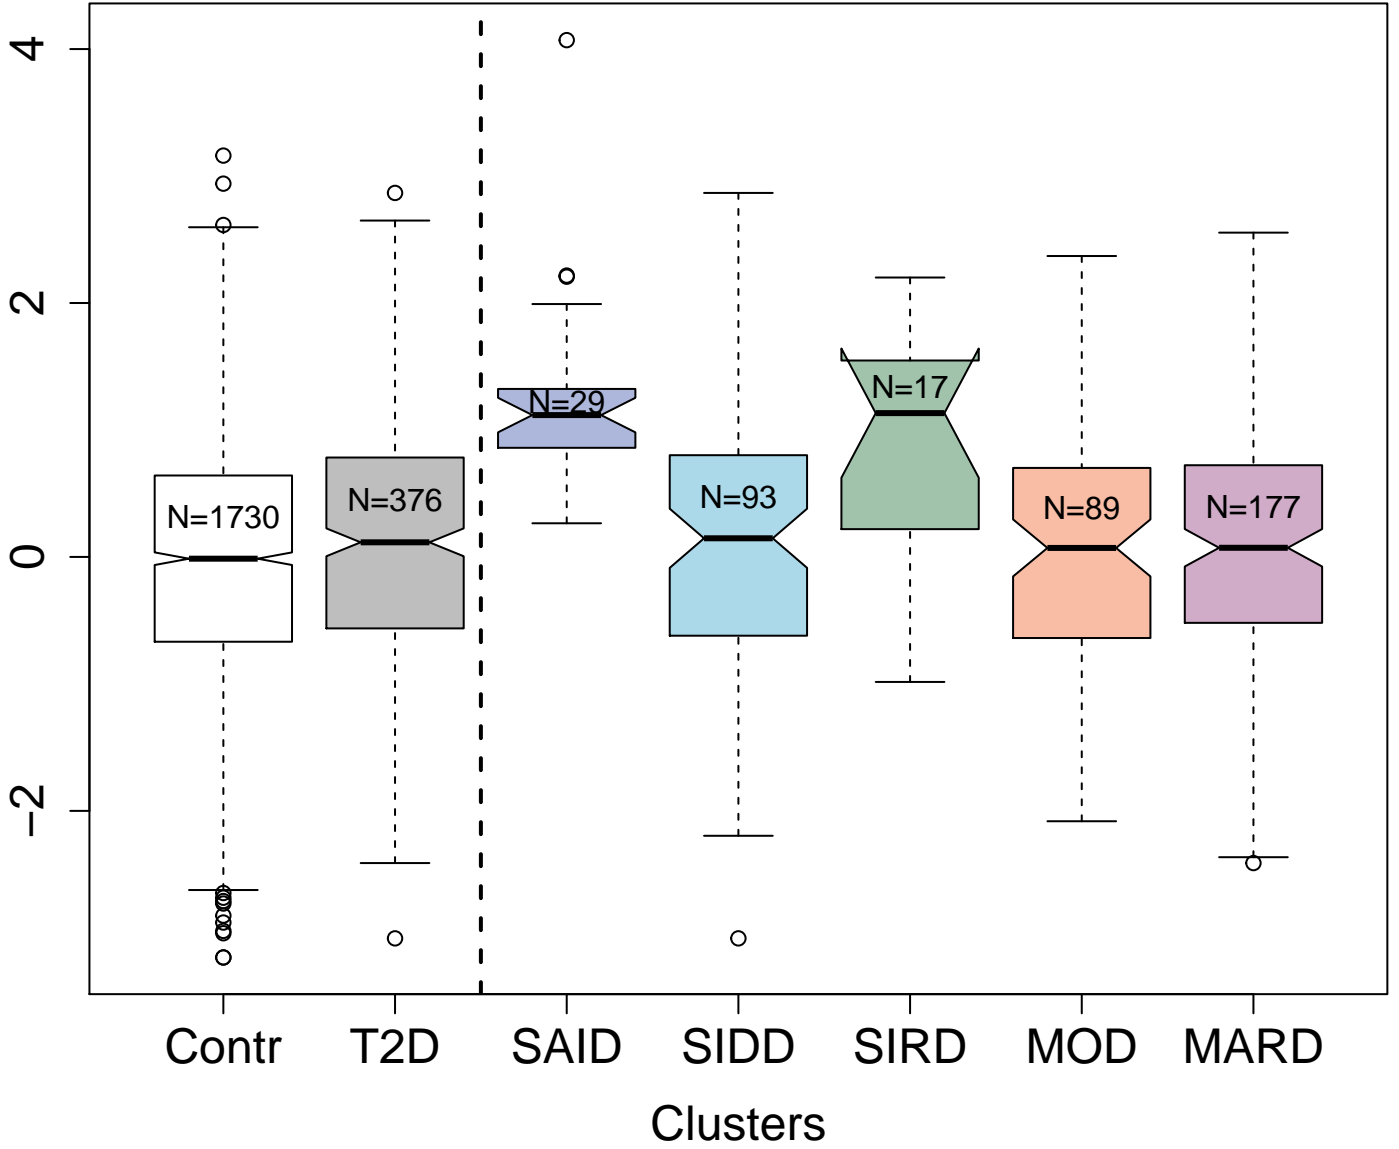

M19324 : 1-stearoyl-GPI (18:0)

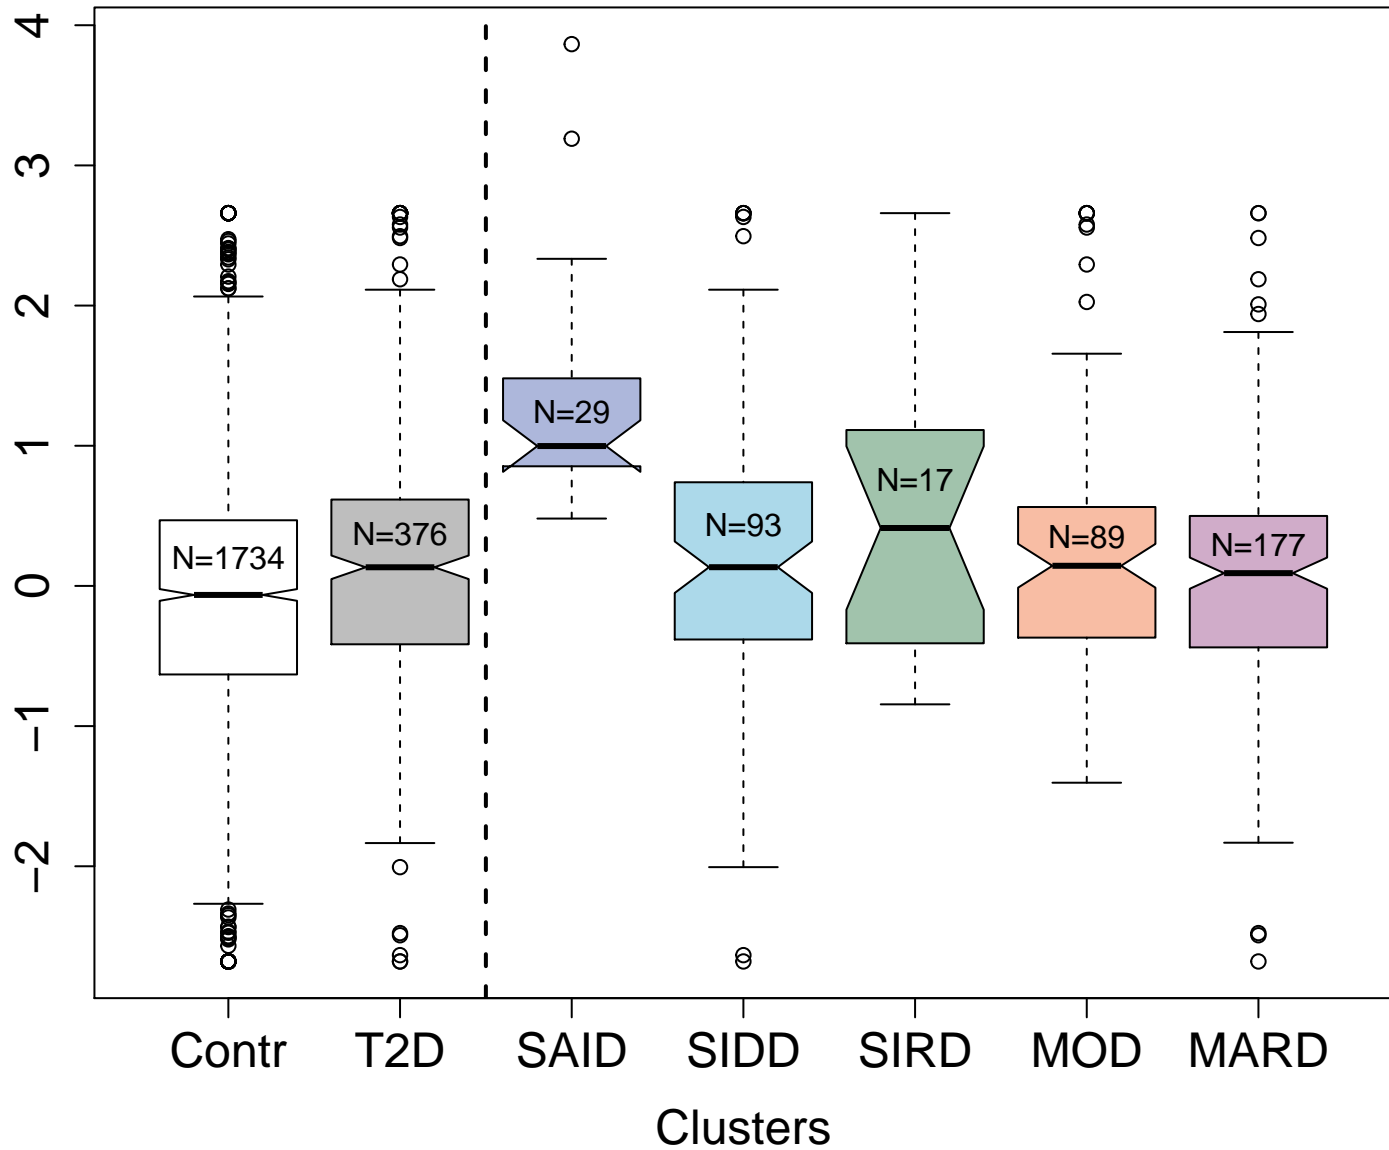

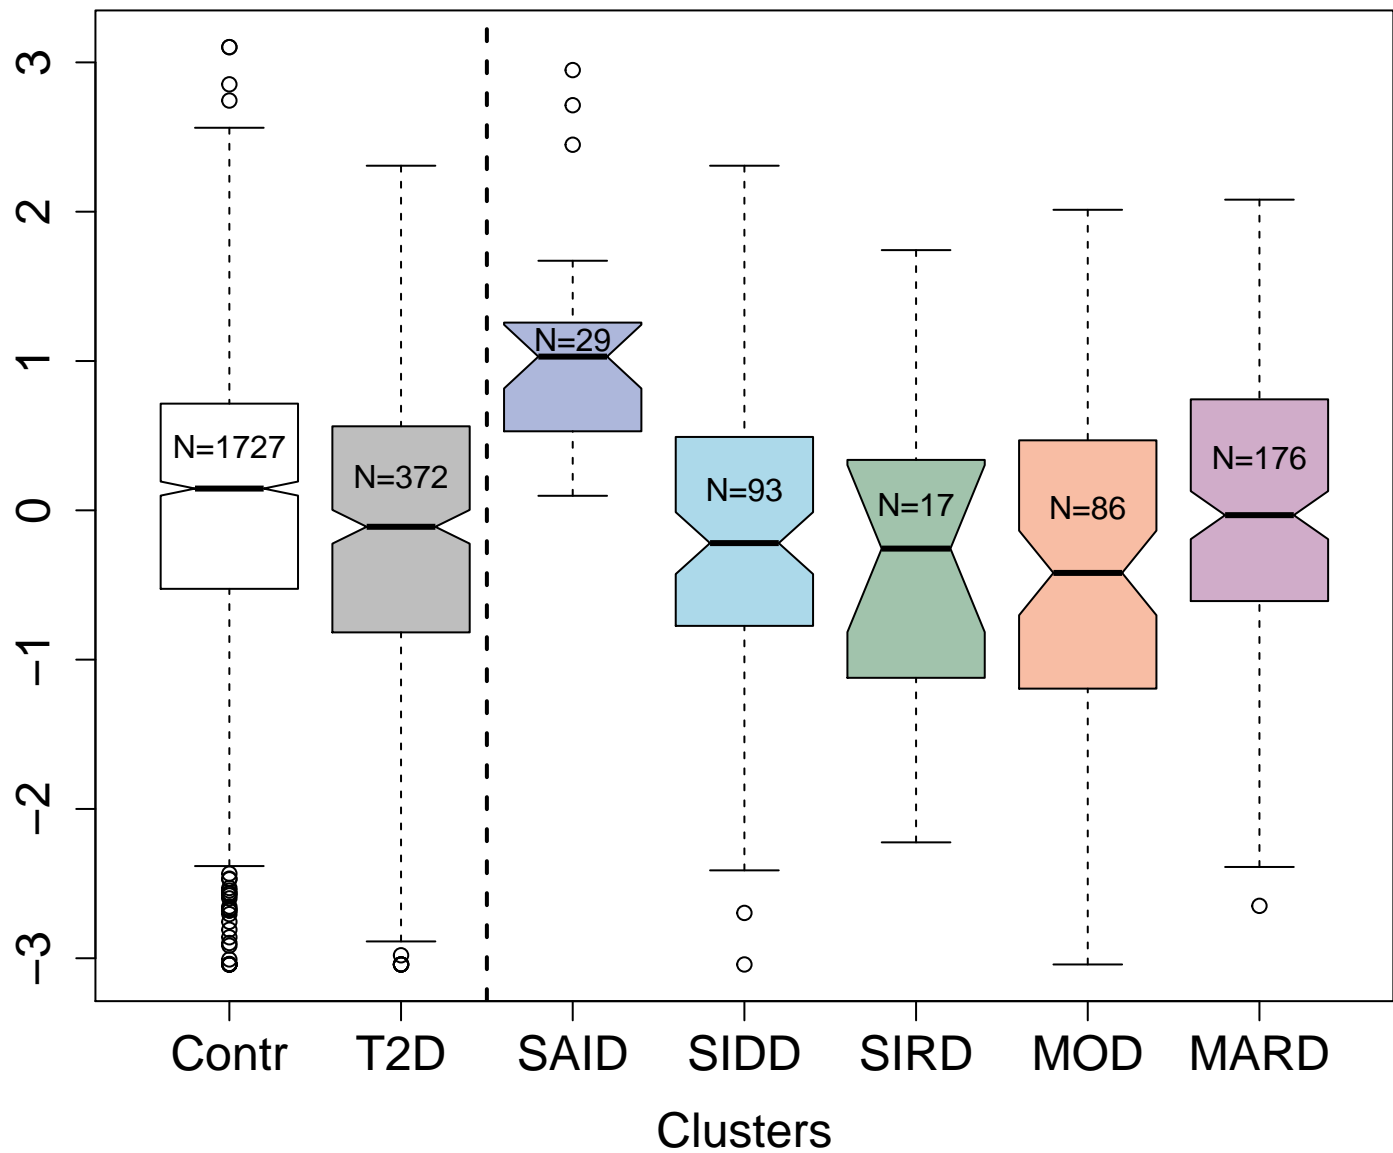

M34400 : 1,7-dimethylurate

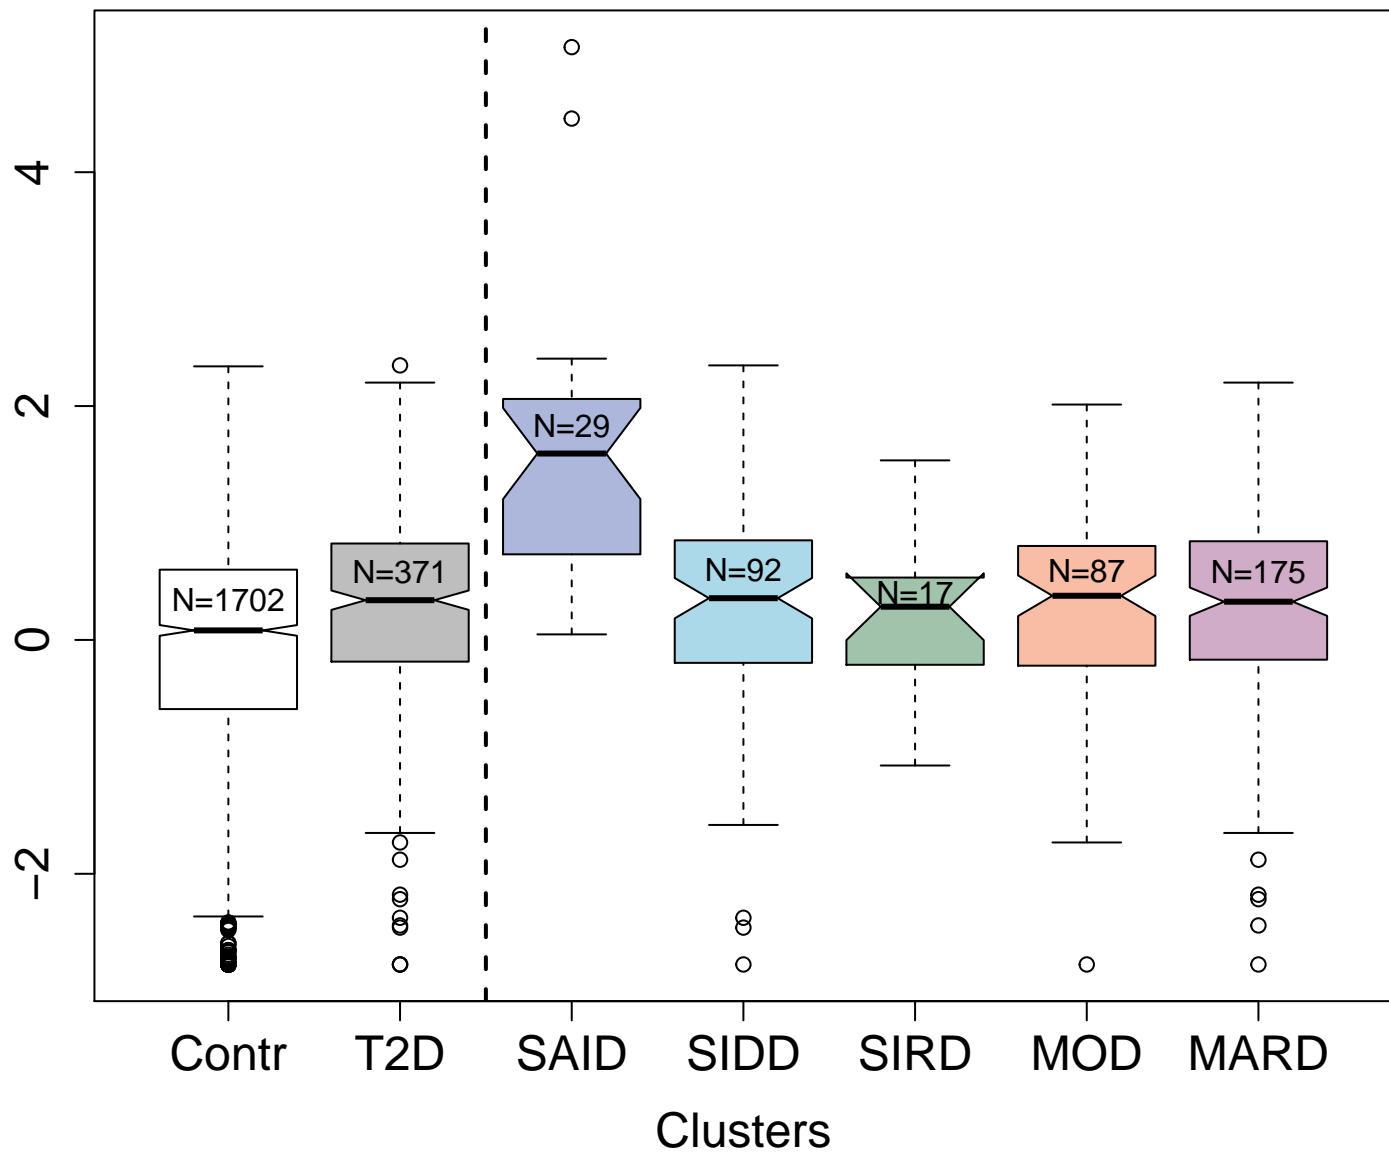

M63926 : alpha-CMBHC glucuronide

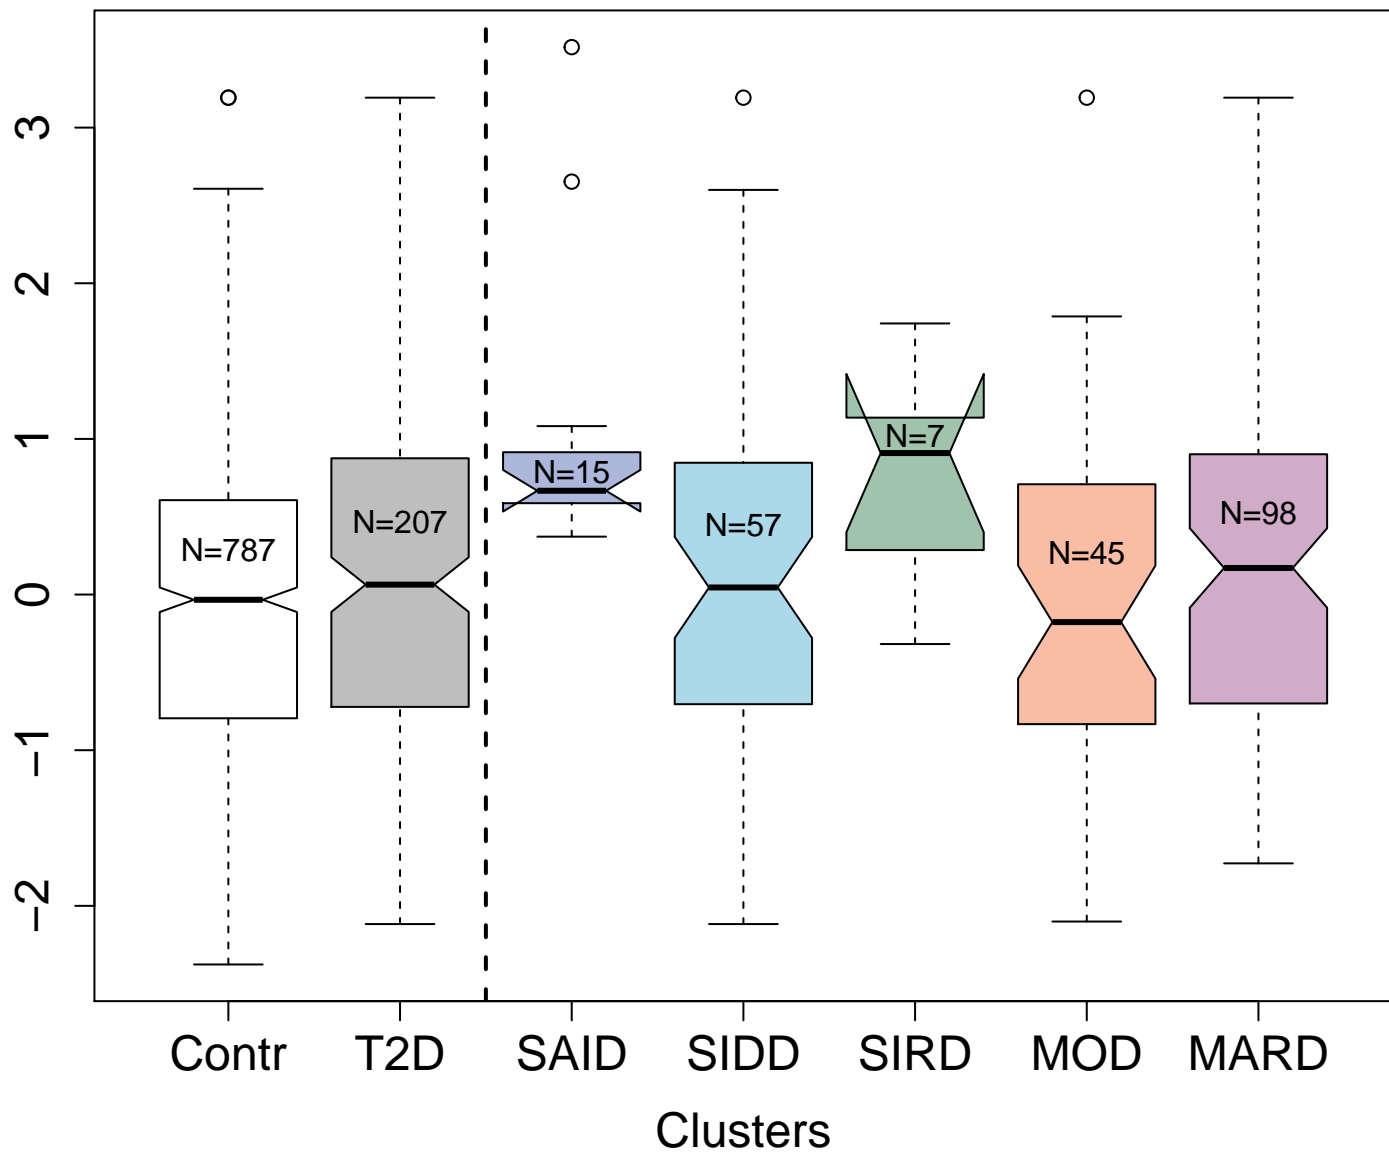

M57655 : 2'-O-methyluridine

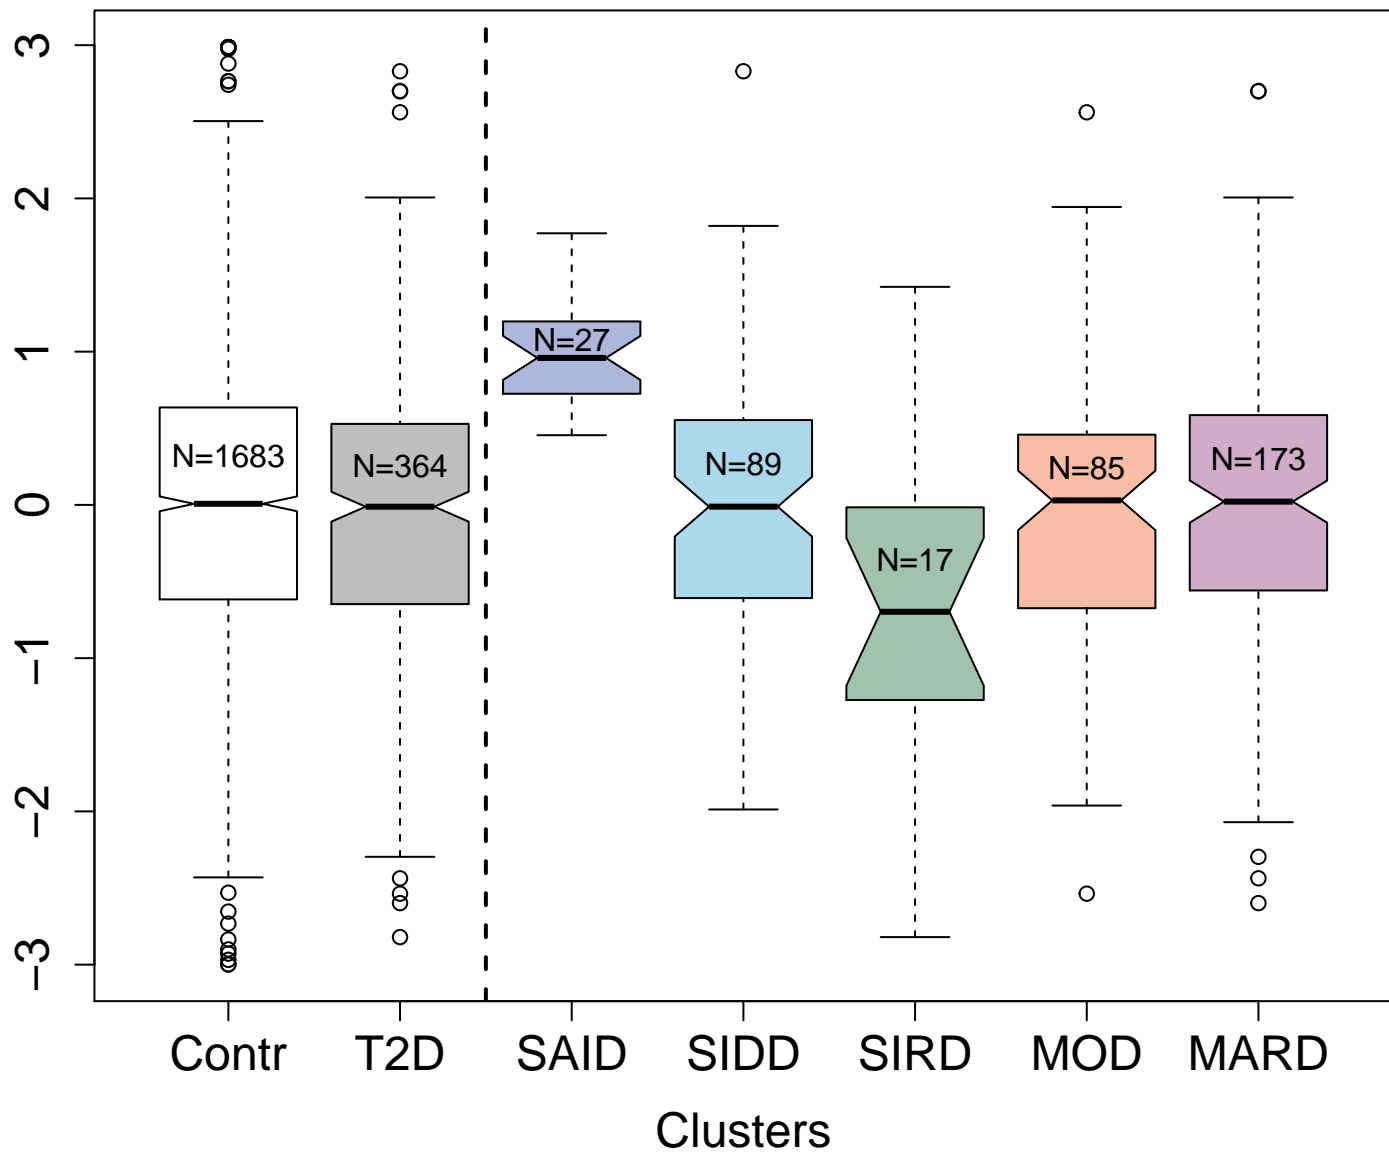



M36594 : 1-linoleoyl-GPI (18:2)\*

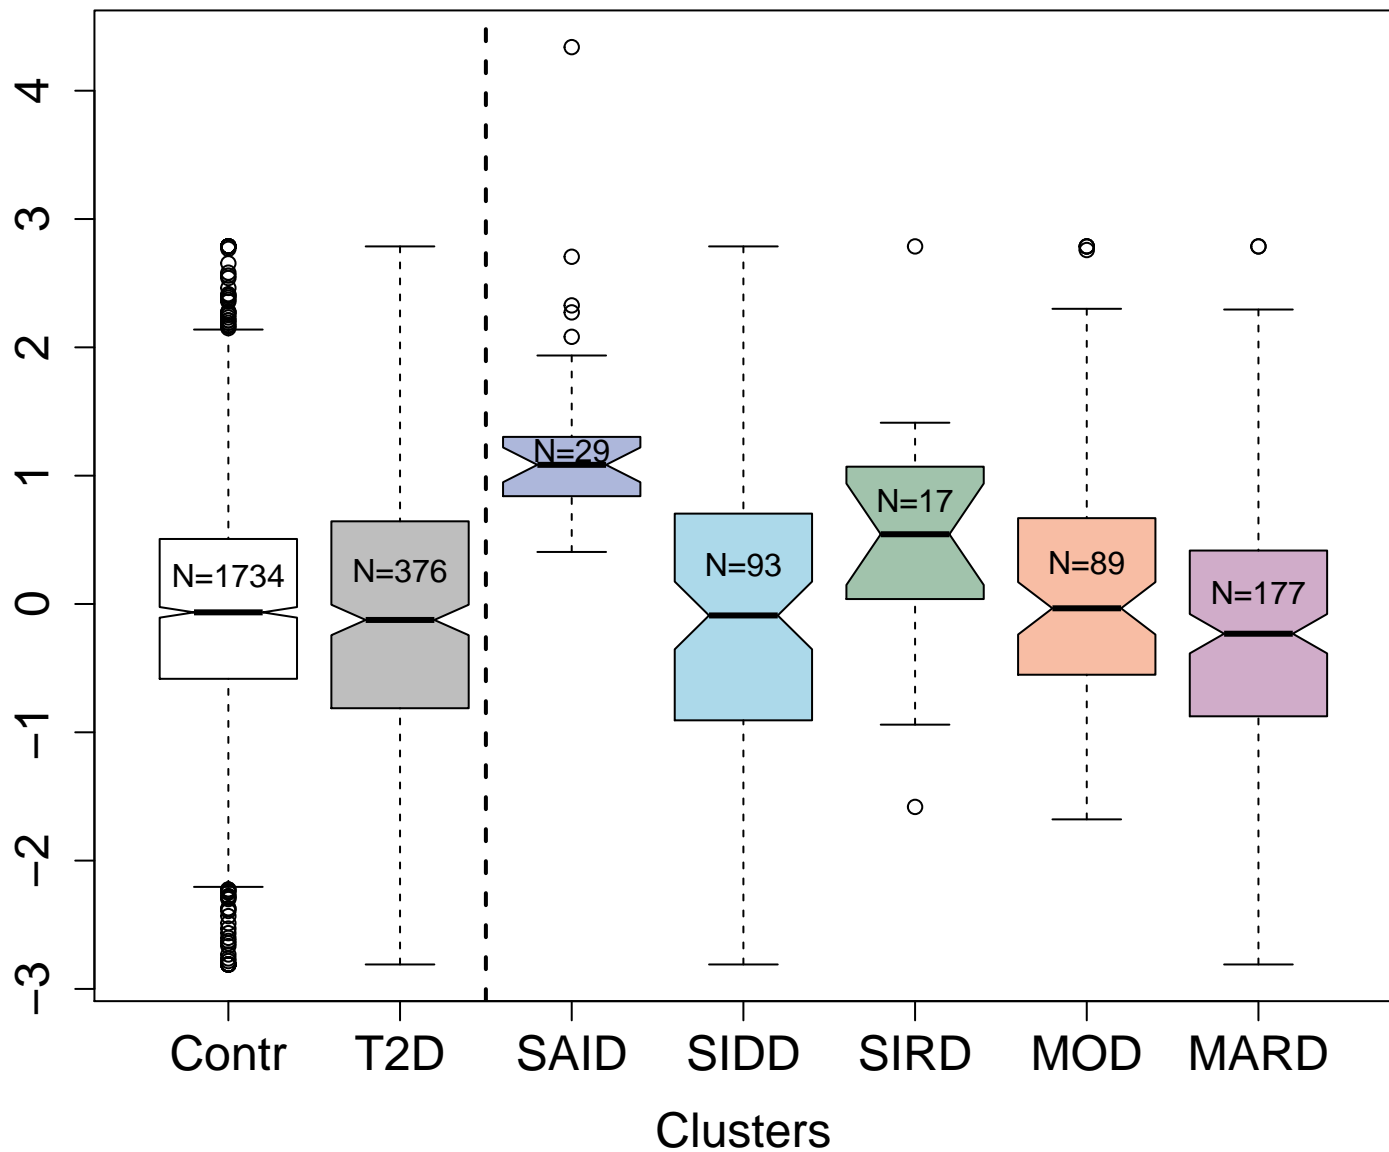

M47657 : X - 12261

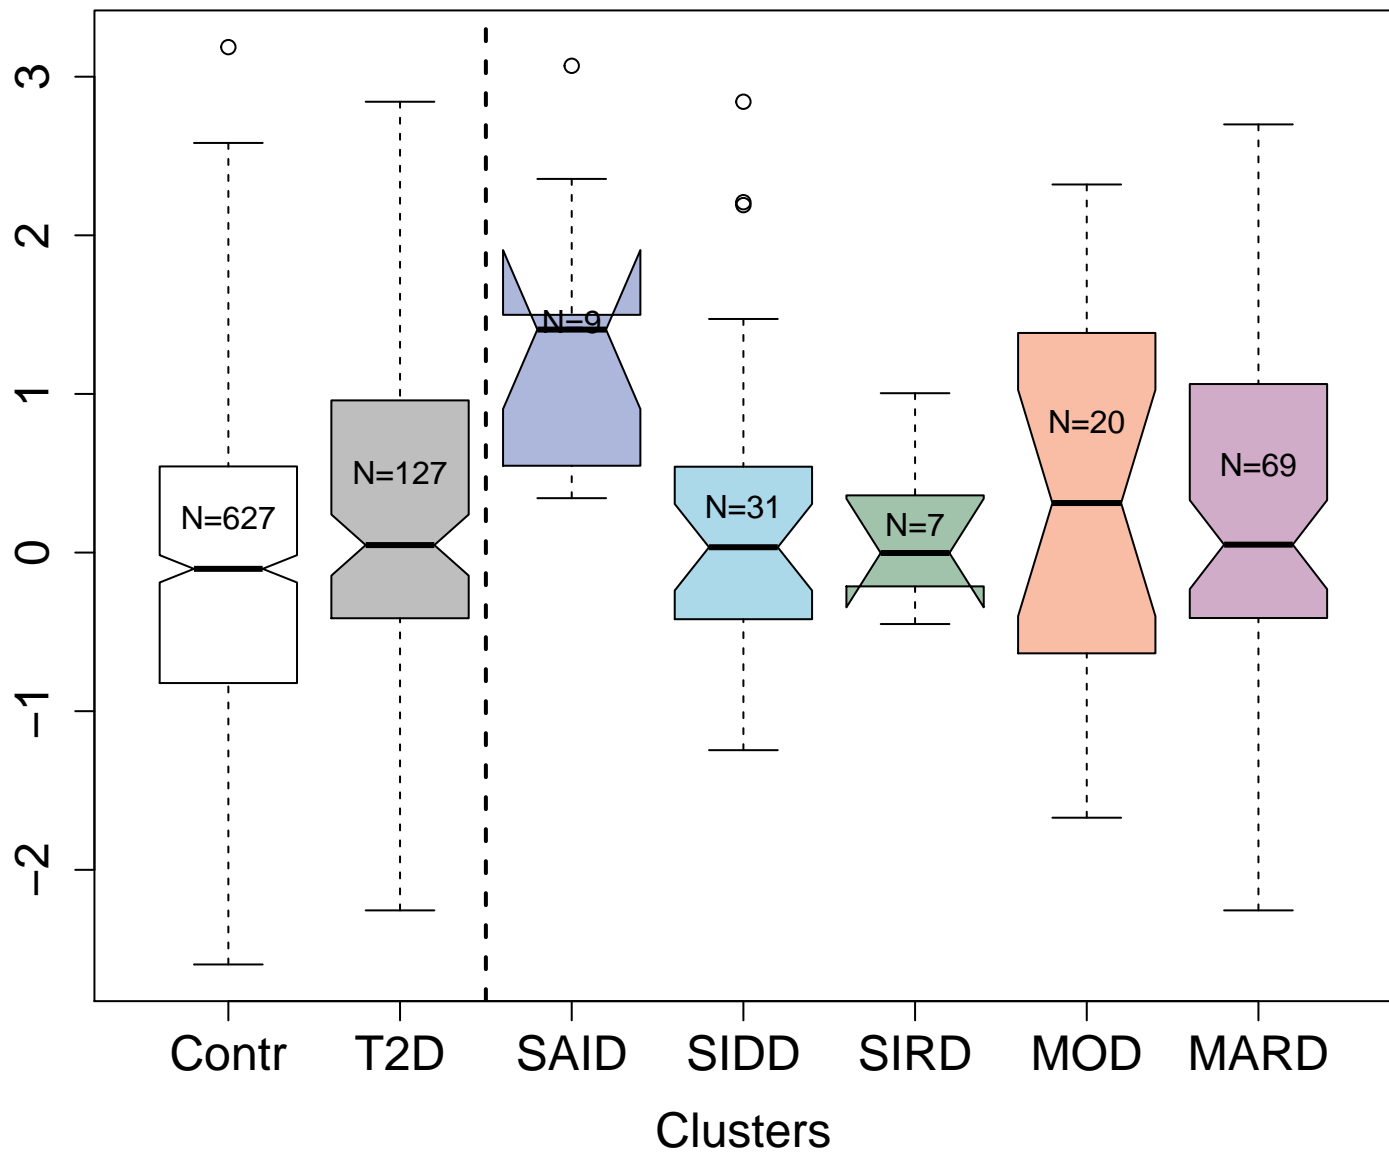

M46690 : X - 18901

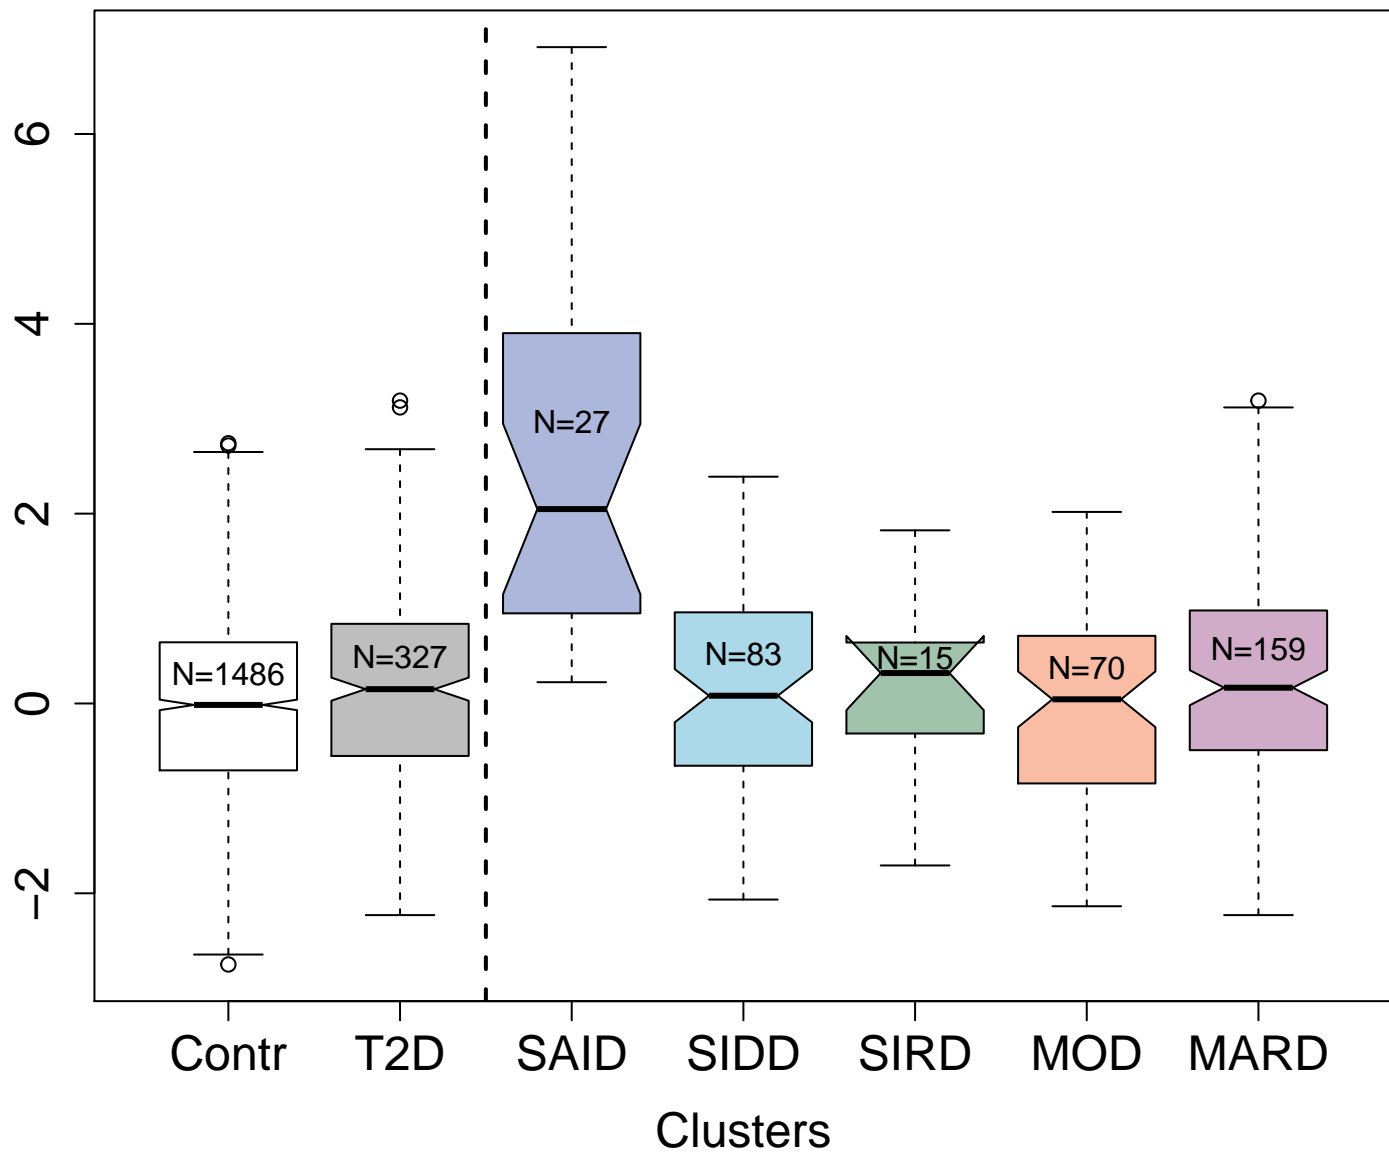

M46487 : X - 21442

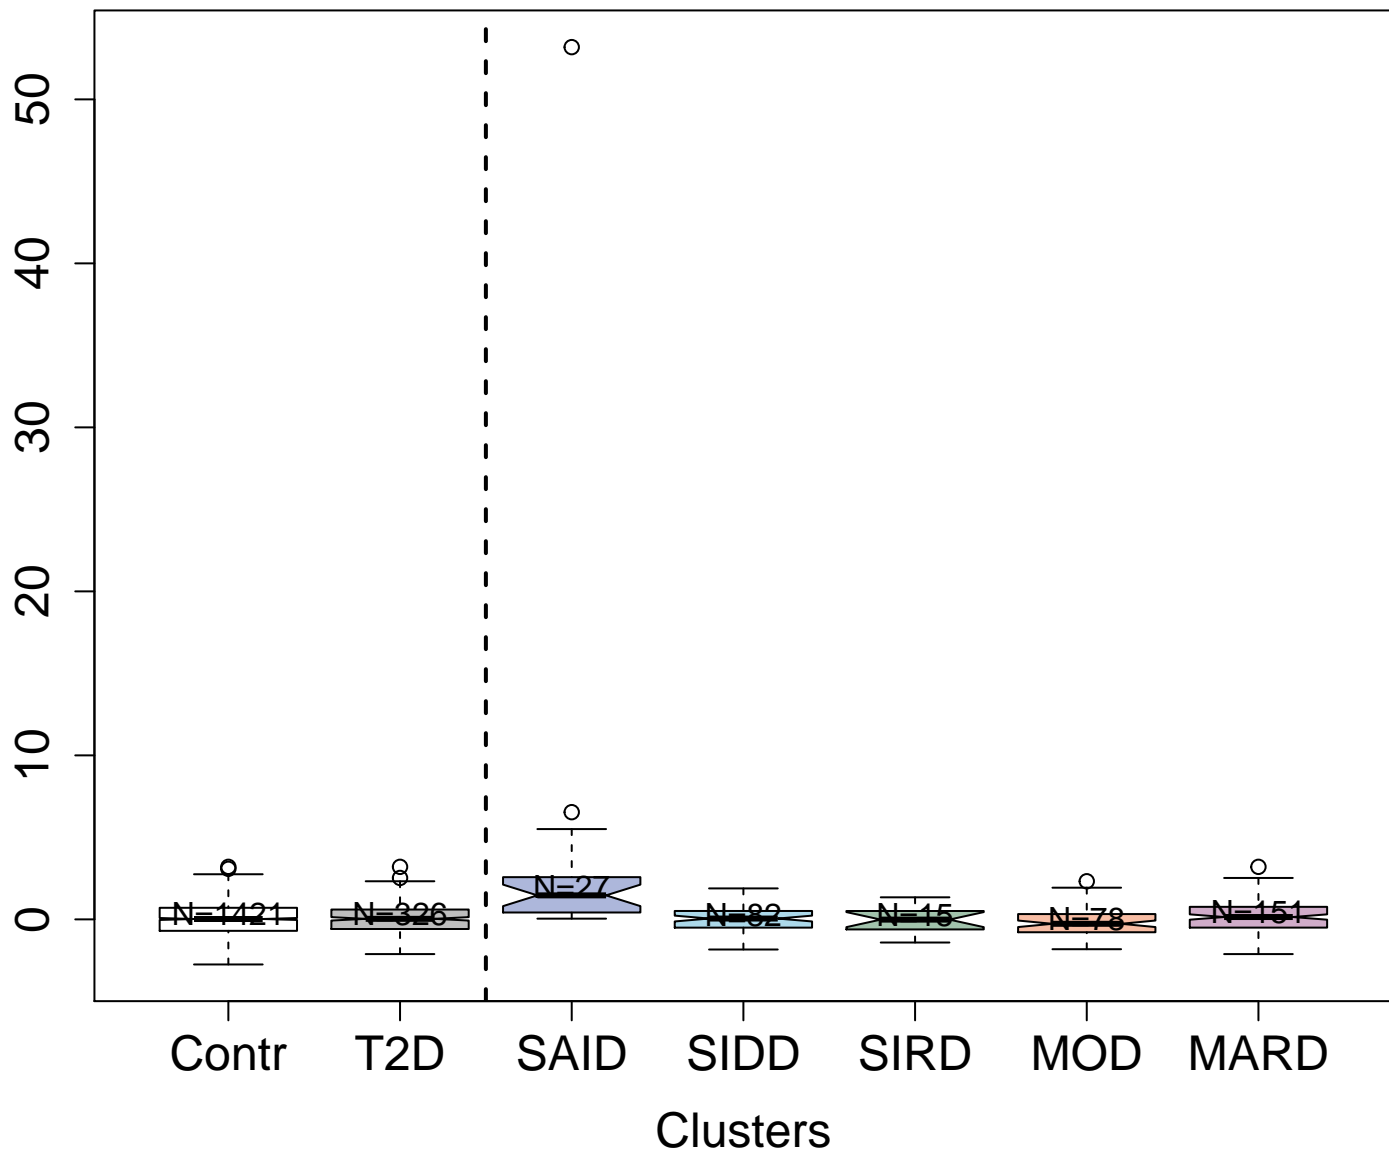

M35159 : cysteine-glutathione disulfide

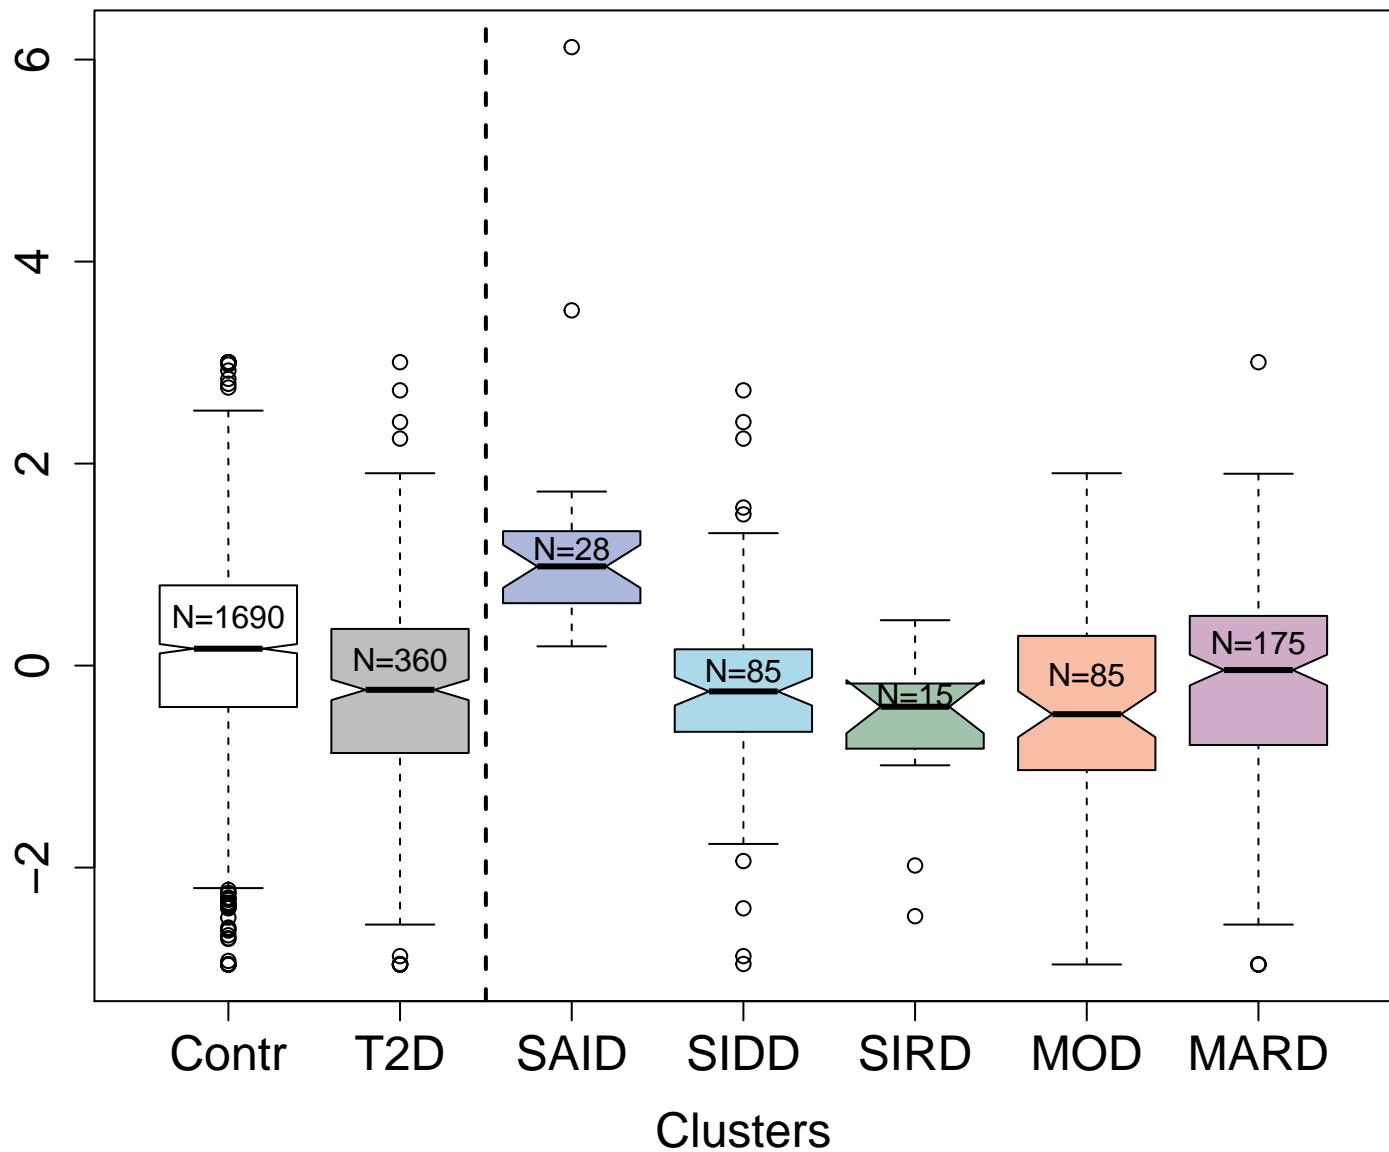

M62567 : 3-(methylthio)acetaminophen sulfate\*

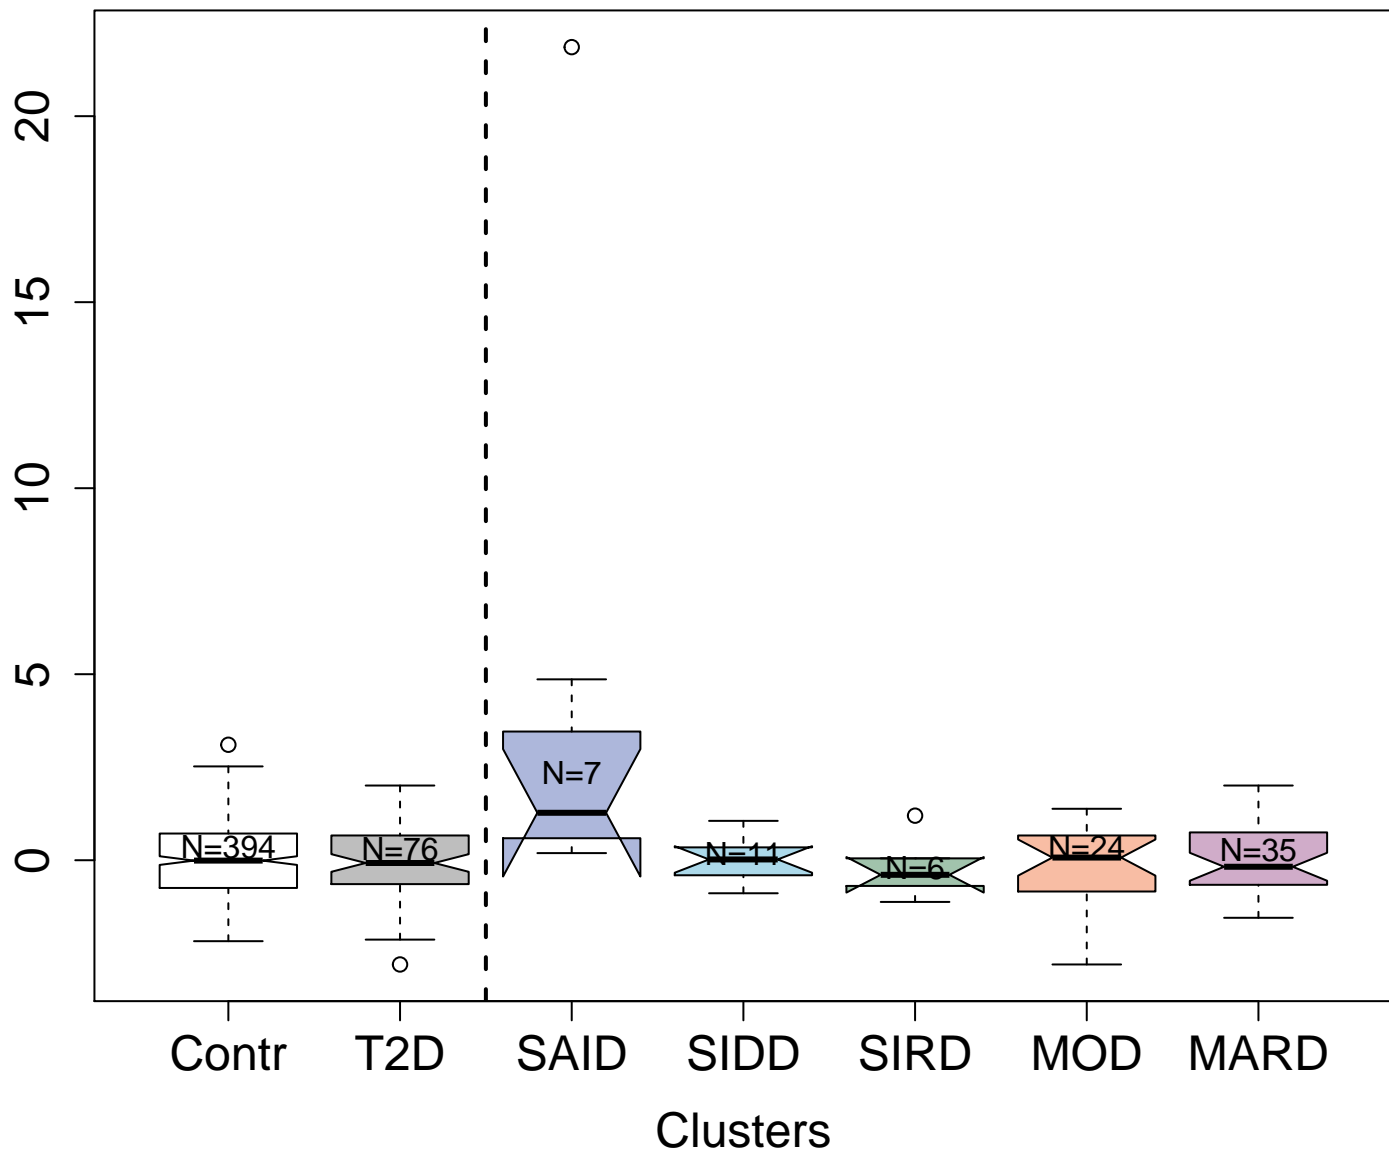

M1806 : retinol (Vitamin A)

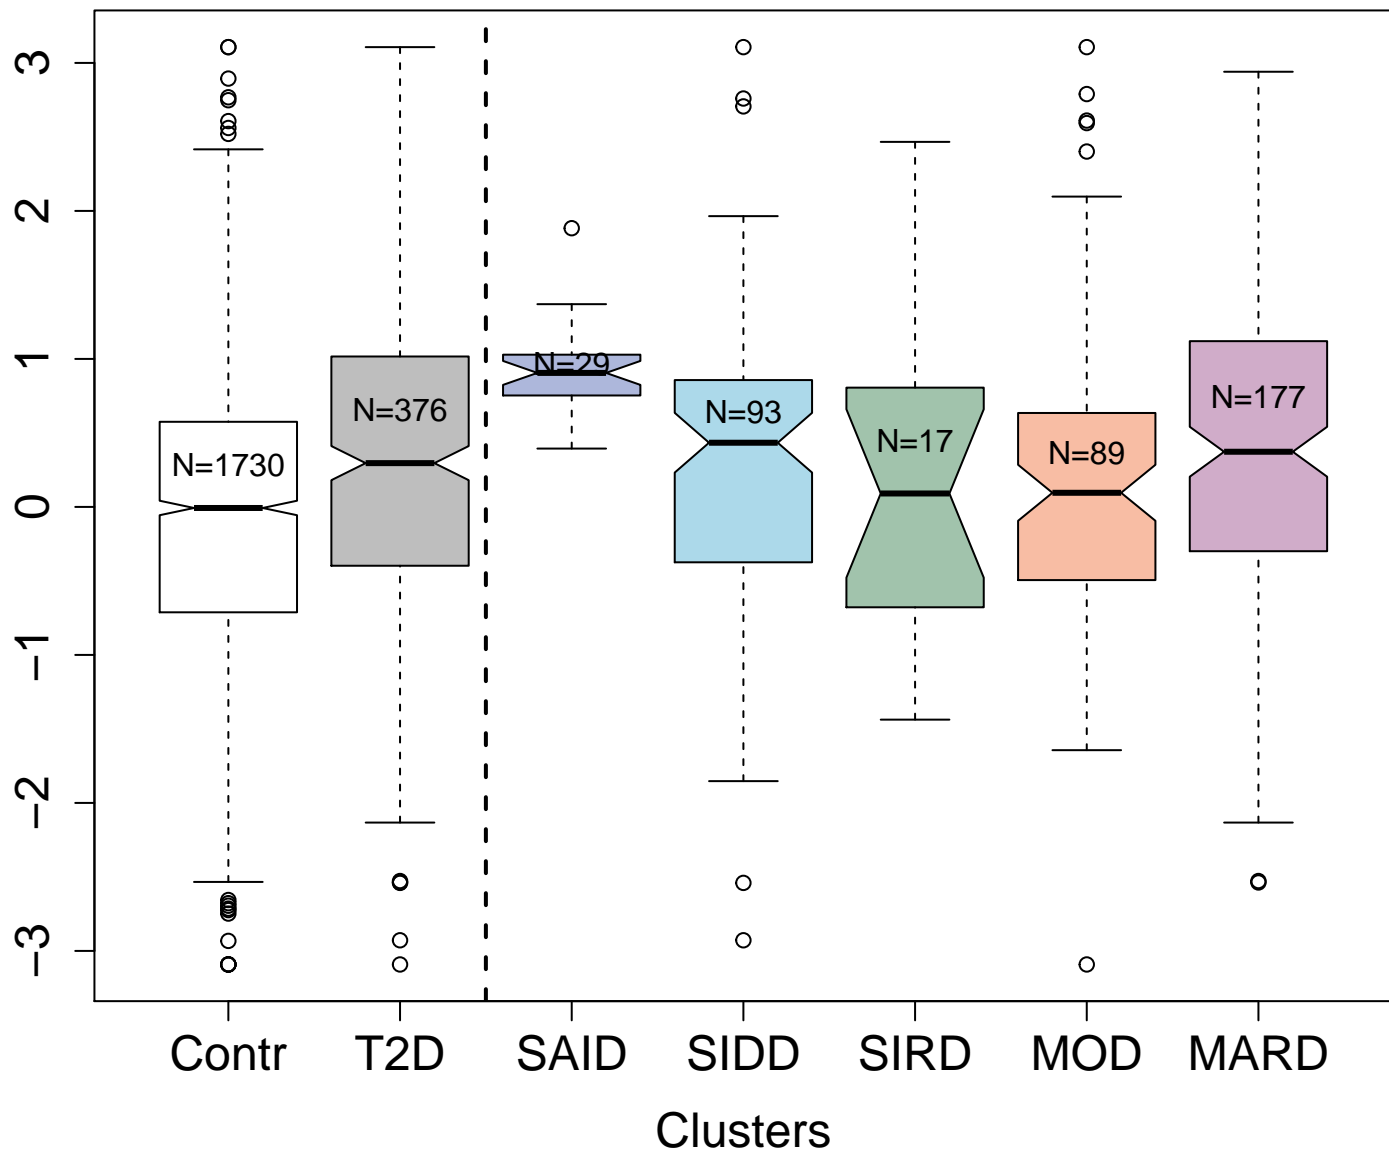

M48408 : tyramine O-sulfate

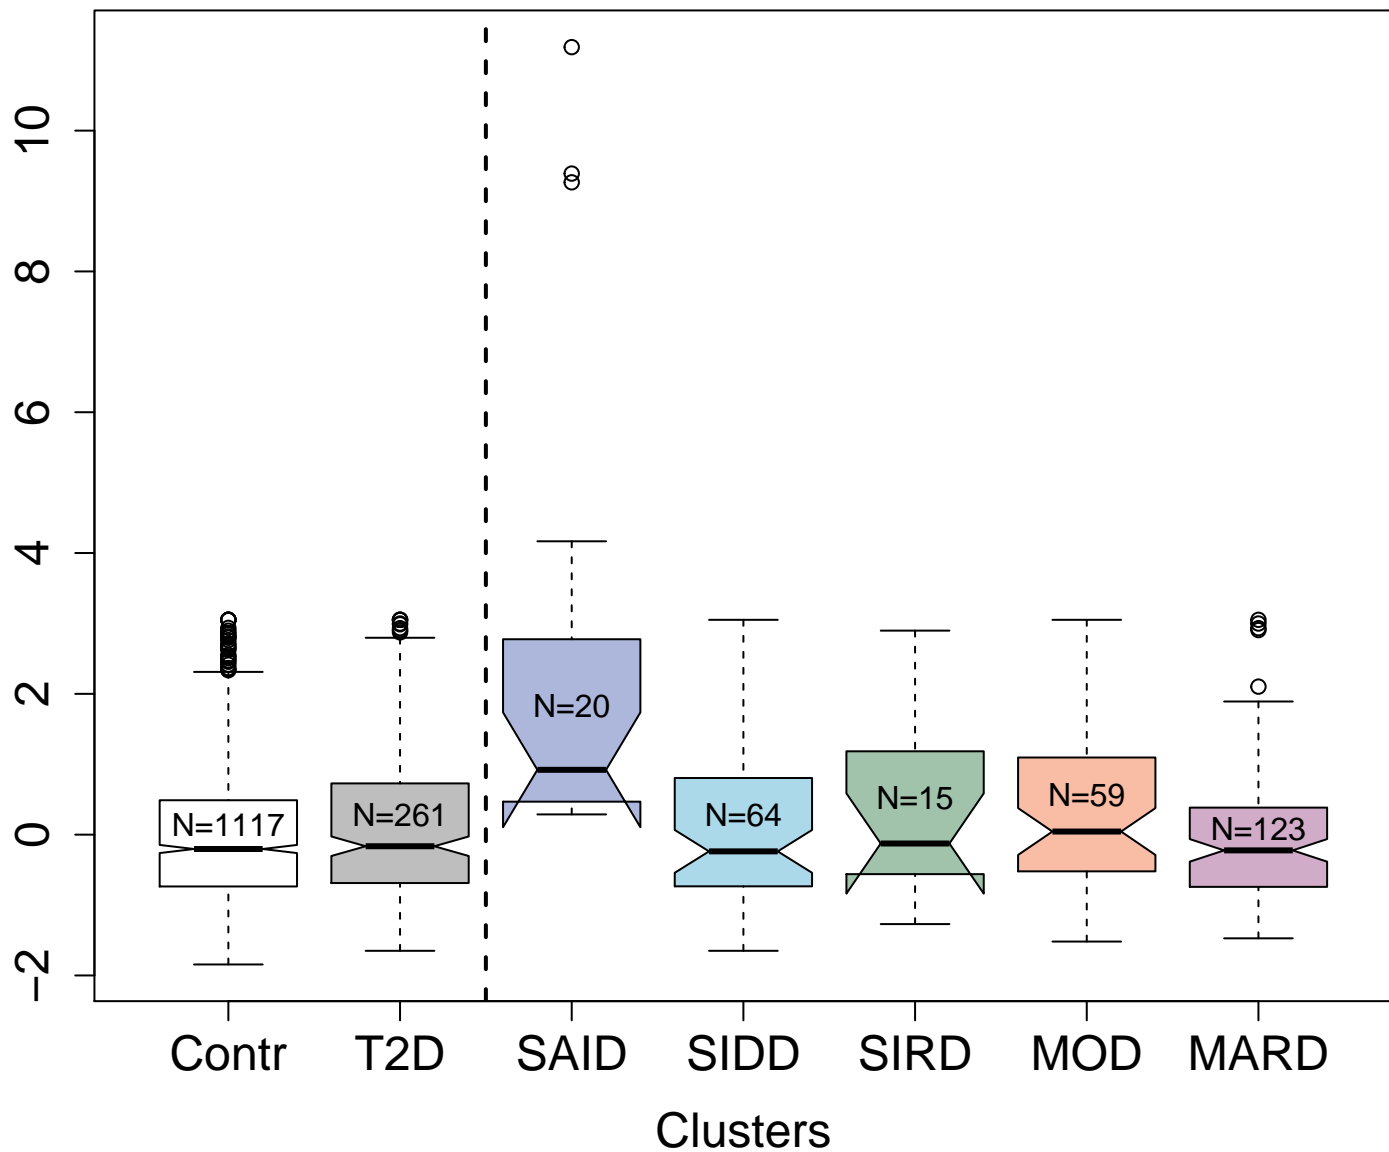



M37058 : succinylcarnitine (C4-DC)

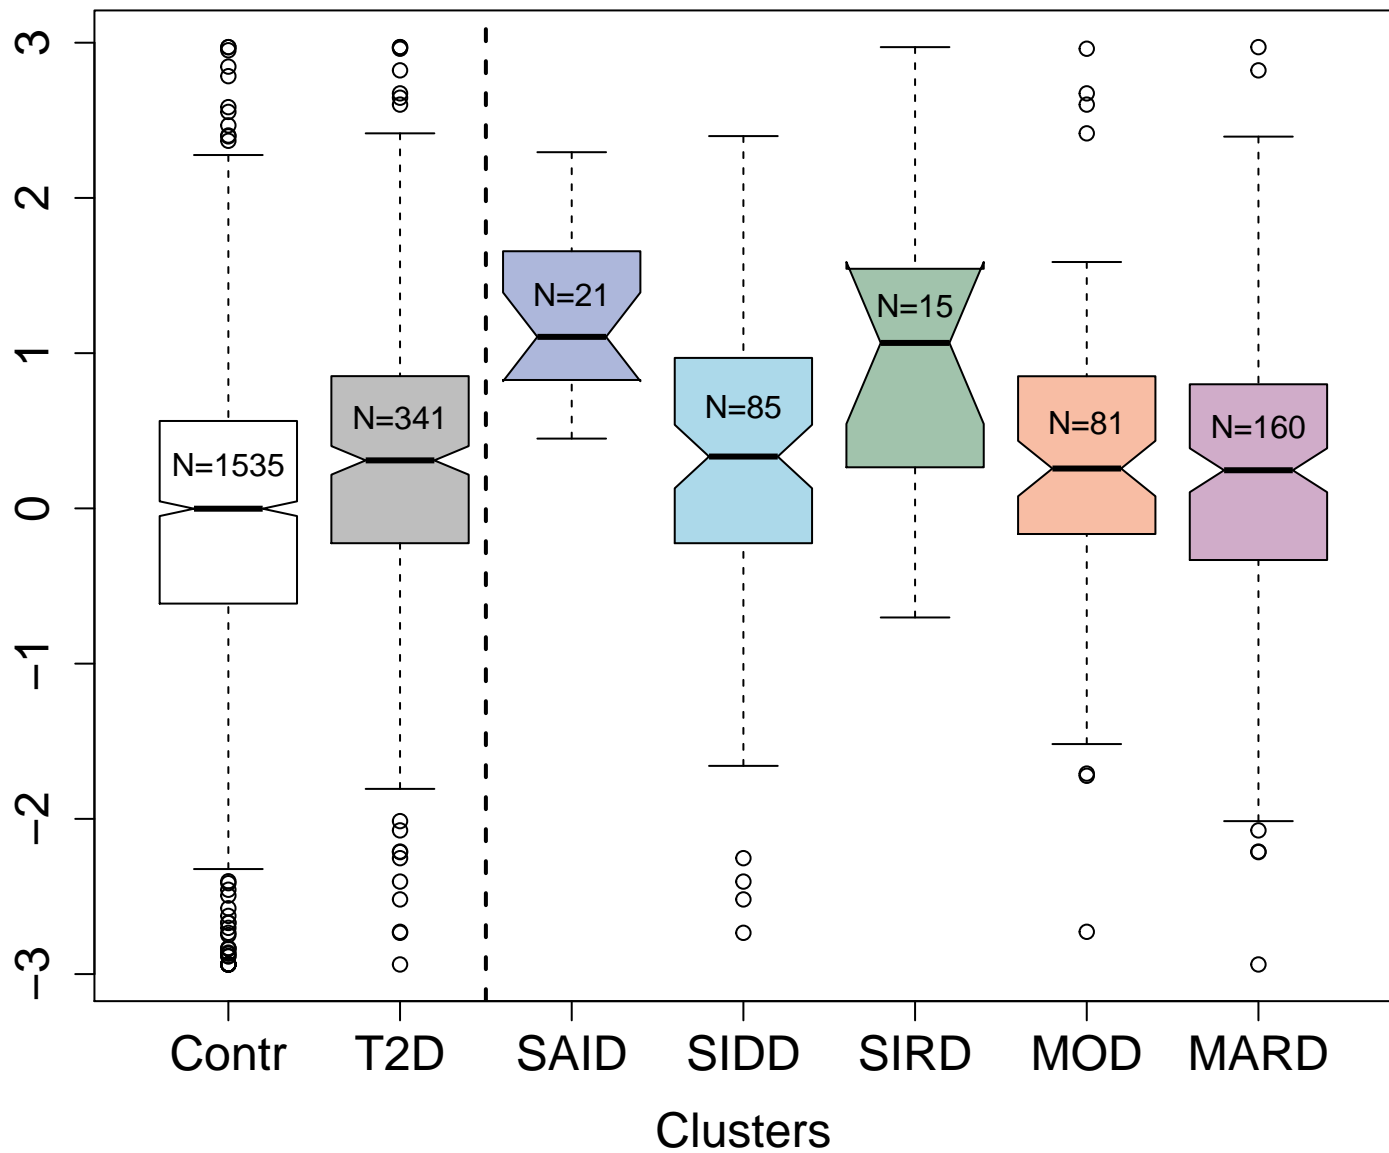

M52647 : X - 24418

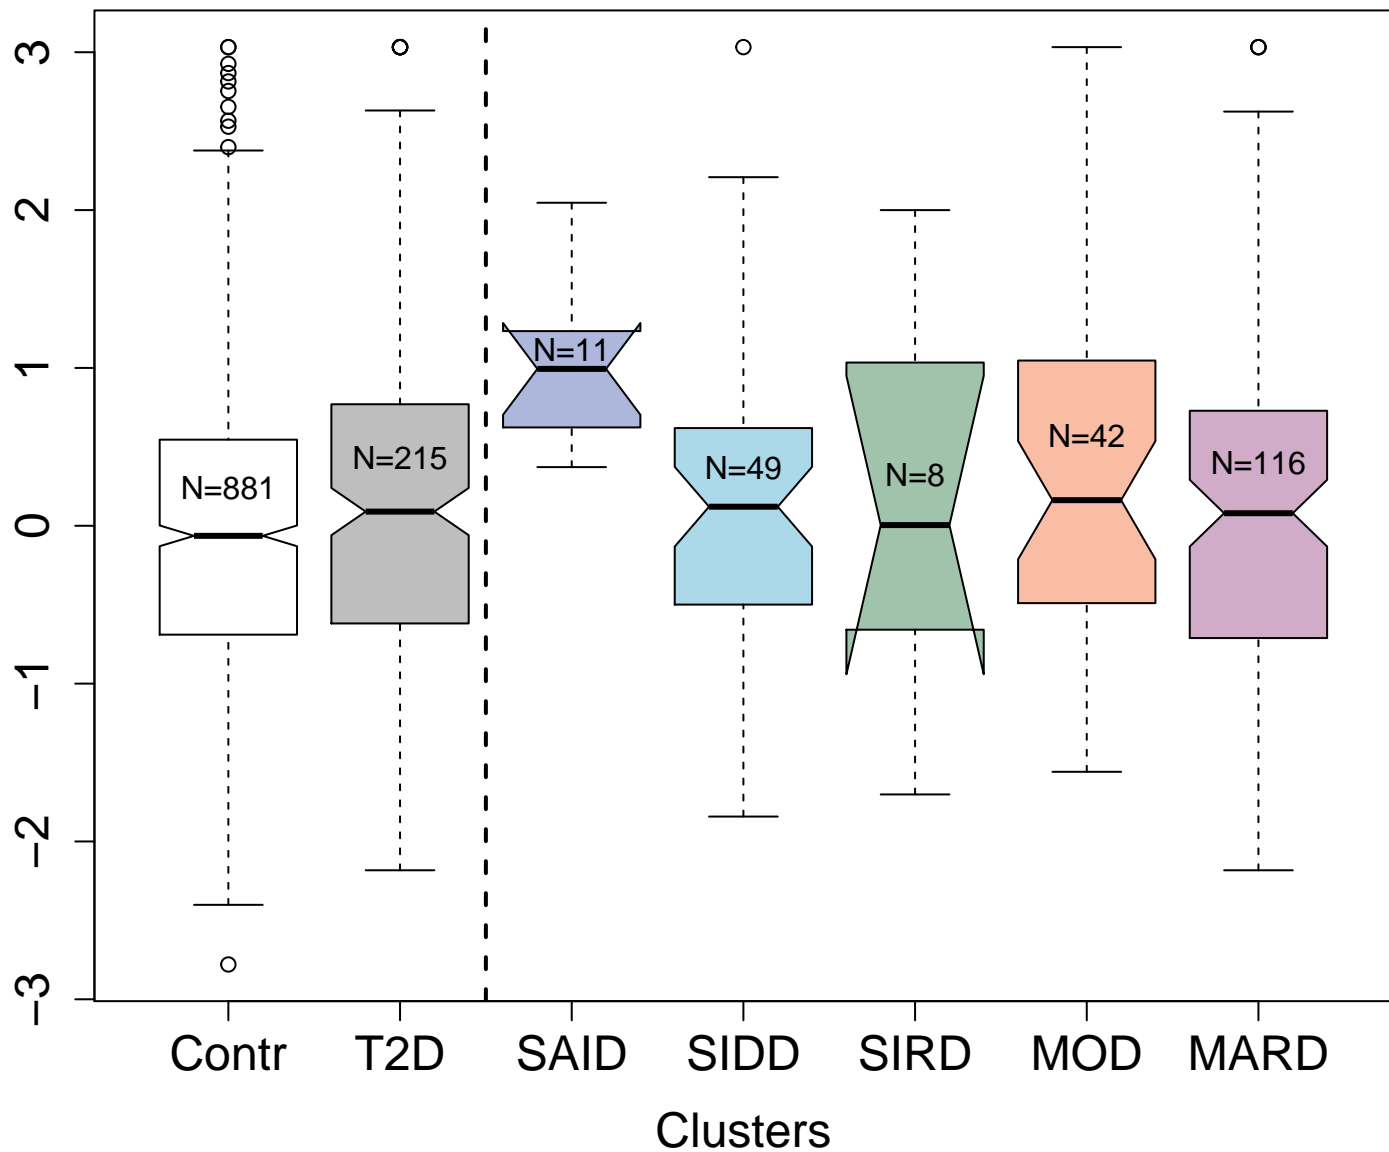

M47997 : X - 17346

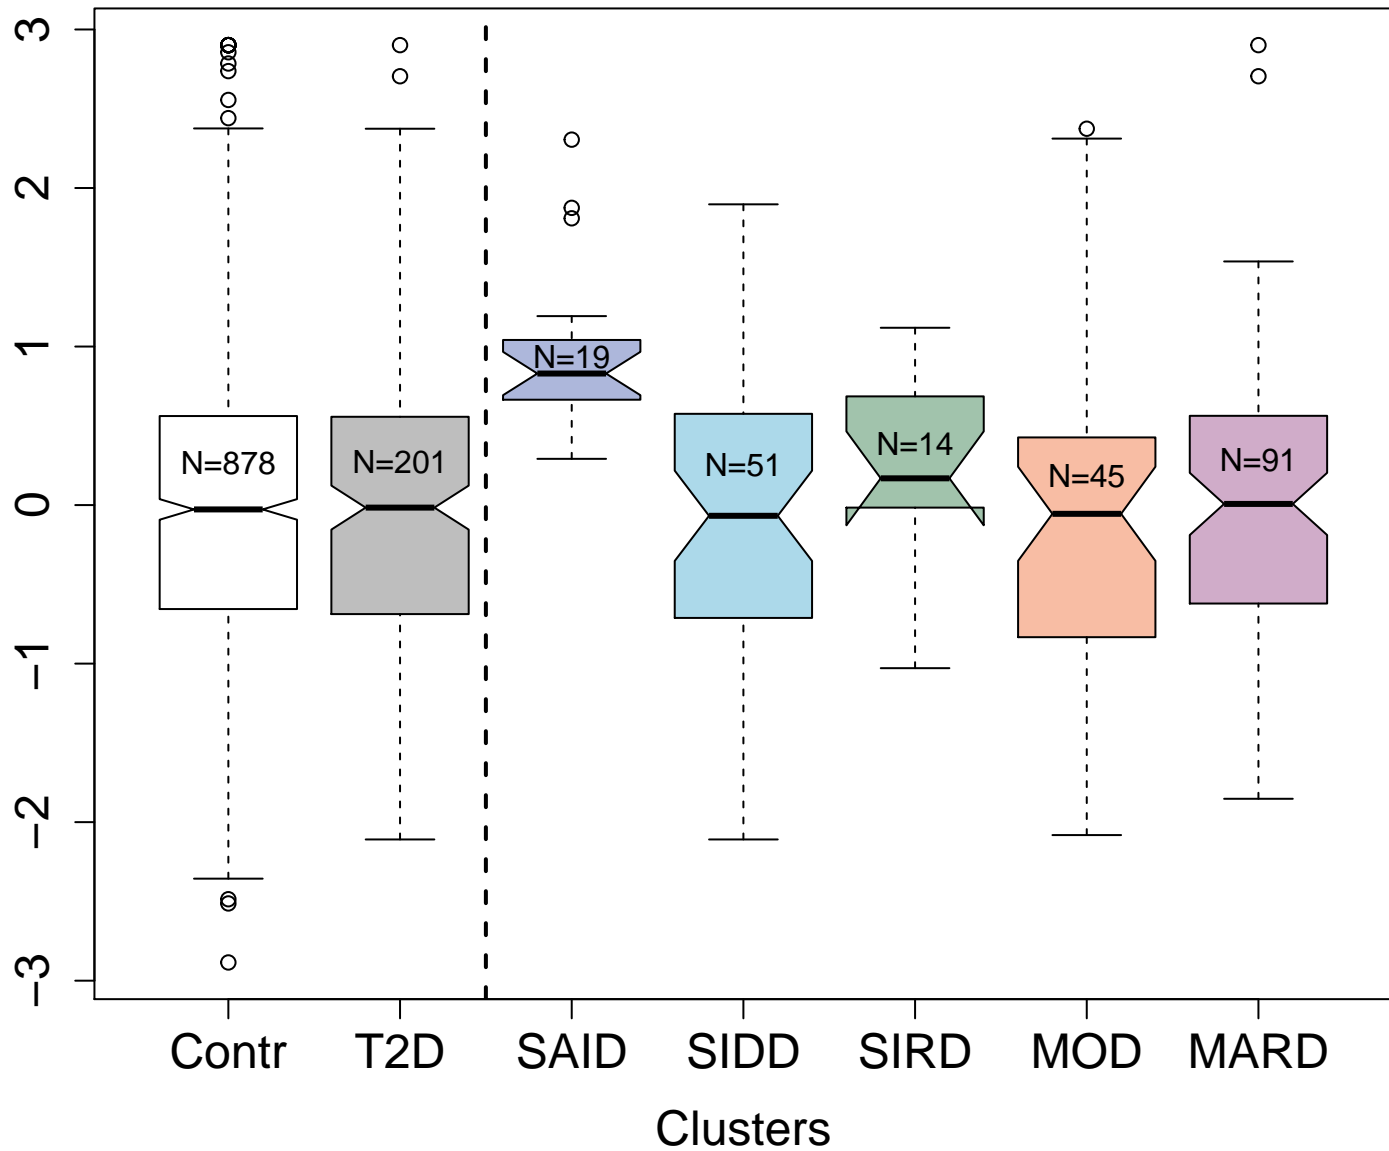

M52434 : palmitoyl dihydrospingomyelin (d18:0/16:0)\*

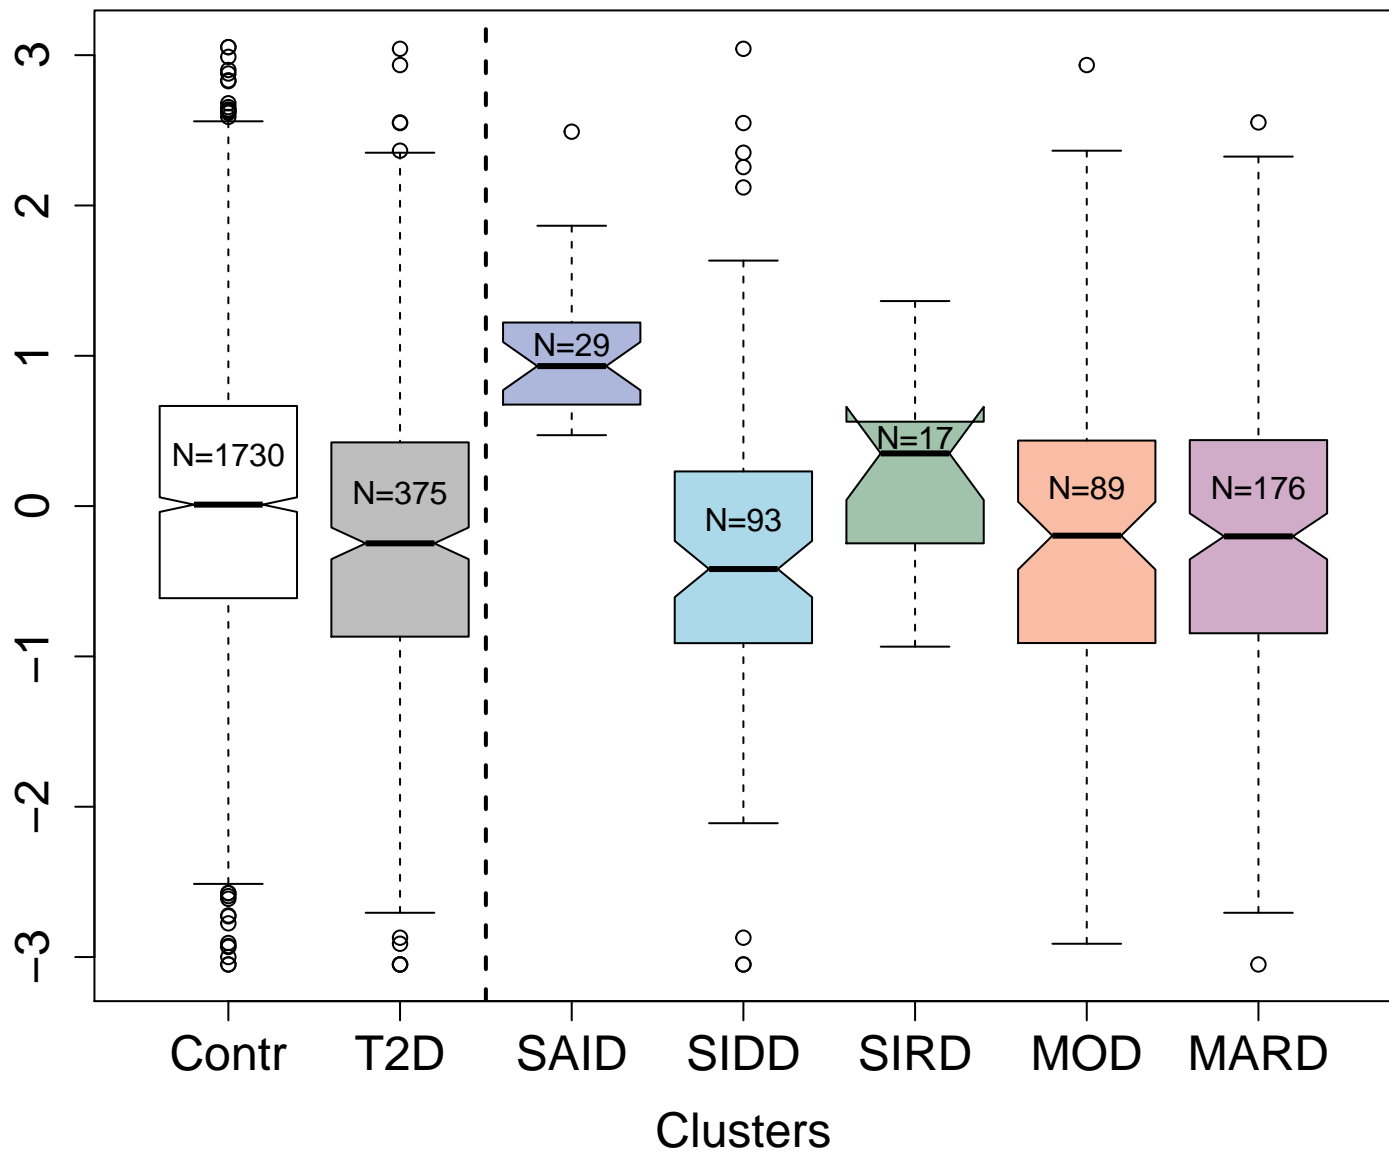

M38399 : 9,10-DiHOME

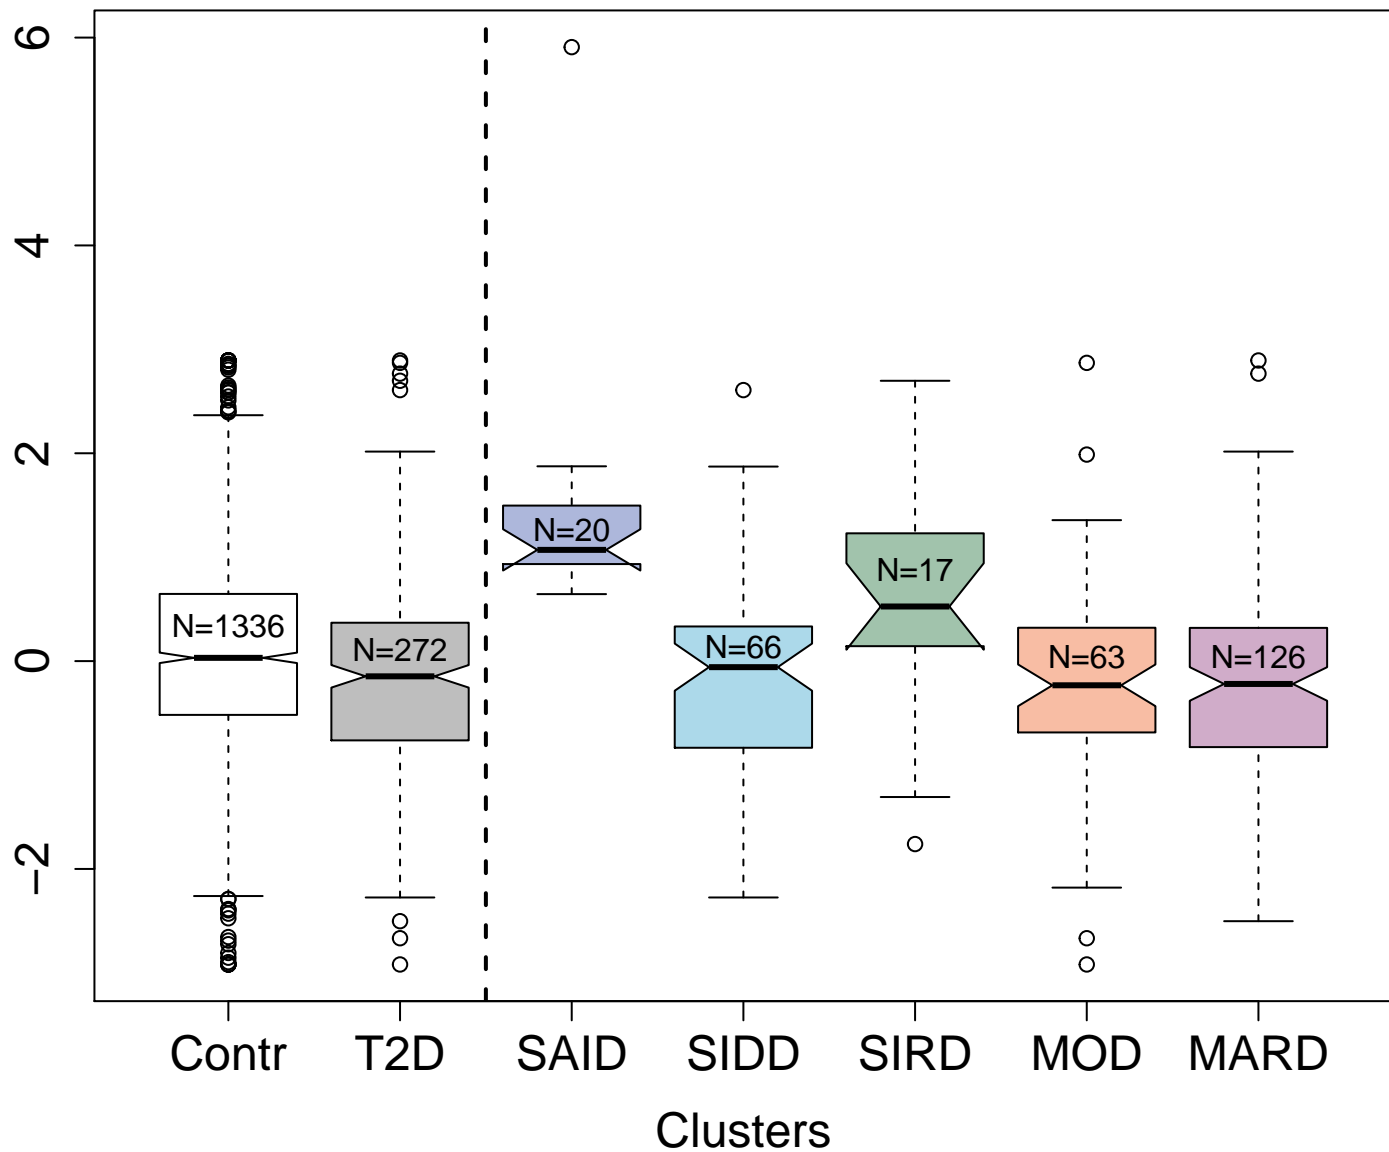

M47773 : X - 22509

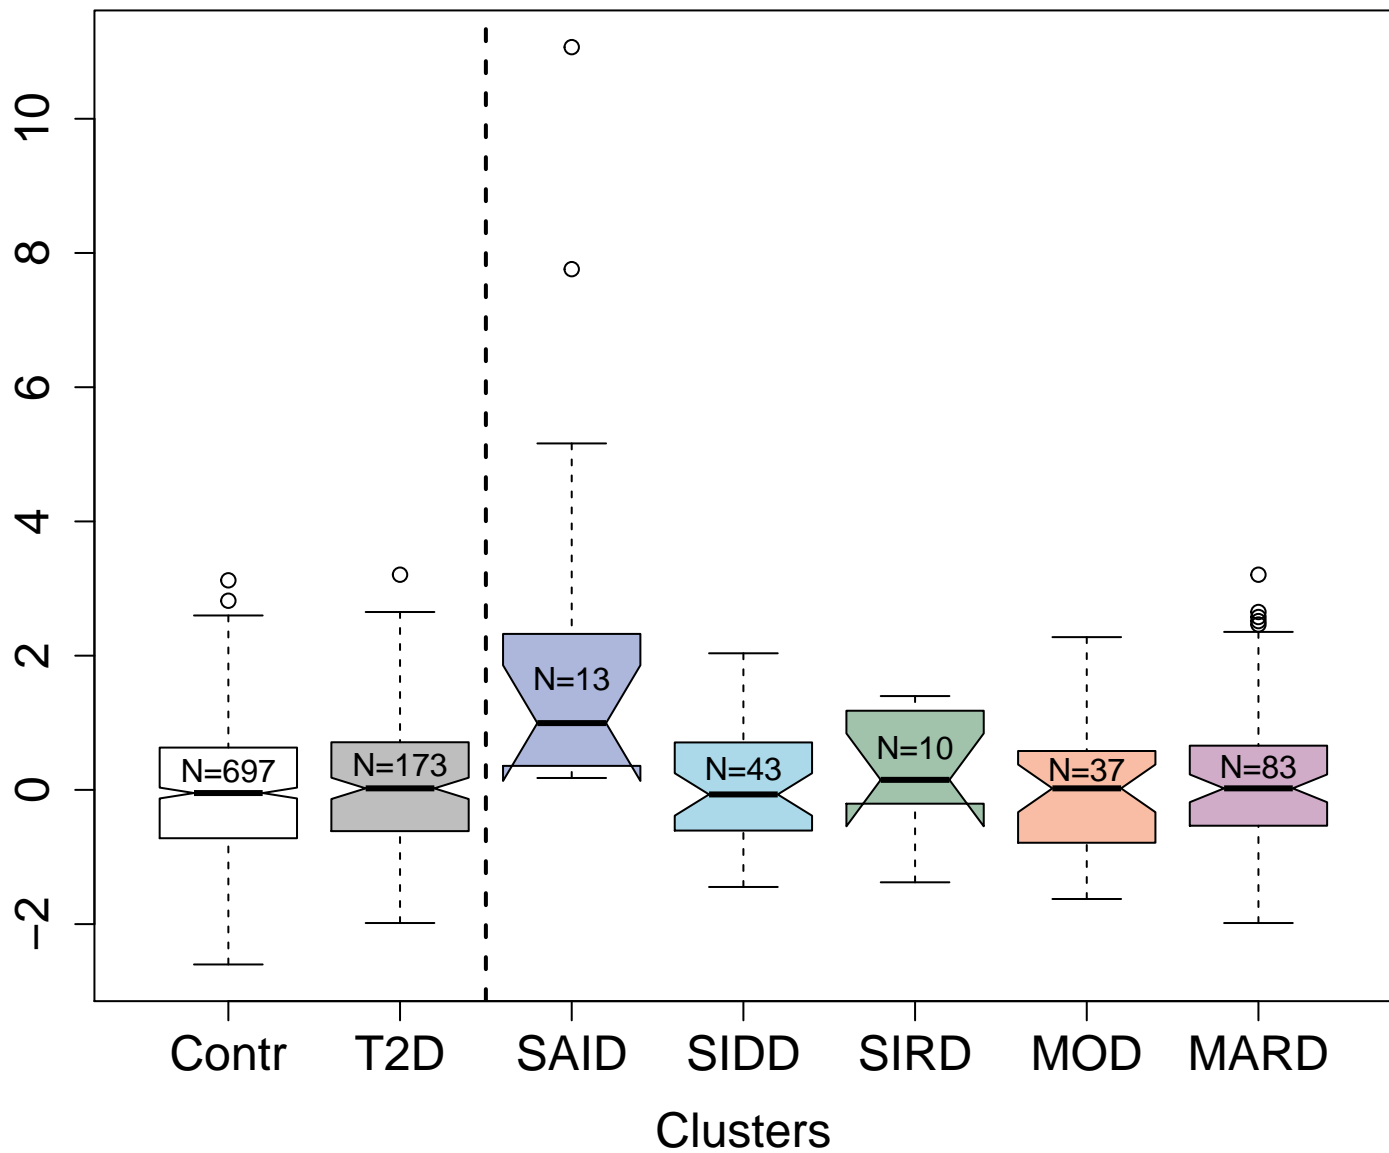

M52867 : X - 24546

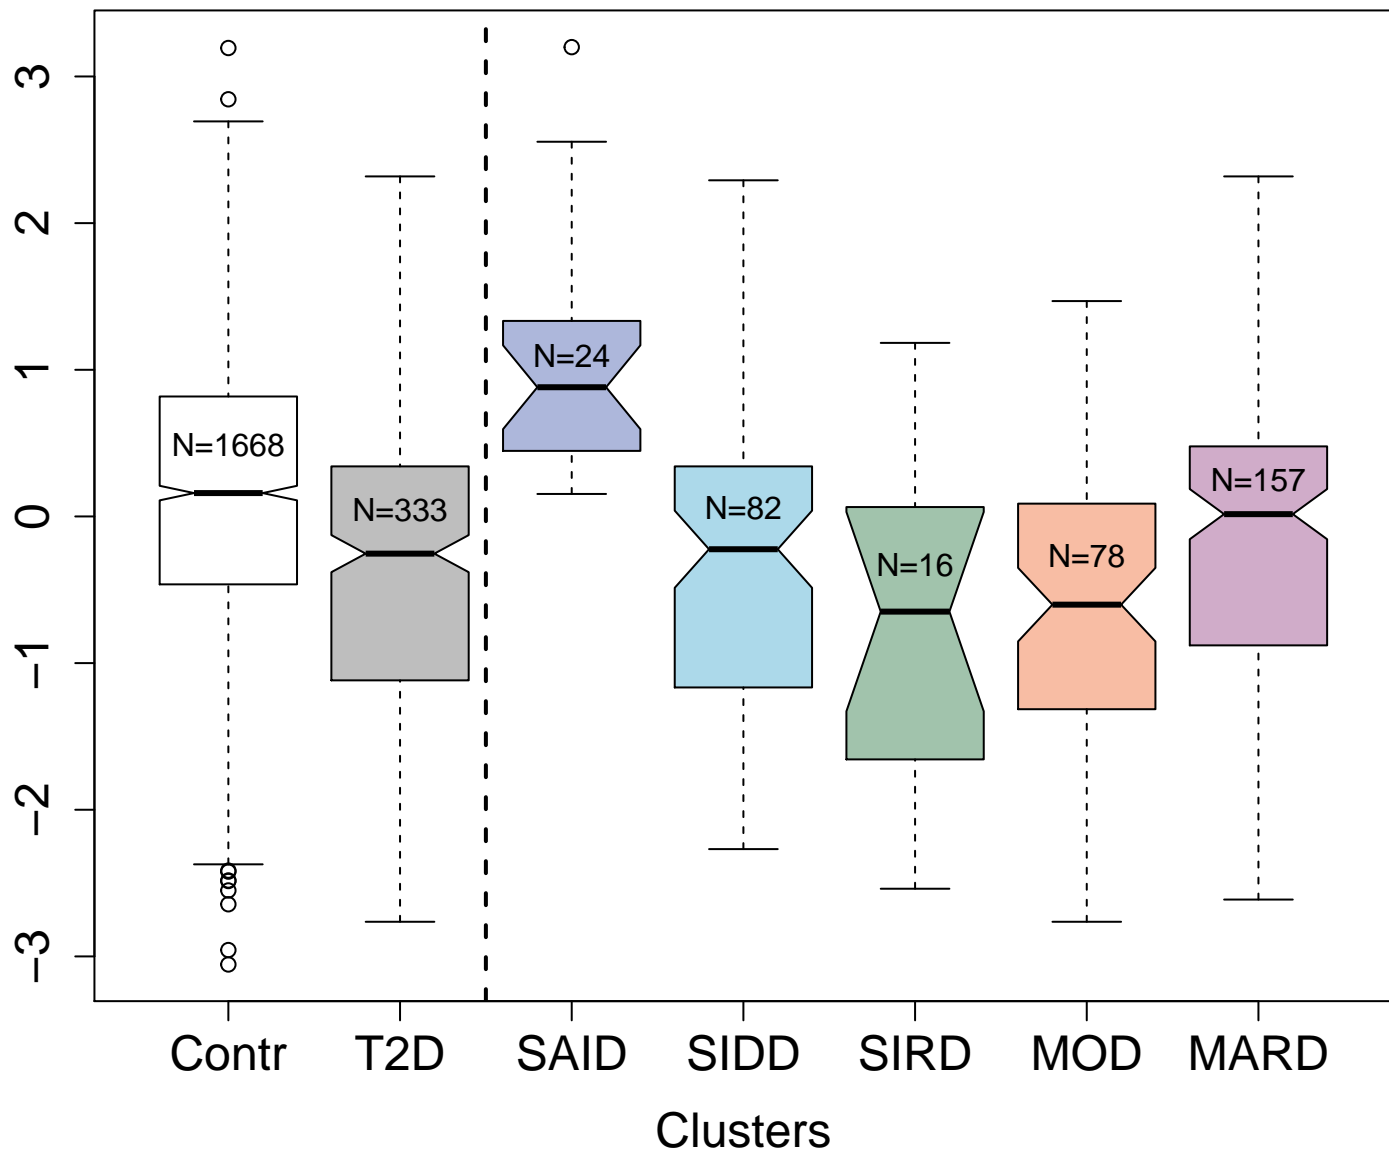

M57720 : X - 24953

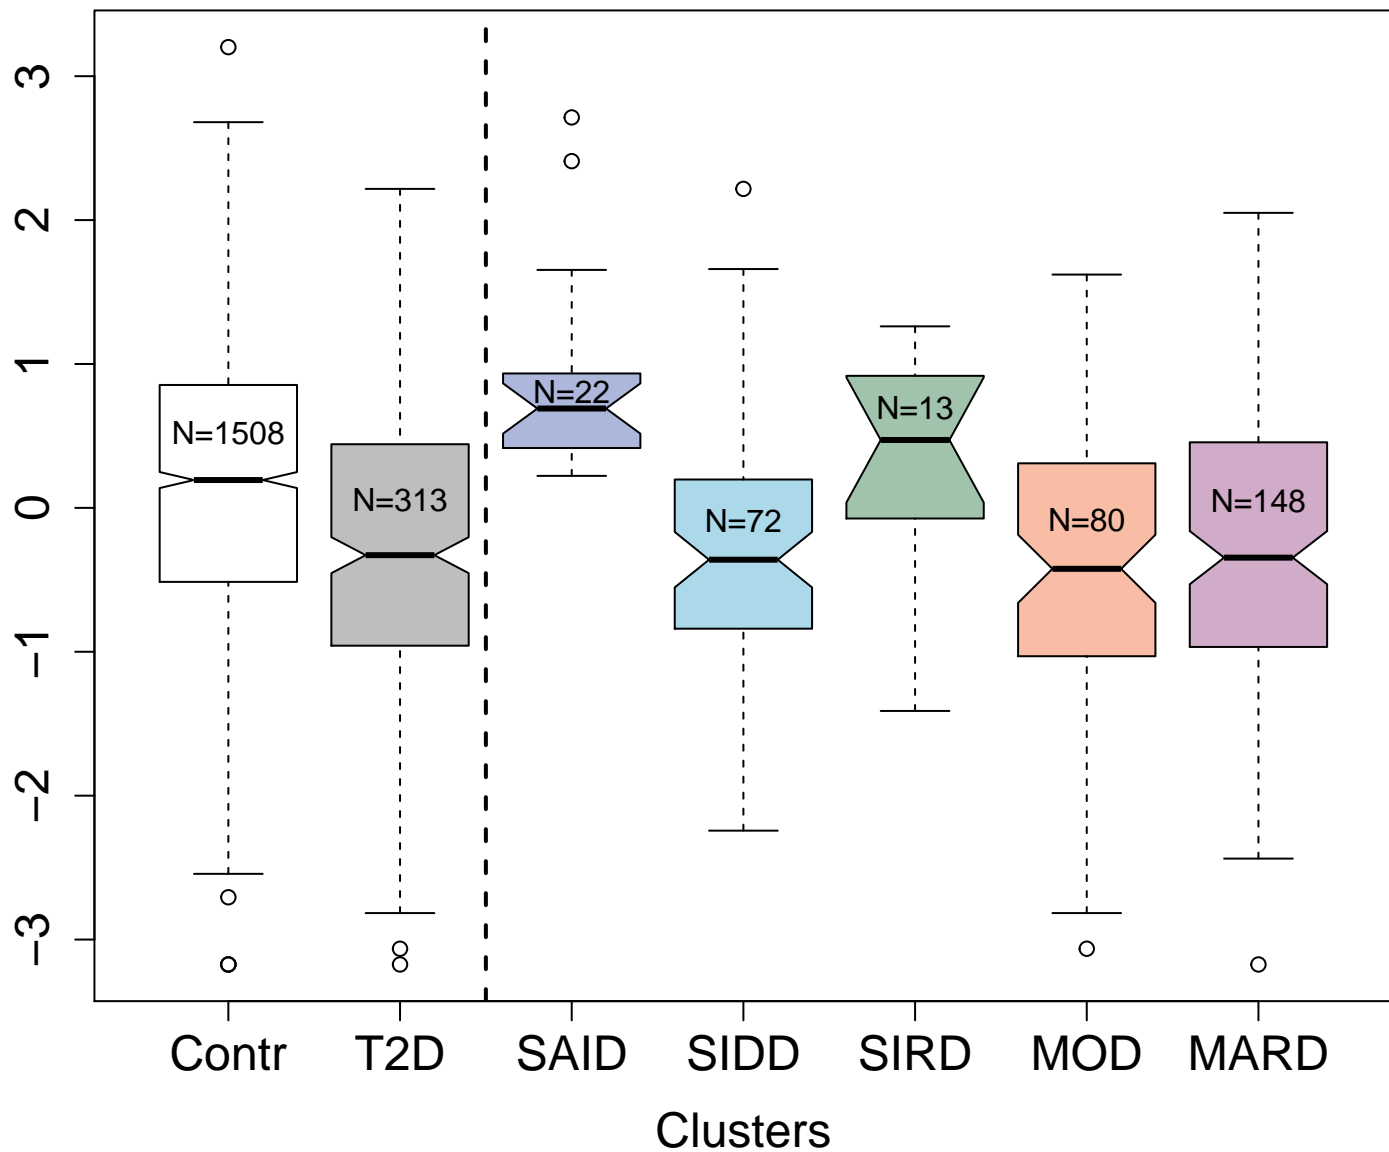



M47493 : X - 11632

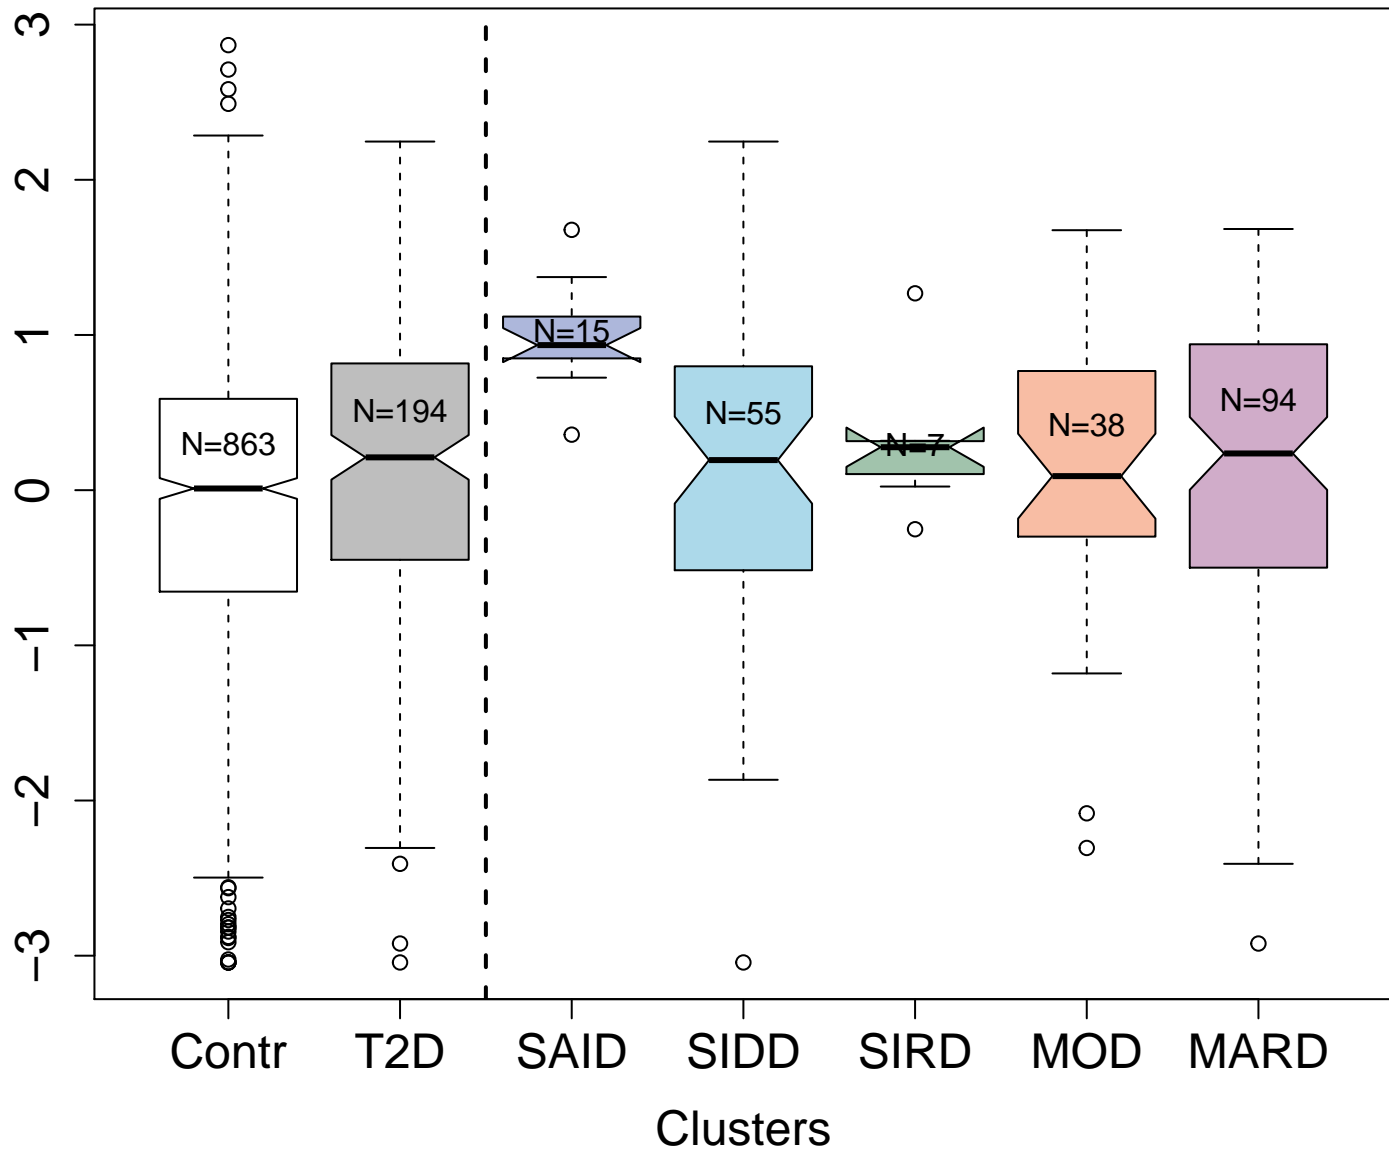

M49617 : 1-lignoceroyl-GPC (24:0)

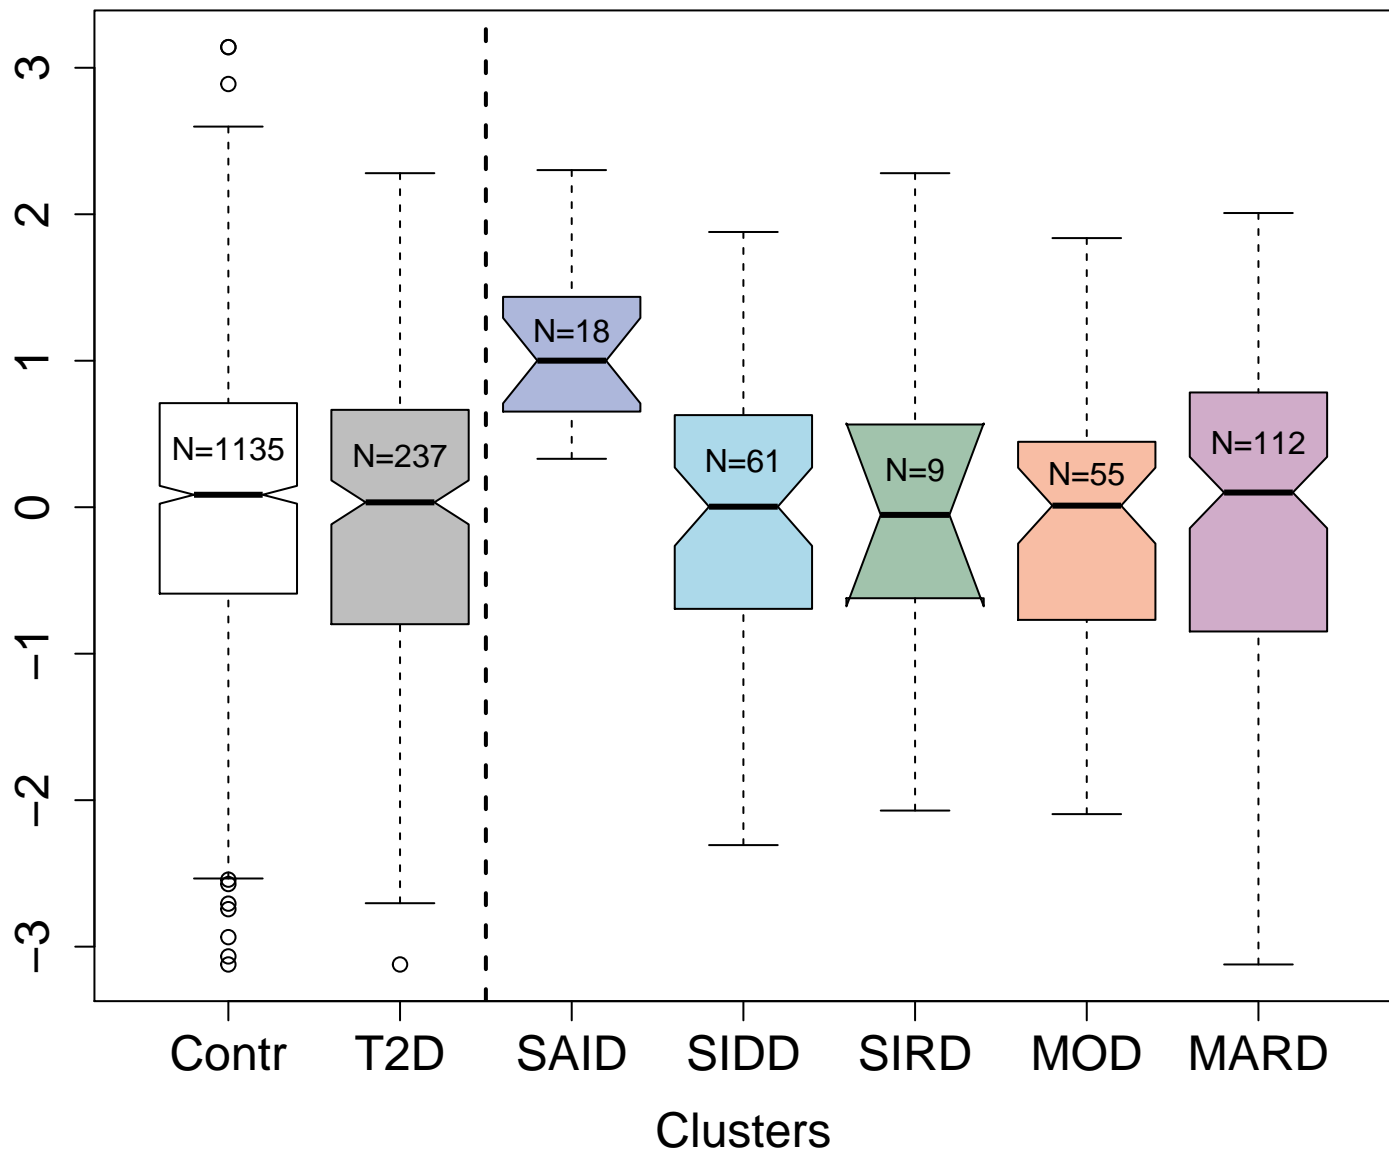

M52690 : 1-linoleoyl-GPA (18:2)\*

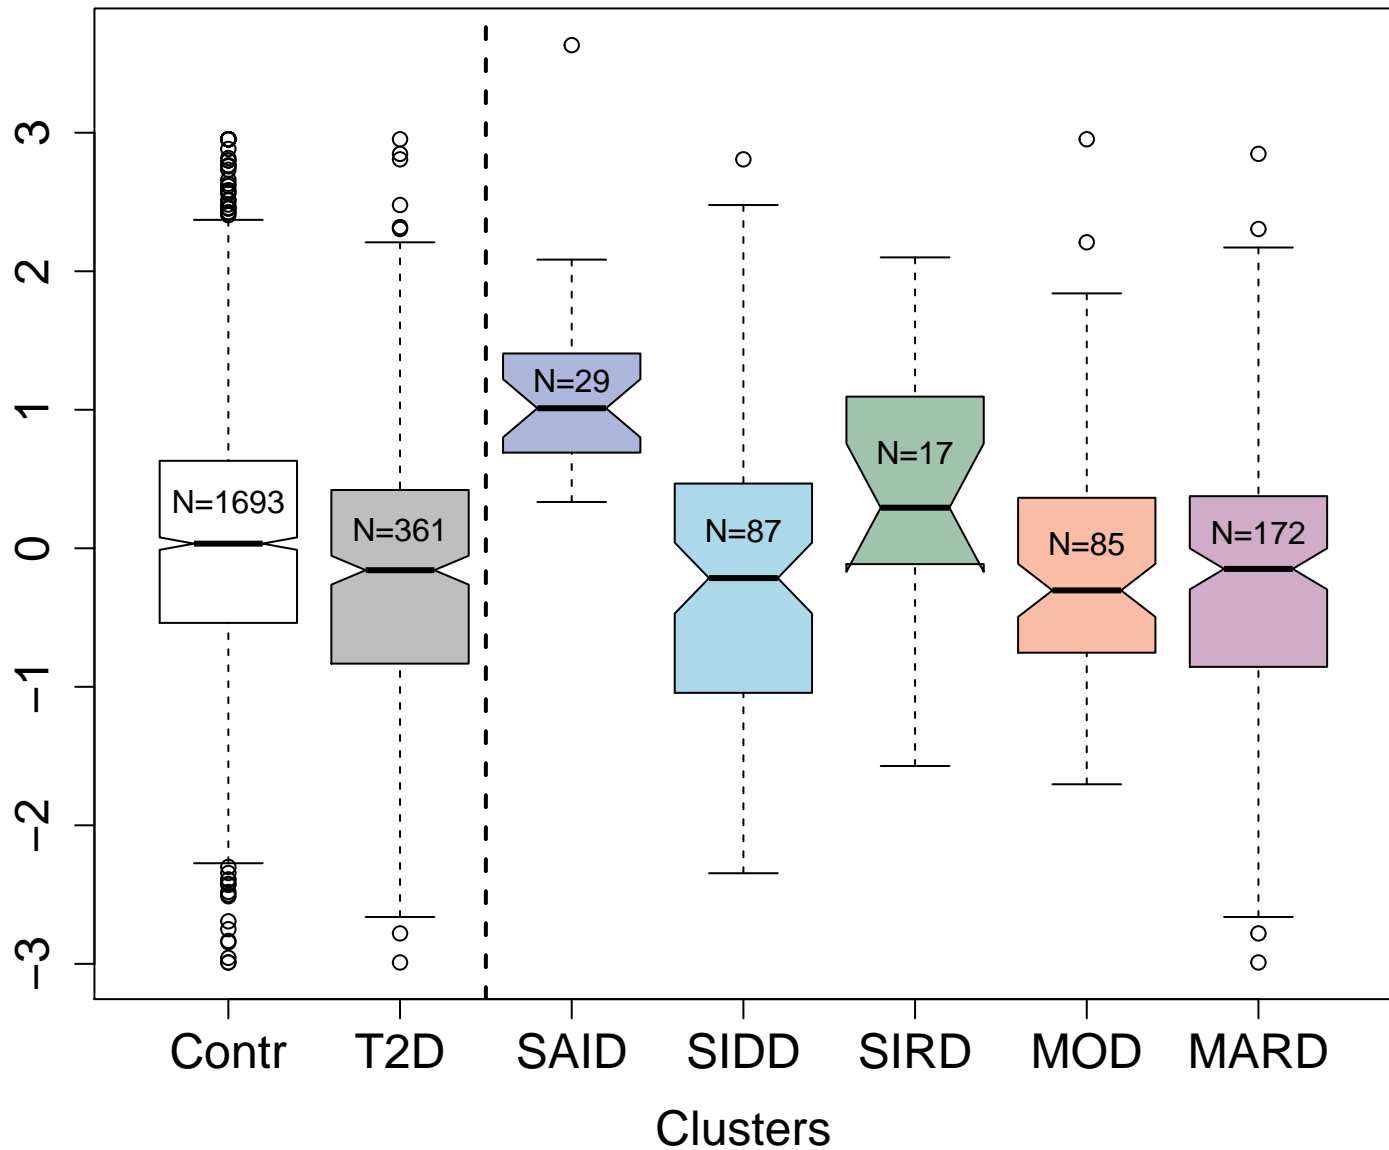

M46630 : X - 12816

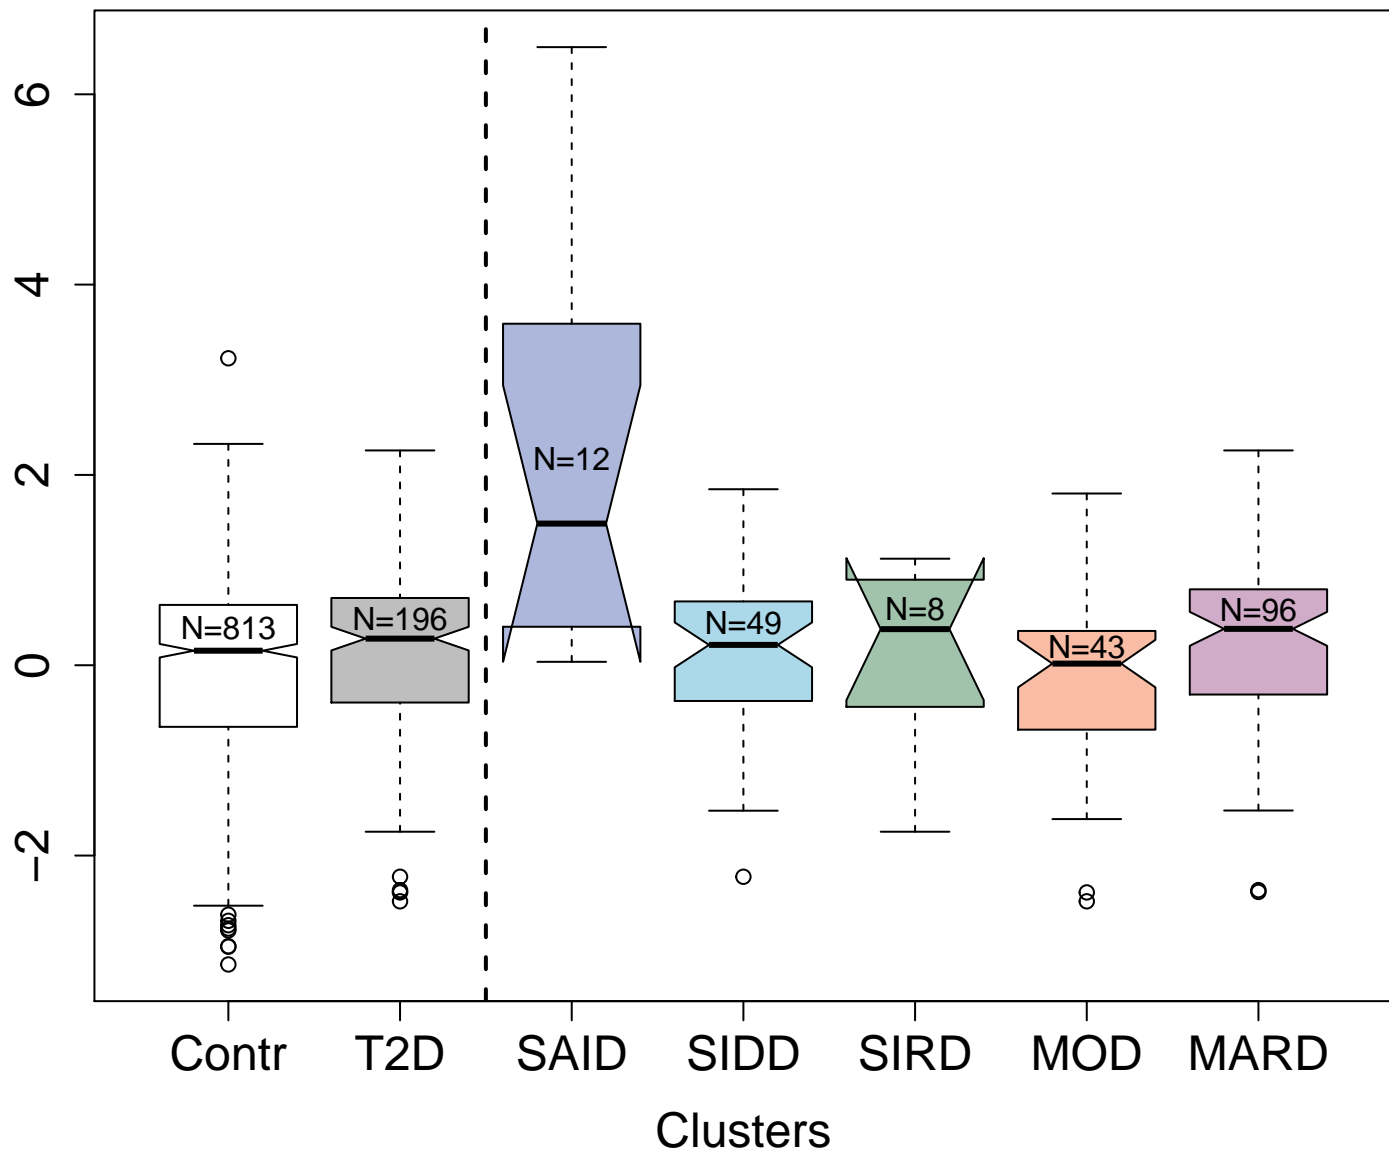

M49681 : X - 23782

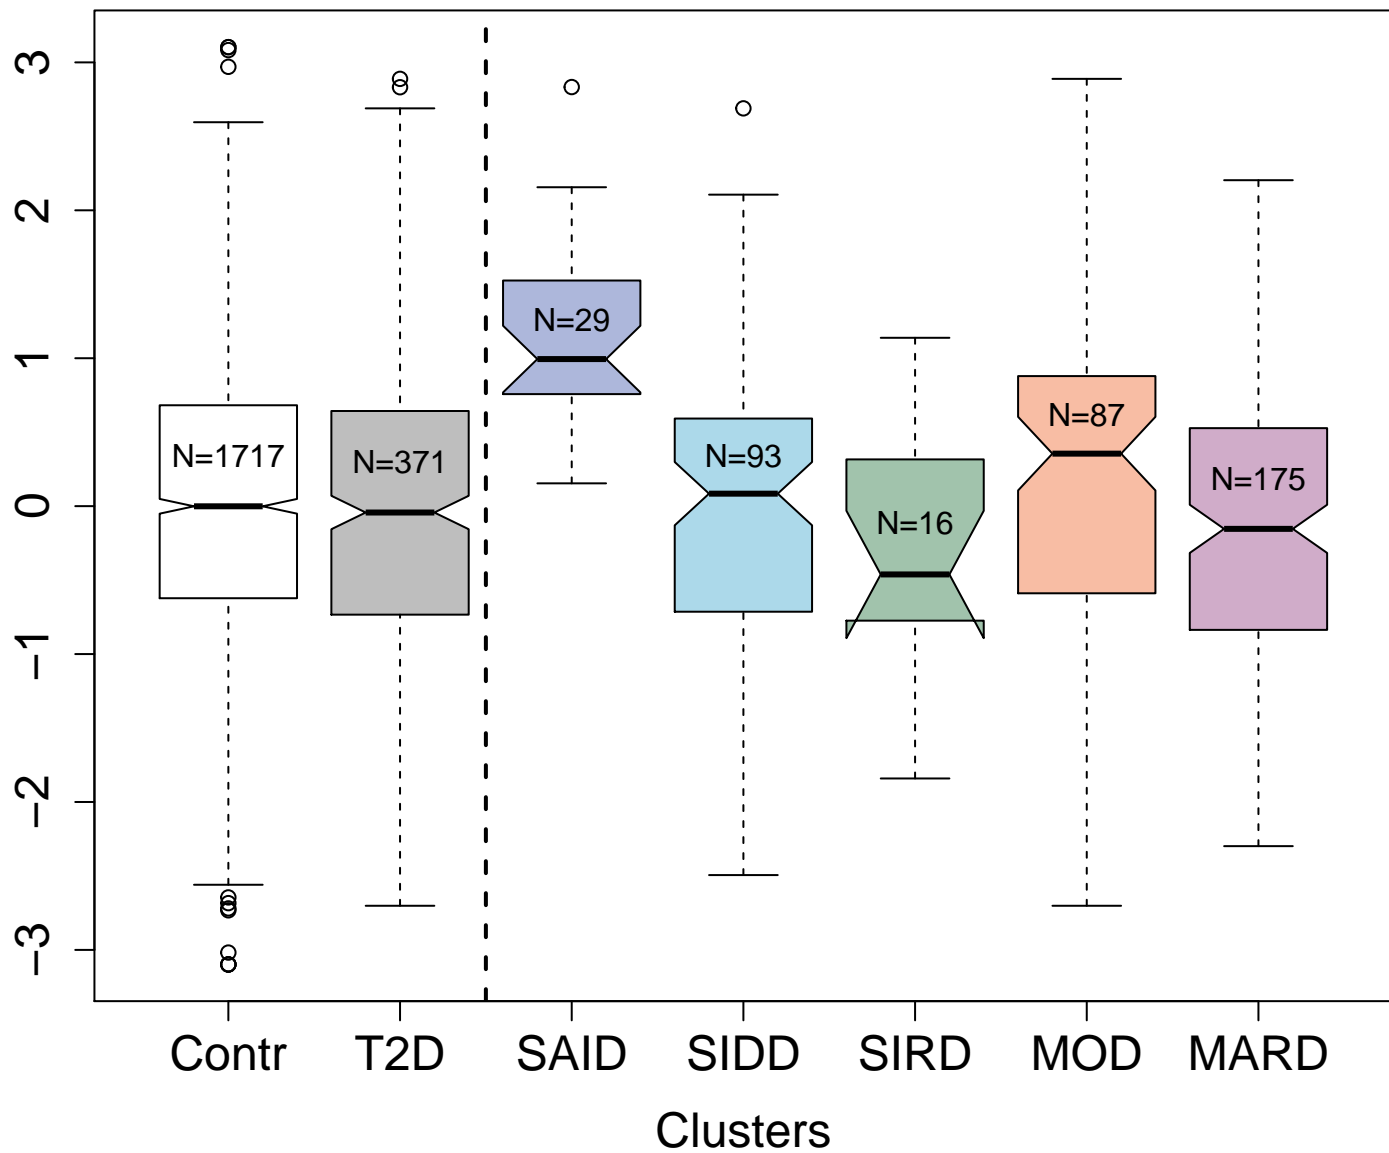

M35718 : dihydro-linolenate (20:3n3 or n6)

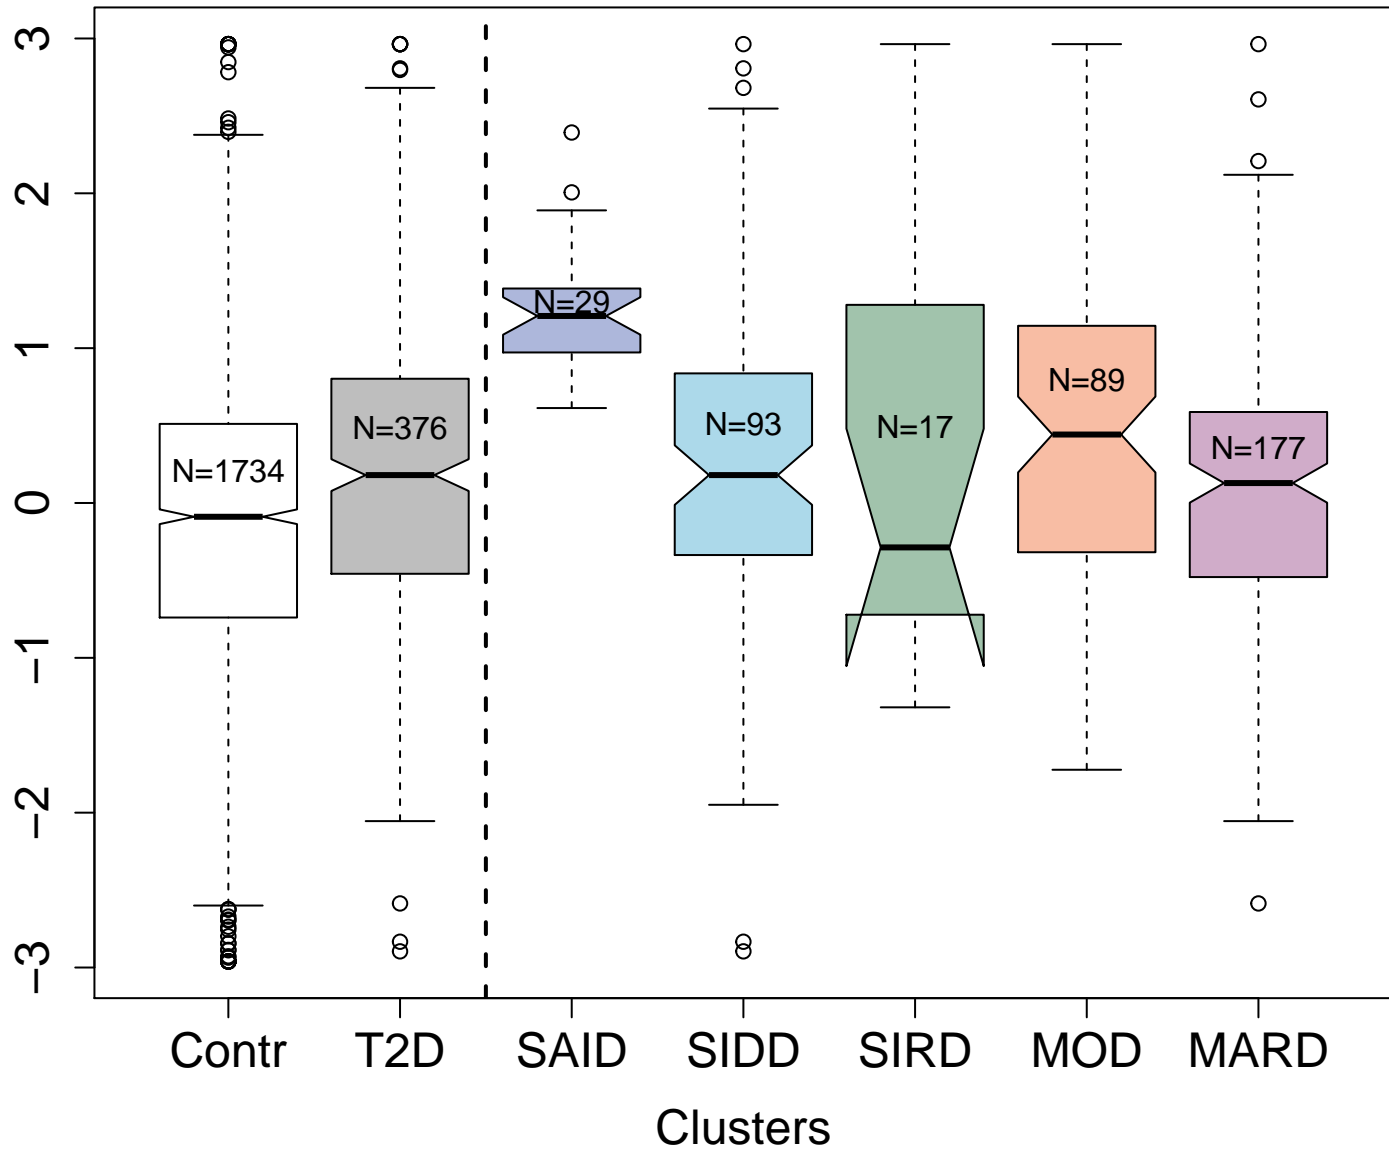

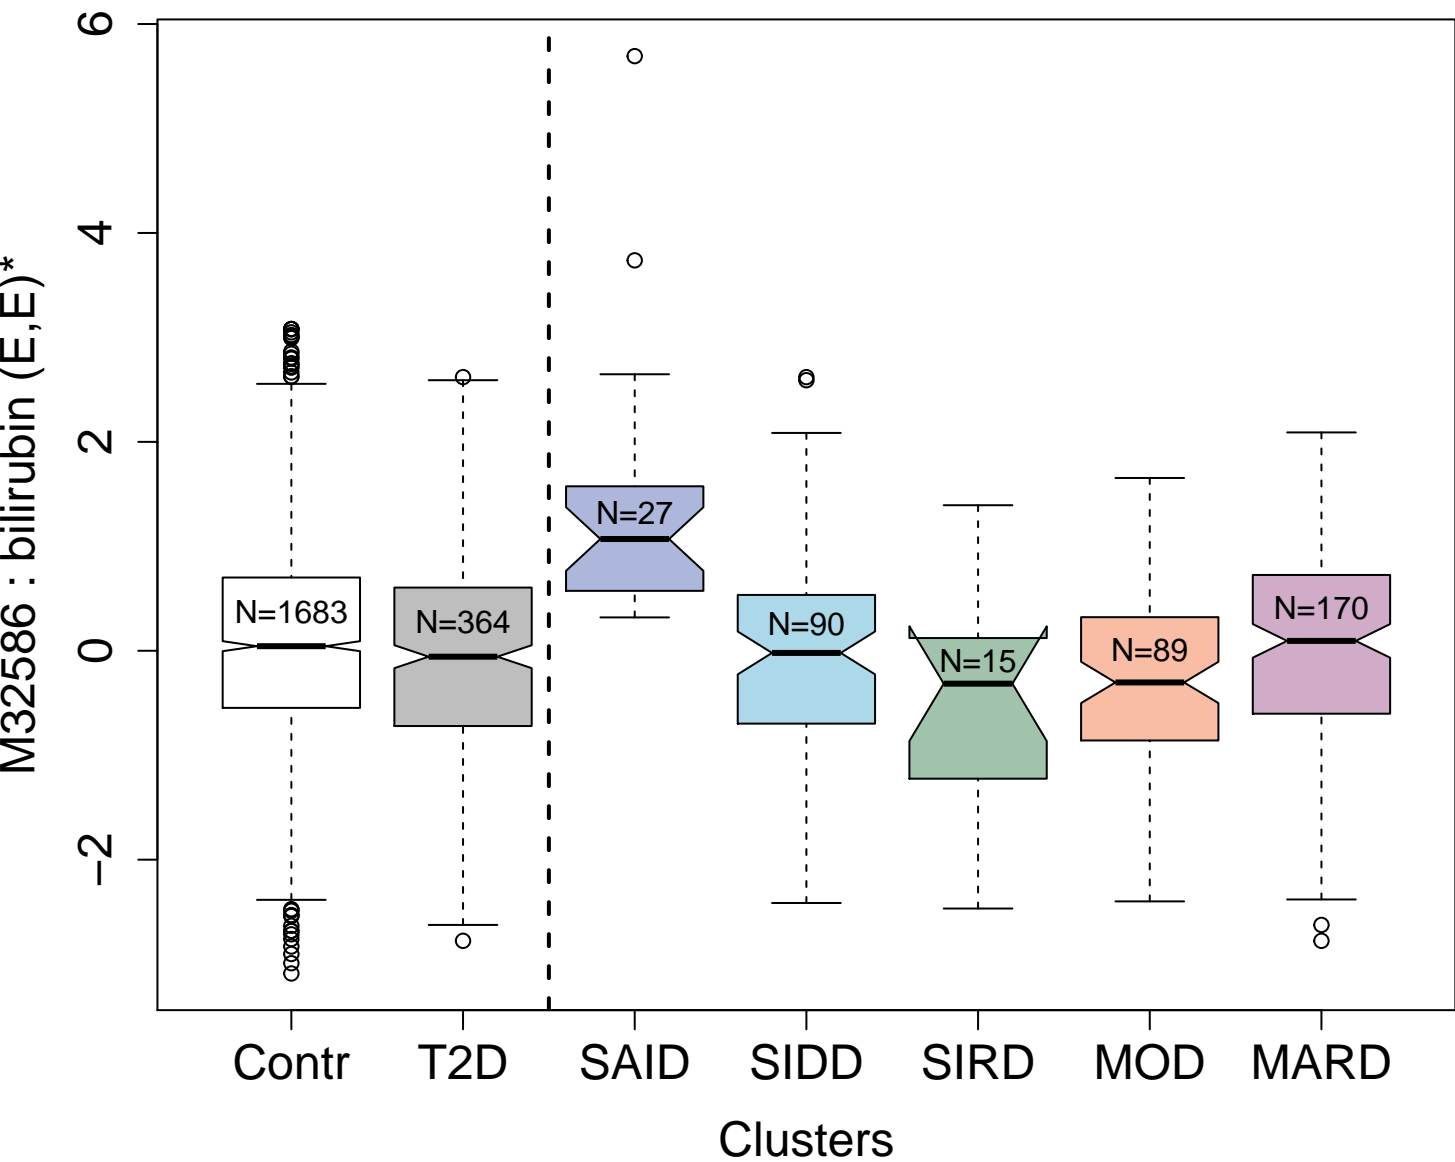

M38619 : atorvastatin (lipitor)

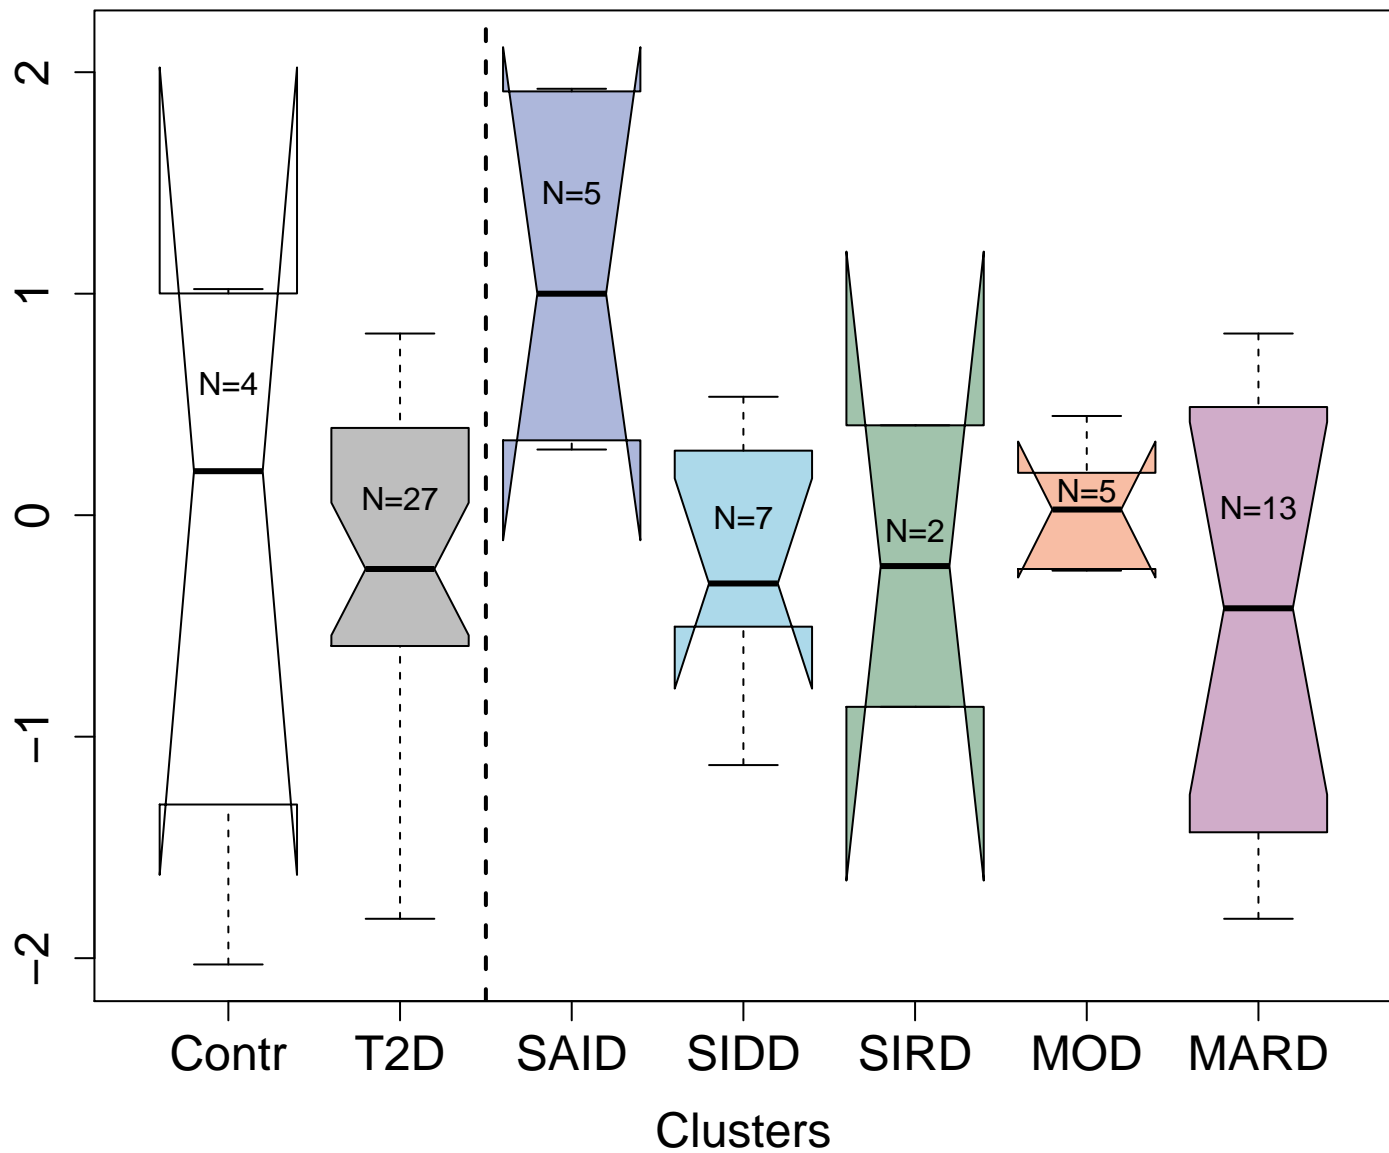



M1432 : 2-hydroxyphenylacetate

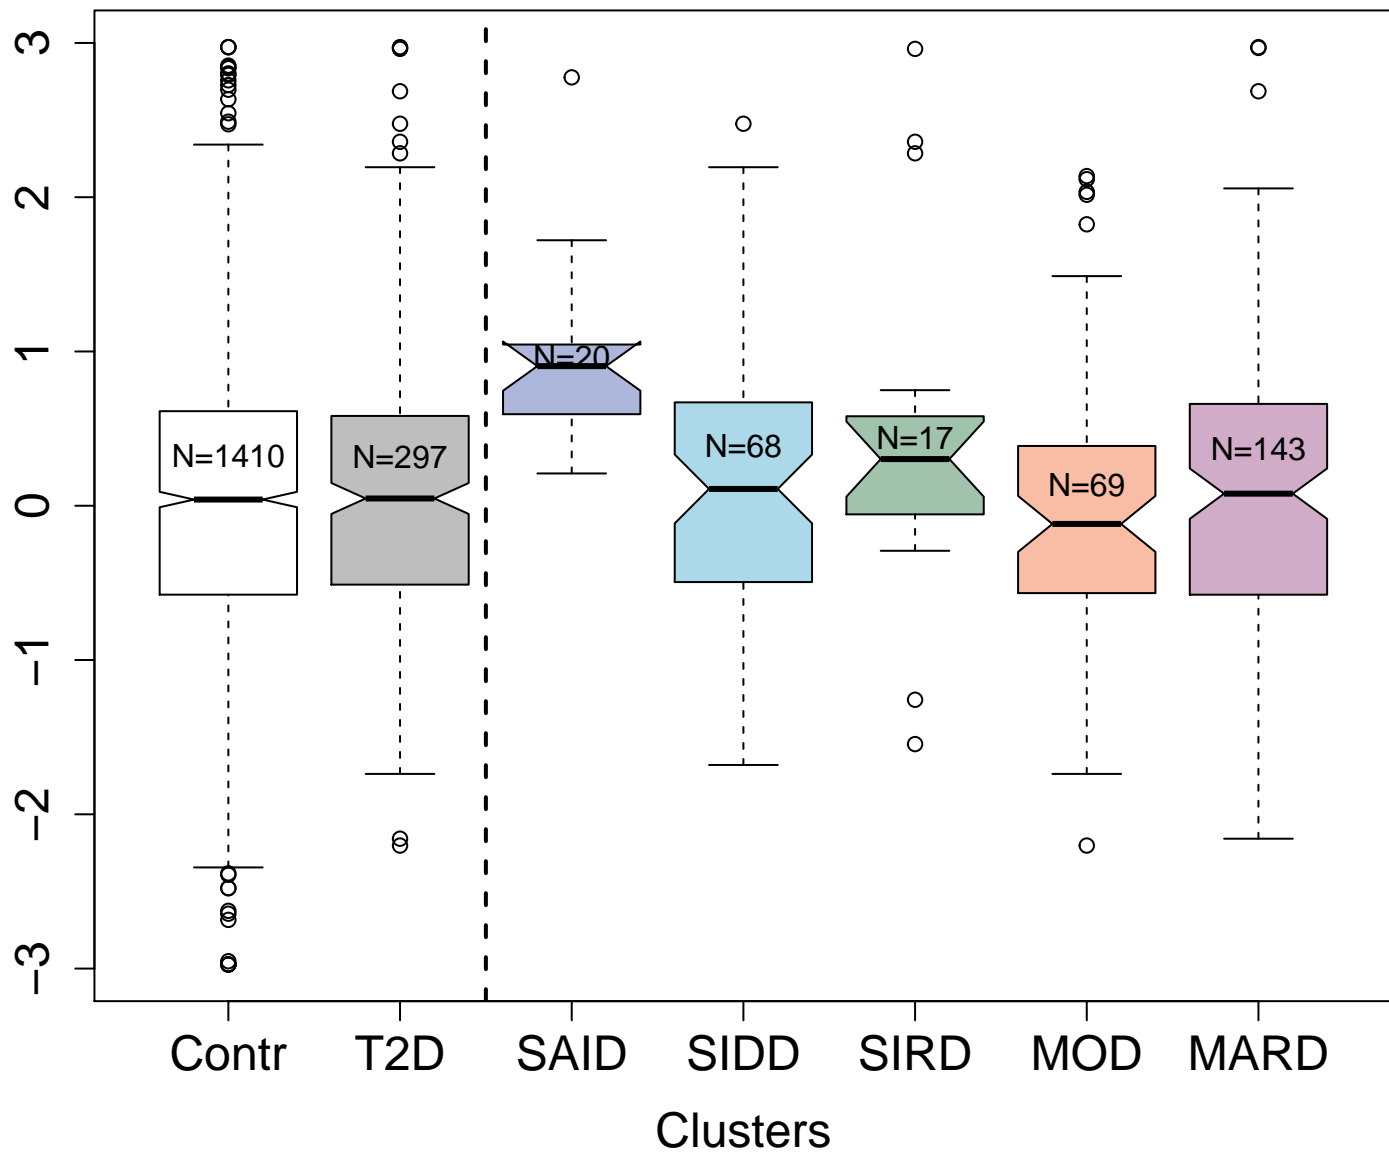

M437 : 5-hydroxyindoleacetate

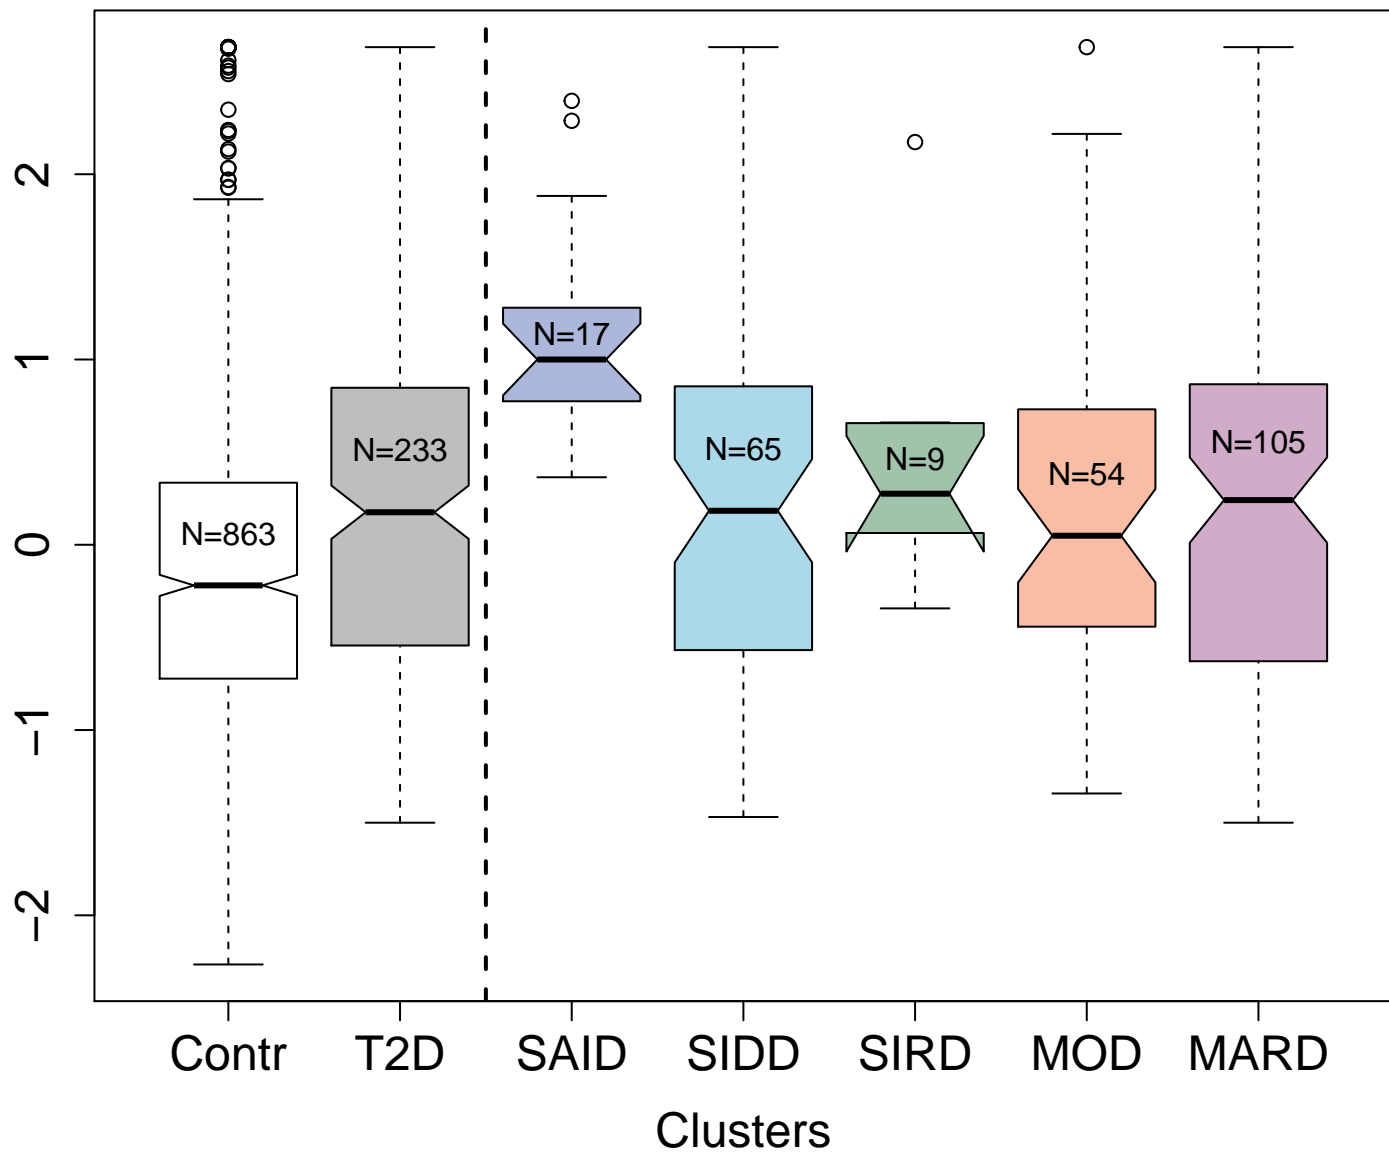

M45095 : 2-methylbutyrylcarnitine (C5)

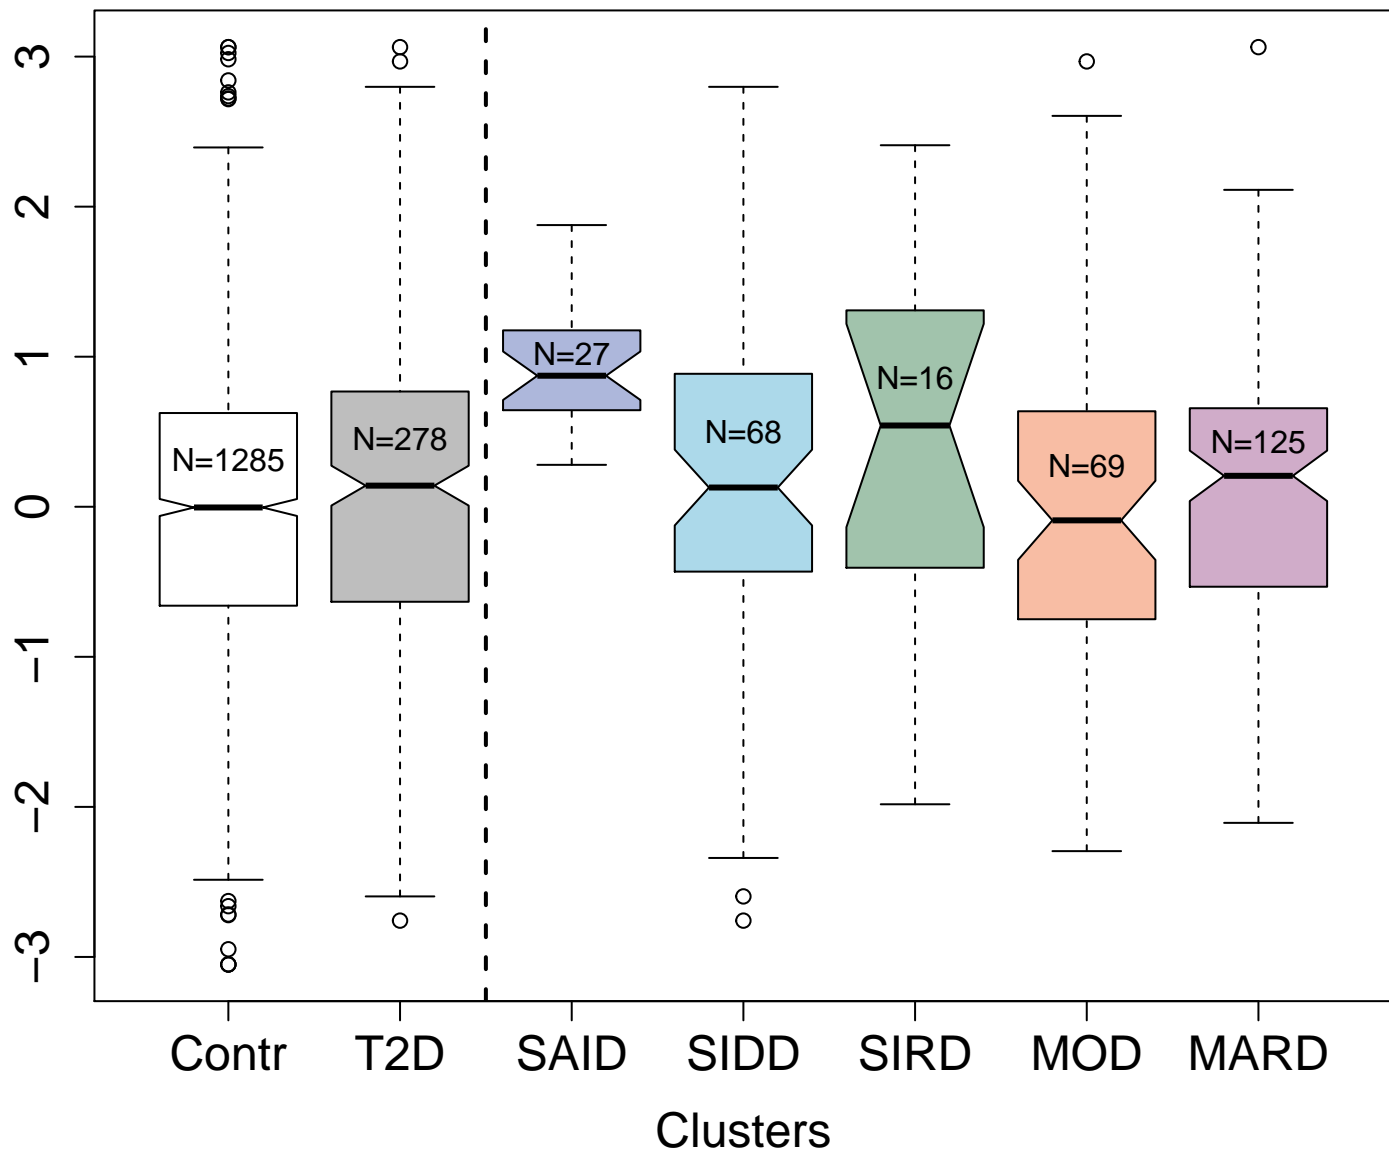

M32425 : dehydroepiandrosterone sulfate (DHEA-S)

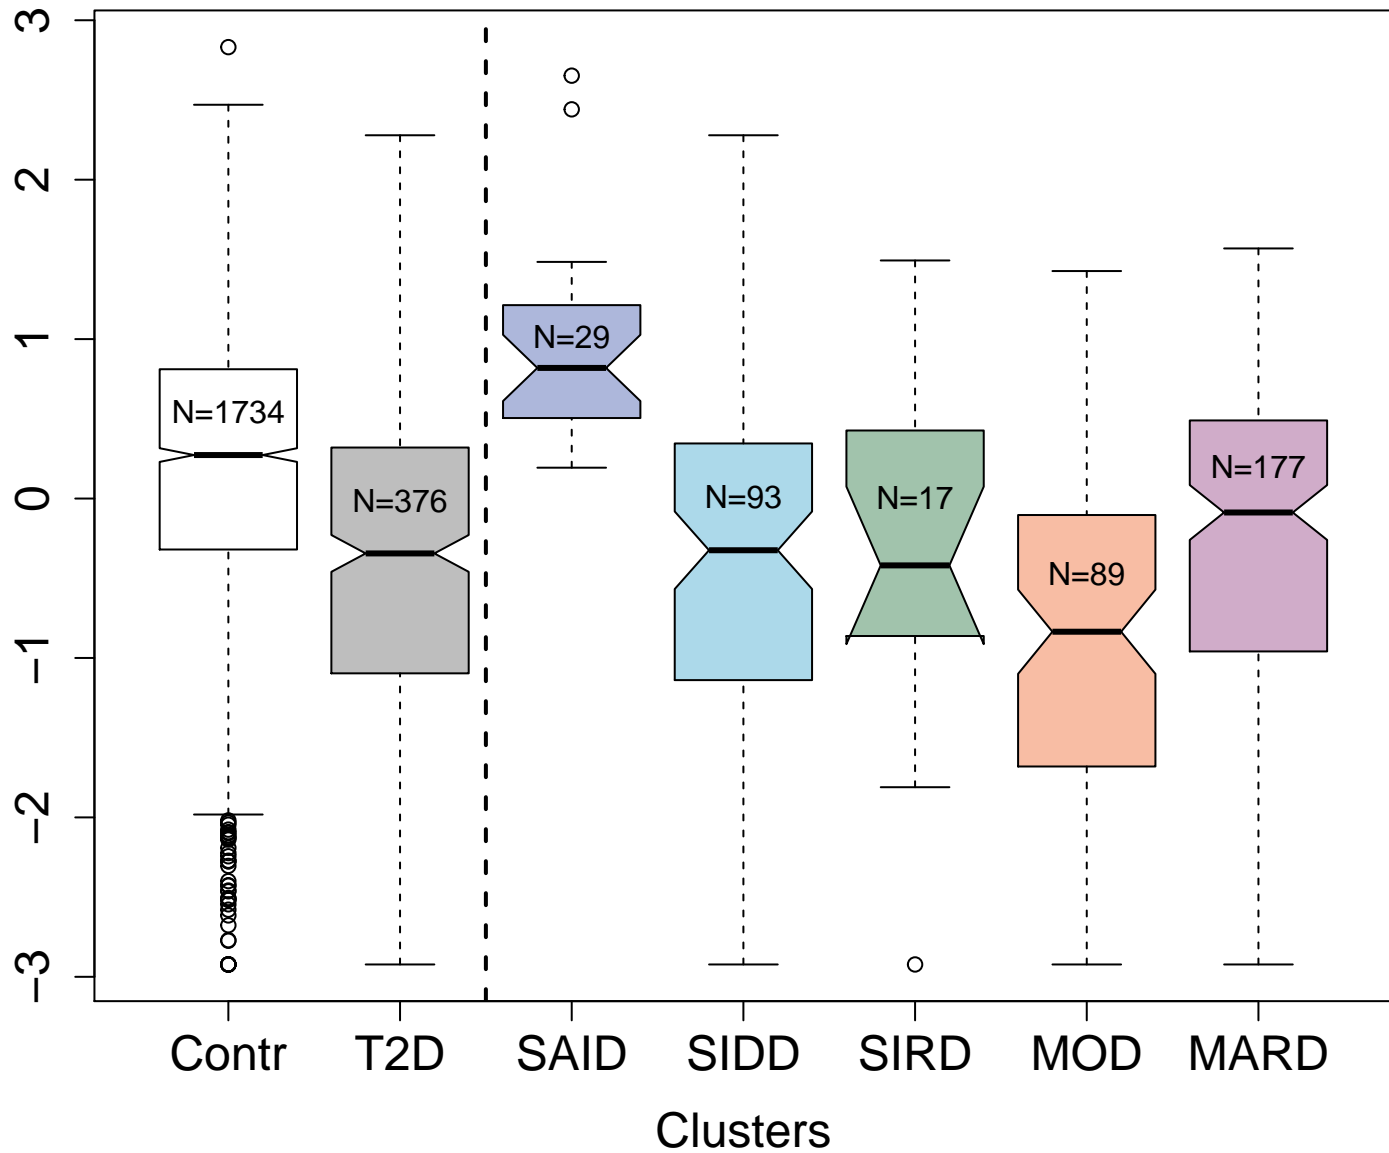

M52983 : glycochenoxycholate glucuronide (1)

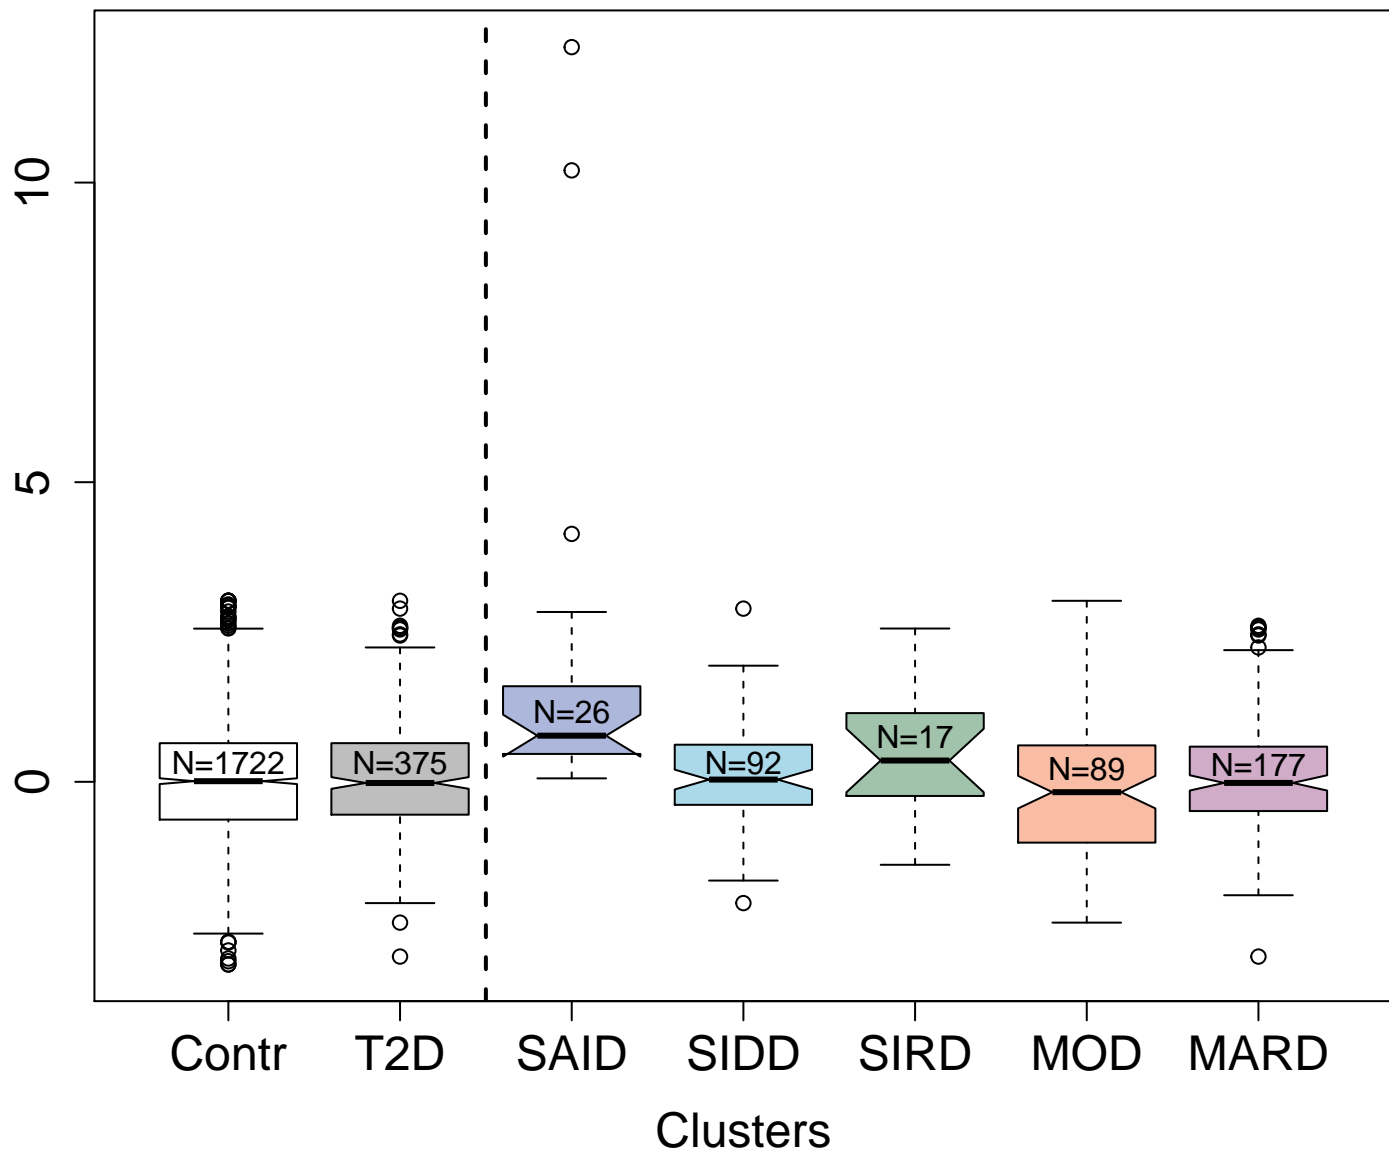

M48107 : X - 22802

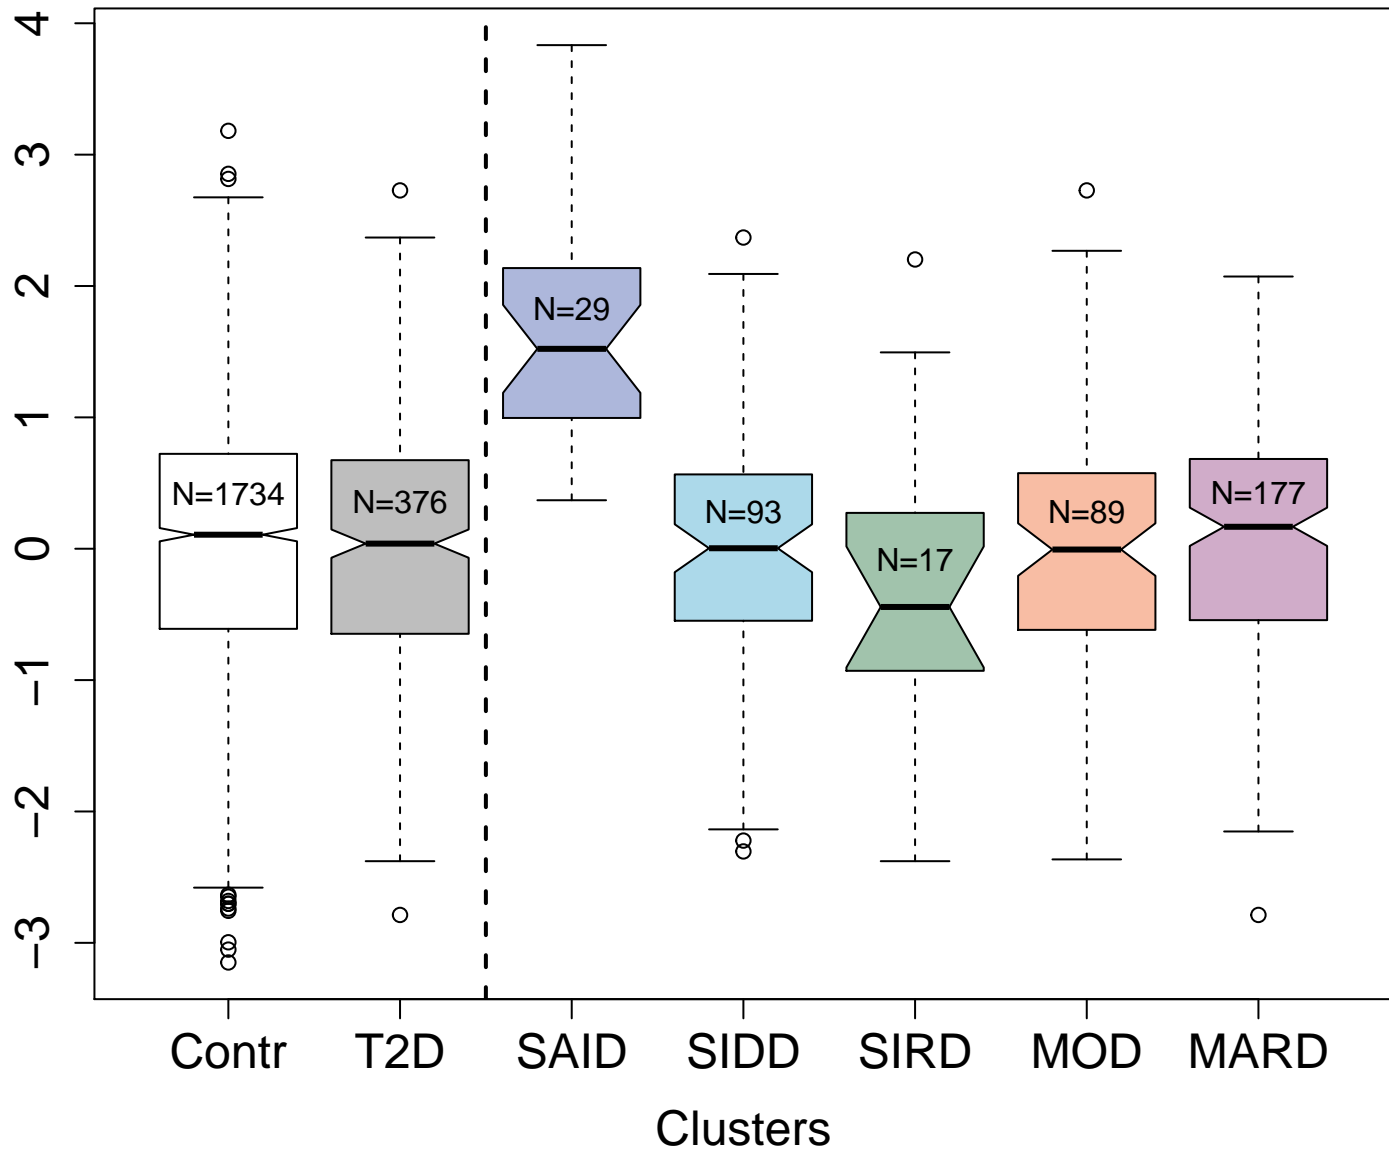

M42574 : glycohychoilate

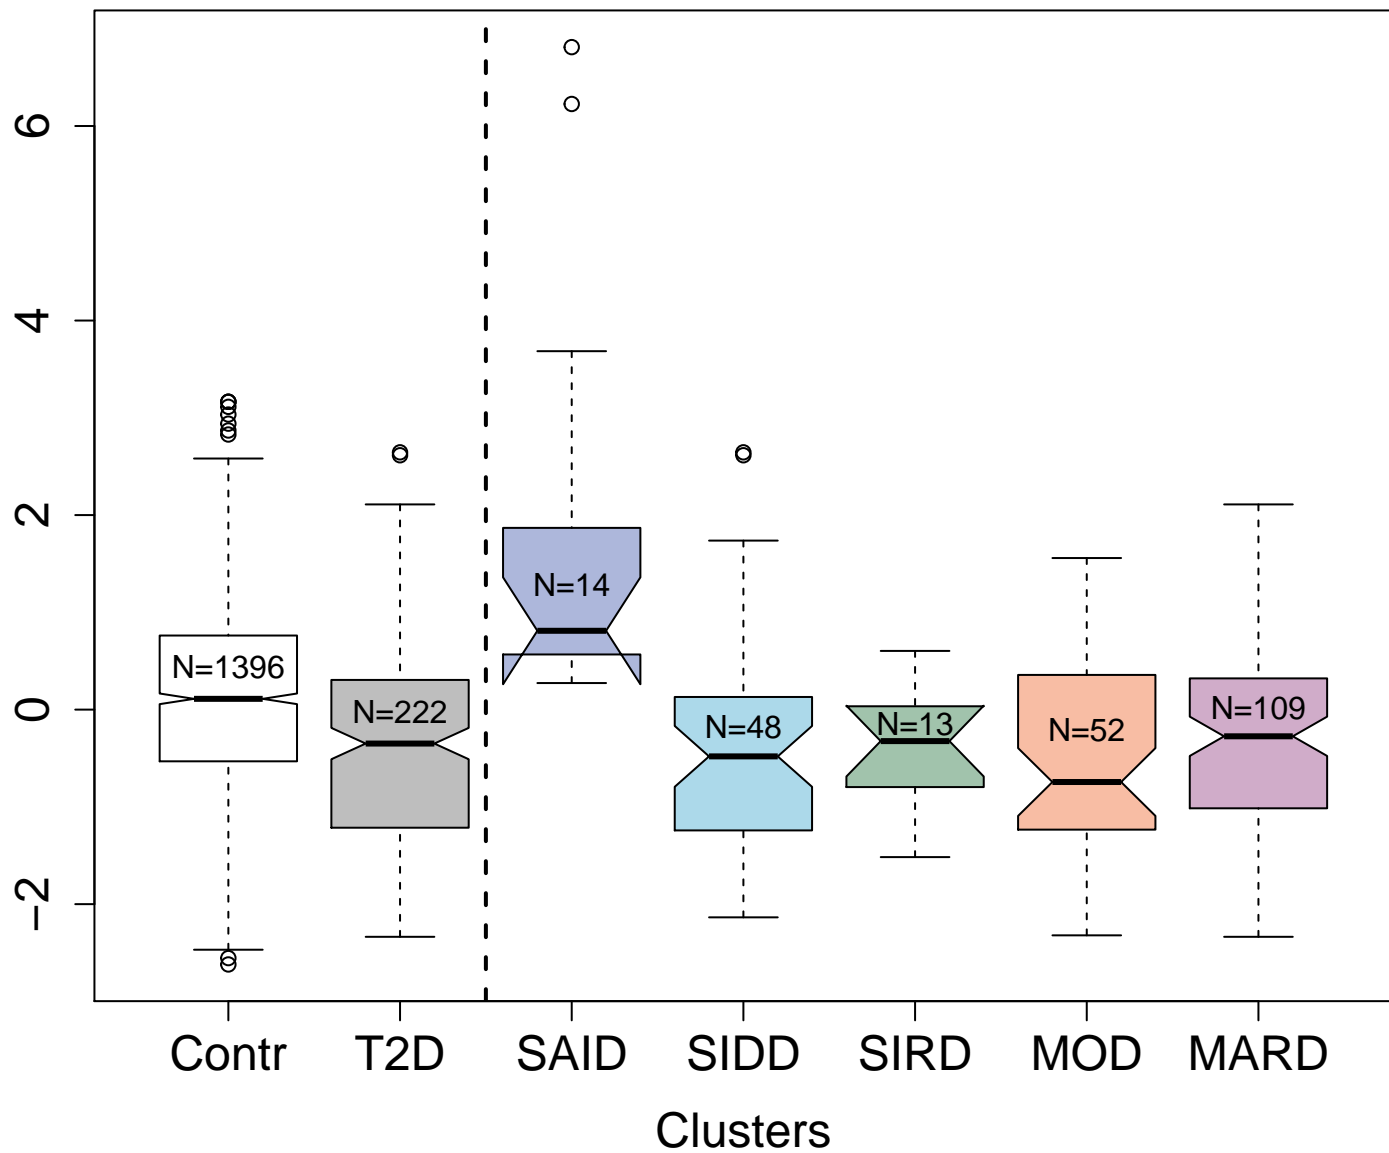

M46674 : X - 21607

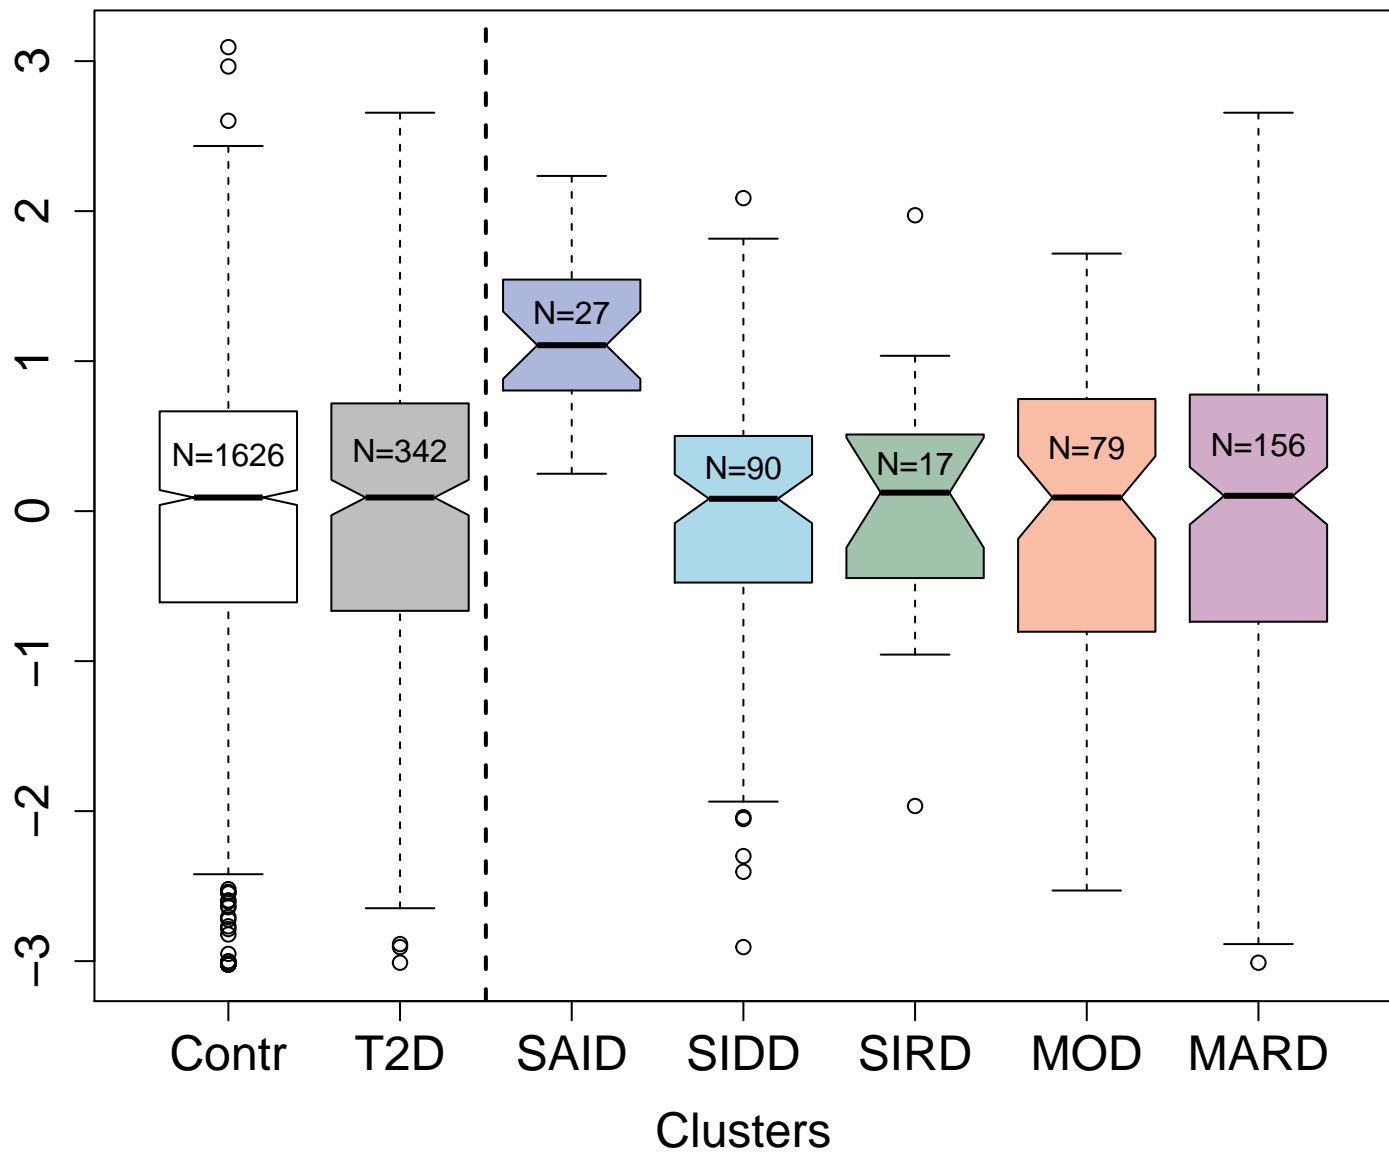



M44620 : 4-acetylphenol sulfate

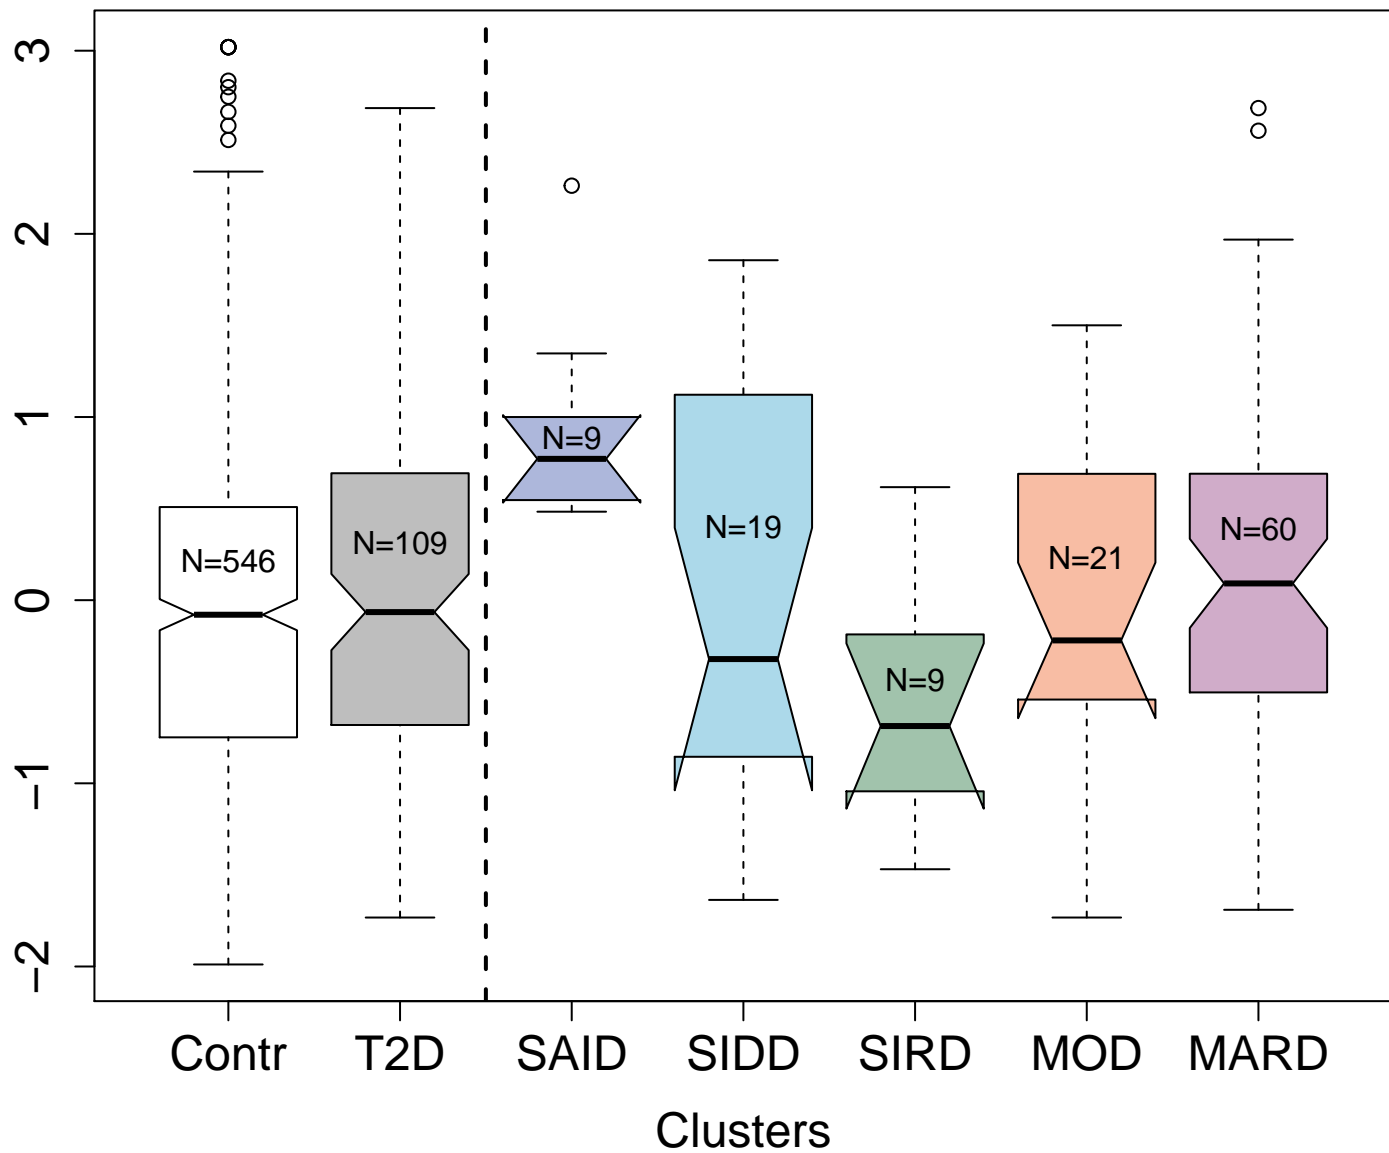

M38309 : 4-hydroxynonenal

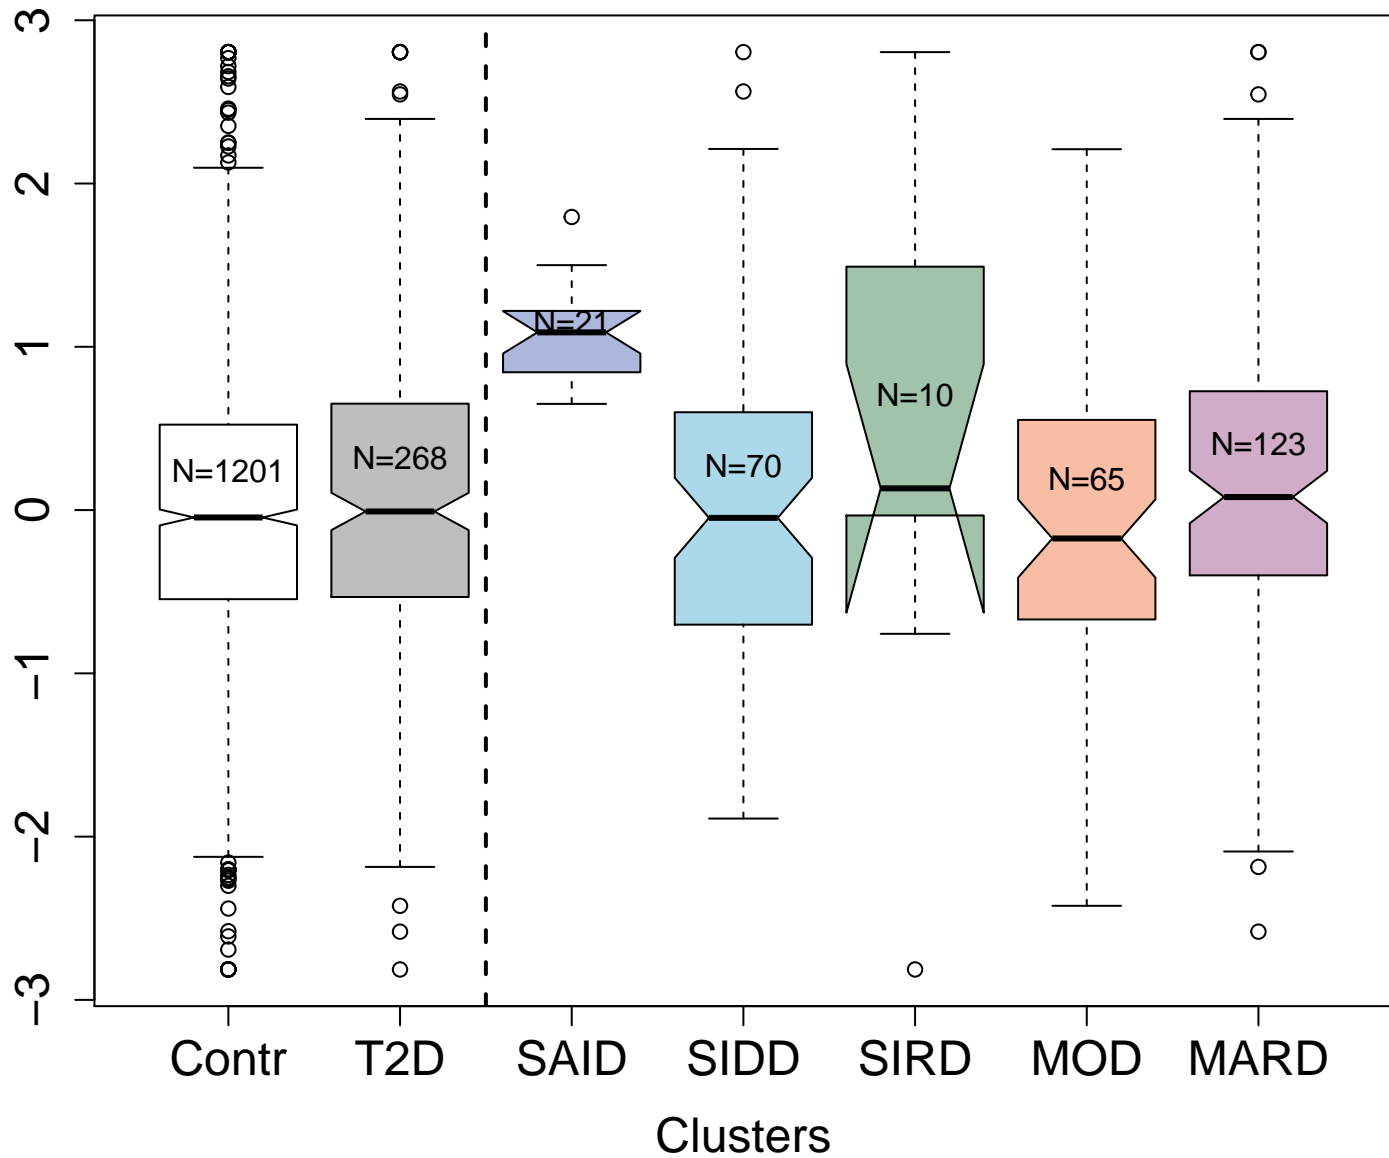

M34404 : 1,3,7-trimethylurate

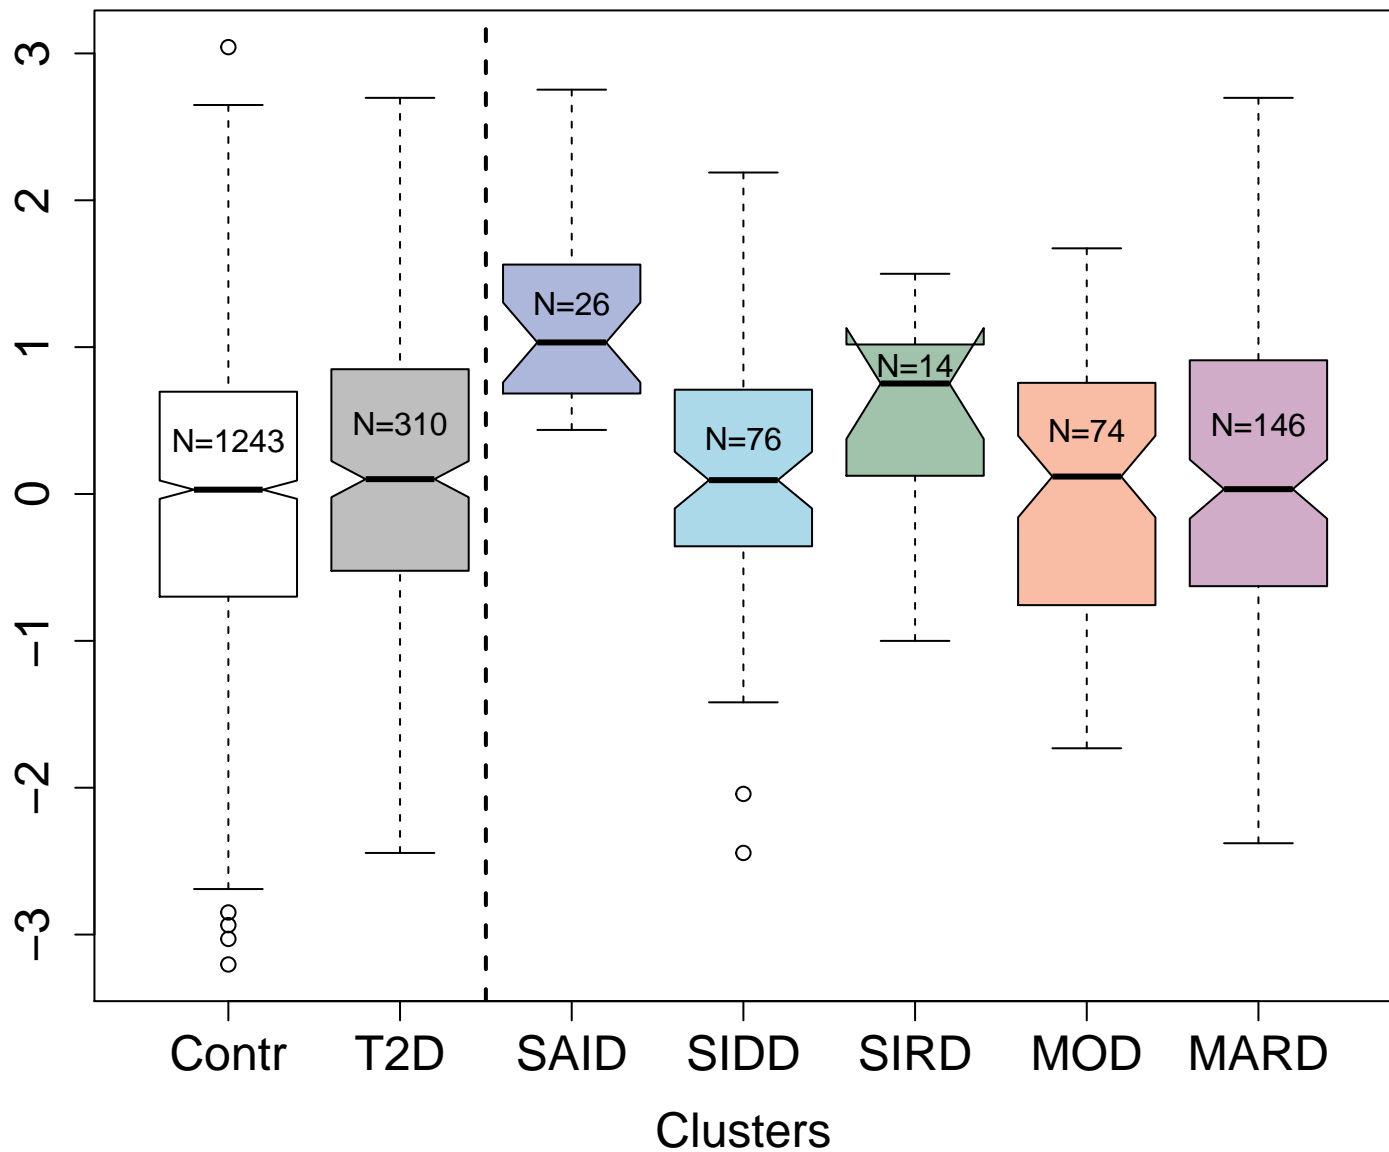

M43343 : 2-aminooctanoate

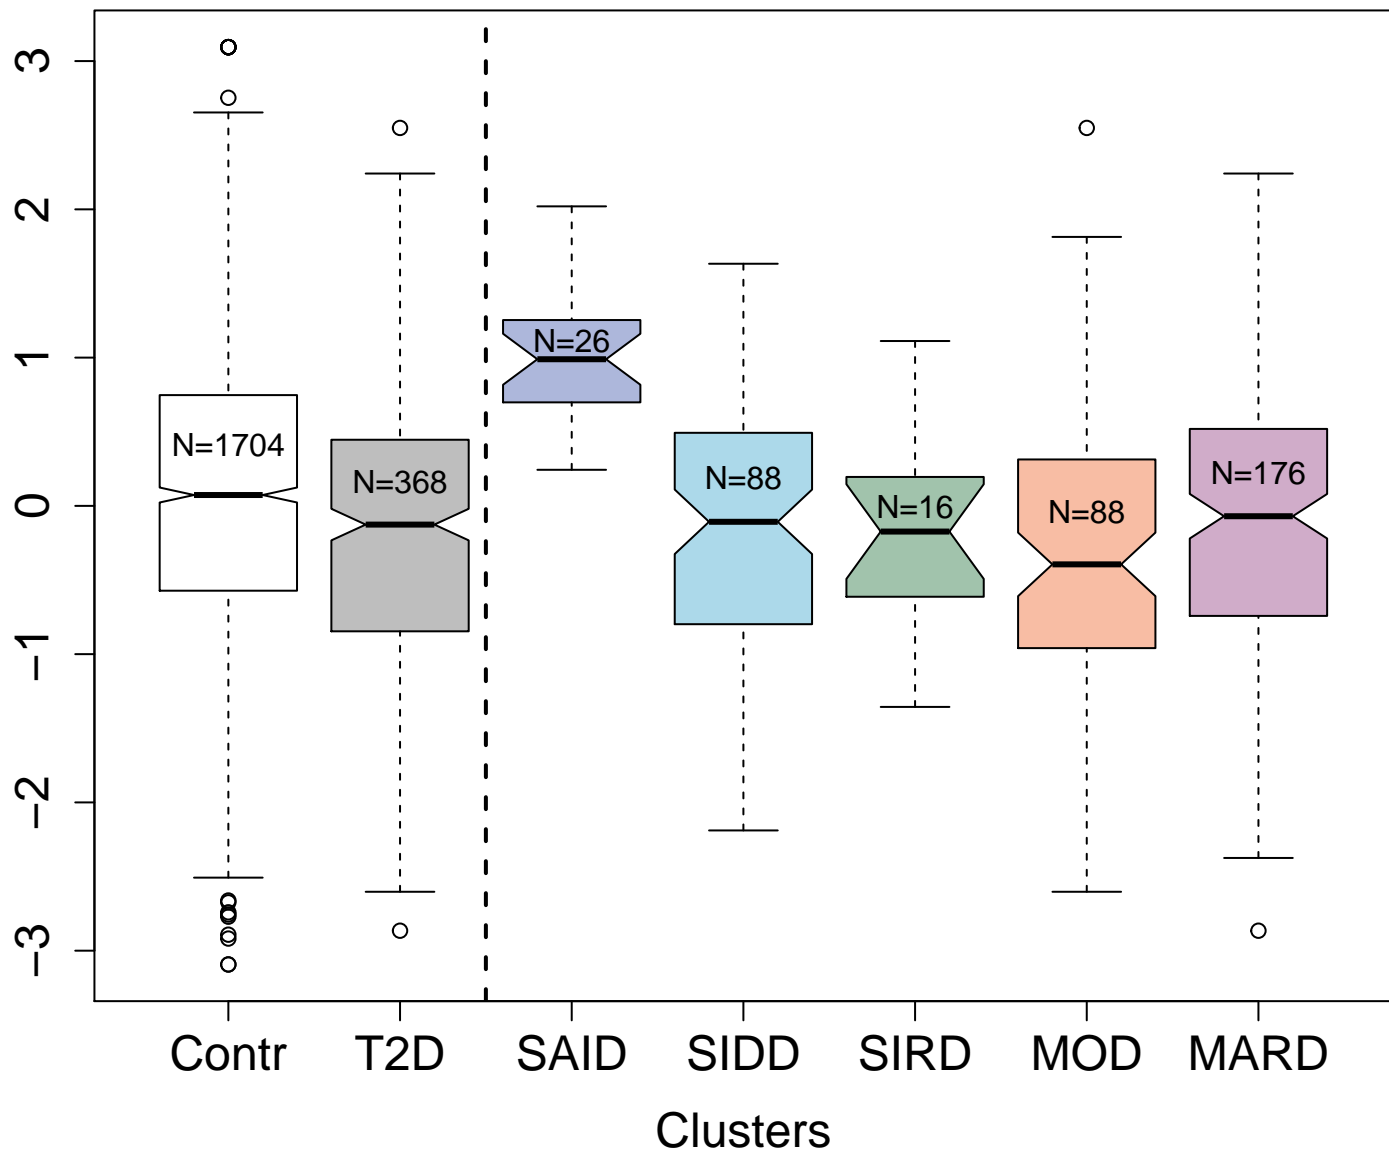

M44675 : docosaheptaenoate (DHA; 22:6n3)

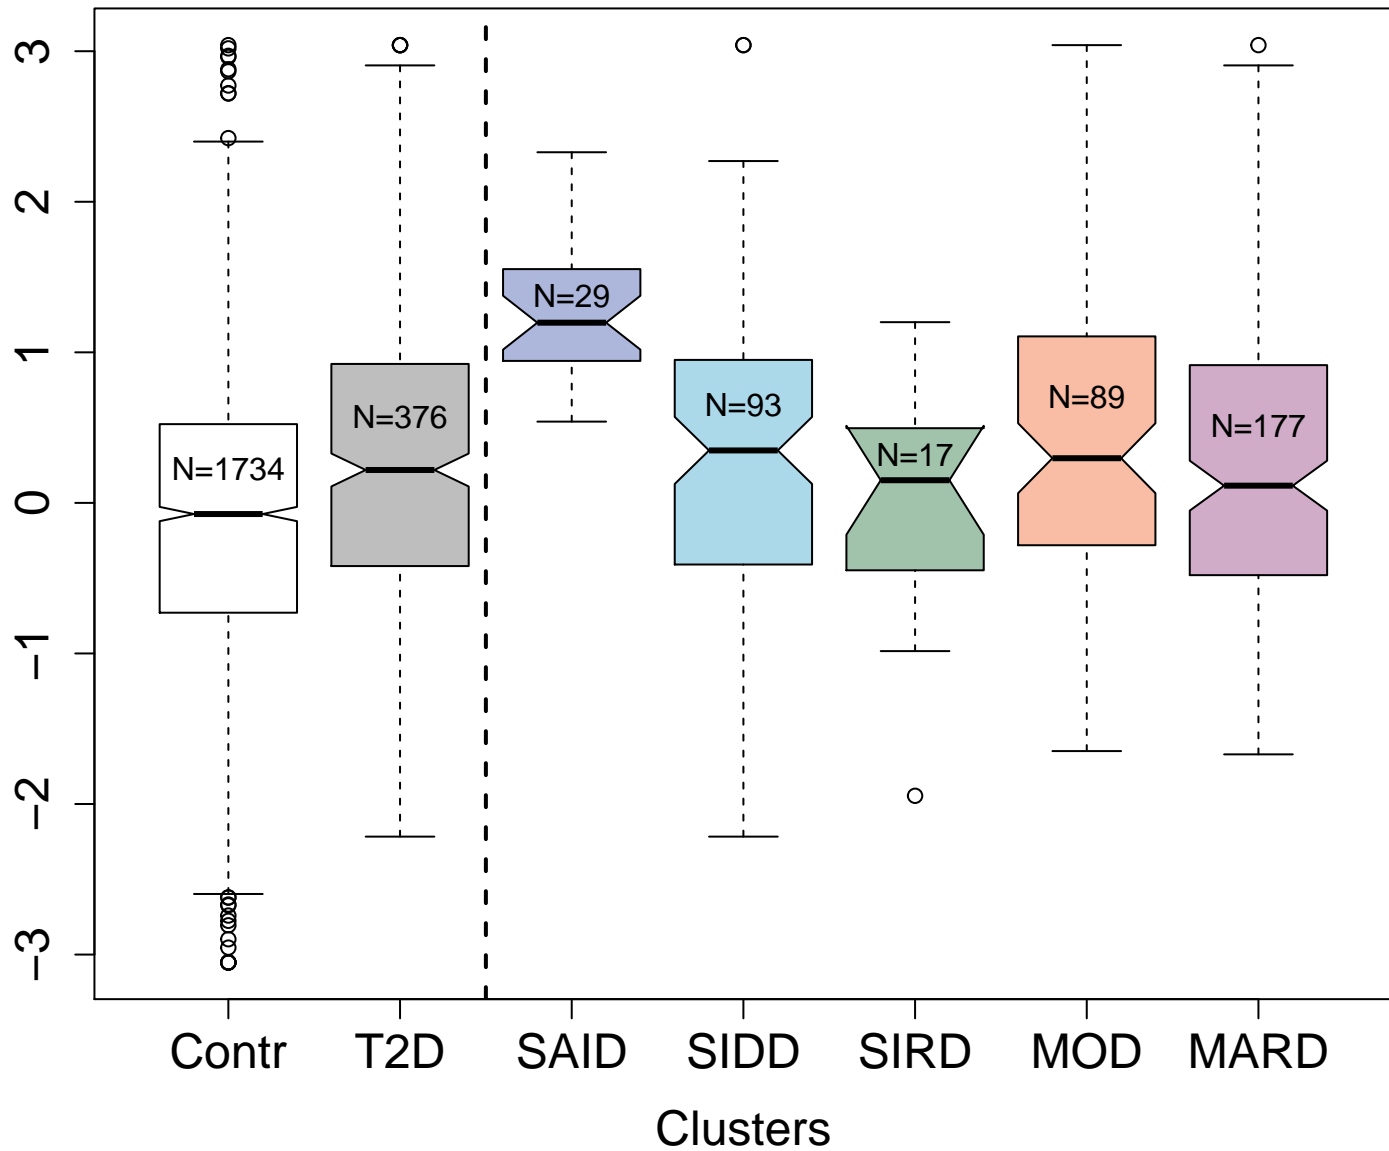

M46409 : X - 21364

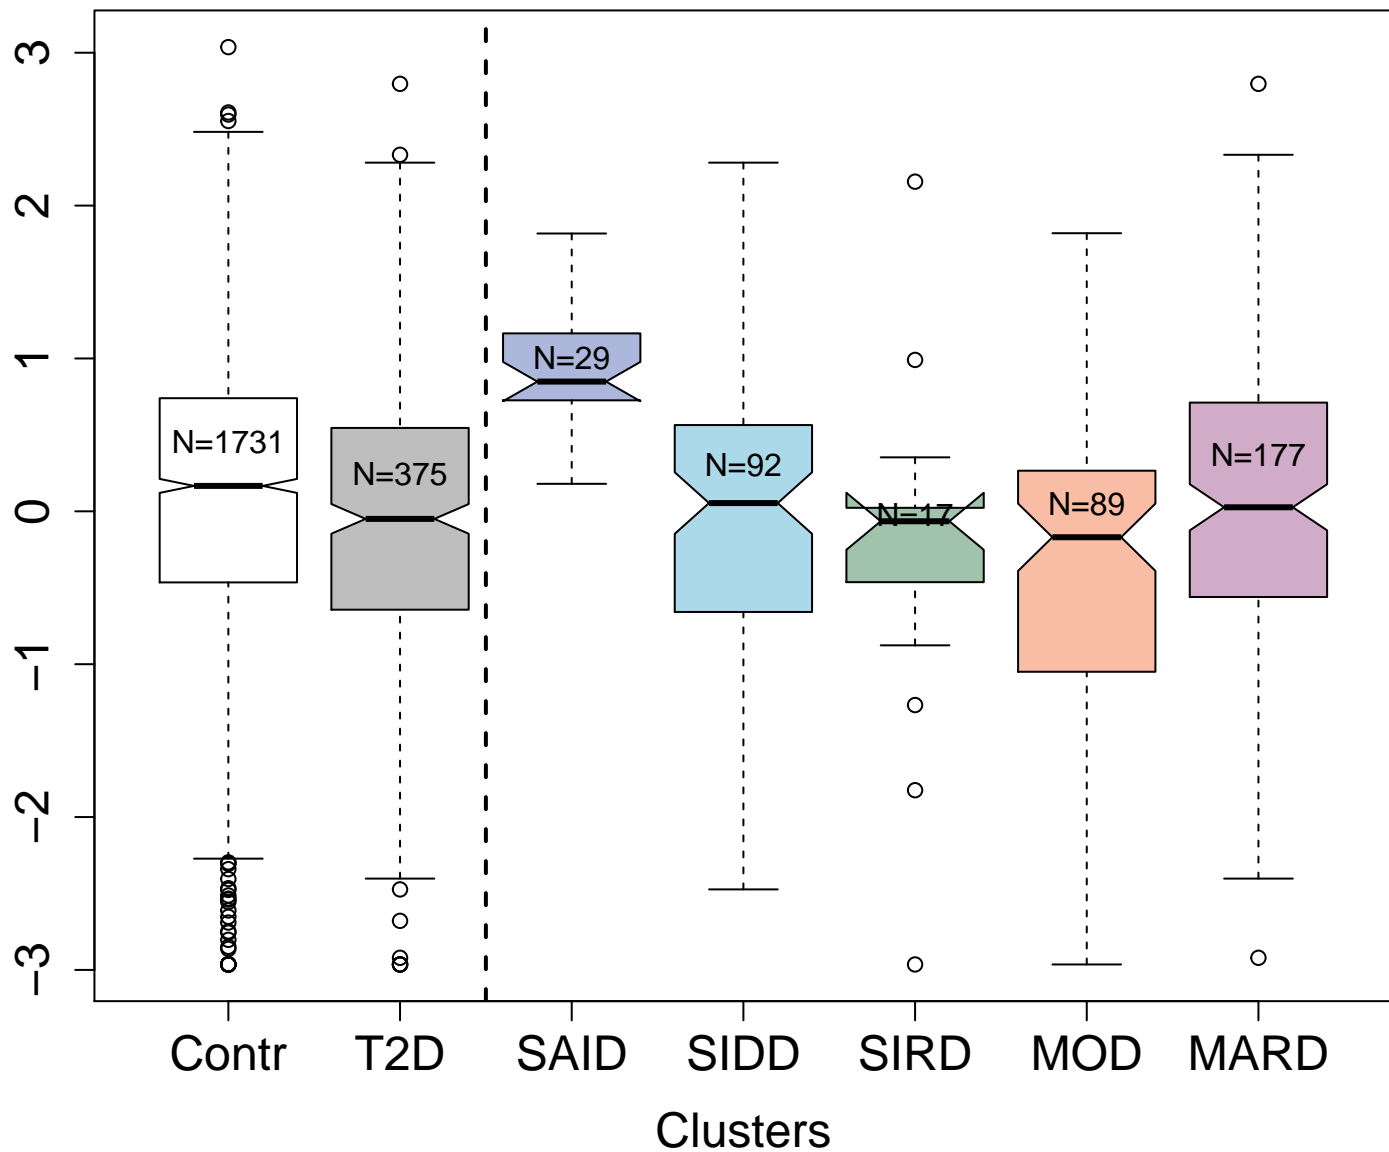

M46966 : X - 12126

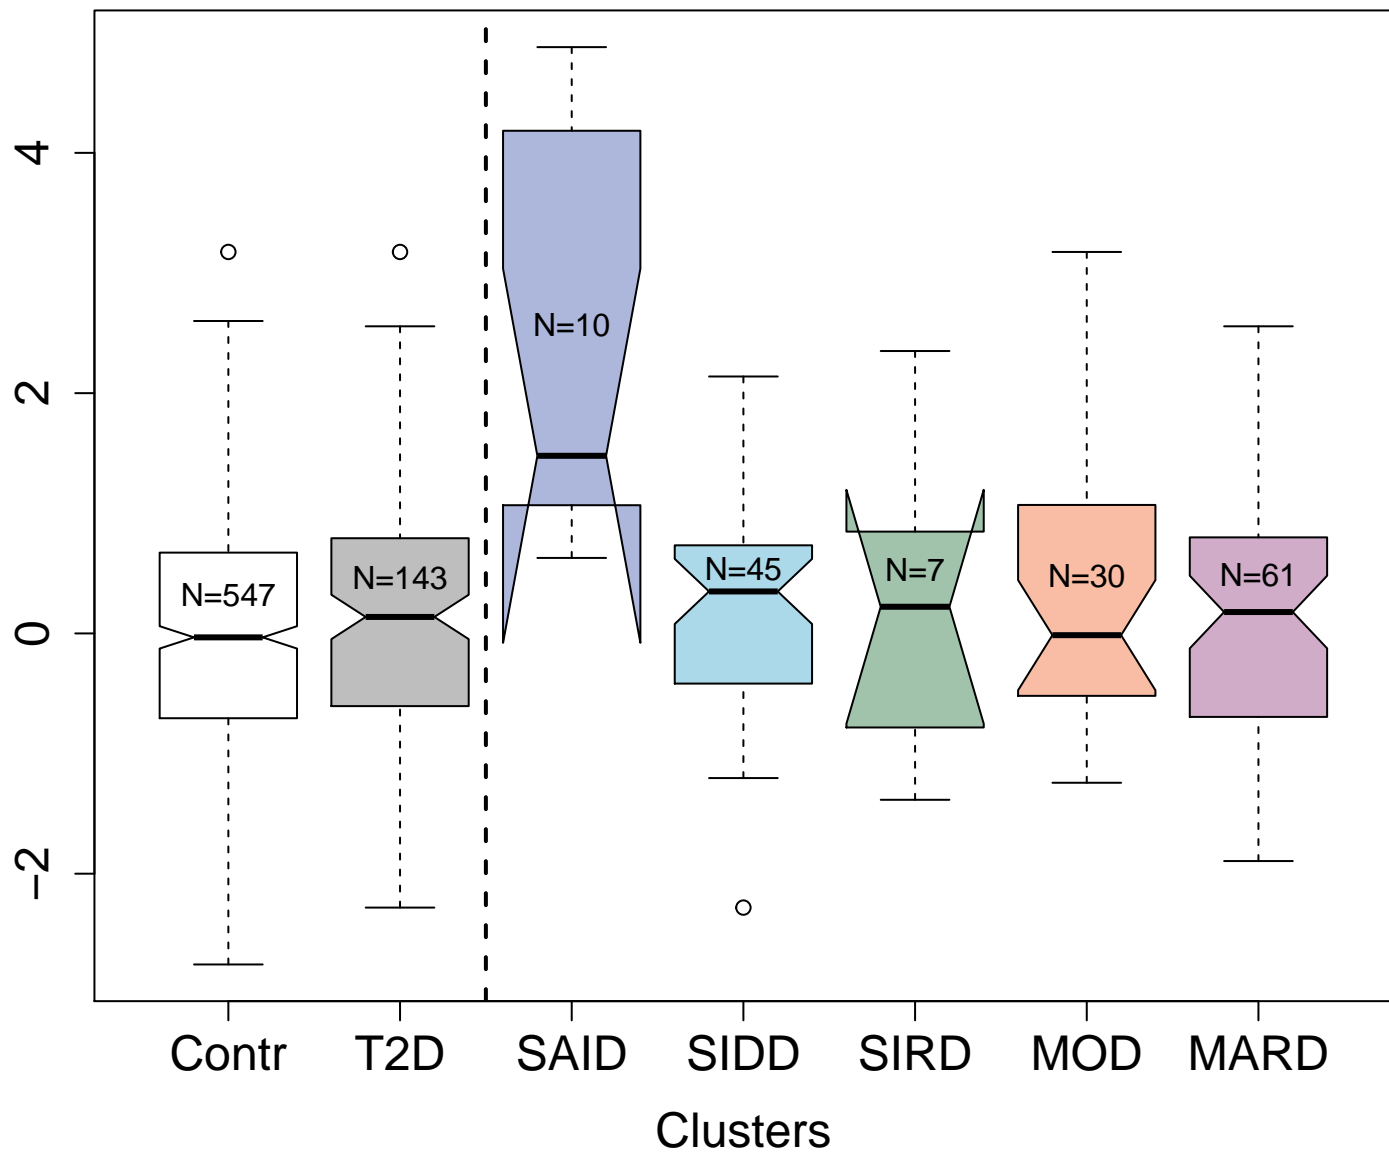

M52502 : X - 24307

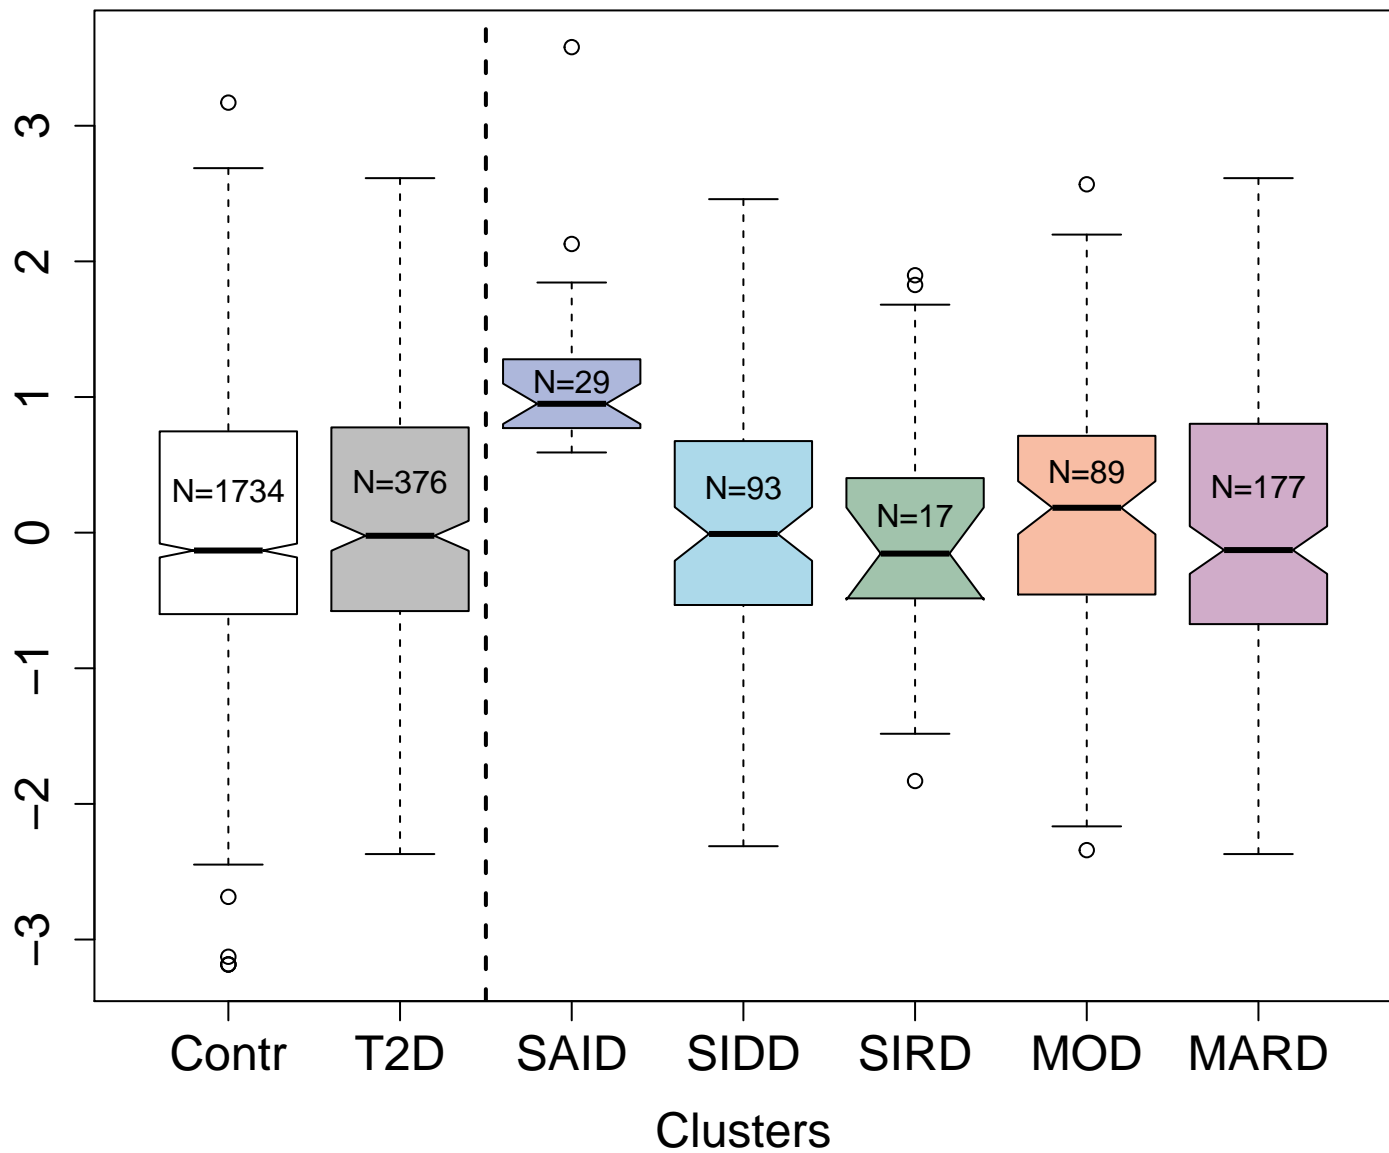



M48679 : N-acetylhistamine

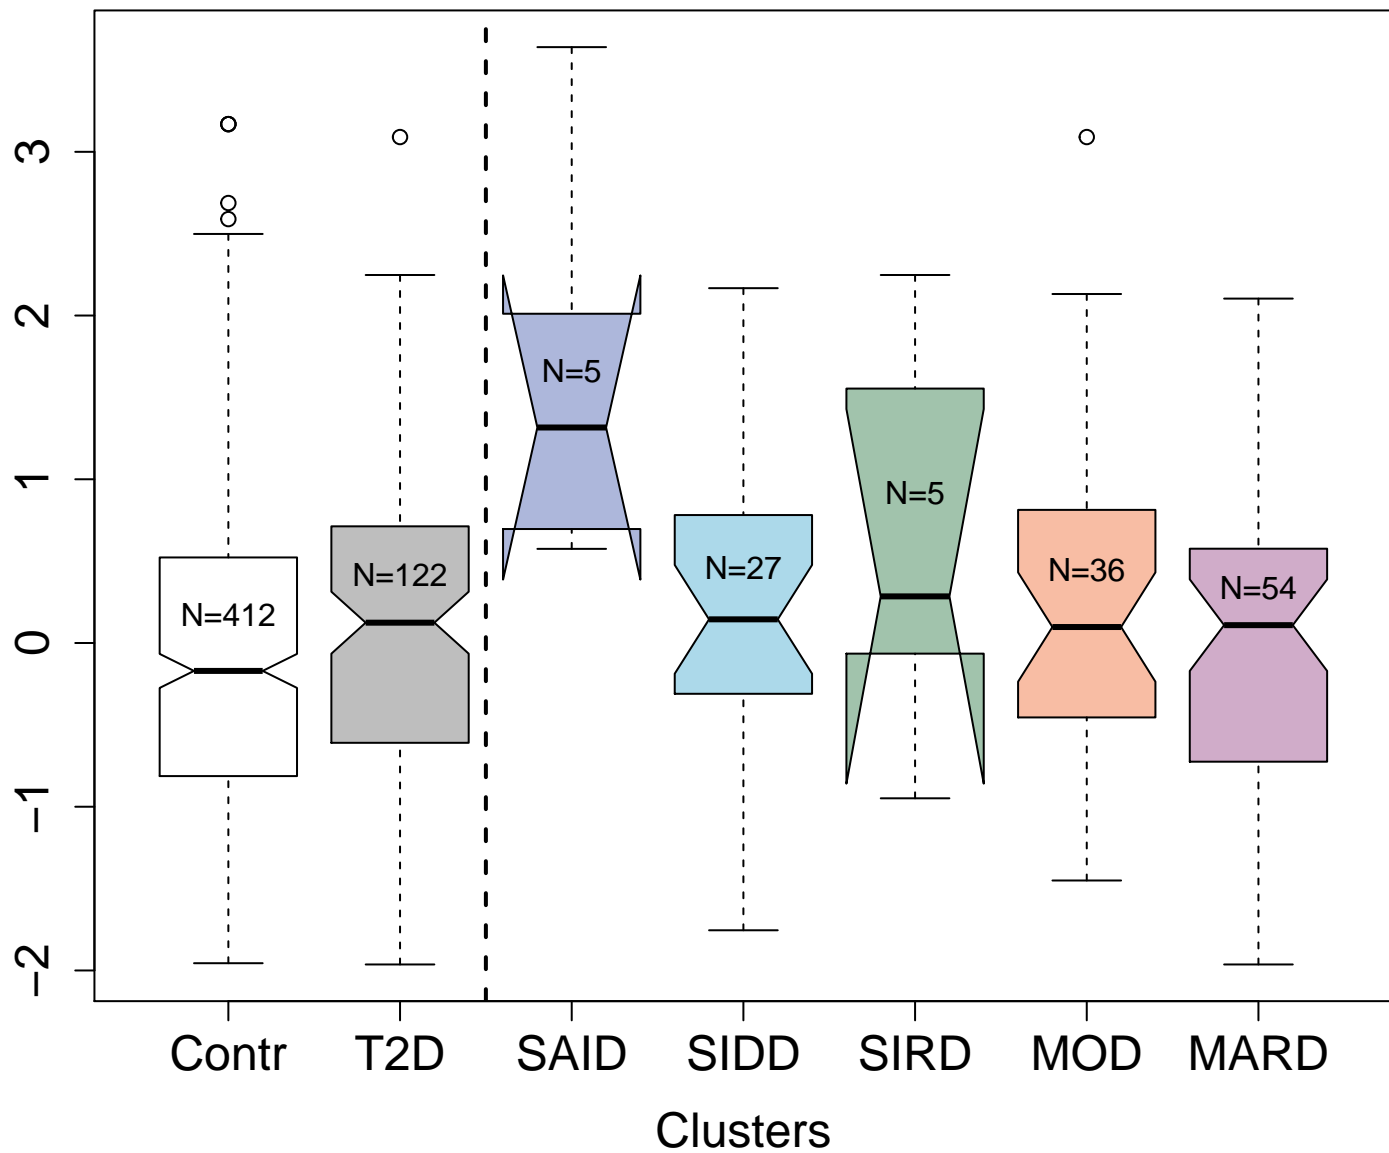

M48566 : valsartan

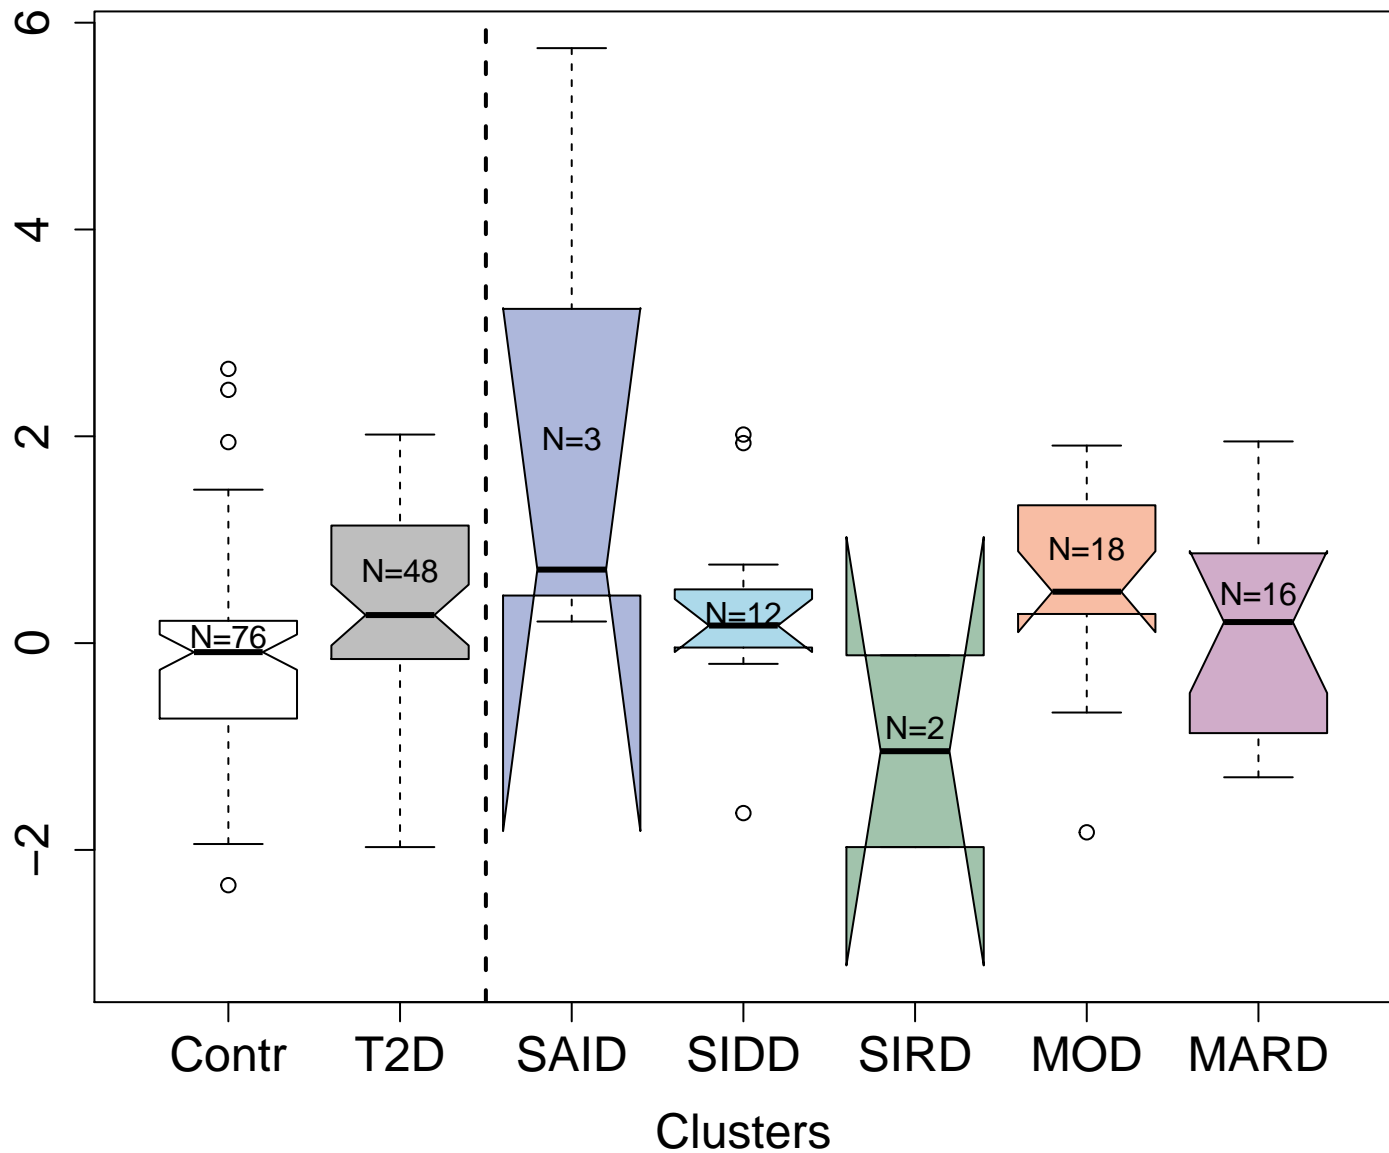

M34395 : 1-methylurate

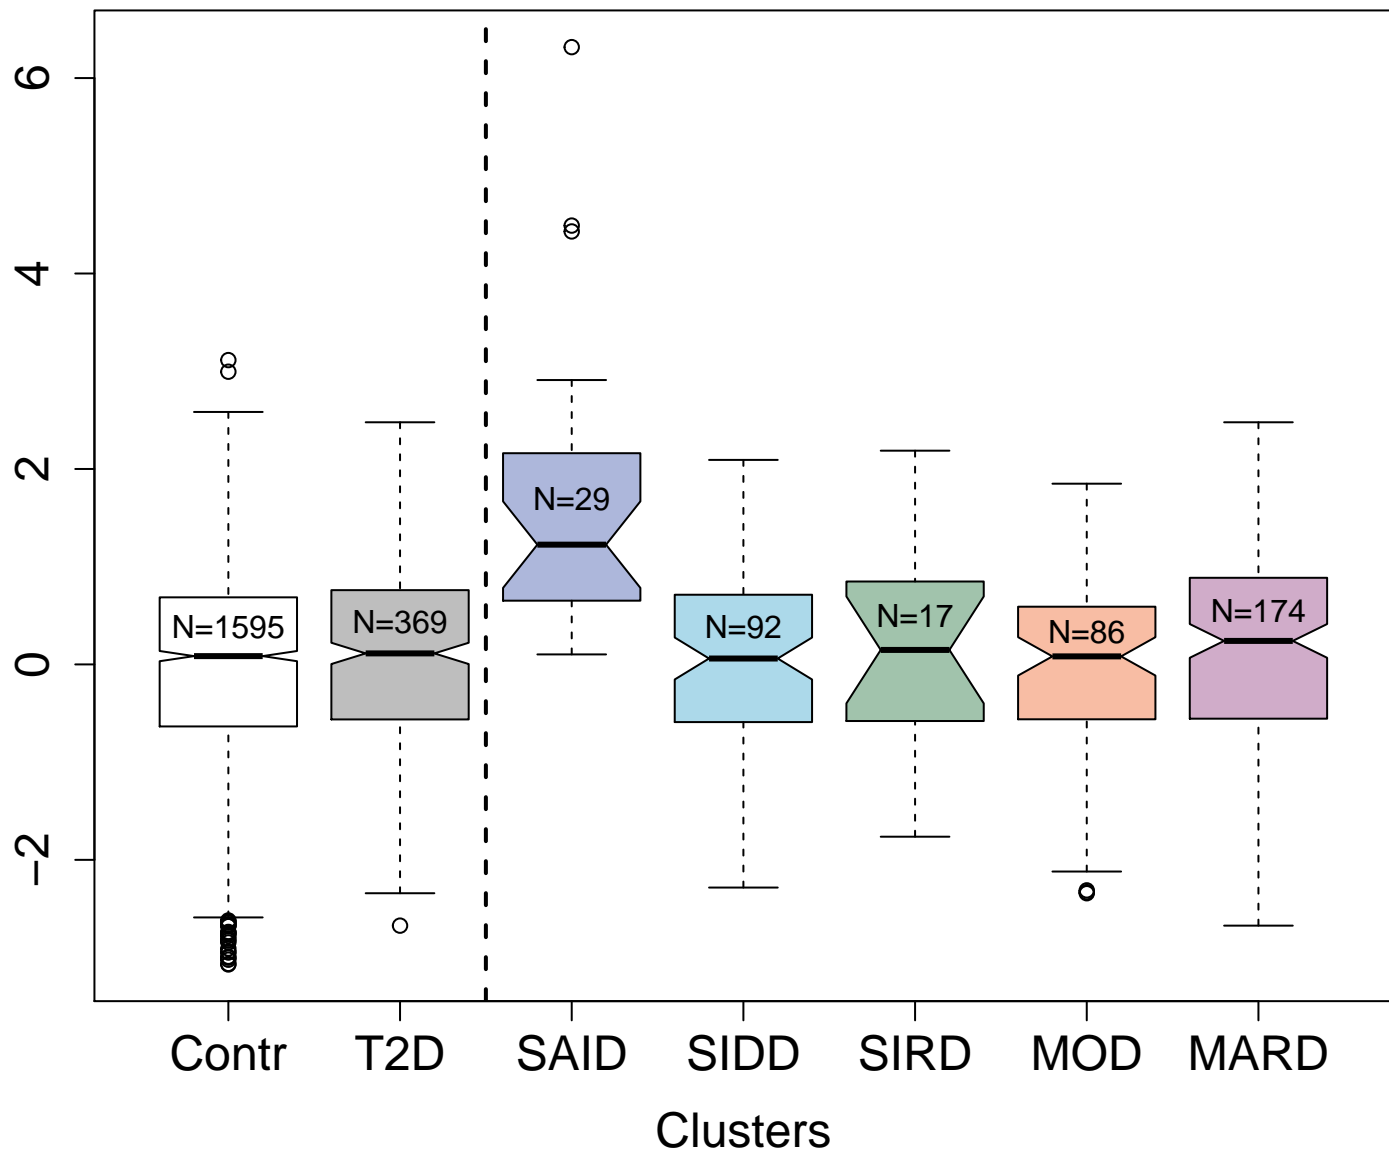

M18392 : theobromine

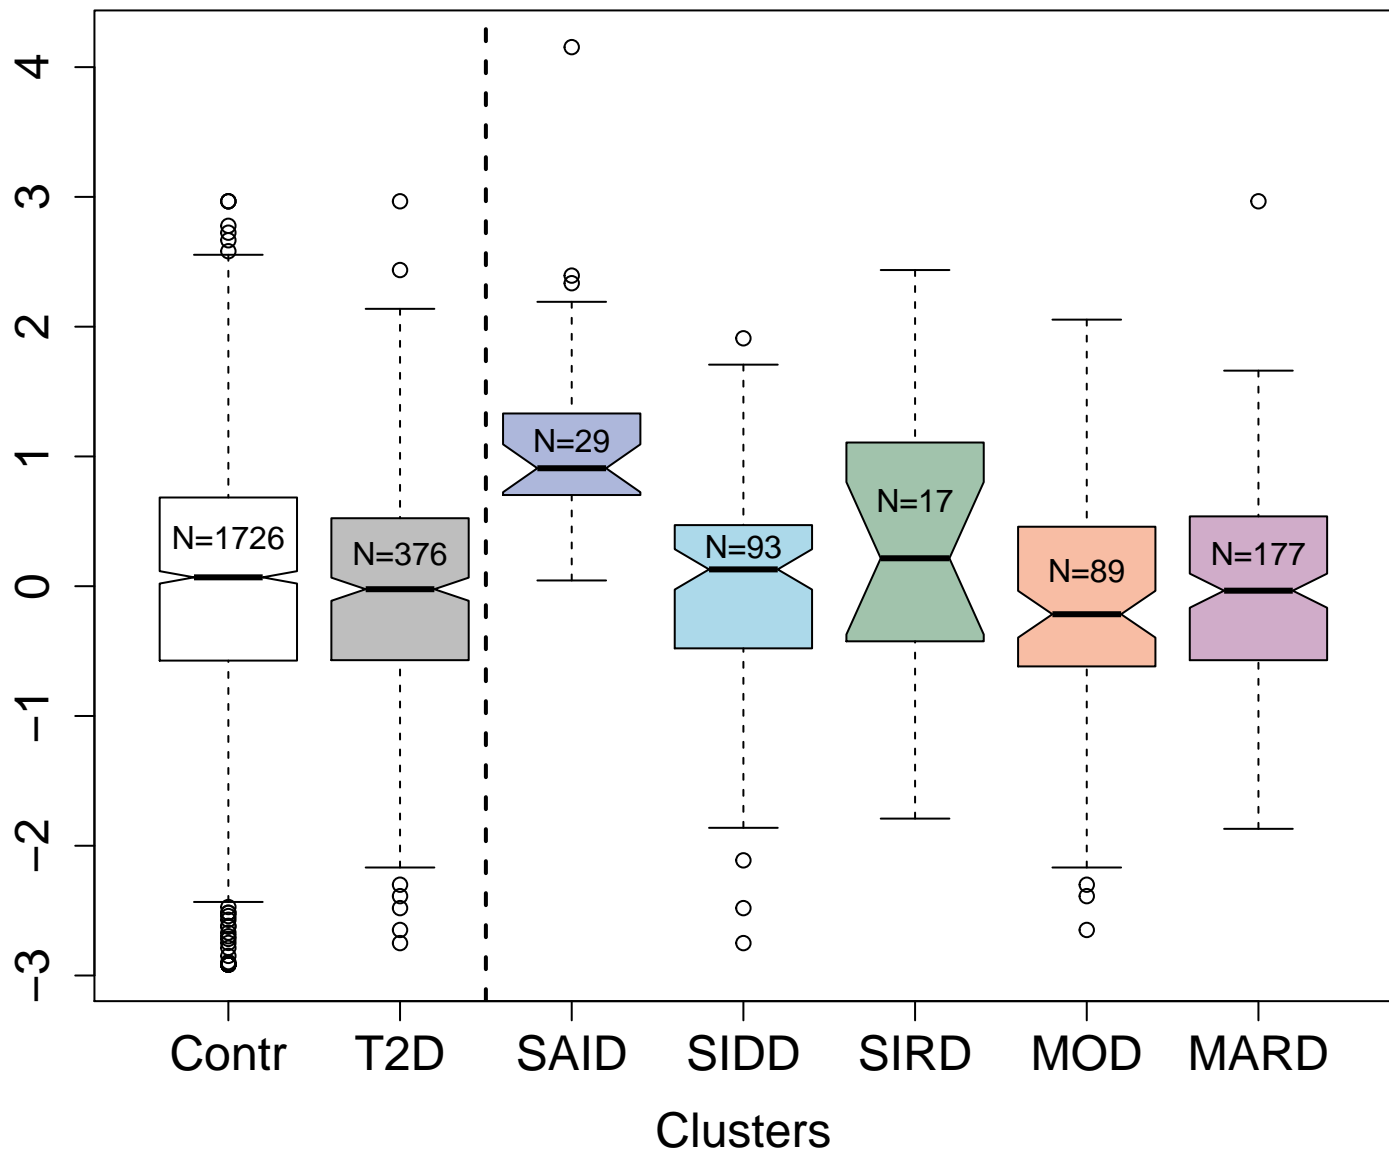

M52677 : 1-(1-enyl-palmitoyl)-2-linoleoyl-GPE (P-16:0/18:2

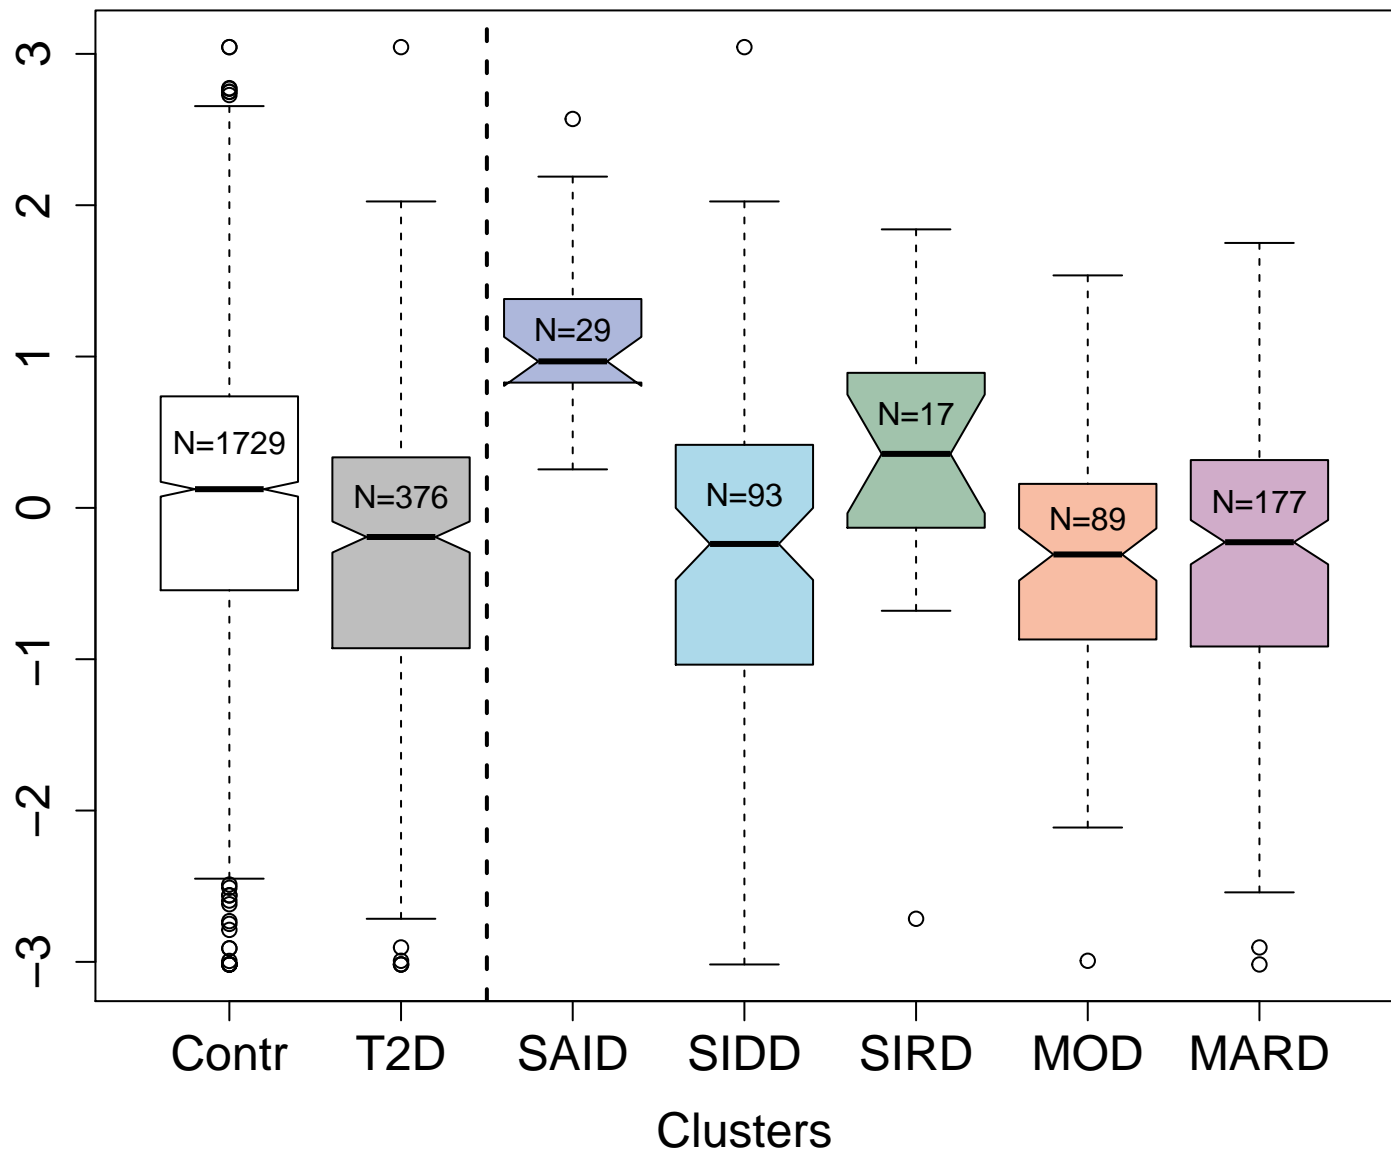

M31555 : pyridoxate

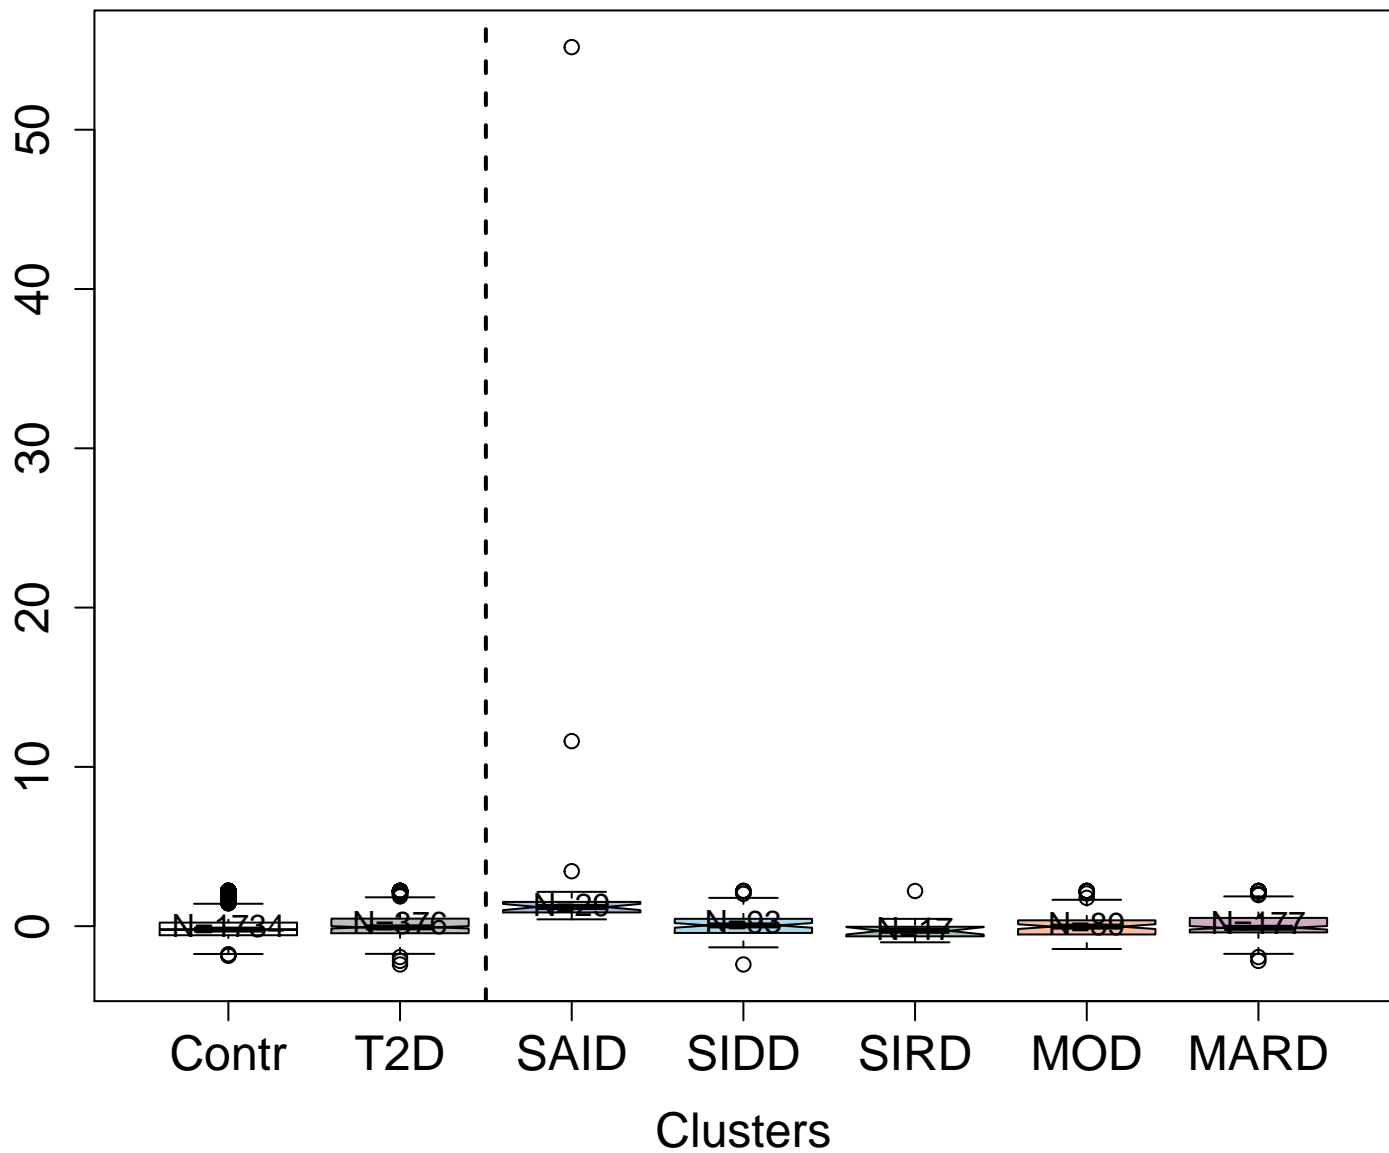

M37432 : N-acetyl-beta-alanine

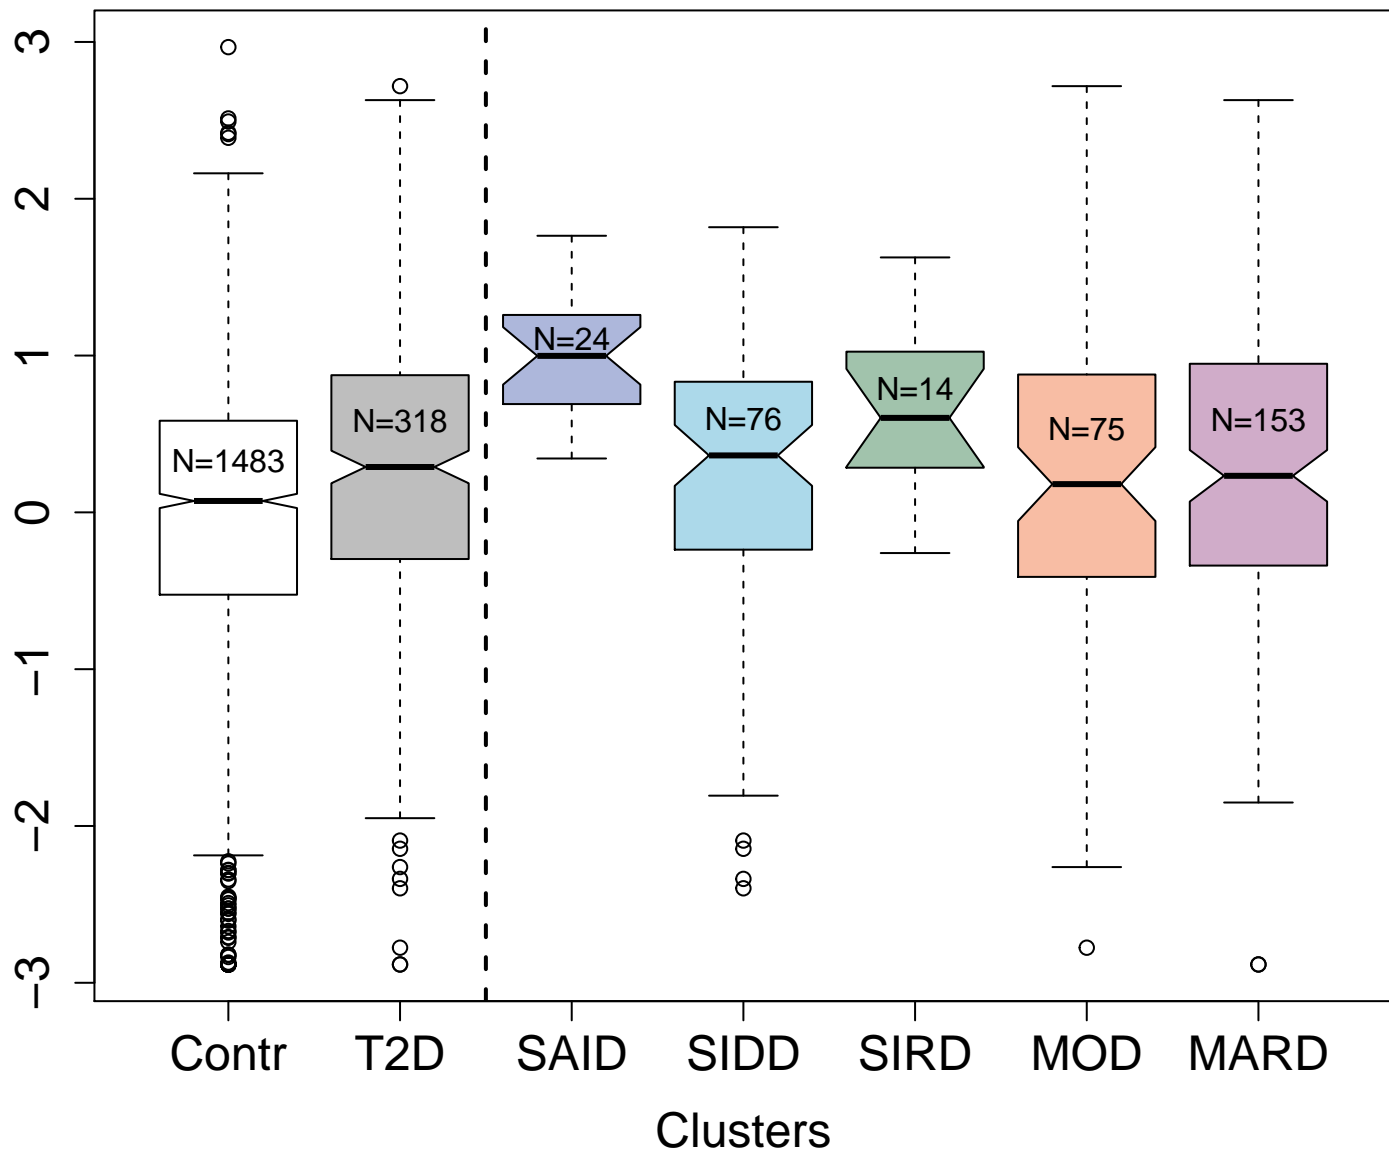

M31912 : glycolithocholate

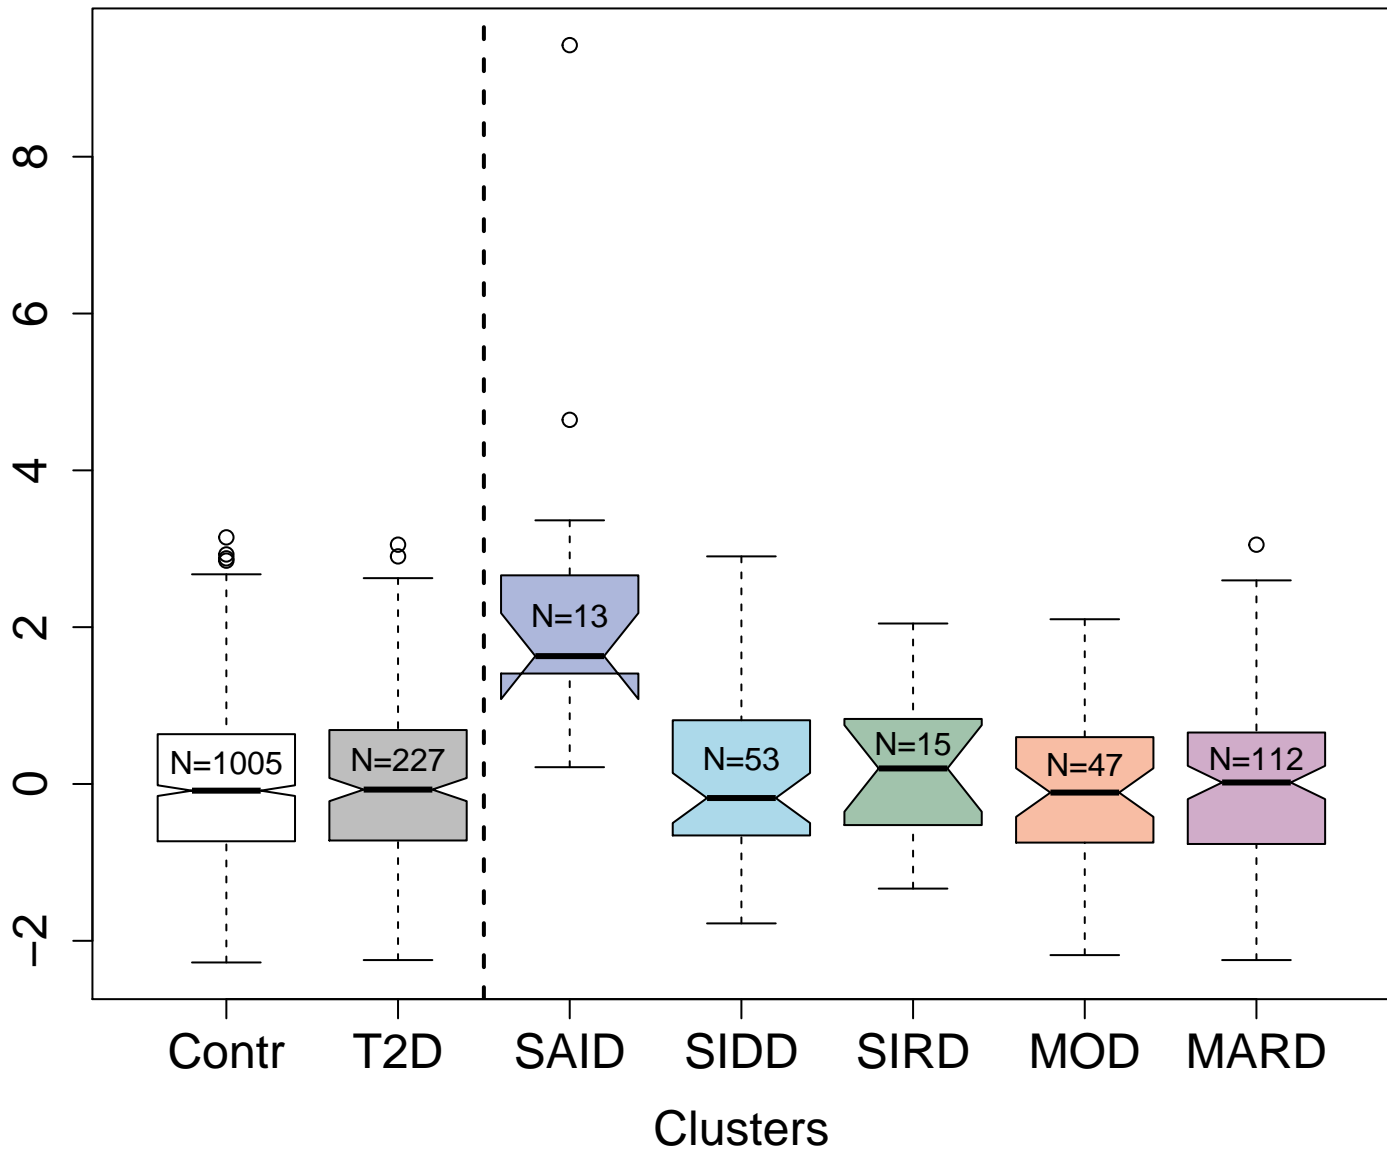



M52468 : 1-stearoyl-2-linoleoyl-GPI (18:0/18:2)

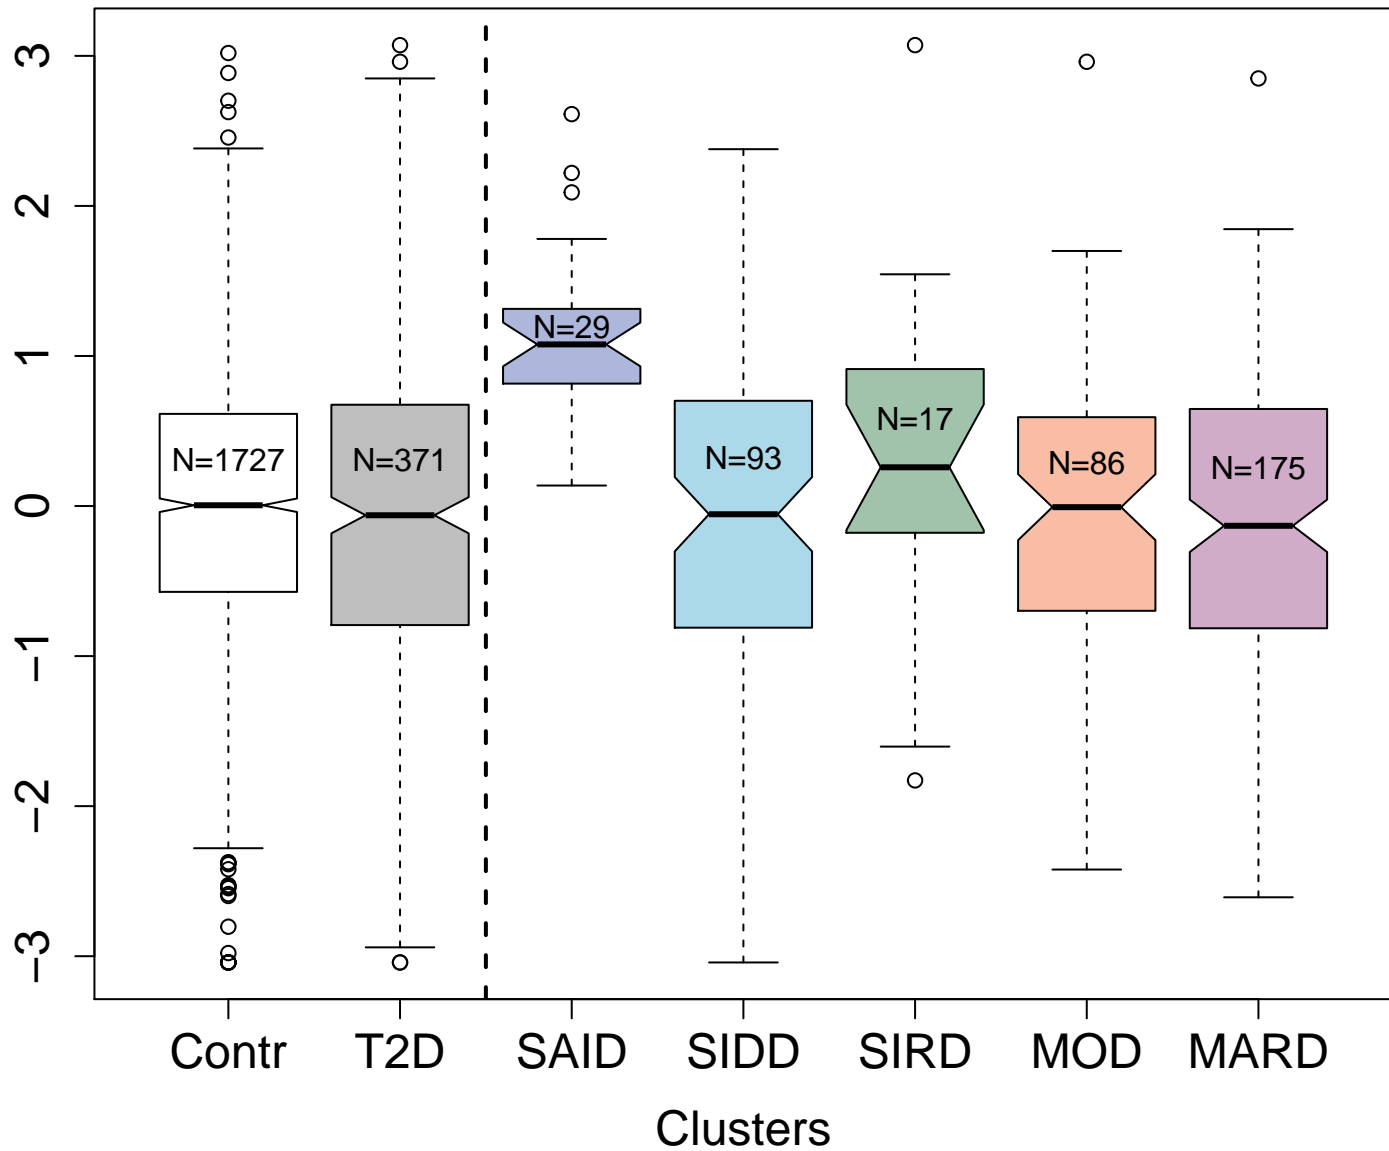

M62711 : N-acetyltheanine

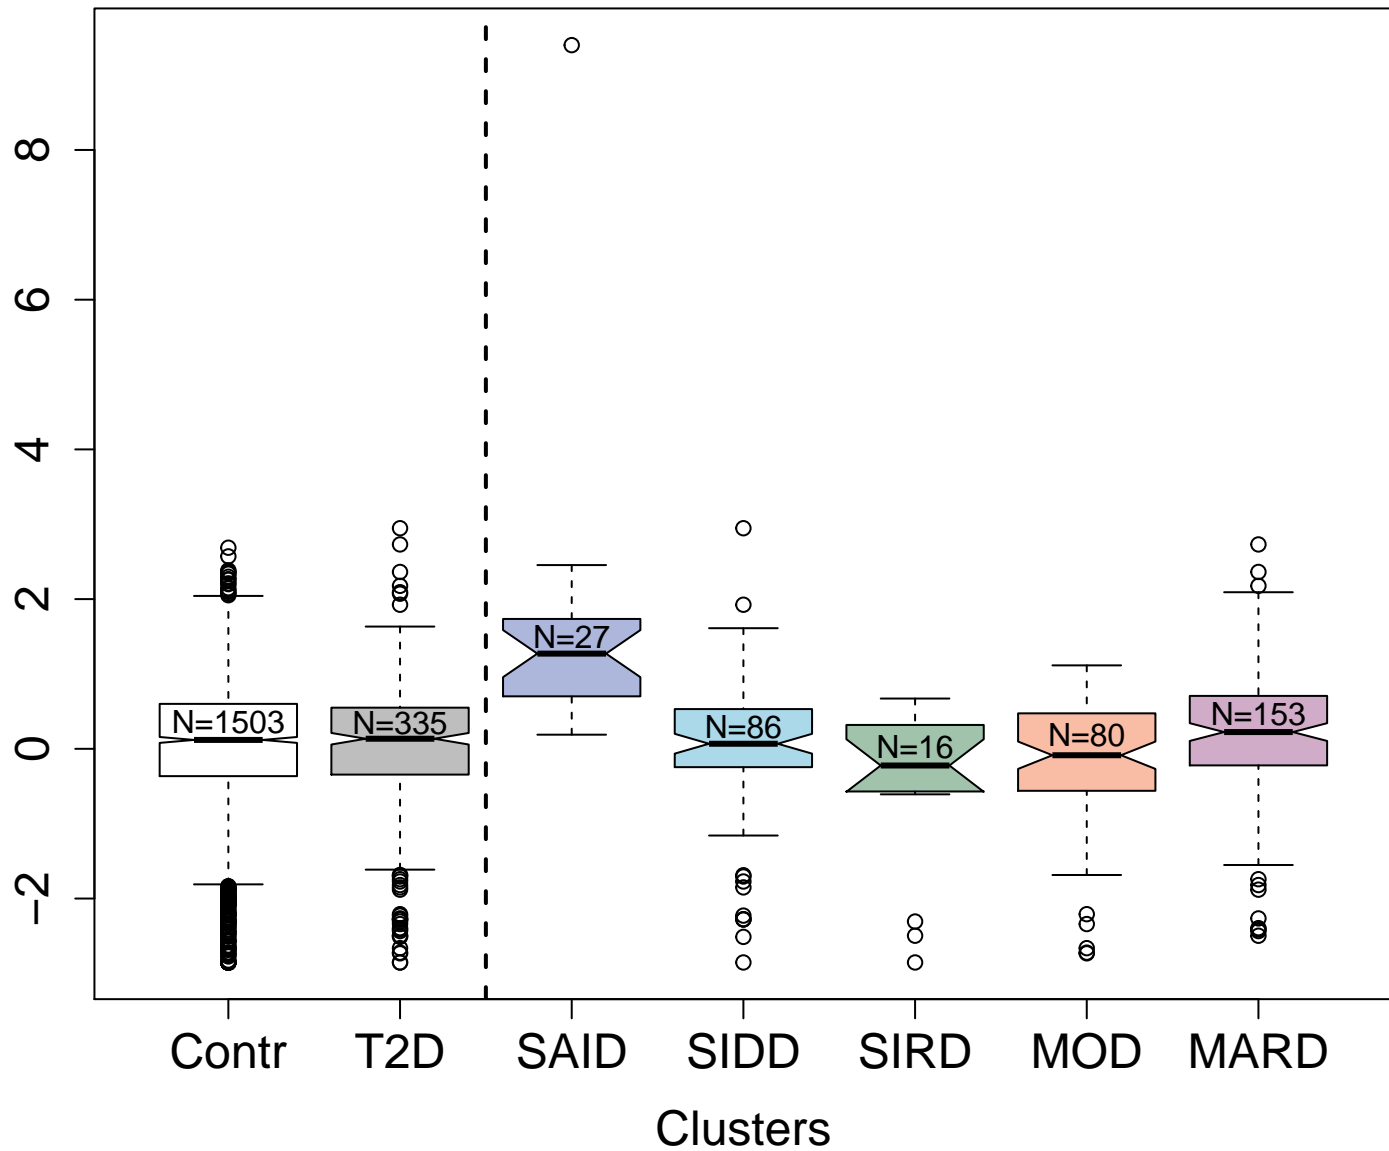

M54968 : linoleyl-linoleyl-glycerol (18:2/18:2) [1]\*

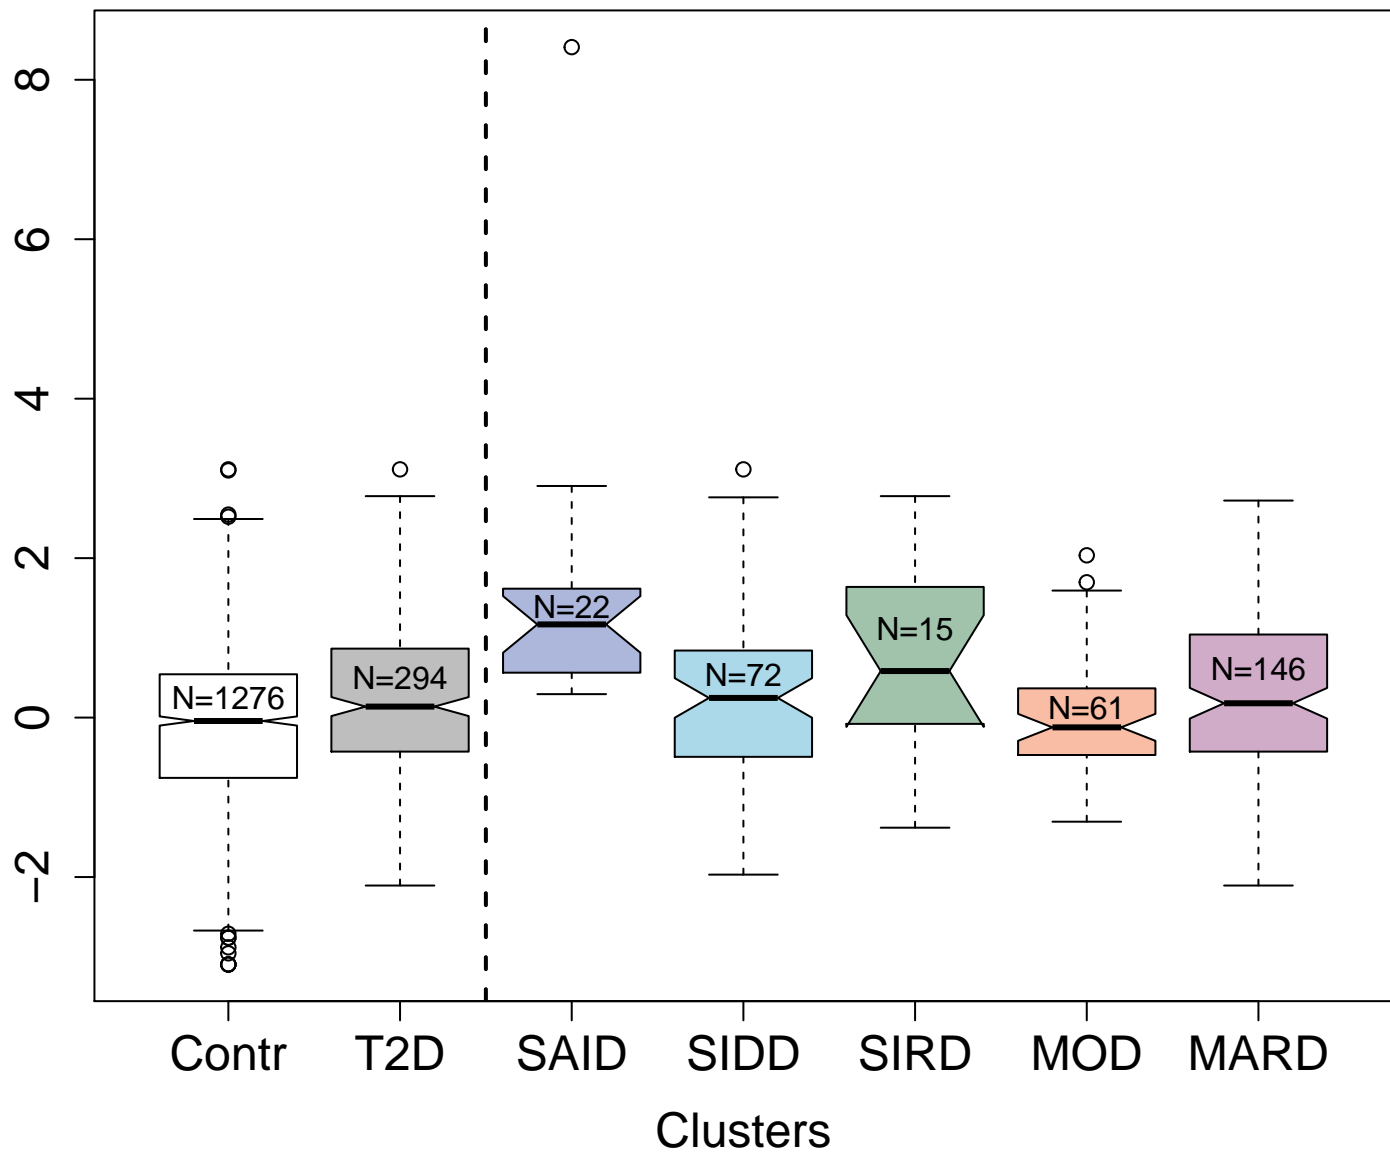

M49536 : X - 23659

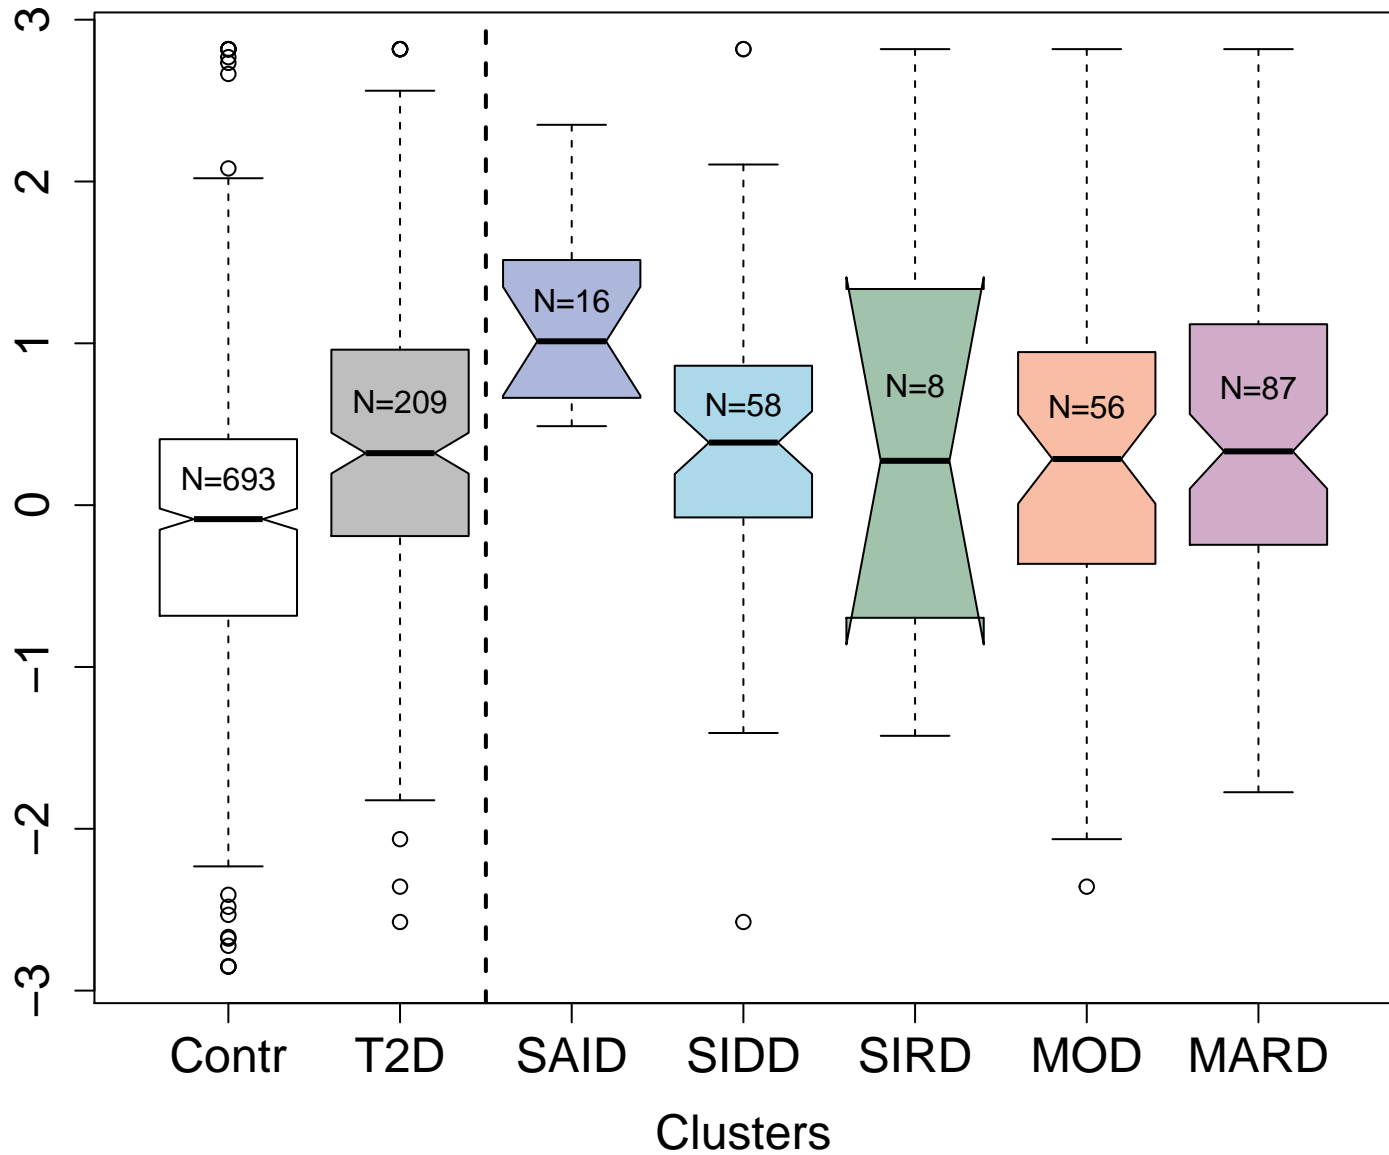

M38754 : gamma-carboxyglutamate

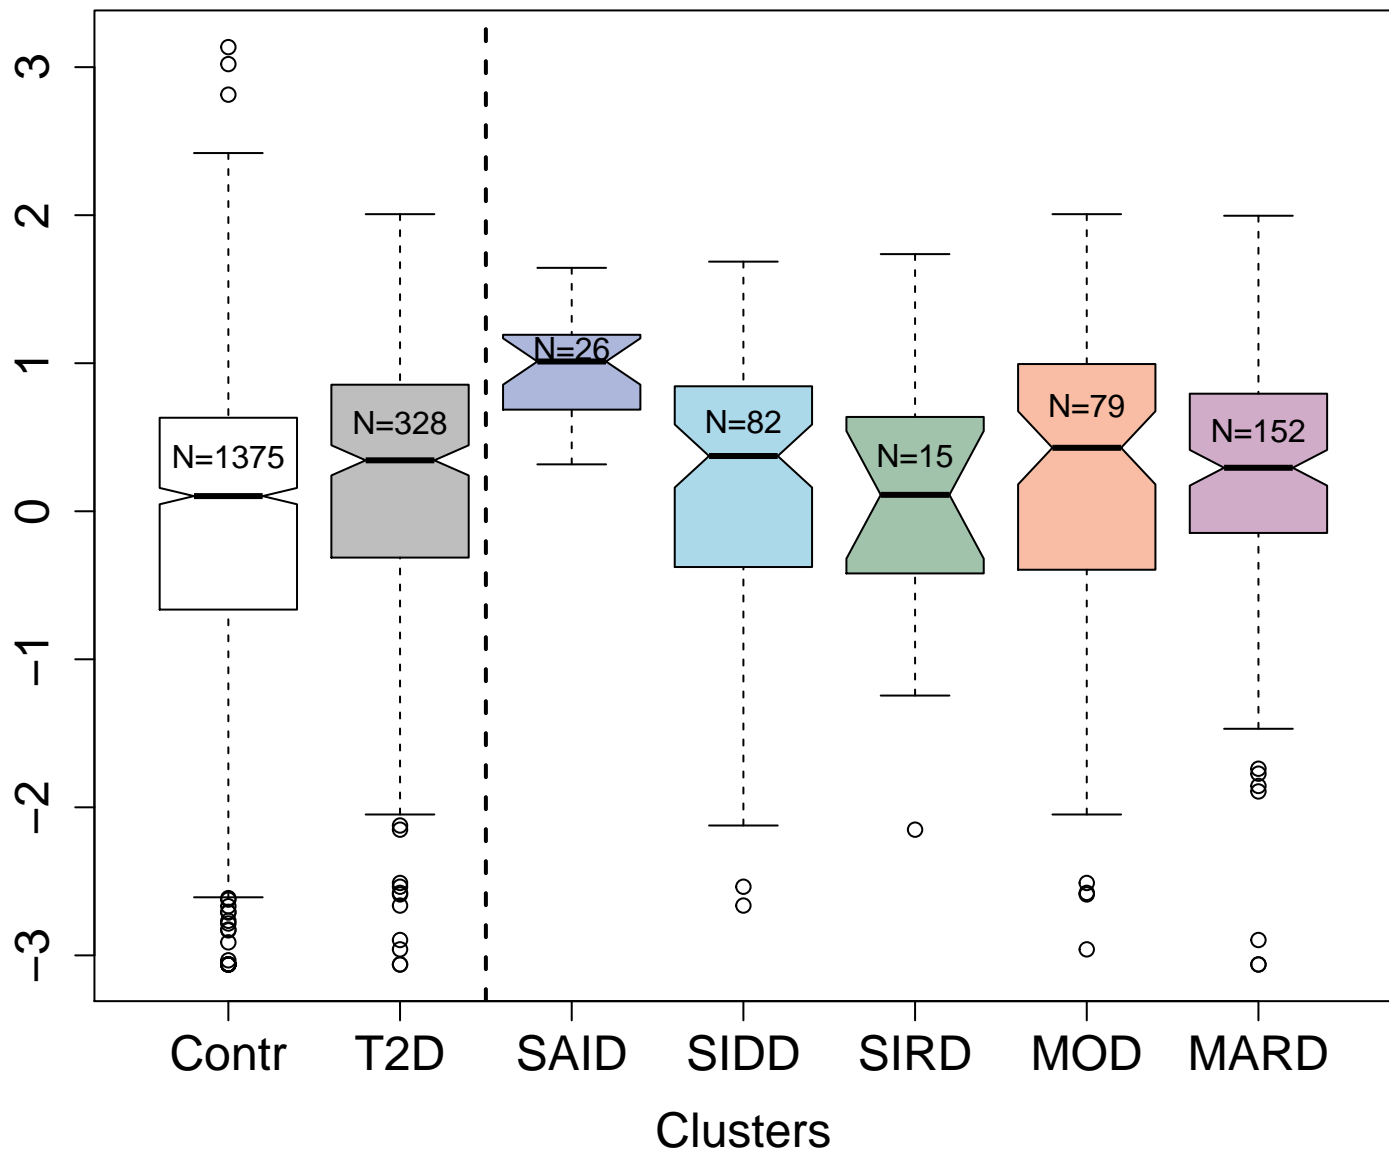

M32377 : N-acetylneuraminatate

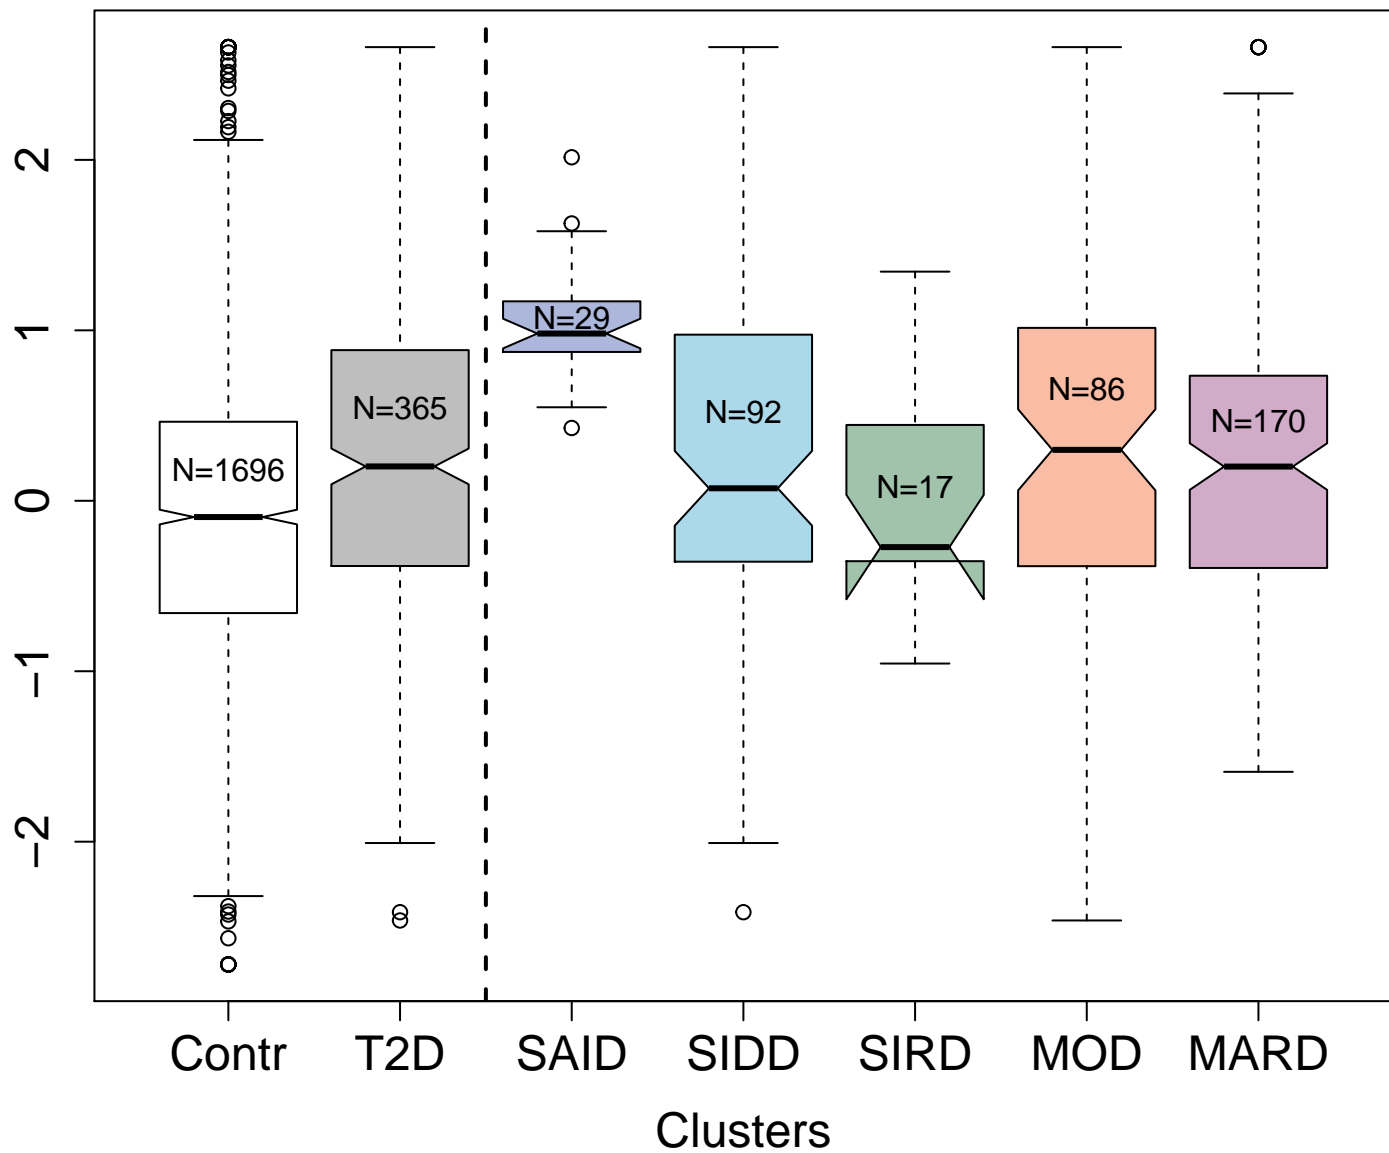

M47203 : X - 13007

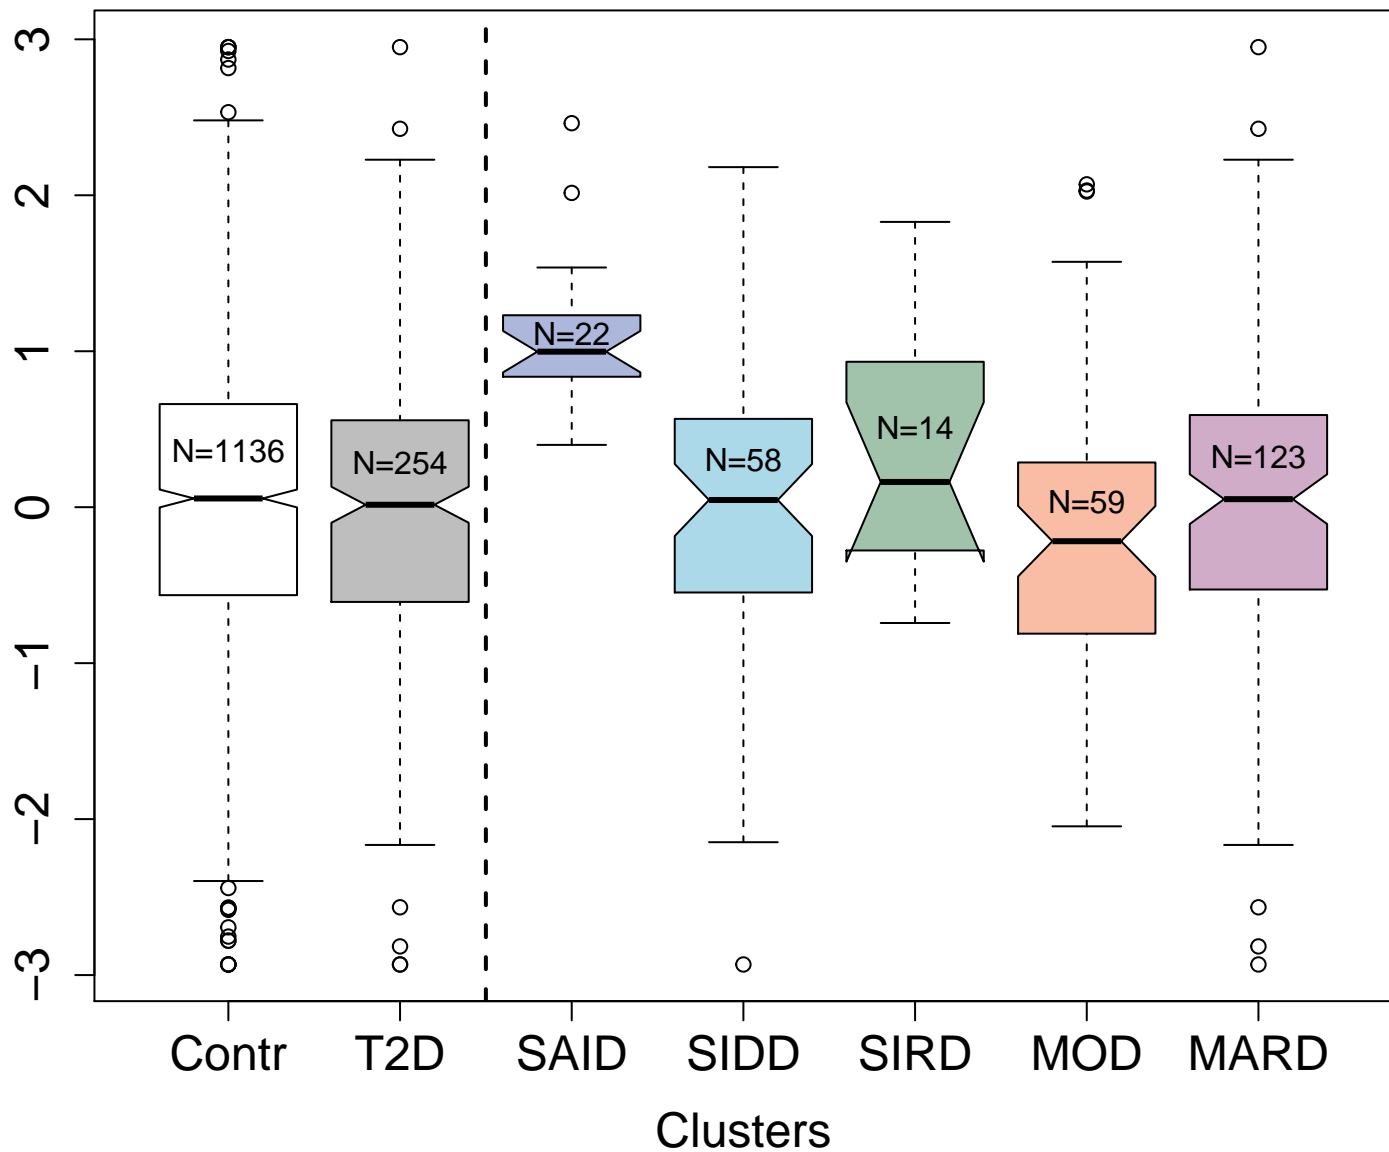

M62287 : delta-CEHC

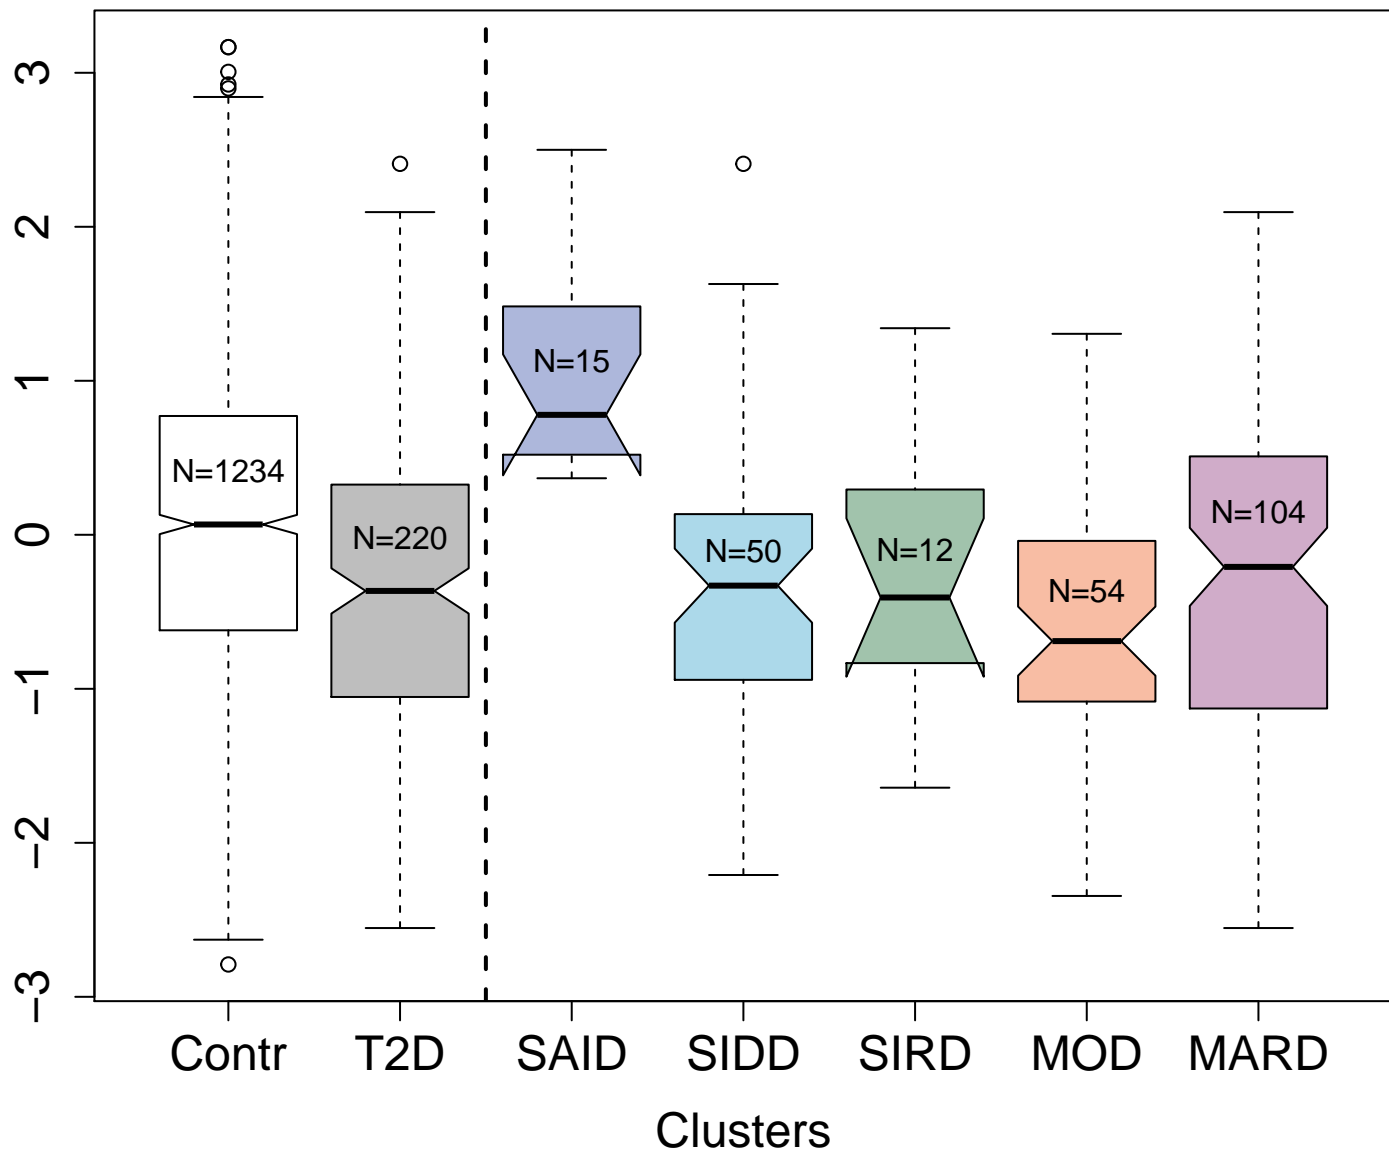



M43507 : 3b-hydroxy-5-cholenoic acid

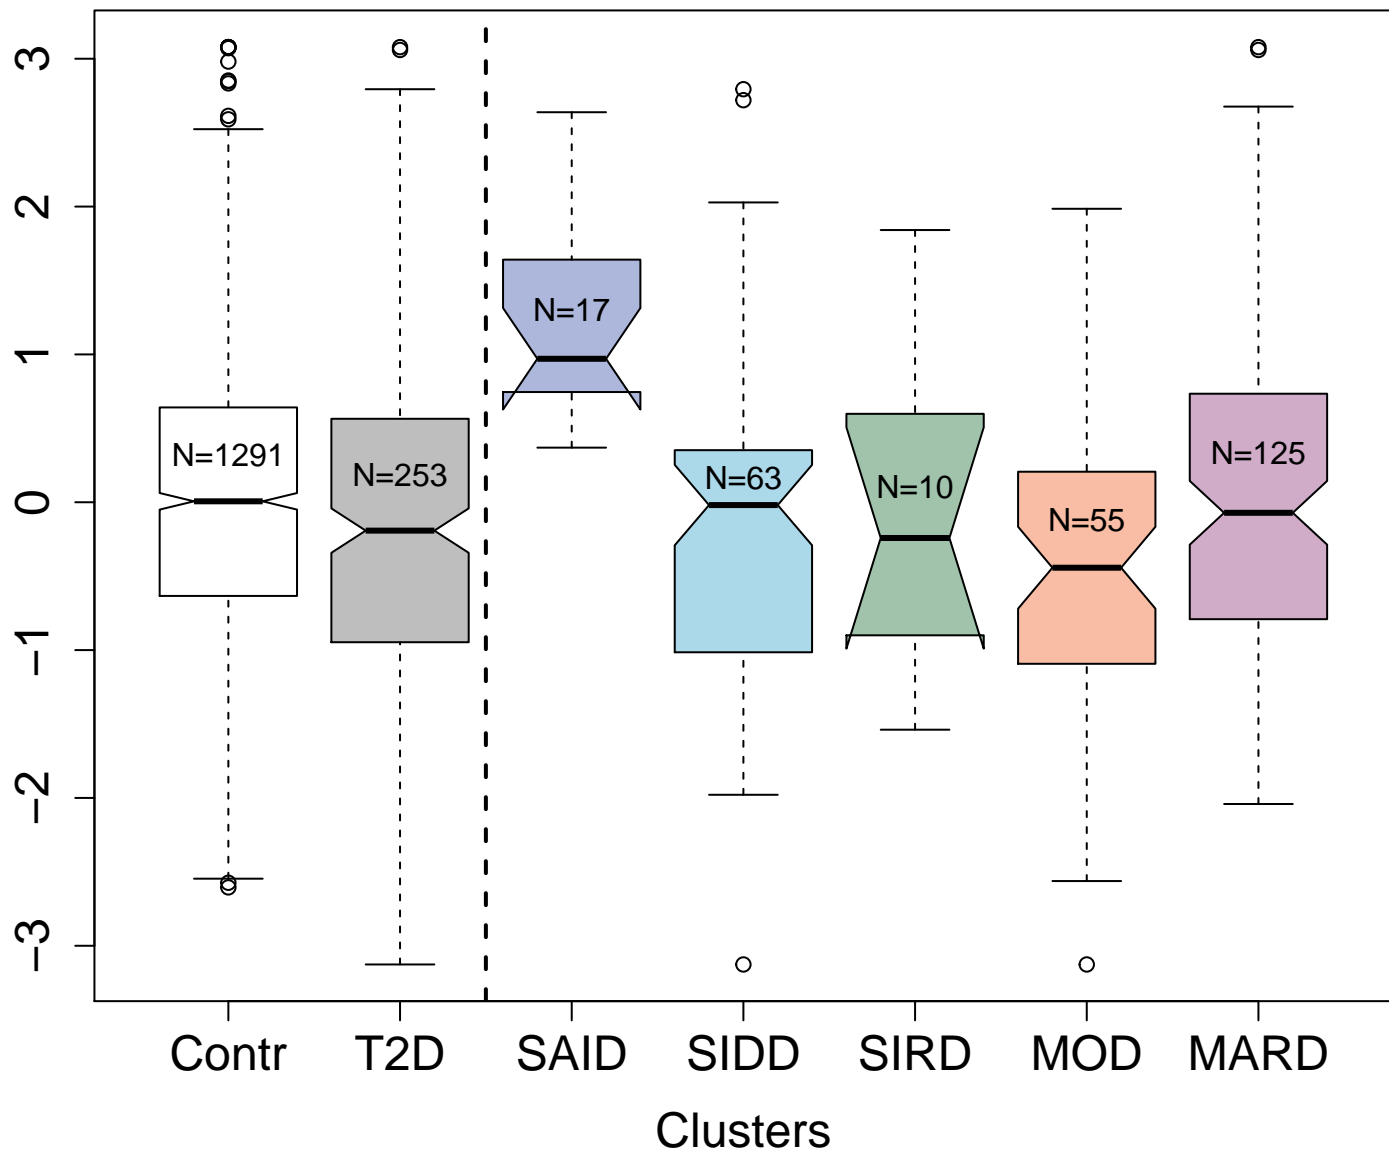

M49883 : X - 23974

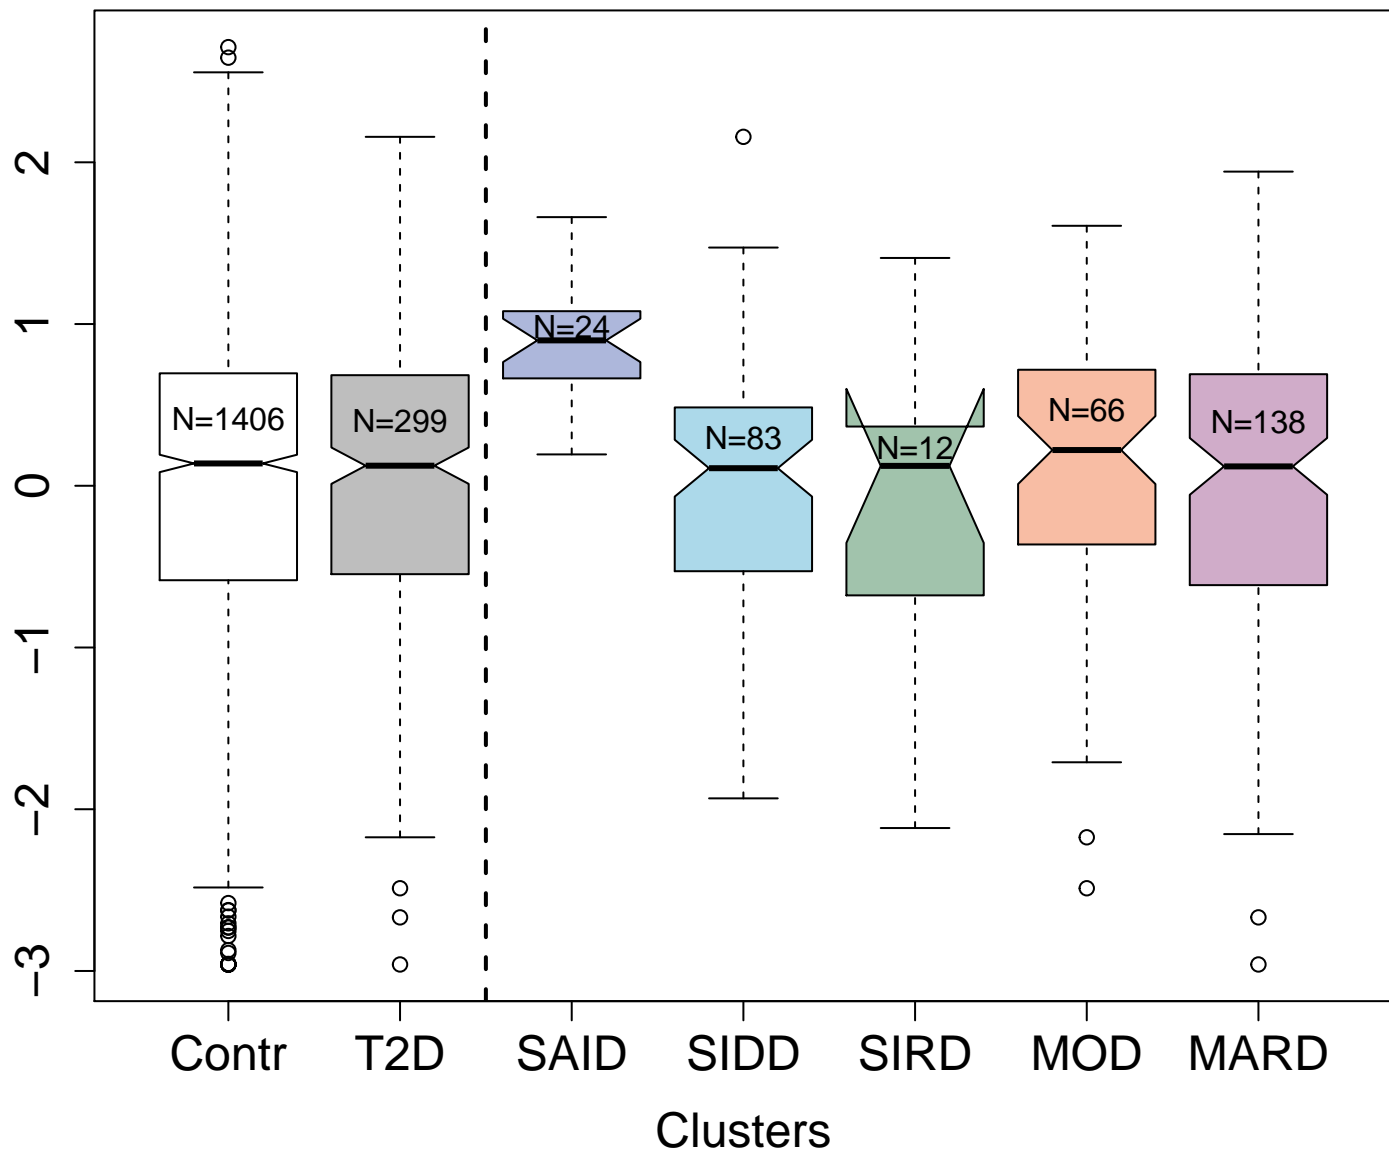

M35305 : 1-palmitoyl-GPI (16:0)

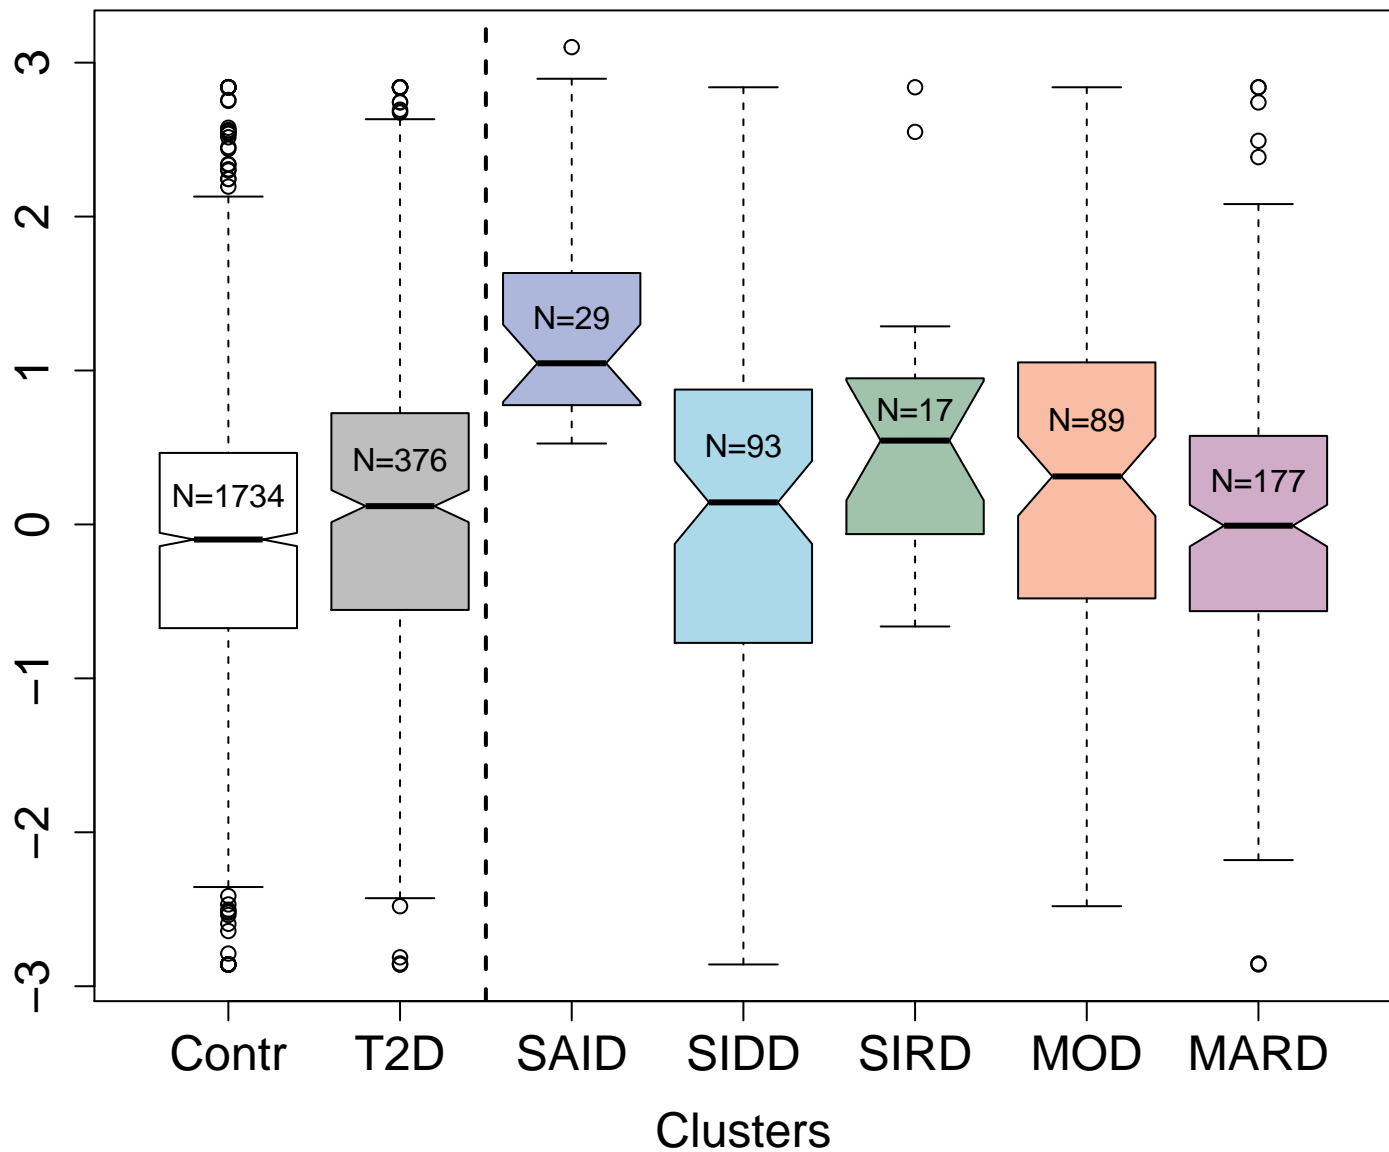

M18281 : 2-hydroxyhippurate (salicylurate)

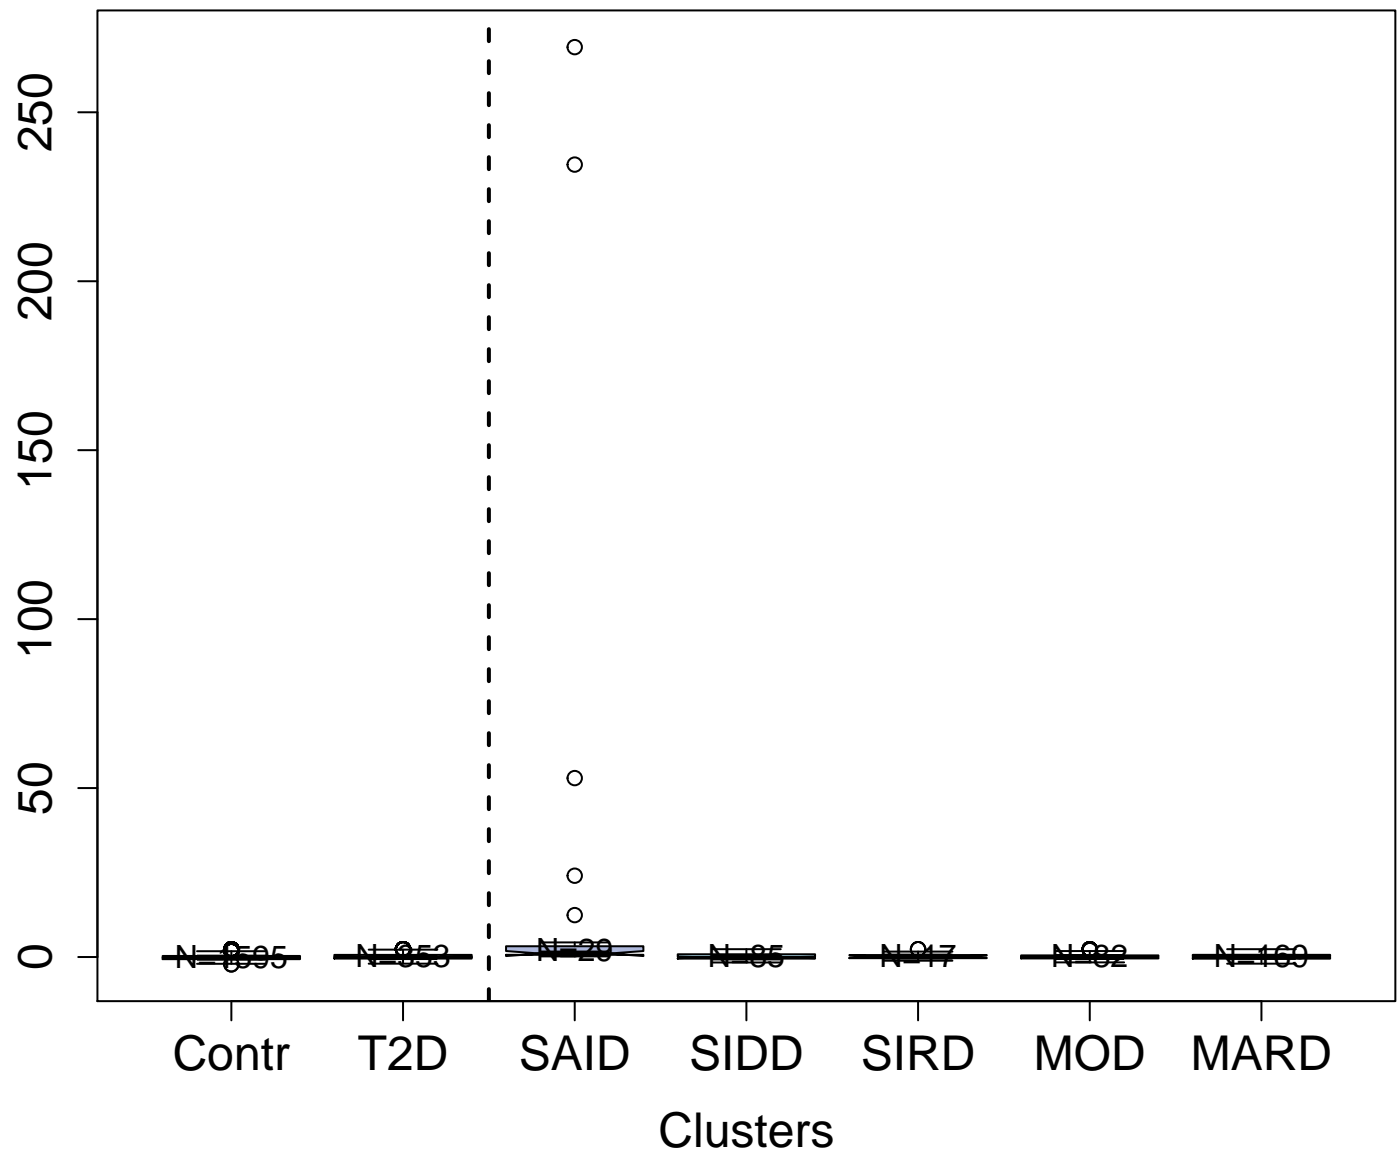

M1515 : salicylate

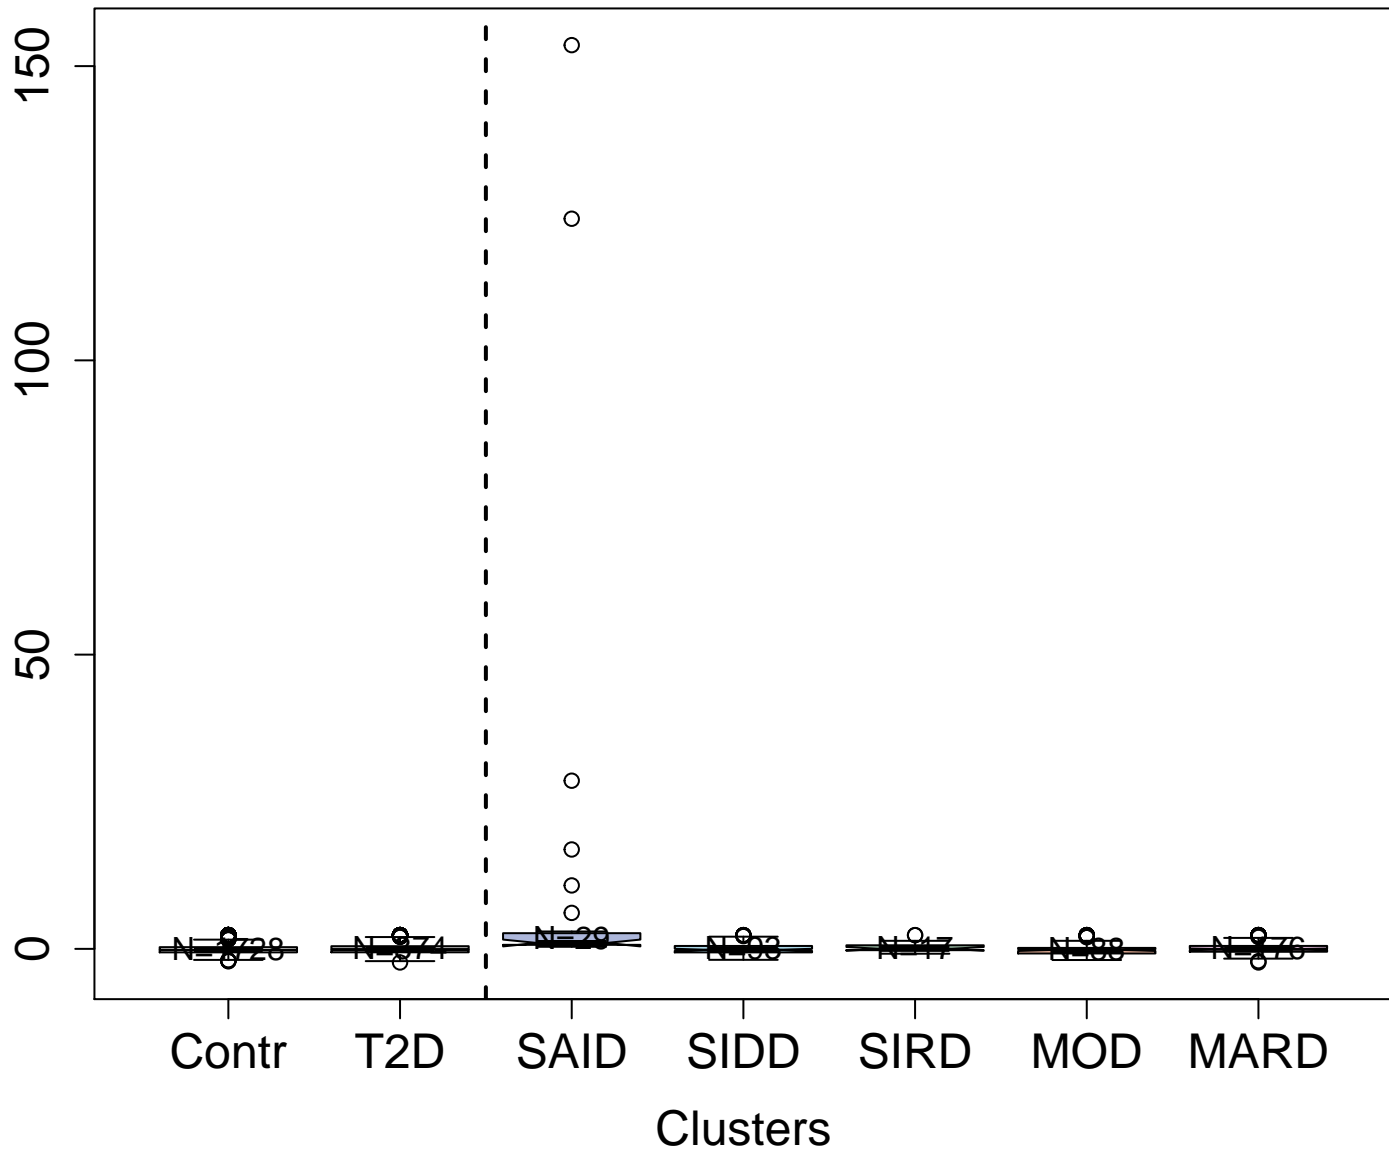

M15749 : 3-phenylpropionate (hydrocinnamate)

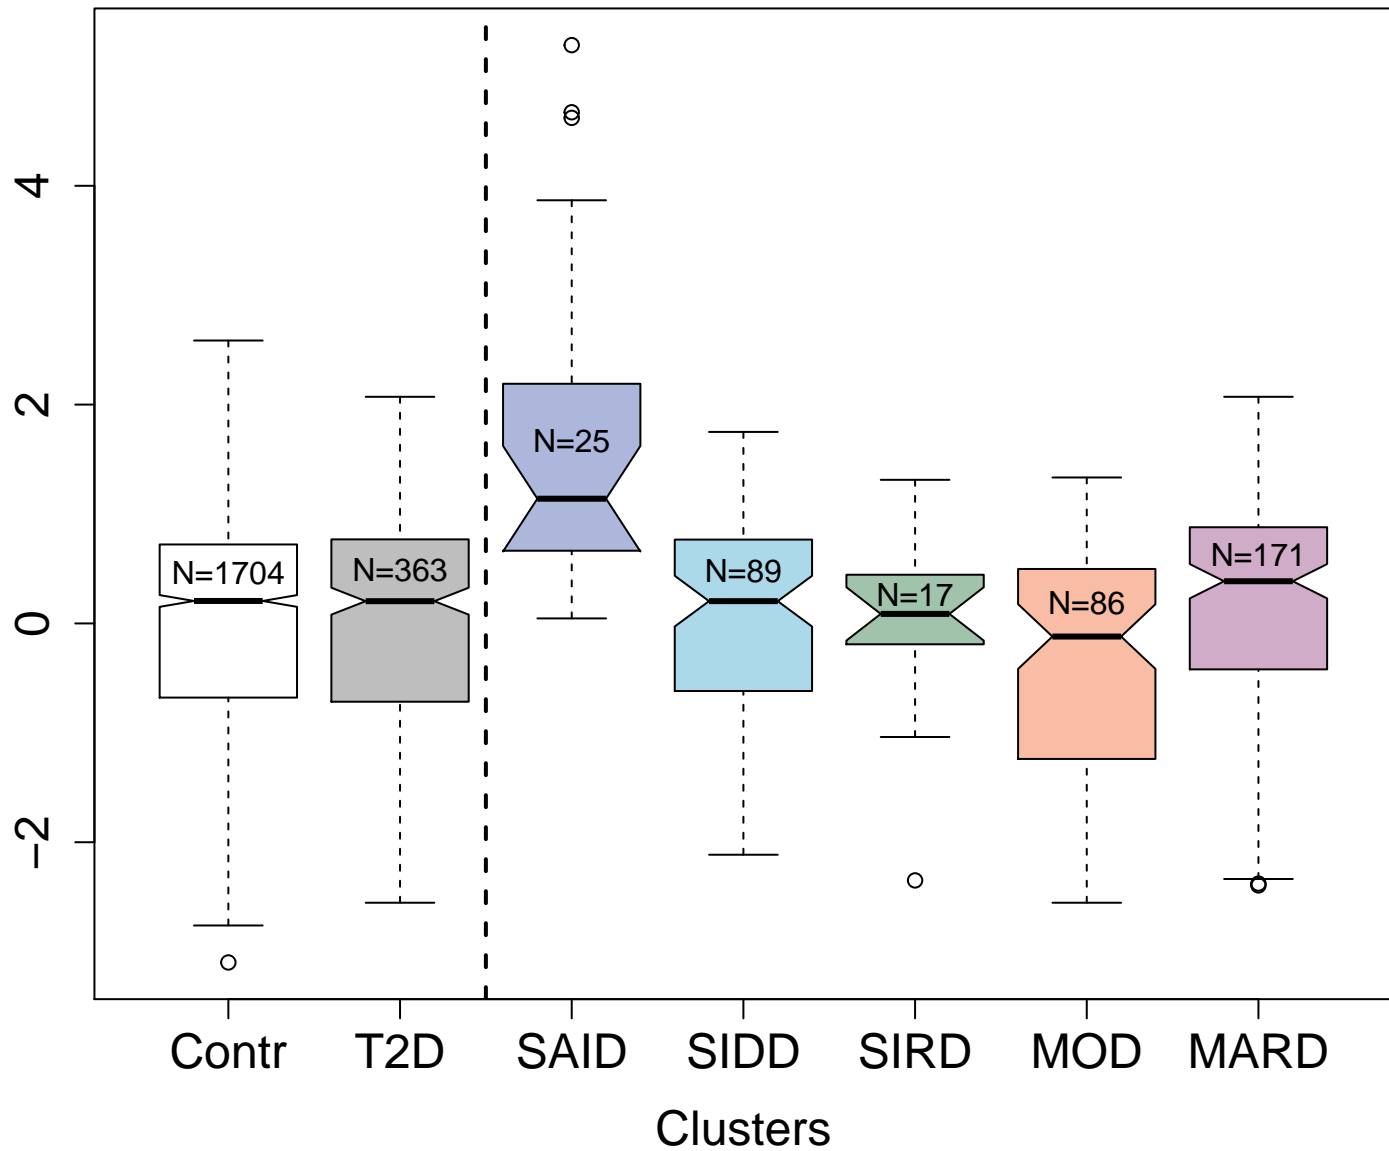

M46932 : X - 12104

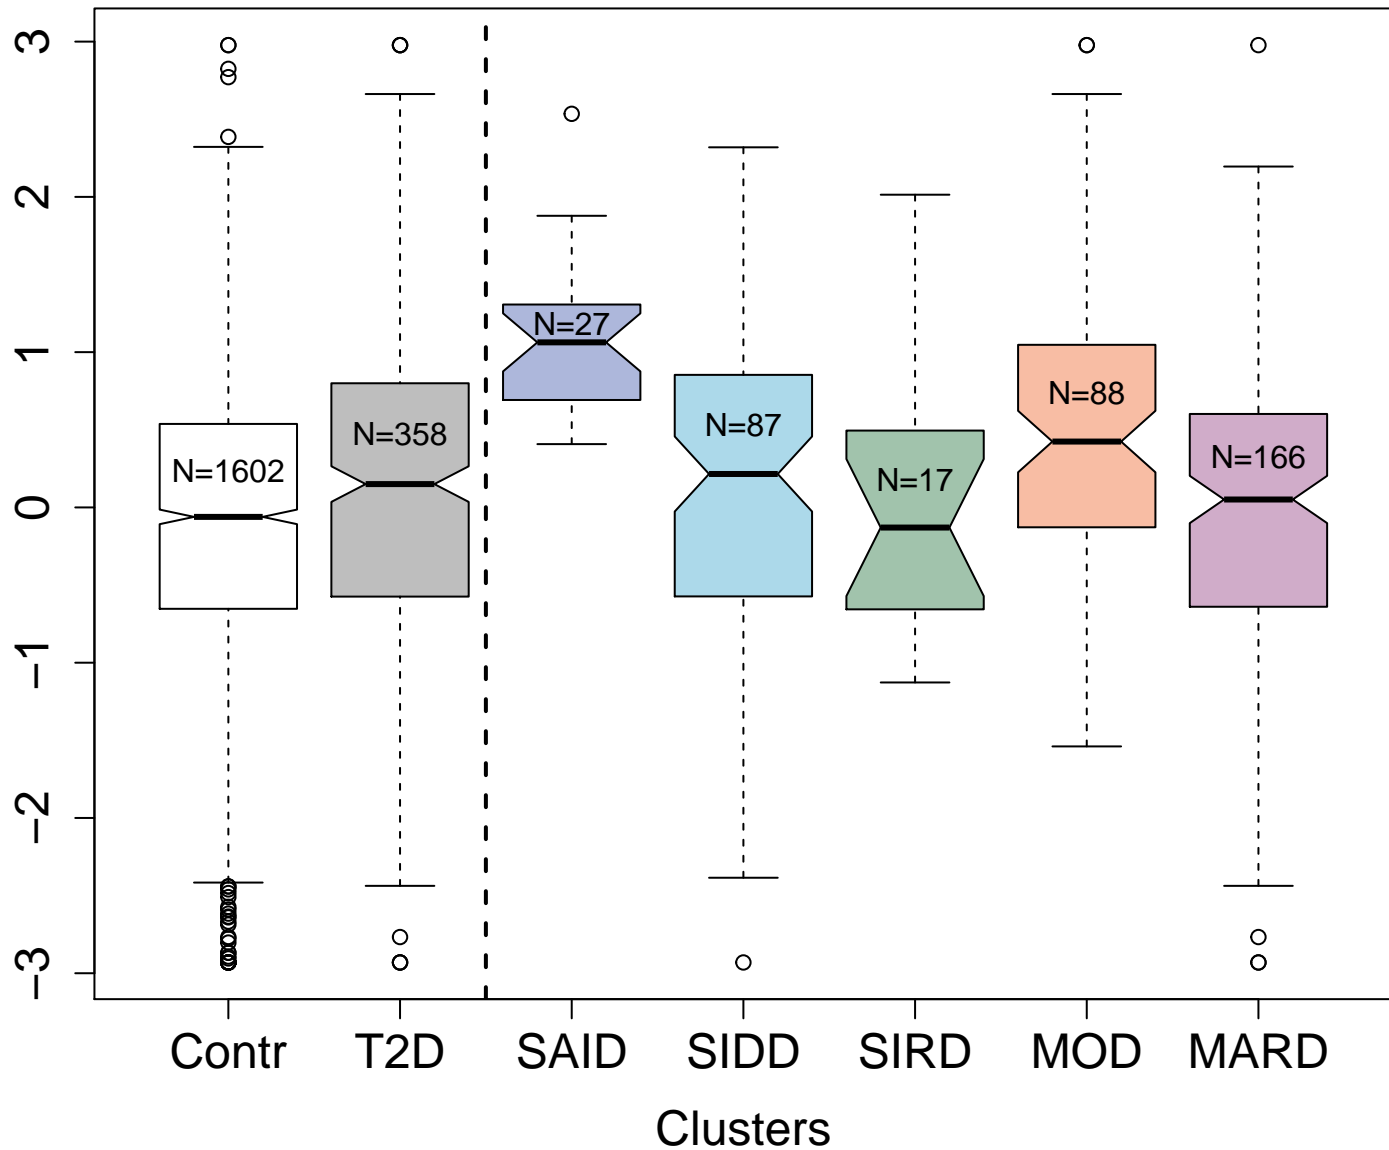

M43258 : acisoga

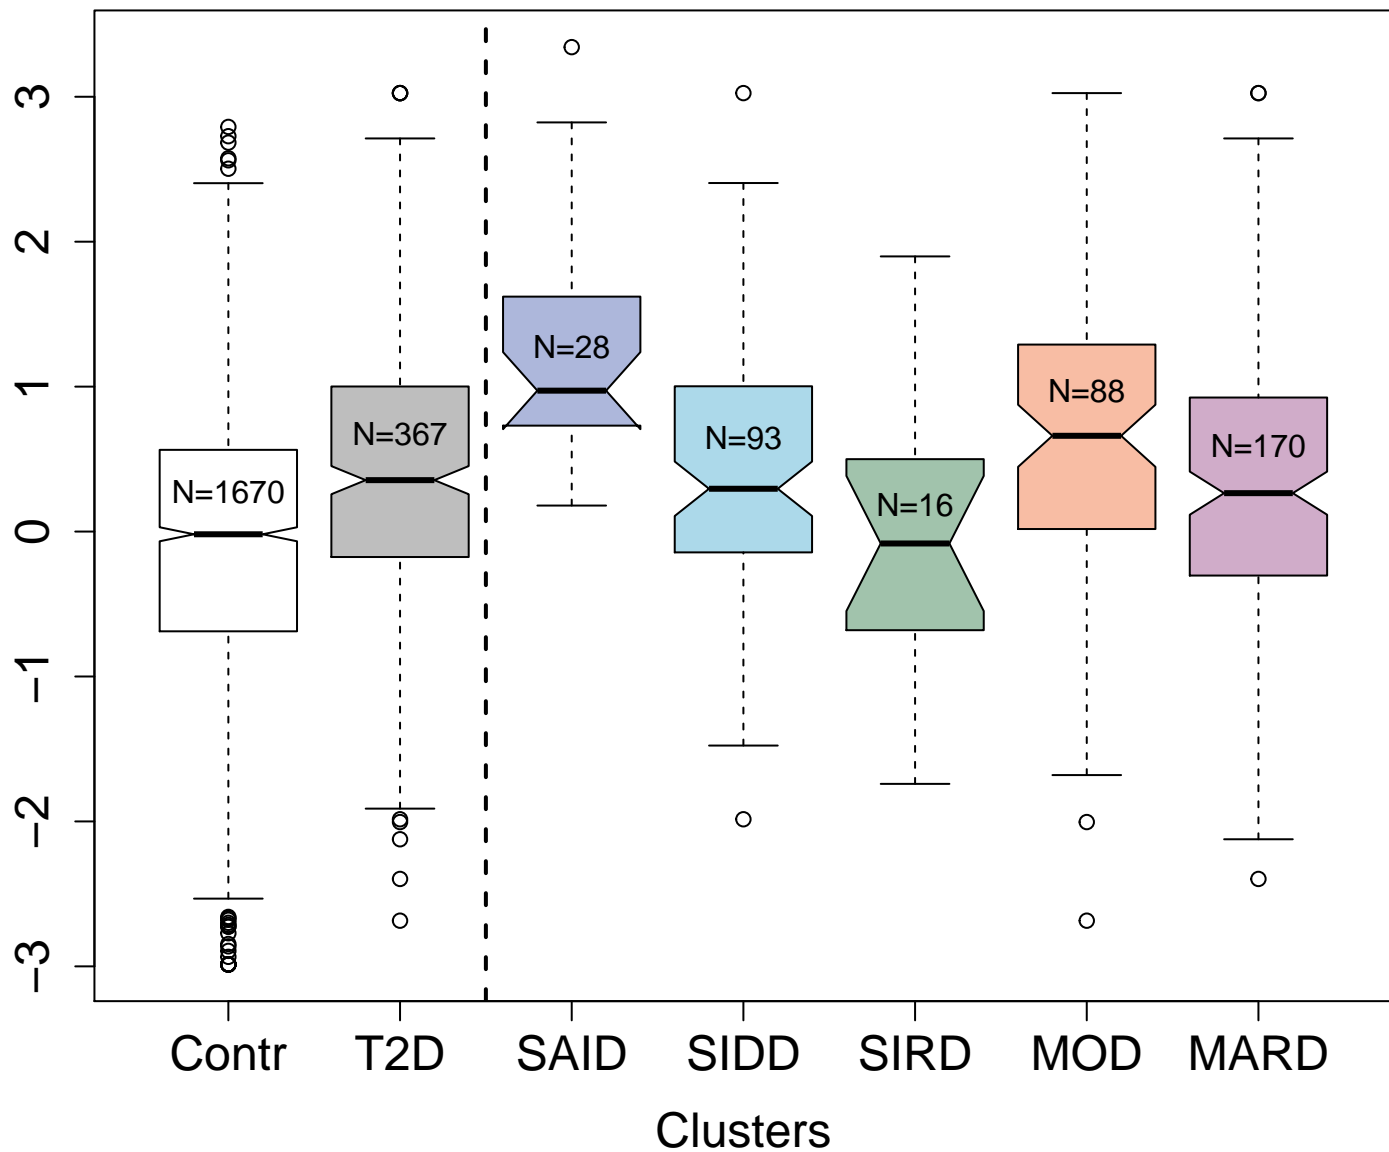



M46607 : X - 11849

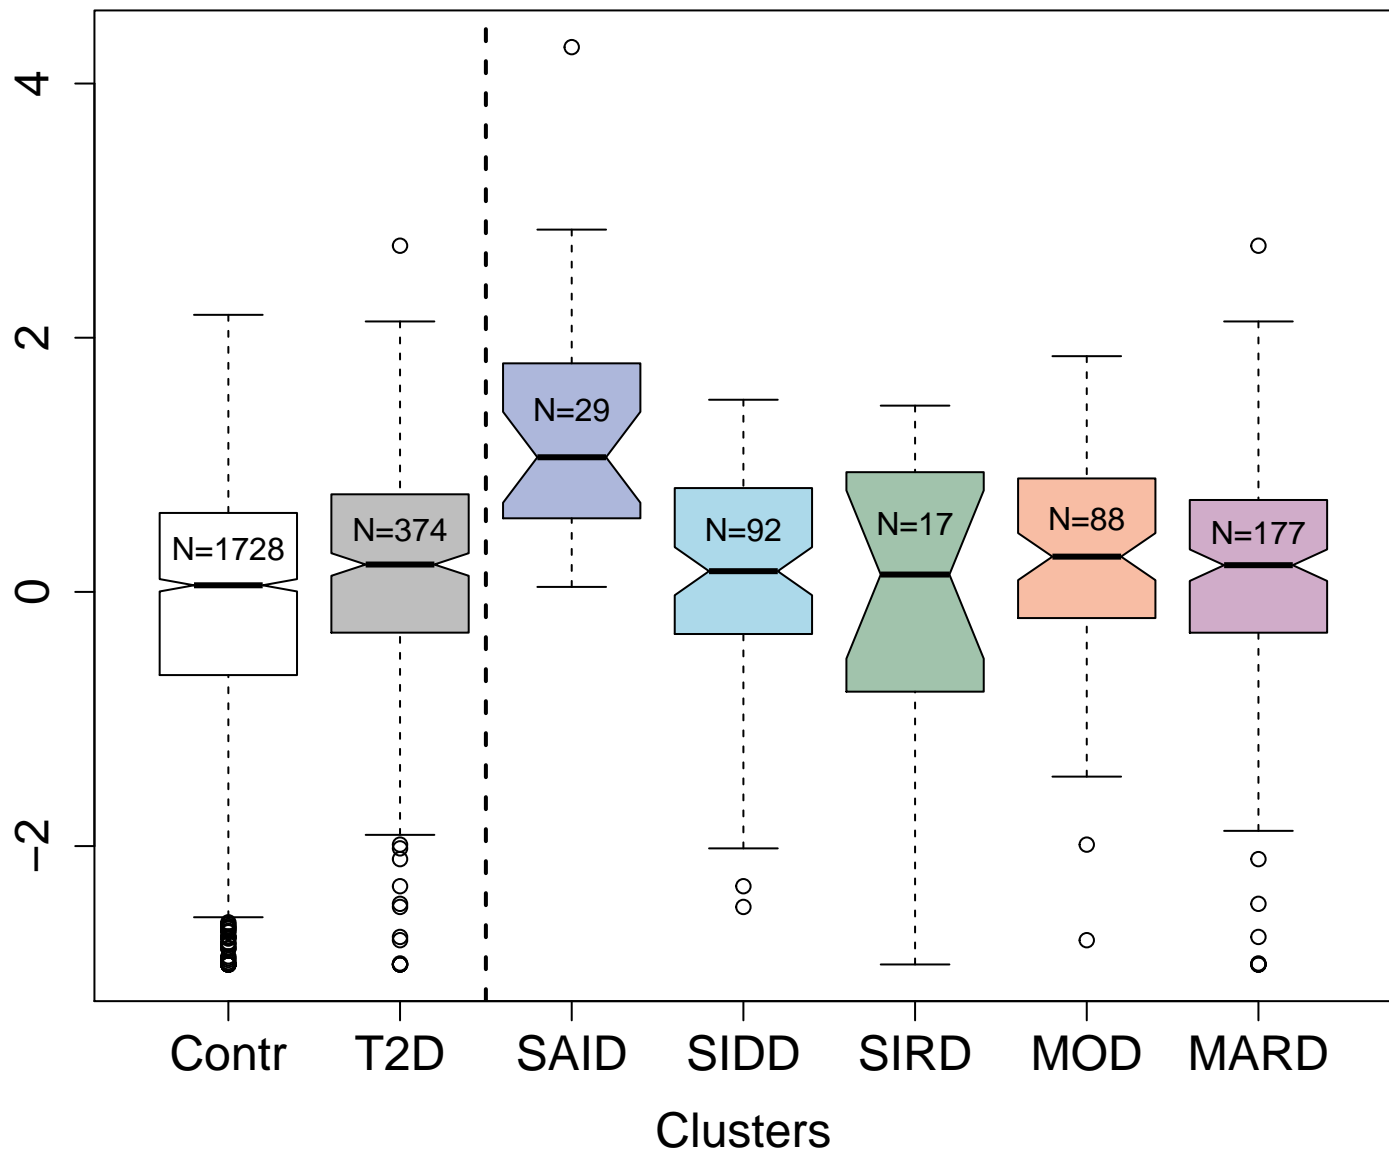

M62494 : X - 25265

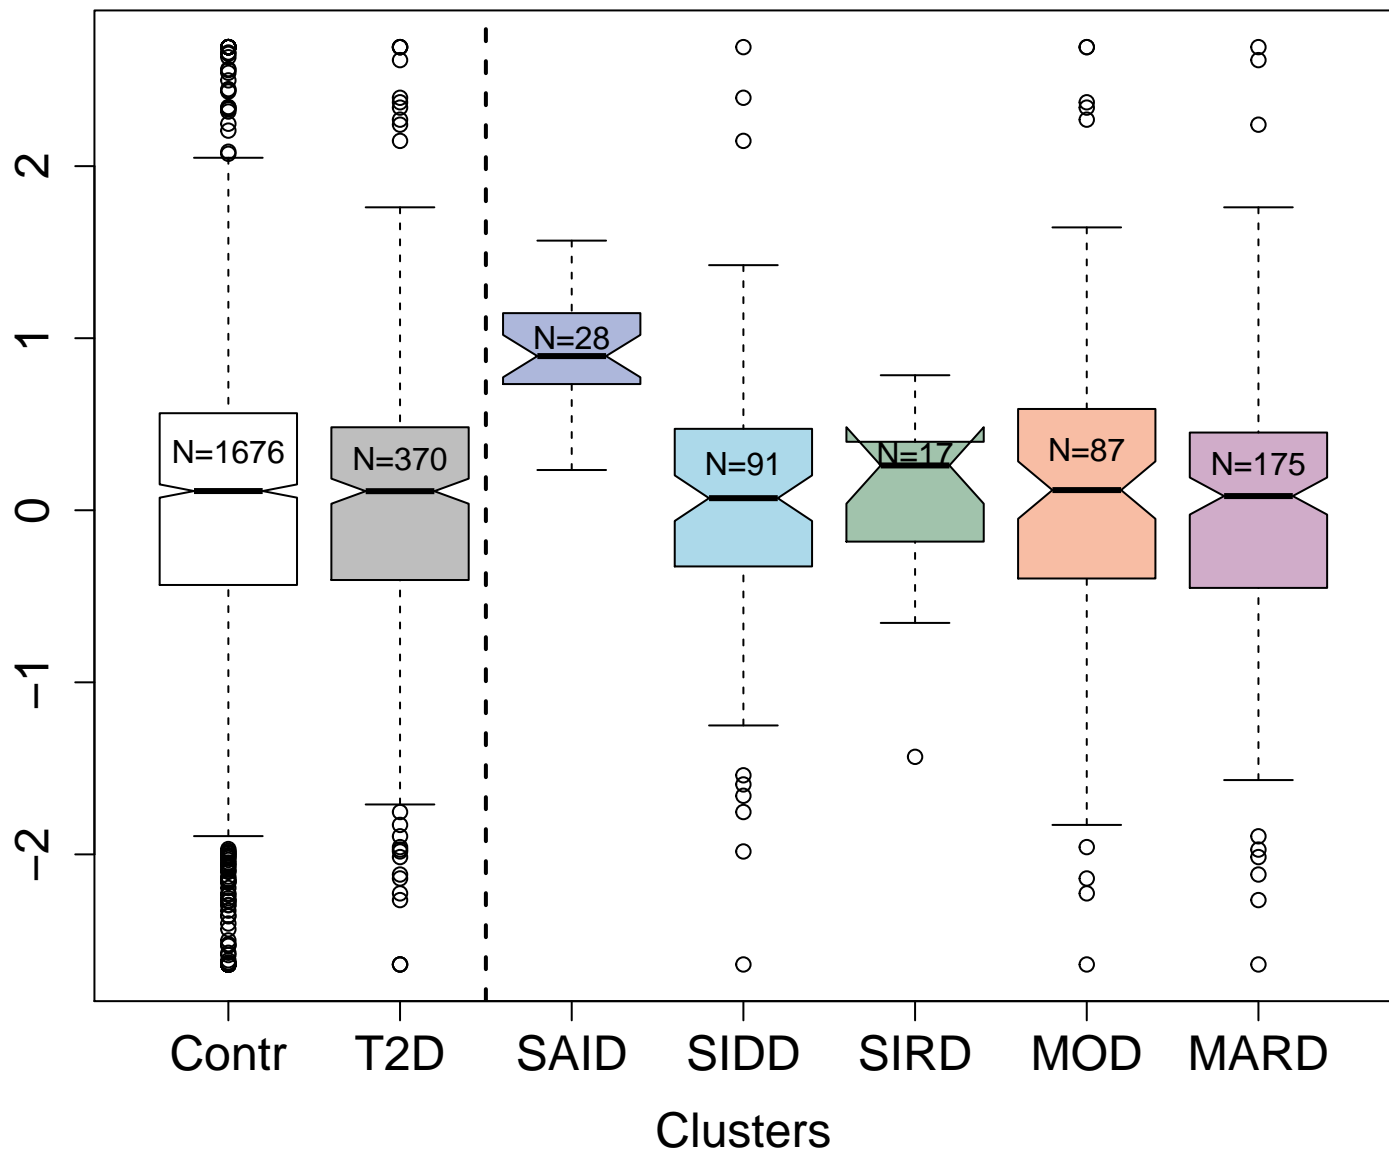

M62066 : glyco-beta-muricholate\*\*

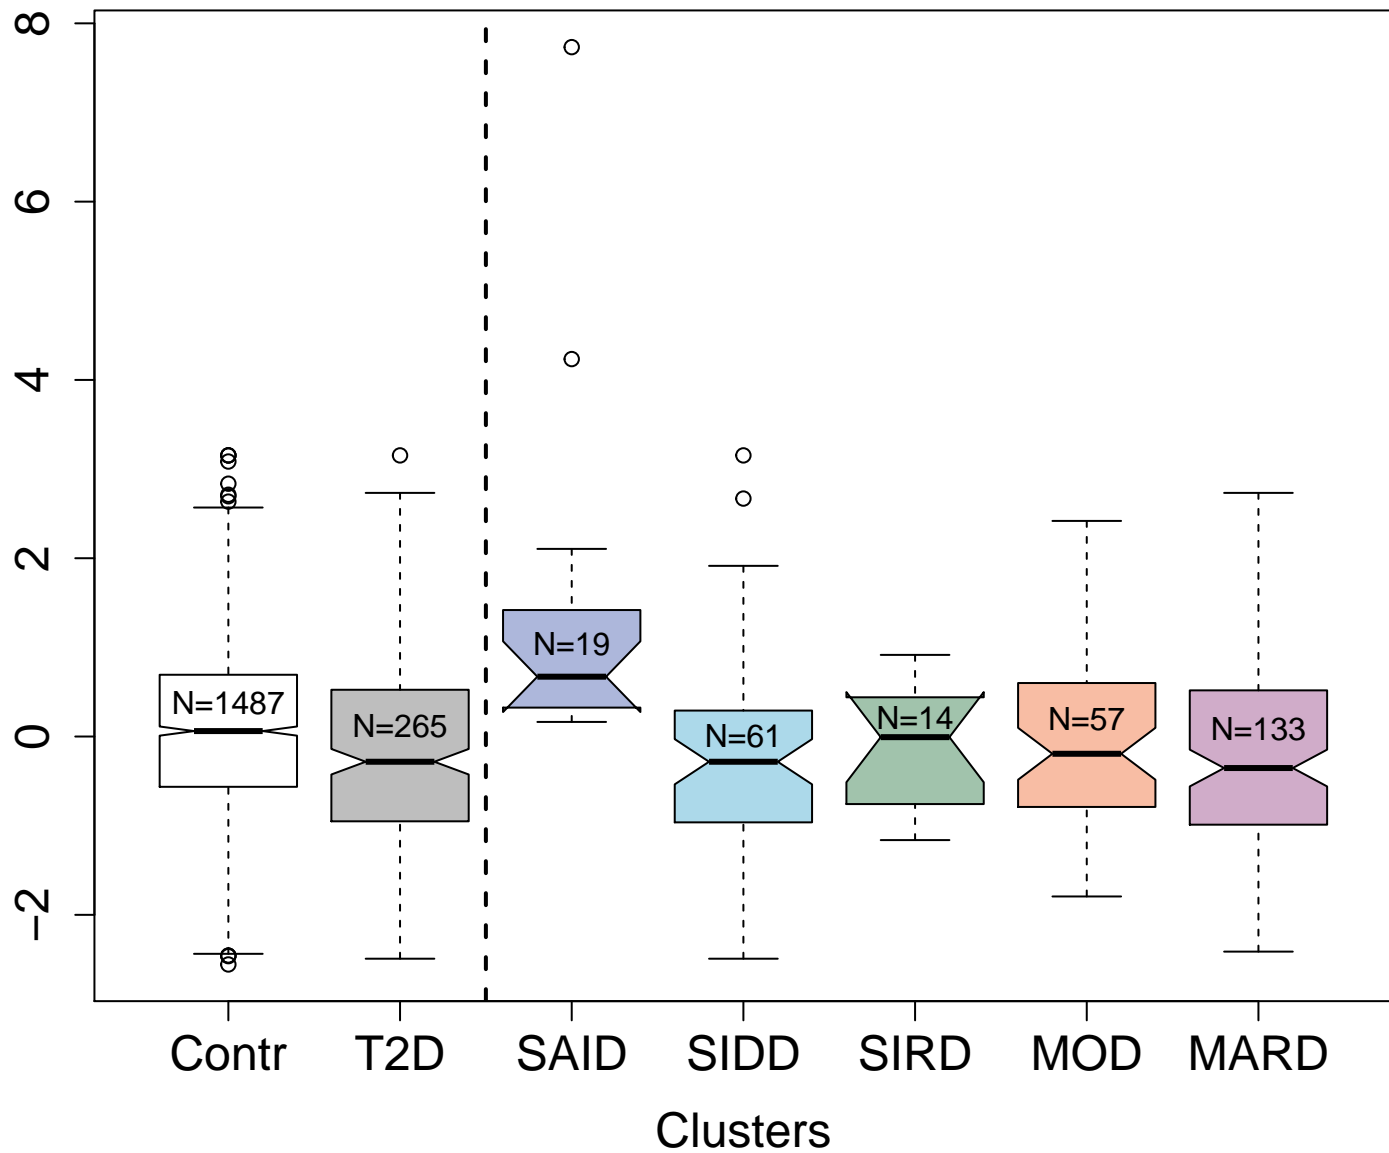

M57814 : (N(1) + N(8)) - acetylspemidine

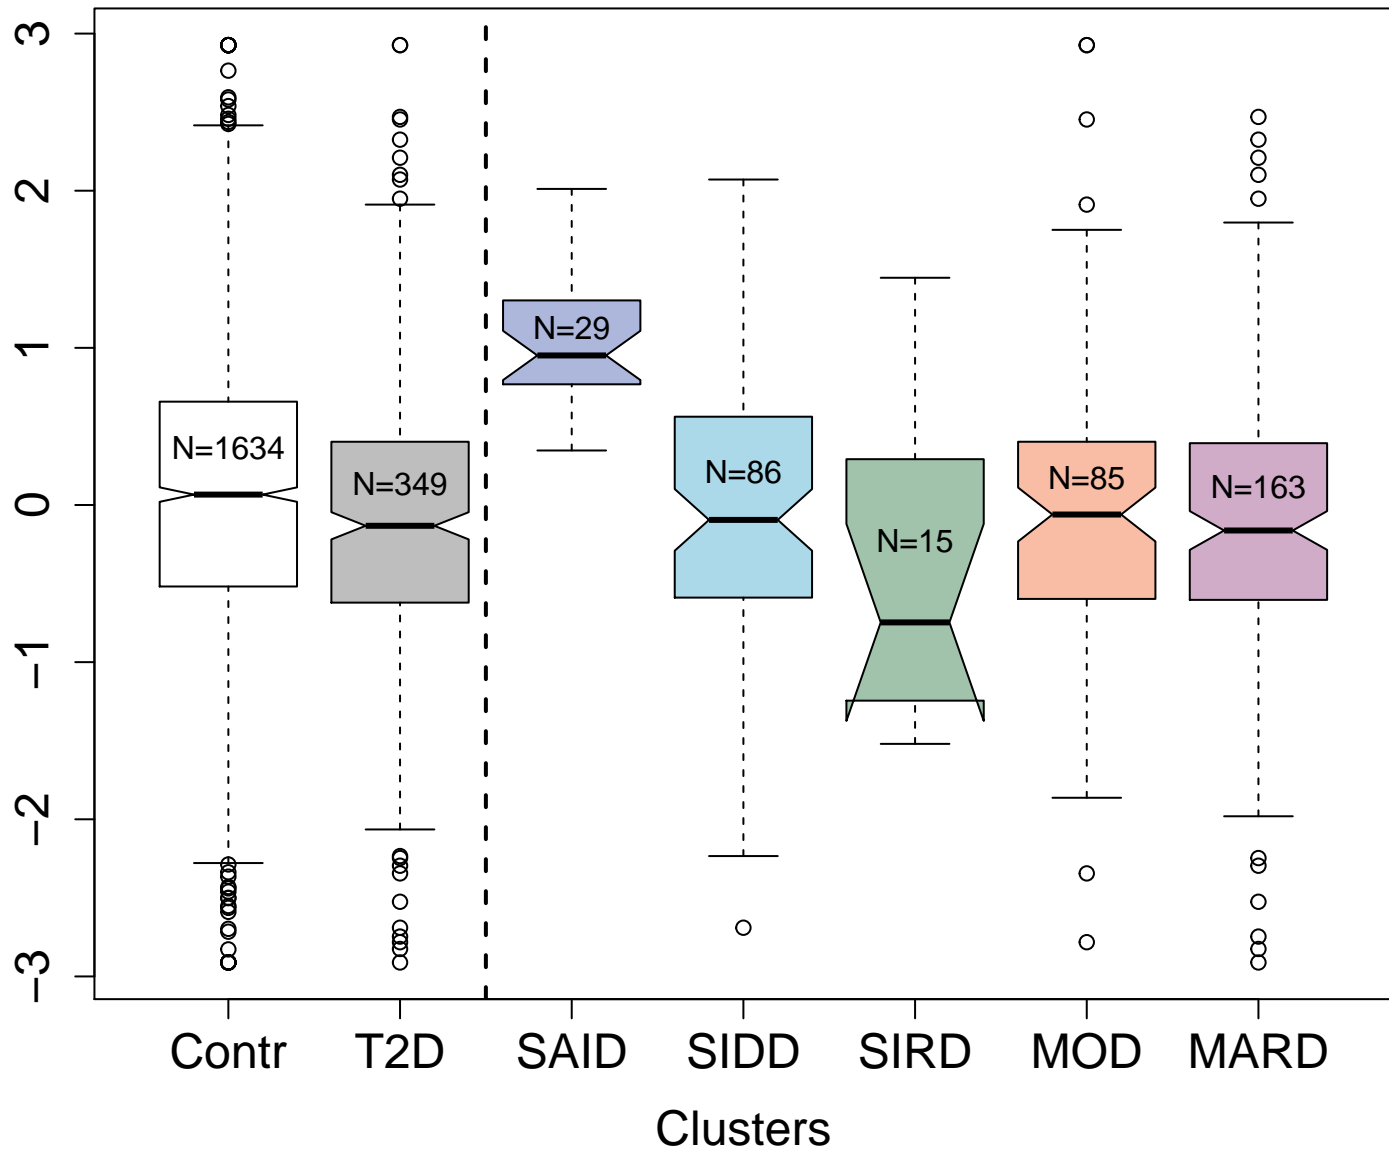

M46417 : X - 13866

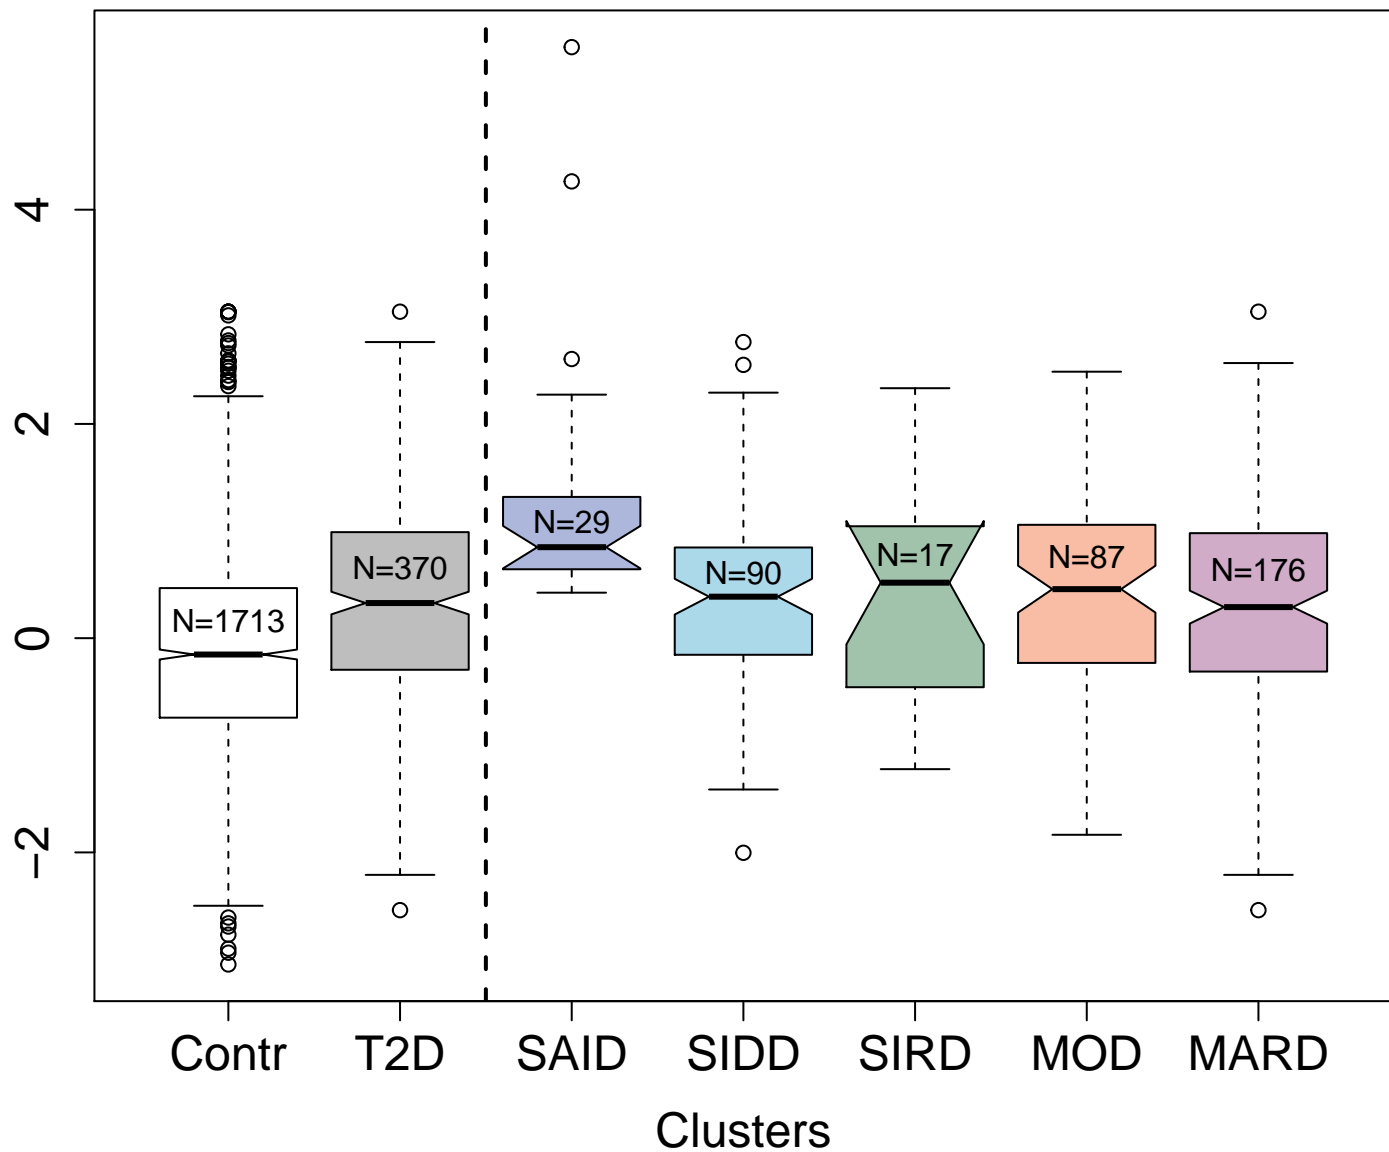

M63230 : 5-hydroxy-2-methylpyridine sulfate

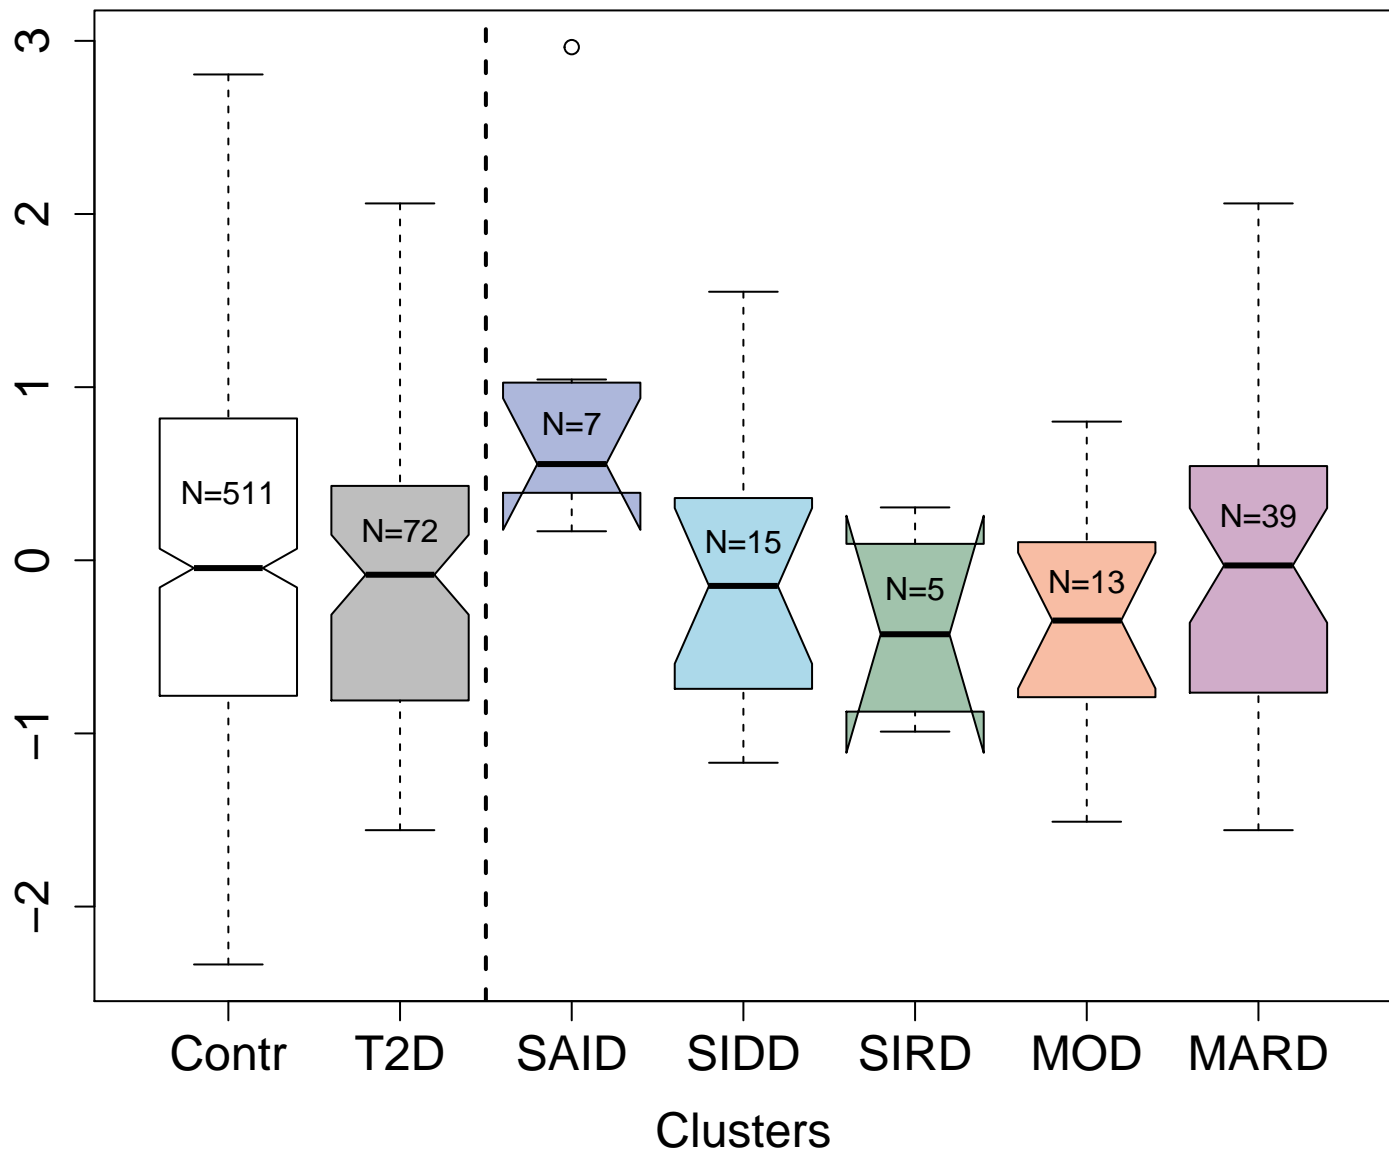

M62918 : tetradecadienedioate (C14:2-DC)\*

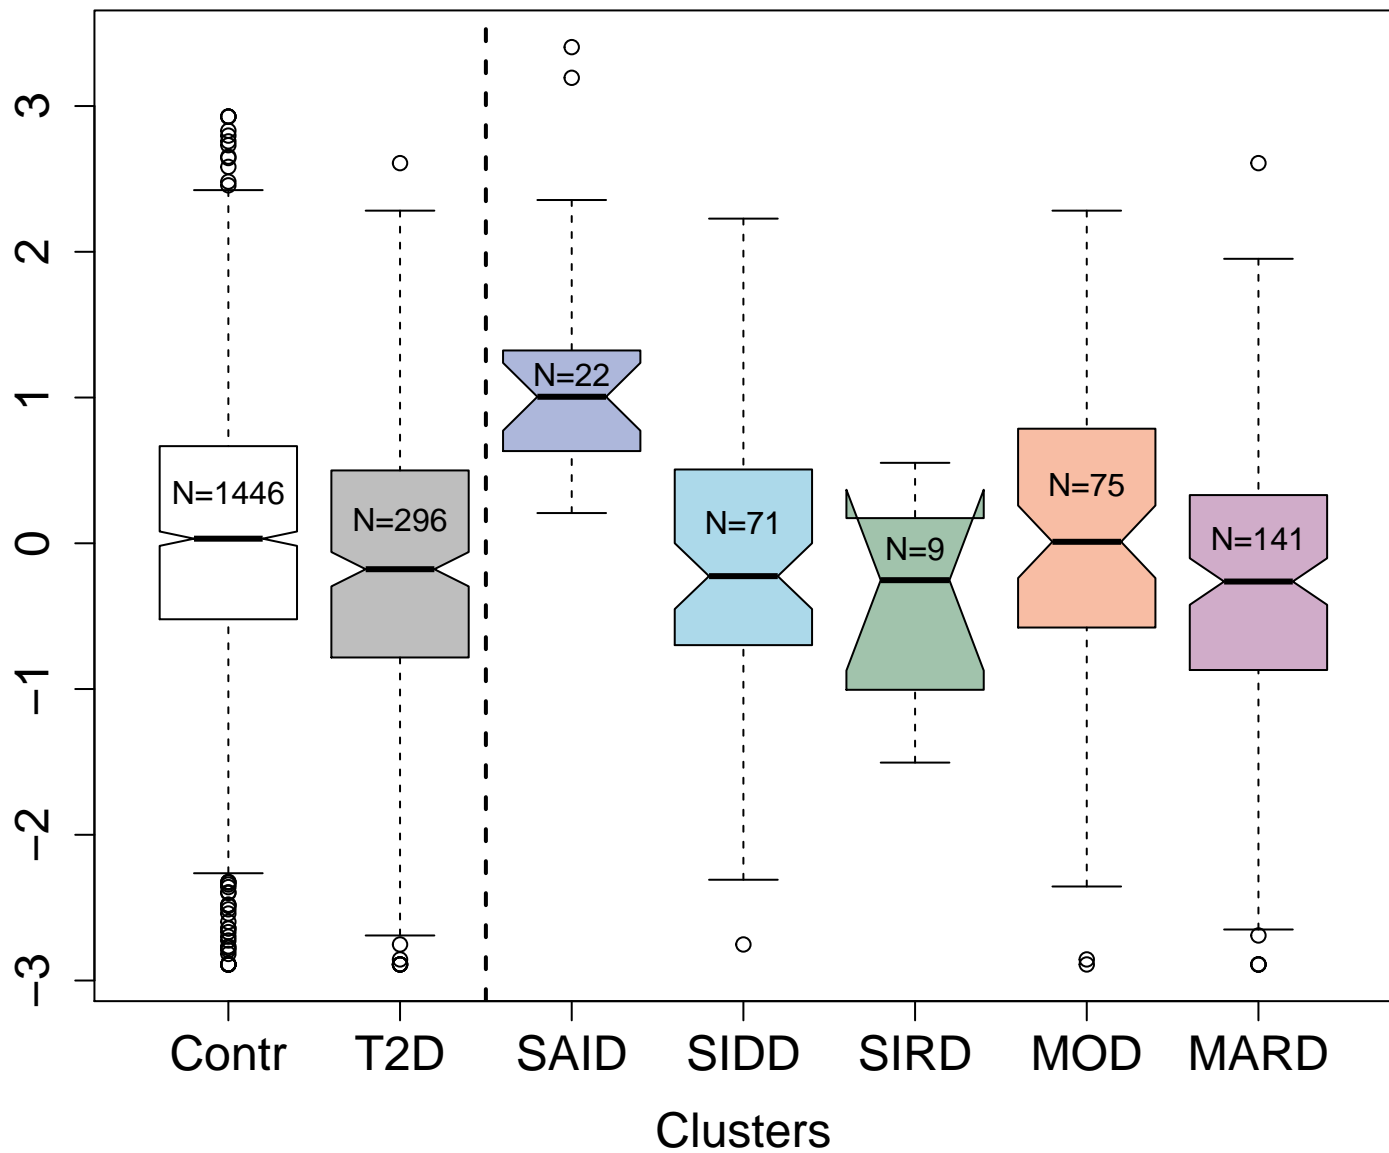

M54885 : 1-linoleoyl-GPG (18:2)\*

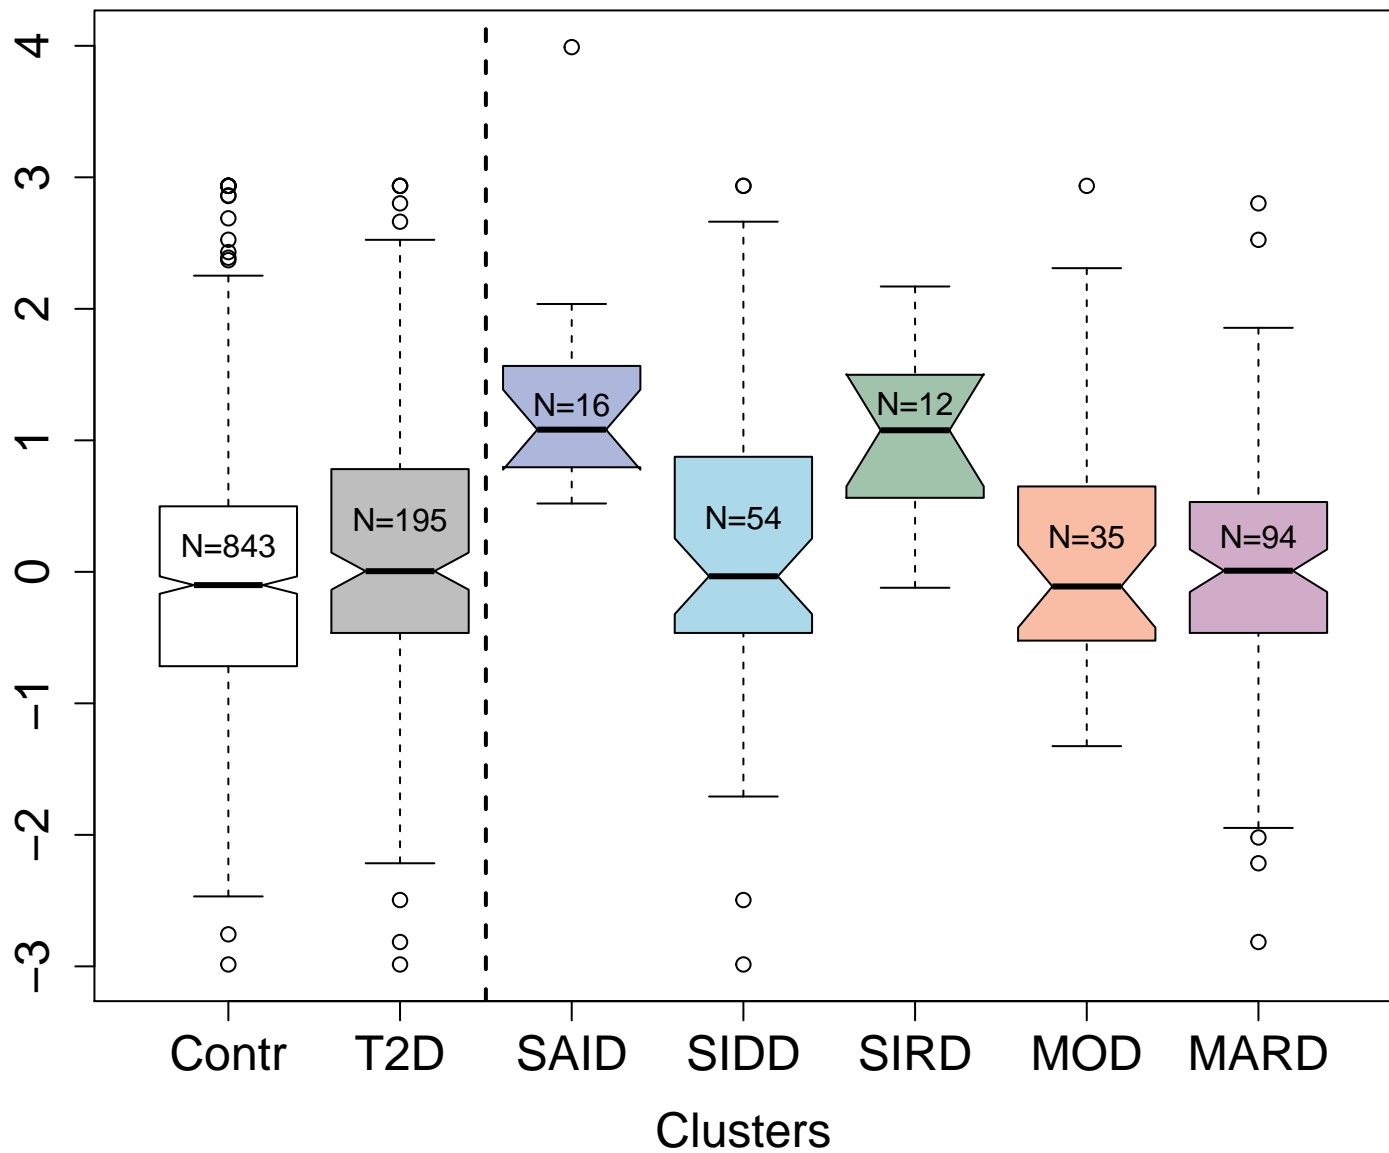



M18362 : azelate (C9-DC)

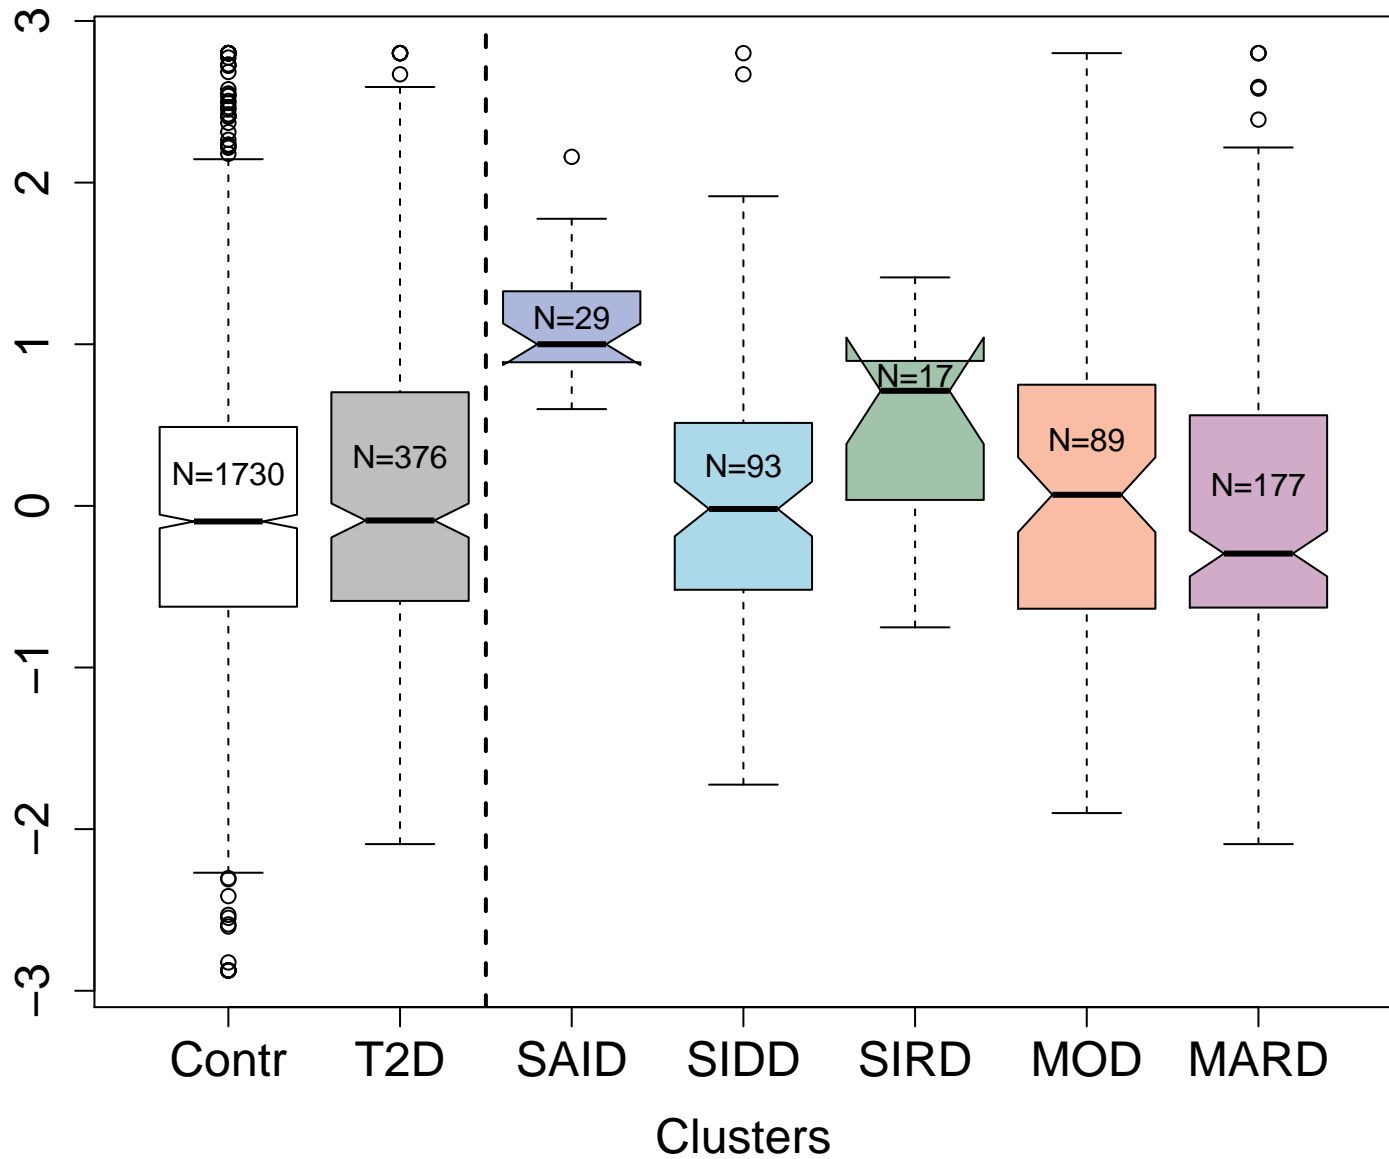

M34428 : 1-palmitoyl-GPA (16:0)

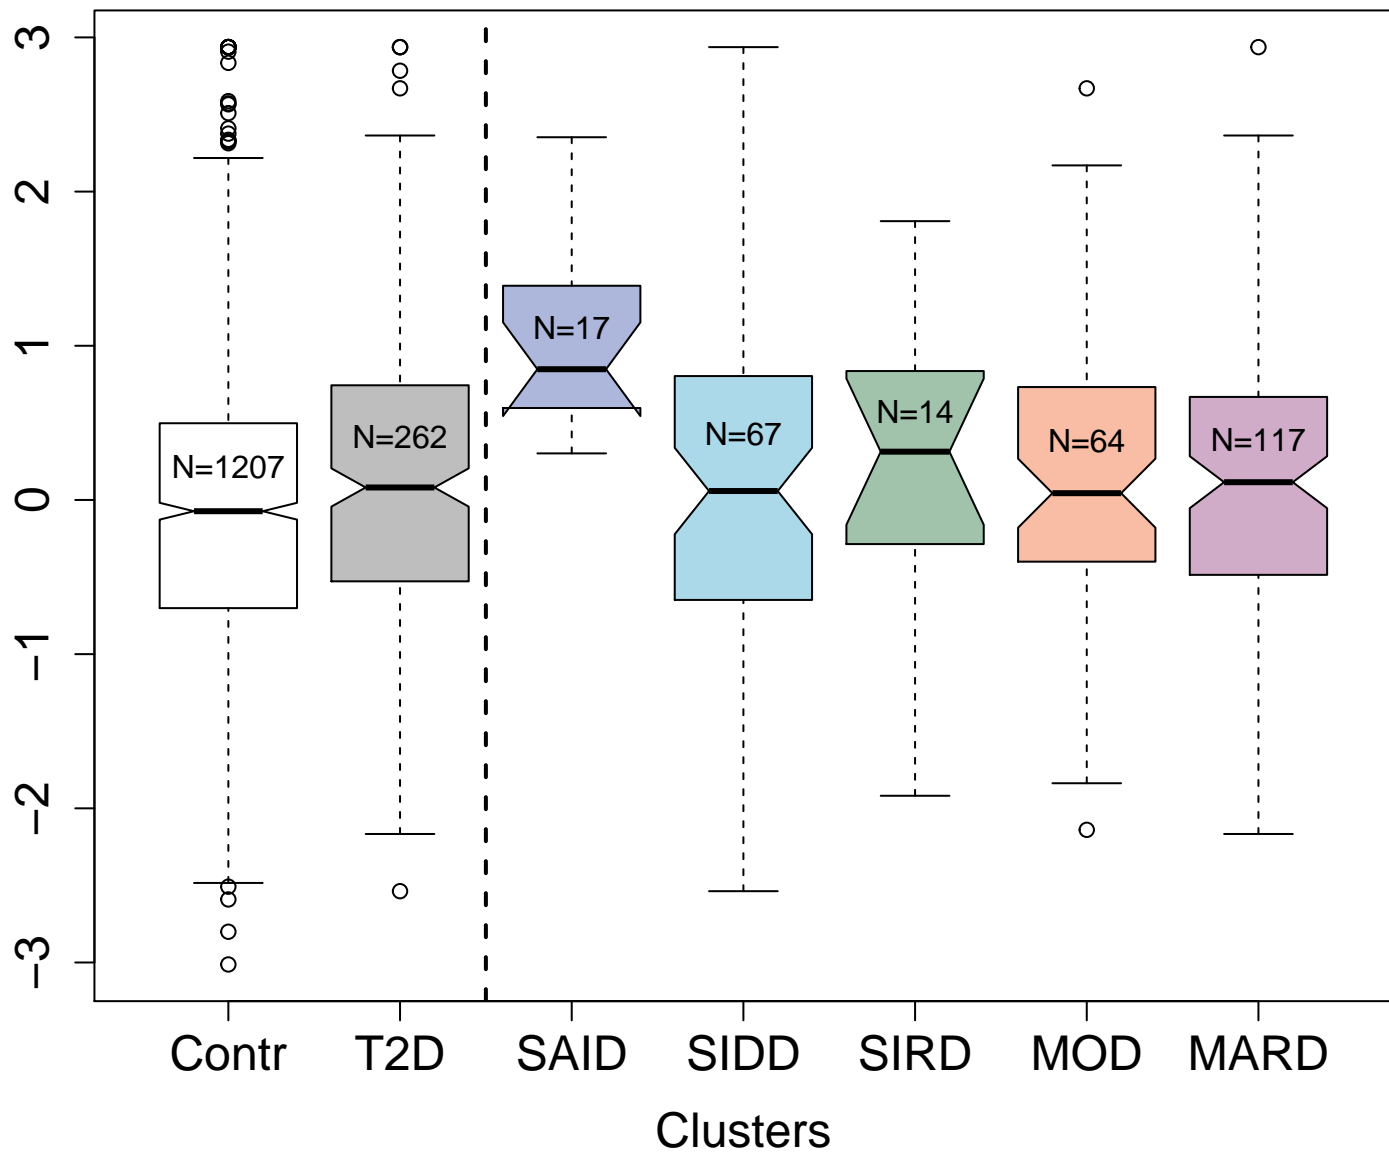

M62530 : 3-hydroxyhippurate sulfate

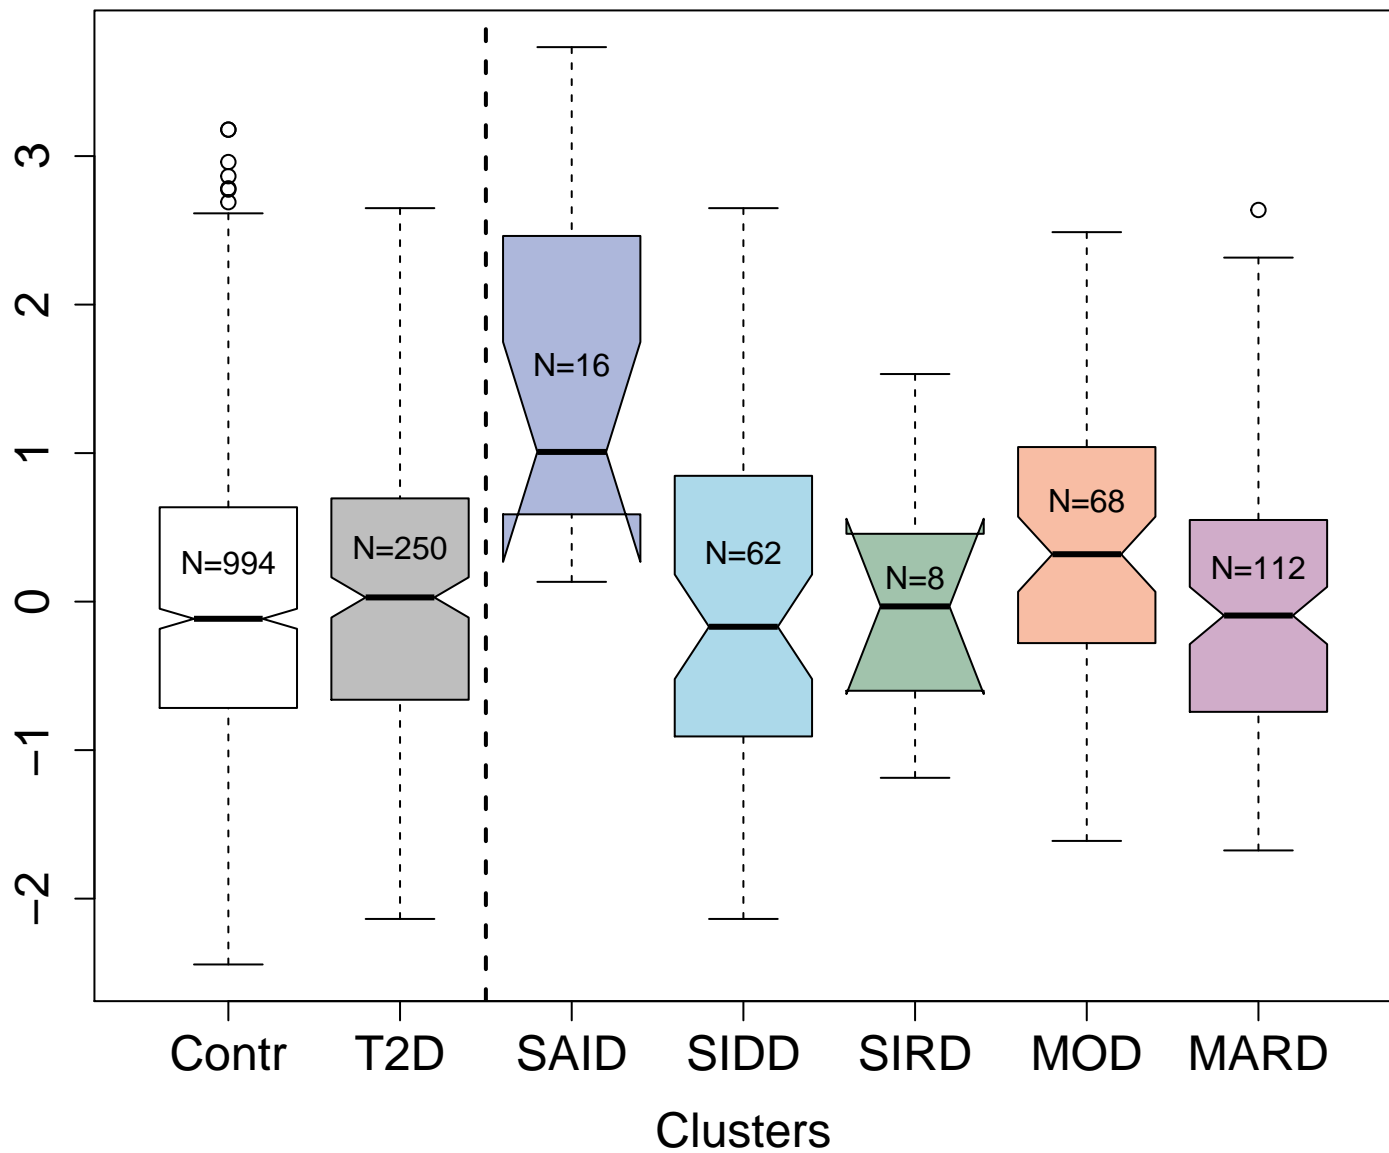

M46384 : X - 21339

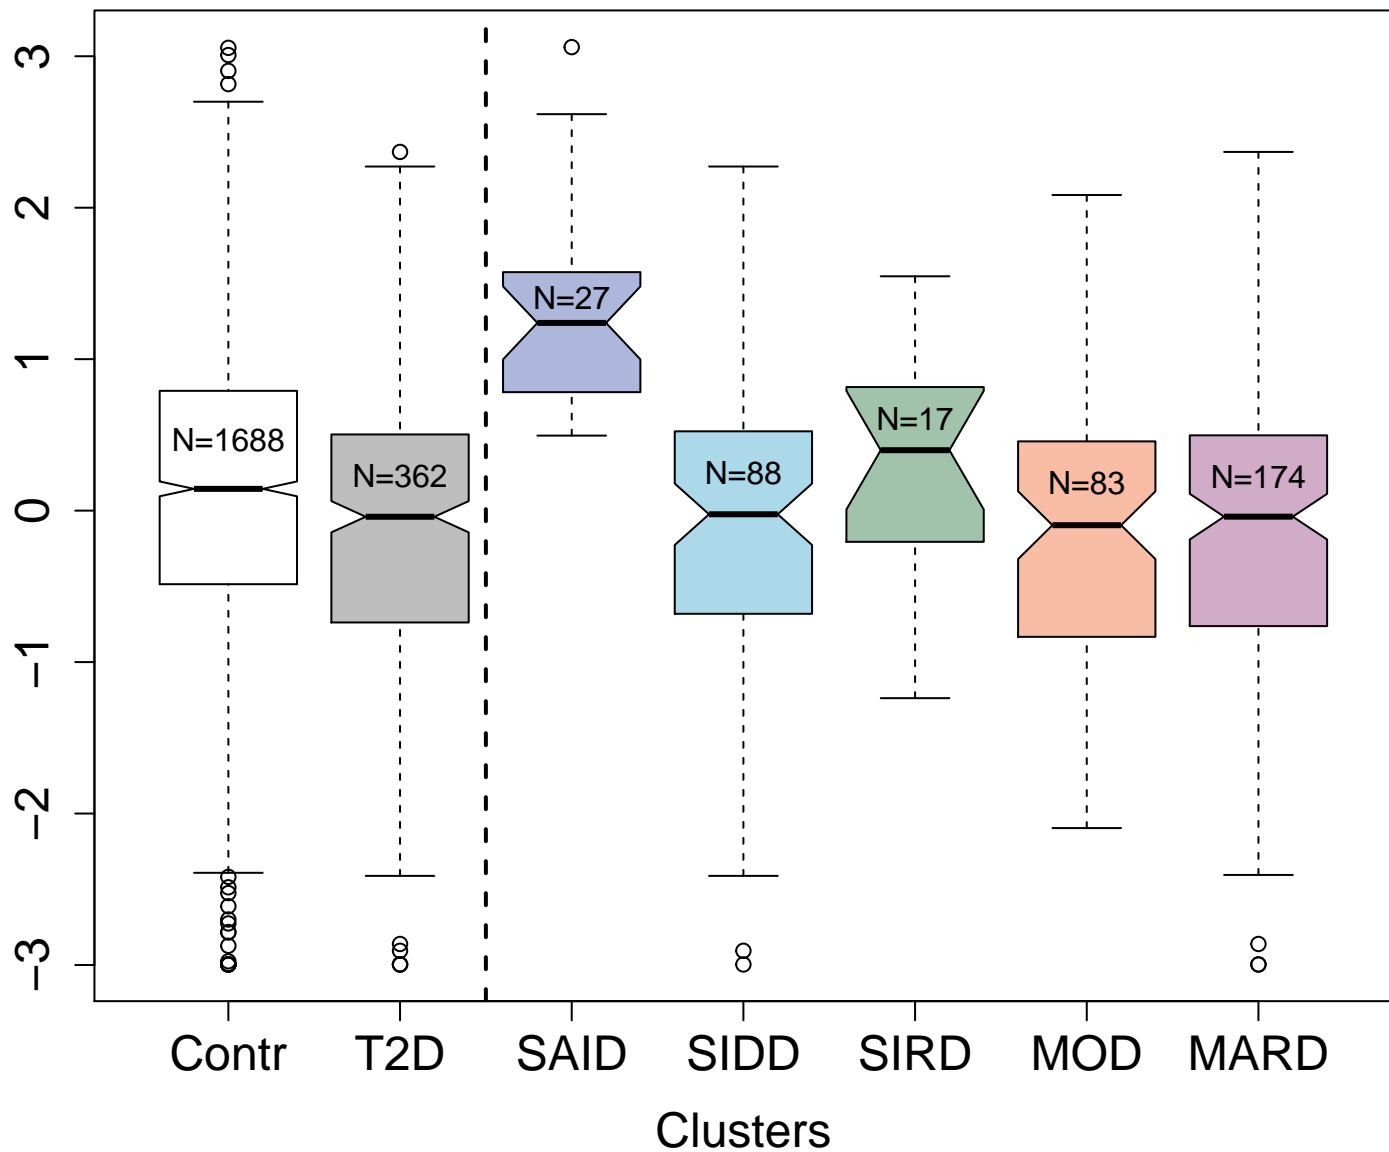

M46664 : X - 15664

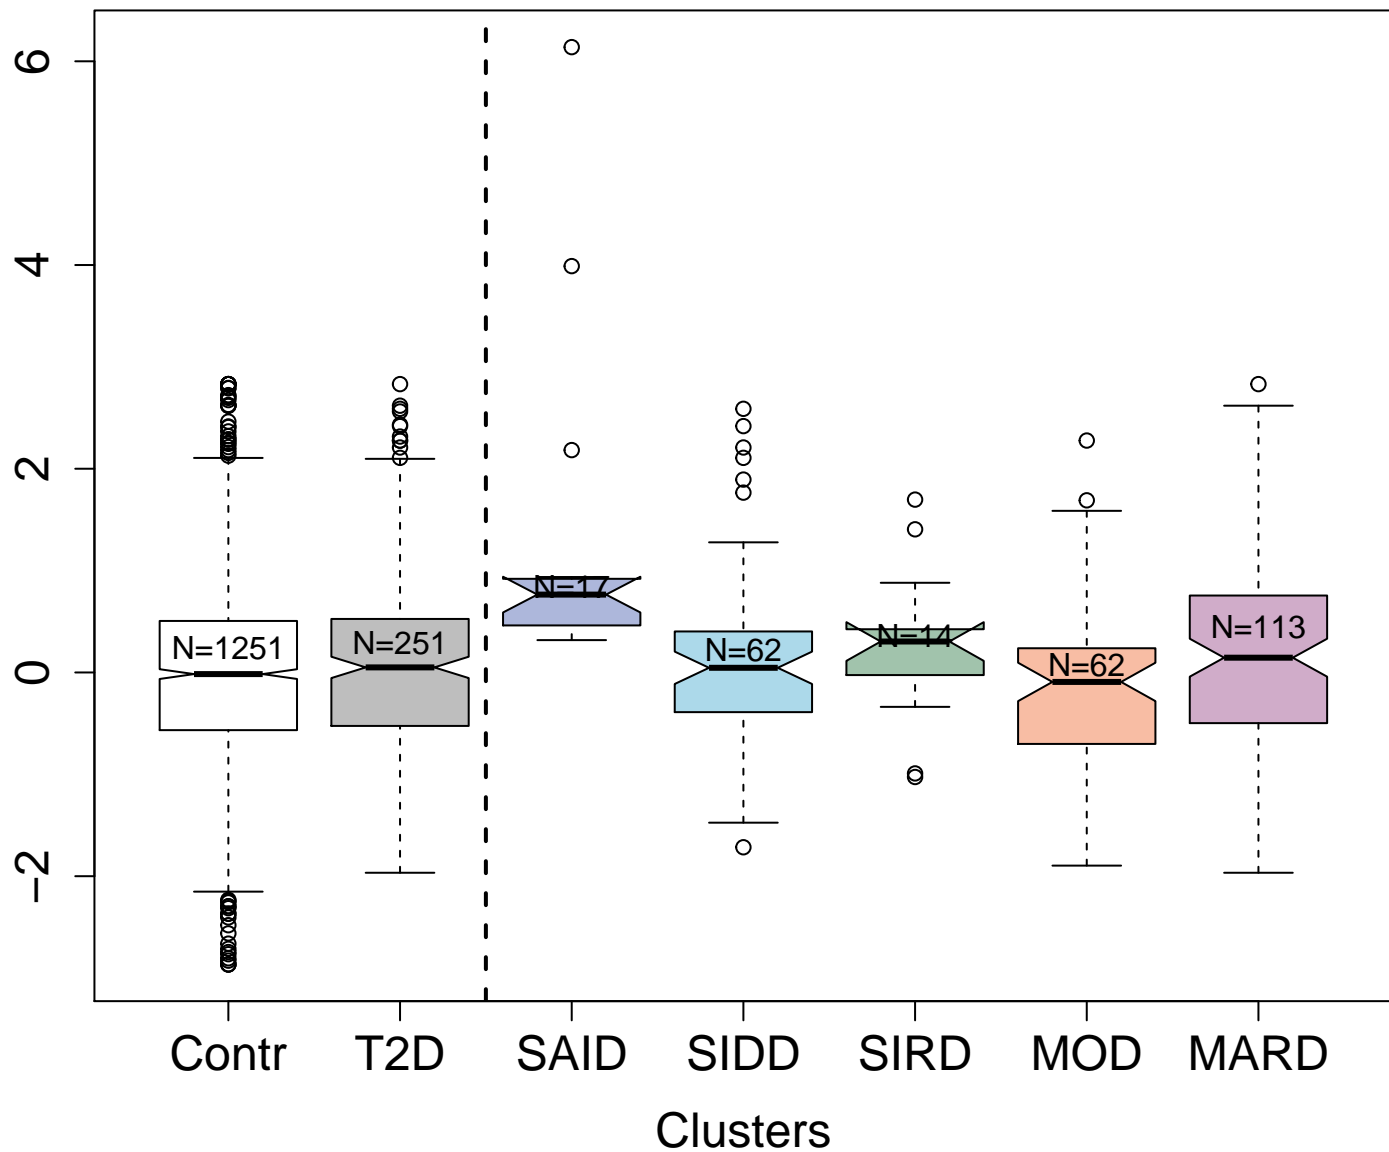

M37063 : gamma-glutamylalanine

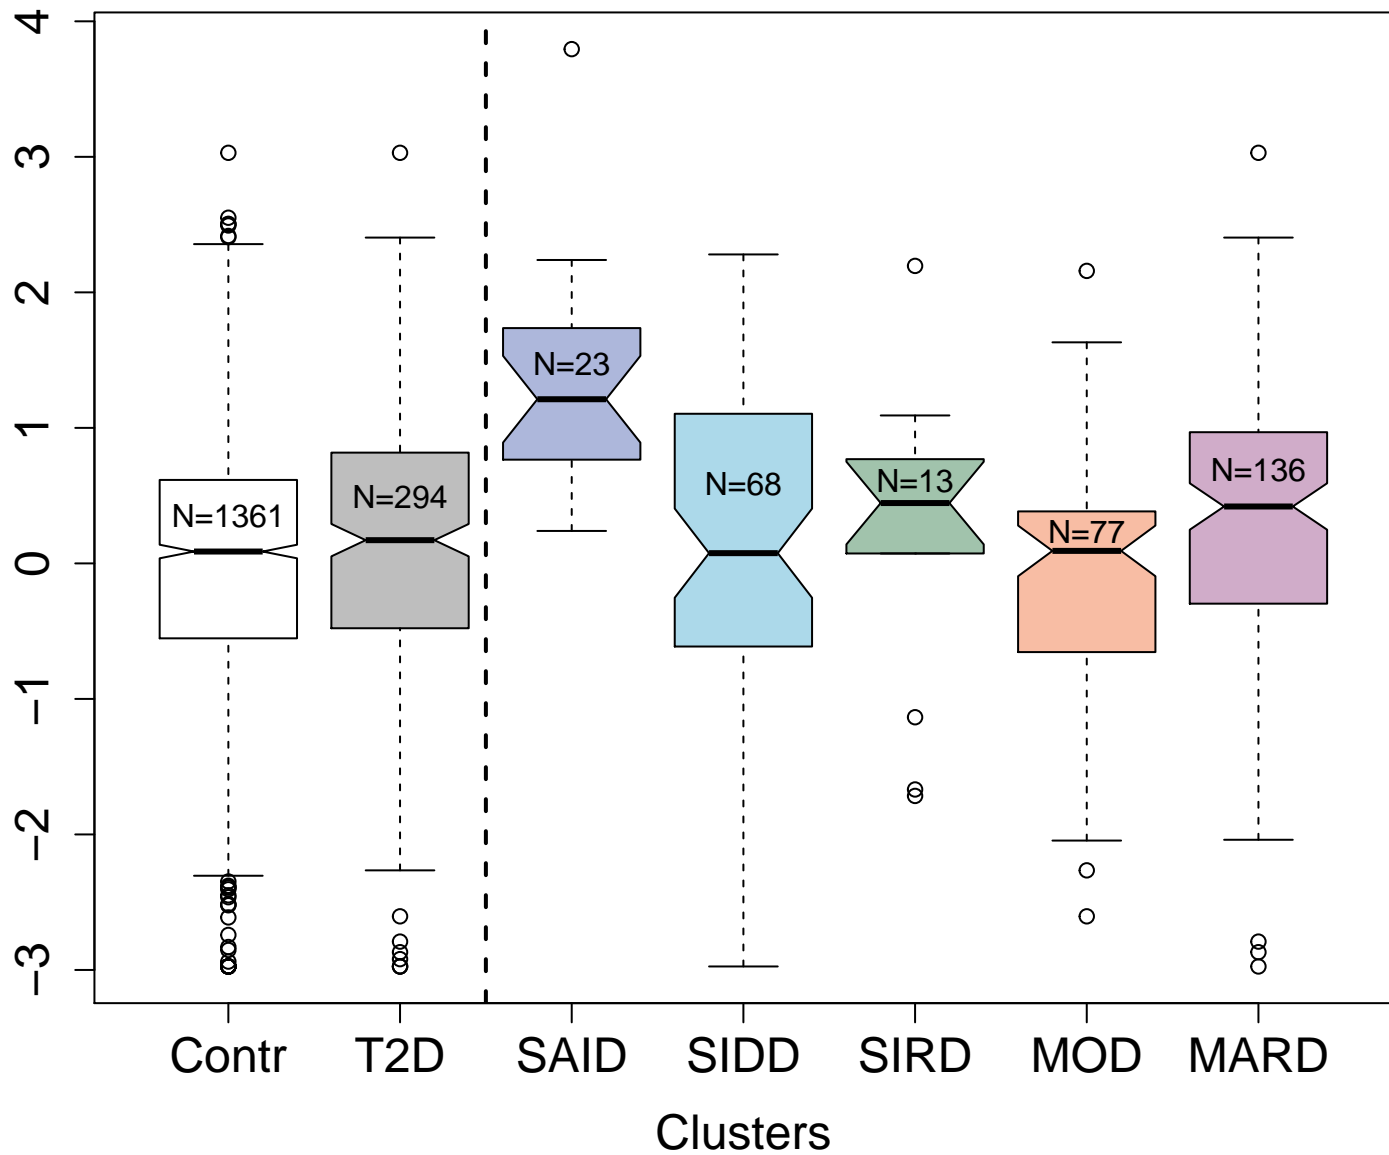

M48341 : 1-dihomo-linolenylglycerol (20:3)

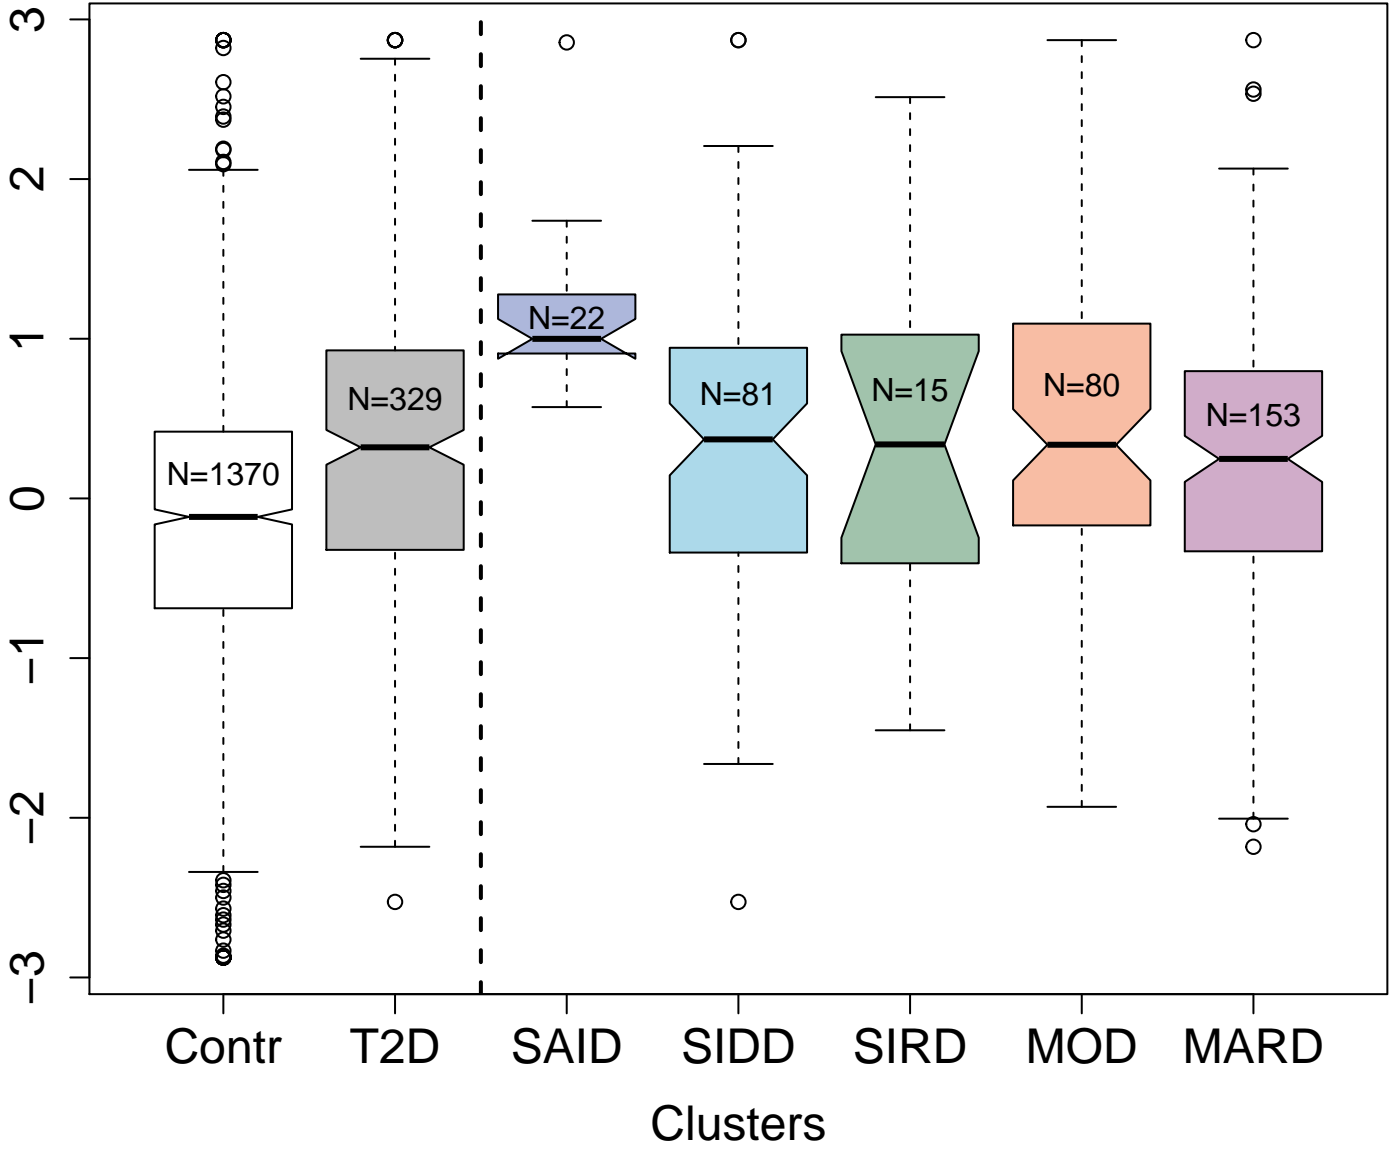

M15778 : benzoate

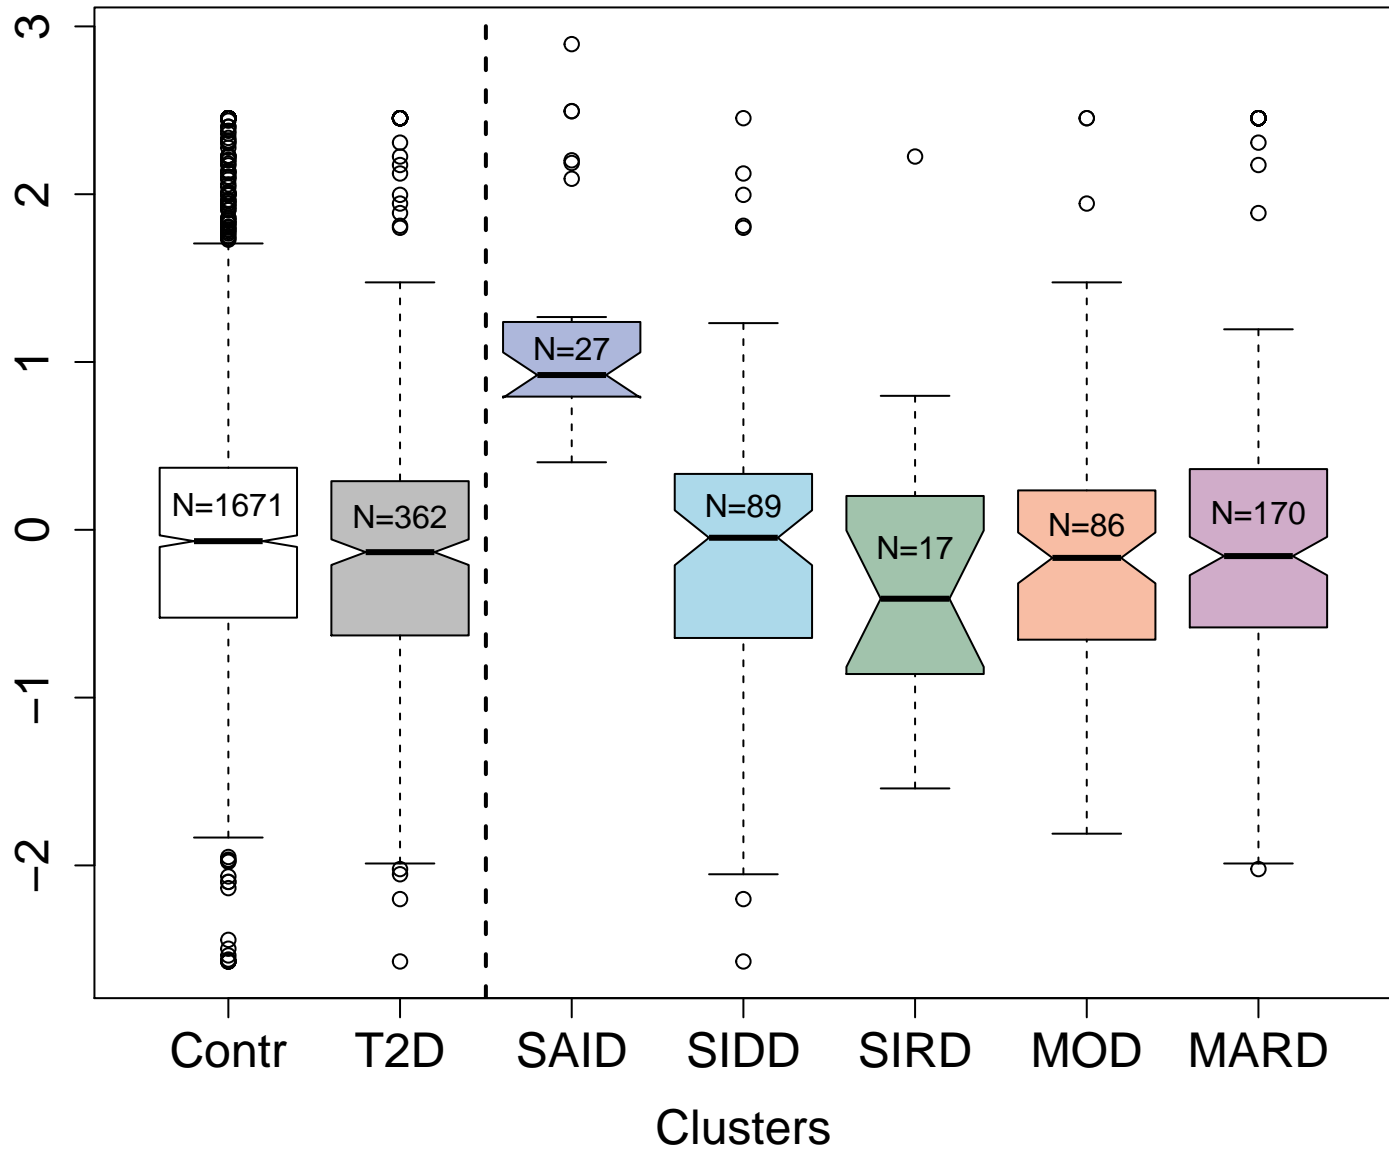



M39378 : tauroursodeoxycholate

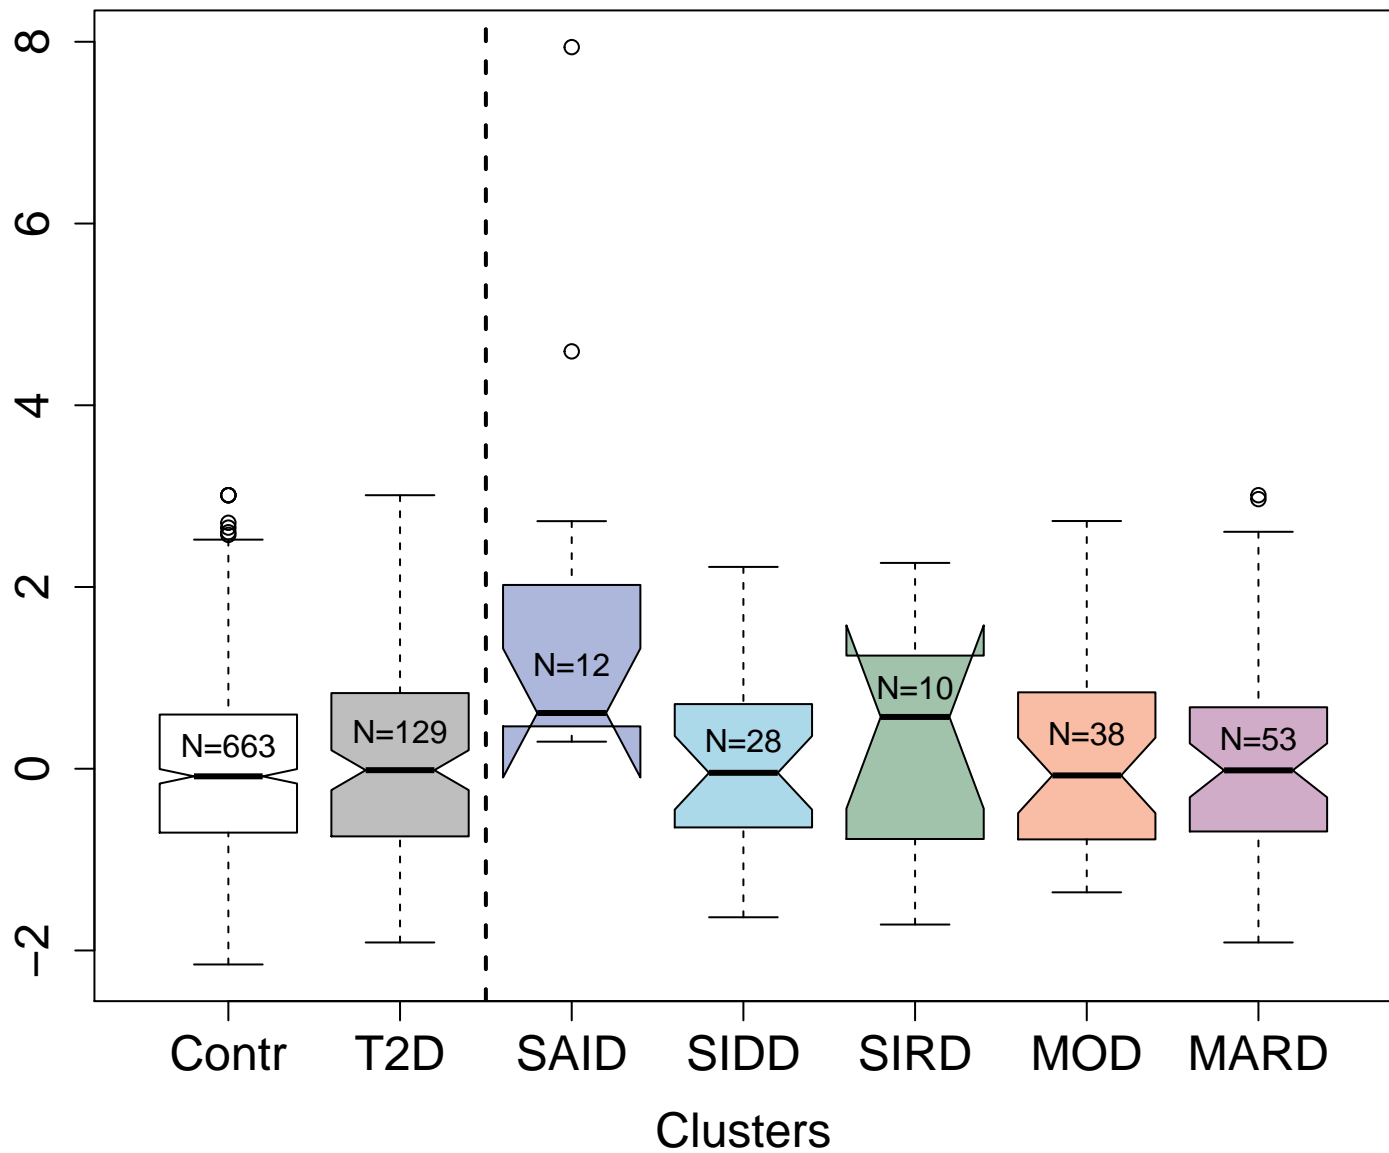

M35675 : 2-hydroxypalmitate

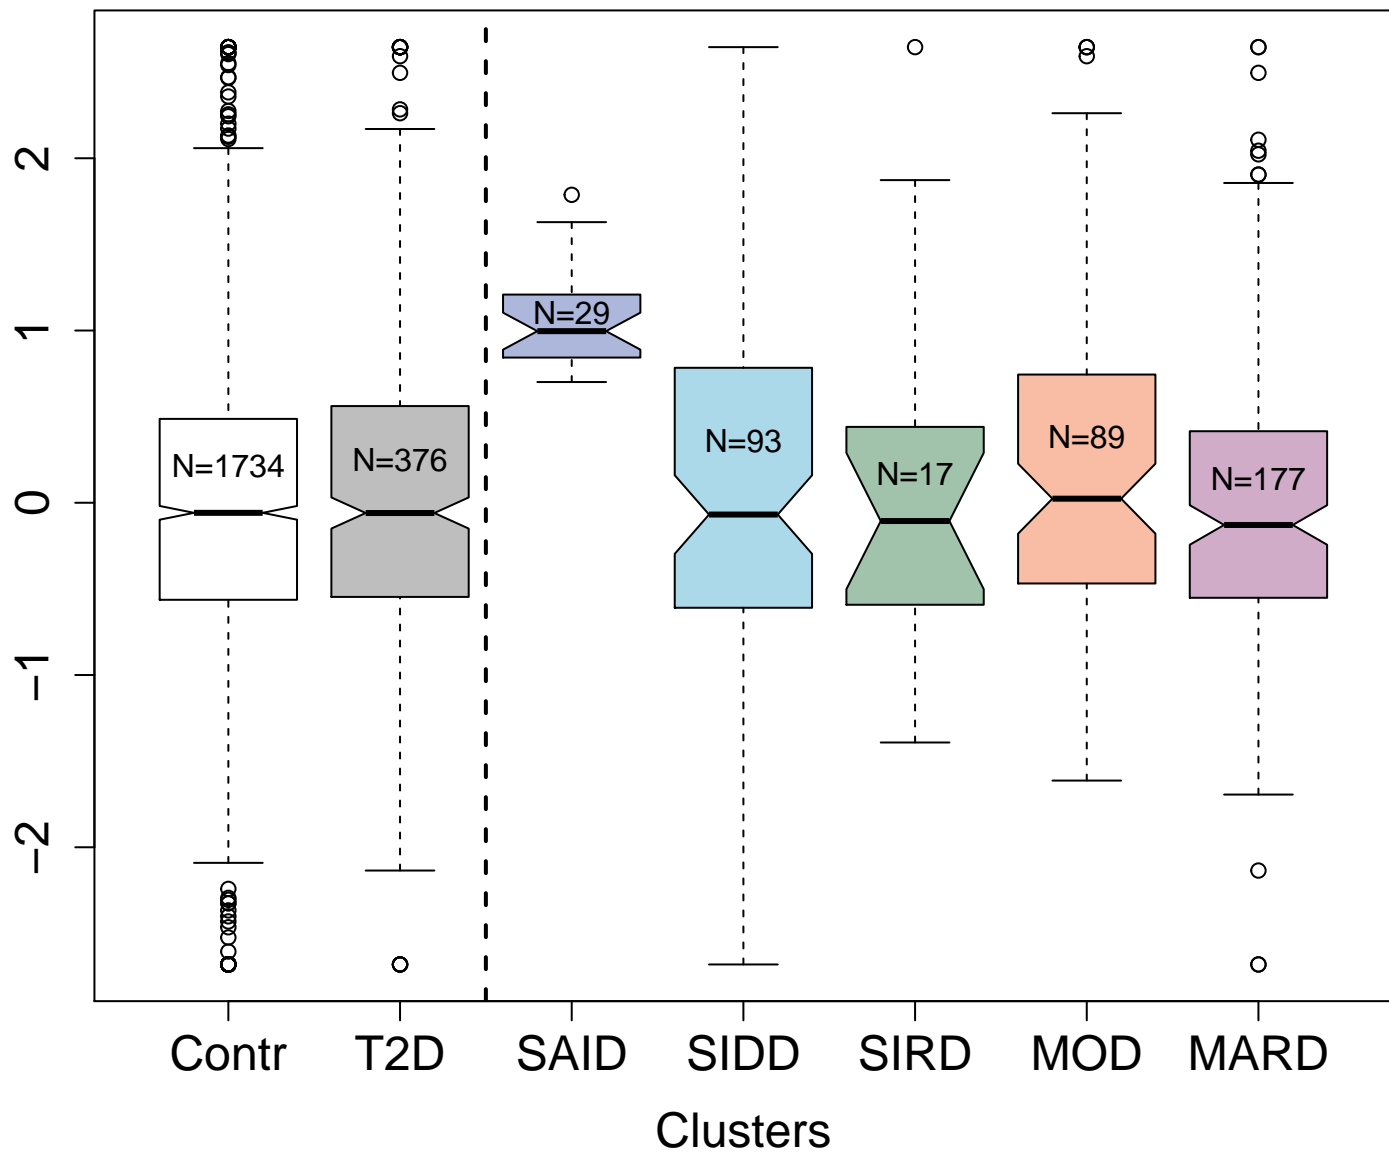

M63072 : 4-ethylcatechol sulfate

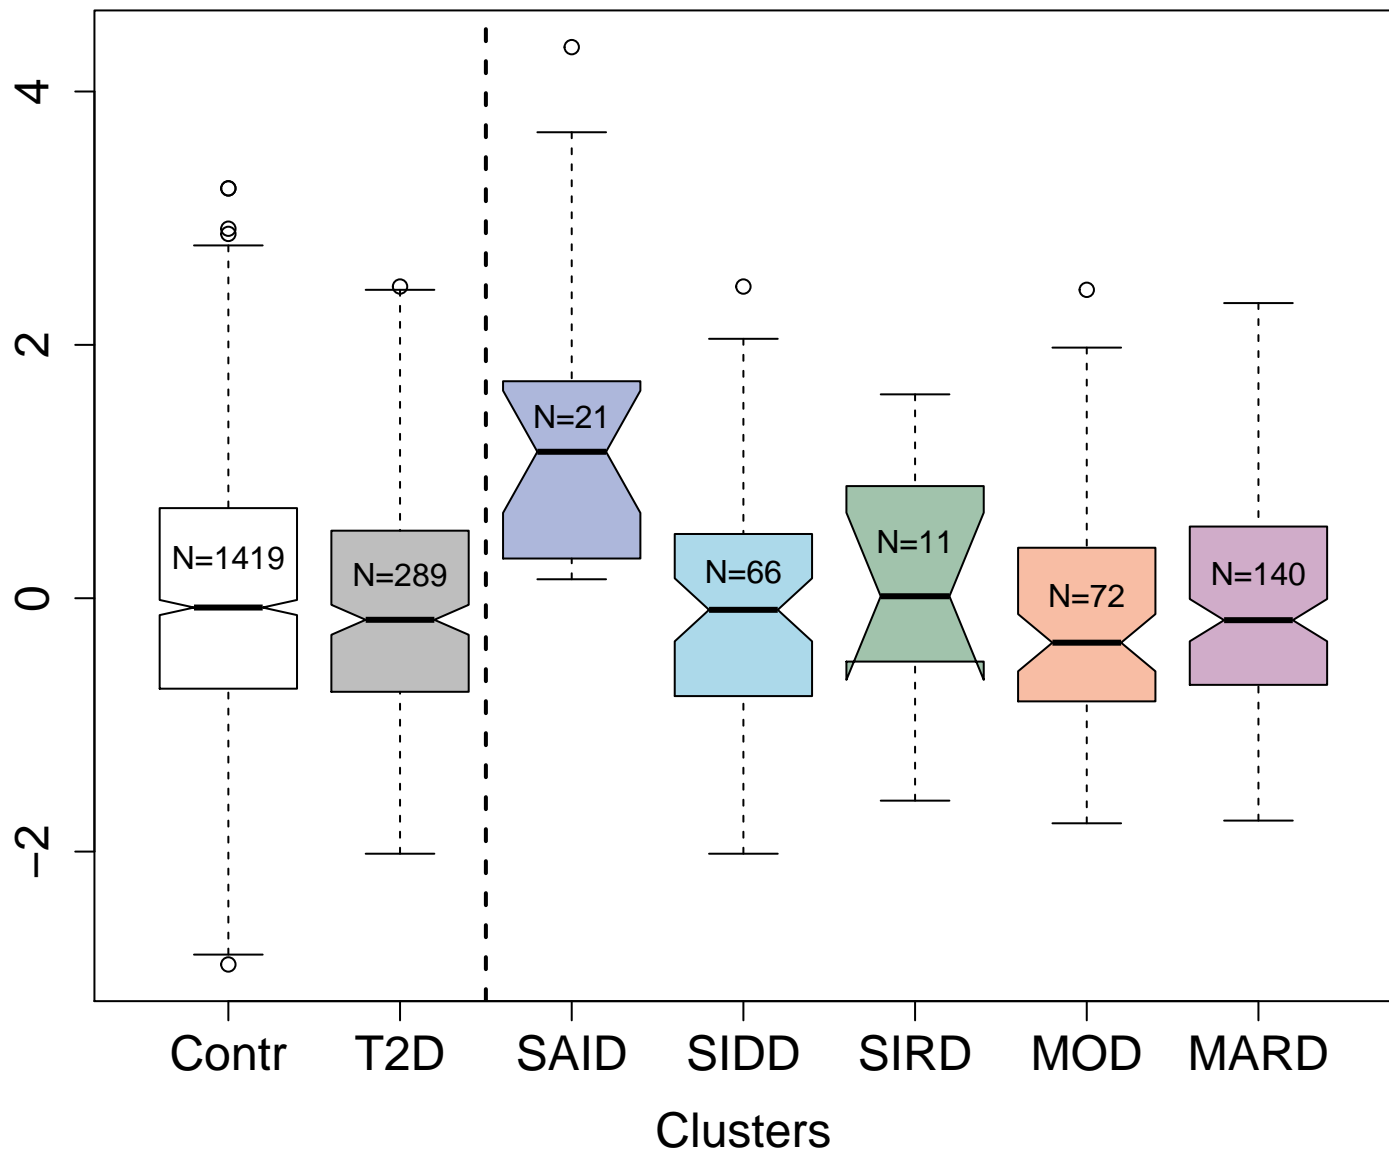

M62857 : dihydroferulic acid sulfate

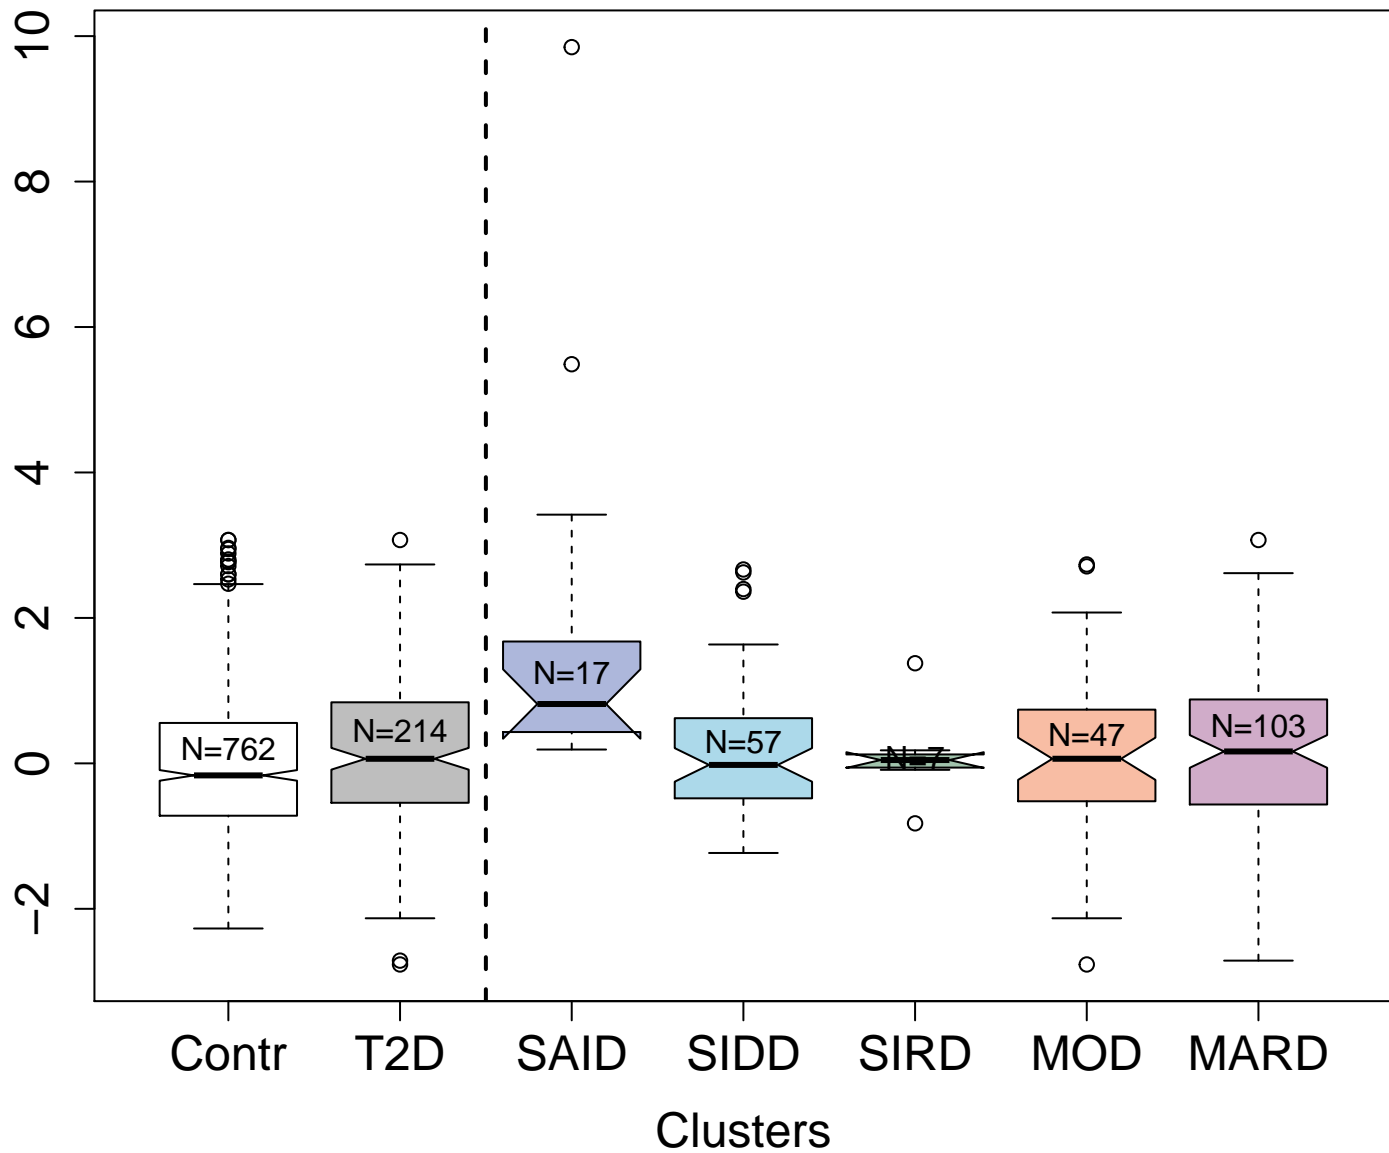

M46972 : X - 21796

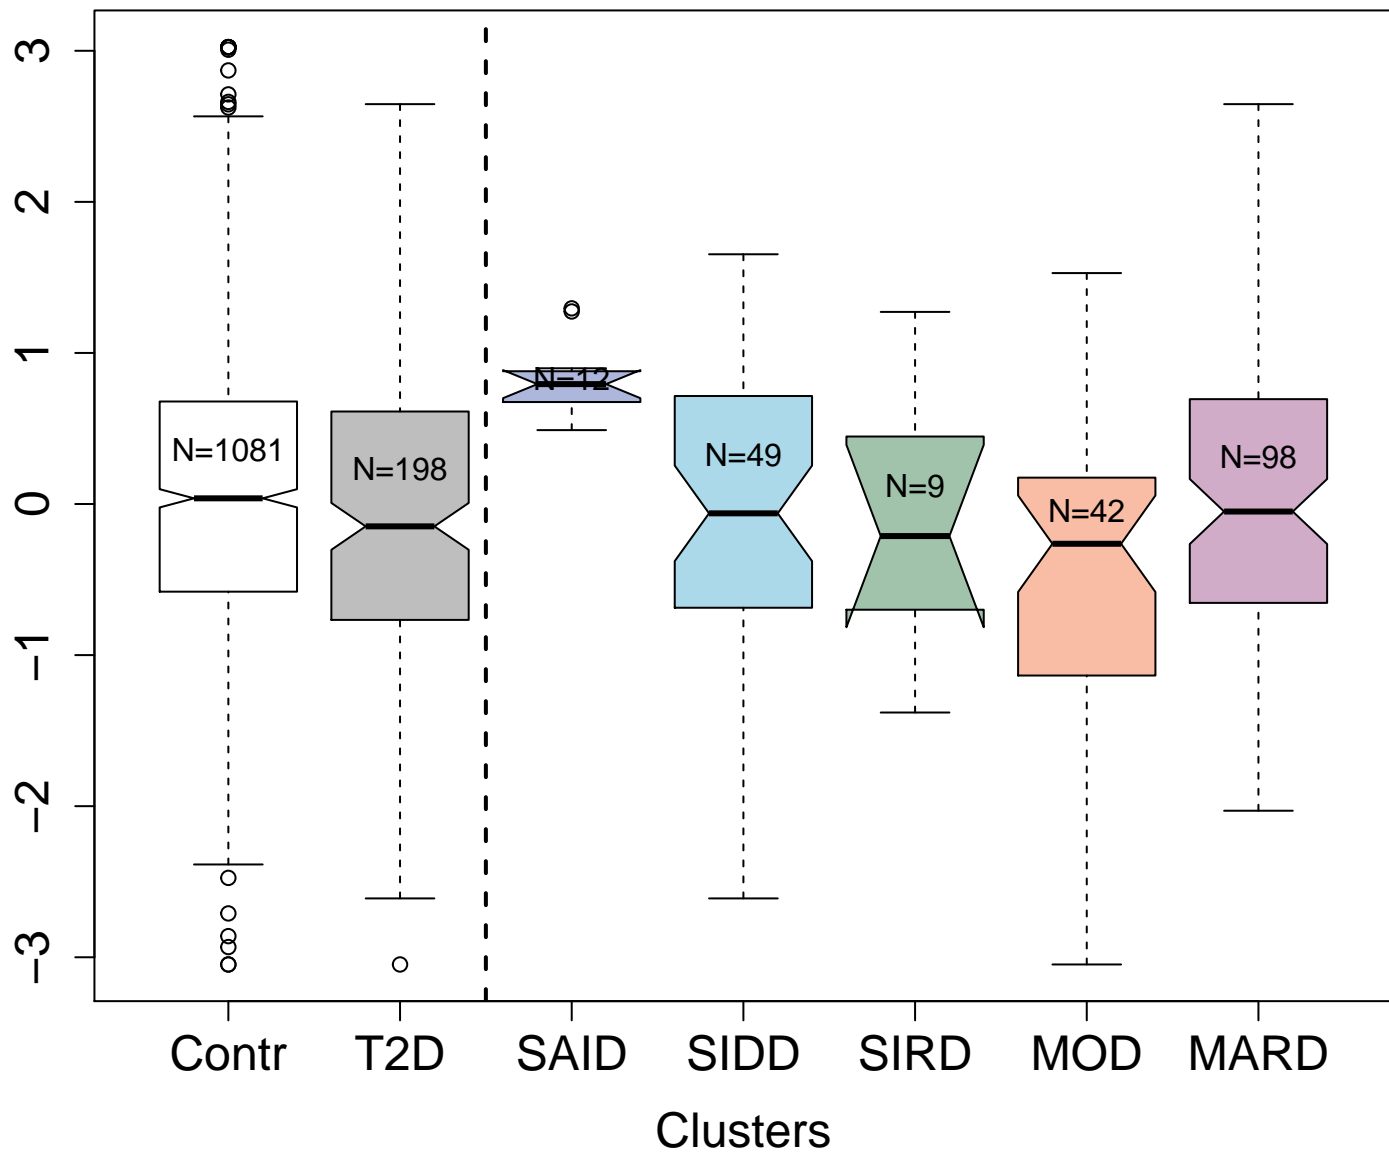

M46115 : 21-hydroxypregnenolone disulfate

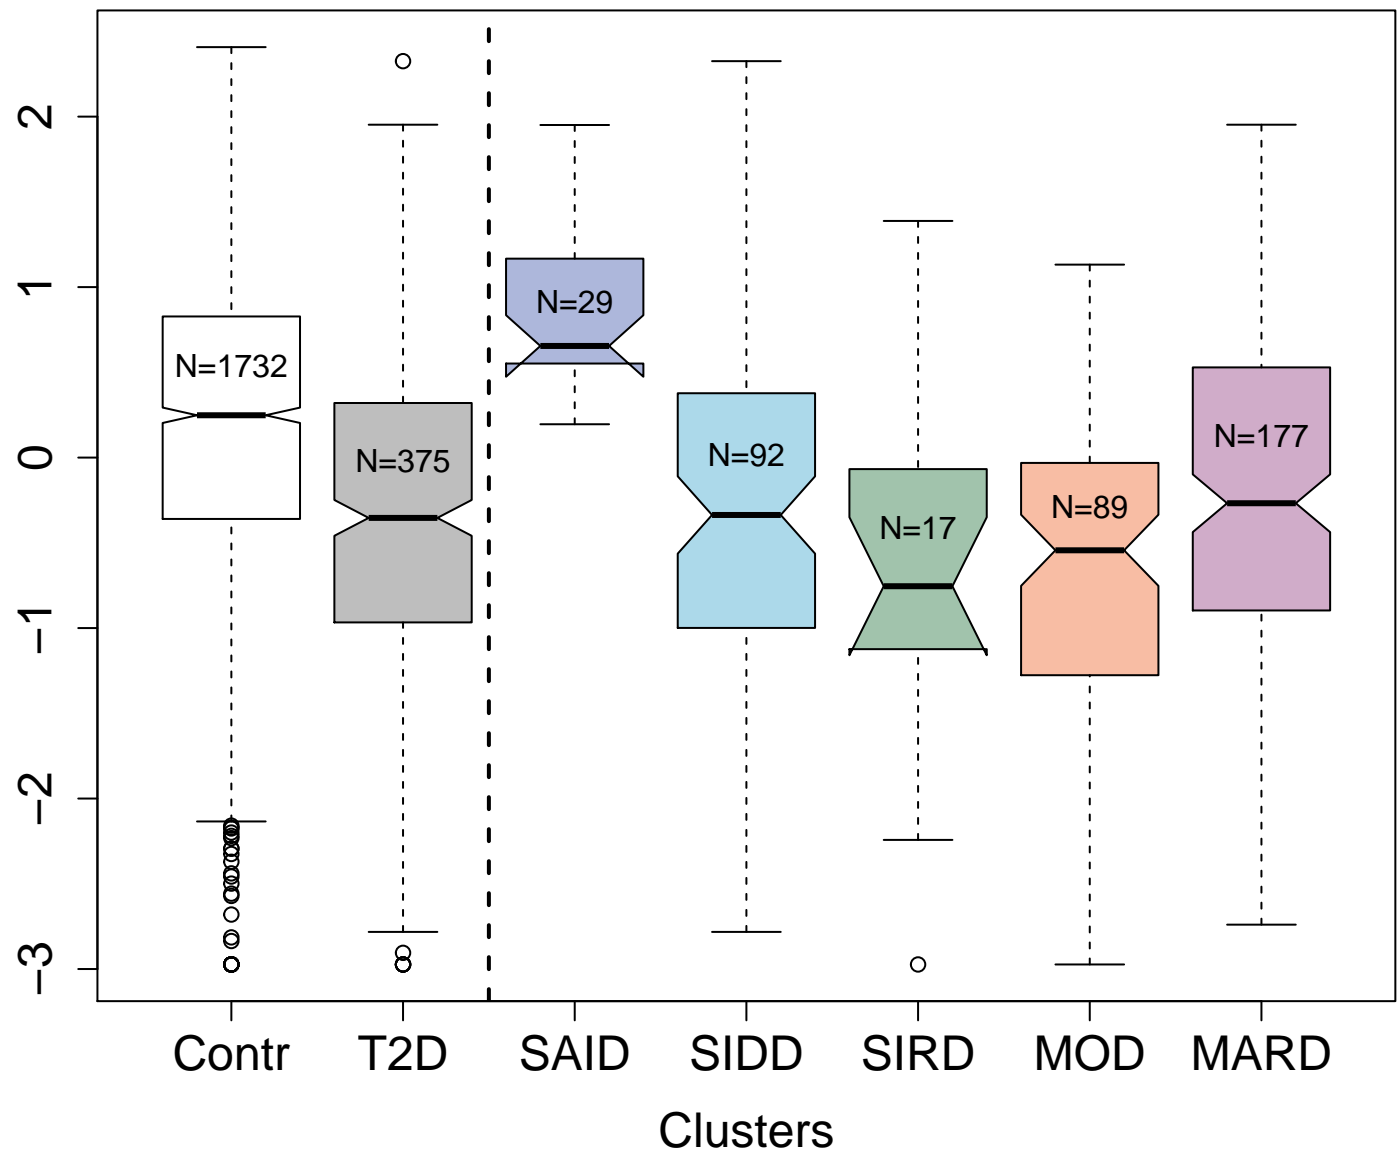

M37459 : ergothioneine

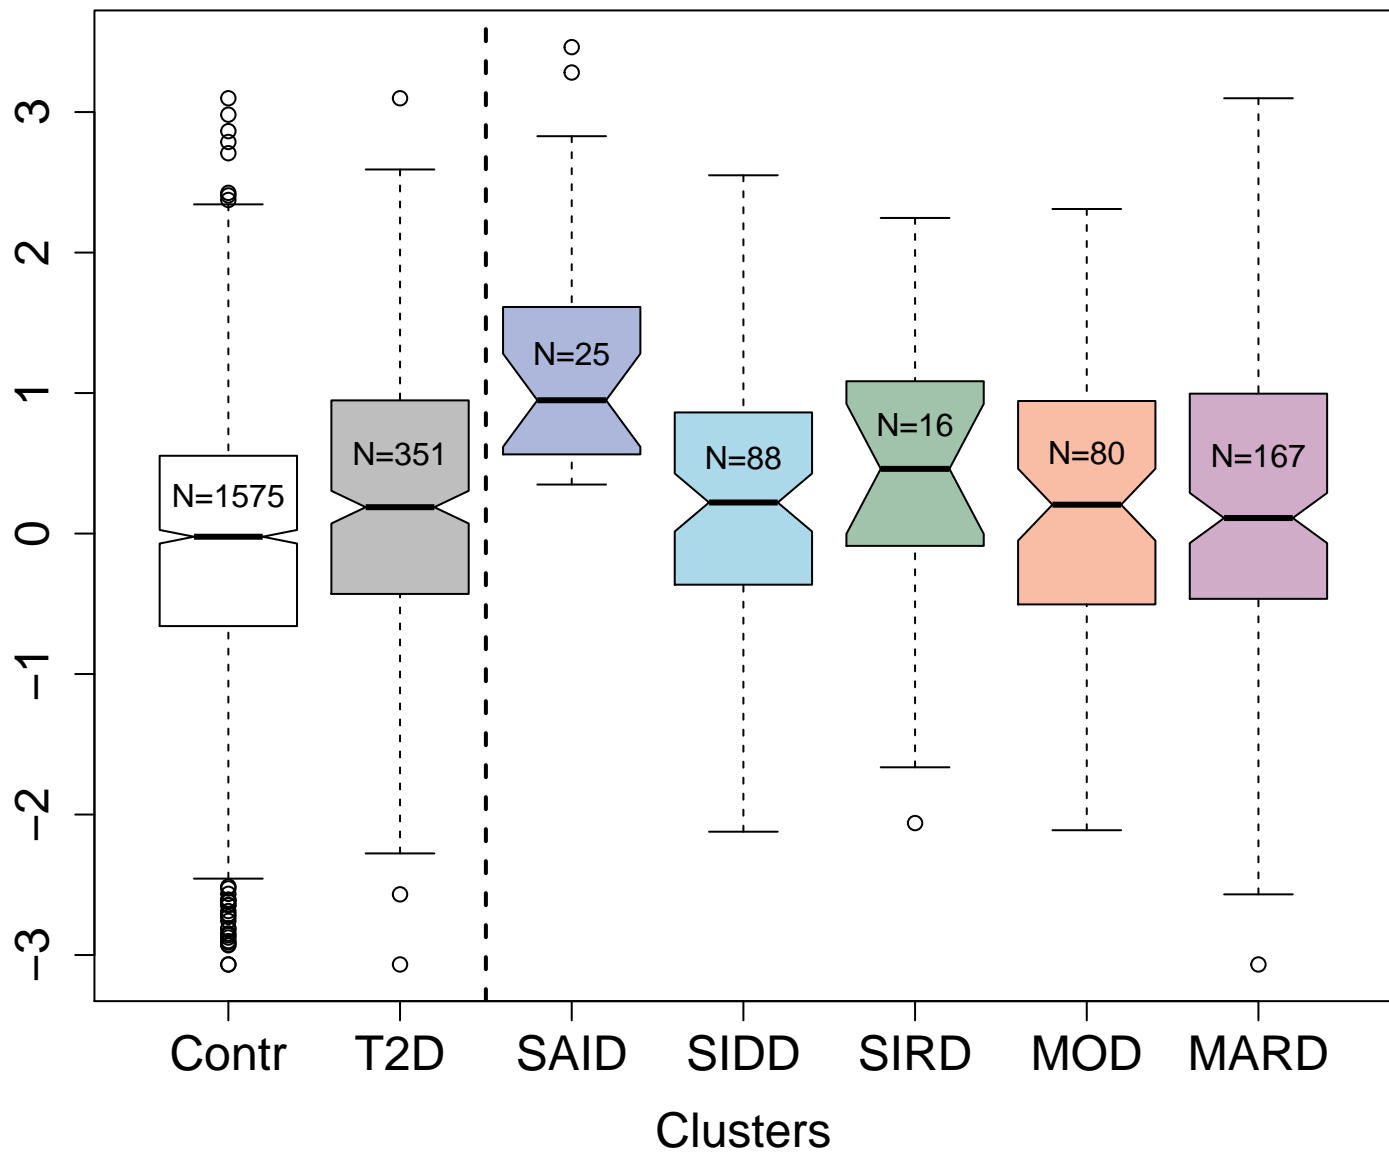

M57782 : norcotine

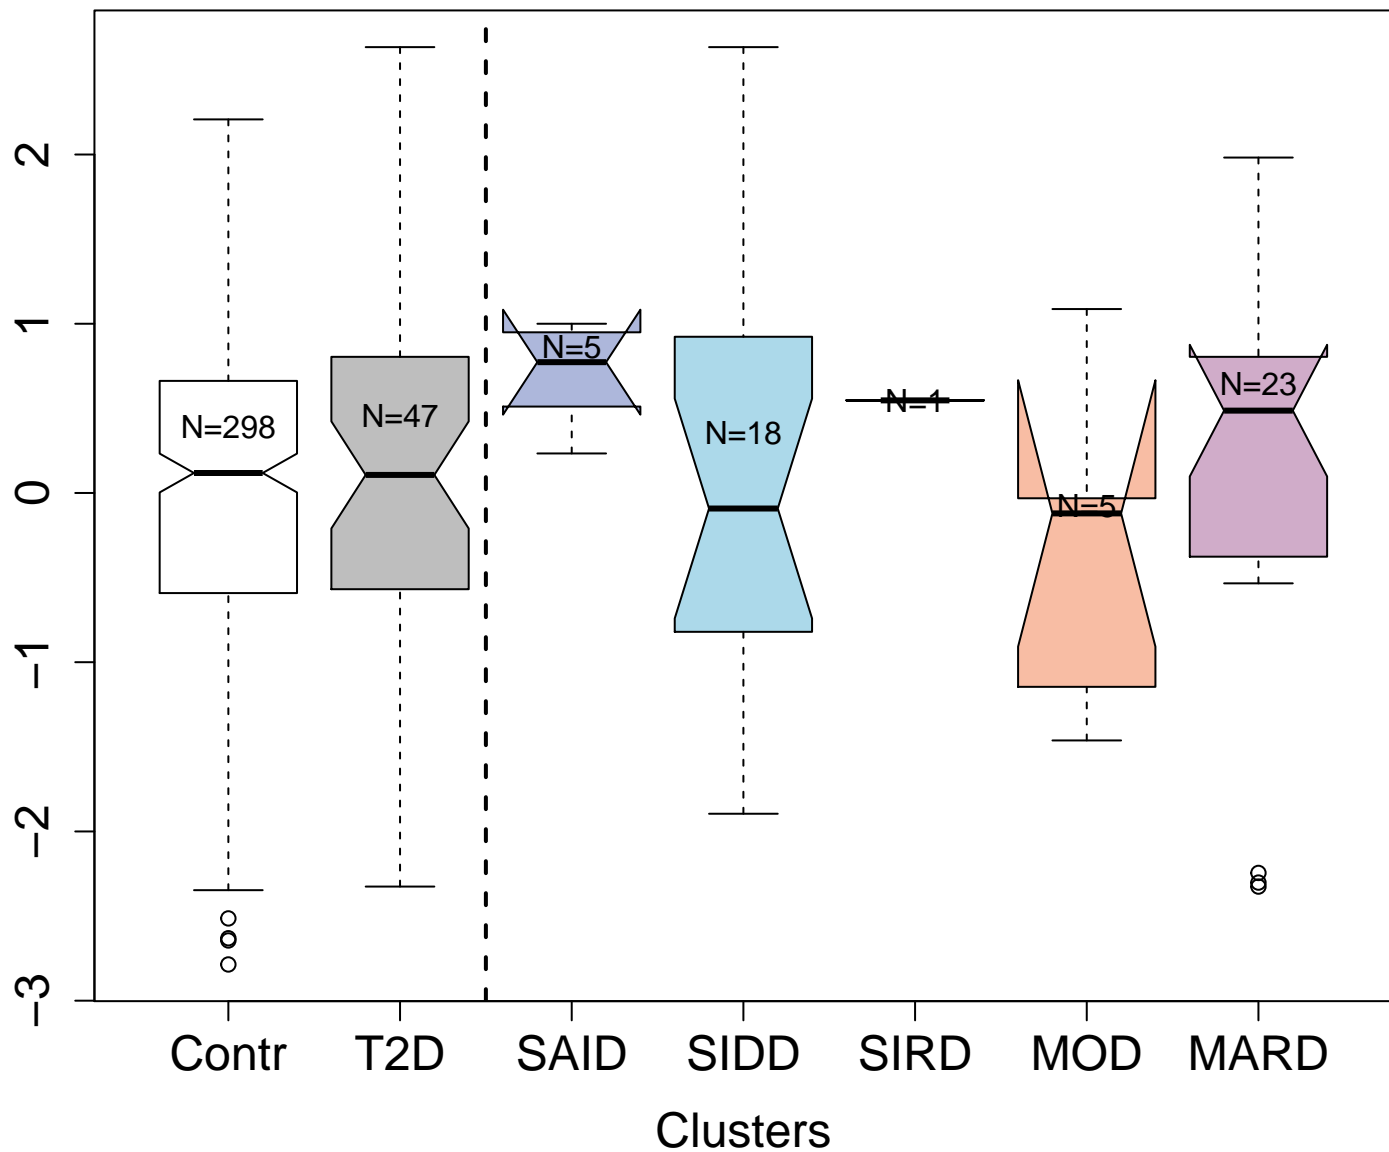



M46657 : X - 14939

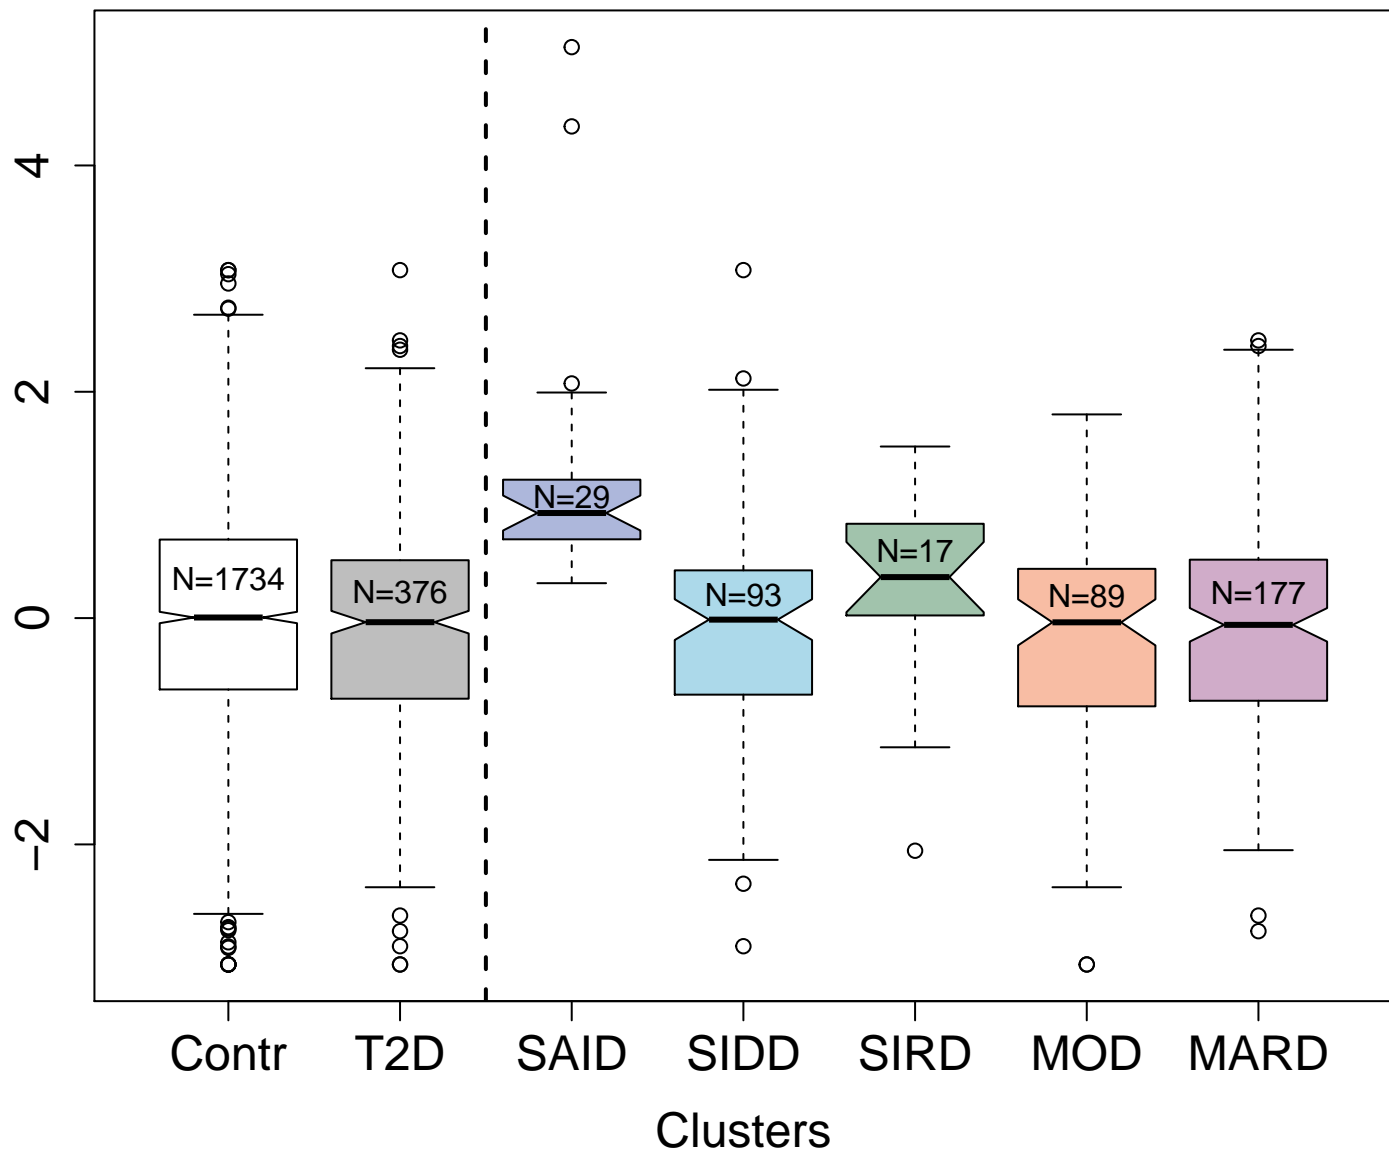

M42450 : 1-stearoyl-2-arachidonoyl-GPC (18:0/20:4)

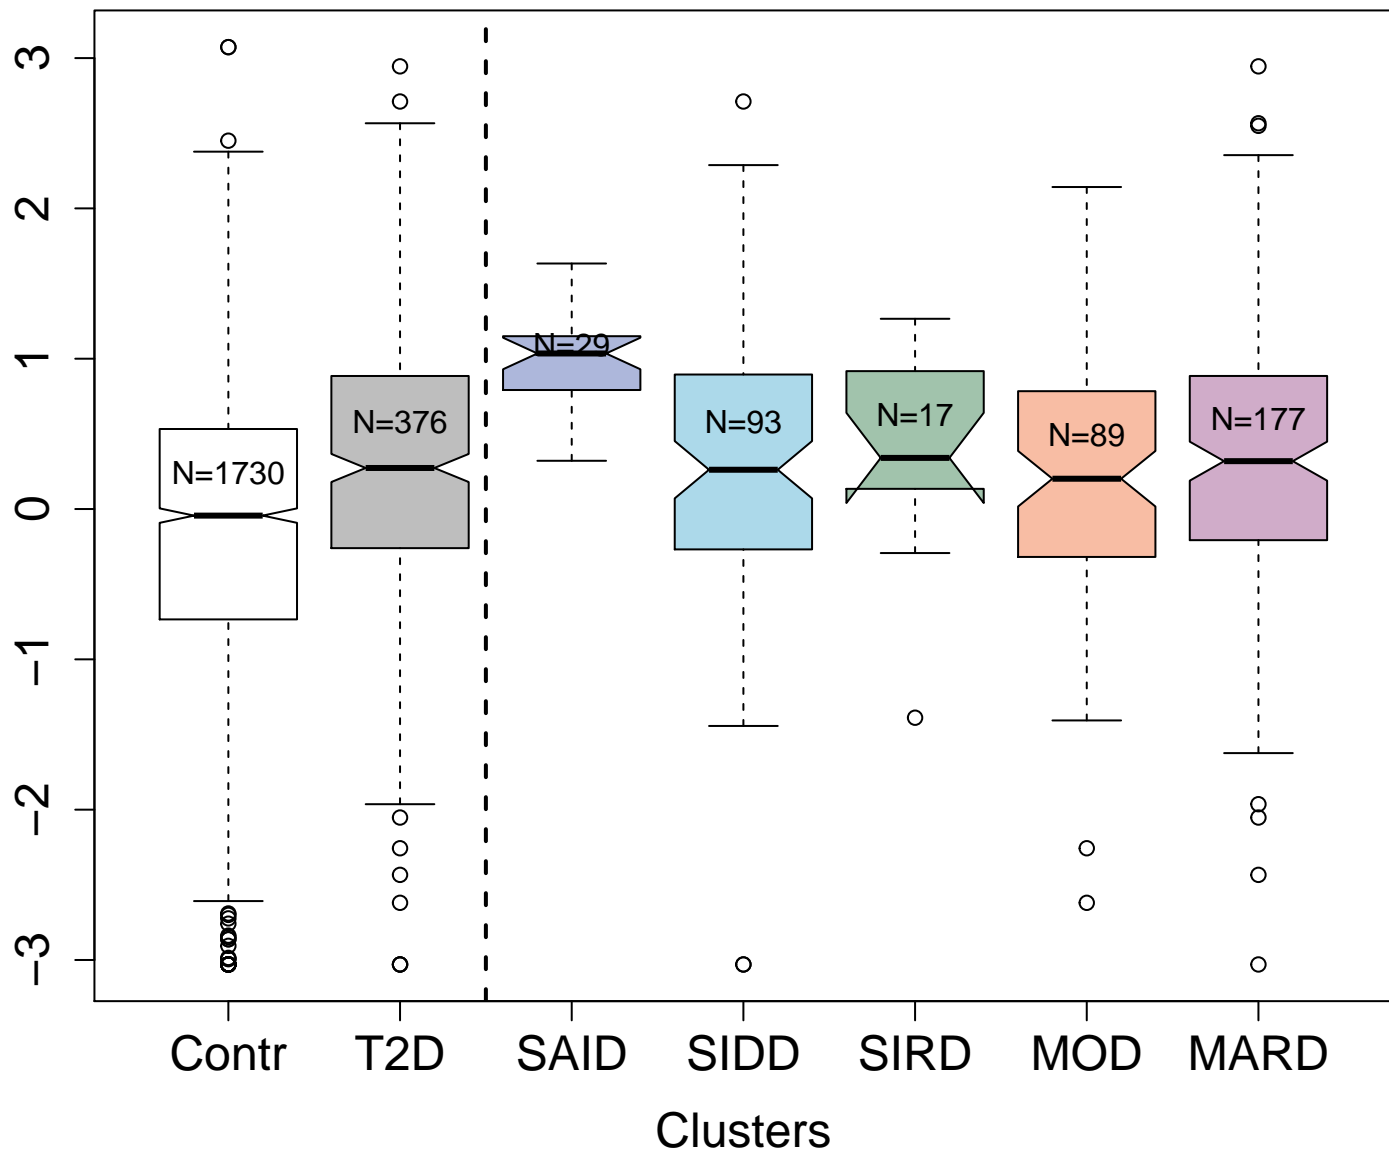

M46146 : 4-methylcatechol sulfate

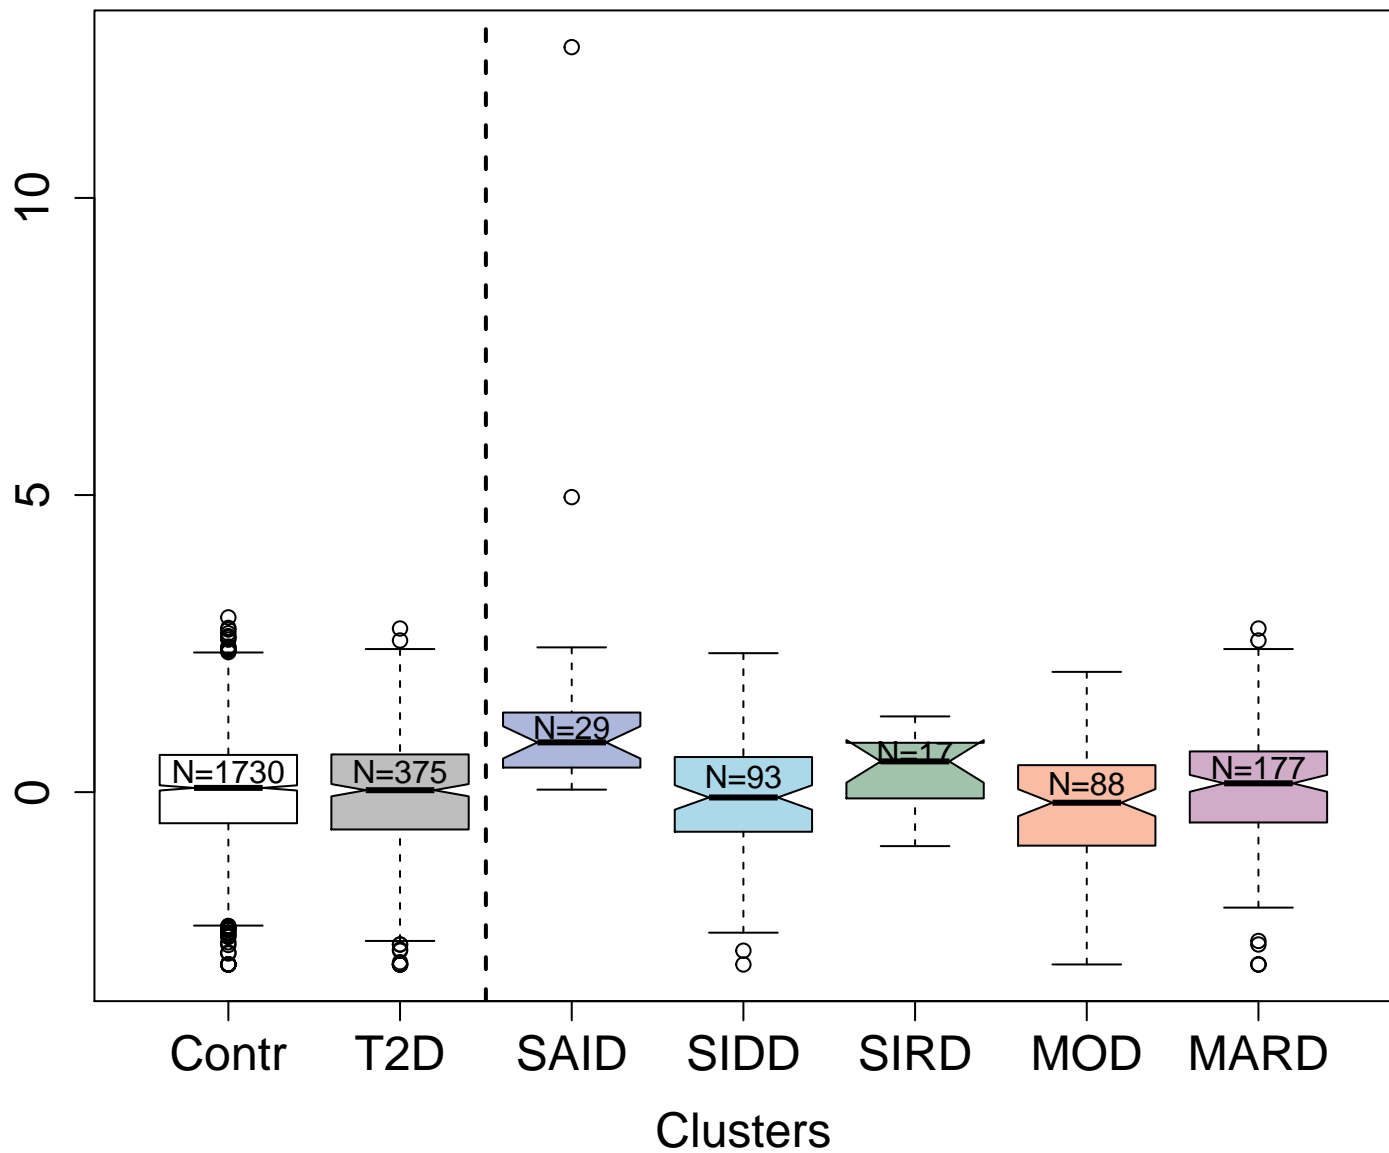

M46681: X - 16935

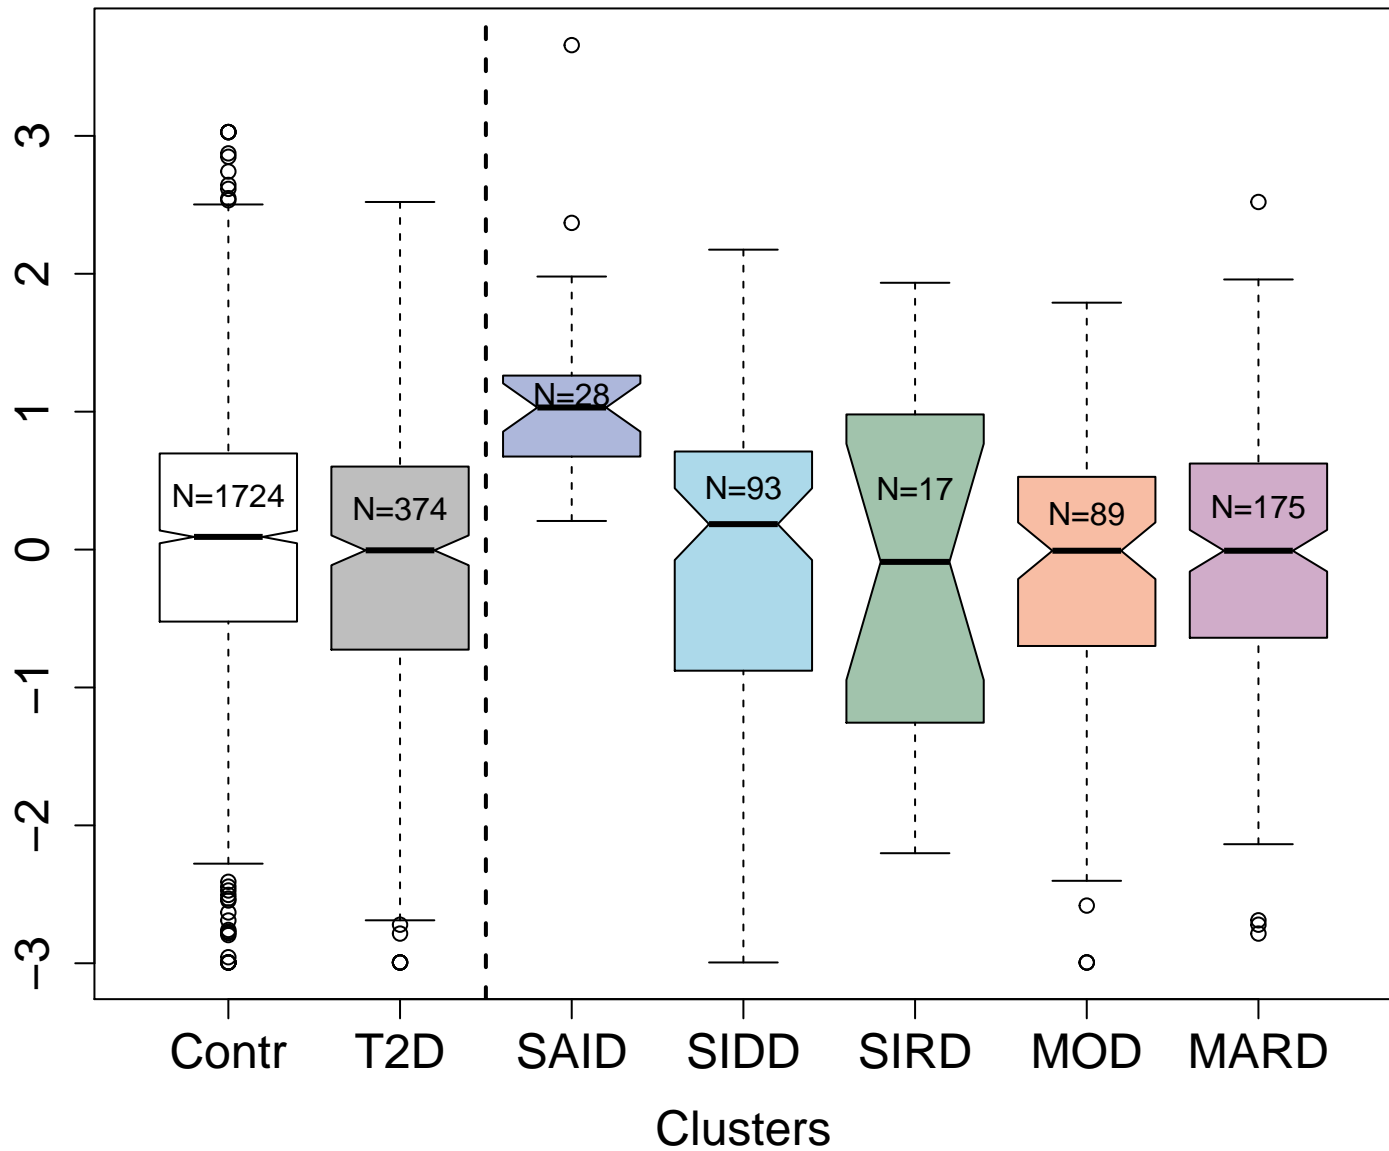

M48442 : 4-vinylguaiacol sulfate

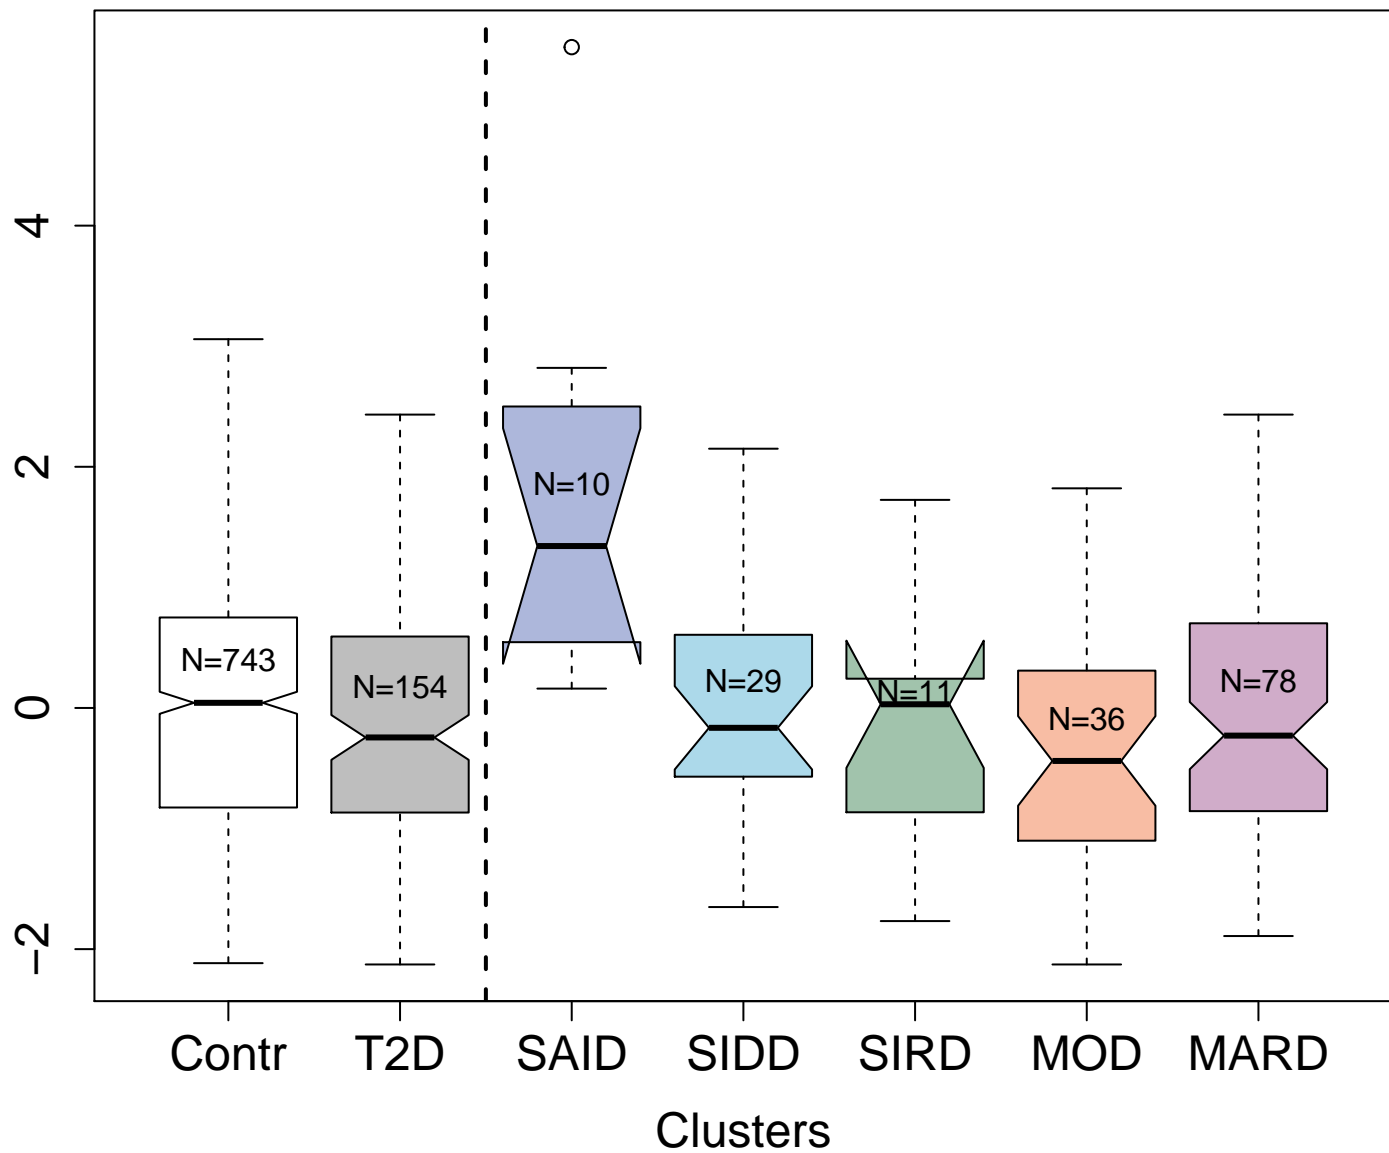

M36803 : 3beta,7alpha-dihydroxy-5-cholestenoate

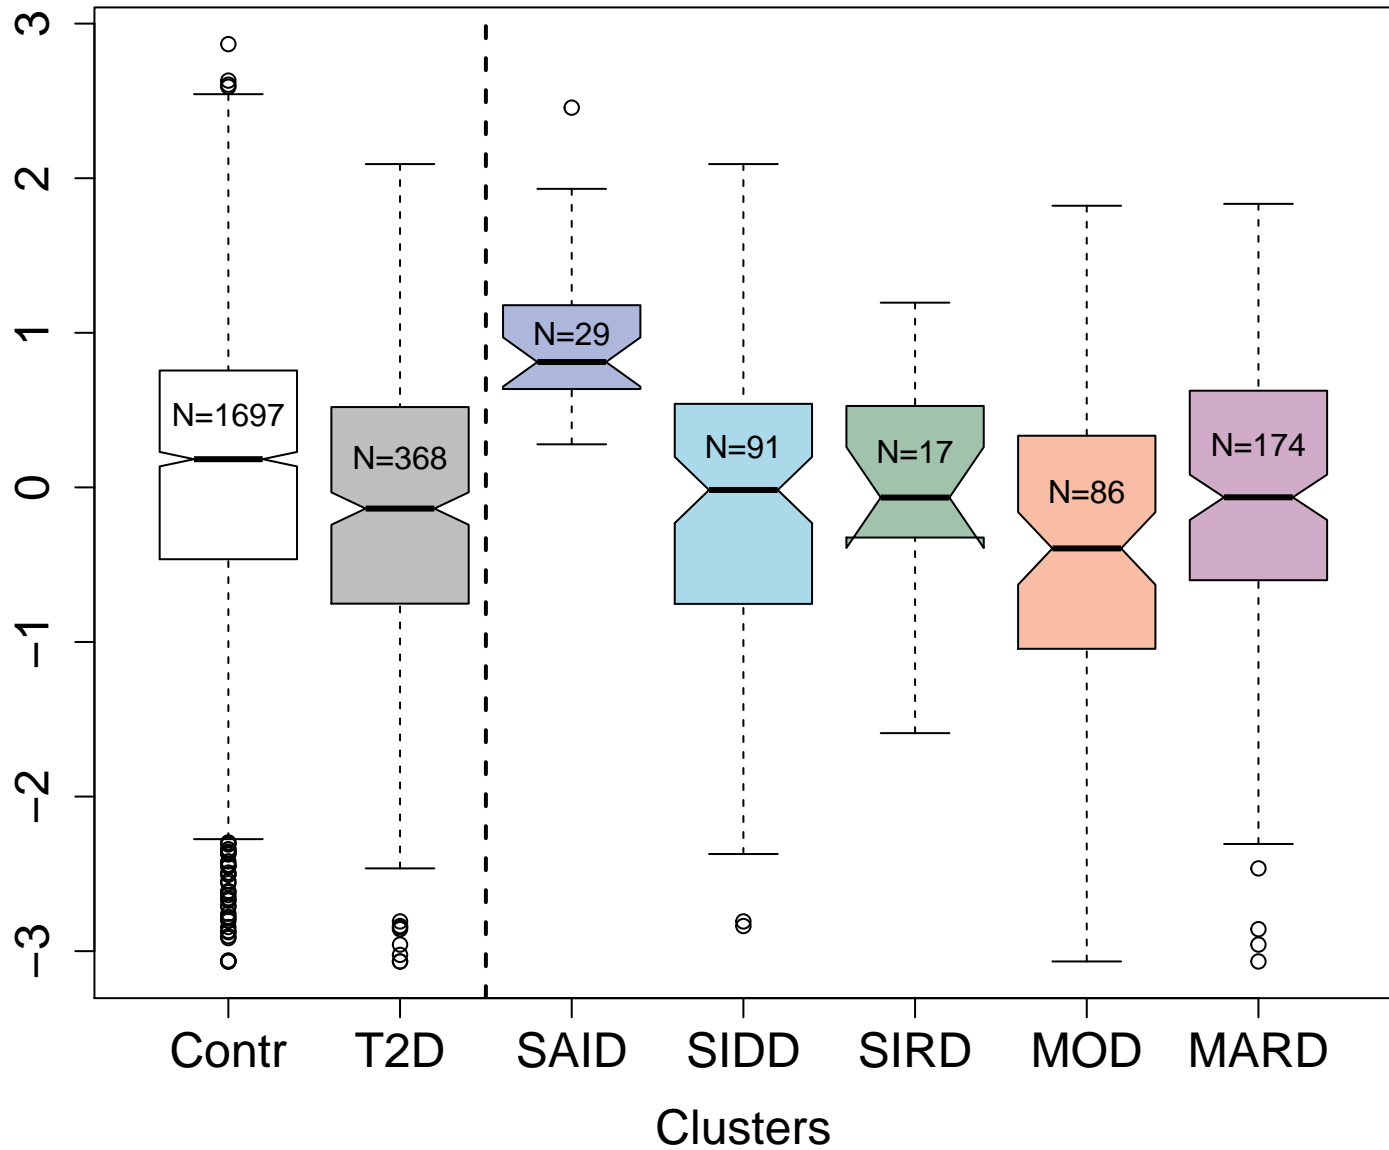

M49463 : X - 23587

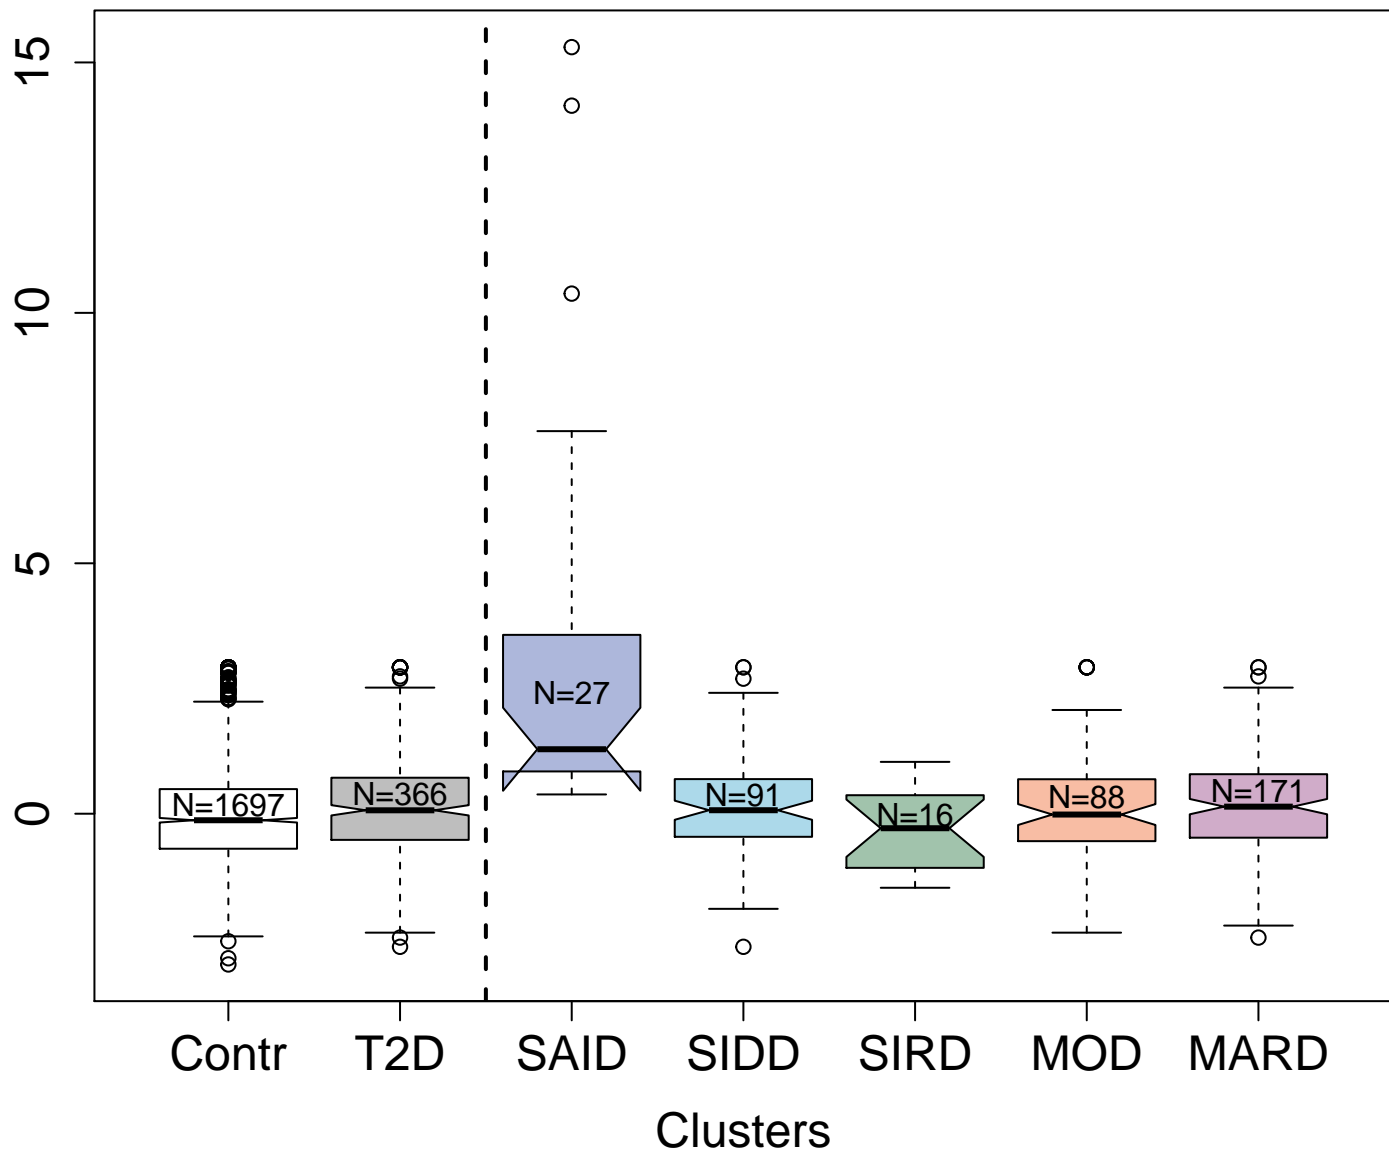

M52452 : 1-stearoyl-2-linoleoyl-GPC (18:0/18:2)\*

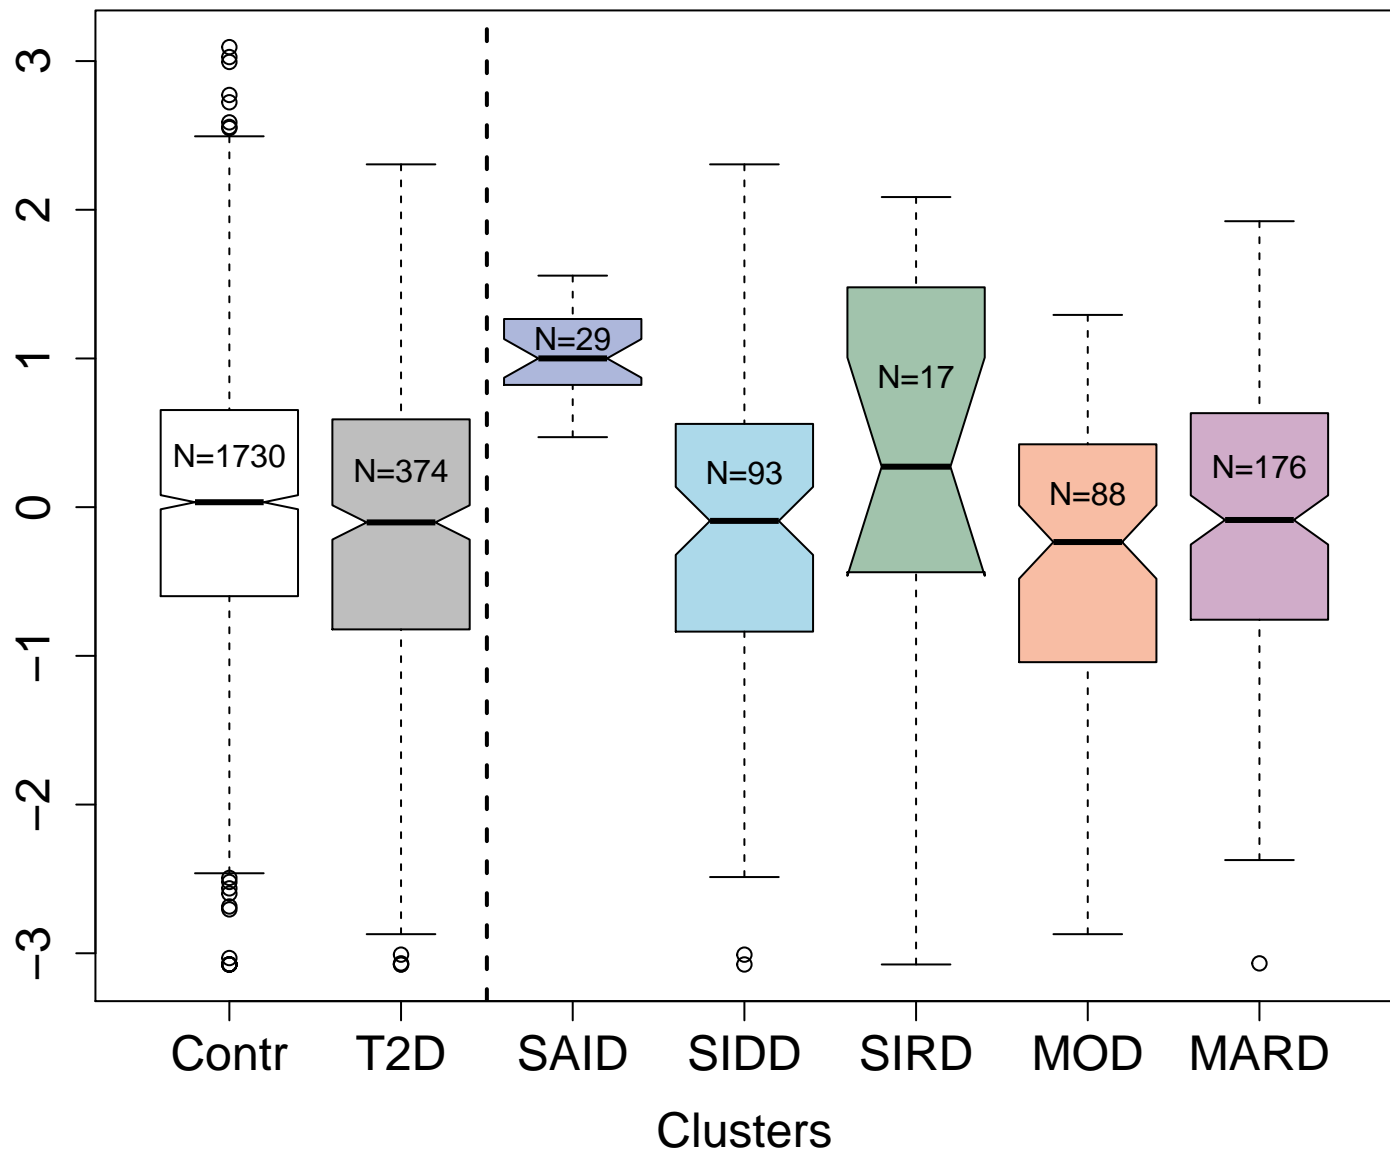



M40605 : butyrate/isobutyrate (4:0)

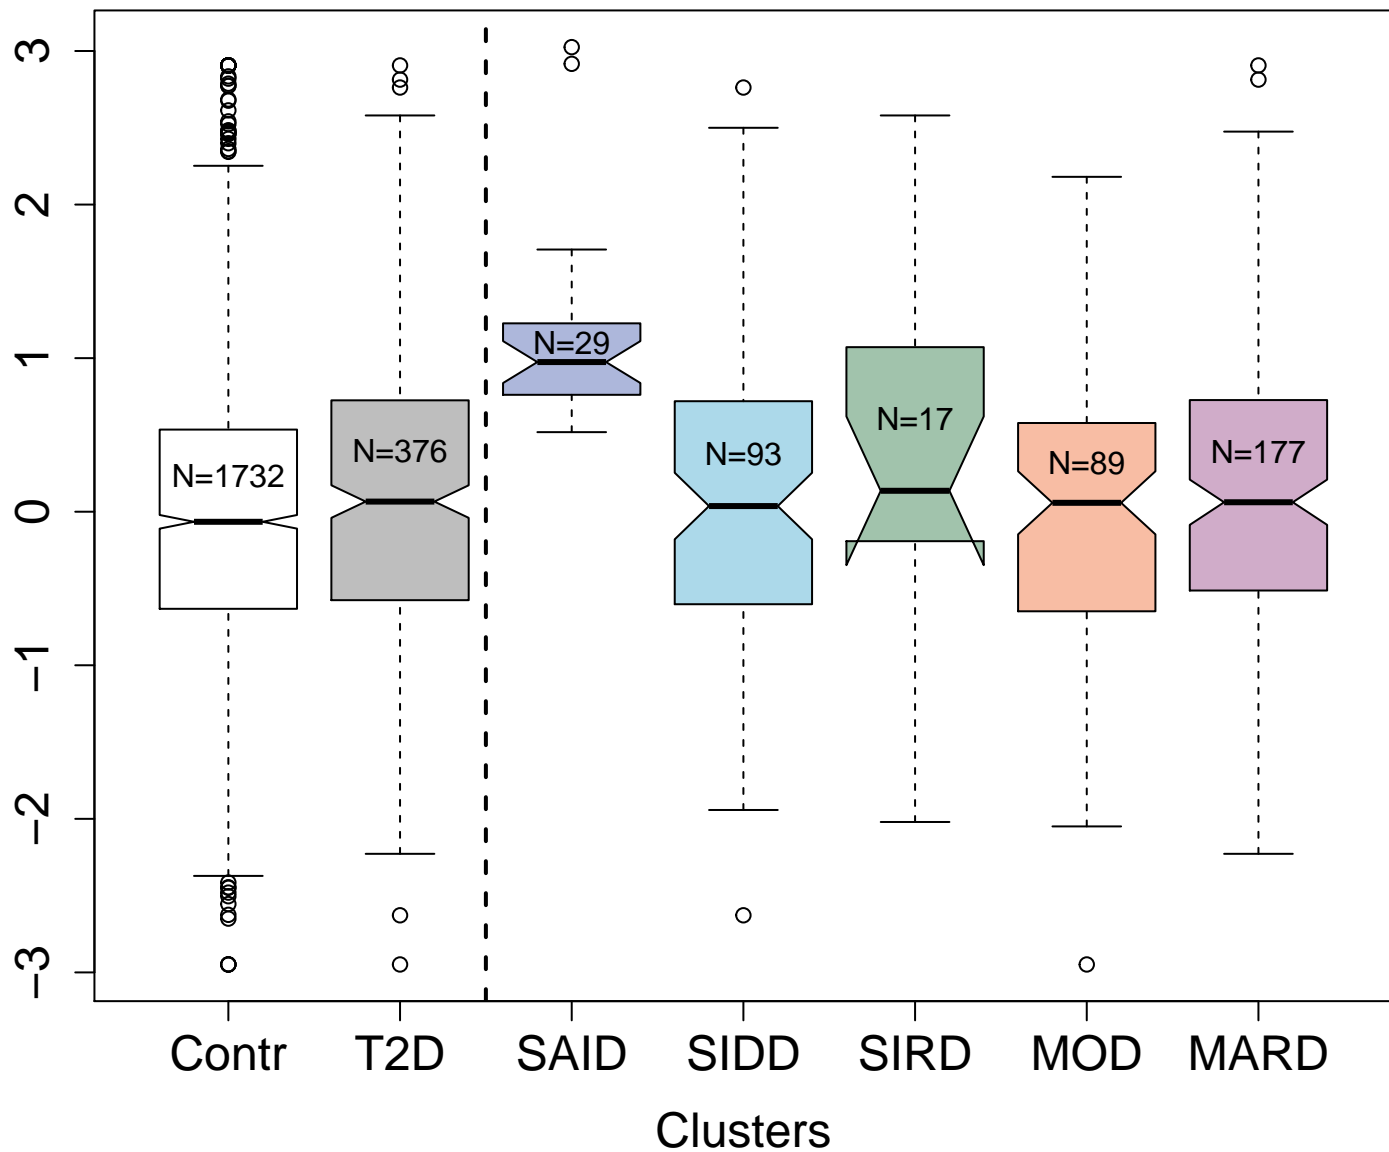

M37187 : 5alpha-androstan-3beta,17alpha-diol disulfate

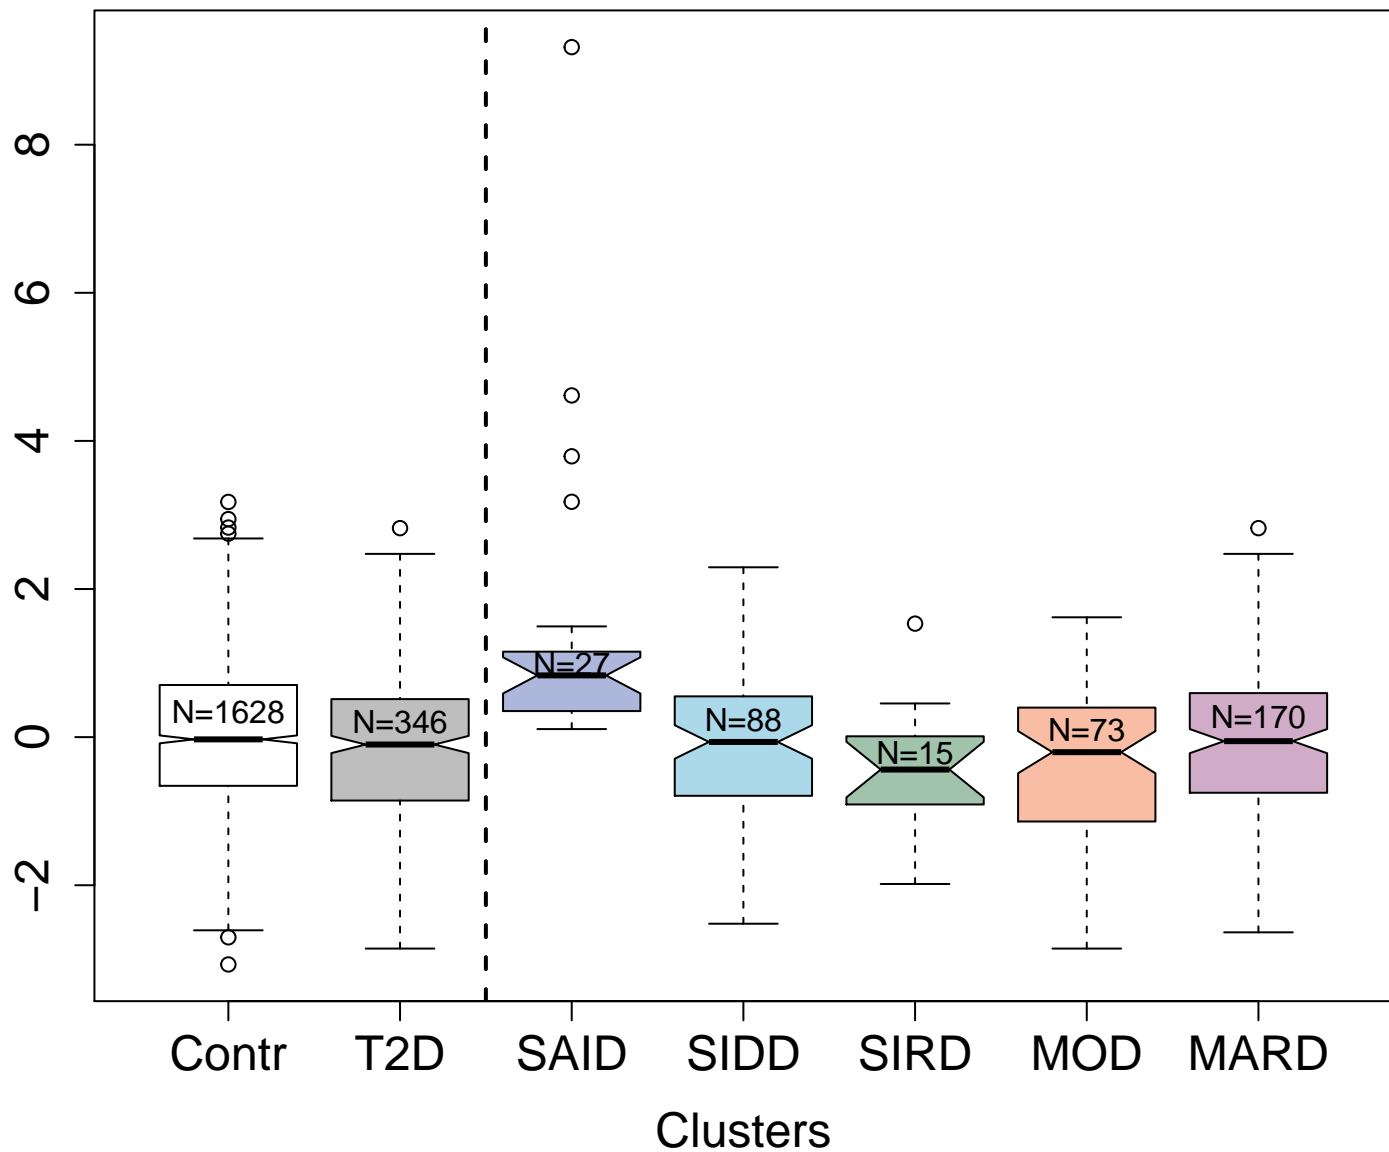

M18477 : glycodeoxycholate

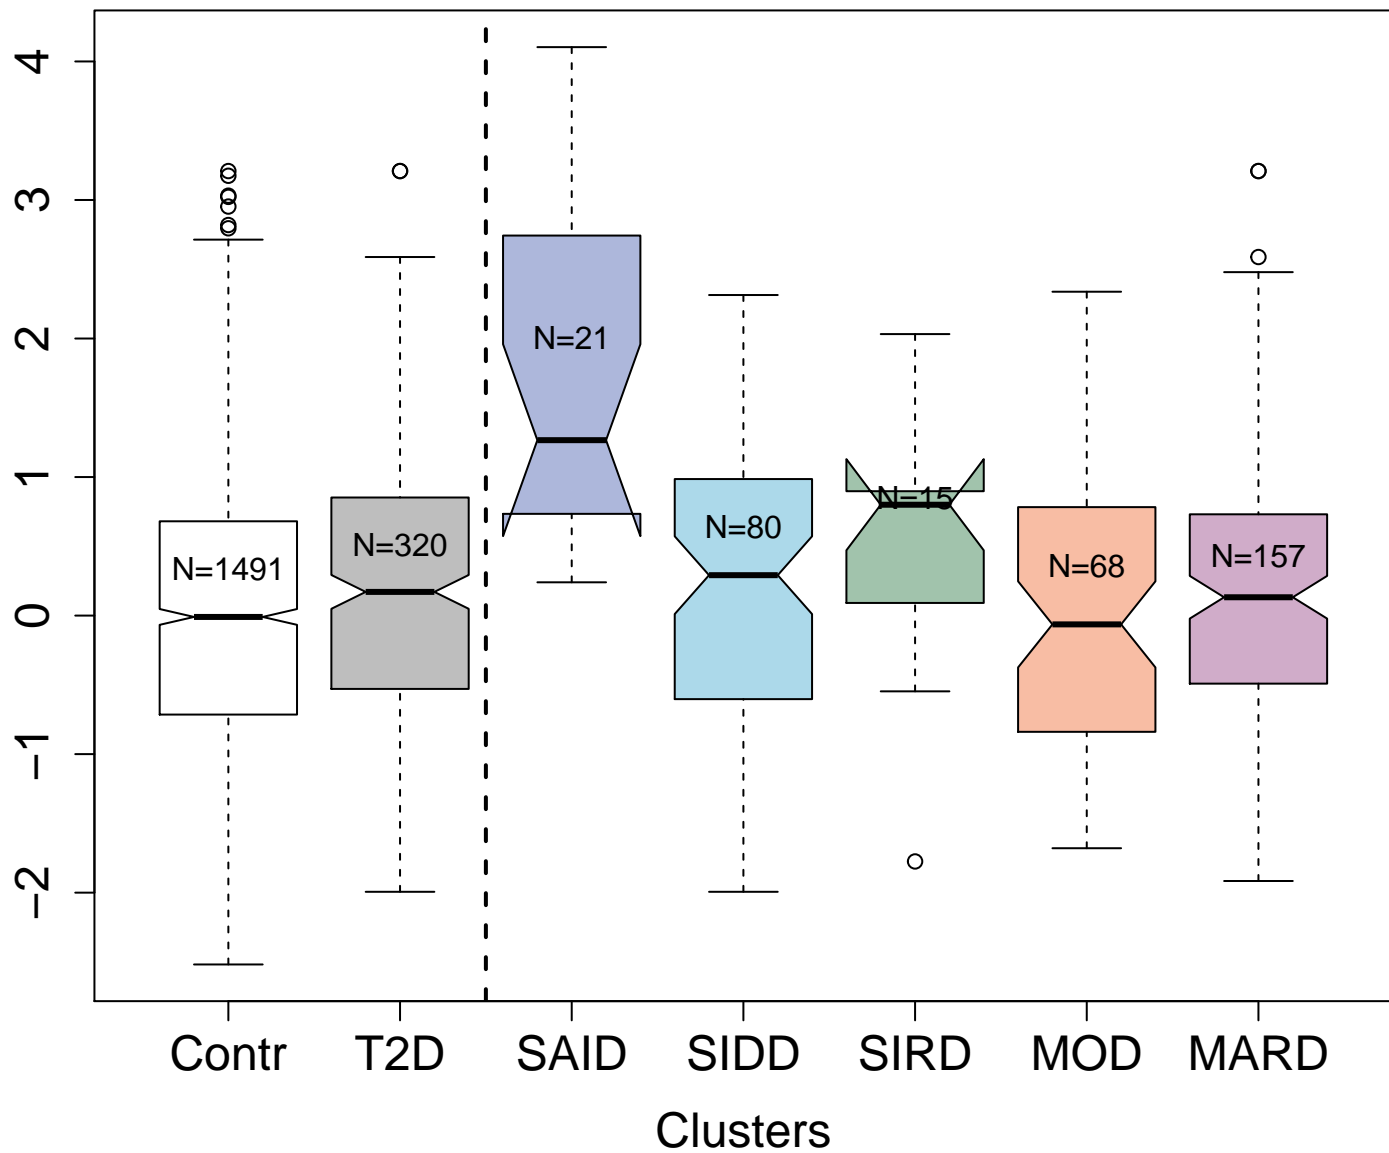

M62566 : 1-carboxyethylphenylalanine

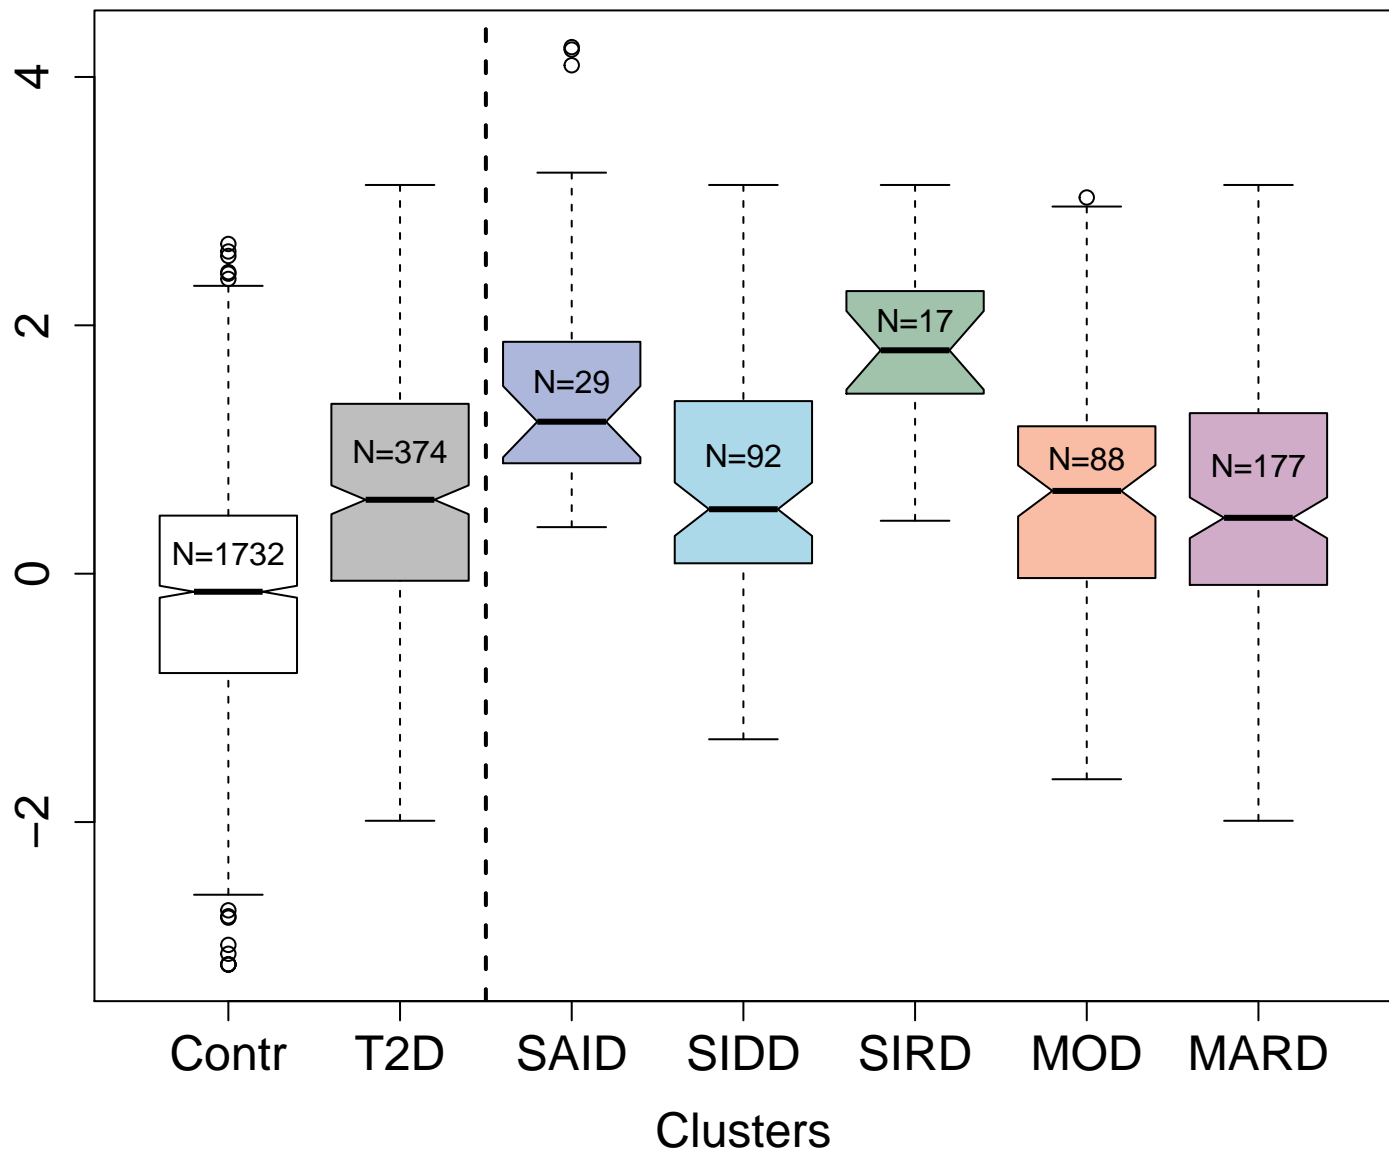

M52501 : X - 24306

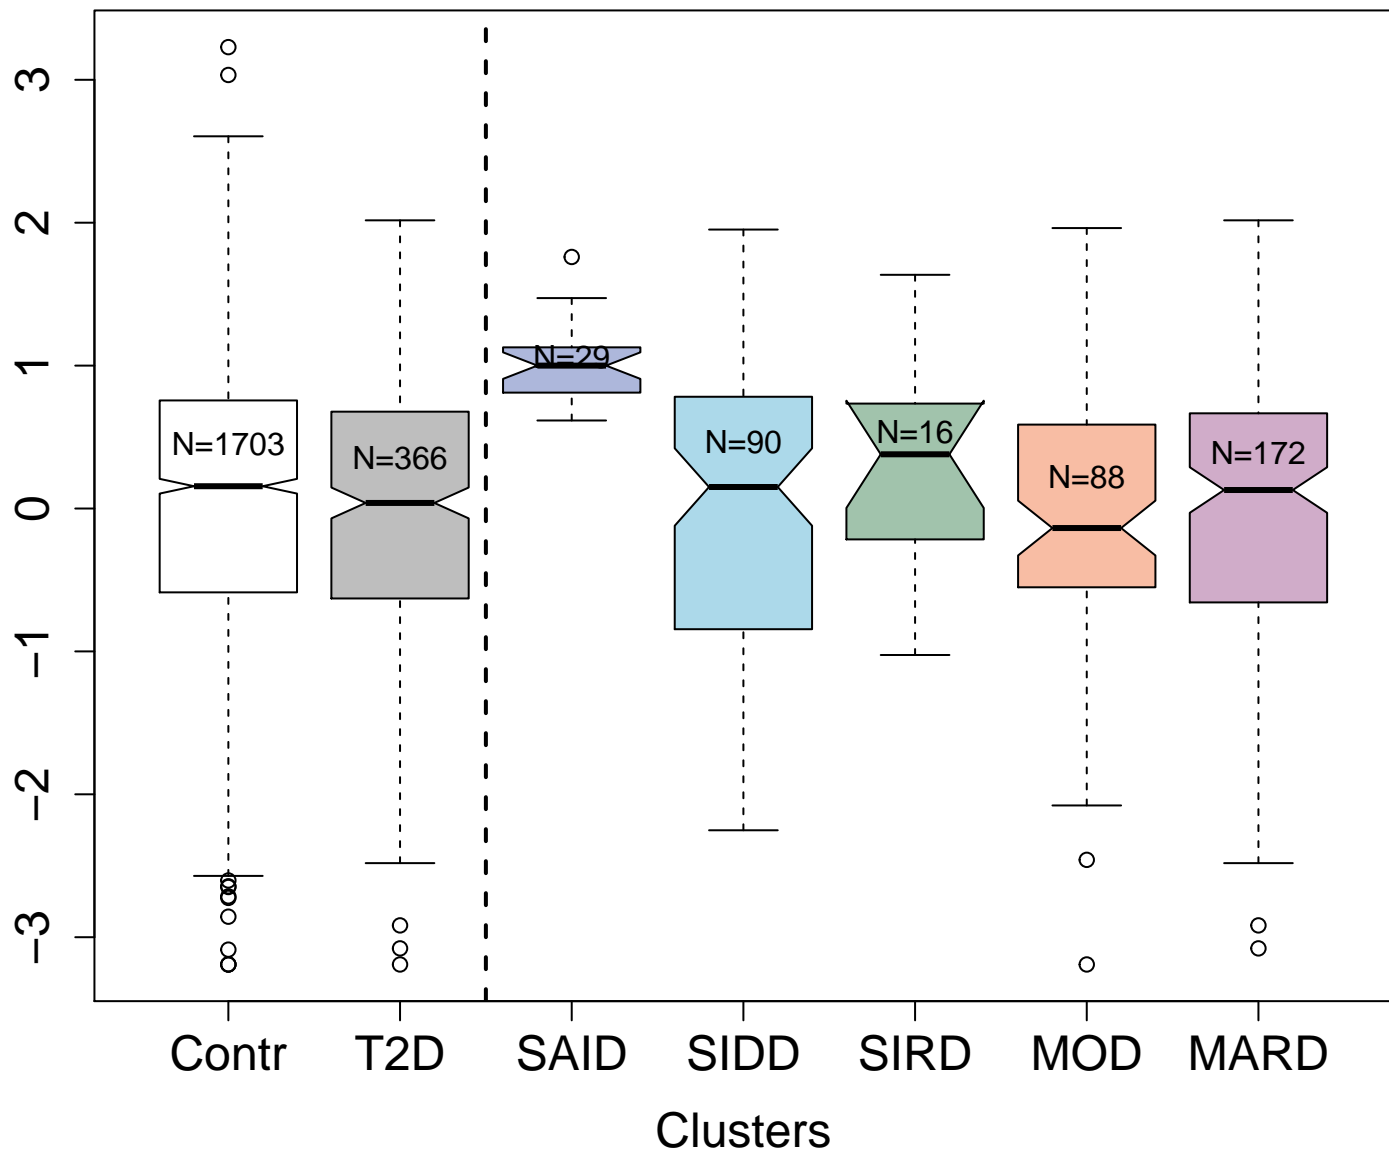

M32391 : 1,3-dimethylurate

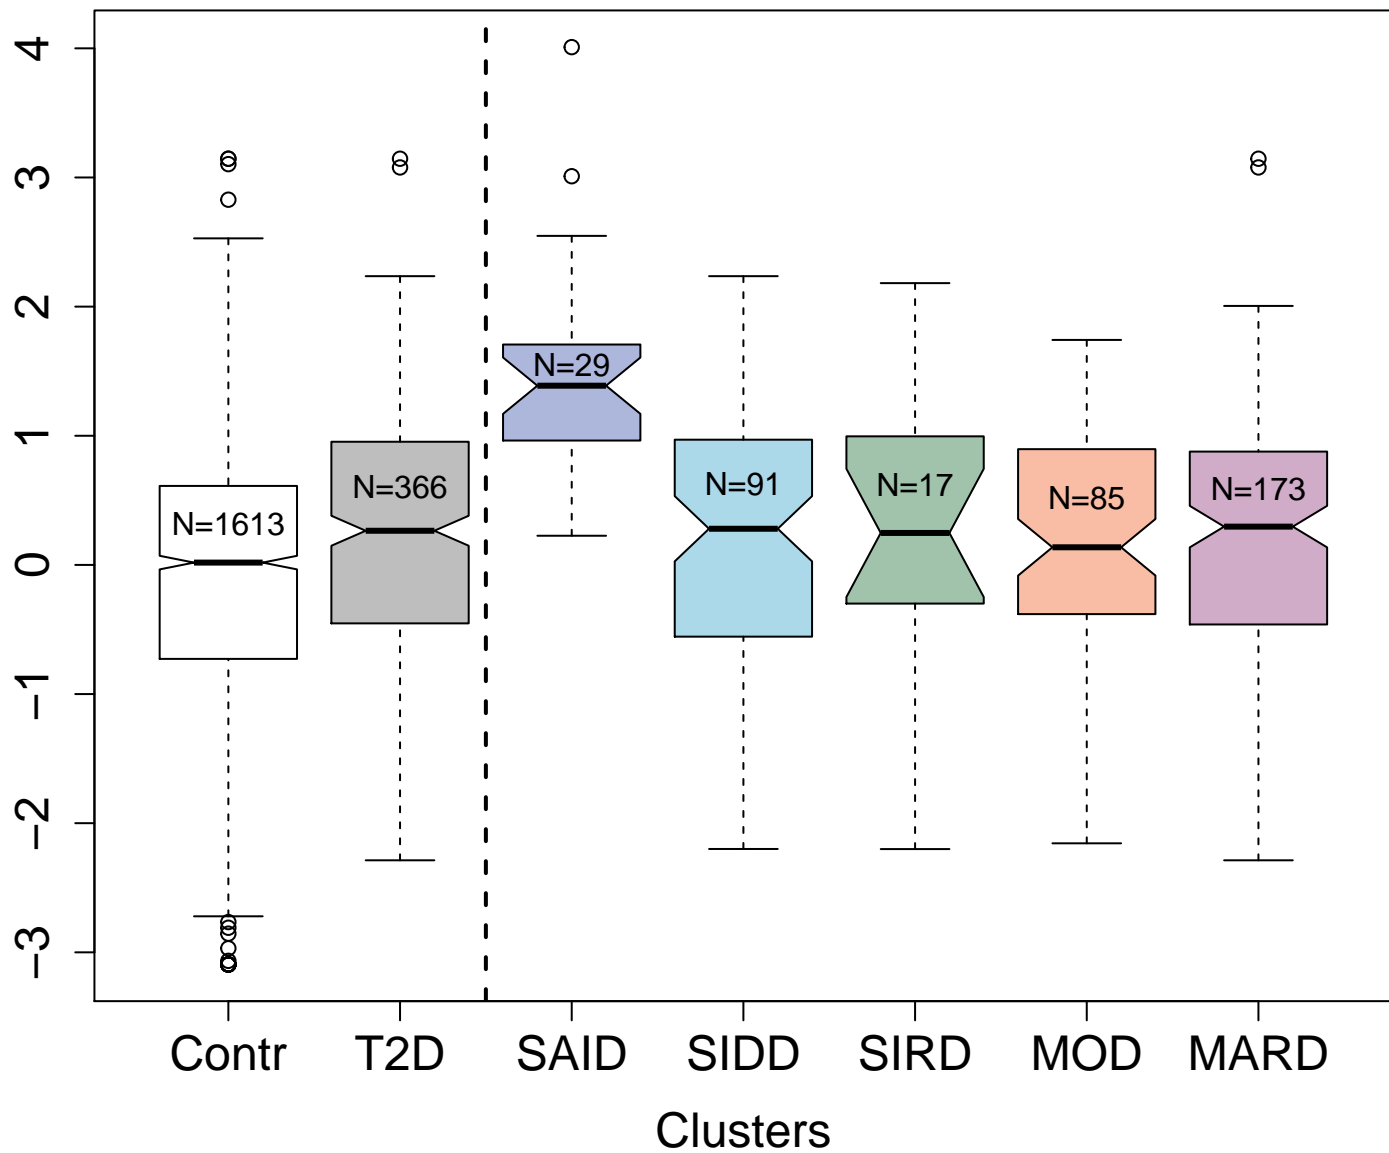

M57475 : sphingomyelin (d18:1/19:0, d19:1/18:0)\*

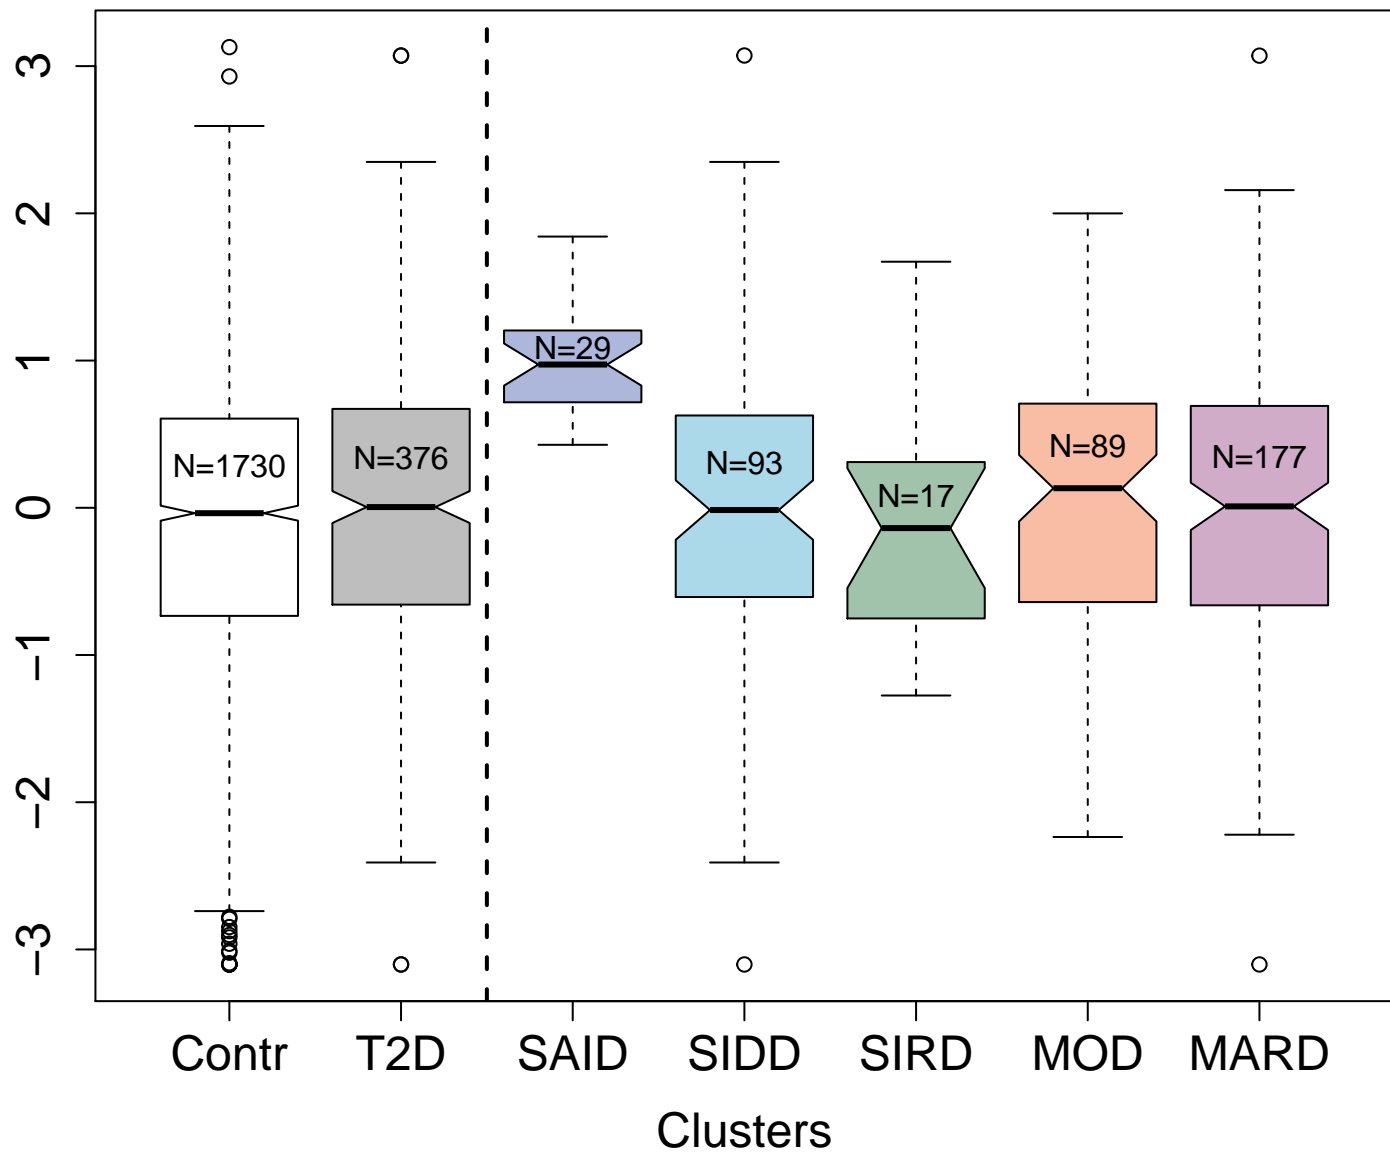

M1505 : orotate

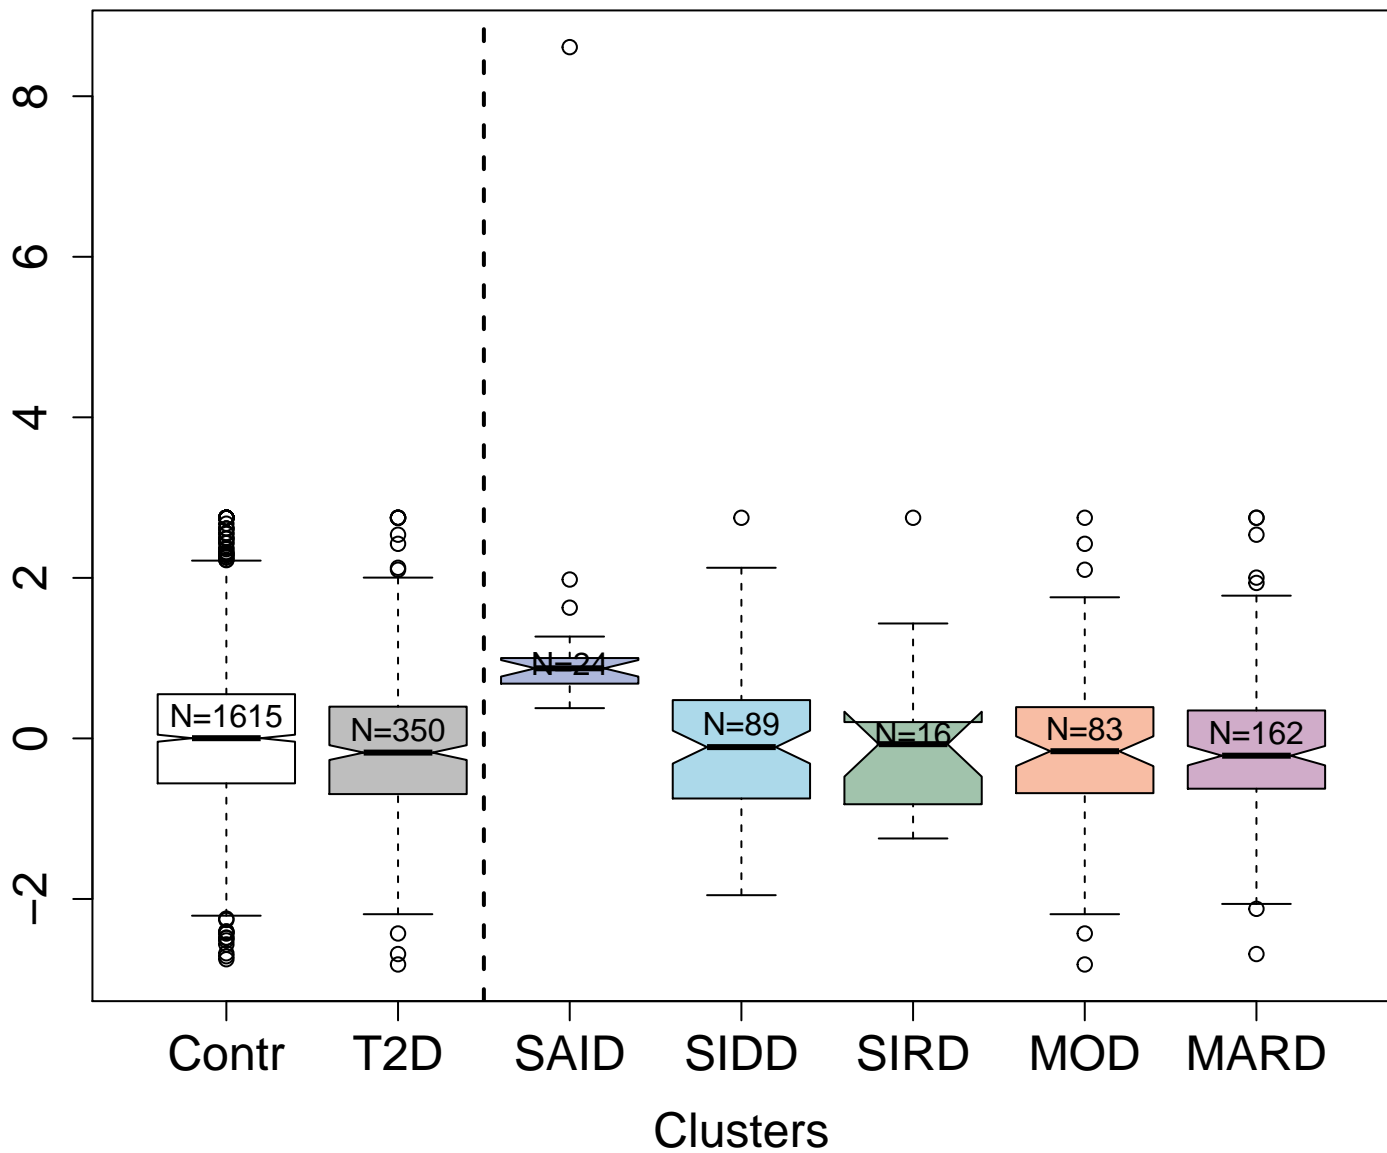



M47708 : X - 12283

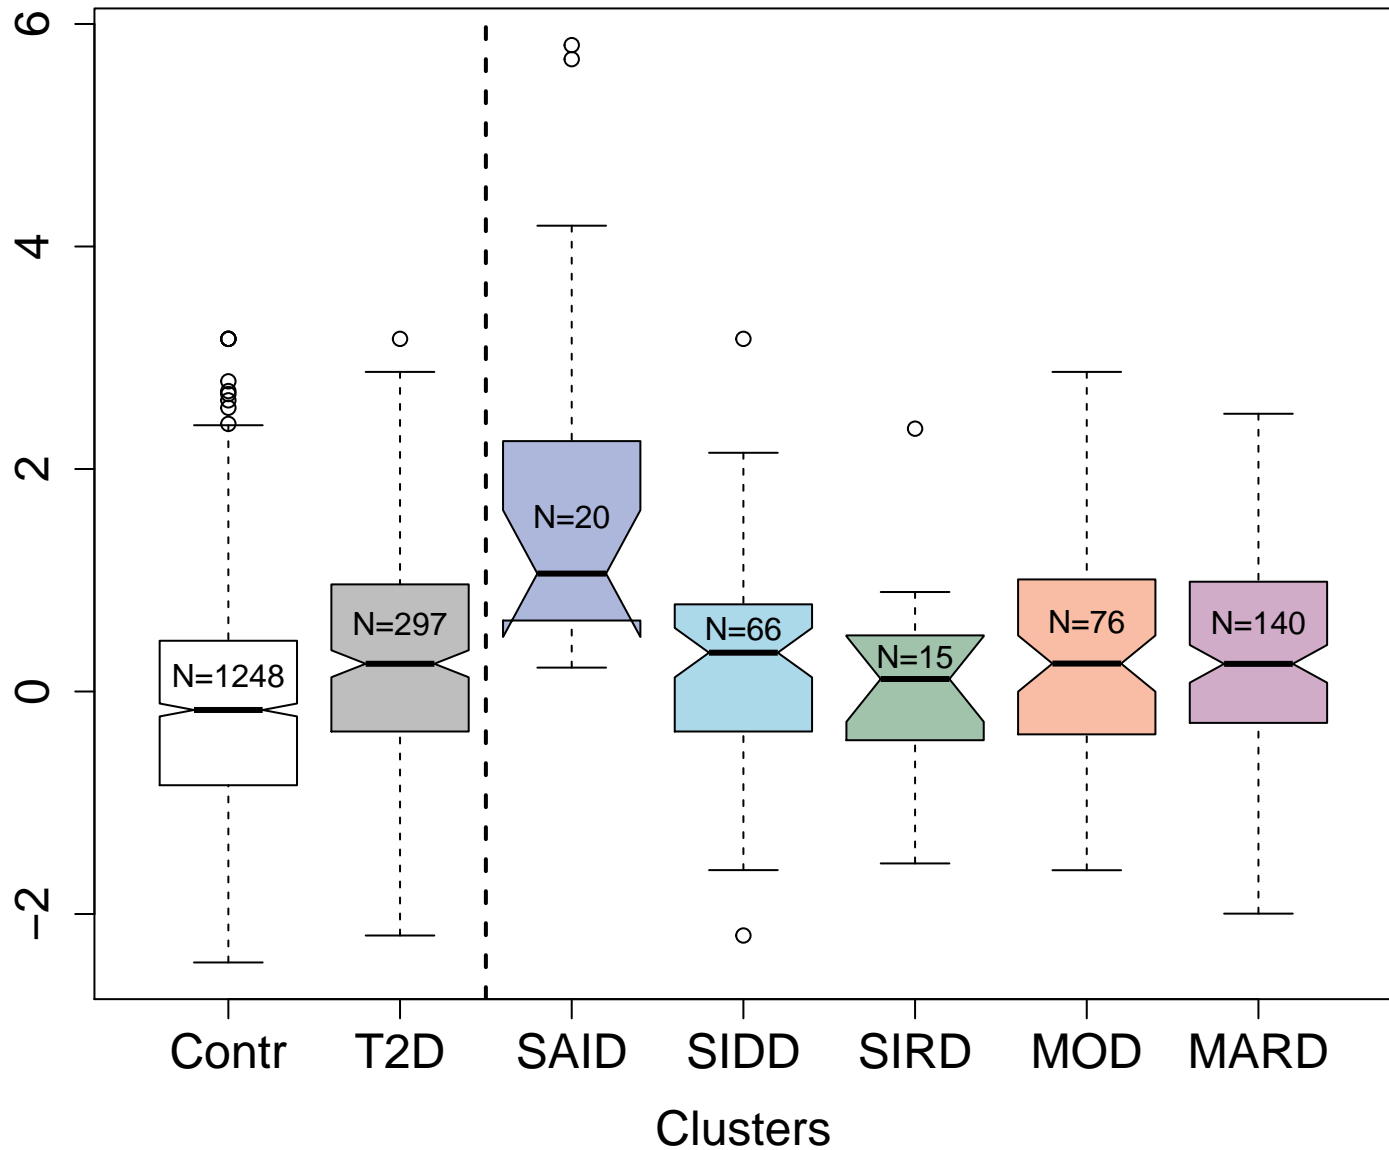

M37174 : 21-hydroxypregnenolone monosulfate (1)

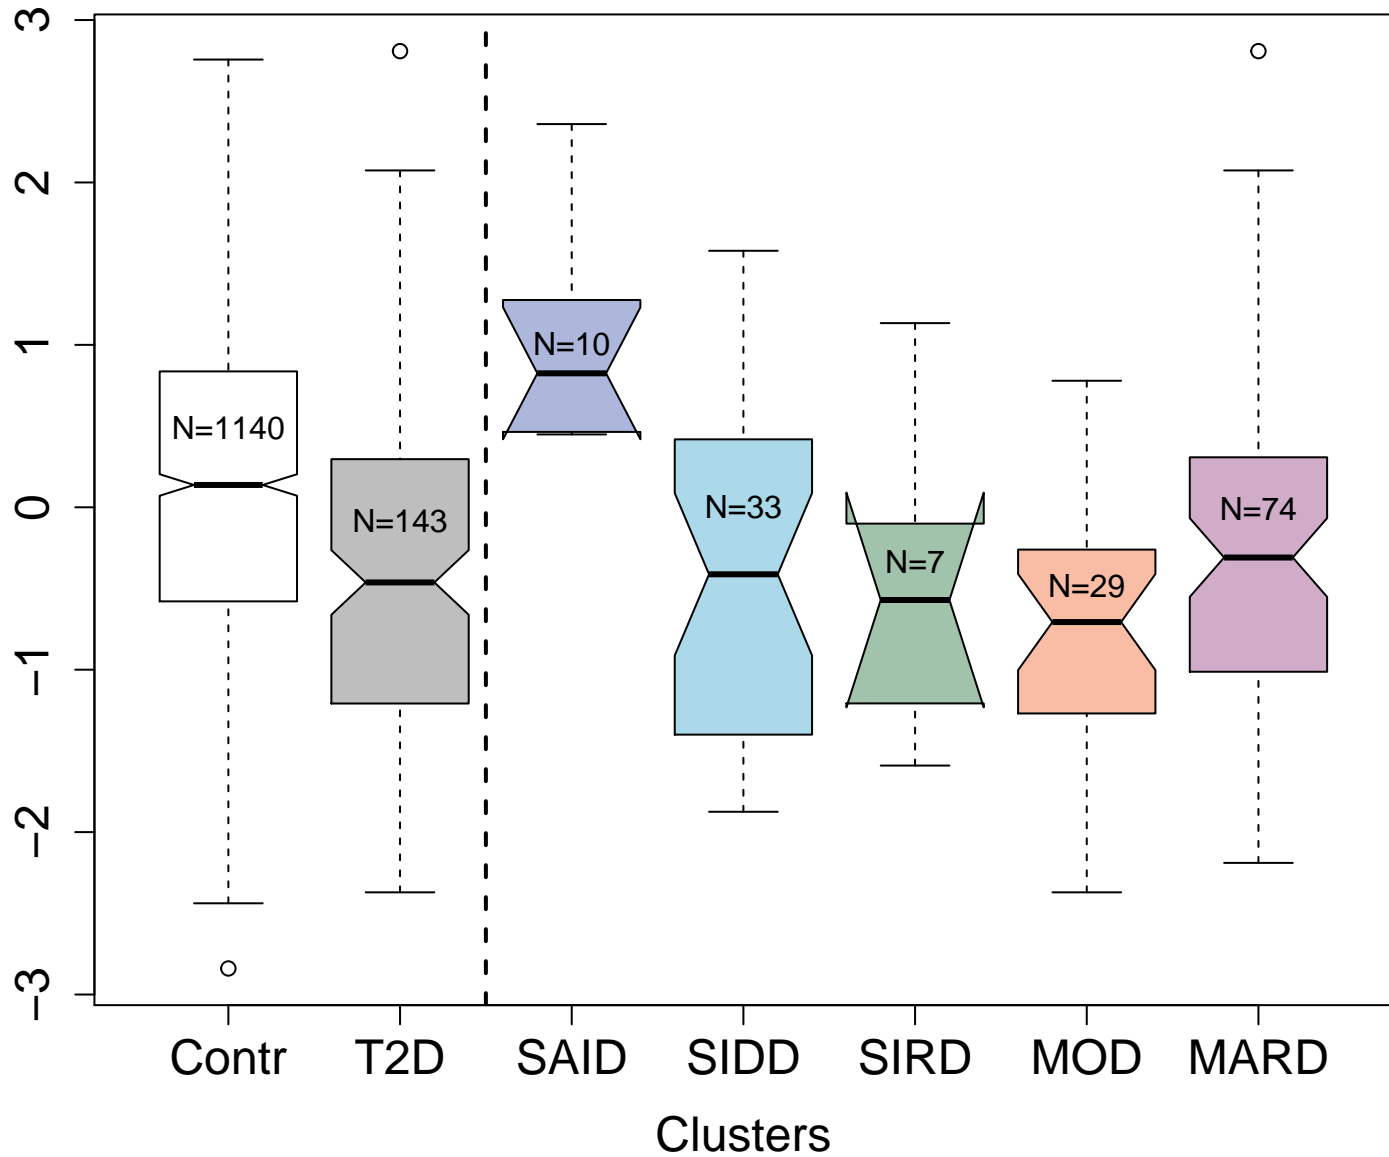

M569 : caffeine

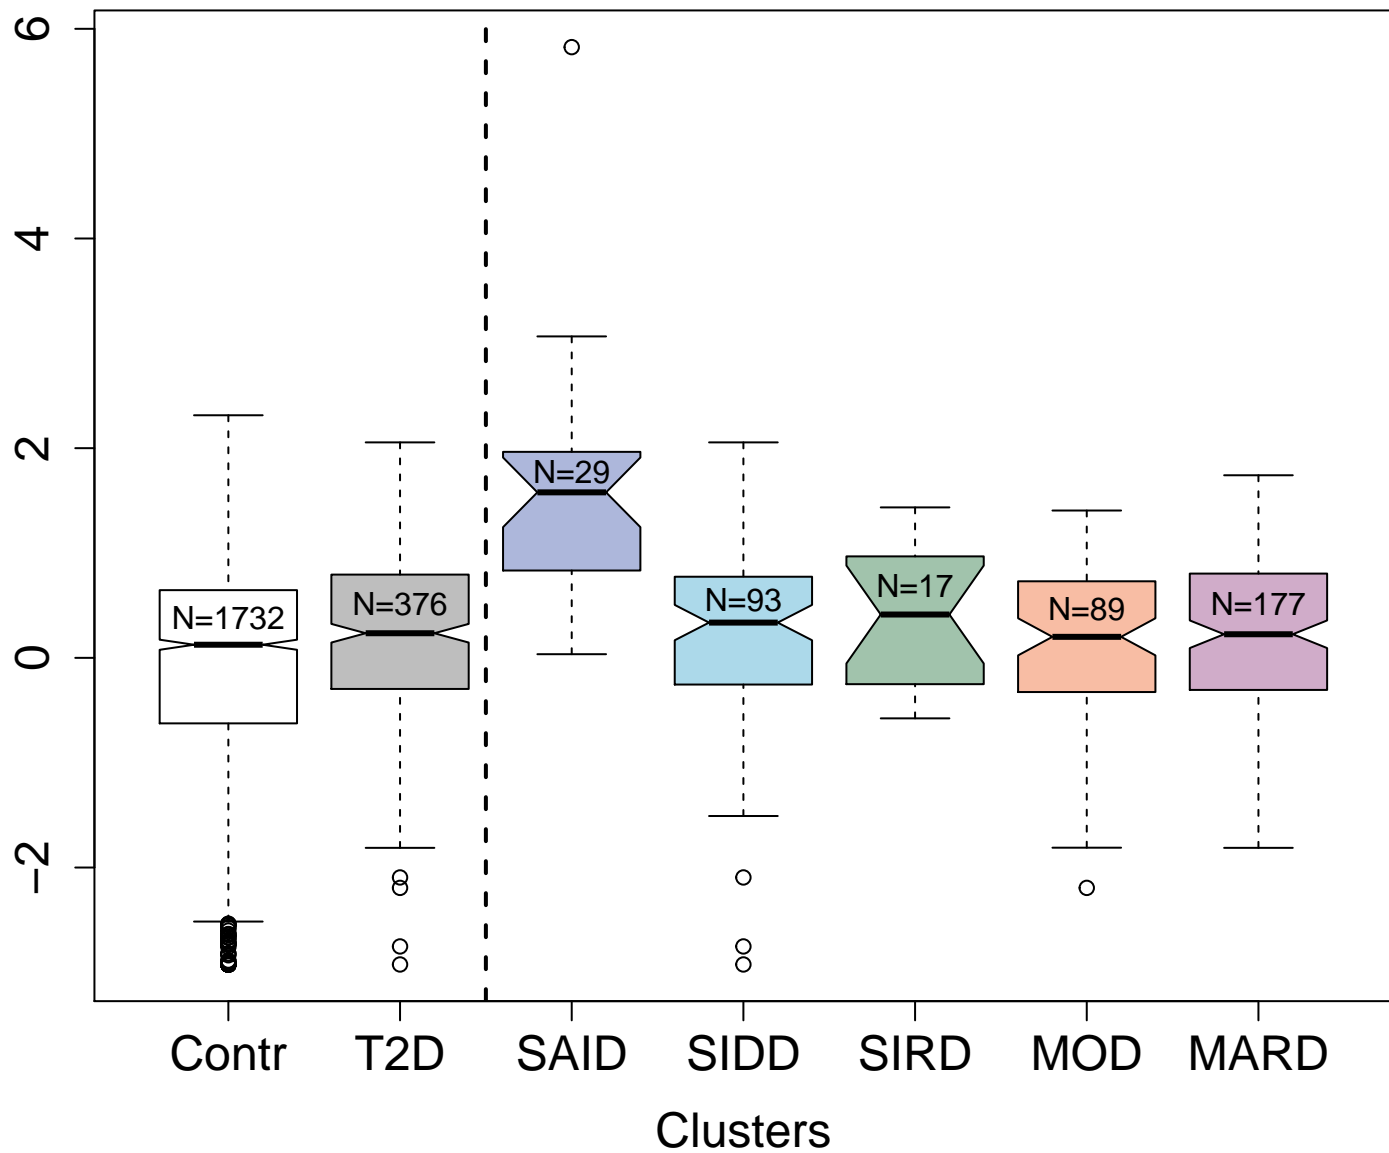

M46428 : X - 21383

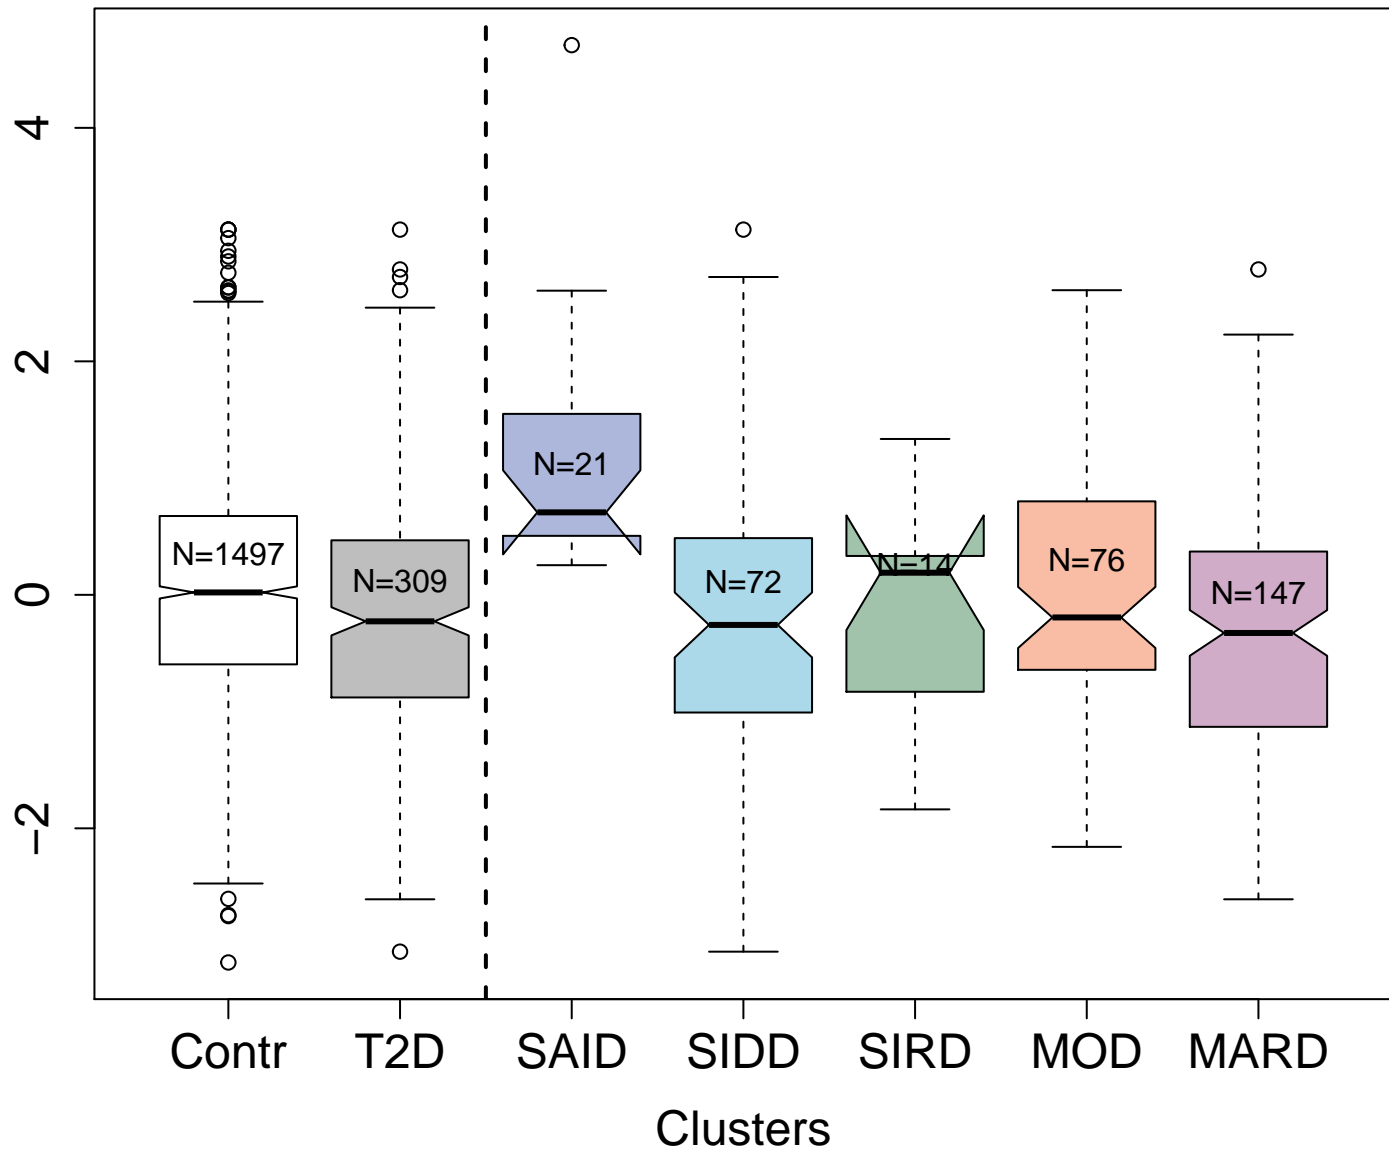

M34389 : 1-methylxanthine

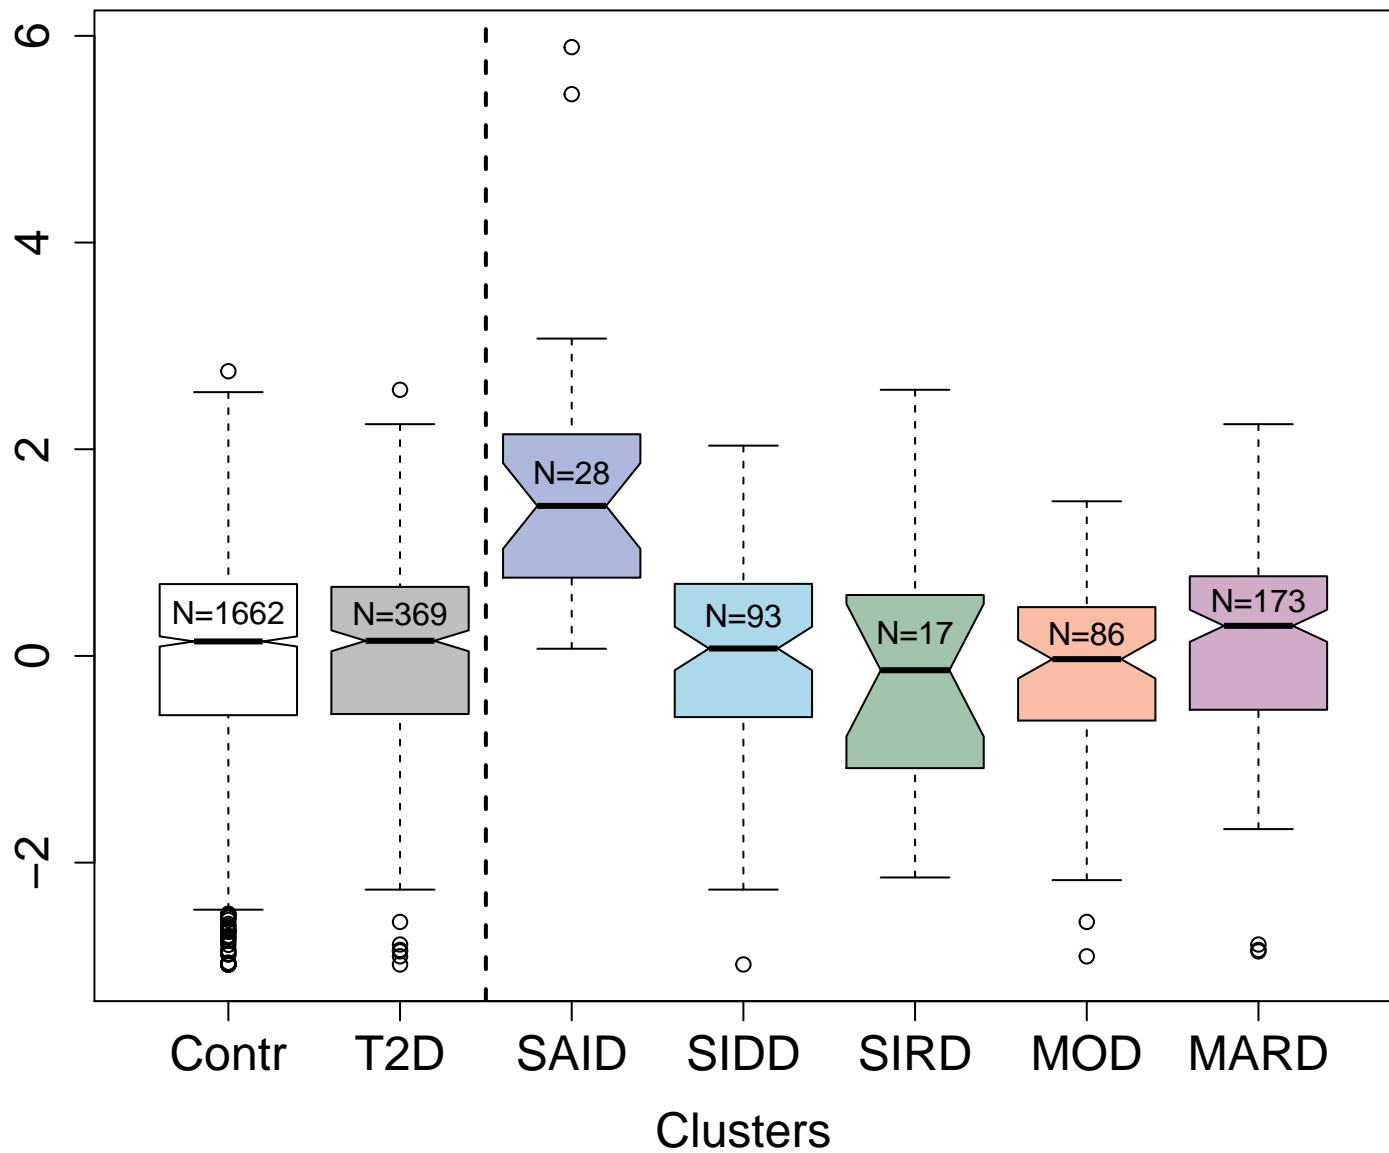

M48569 : acesulfame

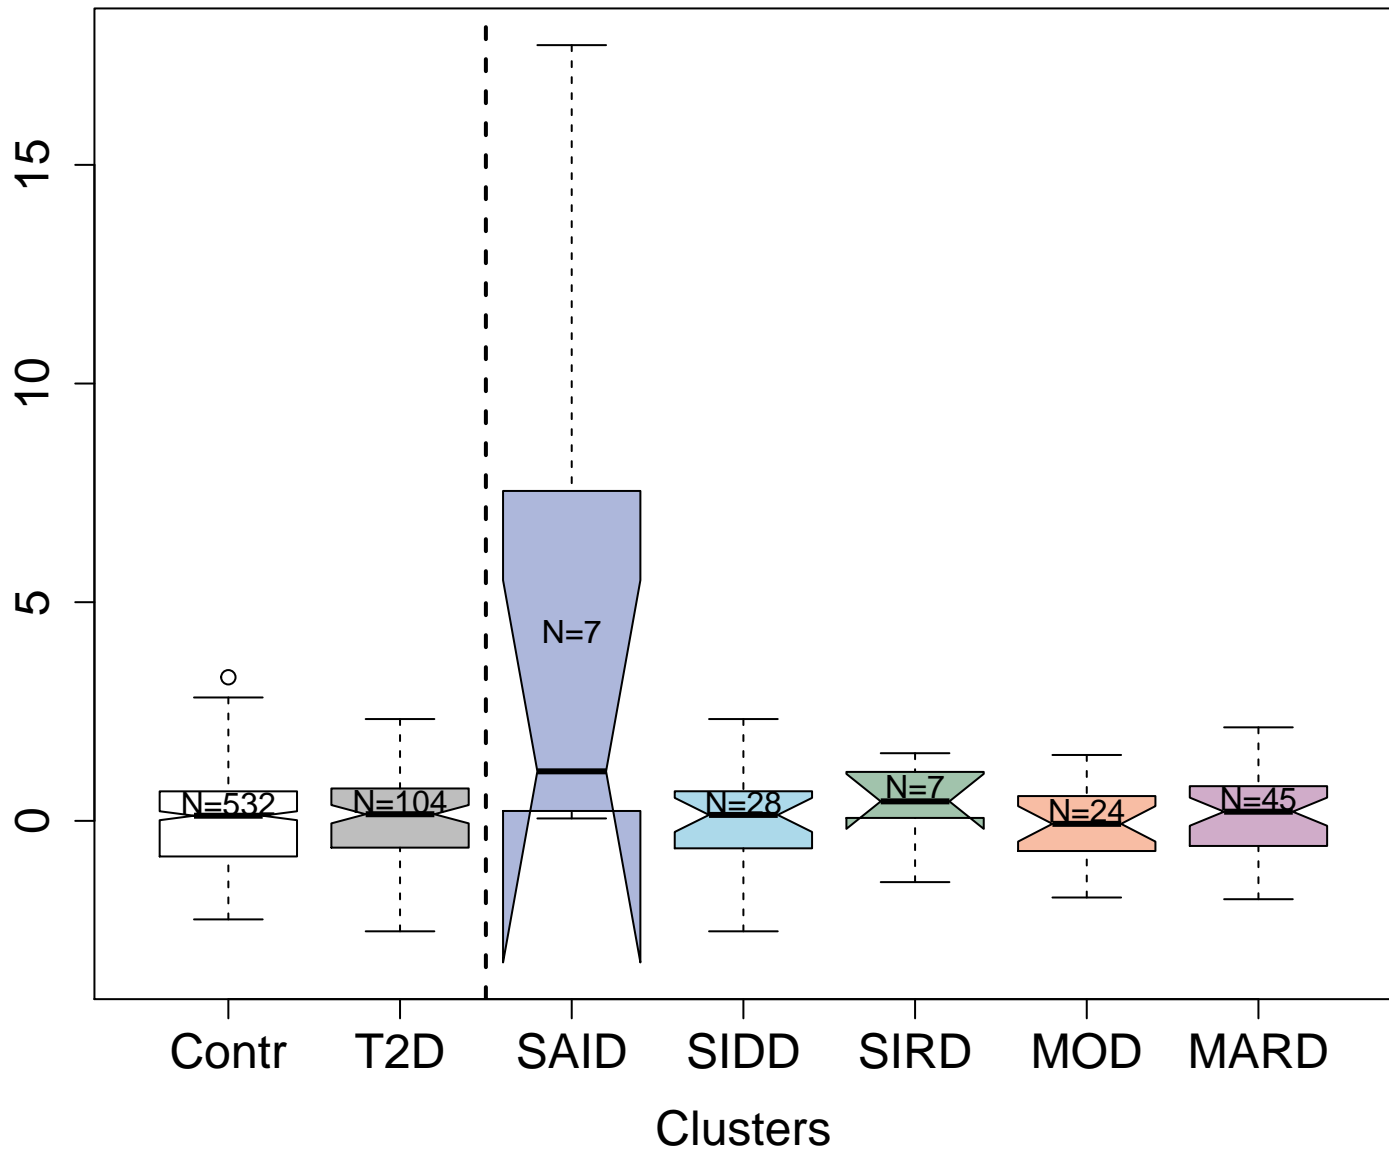

M33441 : isobutyrylcarnitine (C4)

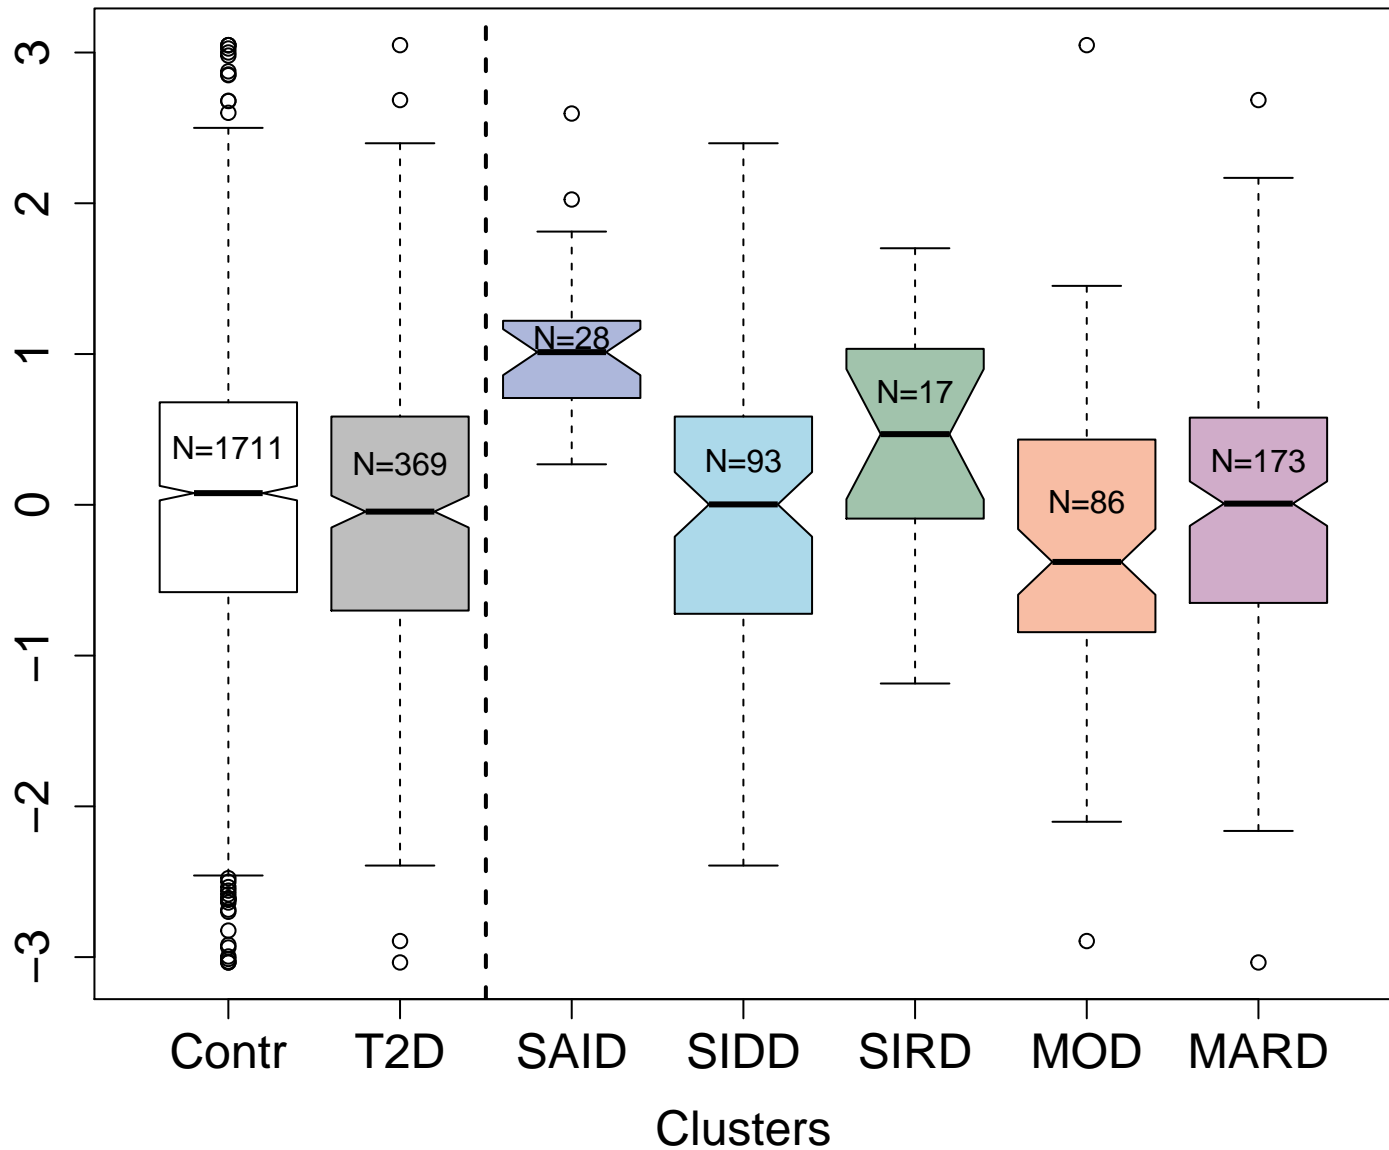

M553 : cotinine

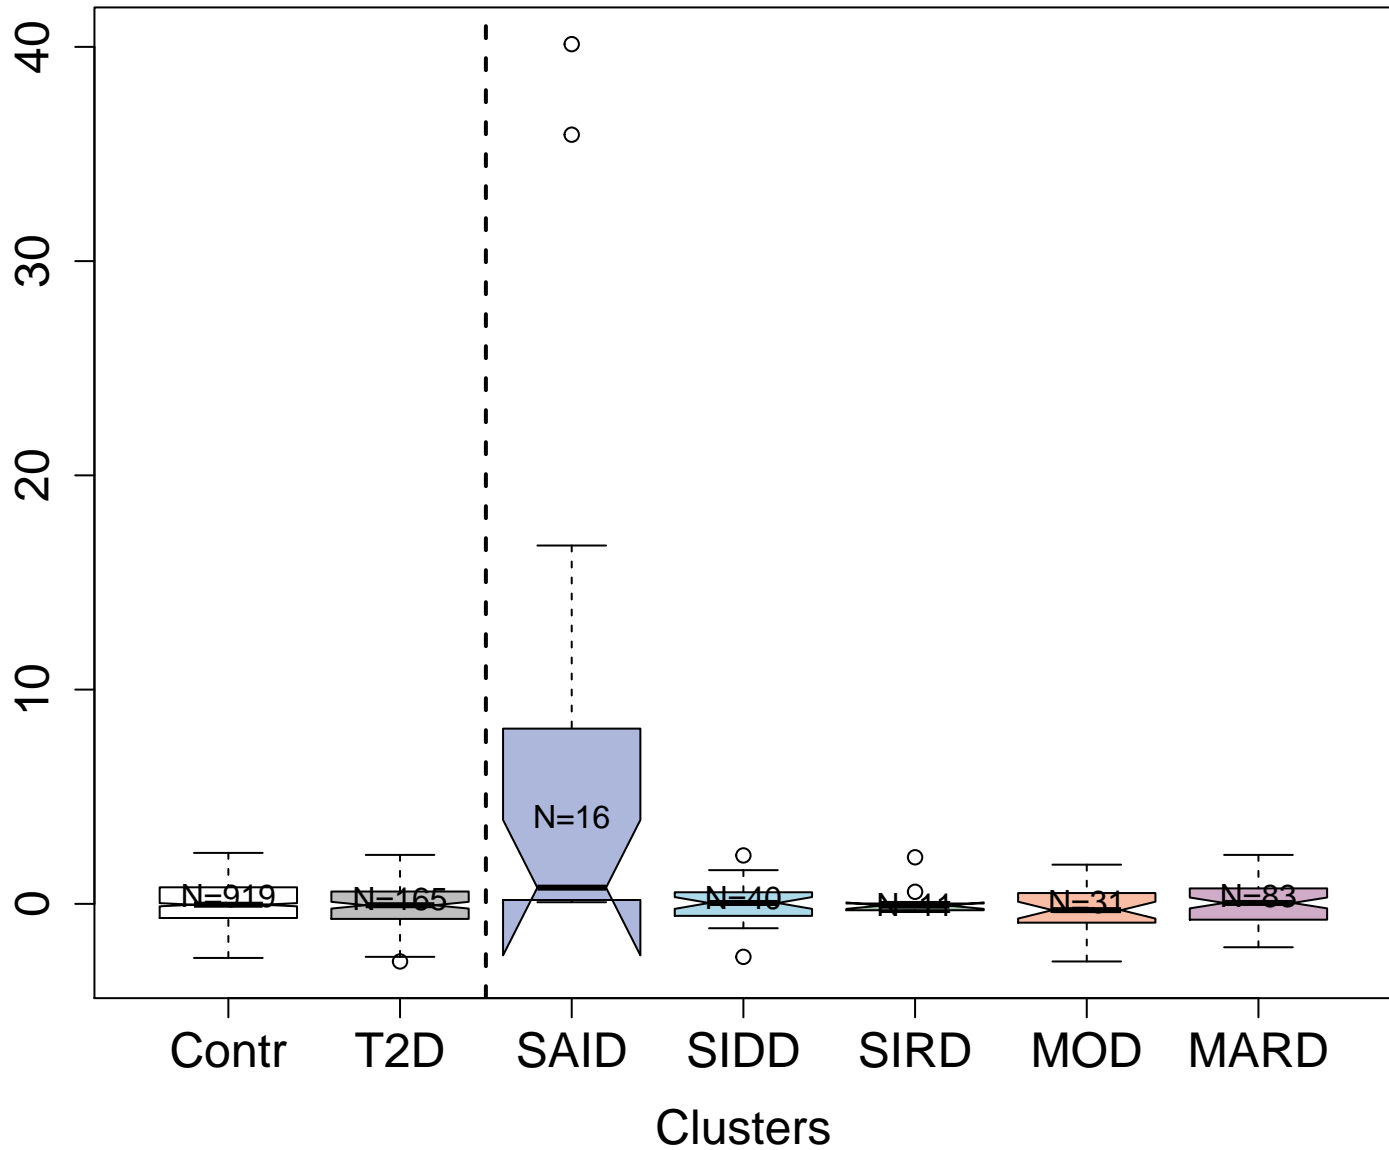

Supplement: 41467_2022_34754_MOESM5_ESM.pdf [file 41467_2022_34754_MOESM5_ESM.pdf]
