# Supplementary material for: Metabolic and proteomic signatures of type 2 diabetes subtypes in an Arab population
Source: PubMed Central journal article supplement (PMC9675829; doi:10.1038/s41467-022-34754-z), 2022-11-19
Supplement: 41467_2022_34754_MOESM3_ESM.pdf [file 41467_2022_34754_MOESM3_ESM.pdf]

**Supplementary Data 1:** Box plots for all protein levels associated with a T2D specific cluster. Data in boxplots are presented as follows: lower and upper whiskers represent the minima and maxima respectively, box centers represent the median values, bounds of boxes represent the first and third quartiles, notches represent the 95% confidence interval of the median, and circles represent outliers.

**Supplementary Data 2:** Box plots for all metabolite levels associated with a T2D specific cluster. Data in boxplots are presented as follows: lower and upper whiskers represent the minima and maxima respectively, box centers represent the median values, bounds of boxes represent the first and third quartiles, notches represent the 95% confidence interval of the median, and circles represent outliers.

**Supplementary Data 3-21:** Provided in one Excel file.

SD3: Cluster coordinates in QBB vs ANDIS for the four T2D subtypes.

SD4: T2D-protein associations.

SD5: Metabolite-T2D associations.

SD6: Replication of metabolite-T2D associations in QMDiab.

SD7: Cluster-specific significant proteins.

SD8: Cluster-specific significant metabolites.

SD9: Effect of confounding on cluster-specific proteins.

SD10: Effect of confounding on cluster-specific metabolites.

SD11: Cluster-specific metabolites correlation to diet and microbiome.

SD12: Replication of subgroup-specific proteins in AGES.

SD13: Replication of cluster-specific proteins from the IMI-RHAPSODY study.

SD14: Replication of subgroup-specific proteins in ANDIS.

SD15: Replication of cluster-specific metabolites from the IMI-RHAPSODY study.

SD16: Numbers and percentages for drugs taken by the T2D cases versus controls according to ATC anatomical main groups.

SD17: Number/percentage of drugs taken by ATC therapeutic subgroup for the 420 T2D QBB participants versus 1,735 controls.

SD18: Cluster-specific significant drugs.

SD19: Study demographics for training and testing sets.

SD20: Protein Information.

SD21: Metabolite Information.
